# Supplementary material for: XAB2 dynamics during DNA damage-dependent transcription inhibition
Source: eLife journal article supplement (doi:10.7554/elife.77094), 2022-07-26

Figure 3 – figure supplement 1C

Colorimetric 1

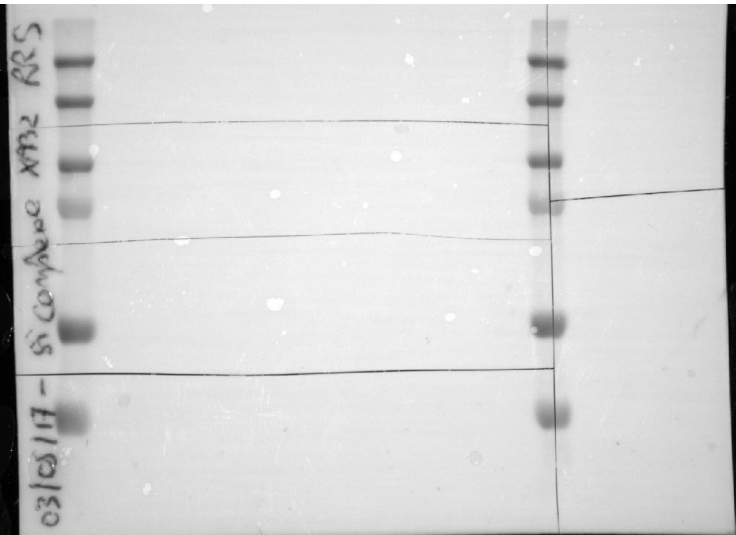

Exposition 60sec

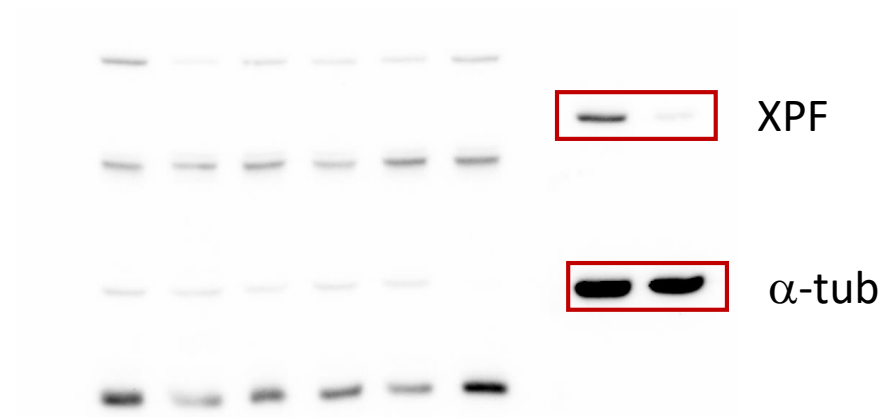

Figure 3 – figure supplement 1C

Colorimetric 1



Exposition 60sec

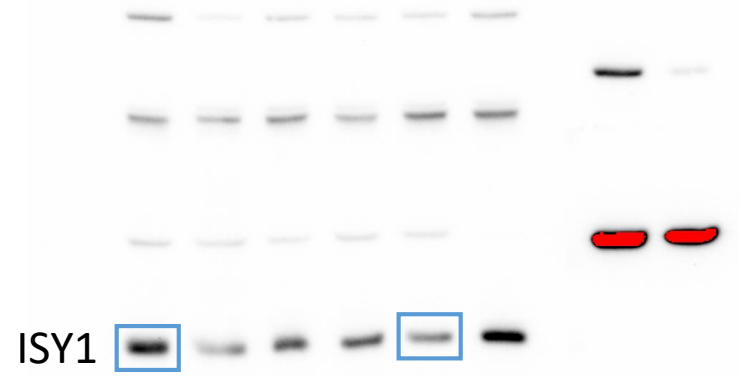

ISY1

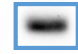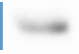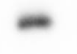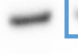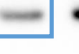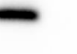

Exposition 120sec

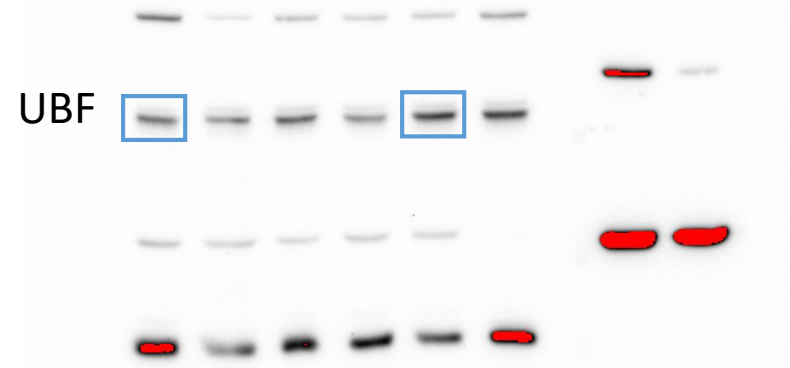

UBF

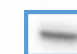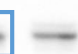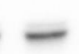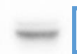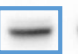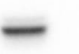

Figure 3 – figure supplement 1C

Colorimetric 1



Exposition 180sec

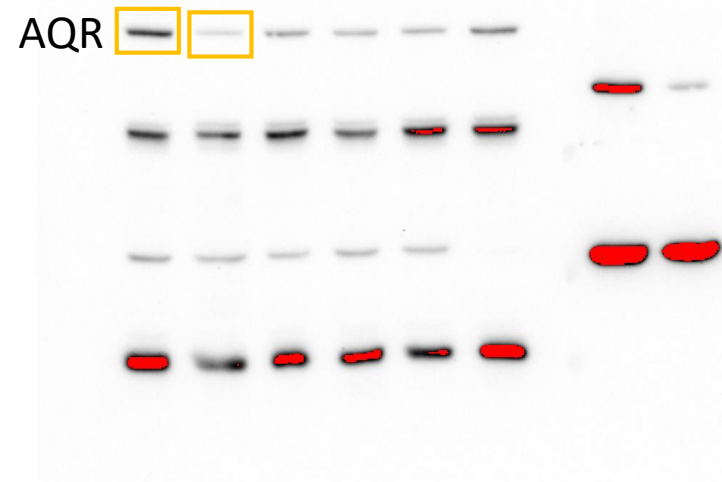

Exposition 120sec

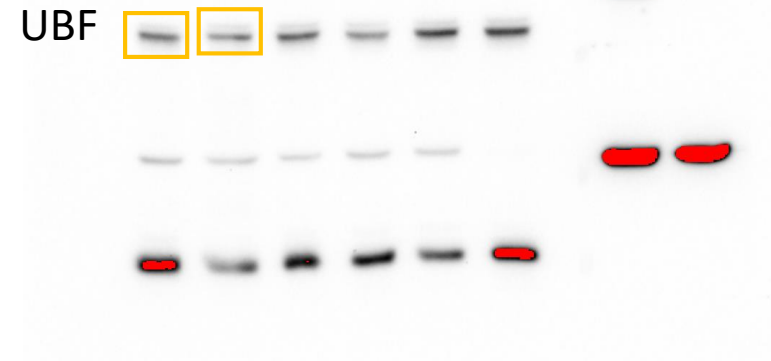

Figure 3 – figure supplement 1C

Colorimetric 1



Exposition 600sec

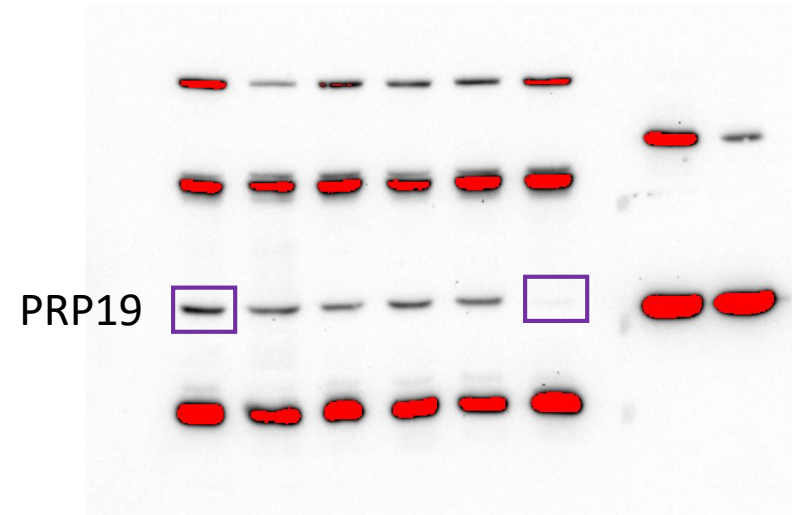

Exposition 120sec

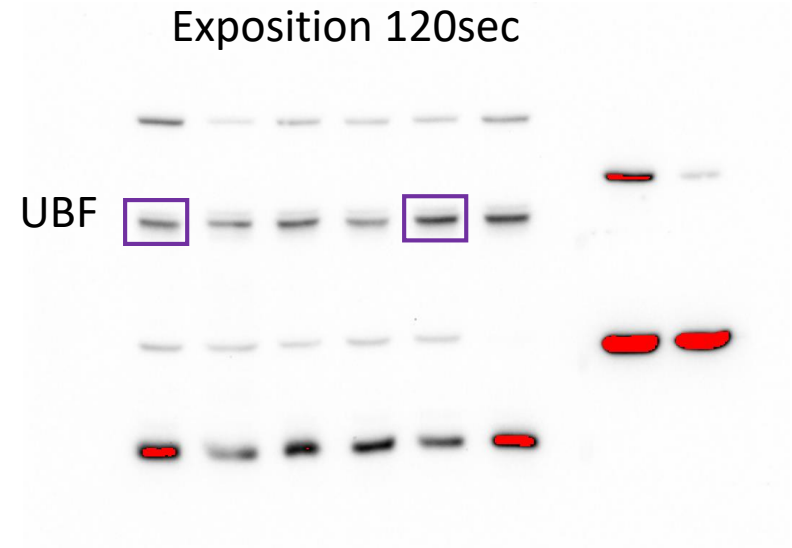

Figure 3 – figure supplement 1C

Colorimetric 2

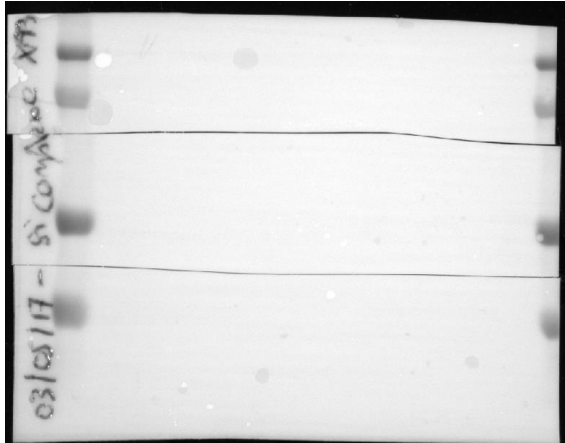

Exposition 1200sec-reblot

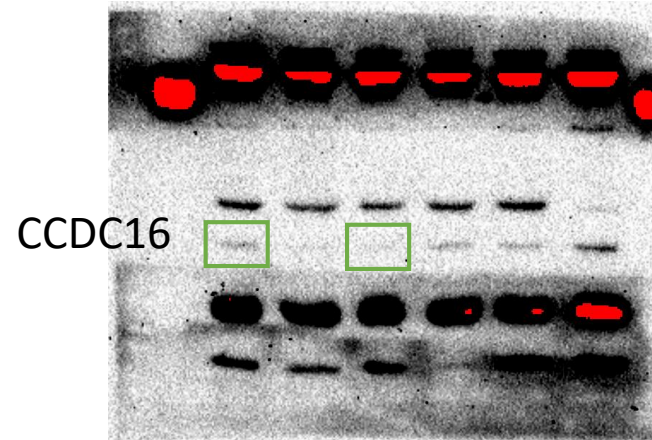

*source data 7*

Colorimetric 1

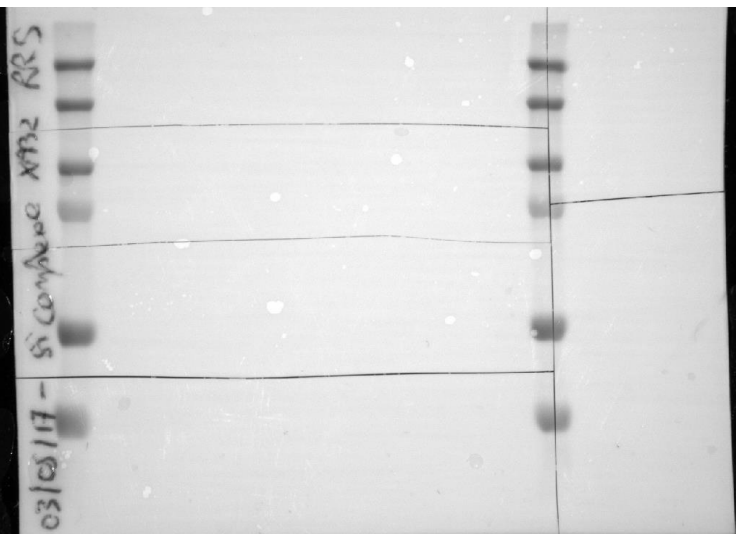

Exposition 120sec

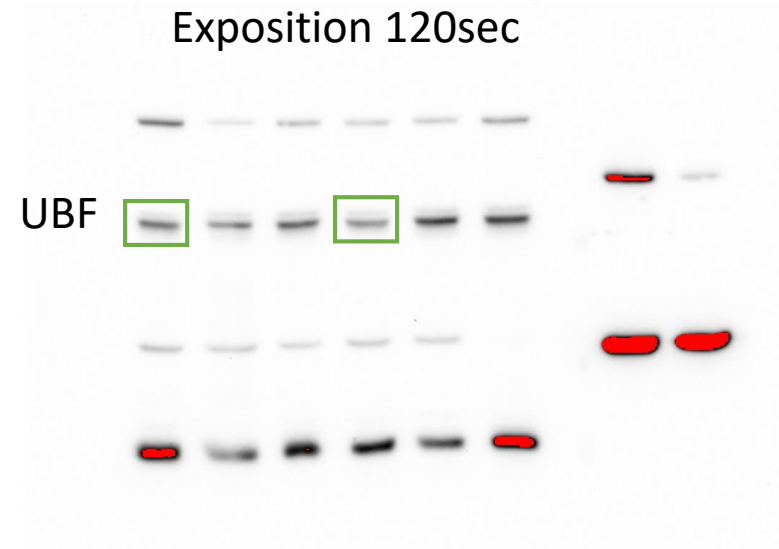

Figure 3 – figure supplement 1C

Colorimetric 2



Exposition 1200sec-reblot

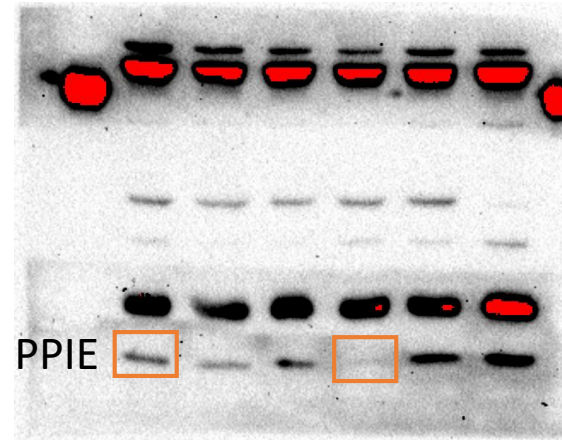

Colorimetric 1



Exposition 120sec

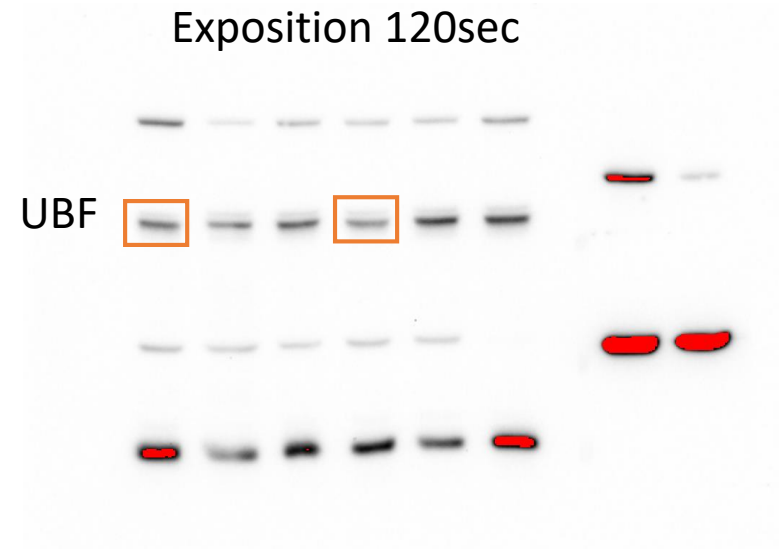

Supplement: fig3-figsupp1-data2 [file elife-77094-fig3-figsupp1-data2-v2.pdf]
