# Supplementary material for: XAB2 dynamics during DNA damage-dependent transcription inhibition
Source: eLife journal article supplement (doi:10.7554/elife.77094), 2022-07-26

Figure 1B

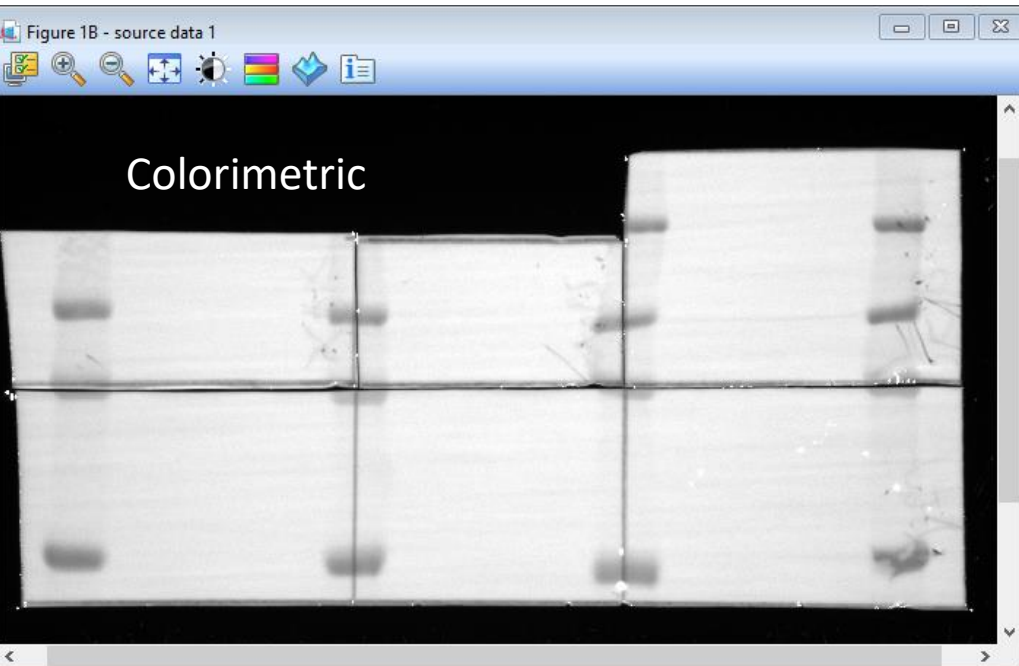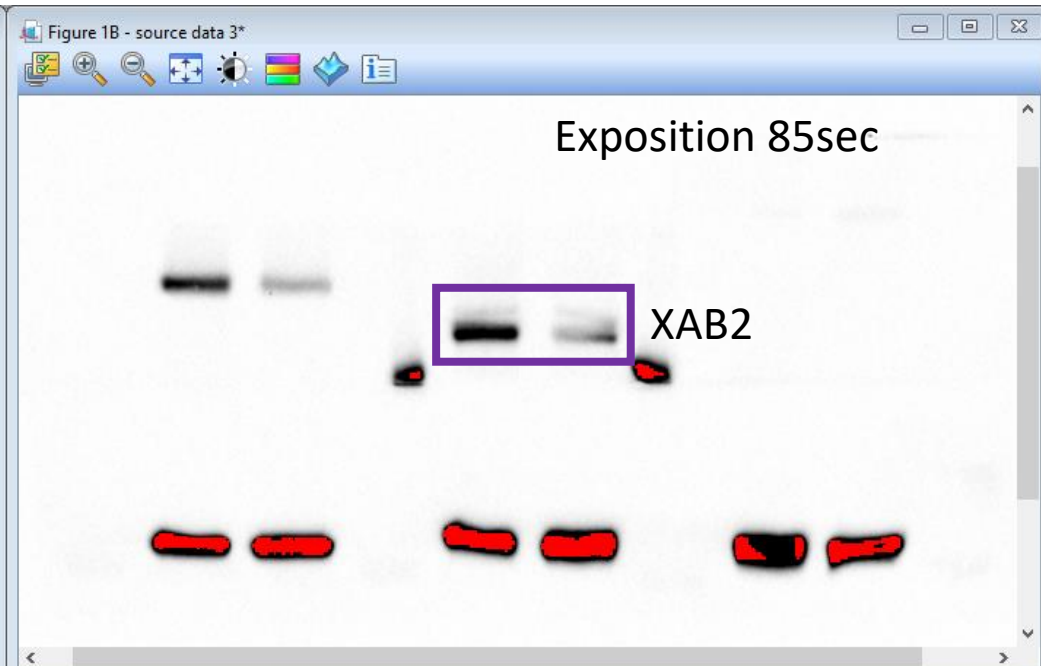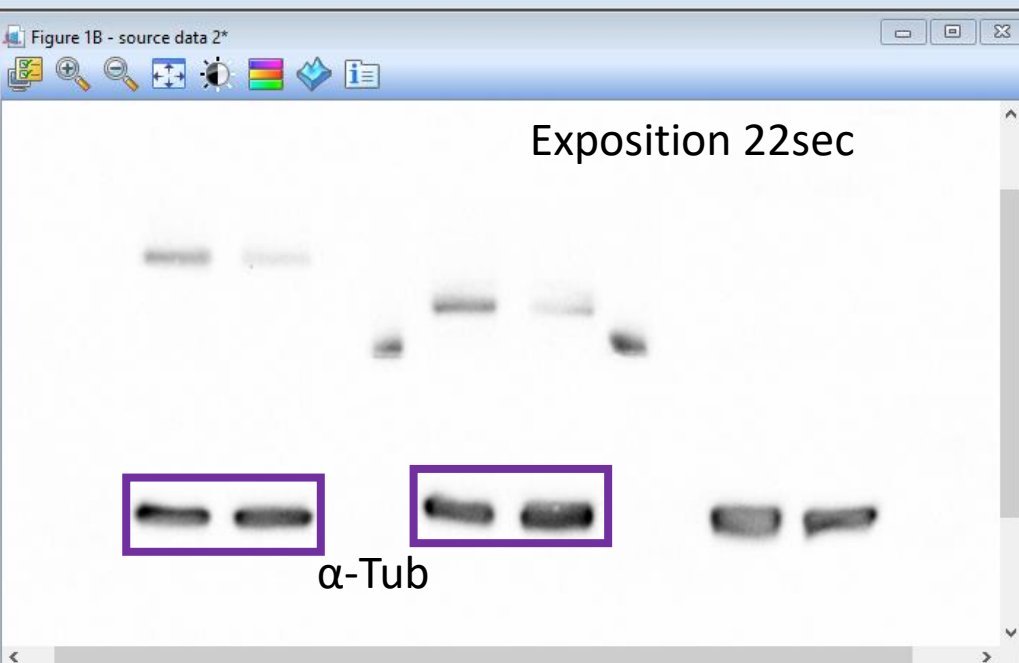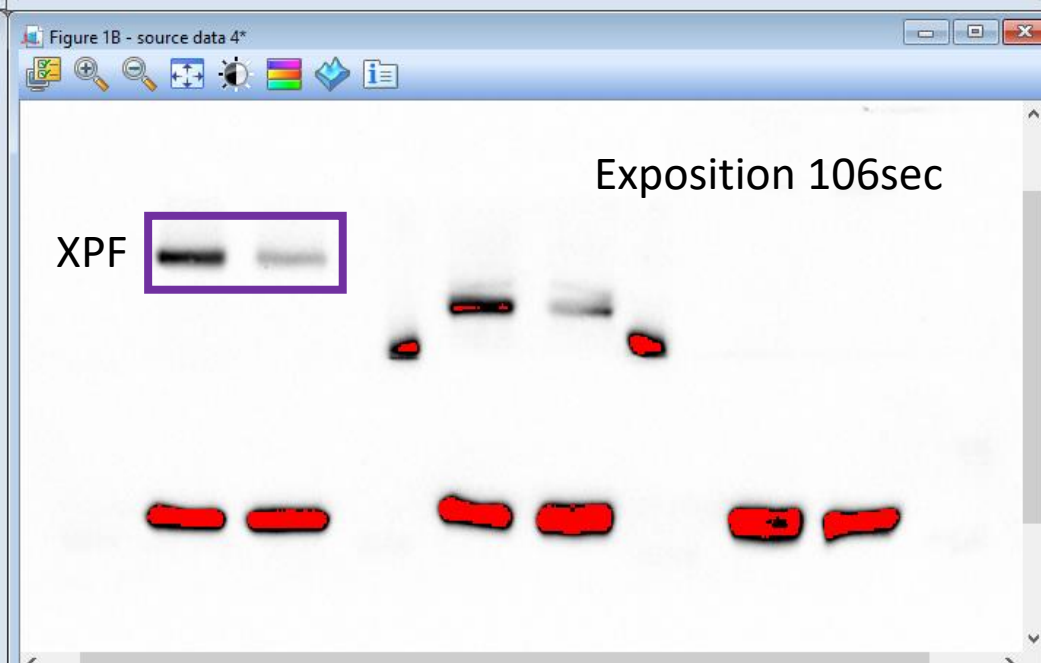

Supplement: fig1-data4 [file elife-77094-fig1-data4-v2.pdf]
