# Supplementary material for: XAB2 dynamics during DNA damage-dependent transcription inhibition
Source: eLife journal article supplement (doi:10.7554/elife.77094), 2022-07-26

# Figure 2 – figure supplement 2C

Colorimetric 1

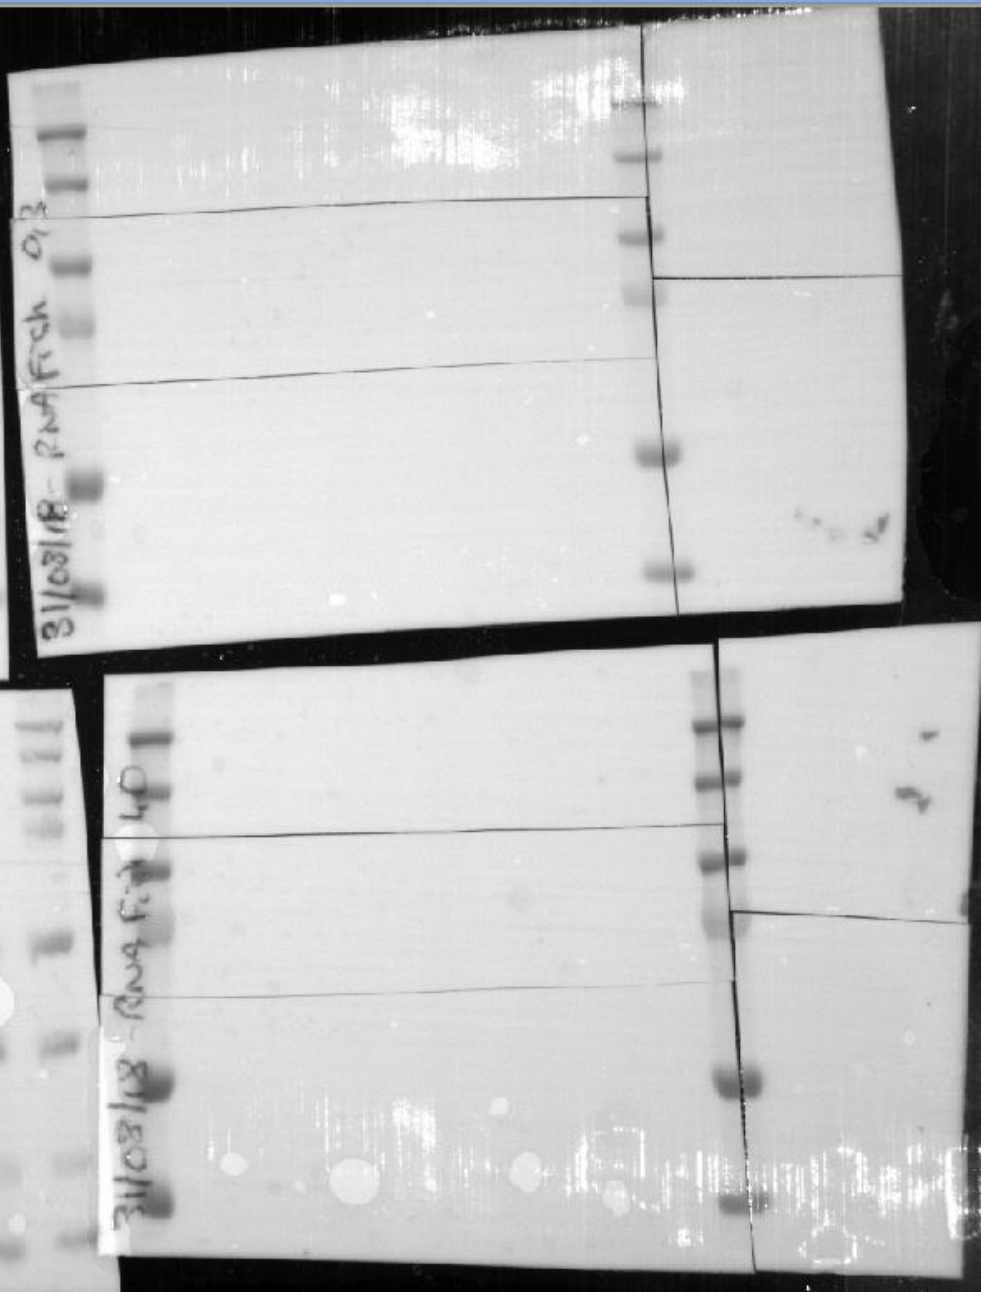

Exposition 30sec

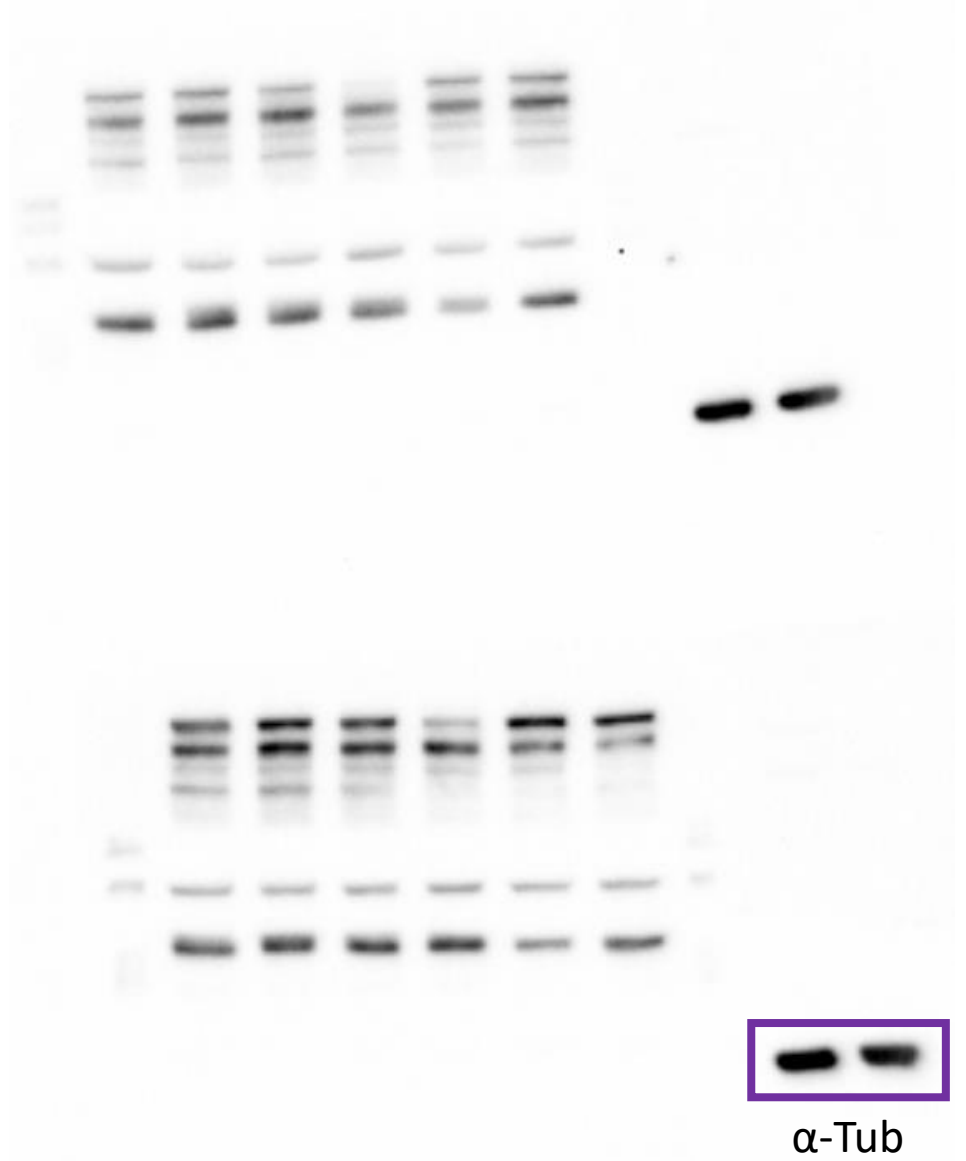

# Figure 2 – figure supplement 2C

Colorimetric 2

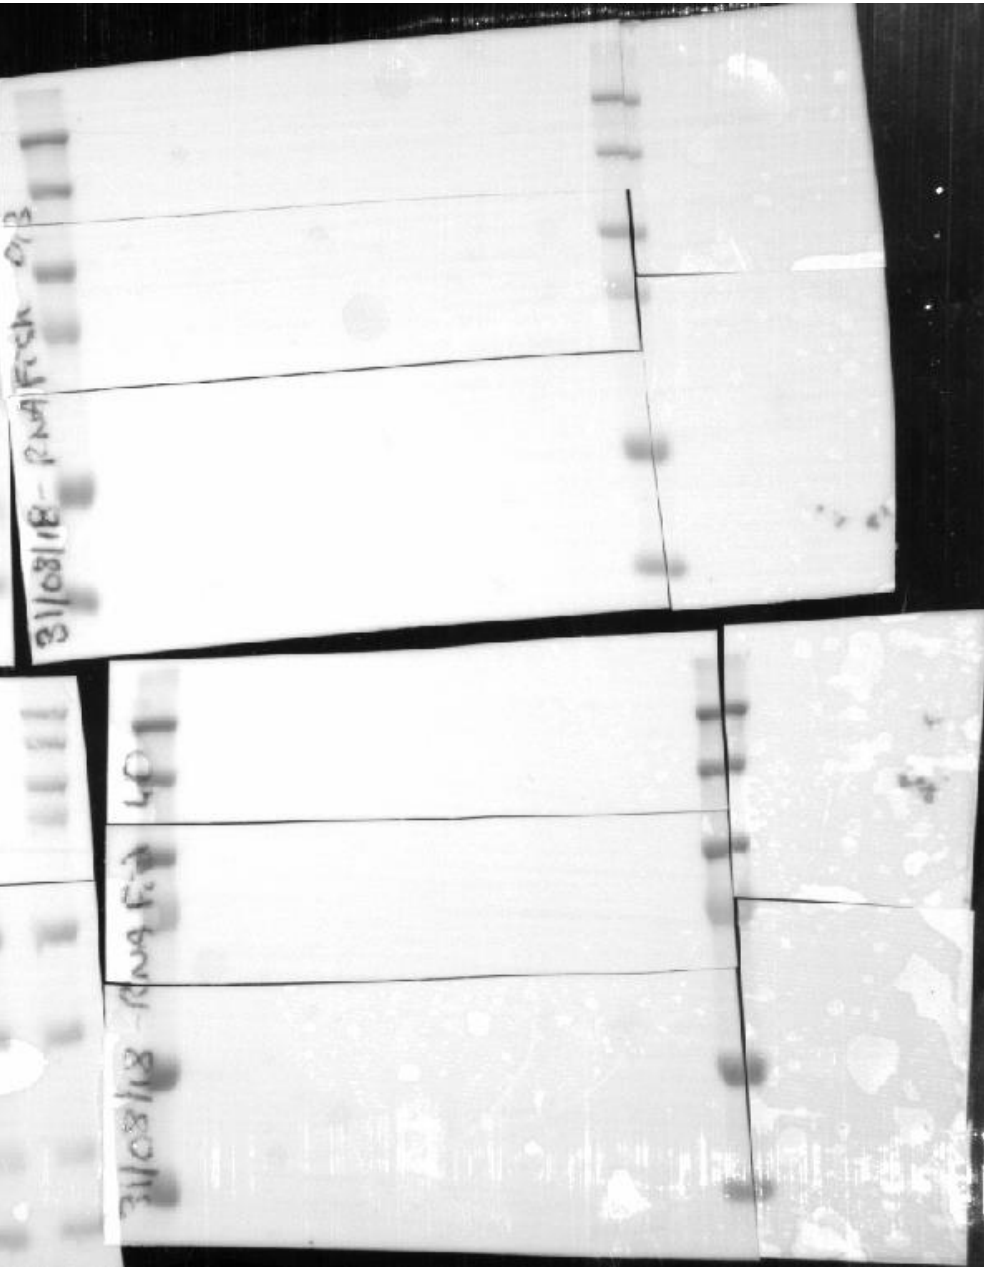

Exposition 140sec – ECL++

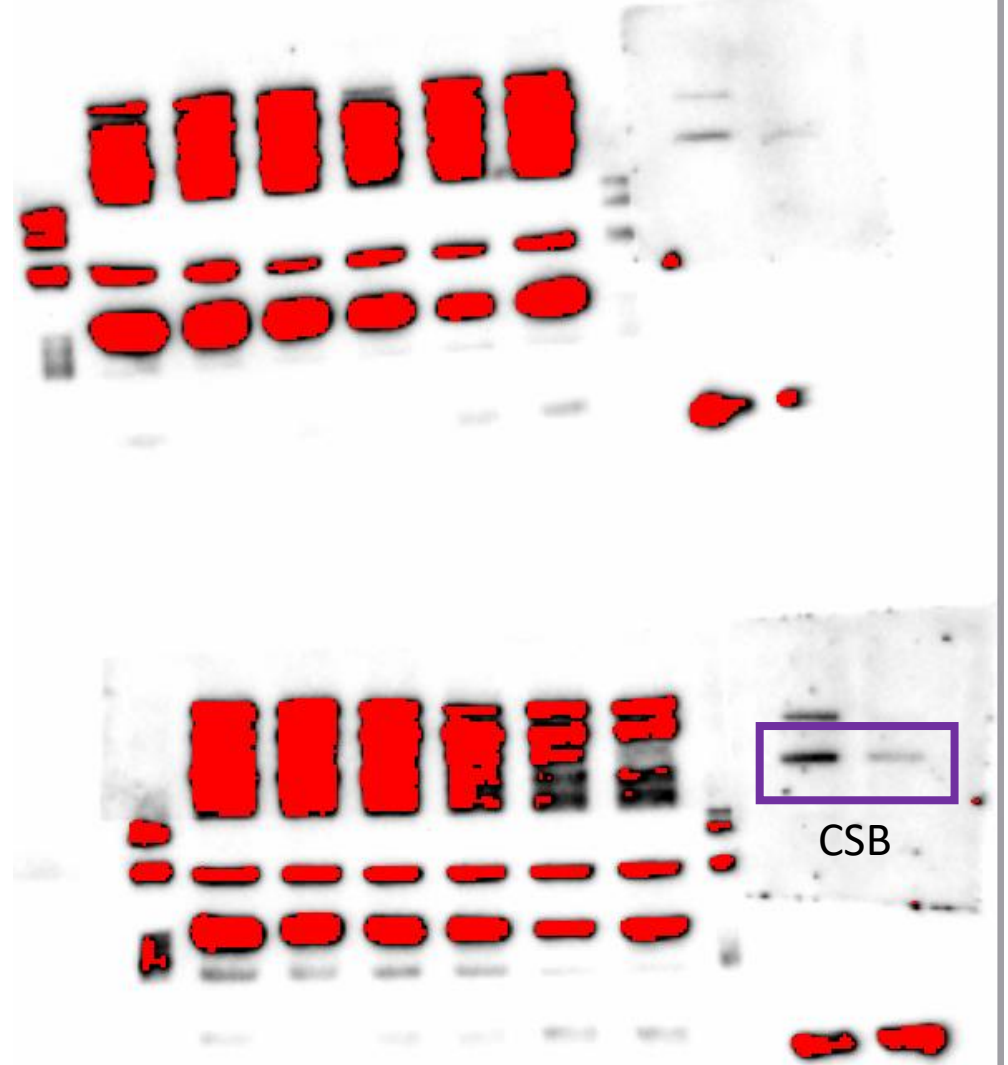

Supplement: fig2-figsupp2-data2 [file elife-77094-fig2-figsupp2-data2-v2.pdf]
