# Supplementary material for: XAB2 dynamics during DNA damage-dependent transcription inhibition
Source: eLife journal article supplement (doi:10.7554/elife.77094), 2022-07-26

Figure 5A And Figure 5 – figure supplement 1A

Colorimetric

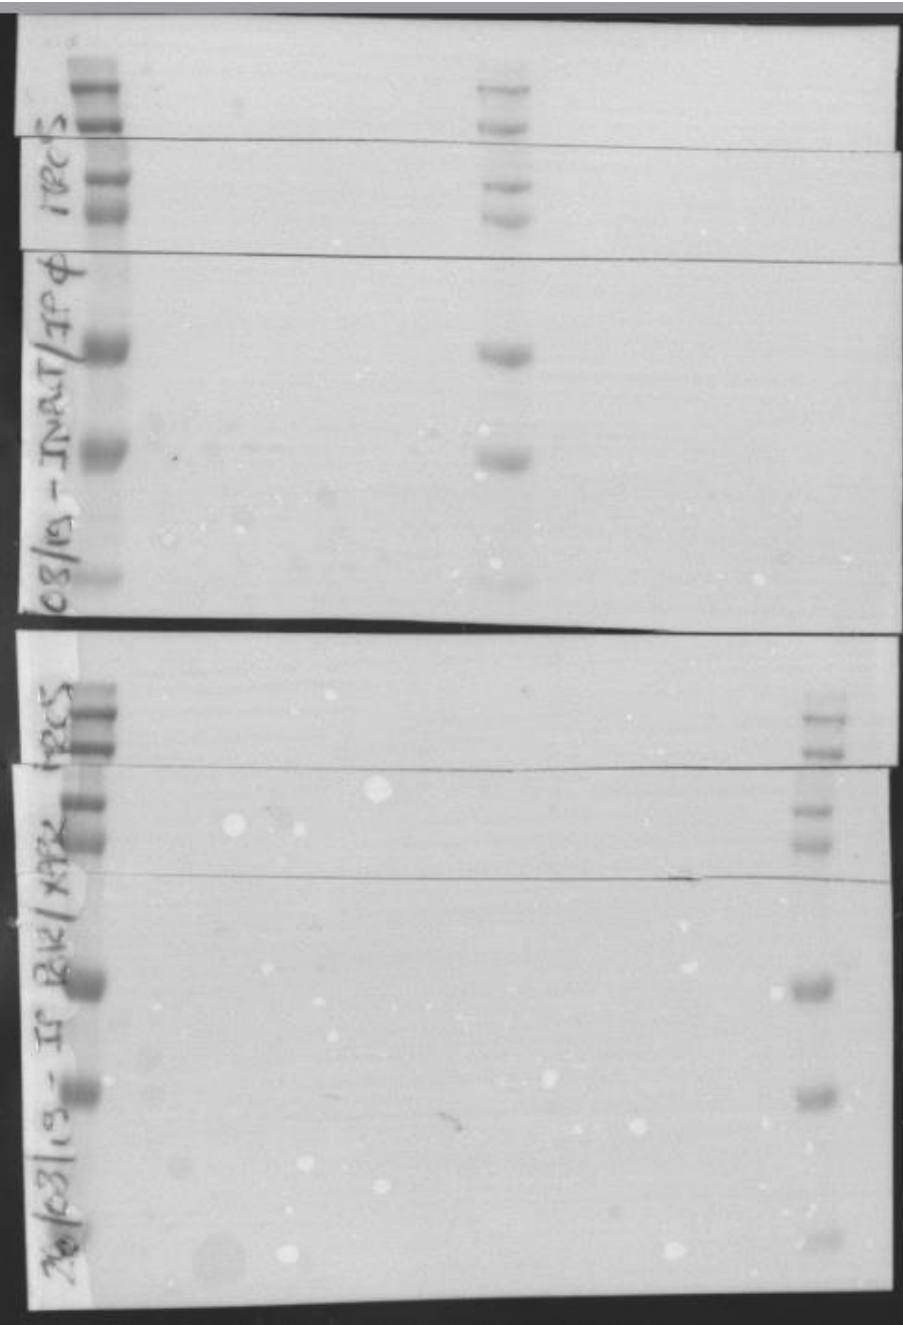

MRC5

Exposition 60sec

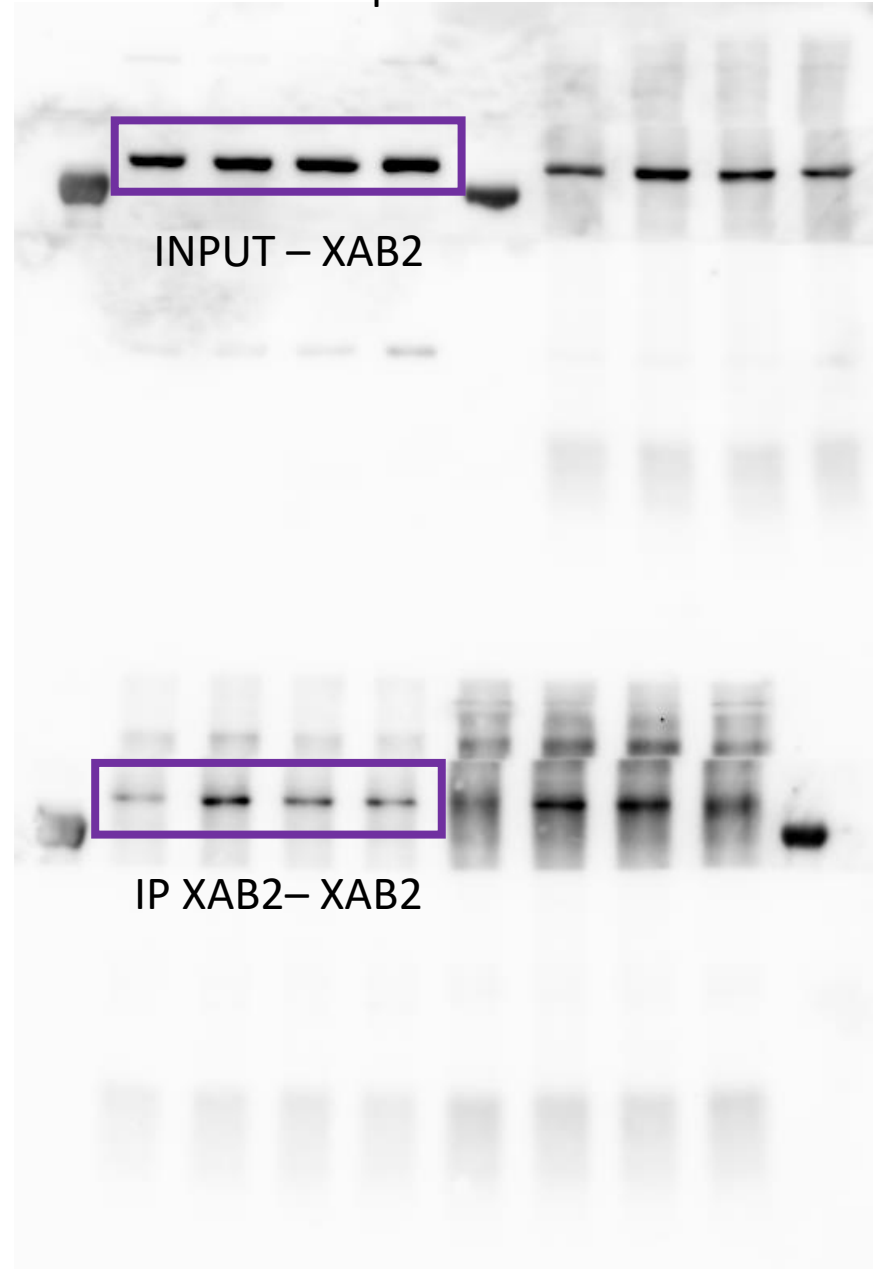

Colorimetric

Figure 5A  
CSA<sup>-/-</sup>

Exposition 60sec

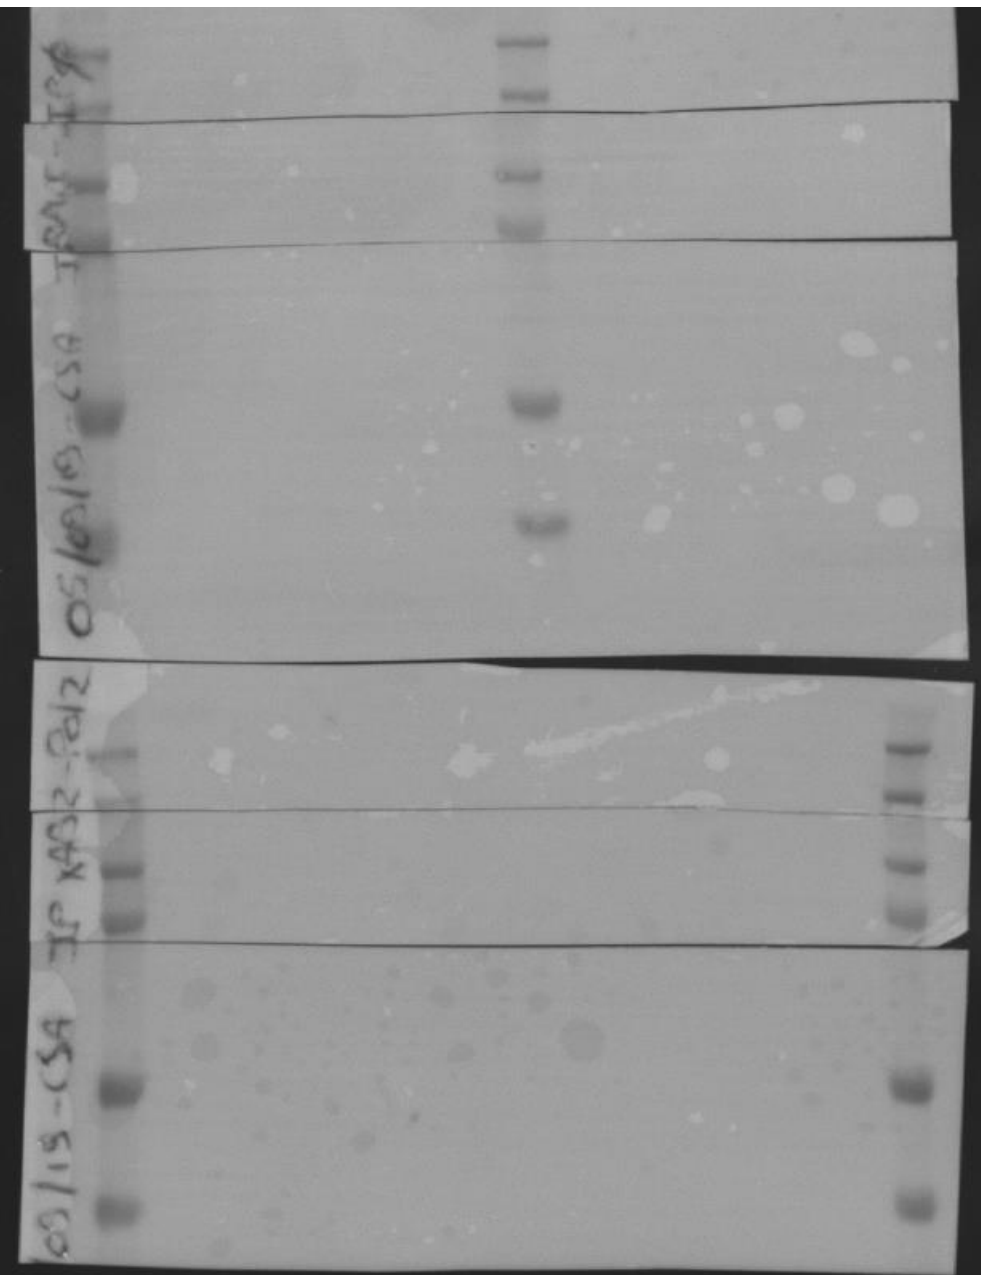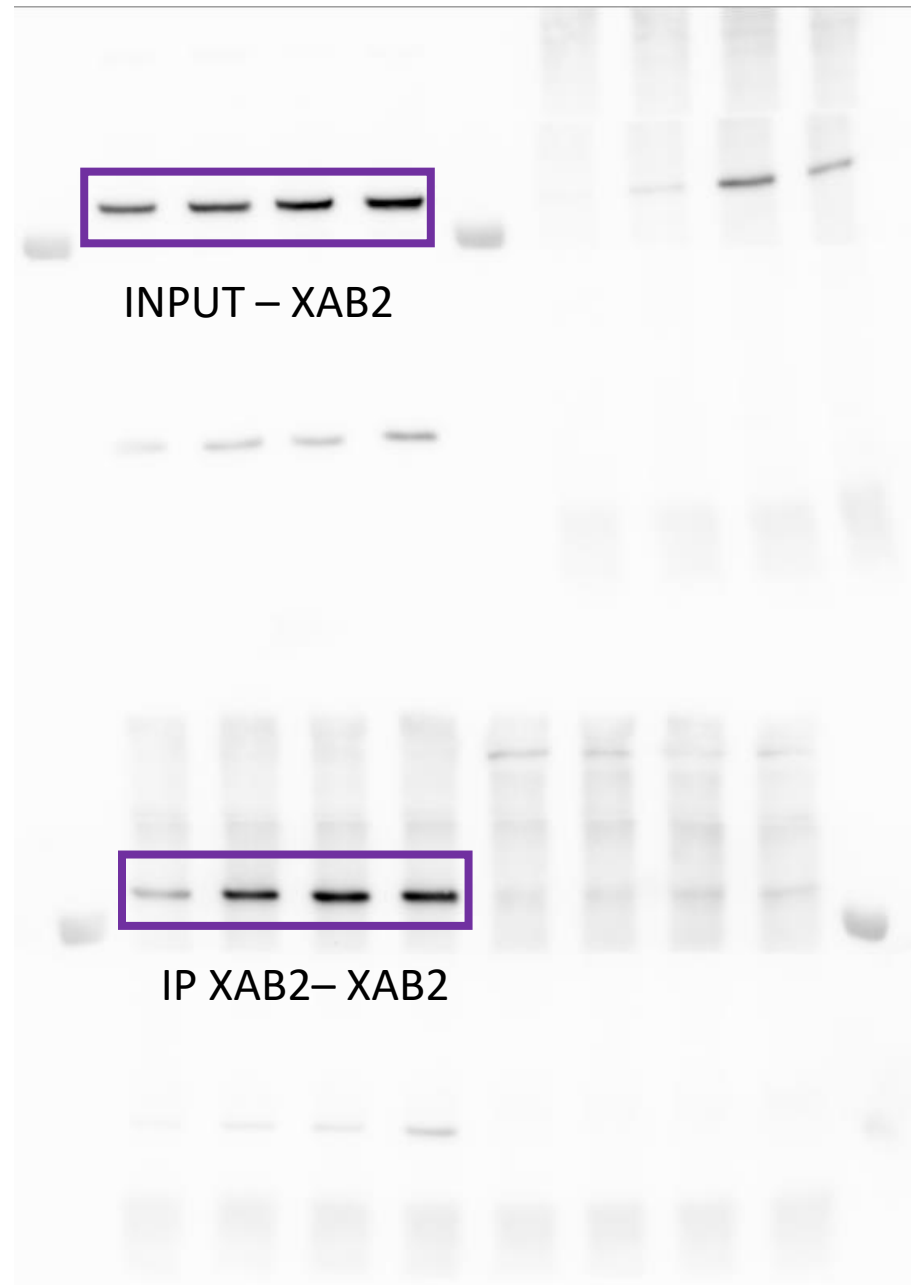

Colorimetric

Figure 5A  
CSB<sup>-/-</sup>

Exposition 60sec

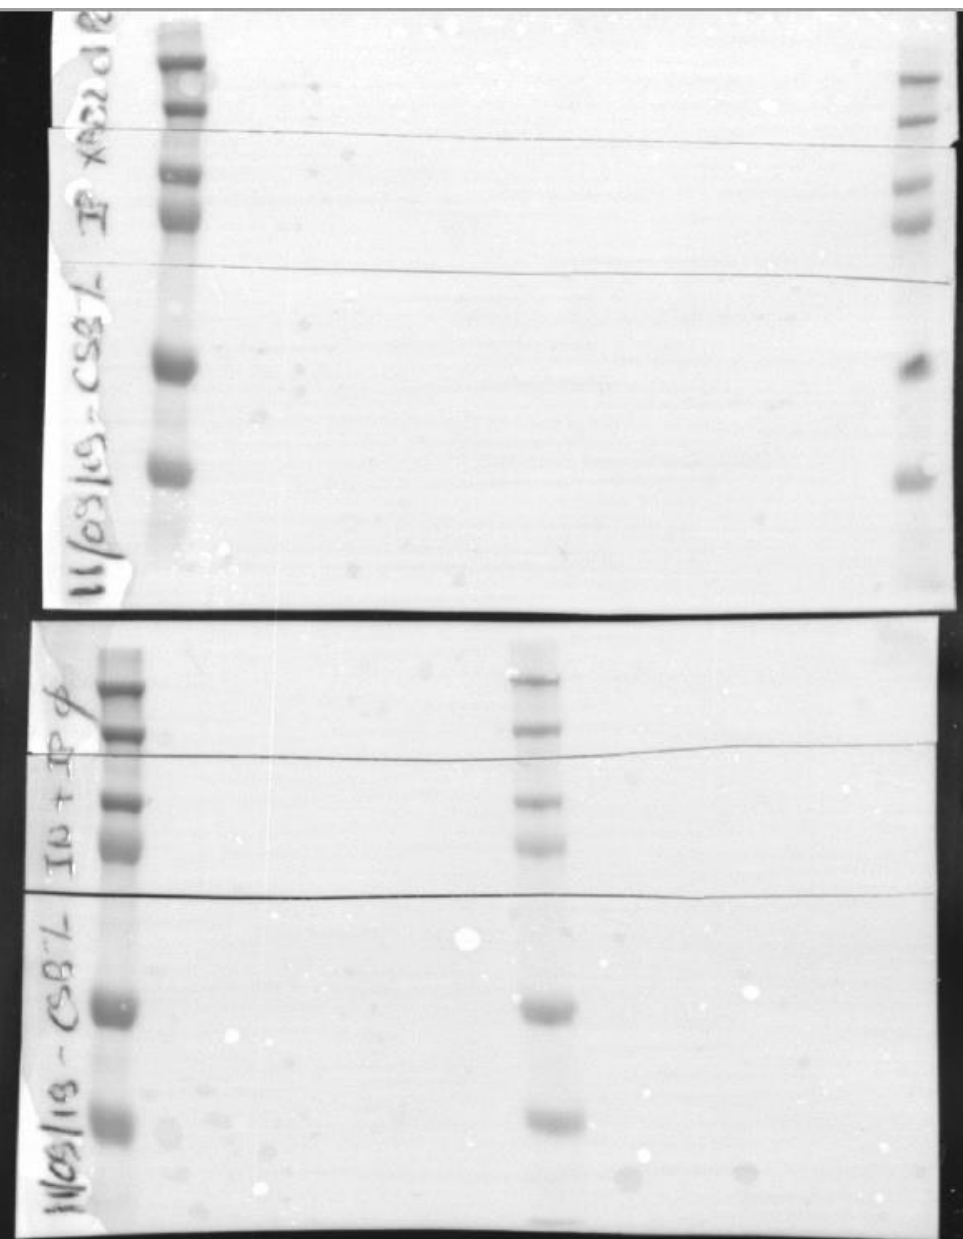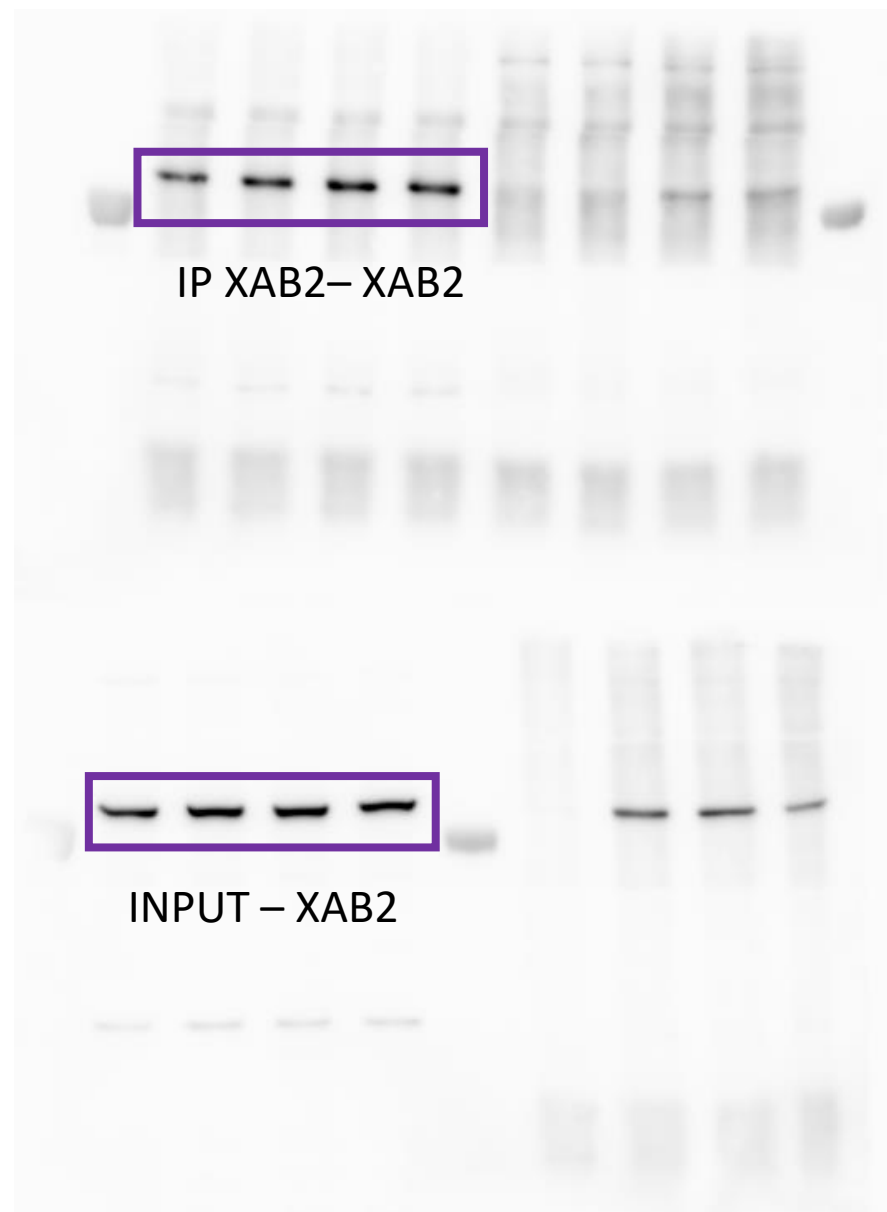

Supplement: fig5-data3 [file elife-77094-fig5-data3-v2.pdf]
