# Supplementary material for: XAB2 dynamics during DNA damage-dependent transcription inhibition
Source: eLife journal article supplement (doi:10.7554/elife.77094), 2022-07-26
Supplement: fig5-data5 [file elife-77094-fig5-data5-v2.pdf]

Figure 5B

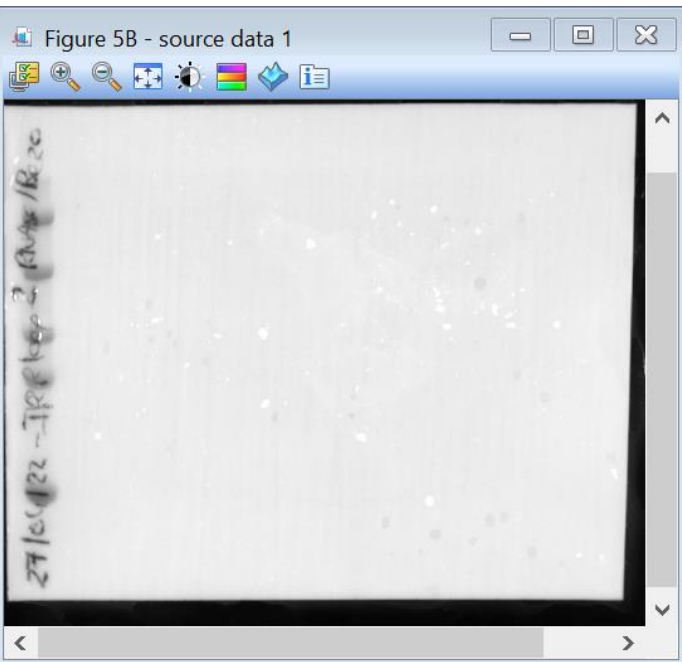

Colorimetric

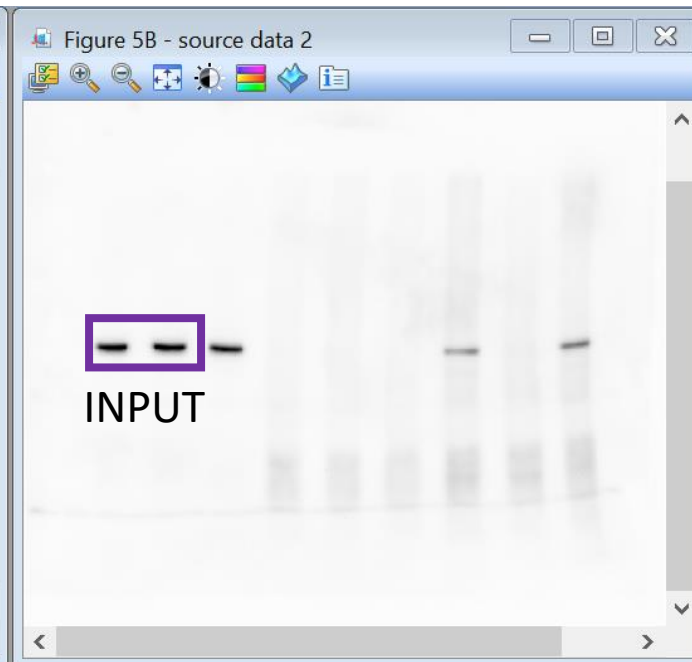

Exposition 60Sec

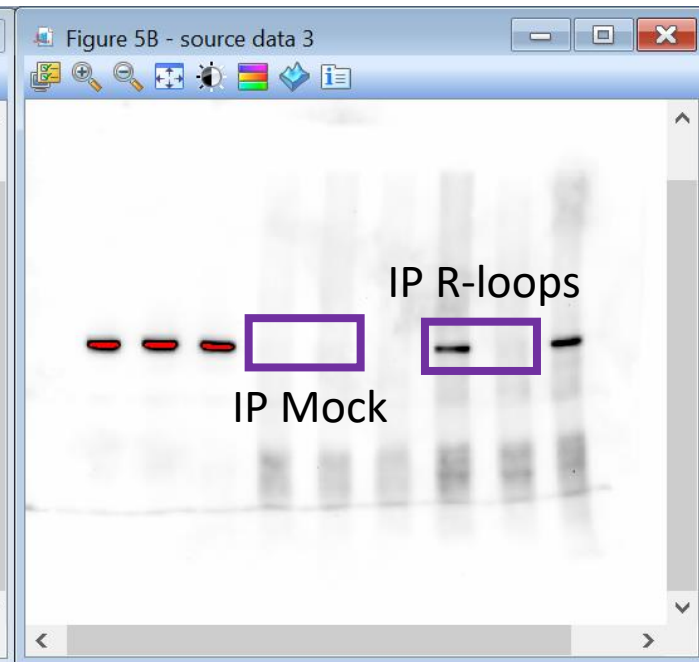

Exposition 180Sec
