# Supplementary material for: XAB2 dynamics during DNA damage-dependent transcription inhibition
Source: eLife journal article supplement (doi:10.7554/elife.77094), 2022-07-26

Figure 5A And Figure 5 – figure supplement 1A

Colorimetric

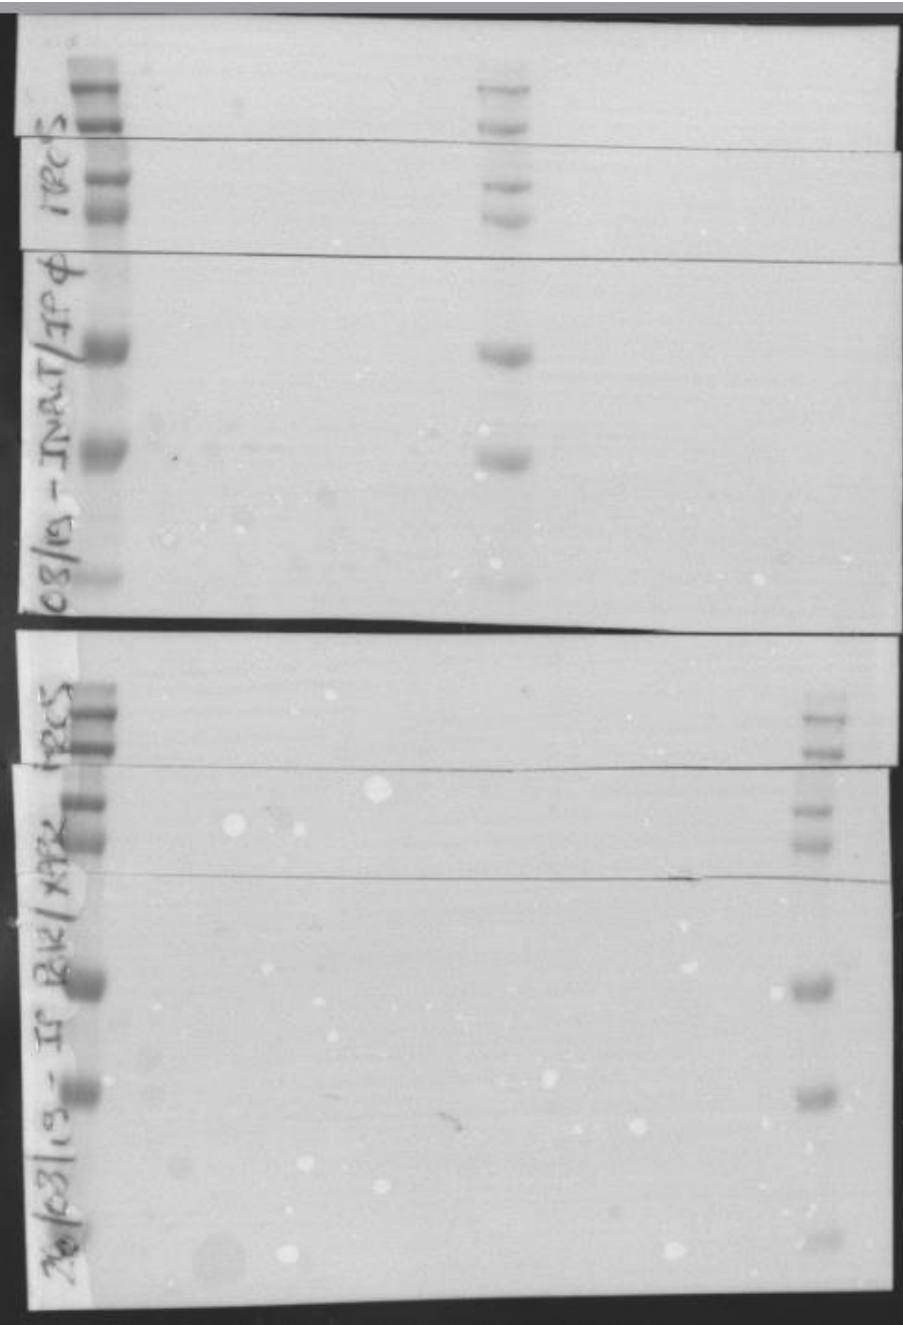

MRC5

Exposition 60sec

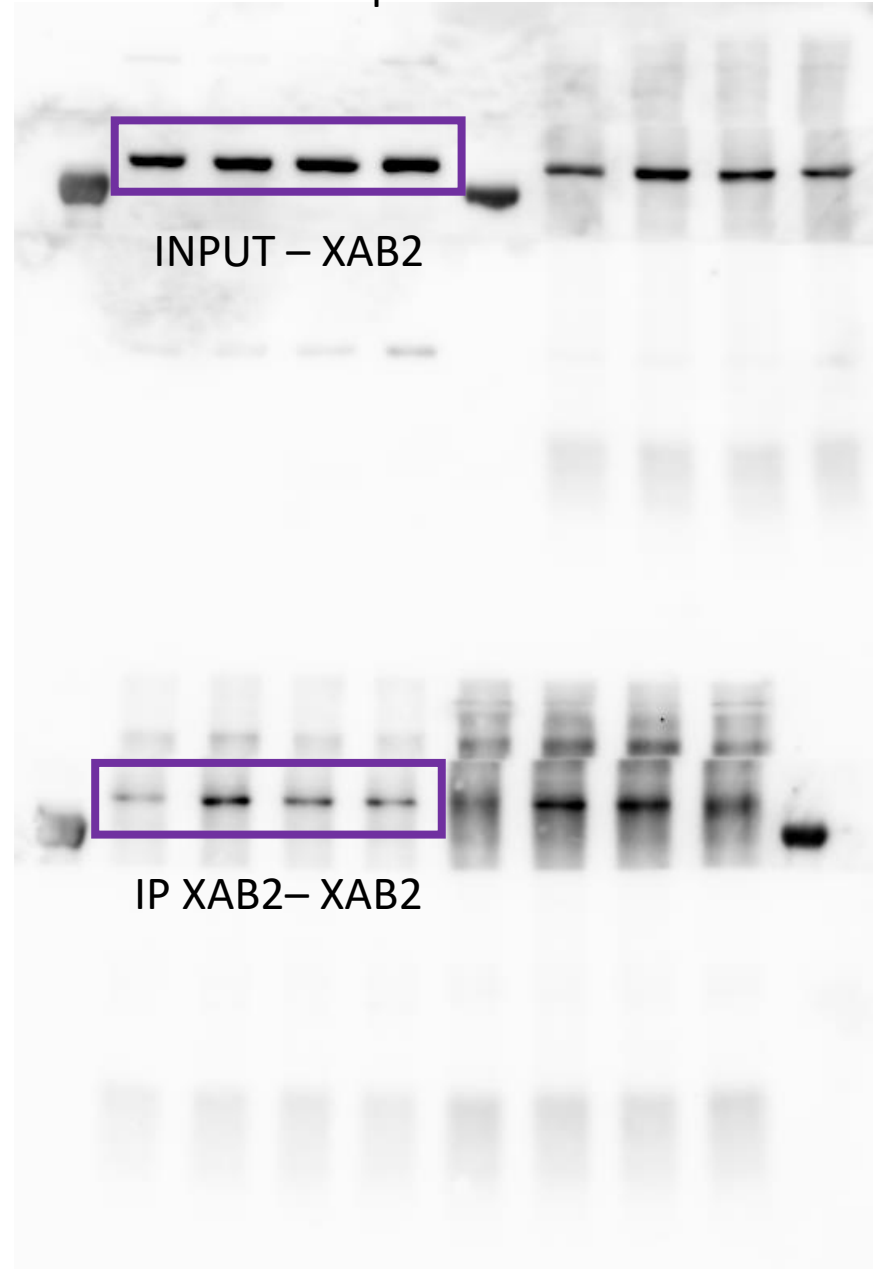

Figure 5 – figure supplement 1A

Colorimetric 2

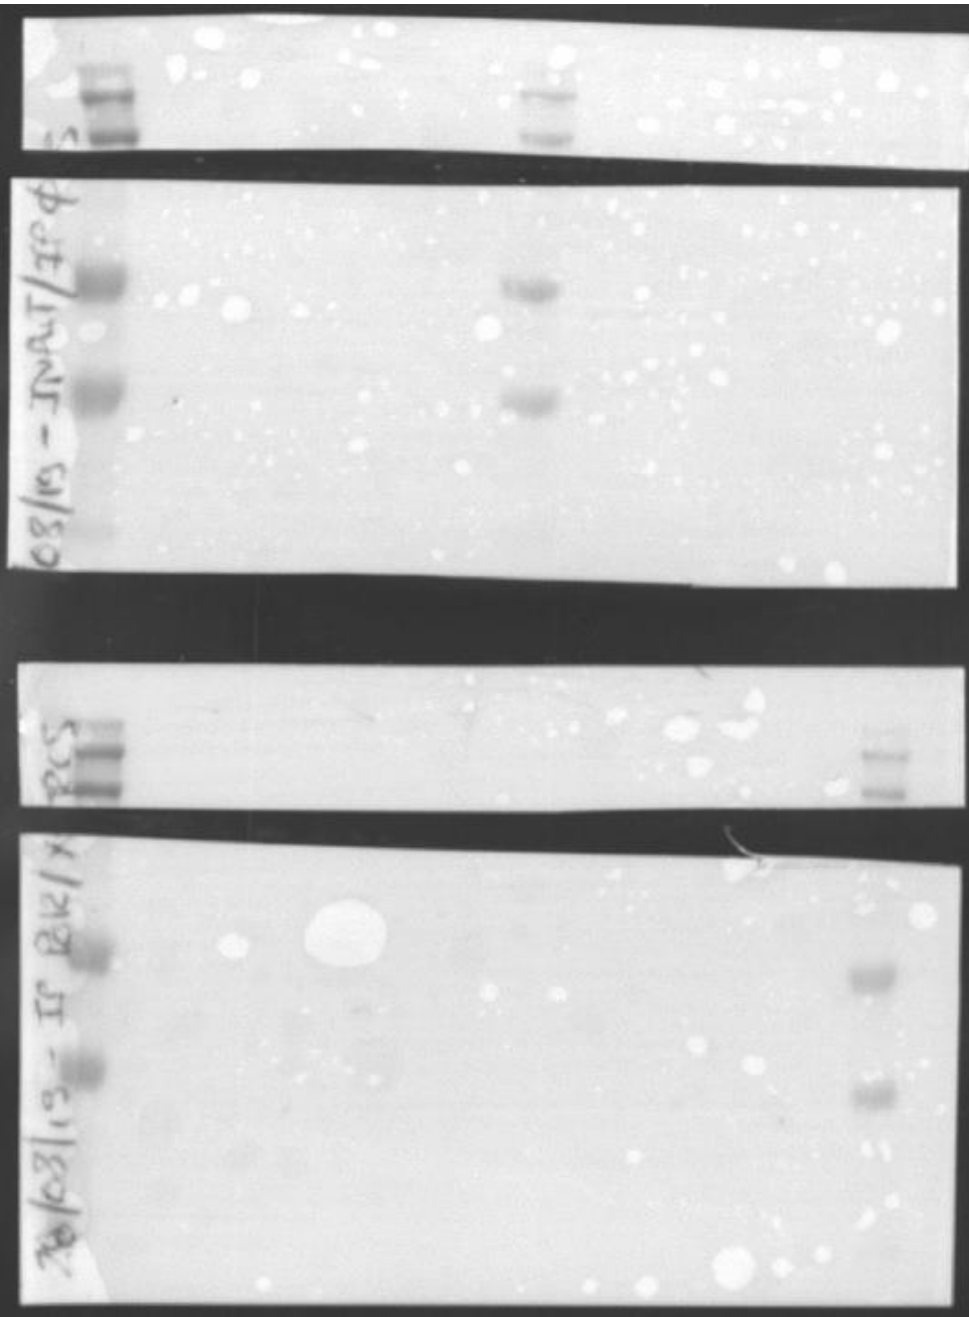

Exposition 1080sec -reblot

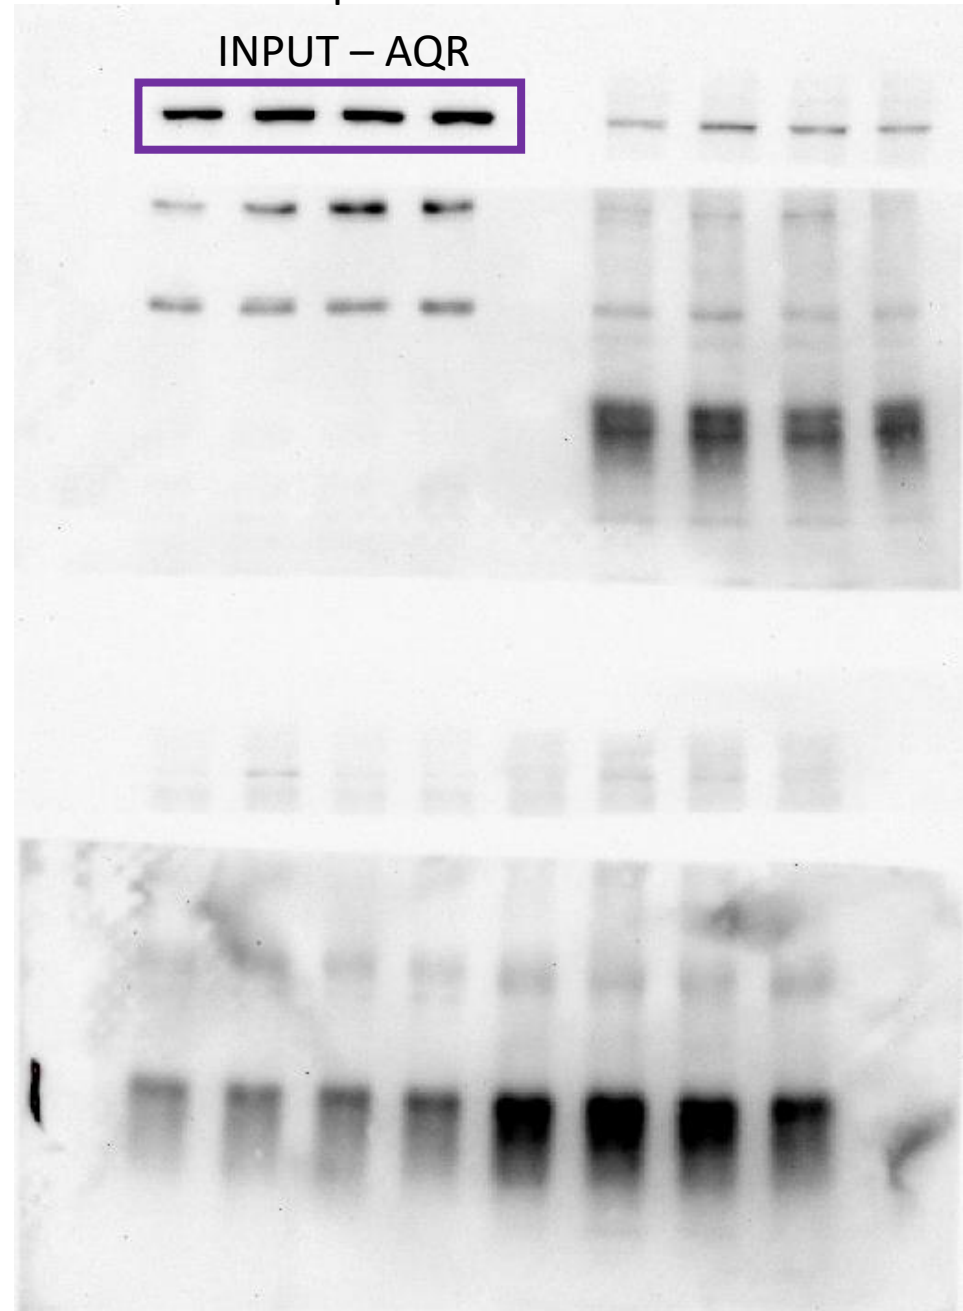

Figure 5 – figure supplement 1A

Colorimetric 3

Exposition 1020sec – reblot - ECL++

IP XAB2 – AQR

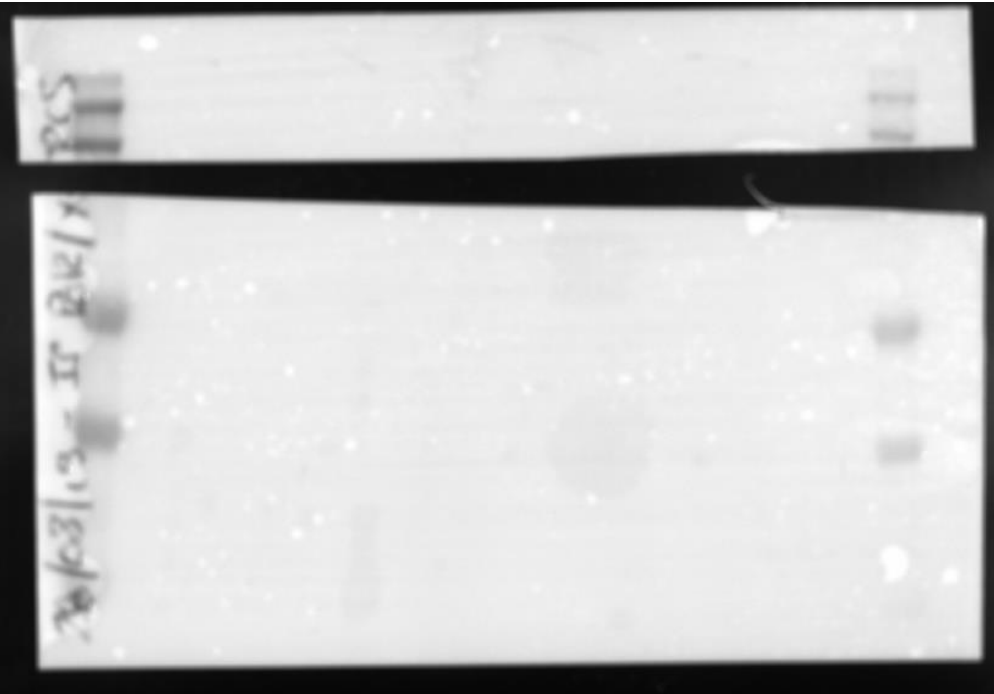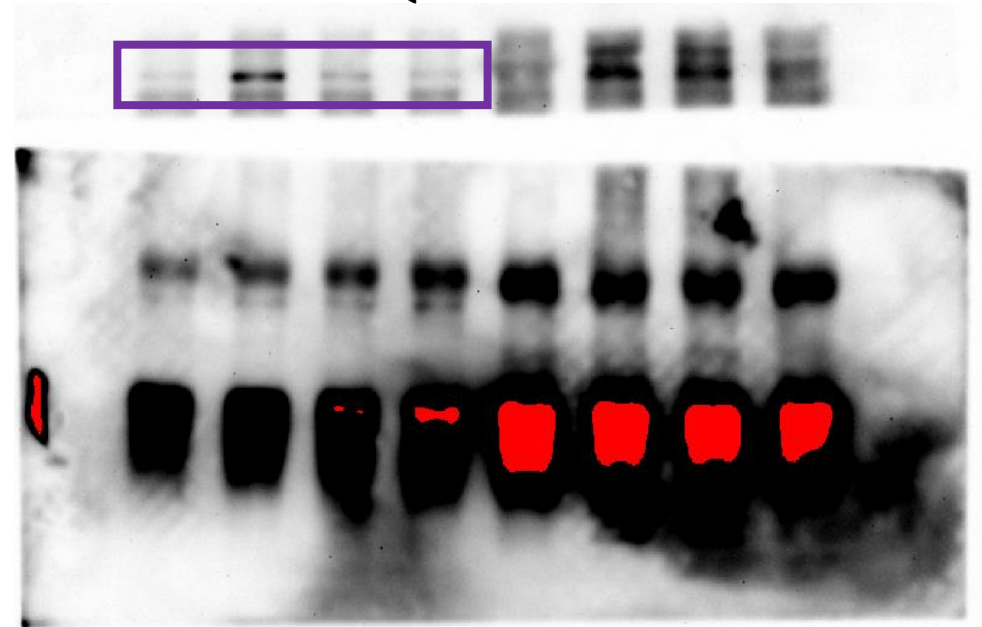

Supplement: fig5-figsupp1-data2 [file elife-77094-fig5-figsupp1-data2-v2.pdf]
