# Supplementary material for: XAB2 dynamics during DNA damage-dependent transcription inhibition
Source: eLife. 2022 Jul 26;11:e77094. doi: 10.7554/eLife.77094 (PMC9436415; doi:10.7554/eLife.77094)
Supplement: Figure 1—figure supplement 2—source data 1. [file elife-77094-fig1-figsupp2-data1.xlsx]

## Sheet: siXPF
	siMock	siXPF		siMock
28.09.2018	2884850	4330281		90.0219	135.127
	2133976	715329		66.5908	22.3219
	2701937	3709990		84.3141	115.77
	2550776	3292715		79.5971	102.749
	2996850	1529870		93.5169	47.7397
	1499008	2028305		46.7766	63.2934
	5155309	3565939		160.872	111.275
	3676500	1879651		114.725	58.6546
	4895418	954192		152.762	29.7756
	6584752	949924		205.478	29.6424
	2149381	4970741		67.0716	155.112
	817807	5000897		25.5197	156.053
	2651045	824713		82.726	25.7352
	2427022	6782947		75.7354	211.662
	4526959	2053840		141.264	64.0902
	4708287	2271878		146.922	70.8941
	4231697	4885416		132.05	152.45
	4635701	1557652		144.657	48.6066
	426776	4899859		13.3176	152.9
	4545223	8279066		141.834	258.349
	2508972	3381684		78.2926	105.526
	6011400	6176786		187.586	192.747
	5625996	4611132		175.56	143.891
	2437471	4412544		76.0614	137.694
	3222975	6410769		100.573	200.048
	1928526	1409810		60.1798	43.9932
	5836333	-722030		182.123	-22.531
	137367	5197752		4.28655	162.196
	1085989	3807364		33.8884	118.809
	2088240	2740967		65.1637	85.532
	2605825	1523522		81.3149	47.5416
	1987961	2777176		62.0344	86.6619
	3593737	4995753		112.143	155.893
	3224957	1674054		100.635	52.239
	3067979	1139473		95.7365	35.5573
	3802907	2935166		118.67	91.592
		7536354			235.172
21.02.2018	72816052	42570548		106.818	62.4492
	40619323	128118446		59.5868	187.944
	47735425	93870015		70.0258	137.703
	46246225	25546311		67.8413	37.4754
	44906734	26061292		65.8763	38.2308
	48188630	25480671		70.6907	37.3791
	55399923	24618365		81.2693	36.1141
	60590654	72846919		88.8839	106.863
	51586433	27211712		75.6751	39.9184
	45650167	91233843		66.9669	133.836
	52344588	48266399		76.7873	70.8048
	60929693	48644291		89.3813	71.3591
	79320577	72182191		116.36	105.888
	50379471	74645279		73.9045	109.501
	88428979	89179193		129.722	130.822
	60025287	82010761		88.0546	120.306
	61288294	112825602		89.9073	165.51
	111835395	100638889		164.058	147.633
	63984183	19867037		93.8621	29.1441
	78321417	23499865		114.894	34.4733
	92921234	38953287		136.312	57.1428
	43031448	43550288		63.1253	63.8864
	44296107	109252315		64.9805	160.269
	82094990	154495933		120.43	226.639
	90082521	43437931		132.147	63.7216
	77951751	57445639		114.352	84.2703
	88514107	46829201		129.846	68.6965
	93790705	70139397		137.587	102.892
	52161954	39432384		76.5194	57.8456
	61581695	79510994		90.3377	116.639
	78437086	54079627		115.064	79.3325
	68666606	99309798		100.731	145.683
	102485549	57381557		150.342	84.1763
	70769755	69785201		103.816	102.372
	72408626	25929001		106.22	38.0367
	66493232	23965356		97.5428	35.1562
	99920659	47017916		146.579	68.9733
	49713532	44640691		72.9276	65.486
	58388134	60797580		85.6529	89.1875
	80219916	63023896		117.679	92.4534
	72108136	44680614		105.78	65.5446
	143107770	121041751		209.933	177.563
	63758576	53311947		93.5311	78.2064
	89109337	53298101		130.72	78.1861
	49870462	80149030		73.1579	117.575
	34437529	61302033		50.5184	89.9275
	27378816	77445750		40.1636	113.61
	54227194	69718306		79.549	102.274
	51069247	108396289		74.9164	159.013
	128820702	35606162		188.975	52.2327
Average	4.09742e+07			100	97.9898
SD	3.68754e+07			41.2384	55.3155
SEM	3.97638e+06			4.44686	5.93044
Average	100
SD	89.9967
SEM	9.70459
t.test					0.786914

## Sheet: siXAB2 1hEU
	siMock	siXAB2		siMock	siXAB2
13.12.2021	14641415	9939405		89.2018	60.5551
	20896415	7258225		127.31	44.2202
	19063090	4357175		116.141	26.5458
	39463368	6772392		240.428	41.2603
	33245120	3798992		202.544	23.1451
	45784937	3949961		278.942	24.0649
	21136700	7560983		128.774	46.0648
	20585447	13310051		125.415	81.0906
	35060116	5881172		213.601	35.8306
	19584142	501038		119.315	3.05254
	21420528	5809089		130.503	35.3915
	32573193	4934915		198.45	30.0656
	27778940	7601238		169.241	46.31
	17187313	11219389		104.713	68.3534
	35196770	6419515		214.434	39.1105
	30936049	9567506		188.476	58.2894
	30392717	11858536		185.166	72.2473
	38633820	10086689		235.374	61.4525
	32385358	6651513		197.306	40.5239
	26250176	9787373		159.927	59.6289
	42455671	4552839		258.658	27.7379
	46649141	4569682		284.207	27.8405
	25729770	10031445		156.757	61.1159
	23284381	5584377		141.858	34.0224
	35521579	3002596		216.413	18.2931
	24588990	8019578		149.807	48.8587
	25184889	10856937		153.437	66.1451
	21319939	5703101		129.89	34.7458
	24040779	5556951		146.467	33.8553
	24439213	17178965		148.894	104.662
	33568024	8771867		204.511	53.442
	39188356	5103920		238.752	31.0953
	38673773	11846151		235.617	72.1719
	21100856	4360381		128.556	26.5653
	13464097	7255505		82.0291	44.2037
	38946501	4712993		237.279	28.7136
	21519673	16109656		131.107	98.147
	27856051	10016656		169.711	61.0258
	14032480	12086402		85.4919	73.6356
	33420966	13708988		203.615	83.5211
	22306149	1033271		135.899	6.29513
	12581278	3591951		76.6506	21.8837
	13798987	7648594		84.0694	46.5985
	11002318	7898849		67.0309	48.1232
	15278908	9458155		93.0857	57.6232
	14821278	7258689		90.2976	44.2231
	5532018	6254437		33.7034	38.1047
	4757700	6285620		28.986	38.2947
	15393375	7571142		93.7831	46.1267
	8253379	12970437		50.2831	79.0215
	6859005	12684385		41.788	77.2787
	6286967	9318636		38.3029	56.7732
	18195716	9044477		110.856	55.1029
	3925720	5611635		23.9172	34.1885
	20814489	8688299		126.811	52.9329
	6797895	13579988		41.4157	82.7351
	7925472	14244537		48.2854	86.7839
	9248114	1316280		56.3435	8.01935
	21084234	13820327		128.454	84.1994
	15291755	13093808		93.164	79.7731
	8625357	10202302		52.5494	62.1568
	4883300	3201408		29.7512	19.5044
	6680783	2017629		40.7022	12.2923
	13652665	5632958		83.1779	34.3184
	5501334	12593947		33.5165	76.7278
	7827361	7004504		47.6877	42.6745
	15466749	5895252		94.2301	35.9164
	7405663	3752230		45.1185	22.8602
	7338930	2421402		44.7119	14.7522
	9208583	4347111		56.1027	26.4845
	8489075	7887927		51.7191	48.0567
	5159192	2968765		31.432	18.087
	7300765	5805971		44.4794	35.3725
	8358854	1254069		50.9257	7.64033
	5284403	5355514		32.1949	32.6281
	7654816	7268654		46.6364	44.2838
	8819507	6874375		53.7322	41.8817
	9634321	9869041		58.6964	60.1265
	13106409	5469747		79.8499	33.3241
	14872484	6745352		90.6096	41.0956
	18995369	5399530		115.728	32.8963
	10600584	8883086		64.5833	54.1196
	16680779	4496334		101.627	27.3936
	12730775			77.5614
	16971412			103.397
	14336821			87.3461
	13965865			85.0861
	7033487			42.851
	11116762			67.7281
	5735361			34.9423
	5155999			31.4126
	4392726			26.7624
	6908946			42.0923
	6891653			41.9869
	11681847			71.1709
	13199542			80.4173
	24071256			146.652
	7476677			45.5511
	4729373			28.8134
	18975942			115.61
	12323605			75.0807
	7566305			46.0972
	2329055			14.1896
	16081816			97.9774
	4382346			26.6991
	4119254			25.0963
	7047158			42.9343
	5711565			34.7973
	6530251			39.7851
	5846834			35.6214
	5720032			34.8489
	620745			3.78185
	7399443			45.0806
	5994009			36.5181
	8261744			50.3341
	10566962			64.3785
	12406122			75.5834
	19612919			119.49
	21723446			132.349
	21135417			128.766
	26441643			161.094
	19699891			120.02
	12858876			78.3418
	9422434			57.4055
	13646851			83.1425
14.01.2022	55487900	39392551		84.2378	59.803
	67946059	36954651		103.151	56.1019
	60209851	25598143		91.4063	38.8613
	65354783	39258726		99.217	59.5998
	21148253	45354909		32.1058	68.8546
	23010430	47281295		34.9328	71.7791
	73785546	45459018		112.016	69.0127
	73026095	18264488		110.863	27.7279
	108731142	17615913		165.068	26.7432
	73179870	21127470		111.096	32.0742
	66841095	27444117		101.473	41.6637
	27154882	32126154		41.2246	48.7717
	37357225	35255375		56.7131	53.5222
	77917366	28288003		118.289	42.9448
	57834158	37529806		87.7997	56.9751
	47183944	23797221		71.6313	36.1273
	85114874	31423328		129.215	47.7047
	70359134	54505854		106.814	82.7469
	96624226	23747407		146.688	36.0516
	87344264	30061186		132.6	45.6368
	36611158	25203059		55.5805	38.2615
	47862549	26730318		72.6615	40.5801
	70888593	33321622		107.618	50.5865
	68431455	26818440		103.888	40.7139
	75003002	53040008		113.864	80.5216
	68872329	66000804		104.557	100.198
	88367139	38266047		134.153	58.0928
	73311601	22226809		111.296	33.7432
	68498612	17261415		103.99	26.2051
	51575717	49653000		78.2986	75.3797
	63426757	57886072		96.29	87.8785
	67458371	47975667		102.411	72.8333
	69865714	39485783		106.065	59.9445
	98066466	25147673		148.878	38.1774
	35934104	35917974		54.5526	54.5281
	33866093	21160765		51.4131	32.1248
	26751434	40952427		40.6121	62.1711
	83056775	39653110		126.091	60.1985
	70531293	34153264		107.076	51.8491
	93321099	81418535		141.673	123.604
	66406169	54208798		100.813	82.296
	81333781	48240483		123.475	73.2353
	76972775	85475500		116.855	129.763
	90047536	36588811		136.704	55.5465
	75350237	62511754		114.391	94.9009
	61952780	63968151		94.0523	97.1119
	54745999	84627815		83.1115	128.476
	44956863	25234327		68.2503	38.309
	41367205	49014076		62.8008	74.4097
	86390022	46401395		131.151	70.4433
	43893142	60042232		66.6355	91.1519
	67166597	69856355		101.968	106.051
	99455583	78437750		150.986	119.079
	100916013	61669777		153.204	93.6227
	46132978	59261164		70.0358	89.9661
	79321334	53016005		120.42	80.4851
	118996250	59723485		180.652	90.668
	47808826	42193834		72.58	64.0557
	24357992	45580918		36.9786	69.1977
	51439345	48887737		78.0916	74.2179
	56491284	52434875		85.7611	79.6029
	44119245	51764469		66.9787	78.5852
	78266874	45345070		118.819	68.8397
	38482549	51349850		58.4215	77.9557
	70529687	55247249		107.073	83.8725
	79881566	42908301		121.271	65.1403
	74958880	9770545		113.797	14.8329
	47636267	49785333		72.318	75.5806
	51238054	80998980		77.786	122.967
	49209845	21144701		74.7069	32.1004
	56048316	38904534		85.0886	59.0621
	76679349	50846002		116.409	77.1908
	56112106	58183317		85.1854	88.3298
	90161108	9668157		136.876	14.6775
	95743459	27133953		145.351	41.1928
	48894741	49060287		74.2285	74.4799
	52271539	3884425		79.355	5.89706
	78666324	14620265		119.426	22.1955
	61435485			93.267
	149150156			226.429
	41904913			63.6171
	77180227			117.17
Average	3.60054e+07	2.43091e+07		100	54.6053
SD	2.93452e+07	2.15787e+07		54.9825	26.4054
SEM	2.03964e+06	1.70064e+06		3.82155	2.08104
Average	100	67.5152
SD	81.5024	59.9318
SEM	5.66481	4.72329
variance	1.1419e+14	4.62747e+14		3008.47	692.915
t.test		2.8006e-05			9.2157e-20

## Sheet: siXAB2 2h EU
	siMock	siXAB2		siMock	siXAB2
25.11.2016	101578628	180618737		78.2497	139.137
	107996318	161883926		83.1935	124.705
	124522759	184205231		95.9244	141.9
	167914202	233027817		129.35	179.51
	115057291	175732786		88.6328	135.373
		155918095			120.109
	121211371	287954305		93.3735	221.822
	125514515	190835560		96.6884	147.008
	207138704	177496972		159.566	136.732
	134596547	152121667		103.685	117.185
	174851411	86657517		134.694	66.7554
	65893313	148494292		50.76	114.391
	100580958	308586436		77.4812	237.715
	151270393	104090721		116.529	80.1848
	185344029	197243764		142.777	151.944
	72840444	142333803		56.1116	109.645
	107181952	82421530		82.5661	63.4923
	191463540	240690598		147.491	185.413
	153849790	241789982		118.516	186.26
	225378459	222600268		173.617	171.477
	130664061	188556560		100.655	145.252
	145409964	194897814		112.015	150.137
	157495680	189873638		121.325	146.267
	83317888	208095532		64.1828	160.304
	72912147	285616600		56.1669	220.021
	160513094	222584456		123.649	171.465
	67516962	187075719		52.0108	144.111
	184014149	77687774		141.753	59.8457
	16465439	184034874		12.6839	141.769
	166102821	350158895		127.955	269.74
	156614101	307582893		120.646	236.942
	154392916	320448294		118.934	246.853
	40721828	265727545		31.3695	204.7
	119162557	152582533		91.7952	117.54
	110766049	178262306		85.3271	137.322
	154075170	87450853		118.69	67.3666
	103785900	364550841		79.95	280.827
	159231922	408117174		122.662	314.387
	142230613	311470215		109.565	239.937
	88294821			68.0167
	157393714			121.246
	133947614			103.185
	151564383			116.756
	128914216			99.3073
	126940186			97.7866
	117372727			90.4165
	99850196			76.9182
	130759182			100.729
	96568649			74.3903
	164259016			126.535
	107688563			82.9564
	107083573			82.4903
	109445395			84.3097
	200452994			154.416
24.02.2017	64207780	221253290		76.189	262.539
	46140188	87338241		54.75	103.636
	60964651	94472538		72.3407	112.101
	132789450	233920306		157.568	277.57
	66290709	225255004		78.6606	267.288
	75064120	188659596		89.0712	223.864
	72374266	166864264		85.8794	198.001
	55090001	236627035		65.3699	280.782
	76970011	119224725		91.3327	141.472
	53478524	149839296		63.4577	177.8
	41585682	350166835		49.3456	415.508
	52024728	96745191		61.7326	114.798
	119841487	85446412		142.204	101.391
	61339037	97154344		72.785	115.283
	116513347	121059624		138.255	143.65
	139761337	167813568		165.841	199.128
	112518860	172006468		133.515	204.103
	111259667	245718021		132.021	291.569
	115474701	180000887		137.022	213.589
	63459783	138102670		75.3015	163.873
	65094432	218897242		77.2411	259.744
	60289508	174027243		71.5396	206.501
	105427540	165586438		125.1	196.485
	82735084	184708954		98.1736	219.176
	95080546	173184589		112.823	205.501
	85753853	139563686		101.756	165.606
	69682887	175429747		82.6858	208.165
	48640694	170814111		57.7171	202.688
	68693072	244379593		81.5113	289.981
	78175464	111315315		92.7631	132.087
	79147903	203344101		93.917	241.288
	67616292	45231097		80.2336	53.6713
	114620079	205762910		136.008	244.159
	51149717	222877161		60.6943	264.466
	44775682	163132509		53.1309	193.573
	57060881	301832166		67.7085	358.154
	60145641	178001642		71.3689	211.217
	98243188	232741913		116.575	276.172
	41476024	188624999		49.2155	223.823
	58508714	229758268		69.4265	272.631
	146335674	122753748		173.642	145.66
	68305607	100083879		81.0515	118.76
	98783081	95240457		117.216	113.012
	95254154	91680306		113.029	108.788
	75918760	181301583		90.0853	215.133
	133624872	179128358		158.559	212.554
	95923856	310597250		113.823	368.555
	127933150	314116157		151.806	372.731
	104029157	234314390		123.441	278.038
	98482659	193239841		116.86	229.299
	113322150	218921023		134.468	259.772
	115513158	124092130		137.068	147.248
	119833679	112040255		142.195	132.947
	119254183	249934588		141.507	296.573
	78361011	151199321		92.9833	179.413
	63720724	102087721		75.6111	121.137
	101026438			119.878
	67408874			79.9875
	79687337			94.5571
Average	1.05824e+08	1.89969e+08		100	189.665
SD	4.1677e+07	7.28709e+07		32.4216	74.5371
SEM	3.93811e+06	7.47639e+06		3.06355	7.64734
Average	100	179.514
SD	39.3833	68.8604
SEM	3.72137	7.06492
variance	1736810468419159	5309221031136299		1046.86	5528.33
t.test		2.96045e-20			8.19576e-24

## Sheet: Feuil4
	1h			2h
	siMock	siXAB2		siMock	siXAB2
Average	100	54.6053		100	189.665
SD	54.9825	26.4054		32.4216	74.5371
SEM	3.82155	2.08104		3.06355	7.64734
