# Supplementary material for: XAB2 dynamics during DNA damage-dependent transcription inhibition
Source: eLife. 2022 Jul 26;11:e77094. doi: 10.7554/eLife.77094 (PMC9436415; doi:10.7554/eLife.77094)
Supplement: Figure 1—source data 1. [file elife-77094-fig1-data1.xlsx]

## Sheet: 25.01.2017
	siMock								siXAB2								siXPF
Paste	Area	Mean	Mix	Max	IntDen	RawIntDen		Paste	Area	Mean	Mix	Max	IntDen	RawIntDen		Paste	Area	Mean	Mix	Max	IntDen	RawIntDen
1	15.467	8335.79	1874	22078	128931	5785037	1.43617	1	20.058	4799.86	557	14531	96276.6	4319870	1.07244	1	8.826	2040.37	277	4523	18007.5	807985	0.200588
2	11.277	2584.69	-285	7816	29148	1307854	0.324683	2	7.176	5130.75	1372	11575	36820.2	1652101	0.410145	2	3.187	4800.11	1893	8213	15298.1	686416	0.170407
3	7.154	9086.43	5067	18998	65005.2	2916744	0.724101	3	8.179	5267.51	1540	13280	43084.5	1933177	0.479924	3	4.658	2706.51	510	4921	12606.8	565661	0.140429
4	14.576	9306.77	4581	17772	135652	6086630	1.51105	4	9.851	5669.03	2957	10750	55844.6	2505713	0.62206	4	13.506	2640.81	1031	5418	35666.4	1600329	0.397292
5	6.24	12910.4	6091	23848	80565.2	3614910	0.897425	5	6.887	13704.2	5719	25788	94375.8	4234583	1.05126	5	5.661	2336.06	718	4188	13224.1	593359	0.147305
6	16.359	8508.17	3648	18360	139182	6244994	1.55036	6	10.118	7960.26	4033	14192	80544	3613960	0.897189	6	8.023	661.147	-324	1771	5304.57	238013	0.0590883
7	5.795	4878.51	1601	12172	28269	1268412	0.314892	7	5.081	23365.1	16198	35048	118728	5327243	1.32252	7	13.194	809.483	-454	2622	10680.2	479214	0.118968
8	9.65	5864.73	3016	10263	56596	2539428	0.630429	8	6.196	4843	1939	9028	30006.1	1346355	0.334241	8	7.444	1273.31	-1348	4029	9478.29	425285	0.10558
9	6.084	16207.1	6149	31843	98609.2	4424536	1.09842	9	5.126	5237.9	3226	8973	26849.4	1204718	0.299079	9	3.499	4624.26	1563	8196	16180.5	726009	0.180236
10	9.94	13660	5107	30991	135780	6092376	1.51247	10	8.536	11312.1	4999	21579	96558.4	4332518	1.07558	10	11.634	1824.46	-96	4576	21225.3	952368	0.236432
	Mean	4.02809e+06	100						Mean	3.04702e+06	75.6443						Mean	707464	17.5633
	SD	1.98032e+06	49.1627						SD	1.48958e+06	36.9797						SD	373171	9.26422
	SEM	626232	15.5466						SEM	471046	11.694						SEM	118007	2.9296

## Sheet: 22.02.2017
	siMock								siXAB2								siXPF
Paste	Area	Mean	Mix	Max	IntDen	RawIntDen		Paste	Area	Mean	Mix	Max	IntDen	RawIntDen		Paste	Area	Mean	Mix	Max	IntDen	RawIntDen
1	6.463	8323	5886	12655	53793.2	2413670	0.751017	2	8.892	8147.96	5223	11976	72455.5	3251035	1.01156	4	14.509	2636.53	1511	4172	38252.9	1716383	0.534055
2	5.928	7807.4	5792	10831	46284.7	2076768	0.646189	3	5.639	9623.92	6512	14798	54265.3	2434853	0.757608	6	3.454	16091.5	13716	19438	55587.5	2494177	0.776067
3	10.542	6658.11	4516	10026	70187.8	3149284	0.979904	4	11.589	8411.53	4886	14983	97482.9	4373996	1.36097	4	6.998	8861.39	5814	13648	62012.8	2782477	0.865772
4	4.859	8478.28	5940	11571	41192.1	1848266	0.575091	5	6.597	15683.5	11218	21182	103463	4642307	1.44446	2	14.174	4170.8	2032	6071	59118.9	2652627	0.825369
5	7.288	7239.38	5522	9974	52759.3	2367278	0.736582	2	6.998	17051.4	12097	24791	119327	5354129	1.66594	3	13.773	3666.41	2105	5656	50498.6	2265839	0.705019
6	5.549	15211.3	12890	23661	84414.1	3787611	1.17852	3	9.895	17476.8	10266	33158	172940	7759694	2.41444	4	13.996	2323.15	1240	3809	32515.2	1458938	0.453951
7	6.931	12579.1	9610	16193	87188.4	3912090	1.21725	5	5.772	9963.08	5965	16675	57510	2580437	0.802907	2	5.839	5625.63	3959	8038	32849	1473916	0.458611
8	6.374	10293.8	7308	14237	65613	2944015	0.916034	6	6.396	8989.47	6112	13561	57499.7	2579978	0.802764	3	8.224	5824.31	3997	9551	47898.4	2149172	0.668718
9	4.569	11138.5	8868	23749	50889.8	2283396	0.710482	7	2.117	9135.06	7950	12268	19341.3	867831	0.270027	4	11.879	3562.05	1751	5457	42313.3	1898573	0.590744
10	7.332	7682.72	6121	10187	56332.8	2527616	0.786471	8	4.792	13474.1	8139	23600	64563.9	2896941	0.901387	5	6.552	4062.06	3123	5455	26616.1	1194246	0.371591
11	7.956	8137.87	5896	10667	64748.4	2905221	0.903964	9	4.435	12450.7	9394	18738	55220.2	2477697	0.770939	8	8.491	1614.16	761	2527	13706.3	614994	0.191356
12	11.032	9964.99	7360	13893	109934	4932668	1.53481	4	5.327	22762.1	17247	29459	121244	5440142	1.69271	1	9.65	7324.22	5282	10864	70680.4	3171386	0.986781
13	18.654	6022.1	3667	9048	112337	5040495	1.56836	5	4.524	16379.8	11762	23314	74106.1	3325094	1.03461	2	6.619	5015.31	3626	6787	33197.4	1489548	0.463475
14	8.402	8900.72	5882	12643	74785.3	3355572	1.04409	2	8.692	14421.6	10352	18697	125351	5624419	1.75005	3	6.307	5253.06	3863	6874	33132.1	1486617	0.462563
15	9.026	11516.3	7180	17318	103948	4664097	1.45124	3	2.83	11359.7	8900	14968	32153	1442684	0.448893	4	4.391	6314.57	4990	8163	27724.3	1243971	0.387063
								4	5.906	10533.3	8023	14388	62209.7	2791313	0.868521	2	6.842	6097.64	4176	9379	41720.5	1871974	0.582467
								5	9.361	11212.5	7272	16713	104954	4709231	1.46528	3	7.578	4384.32	2736	6860	33222.4	1490669	0.463824
	Mean	3.21387e+06	100						Mean	3.67952e+06	114.489						Mean	1.85032e+06	57.5731
	SD	1.04385e+06	32.4795						SD	1.74704e+06	54.3593						SD	659823	20.5305
	SEM	269520	8.38616						SEM	423719	13.1841						SEM	160030	4.97937

## Sheet: Average
	siMock	siXAB2	siXPF
25.01.2017	5785037	4319870	807985
	1307854	1652101	686416
	2916744	1933177	565661
	6086630	2505713	1600329
	3614910	4234583	593359
	6244994	3613960	238013
	1268412	5327243	479214
	2539428	1346355	425285
	4424536	1204718	726009
	6092376	4332518	952368
22.02.2017	2413670	3251035	1716383
	2076768	2434853	2494177
	3149284	4373996	2782477
	1848266	4642307	2652627
	2367278	5354129	2265839
	3787611	7759694	1458938
	3912090	2580437	1473916
	2944015	2579978	2149172
	2283396	867831	1898573
	2527616	2896941	1194246
	2905221	2477697	614994
	4932668	5440142	3171386
	5040495	3325094	1489548
	3355572	5624419	1486617
	4664097	1442684	1243971
		2791313	1871974
		4709231	1490669
Mean	3.53956e+06	3.44526e+06	1.42704e+06
SD	1.50731e+06	1.65625e+06	795249
SEM	301461	318746	153046
	100	97.3359	40.317
	42.5846	46.7927	22.4675
	8.51692	9.00526	4.32386
Variance	2.27197e+12	2.74318e+12	6.32421e+11
p-value		0.830689	3.32535e-07
