# Supplementary material for: XAB2 dynamics during DNA damage-dependent transcription inhibition
Source: eLife. 2022 Jul 26;11:e77094. doi: 10.7554/eLife.77094 (PMC9436415; doi:10.7554/eLife.77094)
Supplement: Figure 1—source data 2. [file elife-77094-fig1-data2.xlsx]

## Sheet: RECAP
	No UV	0h UV	3h UV	16h UV	24h UV
siMock	100	1.17502	8.90733	46.1292	101.956
	33.0371	0.666085	5.36368	47.6679	37.5777
	4.30107	0.0796123	0.660224	6.61035	5.21109
	No UV	0h UV	3h UV	16h UV	24h UV
siXAB2	100	12.9624	7.60566	6.59325	5.49057
	36.5755	4.49764	2.54358	5.27442	4.82048
	4.88761	0.606462	0.336906	0.692566	0.644164
	No UV	0h	3h	16h	24h
siXPF	100	27.9584	15.2174	20.96	16.7577
	64.7356	14.3492	9.49878	13.9674	6.92026
	8.89213	1.83723	1.22629	1.83401	1.04327

## Sheet: siMock
No UV						UV						3h post UV						16h post UV						24h post UV
	Area	Mean	IntDen	RawIntDen			Area	Mean	IntDen	RawIntDen			Area	Mean	IntDen	RawIntDen			Area	Mean	IntDen	RawIntDen			Area	Mean	IntDen	RawIntDen
1	210.723	6790.88	1.43099e+06	64207780		2	122.779	39.42	4839.89	217163		1	138.602	1175.11	162873	7308012		1	167.33	4387.28	734125	32939735		1	200.248	12417.4	2.48656e+06	111570292
2	198.153	5189.54	1.02832e+06	46140188		3	106.353	65.784	6996.37	313923		2	142.057	1115.42	158453	7109670		2	105.529	4328.1	456738	20493574		2	205.73	11367.4	2.33863e+06	104932835
3	200.404	6779.88	1.35871e+06	60964651		4	148.832	113.36	16871.6	757019		3	134.613	1201.1	161684	7254663		3	119.369	1722.7	205636	9226758		3	245.958	9251.61	2.27551e+06	102100744
4	242.905	12183.6	2.95947e+06	132789450		5	115.067	96.03	11049.9	495803		4	217.387	1671.13	363281	16300183		4	101.673	1245.55	126639	5682205		4	161.758	12202.5	1.97386e+06	88566070
5	195.367	7562.25	1.47742e+06	66290709		6	73.034	154.38	11275	505903		5	204.817	2342.18	479718	21524646		5	137.131	929.74	127497	5720693		5	179.098	9222.36	1.6517e+06	74110927
6	222.134	7531.27	1.67295e+06	75064120		7	60.866	191.692	11667.4	523510		6	156.365	1828.68	285942	12830051		6	145.177	785.517	114039	5116860		6	201.697	17102.5	3.44951e+06	154777546
7	135.705	11886.1	1.613e+06	72374266		8	98.196	108.767	10680.5	479228		7	205.218	997.795	204765	9187693		7	153.468	876.958	134585	6038736		7	233.188	13273.8	3.0953e+06	138884225
8	174.885	7020.52	1.22779e+06	55090001		9	112.46	89.802	10099.2	453143		8	153.824	812.184	124934	5605694		8	131.493	1589.47	209004	9377877		8	214.177	10259.5	2.19734e+06	98593439
9	205.864	8332.79	1.71542e+06	76970011		10	70.003	180.736	12652.1	567692		9	154.716	1133.83	175421	7871043		1	125.743	8849.15	1.11272e+06	49926901		1	125.698	11689.8	1.46939e+06	65930409
10	168.199	7086.06	1.19187e+06	53478524		11	113.128	131.363	14860.9	666799		10	175.576	1647.99	289348	12982851		2	91.8	8665.08	795452	35691452		2	189.974	20236.9	3.84447e+06	172499015
11	167.553	5531.48	926816	41585682		12	108.983	141.009	15367.6	689534		11	168.511	1057.34	178174	7994577		3	139.828	5316.67	743419	33356770		3	120.126	15732.6	1.8899e+06	84798595
12	163.207	7104.29	1.15947e+06	52024728		13	144.575	201.788	29173.6	1309000		12	167.865	1791.52	300733	13493715		4	118.031	2022.15	238677	10709301		4	164.099	9917.97	1.62752e+06	73026024
13	221.844	12039.5	2.6709e+06	119841487		14	66.304	235.258	15598.4	699892		13	189.26	2877.07	544516	24432110		1	137.934	3601.34	496746	22288669		5	169.381	14829.2	2.51177e+06	112701793
14	151.997	8993.99	1.36706e+06	61339037		15	129.621	221.01	28647.5	1285397		14	144.508	1140.01	164741	7391811		2	143.929	2933.33	422191	18943454		6	137.555	2509.7	345221	15489859
15	210.21	12353	2.59672e+06	116513347		16	103.188	207.772	21439.6	961983		15	183.444	950.988	174453	7827584		3	166.595	8921.25	1.48623e+06	66686377		7	222.891	15550.1	3.46598e+06	155516457
16	261.693	11902.7	3.11485e+06	139761337		17	184.848	166.451	30768	1380542		16	180.056	1130.93	203631	9136804		4	191.289	2712.93	518952	23285076		1	184.179	9908.56	1.82495e+06	81884334
17	222.869	11251.9	2.5077e+06	112518860		18	114.376	124.716	14264.5	640040		17	183.31	1608.91	294930	13233321		5	164.812	2607.2	429697	19280245		2	163.207	11638	1.8994e+06	85224820
18	219.259	11309.2	2.47963e+06	111259667		19	123.425	121.782	15031	674430		18	142.681	1217.52	173716	7794528		6	208.316	7327.92	1.52652e+06	68494029		3	177.404	7856.84	1.39383e+06	62540482
19	204.037	12613.3	2.57357e+06	115474701		20	137.555	84.034	11559.2	518655		19	167.04	1416.43	236601	10616147		1	122.957	7531.92	926101	41553584		4	127.905	16851.2	2.15535e+06	96709119
20	147.562	9584.62	1.41432e+06	63459783		22	144.687	6.24	902.865	40511		20	195.256	954.151	186303	8359318		2	126.835	11235.1	1.425e+06	63938674		5	138.669	7596.34	1.05338e+06	47264411
21	167.776	8646.98	1.45075e+06	65094432		23	165.547	127.497	21106.8	947050		1	199.847	604.451	120798	5420114		3	130.824	2827.18	369864	16595552		6	166.461	9714.28	1.61705e+06	72555928
22	140.72	9548.54	1.34367e+06	60289508		24	138.669	83.126	11527.1	517213		2	166.394	455.946	75866.8	3404095		1	152.844	2370.23	362275	16255035		7	121.196	7806	946058	42449050
23	246.203	9543.55	2.34965e+06	105427540		25	95.967	158.313	15192.9	681695		3	208.739	1365.62	285058	12790356		2	142.057	20450.7	2.90515e+06	130352455		8	167.375	10081.3	1.68736e+06	75710734
24	233.277	7904.37	1.84391e+06	82735084		26	77.826	242.019	18835.4	845131		4	88.256	2065.59	182301	8179742		3	145.065	2238.64	324750	14571342		9	128.662	10230.4	1.31626e+06	59059817
1	262.451	8074.1	2.11905e+06	95080546		27	144.843	179.429	25989	1166112		5	160.577	1016.41	163212	7323244		1	207.647	19838.7	4.11945e+06	184837025		10	152.086	8744.73	1.32995e+06	59674000
2	237.623	8042.94	1.91119e+06	85753853		28	110.565	253.105	27984.6	1255653		6	162.405	1733.03	281452	12628586		2	156.008	2895	451644	20265001		11	198.576	9640.24	1.91432e+06	85894548
3	236.264	6573.24	1.55302e+06	69682887		29	135.594	258.435	35042.2	1572321		7	95.143	1560.78	148497	6662977		3	132.273	14311.6	1.89303e+06	84939248		12	132.362	9772.71	1.29354e+06	58040148
4	171.765	6311.24	1.08405e+06	48640694		30	121.018	263.486	31886.5	1430727		8	106.598	1921.3	204807	9189552		1	198.688	10009.9	1.98884e+06	89237874		13	142.614	8063.8	1.15001e+06	51600227
5	199.646	7668.35	1.53096e+06	68693072		4	135.794	54.187	7358.22	330159		9	128.662	1145.53	147386	6613130		2	119.101	2724.56	324499	14560068		14	172.79	8865.75	1.53192e+06	68736165
6	229.02	7607.58	1.74229e+06	78175464		5	147.071	61.458	9038.68	405560		10	178.117	1692.43	301450	13525895		3	222.245	2758.1	612975	27503812		15	213.33	9673.92	2.06374e+06	92598812
7	176.178	10012.4	1.76396e+06	79147903		6	124.227	142.573	17711.4	794700		11	143.84	1161.13	167017	7493961		4	96.97	7501.57	727430	32639336		1	163.987	11292.3	1.85179e+06	83088841
8	211.168	7136.28	1.50696e+06	67616292		7	97.951	174.424	17085	766592		12	146.024	1465.29	213967	9600583		1	137.599	4359.04	599801	26912702		2	144.018	19445.3	2.80047e+06	125655223
9	220.596	11580.1	2.55453e+06	114620079		8	142.547	152.5	21738.4	975390		13	115.067	937.34	107857	4839488		2	113.975	14025.8	1.59859e+06	71727790		3	177.136	17324.5	3.06879e+06	137694860
10	132.473	8605.27	1.13997e+06	51149717		10	123.492	106.591	13163.1	590620		14	120.884	1146.19	138556	6216922		3	182.931	1595.51	291869	13095967		4	143.996	10831.5	1.55968e+06	69982057
11	184.09	5420.78	997912	44775682		11	107.066	214.492	22964.8	1030418		15	133.253	877.662	116951	5247539		4	146.848	6184.88	908241	40752203		5	161.491	10739.2	1.73428e+06	77816005
12	181.17	7019.42	1.27171e+06	57060881		12	138.647	179.603	24901.3	1117308		16	145.355	1155.06	167894	7533320		1	155.451	18313.5	2.84686e+06	127736793		6	129.108	8440.38	1.08972e+06	48895144
13	195.969	6840.17	1.34046e+06	60145641		13	165.525	303.376	50216.3	2253174		17	88.033	2676.93	235659	10573861		2	138.669	12527.6	1.73719e+06	77946827		7	182.374	9440.76	1.72175e+06	77253727
14	225.388	9714.54	2.18954e+06	98243188		14	112.103	354.417	39731.2	1782716		18	133.476	1068.41	142607	6398707		3	101.606	4736.13	481220	21592025		8	184.045	7731.95	1.42303e+06	63850441
15	151.328	6108.4	924372	41476024		15	86.562	345.015	29865.3	1340037		19	163.296	965.054	157590	7070951		4	199.468	1918.57	382693	17171212		9	219.348	12228	2.68219e+06	120348121
16	156.075	8354.81	1.30398e+06	58508714		16	105.707	198.894	21024.5	943356		20	127.994	1082.04	138494	6214162		5	129.264	2126.11	274829	12331427		10	186.809	12115.4	2.26326e+06	101551189
1	202.142	16134	3.26137e+06	146335674		17	128.974	267.469	34496.7	1547844		21	131.181	1123.44	147374	6612567		1	108.872	2929.2	318906	14309130		11	194.921	12629	2.46166e+06	110453128
2	208.093	7315.58	1.52232e+06	68305607		18	101.695	276.822	28151.5	1263140		22	195.701	1751.27	342726	15377908		2	161.803	8478.3	1.37181e+06	61552436		12	139.315	8507.11	1.18517e+06	53177958
3	255.898	8603.3	2.20157e+06	98783081		19	76.489	310.446	23745.6	1065450		1	179.432	754.005	135292	6070491		3	140.452	2463.77	346042	15526694		13	137.889	7409.94	1.02175e+06	45845280
4	250.951	8459.52	2.12292e+06	95254154		20	171.275	262.496	44959	2017281		2	107.245	2124.51	227842	10223150		1	111.189	7089.53	788281	35369664		1	169.648	13209.8	2.24102e+06	100553193
5	250.059	6766.38	1.69199e+06	75918760		21	172.701	268.278	46331.9	2078886		3	180.725	623.522	112686	5056136		2	170.695	21732.7	3.70967e+06	166450526		2	196.972	11342.9	2.23423e+06	100248350
6	213.865	13925.1	2.97809e+06	133624872		22	113.641	199.15	22631.6	1015467		4	148.654	361.628	53757.4	2412062		3	132.028	2268.47	299501	13438418		3	129.71	11320.4	1.46836e+06	65884504
7	228.887	9340.2	2.13785e+06	95923856		23	84.378	228.799	19305.6	866232		5	164.567	448.425	73795.7	3311169		4	187.321	2507.37	469685	21074457		4	208.628	11055.6	2.30651e+06	103491809
8	188.391	15134.6	2.85123e+06	127933150		1	142.057	37.921	5386.92	241708		6	140.408	1107.22	155462	6975491		1	140.898	1271.73	179184	8039884		5	184.134	10391.5	1.91343e+06	85854378
9	227.438	10193.9	2.31849e+06	104029157		2	156.187	127.042	19842.2	890309		7	128.15	778.036	99705.1	4473705		2	248.343	4066.85	1.00997e+06	45316886		6	173.905	10047	1.74722e+06	78396874
10	201.295	10903.7	2.19487e+06	98482659		3	182.463	65.266	11908.6	534331		8	134.323	1414.83	190044	8527168		3	136.797	3051.4	417423	18729516		7	77.848	9536.82	742424	33312117
11	240.966	10481.1	2.5256e+06	113322150		4	76.6	175.922	13475.6	604644		9	118.7	743.465	88249.4	3959695		4	161.157	2772.61	446825	20048778		8	187.054	11581.2	2.16631e+06	97201172
12	208.204	12364.9	2.57443e+06	115513158		5	83.175	174.52	14515.7	651310		10	127.414	893.467	113840	5107951		5	154.783	1709.29	264568	11871021		9	186.163	11252.1	2.09472e+06	93988659
13	287.724	9282.24	2.67072e+06	119833679		6	113.797	265.6	30224.4	1356152		11	157.011	776.125	121860	5467801
14	307.426	8645.37	2.65781e+06	119254183		7	78.472	119.452	9373.67	420591		12	128.328	784.725	100702	4518448
15	195.724	8922.91	1.74642e+06	78361011		8	133.32	146.189	19489.9	874502		13	103.924	720.108	74836.4	3357865
16	173.013	8208.26	1.42014e+06	63720724		9	79.341	175.846	13951.9	626012		14	142.77	682.119	97386.1	4369653
17	218.1	10323.6	2.25157e+06	101026438		10	94.274	219.118	20657	926869		15	119.77	785.431	94070.9	4220904
18	185.739	8088.42	1.50234e+06	67408874		11	122.6	238.951	29295.5	1314471		16	148.631	866.511	128791	5778759
19	187.544	9469.68	1.77598e+06	79687337		12	109.072	211.638	23083.8	1035756		17	163.586	178.428	29188.3	1309659
						13	73.413	221.927	16292.3	731026		18	133.187	165.958	22103.4	991765
						14	79.341	268.16	21276.2	954648		19	183.065	412.467	75508.2	3388005
						15	66.682	325.237	21687.6	973109		20	208.271	349.979	72890.5	3270554
						16	181.638	319.368	58009.4	2602847		21	134.858	316.786	42721.1	1916871
						17	181.349	356.979	64737.7	2904742		22	121.018	202.922	24557.2	1101866
						18	100.826	340.619	34343.3	1540961		23	117.363	47.151	5533.8	248298
						19	130.401	361.132	47091.8	2112982		24	204.616	240.199	49148.5	2205265
						20	118.722	233.868	27765.3	1245814
						21	119.636	164.873	19724.8	885039
						22	160.176	78.19	12524.1	561949
						24	99.979	344.796	34472.4	1546756
		No UV	0h UV	3h UV	16h UV	24h UV
	Average	84274306	990242	7.50659e+06	3.8875e+07	8.59228e+07
	SD	2.78418e+07	561338	4.52021e+06	4.01718e+07	3.16684e+07
	SEM	3.6247e+06	67092.7	556399	5.57083e+06	4.39161e+06
	Percentage	100	1.17502	8.90733	46.1292	101.956
	SD	33.0371	0.666085	5.36368	47.6679	37.5777
	SEM	4.30107	0.0796123	0.660224	6.61035	5.21109

## Sheet: siXAB2
No UV						UV						3h post UV						16h post UV						24h post UV
	Area	Mean	IntDen	RawIntDen			Area	Mean	IntDen	RawIntDen			Area	Mean	IntDen	RawIntDen			Area	Mean	IntDen	RawIntDen			Area	Mean	IntDen	RawIntDen
1	189.283	26051.3	4.93105e+06	221253290		1	133.788	2331.62	311944	13996733		1	188.993	1710.05	323186	14501180		1	167.731	2406.02	403564	18107685		1	211.859	1047.52	221928	9957757
2	310.858	6261.7	1.9465e+06	87338241		2	190.397	2467.7	469843	21081567		2	278.453	1129.12	314406	14107213		2	189.572	1344.31	254845	11434721		2	269.137	1245.95	335332	15046142
3	153.267	13737.5	2.1055e+06	94472538		3	87.81	3079.21	270387	12132096		3	232.386	1214.76	282294	12666344		3	275.578	1121.06	308938	13861879		3	148.431	1033.61	153419	6883832
4	221.309	23556.9	5.21336e+06	233920306		4	190.241	3270.95	622268	27920785		4	147.316	1340.09	197417	8857978		5	171.141	956.302	163663	7343442		4	257.191	761.955	195968	8792959
5	277.739	18075.3	5.02024e+06	225255004		5	204.037	2041.24	416488	18687551		5	202.098	1437.47	290510	13035027		6	261.113	1370.14	357763	16052604		5	103.434	1128.86	116762	5239033
6	156.878	26802	4.20464e+06	188659596		6	217.855	1796.38	391348	17559567		6	130.468	1178.35	153736	6898056		7	284.47	1384.23	393774	17668378		1	213.954	203.847	43613.9	1956928
7	107.467	34604.8	3.71889e+06	166864264		7	180.457	3330.11	600942	26963899		7	132.563	1765.22	234002	10499539		8	146.96	1322.8	194399	8722555		2	236.13	127.1	30012.1	1346623
1	222.602	23691.1	5.27369e+06	236627035		8	148.81	3330.16	495560	22235472		8	226.524	1392.67	315473	14155083		9	245.089	1772.76	434483	19494993		1	191.199	1010.96	193294	8672986
2	179.632	14792.1	2.65715e+06	119224725		9	157.123	3159.16	496375	22272049		9	300.829	881.166	265080	11893982		10	206.221	851.461	175589	7878571		2	155.585	417.423	64944.7	2914029
3	186.274	17927.7	3.33945e+06	149839296		10	170.918	5559.8	950272	42638135		1	121.553	3045.08	370138	16607843		11	209.274	794.072	166179	7456338		3	254.048	991.685	251936	11304222
4	302.523	25796.9	7.80414e+06	350166835		11	150.704	2051.94	309236	13875248		2	218.189	1424.89	310895	13949684		12	222.446	898.291	199821	8965838		4	206.956	681.515	141044	6328547
5	172.211	12520.4	2.15615e+06	96745191		12	165.124	1877.48	310016	13910229		3	188.235	1959.33	368816	16548526		13	60.598	1152.95	69866.8	3134880		5	262.272	969.283	254216	11406526
6	117.229	16244.6	1.90434e+06	85446412		13	171.988	3172.98	545714	24485860		4	153.178	1054.08	161462	7244702		1	257.904	1024.21	264149	11852207		6	309.431	594.406	183928	8252726
7	136.44	15869.7	2.16527e+06	97154344		1	196.749	2348.12	461991	20729248		5	113.351	1368.31	155100	6959246		2	212.974	1125.64	239731	10756591		7	183.51	566.886	104029	4667737
8	126.188	21381.1	2.69804e+06	121059624		2	149.01	1429.97	213081	9560806		6	169.715	2208.19	374763	16815370		3	291.647	1149.61	335280	15043828		8	85.961	648.816	55772.6	2502484
1	185.984	20109.5	3.74005e+06	167813568		3	183.377	1279.77	234680	10529969		7	135.482	870.241	117902	5290197		4	91.889	723.604	66491.2	2983420		9	233.433	1078.07	251657	11291697
2	231.45	16563	3.83349e+06	172006468		4	219.682	2907.03	638623	28654637		8	227.728	1190.1	271018	12160412		5	195.523	555.865	108684	4876604		10	177.671	1411.15	250721	11249695
3	154.738	35390.8	5.4763e+06	245718021		5	262.25	2566.45	673051	30199374		9	209.809	1305.51	273907	12290037		6	195.3	1057.56	206542	9267407		11	273.304	290.344	79352.2	3560486
4	121.174	33106.7	4.01166e+06	180000887		6	325.656	2393.79	779553	34978064		10	150.191	1344.12	201876	9058041		7	221.51	760.547	168468	7559078		12	278.051	50.502	14042	630057
5	120.327	25579.3	3.07788e+06	138102670		7	160.176	2538.22	406562	18242166		11	169.559	2076.38	352069	15797102		8	180.702	1258.87	227480	10206887		1	181.326	1554.91	281945	12650716
6	171.788	28398.7	4.87854e+06	218897242		1	210.344	2626.05	552373	24784625		12	256.946	1373.34	352873	15833189		9	158.192	1119.46	177091	7945950		2	254.16	1302.35	331004	14851942
7	336.354	11531.1	3.87853e+06	174027243		2	205.686	3203.78	658972	29567655		13	209.764	1867.7	391777	17578798		1	174.462	936.55	163392	7331312		3	166.127	645.816	107287	4813914
8	245.735	15017.8	3.69041e+06	165586438		3	223.003	1948.33	434483	19495006		1	134.747	1789.76	241164	10820879		2	156.164	908.442	141866	6365450		4	203.881	424.564	86560.4	3883913
9	200.003	20582.7	4.11659e+06	184708954		4	218.077	1960.09	427452	19179494		2	181.282	1941.75	352004	15794193		3	245.513	1135.68	278823	12510626		5	198.955	637.499	126834	5690952
1	263.944	14623.4	3.85975e+06	173184589		5	192.559	1878.4	361703	16229370		3	191.578	1334.63	255686	11472463		4	285.428	1282.2	365976	16421099		6	140.697	4239.94	596548	26766764
2	145.355	21398.9	3.11044e+06	139563686		6	184.157	1742.18	320834	14395634		4	277.294	1262.64	350122	15709762		6	219.236	1402.3	307436	13794465		7	232.029	250.158	58043.9	2604396
3	225.967	17302.5	3.90979e+06	175429747		1	198.576	1138.3	226040	10142270		5	219.905	1295.56	284901	12783321		7	199.847	920.579	183975	8254835		1	211.525	5229.93	1.10626e+06	49637258
4	158.861	23963.8	3.80692e+06	170814111		2	174.328	3039.39	529851	23774090		6	154.337	615.458	94987.9	4262048		8	126.768	1152.85	146144	6557386		2	161.224	2068.52	333495	14963703
1	266.262	20455.3	5.44647e+06	244379593		3	128.974	4027.11	519394	23304881		7	175.108	2991.64	523860	23505282		9	131.961	1520.26	200615	9001452		3	384.917	1254.06	482710	21658922
2	187.678	13218.8	2.48087e+06	111315315		4	147.004	3902.3	573655	25739566		8	210.478	1931.82	406606	18244143		10	123.982	1367.5	169546	7607413		4	168.511	725.342	122228	5484313
3	130.2	34807.3	4.53191e+06	203344101		5	214.913	3281.64	705266	31644868		9	144.352	1703.14	245853	11031265		11	168.868	926.026	156376	7016500		5	134.412	1284.11	172600	7744454
4	159.129	6334.89	1.00806e+06	45231097		6	161.201	2997.82	483253	21683266		10	210.255	1583.38	332914	14937638		12	264.679	691.529	183034	8212603		1	152.264	1055.78	160758	7213116
5	244.866	18727.9	4.58582e+06	205762910		7	224.563	5040.96	1.13201e+06	50792676		11	191.511	911.39	174542	7831578		13	194.074	959.142	186145	8352205		2	231.338	933.793	216022	9692767
1	179.231	27714.1	4.96724e+06	222877161		8	182.374	4128.35	752902	33782256		1	157.502	1226.62	193195	8668553		14	273.126	731.396	199763	8963255		3	246.315	1272.88	313529	14067849
2	137.488	26443.9	3.63572e+06	163132509		1	195.634	2951.43	577401	25907625		2	165.28	1255.24	207466	9308887		1	181.594	2048.5	371994	16691162		4	296.238	1043.02	308982	13863846
3	185.494	36264.8	6.72691e+06	301832166		2	194.453	2772.8	539180	24192676		3	143.528	2108.47	302624	13578552		2	184.335	865.868	159610	7161596		5	233.277	647.072	150947	6772903
4	181.259	21886.3	3.96711e+06	178001642		3	175.71	2395.62	420935	18887099		4	199.646	1845.82	368510	16534818		3	233.188	1143.46	266641	11964023		1	175.977	4510.19	793691	35612436
5	119.436	43430.1	5.1871e+06	232741913		4	166.639	3125.52	520834	23369495		5	198.354	1723.68	341899	15340788		4	116.137	1818	211137	9473609		3	161.29	2476.7	399467	17923861
6	219.08	19188.7	4.20387e+06	188624999		5	133.833	4416.85	591120	26523176		6	258.952	2539.06	657494	29501343		5	217.743	2319.95	505152	22665863		4	340.566	621.492	211659	9497012
1	162.427	31525.6	5.1206e+06	229758268		6	209.252	2293.19	479854	21530742		7	233.099	1279.2	298181	13379190		6	153.022	1845.9	282463	12673931		5	282.464	989.586	279523	12542015
2	263.81	10370.3	2.7358e+06	122753748		7	167.709	5410.31	907357	40712570		8	319.683	1115.81	356707	16005203		7	94.653	1737.7	164478	7380006		7	158.103	752.415	118959	5337633
3	187.388	11903.4	2.23056e+06	100083879		8	189.171	2112.59	399641	17931628		9	178.05	2287.29	407252	18273136		8	279.144	742.31	207211	9297436		1	299.179	1008.12	301610	13533075
4	210.01	10107.2	2.12262e+06	95240457		9	236.62	2766.86	654694	29375717		10	181.304	1361.2	246791	11073377		9	170.361	1637.34	278938	12515798		2	209.943	165.059	34653	1554860
5	212.015	9637.37	2.04327e+06	91680306		10	278.653	2103.46	586135	26299512		11	151.15	2611.24	394689	17709448		10	217.632	838.365	182455	8186633		3	182.552	438.513	80051.4	3591856
1	191.266	21125.8	4.04065e+06	181301583		11	240.052	2091	501950	22522174		12	183.154	1187.92	217571	9762291		11	189.884	2173.91	412793	18521753		4	185.561	1150.97	213576	9583019
2	209.23	19080.6	3.99222e+06	179128358		12	243.395	1320.46	321394	14420758		13	175.844	1797.39	316061	14181441		12	289.284	671.417	194230	8714997		5	190.397	796.448	151641	6804057
3	245.691	28174.6	6.92225e+06	310597250		1	171.319	2080.13	356366	15989925		1	156.387	1509.04	235994	10588908		13	306.155	1198.71	366991	16466645		6	266.395	1769.73	471448	21153585
4	224.607	31168.5	7.00068e+06	314116157		2	282.843	1916.28	542006	24319479		2	215.091	2293.43	493296	22133875		1	227.683	1172.78	267021	11981081		7	235.439	622.721	146613	6578422
5	212.194	24610.3	5.22214e+06	234314390		3	146.603	3480.34	510230	22893688		3	236.509	1136.84	268872	12064117		2	160.867	1198.28	192764	8649210		1	325.745	623.141	202985	9107831
6	193.406	22267.8	4.30672e+06	193239841		4	186.987	2379.94	445018	19967684		4	139.627	2133.42	297884	13365851		3	167.91	1204.52	202250	9074830		2	133.632	884.352	118178	5302574
7	317.343	15374.7	4.87907e+06	218921023		5	157.078	2398.68	376780	16905872		5	168.132	1829.12	307535	13798890		4	83.732	1177.52	98596.3	4423955		3	154.069	565.604	87142.2	3910019
8	164.188	16844.3	2.76563e+06	124092130		6	234.169	2084.22	488059	21898925		6	226.792	1293.6	293378	13163695		5	201.095	959.894	193030	8661127		4	198.51	609.331	120958	5427315
9	169.381	14742.1	2.49703e+06	112040255		7	233.723	2448.7	572318	25679536		7	177.538	1375.51	244205	10957347		6	256.478	2242.84	575240	25810661		5	294.789	863.719	254615	11424405
10	208.539	26711	5.57027e+06	249934588		8	170.161	2447.11	416402	18683691		8	180.658	1043.05	188435	8454963		7	175.242	1524.74	267198	11989010		6	196.816	244.038	48030.5	2155100
11	169.693	19858.1	3.36977e+06	151199321		9	184.669	3090.49	570719	25607790		9	204.014	2258.12	460689	20670824		8	193.852	8263.04	1.6018e+06	71871931		7	211.057	250.218	52810.2	2369561
12	228.307	9965.61	2.27522e+06	102087721								10	179.766	1913.61	344003	15435199		9	174.35	750.164	130791	5868530		8	224.808	506.785	113929	5111945
												11	206.265	1335.05	275375	12355901		10	228.017	957.232	218266	9793440
																		11	226.858	428.111	97120.7	4357745
		No UV	0h UV	3h UV	16h UV	24h UV
	Average	1.76565e+08	2.28871e+07	1.34289e+07	1.16413e+07	9.69441e+06
	SD	6.45793e+07	7.94124e+06	4.49107e+06	9.31276e+06	8.51126e+06
	SEM	8.62978e+06	1.0708e+06	594856	1.22283e+06	1.13736e+06
	Percentage	100	12.9624	7.60566	6.59325	5.49057
	SD	36.5755	4.49764	2.54358	5.27442	4.82048
	SEM	4.88761	0.606462	0.336906	0.692566	0.644164

## Sheet: siXPF
No UV						UV						3h post UV						16h post UV						24h post UV
	Area	Mean	IntDen	RawIntDen			Area	Mean	IntDen	RawIntDen			Area	Mean	IntDen	RawIntDen			Area	Mean	IntDen	RawIntDen			Area	Mean	IntDen	RawIntDen
1	231.873	6463.7	1.49876e+06	67248388		1	186.163	1526.21	284123	12748429		1	149.322	563.689	84171.4	3776717		1	113.485	757.355	85948.4	3856451		1	190.776	973.624	185744	8334222
2	153.044	6001.76	918535	41214104		2	126.991	1418.26	180106	8081257		2	145.177	649.31	94264.8	4229606		2	127.481	931.118	118700	5325997		2	117.519	1381.37	162337	7283962
3	215.448	6673.27	1.43774e+06	64510488		3	124.116	1126.54	139821	6273686		3	161.134	797.347	128480	5764820		3	147.651	1655.43	244425	10967216		3	113.307	1280.68	145110	6511004
4	161.38	4798.03	774303	34742520		4	186.274	1221.93	227614	10212911		4	172.857	987.239	170651	7657022		4	132.295	1149.51	152074	6823480		4	122.043	1267.19	154652	6939158
5	221.666	5457.12	1.20966e+06	54276518		5	167.33	1054.42	176436	7916557		5	233.745	1345.87	314591	14115501		5	189.84	1190.34	225974	10139322		5	94.474	1577.96	149076	6688963
6	242.147	6416.07	1.55363e+06	69710560		6	179.432	2254.54	404536	18151277		6	253.848	1137.98	288873	12961544		6	178.897	681.449	121909	5469993		6	116.739	1164.59	135952	6100095
7	236.776	11907	2.8193e+06	126500054		7	185.605	1873.06	347649	15598804		7	220.239	1303.42	287064	12880389		7	195.679	493.418	96551.6	4332211		7	87.342	1433.62	125215	5618340
8	192.024	6240.75	1.19837e+06	53770303		8	192.849	1485.04	286388	12850056		8	160.332	973.886	156145	7006135		1	75.085	2132.86	160145	7185596		1	123.893	709.305	87877.9	3943028
9	184.045	8508.63	1.56597e+06	70264264		9	144.129	1664.39	239888	10763640		9	172.902	835.756	144504	6483796		2	261.292	677.976	177150	7948594		2	144.063	659.111	94953.3	4260496
10	226.257	10626	2.40419e+06	107874661		10	134.68	1799.31	242330	10873202		10	198.71	902.19	179274	8043926		3	145.444	1364.46	198453	8904450		3	116.026	714.167	82861.7	3717952
11	122.578	1891.42	231846	10402796		11	171.119	3056.99	523109	23471567		11	140.541	789.875	111010	4980949		4	235.573	1065.26	250946	11259788		4	132.095	728.709	96258.5	4319058
12	87.677	2486.59	218016	9782236		12	141.544	2082.76	294803	13227641		12	206.332	953.768	196793	8829982		5	238.47	989.512	235969	10587781		1	97.617	1293.69	126286	5666354
13	169.135	1503.78	254342	11412183		13	171.966	1120.52	192691	8645917		13	195.523	746.563	145970	6549593		6	145.935	1142.77	166770	7482879		2	111.613	1700.23	189768	8514763
14	115.491	3009.4	347558	15594698		14	236.999	1908.43	452297	20294268		14	175.398	1149.03	201537	9042836		7	171.074	743.033	127114	5703524		3	124.116	792.861	98406.6	4415445
1	192.782	8774.97	1.69165e+06	75903458		1	157.502	924.628	145630	6534348		1	151.328	454.965	68849	3089211		1	69.936	1142.05	79870.5	3583741		4	176.401	742.557	130988	5877340
2	136.106	4448.8	605509	27168805		2	164.656	1116.43	183827	8248205		2	151.64	603.443	91506.2	4105829		2	171.052	539.106	92215.1	4137636		5	176.579	266.608	47077.4	2112332
3	171.988	3509.34	603564	27081549		3	142.146	1861.61	264620	11873316		3	160.31	1127.52	180752	8110253		3	143.327	1087.64	155889	6994643		1	155.206	739.922	114840	5152815
4	181.17	3687.17	668006	29973034		4	208.583	1251.86	261116	11716137		4	194.721	579.979	112934	5067275		4	84.423	1426.12	120397	5402158		1	98.798	1168.41	115436	5179560
5	136.195	3241.89	441530	19811193		5	130.089	1039.6	135240	6068134		5	166.728	726.14	121068	5432253		5	152.554	769.442	117381	5266831		2	89.928	1362.33	122511	5497011
6	187.99	2516.73	473120	21228587		6	143.951	1093.41	157398	7062332		6	159.173	809.544	128858	5781765		6	148.119	1156.17	171251	7683909		3	154.337	862.673	133142	5974011
7	163.987	3736.68	612768	27494523		7	140.408	1283.71	180243	8087401		7	189.283	1073.16	203131	9114374		7	156.142	758.712	118467	5315538		4	240.609	941.08	226433	10159901
8	232.163	4472.03	1.03824e+06	46585180		8	139.226	2221.48	309288	13877582		8	199.379	1211.05	241457	10834036		8	108.626	1436.74	156068	7002666		1	80.099	1061.29	85008.5	3814281
9	114.778	3172.92	364181	16340557		9	88.925	1362.39	121150	5435934		9	198.755	1402.3	278713	12505673		9	130.936	1033.84	135366	6073809		2	88.836	934.431	83010.7	3724640
10	196.749	6186.87	1.21726e+06	54617722		10	172.478	1109.56	191375	8586865		10	160.733	728.567	117105	5254427		10	92.112	1281.96	118084	5298340		3	197.707	1042.22	206055	9245580
11	211.146	7132.54	1.50601e+06	67573653		11	167.664	1157.06	193997	8704540		11	122.533	967.032	118494	5316741		11	117.563	1040.27	122298	5487447		4	112.371	808.783	90883.5	4077885
12	128.707	5262.85	677366	30392988		12	163.14	1133.87	184979	8299914		12	151.729	931.357	141314	6340676		12	138.513	1121.57	155352	6970550		1	113.307	1526.12	172920	7758810
13	150.414	2038.33	306594	13756687		13	174.395	1581.82	275861	12377705		13	130.044	1119.06	145527	6529686		1	149.122	1368.67	204099	9157789		2	98.419	1271.94	125183	5616895
1	168.222	4038.57	679374	30483104		14	163.787	1177.11	192795	8650587		14	149.79	697.021	104407	4684679		2	117.719	1441.16	169653	7612221		3	148.364	1098.81	163024	7314804
2	172.389	2706.71	466608	20936409		15	233.767	1630.44	381145	17101725		1	213.887	748.839	160167	7186606		3	150.86	1468.14	221484	9937870		4	82.751	1643.24	135980	6101339
3	202.165	3579.35	723618	32468299		16	163.92	1232.94	202104	9068281		2	146.113	503.377	73550	3300142		4	136.218	814.517	110952	4978330		5	160.622	1385.67	222570	9986558
4	240.208	5565.35	1.33684e+06	59983354		1	172.746	1162.01	200732	9006702		3	208.65	913.025	190503	8547742		5	138.045	1673.74	231051	10367119		6	202.387	829.3	167840	7530869
5	180.19	2489.15	448520	20124811		2	156.142	1093.87	170800	7663674		4	343.374	1056.43	362752	16276452		6	70.895	1420.26	100689	4517837		7	150.749	1043.97	157377	7061412
6	214.556	5986.14	1.28436e+06	57628589		3	155.875	769.056	119876	5378776		5	144.709	343.406	49693.9	2229737		7	92.335	1540.82	142271	6383618		8	109.629	1120.48	122838	5511650
7	157.1	2291.71	360029	16154270		4	163.876	853.609	139886	6276587		6	106.175	418.258	44408.5	1992582		8	104.949	1833.16	192389	8632358		1	106.063	889.276	94319.7	4232066
8	164.299	1790.49	294176	13199480		5	220.618	1899.28	419015	18800932		7	122.266	589.399	72063.5	3233444		1	123.202	1160.79	143011	6416824		2	194.342	1002.63	194852	8742898
9	196.415	5874.36	1.15381e+06	51770772		6	76.355	1492.5	113960	5113300		8	174.395	623.5	108735	4878885		2	107.757	1027.75	110748	4969175		3	107.802	1983.09	213780	9592193
10	152.197	2677.6	407524	18285351		7	230.179	1759.48	404995	18171884		9	205.307	450.694	92530.7	4151795		3	119.792	1580.43	189323	8494788		4	204.282	1425.51	291205	13066189
11	213.419	5024.83	1.0724e+06	48117797		8	108.314	1548.49	167723	7525645		10	177.627	1036.21	184059	8258628		4	76.021	5520.38	419663	18830012		5	139.405	2495.42	347873	15608845
12	135.17	3168.07	428229	19214377		9	133.699	3562.17	476259	21369444		11	165.748	785.267	130156	5840034		2	121.62	5916.79	719598	32287918		1	125.631	605.293	76043.8	3412039
13	280.748	5226.21	1.46725e+06	65834563		10	102.141	1847.93	188750	8469078		1	178.206	283.265	50479.5	2264984		3	121.62	5974.01	726557	32600168		2	143.617	906.6	130203	5842133
14	130.668	3887.16	507928	22790418		11	113.218	1623.25	183780	8246112		2	156.031	333.658	52060.9	2335942		4	140.274	1406.93	197356	8855226		3	128.061	1743.54	223279	10018384
15	139.984	3441.84	481803	21618185		12	116.672	1697.03	197996	8883965		3	165.101	499.154	82411	3697731		1	149.902	1167.63	175030	7853469		4	118.388	1034.78	122505	5496744
16	140.809	3447.1	485382	21778787		13	155.563	1818.68	282918	12694360		4	254.182	504.719	128291	5756318		2	107.467	726.053	78027.1	3501028		5	190.887	1095.53	209124	9383251
1	118.678	3650.55	433240	19439202		14	129.777	2034.52	264033	11846992		1	81.147	784.364	63648.5	2855869		3	111.524	1396.71	155767	6989155		6	136.686	2101.08	287187	12885904
2	133.721	3026.69	404733	18160130		15	162.628	3018.35	490868	22024932		2	177.27	380.114	67382.8	3023427		4	164.143	812.581	133380	5984660
3	172.322	3156.28	543897	24404315		16	131.092	5427.81	711541	31926392		3	112.014	551.797	61809	2773330		5	184.736	803.342	148406	6658899
4	168.935	3773.43	637463	28602589		17	155.763	1906.53	296968	13324761		4	85.136	1206.86	102747	4610191		6	308.785	1408.38	434886	19513060
5	169.247	2845.26	481551	21606906		1	95.343	1595.66	152136	6826246		5	114.889	650.883	74779.3	3355302		7	187.611	2190.56	410974	18440140
6	153.78	14413.1	2.21644e+06	99450525		2	109.741	1194.62	131099	5882323		6	134.256	427.841	57440.3	2577312		1	153.936	893.733	137577	6173014
7	245.267	5595.18	1.37232e+06	61574989		3	219.259	1482.03	324947	14580189		7	175.554	1276.44	224085	10054559		2	161.981	912.515	147810	6632161
8	163.63	5675.16	928629	41667009		4	164.076	797.969	130928	5874646		8	148.475	821.79	122016	5474763		3	173.593	979.441	170024	7628865
9	110.855	11618.8	1.288e+06	57791680		5	94.809	1532.39	145284	6518799		9	195.144	396.525	77379.6	3471973		1	125.631	878.642	110385	4952903
10	166.929	7450.39	1.24369e+06	55803437		6	135.081	1281.41	173094	7766625		10	138.669	208.895	28967.3	1299744		2	141.321	839.64	118659	5324160
						7	143.015	987.173	141181	6334692		11	135.75	222.618	30220.3	1355966		3	187.277	774.633	145071	6509245
						8	200.047	2840.18	568170	25493429		1	166.349	584.472	97226.7	4362501		4	143.862	1206.32	173544	7786804
						9	142.569	1018.2	145164	6513409		2	134.546	740.8	99671.7	4472209		5	177.582	964.995	171366	7689077
						10	156.744	1719.12	269461	12090562		3	164.054	627.298	102911	4617541		6	158.571	1180.14	187137	8396727
						11	131.359	1340.69	176112	7902042		4	154.493	762.025	117727	5282360		7	372.258	749.942	279172	12526277
						12	198.621	2558.54	508180	22801731		5	98.53	808.859	79697.2	3575964
						13	125.03	1379.8	172516	7740676		6	165.748	2927.24	485184	21769919
						14	109.629	1239.11	135842	6095165
		No UV	0h UV	3h UV	16h UV	24h UV
	Average	4.04551e+07	1.13106e+07	6.15623e+06	8.4794e+06	6.77934e+06
	SD	2.61889e+07	5.805e+06	3.84274e+06	5.65054e+06	2.7996e+06
	SEM	3.59732e+06	743255	496096	741952	422055
	Percentage	100	27.9584	15.2174	20.96	16.7577
	SD	64.7356	14.3492	9.49878	13.9674	6.92026
	SEM	8.89213	1.83723	1.22629	1.83401	1.04327
