# Supplementary material for: XAB2 dynamics during DNA damage-dependent transcription inhibition
Source: eLife. 2022 Jul 26;11:e77094. doi: 10.7554/eLife.77094 (PMC9436415; doi:10.7554/eLife.77094)
Supplement: Figure 1—source data 3. [file elife-77094-fig1-data3.xlsx]

## Sheet: Feuil1
	siMock						siXAB2						siXPF
Paste	Area	Mean	IntDen	RawIntDen		Paste	Area	Mean	IntDen	RawIntDen		Paste	Area	Mean	IntDen	RawIntDen
1	3.183	128.615	409.435	85529		1	3.375	37.848	127.722	27099		1	3.375	62.408	210.603	44684
1	3.356	182.055	611.038	147829		1	3.375	32.743	110.495	23444		1	3.375	23.778	80.242	17025
1	3.356	95.081	319.124	77206		2	3.375	29.059	98.062	20806		1	3.375	26.23	88.518	18781
2	3.356	118.993	399.378	96622		1	3.375	27.073	91.36	19384		2	3.375	21.962	74.114	15725
1	3.356	105.639	354.56	85779		2	3.375	15.739	53.113	11269		1	3.375	49.865	168.274	35703
1	3.356	153.01	513.551	124244		3	3.375	17.838	60.197	12772		1	3.375	66.77	225.322	47807
1	3.356	98.679	331.198	80127		1	3.375	17.916	60.46	12828		1	3.375	46.827	158.023	33528
2	3.356	124.951	419.376	101460		1	3.375	23.444	79.115	16786		1	3.375	67.813	228.843	48554
1	3.827	100.516	384.684	81619		1	3.375	31.774	107.224	22750		1	3.375	36.682	123.786	26264
1	3.827	67.431	258.064	54754		1	3.375	18.975	64.033	13586		1	3.375	69.06	233.052	49447
2	3.827	75.615	289.383	61399		1	3.375	26.844	90.587	19220		1	3.375	52.105	175.834	37307
1	3.827	127.479	487.874	103513		1	3.375	25.249	85.205	18078		1	3.375	35.471	119.7	25397
1	3.827	133.341	510.308	108273		1	3.375	57.528	194.135	41190		1	3.375	67.278	227.038	48171
3	3.183	40.078	127.586	26652		1	3.375	23.366	78.851	16730		1	3.375	135.45	457.092	96982
4	3.183	58.361	185.787	38810		2	3.375	20.497	69.17	14676		1	3.375	23.222	78.366	16627
9	3.183	174.377	555.116	115961		1	3.375	31.024	104.693	22213		1	3.375	55.297	186.608	39593
11	3.183	161.164	513.052	107174		2	3.375	26.197	88.405	18757		2	3.375	33.168	111.928	23748
16	3.183	150.147	477.982	99848		1	3.375	30.453	102.766	21804		1	3.375	36.52	123.24	26148
24	3.183	188.173	599.033	125135		2	3.375	26.372	88.994	18882		1	3.375	7.911	26.695	5664
						1	3.375	18.268	61.648	13080		1	3.375	36.307	122.523	25996
						2	3.375	56.513	190.709	40463
						1	3.375	43.789	147.772	31353
						1	3.375	79.082	266.873	56623
						1	3.375	16.218	54.729	11612
						2	3.375	17.45	58.886	12494
						1	3.375	16.891	57.001	12094
	mean	120.195	100				mean	29.5442	24.5802				mean	47.7062	39.6907
	sd	42.2052	35.1139				sd	15.0343	12.5082				sd	27.3588	22.762
	sem	9.68253	8.05569				sem	2.94846	2.45307				sem	6.11762	5.08975
