# Supplementary material for: XAB2 dynamics during DNA damage-dependent transcription inhibition
Source: eLife. 2022 Jul 26;11:e77094. doi: 10.7554/eLife.77094 (PMC9436415; doi:10.7554/eLife.77094)
Supplement: Figure 2—figure supplement 1—source data 1. [file elife-77094-fig2-figsupp1-data1.xlsx]

## Sheet: PLA XAB2-CPD
NoVU		area	mean	intden	rawintden		1h		area	mean	intden	rawintden		2h		area	mean	intden	rawintden		4h		area	mean	intden	rawintden		16h		area	mean	intden	rawintden
	1	17812	165.933	2955592	2955592			1	17053	480.752	8198265	8198265			1	8915	539.653	4811009	4811009			1	12302	1011.35	12441590	12441590			1	20086	444.043	8919050		8919050
	2	18858	159.071	2999755	2999755			2	14424	643.673	9284333		9284333		2	9353	636.709	5955142	5955142			2	13296	829.471	11028652	11028652			2	9885	418.778	4139624	4139624
	3	16868	181.374	3059418	3059418			3	16109	498.963	8037799	8037799			3	12510	415.698	5200388	5200388			3	11416	786.732	8981332	8981332			3	11981	390.309	4676291	4676291
	4	17375	166.644	2895445	2895445			4	12855	535.472	6883491	6883491			4	9916	486.901	4828110	4828110			4	15161	794.846	12050667	12050667			4	8050	498.785	4015223	4015223
	5	15437	133.589	2062216	2062216			5	14772	504.492	7452360	7452360			5	17262	599.648	10351130		10351130		5	22231	436.895	9712604	9712604			5	16374	356.847	5843018	5843018
	6	14720	107.369	1580476	1580476			6	16012	437.794	7009952	7009952			6	9588	520.874	4994144	4994144			6	12904	798.107	10298772	10298772			6	12545	480.778	6031366	6031366
	7	12195	165.708	2020813	2020813			7	13824	430.922	5957068	5957068			7	9559	502.055	4799146	4799146			7	11484	782.283	8983740	8983740			7	13988	479.309	6704573	6704573
	8	15829	97.94	1550295	1550295			8	18414	326.994	6021263	6021263			8	10159	487.422	4951721	4951721			8	13020	790.617	10293830	10293830			8	20091	390.52	7845938	7845938
	9	19219	149.431	2871919	2871919			9	14065	414.186	5825526	5825526			9	9548	668.021	6378261	6378261			9	13367	452.95	6054588	6054588			9	14938	313.45	4682323	4682323
	10	11111	92.702	1030010	1030010			10	13890	388.577	5397330	5397330			10	8896	511.737	4552416	4552416			10	15291	584.383	8935808	8935808			1	14438	356.213	5143002	5143002
	11	10113	109.403	1106396	1106396			11	13167	452.688	5960537	5960537			11	10925	403.806	4411580	4411580			11	12453	363.168	4522527	4522527			2	15027	215.856	3243674	3243674
	12	12982	115.547	1500031	1500031			12	12870	492.24	6335129	6335129			12	11866	256.591	3044712	3044712			12	10601	469.91	4981517	4981517			3	15339	507.652	7786868	7786868
	13	22752	151.229	3440773	3440773			13	16046	560.163	8988379		8988379		13	9244	429.141	3966975	3966975			13	13738	548.065	7529321	7529321			4	14353	234.201	3361484	3361484
	14	10988	160.347	1761895	1761895			14	15247	631.752	9632327		9632327		14	11110	529.683	5884773	5884773			14	10001	334.289	3343227	3343227			5	16135	389.706	6287904	6287904
	15	13640	185.6	2531587	2531587			15	12389	897.797	11122810		11122810		15	6618	721.29	4773495	4773495			15	11087	557.744	6183713	6183713			6	14749	348.081	5133850	5133850
	16	13304	117.315	1560758	1560758			16	16140	327.746	5289822	5289822			16	13258	396.885	5261905	5261905			16	10538	741.502	7813953	7813953			7	16054	325.181	5220452	5220452
	17	11431	172.59	1972875	1972875			17	7289	282.032	2055732	2055732			17	9529	445.859	4248592	4248592			17	9707	595.184	5777452	5777452			8	12467	167.853	2092624	2092624
	18	17115	101.349	1734593	1734593			18	6278	536.244	3366538	3366538			18	12294	604.806	7435488	7435488			18	11938	462.487	5521175	5521175			9	13362	323.315	4320137	4320137
	19	18306	111.595	2042858	2042858			19	16232	323.337	5248413	5248413			19	12404	547.394	6789879	6789879			19	12036	443.623	5339442	5339442			10	10237	253.25	2592522	2592522
	20	10495	178.473	1873069	1873069			20	11461	430.988	4939549	4939549			20	12960	674.274	8738594	8738594			20	7048	581.608	4099170	4099170			11	9846	259.575	2555773	2555773
	21	18156	124.068	2252575	2252575			21	10438	453.416	4732752	4732752			21	10668	451.521	4816830	4816830			21	11974	560.053	6706070	6706070			12	14369	231.748	3329983	3329983
	22	9929	138.13	1371495	1371495			22	8266	586.864	4851021	4851021			22	16288	453.41	7385136	7385136			22	11433	334.91	3829023	3829023			13	15305	286.11	4378915	4378915
	23	12496	52.931	661424	661424			23	12185	432.048	5264500	5264500			23	11275	541.947	6110457	6110457			1	12133	447.863	5433920	5433920			1	11483	187.985	2158633	2158633
	24	19010	131.418	2498252	2498252			24	11654	265.058	3088988	3088988			24	8071	656.726	5300435	5300435			2	14715	447.088	6578897	6578897			2	12125	190.425	2308901	2308901
	25	10228	127.95	1308675	1308675			25	11505	336.152	3867427	3867427			25	13321	573.598	7640905	7640905			3	11263	400.07	4505983	4505983			3	12263	189.372	2322263	2322263
	26	6620	241.179	1596602	1596602			1	14677	500.049	7339223	7339223			26	17681	330.496	5843492	5843492			4	11005	321.015	3532771	3532771			4	11440	148.596	1699943	1699943
	27	13164	70	921477	921477			2	15939	344.244	5486911	5486911			27	13423	408.267	5480162	5480162			5	13182	666.716	8788655	8788655			5	13103	134.6	1763669	1763669
	28	13267	112.463	1492049	1492049			3	8898	314.846	2801500	2801500			28	13811	447.294	6177576	6177576			6	17249	350.809	6051097	6051097			6	12073	192.084	2319031	2319031
	29	10698	87.557	936683	936683			4	12999	335.315	4358755	4358755			29	18437	661.395	12194144		12194144		7	9495	473.976	4500398	4500398			7	12380	160.633	1988637	1988637
	30	8579	121.609	1043283	1043283			5	15751	504.719	7949826	7949826			30	15606	421.147	6572423	6572423			8	14205	603.753	8576307	8576307			8	11515	143.885	1656834	1656834
	31	9653	88.496	854250	854250			6	14386	448.549	6452830	6452830			31	12895	445.615	5746205	5746205			9	11748	378.698	4448947	4448947			9	12243	193.584	2370045	2370045
	32	11248	87.399	983069	983069			7	12542	548.524	6879583	6879583			32	11516	511.761	5893441	5893441			10	11435	559.145	6393824	6393824			10	14724	191.494	2819554	2819554
	1	10016	142.608	1428364	1428364			8	18941	376.215	7125893	7125893			33	11551	757.591	8750930	8750930			11	11464	414.566	4752586	4752586			11	12298	147.946	1819439	1819439
	2	10920	208.036	2271755	2271755			9	17139	479.272	8214249	8214249			34	6953	477.37	3319157	3319157			12	16081	710.303	11422375	11422375			12	12285	241.718	2969500	2969500
	3	7288	155.281	1131687	1131687			10	13404	377.05	5053975	5053975			35	9702	339.122	3290164	3290164			13	8671	555.266	4814713	4814713			13	15116	162.943	2463041	2463041
	4	16355	150.025	2453651	2453651			11	10662	491.073	5235816	5235816			36	14651	209.197	3064945	3064945			14	11729	461.749	5415854	5415854			14	9030	190.53	1720489	1720489
	5	8720	153.169	1335631	1335631			12	17533	426.686	7481081	7481081			37	13766	574.64	7910500	7910500			15	15613	623.784	9739132	9739132			15	9879	196.911	1945284	1945284
	6	16391	118.179	1937070	1937070			13	15069	455.063	6857338	6857338			38	9957	395.894	3941919	3941919			16	11136	547.401	6095855	6095855			16	10382	192.522	1998763	1998763
	7	13501	148.845	2009557	2009557			14	20857	401.311	8370148	8370148			39	11059	427.152	4723877	4723877			17	17035	470.213	8010082	8010082			17	10161	195.261	1984049	1984049
	8	10188	91.769	934942	934942			15	12556	484.071	6077992	6077992			40	10621	332.38	3530206	3530206			18	12729	650.493	8280120	8280120			18	14160	156.156	2211173	2211173
	9	13670	104.23	1424827	1424827			16	7395	332.425	2458284	2458284			41	8177	760.039	6214841	6214841			19	15070	734.692	11071805	11071805			19	11714	144.971	1698190	1698190
	10	11443	133.433	1526872	1526872			17	15385	417.128	6417517	6417517			42	9936	233.941	2324442	2324442			20	15250	759.441	11581482	11581482			20	10198	166.773	1700754	1700754
	11	16493	150.593	2483732	2483732			18	15924	222.185	3538071	3538071			43	8781	359.351	3155460	3155460			21	18225	589.878	10750531	10750531			21	11229	190.354	2137480	2137480
	12	9997	128.259	1282205	1282205			19	12246	314.357	3849621	3849621			44	7792	555.944	4331912	4331912			22	16591	632.105	10487252	10487252			22	12338	113.07	1395057	1395057
	13	9902	133.31	1320040	1320040			20	10286	549.137	5648422	5648422			45	10763	223.574	2406323	2406323			23	12850	389.384	5003578	5003578			23	13254	99.477	1318468	1318468
	14	9926	79.77	791800	791800			21	11202	310.679	3480229	3480229			46	12721	250.371	3184964	3184964			24	14749	509.122	7509039	7509039			24	9639	86.449	833279	833279
	15	10630	139.93	1487459	1487459			22	11597	217.549	2522921	2522921			1	8791	528.547	4646458	4646458			25	10753	398.058	4280318	4280318			25	15209	133.708	2033562	2033562
	16	15873	95.724	1519425	1519425			23	7653	98.708	755410		755410		2	9845	733.681	7223087	7223087			26	15641	212.281	3320281	3320281			26	17103	126.515	2163789	2163789
	17	15318	105.824	1621014	1621014			24	14718	313.53	4614537	4614537			3	8378	228.106	1911075		1911075		27	13938	289.518	4035301	4035301			27	14248	88.243	1257288	1257288
	18	11956	154.402	1846027	1846027			25	12322	260.617	3211319	3211319			4	11784	570.242	6719732	6719732			28	9931	448.316	4452228	4452228			28	13853	94.599	1310480	1310480
	19	17510	130.5	2285057	2285057			26	8566	294.362	2521506	2521506			5	11895	565.981	6732344	6732344			1	21996	379.13	8339348	8339348			29	14830	114.249	1694308	1694308
	20	15194	131.479	1997694	1997694			27	13513	142.378	1923958	1923958			6	16099	472.778	7611247	7611247			2	13794	561.899	7750837	7750837			30	13547	102.11	1383279	1383279
	21	12581	97.222	1223147	1223147			1	17672	379.316	6703271	6703271			7	13913	873.74	12156346		12156346		3	15551	506.364	7874472	7874472			1	13598	143.352	1949303	1949303
	22	16288	99.33	1617886	1617886			2	11407	364.905	4162475	4162475			8	9734	323.514	3149082	3149082			4	16705	557.424	9311762	9311762			2	14524	188.228	2733825	2733825
	23	12946	87.52	1133028	1133028			3	10383	309.059	3208963	3208963			9	13445	591.259	7949478	7949478			5	18506	409.037	7569644	7569644			3	13593	174.287	2369081	2369081
	24	11395	112.671	1283881	1283881			4	16508	541.779	8943685		8943685		10	7588	335.322	2544421	2544421			6	20571	501.17	10309578	10309578			4	20604	174.918	3604012	3604012
	25	11335	149.642	1696187	1696187			5	8914	684	6097176	6097176			11	13260	520.663	6903997	6903997			7	15803	414.633	6552447	6552447			5	13057	214.398	2799394	2799394
	26	8655	164.759	1425987	1425987			6	12953	642.691	8324772	8324772			12	9948	380.201	3782235	3782235			8	11673	274.623	3205677	3205677			6	19749	204.443	4037536	4037536
	27	13359	80.146	1070669	1070669			7	13957	551.886	7702669	7702669			13	13103	355.128	4653240	4653240			9	14118	438.4	6189332	6189332			7	13797	175.615	2422964	2422964
	28	13050	94.236	1229780	1229780			8	14504	332.176	4817883	4817883			14	11908	455.822	5427923	5427923			10	18214	304.075	5538423	5538423			8	11751	162.957	1914910	1914910
	29	13606	89.805	1221882	1221882			9	11915	661.896	7886496	7886496			15	10447	312.774	3267545	3267545			11	15950	520.118	8295875	8295875			9	7753	110.7	858256	858256
	30	17377	86.936	1510695	1510695			10	11199	422.004	4726023	4726023			16	11070	534.262	5914278	5914278			12	17463	640.362	11182634	11182634			10	13955	200.328	2795583	2795583
	31	13335	81.263	1083646	1083646			11	13236	444.659	5885502	5885502			17	10260	398.277	4086325	4086325			13	14439	130.508	1884407	1884407			11	11471	156.904	1799843	1799843
	32	14000	57.21	800945	800945			12	10516	408.054	4291098	4291098			18	8155	533.133	4347702	4347702			14	16063	406.59	6531062	6531062			12	15049	173.725	2614389	2614389
	33	8216	97.668	802439	802439			13	14233	496.182	7062158	7062158			19	7639	350.366	2676446	2676446			15	18512	520.547	9636369	9636369			1	13864	387.595	5373614	5373614
	34	15023	53.555	804563	804563			14	15760	362.103	5706743	5706743			20	9215	666.857	6145090	6145090			16	15806	119.925	1895536	1895536			2	11565	329.586	3811666	3811666
	35	14259	44.464	634007	634007			15	11299	352.082	3978170	3978170			21	10509	552.5	5806220	5806220			17	18456	373.569	6894597	6894597			3	11886	415.004	4932739	4932739
	1	15261	135.337	2065379	2065379			16	15045	493.79	7429069	7429069			22	9556	427.915	4089151	4089151			18	17727	362.106	6419052	6419052			4	12974	436.306	5660640	5660640
	2	16555	142.617	2361025	2361025			17	16977	293.003	4974315	4974315			23	14009	403.966	5659165	5659165			19	18590	469.847	8734461	8734461			5	13148	416.338	5474012	5474012
	3	13939	115.077	1604063	1604063			18	11905	302.088	3596354	3596354			24	14215	520.392	7397371	7397371										6	14671	550.108	8070641	8070641
	4	13655	136.782	1867764	1867764			19	9885	232.251	2295800	2295800			25	15496	349.946	5422759	5422759										7	18052	530.953	9584762		9584762
	5	10227	154.759	1582717	1582717			20	10360	248.719	2576729	2576729			26	16421	473.599	7776973	7776973										8	12778	304.668	3893050	3893050
	6	12100	198.012	2395940	2395940			21	6025	253.435	1526943		1526943		27	13467	301.093	4054823	4054823										9	23439	441.292	10343450		10343450
	7	13156	178.334	2346157	2346157			22	11092	440.896	4890422	4890422			28	8880	338.191	3003134	3003134										10	14528	332.012	4823477	4823477
	8	16514	181.087	2990473	2990473			23	14446	334.615	4833847	4833847			29	10957	386.487	4234742	4234742										11	10945	333.444	3649540	3649540
	9	15753	176.526	2780812	2780812			24	10908	421.924	4602346	4602346			30	6020	405.527	2441270	2441270										12	12620	440.777	5562605	5562605
	10	13761	100.995	1389799	1389799										1	10288	417.849	4298834	4298834										13	12999	451.293	5866360	5866360
	11	17680	117.949	2085345	2085345										2	10497	515.083	5406827	5406827										14	14248	377.516	5378855	5378855
	12	17392	110.78	1926690	1926690										3	10071	388.5	3912587	3912587										15	11417	481.471	5496950	5496950
	13	10518	91.442	961787	961787										4	13135	624.566	8203675	8203675										16	10838	517.661	5610409	5610409
	14	21580	120.523	2600890	2600890										5	7345	717.952	5273355	5273355										17	13211	470.973	6222022	6222022
	15	11669	117.808	1374705	1374705										6	13219	480.475	6351399	6351399										18	13137	343.54	4513089	4513089
	16	16045	167.269	2683827	2683827										7	12551	504.282	6329240	6329240										19	15496	264.392	4097019	4097019
	17	11983	167.89	2011830	2011830										8	8830	706.069	6234593	6234593										20	10562	307.123	3243836	3243836
	18	16866	179.054	3019930	3019930										9	10291	1091.61	11233778		11233778									21	16428	467.174	7674736	7674736
	19	6592	168.231	1108977	1108977										10	11053	608.488	6725621	6725621
	20	10152	118.779	1205840	1205840										11	11272	447.768	5047236	5047236
	21	11701	110.812	1296608	1296608										12	10964	605.182	6635210	6635210
	22	10380	136.424	1416081	1416081										13	11474	466.139	5348484	5348484
	23	11744	73.238	860109	860109										14	10846	405.625	4399412	4399412
	24	8448	101.027	853479	853479										15	10665	280.942	2996245	2996245
	25	14306	93.037	1330994	1330994										16	8193	528.436	4329473	4329473
	26	16271	53.586	871892	871892										17	12420	638.987	7936222	7936222
															18	10243	342.639	3509648	3509648
															19	13892	660.826	9180193	9180193
															20	10801	344.021	3715767	3715767
															21	11636	604.358	7032315	7032315
															22	10577	659.522	6975761	6975761
															23	8968	494.919	4438432	4438432
															24	8435	469.654	3961531	3961531
	No UV	1h	2h	4h	16h	Control									25	11109	391.16	4345391	4345391
Average	1.6784e+06	5.32474e+06	5.27755e+06	7.07793e+06	3.48884e+06	#REF!									26	12278	520.918	6395836	6395836
SD	662024	1.77027e+06	1.64219e+06	2.62758e+06	1.82935e+06	#REF!									27	9782	303.24	2966290	2966290
SEM	68648.7	213116	169379	316323	202018	#REF!									28	10012	193.595	1938278	1938278
Percentage	100	317.251	314.439	421.707	207.867	#REF!
SD	39.4437	105.474	97.8425	156.552	108.994	#REF!
SEM	4.09012	12.6975	10.0917	18.8467	12.0364	#REF!

## Sheet: IF XAB2
NoVU		area	mean	intden	rawintden		1h		area	mean	intden	rawintden		2h		area	mean	intden	rawintden		4h		area	mean	intden	rawintden		16h		area	mean	intden	rawintden
	1	7832	2093.9	16399459	16399459			1	17038	1639.92	27941007	27941007			1	14123	2229.14	31482131	31482131			1	9942	2270.58	22574074	22574074			1	14117	1244.3	17565764	17565764
	2	13550	1715.57	23245923	23245923			2	11001	2176.33	23941800	23941800			2	13202	2140.7	28261528	28261528			2	8630	2454.26	21180261	21180261			2	7528	1768.9	13316278	13316278
	3	10775	1832.83	19748761	19748761			3	15914	1961.49	31215131	31215131			3	16708	2211.44	36948737	36948737			3	10639	1839.04	19565541	19565541			3	7178	1377.37	9886762	9886762
	4	7845	2038.07	15988630	15988630			4	13510	1973.81	26666148	26666148			4	11889	2124.89	25262753	25262753			4	9020	1593.87	14376727	14376727			4	5105	1875.33	9573557	9573557
	5	10019	2172.48	21766069	21766069			5	16075	2250.34	36174215	36174215			5	10168	2213.81	22510012	22510012			5	15275	1584.71	24206380	24206380			5	12086	1172.65	14172682	14172682
	6	9808	1898.08	18616317	18616317			6	17165	1684.12	28907966	28907966			6	12811	1667.32	21360093	21360093			6	15585	928.355	14468411	14468411			6	6812	2245.76	15298100	15298100
	7	10390	1893.54	19673886	19673886			7	10383	2840.66	29494534	29494534			7	6015	2449.59	14734279	14734279			7	11620	2125.87	24702571	24702571			7	12185	2484.74	30276540	30276540
	8	13337	1969.98	26273608	26273608			8	17394	1956.58	34032776	34032776			8	10961	2430.5	26640745	26640745			8	11933	2292.84	27360395	27360395			8	7760	2316.42	17975421	17975421
	9	9164	1572.92	14414208	14414208			9	8762	1973.59	17292556	17292556			9	10422	2204.9	22979502	22979502			9	8356	2540.39	21227525	21227525			9	15066	2944.45	44361067		44361067
	10	11159	1659.94	18523314	18523314			10	17939	1788.01	32075049	32075049			10	8359	1698.71	14199535	14199535			10	12205	2125.59	25942817	25942817			10	10069	2972.03	29925353	29925353
	11	14982	2048.85	30695919	30695919			11	8080	2243.02	18123594	18123594			11	8193	1988.81	16294352	16294352			11	8687	2143.19	18617854	18617854			11	10596	1330	14092667	14092667
	12	14355	1759.3	25254696	25254696			12	10768	1161.21	12503866	12503866			12	9792	2054.28	20115491	20115491			12	14035	1752.74	24599716	24599716			12	8616	1646.53	14186519	14186519
	13	11556	1709.17	19751179	19751179			13	19721	1655.57	32649487	32649487			13	11749	2119.68	24904179	24904179			13	9669	2429.46	23490407	23490407			13	8193	2242.48	18372657	18372657
	14	11721	1504.61	17635529	17635529			14	13028	1594.98	20779419	20779419			14	8890	2112.94	18784062	18784062			14	7673	1964.69	15075086	15075086			14	7049	2467.72	17394984	17394984
	15	15336	1509.11	23143729	23143729			15	11772	1698.05	19989494	19989494			15	10241	2292.81	23480709	23480709			15	11159	1893.26	21126934	21126934			15	6983	2157.36	15064820	15064820
	16	12595	1590.99	20038522	20038522			16	13226	1421.63	18802465	18802465			16	13397	2600.59	34840040	34840040			16	12756	1833.21	23384487	23384487			16	14832	2030.86	30121736	30121736
	17	11674	1798.5	20995655	20995655			17	8996	1634.32	14702372	14702372			17	9236	1846.57	17054899	17054899			17	19592	1747.31	34233256	34233256			17	8217	1210.24	9944529	9944529
	18	8715	2046.05	17831321	17831321			18	9564	1501.17	14357148	14357148			18	8055	1866.62	15035618	15035618			18	10996	1759.33	19345570	19345570			18	14833	2514.68	37300231	37300231
	19	9079	1521.66	13815124	13815124			19	6138	2214.03	13589721	13589721			19	8906	1793.46	15972568	15972568			19	15189	1389.51	21105322	21105322			19	10532	1276.97	13449021	13449021
	20	8362	1745.34	14594542	14594542			20	6585	1239.92	8164881	8164881			20	8858	1986.23	17593996	17593996			20	11641	2639.63	30727884	30727884			20	11799	1636.72	19311724	19311724
	21	11245	1337.67	15042131	15042131			21	8788	1989.09	17480128	17480128			21	7580	1443.11	10938789	10938789			21	5674	2405.91	13651142	13651142			21	12946	2469.87	31974944	31974944
	22	9004	1852.14	16676666	16676666			22	9347	1578.21	14751577	14751577			22	13089	1421.36	18604135	18604135			22	13737	1309.14	17983722	17983722			22	9986	2179.8	21767432	21767432
	23	9003	1581.19	14235475	14235475			23	6012	1846.68	11102243	11102243			23	9355	1745.7	16331057	16331057			23	13121	1469.2	19277376	19277376			23	13569	1366.94	18547971	18547971
	24	10783	1905.27	20544506	20544506			24	12917	1380.63	17833620	17833620			24	13522	1473.53	19925046	19925046			24	6600	1873.11	12362517	12362517			24	11107	1429.96	15882534	15882534
	25	6300	2012.85	12680964	12680964			25	8022	1762.18	14136188	14136188			25	8479	1684.38	14281862	14281862			25	8594	1759.03	15117083	15117083			25	14558	609.337	8870722	8870722
	26	5536	1889.59	10460774	10460774			26	8636	1441.5	12448801	12448801			26	10303	2024.04	20853698	20853698			1	14323	2212.48	31689407	31689407			26	10083	1576.69	15897815	15897815
	27	12180	1714.63	20884175	20884175			27	9704	1503.7	14591865	14591865			1	8679	1968.02	17080407	17080407			2	9782	2401.79	23494268	23494268			1	16221	2531.41	41062050		41062050
	28	9026	1554.71	14032809	14032809			28	12787	1272.46	16270984	16270984			2	7632	2404.58	18351732	18351732			3	9386	4098.19	38465602		38465602		2	15454	2131.19	32935375	32935375
	29	9469	1285.88	12176003	12176003			1	14344	1959.06	28100759	28100759			3	15619	1807.64	28233591	28233591			4	9801	2173.03	21297888	21297888			3	12030	1742.58	20963235	20963235
	1	11290	1850.64	20893781	20893781			2	8358	2072.56	17322466	17322466			4	9191	1755.23	16132312	16132312			5	10020	1636.81	16400816	16400816			4	11508	1619.38	18635852	18635852
	2	11174	1462.38	16340595	16340595			3	8823	2350.75	20740653	20740653			5	9152	2096.47	19186847	19186847			6	10243	3525.22	36108856		36108856		5	11894	2395.68	28494174	28494174
	3	12223	1714.67	20958434	20958434			4	8934	2014.06	17993624	17993624			6	9653	1828.69	17652359	17652359			7	11467	2483.07	28473330	28473330			6	16278	2099.93	34182606	34182606
	4	12738	2088.56	26604040	26604040			5	8229	1872.15	15405957	15405957			7	13228	2233.07	29539091	29539091			8	11061	2452.38	27125754	27125754			7	13879	1160.62	16108289	16108289
	5	9426	1607.26	15150060	15150060			6	8950	2046.47	18315886	18315886			8	9257	2377.47	22008201	22008201			9	11093	2199.43	24398326	24398326			8	6853	2700.91	18509349	18509349
	6	10131	1728.03	17506633	17506633			7	6811	2038.39	13883473	13883473			9	10379	1905.45	19776711	19776711			10	14009	2364.46	33123753	33123753			9	17062	915.167	15614575	15614575
	7	7516	2620.34	19694506	19694506			8	8159	1615.51	13180964	13180964			10	10963	3147.24	34503237	34503237			11	11284	1982.18	22366897	22366897			10	12461	2130.9	26553165	26553165
	8	11355	2271.38	25791508	25791508			9	9250	1665.05	15401698	15401698			11	5493	2641.78	14511291	14511291			12	13351	1872.93	25005494	25005494			11	9444	2050.56	19365457	19365457
	9	9304	1607.72	14958195	14958195			10	9544	2136.82	20393793	20393793			12	8709	2307.71	20097870	20097870			13	16011	1856.03	29716851	29716851			12	6981	2180.01	15218625	15218625
	10	12244	1692.45	20722425	20722425			11	10801	1755.19	18957857	18957857			13	8744	2601.24	22745274	22745274			14	10906	1938.93	21145948	21145948			13	15495	1881.29	29150648	29150648
	11	9455	1423.8	13462039	13462039			12	9437	1807.06	17053246	17053246			14	8476	2118.41	17955641	17955641			15	11127	2352.26	26173556	26173556			14	17179	1893.96	32536431	32536431
	12	8897	2357.13	20971358	20971358			13	9066	1905.85	17278392	17278392			15	9825	2115.97	20789422	20789422			16	14813	2264.9	33549971	33549971			15	9571	1778.09	17018098	17018098
	13	11843	2177.95	25793525	25793525			14	8639	1938.27	16744731	16744731			16	6880	2386.77	16420970	16420970			17	10360	1589.79	16470181	16470181			16	15473	2769.9	42858715		42858715
	14	11025	1400.62	15441888	15441888			15	10317	1736.54	17915913	17915913			17	9593	1900.58	18232270	18232270			18	11809	1886.1	22272902	22272902			17	15574	2318.52	36108645	36108645
	15	15361	1962.54	30146639	30146639			16	12450	1479.74	18422828	18422828			18	9873	1590.59	15703895	15703895			19	15352	1473.71	22624402	22624402			18	13123	2791.77	36636391	36636391
	16	8628	1816.36	15671531	15671531			17	11555	1880.84	21733097	21733097			19	16278	1887.69	30727848	30727848			20	8143	1537.63	12520965	12520965			19	16738	1616.07	27049715	27049715
	17	9559	1708.95	16335840	16335840			18	9389	1891.72	17761359	17761359			20	5989	3130.98	18751415	18751415			21	14785	1659.68	24538406	24538406			20	16448	1561.67	25686281	25686281
	18	8891	2329.22	20709132	20709132			19	7782	2020.48	15723377	15723377			21	4778	3080.25	14717433	14717433			1	14117	2342.39	33067585	33067585			21	11273	2773.62	31266982	31266982
	19	13768	2016.86	27768062	27768062			20	8993	1556.61	13998550	13998550			22	7843	2173.7	17048371	17048371			2	19227	1655.79	31835842	31835842			22	18420	1657.03	30522555	30522555
	20	11642	2255.18	26254824	26254824			21	7819	1780.28	13919988	13919988			23	7593	2338.78	17758362	17758362			3	11802	2502.4	29533273	29533273			23	16208	1313.14	21283362	21283362
	21	12017	2065.38	24819713	24819713			22	6428	2166.67	13927353	13927353			24	10539	2016.25	21249247	21249247			4	8715	2468.72	21514892	21514892			24	16684	1169.86	19517919	19517919
	22	10025	1753.74	17581275	17581275			23	7357	1811.72	13328856	13328856			25	7442	1856.02	13812484	13812484			5	6082	3242.8	19722708	19722708			25	9087	1332.01	12103935	12103935
	23	12493	2603.44	32524757	32524757			24	9706	2017.32	19580151	19580151			26	9860	2074.22	20451847	20451847			6	6623	2446.11	16200611	16200611			1	14660	2011.62	29490360	29490360
	24	17129	1930.61	33069485	33069485			25	10159	1804.29	18329764	18329764			27	12859	1969.8	25329654	25329654			7	11329	2448.23	27736023	27736023			2	12036	825.897	9940492	9940492
	25	9516	2041.51	19426989	19426989			26	5547	2383.24	13219845	13219845			28	7234	1730.19	12516231	12516231			8	12150	2366.88	28757534	28757534			3	13342	1851.59	24703955	24703955
	26	8086	1732.89	14012193	14012193			27	6733	1852.6	12473567	12473567			29	7518	1986.48	14934343	14934343			9	8850	2016.32	17844447	17844447			4	14092	2156.96	30395843	30395843
	27	10278	1674.65	17212041	17212041			28	4671	2176.89	10168267	10168267			30	7671	1926.4	14777443	14777443			10	10753	2276.6	24480237	24480237			5	14639	1782.51	26094199	26094199
	28	15523	1266.54	19660544	19660544			29	8427	2148.77	18107701	18107701			31	10694	1893.69	20251169	20251169			11	12900	2547.05	32856939	32856939			6	13926	1779.35	24779197	24779197
	29	13466	1900.7	25594866	25594866			30	9476	1480.81	14032135	14032135			32	9551	1682.73	16071737	16071737			12	12724	2008.98	25562212	25562212			7	16609	2220.02	36872370	36872370
	30	9202	2090.67	19238379	19238379			31	8343	1734.15	14468003	14468003			33	9794	1474	14436394	14436394			13	13433	1813.36	24358892	24358892			8	18188	2071.49	37676300	37676300
	31	10233	2278.39	23314776	23314776			32	7353	1435.42	10554614	10554614			34	12931	1364.18	17640165	17640165			14	13546	1937.58	26246500	26246500			9	11026	1697.51	18716697	18716697
	32	8968	2085.91	18706415	18706415			33	7699	1597.35	12297983	12297983			35	14851	1679.99	24949504	24949504			15	14893	2596.55	38670463		38670463		10	14845	1890.74	28068085	28068085
	33	10252	1929.06	19776687	19776687			34	6447	1811.43	11678308	11678308			36	7161	1605.72	11498594	11498594			16	12181	2479.46	30202351	30202351			11	14882	1829.88	27232279	27232279
	34	12536	1303.98	16346726	16346726			35	5731	1768.39	10134657	10134657			1	5504	2655.68	14616844	14616844			17	12154	2266.59	27548160	27548160			12	19320	1437.93	27780844	27780844
	35	9948	1417.56	14101842	14101842			1	12656	1730.08	21895914	21895914			2	9827	2655.98	26100297	26100297			18	12144	2718.35	33011645	33011645			13	21096	891.711	18811526	18811526
	36	9830	1968.89	19354165	19354165			2	15589	1623.85	25314178	25314178			3	7152	2595.57	18563486	18563486			19	10707	2231.74	23895216	23895216			14	13368	1613.53	21569643	21569643
	37	10713	1439.84	15424961	15424961			3	11703	1757.81	20571700	20571700			4	8453	2257.72	19084518	19084518			20	10751	2395.44	25753393	25753393			15	12685	957.167	12141668	12141668
	38	12704	1518.47	19290675	19290675			4	12101	1678.89	20316297	20316297			5	10068	2286.86	23024069	23024069			21	12260	2367.05	29020037	29020037			16	17188	648.024	11138231	11138231
	39	9926	1303.97	12943239	12943239			5	9795	2060.68	20184311	20184311			6	10621	2145.88	22791357	22791357			22	17653	1605.11	28335080	28335080			17	14046	1916.6	26920617	26920617
	40	7698	1722.42	13259203	13259203			6	17513	1347	23590084	23590084			7	12076	2073.08	25034539	25034539			23	13523	1530.6	20698335	20698335			18	9961	981.078	9772518	9772518
	41	10769	1667.8	17960534	17960534			7	10156	1715.69	17424558	17424558			8	11030	2066.57	22794233	22794233			24	11192	1409.8	15778497	15778497
	42	10691	1425.91	15244368	15244368			8	10868	1754.4	19066786	19066786			9	9673	2159.87	20892432	20892432
	43	8080	2006.62	16213472	16213472			9	10605	2121.26	22495934	22495934			10	11145	2073.72	23111608	23111608
	44	10295	1837.07	18912593	18912593			10	10483	2093.2	21943013	21943013			11	8505	2313.07	19672683	19672683
	45	12441	1608.29	20008722	20008722			11	7444	2449.4	18233335	18233335			12	11361	2483.33	28213080	28213080
	46	9200	1465.44	13482036	13482036			12	13115	1568.15	20566266	20566266			13	11231	2072.32	23274198	23274198
	47	10516	1171.73	12321927	12321927			13	13625	1819.94	24796687	24796687			14	10990	2243.73	24658614	24658614
	1	8892	1866.23	16594519	16594519			14	12033	1779.22	21409333	21409333			15	8674	2140.35	18565432	18565432
	2	9224	1750.43	16146011	16146011			15	9994	2540.25	25387256	25387256			16	8448	2150.91	18170928	18170928
	3	13665	2070.88	28298520	28298520			16	11486	2237.06	25694849	25694849			17	5667	2944.53	16686647	16686647
	4	12287	1586.66	19495317	19495317			17	10181	1890.23	19244432	19244432			18	6155	2256.13	13886499	13886499
	5	11436	1664.86	19039278	19039278			18	8047	1782.56	14344236	14344236			19	11092	2076.36	23030985	23030985
	6	9316	1726.99	16088667	16088667			19	10622	1707.87	18141017	18141017			20	12820	1941.99	24896260	24896260
	7	10938	1859.27	20336699	20336699			20	5761	3681.26	21207763	21207763			21	11246	1532.39	17233255	17233255
	8	12222	1939.85	23708820	23708820			21	9315	2101.16	19572291	19572291			22	9612	1797.87	17281097	17281097
	9	12585	1720.72	21655307	21655307			22	10082	2082.38	20994501	20994501			23	8407	1757.29	14773565	14773565
	10	10651	1950.68	20776736	20776736			23	9700	2183.99	21184735	21184735			24	8178	2058.1	16831124	16831124
	11	9774	1547.3	15123346	15123346			24	7732	2850.27	22038308	22038308			25	9110	2091.83	19056554	19056554
	12	9173	2031.34	18633477	18633477			25	13797	1666.19	22988373	22988373			26	5048	2548.35	12864086	12864086
	13	10442	2453.75	25622092	25622092			26	10429	1657.29	17283826	17283826			27	12697	1370.06	17395598	17395598
	14	11508	1613.27	18565556	18565556			27	11033	1438.31	15868870	15868870			28	9122	2186.41	19944426	19944426
	15	9289	1828.03	16980574	16980574			28	5914	2382.03	14087300	14087300			29	5529	2009.26	11109206	11109206
	16	8373	1688.12	14134583	14134583			29	11306	1430.63	16174659	16174659			30	8059	2028.88	16350759	16350759
	17	10578	1996.69	21121004	21121004			30	12437	1298.9	16154465	16154465			31	8582	1771.05	15199176	15199176
	18	9897	1910.9	18912182	18912182			31	12621	1267.63	15998769	15998769
	19	11149	1954.15	21786832	21786832
	20	10778	1613.03	17385209	17385209
	21	9489	1632.72	15492872	15492872
	22	14569	1918.73	27954005	27954005
	23	10735	1964.88	21092929	21092929
	No UV	1h	2h	4h	16h	Control
Average	1.93037e+07	1.87951e+07	1.98961e+07	2.36127e+07	2.19354e+07	#REF!
SD	4.71232e+06	5.61121e+06	5.32053e+06	5.71285e+06	8.23189e+06	#REF!
SEM	473606	578752	551713	697936	1.01328e+06	#REF!
Percentage	100	97.3657	103.069	122.323	113.633	#REF!
SD	24.4115	29.0681	27.5623	29.5946	42.6442	#REF!
SEM	2.45345	2.99815	2.85808	3.61556	5.24914	#REF!

## Sheet: IF CPD
NoVU		area	mean	intden	rawintden		1h		area	mean	intden	rawintden		2h		area	mean	intden	rawintden		4h		area	mean	intden	rawintden		16h		area	mean	intden	rawintden
	1	7832	254.43	1992696	1992696			1	17038	2774.24	47267432		47267432		1	14123	2545.32	35947613	35947613			1	9942	2461.84	24475573	24475573			1	14117	5752.86	81213091		81213091
	2	13550	257.247	3485696	3485696			2	11001	2570.49	28277988	28277988			2	13202	2877.58	37989821	37989821			2	8630	2630.95	22705143	22705143			2	7528	2675.46	20140848	20140848
	3	10775	264.693	2852070	2852070			3	15914	1921.01	30570996	30570996			3	16708	2460.36	41107766	41107766			3	10639	2010.16	21386064	21386064			3	7178	2400.55	17231116	17231116
	4	7845	275.785	2163532	2163532			4	13510	1898.07	25642983	25642983			4	11889	2539.74	30194925	30194925			4	9020	1989.73	17947393	17947393			4	5105	3026.7	15451323	15451323
	5	10019	340.053	3406996	3406996			5	16075	2069.73	33270887	33270887			5	10168	3276.93	33319871	33319871			5	15275	2904.53	44366766	44366766			5	12086	5086.63	61477000		61477000
	6	9808	293.277	2876461	2876461			6	17165	1480.82	25418231	25418231			6	12811	2661.93	34101986	34101986			6	15585	2563.06	39945238	39945238			6	6812	3821.88	26034613	26034613
	7	10390	253.496	2633825	2633825			7	10383	2957.56	30708373	30708373			7	6015	2209.88	13292407	13292407			7	11620	2099.75	24399092	24399092			7	12185	2772.32	33780754	33780754
	8	13337	300.282	4004861	4004861			8	17394	1893.38	32933535	32933535			8	10961	2905.05	31842260	31842260			8	11933	3730.27	44513306	44513306			8	7760	3474.17	26959548	26959548
	9	9164	255.12	2337917	2337917			9	8762	1820.61	15952167	15952167			9	10422	3263.19	34008974	34008974			9	8356	2503.61	20920195	20920195			9	15066	2360.11	35557451	35557451
	10	11159	290.09	3237116	3237116			10	17939	1894.82	33991165	33991165			10	8359	1640.93	13716563	13716563			10	12205	3895.6	47545834	47545834			10	10069	2381.08	23975086	23975086
	11	14982	365.156	5470771	5470771			11	8080	1957.34	15815293	15815293			11	8193	1728.51	14161696	14161696			11	8687	2282.63	19829207	19829207			11	10596	4429.24	46932186	46932186
	12	14355	263.564	3783464	3783464			12	10768	1353.84	14578188	14578188			12	9792	1954.43	19137806	19137806			12	14035	3366.79	47252867	47252867			12	8616	2413.59	20795536	20795536
	13	11556	208.434	2408658	2408658			13	19721	1688.23	33293636	33293636			13	11749	2515.39	29553361	29553361			13	9669	2324.06	22471336	22471336			13	8193	2595.49	21264869	21264869
	14	11721	208.842	2447842	2447842			14	13028	1990.19	25928206	25928206			14	8890	3587.41	31892047	31892047			14	7673	2276.39	17466778	17466778			14	7049	3826.24	26971204	26971204
	15	15336	280.443	4300868	4300868			15	11772	2197.19	25865359	25865359			15	10241	3442.5	35254685	35254685			15	11159	2089.43	23315959	23315959			15	6983	3983.67	27817960	27817960
	16	12595	269.261	3391336	3391336			16	13226	2077.3	27474399	27474399			16	13397	2858.84	38299926	38299926			16	12756	2038.14	25998572	25998572			16	14832	2978.2	44172710	44172710
	17	11674	324.015	3782549	3782549			17	8996	2104.58	18932782	18932782			17	9236	1550.76	14322832	14322832			17	19592	2254.01	44160579	44160579			17	8217	5493.67	45141498	45141498
	18	8715	302.793	2638842	2638842			18	9564	1567.83	14994739	14994739			18	8055	1707.11	13750752	13750752			18	10996	2179.97	23970921	23970921			18	14833	3230.52	47918261	47918261
	19	9079	218.912	1987506	1987506			19	6138	2418.31	14843575	14843575			19	8906	1996.22	17778297	17778297			19	15189	3269.28	49657066	49657066			19	10532	5187.12	54630765		54630765
	20	8362	233.645	1953737	1953737			20	6585	414.748	2731115	2731115			20	8858	3290.69	29148949	29148949			20	11641	2591.19	30164045	30164045			20	11799	3142.51	37078448	37078448
	21	11245	209.72	2358306	2358306			21	8788	1863.08	16372783	16372783			21	7580	1697.95	12870430	12870430			21	5674	3806.32	21597089	21597089			21	12946	2128.32	27553217	27553217
	22	9004	284.912	2565347	2565347			22	9347	1172.99	10963909	10963909			22	13089	1817.67	23791547	23791547			22	13737	2616.52	35943165	35943165			22	9986	2219.17	22160609	22160609
	23	9003	186.781	1681592	1681592			23	6012	1153.83	6936830	6936830			23	9355	1964.28	18375813	18375813			23	13121	2481.49	32559606	32559606			23	13569	1741.94	23636417	23636417
	24	10783	166.41	1794402	1794402			24	12917	1481.66	19138653	19138653			24	13522	2935.26	39690568	39690568			24	6600	1622.01	10705238	10705238			24	11107	1607.45	17853998	17853998
	25	6300	211.223	1330703	1330703			25	8022	1255.52	10071803	10071803			25	8479	1728.07	14652268	14652268			25	8594	1511.81	12992527	12992527			25	14558	1967.28	28639663	28639663
	26	5536	146.781	812579	812579			26	8636	927.286	8008046	8008046			26	10303	2686.12	27675123	27675123			1	14323	3195.3	45766325	45766325			26	10083	1220.23	12303556	12303556
	27	12180	194.369	2367409	2367409			27	9704	1504.61	14600710	14600710			1	8679	4324.15	37529309	37529309			2	9782	2432.28	23792551	23792551			1	16221	471.074	7641285	7641285
	28	9026	151.018	1363089	1363089			28	12787	1283.18	16408041	16408041			2	7632	2087.01	15928033	15928033			3	9386	4361.1	40933292	40933292			2	15454	422.733	6532915	6532915
	29	9469	83.648	792061	792061			1	14344	3139.9	45038767		45038767		3	15619	2006.34	31336993	31336993			4	9801	4069.38	39883942	39883942			3	12030	405.864	4882543	4882543
	1	11290	294.513	3325047	3325047			2	8358	2146.47	17940199	17940199			4	9191	1949	17913271	17913271			5	10020	2179.85	21842123	21842123			4	11508	1947.25	22408920	22408920
	2	11174	220.782	2467022	2467022			3	8823	2307.9	20362594	20362594			5	9152	2134.73	19537014	19537014			6	10243	3601.18	36886931	36886931			5	11894	449.533	5346751	5346751
	3	12223	261.779	3199720	3199720			4	8934	1780.9	15910583	15910583			6	9653	2038.49	19677509	19677509			7	11467	3555.35	40769202	40769202			6	16278	2876.95	46830994	46830994
	4	12738	339.813	4328538	4328538			5	8229	1639.73	13493376	13493376			7	13228	2677.59	35419089	35419089			8	11061	4267.91	47207372	47207372			7	13879	3228.6	44809712	44809712
	5	9426	240.045	2262665	2262665			6	8950	2523.94	22589293	22589293			8	9257	3934.39	36420634	36420634			9	11093	3789.74	42039579	42039579			8	6853	368.178	2523124	2523124
	6	10131	248.809	2520682	2520682			7	6811	1632.32	11117730	11117730			9	10379	4100.02	42554160	42554160			10	14009	3322.31	46542267	46542267			9	17062	3139.76	53570628		53570628
	7	7516	315.577	2371879	2371879			8	8159	1598.02	13038237	13038237			10	10963	3206.6	35153938	35153938			11	11284	1899.8	21437392	21437392			10	12461	448.833	5592909	5592909
	8	11355	249.366	2831553	2831553			9	9250	1559.17	14422335	14422335			11	5493	3344.08	18369055	18369055			12	13351	2963.04	39559552	39559552			11	9444	306.378	2893438	2893438
	9	9304	277.13	2578414	2578414			10	9544	1625.1	15509975	15509975			12	8709	2258.03	19665163	19665163			13	16011	2202.03	35256661	35256661			12	6981	348.879	2435521	2435521
	10	12244	244.989	2999648	2999648			11	10801	1633.08	17638876	17638876			13	8744	2388.34	20883609	20883609			14	10906	3130.71	34143551	34143551			13	15495	288.016	4462804	4462804
	11	9455	176.09	1664930	1664930			12	9437	1874.65	17691105	17691105			14	8476	4260.04	36108069	36108069			15	11127	3329.19	37043895	37043895			14	17179	306.377	5263255	5263255
	12	8897	572.362	5092309	5092309			13	9066	1925.08	17452766	17452766			15	9825	1821.83	17899493	17899493			16	14813	3342.19	49507822	49507822			15	9571	236.341	2262023	2262023
	13	11843	241.676	2862170	2862170			14	8639	2013.87	17397860	17397860			16	6880	2961.98	20378431	20378431			17	10360	2142.72	22198537	22198537			16	15473	492.74	7624170	7624170
	14	11025	199.01	2194089	2194089			15	10317	1812.06	18695035	18695035			17	9593	2075.23	19907718	19907718			18	11809	3193.4	37710850	37710850			17	15574	373.555	5817742	5817742
	15	15361	274.927	4223154	4223154			16	12450	1455.85	18125342	18125342			18	9873	1900.59	18764500	18764500			19	15352	1591.94	24439527	24439527			18	13123	522.78	6860437	6860437
	16	8628	295.932	2553300	2553300			17	11555	1512.13	17472655	17472655			19	16278	2126.62	34617099	34617099			20	8143	1660.63	13522497	13522497			19	16738	1840.87	30812538	30812538
	17	9559	276.019	2638462	2638462			18	9389	1507.35	14152499	14152499			20	5989	2162.76	12952769	12952769			21	14785	2578.77	38127101	38127101			20	16448	1722.23	28327304	28327304
	18	8891	368.167	3273375	3273375			19	7782	2460.07	19144228	19144228			21	4778	2203.35	10527594	10527594			1	14117	3167.19	44711183	44711183			21	11273	548.422	6182365	6182365
	19	13768	277.16	3815938	3815938			20	8993	1866.01	16781041	16781041			22	7843	1852.68	14530561	14530561			2	19227	2074.96	39895176	39895176			22	18420	2421.98	44612940	44612940
	20	11642	305.783	3559927	3559927			21	7819	1645.56	12866610	12866610			23	7593	1487.23	11292510	11292510			3	11802	3223.84	38047806	38047806			23	16208	2065.18	33472372	33472372
	21	12017	251.575	3023178	3023178			22	6428	1820.63	11703012	11703012			24	10539	3045.91	32100849	32100849			4	8715	2545.51	22184072	22184072			24	16684	2088.23	34840039	34840039
	22	10025	273.619	2743026	2743026			23	7357	1597.15	11750207	11750207			25	7442	1840.42	13696374	13696374			5	6082	3310.13	20132226	20132226			25	9087	1640.05	14903129	14903129
	23	12493	381.581	4767094	4767094			24	9706	1381.18	13405740	13405740			26	9860	2520.22	24849319	24849319			6	6623	3095.76	20503242	20503242			1	14660	1918.89	28130865	28130865
	24	17129	306.338	5247262	5247262			25	10159	1700.37	17274079	17274079			27	12859	2254.15	28986075	28986075			7	11329	2357.75	26710949	26710949			2	12036	2461.64	29628306	29628306
	25	9516	274.019	2607562	2607562			26	5547	2133.68	11835545	11835545			28	7234	1506.38	10897190	10897190			8	12150	4331.16	52623620	52623620			3	13342	2316.5	30906752	30906752
	26	8086	233.064	1884554	1884554			27	6733	1480.67	9969362	9969362			29	7518	1700.12	12781476	12781476			9	8850	2577.31	22809223	22809223			4	14092	1945.83	27420621	27420621
	27	10278	242.283	2490180	2490180			28	4671	1658.55	7747076	7747076			30	7671	1350.16	10357111	10357111			10	10753	3747.59	40297866	40297866			5	14639	1376.79	20154796	20154796
	28	15523	154.838	2403550	2403550			29	8427	2162.35	18222136	18222136			31	10694	1895.02	20265340	20265340			11	12900	3032.12	39114403	39114403			6	13926	1471.76	20495782	20495782
	29	13466	226.811	3054236	3054236			30	9476	1224.99	11607967	11607967			32	9551	1948.87	18613679	18613679			12	12724	2455.48	31243563	31243563			7	16609	1764.86	29312497	29312497
	30	9202	287.34	2644103	2644103			31	8343	1276.23	10647564	10647564			33	9794	1282.22	12558102	12558102			13	13433	2214.89	29752663	29752663			8	18188	2459.53	44733882	44733882
	31	10233	356.912	3652280	3652280			32	7353	1153.83	8484144	8484144			34	12931	1295.85	16756594	16756594			14	13546	2420.87	32793086	32793086			9	11026	1855.12	20454523	20454523
	32	8968	349.876	3137689	3137689			33	7699	1100.35	8471561	8471561			35	14851	1257.36	18673069	18673069			15	14893	2352.39	35034077	35034077			10	14845	1623.31	24097966	24097966
	33	10252	257.024	2635012	2635012			34	6447	1378.5	8887200	8887200			36	7161	1545.72	11068894	11068894			16	12181	3371.2	41064605	41064605			11	14882	2967.88	44168025	44168025
	34	12536	150.009	1880507	1880507			35	5731	1174.93	6733503	6733503			1	5504	2543.39	13998801	13998801			17	12154	3258.35	39601944	39601944			12	19320	2749.54	53121044		53121044
	35	9948	151.296	1505096	1505096			1	12656	2560.74	32408725	32408725			2	9827	4368.52	42929420	42929420			18	12144	3159.82	38372858	38372858			13	21096	3626.35	76501420		76501420
	36	9830	216.211	2125352	2125352			2	15589	2156.01	33610002	33610002			3	7152	2127.04	15212587	15212587			19	10707	1913.06	20483087	20483087			14	13368	1417.51	18949331	18949331
	37	10713	79.588	852628	852628			3	11703	1676.76	19623160	19623160			4	8453	1913.62	16175833	16175833			20	10751	1841.87	19801991	19801991			15	12685	1474.52	18704261	18704261
	38	12704	121.235	1540165	1540165			4	12101	2085.34	25234753	25234753			5	10068	2071.39	20854711	20854711			21	12260	2534.95	31078519	31078519			16	17188	2175.1	37385612	37385612
	39	9926	115.985	1151264	1151264			5	9795	2771.05	27142475	27142475			6	10621	2036.04	21624741	21624741			22	17653	1880.81	33201906	33201906			17	14046	1104.25	15510349	15510349
	40	7698	140.876	1084466	1084466			6	17513	1958.42	34297807	34297807			7	12076	2307.6	27866611	27866611			23	13523	2489.39	33663989	33663989			18	9961	1466.12	14604049	14604049
	41	10769	152.006	1636949	1636949			7	10156	2207.55	22419929	22419929			8	11030	3240.57	35743473	35743473			24	11192	2311.88	25874543	25874543
	42	10691	209.842	2243422	2243422			8	10868	1770.42	19240924	19240924			9	9673	2046.87	19799345	19799345
	43	8080	167.916	1356763	1356763			9	10605	2396.57	25415631	25415631			10	11145	3160.58	35224700	35224700
	44	10295	243.119	2502910	2502910			10	10483	2382.37	24974353	24974353			11	8505	2494.44	21215207	21215207
	45	12441	166.563	2072207	2072207			11	7444	2027.61	15093561	15093561			12	11361	4185.95	47556544	47556544
	46	9200	69.946	643500	643500			12	13115	2556.11	33523398	33523398			13	11231	2060.94	23146457	23146457
	47	10516	40.852	429597	429597			13	13625	2332.27	31777224	31777224			14	10990	3896.42	42821678	42821678
	1	8892	314.782	2799038	2799038			14	12033	2241.37	26970372	26970372			15	8674	2289.02	19854972	19854972
	2	9224	284.646	2625574	2625574			15	9994	1747.13	17460801	17460801			16	8448	2223.81	18786725	18786725
	3	13665	336.328	4595928	4595928			16	11486	2371.55	27239586	27239586			17	5667	2938.84	16654385	16654385
	4	12287	257.27	3161077	3161077			17	10181	2162.41	22015542	22015542			18	6155	2109.78	12985687	12985687
	5	11436	286.725	3278982	3278982			18	8047	1761.65	14176039	14176039			19	11092	1868.19	20721999	20721999
	6	9316	224.083	2087560	2087560			19	10622	2107.33	22384072	22384072			20	12820	3338.98	42805734	42805734
	7	10938	268.879	2940997	2940997			20	5761	1991.76	11474506	11474506			21	11246	1731.73	19475095	19475095
	8	12222	283.622	3466431	3466431			21	9315	1886.65	17574172	17574172			22	9612	1920.44	18459290	18459290
	9	12585	277.355	3490507	3490507			22	10082	3146.34	31721408	31721408			23	8407	1656.63	13927334	13927334
	10	10651	336.1	3579802	3579802			23	9700	2318.3	22487563	22487563			24	8178	1729.18	14141265	14141265
	11	9774	225.198	2201082	2201082			24	7732	1573.54	12166574	12166574			25	9110	1873.39	17066628	17066628
	12	9173	330.645	3033002	3033002			25	13797	2191.85	30241016	30241016			26	5048	2157.11	10889067	10889067
	13	10442	326.369	3407946	3407946			26	10429	2004.95	20909651	20909651			27	12697	1251.82	15894359	15894359
	14	11508	212.528	2445777	2445777			27	11033	1448.42	15980422	15980422			28	9122	2820.23	25726127	25726127
	15	9289	248.34	2306830	2306830			28	5914	2307.72	13647873	13647873			29	5529	1717.93	9498418	9498418
	16	8373	253.58	2123225	2123225			29	11306	1251.77	14152475	14152475			30	8059	2668.75	21507458	21507458
	17	10578	278.375	2944653	2944653			30	12437	1305.14	16232038	16232038			31	8582	2726.05	23394967	23394967
	18	9897	315.867	3126139	3126139			31	12621	853.07	10766598	10766598
	19	11149	333.035	3713003	3713003
	20	10778	262.432	2828488	2828488
	21	9489	262.553	2491369	2491369
	22	14569	349.777	5095894	5095894
	23	10735	266.932	2865511	2865511
	No UV	1h	2h	4h	16h
Average	2.71625e+06	1.88547e+07	2.3342e+07	3.20557e+07	2.30376e+07
SD	1.0101e+06	7.71219e+06	9.82458e+06	1.04552e+07	1.34695e+07
SEM	101519	804052	1.01876e+06	1.24964e+06	1.697e+06
Percentage	100	694.144	859.349	1180.15	848.14
SD	37.1873	283.928	361.697	384.914	495.886
SEM	3.73746	29.6016	37.5062	46.006	62.4758
