# Supplementary material for: XAB2 dynamics during DNA damage-dependent transcription inhibition
Source: eLife. 2022 Jul 26;11:e77094. doi: 10.7554/eLife.77094 (PMC9436415; doi:10.7554/eLife.77094)
Supplement: Figure 2—figure supplement 2—source data 1. [file elife-77094-fig2-figsupp2-data1.xlsx]

## Sheet: Recap
siMock	NoUV			3h			40h
Mean	2.34231e+06	100		1.03447e+06	44.1643		3.31805e+06	141.657
SD	1.81399e+06	77.4446		412764	17.6221		1.42144e+06	60.6854
SEM	230377	9.83548		62946	2.68735		216767	9.25443
siXAB2	0h			3h			40h
Mean	3.59026e+06	100		1.76534e+06	49.1703		3.30912e+06	92.1694
SD	1.64665e+06	45.8643		1.5448e+06	43.0275		1.28101e+06	35.6801
SEM	286644	7.98395		398865	11.1097		202545	5.64152
siCSB	0h			3h			40h
Mean	2.91828e+06	100		700212	23.994		1.15332e+06	39.5205
SD	1.08172e+06	37.0669		357087	12.2362		645920	22.1335
SEM	150007	5.14025		50499.8	1.73046		99667.6	3.41528

## Sheet: siMock
No UV								3h post UV								40h post UV
Image	Area	Mean	Min	Max	IntDen	RawIntDen		Image	Area	Mean	Min	Max	IntDen	RawIntDen		Image	Area	Mean	Min	Max	IntDen	RawIntDen
1	1763	1082.99	879	1552	1909313	1909313		1	875	1120.41	940	1619	980359	980359		1	2078	1945.05	1346	3506	4041810	4041810
2	1324	917.296	765	1275	1214500	1214500		2	1007	1090.06	950	1520	1097685	1097685		2	1763	2112.19	1381	3552	3723794	3723794
3	1223	1093.21	889	1511	1337001	1337001		3	324	846.972	772	1073	274419	274419		3	1512	1742.31	1318	2787	2634378	2634378
4	1186	1001.39	837	1323	1187648	1187648		4	1222	1137.86	898	1588	1390463	1390463		4	2510	1880.06	1248	3368	4718960	4718960
5	1790	920.934	783	1399	1648472	1648472		5	924	954.085	807	1445	881575	881575		5	2411	1691.62	1160	3225	4078485	4078485
6	1121	1061.37	888	1382	1189797	1189797		6	374	967.468	804	1486	361833	361833		6	2187	1755.07	1179	3047	3838327	3838327
7	1215	958.56	843	1323	1164651	1164651		7	801	1030.29	862	1521	825265	825265		7	1084	1913.41	1395	3211	2074137	2074137
8	883	993.658	816	1406	877400	877400		8	398	1154.73	978	1766	459582	459582		8	2153	1581.96	1059	2416	3405964	3405964
9	1204	970.939	802	1369	1169010	1169010		9	668	7059.27	4150	9809	4715589		4715589	9	2721	1954.86	1315	3209	5319184	5319184
10	1554	1204.8	932	1820	1872264	1872264		10	553	990.094	856	1456	547522	547522		10	2132	1630.48	1168	3332	3476193	3476193
11	964	967.413	810	1459	932586	932586		11	1085	1047.25	848	1534	1136265	1136265		1	2431	1626.83	1195	2419	3954824	3954824
12	1087	1286.09	1015	1775	1397980	1397980		12	1214	1086.1	877	1555	1318530	1318530		2	1175	1660.15	1199	2617	1950682	1950682
13	1647	882.042	744	1354	1452723	1452723		1	1040	913.945	795	1241	950503	950503		3	2934	1390.1	1006	2539	4078561	4078561
14	1094	1019.39	839	1427	1115213	1115213		2	878	1192.75	856	1995	1047237	1047237		4	825	2004.06	1447	3098	1653345	1653345
15	1680	1067.5	837	1586	1793395	1793395		3	1114	1154.32	899	1705	1285908	1285908		5	1169	1710.06	1262	2395	1999062	1999062
16	933	1112.92	872	1501	1038355	1038355		4	424	825.351	733	1189	349949	349949		6	2246	2262.43	1416	3703	5081412	5081412
17	1505	1005.55	825	1391	1513357	1513357		5	502	896.755	768	1295	450171	450171		1	1230	1844.47	1394	2942	2268696	2268696
18	799	1018.46	873	1344	813752	813752		6	1086	1037.36	812	1539	1126571	1126571		2	3012	1757.81	1163	2889	5294535	5294535
19	2081	1034.18	838	1606	2152137	2152137		7	812	1149.14	901	1618	933105	933105		3	1806	1894.23	1329	3231	3420982	3420982
1	1374	1299.85	1009	1974	1785991	1785991		8	1134	957.635	764	1619	1085958	1085958		4	1448	1585.38	1135	2504	2295634	2295634
2	1396	1573.06	1152	2524	2195986	2195986		9	855	920.787	792	1262	787273	787273		1	1340	1633.38	1154	2506	2188724	2188724
3	2042	1323.86	1042	1944	2703319	2703319		10	1278	1009.9	793	1513	1290654	1290654		2	1102	1683.72	1195	2342	1855464	1855464
4	1346	1391.61	1154	2268	1873108	1873108		11	738	1030.67	887	1498	760632	760632		3	745	1383.27	1186	1696	1030536	1030536
5	525	1338.32	1100	1775	702618	702618		12	1077	942.734	806	1264	1015324	1015324		4	853	1326.36	1083	1847	1131383	1131383
6	581	1285.7	1031	1760	746992	746992		13	688	1017.8	803	1573	700248	700248		5	1763	1339.2	1005	2118	2361011	2361011
7	1421	1599.7	1089	2788	2273175	2273175		14	685	908.857	784	1336	622567	622567		6	910	1639.82	1276	2311	1492236	1492236
8	1398	1467.63	1114	2208	2051745	2051745		15	761	908.222	770	1370	691157	691157		7	1	1683	1683	1683	1683		1683
9	2216	1245.98	908	1860	2761097	2761097		16	1317	1108.69	918	1693	1460145	1460145		8	1833	2458.53	1669	4365	4506486	4506486
10	509	1168.46	950	1649	594744	594744		17	581	923.071	789	1247	536304	536304		9	1425	1859.87	1382	2738	2650318	2650318
11	1711	1417.45	1079	2154	2425264	2425264		1	1935	825.685	724	1248	1597701	1597701		10	2332	1969.76	1295	2982	4593490	4593490
12	2275	1202.09	834	2111	2734752	2734752		2	1878	863.579	756	1368	1621802	1621802		1	2098	1969.87	1413	3153	4132782	4132782
13	1079	1540.97	1139	2457	1662704	1662704		3	1845	877.214	747	1235	1618459	1618459		2	1579	1730.62	1332	2478	2732642	2732642
14	2981	1232.48	804	2322	3674024	3674024		4	1128	1212.32	1058	1578	1367494	1367494		3	4879	1388.39	929	2379	6773952	6773952
15	1279	1527.38	1129	2460	1953518	1953518		5	1578	950.894	811	1605	1500510	1500510		4	1213	1363.26	1093	2035	1653628	1653628
16	1694	1297.12	896	2131	2197327	2197327		6	812	1119.69	920	1556	909192	909192		5	2862	1766.51	1169	2921	5055759	5055759
17	713	1948.07	1743	2460	1388974	1388974		7	2127	1022.4	844	1615	2174637	2174637		6	1696	1539.97	1083	2265	2611785	2611785
18	1387	1444.65	982	2525	2003733	2003733		8	1388	881.79	774	1406	1223925	1223925		7	4186	1099.19	777	2730	4601199	4601199
19	2175	1140.56	892	1769	2480719	2480719		9	1130	874.467	769	1114	988148	988148		8	1142	1870.78	1426	2868	2136431	2136431
20	1226	1304.51	920	2024	1599334	1599334		10	839	1131.64	937	1571	949447	949447		9	925	1763.87	1138	2804	1631580	1631580
21	1426	1722.12	1294	2909	2455748	2455748		11	1814	815.863	769	964	1479975	1479975		10	3994	1699.35	1079	3289	6787217	6787217
22	905	958.898	815	1336	867803	867803		12	1195	1201.01	942	1787	1435211	1435211		11	1781	1883.54	1326	3115	3354581	3354581
23	3445	1165.96	827	2313	4016720	4016720		13	892	887.464	785	1119	791618	791618		12	1854	1599.93	1093	2803	2966278	2966278
24	1316	1073.18	868	1555	1412308	1412308		14	1578	950.894	811	1605	1500510	1500510		13	2045	1584.09	1090	2842	3239465	3239465
25	2512	1268.17	971	2013	3185635	3185635		15	957	999.171	870	1391	956207	956207		14	3181	1219.82	862	2465	3880244	3880244
26	3747	1264.26	850	2464	4737171	4737171
27	2083	1795.14	1241	2798	3739271	3739271
28	1897	1370.1	1071	2211	2599074	2599074
29	2484	1156.5	863	1815	2872754	2872754
1	1884	1308.65	959	1889	2465495	2465495
2	2389	1096.98	864	1543	2620696	2620696
3	1830	1184.63	888	1710	2167872	2167872
4	1775	1318.07	1003	1907	2339568	2339568
5	3681	1026.4	788	1922	3778189	3778189
6	3992	1129.97	862	1726	4510858	4510858
7	3141	796.793	680	1223	2502726	2502726
8	1948	1054.08	889	1440	2053346	2053346
9	2783	1596.58	1146	2502	4443292	4443292
10	2618	1212.78	863	1996	3175068	3175068
11	1949	7145.06	4961	9726	13925731	13925731
12	2288	1056.38	841	1685	2417005	2417005
13	2283	2037.75	1414	3345	4652193	4652193
14	2397	1124.76	902	1921	2696049	2696049
	Mean	2.34231e+06	100						Mean	1.03447e+06	44.1643						Mean	3.31805e+06	141.657
	SD	1.81399e+06	77.4446						SD	412764	17.6221						SD	1.42144e+06	60.6854
	SEM	230377	9.83548						SEM	62946	2.68735						SEM	216767	9.25443
t-test											6.4249e-07								0.00262686

## Sheet: siXAB2
No UV								3h post UV								36h post UV
Image	Area	Mean	Min	Max	IntDen	RawIntDen		Image	Area	Mean	Min	Max	IntDen	RawIntDen		Image	Area	Mean	Min	Max	IntDen	RawIntDen
1	957	2165.24	1496	3459	2072138	2072138		1	517	797.315	758	935	412212	412212		1	2323	1672.03	1223	2661	3884127	3884127
2	1336	1623.1	1389	2356	2168463	2168463		2	3200	988.918	826	1371	3164536	3164536		2	1417	2332.1	1416	3974	3304581	3304581
3	2181	1666.57	1295	2527	3634787	3634787		3	896	1482.63	1127	2412	1328440	1328440		3	1780	1736.12	1141	3085	3090294	3090294
4	1056	1588.6	1333	2162	1677558	1677558		4	254	1027.66	962	1158	261025	261025		4	1034	1723.55	1278	2587	1782150	1782150
5	2228	1528.94	1116	2555	3406487	3406487		1	1017	1092.56	960	1373	1111131	1111131		5	1100	1995.24	1331	3255	2194769	2194769
6	2060	1531.63	1158	2374	3155153	3155153		2	3602	949.782	779	1488	3421116	3421116		6	2282	1780.53	1163	3082	4063161	4063161
7	1578	1280.89	987	1973	2021238	2021238		3	3981	1470.78	1067	2469	5855191	5855191		7	2051	2292.31	1521	4031	4701527	4701527
8	1821	1664.08	1329	2267	3030285	3030285		1	994	959.549	846	1218	953792	953792		8	2996	1997.54	1302	3997	5984635	5984635
9	1352	1269.64	1017	1966	1716559	1716559		2	3486	817.827	743	1066	2850944	2850944		9	2216	1934.5	1293	3440	4286846	4286846
10	1647	1399.39	1119	2141	2304802	2304802		1	702	771.781	722	905	541790	541790		10	1525	1504.63	1060	2512	2294568	2294568
1	1417	2843.15	2412	4126	4028742	4028742		2	479	940.543	846	1218	450520	450520		11	2423	1733.89	1161	3187	4201224	4201224
2	813	4582.66	3743	6274	3725706	3725706		3	2641	871.248	812	1259	2300965	2300965		12	1744	1869.26	1184	3169	3259988	3259988
3	1502	3950.41	3033	5238	5933510	5933510		4	493	794.742	756	923	391808	391808		13	1730	1798.45	1141	3104	3111320	3111320
4	200	3137.53	2964	3564	627505	627505		5	1528	1044.74	814	1852	1596360	1596360		14	1444	1431.38	1061	2204	2066912	2066912
5	1645	3015.63	2121	4489	4960718	4960718		6	2087	881.777	800	1397	1840269	1840269		15	844	1408.89	1003	2322	1189103	1189103
6	1881	2468.75	2052	3596	4643724	4643724										16	2930	1770.93	1166	2967	5188840	5188840
7	1786	2748.08	2046	3769	4908075	4908075										17	2775	1815.28	1146	3182	5037411	5037411
8	843	2316.07	1979	2863	1952446	1952446										18	2411	1396.25	1002	2262	3366351	3366351
9	1069	2558.16	2161	3406	2734673	2734673										19	1126	1452.98	1098	2294	1636058	1636058
10	1179	2635.51	2238	3421	3107263	3107263										20	1738	1404.25	1008	2452	2440586	2440586
11	1823	3147.94	2472	4764	5738691	5738691										21	939	1665.03	1228	2772	1563463	1563463
12	2041	2521.75	1974	3326	5146884	5146884										22	996	1695.82	1253	2793	1689034	1689034
13	2665	2969.68	2050	4632	7914190	7914190										23	2450	1842.59	1215	2928	4514351	4514351
14	1853	2711.61	2039	4057	5024622	5024622										1	1532	1598.54	1232	2575	2448961	2448961
1	1369	1594.6	1246	2607	2183009	2183009										2	1104	2222.44	1681	3244	2453573	2453573
2	404	2032.73	1686	2754	821223	821223										3	1968	1805.99	1287	2780	3554192	3554192
3	2055	2056.77	1556	3458	4226669	4226669										4	895	1885.93	1314	2678	1687912	1687912
4	1642	1676.15	1327	2380	2752238	2752238										5	3721	1532.38	1128	2610	5701972	5701972
5	3617	1707.98	1316	2882	6177773	6177773										6	1384	1707.61	1233	2676	2363331	2363331
6	1791	1813.79	1312	2752	3248501	3248501										7	1825	2327.76	1687	3732	4248155	4248155
7	2447	1861.06	1342	2755	4554018	4554018										8	3086	1251.33	840	2826	3861603	3861603
8	2250	1917.23	1379	3514	4313762	4313762										9	1131	1693.2	1210	2443	1915010	1915010
9	2245	2034.35	1451	3077	4567110	4567110										10	2391	1633.45	1170	2805	3905573	3905573
																11	2567	1477.7	1033	2701	3793249	3793249
																12	2373	1693.04	1187	2807	4017581	4017581
																13	1815	1499.09	1012	2498	2720849	2720849
																14	1908	1777.78	1290	2654	3392012	3392012
																15	2714	1501.8	1116	2396	4075897	4075897
																16	3546	1698.57	1211	2818	6023136	6023136
																17	2463	1260.56	976	2185	3104769	3104769
																18	2261	1341.29	974	2474	3032655	3032655
																19	1030	1495.24	1243	1995	1540099	1540099
																20	806	1894.46	1331	2875	1526936	1526936
																1	2184	1304.63	1051	2066	2849311	2849311
																2	3437	1638.84	1022	2631	5632702	5632702
																3	2828	1943.8	1327	3036	5497064	5497064
																4	2129	2043.22	1485	2879	4350015	4350015
																5	1966	2335	1797	3197	4590610	4590610
																6	2693	2045.82	1471	2752	5509401	5509401
																7	652	4126.34	2792	5998	2690376	2690376
																8	3389	1449.9	1158	2093	4913705	4913705
																9	2420	1662.92	1293	2336	4024273	4024273
	Mean	3.59026e+06	100						Mean	1.76534e+06	49.1703						Mean	3.30912e+06	92.1694
	SD	1.64665e+06	45.8643						SD	1.5448e+06	43.0275						SD	1.28101e+06	35.6801
	SEM	286644	7.98395						SEM	398865	11.1097						SEM	202545	5.64152
t-test											0.000867094								0.718348

## Sheet: siCSB
No UV								3h post UV								36h post UV
Image	Area	Mean	Min	Max	IntDen	RawIntDen		Image	Area	Mean	Min	Max	IntDen	RawIntDen		Image	Area	Mean	Min	Max	IntDen	RawIntDen
1	747.789	1293.12	935	2311	966981	4691443		1	90.691	746.639	677	892	67713.4	328521		1	145.724	890.281	796	1137	129735	629429
2	422.332	1609.89	1070	3088	679907	3298662		2	540.642	745.604	627	956	403105	1955718		2	165.099	968.757	857	1281	159941	775974
3	269.806	2055.45	1388	3862	554572	2690582		3	132.945	561.851	544	635	74695.2	362394		3	142.632	805.087	719	1011	114831	557120
4	449.539	1244.26	931	2187	559344	2713735		4	160.358	732.072	679	867	117394	569552		4	200.963	1344.36	1103	1875	270167	1310753
5	912.476	1388.73	922	2627	1.26718e+06	6147899		5	70.904	604.195	581	691	42839.8	207843		5	84.301	735.57	692	843	62009.6	300848
6	249.194	1258.9	1031	1801	313710	1522006		6	217.04	782.174	711	957	169763	823629		6	120.578	873.74	798	1044	105354	511138
7	722.437	1677.79	1217	2594	1.21209e+06	5880643		7	166.129	664.048	614	785	110318	535223		7	750.262	831.263	764	1078	623665	3025798
8	355.138	1416.12	1108	2102	502919	2439981		8	176.848	677.026	637	835	119730	580888		8	1106.22	971.631	838	1693	1.07484e+06		5214742
9	260.325	1205.59	911	2052	313844	1522659		9	339.061	625.266	593	794	212003	1028563		9	132.533	839.526	789	963	111265	539815
10	563.933	1270.93	1008	2032	716718	3477254		10	178.496	659.602	604	785	117737	571215		10	255.172	861.438	760	1241	219814	1066460
11	305.876	1284.83	942	2041	393000	1906693		11	367.505	775.312	670	1039	284931	1382382		11	135.212	1149.76	956	1562	155461	754239
12	557.75	1195.78	928	2012	666946	3235781		12	135.418	831.927	717	1051	112658	546576		12	199.52	1038.35	841	2673	207172	1005121
13	497.152	1307.06	1000	2041	649809	3152637		1	59.568	651.502	632	741	38808.3	188284		13	292.272	807.814	778	921	236102	1145480
14	304.433	1164.04	945	1783	354374	1719292		2	112.127	650.862	615	773	72979.3	354069		14	169.427	1021.96	892	1370	173149	840054
15	589.904	917.776	757	1360	541400	2626674		3	189.833	693.712	586	974	131689	638909		15	212.712	1547.61	1077	3081	329194	1597131
16	916.392	886.277	701	1538	812177	3940387		4	172.313	647.087	591	796	111502	540965		16	215.803	1110.93	958	1504	239743	1163144
17	447.272	1011.5	812	1438	452417	2194963		5	136.655	709.244	638	879	96921.7	470229		17	195.398	987.662	879	1269	192987	936304
18	590.316	1126.3	874	1700	664871	3225715		6	230.438	718.172	664	874	165494	802916		18	238.888	1314.02	1154	1679	313905	1522951
19	580.01	1050.4	830	1576	609242	2955820		7	230.025	723.044	636	921	166319	806917		19	483.342	1071.28	974	1671	517793	2512142
20	220.75	1234.42	1016	1783	272499	1322066		8	129.647	775.259	691	934	100510	487638		20	184.062	887.984	810	1141	163444	792970
21	414.912	947.964	772	1411	393321	1908252		9	151.289	989.811	868	1261	149748	726521		21	455.929	1055.68	814	2008	481314	2335162
22	264.859	1020.84	861	1381	270378	1311777		10	57.919	783.747	737	916	45393.5	220233		22	228.377	1046.87	908	1756	239081	1159934
23	282.173	1125.13	926	1591	317482	1540307		11	311.854	660.051	616	802	205839	998657		23	340.091	1261.49	1022	1815	429023	2081462
24	438.203	1200.97	925	1830	526269	2553264		12	280.936	839.447	705	1151	235831	1144166		24	110.89	1280.33	1095	1662	141977	688819
25	476.54	907.683	779	1228	432547	2098563		13	122.021	810.586	710	1344	98908.3	479867		25	231.881	934.485	833	1199	216689	1051296
26	542.291	1084.14	879	1770	587921	2852380		14	154.381	707.519	633	929	109227	529932		1	136.655	853.944	789	1191	116696	566165
27	516.939	1092.2	872	1727	564600	2739233		15	324.22	725.561	601	1035	235242	1141308		2	325.457	1052.54	841	1649	342557	1661960
28	499.625	886.748	796	1227	443041	2149476		16	396.567	761.424	635	1001	301956	1464980		3	306.907	959.103	824	1313	294355	1428105
29	480.044	1763.12	1352	2547	846378	4106319		1	181.794	704.271	657	808	128032	621167		4	103.264	1146.91	1098	1276	118435	574602
30	391.208	1186.64	868	1835	464224	2252245		2	145.93	741.082	690	871	108146	524686		5	63.484	1422.79	1248	1748	90324.2	438220
31	653.388	1176.48	864	1871	768698	3729444		3	234.766	725.035	690	841	170214	825815		6	133.151	1632.87	1355	2069	217419	1054836
32	615.668	1205.62	844	1879	742260	3601177		4	15.459	741.853	723	787	11468.1	55639		7	223.43	1983.48	1489	2868	443169	2150094
1	393.269	825.742	655	1163	324739	1575516		5	294.746	742.184	693	862	218756	1061323		8	217.865	899.135	817	1079	195890	950386
2	881.352	932.856	724	1527	822175	3988893		1	238.888	661.263	620	896	157968	766404		9	119.341	1381.65	1141	1939	164888	799976
3	654.831	994.335	747	1549	651121	3159003		2	151.083	663.413	618	820	100231	486282		10	360.085	966.552	857	1365	348040	1688566
4	440.882	1065.54	801	1544	469776	2279184		3	105.531	650.016	616	761	68597.1	332808		11	357.199	762.311	727	989	272297	1321085
5	785.096	911.376	716	2477	715518	3471432		4	151.907	660.422	603	787	100323	486731		12	426.454	961.081	842	1390	409857	1988477
6	386.055	1339.75	1038	1955	517216	2509344		5	322.984	782.997	667	1063	252895	1226956		13	139.953	862.231	795	1039	120672	585455
7	677.503	1103.67	929	1691	747739	3627756		6	127.38	707.631	665	824	90137.8	437316		14	385.643	802.198	760	935	309362	1500912
8	780.355	1359.94	1013	2295	1.06123e+06	5148717		7	285.677	807.458	741	1040	230672	1119137		15	120.578	834.998	773	1054	100682	488474
9	578.568	916.186	733	1392	530076	2571734		8	215.803	812.26	727	1040	175288	850436		16	340.916	1175.12	967	2007	400618	1943654
10	516.321	1017.58	752	1585	525398	2549042		9	293.509	645.685	605	780	189514	919455		17	68.018	895.227	827	1786	60891.8	295425
11	531.573	953.592	737	1460	506904	2459315		10	280.73	624.977	588	734	175450	851218		18	145.93	988.011	898	1248	144181	699512
12	480.869	852.853	670	1348	410110	1989707		11	160.564	690.231	647	816	110827	537690
13	421.301	1003.36	792	1499	422717	2050869		12	240.95	665.923	625	798	160454	778464
14	644.319	1132.92	825	1875	729964	3541521		13	185.711	763.29	708	914	141751	687724
15	694.405	1221.49	913	2360	848205	4115185		14	109.654	766.267	704	900	84024	407654
16	486.434	1280.85	920	2003	623050	3022810		15	230.232	745.364	688	867	171606	832572
17	415.324	1330.62	994	2052	552639	2681204		16	183.237	730.723	696	842	133896	649613
18	534.253	1164.72	904	1758	622255	3018955		17	182.207	750.472	684	897	136741	663417
19	687.809	1290.48	939	1990	887607	4306349
20	382.757	1172.28	910	1731	448698	2176918
	Mean	2.91828e+06	100						Mean	700212	23.994						Mean	1.15332e+06	39.5205
	SD	1.08172e+06	37.0669						SD	357087	12.2362						SD	645920	22.1335
	SEM	150007	5.14025						SEM	50499.8	1.73046						SEM	99667.6	3.41528
t-test											6.15712e-21								1.25793e-15
