# Supplementary material for: XAB2 dynamics during DNA damage-dependent transcription inhibition
Source: eLife. 2022 Jul 26;11:e77094. doi: 10.7554/eLife.77094 (PMC9436415; doi:10.7554/eLife.77094)
Supplement: Figure 2—source data 1. [file elife-77094-fig2-data1.xlsx]

## Sheet: PLA XAB2-64PP
	NoUV	1h	2h	4h	16h		No UV	1h	2h	4h	16h
04.02.2022	7734723	29107915	10993931	3437237	18543449		118.986	447.777	169.123	52.8762	285.26
	12967216	24978074	12105191	13283237	14700320		199.479	384.246	186.218	204.341	226.14
	5464409	29061394	20095013	2212941	27480569		84.0609	447.062	309.129	34.0424	422.743
	6816233	31005544	24047673	7594346	22353761		104.856	476.969	369.934	116.826	343.876
	12569609	45120644	17805848	16539332	12004750		193.363	694.107	273.914	254.43	184.673
	11132039	22815273	18615092	8945647	10720859		171.248	350.975	286.362	137.614	164.923
	9782878	31171487	21660659	8736050	16474259		150.493	479.522	333.213	134.39	253.429
	10688439	34583480	23162883	5479748	17802425		164.424	532.01	356.323	84.2969	273.861
	7936860	41522825	14954335	5207025	11182545		122.095	638.76	230.048	80.1015	172.025
	10323921	32934553	7244974	719622	25092698			506.644	111.452	11.0702	386.01
	6724405	20463787	12671926	7494042	11798493		103.444	314.802	194.937	115.283	181.5
	14357335	51576711	18486772	1427143	12209562		220.864	793.422	284.388	21.9542	187.824
	7973431	33218765	10964595	13500870	8544843		122.658	511.016	168.672	207.689	131.448
	6986160	43915079	16914254	19498296	17464055		107.471	675.561	260.198	299.949	268.656
	10074805	22350846	9460810		25641277		154.984	343.831	145.539		394.449
	5522985	44195508	14915582	11166338	14235813		84.962	679.875	229.452	171.776	218.994
	13803070	27878388	11855282	22319638	22173689		212.337	428.863	182.374	343.351	341.106
	5796174	25002187	16977080	17542534	23031996		89.1646	384.617	261.164	269.863	354.309
	6134589	24664630	11246865	15135943	15409478		94.3705	379.425	173.014	232.841	237.049
	5097490	20443446	15396135	12900860	18465449		78.4165	314.489	236.844	198.458	284.06
	5287533	35120740	9561579	5234959	16846320		81.34	540.275	147.089	80.5312	259.153
	5086741	33378170	7417531	6394150	26079278		78.2511	513.468	114.106	98.3634	401.187
	3201650	21306615	10948541	3113878	27249791		49.2521	327.767	168.425	47.9019	419.193
	5403324	17652438	7942221	1663031	20499472		83.1212	271.554	122.178	25.583	315.351
	4901395	80217453	12272098	3069312	14398060			1234.01	188.786	47.2163	221.49
	4394500	77802644	10065907	1666425	15361512		67.6021	1196.87	154.847	25.6352	236.311
	4507118	44251860	16752414	3781414	14948936			680.742	257.708	58.1708	229.965
	6216779	45873975	27770897	6573205	18890099		95.6349	705.695	427.209	101.118	290.593
	3861375	56473166	34860726	2822193	29292613			868.746	536.275	43.4148	450.618
	6378107	39969237	38243955	4208694	12051716		98.1166	614.861	588.32	64.7438	185.396
	3181878	57148321	12199360	3049290	18798816		48.9479	879.133	187.667	46.9083	289.189
	3511345	21887762	11957171	2805746	16764113		54.0162	336.707	183.941	43.1618	257.888
	3651027	29934305	18995508	2307885	19791499		56.165	460.49	292.215	35.503	304.46
	5274418	40275608	13745339	1508198			81.1382	619.574	211.449	23.2011
	3927614	31565577	8504121	3879188	17431844		60.4199	485.584	130.822	59.6749	268.16
	5144275	31699595	9375746	2907593	16665536		79.1362	487.646	144.23	44.7285	256.372
	6669730	42884663	9736760	1631186	7348916		102.603	659.71	149.784	25.0931	113.051
	4474381	43588930	11107995	1756432	9811539		68.831	670.544	170.878	27.0198	150.934
	4490612	46629582	6834539	2249862	10992068		69.0806	717.319	105.138	34.6104	169.095
	4639387	30906677	9838399	9651727	4848987		71.3693	475.448	151.348	148.476	74.5937
	3430452	35455695	9273787	9547876	12984123		52.7718	545.427	142.662	146.878	199.739
	4873031	33314091	22570786	14697581	4190180		74.9635	512.482	347.214	226.098	64.459
	6915474	24250116	8106902	14610816	4058820		106.383	373.048	124.711	224.763	62.4382
	4492784	28031481	9903882	17843066	7546312		69.1141	431.218	152.355	274.486	116.088
	3388982	34130671	6232359	9719854	12319016		52.1339	525.044	95.8745	149.524	189.508
	2563149	29556682	7066900	11670991	15051207		39.4298	454.681	108.713	179.539	231.538
	2228684	28607908	6960888	8202638	3777037		34.2846	440.085	107.082	126.184	58.1035
	3114646	27936985	7902372	9618409	7438948		47.9137	429.764	121.565	147.963	114.436
	3708483	61696385	22927097	13759737	7765371		57.0489	949.097	352.696	211.671	119.457
	3043895	40059415	11993417	12468623	4552472		46.8253	616.248	184.499	191.809	70.0323
	4116374	44965127	20346764	10460351	6119366		63.3236	691.714		160.915	94.1363
	1912894	32234923	15277252	6484126	6977826		29.4267	495.881	235.015	99.7476	107.342
	1977350	22555886	13897154	11143793			30.4183	346.985	213.785	171.429
	8852145	39263782	10857698	16377711			136.176	604.008	167.028	251.944
	11056623	34333371	15546638	9229752			170.088	528.162	239.159	141.984
	7546529	33581152	15425056	12906641			116.091	516.591	237.289	198.547
	8131870	34726313	23262257	20058565			125.095	534.207	357.851	308.568
	8136823	30172700	22444876	12743583			125.172	464.157	345.277	196.039
	5684203	33467432	25465653	10781582			87.4421	514.841	391.747
	9513914	62795093	22700582	9329960			146.356	965.999	349.211
	5373285	28194070	32845201	8507623			82.6591	433.719	505.269
	10243807	32352830	8982933	21115824			157.584	497.695	138.188
	8655857	67293773	16917431	13902122			133.156	1035.2	260.247
	5766896	48627183	20521599	12966621			88.7142	748.049	315.691
	5290180	20993184	9099982	5775798				322.945	139.988
	9057589	23881286	17578930	5086257			139.336	367.374	270.423
	4681453	24364883	8258842	6252166			72.0164	374.813	127.049
	5258585	33317964	14010441	7501998			80.8946	512.542	215.527
	3774611	37700079	21371457	13555906			58.0662	579.953	328.765
	6335667	47546830	29001781				97.4638	731.429	446.144
	3767172	41183790	20427867					633.545	314.249
	11068126	34242667	18427719				170.265	526.767	283.48
	5135079	26826231	12941363				78.9947	412.677	199.081
	6963231	26343900	15378069				107.118	405.257	236.566
	5361237	16235227					82.4738	249.752
	12473649	29088634						447.481
	7517009	12100138					115.637	186.141
	9252801	17273688					142.339	265.727
	6868437	22723813					105.66	349.568
	7274095	25063328					111.9	385.558
	6673584	26518040					102.662	407.936
	10441352
	7040212						108.302
	6675954						102.699
	7308725						112.433
	10238918						157.509
	7157001						110.099
	4701313						72.3219
	5070961						78.0084
	5553489						85.4313
	3790197						58.3059
27.04.2022	4348235	29348357	24161189	4294380	4847141		153.145	1033.65	850.958	151.248	170.717
	3975141	37781541	15178472	6492688	3843229		140.005	1330.67	534.587	228.673	135.359
	3778927	26124691	17109803	5202563	3417922		133.094	920.113	602.608	183.235	120.379
	3352493	8130535	14303162	5291098	3056842		118.075	286.358	503.758	186.353	107.662
	2706382	27177538	11541426	3293260	1241205		95.3189	957.194	406.49	115.989	43.7153
		21867440	18753262	4260856	3223867			770.172	660.491	150.068	113.545
	2673853	24548425	14893265	5790700	1831003		94.1732	864.597	524.542	203.949	64.488
	3245041	22139026	17633321	8933060	2706369		114.291	779.738	621.046	314.623	95.3185
	4310096	16848939	17740567	5003571	4512099		151.802	593.421	624.824	176.226	158.916
	3144453	17866164	16506274	12425927	3781575		110.748	629.247	581.352	437.642	133.187
	4491174	19643578	15478056	11108872	2558933		158.179	691.848	545.138	391.255	90.1258
	4498702	16646519	31067759	9630028	2081615		158.445	586.291	1094.21	339.17	73.3146
	3148904	19635717	24286173	9214973	3592236		110.905	691.571	855.36	324.552	126.519
	2729395	42953458	14138390	7470235	1721368		96.1294	1512.82	497.955	263.102	60.6267
	3720653	36080654	11608368	8689298	2372792		131.042	1270.76	408.847	306.038	83.5699
	4165254	23730983	10768065	6367990	1157653		146.7	835.806	379.252	224.281	40.7726
	2434686	33465274	14570539	4280381	2067878		85.7498	1178.65	513.175	150.755	72.8308
	2449689	21516891	12383194	9103049	1043808		86.2782	757.826	436.137	320.61	36.763
	4106900	20409221	18210114	3907612	3882322		144.645	718.814	641.361	137.626	136.736
	4187091	36373796	11249422	3652830	4247909		147.47	1281.09	396.205	128.653	149.612
	1499444	26188038	24063285	6377047	2811420		52.8105	922.344	847.51	224.6	99.0184
	2852470	36397105	24477970	8673193	2112359		100.464	1281.91	862.115	305.47	74.3974
	1670668	40849728	16034906	2094019	1630647		58.841	1438.73	564.75	73.7515	57.4315
	3876769	29894205	10275651	2828773	1603315		136.54	1052.88	361.909	99.6295	56.4688
	1910828	34947729	12983404	5094014	2217134		67.2995	1230.86	457.276	179.411	78.0876
	3133951	17020337	24697416	8765711	2021307		110.378	599.457	869.844	308.729	71.1905
	2317259	24405867	6351590	5817621	2111833		81.614	859.576	223.703	204.897	74.3789
	2942278	22570601	15053551	4051467	3448575		103.627	794.938	530.187	142.693	121.459
	3632295	29566678	16196979	5274769	4661410		127.93	1041.34	570.458	185.778	164.175
	1982139	24273674	21452212	3872942	3161455		69.811	854.92	755.548	136.405	111.347
	1992147	15063610	37833302	10777086	3626502		70.1635	530.541	1332.49	379.57	127.726
	2821509	10409758	17907299	3094937	3350302		99.3737	366.632	630.696	109.004	117.998
	1356662	37867998	14185853	5098873	5542759		47.7817	1333.71	499.626	179.583	195.216
	1532135	19678637	7885437	4259929	3303083		53.9619	693.083	277.726	150.035	116.335
	2983928	35061594	5782260	5321788	2931950		105.094	1234.87	203.651	187.434	103.263
	1824444	25106596	11433483	8601357	3975937		64.257	884.256	402.688	302.94	140.033
	1998248	14556337	16478771	5614370	2746761		70.3784	512.675	580.383	197.738	96.7411
	1803988	21855862	19430404	11240417	2208232		63.5366	769.765	684.34	395.888	77.774
	2305388	11952574	24054143	9082638	3310294		81.1959	420.97	847.188	319.891	116.589
	2119134	44259550	37116301	10687858	3089233		74.636	1558.82	1307.24	376.427	108.803
	2147854	11712879	14694196	11440602	2687779		75.6475	412.528	517.53	402.939	94.6637
	1538857	35449143	22626890	5312630	2562749		54.1986	1248.52	796.92	187.111	90.2602
	4664542	31911253	12465726	13491484	4485795		164.285	1123.92	439.044	475.171	157.99
	4412999	29074093	12112018	11949355	3572555		155.426	1023.99	426.586	420.857	125.826
	1536626	18056826	19504213	6471510	1965128		54.12	635.962	686.939	227.927	69.2119
	5517724	24658109	29076799	8173228	2022555		194.335	868.46	1024.09	287.862	71.2345
	2556816	17831417	20592884	7880180	2174747		90.0512	628.023	725.282	277.54	76.5947
		37610824	18228719	11380099	2390114			1324.66	642.016	400.808	84.1799
	4047515	14322326	17448731	10296209	5830471		142.554	504.433	614.545	362.633	205.349
	3578392	31707418	18773212	7891731	4165974		126.031	1116.74	661.194	277.947	146.726
	3003791	19095140	13341513	9365032			105.794	672.532	469.889	329.837
	5851369	3360374		15694792	3076704		206.086	118.353		552.771	108.362
	4178052	20970090	14614834	11708304	4069908		147.151	738.568	514.735	412.367	143.342
	1595122	22000296	7620161	14207329	4424229		56.1803	774.852	268.382	500.383	155.822
	4502802	28007556	11976782	8332056	5750968		158.589	986.428	421.823	293.455	202.549
	4071817	14190899	18608865	7278147	4167697		143.41	499.804	655.405	256.337	146.787
	2216316	20194126	13906404	8053349	4401973		78.0588	711.238	489.784	283.639	155.038
	2425993	24629617	9756666	8591808	4955190		85.4436	867.456	343.63	302.604	174.522
	2041077	22622958	24698464	5979551	6033038		71.8868	796.782	869.881	210.6	212.484
	2242584	16325756	15785582	7624513	4385199		78.9839	574.994	555.969	268.536	154.447
	2022013	10765480	12083799	13353831	3650173		71.2154	379.161	425.592	470.323	128.559
	3197388	45515477	14308875	8707477	4470289		112.612	1603.06	503.959	306.678	157.444
	2268036	29480867	22226838	9858817	7284936		79.8803	1038.32	782.83	347.228	256.576
	3206079	23747518	12971877	9316401	3701904		112.918	836.389	456.87	328.124	130.381
	1971878	52302465	15757937	8487155	3218169		69.4496	1842.1	554.995	298.918	113.344
	2254478	38662903	12949654	7297311	5165635		79.4028	1361.71	456.087	257.012	181.934
	1724107	38185568	15218732	5251340	5940674		60.7231	1344.9	536.005	184.952	209.231
	2583386	34515361	14865254	9393132	3011098		90.987	1215.63	523.555	330.827	106.051
	1469965	32538109	12817804	7626922	2635592		51.7722	1145.99	451.444	268.621	92.8257
	2951402	24539723	23476794	7945183			103.949	864.29	826.854	279.83
	1783946	40527731	26998793	5062817			62.8307	1427.39	950.899	178.313
	1254803	48698591	19625559	12176886			44.1942	1715.17	691.213	428.871
	1407334	38999447	36519642	6715197			49.5664	1373.56	1286.22	236.51
	2403750	38159769	11440138	6236489			84.6602	1343.99	402.922	219.649
	1315859	34738954	13771172	11739043			46.3446	1223.51	485.021	413.45
	2140158	46074354	12778050	15483185			75.3765	1622.74	450.044	545.319
		18068909	19190493	7997236				636.388	675.89	281.663
		19277113	20771230	10736660				678.941	731.564	378.146
		22676178	28118286	11183952				798.656	990.327	393.899
		43269588	28077451	9337452				1523.96	988.889	328.866
		36213603	19562320	11971251				1275.44	688.986	421.628
		32392734	14311178	8679353				1140.87	504.04	305.687
		35710411	5944179	5214168				1257.72	209.354	183.643
		30381478	20783646	9994448				1070.04	732.001	352.005
		22626102	6281819	5427101				796.892	221.246	191.143
		18195268	9964813	7513941					350.961	264.641
		26012035	28486087	10855823					1003.28	382.343
		23456823	6696725	6761956					235.859	238.156
		33543031	13622467	11991481					479.784	422.341
		25618475	12243594	5927553					431.22	208.769
			16693675	8104047					587.952	285.425
				7001783						246.603
				5083825						179.053
				6522597						229.726
				5806760						204.514
				8071795						284.289
				9375975						330.222
				6461153						227.562
				3235123						113.941
				5863573						206.515
				4975822						175.249
				7277389						256.31
				5776410						203.445
				3271329						115.216
				9226520						324.959
				11188470						394.058
				6044888						212.901
				5054599						178.023
Average							99.651	750.373	438.505	224.249	165.604
SD							40.2439	360.429	263.876	118.911	93.2331
SEM							3.21182	27.9747	20.6684	9.25723	8.54666
t.test								6.52368e-68	2.41372e-42	2.40513e-29	5.08975e-14

## Sheet: IF XAB2
	NoUV	1h	2h	4h	16h		NoUV	1h	2h	4h	16h
04.02.2022	59484124	62536400	83564232	44698832	29115401		69.8087	73.3908	98.0684	52.4572
	68160744	93286467	94446169	49248398	37229240		79.9913	109.478	110.839	57.7964
	88137877	71221202	89674312	55741358	25599694		103.436	83.583	105.239	65.4163
	69571355	77497102	49120944	79860196	34495872		81.6468	90.9482	57.6468	93.7214
	114347536	83778791	90048934	79748548	19589970		134.195	98.3202	105.679	93.5904
	134993628	45539796	87414991	59199695	34455965		158.424	53.4441	102.587	69.4749
	83099419	101601725	71693266	60979909	13360364		97.5229	119.237	84.137	71.5641
	68301193	58744210	112996170	40277096	13383658		80.1561	68.9404	132.609	47.2679
	60101175	70488438	88610037	57381882	11964290		70.5329	82.723	103.99	67.3416
		93308520	68466727	71180020	5501329			109.504	80.3504	83.5346
	93010038	71819164	64870532	39629297	17032212		109.154	84.2847	76.13	46.5077
	92867165	60961700	54908043	29909437	18261305		108.986	71.5427	64.4384	35.1008
	90566608	116190230	91164393	27074373	10945992		106.286	136.357	106.988	31.7736
	86236519	97485452	102866624	25652794	14251106		101.204	114.406	120.721	30.1053
	78748543	69311288	108666375	83018985	13416216		92.4168	81.3416	127.527	97.4285
	86289559	68208985	85457324	98749119	15549444		101.267	80.0479	100.29	115.889
	153819125	63705614	103952716	94971386	16326765		180.517	74.7629	121.996	111.455
	103639650	94641534	88168340	141240784	13771095		121.628	111.068	103.472	165.756
	103846585	57215894	103664378	121212591	12103258		121.871	67.1468	121.657	142.251
	73049296	32277643	76859294	80902342	9232193		85.7284	37.88	90.1997	94.9445
	74399921	43467737	82952391	70622779	60266645		87.3134	51.0124	97.3503	82.8807
	84241074	69017402	125103231	128489885	7426909		98.8627	80.9967	146.817	150.792
	86460618	72322049	78997178	110664284	10942402		101.467	84.8749	92.7086	129.872
	67496759	54038975	83595805	87963526	7706737		79.2121	63.4185	98.1054	103.231
		54729619	75273820	97473129	11632202			64.229	88.339	114.391
	66185643	80091961	85033949	119868754	13764114		77.6734	93.9934	99.7932	140.674
		56596971	73054294	104491585	9591872			66.4204	85.7342	122.628
	89073514	83888541	56560196	103298770	9082848		104.534	98.449	66.3773	121.228
		63563514	69710244	100046003	6970223			74.5962	81.8098	117.411
	62126696	71651239	53575617	60701640	9158700		72.9099	84.0877	62.8747	71.2375
	115798179	86337432	85083673	107315306	8888308		135.897	101.323	99.8515	125.942
	62419395	71968817	48875451	120539228	12144584		73.2534	84.4604	57.3587	141.461
	99094932	124334855	48564135	96727648	10175570		116.295	145.915	56.9933	113.517
	90577982	78822286	62117363	89739962	9420555		106.299	92.5034	72.899	105.316
	68444767	74885750	52104965	110028707	17271918		80.3246	87.8836	61.1488	129.126
	111389471	104956709	80633689	114103067	10969687		130.723	123.174	94.6292	133.908
	106370028	68501309	96982504	137898890	9507421		124.833	80.391	113.816	161.834
	67685881	55712775	69094223	91345564	12476609		79.434	65.3828	81.0868	107.2
	92972945	72103169	93848735	112185114	17561262		109.11	84.618	110.138	131.657
	139697086	85874681	83012709	107376731	11162264		163.944	100.78	97.4211	126.014
	98029608	86784914	62716381	83775683	21381221		115.044	101.848	73.602	98.3165
	71480226	61454208	62242187	133998262	31293572		83.887	72.1207	73.0455	157.256
	69451087	67965648	134821441	138962299	24369706		81.5056	79.7624	158.222	163.082
	72994005	55698801	87866367	93622623	23722526		85.6635	65.3664	103.117	109.873
	120925042	66298544	52771946	81353578	9212805		141.914	77.8059	61.9315	95.474
	101089018	154387983	49638164	69960153	6643032		118.635	181.185	58.2538	82.103
	124831220	76130953	89262770	105415075	13351474		146.498	89.3449	104.756	123.712
	89463202	62719195	97062888	62965084	8954591		104.991	73.6053	113.91	73.8939
	82803641	61879386	85886756	54194478	6289183		97.1758	72.6197	100.794	63.6009
	76325695	59621283	75091188	86976247	10063454		89.5734	69.9697	88.1247	102.073
	56924714	67999493	137941165	94308028	8660887		66.8051	79.8021		110.677
	55927223	78575651	60852501	101132573	13906517		65.6344	92.2139	71.4146	118.686
	104258156	75017488	69838879	71845219	7090042		122.354	88.0382	81.9607	84.3153
	81762584	103954104	75634115	68611596	9330279		95.954	121.997	88.7618	80.5204
	82319647	92721957	80067346	71676152	7789823		96.6078	108.816	93.9645	84.1169
	76535678	71331340	106542390	91795658	11732638		89.8199	83.7122	125.035	107.729
	63560502	83466695	70371140	59583901	14813071		74.5926	97.9539	82.5854	69.9258
	82709080	115623155	53823455	101574772	28831812		97.0648	135.692	63.1655	119.205
	70898387	36533681	72314054				83.2041	42.8748	84.8655
	68388595	43001704	67777747				80.2587	50.4655	79.5418
	106772656	54650865	85266955				125.305	64.1365	100.067
	74678640	41646858	84097656				87.6405	48.8754	98.6944
	109697409	36843493	69803284				128.737	43.2384	81.919
	81521788	25802747	90763067				95.6714	30.2813	106.517
		41687000	76893176					48.9226	90.2394
	56702545	36200719	87155947				66.5443	42.484	102.283
	106220289	95411791	73896455				124.657	111.972	86.7226
	102047939	93905225	72772986				119.76	110.204	85.4041
	57085874	79506482	99630827				66.9942	93.3063	116.924
	63141044	65150436	79938748				74.1004	76.4585	93.8136
		122466068	53019632					143.722	62.2222
	85270762	81792956	77827975				100.071	95.9897	91.3365
	121232284	119681212	123921721				142.274	140.454	145.431
	128993938	118326995	53508510				151.383	138.865	62.7959
	70982096	81838749	68237590				83.3024	96.0434	80.0815
		95717300	51774346					112.331	60.7608
	73934303	116317907	74756218				86.767	136.507	87.7316
	60626358	85341362					71.1492	100.154
	74210705	74294289					87.0914	87.1895
	59955712	86827440					70.3621	101.898
	62312419	75656665					73.1279	88.7883
		85873184						100.778
	61608909	76631855					72.3023	89.9327
	69333651	76397796					81.3678	89.6581
	69384618	110849615					81.4276	130.09
	95240502	82012625					111.771	96.2475
	105032265	82960670					123.263	97.36
	92384096	67824681					108.419	79.5969
	75104878	60434764					88.1407	70.9243
	71500464	72516262					83.9107	85.1028
	69723241	71581540					81.825	84.0059
	71556759	56714087					83.9768	66.5579
	122674637	80016751					143.967	93.9052
	123224563	61342941					144.612	71.9902
	67274557	91372720					78.9513	107.232
	65683468	64905181					77.0841	76.1707
		65253682						76.5797
27.04.2022	17075981	33060646	32375076	22169832	21994061		89.4458	173.175		116.128	115.207
	17010856	33673948	28591120	26233361	14842229		89.1047	176.388	149.763	137.413	77.7452
	15107547	24203879	22458843	18543403	18986430		79.135	126.783	117.642	97.1324	99.453
	18479426	23403576	26506441	15533613	23699299		96.7972	122.59	138.844	81.3667	124.139
	19708400	35005666	27319736	21938413	14520480		103.235	183.363	143.104	114.916	76.0598
	19051957	23103944	25362876	27375397	18050905		99.7962	121.021	132.853	143.395	94.5526
	20391406	25841068	20751227	22890947	11441821		106.812	135.358	108.697	119.905	59.9335
	16723334	23519151	27501698	18380085	11982122		87.5986	123.196	144.057	96.2769	62.7637
	17240194	23552350	34616434	14956896	19199432		90.306	123.37		78.3458	100.569
	21493941	28626174	19497775	17886627	17419489		112.588	149.947	102.131	93.6921	91.2452
	19232886	17238743	27721832	14177168	31694483		100.744	90.2984	145.21	74.2615	166.019
	17708259	17390746	16406805	26886969	18380162		92.7578	91.0946	85.9406	140.837	96.2773
	31166874	14295131	29176526	15816973	28665119		163.255	74.8794	152.83	82.851	150.151
	20842092	26774513	21260565	26149612	19901668		109.173	140.248	111.365	136.975	104.247
	18182467	14485693	17055678	31384311	16111663		95.2417	75.8776	89.3395	164.394	84.3946
	18743052	27290901	23344537	20793569	22638731		98.1781	142.953	122.281	108.919	118.584
	21502425	31861444	21898952	26274329	22345032		112.632	166.894	114.709	137.628	117.046
	13746405	24686387	14864791	29682991	20013445		72.0052	129.31	77.8634	155.483	104.833
	14029711	36143515	22740352	25148597	21804441		73.4891	189.324	119.116	131.731	114.214
	20541740	37900481	22247332	18317503	15345424		107.6	198.527	116.534	95.9491	80.381
	16598959	27278854	30124347	21633876	14323256		86.9471	142.89	157.795	113.321	75.0268
	19297500	23423803	32400413	20741028	35813035		101.082	122.696		108.644	187.593
	15245591	18739922	15047160	13351767	42542190		79.8581	98.1617	78.8187	69.938	222.841
		16999535	18571457	29291791	17516043			89.0454	97.2793	153.434	91.7509
	17978579	17874081	17440561	25832251	28251952		94.1737	93.6264	91.3555	135.312	147.987
	15244556	18453291	20248007	17199382	37266789		79.8526	96.6603	106.061	90.0922	195.207
		20969489	26125995	18995615	31045458			109.84	136.851	99.5011	162.619
	21489624	37903985	9386173	19201990	11946054		112.565	198.545	49.1658	100.582	62.5747
	18634856	33831203	20371010	17631185	8891268		97.6114	177.212	106.706	92.3541	46.5734
	14469212	15847367	14960581	13315912	21782211		75.7913	83.0102	78.3651	69.7502	114.098
		37135937	27940716	17308103	19069532			194.522	146.357	90.6617	99.8883
	19659260	21430190		14558029	32590629		102.977	112.254		76.2565	170.713
	17062617	19621654	37078204	27179165	39626214		89.3758	102.78		142.367	207.566
	14810760	17163220	30036226	26183163	9789990		77.5804	89.9028	157.333	137.15	51.281
	13901703	12500134	32538860	25274651	19817006		72.8186	65.4771		132.391	103.804
	23117377	15738351	24422267	31462112	27314163		121.091	82.4392	127.926	164.802	143.075
	14779429	24389304	26622086	18974296	31548375		77.4163	127.754	139.449	99.3894	165.254
	10989473	26099043	28933083	34999864	10328244		57.5641	136.71	151.555	183.333	54.1005
	24057418	36799659	19400819	13549422	10154196		126.015	192.761	101.624	70.9733	53.1888
	14747900	24006934	41502569	15177846	14668572		77.2511	125.751		79.5032	76.8356
	21189399	34719913	35353157	11246303	12096686		110.992	181.867		58.9094	63.3638
	18036758	28312802	31176860	17143874	13912507		94.4785	148.306	163.308	89.8015	72.8752
	19709370	17668520	29892493	18140050	14426109		103.24	92.5496	156.58	95.0195	75.5655
	15646767	20369229	38836560	30406480	15892885		81.9595	106.696		159.272	83.2487
	23108907	20792223	23923267	19181568	12861739		121.047	108.912	125.313	100.475	67.3712
	23894911	17158814	41487791	18585488	9970055		125.164	89.8797		97.3528	52.2242
	26029965	15448427	18991646	18911584	18414562		136.348	80.9205	99.4803	99.0609	96.4575
	15980513	14123177	21549782	18778103	11298423		83.7077	73.9787	112.88	98.3617	59.1824
	27248938	13199283	18283181	17892317	24409654		142.733	69.1393	95.7693	93.7219	127.86
	15711742	15609208	18110057	15595576	18921556		82.2998	81.7627	94.8624	81.6913	99.1132
	18993644	27229579	24743107	16107343	11903712		99.4908	142.631	129.607	84.372	62.3529
	15163482	24150080	44933982	19556882	21225314		79.428	126.501		102.441	111.18
	20350385	32259501	44734635	22926685	11759749		106.598	168.979		120.092	61.5988
	19995112	17000983	24653831	20837676	11295799		104.737	89.053	129.139	109.15	59.1686
	18742196	18259358	22980244	16253447	13232377		98.1737	95.6445	120.373	85.1373	69.3126
	15951518	21759578	30301755	14581423	8554858		83.5558	113.979	158.724	76.3791	44.8113
	27627031	22340979		16035398	29135175		144.713	117.024		83.9952	152.613
	14907537	21420719	25758234	15394340	19773703		78.0873	112.204	134.924	80.6372	103.577
	21021638	26823361	16898010	8499886	34623966		110.114	140.504	88.5136	44.5233	181.364
	20257261	15195822	18669355	13546800	29876408		106.11	79.5974	97.7921	70.9596	156.496
	13910527	18149168	32269180	14430807	11031037		72.8648	95.0673		75.5901	57.7818
	18103533	24496645	20516205	17720273	14494502		94.8283	128.316	107.466	92.8207	75.9238
	23748164	24653062	13715635	13413881	11703605		124.395	129.135	71.844	70.2634	61.3048
	14980719	20760705	24382401	14888246	11771273		78.4706	108.747	127.718	77.9862	61.6592
	17406259	22702457	12011089	21670877	28144343		91.1759	118.918	62.9154	113.514	147.423
	15983455	19017741	23590049	16664907	11417661		83.7231	99.617	123.567	87.2926	59.8069
	13295255	18559905	17376054	11311983	7838443		69.642	97.2188	91.0177	59.2534	41.0586
	25971960	21506110	34096945	13662858	18748848		136.044	112.651		71.5675	98.2085
		20702647	22239916	9698335	43657352			108.443	116.495	50.8009	228.682
		18153471	28720306	11490359	13301903			95.0898	150.44	60.1877	69.6768
	22453367	16693370	28881634	19156313	16828651		117.613	87.4417	151.285	100.343	88.1503
	21915316	21936986	21630233	17605122	11163900		114.795	114.908	113.302	92.2175	58.4777
	16784863	19633210	26347191	18976177	10524574		87.9209	102.841	138.009	99.3993	55.1289
	21146258	18578257	28285766	17561730	28397252		110.766	97.3149	148.164	91.9902	148.748
	22923730	14575333	22152273	16553584	10817634		120.077	76.3472	116.036	86.7095	56.6639
	23486298	19064323	23060048	13175902	17255589		123.024	99.861	120.791	69.0168	90.3866
	18731796	16438074	43996928	24827290	36852109		98.1192	86.1044		130.048	193.035
	20041667	16215647	19659472	23467685	15938381		104.98	84.9393	102.978	122.926	83.487
	18691051	16168815	25785807	22069574	12463241		97.9058	84.694	135.069	115.603	65.2838
	15547540	19867780	32836336	14742879	19693754		81.4397	104.07		77.2248	103.158
	16210983	16567291	23324544	13657734	12987826		84.9149	86.7813	122.176	71.5407	68.0316
	16183434	19526814	21011389	24304834	15404673		84.7706	102.284	110.06	127.311	80.6913
	17039278	16278692	21483682	19953823	12157709		89.2536	85.2696	112.534	104.52	63.6834
	18203515	17647112	19550561	18816876	13490161		95.352	92.4375	102.408	98.5648	70.6629
	18464446	15644702	15306441	12443767	30019884		96.7188	81.9486	80.1768	65.1818	157.247
	16482298		16977948	21381919	13579082		86.3361		88.9323	112.001	71.1287
	31038357		19064077	16721078	19622703		162.582		99.8597	87.5868	102.786
	23571550		19563319	20492776	22164340		123.47		102.475	107.343	116.099
	25490962		23853632	17912544	20609263		133.524		124.948	93.8278	107.954
	29167535		19623297	16420937			152.783		102.789	86.0146
	18381663		22335459	14401578			96.2851		116.996	75.437
	22171333		22644470	13295635			116.136		118.614	69.644
	18414347		32352372	13963808			96.4563			73.1439
	17770753		21356464	10951732			93.0851		111.867	57.3664
	17400403		14648948	13893657			91.1452		76.7328	72.7765
			22976616	10782882					120.354	56.4819
	17223806		15268873	9616605			90.2202		79.98	50.3728
	18391945		19335220	12424255			96.339		101.28	65.0796
			15546177	9927844					81.4326	52.0031
			17432545	17588883					91.3136	92.1325
				10457453						54.7773
				14721607						77.1134
				13782690						72.1952
				14921193						78.1588
Average							100	101.469	104.228	97.7919	100.583
SD							23.136	33.0693	26.1614	30.6003	44.3393
SEM							1.72446	2.45126	2.08129	2.40418	4.69996
t.test								0.625103	0.115783	0.449508	0.887417

## Sheet: IF 64PP
	NoUV	1h	2h	4h	16h		NoUV	1h	2h	4h	16h
04.02.2022	8392420	52131270	46696584	28428268	47185766		88.1898	547.809	490.7	298.732
	6905247	71716856	59084059	26156851	44239269		72.5622	753.62	620.871	274.863
	8864206	54228357	58758439	25865496	32448979		93.1474	569.846	617.449	271.801	340.982
	9886182	48760447	36109684	30405527	50582751		103.887	512.388	379.45	319.509
	13447992	54284284	55124641	54574002	23917206		141.315	570.434	579.264	573.478	251.328
	20167690	41617947	43897972	34891331	44797903		211.927	437.332	461.291	366.647
	10058709	67786111	42703219	33489499	37665493		105.7	712.314	448.737	351.916	395.799
	7577917	41054733	63884475	22533560	54765932		79.6308	431.414	671.315	236.789
	6179397	49795284	43805599	38110556	34807001		64.9347	523.262	460.321	400.476	365.761
	5000021	66680104	31235992	39775231	28991254		52.5415	700.692	328.236	417.969	304.648
	9853001	55357174	39822897	22915824	57228630		103.538	581.708	418.47	240.806
	10077953	44494260	36194690	20608069	68705193		105.902	467.557	380.343	216.555
	9903976	103552940	30251485	16282181	39329510		104.074	1088.16	317.891	171.097
	10094184	86635411	76399064	16783390	27351654		106.072	910.388	802.822	176.364	287.418
	8324372	51118147	71561032	24263378	40873267		87.4747	537.163	751.982	254.966
	8146644	50840416	46024125	33209420	36570034		85.6071	534.245	483.634	348.973	384.288
	17653826	64204781	55492957	25759331	30889384		185.511	674.681	583.135	270.686	324.594
	12615117	66546038	46227929	48096684	31788602		132.563	699.283	485.775	505.413	334.043
	13088266	42401245	71255452	50154112	26491641		137.535	445.563	748.771	527.033	278.381
	8637751	29292891	30099329	26661735	38708373		90.7678	307.817	316.292	280.169
	8632625	36568970	38585137	20589493	14811661		90.7139	384.276	405.463	216.36	155.645
	9948449	47111453	81797893	58869034	33735791		104.541	495.06	859.554	618.611	354.505
	10988226	47343200	53262475	30954896	34276175		115.467	497.495	559.696	325.282	360.183
	8654944	48318307	45762171	16110669	28743925		90.9484	507.742	480.881	169.295	302.049
	3804229	47869500	27947774	22674674	48932423		39.9758	503.025	293.683	238.271
	7778758	51986101	32819156	41484876	75236957		81.7412	546.284	344.872	435.934
	5083001	51442139	25686414	29739737	37944398		53.4135	540.568	269.92	312.513	398.73
	11546173	68570444	30777063	24118259	41232035		121.33	720.556	323.413	253.441
	6502672	44716806	31994988	52102217	40342812		68.3318	469.896	336.212	547.504
	7881888	49768122	37602145	17390136	55793824		82.825	522.977	395.133	182.74
	13686103	58053391	51373247	43707750	30010771		143.817	610.04	539.844	459.293	315.361
	8362533	52515424	22959792	34511523	48396090		87.8757	551.846	241.268	362.656
	11228371	88030870	26468979	24437988	39761709		117.991	925.052	278.143	256.801	417.827
	10500002	51035698	36174671	26750747	55814699		110.337	536.297	380.133	281.104
	7828293	75638471	42791037	27152958	61807627		82.2618	794.829	449.66	285.33
	14704490	65075381	52279816	28822753	50952432		154.519	683.829	549.37	302.877
	12176535	53631680	55104761	42044115	56190593		127.954	563.576	579.055	441.811
	8317184	50542116	36414001	24332296	21384377		87.3992	531.11	382.648	255.69	224.713
	10658949	65758601	74077964	36442107	30682136		112.007	691.009	778.431	382.943	322.416
	14736549	71952041	48511216	24043203	22060841		154.856	756.091	509.769	252.652	231.821
	10598618	74438548	41868667	16188950	26963766		111.373	782.22	439.967	170.118	283.342
	7329980	52080672	43164869	39666255	39053224		77.0254	547.277	453.588	416.823
	8623306	53641316	65642669	35065676	39720438		90.616	563.677	689.79	368.479
	8611922	38233910	48861565	20283811	27136605		90.4963	401.772	513.45	213.148	285.159
	13317152	58105514	36214250	14991439	18660917		139.94	610.588	380.549	157.534	196.094
	10821027	102916470	33426505	12519756	16287407		113.71	1081.47	351.255	131.561	171.152
	12936593	52418778	59189998	22411670	28466501		135.941	550.83	621.984	235.508	299.134
	10094398	54563488	48103775	17306263	18218495		106.075	573.368	505.487	181.859	191.445
	9335533	41457665	42943939	12409874	14673697		98.1002	435.648	451.266	130.406	154.195
	8613316	52652776	33505880	13841870	22596145		90.511	553.289	352.089	145.454	237.446
	6360497	55129979	59794279	17273399	26802135		66.8378	579.32		181.513	281.644
	5626816	72656274	38902761	21312737	37422392		59.1281	763.491	408.8	223.96	393.244
	12467200	65611463	34393207	14411110	17825133		131.009	689.463	361.413	151.436	187.311
	10587387	58161851	39269131	11820843	21464016		111.255	611.18	412.65	124.217	225.55
	9571586	80507361	65793418	14534248	31212241		100.581	845.993	691.375	152.73	327.986
	10492052	51297827	53505674	21944777	32099182		110.253	539.051	562.252	230.602	337.307
	8779637	47834492	37020352	12202869	37498167		92.2587	502.657	389.02	128.231	394.041
	9762978	65750357	37198841	25875461	52175628		102.592	690.922	390.895	271.906
	9142729	37301038	11354670				96.0742	391.969	119.318
	10013470	36242925	11616873				105.224	380.85	122.073
	19189294	36743080	52321401				201.646	386.106	549.807
	11991095	29487596	47565028				126.006	309.863	499.826
	10176253	34458285	43248244				106.935	362.097	454.464
	8281388	35878962	55542714				87.023	377.026	583.657
	3775418	30829671	36455770				39.6731	323.966	383.087
	8740415	29154622	36609340				91.8466	306.364	384.701
	13458611	69812128	49455490				141.427	733.604	519.691
	13312375	66985921	47878402				139.89	703.906	503.119
	6162962	51320314	37476334				64.762	539.287	393.811
	6107456	42472367	47070525				64.1788	446.311	494.629
	5697287	80564691	32939872				59.8686	846.595	346.141
	9112913	65961782	35630268				95.7609	693.144	374.412
	11551837	84353732	69418307				121.39	886.411	729.466
	16415141	82636113	30899542				172.495	868.362	324.701
	9121842	68034208	51077588				95.8547	714.921	536.737
	5715307	72573703	22343924				60.058	762.624	234.796
	7554338	87299635	37860531				79.383	917.368	397.848
	6247015	58810800					65.6453	617.999
	6543507	47705694					68.7609	501.304
	7131756	60755425					74.9424	638.434
	7442431	48885270					78.207	513.699
	4911662	65105196					51.613	684.143
	5187373	56010470					54.5103	588.573
	5810554	56268758					61.0588	591.287
	6951575	73416379					73.049	771.479
	10692406	55812520					112.359	586.493
	9936032	65306948					104.41	686.263
	10856661	47613689					114.085	500.337
	7199784	41651191					75.6572	437.682
	6745098	49626077					70.8793	521.484
	7016825	58021155					73.7346	609.702
	6779872	39162872					71.2447	411.534
	14370250	45450247					151.006	477.603
	19364357	42724883					203.486	448.964
	5975237	71025770					62.7894	746.358
	7059335	40802518					74.1814	428.764
		49826732						523.592
27.04.2022	4378166	40382733	40367151	12054764	8639695		88.4503	815.836	815.521	243.537	174.544
	3713231	32195653	30768671	16153253	10723773		75.0169	650.435	621.607	326.337	216.648
	3406182	27638658	26494590	11778782	6519240		68.8137	558.372	535.259	237.962	131.705
	3741796	31680993	23471472	11121019	7667060		75.5939	640.038	474.184	224.673	154.894
	4221715	62383967	28919440	12951708	4857773		85.2896	1260.32	584.247	261.658	98.1396
	5493022	53080105	21592306	14880361	4855868		110.973	1072.36	436.22	300.622	98.1011
	4300316	34155516	31104191	26904264	3479679		86.8775	690.03	628.385	543.536	70.2985
	3192922	22449820	22393901	22130769	3459275		64.5053	453.544	452.415	447.099	69.8863
	4063605	19279906	51247586	18448543	6608164		82.0953	389.504		372.708	133.502
	5533820	34514416	30360376	12138641	6173973		111.797	697.28	613.358	245.232	124.73
	5580500	21672823	22438655	10137696	9498818		112.741	437.847	453.319	204.808	191.901
	7844159	21179228	29370551	13773870	6245830		158.472	427.875	593.361	278.268	126.182
	8217103	38639332	51034870	7987963	8911229		166.007	780.614	1031.04	161.377	180.03
	7806127	30942589	19607037	16099703	6544939		157.704	625.12	396.113	325.256	132.225
	4302199	41448146	15756423	23159242	4350785		86.9155	837.36	318.32	467.877	87.8971
	4576696	34821922	25418092	10933700	6250467		92.4611	703.493	513.511	220.889	126.276
	5366509	51727007	35859261	25023977	6741458		108.417	1045.02	724.45	505.549	136.195
	3200367	55817680	17171007	14926756	6076595		64.6557	1127.66	346.899	301.559	122.763
	3913408	39500288	28835263	19939105	5117035		79.061	798.008	582.547	402.821	103.377
	5432397	36891598	23542912	18870554	24068034		109.748	745.306	475.628	381.234
	3927132	27280797	34490767	14997220	10412746		79.3382	551.143	696.803	302.983	210.364
	4629629	25376315	44020016	17634116	11025584		93.5305	512.667	889.318	356.255	222.745
	2883453	22654041	23444429	16333312	13486358		58.2532	457.67	473.638	329.975	272.459
	3485269	16838568	24270532	22444067	11936260		70.4114	340.183	490.327	453.428	241.143
	4984624	16030838	20411859	19862082	10792469		100.702	323.864	412.372	401.265	218.036
	3698661	18948509	23049922	18347392	16761394		74.7225	382.809	465.668	370.665	338.623
	2625116	30829807	28580062	21467969	10640877		53.0341	622.842	577.391	433.708	214.973
	6797473	45740369	16363094	10221305	9768131		137.327	924.074	330.577	206.497	197.341
	6944525	49580239	13537110	10437372	3068250		140.297	1001.65	273.485	210.862	61.9866
	3168690	22321616	13815326	9934078	7703727		64.0157	450.954	279.105	200.694	155.635
	2349149	46533680	26327930	8641849	6416290		47.4589	940.101	531.892	174.588	129.626
	4609539	32078804	48208922	6479155	12425548		93.1246	648.075	973.945	130.896	251.028
	3934370	23676264	50671292	22442631	13381945		79.4844	478.322	1023.69	453.399	270.35
	2691215	23592495	37255530	16818127	10066883		54.3695	476.629	752.658	339.77	203.377
	2427624	17891908	45387503	17939744	5706847		49.0443	361.463	916.945	362.429	115.293
	4053005	21246612	26853401	27872674	7271530		81.8812	429.236	542.508	563.1	146.904
	2088840	26875621	29084632	13794340	14923938		42.2	542.957	587.585	278.681	301.502
	1156363	39932124	25693280		4947723		23.3615	806.732	519.071		99.9568
	6953305	50562478	23691446	13757974	5133891		140.475	1021.49	478.628	277.947	103.718
	3940119	28373430	52465174	10003274	6280206		79.6006	573.217	1059.93	202.092	126.876
	5044691	56452636	55756832	9879597	5789911		101.916	1140.49	1126.43	199.593	116.971
	6111787	30346552	31395307	17291016	4304197		123.474	613.079	634.266	349.323	86.9559
	5014660	21425691	48353870	11882448	5463080		101.309	432.854	976.873	240.056	110.368
	5458122	20960030	49120201		10320104		110.268	423.447	992.355		208.493
	4987355	24500095	23373931	15109153	4506202		100.757	494.965	472.214	305.244	91.0369
	5074556	23852348	49353843	9101899	4134061		102.519	481.879	997.075	183.882	83.5187
	7733028	17724676	18727652	13312901	12746223		156.227	358.084	378.347	268.955	257.507
	4575221	14684976	19025080	15510237	5368008		92.4313	296.674	384.356	313.347	108.448
	7258427	12549090	20262041	13915607	8413204		146.639	253.524	409.346	281.131	169.968
	5038717	16038439	16416732	11715614	6342750		101.795	324.018	331.66	236.686	128.14
	5731700	31336759	21436886	11878219	4473369		115.795	633.084	433.08	239.971	90.3736
	6561188	33408705	36261231	14513412	10959578		132.553	674.942	732.571	293.208	221.412
	4968187	51327724	39925383	15200451	3604763		100.37	1036.95	806.596	307.088	72.8255
	5560106	26800291	23494312	12629455	8775292		112.329	541.435	474.646	255.148	177.284
	5351066	35874329	25176368	12374704	10156404		108.105	724.754	508.628	250.001	205.186
	4607866	31115141	36255538	12967648	2997754		93.0908	628.606	732.456	261.98	60.5624
	9026776	32975985	40360156	11811726	12927623		182.364	666.2	815.379	238.627	261.171
	4187367	33418408	29109726	8886928	5303016		84.5956	675.138	588.092	179.539	107.135
	6119618	42284205	19661757	6927986	17372317		123.632	854.25	397.218	139.963	350.966
	6646486	18577377	16021962	19764961	19103036		134.276	375.311	323.685	399.303	385.931
	4506118	27738400	28249537	14150134	5492610		91.0352	560.387	570.714	285.869	110.965
	3892926	37531320	19003730	8976119	4933407		78.6472	758.23	383.924	181.341	99.6676
	6213913	37245503	19086490	11718837	3973290		125.537	752.455	385.596	236.751	80.2707
	3538632	32438426	21441289	8788260	4103436		71.4895	655.34	433.169	177.546	82.9
	5050584	34383229	16697330	9793266	9106206		102.035	694.63	337.329	197.849	183.969
	3483035	31033160	27931273	8093288	3503036		70.3663	626.95	564.284	163.505	70.7704
	3151438	26635079	20018509	5958406	2577867		63.6672	538.097	404.426	120.375	52.0796
	6118793	31367068	38897394	7246579	10146579		123.615	633.696	785.828	146.4	204.987
	2737804	31811771	26087375	6610766	19085974		55.3107	642.68	527.032	133.555	385.586
	2396956	30075675	29496514	6716205	5670943		48.4247	607.606	595.906	135.685	114.568
	6209468	32322507	30097162	13522879	4563141		125.447	652.998	608.04	273.197	92.1872
	6181697	30979528	24612936	10667195	11200466		124.886	625.867	497.245	215.505	226.278
	3815836	35220312	27783897	12291019	5350842		77.0897	711.541	561.307	248.31	108.101
	4668210	35651471	46178832	14540534	10260654		94.3099	720.252	932.932	293.756	207.292
	5446242	26046494	16545880	13424163	7908247		110.028	526.206	334.27	271.203	159.767
	7282192	27663297	16737769	11498279	21476331		147.119	558.87	338.146	232.295
	4664897	23738330	36821391	14082229	12018937		94.243	479.576	743.887	284.497	242.814
	5953065	22801792	19813842	14359591	14330583		120.267	460.655	400.291	290.101	289.515
	5034645	27946517	28750505	14351728	15229835		101.713	564.592	580.834	289.942	307.682
	3672298	28452167	23485506	12715876	7463695		74.1899	574.807	474.468	256.894	150.786
	3483729	27266123	24453322	10149525	14477952		70.3803	550.846	494.02	205.047	292.492
	3352533	27239516	19616599	21750232	4242617		67.7298	550.309	396.306	439.411	85.7118
	4643147	21250340	19145809	17514669	11875760		93.8036	429.312	386.795	353.842	239.921
	5894957	30514333	25962282	13746509	12402594		119.093	616.468	524.505	277.715	250.564
	6664232	19795471	16488614	16735626	19348243		134.635	399.92	333.113	338.103	390.885
	5771146		16885009	15695192	9280578		116.592		341.121	317.083	187.492
	9750260		23517207	13989212	6908926		196.98		475.108	282.618	139.578
	6605309		15661266	13468883	6032699		133.444		316.398	272.106	121.876
	9221363		25782479	13843515	5365881		186.295		520.873	279.675	108.405
	10300735		23529392	10391397			208.101		475.355	209.933
	5304186		23549605	13954417			107.158		475.763	281.915
	5459321		22394287	11083398			110.292		452.422	223.913
	3571512		49178621	10194808			72.1538		993.535	205.961
	4985975		18647046	9423878			100.73		376.719	190.387
	3826844		17819905	11410149			77.3121		360.008	230.514
	2913477		15820750	9271658			58.8598		319.62	187.311
	4842874		15216790	10872666			97.8386		307.418	219.656
	3786846		23529250	10534870			76.5041		475.352	212.832
			10244199	6817412					206.959	137.729
			15638948	10381915					315.947	209.742
				8979708						181.413
				10690163						215.969
				12546795						253.478
				6967147						140.754
Average							100	607.253	512.15	277.799	204.575
SD							34.5473	186.031	190.776	103.327	98.3991
SEM							2.48035	13.7895	14.4213	8.16872	8.90863
t.test								4.27368e-128	4.06177e-99	4.27953e-70	3.12325e-33
