# Supplementary material for: XAB2 dynamics during DNA damage-dependent transcription inhibition
Source: eLife. 2022 Jul 26;11:e77094. doi: 10.7554/eLife.77094 (PMC9436415; doi:10.7554/eLife.77094)
Supplement: Figure 3—figure supplement 1—source data 1. [file elife-77094-fig3-figsupp1-data1.xlsx]

## Sheet: data
	siMock								siAQR								siPRP19								siCCDC16								siPPIE								siISY1								siXPF
Paste	Area	Mean	Mix	Max	IntDen	RawIntDen		Paste	Area	Mean	Mix	Max	IntDen	RawIntDen		Paste	Area	Mean	Mix	Max	IntDen	RawIntDen		Paste	Area	Mean	Mix	Max	IntDen	RawIntDen		Paste	Area	Mean	Mix	Max	IntDen	RawIntDen		Paste	Area	Mean	Mix	Max	IntDen	RawIntDen		Paste	Area
2	3.183	284.689	5	708	906.283	189318		1	3.183	192.516	0	480	612.858	128023		1	3.183	342.162	73	643	1089.25	227538		1	3.183	282.036	12	626	897.838	187554		1	3.183	131.547	0	334	418.77	87479		1	3.183	304.167	99	616	968.29	202271		1	3.183
3	3.183	212.714	17	579	677.158	141455		2	3.183	145.863	0	392	464.343	96999		2	3.183	258.415	19	671	822.643	171846		2	3.183	88.749	0	336	282.525	59018		2	3.183	209.836	34	506	667.996	139541		2	3.183	269.874	50	604	859.12	179466		2	3.183
4	3.183	168.015	0	458	534.862	111730		3	3.183	347.041	43	834	1104.78	230782		3	3.183	106.501	0	353	339.036	70823		3	3.183	143.319	0	495	456.243	95307		3	3.183	146.123	25	350	465.171	97172		3	3.183	138.34	6	327	440.393	91996		3	3.183
7	3.183	62.95	0	288	200.397	41862		4	3.183	178.253	0	559	567.452	118538		4	3.183	165.696	0	458	527.48	110188		4	3.183	271.504	22	675	864.31	180550		4	3.183	128.189	0	417	408.081	85246		4	3.183	330.471	132	633	1052.03	219763		4	3.183
8	3.183	52.168	0	333	166.074	34692		5	3.183	231.669	0	728	737.5	154060		5	3.183	318.762	43	738	1014.75	211977		5	3.183	252.609	13	600	804.16	167985		5	3.183	76.414	0	242	243.256	50815		5	3.183	174.365	0	389	555.078	115953		5	3.183
10	3.183	269.472	0	617	857.842	179199		6	3.183	195.605	0	476	622.691	130077		6	3.183	259.325	15	828	825.539	172451		6	3.183	178.417	0	515	567.974	118647		6	3.183	62.319	0	234	198.387	41442		6	3.183	183.547	29	472	584.308	122059		6	3.183
11	3.183	186.956	0	527	595.16	124326		7	3.183	366.398	29	886	1166.4	243655		7	3.183	135.317	0	472	430.771	89986		7	3.183	358.848	80	782	1142.36	238634		7	3.183	147.104	0	333	468.293	97824		7	3.183	100.755	0	302	320.745	67002		7	3.183
13	3.183	171.329	0	610	545.413	113934		8	3.183	344.445	0	665	1096.51	229056		8	3.183	174.158	0	505	554.417	115815		8	3.183	128.05	0	320	407.635	85153		8	3.183	110.681	0	283	352.344	73603		8	3.183	210.653	48	479	670.595	140084		8	3.183
14	3.183	124.337	0	393	395.816	82684		9	3.183	201.253	0	601	640.671	133833		9	3.183	275.896	0	615	878.293	183471		9	3.183	217.054	25	479	690.974	144341		9	3.183	259.113	72	521	824.864	172310		9	3.183	206.98	36	465	658.905	137642		9	3.183
16	3.183	178.848	0	541	569.348	118934		10	3.183	263.185	37	592	837.827	175018		10	3.183	345.251	33	787	1099.08	229592		10	3.183	154.743	1	394	492.611	102904		10	3.183	232.066	49	486	738.763	154324		10	3.183	185.812	24	528	591.517	123565		10	3.183
18	3.183	169.376	0	480	539.194	112635		11	3.183	209.141	0	631	665.784	139079		11	3.183	262.427	13	722	835.415	174514		11	3.183	113.244	0	297	360.502	75307		11	3.183	217.367	16	515	691.969	144549		11	3.183	194.624	28	479	619.569	129425		11	3.183
20	3.183	499.752	50	1177	1590.92	332335		12	3.183	218.998	0	571	697.163	145634		12	3.183	437.711	53	937	1393.42	291078		12	3.183	355.953	126	648	1133.15	236709		12	3.183	187.208	27	386	595.96	124493		12	3.183	160.495	12	497	510.922	106729		12	3.183
22	3.183	159.722	0	502	508.461	106215		13	3.183	105.047	0	367	334.407	69856		13	3.183	144.427	0	469	459.772	96044		13	3.183	258.218	51	519	822.016	171715		13	3.183	76.507	0	285	243.553	50877		13	3.183	249.45	63	502	794.102	165884		13	3.183
24	3.183	189.427	0	606	603.025	125969		14	3.183	65.777	0	344	209.397	43742		14	3.183	412.388	97	777	1312.8	274238		14	3.183	336.162	105	614	1070.14	223548		14	3.183	103.847	0	1095	330.587	69058		14	3.183	280.838	79	697	894.023	186757		14	3.183
26	3.183	225.008	0	646	716.293	149630		15	3.183	222.421	11	523	708.059	147910		15	3.183	189.887	0	490	604.49	126275										15	3.183	220.474	46	504	701.86	146615										15	3.183
28	3.183	103.803	0	342	330.448	69029										16	3.183	209.573	0	566	667.158	139366										16	3.183	235.111	44	491	748.457	156349										16	3.183
30	3.183	297.714	26	643	947.749	197980										17	3.183	302.197	0	652	962.019	200961																										17	3.183
32	3.183	241.782	30	779	769.693	160785
33	3.183	184.438	0	549	587.142	122651
	Mean	199.079	100						Mean	219.174	110.094						Mean	255.3	128.24						Mean	224.208	112.622						Mean	158.994	79.8649						Mean	213.598	107.293						Mean
	SD	98.5751	49.5156						SD	84.9849	42.689						SD	96.8655	48.6568						SD	91.5623	45.993						SD	64.3322	32.3149						SD	65.445	32.8739						SD
	SEM	22.6147	11.3597						SEM	21.943	11.0223						SEM	23.4933	11.801						SEM	24.4711	12.2921						SEM	16.0831	8.07873						SEM	17.4909	8.78592						SEM
[truncated: 5 more columns]

## Sheet: p-value
	siMock	siAQR	siPRP19	siCCDC16	siPPIE	siISY1	siXPF
	284.689	192.516	342.162	282.036	131.547	304.167	15.916
	212.714	145.863	258.415	88.749	209.836	269.874	23.233
	168.015	347.041	106.501	143.319	146.123	138.34	33.101
	62.95	178.253	165.696	271.504	128.189	330.471	47.526
	52.168	231.669	318.762	252.609	76.414	174.365	25.591
	269.472	195.605	259.325	178.417	62.319	183.547	61.206
	186.956	366.398	135.317	358.848	147.104	100.755	44.976
	171.329	344.445	174.158	128.05	110.681	210.653	18.678
	124.337	201.253	275.896	217.054	259.113	206.98	24.265
	178.848	263.185	345.251	154.743	232.066	185.812	23.943
	169.376	209.141	262.427	113.244	217.367	194.624	39.535
	499.752	218.998	437.711	355.953	187.208	160.495	27.072
	159.722	105.047	144.427	258.218	76.507	249.45	27.838
	189.427	65.777	412.388	336.162	103.847	280.838	29.158
	225.008	222.421	189.887		220.474		28.899
	103.803		209.573		235.111		14.896
	297.714		302.197				11.786
	241.782
	184.438
Variance	9205.63	6740.93	8830.99	7784.83	3879.97	3977.12	154.893
t.test		0.52823	0.0938631	0.456785	0.158566	0.615187	5.39517e-07
