# Supplementary material for: XAB2 dynamics during DNA damage-dependent transcription inhibition
Source: eLife. 2022 Jul 26;11:e77094. doi: 10.7554/eLife.77094 (PMC9436415; doi:10.7554/eLife.77094)
Supplement: Figure 3—figure supplement 2—source data 1. [file elife-77094-fig3-figsupp2-data1.xlsx]

## Sheet: Data
	siMock						siAQR						siPRP19						siCCDC16						siPPIE						siISY1						siXAB2						siXPF
Paste	Area	Mean	IntDen	RawIntDen		Paste	Area	Mean	IntDen	RawIntDen		Paste	Area	Mean	IntDen	RawIntDen		Paste	Area	Mean	IntDen	RawIntDen		Paste	Area	Mean	IntDen	RawIntDen		Paste	Area	Mean	IntDen	RawIntDen		Paste	Area	Mean	IntDen	RawIntDen		Paste	Area	Mean	IntDen	RawIntDen
1	3.183	128.615	409.435	85529		1	3.375	130.313	439.757	93304		1	3.375	107.358	362.291	76868		1	3.375	179.804	606.772	128740		1	3.375	107.845	363.936	77217		1	3.375	134.716	454.617	96457		1	3.375	37.848	127.722	27099		1	3.375	62.408	210.603	44684
1	3.356	182.055	611.038	147829		1	3.375	85.744	289.355	61393		1	3.375	184.539	622.75	132130								2	3.375	105.145	354.826	75284		1	3.375	87.115	293.979	62374		1	3.375	32.743	110.495	23444		1	3.375	23.778	80.242	17025
1	3.356	95.081	319.124	77206		1	3.375	87.809	296.321	62871		1	3.375	93.235	314.632	66756		1	3.375	48.966	165.243	35060		1	3.375	73.993	249.699	52979		1	3.375	102.176	344.806	73158		2	3.375	29.059	98.062	20806		1	3.375	26.23	88.518	18781
2	3.356	118.993	399.378	96622		1	3.375	145.082	489.599	103879		1	3.375	114.416	386.112	81922		1	3.375	73.691	248.681	52763		1	3.375	195.774	660.663	140174		1	3.375	56.493	190.643	40449		1	3.375	27.073	91.36	19384		2	3.375	21.962	74.114	15725
1	3.356	105.639	354.56	85779		1	3.375	101.226	341.601	72478		2	3.375	140.229	473.22	100404		1	3.375	109.075	368.089	78098		1	3.375	116.76	394.02	83600		1	3.375	66.997	226.09	47970		2	3.375	15.739	53.113	11269		1	3.375	49.865	168.274	35703
1	3.356	153.01	513.551	124244		2	3.375	100.725	339.909	72119		1	3.375	173.634	585.95	124322								1	3.375	221.137	746.254	158334		1	3.375	110.542	373.037	79148		3	3.375	17.838	60.197	12772		1	3.375	66.77	225.322	47807
1	3.356	98.679	331.198	80127		2	3.375	80.659	272.195	57752		2	3.375	161.592	545.313	115700		1	3.375	45.729	154.318	32742		2	3.375	177.33	598.421	126968		1	3.375	121.454	409.861	86961		1	3.375	17.916	60.46	12828		1	3.375	46.827	158.023	33528
2	3.356	124.951	419.376	101460		32	3.183	97.57	310.606	64884		1	3.375	102.021	344.282	73047		1	3.375	99.919	337.189	71542		1	3.375	76.134	256.924	54512		1	3.375	75.095	253.417	53768		1	3.375	23.444	79.115	16786		1	3.375	67.813	228.843	48554
1	3.827	100.516	384.684	81619		34	3.183	90.09	286.795	59910		1	3.375	161.675	545.591	115759								1	3.375	145.141	489.797	103921		2	3.375	37.341	126.011	26736		1	3.375	31.774	107.224	22750		1	3.375	36.682	123.786	26264
1	3.827	67.431	258.064	54754		36	3.183	78.122	248.694	51951		63	3.183	194.795	620.115	129539		1	3.375	73.83	249.147	52862		2	3.375	108.43	365.911	77636		1	3.375	199.515	673.289	142853		1	3.375	18.975	64.033	13586		1	3.375	69.06	233.052	49447
2	3.827	75.615	289.383	61399		38	3.183	73.143	232.844	48640		67	3.183	130.104	414.174	86519		1	3.375	83.398	281.437	59713		3	3.375	90.546	305.559	64831		2	3.375	155.006	523.086	110984		1	3.375	26.844	90.587	19220		1	3.375	52.105	175.834	37307
1	3.827	127.479	487.874	103513		48	3.183	81.62	259.829	54277		72	3.183	133.212	424.069	88586		1	3.375	80.293	270.96	57490		1	3.375	78.577	265.167	56261		1	3.375	84.599	285.49	60573		1	3.375	25.249	85.205	18078		1	3.375	35.471	119.7	25397
1	3.827	133.341	510.308	108273		50	3.183	63.995	203.724	42557		74	3.183	92.319	293.889	61392		1	3.375	87.894	296.609	62932		2	3.375	98.513	332.443	70535		2	3.375	88.939	300.134	63680		1	3.375	57.528	194.135	41190		1	3.375	67.278	227.038	48171
3	3.183	40.078	127.586	26652		52	3.183	85.069	270.811	56571		76	3.183	92.344	293.971	61409		1	3.375	66.496	224.398	47611		3	3.375	78.197	263.885	55989		1	3.375	77.803	262.556	55707		1	3.375	23.366	78.851	16730		1	3.375	135.45	457.092	96982
4	3.183	58.361	185.787	38810		1	3.375	199.951	674.76	143165		78	3.183	163.774	521.362	108910		1	3.375	65.184	219.973	46672		1	3.375	65.263	220.237	46728		1	3.375	134.341	453.35	96188		2	3.375	20.497	69.17	14676		1	3.375	23.222	78.366	16627
9	3.183	174.377	555.116	115961								80	3.183	117.179	373.029	77924		1	3.375	113.722	383.769	81425		2	3.375	56.353	190.171	40349		1	3.375	117.996	398.191	84485		1	3.375	31.024	104.693	22213		1	3.375	55.297	186.608	39593
11	3.183	161.164	513.052	107174								81	3.183	97.487	310.342	64829		2	3.375	100.75	339.993	72137		3	3.375	53.725	181.301	38467		1	3.375	135.128	456.008	96752		2	3.375	26.197	88.405	18757		2	3.375	33.168	111.928	23748
16	3.183	150.147	477.982	99848								83	3.183	103.14	328.337	68588		1	3.375	166.996	563.548	119569		4	3.375	39.06	131.813	27967		1	3.375	146.797	495.386	105107		1	3.375	30.453	102.766	21804		1	3.375	36.52	123.24	26148
24	3.183	188.173	599.033	125135								85	3.183	167.659	533.727	111493		1	3.375	109.682	370.134	78532		1	3.375	105.682	356.636	75668								2	3.375	26.372	88.994	18882		1	3.375	7.911	26.695	5664
												87	3.183	98.223	312.683	65318		2	3.375	69.419	234.263	49704		2	3.375	161.969	546.585	115970								1	3.375	18.268	61.648	13080		1	3.375	36.307	122.523	25996
																		1	3.375	165.846	559.669	118746		1	3.375	40.602	137.016	29071								2	3.375	56.513	190.709	40463
																		1	3.375	77.867	262.773	55753		1	3.375	141.116	476.213	101039								1	3.375	43.789	147.772	31353
																								1	3.375	116.81	394.19	83636								1	3.375	79.082	266.873	56623
																								1	3.375	172.054	580.619	123191								1	3.375	16.218	54.729	11612
																								1	3.375	81.001	273.349	57997								2	3.375	17.45	58.886	12494
																								1	3.375	145.124	489.74	103909								1	3.375	16.891	57.001	12094
																								1	3.375	174.582	589.15	125001
																								1	3.375	166.599	562.21	119285
																								1	3.375	106.418	359.119	76195
																								1	3.375	112.985	381.281	80897
	Mean	120.195	100				Mean	100.075	83.2601				Mean	131.447	109.361				Mean	95.7137	79.632				Mean	113.762	94.648				Mean	107.336	89.3018				Mean	29.5442	24.5802				Mean	47.7062	39.6907
	SD	42.2052	35.1139				SD	34.6725	28.8468				SD	34.3287	28.5608				SD	38.5183	32.0465				SD	47.3547	39.3982				SD	40.0112	33.2886				SD	15.0343	12.5082				SD	27.3588	22.762
	SEM	9.68253	8.05569				SEM	8.95239	7.44822				SEM	7.67613	6.3864				SEM	8.8367	7.35197				SEM	8.64574	7.19309				SEM	9.43074	7.8462				SEM	2.94846	2.45307				SEM	6.11762	5.08975

## Sheet: p-value
	siMock	siAQR	siPRP19	siCCDC16	siPPIE	siISY1	siXAB2	siXPF
	128.615	130.313	107.358	179.804	107.845	134.716	37.848	62.408
	182.055	85.744	184.539	48.966	105.145	87.115	32.743	23.778
	95.081	87.809	93.235	73.691	73.993	102.176	29.059	26.23
	118.993	145.082	114.416	109.075	195.774	56.493	27.073	21.962
	105.639	101.226	140.229	45.729	116.76	66.997	15.739	49.865
	153.01	100.725	173.634	99.919	221.137	110.542	17.838	66.77
	98.679	80.659	161.592	73.83	177.33	121.454	17.916	46.827
	124.951	97.57	102.021	83.398	76.134	75.095	23.444	67.813
	100.516	90.09	161.675	80.293	145.141	37.341	31.774	36.682
	67.431	78.122	194.795	87.894	108.43	199.515	18.975	69.06
	75.615	73.143	130.104	66.496	90.546	155.006	26.844	52.105
	127.479	81.62	133.212	65.184	78.577	84.599	25.249	35.471
	133.341	63.995	92.319	113.722	98.513	88.939	57.528	67.278
	40.078	85.069	92.344	100.75	78.197	77.803	23.366	135.45
	58.361	199.951	163.774	166.996	65.263	134.341	20.497	23.222
	174.377		117.179	109.682	56.353	117.996	31.024	55.297
	161.164		97.487	69.419	53.725	135.128	26.197	33.168
	150.147		103.14	165.846	39.06	146.797	30.453	36.52
	188.173		167.659	77.867	105.682		26.372	7.911
			98.223		161.969		18.268	36.307
					40.602		56.513
					141.116		43.789
					116.81		79.082
					172.054		16.218
					81.001		17.45
					145.124		16.891
					174.582
					166.599
					106.418
					112.985
Variance	1687.53	1122.03	1119.54	1405.57	2167.72	1511.96	217.336	711.081
t.test		0.13691	0.368772	0.0700505	0.622802	0.347951	1.11184e-08	5.09831e-07
