# Supplementary material for: XAB2 dynamics during DNA damage-dependent transcription inhibition
Source: eLife. 2022 Jul 26;11:e77094. doi: 10.7554/eLife.77094 (PMC9436415; doi:10.7554/eLife.77094)
Supplement: Figure 3—figure supplement 3—source data 1. [file elife-77094-fig3-figsupp3-data1.xlsx]

## Sheet: Graph
	No UV	0h UV	3h UV	16h UV	24h UV
siMock	100	#REF!	47.4379	91.3615	#REF!
	49.5979	#REF!	32.6351	68.9525	#REF!
	8.26632	#REF!	4.71047	10.2788	#REF!
	No UV	0h UV	3h UV	16h UV	24h UV
siAQR	100	#REF!	56.5991	99.9008	#REF!
	68.2974	#REF!	27.2279	49.7432	#REF!
	9.38137	#REF!	4.20135	7.33423	#REF!
	No UV	0h UV	3h UV	16h UV	24h UV
siPRP19	100	#REF!	41.9817	92.5784	#REF!
	80.388	#REF!	28.341	53.0184	#REF!
	11.2566	#REF!	4.32196	7.81713	#REF!
	No UV	0h UV	3h UV	16h UV	24h UV
siCCDC16	100	#REF!	54.5347	148.868	#REF!
	41.2406	#REF!	35.8278	69.0385	#REF!
	6.21725	#REF!	5.06682	9.76352	#REF!
	No UV	0h UV	3h UV	16h UV	24h UV
siPPIE	100	#REF!	64.7886	102.533	#REF!
	59.4892	#REF!	35.385	56.4217	#REF!
	9.07202	#REF!	5.21724	8.8116	#REF!
	No UV	0h UV	3h UV	16h UV	24h UV
siISY1	100	#REF!	26.9717	156.186	#REF!
	40.6825	#REF!	15.9808	60.878	#REF!
	6.35354	#REF!	2.15485	9.28381	#REF!
	No UV	0h	3h	16h	24h
siXPF	100	#REF!	38.769	43.964	#REF!
	62.9708	#REF!	23.5078	30.2626	#REF!
	10.3523	#REF!	3.86467	4.51128	#REF!
	No UV	0h UV	3h UV	16h UV	24h UV
siXAB2	100	15	9	5	8
	38.4	8.3	3.4	1.9	7.4
	6.15	1.43	0.7	0.33	1.18

## Sheet: p-value
%NoUV	siMock	siAQR	siPRP19	siCCDC16	siPPIE	siISY1	siXPF		%16h	siMock	siAQR	siPRP19	siCCDC16	siPPIE	siISY1	siXPF
	0.900219	2.28703		0.315265	0.478104	1.52749	1.287					0.269428	0.943525	0.863823	1.86831	0.253987
	0.665908	0.534789	0.858767	0.500352	0.575836	1.6477	0.212602			1.76026	0.605561	0.338645	1.37509	1.24094	0.489057	0.306338
	0.843141	1.87052	0.767521	1.2961	0.611636	1.12109	1.10264			1.0298	0.546207	0.282251	1.32259	0.778243	2.5211	0.384186
	0.795971	0.61809	0.48305	1.26535	0.657167	1.09176	0.978625			2.55422	1.15306	0.3752	0.971847	0.162395	1.47132	0.428445
	0.935169	0.242353	1.69818	1.06244	0.535378		0.454691			1.77868	2.20712	0.997601	1.81978	1.39792	0.230582	0.737888
	0.467766	0.561976	1.49253	0.609391	0.671633	0.639469	0.602831			0.501509	1.03976	1.17809	0.329483	1.37025	1.40968	0.48334
	1.60872	0.909118			0.358906	1.32378	1.05983			0.270472	0.615558	0.289178	1.59728		1.00232	0.709364
		0.699577	1.9708		0.349042	1.11856	0.558649			0.54633	1.61492	0.449954	2.49821		0.966326	0.79115
	1.14725	0.531204	0.497049	1.31396	0.341218		0.283595			0.355427	0.303164	0.572159	1.804		1.31444	0.50589
	1.52762	0.790213	1.1087	1.20037	0.579401	1.52861	0.282326			1.2587	0.488562	0.814952	0.585932		2.92865	0.358986
	2.05478	0.799848	0.0850003	1.14899	1.66872	0.541601	1.47735			0.398239	0.739478	1.64248	0.821202	1.34182	1.46971	0.68404
	0.670716	0.104592	0.400543		1.61556	1.24648	1.48631				0.777295	1.83858	2.49033	1.16696		0.479153
		0.0359561	1.06225	1.12443	0.660855	1.1779	0.245112			0.732533	1.26562	0.870872	1.23394	0.525284	0.774138	0.950894
	0.255197	0.526326	1.23371	1.57521	0.622542	1.1944	2.01595				0.941658	0.670124		1.60287	0.766469	0.771112
		0.889045	0.778632	1.03699	0.679938	1.01367	0.61042				1.35413	0.428986	1.08941	1.54719	1.98631
	0.82726	0.559664	1.25589	1.24795	1.0951	0.806997	0.675223			0.116093	0.590561	0.907585	1.79881	1.13827	1.47897
	0.757354	0.43186	0.537886	0.384275	1.69195	1.15715	1.45199			1.18055	0.637775	0.364597		0.946626	1.6865	0.0455271
	1.41264	1.91034	1.06705	0.567553	0.766154	1.22029	0.462948			0.930389	0.863707	0.628773		0.836241	2.11355	0.0876517
		0.854179	1.05767	0.605249	0.775525	1.13767	1.45628			0.244975	0.893338	1.25621	0.471837	0.300637	1.68996	0.0613618
	1.46922	0.905868	3.19076	0.496865	0.749623	0.991126	2.46061			1.01689	0.526232	1.00417	1.22128	0.287607	1.71476	0.0489515
	1.3205				0.668815	1.24078	1.00507				1.59158	1.42352			1.39979	0.00293672
	1.44657	1.3509	0.826257		1.11942	0.134348	1.8358			0.34426	0.317111	1.05999			2.09458	0.209337
	0.133176	1.04474	0.682896	0.483352	0.724214	0.334744	1.37047			2.59082	0.690017	0.841385			1.56981
	1.41834	2.07731	0.765454	0.608665	0.732329	0.403187	1.31145			0.286658	2.03087	1.51416	1.68381	0.14175		0.276829
	0.782926	0.50773	0.0147925	1.30951	0.138258	0.620007	1.90534			0.389721	0.810935	1.78006	1.62726		2.31811	0.200654
	1.87586	0.413603	0.797054	0.880074	0.896867	0.443989	0.419008			0.412523	1.49479	0.974554	2.09785		1.47082	0.244833
	1.7556	1.01719	0.875046	1.70066	0.429969	0.571234				0.319339	0.793602	0.914492	2.5465	0.124879	1.43265	0.492365
	0.760614	1.59013	0.863106	0.850724	1.45227	1.42955	1.54482			0.653952	0.6693	1.23782	1.00951	0.75886	1.39405	0.561378
		1.08053	0.448404	0.844036	1.64099	1.25447	1.13158			0.731941	1.757	0.970377	1.36369			0.493796
	1.00573	0.482476	0.173906	1.16658	2.70862	1.23405	0.81464			0.266572	0.964877	1.16915	0.870889	0.0819123		0.456207
		1.2405	0.0638178		1.1475	1.04214	0.452805			0.764339	1.55465	1.13748	1.95236	0.17967	2.18423	0.535582
	0.601798	0.699577	3.31958	0.646836	0.807001	1.43922	0.825402			0.72211	1.44645	0.0446892	2.19423		2.06617
	1.82123	0.95016	1.29871	0.674414	2.14786	1.16938	1.48478			1.12087	1.85367	0.830185	0.505192	0.985032	1.07681
	0.0428655	0.553597	0.581006	1.31557	0.771621	0.599576	0.497544			0.0277997	1.42346	1.19128	1.92616	1.02502	2.66079
	0.338884	2.36355	0.31376	0.432091	0.811437	0.794179	0.338662			2.02017	0.710033	0.893991	2.15906	1.45264		0.0353655
	0.651637	0.565593	0.288727	0.942988	0.647318		0.872358			0.540211	0.449984	0.302827	2.83096	1.2782
	0.813149	0.993575	0.359559	1.32837	0.625611	0.677404	2.23987			1.11613	1.36177	2.75422		2.05784	0.910314
	0.620344	1.08483	0.483043	1.21108	1.18878	1.51796					0.683667	0.137744		1.33434	1.6212	0.0905355
	1.12143	0.476511	0.908458	0.647025	1.82243	0.633315				1.42959	1.79558	0.857723	1.85637	1.18871	1.04395
	1.00635	0.430065	0.473823	0.738449	1.43621	0.494082					1.1033	0.556572	2.68205	1.80183	1.0014
	0.957365	0.575064	3.29613	2.00727	1.59517	0.686265					0.21922	1.07647	1.33878	1.26695	1.60851	0.0457128
	1.1867	2.4416	1.91918	1.13493	1.42883	0.518994				2.57669	1.27637	1.72218			2.73773
		0.475033	0.429896	1.00517	2.57421	1.53363				2.00187	1.06905	1.32138				0.0572859
		1.40181	1.61453	0.335078		1.74175				0.686107	0.611198	1.19748	1.03134	0.945068	2.3812	0.317358
		0.867509	1.21433	1.73986						0.515984	0.662418	1.12409	2.74525	0.935607	2.24669	0.224086
		0.778415	0.46563	1.16465						0.430215	0.2875	0.372399	2.80515	0.746395	1.29407	0.365565
		2.18392	1.43201	0.838494						1.77279	1.16229		0.579671	1.03135	1.10214	0.567641
		2.87684	1.38707							1.77654			0.647127	1.31057	1.24466	0.484245
		0.938032		1.55016						0.592439			1.23195	0.996343	1.25334	0.348475
		1.65236	0.684708	1.44562						0.234881			0.555236	1.70122	1.16493	0.216311
		2.09407	2.89668	1.24759						0.518258			1.02806	2.6305		1.03781
		1.54268	0.4071							0.680805			1.62658	1.53958		0.636923
		0.424497	0.660223							0.914035			0.825142	0.759276		1.1461
			1.52612													0.748535
													1.35928			0.824729
Variance	0.239162	0.436465	0.625124	0.166213	0.345666	0.16147	0.354415						1.30305			1.07495
t.test		0.856136	0.892878	1	1	1	0.796338
													2.0838
													2.24069
													0.514694
									Variance	0.464879	0.242059	0.274984	0.486259	0.303256	0.361994	0.0895473
									t.test		0.500822	0.925151	0.000130409	0.336598	1.06604e-05	8.27462e-05

## Sheet: siMock
No UV						3h post UV						16h post UV
	Area	Mean	IntDen	RawIntDen			Area	Mean	IntDen	RawIntDen			Area	Mean	IntDen	RawIntDen
1	162.249	396.271	64294.4	2884850		1	142.101	2.979	423.318	18994		1	205.329	1944.03	399165		17910300
2	197.663	240.611	47559.7	2133976		2	122.645	60.091	7369.9	330683		2	185.36	678.243	125719	5640946
3	153.512	392.267	60217.8	2701937		3	152.286	85.449	13012.7	583872		3	175.643	418.743	73549.4	3300117
4	124.851	455.333	56848.9	2550776		4	251.329	92.903	23349.3	1047670		4	203.257	897.507	182424	8185261
5	151.952	439.55	66790.5	2996850		5	192.514	15.525	2988.74	134103		5	249.123	509.927	127034	5699960
6	136.552	244.656	33408.3	1499008		6	215.358	-1.97	-424.209		-19034	6	99.489	360.022	35818.2	1607140
7	193.049	595.164	114896	5155309		7	200.827	95.63	19205.1	861719		7	107.245	180.124	19317.3	866757
8	201.719	1006.51	203032		9109911	8	248.41	101.154	25127.7	1127465		8	169.759	229.851	39019.4	1750775
9	156.41	523.867	81937.8	3676500		9	221.487	99.69	22080.2	990723		9	185.628	136.752	25384.9	1139006
10	149.3	730.768	109104	4895418		10	140.43	60.171	8449.82	379138		10	188.235	477.58	89897.4	4033639
11	189.55	774.221	146754	6584752		11	248.833	167.413	41658	1869171		11	181.059	157.09	28442.5	1276199
12	161.335	296.917	47903.1	2149381		12	166.171	130.87	21746.8	975767		12	124.316	-81.021	-10072.2		-451934
13	199.914	1029.55	205821		9235084	13	139.583	65.29	9113.41	408913		1	320.798	163.088	52318.1	2347482
14	154.381	118.061	18226.4	817807		14	200.448	121.894	24433.5	1096317		2	166.617	-147.681	-24606.1		-1104061
15	214.601	1341.57	287902		12917997	15	188.636	167.34	31566.4	1416366		3	223.56	-3.239	-724.057		-32488
16	165.77	356.419	59083.6	2651045		16	152.153	200.514	30508.8	1368910		4	137.466	60.317	8291.47	372033
17	192.693	280.71	54090.8	2427022		17	197.128	123.584	24361.9	1093102		5	175.844	479.492	84315.6	3783189
18	146.737	687.57	100892	4526959		18	186.163	135.165	25162.7	1129036		6	200.916	330.73	66449.1	2981531
19	249.68	917.369	229049		10277284	19	158.215	75.721	11980.2	537543		7	136.686	128.004	17496.3	785050
20	153.936	681.669	104933	4708287		20	156.855	14.663	2299.99	103199		8	173.303	419.075	72626.9	3258725
21	140.185	672.766	94311.5	4231697		21	126.278	27.934	3527.46	158275		9	141.633	-117.161	-16593.9		-744558
22	177.538	581.936	103315	4635701		22	192.002	58.765	11282.9	506257		1	189.104	130.02	24587.3	1103218
1	255.987	37.156	9511.52	426776		23	186.631	-27.592	-5149.57	-231058		2	242.615	762.681	185038	8302548
2	202.276	500.796	101299	4545223		24	126.723	110.747	14034.2	629705		3	193.428	105.845	20473.4	918627
3	251.263	222.545	55917.2	2508972		25	134.056	130.862	17542.8	787134		4	135.66	205.176	27834.2	1248904
4	203.702	657.702	133976	6011400		26	150.593	111.016	16718.2	750134		5	131.849	223.458	29462.7	1321975
5	221.331	566.509	125386	5625996		27	137.533	78.451	10789.6	484124		6	87.654	260.198	22807.5	1023357
6	206.198	263.453	54323.7	2437471		28	130.289	-107.188	-13965.4		-626619	7	184.669	252.916	46705.8	2095661
7	228.775	839.26	192002		8615003	1	222.223	202.378	44973.1	2017914		8	181.393	288.191	52275.8	2345585
8	203.925	352.238	71830.2	3222975		2	178.54	221.418	39532.1	1773781		9	146.782	129.708	19038.8	854260
9	220.15	923.728	203359		9124583	3	177.827	254.743	45300.2	2032591		10	167.798	325.33	54589.7	2449408
10	225.276	190.792	42980.9	1928526		4	199.2	271.296	54042.4	2424848		11	152.977	337.133	51573.7	2314081
11	206.488	629.933	130074	5836333		5	127.169	279.544	35549.4	1595079		12	177.872	450.061	80053.2	3591938
12	153.2	19.984	3061.49	137367		6	272.212	301.147	81975.8	3678205		13	136.752	14.519	1985.47	89087
13	195.59	123.745	24203.3	1085989		7	189.06	345.163	65256.4	2928014		1	186.385	774.108	144282	6473864
14	165.28	281.586	46540.4	2088240		8	190.397	342.374	65187	2924901		2	211.793	182.17	38582.3	1731166
15	188.302	308.418	58075.8	2605825		9	160.488	275.236	44172.2	1981978		3	157.702	505.477	79714.8	3576752
16	133.744	331.272	44305.5	1987961		10	196.949	261.641	51530.1	2312123		4	188.882	1117.43	211063		9470250
17	162.338	493.374	80093.3	3593737		11	228.864	258.135	59077.8	2650786		5	140.608	726.15	102103	4581281
18	166.528	431.606	71874.3	3224957		12	213.999	206.632	44219	1984079		6	182.753	1669.06	305025		13686278
19	124.294	550.113	68375.8	3067979		13	176.691	283.963	50173.6	2251259		7	182.597	1392.88	254336		11411887
20	178.54	474.711	84755	3802907		14	217.075	282.841	61397.7	2754875		8	160.733	1144.93	184029	8257271
						15	162.093	355.248	57583.1	2583719		1	178.719	800.002	142975	6415217
						16	220.328	398.926	87894.6	3943778		2	159.842	306.568	49002.3	2198703
						17	165.057	369.988	61069.1	2740133		3	153.847	239.537	36852	1653527
						18	230.58	337.277	77769.5	3489471		4	147.339	208.542	30726.3	1378670
						19	206.622	182.508	37710.3	1692036		5	187.812	674.155	126614	5681108
						20	158.794	268.431	42625.4	1912574		6	189.015	671.278	126882	5693110
						21	188.948	267.276	50501.4	2265965		7	181.393	233.264	42312.5	1898534
						22	211.324	260.942	55143.5	2474256		8	138.357	121.247	16775.4	752702
												9	145.868	253.753	37014.4	1660814
												10	201.786	240.967	48623.7	2181715
												11	189.684	344.158	65281.1	2929125
		No UV	3h UV	16h UV
	Average	3.20461e+06	1.5202e+06	2.92778e+06
	SD	1.58942e+06	1.04583e+06	2.20966e+06
	SEM	264903	150952	329396
	Percentage	100	47.4379	91.3615
	SD	49.5979	32.6351	68.9525
	SEM	8.26632	4.71047	10.2788

## Sheet: siAQR
No UV						3h post UV						16h post UV
	Area	Mean	IntDen	RawIntDen			Area	Mean	IntDen	RawIntDen			Area	Mean	IntDen	RawIntDen
1	144.241	1069.14	154213	6919455		1	129.576	-41.838	-5421.25		-243248	1	157.212	-14.857	-2335.71		-104802
2	89.192	404.302	36060.6	1618017		2	107.334	88.505	9499.59	426241		2	120.84	337.908	40832.7	1832137
3	111.189	1134.36	126128	5659298		3	68.02	259.279	17636.1	791321		3	118.834	309.933	36830.5	1652562
4	108.626	383.677	41677.5	1870044		4	117.786	283.061	33340.8	1495980		4	135.259	574.826	77750.5	3488616
5	73.591	222.06	16341.7	733243		5	71.541	253.201	18114.2	812774		5	147.361	1009.93	148825	6677678
6	55.249	685.87	37893.8	1700271		6	146.47	322.992	47308.5	2122704		6	148.007	473.697	70110.6	3145820
7	84.646	724.212	61301.4	2750557		7	127.459	379.882	48419.4	2172548		7	89.683	462.819	41506.8	1862384
8	121.687	387.653	47172.2	2116587		8	110.766	252.67	27987.2	1255768		8	167.286	650.942	108893	4885968
9	63.696	562.341	35818.9	1607171		9	90.195	672.642	60669	2722183		1	104.838	194.989	20442.2	917229
10	92.669	574.99	53283.7	2390808		10	130.289	535.66	69790.7	3131468		2	136.218	241.845	32943.5	1478154
11	103.434	521.43	53933.4	2419958		1	129.509	67.271	8712.15	390909		3	88.635	562.561	49862.6	2237306
12	62.359	113.096	7052.56	316444		2	147.094	319.915	47057.5	2111440		4	111.056	471.949	52412.7	2351724
1	110.565	21.928	2424.5	108786		3	119.614	77.023	9213.07	413385		5	171.007	499.043	85340.1	3829157
2	78.049	454.715	35489.9	1592412		4	174.128	99.192	17272	774984		6	103.545	613.217	63495.6	2849008
3	134.724	444.967	59947.9	2689825		5	217.921	407.216	88741.2	3981762		7	178.251	512.249	91308.7	4096964
4	95.143	396.645	37737.9	1693277		6	160.198	343.067	54958.8	2465967		1	101.695	391.575	39821.3	1786756
5	80.055	363.753	29120.1	1306601		7	80.946	244.465	19788.5	887897		2	86.094	499.508	43004.8	1929601
6	133.231	966.84	128813	5779768		8	102.743	231.23	23757.1	1065968		3	124.918	466.22	58239.4	2613165
7	185.695	310.17	57596.9	2584337		9	143.416	298.97	42877.2	1923875		4	115.714	520.573	60237.4	2702815
8	198.688	307.428	61082.3	2740725		10	128.083	315.194	40371	1811420		5	101.138	350.843	35483.6	1592127
9	107.846	-148.137	-15976.1	-716837		11	155.251	444.645	69031.3	3097394		6	163.497	656.401	107319	4815357
10	123.068	740.164	91090.7	4087185		1	87.209	341.869	29814	1337734		7	111.524	191.732	21382.6	959426
11	118.366	595.159	70446.5	3160891		2	140.185	241.107	33799.5	1516562		8	134.033	347.134	46527.5	2087662
12	117.452	1192.59	140072	6284938		3	148.721	213.646	31773.5	1425657		1	150.749	908.404	136941	6144446
1	87.097	393.078	34236	1536148		4	161.134	250.536	40369.9	1811372		2	137.711	397.071	54681	2453502
2	127.971	217.932	27889.1	1251365		5	97.617	341.691	33354.8	1496608		3	171.877	586.425	100793	4522508
3	147.027	466.504	68588.6	3077527		6	111.212	363.232	40395.6	1812528		4	111.323	480.693	53512.2	2401060
4	83.041	1291.19	107222	4810983		1	164.611	145.175	23897.4	1072263		5	84.378	534.861	45130.6	2024983
5	118.054	617.173	72859.6	3269165		2	146.96	213.584	31388.3	1408373		1	112.593	1052.23	118474	5315850
1	101.093	321.812	32533.1	1459741		3	155.808	218.141	33988.1	1525023		2	132.184	492.203	65061.2	2919257
2	115.736	722.732	83646.1	3753148		4	144.798	192.898	27931.3	1253259		3	133.231	786.825	104830	4703640
3	95.455	494.183	47172.2	2116587		5	216.005	290.747	62802.7	2817920		4	137.399	709.855	97533.3	4376259
4	70.895	903.719	64068.8	2874729		6	99.935	420.461	42018.6	1885347		5	128.885	969.795	124992	5608323
5	91.934	406.041	37328.8	1674921		1	101.272	180.809	18310.8	821595		6	119.257	804.839	95982.9	4306695
6	154.292	1032.93	159373	7150969		2	146.247	324.85	47508.2	2131663		7	128.529	372.502	47877.2	2148220
7	131.783	289.399	38137.7	1711214		3	136.284	306.432	41761.9	1873829		8	129.977	233.443	30342.2	1361438
8	94.474	709.149	66996.3	3006082		4	165.413	449.702	74386.8	3337690		9	127.971	717.531	91823.5	4120065
1	138.914	526.582	73149.7	3282184		5	112.393	359.422	40396.5	1812566		1	101.16	455.706	46099.4	2068451
2	91.465	351.29	32130.9	1441696		1	91.265	-4.744	-432.923		-19425	2	166.974	725.115	121075	5432560
3	99.444	291.612	28999.1	1301172		2	130.579	243.1	31743.7	1424322		3	145.779	510.327	74394.8	3338047
4	72.12	537.661	38776.3	1739870		3	104.904	265.141	27814.5	1248018		4	140.541	105.178	14781.9	663255
5	148.787	1106.52	164636	7387103		4	119.547	530.597	63431.3	2846124		5	145.333	592.192	86065	3861682
6	131.783	243.061	32031.2	1437222		5	130.624	276.307	36092.2	1619436		6	105.328	684.393	72085.7	3234443
7	103.634	912.086	94523.2	4241198		6	100.915	350.642	35385	1587705		7	95.767	430.345	41212.8	1849194
8	73.837	792.233	58495.7	2624668								8	112.772	396.079	44666.5	2004159
1	93.917	558.878	52488.2	2355112								9	94.452	205.247	19386	869837
2	88.457	1664.78	147261	6607494								10	131.515	595.921	78372.5	3516527
3	89.972	2156.05	193984	8703953
4	80.277	787.906	63251.1	2838036
5	95.054	1172.16	111418	4999247
6	97.505	1448.15	141202	6335664
7	109.072	953.699	104022	4667401
8	70.493	406.046	28623.6	1284324
		No UV	3h UV	16h UV
	Average	3.02552e+06	1.71242e+06	3.02252e+06
	SD	2.06635e+06	823785	1.50499e+06
	SEM	283835	127113	221899
	Percentage	100	56.5991	99.9008
	SD	68.2974	27.2279	49.7432
	SEM	9.38137	4.20135	7.33423

## Sheet: siPRP19
No UV						3h post UV						16h post UV
	Area	Mean	IntDen	RawIntDen			Area	Mean	IntDen	RawIntDen			Area	Mean	IntDen	RawIntDen
1	175.353	-66.787	-11711.3		-525480	1	269.538	90.7	24447.2	1096931		1	125.743	158.576	19939.7	894683
2	267.688	237.423	63555.2	2851682		2	148.431	26.309	3905.14	175221		2	200.515	124.989	25062.3	1124528
3	187.165	303.487	56802.3	2548684		3	155.786	176.096	27433.2	1230912		3	172.122	121.36	20888.7	937264
4	197.261	181.228	35749.3	1604051		4	167.018	26.016	4345.1	194962		4	140.341	197.859	27767.6	1245915
5	263.766	476.477	125678	5639101		5	187.277	53.012	9927.84	445456		5	180.68	408.623	73829.9	3312704
6	240.877	458.568	110458	4956201		6	231.472	200.825	46485.3	2085769		6	143.617	607.081	87187.1	3912033
7	219.303	-5.73	-1256.54	-56380		7	99.667	224.294	22354.8	1003044		7	153.401	139.513	21401.4	960266
8	273.639	533.018	145854	6544389		8	55.026	203.062	11173.8	501361		8	258.082	129.028	33300	1494150
9	196.236	187.454	36785.3	1650535		9	194.03	256.913	49848.9	2236688		1	291.49	145.267	42344.1	1899953
10	229.444	357.613	82052.1	3681626		10	122.734	210.075	25783.3	1156883		2	216.852	278.128	60312.5	2706186
11	226.725	27.746	6290.66	282258		11	247.674	160.775	39819.8	1786689		3	277.962	437.31	121556	5454129
12	121.887	243.202	29643.2	1330072		12	190.754	80.339	15324.9	687619		4	252.266	539.387	136069	6105327
13	248.298	316.613	78614.6	3527390		13	135.839	291.073	39539	1774091		5	205.463	313.687	64451.1	2891880
14	210.856	433.015	91303.9	4096752		14	207.424	85.497	17734.3	795725		6	190.731	260.021	49594.2	2225262
15	106.665	540.238	57624.6	2585580		15	257.013	14.051	3611.35	162039		7	142.235	223.209	31748.2	1424522
16	179.254	518.512	92945.1	4170391		16	191.066	148.037	28284.8	1269123		8	217.008	309.519	67168.1	3013790
1	210.166	189.411	39807.6	1786143		1	136.596	74.234	10140.2	454983		1	115.736	233.142	26982.9	1210707
2	269.471	293.054	78969.5	3543314		2	57.901	228.456	13227.9	593529		2	299.558	155.342	46533.9	2087948
3	249.279	314.007	78275.5	3512173		3	144.887	242.329	35110.4	1575383		3	267.086	348.086	92969.1	4171465
4	211.726	1115.31	236140	10595471		4	140.809	176.597	24866.4	1115739		4	162.672	456.845	74315.9	3334509
5	217.075	1238.3	268804		12061071	5	181.393	215.616	39111.2	1754896		5	195.166	539.803	105351	4727055
6	177.916	343.696	61149.2	2743726		6	190.62	188.096	35854.8	1608783		6	134.033	585.283	78447.5	3519893
7	148.765	339.726	50539.4	2267674		7	105.529	74.822	7895.87	354283		7	151.596	410.756	62268.8	2793961
8	225.209	251.541	56649.4	2541822		8	230.781	307.335	70927.2	3182458		8	160.978	696.115	112060	5028042
9	107.467	10.187	1094.76	49121		9	242.927	430.356	104545	4690880		9	180.881	728.314	131738	5910999
10	159.329	370.227	58987.9	2646752		10	179.476	194.8	34962	1568725		1	235.015	306.892	72124.3	3236172
11	149.099	434.341	64759.9	2905739		11	247.229	97.403	24080.8	1080489		2	168.266	402.216	67679.3	3036728
12	144.954	440.666	63876.3	2866091		12	216.25	49.014	10599.2	475580		3	205.084	446.684	91607.7	4110382
13	156.031	212.684	33185.3	1489003		13	182.886	327.902	59968.8	2690762		4	139.538	514.662	71815.1	3222301
1	255.074	50.457	12870.4	577485		14	140.608	448.102	63006.8	2827076		5	184.09	470.019	86525.7	3882356
2	133.967	35.255	4723	211918		15	196.415	239.752	47090.7	2112932		6	187.5	448.969	84181.7	3777180
3	168.4	1458.87	245673	11023216		16	196.281	319.101	62633.3	2810320		7	123.67	26.743	3307.33	148398
4	159.062	604.26	96114.6	4312602		17	153.512	251.271	38573.1	1730752		8	123.804	496.268	61439.9	2756770
5	140.987	304.984	42998.8	1929331		1	199.802	-13.317	-2660.72		-119385	9	146.358	602.383	88163.7	3955851
6	111.345	208.545	23220.6	1041892		2	189.728	95.664	18150.1	814385		10	286.61	230.844	66162	2968650
7	195.233	109.448	21367.9	958766		3	156.164	126.358	19732.6	885388		1	150.66	148.756	22411.5	1005590
8	162.895	163.357	26610	1193976		4	132.563	55.988	7421.97	333019		2	257.548	791.439	203833	9145866
9	237.11	150.768	35748.8	1604025		5	144.954	104.815	15193.4	681718		3	151.038	67.493	10194.1	457401
10	179.833	373.862	67232.7	3016691		6	199.334	146.969	29295.9	1314489		4	186.118	341.063	63477.9	2848216
11	141.7	247.469	35066.5	1573411		7	131.649	172.304	22683.5	1017797		5	203.011	202.897	41190.5	1848193
12	157.613	1547.7	243938	10945358		8	234.169	-205.362	-48089.3		-2157737	6	275.578	289.091	79667.1	3574615
13	168.868	841.091	142033	6372950		9	194.498	269.153	52349.7	2348900		7	245.557	519.04	127454	5718786
1	185.048	171.931	31815.5	1427543		10	168.623	267.798	45156.9	2026163		8	191.712	510.097	97791.7	4387853
2	146.759	814.171	119487	5361315		11	214.957	208.192	44752.4	2008014		9	200.07	442.959	88622.6	3976441
3	123.001	730.637	89869.4	4032384		12	167.887	170.621	28645.1	1285290		10	211.124	394.04	83191.2	3732740
4	175.353	196.518	34460.1	1546203								11	143.907	191.515	27560.3	1236615
5	236.152	448.775	105979	4755219
6	226.881	452.455	102653	4605990
7	293.474	1028.8	301927		13547294
8	150.882	335.848	50673.5	2273688
9	193.473	1108.04	214376	9618912
10	178.585	168.706	30128.4	1351845
11	117.541	415.696	48861.4	2192382
12	212.617	531.208	112944	5067726
		No UV	3h UV	16h UV
	Average	3.32067e+06	1.39408e+06	3.07422e+06
	SD	2.66942e+06	941112	1.76056e+06
	SEM	373794	143518	259581
	Percentage	100	41.9817	92.5784
	SD	80.388	28.341	53.0184
	SEM	11.2566	4.32196	7.81713

## Sheet: siCCDC16
No UV						3h post UV						16h post UV
	Area	Mean	IntDen	RawIntDen			Area	Mean	IntDen	RawIntDen			Area	Mean	IntDen	RawIntDen
1	192.381	62.078	11942.5	535853		1	243.863	-46.863	-11428.1		-512771	1	260.913	136.987	35741.6	1603702
2	201.496	94.065	18953.8	850444		2	227.728	-16.901	-3848.88		-172697	2	279.879	186.115	52089.5	2337226
3	323.405	151.814	49097.4	2202970		3	312.752	110.674	34613.4	1553082		3	245.624	203.974	50100.9	2247997
4	335.931	142.686	47932.5	2150700		4	234.347	44.131	10342	464041		4	209.698	175.56	36814.5	1651842
5	291.959	137.849	40246.2	1805822		5	325.924	93.046	30326	1360709		5	319.661	215.649	68934.7	3093059
6	266.15	86.734	23084.3	1035778		6	163.073	51.87	8458.62	379533		6	230.268	54.202	12481.1	560019
7	341.926	4.931	1685.96		75648	7	197.261	119.873	23646.3	1060996		7	373.217	162.122	60506.5	2714891
8	227.594	27.346	6223.89		279262	8	220.886	-56.764	-12538.4		-562592	8	303.86	311.441	94634.4	4246188
9	246.939	201.564	49774.1	2233333		9	276.536	20.587	5693.1	255446		9	282.732	241.703	68337	3066240
10	242.727	187.335	45471.2	2040264		10	185.227	51.992	9630.35	432108		10	173.192	128.157	22195.6	995905
11	253.157	171.929	43524.9	1952936		11	261.47	118.48	30979	1390008		11	196.013	158.703	31107.9	1395791
12	341.502	235.499	80423.5		3608554	12	234.971	183.725	43170	1937010		12	284.247	331.88	94335.9	4232792
13	192.514	221.252	42594.3	1911178		13	191.088	167.775	32059.8	1438502		13	215.67	216.733	46742.9	2097325
14	273.55	218.134	59670.5	2677380		14	335.775	129.645	43531.6	1953238		14	346.851	320.188	111058		4983092
15	240.676	163.215	39282	1762561		15	332.476	-16.894	-5616.86		-252025	15	234.926	175.662	41267.7	1851658
16	309.476	152.753	47273.5	2121133		1	228.285	5.141	1173.61	52659		16	257.971	264.141	68140.6	3057427
1	323.049	45.06	14556.7	653149		2	250.059	-151.031	-37766.7		-1694568	17	181.46	286.417	51973.2	2332004
2	245.245	87.665	21499.4	964665		3	277.829	-88.89	-24696.3		-1108108	18	295.324	387.515	114443		5134965
3	283.445	80.888	22927.4	1028737		4	222.089	28.46	6320.66	283604		1	177.27	100.827	17873.6	801978
4	223.471	84.224	18821.7	844518		5	158.861	38.768	6158.79	276341		2	314.803	146.959	46263.1	2075795
5	172.768	10.957	1893.01		84938	6	222.869	22.509	5016.58	225091		3	223.248	248.719	55526	2491418
6	170.673	10.666	1820.44		81682	7	351.286	25.228	8862.17	397640		4	201.83	730.198	147376		6612669
7	290.287	63.075	18309.8	821549		8	205.842	21.681	4462.95	200250		5	341.346	396.298	135275		6069700
8	246.471	93.548	23056.8	1034543		9	265.682	131.46	34926.7	1567139		6	205.619	310.205	63784	2861951
9	210.7	235.431	49605.5	2225767		10	135.794	113.357	15393.3	690686		7	197.016	312.879	61642.2	2765847
10	218.679	152.452	33338	1495856		11	145.199	78.559	11406.8	511814		8	253.959	312.918	79468.5	3565701
11	262.139	245.758	64422.7	2890605		12	215.626	34.888	7522.75	337541		9	311.95	309.228	96463.5	4328260
12	197.796	162.926	32226.2	1445970		13	267.487	139.369	37279.4	1672703		10	159.374	239.947	38241.3	1715864
13	154.448	207.013	31972.8	1434601		14	188.302	137.252	25844.8	1159640		11	178.986	288.613	51657.7	2317851
14	196.972	224.352	44191	1982824		15	193.183	-4.223	-815.879		-36608	12	262.651	125.604	32990	1480243
15	192.559	-96.531	-18588		-834031	16	265.549	-24.192	-6424.05		-288243	13	302.01	244.883	73957.2	3318413
16	412.286	59.431	24502.7	1099423		1	191.623	29.34	5622.14	252262		1	291.045	285.589	83119.3	3729513
17	256.366	99.652	25547.4	1146297		2	337.491	31.604	10665.9	478572		2	172.813	110.739	19137.1	858671
18	264.167	188.649	49834.9	2236061		3	319.795	-87.065	-27842.8		-1249291	3	338.962	215.259	72964.6	3273878
19	187.856	87.13	16368	734422		4	333.858	64.194	21431.7	961626		4	186.296	439.017	81787.2	3669740
1	305.442	116.949	35721.2	1602789		5	275.578	89.441	24648	1105940		5	266.351	402.624	107239	4811762
2	283.088	177.754	50320	2257826		6	185.293	70.183	13004.4	583501		6	294.321	662.101	194870		8743706
3	248.499	184.616	45876.9	2058470		7	370.765	4.625	1714.64	76935		7	276.358	506.852	140072		6284965
4	230.625	106.276	24509.9	1099744		8	193.361	124.121	24000.1	1076870		8	193.963	362.549	70321.1	3155265
5	215.202	129.985	27973.1	1255137		9	186.853	123.365	23051.2	1034291		9	268.825	377.936	101598	4558661
6	284.938	266.855	76037.2	3411744		10	171.676	152.967	26260.7	1178303		10	169.849	298.584	50714.1	2275510
7	305.197	140.867	42992.1	1929030		11	174.105	171.799	29911.2	1342096		11	313.087	821.634	257242		11542309
8	272.591	139.685	38076.9	1708488		12	312.641	173.44	54224.3		2433013	1	219.504	644.823	141541		6350861
9	240.676	52.739	12693.1	569530		13	272.168	115.345	31393.3	1408596		2	208.583	187.302	39068	1752957
10	216.294	304.711	65907.4	2957223		14	201.295	36.8	7407.75	332381		3	230.536	451.09	103992	4666076
11	185.516	237.813	44118.1	1979553		1	252.065	21.195	5342.4	239710		4	220.841	481.169	106262	4767900
12	178.518	177.925	31762.9	1425182		2	372.994	100.763	37584	1686370		5	173.57	126.51	21958.5	985263
13	273.639	381.411	104369		4682966	3	347.319	119.691	41571.1	1865269		6	156.677	156.46	24513.8	1099917
14	298.355	196.817	58721.3	2634790		4	261.047	63.624	16608.9	745229		7	203.145	229.724	46667.3	2093934
15	280.993	194.884	54761.2	2457102		5	314.58	81.541	25651.1	1150950		8	201.474	104.395	21032.8	943731
16	255.297	185.118	47260	2120528		6	240.03	113.558	27257.3	1223017		9	156.031	249.591	38943.8	1747386
						7	153.847	123.745	19037.7	854209		10	198.666	310.151	61616.3	2764684
						8	333.078	136.234	45376.4	2036011		11	168.846	185.122	31257.1	1402488
						9	209.698	118.724	24896.1	1117073		12	320.597	418.697	134233		6022963
						10	236.286	109.648	25908.2	1162486		13	248.053	207.58	51490.9	2310363
						11	199.535	144.017	28736.4	1289383		14	188.235	262.229	49360.7	2214785
						12	205.508	54.602	11221.1	503485		15	222.29	519.202	115413		5178524
						13	261.448	35.053	9164.42	411202		16	214.957	367.218	78936.1	3541814
						14	192.225	19.673	3781.69	169682		17	181.794	466.897	84879.2	3808477
						15	206.288	-84.64	-17460.1		-783425	18	191.957	101.57	19497.1	874821
						16	292.672	187.396	54845.4	2460881
						17	283.868	223.728	63509.4		2849626
						18	255.23	193.045	49270.9	2210754
						19	224.318	48.278	10829.7	485922
		No UV	3h UV	16h UV
	Average	1.69969e+06	926922	2.5303e+06
	SD	700963	608963	1.17344e+06
	SEM	105674	86120.3	165950
	Percentage	100	54.5347	148.868
	SD	41.2406	35.8278	69.0385
	SEM	6.21725	5.06682	9.76352

## Sheet: siPPIE
No UV						3h post UV						16h post UV
	Area	Mean	IntDen	RawIntDen			Area	Mean	IntDen	RawIntDen			Area	Mean	IntDen	RawIntDen
1	238.737	17.732	4233.22		189942	1	154.805	58.674	9083.05	407551		1	262.295	148.291	38896	1745240
2	206.065	28.582	5889.67		264266	2	158.393	174.714	27673.5	1241691		2	377.629	147.967	55876.8	2507159
3	272.926	78.879	21528	965947		3	161.959	171.662	27802.2	1247469		3	255.096	137.37	35042.6	1572338
4	201.184	128.88	25928.6	1163400		4	139.471	106.225	14815.3	664753		4	271.388	26.944	7312.27	328097
5	189.595	145.26	27540.6	1235730		5	291.268	79.269	23088.6	1035972		5	201.451	312.459	62945.3	2824318
6	282.487	104.751	29590.8	1327719		6	246.961	278.522	68784.1		3086302	6	253.358	243.527	61699.5	2768420
7	191.445	125.921	24106.9	1081660		7	202.989	188.204	38203.3	1714158		7	307.76	392.667	120847		5422336
8	199.802	151.361	30242.2	1356947		8	154.849	20.305	3144.15	141076		8	320.352	378.176	121150		5435904
9	183.221	88.204	16160.7	725122		9	182.797	246.429	45046.5	2021210		9	264.122	449.738	118786		5329846
10	200.85	78.25	15716.6	705193		10	136.953	315.419	43197.6	1938248		10	370.921	313.547	116301		5218360
11	207.09	-7.367	-1525.69		-68457	11	171.074	329.319	56338	2527851		11	243.016	248.621	60419.1	2710968
12	198.844	2.027	403.148		18089	12	282.888	293.489	83024.6		3725262	12	352.356	149.126	52545.6	2357687
13	198.487	77.407	15364.3	689387		13	176.847	204.344	36137.5	1621468		13	107.913	219.18	23652.4	1061268
14	237.846	109.689	26089.1	1170604		14	164.812	184.84	30463.8	1366894		1	295.725	244.057	72173.7	3238389
15	245.914	305.549	75138.6	3371423		15	207.491	257.98	53528.5	2401791		2	352.936	197.392	69666.5	3125894
16	303.325	239.826	72745.1	3264028		16	98.887	207.375	20506.7	920122		3	255.386	200.691	51253.7	2299721
1	267.465	111.255	29756.8	1335171		17	218.233	241.686	52744	2366591		4	234.748	181.575	42624.5	1912534
2	228.641	122.601	28031.7	1257765		18	247.184	166.226	41088.5	1843616		5	165.302	227.79	37654.1	1689515
3	208.383	146.923	30616.1	1373726		1	177.471	64.974	11531	517391		6	219.437	61.69	13537	607398
4	334.839	147.265	49310	2212509		2	203.078	159.885	32469.2	1456875		7	212.194	61.031	12950.3	581073
5	299.023	254.779	76184.8	3418367		3	224.073	162.73	36463.3	1636084		8	242.593	47.903	11620.8	521419
6	245.535	140.502	34498.2	1547913		4	127.593	68.839	8783.36	394104		9	171.988	-26.262	-4516.73		-202663
7	202.031	172.846	34920.2	1566846		5	238.938	166.844	39865.4	1788734		10	154.805	-193.493	-29953.7		-1344004
8	185.917	181.553	33753.8	1514514		6	234.391	177.546	41615.3	1867252		11	271.833	23.48	6382.68	286387
9	259.397	116.097	30115.2	1351252		7	221.933	114.708	25457.5	1142262		12	155.005	-11.982	-1857.26		-83334
10	225.276	223.748	50405.1	2261647		8	175.398	218.326	38293.9	1718226		13	163.318	-54.828	-8954.39		-401778
11	205.463	158.714	32609.8	1463180		9	258.662	34.676	8969.34	402449		14	330.715	17.003	5623.01	252301
12	238.002	138.55	32975.2	1479575		10	295.19	237.653	70152.8		3147713	15	218.389	156.462	34169.8	1533176
13	179.075	34.764	6225.45	279332		11	319.26	148.431	47388.1	2126274		16	302.745	-185.64	-56201.7		-2521735
14	176	229.454	40383.9	1812002		12	244.153	298.414	72858.6		3269120	1	155.251	23.757	3688.33	165493
15	293.073	66.061	19360.5	868696		13	155.563	239.16	37204.4	1669339		2	164.879	49.067	8090.13	362999
16	207.714	314.82	65392.5	2934120		14	186.764	247.429	46210.9	2073453		3	278.319	-142.052	-39535.8		-1773949
1	242.014	305.314	73890.2	3315408		1	129.153	286.017	36939.9	1657471		4	230.09	192.767	44353.8	1990128
2	249.502	488.827	121963	5472416		2	148.787	113.257	16851.2	756103		5	186.519	247.45	46154.2	2070911
3	277.65	186.095	51669.2	2318367		3	154.693	193.455	29926.2	1342769		6	172.033	380.215	65409.4	2934878
4	134.234	270.702	36337.5	1630440		4	273.884	241.115	66037.6	2963065		7	243.44	236.421	57554.4	2582429
5	227.549	425.021	96713.2	4339462		5	147.205	168.626	24822.6	1113775		8	244.22	379.412	92660	4157598
6	172.3	201.65	34744.4	1558958		6	253.202	28.411	7193.72	322778		9	247.028	243.22	60082.2	2695850
7	154.849	235.953	36537.2	1639402		7	218.545	60.737	13273.7	595585		10	221.71	241.418	53524.8	2401625
8	187.009	155.86	29147.3	1307822		8	134.502	305.592	41102.6	1844249		11	282.553	287.139	81132.2	3640353
9	162.271	173.598	28169.9	1263964		9	143.238	188.477	26997	1211340		12	357.861	159.414	57048	2559710
10	183.02	6.384	1168.39		52425	1	258.885	172.657	44698.2	2005580		13	205.418	-254.302	-52238.2		-2343898
11	281.127	190.405	53528	2401767		2	307.403	70.67	21724.1	974749		1	231.048	-273.096	-63098.5		-2831189
12	348.456	235.495	82059.8	3681972		3	204.104	8.035	1640.01	73586		2	250.26	170.041	42554.3	1909385
13	217.387	297.485	64669.2	2901669		4	200.426	13.584	2722.57	122160		3	191.445	220.055	42128.3	1890272
14	206.823	347.287	71826.7	3222822		5	299.514	105.884	31713.6	1422969		4	152.019	221.081	33608.5	1507993
15	165.012	389.891	64336.8	2886755		6	182.084	-51.296	-9340.2		-419089	5	265.749	174.75	46439.6	2083717
16	286.253	404.925	115911	5200853		7	266.551	62.757	16728	750573		6	238.091	247.854	59011.9	2647826
						8	297.508	109.041	32440.7	1455593		7	193.517	231.83	44863.1	2012980
						9	95.187	-5.146	-489.866		-21980	8	214.868	356.508	76602.1	3437091
						10	110.387	14.701	1622.76	72812		9	245.067	483.319	118446	5314578
						11	103.523	274.37	28403.5	1274448		10	244.799	283.186	69323.8	3110515
												11	192.559	177.548	34188.5	1534017
		No UV	3h UV	16h UV
	Average	2.02037e+06	1.30897e+06	2.07155e+06
	SD	1.2019e+06	714908	1.13993e+06
	SEM	183288	105407	178027
	Percentage	100	64.7886	102.533
	SD	59.4892	35.385	56.4217
	SEM	9.07202	5.21724	8.8116

## Sheet: siISY1
No UV						3h post UV						16h post UV
	Area	Mean	IntDen	RawIntDen			Area	Mean	IntDen	RawIntDen			Area	Mean	IntDen	RawIntDen
1	299.87	725.782	217640	9765394		1	215.336	123.432	26579.5	1192604		1	246.582	1079.56	266201	11944268
2	243.908	962.525	234767	10533869		2	187.232	179.818	33667.7	1510647		2	326.124	213.667	69681.9	3126582
3	173.504	920.648	159736	7167244		3	192.537	132.062	25426.8	1140883		3	339.184	1059.05	359212	16117634
4	110.409	1408.9	155556	6979686		4	204.215	163.889	33468.6	1501714		4	269.493	777.89	209636	9406248
5	279.857	1025.05	286867		12871538	5	230.001	152.595	35097.1	1574784		5	258.952	126.872	32853.8	1474129
6	187.099	486.978	91112.9	4088179		6	165.101	196.361	32419.5	1454642		6	248.365	808.706	200855	9012220
7	199.223	946.756	188615	8463053		7	180.368	213.517	38511.6	1727990		7	212.327	672.604	142812	6407894
8	171.409	929.794	159375	7151044		8	193.45	55.773	10789.3	484110		8	202.878	678.655	137684	6177801
9	219.905	1316.92	289597		12994038	9	169.269	-89.436	-15138.7		-679266	9	255.207	733.848	187284	8403296
10	221.376	983.848	217800	9772559		10	288.259	51.838	14942.8	670474		10	176.98	2357.77	417280	18723086
11	138.669	556.494	77168.5	3462503		11	166.171	228.418	37956.6	1703088		11	241.568	866.865	209407	9395948
12	163.207	1088.19	177601	7968840		12	227.104	205.258	46614.9	2091583		12	168.868	2800.16	472858		21216829
13	150.303	1116.61	167830	7530431		13	270.519	151.553	40998	1839555		13	190.687	578.44	110301	4949130
14	159.418	1067.51	170180	7635871		14	262.473	231.651	60802	2728148		14	212.885	512.992	109208	4900102
15	155.942	926.176	144429	6480452		15	162.984	219.061	35703.5	1601992		15	239.205	1183.14	283013	12698618
16	178.986	642.41	114983	5159197		16	273.394	213.563	58386.8	2619778		16	229.288	919.047	210726	9455159
17	200.426	822.616	164874	7397783		17	169.269	283.514	47990.1	2153286		17	302.991	793.08	240296	10781926
18	214.289	811.382	173870	7801439		18	173.682	203.242	35299.5	1583867		18	220.663	1364.72	301143	13512116
19	178.54	907.904	162098	7273220		19	238.916	230.019	54955.1	2465802		1	267.911	898.767	240790	10804079
20	145.623	969.751	141218	6336350		1	244.688	8.035	1966.17	88221		2	267.844	912.181	244322	10962588
21	206.31	856.91	176789	7932414		2	152.866	17.258	2638.24	118376		3	227.795	875.548	199445	8948971
1	129.242	148.112	19142.2	858899		3	231.628	81.274	18825.3	844679		4	379.524	786.354	298440	13390826
2	208.071	229.225	47695	2140045		4	153.713	53.382	8205.53	368177		5	301.542	741.755	223670	10035943
3	182.976	313.959	57446.9	2577607		5	139.449	174.452	24327.2	1091546		6	270.63	1719.54	465360		20880424
4	190.509	463.706	88339.9	3963758		6	175.755	183.06	32173.6	1443608		7	325.055	1016.1	330289	14819856
5	142.614	443.579	63260.5	2838459		7	188.28	303.073	57062.5	2560359		8	339.14	617.932	209565	9403074
6	198.309	410.423	81390.5	3651944		8	247.318	388.549	96095	4311725		9	239.495	852.32	204127	9159033
7	268.334	759.07	203685	9139207		9	203.413	165.436	33651.8	1509937		10	267.8	741.704	198628	8912310
8	260.846	685.229	178739	8019921		10	170.317	147.466	25116	1126938		11	245.067	2090.37	512280		22985680
9	244.822	718.197	175830	7889391		11	150.66	149.305	22494.2	1009300		12	331.183	1574.65	521498		23399312
10	212.149	699.917	148487	6662511		12	160.533	149.103	23935.9	1073989		13	291.178	1068.81	311213	13963942
11	240.565	852.425	205064	9201077		13	208.071	82.909	17250.8	774034		14	268	1098.48	294392	13209205
12	232.118	717.803	166615	7475916		14	160.845	100.69	16195.5	726681		15	186.787	821.401	153427	6884162
13	180.078	474.398	85428.8	3833139		15	230.848	-32.675	-7542.87		-338444	16	284.247	1333.75	379115	17010649
14	207.112	546.353	113156	5077254		16	235.729	270.661	63802.5	2862780		17	301.163	1652.14	497564		22325411
15	332.097	903.039	299897		13456189	17	271.521	223.067	60567.4	2717620		18	293.92	2287.47	672332		30167147
16	148.832	648.503	96517.9	4330701		18	151.974	193.883	29465.2	1322087		1	239.829	540.815	129703	5819713
17	237.378	911.131	216282	9704453		19	194.565	322.878	62820.7	2818725		2	291.201	793.241	230992	10364491
18	151.417	595.943	90236	4048834		20	186.675	245.867	45897.2	2059381		3	193.294	769.522	148744	6674066
19	170.539	412.795	70397.9	3158710		21	166.372	129.089	21476.7	963647		4	239.139	596.65	142682	6402055
20	218.857	446.777	97780.5	4387351		1	152.264	111.236	16937.2	759962		5	218.345	1049.64	229184	10283345
21	178.028	415.369	73947.3	3317969		2	216.183	10.657	2303.89	103374		6	203.68	1915.15	390078	17502558
22	267.354	817.322	218514	9804599		3	193.317	10.399	2010.21	90197		7	306.824	1735.86	532602		23897514
23	332.699	745.924	248168	11135155		4	286.186	124.915	35748.9	1604030		8	210.634	1610.75	339278	15223181
						5	177.76	113.483	20172.8	905139		9	240.543	1330.8	320113	14363270
						6	142.503	-68.421	-9750.1		-437481	10	169.537	1087.56	184381	8273080
						7	298.043	197.064	58733.6	2635339		11	185.182	848.006	157035	7046081
						8	296.951	340.523	101119	4537133		12	145.89	1215.59	177342	7957236
						9	247.073	344.014	84996.5	3813741		13	239.651	745.16	178578	8012701
						10	216.762	344.074	74582.3	3346461		14	269.939	614.886	165982	7447502
						11	227.928	305.519	69636.3	3124538
						12	240.877	145.459	35037.7	1572118
						13	204.081	147.489	30099.8	1350559
						14	278.141	185.005	51457.5	2308868
						15	299.848	143.945	43161.6	1936635
						16	209.876	276.743	58081.6	2606086
						17	208.873	173.408	36220.3	1625182
						18	214.846	278.188	59767.5	2681729
		No UV	3h UV	16h UV
	Average	6.39308e+06	1.72432e+06	9985118
	SD	2.60087e+06	1.02167e+06	3.89198e+06
	SEM	406187	137761	593522
	Percentage	100	26.9717	156.186
	SD	40.6825	15.9808	60.878
	SEM	6.35354	2.15485	9.28381

## Sheet: siXPF
No UV						3h post UV						16h post UV
	Area	Mean	IntDen	RawIntDen			Area	Mean	IntDen	RawIntDen			Area	Mean	IntDen	RawIntDen
1	172.345	559.974	96508.6	4330281		1	267.064	65.217	17417.2	781498		1	169.314	112.488	19045.8	854572
2	115.647	137.855	15942.5	715329		2	246.092	37.333	9187.35	412231		2	176.668	130.026	22971.5	1030717
3	181.973	454.377	82684.2	3709990		3	254.204	91.643	23296.1	1045281		3	218.256	131.997	28809	1292644
4	232.23	316	73384.4	3292715		4	188.926	81.101	15322	687489		4	234.57	136.966	32128	1441562
5	133.499	255.404	34096.1	1529870		5	182.329	91.062	16603.3	744979		5	208.472	265.418	55332.2	2482723
6	153.936	293.659	45204.7	2028305		6	241.724	-52.283	-12638.1		-567062	6	186.586	194.25	36244.4	1626262
7	213.33	372.539	79473.8	3565939		7	227.416	-33.532	-7625.69		-342160	7	254.427	209.071	53193.3	2386749
8	139.917	299.403	41891.6	1879651		8	302.077	104.115	31450.6	1411169		8	301.052	197.063	59326.2	2661930
9	131.248	162.03	21266	954192		9	256.032	92.013	23558.4	1057051		9	273.973	138.464	37935.4	1702136
10	111.724	189.492	21170.9	949924		10	223.961	97.294	21790.2	977711		10	220.551	122.055	26919.4	1207858
1	183.978	602.149	110782	4970741		11	264.167	110.064	29075.3	1304589		11	273.171	187.774	51294.3	2301543
2	201.674	552.646	111455	5000897		12	234.302	169.126	39626.6	1778020		12	212.706	168.92	35930.4	1612176
3	119.101	154.325	18380.3	824713		13	301.319	182.526	54998.5	2467748		13	289.529	246.279	71305	3199412
4	191.378	789.909	151171	6782947		14	143.216	127.829	18307.1	821427		14	209.519	275.982	57823.6	2594509
5	129.598	353.197	45773.7	2053840		15	150.102	148.565	22300	1000587		1	159.864	-80.466	-12863.6		-577183
6	168.935	299.72	50633.1	2271878		16	239.517	91.609	21941.9	984518		2	198.309	-139.986	-27760.5		-1245596
7	203.702	534.509	108881	4885416		17	199.758	262.455	52427.4	2352386		3	173.816	19.641	3413.95	153182
8	157.39	220.568	34715.2	1557652		18	202.098	217.31	43917.9	1970571		4	248.789	26.419	6572.77	294916
1	286.743	380.838	109203	4899859		19	167.575	-118.739	-19897.6		-892795	5	128.127	35.912	4601.35	206460
2	266.997	691.074	184515	8279066		1	190.91	192.643	36777.4	1650179		6	143.884	25.512	3670.74	164704
3	339.586	221.939	75367.3	3381684		2	183.644	147.446	27077.6	1214954		7	186.943	1.178	220.217	9881
4	310.256	443.703	137661	6176786		3	223.025	125.057	27891	1251450		8	141.745	110.746	15697.6	704342
5	293.831	349.752	102768	4611132		4	222.869	177.918	39652.5	1779185		1	144.441	-33.003	-4766.97		-213891
6	155.451	632.623	98342	4412544		5	212.506	73.478	15614.6	700616		2	179.12	115.893	20758.7	931430
7	181.148	788.727	142876	6410769		6	188.859	-2.485	-469.295		-21057	3	205.307	73.288	15046.5	675126
8	148.988	210.892	31420.3	1409810		7	293.964	-32.977	-9694.09		-434968	4	201.875	90.944	18359.3	823772
1	169.202	-95.104	-16091.8	-722030		8	224.251	31.767	7123.83	319642		5	253.625	145.574	36921.1	1656628
2	262.027	442.098	115842	5197752		9	187.411	119.79	22449.9	1007314		6	286.899	146.728	42096.2	1888831
3	199.356	425.642	84854.4	3807364		10	209.252	33.062	6918.35	310422		7	217.119	170.544	37028.4	1661442
4	282.843	215.977	61087.7	2740967		11	150.704	131.553	19825.5	889559		8	207.447	164.909	34209.7	1534969
5	184.112	184.423	33954.6	1523522		12	251.664	163.503	41147.7	1846274		9	233.522	171.983	40161.9	1802039
6	246.805	250.783	61894.7	2777176		13	222.2	80.03	17782.7	797901		1	189.461	-183.691	-34802.3		-1561559
7	285.139	390.476	111340	4995753		1	187.99	-74.55	-14014.7		-628833	2	265.861	-12.782	-3398.26		-152478
8	147.896	252.269	37309.5	1674054		2	241.924	17.148	4148.51	186141		3	136.931	-209.854	-28735.5		-1289345
9	122.11	207.971	25395.3	1139473		3	241.612	108.61	26241.6	1177444		4	209.698	12.647	2651.96	118992
10	170.317	384.083	65415.8	2935166		4	185.784	61.527	11430.6	512886		5	143.483	-6.737	-966.672		-43374
11	251.307	668.353	167962	7536354		5	238.002	255.639	60842.6	2729970		6	194.342	-17.065	-3316.49		-148809
						6	277.405	233.454	64761.3	2905801		7	253.268	26.806	6789.02	304619
						7	314.089	261.126	82017	3680054		8	362.318	-73.872	-26765.3		-1200942
						8	157.301	179.199	28188.2	1264788		9	156.276	-98.647	-15416.2		-691715
						9	189.639	238.026	45139.1	2025364		10	136.218	25.165	3427.88	153807
						10	319.951	119.708	38300.7	1718531		11	238.091	-6.797	-1618.28		-72611
						11	186.675	59.493	11105.9	498317		1	169.693	25.315	4295.71	192746
												2	115.647	205.78	23797.8	1067794
												3	157.1	106.961	16803.6	753967
												4	187.923	145.872	27412.7	1229992
												5	235.261	180.931	42565.8	1909903
												6	183.934	197.42	36312.2	1629308
												7	188.213	138.838	26131.2	1172491
												8	218.189	74.342	16220.6	727809
												9	288.883	269.392	77822.8	3491861
												10	217.988	219.1	47761.2	2143014
												11	293.095	293.226	85943.1	3856216
												12	204.572	274.381	56130.6	2518547
												13	215.336	287.198	61844.2	2774911
												14	315.917	255.154	80607.4	3616804
		No UV	3h UV	16h UV
	Average	3.36463e+06	1.30443e+06	1.47923e+06
	SD	2.11874e+06	790953	1.01823e+06
	SEM	348318	130032	151788
	Percentage	100	38.769	43.964
	SD	62.9708	23.5078	30.2626
	SEM	10.3523	3.86467	4.51128
