# Supplementary material for: XAB2 dynamics during DNA damage-dependent transcription inhibition
Source: eLife. 2022 Jul 26;11:e77094. doi: 10.7554/eLife.77094 (PMC9436415; doi:10.7554/eLife.77094)
Supplement: Figure 3—source data 1. [file elife-77094-fig3-data1.xlsx]

## Sheet: XAB2
0h	1h														3h														16h
	BG						LD						Difference		BG						LD						Difference		BG						LD						Difference
	Paste	Area	Mean	IntDen	RawIntDen		Paste	Area	Mean	IntDen	RawIntDen				Paste	Area	Mean	IntDen	RawIntDen		Paste	Area	Mean	IntDen	RawIntDen				Paste	Area	Mean	IntDen	RawIntDen		Paste	Area	Mean	IntDen	RawIntDen
	1	3.183	801.102	2550.24	532733		2	3.183	685.898	2183.5	456122		-115.204		1	3.183	1177.16	3747.4	782813		2	3.183	669.368	2130.88	445130		-507.794		1	3.183	1679.06	5345.16	1116577		2	3.183	1507.97	4800.5	1002801		-171.092
	1	3.183	929.302	2958.36	617986		2	3.183	725.663	2310.09	482566		-203.639		1	3.183	1177.16	3747.4	782813		3	3.183	909.159	2894.23	604591		-268.003		3	3.183	1721.63	5480.68	1144887		4	3.183	1786.8	5688.13	1188223		65.167
	3	3.183	1380.43	4394.48	917986		4	3.183	870.842	2772.25	579110		-509.588		4	3.183	1123.44	3576.38	747087		5	3.183	725.94	2310.97	482750		-397.499		5	3.183	1930.96	6147.05	1284088		6	3.183	1493.78	4755.32	993362		-437.182
	5	3.183	844.624	2688.79	561675		6	3.183	656.023	2088.39	436255		-188.601		6	3.183	1076.61	3427.29	715944		7	3.183	879.689	2800.42	584993		-196.919		7	3.183	1659.55	5283.04	1103600		8	3.183	1285.74	4093.04	855016		-373.811
	7	3.183	1079.21	3435.58	717675		8	3.183	553.023	1760.5	367760		-526.188		8	3.183	801.442	2551.32	532959		9	3.183	570.848	1817.25	379614		-230.594		9	3.183	2021.07	6433.89	1344008		10	3.183	2266.65	7215.68	1507320		245.582
	9	3.183	1099.2	3499.22	730969		10	3.183	554.911	1766.51	369016		-544.291		10	3.183	658.574	2096.52	437952		11	3.183	433.901	1381.29	288544		-224.673		11	3.183	1394.5	4439.27	927342		12	3.183	1227.98	3909.16	816604		-166.523
	11	3.183	1048.35	3337.33	697152		12	3.183	628.202	1999.83	417754		-420.147		12	3.183	891.116	2836.79	592592		13	3.183	580.099	1846.7	385766		-311.017		13	3.183	1107.66	3526.13	736591		14	3.183	1129.96	3597.15	751427		22.309
	13	3.183	1100.71	3504.01	731971		14	3.183	865.513	2755.29	575566		-235.195		14	3.183	990.021	3151.65	658364		15	3.183	737.167	2346.71	490216		-252.854		15	3.183	1667.81	5309.32	1109091		16	3.183	1631.43	5193.53	1084902		-36.374
															16	3.183	784.997	2498.97	522023		17	3.183	647.853	2062.39	430822		-137.144
															18	3.183	719.311	2289.87	478342		19	3.183	421.102	1340.54	280033		-298.209
0												mean	-342.857													mean	-282.471													mean	-106.491
0												sd	175.072													sd	105.736													sd	227.885
0												sem	61.8974													sem	33.4368													sem	80.5696

## Sheet: AQR
No UV	1h															3h														16h
	BG	tout le noyau sans LD et sans nucléole					LD	cercle de taille différente dans le LD en évitant les gros spot					Difference			BG	tout le noyau sans LD et sans nucléole					LD	cercle de taille différente dans le LD en évitant les gros spot					Difference		BG	tout le noyau sans LD et sans nucléole					LD	cercle de taille différente dans le LD en évitant les gros spot					Difference
	Paste	Area	Mean	IntDen	RawIntDen		Paste	Area	Mean	IntDen	RawIntDen					Paste	Area	Mean	IntDen	RawIntDen		Paste	Area	Mean	IntDen	RawIntDen				Paste	Area	Mean	IntDen	RawIntDen		Paste	Area	Mean	IntDen	RawIntDen
880	1	74.573	1631.31	121653	252156736		2	9.572	1115.19	10674.4	22125443		-516.118			1	102.542	1605.88	164670	341320983		2	8.425	1396.12	11761.6	24378999		-209.759		1	99.083	2403.13	238109	493542861		2	7.543	2356.37	17773.1	36839437		-46.763
	1	95.234	1466.48	139659	289479802		2	5.701	1152.26	6568.6	13615146		-314.221			1	79.439	2292.82	182139	377531220		2	7.16	1956.45	14007.2	29033670		-336.373		1	109.468	2735	299393	620571200		2	4.198	2108.65	8852.66	18349453		-626.351
	1	110.74	1621.79	179597	372260951		3	4.888	1249.28	6106.1	12656490		-372.508			1	150.53	1595.28	240137	497746666		2	4.628	1170.64	5417.85	11229910		-424.639		1	104.878	2695.7	282721	586013004		2	5.859	2022.8	11851.3	24564823		-672.906
	1	87.931	1532.36	134741	279286600		2	4.532	1280.69	5804.24	12030805		-251.671			1	133.912	1536.02	205691	426349214		2	5.556	1042.18	5790.23	12001766		-493.835		1	117.265	2333.98	273695	567304977		2	7.908	1775.94	14044.6	29111196		-558.044
	1	81.159	1935.81	157109	325648933		2	3.694	936.306	3458.36	7168355			-999.499		1	110.283	1559.23	171957	356426598		2	12.279	793.125	9738.61	20185822			-766.108	1	115.159	2118.62	243979	505710285		2	7.085	1841.3	13045.2	27039556		-277.316
	1	93.487	1185.72	110849	229763337		1	5.828	836.036	4872.4	10099312		-349.68			1	100.339	965.055	96832.8	200711237		2	10.608	631.5	6699	13885428		-333.555		1	89.631	2293.96	205609	426179236		2	3.601	1642.44	5914.41	12259169		-651.523
	2	190.167	962.838	183100	379521712		2	5.932	555.047	3292.64	6824863		-407.791			2	115.582	1286.49	148694	308208103		2	5.533	1038.28	5744.49	11906951		-248.213		2	134.972	2032.79	274370	568703235		2	5.326	3085.81	16435.7	34067364			1053.02
	3	200.84	943.554	189503	392795080		3	5.546	599.312	3323.92	6889693		-344.242			3	138.052	1024.88	141487	293268241		2	6.28	483.009	3033.08	6286847		-541.87		3	125.171	1554.03	194519	403192256		2	7.219	1774.94	12813.9	26560145		220.909
	4	137.12	832.401	114139	236582413		4	8.145	1018.93	8299.35	17202575			186.528		4	89.546	1031	92322.4	191362226		2	5.274	966.532	5097.61	10566127		-64.47		4	117.258	1248.89	146442	303539039		2	5.826	1166.54	6796.32	14087149		-82.349
	5	110.646	1066.66	118021	244629535		5	3.943	370.716	1461.57	3029492			-695.942		5	149.937	1069.09	160296	332255699		2	8.175	624.68	5106.51	10584579		-444.412		5	129.398	1148.22	148577	307964966		2	8.416	1442.77	12142.1	25167631		294.548
	6	139.171	1121.32	156056	323467033		6	6.096	732.962	4468.3	9261709		-388.361			6	89.513	1201.06	107511	222844173		2	6.013	1460.94	8784.99	18209177			259.878	6	128.12	1416.28	181454	376111133		2	5.587	1314	7341	15216148		-102.282
	7	123.789	964.334	119374	247434667		7	8.46	899.772	7612.27	15778409		-64.562			7	95.883	1117.82	107180	222158359		2	6.384	1311.38	8371.54	17352209			193.559	7	179.96	1469.74	264495	548234680		2	4.653	1783.54	8298.33	17200465		313.802
	8	199.611	869.956	173653	359940733		2	6.353	513.419	3261.69	6760696		-356.537			8	82.008	1177.45	96560.7	200147356		2	12.372	1139.46	14097.3	29220416		-37.984		8	217.255	1404.06	305040	632274084		2	5.427	794.266	4310.15	8933908		-609.795
	9	169.335	1039.36	176000	364805895		2	3.707	914.497	3390.16	7026993		-124.866			9	118.654	1404.09	166601	345325077		2	7.237	1445.65	10461.8	21684790		41.561		9	125.801	1363.81	171570	355622665		2	7.509	798.859	5998.49	12433440		-564.955
	10	135.184	945.987	127882	265069263		2	5.434	696.257	3783.67	7842640		-249.73			10	111.542	1307.26	145814	302238083		2	10.512	1120.87	11782.2	24421585		-186.385		10	49.116	2014.44	98941.6	205082367		2	7.212	1866.85	13463	27905642		-147.595
	11	139.119	1100.14	153050	317235160		2	6.561	714.665	4689.13	9719448		-385.471			11	77.454	1199.17	92880	192518005		2	9.267	944.374	8751.39	18139541		-254.794		11	72.112	2313.25	166812	345761994		2	5.189	2212.65	11481.9	23799307		-100.599
	12	119.72	1037.81	124247	257533360		2	11.942	660.953	7892.81	16359901		-376.86			12	128.918	1238.9	159717	331054766		2	10.88	2573.24	27997.3	58031817			1334.34	13	75.262	1522.78	114608	237555149		2	13.817	1698.26	23465.4	48638087		175.477
	13	135.424	1031.67	139713	289591539		2	8.709	788.936	6870.96	14241864		-242.733			13	106.092	1203.23	127653	264594676		2	5.637	1122.85	6329.41	13119358		-80.386		14	50.388	3079.16	155152	321593973		2	6.999	2204.35	15429	31980683			-874.815
	14	197.19	1022.63	201653	417977602		2	4.379	852.443	3732.59	7736772		-170.19			14	125.345	1076.46	134929	279675674		2	5.674	994.222	5640.81	11692050		-82.24		15	142.68	1548.99	221010	458100206		2	8.667	976.193	8460.37	17536323		-572.793
																15	93.148	1069.96	99664.2	206580178		2	7.534	785.114	5914.98	12260336		-284.845
0												mean	-307.221														mean	-248.887													mean	-235.796
0												sd	116.244														sd	174.272													sd	357.77
0												sem	29.061														sem	43.5679													sem	86.772

## Sheet: CCDC16
0h	1h															3h														16h
	BG	tout le noyau sans LD et sans nucléole					LD	cercle de taille différente dans le LD en évitant les gros spot					Difference			BG	tout le noyau sans LD et sans nucléole					LD	cercle de taille différente dans le LD en évitant les gros spot					Difference		BG	tout le noyau sans LD et sans nucléole					LD	cercle de taille différente dans le LD en évitant les gros spot					Difference
	Paste	Area	Mean	IntDen	RawIntDen		Paste	Area	Mean	IntDen	RawIntDen					Paste	Area	Mean	IntDen	RawIntDen		Paste	Area	Mean	IntDen	RawIntDen				Paste	Area	Mean	IntDen	RawIntDen		Paste	Area	Mean	IntDen	RawIntDen
880	1	87.548	1955.43	171195	354845957		2	9.978	1372.27	13691.9	28380001		-583.156			1	113.345	1673.34	189664	393128872		2	4.016	1556.81	6251.98	12958851		-116.531		1	76.15	2872.8	218762	453442035		2	3.433	3130.09	10745.9	22273759		257.3
	1	90.97	2256.89	205310	425558188		2	6.52	2277.39	14849.2	30778949		20.507			1	98.603	1412.79	139305	288745832		2	3.788	1425.19	5398.87	11190572		12.398		1	46.766	4055.74	189669	393138925		2	4.512	2384.29	10757.6	22297891			-1671.45
	1	93.306	2072.16	193345	400757109		2	5.529	1561.1	8631.11	17890241		-511.053			1	89.255	2000.05	178515	370018887		2	3.254	1672.32	5441.12	11278147		-327.725		1	99.42	2367.73	235399	487926893		2	4.207	1939.38	8158.87	16911392		-428.347
	1	93.79	1913.31	179449	371955183		2	4.613	1443.75	6659.58	13803726		-469.557			1	83.64	2324.55	194425	402996181		2	3.433	1648.68	5660.1	11732038		-675.869		1	76.13	3759.49	286210	593244194		2	3.479	3312.51	11525.6	23889836		-446.981
	1	112.833	2226.87	251264	520810875		2	3.767	1841.77	6938.77	14382406		-385.095			1	100.988	2065.82	208624	432427106		2	6.544	2263.95	14815.1	30708158		198.129		1	65.739	2769.32	182052	377350176		2	7.997	3420.2	27351.6	56693277		650.884
	2	91.422	2350.28	214869	445371515		2	4.568	2592.79	11843.4	24548507		242.504			1	106.773	2164.05	231062	478935687		2	4.873	2468.04	12026.1	24927236		303.998		1	142.053	3445.98	489512	1014641596		2	4.846	3267.38	15832.8	32817551		-178.602
	3	70.408	3028.79	213251	442019037		2	2.63	2774.84	7298.69	15128450		-253.949			2	35.383	2488.55	88052.8	182512506		2	6.133	2175.7	13343.3	27657435		-312.852		2	81.5	3835.16	312565	647873537		2	4.085	3119.31	12743.5	26414316		-715.85
	4	69.95	2285.91	159900	331434324		2	3.36	2312	7767.77	16100738		26.084			3	104.317	2016.73	210379	436066264		2	6.702	2063.05	13826.9	28659933		46.319		3	64.239	4094.71	263042	545222612		2	3.688	4839.78	17848.3	36995262		745.07
	5	84.826	2472.47	209729	434718622		2	4.601	1821.26	8378.95	17367574		-651.201			4	75.257	2512.87	189111	391981989		2	4.415	2720.18	12010.6	24895039		207.309		4	18.239	6564.78	119735	248181604		2	4.327	8703.88	37658.1	78056347			2139.09
	6	78.977	2810.5	221966	460081570		2	3.439	1746.45	6005.87	12448728		-1064.04			5	85.023	2977.1	253123	524663689		2	3.109	3032.2	9426.78	19539470		55.094		5	57.883	4320.56	250086	518367619		2	6.397	4641.3	29691.6	61543650		320.743
	7	69.21	2798.84	193708	401510305		2	4.045	1975.23	7989.52	16560360		-823.605			6	82.12	2804.96	230343	477446819		2	7.411	2603.15	19292.9	39989570		-201.814		6	61.75	5214.56	321997	667421999		2	4.88	5992.81	29247.6	60623211		778.245
	8	98.264	2086.16	204993	424902045		2	6.353	2136.01	13569.8	28126936		49.851			7	67.971	2805.54	190694	395263547		2	4.583	3098.2	14199.8	29432853		292.659		7	91.809	4531.88	416069	862412673		2	4.085	5317.3	21723.1	45026867		785.415
	9	54.368	2519.61	136986	283939328		2	5.61	2628.08	14743.3	30559294		108.473			8	51.014	3561.84	181704	376628603		2	3.08	3207.91	9880.2	20479301		-353.926		8	71.868	4580.2	329171	682293707		2	2.926	3828.37	11200.1	23215211		-751.832
	10	84.522	2147.58	181517	376240921		2	3.026	1611.63	4876.67	10108172		-535.945			9	56.865	4112.44	233853	484720855		2	3.225	3798.23	12248.1	25387371		-314.209		9	89.644	3260.58	292291	605848929		2	3.815	3193.94	12185.5	25257688		-66.642
	11	98.602	2132.11	210231	435758891		2	7.086	1597.41	11319.5	23462725		-534.704			10	54.355	3014.27	163839	339599293		2	6.206	2421.06	15025.6	31144522		-593.206		10	37.651	4393.03	165403	342840956		2	2.993	6400.76	19158.2	39710338			2007.73
	12	113.086	1976.22	223483	463227638		2	4.415	1663.91	7346.78	15228118		-312.308			11	58.369	3693.42	215583	446852185		2	4.755	3082.62	14657.9	30382342		-610.797		11	70.384	4047.92	284909	590547336		2	4.884	3652.43	17839.6	36977147		-395.497
	13	150.001	1883.4	282511	585577884		2	3.827	1869.04	7152.4	14825210		-14.358			12	62.465	2689.19	167980	348183284		2	6.007	2494	14982.6	31055297		-195.192		12	71.41	4089.36	292022	605291266		2	3.213	3547.07	11397.1	23623465		-542.297
	14	153.832	1471.15	226309	469085158		2	3.794	1332.89	5056.97	10481882		-138.252			13	33.709	3985.25	134339	278453642		2	2.85	3762.04	10723	22226146		-223.211		13	62.101	4317.62	268129	555768037		2	4.379	3854.41	16877.3	34982576		-463.212
	15	68.3	2502.63	170930	354297074		2	2.671	2560.87	6840.89	14179526		58.24			14	44.138	3395.26	149861	310625635		2	2.991	3084.17	9225.31	19121863		-311.09		14	75.415	4009.62	302385	626771196		2	4.253	4717.69	20065.6	41591173		708.076
																15	58.579	3242.84	189964	393749064		2	3.987	3661.78	14599.4	30260987		418.942		15	94.082	3651.05	343497	711987841		2	4.381	3759.74	16470	34138474		108.693
0												mean	-303.767														mean	-135.079													mean	21.4804
0												sd	356.171														sd	318.406													sd	561.144
0												sem	81.7112														sem	71.1977													sem	136.097

## Sheet: PRP19
0h	1h															3h														16h
	BG	tout le noyau sans LD et sans nucléole					LD	cercle de taille différente dans le LD en évitant les gros spot					Difference			BG	tout le noyau sans LD et sans nucléole					LD	cercle de taille différente dans le LD en évitant les gros spot					Difference		BG	tout le noyau sans LD et sans nucléole					LD	cercle de taille différente dans le LD en évitant les gros spot					Difference
	Paste	Area	Mean	IntDen	RawIntDen		Paste	Area	Mean	IntDen	RawIntDen					Paste	Area	Mean	IntDen	RawIntDen		Paste	Area	Mean	IntDen	RawIntDen				Paste	Area	Mean	IntDen	RawIntDen		Paste	Area	Mean	IntDen	RawIntDen
880	1	96.18	2627.25	252689	523763195		2	5.684	2046.25	11631.3	24108933		-580.998			1	105.283	1983.88	208868	432934314		2	4.913	1604.8	7884.76	16343233		-379.086		1	153.76	2170.01	333662	691600782		2	6.193	1575.81	9758.52	20227085		-594.205
	1	62.185	2661.4	165498	343038385		2	2.993	1970.08	5896.66	12222364		-691.321			1	142.843	1582.49	226048	468542743		2	5.305	857.715	4550.18	9431432		-724.772		1	91.046	2493.37	227012	470541800		2	3.557	2146.72	7635.04	15825611		-346.654
	1	110.026	2173.22	239110	495617615		2	5.171	1359.58	7030.2	14571927		-813.643			1	100.955	1840.6	185817	385155156		2	4.757	937.89	4461.48	9247592		-902.712		1	116.293	2945.18	342504	709928102		2	3.418	3815.33	13039.5	27027807			870.146
	1	81.749	2704.89	221123	458335093		2	6.976	1673.93	11677.7	24205020		-1030.96			1	124.518	1751.46	218088	452044804		2	5.645	1894.89	10696	22170263		143.434		1	125.565	2560.79	321546	666487967		2	2.34	2467.7	5774.11	11968346		-93.086
	1	60.018	2728.58	163763	339440921		2	2.657	3009.82	7998.08	16578107		281.242			1	133.343	1604.37	213933	443431419		2	5.545	1134.38	6290.41	13038514		-469.998		1	58.067	2634.79	152995	317121201		2	3.288	3884.38	12773.3	26475903			1249.58
	1	87.221	2087.2	182048	377342581		2	3.277	13316.2	43634.5	90443857			11229		1	83.721	1434.07	120062	248859747		2	5.012	519.45	2603.31	5396042		-914.619		1	85.902	1557.48	133790	277315144		2	8.864	1294.84	11476.9	23788872		-262.634
	2	67.436	1635.68	110304	228634479		2	3.765	1370.82	5161.17	10697874		-264.866			2	106.956	1311.69	140294	290795385		2	5.012	519.45	2603.31	5396042		-792.241		2	134.961	1411.31	190471	394801908		2	7.806	887	6923.93	14351663		-524.312
	3	88.646	1407.44	124764	258606737		2	4.56	840.353	3832.09	7943015		-567.092			3	117.699	1009.66	118835	246316740		2	6.374	1020.34	6503.76	13480740		10.685		3	105.242	1623.15	170824	354076369		2	7.277	1647.53	11989.5	24851339		24.376
	4	71.106	1596.44	113517	235293332		2	6.007	12064.6	72477.6	150228743			10468.2		4	105.341	1270.01	133785	277303450		2	3.189	1099.86	3507.42	7270050		-170.157		4	78.942	1662.54	131245	272038779		2	6.916	1555.67	10759.6	22302105		-106.873
	5	101.724	1299.4	132180	273978440		2	2.762	849.397	2345.64	4861947		-450.003			5	97.394	1371.05	133531	276778701		2	2.738	1587	4345.81	9007822		215.955		5	88.89	1630.95	144975	300499323		2	11.264	1249.4	14073.5	29170971		-381.551
	6	77.907	1752.86	136559	283055082		2	1.887	1348.28	2544.65	5274457		-404.582			6	74.464	1874.33	139570	289294872		2	8.047	1355.48	10907.8	22609348		-518.851		6	80.166	1483.11	118895	246441118		2	8.112	1384.61	11231.8	23280809		-98.502
	7	83.575	1779.75	148743	308308372		2	7.171	832.421	5969.39	12373111		-947.332			7	82.022	1476.17	121078	250965034		2	6.054	1128.6	6832.28	14161693		-347.567		7	120.521	1682.65	202794	420344179		2	4.338	1523.27	6608.22	13697262		-159.377
	8	69.388	1264.47	87739.2	181862474		2	5.158	1522.18	7851.94	16275206		257.714			8	70.373	1682.88	118430	245476226		2	4.742	1620.76	7684.85	15928848		-62.115		8	83.464	1821.32	152015	315090079		2	8.105	1833.84	14863.5	30808491		12.52
	9	48.421	1791.71	86756.2	179824798		2	4.539	2109.01	9572.52	19841558		317.301			9	97.078	1492.15	144855	300249410		2	4.228	1075.94	4549.28	9429569		-416.208		9	106.337	1404.57	149358	309583582		2	4.753	1216.06	5780.02	11980597		-188.517
	10	74.291	1653.53	122843	254624444		2	3.86	879.217	3393.41	7033738		-774.317			10	70.388	1884.78	132666	274985348		2	4.923	1422.93	7004.95	14519583		-461.847		10	82.495	1662.06	137112	284199860		2	8.275	1973.25	16328.6	33845251		311.198
	11	85.595	1577.93	135063	279952439		2	3.723	1140.81	4246.74	8802470		-437.119			11	55.901	1846.21	103205	213920191		2	3.3	1836.54	6060.49	12561955		-9.666		11	74.369	1350.86	100463	208235107		2	6.403	1182.58	7572.13	15695219		-168.279
	12	66.896	1493.68	99920.9	207112216		2	4.88	884.392	4316.23	8946505		-609.288			12	72.404	1543.69	111770	231672566		2	3.323	1113.57	3700.51	7670269		-430.121		12	141.84	1365.61	193699	401491942		2	3.642	1171.81	4267.18	8844838		-193.802
	13	115.251	1359.87	156726	324855242		2	2.381	611.093	1455.23	3016353		-748.777			13	64.28	1646.02	105807	219312270		2	6.388	2202.4	14068.1	29159809		556.383		13	124.601	1528.6	190466	394790787		2	5.369	1207.94	6485.06	13441987		-320.66
	14	76.345	1439.1	109868	227729902		2	9.551	1038.24	9915.74	20552952		-400.859			14	53.183	1776.82	94496	195867553		2	6.619	1925.91	12748	26423516		149.094		14	129.176	1615.15	208640	432459953		2	4.844	1112.76	5389.98	11172132		-502.389
	15	44.766	2180.97	97634.2	202372369		2	4.151	2454.23	10187.5	21116219		273.261			15	43.907	2009.4	88226.8	182873118		2	5.932	1929.79	11447.9	23728663		-79.609		15	107.515	1420.09	152680	316469608		2	3.987	917.157	3656.66	7579389		-502.932
0												mean	-421.758														mean	-280.201													mean	-227.538
0												sd	433.726														sd	397.268													sd	229.212
0												sem	102.23														sem	88.8318													sem	54.0258
