# Supplementary material for: XAB2 dynamics during DNA damage-dependent transcription inhibition
Source: eLife. 2022 Jul 26;11:e77094. doi: 10.7554/eLife.77094 (PMC9436415; doi:10.7554/eLife.77094)
Supplement: Figure 3—source data 2. [file elife-77094-fig3-data2.xlsx]

## Sheet: MRC5
No UV			1h														3h														16h
			BG						LD						Difference		BG						LD						Difference		BG						LD						Difference
			Paste	Area	Mean	IntDen	RawIntDen		Paste	Area	Mean	IntDen	RawIntDen				Paste	Area	Mean	IntDen	RawIntDen		Paste	Area	Mean	IntDen	RawIntDen				Paste	Area	Mean	IntDen	RawIntDen		Paste	Area	Mean	IntDen	RawIntDen
			1	3.183	801.102	2550.24	532733		2	3.183	685.898	2183.5	456122		-115.204		1	3.183	1177.16	3747.4	782813		2	3.183	669.368	2130.88	445130		-507.794		1	3.183	1679.06	5345.16	1116577		2	3.183	1507.97	4800.5	1002801		-171.092
			1	3.183	929.302	2958.36	617986		2	3.183	725.663	2310.09	482566		-203.639		1	3.183	1177.16	3747.4	782813		3	3.183	909.159	2894.23	604591		-268.003		3	3.183	1721.63	5480.68	1144887		4	3.183	1786.8	5688.13	1188223		65.167
			3	3.183	1380.43	4394.48	917986		4	3.183	870.842	2772.25	579110		-509.588		4	3.183	1123.44	3576.38	747087		5	3.183	725.94	2310.97	482750		-397.499		5	3.183	1930.96	6147.05	1284088		6	3.183	1493.78	4755.32	993362		-437.182
			5	3.183	844.624	2688.79	561675		6	3.183	656.023	2088.39	436255		-188.601		6	3.183	1076.61	3427.29	715944		7	3.183	879.689	2800.42	584993		-196.919		7	3.183	1659.55	5283.04	1103600		8	3.183	1285.74	4093.04	855016		-373.811
			7	3.183	1079.21	3435.58	717675		8	3.183	553.023	1760.5	367760		-526.188		8	3.183	801.442	2551.32	532959		9	3.183	570.848	1817.25	379614		-230.594		9	3.183	2021.07	6433.89	1344008		10	3.183	2266.65	7215.68	1507320		245.582
			9	3.183	1099.2	3499.22	730969		10	3.183	554.911	1766.51	369016		-544.291		10	3.183	658.574	2096.52	437952		11	3.183	433.901	1381.29	288544		-224.673		11	3.183	1394.5	4439.27	927342		12	3.183	1227.98	3909.16	816604		-166.523
			11	3.183	1048.35	3337.33	697152		12	3.183	628.202	1999.83	417754		-420.147		12	3.183	891.116	2836.79	592592		13	3.183	580.099	1846.7	385766		-311.017		13	3.183	1107.66	3526.13	736591		14	3.183	1129.96	3597.15	751427		22.309
			13	3.183	1100.71	3504.01	731971		14	3.183	865.513	2755.29	575566		-235.195		14	3.183	990.021	3151.65	658364		15	3.183	737.167	2346.71	490216		-252.854		15	3.183	1667.81	5309.32	1109091		16	3.183	1631.43	5193.53	1084902		-36.374
																	16	3.183	784.997	2498.97	522023		17	3.183	647.853	2062.39	430822		-137.144
																	18	3.183	719.311	2289.87	478342		19	3.183	421.102	1340.54	280033		-298.209
mean	0													mean	-342.857													mean	-282.471													mean	-106.491
sd	0													sd	175.072													sd	105.736													sd	227.885
sem	0													sem	61.8974													sem	33.4368													sem	80.5696

## Sheet: CSA
No UV			1h														3h														16h
			BG						LD						Difference		BG						LD						Difference		BG						LD						Difference
			Paste	Area	Mean	IntDen	RawIntDen		Paste	Area	Mean	IntDen	RawIntDen				Paste	Area	Mean	IntDen	RawIntDen		Paste	Area	Mean	IntDen	RawIntDen				Paste	Area	Mean	IntDen	RawIntDen		Paste	Area	Mean	IntDen	RawIntDen
			1	3.183	1782.98	5675.97	1185681		2	3.183	1072.63	3414.62	713297		-710.352		1	3.183	1230.53	3917.28	818301		2	3.183	899.893	2864.74	598429		-330.635		1	3.183	2909.41	9261.88	1934760		2	3.183	1462.29	4655.08	972424
			3	3.183	1278.71	4070.67	850342		4	3.183	1317.34	4193.63	876028		38.625		3	3.183	1549.29	4932.05	1030280		4	3.183	874.402	2783.58	581477		-674.891		4	3.183	2263.08	7204.32	1504947		3	3.183	1832.06	5832.21	1218320		-431.018
			5	3.183	1549.94	4934.1	1030710		6	3.183	1403.61	4468.28	933402		-146.328		5	3.183	1164.37	3706.69	774309		6	3.183	704.716	2243.4	468636		-459.658		5	3.183	3201.8	10192.7	2129198		6	3.183	2007.91	6392	1335258		-1193.9
			7	3.183	1754.78	5586.19	1166927		8	3.183	965.734	3074.33	642213		-789.043		7	3.183	1206.94	3842.18	802613		8	3.183	1089.03	3466.85	724207		-117.904		7	3.183	2529.88	8053.67	1682371		8	3.183	1838.91	5854.03	1222878		-690.967
			9	3.183	1419.21	4517.94	943775		10	3.183	1094.99	3485.82	728171		-324.217		9	3.183	1507.36	4798.57	1002397		10	3.183	821.185	2614.17	546088		-686.179		9	3.183	2665.26	8484.65	1772401		10	3.183	1517.79	4831.77	1009333		-1147.47
			11	3.183	1924.79	6127.4	1279983		12	3.183	820.756	2612.81	545803		-1104.03		11	3.183	928.632	2956.22	617540		12	3.183	600.561	1911.84	399373		-328.071		13	3.183	2571.83	8187.21	1710268		12	3.183	2059.2	6555.28	1369366		-512.635
			13	3.183	1285.95	4093.72	855159		14	3.183	1046.29	3330.79	695785		-239.66		13	3.183	1055.41	3359.8	701846		14	3.183	655.355	2086.27	435811		-400.053		14	3.183	2443.06	7777.29	1624637		15	3.183	1720.93	5478.43	1144417		-722.135
			15	3.183	1644.14	5233.97	1093351		16	3.183	1051.68	3347.93	699367		-592.457		15	3.183	768.444	2446.28	511015		16	3.183	543.871	1731.37	361674		-224.573		1	3.183	3015.14	9598.44	2005067		2	3.183	2003.42	6377.71	1332272		-1011.72
			17	3.183	1221.06	3887.14	812005		18	3.183	748.317	2382.21	497631		-472.743		17	3.183	830.525	2643.91	552299		18	3.183	416.4	1325.58	276906		-414.125		3	3.183	3426.29	10907.3	2278482		4	3.183	2027.09	6453.07	1348014
mean	0													mean	-482.245													mean	-404.01													mean	-815.692
sd	0													sd	355.84													sd	187.555													sd	304.321
sem	0													sem	118.613													sem	62.5184													sem	115.023

## Sheet: CSB
No UV			1h														3h														16h
			BG						LD						Difference		BG						LD						Difference		BG						LD						Difference
			Paste	Area	Mean	IntDen	RawIntDen		Paste	Area	Mean	IntDen	RawIntDen				Paste	Area	Mean	IntDen	RawIntDen		Paste	Area	Mean	IntDen	RawIntDen				Paste	Area	Mean	IntDen	RawIntDen		Paste	Area	Mean	IntDen	RawIntDen
			1	3.183	1358.75	4325.46	903568		2	3.183	881.934	2807.56	586486		-476.815		1	3.183	1082.59	3446.33	719922		2	3.183	658.657	2096.78	438007		-423.932		1	3.183	1161.88	3698.74	772649		2	3.183	705.263	2245.15	469000		-456.615
			3	3.183	1240.35	3948.54	824831		4	3.183	919.335	2926.63	611358		-321.012		3	3.183	880.054	2801.58	585236		4	3.183	539.311	1716.85	358642		-340.743		1	3.183	1379.12	4390.32	917116		2	3.183	843.096	2683.93	560659		-536.026
			1	3.183	1186.04	3775.66	788717		2	3.183	837.865	2667.27	557180		-348.176		5	3.183	856.671	2727.14	569686		6	3.183	562.854	1791.8	374298		-293.817		3	3.183	1328.85	4230.29	883687		4	3.183	839.884	2673.7	558523		-488.969
			3	3.183	1258.89	4007.58	837164		4	3.183	745.409	2372.95	495697		-513.484		7	3.183	1169.54	3723.14	777746		8	3.183	521.05	1658.72	346498		-648.493		5	3.183	1218.4	3878.69	810239		6	3.183	1104.11	3514.83	734231		-114.298
			5	3.183	1246.61	3968.47	828993		6	3.183	718.395	2286.95	477733		-528.211		7	3.183	1169.54	3723.14	777746		9	3.183	619.983	1973.67	412289		-549.56		7	3.183	1408.32	4483.26	936531		8	3.183	844.842	2689.48	561820		-563.475
			7	3.183	1328.02	4227.64	883134		8	3.183	822.465	2618.25	546939		-505.556		10	3.183	1167.18	3715.61	776172		11	3.183	688.48	2191.72	457839		-478.696		9	3.183	1524.19	4852.14	1013587		10	3.183	676.026	2152.07	449557		-848.165
			9	3.183	887.356	2824.82	590092		10	3.183	591.059	1881.59	393054		-296.297		12	3.183	1098.84	3498.06	730728		13	3.183	436.451	1389.41	290240		-662.388		11	3.183	1289.47	4104.92	857497		12	3.183	934.002	2973.32	621111		-355.467
			11	3.183	1246.51	3968.15	828926		12	3.183	761.134	2423.01	506154		-485.371		1	3.183	1007.89	3208.53	670246		2	3.183	629.684	2004.55	418740		-378.205		13	3.183	1370.92	4364.23	911665		14	3.183	841.896	2680.11	559861		-529.029
			13	3.183	802.57	2554.91	533709		15	3.183	732.814	2332.85	487321		-69.756		3	3.183	1079.29	3435.84	717730		4	3.183	567.051	1805.16	377089		-512.242		15	3.183	1237.77	3940.33	823116		16	3.183	751.959	2393.8	500053		-485.809
			16	3.183	1286.79	4096.39	855715		17	3.183	692.577	2204.76	460564		-594.212		5	3.183	1373.91	4373.72	913649		6	3.183	913.747	2908.84	607642		-460.161
			18	3.183	1203.81	3832.23	800534		19	3.183	1056.42	3363.04	702522		-147.387		5	3.183	1373.91	4373.72	913649		7	3.183	820.023	2610.47	545315		-553.885
																	8	3.183	827.119	2633.06	550034		9	3.183	595.576	1895.97	396058		-231.543
																	10	3.183	953.415	3035.12	634021		11	3.183	550.779	1753.36	366268		-402.636
mean	0													mean	-389.662													mean	-456.639													mean	-486.428
sd	0													sd	168.15													sd	129.606													sd	192.87
sem	0													sem	50.6991													sem	35.9461													sem	64.2901
