# Supplementary material for: XAB2 dynamics during DNA damage-dependent transcription inhibition
Source: eLife. 2022 Jul 26;11:e77094. doi: 10.7554/eLife.77094 (PMC9436415; doi:10.7554/eLife.77094)
Supplement: Figure 4—figure supplement 1—source data 1. [file elife-77094-fig4-figsupp1-data1.xlsx]

## Sheet: MRC5 XAB2-GFP NT
																average pre bleach																0
background	12																230.395	289.008	226.653	243.993	261.349	172.163	236.206	245.116	294.215	186.997	269.839	256.819	233.138	208.082
temps	1	2	3	4	5	6	7	8	9	10	11	12	13	14		temps	1	2	3	4	5	6	7	8	9	10	11	12	13	14		temps	1	2	3	4	5	6	7	8	9	10	11	12	13	14	moyenne	variance	ecart
0	261.853	322.4	261.311	275.728	291.422	195.816	265.755	277.055	321.57	216.651	305.358	287.827	258.148	238.441		0	249.853	310.4	249.311	263.728	279.422	183.816	253.755	265.055	309.57	204.651	293.358	275.827	246.148	226.441		0	1.08445	1.07402	1.09997	1.08088	1.06915	1.06769	1.0743	1.08135	1.05219	1.09441	1.08716	1.07401	1.0558	1.08823	1.0774	0.000183481	0.0135455
0.0384092	256.945	319.265	246.505	274.083	288.505	195.469	260.301	275.483	323.106	214.236	309.427	291.69	255.969	233.815		0.0384092	244.945	307.265	234.505	262.083	276.505	183.469	248.301	263.483	311.106	202.236	297.427	279.69	243.969	221.815		0.0384092	1.06315	1.06317	1.03464	1.07414	1.05799	1.06567	1.05121	1.07493	1.05741	1.08149	1.10224	1.08906	1.04646	1.066	1.06625	0.000305245	0.0174713
0.0605261	254.753	323.809	258.444	272.216	290.925	202.638	262.129	272.844	326.792	211.196	304.226	280.428	265.878	233.371		0.0605261	242.753	311.809	246.444	260.216	278.925	190.638	250.129	260.844	314.792	199.196	292.226	268.428	253.878	221.371		0.0605261	1.05364	1.0789	1.08732	1.06649	1.06725	1.10731	1.05894	1.06417	1.06994	1.06523	1.08296	1.0452	1.08896	1.06386	1.07144	0.000260667	0.0161452
0.0989368	260.04	314.904	251.806	267.671	285.662	194.414	261.488	275.351	326.098	214.304	300.914	279.845	258.689	236.091		0.0989368	248.04	302.904	239.806	255.671	273.662	182.414	249.488	263.351	314.098	202.304	288.914	267.845	246.689	224.091		0.0989368	1.07658	1.04808	1.05803	1.04786	1.04712	1.05954	1.05623	1.0744	1.06758	1.08185	1.07069	1.04293	1.05812	1.07694	1.06185	0.000164515	0.0128264
0.121054	255.028	314.968	249.33	262.134	280.08	192.667	260.233	272.649	317.433	210.885	299.415	275.679	254.989	229.761		0.121054	243.028	302.968	237.33	250.134	268.08	180.667	248.233	260.649	305.433	198.885	287.415	263.679	242.989	217.761		0.121054	1.05483	1.0483	1.04711	1.02517	1.02576	1.04939	1.05092	1.06337	1.03813	1.06357	1.06513	1.02671	1.04225	1.04651	1.04623	0.000183706	0.0135538
0.159464	252.252	309.002	242.301	262.342	285.401	186.386	257.764	270.046	316.933	208.745	301.665	280.891	260.137	232.307		0.159464	240.252	297.002	230.301	250.342	273.401	174.386	245.764	258.046	304.933	196.745	289.665	268.891	248.137	220.307		0.159464	1.04278	1.02766	1.01609	1.02602	1.04612	1.01291	1.04046	1.05275	1.03643	1.05213	1.07347	1.04701	1.06434	1.05875	1.04264	0.00031051	0.0176213
0.181581	253.647	307.691	246.487	266.392	281.597	188.897	258.364	272.929	320.546	210.955	299.705	284.109	249.789	229.667		0.181581	241.647	295.691	234.487	254.392	269.597	176.897	246.364	260.929	308.546	198.955	287.705	272.109	237.789	217.667		0.181581	1.04884	1.02313	1.03456	1.04262	1.03156	1.0275	1.043	1.06451	1.04871	1.06394	1.06621	1.05954	1.01995	1.04606	1.0443	0.00024116	0.0155293
0.219992	251.792	308.137	253.151	261.233	285.453	191.379	250.058	266.62	319.733	205.666	291.536	286.177	251.142	230.718		0.219992	239.792	296.137	241.151	249.233	273.453	179.379	238.058	254.62	307.733	193.666	279.536	274.177	239.142	218.718		0.219992	1.04078	1.02467	1.06396	1.02148	1.04632	1.04191	1.00784	1.03878	1.04595	1.03566	1.03594	1.06759	1.02575	1.05111	1.03912	0.000259999	0.0161245
0.242109	257.066	312.079	249.343	263.631	279.042	193.545	260.416	265.547	313.231	203.045	291.104	277.823	252.386	226.168		0.242109	245.066	300.079	237.343	251.631	267.042	181.545	248.416	253.547	301.231	191.045	279.104	265.823	240.386	214.168		0.242109	1.06368	1.03831	1.04716	1.0313	1.02178	1.05449	1.05169	1.0344	1.02385	1.02164	1.03433	1.03506	1.03109	1.02925	1.037	0.000163382	0.0127821
0.28052	247.449	313.868	249.709	263.814	279.323	187.908	256.514	266.285	319.593	210.17	292.176	273.202	259.571	225.755		0.28052	235.449	301.868	237.709	251.814	267.323	175.908	244.514	254.285	307.593	198.17	280.176	261.202	247.571	213.755		0.28052	1.02193	1.0445	1.04878	1.03205	1.02286	1.02175	1.03517	1.03741	1.04547	1.05975	1.03831	1.01707	1.06191	1.02726	1.03673	0.000198819	0.0141003
0.302637	253.21	312.023	239.495	261.542	276.437	192.658	260.061	264.555	315.288	208.3	295.415	279.388	254.652	230.069		0.302637	241.21	300.023	227.495	249.542	264.437	180.658	248.061	252.555	303.288	196.3	283.415	267.388	242.652	218.069		0.302637	1.04694	1.03811	1.00371	1.02274	1.01182	1.04934	1.05019	1.03035	1.03084	1.04975	1.05031	1.04115	1.04081	1.04799	1.03672	0.000226553	0.0150517
0.341047	247.427	314.221	247.461	261.096	275.165	191.862	254.461	264.994	315.87	206.505	298.271	273.413	252.663	220.128		0.341047	235.427	302.221	235.461	249.096	263.165	179.862	242.461	252.994	303.87	194.505	286.271	261.413	240.663	208.128		0.341047	1.02184	1.04572	1.03886	1.02091	1.00695	1.04472	1.02648	1.03214	1.03282	1.04015	1.06089	1.01789	1.03228	1.00022	1.03013	0.000257192	0.0160372
0.363164	247.09	309.407	242.006	261.917	278.557	180.81	251.969	266.863	310.155	204.515	291.311	275.114	252.896	222.841		0.363164	235.09	297.407	230.006	249.917	266.557	168.81	239.969	254.863	298.155	192.515	279.311	263.114	240.896	210.841		0.363164	1.02038	1.02906	1.01479	1.02428	1.01993	0.980524	1.01593	1.03977	1.01339	1.02951	1.0351	1.02451	1.03328	1.01326	1.02098	0.000206469	0.014369
0.401575	247.587	310.601	243.5	263.506	284.414	187.954	252.101	265.268	313.95	205.168	287.414	278.844	250.929	223.793		0.401575	235.587	298.601	231.5	251.506	272.414	175.954	240.101	253.268	301.95	193.168	275.414	266.844	238.929	211.793		0.401575	1.02253	1.03319	1.02138	1.03079	1.04234	1.02202	1.01649	1.03326	1.02629	1.033	1.02066	1.03904	1.02484	1.01783	1.0274	6.32265e-05	0.00795151
0.427378	248.068	304.105	238.34	265.397	274.004	184.246	258.424	261.262	310.735	206.334	283.716	277.907	247.752	225.242		0.427378	236.068	292.105	226.34	253.397	262.004	172.246	246.424	249.262	298.735	194.334	271.716	265.907	235.752	213.242		0.427378	1.02462	1.01072	0.998617	1.03854	1.00251	1.00048	1.04326	1.01692	1.01536	1.03923	1.00696	1.03539	1.01121	1.0248	1.01919	0.000233483	0.0152802
0.465789	247.083	300.714	250.249	266.366	276.016	186.024	250.698	258.34	313.755	206.045	285.706	280.802	246.931	223.031		0.465789	235.083	288.714	238.249	254.366	264.016	174.024	238.698	246.34	301.755	194.045	273.706	268.802	234.931	211.031		0.465789	1.02035	0.998984	1.05116	1.04251	1.01021	1.01081	1.01055	1.005	1.02563	1.03769	1.01433	1.04666	1.00769	1.01417	1.02112	0.000282281	0.0168012
0.487906	245.999	301.448	237.705	263.264	278.862	183.969	253.211	260.616	306.984	207.197	289.438	280.099	248.051	231.286		0.487906	233.999	289.448	225.705	251.264	266.862	171.969	241.211	248.616	294.984	195.197	277.438	268.099	236.051	219.286		0.487906	1.01564	1.00152	0.995816	1.0298	1.0211	0.998873	1.02119	1.01428	1.00261	1.04385	1.02816	1.04392	1.01249	1.05384	1.02022	0.000325688	0.0180468
0.526317	243.964	306.149	242.626	258.739	275.208	183.206	255.363	257.451	312.999	200.067	291.618	276.6	249.816	228.948		0.526317	231.964	294.149	230.626	246.739	263.208	171.206	243.363	245.451	300.999	188.067	279.618	264.6	237.816	216.948		0.526317	1.00681	1.01779	1.01753	1.01125	1.00711	0.994441	1.0303	1.00137	1.02306	1.00572	1.03624	1.0303	1.02007	1.04261	1.01747	0.000195278	0.0139742
0.553963	242.302	302.491	240.121	265.691	280.508	189.199	253.92	265.19	311.248	197.419	286.985	280.876	248.686	230.638		0.553963	230.302	290.491	228.121	253.691	268.508	177.199	241.92	253.19	299.248	185.419	274.985	268.876	236.686	218.638		0.553963	0.999595	1.00513	1.00648	1.03975	1.02739	1.02925	1.02419	1.03294	1.01711	0.991559	1.01907	1.04695	1.01522	1.05073	1.02181	0.000307778	0.0175436
0.592374	244.259	309.522	238.638	260.801	276.156	185.502	254.124	265.778	310.196	201.559	286.211	272.782	250.267	223.093		0.592374	232.259	297.522	226.638	248.801	264.156	173.502	242.124	253.778	298.196	189.559	274.211	260.782	238.267	211.093		0.592374	1.00809	1.02946	0.999932	1.01971	1.01074	1.00778	1.02505	1.03534	1.01353	1.0137	1.0162	1.01543	1.022	1.01447	1.01653	8.56238e-05	0.00925331
0.614491	241.454	302.623	242.076	257.357	278.985	190.046	253.077	262.204	315.759	202.937	283.115	273.437	254.605	217.552		0.614491	229.454	290.623	230.076	245.357	266.985	178.046	241.077	250.204	303.759	190.937	271.115	261.437	242.605	205.552		0.614491	0.995914	1.00559	1.0151	1.00559	1.02157	1.03417	1.02062	1.02076	1.03244	1.02107	1.00473	1.01798	1.04061	0.987841	1.016	0.000219343	0.0148102
0.652901	243.066	305.066	237.796	259.548	266.416	186.765	247.84	260.341	310.888	193.362	288.251	271.99	246.614	223.432		0.652901	231.066	293.066	225.796	247.548	254.416	174.765	235.84	248.341	298.888	181.362	276.251	259.99	234.614	211.432		0.652901	1.00291	1.01404	0.996217	1.01457	0.973474	1.01511	0.99845	1.01316	1.01588	0.969863	1.02376	1.01235	1.00633	1.0161	1.00516	0.000257237	0.0160386
0.678705	246.984	301.448	247.865	257.334	274.965	187.801	245.755	265.846	308.598	204.223	288.552	269.026	246.501	216.825		0.678705	234.984	289.448	235.865	245.334	262.965	175.801	233.755	253.846	296.598	192.223	276.552	257.026	234.501	204.825		0.678705	1.01992	1.00152	1.04064	1.0055	1.00619	1.02113	0.989623	1.03562	1.0081	1.02794	1.02488	1.00081	1.00585	0.984347	1.01229	0.000274824	0.0165778
0.717115	245.466	302.693	239.906	256.626	277.344	188.39	253.297	256.654	316.205	202.627	285.375	268.321	248.544	221.158		0.717115	233.466	290.693	227.906	244.626	265.344	176.39	241.297	244.654	304.205	190.627	273.375	256.321	236.544	209.158		0.717115	1.01333	1.00583	1.00553	1.00259	1.01529	1.02455	1.02155	0.998117	1.03395	1.01941	1.0131	0.998062	1.01461	1.00517	1.01222	0.000108284	0.010406
0.739232	245.914	302.32	236.663	262.369	277.956	186.301	252.366	263.717	307.291	203.113	275.832	276.471	247.133	219.766		0.739232	233.914	290.32	224.663	250.369	265.956	174.301	240.366	251.717	295.291	191.113	263.832	264.471	235.133	207.766		0.739232	1.01527	1.00454	0.991218	1.02613	1.01763	1.01242	1.01761	1.02693	1.00366	1.02201	0.977738	1.0298	1.00856	0.998481	1.01086	0.000216994	0.0147307
0.777643	237.561	298.049	240.547	257.016	273.298	187.071	252.132	256.478	309.788	197.845	280.877	266.191	248.636	219.945		0.777643	225.561	286.049	228.547	245.016	261.298	175.071	240.132	244.478	297.788	185.845	268.877	254.191	236.636	207.945		0.777643	0.979017	0.989763	1.00835	1.00419	0.999807	1.01689	1.01662	0.997399	1.01214	0.993837	0.996434	0.989768	1.015	0.999341	1.00133	0.00013112	0.0114508
0.803446	242.631	304.498	241.601	253.266	271.735	185.541	248.801	258.885	305.235	198.236	284.88	271.867	243.065	218.061		0.803446	230.631	292.498	229.601	241.266	259.735	173.541	236.801	246.885	293.235	186.236	272.88	259.867	231.065	206.061		0.803446	1.00102	1.01208	1.01301	0.988823	0.993826	1.008	1.00252	1.00722	0.996668	0.995928	1.01127	1.01187	0.991108	0.990287	1.00169	7.92833e-05	0.00890412
0.841857	239.173	295.637	242.975	261.484	276.791	180.078	250.551	252.817	308.369	205.065	284.605	270.318	245.038	221.829		0.841857	227.173	283.637	230.975	249.484	264.791	168.078	238.551	240.817	296.369	193.065	272.605	258.318	233.038	209.829		0.841857	0.986014	0.981417	1.01907	1.0225	1.01317	0.976272	1.00993	0.982463	1.00732	1.03245	1.01025	1.00584	0.999571	1.0084	1.0039	0.000281258	0.0167707
0.863974	239.506	302.52	247.481	255.809	281.114	187.821	249.398	258.919	308.643	202.61	280.905	263.586	244.198	221.647		0.863974	227.506	290.52	235.481	243.809	269.114	175.821	237.398	246.919	296.643	190.61	268.905	251.586	232.198	209.647		0.863974	0.987459	1.00523	1.03895	0.999246	1.02971	1.02125	1.00505	1.00736	1.00825	1.01932	0.996538	0.979624	0.995968	1.00752	1.00725	0.000255528	0.0159853
0.902385	242.212	295.089	238.353	256.533	282.876	186.23	252.344	261.648	309.225	196.026	282.689	269.369	249.048	221.874		0.902385	230.212	283.089	226.353	244.533	270.876	174.23	240.344	249.648	297.225	184.026	270.689	257.369	237.048	209.874		0.902385	0.999204	0.979521	0.998675	1.00221	1.03646	1.01201	1.01752	1.01849	1.01023	0.98411	1.00315	1.00214	1.01677	1.00861	1.00636	0.000208357	0.0144346
0.928188	242.372	297.987	239.964	255.853	273.725	185.669	248.107	251.123	314.264	196.278	284.797	270.883	244.789	223.106		0.928188	230.372	285.987	227.964	243.853	261.725	173.669	236.107	239.123	302.264	184.278	272.797	258.883	232.789	211.106		0.928188	0.999899	0.989549	1.00578	0.999426	1.00144	1.00875	0.999581	0.975552	1.02736	0.985457	1.01096	1.00804	0.998503	1.01453	1.00177	0.000164118	0.0128108
0.952553	240.399	297.766	233.985	252.15	274.258	185.417	245.888	258.664	310.149	194.149	284.572	270.617	239.375	222.149		0.952553	228.399	285.766	221.985	240.15	262.258	173.417	233.888	246.664	298.149	182.149	272.572	258.617	227.375	210.149		0.952553	0.991335	0.988784	0.979403	0.984249	1.00348	1.00728	0.990186	1.00632	1.01337	0.974072	1.01013	1.007	0.97528	1.00993	0.995773	0.000195137	0.0139691
0.990964	239.921	298.931	241.092	259.88	271.526	185.81	247.692	258.854	308.701	202.983	285.403	276.492	248.782	219.179		0.990964	227.921	286.931	229.092	247.88	259.526	173.81	235.692	246.854	296.701	190.983	273.403	264.492	236.782	207.179		0.990964	0.989261	0.992815	1.01076	1.01593	0.993026	1.00957	0.997824	1.00709	1.00845	1.02131	1.01321	1.02988	1.01563	0.99566	1.00717	0.000143646	0.0119853
1.01308	240.767	308.912	239.383	255.33	274.926	185.297	247.039	257.698	308.231	203.931	278.019	267.387	253.002	211.128		1.01308	228.767	296.912	227.383	243.33	262.926	173.297	235.039	245.698	296.231	191.931	266.019	255.387	241.002	199.128		1.01308	0.992932	1.02735	1.00322	0.997282	1.00604	1.00659	0.995059	1.00238	1.00685	1.02638	0.985843	0.994425	1.03373	0.956968	1.0025	0.000369377	0.0192192
1.05149	246.515	292.75	238.105	254.414	276.123	182.779	248.105	256.573	307.225	195.882	279.172	266.366	240.73	215.164		1.05149	234.515	280.75	226.105	242.414	264.123	170.779	236.105	244.573	295.225	183.882	267.172	254.366	228.73	203.164		1.05149	1.01788	0.971428	0.997581	0.993528	1.01062	0.991961	0.999572	0.997786	1.00343	0.98334	0.990116	0.990449	0.981092	0.976365	0.993225	0.00016292	0.012764
1.0773	241.801	301.676	237.661	252.189	271.579	182.473	249.945	257.948	305.189	198.816	282.678	269.928	246.064	221.467		1.0773	229.801	289.676	225.661	240.189	259.579	170.473	237.945	245.948	293.189	186.816	270.678	257.928	234.064	209.467		1.0773	0.99742	1.00231	0.995622	0.984409	0.993229	0.990184	1.00736	1.0034	0.996512	0.99903	1.00311	1.00432	1.00397	1.00666	0.999109	4.40445e-05	0.0066366
1.11571	240.094	298.63	243.274	254.188	271.262	181.563	243.363	254.658	302.656	196.251	285.615	259.599	243.155	220.99		1.11571	228.094	286.63	231.274	242.188	259.262	169.563	231.363	242.658	290.656	184.251	273.615	247.599	231.155	208.99		1.11571	0.990011	0.991774	1.02039	0.992602	0.992016	0.984898	0.979496	0.989974	0.987903	0.985313	1.01399	0.9641	0.991494	1.00436	0.992023	0.000192134	0.0138612
1.13782	235.278	300.551	237.939	250.509	270.587	182.144	246.565	253.559	306.996	196.328	280.84	264.867	240.542	227.019		1.13782	223.278	288.551	225.939	238.509	258.587	170.144	234.565	241.559	294.996	184.328	268.84	252.867	228.542	215.019		1.13782	0.969108	0.99842	0.996848	0.977524	0.989434	0.988273	0.993052	0.98549	1.00265	0.985725	0.996297	0.984612	0.980286	1.03334	0.991504	0.000225444	0.0150148
1.17623	244.874	295.874	237.023	258.522	274.505	184.577	247.993	251.711	306.606	200.901	281.035	261.076	243.946	219.785		1.17623	232.874	283.874	225.023	246.522	262.505	172.577	235.993	239.711	294.606	188.901	269.035	249.076	231.946	207.785		1.17623	1.01076	0.982237	0.992807	1.01036	1.00443	1.0024	0.999098	0.977951	1.00133	1.01018	0.99702	0.969851	0.994887	0.998572	0.996563	0.000152985	0.0123687
1.20388	238.526	308.36	232.678	250.303	268.997	183.025	248.756	251.255	305.286	195.46	280.403	263.131	244.321	221.755		1.20388	226.526	296.36	220.678	238.303	256.997	171.025	236.756	239.255	293.286	183.46	268.403	251.131	232.321	209.755		1.20388	0.983206	1.02544	0.973637	0.976679	0.98335	0.99339	1.00233	0.97609	0.996842	0.981083	0.994678	0.977853	0.996495	1.00804	0.990651	0.000215847	0.0146917
1.24229	244.011	300.075	236.788	253.42	267.91	179.114	246.444	254.194	306.858	196.469	281.631	264.722	246.764	220.618		1.24229	232.011	288.075	224.788	241.42	255.91	167.114	234.444	242.194	294.858	184.469	269.631	252.722	234.764	208.618		1.24229	1.00701	0.996773	0.99177	0.989454	0.979191	0.970673	0.99254	0.988081	1.00218	0.986479	0.999229	0.984048	1.00697	1.00258	0.992642	0.000113021	0.0106311
1.26441	237.306	295.281	237.416	256.674	267.948	185.587	250.053	256.03	302.86	208.465	278.24	268.08	243.496	218.23		1.26441	225.306	283.281	225.416	244.674	255.948	173.587	238.053	244.03	290.86	196.465	266.24	256.08	231.496	206.23		1.26441	0.97791	0.980186	0.994541	1.00279	0.979336	1.00827	1.00782	0.995571	0.988596	1.05063	0.986662	0.997123	0.992957	0.991099	0.996678	0.000334478	0.0182887
1.30282	242.019	301.711	244.514	254.61	273.055	179.467	246.345	254.507	307.582	195.65	279.086	272.252	240.665	218.95		1.30282	230.019	289.711	232.514	242.61	261.055	167.467	234.345	242.507	295.582	183.65	267.086	260.252	228.665	206.95		1.30282	0.998367	1.00243	1.02586	0.994331	0.998877	0.972723	0.992121	0.989358	1.00465	0.982099	0.989797	1.01337	0.980814	0.994559	0.995668	0.000183827	0.0135583
1.32862	239.084	302.209	241.015	262.426	269.913	180.587	251.327	253.144	304.717	200.459	278.569	272.713	247.199	220.409		1.32862	227.084	290.209	229.015	250.426	257.913	168.587	239.327	241.144	292.717	188.459	266.569	260.713	235.199	208.409		1.32862	0.985628	1.00416	1.01042	1.02637	0.986855	0.979229	1.01321	0.983797	0.994908	1.00782	0.987881	1.01516	1.00884	1.00157	1.00042	0.000200837	0.0141717
1.36703	240.066	299.606	237.536	248.163	271.675	183.714	243.012	254.325	306.833	199.433	277.207	265.638	242.717	220.516		1.36703	228.066	287.606	225.536	236.163	259.675	171.714	231.012	242.325	294.833	187.433	265.207	253.638	230.717	208.516		1.36703	0.98989	0.995151	0.99507	0.967909	0.993597	0.997392	0.97801	0.988615	1.0021	1.00233	0.982834	0.987615	0.989615	1.00209	0.990872	9.57328e-05	0.00978431
1.38915	241.945	295.48	233.604	257.423	273.089	177.94	246.295	262.425	305.925	191.433	280.478	267.203	241.936	218.183		1.38915	229.945	283.48	221.604	245.423	261.089	165.94	234.295	250.425	293.925	179.433	268.478	255.203	229.936	206.183		1.38915	0.998045	0.980874	0.977722	1.00586	0.999007	0.963854	0.991909	1.02166	0.999013	0.959548	0.994956	0.993708	0.986265	0.990873	0.990235	0.000260148	0.0161291
1.42756	239.252	301.627	233.294	251.704	272.889	187.168	251.228	256.507	310.859	196.489	281.892	262.617	243.369	217.527		1.42756	227.252	289.627	221.294	239.704	260.889	175.168	239.228	244.507	298.859	184.489	269.892	250.617	231.369	205.527		1.42756	0.986357	1.00214	0.976354	0.982421	0.998242	1.01745	1.01279	0.997517	1.01578	0.986586	1.0002	0.975851	0.992412	0.987721	0.995131	0.000186549	0.0136583
1.45336	240.956	306.207	232.054	259.468	270.675	185.153	246.198	261.935	299.353	200.474	283.242	261.598	251.799	214.968		1.45336	228.956	294.207	220.054	247.468	258.675	173.153	234.198	249.935	287.353	188.474	271.242	249.598	239.799	202.968		1.45336	0.993753	1.01799	0.970883	1.01424	0.98977	1.00575	0.991499	1.01966	0.976676	1.0079	1.0052	0.971884	1.02857	0.975423	0.9978	0.000368181	0.019188
1.49177	239.573	296.841	239.339	257.183	269.272	188.38	248.295	259.194	308.513	196.634	275.002	267.141	246.536	214.751		1.49177	227.573	284.841	227.339	245.183	257.272	176.38	236.295	247.194	296.513	184.634	263.002	255.141	234.536	202.751		1.49177	0.98775	0.985583	1.00303	1.00488	0.984402	1.02449	1.00038	1.00848	1.00781	0.987361	0.974662	0.993467	1.006	0.97438	0.995904	0.000205314	0.0143288
1.51389	246.155	304.453	234.756	252.865	269.507	182.466	250.15	252.154	293.675	203.275	277.417	260.722	244.26	218.832		1.51389	234.155	292.453	222.756	240.865	257.507	170.466	238.15	240.154	281.675	191.275	265.417	248.722	232.26	206.832		1.51389	1.01632	1.01192	0.982805	0.98718	0.985301	0.990143	1.00823	0.979758	0.957377	1.02287	0.983612	0.968473	0.996234	0.993992	0.99173	0.000334955	0.0183018
1.5523	239.343	308.16	236.046	254.28	268.951	180.952	239.675	251.935	301.223	197.676	278.55	263.754	249.188	221.955		1.5523	227.343	296.16	224.046	242.28	256.951	168.952	227.675	239.935	289.223	185.676	266.55	251.754	237.188	209.955		1.5523	0.986752	1.02475	0.988496	0.992979	0.983174	0.981349	0.963883	0.978865	0.983032	0.992933	0.987811	0.980279	1.01737	1.009	0.990762	0.000262709	0.0162083
1.5781	239.958	305.866	235.999	255.648	270.765	180.006	242.391	258.207	302.436	197.855	276.539	264.237	247.593	215.057		1.5781	227.958	293.866	223.999	243.648	258.765	168.006	230.391	246.207	290.436	185.855	264.539	252.237	235.593	203.057		1.5781	0.989421	1.01681	0.988289	0.998586	0.990115	0.975854	0.975381	1.00445	0.987155	0.993891	0.980358	0.982159	1.01053	0.97585	0.990632	0.000170175	0.0130451
1.61652	248.685	298.847	238.526	254.188	274.174	180.739	242.103	256.939	302.491	194.039	275.514	266.881	249.906	218.008		1.61652	236.685	286.847	226.526	242.188	262.174	168.739	230.103	244.939	290.491	182.039	263.514	254.881	237.906	206.008		1.61652	1.0273	0.992524	0.999438	0.992602	1.00316	0.980112	0.974162	0.999279	0.987342	0.973484	0.976559	0.992455	1.02045	0.990032	0.993493	0.000255719	0.0159912
1.63863	243.801	303.338	236.879	253.911	270.988	181.041	247.494	253.887	302.918	199.551	278.189	262.938	244.592	213.765		1.63863	231.801	291.338	224.879	241.911	258.988	169.041	235.494	241.887	290.918	187.551	266.189	250.938	232.592	201.765		1.63863	1.0061	1.00806	0.992171	0.991467	0.990968	0.981866	0.996985	0.986828	0.988793	1.00296	0.986473	0.977101	0.997658	0.969641	0.99122	0.000116838	0.0108092
1.67704	243.552	305.482	234.157	257.779	269.665	182.597	239.174	259.414	309.469	198.553	276.671	269.264	243.309	216.418		1.67704	231.552	293.482	222.157	245.779	257.665	170.597	227.174	247.414	297.469	186.553	264.671	257.264	231.309	204.418		1.67704	1.00502	1.01548	0.980162	1.00732	0.985906	0.990904	0.961762	1.00938	1.01106	0.997623	0.980847	1.00173	0.992155	0.982391	0.99441	0.00022888	0.0151288
1.70285	239.006	295.864	242.317	253.977	268.345	183.028	248.606	256.596	298.715	196.788	279.51	265.353	242.675	218.027		1.70285	227.006	283.864	230.317	241.977	256.345	171.028	236.606	244.596	286.715	184.788	267.51	253.353	230.675	206.027		1.70285	0.985289	0.982203	1.01616	0.991737	0.980855	0.993407	1.00169	0.99788	0.974508	0.988185	0.991368	0.986505	0.989435	0.990124	0.990668	0.00010124	0.0100618
1.74126	241.166	301.809	239.116	258.076	270.132	188.072	248.785	255.063	302.148	193.559	273.594	262.746	247.704	218.642		1.74126	229.166	289.809	227.116	246.076	258.132	176.072	236.785	243.063	290.148	181.559	261.594	250.746	235.704	206.642		1.74126	0.994664	1.00277	1.00204	1.00854	0.987693	1.02271	1.00245	0.991626	0.986176	0.970917	0.969444	0.976354	1.01101	0.993079	0.994248	0.000237833	0.0154218
1.76337	240.998	303.597	239.234	250.519	271.197	187.21	248.533	262.23	302.474	195.763	273.772	267.156	246.187	213.954		1.76337	228.998	291.597	227.234	238.519	259.197	175.21	236.533	250.23	290.474	183.763	261.772	255.156	234.187	201.954		1.76337	0.993935	1.00896	1.00256	0.977565	0.991768	1.0177	1.00138	1.02087	0.987284	0.982703	0.970104	0.993525	1.0045	0.97055	0.994529	0.000254638	0.0159574
1.80178	234.665	297.656	230.847	250.493	272.81	178.981	249.48	257.077	305.448	194.194	279.172	268.815	242.841	216.34		1.80178	222.665	285.656	218.847	238.493	260.81	166.981	237.48	245.077	293.448	182.194	267.172	256.815	230.841	204.34		1.80178	0.966448	0.988403	0.965558	0.977458	0.997939	0.9699	1.00539	0.999842	0.997392	0.974313	0.990116	0.999985	0.990147	0.982016	0.986065	0.00018156	0.0134744
1.82759	243.421	300.955	237.33	249.975	269.674	182.005	245.55	251.015	308.999	198.578	289.938	264.75	239.935	212.415		1.82759	231.421	288.955	225.33	237.975	257.674	170.005	233.55	239.015	296.999	186.578	277.938	252.75	227.935	200.415		1.82759	1.00445	0.999818	0.994161	0.975335	0.98594	0.987465	0.988755	0.975111	1.00946	0.997757	1.03001	0.984157	0.977682	0.963153	0.990947	0.000285985	0.0169111
1.866	241.837	300.376	240.533	252.349	263.472	181.056	237.827	256.744	297.945	198.084	284.678	265.716	238.17	212.425		1.866	229.837	288.376	228.533	240.349	251.472	169.056	225.827	244.744	285.945	186.084	272.678	253.716	226.17	200.425		1.866	0.997577	0.997815	1.00829	0.985065	0.962209	0.981953	0.956059	0.998484	0.97189	0.995115	1.01052	0.987918	0.970112	0.963202	0.984729	0.000310987	0.0176348
1.88812	240.755	304.016	235.317	255.328	267.275	184.751	239.414	247.873	302.086	197.316	276.866	266.237	241.113	220.302		1.88812	228.755	292.016	223.317	243.328	255.275	172.751	227.414	235.873	290.086	185.316	264.866	254.237	229.113	208.302		1.88812	0.99288	1.01041	0.98528	0.997274	0.976761	1.00342	0.962778	0.962293	0.985965	0.991008	0.98157	0.989947	0.982735	1.00106	0.987384	0.000194737	0.0139548
1.92653	238.302	292.567	236.497	256.081	267.102	181.687	243.735	255.351	306.032	196.255	277.743	262.577	234.295	222.763		1.92653	226.302	280.567	224.497	244.081	255.102	169.687	231.735	243.351	294.032	184.255	265.743	250.577	222.295	210.763		1.92653	0.982233	0.970795	0.990486	1.00036	0.976099	0.985618	0.981071	0.992801	0.999377	0.985334	0.98482	0.975696	0.953491	1.01288	0.985076	0.000207312	0.0143983
1.95233	240.004	296.572	235.787	255.601	264.045	178.878	242.64	259.948	304.125	197.672	276.915	264.832	241.267	211.635		1.95233	228.004	284.572	223.787	243.601	252.045	166.878	230.64	247.948	292.125	185.672	264.915	252.832	229.267	199.635		1.95233	0.989621	0.984653	0.987354	0.998393	0.964402	0.969302	0.976436	1.01156	0.992895	0.992912	0.981751	0.984476	0.983396	0.959405	0.984039	0.000187396	0.0136893
1.99074	239.087	299.259	235.802	253.396	272.13	183.291	243.489	253.724	293.707	194.354	272.932	261.134	244.876	212.48		1.99074	227.087	287.259	223.802	241.396	260.13	171.291	231.489	241.724	281.707	182.354	260.932	249.134	232.876	200.48		1.99074	0.985641	0.99395	0.98742	0.989356	0.995338	0.994935	0.98003	0.986163	0.957486	0.975168	0.966991	0.970077	0.998876	0.963466	0.981778	0.000172971	0.0131518
2.01286	239.234	301.438	234.558	247.167	268.855	173.7	247.733	257.204	303.175	190.413	278.436	268.923	237.216	215.577		2.01286	227.234	289.438	222.558	235.167	256.855	161.7	235.733	245.204	291.175	178.413	266.436	256.923	225.216	203.577		2.01286	0.986279	1.00149	0.981931	0.963827	0.982806	0.939226	0.997997	1.00036	0.989667	0.954093	0.987388	1.00041	0.96602	0.978349	0.980703	0.000354016	0.0188153
2.05127	237.685	301.045	241.195	251.015	276.215	183.306	240.607	249.491	301.873	197.998	278.64	269.223	241.682	219.585		2.05127	225.685	289.045	229.195	239.015	264.215	171.306	228.607	237.491	289.873	185.998	266.64	257.223	229.682	207.585		2.05127	0.979555	1.00013	1.01121	0.979597	1.01097	0.995022	0.967829	0.968894	0.985241	0.994655	0.988144	1.00157	0.985176	0.997611	0.990401	0.000187117	0.0136791
2.07891	238.711	291.309	236.394	252.815	274.317	177.156	239.835	256.42	300.954	192.011	274.654	261.693	243.143	220.473		2.07891	226.711	279.309	224.394	240.815	262.317	165.156	227.835	244.42	288.954	180.011	262.654	249.693	231.143	208.473		2.07891	0.984009	0.966442	0.990032	0.986975	1.00371	0.9593	0.96456	0.997162	0.982118	0.962639	0.973372	0.972254	0.991443	1.00188	0.981135	0.000221072	0.0148685
2.11733	241.622	290.466	235.333	249.834	271.536	178.062	243.829	250.163	309.132	200.368	275.132	259.125	236.566	213.773		2.11733	229.622	278.466	223.333	237.834	259.536	166.062	231.829	238.163	297.132	188.368	263.132	247.125	224.566	201.773		2.11733	0.996643	0.963525	0.98535	0.974757	0.993065	0.964562	0.981469	0.971635	1.00991	1.00733	0.975144	0.962254	0.963232	0.96968	0.979897	0.000265647	0.0162987
2.13944	236.685	300.439	234.064	251.531	268.847	181.93	244.753	250.505	303.092	195.312	270.596	264.134	240.117	217.825		2.13944	224.685	288.439	222.064	239.531	256.847	169.93	232.753	238.505	291.092	183.312	258.596	252.134	228.117	205.825		2.13944	0.975215	0.998033	0.979752	0.981712	0.982776	0.98703	0.985381	0.973031	0.989384	0.980291	0.958334	0.981758	0.978463	0.989153	0.981451	8.48503e-05	0.00921142
2.17785	239.137	296.11	231.101	251.933	268.255	182.2	242.906	253.328	308.529	195.617	274.799	268.611	243.205	217.47		2.17785	227.137	284.11	219.101	239.933	256.255	170.2	230.906	241.328	296.529	183.617	262.799	256.611	231.205	205.47		2.17785	0.985858	0.983054	0.966679	0.98336	0.980511	0.988598	0.977562	0.984548	1.00786	0.981922	0.97391	0.999191	0.991709	0.987447	0.985158	0.000102982	0.010148
2.20366	242.405	297.249	237.813	250.542	268.379	183.344	246.89	249.451	302.213	191.639	276.261	270.089	240.196	214.165		2.20366	230.405	285.249	225.813	238.542	256.379	171.344	234.89	237.451	290.213	179.639	264.261	258.089	228.196	202.165		2.20366	1.00004	0.986995	0.996292	0.977659	0.980985	0.995243	0.994428	0.968731	0.986397	0.960649	0.979328	1.00495	0.978802	0.971564	0.984433	0.00016351	0.0127871
2.24207	238.096	294.374	237.24	255.799	270.774	182.433	247.312	249.933	304.38	195.218	283.755	266.784	229.705	218.768		2.24207	226.096	282.374	225.24	243.799	258.774	170.433	235.312	237.933	292.38	183.218	271.755	254.784	217.705	206.768		2.24207	0.981339	0.977047	0.993764	0.999205	0.990149	0.989951	0.996215	0.970697	0.993762	0.979789	1.0071	0.992077	0.933803	0.993685	0.985613	0.000313102	0.0176947
2.26418	238.376	293.481	236.085	255.577	268.576	178.4	245.037	248.757	297.555	191.648	274.296	267.812	236.902	219.785		2.26418	226.376	281.481	224.085	243.577	256.576	166.4	233.037	236.757	285.555	179.648	262.296	255.812	224.902	207.785		2.26418	0.982555	0.973957	0.988668	0.998295	0.981739	0.966526	0.986583	0.965899	0.970565	0.960698	0.972046	0.99608	0.964673	0.998572	0.979061	0.000171581	0.0130989
2.30259	239.772	299.553	237.121	251.989	276.553	182.522	245.627	249.687	301.936	194.966	275.445	264.207	244.018	219.818		2.30259	227.772	287.553	225.121	239.989	264.553	170.522	233.627	237.687	289.936	182.966	263.445	252.207	232.018	207.818		2.30259	0.988614	0.994967	0.993239	0.983589	1.01226	0.990468	0.989081	0.969693	0.985455	0.978441	0.976304	0.982043	0.995196	0.998731	0.988434	0.000112404	0.0106021
2.3284	238.258	297.347	231.124	250.752	270.036	186.311	244.702	255.125	292.841	194.737	275.031	261.342	240.21	220.945		2.3284	226.258	285.347	219.124	238.752	258.036	174.311	232.702	243.125	280.841	182.737	263.031	249.342	228.21	208.945		2.3284	0.982042	0.987334	0.96678	0.97852	0.987325	1.01248	0.985165	0.991879	0.954543	0.977217	0.97477	0.970887	0.978862	1.00415	0.982282	0.000214522	0.0146466
2.36681	236.942	303.07	231.722	250.24	268.939	185.229	247.849	257.267	299.755	193.772	275.82	268.821	240.582	219.565		2.36681	224.942	291.07	219.722	238.24	256.939	173.229	235.849	245.267	287.755	181.772	263.82	256.821	228.582	207.565		2.36681	0.976331	1.00714	0.969419	0.976421	0.983128	1.00619	0.998488	1.00062	0.978042	0.972056	0.977693	1.00001	0.980458	0.997515	0.987393	0.000180897	0.0134498
2.38893	238.733	297.306	231.657	251.848	273.042	179.911	249.336	253.311	298.447	197.44	279.989	258.586	242.491	217.943		2.38893	226.733	285.306	219.657	239.848	261.042	167.911	237.336	241.311	286.447	185.44	267.989	246.586	230.491	205.943		2.38893	0.984104	0.987192	0.969132	0.983011	0.998827	0.975302	1.00478	0.984478	0.973597	0.991671	0.993143	0.960155	0.988646	0.98972	0.984555	0.000140705	0.0118619
2.42734	237.064	298.45	240.708	251.03	269.528	180.506	242.148	253.269	299.229	195.43	278.904	268.46	244.06	214.369		2.42734	225.064	286.45	228.708	239.03	257.528	168.506	230.148	241.269	287.229	183.43	266.904	256.46	232.06	202.369		2.42734	0.97686	0.991151	1.00907	0.979659	0.985381	0.978758	0.974353	0.984307	0.976255	0.980922	0.989123	0.998603	0.995376	0.972544	0.985168	0.000109404	0.0104596
2.45314	243.241	293.712	233.559	249.049	274.498	180.587	245.752	254.444	293.982	188.051	275.092	265.173	242.241	218.52		2.45314	231.241	281.712	221.559	237.049	262.498	168.587	233.752	242.444	281.982	176.051	263.092	253.173	230.241	206.52		2.45314	1.00367	0.974757	0.977524	0.97154	1.0044	0.979229	0.989611	0.989101	0.958421	0.941462	0.974996	0.985804	0.987574	0.992493	0.980756	0.000280889	0.0167597
2.49155	237.305	292.105	235.411	249.307	268.241	182.331	242.615	250.986	299.297	194.017	273.239	267.28	237.186	215.478		2.49155	225.305	280.105	223.411	237.307	256.241	170.331	230.615	238.986	287.297	182.017	261.239	255.28	225.186	203.478		2.49155	0.977906	0.969196	0.985695	0.972597	0.980457	0.989359	0.97633	0.974993	0.976486	0.973366	0.968129	0.994008	0.965891	0.977874	0.977306	6.38594e-05	0.00799121
2.51367	236.371	290.436	236.908	253.169	268.134	181.675	241.639	248.767	298.32	196.67	273.846	265.984	239.073	217.46		2.51367	224.371	278.436	224.908	241.169	256.134	169.675	229.639	236.767	286.32	184.67	261.846	253.984	227.073	205.46		2.51367	0.973852	0.963421	0.992299	0.988426	0.980048	0.985548	0.972198	0.96594	0.973165	0.987554	0.970378	0.988962	0.973985	0.987399	0.978798	9.01251e-05	0.00949342
2.55208	237.536	291.129	235.053	251.818	268.044	181.499	244.812	252.825	304.175	195.4	274.924	268.049	242.484	218.914		2.55208	225.536	279.129	223.053	239.818	256.044	169.499	232.812	240.825	292.175	183.4	262.924	256.049	230.484	206.914		2.55208	0.978909	0.965819	0.984115	0.982889	0.979703	0.984526	0.985631	0.982496	0.993065	0.980762	0.974373	0.997002	0.988616	0.994386	0.983735	6.64605e-05	0.00815233
2.57788	242.128	292.104	231.802	248.773	274.294	179.283	245.18	251.88	299.303	192.252	277.1	259.656	238.225	217.992		2.57788	230.128	280.104	219.802	236.773	262.294	167.283	233.18	239.88	287.303	180.252	265.1	247.656	226.225	205.992		2.57788	0.99884	0.969193	0.969772	0.970409	1.00362	0.971655	0.987189	0.97864	0.976506	0.963928	0.982437	0.964322	0.970348	0.989955	0.978344	0.000155804	0.0124821
2.61629	240.671	294.058	237.549	254.371	269.116	185.76	243.75	257.807	296.946	191.664	277.126	268.931	239.609	216.387		2.61629	228.671	282.058	225.549	242.371	257.116	173.76	231.75	245.807	284.946	179.664	265.126	256.931	227.609	204.387		2.61629	0.992516	0.975954	0.995127	0.993352	0.983805	1.00928	0.981135	1.00282	0.968495	0.960783	0.982533	1.00044	0.976284	0.982242	0.986054	0.000185013	0.0136019
2.63841	238.463	293.048	229.342	253.708	267.917	183.559	247.279	248.114	295.564	193.294	271.139	265.659	238.959	213.792		2.63841	226.463	281.048	217.342	241.708	255.917	171.559	235.279	236.114	283.564	181.294	259.139	253.659	226.959	201.792		2.63841	0.982932	0.972459	0.958918	0.990635	0.979217	0.996492	0.996075	0.963276	0.963798	0.9695	0.960346	0.987696	0.973496	0.969771	0.976044	0.000167674	0.0129489
2.67682	234.964	292.149	235.273	248.536	268.451	179.799	252.912	249.811	298.992	196.954	277.884	257.788	243.415	214.769		2.67682	222.964	280.149	223.273	236.536	256.451	167.799	240.912	237.811	286.992	184.954	265.884	245.788	231.415	202.769		2.67682	0.967745	0.969348	0.985086	0.969437	0.981261	0.974652	1.01992	0.970199	0.975449	0.989072	0.985342	0.957048	0.992609	0.974466	0.979403	0.00022801	0.0151
2.70262	241.07	296.045	230.185	249.539	272.994	179.537	243.602	251.79	300.202	195.386	281.372	267.819	238.261	215.314		2.70262	229.07	284.045	218.185	237.539	260.994	167.537	231.602	239.79	288.202	183.386	269.372	255.819	226.261	203.314		2.70262	0.994248	0.982829	0.962637	0.973548	0.998643	0.97313	0.980508	0.978273	0.979562	0.980687	0.998269	0.996107	0.970502	0.977085	0.981859	0.000122789	0.011081
2.74103	238.371	297.853	232.462	247.937	268.44	183.22	240.308	255.097	305.612	196.51	270.262	264.562	239.883	219.605		2.74103	226.371	285.853	220.462	235.937	256.44	171.22	228.308	243.097	293.612	184.51	258.262	252.562	227.883	207.605		2.74103	0.982533	0.989085	0.972684	0.966982	0.981218	0.994522	0.966563	0.991765	0.99795	0.986698	0.957096	0.983425	0.977459	0.997707	0.981835	0.000155349	0.0124639
2.76315	238.356	295.105	233.784	250.619	274.359	181.109	247.042	247.963	304.378	194.605	277.017	267.191	245.78	216.83		2.76315	226.356	283.105	221.784	238.619	262.359	169.109	235.042	235.963	292.378	182.605	265.017	255.191	233.78	204.83		2.76315	0.982468	0.979577	0.978516	0.977974	1.00387	0.982261	0.995072	0.96266	0.993755	0.976511	0.982129	0.993662	1.00275	0.984371	0.985398	0.000125887	0.0112199
2.80156	239.677	296.564	236.543	253.856	272.242	182.482	244.952	252.606	306.138	197.795	275.761	269.901	242.106	216.711		2.80156	227.677	284.564	224.543	241.856	260.242	170.482	232.952	240.606	294.138	185.795	263.761	257.901	230.106	204.711		2.80156	0.988201	0.984625	0.990689	0.991241	0.995766	0.990236	0.986224	0.981602	0.999737	0.99357	0.977475	1.00421	0.986995	0.983799	0.989598	5.10711e-05	0.0071464
2.82736	243.052	290.722	235.612	245.894	271.929	178.615	246.486	252.751	302.94	193.829	274.994	259.844	241.177	216.153		2.82736	231.052	278.722	223.612	233.894	259.929	166.615	234.486	240.751	290.94	181.829	262.994	247.844	229.177	204.153		2.82736	1.00285	0.964411	0.986581	0.958609	0.994568	0.967775	0.992718	0.982194	0.988868	0.972361	0.974632	0.965054	0.98301	0.981118	0.979625	0.000168602	0.0129847
2.86578	230.285	299.352	236.034	256.974	269.032	183.379	243.754	250.149	295.703	192.069	276.238	262.125	244.137	215.202		2.86578	218.285	287.352	224.034	244.974	257.032	171.379	231.754	238.149	283.703	180.069	264.238	250.125	232.137	203.202		2.86578	0.947437	0.994272	0.988443	1.00402	0.983484	0.995446	0.981152	0.971578	0.96427	0.962949	0.979243	0.973936	0.995706	0.976547	0.979892	0.000236095	0.0153654
2.88789	240.35	297.627	235.61	253.2	272.632	186.83	242.399	252.641	298.569	196.644	276.198	259.335	243.5	219.228		2.88789	228.35	285.627	223.61	241.2	260.632	174.83	230.399	240.641	286.569	184.644	264.198	247.335	231.5	207.228		2.88789	0.991123	0.988303	0.986573	0.988553	0.997258	1.01549	0.975415	0.981745	0.974011	0.987415	0.979094	0.963072	0.992974	0.995895	0.986923	0.000155287	0.0124614
2.9263	235.427	302.082	231.235	251.791	269.704	181.257	244.474	249.556	304.37	197.676	275.91	265.618	238.793	214.623		2.9263	223.427	290.082	219.235	239.791	257.704	169.257	232.474	237.556	292.37	185.676	263.91	253.618	226.793	202.623		2.9263	0.969755	1.00372	0.96727	0.982778	0.986055	0.98312	0.9842	0.969159	0.993728	0.992933	0.978027	0.987537	0.972784	0.973765	0.981773	0.000114014	0.0106777
2.95395	248.871	295.78	238.279	254.421	275.267	184.304	236.459	248.927	304.746	196.901	282.649	260.677	239.428	218.12		2.95395	236.871	283.78	226.279	242.421	263.267	172.304	224.459	236.927	292.746	184.901	270.649	248.677	227.428	206.12		2.95395	1.02811	0.981912	0.998348	0.993557	1.00734	1.00082	0.950268	0.966593	0.995006	0.988789	1.003	0.968297	0.975508	0.990571	0.989151	0.000385462	0.0196332
2.99236	236.082	295.592	232.102	256.675	271.624	179.504	243.113	254.779	297.696	194.544	279.109	265.01	240.03	212.434		2.99236	224.082	283.592	220.102	244.675	259.624	167.504	231.113	242.779	285.696	182.544	267.109	253.01	228.03	200.434		2.99236	0.972598	0.981262	0.971095	1.00279	0.993401	0.972938	0.978438	0.990467	0.971044	0.976184	0.989882	0.985169	0.97809	0.963245	0.980472	0.000115166	0.0107316
3.01448	237.309	294.944	235.117	255.25	266.781	181.547	249.165	250.899	302.113	199.593	275.366	268.474	246.732	217.038		3.01448	225.309	282.944	223.117	243.25	254.781	169.547	237.165	238.899	290.113	187.593	263.366	256.474	234.732	205.038		3.01448	0.977923	0.97902	0.984397	0.996955	0.974871	0.984805	1.00406	0.974638	0.986057	1.00318	0.976011	0.998657	1.00684	0.985371	0.988056	0.000134443	0.011595
3.05289	242.757	297.019	231.143	254.107	268.445	181.664	249.058	251.005	299.019	197.597	276.353	265.208	244.949	220.66		3.05289	230.757	285.019	219.143	242.107	256.445	169.664	237.058	239.005	287.019	185.597	264.353	253.208	232.949	208.66		3.05289	1.00157	0.986199	0.966864	0.99227	0.981238	0.985485	1.00361	0.97507	0.975541	0.992511	0.979669	0.98594	0.999189	1.00278	0.987709	0.000131289	0.0114581
3.07869	237.252	295.651	236.621	254.462	270.494	180.135	242.68	249.758	301.44	196.722	278.007	266.294	237.924	216.755		3.07869	225.252	283.651	224.621	242.462	258.494	168.135	230.68	237.758	289.44	184.722	266.007	254.294	225.924	204.755		3.07869	0.977676	0.981466	0.991033	0.993725	0.989078	0.976603	0.976605	0.969983	0.98377	0.987832	0.985798	0.990169	0.969057	0.984011	0.982629	5.96242e-05	0.00772167
3.19216	181.206	218.322	176.037	187.473	196.045	138.934	184.069	190.244	219.729	148.902	203.791	196.423	190.543	170.07		3.19216	169.206	206.322	164.037	175.473	184.045	126.934	172.069	178.244	207.729	136.902	191.791	184.423	178.543	158.07		3.19216	0.734416	0.713898	0.723735	0.719172	0.704213	0.73729	0.72847	0.727183	0.706044	0.732106	0.71076	0.718105	0.765825	0.759652	0.727205	0.000331302	0.0182017
3.23057	198.273	250.727	195.025	210.001	222.355	145.497	205.218	205.157	257.159	160.499	220.462	224.071	204.898	184.521		3.23057	186.273	238.727	183.025	198.001	210.355	133.497	193.218	193.157	245.159	148.499	208.462	212.071	192.898	172.521		3.23057	0.808493	0.826023	0.807511	0.811503	0.804883	0.77541	0.818006	0.788024	0.833264	0.794123	0.772542	0.825761	0.827398	0.829101	0.808717	0.000394344	0.0198581
3.25269	198.182	248.225	199.098	214.94	223.833	152.581	204.635	207.202	251.009	162.991	235.201	230.707	205.574	185.012		3.25269	186.182	236.225	187.098	202.94	211.833	140.581	192.635	195.202	239.009	150.991	223.201	218.707	193.574	173.012		3.25269	0.808098	0.817366	0.825481	0.831745	0.810538	0.816557	0.815538	0.796367	0.812361	0.80745	0.827163	0.8516	0.830298	0.83146	0.820144	0.000192248	0.0138654
3.2911	199.8	253.39	198.346	214.936	235.501	156.081	209.8	215.274	249.675	163.176	239.142	227.75	204.383	187.449		3.2911	187.8	241.39	186.346	202.936	223.501	144.081	197.8	203.274	237.675	151.176	227.142	215.75	192.383	175.449		3.2911	0.815121	0.835238	0.822163	0.831729	0.855184	0.836887	0.837404	0.829298	0.807827	0.808439	0.841768	0.840086	0.825189	0.843172	0.830679	0.000187473	0.0136921
3.31322	204.618	254.893	203.667	217.192	233.449	157.897	213.697	215.195	253.411	167.672	235.808	231.229	204.673	189.139		3.31322	192.618	242.893	191.667	205.192	221.449	145.897	201.697	203.195	241.411	155.672	223.808	219.229	192.673	177.139		3.31322	0.836033	0.840438	0.845639	0.840975	0.847332	0.847435	0.853903	0.828976	0.820525	0.832482	0.829413	0.853633	0.826433	0.851294	0.839608	0.000116595	0.0107979
3.35163	208.063	255.457	205.172	216.876	241.578	156.253	209.87	217.686	259.608	166.078	239.131	236.036	212.883	191.189		3.35163	196.063	243.457	193.172	204.876	229.578	144.253	197.87	205.686	247.608	154.078	227.131	224.036	200.883	179.189		3.35163	0.850985	0.84239	0.852279	0.83968	0.878436	0.837886	0.837701	0.839139	0.841588	0.823958	0.841727	0.87235	0.861648	0.861146	0.848637	0.000226617	0.0150538
3.37375	203.829	258.704	208.872	220.964	237.131	159.261	214.477	221.91	261.623	166.961	242.362	237.263	208.343	190.029		3.37375	191.829	246.704	196.872	208.964	225.131	147.261	202.477	209.91	249.623	154.961	230.362	225.263	196.343	178.029		3.37375	0.832608	0.853625	0.868604	0.856434	0.861421	0.855358	0.857205	0.856371	0.848437	0.82868	0.853701	0.877128	0.842175	0.855571	0.85338	0.000161057	0.0126908
3.41216	211.26	259.717	206.049	220.823	238.612	157.123	214.885	214.413	265.352	171.94	242.078	236.235	215.111	195.013		3.41216	199.26	247.717	194.049	208.823	226.612	145.123	202.885	202.413	253.352	159.94	230.078	224.235	203.111	183.013		3.41216	0.864861	0.85713	0.856149	0.855856	0.867087	0.842939	0.858932	0.825786	0.861111	0.855306	0.852649	0.873125	0.871205	0.879523	0.85869	0.000177629	0.0133277
3.43427	211.066	261.455	209.571	219.284	234.424	163.855	217.551	228.141	261.721	173.3	239.719	240.028	213.589	191.737		3.43427	199.066	249.455	197.571	207.284	222.424	151.855	205.551	216.141	249.721	161.3	227.719	228.028	201.589	179.737		3.43427	0.864019	0.863144	0.871688	0.849549	0.851063	0.882042	0.870219	0.881792	0.84877	0.862579	0.843906	0.887894	0.864676	0.863779	0.864651	0.000178464	0.0133591
3.47268	212.301	265.695	208.794	222.03	238.896	160.053	222.119	223.569	259.355	170.584	241.522	235.504	216.806	197.696		3.47268	200.301	253.695	196.794	210.03	226.896	148.053	210.119	211.569	247.355	158.584	229.522	223.504	204.806	185.696		3.47268	0.86938	0.877815	0.86826	0.860803	0.868174	0.859958	0.889558	0.86314	0.840728	0.848054	0.850588	0.870279	0.878475	0.892417	0.866973	0.000218791	0.0147916
3.4948	215.79	262.306	212.622	228.313	239.762	163.96	220.672	226.363	271.64	170.846	243.859	241.956	219.492	199.925		3.4948	203.79	250.306	200.622	216.313	227.762	151.96	208.672	214.363	259.64	158.846	231.859	229.956	207.492	187.925		3.4948	0.884523	0.866088	0.885149	0.886554	0.871488	0.882652	0.883432	0.874538	0.882483	0.849455	0.859249	0.895402	0.889996	0.903129	0.879581	0.000203381	0.0142612
3.53321	214.758	257.759	208.805	224.826	235.518	166.343	212.818	229.801	266.226	170.841	243.91	244.205	222.46	200.959		3.53321	202.758	245.759	196.805	212.826	223.518	154.343	200.818	217.801	254.226	158.841	231.91	232.205	210.46	188.959		3.53321	0.880044	0.850355	0.868308	0.872262	0.855249	0.896493	0.850181	0.888564	0.864082	0.849429	0.859438	0.904159	0.902727	0.908098	0.874956	0.000466684	0.0216029
3.55533	212.421	268.045	209.951	220.734	240.385	167.116	221.355	224.268	270.04	173.934	249.764	236.009	217.609	198.928		3.55533	200.421	256.045	197.951	208.734	228.385	155.116	209.355	212.268	258.04	161.934	237.764	224.009	205.609	186.928		3.55533	0.8699	0.885946	0.873364	0.855491	0.873871	0.900983	0.886324	0.865991	0.877045	0.865969	0.881132	0.872245	0.881919	0.898338	0.877751	0.000156333	0.0125033
3.59374	212.732	263.055	217.634	228.472	238.214	167.092	215.304	225.546	274.195	174.543	249.063	241.391	217.529	198.669		3.59374	200.732	251.055	205.634	216.472	226.214	155.092	203.304	213.546	262.195	162.543	237.063	229.391	205.529	186.669		3.59374	0.87125	0.86868	0.907262	0.887205	0.865564	0.900844	0.860706	0.871205	0.891167	0.869226	0.878534	0.893202	0.881576	0.897093	0.88168	0.000212667	0.0145831
3.61954	217.086	267.178	216.96	228.551	233.721	164.805	215.728	224.903	268.136	177.714	251.914	236.457	223.148	198.346		3.61954	205.086	255.178	204.96	216.551	221.721	152.805	203.728	212.903	256.136	165.714	239.914	224.457	211.148	186.346		3.61954	0.890148	0.882946	0.904288	0.887529	0.848373	0.88756	0.862501	0.868582	0.870573	0.886183	0.8891	0.87399	0.905678	0.895541	0.882357	0.000255495	0.0159842
3.65795	213.551	269.958	214.242	224.762	242.314	167.467	223.711	229.534	277.664	174.509	255.447	244.334	229.08	199.38		3.65795	201.551	257.958	202.242	212.762	230.314	155.467	211.711	217.534	265.664	162.509	243.447	232.334	217.08	187.38		3.65795	0.874805	0.892565	0.892296	0.872	0.881252	0.903022	0.896298	0.887475	0.902958	0.869044	0.902193	0.904661	0.931122	0.90051	0.893586	0.000265463	0.016293
3.68007	220.177	267.379	212.01	231.451	247.425	163.133	225.946	224.647	274.523	181.652	248.293	241.75	224.432	202.515		3.68007	208.177	255.379	200.01	219.451	235.425	151.133	213.946	212.647	262.523	169.652	236.293	229.75	212.432	190.515		3.68007	0.903564	0.883641	0.882449	0.899415	0.900809	0.877848	0.90576	0.867538	0.892282	0.907242	0.875681	0.8946	0.911185	0.915576	0.894114	0.000214021	0.0146295
3.71848	215.669	276.554	215.319	225.829	247.255	165.981	225.916	229.306	273.33	175.17	250.349	241.351	225.758	198.126		3.71848	203.669	264.554	203.319	213.829	235.255	153.981	213.916	217.306	261.33	163.17	238.349	229.351	213.758	186.126		3.71848	0.883998	0.915388	0.897048	0.876373	0.900158	0.894391	0.905633	0.886545	0.888227	0.872579	0.8833	0.893046	0.916873	0.894483	0.893432	0.000171764	0.0131059
3.74613	217.002	271.056	214.554	229.275	245.458	165.595	224.191	232.421	273.504	175.398	254.263	247.098	222.807	202.593		3.74613	205.002	259.056	202.554	217.275	233.458	153.595	212.191	220.421	261.504	163.398	242.263	235.098	210.807	190.593		3.74613	0.889784	0.896364	0.893673	0.890497	0.893282	0.892149	0.89833	0.899253	0.888819	0.873798	0.897805	0.915424	0.904215	0.915951	0.896382	0.00011548	0.0107462
3.78454	213.751	278.958	212.273	234.607	246.829	164.887	221.207	227.08	273.961	173.731	256.63	250.998	225.603	201.741		3.78454	201.751	266.958	200.273	222.607	234.829	152.887	209.207	215.08	261.961	161.731	244.63	238.998	213.603	189.741		3.78454	0.875673	0.923706	0.883609	0.91235	0.898528	0.888036	0.885697	0.877463	0.890372	0.864883	0.906577	0.930609	0.916208	0.911856	0.897541	0.00038903	0.0197238
3.80665	220.978	270.668	213.117	233.763	249.243	166.057	217.169	229.72	277.231	176.214	256.687	244.665	227.367	201.792		3.80665	208.978	258.668	201.117	221.763	237.243	154.057	205.169	217.72	265.231	164.214	244.687	232.665	215.367	189.792		3.80665	0.907041	0.895022	0.887333	0.908891	0.907765	0.894832	0.868602	0.888234	0.901486	0.878162	0.906788	0.90595	0.923775	0.912102	0.898999	0.000214106	0.0146324
3.84507	221.579	273.701	218.091	231.698	243.633	165.602	223.992	228.885	280.13	179.418	253.945	249.04	228.304	203.15		3.84507	209.579	261.701	206.091	219.698	231.633	153.602	211.992	216.885	268.13	167.418	241.945	237.04	216.304	191.15		3.84507	0.90965	0.905516	0.909278	0.900427	0.886299	0.892189	0.897488	0.884827	0.91134	0.895296	0.896627	0.922985	0.927794	0.918628	0.904167	0.000173986	0.0131904
3.87087	221.766	272.428	215.418	235.179	247.013	165.038	222.825	230.146	272.767	178.13	251.93	240.552	224.914	198.402		3.87087	209.766	260.428	203.418	223.179	235.013	153.038	210.825	218.146	260.767	166.13	239.93	228.552	212.914	186.402		3.87087	0.910461	0.901112	0.897485	0.914694	0.899232	0.888913	0.892547	0.889972	0.886314	0.888408	0.889159	0.889935	0.913253	0.89581	0.89695	9.35366e-05	0.00967143
3.90928	216.171	276.799	212.988	234.979	247.46	167.82	225.017	231.399	279.829	182.123	251.953	245.173	223.221	208.879		3.90928	204.171	264.799	200.988	222.979	235.46	155.82	213.017	219.399	267.829	170.123	239.953	233.173	211.221	196.879		3.90928	0.886177	0.916236	0.886764	0.913874	0.900943	0.905072	0.901827	0.895084	0.910316	0.909761	0.889245	0.907928	0.905991	0.94616	0.905384	0.00023212	0.0152355
3.9314	224.315	267.84	212.652	235.239	245.148	169.139	226.802	229.993	274.496	176.661	252.564	246.364	226.631	201.907		3.9314	212.315	255.84	200.652	223.239	233.148	157.139	214.802	217.993	262.496	164.661	240.564	234.364	214.631	189.907		3.9314	0.921525	0.885236	0.885281	0.91494	0.892096	0.912734	0.909384	0.889348	0.89219	0.880552	0.891509	0.912566	0.920618	0.912654	0.901474	0.000213175	0.0146005
3.96981	216.523	269.417	211.064	231.125	249.564	166.128	218.196	235.627	277.891	177.298	253.835	246.115	218.779	200.678		3.96981	204.523	257.417	199.064	219.125	237.564	154.128	206.196	223.627	265.891	165.298	241.835	234.115	206.779	188.678		3.96981	0.887705	0.890693	0.878275	0.898079	0.908993	0.895244	0.87295	0.912333	0.903729	0.883959	0.896219	0.911596	0.886938	0.906748	0.895247	0.000155436	0.0124674
3.99561	214.501	270.644	216.476	238.461	245.798	166.489	226.782	228.518	278.473	177.827	251.141	250.544	220.689	206.998		3.99561	202.501	258.644	204.476	226.461	233.798	154.489	214.782	216.518	266.473	165.827	239.141	238.544	208.689	194.998		3.99561	0.878928	0.894939	0.902153	0.928145	0.894583	0.897341	0.909299	0.88333	0.905708	0.886787	0.886235	0.928842	0.895131	0.93712	0.902039	0.000326084	0.0180578
4.03402	227.529	280.627	219.582	238.263	256.882	166.89	229.218	233.033	278.964	181.764	257.541	241.783	223.77	201.795		4.03402	215.529	268.627	207.582	226.263	244.882	154.89	217.218	221.033	266.964	169.764	245.541	229.783	211.77	189.795		4.03402	0.935475	0.929481	0.915857	0.927334	0.936994	0.899671	0.919612	0.90175	0.907376	0.907841	0.909953	0.894728	0.908346	0.912116	0.914752	0.000176527	0.0132864
4.05614	220.143	273.26	224.298	236.941	250.893	165.281	230.126	231.686	282.775	179.187	255.281	244.401	222.692	203.999		4.05614	208.143	261.26	212.298	224.941	238.893	153.281	218.126	219.686	270.775	167.187	243.281	232.401	210.692	191.999		4.05614	0.903417	0.90399	0.936664	0.921915	0.914078	0.890325	0.923456	0.896255	0.92033	0.89406	0.901578	0.904922	0.903722	0.922708	0.909816	0.000181852	0.0134852
4.09455	226.544	280.58	217.382	235.074	253.173	162.437	230.826	229.38	277.679	181.114	253.705	247.718	227.234	199.137		4.09455	214.544	268.58	205.382	223.074	241.173	150.437	218.826	217.38	265.679	169.114	241.705	235.718	215.234	187.137		4.09455	0.931199	0.929318	0.90615	0.914264	0.922802	0.873805	0.92642	0.886847	0.903009	0.904365	0.895737	0.917838	0.923204	0.899342	0.909593	0.000289718	0.0170211
4.12035	228.863	274.152	216.449	235.337	244.712	162.409	230.171	233.125	278.892	182.504	259.579	244.061	231.125	209.326		4.12035	216.863	262.152	204.449	223.337	232.712	150.409	218.171	221.125	266.892	170.504	247.579	232.061	219.125	197.326		4.12035	0.941265	0.907077	0.902034	0.915342	0.890428	0.873643	0.923647	0.902125	0.907132	0.911799	0.917506	0.903598	0.939894	0.948308	0.913128	0.000412625	0.0203132
4.15876	222.137	280.532	219.603	240.545	247.659	169.877	229.045	236.192	278.719	179.539	259.062	247.223	230.379	197.34		4.15876	210.137	268.532	207.603	228.545	235.659	157.877	217.045	224.192	266.719	167.539	247.062	235.223	218.379	185.34		4.15876	0.912071	0.929152	0.915949	0.936686	0.901704	0.91702	0.91888	0.914638	0.906544	0.895943	0.91559	0.91591	0.936694	0.890706	0.914821	0.000182488	0.0135088
4.18088	220.437	274.579	219.113	235.218	244.895	171.52	226.759	236.181	279.818	179.51	261.933	251.049	227.496	202.481		4.18088	208.437	262.579	207.113	223.218	232.895	159.52	214.759	224.181	267.818	167.51	249.933	239.049	215.496	190.481		4.18088	0.904693	0.908554	0.913787	0.914854	0.891128	0.926564	0.909202	0.914593	0.910279	0.895788	0.92623	0.930808	0.924328	0.915413	0.913301	0.000130833	0.0114382
4.21929	222.18	278.583	221.403	238.187	250.916	171.169	228.315	238.07	281.796	180.96	258.221	249.301	225.924	201.015		4.21929	210.18	266.583	209.403	226.187	238.916	159.169	216.315	226.07	269.796	168.96	246.221	237.301	213.924	189.015		4.21929	0.912258	0.922409	0.923891	0.927022	0.914166	0.924525	0.915789	0.922299	0.917002	0.903542	0.912473	0.924002	0.917585	0.908367	0.917524	4.73489e-05	0.00688106
4.24509	220.039	272.093	225.069	235.001	251.789	170.899	232.474	229.459	278.114	175.874	259.527	254.239	232.689	203.17		4.24509	208.039	260.093	213.069	223.001	239.789	158.899	220.474	217.459	266.114	163.874	247.527	242.239	220.689	191.17		4.24509	0.902965	0.899952	0.940065	0.913964	0.917507	0.922957	0.933397	0.887169	0.904487	0.876344	0.917313	0.943229	0.946602	0.918724	0.916048	0.000429805	0.0207317
4.2835	220.977	277.996	220.373	235.636	250.738	171.642	229.948	237.992	283.413	178.839	256.572	244.006	231.285	201.571		4.2835	208.977	265.996	208.373	223.636	238.738	159.642	217.948	225.992	271.413	166.839	244.572	232.006	219.285	189.571		4.2835	0.907037	0.920377	0.919347	0.916567	0.913485	0.927272	0.922703	0.921981	0.922498	0.892199	0.906362	0.903384	0.94058	0.911039	0.916059	0.000139585	0.0118146
4.30562	225.094	271.89	221.981	242.229	249.328	160.204	232.186	233.402	276.403	178.656	260.499	248.028	237.103	202.235		4.30562	213.094	259.89	209.981	230.229	237.328	148.204	220.186	221.402	264.403	166.656	248.499	236.028	225.103	190.235		4.30562	0.924906	0.89925	0.926441	0.943588	0.90809	0.860835	0.932178	0.903255	0.898672	0.891221	0.920915	0.919045	0.965535	0.91423	0.914869	0.000626655	0.0250331
4.34403	228.366	278.854	222.453	239.755	249.992	169.175	232.668	238.281	278.775	185.849	257.858	247.861	226.464	209.853		4.34403	216.366	266.854	210.453	227.755	237.992	157.175	220.668	226.281	266.775	173.849	245.858	235.861	214.464	197.853		4.34403	0.939108	0.923346	0.928524	0.933449	0.910631	0.912943	0.934218	0.92316	0.906734	0.929686	0.911128	0.918395	0.919901	0.950841	0.924433	0.000154361	0.0124242
4.36984	217.678	276.207	224.744	240.185	252.595	169.139	225.22	232.012	283.469	180.776	264.377	247.896	232.14	198.019		4.36984	205.678	264.207	212.744	228.185	240.595	157.139	213.22	220.012	271.469	168.776	252.377	235.896	220.14	186.019		4.36984	0.892718	0.914187	0.938632	0.935211	0.920591	0.912734	0.902686	0.897585	0.922688	0.902558	0.935287	0.918531	0.944247	0.893969	0.916545	0.000296742	0.0172262
4.40825	228.603	276.559	221.857	243.235	249.934	168.788	231.591	232.179	284.51	180.626	259.752	251.197	230.724	206.469		4.40825	216.603	264.559	209.857	231.235	237.934	156.788	219.591	220.179	272.51	168.626	247.752	239.197	218.724	194.469		4.40825	0.940136	0.915405	0.925894	0.947711	0.910409	0.910695	0.929659	0.898266	0.926227	0.901756	0.918147	0.931384	0.938174	0.934578	0.92346	0.000219488	0.0148151
4.43036	222.866	276.338	224.05	237.699	255.681	170.546	227.445	234.668	285.069	180.804	262.689	248.999	229.37	201.937		4.43036	210.866	264.338	212.05	225.699	243.681	158.546	215.445	222.668	273.069	168.804	250.689	236.999	217.37	189.937		4.43036	0.915236	0.914641	0.93557	0.925022	0.932399	0.920906	0.912106	0.90842	0.928127	0.902707	0.929031	0.922826	0.932366	0.912798	0.920868	0.00010145	0.0100723
4.46877	224.436	276.665	224.678	238.986	247.992	173.95	228.424	238.219	288.431	179.733	264.146	252.069	231.86	209.734		4.46877	212.436	264.665	212.678	226.986	235.992	161.95	216.424	226.219	276.431	167.733	252.146	240.069	219.86	197.734		4.46877	0.92205	0.915772	0.93834	0.930297	0.902978	0.940678	0.916251	0.922907	0.939554	0.89698	0.934431	0.93478	0.943046	0.950269	0.927738	0.000242486	0.015572
4.49458	226.582	267.603	223.388	243.314	252.661	167.542	233.23	236.354	286.899	186.244	257.449	249.755	229.071	204.133		4.49458	214.582	255.603	211.388	231.314	240.661	155.542	221.23	224.354	274.899	174.244	245.449	237.755	217.071	192.133		4.49458	0.931364	0.884416	0.932649	0.948035	0.920843	0.903458	0.936597	0.915299	0.934347	0.931799	0.909612	0.925769	0.931083	0.923352	0.923473	0.00025882	0.0160879
4.53299	227.058	276.35	225.32	235.525	248.363	169.821	228.592	235.324	280.919	186.3	264.914	252.287	234.521	203.282		4.53299	215.058	264.35	213.32	223.525	236.363	157.821	216.592	223.324	268.919	174.3	252.914	240.287	222.521	191.282		4.53299	0.93343	0.914682	0.941173	0.916112	0.904398	0.916695	0.916962	0.911097	0.914021	0.932098	0.937277	0.935628	0.95446	0.919262	0.924807	0.000200334	0.0141539
4.5551	224.934	274.305	222.58	235.352	252.657	167.837	231.858	233.012	284.95	185.999	255.005	247.094	229.571	206.041		4.5551	212.934	262.305	210.58	223.352	240.657	155.837	219.858	221.012	272.95	173.999	243.005	235.094	217.571	194.041		4.5551	0.924211	0.907606	0.929084	0.915403	0.920828	0.905171	0.930789	0.901664	0.927722	0.930489	0.900555	0.915408	0.933228	0.932521	0.91962	0.000142059	0.0119188
4.59352	225.075	275.892	224.22	242.825	254.986	170.69	226.427	236.161	286.569	182.544	265.534	255.95	230.312	202.176		4.59352	213.075	263.892	212.22	230.825	242.986	158.69	214.427	224.161	274.569	170.544	253.534	243.95	218.312	190.176		4.59352	0.924823	0.913097	0.93632	0.946031	0.929739	0.921743	0.907796	0.914511	0.933225	0.912012	0.939574	0.949891	0.936407	0.913947	0.92708	0.000185479	0.0136191
4.62116	226.945	278.848	225.258	240.598	248.882	166.965	231.39	234.234	282.787	184.164	258.754	253.73	228.206	203.972		4.62116	214.945	266.848	213.258	228.598	236.882	154.965	219.39	222.234	270.787	172.164	246.754	241.73	216.206	191.972		4.62116	0.93294	0.923325	0.940899	0.936904	0.906384	0.900106	0.928808	0.90665	0.92037	0.920676	0.914448	0.941247	0.927373	0.922578	0.923051	0.000165506	0.0128649
4.65957	225.138	285.396	220.957	235.038	249.221	171.783	231.718	236.245	288.205	186.132	256.194	249.654	228.432	209.611		4.65957	213.138	273.396	208.957	223.038	237.221	159.783	219.718	224.245	276.205	174.132	244.194	237.654	216.432	197.611		4.65957	0.925097	0.945982	0.921923	0.914116	0.907681	0.928091	0.930196	0.914854	0.938785	0.9312	0.904961	0.925376	0.928343	0.949678	0.926163	0.000172235	0.0131238
4.68169	230.004	279.787	221.888	235.998	249.929	172.254	234.4	237.395	287.295	183.406	259.928	255.385	230.863	202.514		4.68169	218.004	267.787	209.888	223.998	237.929	160.254	222.4	225.395	275.295	171.406	247.928	243.385	218.863	190.514		4.68169	0.946217	0.926575	0.926031	0.918051	0.91039	0.930827	0.941551	0.919546	0.935692	0.916622	0.918799	0.947691	0.93877	0.915571	0.928024	0.000149344	0.0122206
4.7201	228.575	273.746	223.776	235.31	248.948	174.656	227.858	236.847	278.165	184.193	259.418	253.156	230.931	203.72		4.7201	216.575	261.746	211.776	223.31	236.948	162.656	215.858	224.847	266.165	172.193	247.418	241.156	218.931	191.72		4.7201	0.940015	0.905672	0.934361	0.915231	0.906636	0.944779	0.913855	0.91731	0.904661	0.920831	0.916909	0.939012	0.939062	0.921367	0.922836	0.000194776	0.0139562
4.7459	226.64	276.443	221.981	242.273	255.285	175.741	233.041	238.161	285.61	188.583	263.847	256.452	222.56	202.322		4.7459	214.64	264.443	209.981	230.273	243.285	163.741	221.041	226.161	273.61	176.583	251.847	244.452	210.56	190.322		4.7459	0.931616	0.915004	0.926441	0.943769	0.930883	0.951081	0.935797	0.922671	0.929965	0.944307	0.933323	0.951846	0.903156	0.914649	0.931036	0.000199729	0.0141326
4.78431	227.007	276.058	224.577	243.739	249.904	171.074	231.599	237.964	286.968	184.782	258.082	255.59	227.868	208.526		4.78431	215.007	264.058	212.577	231.739	237.904	159.074	219.599	225.964	274.968	172.782	246.082	243.59	215.868	196.526		4.78431	0.933209	0.913672	0.937895	0.949777	0.910294	0.923973	0.929692	0.921867	0.934581	0.923981	0.911958	0.94849	0.925923	0.944464	0.92927	0.000166477	0.0129026
4.80643	225.187	287.02	227.599	241.93	255.918	168.163	233.67	234.86	281.223	182.421	262.005	254.571	227.689	203.011		4.80643	213.187	275.02	215.599	229.93	243.918	156.163	221.67	222.86	269.223	170.421	250.005	242.571	215.689	191.011		4.80643	0.92531	0.951602	0.951228	0.942363	0.933305	0.907065	0.93846	0.909204	0.915055	0.911355	0.926496	0.944522	0.925156	0.91796	0.928506	0.000235727	0.0153534
4.84484	229.078	276.855	228.047	248.288	258.113	175.023	231.955	235.671	282.021	181.185	258.992	254.745	232.198	205.521		4.84484	217.078	264.855	216.047	236.288	246.113	163.023	219.955	223.671	270.021	169.185	246.992	242.745	220.198	193.521		4.84484	0.942198	0.916429	0.953204	0.968421	0.941704	0.946911	0.9312	0.912512	0.917767	0.904745	0.91533	0.945199	0.944496	0.930022	0.933581	0.000334003	0.0182757
4.87065	226.842	278.468	221.671	241.688	252.326	166.81	230.233	238.844	282.602	182.722	260.634	256.232	233.948	203.77		4.87065	214.842	266.468	209.671	229.688	240.326	154.81	218.233	226.844	270.602	170.722	248.634	244.232	221.948	191.77		4.87065	0.932493	0.922011	0.925073	0.941371	0.919561	0.899206	0.923909	0.925457	0.919742	0.912964	0.921416	0.950989	0.952002	0.921607	0.926272	0.000200633	0.0141645
4.90906	225.498	274.789	225.611	241.719	261.867	171.395	231.182	237.829	283.264	189.199	259.806	251.266	232.913	204.834		4.90906	213.498	262.789	213.611	229.719	249.867	159.395	219.182	225.829	271.264	177.199	247.806	239.266	220.913	192.834		4.90906	0.926659	0.909281	0.942457	0.941498	0.956068	0.925838	0.927927	0.921316	0.921992	0.947601	0.918347	0.931653	0.947563	0.926721	0.93178	0.000176285	0.0132772
4.93117	234.22	276.174	230.613	241.231	255.094	173.821	232.29	234.742	282.626	185.876	267.669	251.202	229.941	202.956		4.93117	222.22	264.174	218.613	229.231	243.094	161.821	220.29	222.742	270.626	173.876	255.669	239.202	217.941	190.956		4.93117	0.964516	0.914073	0.964526	0.939498	0.930153	0.939929	0.932618	0.908722	0.919823	0.929831	0.947487	0.931404	0.934815	0.917695	0.933935	0.000281125	0.0167668
4.96958	228.066	282.22	228.486	246.288	250.771	171.877	231.227	234.61	282.736	186.171	263	257.683	231.021	202.616		4.96958	216.066	270.22	216.486	234.288	238.771	159.877	219.227	222.61	270.736	174.171	251	245.683	219.021	190.616		4.96958	0.937805	0.934993	0.955141	0.960224	0.913611	0.928637	0.928118	0.908184	0.920197	0.931408	0.930184	0.956639	0.939448	0.916061	0.932904	0.000258049	0.0160639
4.99539	231.875	273.323	226.563	240.228	253.464	168.598	231.414	238.013	291.13	181.778	259.663	253.337	231.347	202.906		4.99539	219.875	261.323	214.563	228.228	241.464	156.598	219.414	226.013	279.13	169.778	247.663	241.337	219.347	190.906		4.99539	0.954338	0.904208	0.946657	0.935387	0.923916	0.909591	0.928909	0.922067	0.948727	0.907916	0.917817	0.939717	0.940846	0.917455	0.928397	0.000261688	0.0161768
5.0338	228.281	272.019	227.068	239.732	258.797	166.517	231.22	232.965	283.087	185.252	268.517	255.369	237.259	204.557		5.0338	216.281	260.019	215.068	227.732	246.797	154.517	219.22	220.965	271.087	173.252	256.517	243.369	225.259	192.557		5.0338	0.938739	0.899696	0.948885	0.933354	0.944321	0.897504	0.928088	0.901473	0.92139	0.926494	0.950629	0.947629	0.966204	0.92539	0.9307	0.000429929	0.0207347
5.05591	226.32	281.472	225.418	241.908	251.839	176.028	231.093	232.3	284.904	182.34	257.946	245.992	234.067	207.937		5.05591	214.32	269.472	213.418	229.908	239.839	164.028	219.093	220.3	272.904	170.34	245.946	233.992	222.067	195.937		5.05591	0.930227	0.932405	0.941605	0.942273	0.917698	0.952748	0.92755	0.89876	0.927566	0.910922	0.911454	0.911117	0.952513	0.941633	0.928462	0.000278569	0.0166904
5.09433	226.942	274.62	221.935	240.466	258.026	168.063	227.692	237.469	281.811	180.163	258.606	254.48	233.148	201.959		5.09433	214.942	262.62	209.935	228.466	246.026	156.063	215.692	225.469	269.811	168.163	246.606	242.48	221.148	189.959		5.09433	0.932927	0.908696	0.926238	0.936363	0.941371	0.906484	0.913152	0.919848	0.917053	0.89928	0.9139	0.944168	0.948571	0.912904	0.922925	0.000238002	0.0154273
5.12013	227.327	285.786	225.519	242.796	255.504	169.834	228.715	238.946	288.583	188.693	265.308	251.506	230.053	205.663		5.12013	215.327	273.786	213.519	230.796	243.504	157.834	216.715	226.946	276.583	176.693	253.308	239.506	218.053	193.663		5.12013	0.934598	0.947332	0.942051	0.945912	0.931721	0.916771	0.917483	0.925873	0.94007	0.944895	0.938737	0.932587	0.935296	0.930705	0.934574	9.33563e-05	0.00966211
5.15854	226.993	279.901	224.801	242.612	247.752	168.797	230.047	241.039	281.674	185.673	264.341	248.985	228.147	204.167		5.15854	214.993	267.901	212.801	230.612	235.752	156.797	218.047	229.039	269.674	173.673	252.341	236.985	216.147	192.167		5.15854	0.933148	0.926969	0.938883	0.945158	0.90206	0.910747	0.923122	0.934412	0.916587	0.928745	0.935153	0.922771	0.92712	0.923515	0.926314	0.000128174	0.0113214
5.18066	225.893	279.748	222.391	243.057	249.76	173.544	229.821	239.432	285.003	188.323	262.653	253.661	228.002	207.284		5.18066	213.893	267.748	210.391	231.057	237.76	161.544	217.821	227.432	273.003	176.323	250.653	241.661	216.002	195.284		5.18066	0.928374	0.92644	0.92825	0.946982	0.909743	0.93832	0.922165	0.927856	0.927902	0.942917	0.928898	0.940979	0.926498	0.938495	0.930987	9.35449e-05	0.00967186
5.21907	231.413	277.139	221.478	244.258	251.748	168.859	226.692	237.043	285.96	184.261	266.1	250.258	229.707	205.112		5.21907	219.413	265.139	209.478	232.258	239.748	156.859	214.692	225.043	273.96	172.261	254.1	238.258	217.707	193.112		5.21907	0.952333	0.917412	0.924222	0.951904	0.91735	0.911107	0.908918	0.91811	0.931155	0.921194	0.941672	0.927728	0.933811	0.928057	0.927498	0.000186469	0.0136554
5.24487	229.22	280.47	223.692	244.083	253.463	170.06	227.586	238.814	283.44	188.242	262.854	249.806	231.805	206.262		5.24487	217.22	268.47	211.692	232.083	241.463	158.06	215.586	226.814	271.44	176.242	250.854	237.806	219.805	194.262		5.24487	0.942814	0.928938	0.93399	0.951187	0.923912	0.918083	0.912703	0.925335	0.92259	0.942483	0.929643	0.925968	0.94281	0.933583	0.931003	0.000116935	0.0108137
5.28328	226.034	273.198	222.849	239.408	251.985	167.84	231.016	243.027	286.213	187.575	260.81	253.671	236.276	202.464		5.28328	214.034	261.198	210.849	227.408	239.985	155.84	219.016	231.027	274.213	175.575	248.81	241.671	224.276	190.464		5.28328	0.928986	0.903776	0.930271	0.932026	0.918257	0.905189	0.927224	0.942523	0.932015	0.938917	0.922068	0.941017	0.961988	0.915331	0.928542	0.000237497	0.0154109
5.3054	229.25	276.312	228.632	242.246	256.503	171.881	234.712	235.887	285.312	186.297	264.466	248.393	227.745	208.536		5.3054	217.25	264.312	216.632	230.246	244.503	159.881	222.712	223.887	273.312	174.297	252.466	236.393	215.745	196.536		5.3054	0.942944	0.914551	0.955785	0.943658	0.935544	0.92866	0.942872	0.913393	0.928952	0.932082	0.935617	0.920466	0.925396	0.944512	0.933174	0.000150023	0.0122484
5.34381	226.529	275.216	231.066	241.39	255.779	171.56	229.89	236.647	289.521	184.741	263.668	256.218	235.199	204.547		5.34381	214.529	263.216	219.066	229.39	243.779	159.56	217.89	224.647	277.521	172.741	251.668	244.218	223.199	192.547		5.34381	0.931134	0.910758	0.966524	0.94015	0.932774	0.926796	0.922457	0.916494	0.943258	0.923761	0.932659	0.950935	0.957368	0.925341	0.934315	0.000248918	0.0157771
5.36961	230.624	278.955	222.055	239.257	248.828	168.231	229.713	238.931	284.732	183.12	261.831	251.438	232.246	203.538		5.36961	218.624	266.955	210.055	227.257	236.828	156.231	217.713	226.931	272.732	171.12	249.831	239.438	220.246	191.538		5.36961	0.948908	0.923696	0.926768	0.931408	0.906177	0.90746	0.921708	0.925812	0.926981	0.915093	0.925851	0.932323	0.944702	0.920492	0.925527	0.00014246	0.0119357
5.40802	229.284	290.176	226.705	238.245	251.75	173.561	227.703	230.925	290.712	182.85	263.221	251.638	227.451	209.42		5.40802	217.284	278.176	214.705	226.245	239.75	161.561	215.703	218.925	278.712	170.85	251.221	239.638	215.451	197.42		5.40802	0.943092	0.962522	0.947284	0.92726	0.917357	0.938419	0.913198	0.89315	0.947306	0.913649	0.931003	0.933101	0.924135	0.94876	0.931445	0.000333908	0.0182732
5.43014	232.14	274.753	226.867	242.958	248.161	168.277	230.937	236.136	282.757	187.339	266.851	252.879	230.019	209.649		5.43014	220.14	262.753	214.867	230.958	236.161	156.277	218.937	224.136	270.757	175.339	254.851	240.879	218.019	197.649		5.43014	0.955488	0.909156	0.947998	0.946576	0.903625	0.907727	0.92689	0.914409	0.920268	0.937654	0.944455	0.937934	0.93515	0.949861	0.931228	0.000304026	0.0174364
5.46855	230.801	277.63	229.91	244.846	255.627	173.399	226.659	231.886	291.092	184.916	268.635	254.964	226.495	217.309		5.46855	218.801	265.63	217.91	232.846	243.627	161.399	214.659	219.886	279.092	172.916	256.635	242.964	214.495	205.309		5.46855	0.949676	0.919111	0.961424	0.954314	0.932192	0.937478	0.908779	0.897071	0.948598	0.924697	0.951067	0.946052	0.920034	0.986673	0.938369	0.000545067	0.0233467
5.4962	224.727	278.208	222.325	241.674	249.947	174.801	229.763	234.136	290.049	185.526	261.408	257.131	231.538	205.02		5.4962	212.727	266.208	210.325	229.674	237.947	162.801	217.763	222.136	278.049	173.526	249.408	245.131	219.538	193.02		5.4962	0.923313	0.921111	0.927959	0.941314	0.910459	0.945621	0.92192	0.90625	0.945053	0.927959	0.924284	0.95449	0.941665	0.927615	0.929929	0.000193541	0.0139119
5.53461	227	284.375	231.933	239.552	255.26	175.207	233.369	236.596	281.947	179.849	266.401	249.403	233.554	205.462		5.53461	215	272.375	219.933	227.552	243.26	163.207	221.369	224.596	269.947	167.849	254.401	237.403	221.554	193.462		5.53461	0.933179	0.94245	0.97035	0.932617	0.930788	0.947979	0.937186	0.916286	0.917515	0.8976	0.942788	0.924399	0.950312	0.929739	0.933799	0.000305747	0.0174856
5.55672	230.14	287.237	223.545	237.073	250.131	176.025	232.526	233.986	291.232	184.907	263.255	250.186	235.687	203.123		5.55672	218.14	275.237	211.545	225.073	238.131	164.025	220.526	221.986	279.232	172.907	251.255	238.186	223.687	191.123		5.55672	0.946807	0.952352	0.933342	0.922456	0.911163	0.952731	0.933617	0.905638	0.949074	0.924649	0.931129	0.927448	0.959462	0.918498	0.933455	0.00027398	0.0165523
5.59513	226.438	283.639	218.903	238.771	251.903	172.373	234.097	236.883	289.753	183.917	260.06	252.638	231.545	211.493		5.59513	214.438	271.639	206.903	226.771	239.903	160.373	222.097	224.883	277.753	171.917	248.06	240.638	219.545	199.493		5.59513	0.930739	0.939903	0.912861	0.929416	0.917943	0.931518	0.940268	0.917457	0.944047	0.919355	0.919288	0.936995	0.941695	0.958723	0.931443	0.000170004	0.0130386
5.62094	224.491	280.004	221.218	237.69	255.503	173.21	230.493	235.703	285.445	183.359	261.388	256.567	233.188	210.316		5.62094	212.491	268.004	209.218	225.69	243.503	161.21	218.493	223.703	273.445	171.359	249.388	244.567	221.188	198.316		5.62094	0.922289	0.927325	0.923075	0.924985	0.931718	0.93638	0.92501	0.912643	0.929405	0.916371	0.92421	0.952294	0.948743	0.953066	0.930537	0.000161962	0.0127264
5.65935	224.286	279.712	224.407	239.048	252.819	170.384	231.348	239.501	287.87	183.93	267.159	254.937	235.888	206.233		5.65935	212.286	267.712	212.407	227.048	240.819	158.384	219.348	227.501	275.87	171.93	255.159	242.937	223.888	194.233		5.65935	0.921399	0.926315	0.937145	0.930551	0.921448	0.919965	0.92863	0.928138	0.937647	0.919424	0.945597	0.945947	0.960324	0.933444	0.932569	0.000140379	0.0118482
5.68147	219.627	282.568	230.627	239.507	255.236	172.238	231.085	236.621	290.669	186.075	259.981	253.835	227.962	204.296		5.68147	207.627	270.568	218.627	227.507	243.236	160.238	219.085	224.621	278.669	174.075	247.981	241.835	215.962	192.296		5.68147	0.901177	0.936197	0.964587	0.932432	0.930696	0.930734	0.927516	0.916388	0.94716	0.930895	0.918996	0.941656	0.926327	0.924135	0.930636	0.000219871	0.014828
5.71988	230.219	283.862	227.612	244.255	251.23	171.686	232.092	242.135	288.744	183.691	266.476	252.734	229.559	202.756		5.71988	218.219	271.862	215.612	232.255	239.23	159.686	220.092	230.135	276.744	171.691	254.476	240.734	217.559	190.756		5.71988	0.94715	0.940674	0.951285	0.951892	0.915368	0.927528	0.93178	0.938883	0.940617	0.918146	0.943065	0.937369	0.933177	0.916734	0.935262	0.000147642	0.0121508
5.74568	216.93	279.318	229.852	240.737	252.423	169.157	230.57	239.998	291.11	187.307	263.31	251.621	234.462	207.816		5.74568	204.93	267.318	217.852	228.737	240.423	157.157	218.57	227.998	279.11	175.307	251.31	239.621	222.462	195.816		5.74568	0.889471	0.924952	0.961168	0.937473	0.919932	0.912838	0.925336	0.930165	0.948659	0.937483	0.931333	0.933035	0.954207	0.941052	0.931936	0.000321833	0.0179397
5.78409	223.514	279.509	229.864	234.704	254.631	173.75	231.54	242.222	288.655	185.862	265.582	255.87	236.678	211.515		5.78409	211.514	267.509	217.864	222.704	242.631	161.75	219.54	230.222	276.655	173.862	253.582	243.87	224.678	199.515		5.78409	0.918048	0.925613	0.961221	0.912747	0.928381	0.939516	0.929443	0.939238	0.940315	0.929756	0.939752	0.94958	0.963712	0.958828	0.938297	0.000246325	0.0156948
5.80621	223.203	277.727	221.322	244.232	251.441	175.081	234.502	239.53	289	180.91	266.303	254.875	234.265	204.674		5.80621	211.203	265.727	209.322	232.232	239.441	163.081	222.502	227.53	277	168.91	254.303	242.875	222.265	192.674		5.80621	0.916698	0.919447	0.923534	0.951797	0.916175	0.947248	0.941983	0.928256	0.941488	0.903274	0.942424	0.945706	0.953362	0.925952	0.932667	0.000242332	0.015567
5.84462	222.251	281.727	223.094	241.815	256.089	172.445	233.163	242.313	291.505	185.778	263.304	253.972	235.461	205.078		5.84462	210.251	269.727	211.094	229.815	244.089	160.445	221.163	230.313	279.505	173.778	251.304	241.972	223.461	193.078		5.84462	0.912566	0.933287	0.931352	0.941891	0.93396	0.931936	0.936314	0.93961	0.950002	0.929307	0.93131	0.94219	0.958492	0.927893	0.935722	0.000116793	0.0108071
5.87042	223.881	282.764	222.249	239.999	254.709	177.197	235.547	235.282	286.977	182.773	265.001	261.124	231.592	208.872		5.87042	211.881	270.764	210.249	227.999	242.709	165.197	223.547	223.282	274.977	170.773	253.001	249.124	219.592	196.872		5.87042	0.919641	0.936875	0.927624	0.934449	0.928679	0.959538	0.946407	0.910925	0.934612	0.913237	0.937599	0.970038	0.941897	0.946127	0.936261	0.000269479	0.0164158
5.90883	222.512	277.715	227.511	242.09	250.261	172.291	232.455	235.912	288.75	188.804	264.336	261.188	233.916	208.6		5.90883	210.512	265.715	215.511	230.09	238.261	160.291	220.455	223.912	276.75	176.804	252.336	249.188	221.916	196.6		5.90883	0.913699	0.919405	0.95084	0.943019	0.91166	0.931042	0.933316	0.913495	0.940638	0.945489	0.935135	0.970287	0.951865	0.944819	0.936051	0.000291556	0.017075
5.93095	223.925	276.449	226.563	242.322	254.101	173.787	230.172	234.838	285.638	184.966	264.531	259.108	231.47	210.252		5.93095	211.925	264.449	214.563	230.322	242.101	161.787	218.172	222.838	273.638	172.966	252.531	247.108	219.47	198.252		5.93095	0.919832	0.915025	0.946657	0.943969	0.926353	0.939731	0.923651	0.909114	0.930061	0.924964	0.935857	0.962188	0.941374	0.952759	0.933681	0.00022601	0.0150336
5.96936	224.05	281.137	225.324	242.004	255.49	172.586	231.269	239.58	284.162	188.233	264.296	254.823	236.805	207.167		5.96936	212.05	269.137	213.324	230.004	243.49	160.586	219.269	227.58	272.162	176.233	252.296	242.823	224.805	195.167		5.96936	0.920375	0.931246	0.941191	0.942666	0.931668	0.932755	0.928295	0.92846	0.925044	0.942435	0.934987	0.945503	0.964257	0.937933	0.936201	0.000118312	0.0108772
5.99516	225.335	279.463	222.825	239.639	253.318	172.075	238.948	238.672	292.223	188.875	266.379	254.732	236.177	207.146		5.99516	213.335	267.463	210.825	227.639	241.318	160.075	226.948	226.672	280.223	176.875	254.379	242.732	224.177	195.146		5.99516	0.925952	0.925453	0.930165	0.932973	0.923357	0.929787	0.960805	0.924755	0.952442	0.945869	0.942706	0.945149	0.961563	0.937832	0.938486	0.000174021	0.0131917
6.03357	224.362	275.588	230.609	240.48	258.543	170.191	239.493	238.797	289.604	185.529	263.6	257.232	236.534	203.562		6.03357	212.362	263.588	218.609	228.48	246.543	158.191	227.493	226.797	277.604	173.529	251.6	245.232	224.534	191.562		6.03357	0.921729	0.912045	0.964508	0.93642	0.943349	0.918844	0.963112	0.925265	0.94354	0.927975	0.932407	0.954883	0.963095	0.920608	0.937699	0.000323877	0.0179966
6.05569	228.714	279.833	224.499	245.626	253.686	172.963	232.812	241.927	289.336	182.008	265.137	257.879	236.401	209.395		6.05569	216.714	267.833	212.499	233.626	241.686	160.963	220.812	229.927	277.336	170.008	253.137	245.879	224.401	197.395		6.05569	0.940618	0.926734	0.937551	0.957511	0.924765	0.934945	0.934828	0.938035	0.94263	0.909146	0.938103	0.957403	0.962524	0.94864	0.939531	0.000201654	0.0142005
6.0941	231.02	278.756	228.772	242.608	252.868	174.426	235.452	238.953	289.272	181.872	267.36	251.948	239.207	209.222		6.0941	219.02	266.756	216.772	230.608	240.868	162.426	223.452	226.953	277.272	169.872	255.36	239.948	227.207	197.222		6.0941	0.950627	0.923007	0.956403	0.945142	0.921635	0.943443	0.946005	0.925902	0.942412	0.908419	0.946341	0.934308	0.97456	0.947809	0.940429	0.000277669	0.0166634
6.1199	226.288	281.723	230.383	243.69	258.838	170.164	236.293	235.594	291.136	182.528	265.913	256.825	242.058	209.308		6.1199	214.288	269.723	218.383	231.69	246.838	158.164	224.293	223.594	279.136	170.528	253.913	244.825	230.058	197.308		6.1199	0.930088	0.933273	0.963511	0.949576	0.944478	0.918687	0.949565	0.912198	0.948748	0.911927	0.940979	0.953299	0.986789	0.948222	0.942239	0.000411979	0.0202973
6.15832	224.821	280.974	223.682	241.732	256.125	173.689	237.698	237.613	293.194	187.272	269.239	253.115	236.672	208.198		6.15832	212.821	268.974	211.682	229.732	244.125	161.689	225.698	225.613	281.194	175.272	257.239	241.115	224.672	196.198		6.15832	0.923721	0.930682	0.933946	0.941551	0.934097	0.939162	0.955513	0.920435	0.955742	0.937296	0.953305	0.938853	0.963686	0.942887	0.940777	0.000157253	0.0125401
6.18043	229.911	280.306	232.463	239.224	255.666	172.124	233.915	237.409	287.259	191.792	268.655	247.994	239.311	206.292		6.18043	217.911	268.306	220.463	227.224	243.666	160.124	221.915	225.409	275.259	179.792	256.655	235.994	227.311	194.292		6.18043	0.945813	0.92837	0.972688	0.931272	0.932341	0.930072	0.939497	0.919603	0.93557	0.961468	0.951141	0.918912	0.975006	0.933728	0.941106	0.000321859	0.0179404
6.21884	229.387	276.311	227.912	247.647	256.667	174.952	234.339	234.28	287.53	183.669	266.099	251.878	237.247	208.763		6.21884	217.387	264.311	215.912	235.647	244.667	162.952	222.339	222.28	275.53	171.669	254.099	239.878	225.247	196.763		6.21884	0.943539	0.914547	0.952609	0.965794	0.936171	0.946498	0.941293	0.906837	0.936491	0.918029	0.941668	0.934036	0.966153	0.945603	0.939233	0.000298734	0.0172839
6.24465	224.194	275.785	226.884	238.407	254.734	173.61	231.622	235.811	290.75	187.123	269.412	255.209	231.15	206.188		6.24465	212.194	263.785	214.884	226.407	242.734	161.61	219.622	223.811	278.75	175.123	257.412	243.209	219.15	194.188		6.24465	0.921	0.912727	0.948073	0.927924	0.928775	0.938703	0.92979	0.913083	0.947436	0.936499	0.953946	0.947006	0.940001	0.933228	0.934157	0.000165477	0.0128638
6.28306	225.493	282.272	225.837	241.588	255.646	175.277	230.963	242.302	288.494	181.31	261.602	257.959	233.765	204.698		6.28306	213.493	270.272	213.837	229.588	243.646	163.277	218.963	230.302	276.494	169.31	249.602	245.959	221.765	192.698		6.28306	0.926638	0.935173	0.943454	0.940961	0.932265	0.948386	0.927	0.939565	0.939768	0.905413	0.925003	0.957714	0.951217	0.926067	0.935616	0.000176917	0.013301
6.30517	231.485	278.895	221.315	245.653	254.957	170.212	229.051	235.266	289.382	184.81	266.562	255.521	238.303	207.492		6.30517	219.485	266.895	209.315	233.653	242.957	158.212	217.051	223.266	277.382	172.81	254.562	243.521	226.303	195.492		6.30517	0.952645	0.923488	0.923503	0.957621	0.929628	0.918966	0.918905	0.91086	0.942786	0.92413	0.943384	0.948221	0.970682	0.939495	0.936023	0.000301398	0.0173608
6.34358	224.751	276.649	230.063	239.562	253.921	172.044	230.751	235.783	292.809	188.67	263.726	254.907	228.576	210.565		6.34358	212.751	264.649	218.063	227.562	241.921	160.044	218.751	223.783	280.809	176.67	251.726	242.907	216.576	198.565		6.34358	0.923417	0.915717	0.962099	0.932658	0.925664	0.929607	0.926102	0.912969	0.954434	0.944772	0.932874	0.94583	0.92896	0.954263	0.934955	0.000225316	0.0150105
6.37123	224.332	274.496	226.618	245.13	250.341	175.815	237.493	242.664	291.864	186.122	267.697	262.04	239.833	200.676		6.37123	212.332	262.496	214.618	233.13	238.341	163.815	225.493	230.664	279.864	174.122	255.697	250.04	227.833	188.676		6.37123	0.921599	0.908267	0.9469	0.955478	0.911966	0.951511	0.954645	0.941042	0.951222	0.931146	0.94759	0.973605	0.977245	0.906738	0.941354	0.000509678	0.022576
6.40964	226.791	275.269	221.92	241.884	261.061	171.478	234.084	237.267	287.031	183.6	262.247	254.072	233.966	202.362		6.40964	214.791	263.269	209.92	229.884	249.061	159.478	222.084	225.267	275.031	171.6	250.247	242.072	221.966	190.362		6.40964	0.932272	0.910942	0.926172	0.942174	0.952984	0.92632	0.940213	0.919023	0.934795	0.91766	0.927393	0.942579	0.95208	0.914841	0.931389	0.000179112	0.0133833
6.43176	227.806	275.652	231.632	241.457	258.723	173.389	230.727	236.964	292.415	182.052	265.83	255.896	229.342	202.286		6.43176	215.806	263.652	219.632	229.457	246.723	161.389	218.727	224.964	280.415	170.052	253.83	243.896	217.342	190.286		6.43176	0.936677	0.912267	0.969022	0.940424	0.944038	0.93742	0.926001	0.917787	0.953095	0.909381	0.940671	0.949681	0.932246	0.914476	0.934513	0.000294481	0.0171604
6.47017	228.485	277.695	230.258	243.493	258.722	170.221	230.207	235.72	290.802	185.186	265.715	252.39	232.966	208.208		6.47017	216.485	265.695	218.258	231.493	246.722	158.221	218.207	223.72	278.802	173.186	253.715	240.39	220.966	196.208		6.47017	0.939624	0.919336	0.962959	0.948769	0.944034	0.919018	0.923799	0.912712	0.947612	0.926141	0.940245	0.93603	0.94779	0.942936	0.9365	0.000204497	0.0143002
6.49597	223.753	281.382	231.086	239.24	255.499	178.555	230.261	239.422	287.77	184.582	265.514	252.251	234.218	200.134		6.49597	211.753	269.382	219.086	227.24	243.499	166.555	218.261	227.422	275.77	172.582	253.514	240.251	222.218	188.134		6.49597	0.919085	0.932093	0.966613	0.931338	0.931702	0.967426	0.924028	0.927815	0.937307	0.922911	0.9395	0.935488	0.953161	0.904134	0.935186	0.000304834	0.0174595
6.53438	228.4	282.263	229.302	240.328	255.321	174.174	232.089	237.807	287.092	182.334	267.227	257.394	236.577	210.647		6.53438	216.4	270.263	217.302	228.328	243.321	162.174	220.089	225.807	275.092	170.334	255.227	245.394	224.577	198.647		6.53438	0.939255	0.935142	0.958742	0.935797	0.931021	0.941979	0.931767	0.921226	0.935002	0.910889	0.945849	0.955514	0.963279	0.954657	0.940009	0.000215528	0.0146809
6.5565	230.283	275.066	227.641	242.41	252.654	178.213	238.415	235.318	292.885	183.545	271.493	254.973	238.626	208.12		6.5565	218.283	263.066	215.641	230.41	240.654	166.213	226.415	223.318	280.885	171.545	259.493	242.973	226.626	196.12		6.5565	0.947428	0.910239	0.951413	0.94433	0.920816	0.96544	0.958549	0.911072	0.954692	0.917365	0.961658	0.946087	0.972068	0.942513	0.943119	0.000416822	0.0204162
6.59491	230.585	277.037	228.745	242.098	264.796	180.64	231.92	236.732	295.609	185.142	261.89	253.273	234.409	204.05		6.59491	218.585	265.037	216.745	230.098	252.796	168.64	219.92	224.732	283.609	173.142	249.89	241.273	222.409	192.05		6.59491	0.948739	0.917059	0.956284	0.943051	0.967275	0.979537	0.931051	0.916841	0.963951	0.925906	0.92607	0.939468	0.95398	0.922953	0.942297	0.000398415	0.0199603
6.62071	232.226	276.436	226.854	243.962	253.254	171.776	229.478	238.926	285.186	187.843	266.496	255.343	235.295	207.898		6.62071	220.226	264.436	214.854	231.962	241.254	159.776	217.478	226.926	273.186	175.843	254.496	243.343	223.295	195.898		6.62071	0.955861	0.91498	0.947941	0.950691	0.923112	0.928051	0.920713	0.925792	0.928524	0.94035	0.94314	0.947528	0.95778	0.941446	0.937565	0.000191565	0.0138407
6.65913	225.347	274.11	223.267	247.787	254.375	172.319	233.23	238.769	290.744	190.962	262.84	264.195	233.711	207.175		6.65913	213.347	262.11	211.267	235.787	242.375	160.319	221.23	226.769	278.744	178.962	250.84	252.195	221.711	195.175		6.65913	0.926004	0.906931	0.932115	0.966368	0.927401	0.931205	0.936597	0.925151	0.947415	0.957029	0.929591	0.981996	0.950986	0.937971	0.939769	0.00037354	0.0193272
6.68124	229.929	278.648	228.027	244.968	250.715	167.99	227.911	237.563	291.045	185.395	270.232	259.24	231.978	207.103		6.68124	217.929	266.648	216.027	232.968	238.715	155.99	215.911	225.563	279.045	173.395	258.232	247.24	219.978	195.103		6.68124	0.945892	0.922633	0.953116	0.954814	0.913397	0.90606	0.914079	0.920231	0.948438	0.927259	0.956985	0.962702	0.943553	0.937625	0.936199	0.000346427	0.0186125
6.71965	233.39	281.542	227.38	236.987	253.074	174.019	233.573	238.918	288.891	182.258	267.367	257.218	234.557	207.971		6.71965	221.39	269.542	215.38	224.987	241.074	162.019	221.573	226.918	276.891	170.258	255.367	245.218	222.557	195.971		6.71965	0.960914	0.932647	0.950262	0.922104	0.922423	0.941079	0.93805	0.925759	0.941117	0.910483	0.946367	0.954829	0.954615	0.941797	0.938746	0.00021242	0.0145746
6.74546	230.291	281.353	229.669	247.049	258.804	174.294	235.137	243.539	293.844	184.733	269.712	259.143	235.363	209.24		6.74546	218.291	269.353	217.669	235.049	246.804	162.294	223.137	231.539	281.844	172.733	257.712	247.143	223.363	197.24		6.74546	0.947463	0.931993	0.960361	0.963343	0.944348	0.942676	0.944671	0.944611	0.957952	0.923718	0.955058	0.962324	0.958072	0.947895	0.948892	0.000134069	0.0115788
6.78387	235.525	283.647	231.181	243.502	253.704	168.85	228.306	235.014	285.753	185.479	270.285	251.86	231.276	210.896		6.78387	223.525	271.647	219.181	231.502	241.704	156.85	216.306	223.014	273.753	173.479	258.285	239.86	219.276	198.896		6.78387	0.97018	0.939931	0.967032	0.948806	0.924834	0.911055	0.915751	0.909832	0.930451	0.927708	0.957181	0.933966	0.940541	0.955853	0.93808	0.00038915	0.0197269
6.80598	226.264	281.267	225.326	251.175	254.919	170.638	230.461	236.383	285.565	182.615	262.884	262.875	233.963	207.808		6.80598	214.264	269.267	213.326	239.175	242.919	158.638	218.461	224.383	273.565	170.615	250.884	250.875	221.963	195.808		6.80598	0.929984	0.931695	0.941199	0.980253	0.929483	0.921441	0.924875	0.915417	0.929812	0.912392	0.929754	0.976856	0.952067	0.941013	0.936874	0.0004168	0.0204157
6.84439	228.623	276.727	228.436	237.543	254.889	172.65	234.132	238.913	284.665	194.008	268.061	254.677	237.39	207.518		6.84439	216.623	264.727	216.436	225.543	242.889	160.65	222.132	226.913	272.665	182.008	256.061	242.677	225.39	195.518		6.84439	0.940223	0.915987	0.954921	0.924383	0.929368	0.933127	0.940416	0.925739	0.926753	0.973318	0.948939	0.944935	0.966766	0.93962	0.940321	0.000270155	0.0164364
6.8702	229.866	285.427	230.724	242.733	261.361	169.939	231.054	234.325	296.111	189.55	267.302	254.811	234.837	202.633		6.8702	217.866	273.427	218.724	230.733	249.361	157.939	219.054	222.325	284.111	177.55	255.302	242.811	222.837	190.633		6.8702	0.945618	0.94609	0.965015	0.945654	0.954132	0.91738	0.927385	0.907021	0.965657	0.949478	0.946127	0.945456	0.955816	0.916143	0.941927	0.000328248	0.0181176
6.90861	228.98	289.681	233.785	243.184	253.022	172.248	226.469	239.962	289.81	195.268	264.92	249.486	234.412	208.056		6.90861	216.98	277.681	221.785	231.184	241.022	160.248	214.469	227.962	277.81	183.268	252.92	237.486	222.412	196.056		6.90861	0.941773	0.960809	0.978521	0.947502	0.922224	0.930792	0.907974	0.930018	0.944241	0.980056	0.937299	0.924722	0.953993	0.942205	0.943009	0.000418415	0.0204552
6.93073	224.935	281.4	231.394	248.739	255.863	172.265	228.47	242.802	290.066	187.504	263.025	252.188	235.23	212.753		6.93073	212.935	269.4	219.394	236.739	243.863	160.265	216.47	230.802	278.066	175.504	251.025	240.188	223.23	200.753		6.93073	0.924216	0.932156	0.967971	0.970269	0.933095	0.930891	0.916446	0.941605	0.945111	0.938537	0.930276	0.935243	0.957501	0.964778	0.942007	0.000285127	0.0168857
6.96914	224.248	279.796	233.317	244.848	259.682	173.003	229.044	242.422	290.903	189.342	266.817	251.95	223.663	208.066		6.96914	212.248	267.796	221.317	232.848	247.682	161.003	217.044	230.422	278.903	177.342	254.817	239.95	211.663	196.066		6.96914	0.921234	0.926606	0.976456	0.954322	0.947708	0.935178	0.918876	0.940054	0.947956	0.948366	0.944329	0.934316	0.907887	0.942253	0.938967	0.000292334	0.0170978
6.99494	227.015	274.961	232.446	243.381	259.561	171.349	234.651	244.402	292.361	187.672	264.312	253.653	231.329	210.206		6.99494	215.015	262.961	220.446	231.381	247.561	159.349	222.651	232.402	280.361	175.672	252.312	241.653	219.329	198.206		6.99494	0.933244	0.909876	0.972613	0.94831	0.947245	0.92557	0.942613	0.948132	0.952911	0.939435	0.935046	0.940947	0.940769	0.952537	0.942089	0.00020835	0.0144343
7.03335	229.921	279.19	232.198	243.495	254.923	172.785	231.333	235.29	284.73	189.37	272.05	255.495	233.809	205.711		7.03335	217.921	267.19	220.198	231.495	242.923	160.785	219.333	223.29	272.73	177.37	260.05	243.495	221.809	193.711		7.03335	0.945857	0.924509	0.971519	0.948777	0.929498	0.933911	0.928566	0.910958	0.926974	0.948516	0.963722	0.94812	0.951406	0.930935	0.940233	0.000272972	0.0165219
7.05547	223.211	287.783	229.011	237.517	258.573	172.181	236.88	242.27	286.158	188.505	267.85	256.618	236.255	202.718		7.05547	211.211	275.783	217.011	225.517	246.573	160.181	224.88	230.27	274.158	176.505	255.85	244.618	224.255	190.718		7.05547	0.916733	0.954242	0.957458	0.924276	0.943464	0.930403	0.95205	0.939434	0.931828	0.94389	0.948157	0.952493	0.961898	0.916552	0.94092	0.000220602	0.0148527
7.09388	227.19	281.584	227.188	244.266	258.898	172.766	227.008	239.755	288.903	186.836	263.112	260.726	230.794	211.832		7.09388	215.19	269.584	215.188	232.266	246.898	160.766	215.008	227.755	276.903	174.836	251.112	248.726	218.794	199.832		7.09388	0.934003	0.932792	0.949415	0.951937	0.944708	0.933801	0.910256	0.929174	0.941158	0.934965	0.930599	0.968488	0.938474	0.960352	0.940009	0.000209593	0.0144773
7.11968	231.241	280.033	229.053	236.756	258.486	172.172	232.088	237.941	284.672	188.104	262.551	250.298	232.953	209.471		7.11968	219.241	268.033	217.053	224.756	246.486	160.172	220.088	225.941	272.672	176.104	250.551	238.298	220.953	197.471		7.11968	0.951586	0.927426	0.957643	0.921157	0.943131	0.930351	0.931763	0.921773	0.926777	0.941745	0.92852	0.927884	0.947735	0.949005	0.936178	0.000142661	0.0119441
7.15809	231.073	276.886	229.763	242.108	257.567	172.767	232.707	240.304	294.046	188.618	264.754	256.285	234.366	206.658		7.15809	219.073	264.886	217.763	230.108	245.567	160.767	220.707	228.304	282.046	176.618	252.754	244.285	222.366	194.658		7.15809	0.950857	0.916537	0.960775	0.943092	0.939615	0.933807	0.934383	0.931414	0.958638	0.944494	0.936684	0.951196	0.953795	0.935487	0.942198	0.000146179	0.0120904
7.18021	224.727	281.683	229.243	240.738	254.098	171.393	229.673	241.487	290.54	185.605	267.937	263.029	232.184	206.843		7.18021	212.727	269.683	217.243	228.738	242.098	159.393	217.673	229.487	278.54	173.605	255.937	251.029	220.184	194.843		7.18021	0.923313	0.933135	0.958481	0.937477	0.926342	0.925826	0.921539	0.93624	0.946722	0.928382	0.94848	0.977456	0.944436	0.936376	0.938872	0.000237378	0.0154071
7.21862	229.44	275.204	227.211	241.289	259.657	169.222	233	246.283	283.669	187.012	263.33	257.243	234.889	207.744		7.21862	217.44	263.204	215.211	229.289	247.657	157.222	221	234.283	271.669	175.012	251.33	245.243	222.889	195.744		7.21862	0.943769	0.910717	0.949516	0.939736	0.947612	0.913216	0.935624	0.955806	0.923368	0.935906	0.931407	0.954926	0.956039	0.940706	0.938453	0.000216994	0.0147307
7.24442	228.653	287.108	224.873	248.816	257.817	169.629	239.038	242.025	277.007	183.917	263.227	255.941	232.882	210.362		7.24442	216.653	275.108	212.873	236.816	245.817	157.629	227.038	230.025	265.007	171.917	251.227	243.941	220.882	198.362		7.24442	0.940353	0.951906	0.939201	0.970585	0.940572	0.91558	0.961186	0.938435	0.900725	0.919355	0.931025	0.949856	0.94743	0.953287	0.939964	0.000346471	0.0186137
7.28283	230.216	280.062	231.789	246.265	260.33	172.725	231.47	242.295	291.04	180.9	263.876	258.42	233.156	206.218		7.28283	218.216	268.062	219.789	234.265	248.33	160.725	219.47	230.295	279.04	168.9	251.876	246.42	221.156	194.218		7.28283	0.947137	0.927526	0.969714	0.96013	0.950187	0.933563	0.929146	0.939536	0.948421	0.903221	0.93343	0.959509	0.948605	0.933372	0.941678	0.000283373	0.0168337
7.30495	225.685	282.305	230.562	248.856	251.933	178.868	235.662	240.707	291.752	190.15	271.028	254.02	225.53	204.883		7.30495	213.685	270.305	218.562	236.856	239.933	166.868	223.662	228.707	279.752	178.15	259.028	242.02	213.53	192.883		7.30495	0.927471	0.935287	0.964301	0.970749	0.918058	0.969244	0.946894	0.933058	0.950841	0.952687	0.959935	0.942376	0.915895	0.926956	0.943839	0.000336458	0.0183428
7.34336	227.955	276.517	232.394	242.154	256.389	175.413	233.23	241.685	294.616	186.246	264.049	250.54	237.134	209.599		7.34336	215.955	264.517	220.394	230.154	244.389	163.413	221.23	229.685	282.616	174.246	252.049	238.54	225.134	197.599		7.34336	0.937324	0.91526	0.972384	0.943281	0.935108	0.949176	0.936597	0.937048	0.960576	0.931809	0.934071	0.928826	0.965668	0.94962	0.942625	0.000239424	0.0154733
7.37101	227.771	287.007	229.885	238.853	259.844	174.481	235.512	239.829	292.643	192.277	268.866	256.683	235.547	206.641		7.37101	215.771	275.007	217.885	226.853	247.844	162.481	223.512	227.829	280.643	180.277	256.866	244.683	223.547	194.641		7.37101	0.936525	0.951557	0.961314	0.929752	0.948328	0.943762	0.946259	0.929476	0.95387	0.964061	0.951923	0.952746	0.958861	0.935405	0.947417	0.000124692	0.0111665
7.40942	228.536	281.877	233.665	240.157	260.164	174.397	231.946	238.971	295.675	187.804	264.662	255.437	231.475	207.186		7.40942	216.536	269.877	221.665	228.157	248.164	162.397	219.946	226.971	283.675	175.804	252.662	243.437	219.475	195.186		7.40942	0.939845	0.933806	0.977991	0.935096	0.949552	0.943275	0.931162	0.925975	0.964175	0.940141	0.936343	0.947894	0.941395	0.938024	0.943191	0.000185075	0.0136042
7.43154	229.052	282.91	225.714	246.224	253.705	175.121	235.776	236.134	291.484	191.524	269.923	251.597	235.328	213.054		7.43154	217.052	270.91	213.714	234.224	241.705	163.121	223.776	224.134	279.484	179.524	257.923	239.597	223.328	201.054		7.43154	0.942085	0.93738	0.942911	0.959962	0.924838	0.94748	0.947376	0.914401	0.94993	0.960034	0.95584	0.932942	0.957922	0.966224	0.945666	0.000213373	0.0146073
7.46995	233.354	287.157	228.883	239.428	258.073	176.268	237.109	241.578	287.871	185.801	267.583	258.83	231.548	209.198		7.46995	221.354	275.157	216.883	227.428	246.073	164.268	225.109	229.578	275.871	173.801	255.583	246.83	219.548	197.198		7.46995	0.960757	0.952076	0.956893	0.932108	0.941551	0.954142	0.95302	0.936611	0.93765	0.92943	0.947168	0.961106	0.941708	0.947693	0.946565	0.000106191	0.0103049
7.49575	233.09	285.366	232.631	243.14	262.733	171.553	235.269	239.045	288.033	186.122	264.659	257.285	230.276	208.435		7.49575	221.09	273.366	220.631	231.14	250.733	159.553	223.269	227.045	276.033	174.122	252.659	245.285	218.276	196.435		7.49575	0.959611	0.945879	0.973429	0.947322	0.959382	0.926755	0.94523	0.926277	0.938201	0.931146	0.936332	0.95509	0.936252	0.944026	0.944638	0.0001853	0.0136125
7.53416	226.435	278.561	227.999	248.69	262.95	173.723	234.505	240.771	291.541	192.199	262.207	255.25	238.428	210.868		7.53416	214.435	266.561	215.999	236.69	250.95	161.723	222.505	228.771	279.541	180.199	250.207	243.25	226.428	198.868		7.53416	0.930726	0.922332	0.952993	0.970068	0.960212	0.93936	0.941995	0.933319	0.950124	0.963644	0.927245	0.947166	0.971219	0.955719	0.94758	0.000247805	0.0157418
7.55628	228.356	282.819	228.775	245.19	260.528	170.926	232.642	238.29	291.178	190.519	265.527	257.134	237.516	214.644		7.55628	216.356	270.819	216.775	233.19	248.528	158.926	220.642	226.29	279.178	178.519	253.527	245.134	225.516	202.644		7.55628	0.939064	0.937066	0.956416	0.955724	0.950945	0.923113	0.934108	0.923197	0.94889	0.95466	0.939549	0.954502	0.967307	0.973866	0.947029	0.000227194	0.0150729
7.59469	226.261	280.992	226.206	245.383	252.887	169.974	232.312	241.106	290.164	184.809	265.502	255.965	233.695	213.809		7.59469	214.261	268.992	214.206	233.383	240.887	157.974	220.312	229.106	278.164	172.809	253.502	243.965	221.695	201.809		7.59469	0.929971	0.930744	0.945082	0.956515	0.921708	0.917584	0.932711	0.934685	0.945444	0.924125	0.939456	0.94995	0.950917	0.969853	0.939196	0.000214274	0.0146381
7.62049	226.652	287.254	227.936	247.328	261.708	180.421	230.284	240.499	297.581	191.013	270.374	250.556	231.535	208.861		7.62049	214.652	275.254	215.936	235.328	249.708	168.421	218.284	228.499	285.581	179.013	258.374	238.556	219.535	196.861		7.62049	0.931668	0.952411	0.952715	0.964486	0.95546	0.978265	0.924125	0.932209	0.970653	0.957302	0.957511	0.928888	0.941652	0.946074	0.94953	0.000264447	0.0162618
7.6589	230.836	281.187	232.085	243.129	259.437	175.131	241.82	237.794	300.811	190.084	262.08	253.399	233.184	212.426		7.6589	218.836	269.187	220.085	231.129	247.437	163.131	229.82	225.794	288.811	178.084	250.08	241.399	221.184	200.426		7.6589	0.949828	0.931419	0.97102	0.947277	0.94677	0.947538	0.972964	0.921173	0.981632	0.952334	0.926774	0.939958	0.948725	0.963206	0.950044	0.00030705	0.0175228
7.68102	224.567	279.007	228.575	245.738	263.019	174.79	232.489	235.669	294.037	188.528	267.95	254.841	230.899	212.83		7.68102	212.567	267.007	216.575	233.738	251.019	162.79	220.489	223.669	282.037	176.528	255.95	242.841	218.899	200.83		7.68102	0.922619	0.923876	0.955534	0.95797	0.960476	0.945557	0.93346	0.912504	0.958608	0.944013	0.948528	0.945573	0.938924	0.965148	0.943771	0.000251995	0.0158743
7.71943	229.284	275.599	229.333	246.26	259.143	175.641	233.839	244.072	292.03	187.602	271.145	258.494	234.754	212.551		7.71943	217.284	263.599	217.333	234.26	247.143	163.641	221.839	232.072	280.03	175.602	259.145	246.494	222.754	200.551		7.71943	0.943092	0.912084	0.958878	0.960109	0.945645	0.9505	0.939176	0.946786	0.951786	0.939061	0.960368	0.959797	0.95546	0.963807	0.949039	0.000180536	0.0134364
7.74523	235.603	286.624	231.967	244.254	259.015	173.417	233.524	238.203	294.122	181.045	266.209	257.533	228.881	210.637		7.74523	223.603	274.624	219.967	232.254	247.015	161.417	221.524	226.203	282.122	169.045	254.209	245.533	216.881	198.637		7.74523	0.970519	0.950231	0.9705	0.951888	0.945155	0.937582	0.937842	0.922842	0.958897	0.903996	0.942076	0.956055	0.930269	0.954609	0.945176	0.000329816	0.0181608
7.78364	232.511	273.129	226.383	244.577	253.83	173.823	235.405	241.964	295.067	186.5	263.183	251.163	234.968	204.491		7.78364	220.511	261.129	214.383	232.577	241.83	161.823	223.405	229.964	283.067	174.5	251.183	239.163	222.968	192.491		7.78364	0.957098	0.903537	0.945863	0.953211	0.925316	0.93994	0.945806	0.938186	0.962108	0.933168	0.930862	0.931252	0.956378	0.925072	0.939128	0.00025072	0.0158341
7.80576	224.958	283.22	230.126	243.912	254.161	172.037	233.037	240.844	289.74	191.951	257.207	257.775	231.456	213.941		7.80576	212.958	271.22	218.126	231.912	242.161	160.037	221.037	228.844	277.74	179.951	245.207	245.775	219.456	201.941		7.80576	0.924316	0.938453	0.962377	0.950486	0.926583	0.929567	0.93578	0.933617	0.944003	0.962318	0.908715	0.956998	0.941313	0.970487	0.941787	0.00029806	0.0172644
7.84417	228.52	282.628	230.616	238.447	255.1	176.428	239.618	239.461	294.281	184.882	265.365	254.113	231.196	211.23		7.84417	216.52	270.628	218.616	226.447	243.1	164.428	227.618	227.461	282.281	172.882	253.365	242.113	219.196	199.23		7.84417	0.939776	0.936405	0.964539	0.928088	0.930176	0.955071	0.963642	0.927974	0.959437	0.924515	0.938948	0.942739	0.940198	0.957459	0.943498	0.000195693	0.013989
7.86997	224.304	277.592	224.911	249.509	256.201	173.304	229.128	239.744	298.683	186.823	264.212	257.036	229.658	204.651		7.86997	212.304	265.592	212.911	237.509	244.201	161.304	217.128	227.744	286.683	174.823	252.212	245.036	217.658	192.651		7.86997	0.921477	0.91898	0.939368	0.973425	0.934388	0.936926	0.919231	0.929129	0.974399	0.934895	0.934675	0.95412	0.933601	0.925841	0.93789	0.000316092	0.017779
7.90838	230.845	281.51	227.156	242.024	252.731	170.467	233.723	242.644	294.065	182.855	268.613	251.568	228.608	212.758		7.90838	218.845	269.51	215.156	230.024	240.731	158.467	221.723	230.644	282.065	170.855	256.613	239.568	216.608	200.758		7.90838	0.949867	0.932536	0.949273	0.942748	0.921111	0.920447	0.938685	0.94096	0.958703	0.913676	0.950985	0.932829	0.929098	0.964802	0.93898	0.000224821	0.014994
7.9305	231.462	281.343	228.905	240.434	258.376	176.7	234.92	237.045	296.891	189.474	263.806	257.259	230.82	215.556		7.9305	219.462	269.343	216.905	228.434	246.376	164.7	222.92	225.045	284.891	177.474	251.806	245.259	218.82	203.556		7.9305	0.952545	0.931958	0.95699	0.936231	0.94271	0.956651	0.943752	0.918118	0.968308	0.949072	0.933171	0.954988	0.938585	0.978248	0.947238	0.000245301	0.0156621
7.96891	237.766	277.945	224.542	249.151	256.069	174.526	230.801	250.321	291.081	188.086	266.361	253.229	230.88	211.25		7.96891	225.766	265.945	212.542	237.151	244.069	162.526	218.801	238.321	279.081	176.086	254.361	241.229	218.88	199.25		7.96891	0.979907	0.920201	0.93774	0.971958	0.933883	0.944024	0.926314	0.97228	0.948561	0.941649	0.942639	0.939296	0.938843	0.957555	0.946775	0.000311096	0.0176379
7.99472	232.515	277.236	227.632	240.279	248.831	175.725	232.321	232.366	295.296	188.906	266.499	258.65	231.63	216.633		7.99472	220.515	265.236	215.632	228.279	236.831	163.725	220.321	220.366	283.296	176.906	254.499	246.65	219.63	204.633		7.99472	0.957116	0.917748	0.951373	0.935596	0.906188	0.950988	0.932749	0.899029	0.962887	0.946034	0.943151	0.960405	0.94206	0.983424	0.942053	0.000519186	0.0227857
8.03313	234.062	280.574	231.28	245.592	256.855	167.613	239.522	239.719	292.764	186.249	267.251	254.478	237.077	206.68		8.03313	222.062	268.574	219.28	233.592	244.855	155.613	227.522	227.719	280.764	174.249	255.251	242.478	225.077	194.68		8.03313	0.96383	0.929298	0.967469	0.957371	0.936891	0.90387	0.963235	0.929027	0.954281	0.931826	0.945938	0.94416	0.965424	0.935592	0.944872	0.000336217	0.0183362
8.05524	229.196	276.955	226.633	240.318	257.003	177.768	231.992	242.78	289.526	184.279	266.628	256.713	235.442	205.161		8.05524	217.196	264.955	214.633	228.318	245.003	165.768	219.992	230.78	277.526	172.279	254.628	244.713	223.442	193.161		8.05524	0.94271	0.916775	0.946966	0.935756	0.937457	0.962855	0.931356	0.941515	0.943275	0.921291	0.943629	0.952862	0.958411	0.928292	0.940225	0.000171828	0.0131083
8.09365	227.279	279.817	232.886	250.709	252.969	175.92	234.447	239.929	298.192	184.449	260.308	256.136	230.383	215.499		8.09365	215.279	267.817	220.886	238.709	240.969	163.92	222.447	227.929	286.192	172.449	248.308	244.136	218.383	203.499		8.09365	0.93439	0.926678	0.974554	0.978343	0.922022	0.952121	0.94175	0.929884	0.97273	0.9222	0.920207	0.950616	0.936711	0.977975	0.945727	0.000487301	0.0220749
8.11946	234.489	278.853	230.472	240.358	265.276	180.441	232.413	245.955	285.364	188.06	260.261	257.308	229.388	211.919		8.11946	222.489	266.853	218.472	228.358	253.276	168.441	220.413	233.955	273.364	176.06	248.261	245.308	217.388	199.919		8.11946	0.965684	0.923343	0.963904	0.93592	0.969112	0.978381	0.933139	0.954468	0.929129	0.94151	0.920033	0.955179	0.932443	0.96077	0.947358	0.000352474	0.0187743
8.15787	228.2	283.97	228.979	244.716	264.402	173.071	236.252	242.781	290.402	186.173	261.434	256.165	236.583	215.288		8.15787	216.2	271.97	216.979	232.716	252.402	161.071	224.252	230.781	278.402	174.173	249.434	244.165	224.583	203.288		8.15787	0.938387	0.941048	0.957316	0.953781	0.965768	0.935573	0.949391	0.941519	0.946253	0.931419	0.92438	0.950729	0.963305	0.976961	0.948274	0.000206942	0.0143855
8.17998	224.232	283.164	230.002	242.537	260.234	174.577	236.086	242.366	278.45	194.577	264.016	259.624	231.892	216.401		8.17998	212.232	271.164	218.002	230.537	248.234	162.577	224.086	230.366	266.45	182.577	252.016	247.624	219.892	204.401		8.17998	0.921165	0.938259	0.96183	0.944851	0.94982	0.94432	0.948689	0.939826	0.905629	0.976361	0.933949	0.964197	0.943184	0.982309	0.946742	0.000410609	0.0202635
8.2184	234.19	278.408	226.77	240.112	262.174	176.418	237.545	240.6	292.489	183.786	259.823	256.873	231.985	213.008		8.2184	222.19	266.408	214.77	228.112	250.174	164.418	225.545	228.6	280.489	171.786	247.823	244.873	219.985	201.008		8.2184	0.964386	0.921803	0.94757	0.934912	0.957243	0.955013	0.954865	0.932621	0.953346	0.918654	0.91841	0.953485	0.943583	0.966003	0.944421	0.000269558	0.0164182
8.24604	233.036	279.287	227.327	245.746	260.197	171.597	237.591	237.126	292.909	185.984	265.45	254.064	231.889	209.917		8.24604	221.036	267.287	215.327	233.746	248.197	159.597	225.591	225.126	280.909	173.984	253.45	242.064	219.889	197.917		8.24604	0.959377	0.924844	0.950028	0.958003	0.949678	0.927011	0.95506	0.918448	0.954774	0.930408	0.939263	0.942548	0.943171	0.951149	0.943126	0.000176795	0.0132964
8.28445	229.993	284.05	230.991	244.472	262.339	168.004	237.131	242.015	294.894	192.304	266.466	255.837	234.973	207.87		8.28445	217.993	272.05	218.991	232.472	250.339	156.004	225.131	230.015	282.894	180.304	254.466	243.837	222.973	195.87		8.28445	0.946169	0.941325	0.966193	0.952781	0.957874	0.906141	0.953113	0.938394	0.96152	0.964206	0.943028	0.949451	0.956399	0.941311	0.948422	0.000227299	0.0150765
8.30657	230.182	291.191	227.895	243.365	249.269	177.796	231.031	235.183	290.106	188.593	270.578	254.106	236.217	210.268		8.30657	218.182	279.191	215.895	231.365	237.269	165.796	219.031	223.183	278.106	176.593	258.578	242.106	224.217	198.268		8.30657	0.94699	0.966034	0.952534	0.948244	0.907864	0.963017	0.927288	0.910521	0.945247	0.94436	0.958267	0.942711	0.961735	0.952835	0.944832	0.000326356	0.0180653
8.34498	226.435	282.562	228.358	248.642	265.694	177.633	233.774	246.19	292.262	189.594	260.496	250.958	231.709	217.644		8.34498	214.435	270.562	216.358	236.642	253.694	165.633	221.774	234.19	280.262	177.594	248.496	238.958	219.709	205.644		8.34498	0.930726	0.936176	0.954577	0.969872	0.970711	0.962071	0.938901	0.955427	0.952575	0.949713	0.920904	0.930454	0.942399	0.988283	0.950199	0.000343374	0.0185304
8.37078	224.445	281.202	230.56	243.065	261.701	176.564	232.616	239.322	293.696	192.723	266.52	259.512	227.565	213.376		8.37078	212.445	269.202	218.56	231.065	249.701	164.564	220.616	227.322	281.696	180.723	254.52	247.512	215.565	201.376		8.37078	0.922089	0.931471	0.964292	0.947015	0.955433	0.955861	0.933998	0.927407	0.957449	0.966446	0.943229	0.963761	0.924624	0.967772	0.947203	0.000275183	0.0165886
8.40919	226.957	280.904	220.648	244.955	258.453	174.727	233.467	242.624	288.23	188.066	264.804	256.48	231.045	213.196		8.40919	214.957	268.904	208.648	232.955	246.453	162.727	221.467	230.624	276.23	176.066	252.804	244.48	219.045	201.196		8.40919	0.932992	0.930439	0.92056	0.954761	0.943005	0.945191	0.937601	0.940878	0.93887	0.941542	0.936869	0.951955	0.939551	0.966907	0.941509	0.000125193	0.011189
8.43131	230.535	279.034	229.307	241.653	265.257	177.007	230.206	243.644	291.467	190.158	264.274	257.075	239.293	210.373		8.43131	218.535	267.034	217.307	229.653	253.257	165.007	218.206	231.644	279.467	178.158	252.274	245.075	227.293	198.373		8.43131	0.948522	0.923969	0.958764	0.941228	0.969039	0.958435	0.923795	0.94504	0.949873	0.95273	0.934905	0.954272	0.974929	0.95334	0.949203	0.000219674	0.0148214
8.46972	224.216	278.597	224.101	242.159	260.36	171.094	232.247	244.749	290.536	182.666	271.321	250.835	231.984	211.444		8.46972	212.216	266.597	212.101	230.159	248.36	159.094	220.247	232.749	278.536	170.666	259.321	238.835	219.984	199.444		8.46972	0.921095	0.922457	0.935795	0.943301	0.950302	0.924089	0.932436	0.949548	0.946708	0.912665	0.961021	0.929975	0.943578	0.958487	0.937961	0.000217874	0.0147606
8.49553	219.414	274.14	228.178	242.463	259.437	176.464	234.441	243.82	287.712	184.517	268.365	264.675	234.446	212.287		8.49553	207.414	262.14	216.178	230.463	247.437	164.464	222.441	231.82	275.712	172.517	256.365	252.675	222.446	200.287		8.49553	0.900253	0.907035	0.953782	0.944547	0.94677	0.955281	0.941724	0.945758	0.93711	0.922563	0.950066	0.983865	0.954139	0.962538	0.943245	0.000468531	0.0216456
8.53394	229.434	277.308	232.439	245.172	262.586	174.469	228.42	246.06	295.717	185.1	267.878	259.601	236.408	213.059		8.53394	217.434	265.308	220.439	233.172	250.586	162.469	216.42	234.06	283.717	173.1	255.878	247.601	224.408	201.059		8.53394	0.943743	0.917997	0.972582	0.95565	0.958819	0.943693	0.916234	0.954896	0.964318	0.925681	0.948261	0.964108	0.962554	0.966248	0.949627	0.000331157	0.0181977
8.55605	226.656	271.93	224.313	247.986	264.577	169.594	231.993	241.771	290.304	181.074	268.768	248.926	236.575	210.327		8.55605	214.656	259.93	212.313	235.986	252.577	157.594	219.993	229.771	278.304	169.074	256.768	236.926	224.575	198.327		8.55605	0.931686	0.899388	0.93673	0.967183	0.966437	0.915377	0.931361	0.937398	0.94592	0.904151	0.951559	0.922541	0.96327	0.953119	0.93758	0.00048038	0.0219176
8.59446	229.428	283.073	228.46	242.817	263.987	174.411	230.326	246.559	291.531	182.307	262.783	256.305	235.799	207.311		8.59446	217.428	271.073	216.46	230.817	251.987	162.411	218.326	234.559	279.531	170.307	250.783	244.305	223.799	195.311		8.59446	0.943717	0.937944	0.955027	0.945998	0.96418	0.943356	0.924303	0.956932	0.95009	0.910745	0.92938	0.951274	0.959942	0.938625	0.943679	0.000216648	0.014719
8.62027	230.565	276.593	230.701	243.641	260.783	175.843	229.46	234.477	298.48	189.094	266.013	265.502	232.247	213.887		8.62027	218.565	264.593	218.701	231.641	248.783	163.843	217.46	222.477	286.48	177.094	254.013	253.502	220.247	201.887		8.62027	0.948652	0.915523	0.964914	0.949375	0.95192	0.951674	0.920637	0.907641	0.973709	0.94704	0.94135	0.987085	0.944706	0.970228	0.948175	0.000499064	0.0223397
8.65868	228.824	277.258	226.479	240.799	264.146	173.861	230.849	244.557	294.35	191.83	268.471	249.912	233.081	216.288		8.65868	216.824	265.258	214.479	228.799	252.146	161.861	218.849	232.557	282.35	179.83	256.471	237.912	221.081	204.288		8.65868	0.941095	0.917824	0.946286	0.937727	0.964788	0.940161	0.926517	0.948765	0.959672	0.961671	0.950459	0.926381	0.948284	0.981766	0.946528	0.000290661	0.0170488
8.68079	224.753	274.181	227.851	246.924	258.337	175.366	231.733	239.448	284.135	183.942	267.78	256.452	235.695	212.271		8.68079	212.753	262.181	215.851	234.924	246.337	163.366	219.733	227.448	272.135	171.942	255.78	244.452	223.695	200.271		8.68079	0.923426	0.907177	0.95234	0.962831	0.942561	0.948903	0.93026	0.927921	0.924952	0.919488	0.947898	0.951846	0.959496	0.962461	0.940111	0.000314342	0.0177297
8.71921	229.092	277.028	232.187	242.426	259.402	176.77	228.243	241.484	296.354	188.911	264.709	256.125	235.794	208.882		8.71921	217.092	265.028	220.187	230.426	247.402	164.77	216.243	229.484	284.354	176.911	252.709	244.125	223.794	196.882		8.71921	0.942259	0.917028	0.97147	0.944396	0.946636	0.957058	0.915485	0.936228	0.966483	0.946061	0.936517	0.950573	0.95992	0.946175	0.945449	0.000259539	0.0161102
8.74501	232.915	278.827	229.618	238.42	255.456	173.15	238.231	241.441	290.95	186.421	270.009	255.284	229.932	219.413		8.74501	220.915	266.827	217.618	226.42	243.456	161.15	226.231	229.441	278.95	174.421	258.009	243.284	217.932	207.413		8.74501	0.958852	0.923253	0.960136	0.927977	0.931538	0.936031	0.95777	0.936052	0.948115	0.932745	0.956158	0.947298	0.934777	0.996784	0.946249	0.000364805	0.0190999
8.78342	232.158	281.365	230.036	242.65	266.445	178.496	230.584	241.14	293.205	184.347	270.234	256.8	227.343	217.023		8.78342	220.158	269.365	218.036	230.65	254.445	166.496	218.584	229.14	281.205	172.347	258.234	244.8	215.343	205.023		8.78342	0.955566	0.932035	0.96198	0.945314	0.973585	0.967083	0.925395	0.934824	0.95578	0.921654	0.956992	0.953201	0.923672	0.985299	0.949456	0.000387235	0.0196783
8.80554	226.007	281.233	232.093	247.491	256.847	172.941	229.094	239.662	288.563	183.059	265.933	259.449	237.971	213.673		8.80554	214.007	269.233	220.093	235.491	244.847	160.941	217.094	227.662	276.563	171.059	253.933	247.449	225.971	201.673		8.80554	0.928869	0.931578	0.971055	0.965154	0.93686	0.934817	0.919087	0.928794	0.940002	0.914766	0.941053	0.963516	0.969258	0.969199	0.943858	0.000390981	0.0197732
8.84395	237.427	276.311	227.548	242.717	258.749	176.21	233.576	247.032	291.914	189.249	269.4	252.659	236.243	213.239		8.84395	225.427	264.311	215.548	230.717	246.749	164.21	221.576	235.032	279.914	177.249	257.4	240.659	224.243	201.239		8.84395	0.978436	0.914547	0.951003	0.945588	0.944138	0.953805	0.938062	0.958862	0.951392	0.947869	0.953902	0.937077	0.961846	0.967113	0.95026	0.000228986	0.0151323
8.86975	229.11	285.453	228.165	240.971	262.741	175.321	231.786	239.8	290.463	184.258	264.536	255.155	236.091	209.318		8.86975	217.11	273.453	216.165	228.971	250.741	163.321	219.786	227.8	278.463	172.258	252.536	243.155	224.091	197.318		8.86975	0.942337	0.94618	0.953725	0.938432	0.959412	0.948642	0.930484	0.929357	0.94646	0.921178	0.935876	0.946796	0.961194	0.94827	0.943453	0.000130742	0.0114343
8.90816	228.536	283.957	231.789	244.034	257.274	173.732	230.184	238.609	291.328	186.931	265.715	257.606	236.43	212.652		8.90816	216.536	271.957	219.789	232.034	245.274	161.732	218.184	226.609	279.328	174.931	253.715	245.606	224.43	200.652		8.90816	0.939845	0.941003	0.969714	0.950986	0.938494	0.939412	0.923702	0.924498	0.9494	0.935473	0.940245	0.95634	0.962648	0.964292	0.945432	0.000198386	0.014085
8.93028	227.562	284.669	227.618	246.445	257.018	173.161	229.334	242.822	288.504	177.159	267.057	249.594	232.742	212.981		8.93028	215.562	272.669	215.618	234.445	245.018	161.161	217.334	230.822	276.504	165.159	255.057	237.594	220.742	200.981		8.93028	0.935618	0.943467	0.951312	0.960867	0.937514	0.936095	0.920103	0.941686	0.939802	0.883215	0.945219	0.925142	0.94683	0.965874	0.938053	0.000396178	0.0199042
8.96869	225.204	279.369	228.484	245.575	255.863	172.815	237.889	244.4	288.658	188.469	266.721	255.747	232.324	206.785		8.96869	213.204	267.369	216.484	233.575	243.863	160.815	225.889	232.4	276.658	176.469	254.721	243.747	220.324	194.785		8.96869	0.925383	0.925128	0.955133	0.957302	0.933095	0.934086	0.956322	0.948124	0.940325	0.943697	0.943973	0.949101	0.945037	0.936097	0.942343	0.000111874	0.010577
8.99449	227.438	279.173	227.586	243.58	267.686	172.95	234.963	238.542	292.247	185.575	268.601	256.387	234.537	210.756		8.99449	215.438	267.173	215.586	231.58	255.686	160.95	222.963	226.542	280.247	173.575	256.601	244.387	222.537	198.756		8.99449	0.93508	0.92445	0.951171	0.949125	0.978333	0.93487	0.943934	0.924225	0.952524	0.928221	0.950941	0.951593	0.954529	0.955181	0.945298	0.000217875	0.0147606
9.0329	229.064	281.379	228.373	242.79	260.081	178.357	233.765	245.217	300.775	190.031	266.46	256.609	229.256	209.919		9.0329	217.064	269.379	216.373	230.79	248.081	166.357	221.765	233.217	288.775	178.031	254.46	244.609	217.256	197.919		9.0329	0.942137	0.932083	0.954643	0.945887	0.949234	0.966276	0.938862	0.951457	0.981509	0.95205	0.943006	0.952457	0.931877	0.951158	0.949474	0.000168529	0.0129819
9.05502	234.092	281.762	225.205	242.074	259.906	168.745	234.269	241.939	291.226	190.533	264.051	252.25	232.327	211.587		9.05502	222.092	269.762	213.205	230.074	247.906	156.745	222.269	229.939	279.226	178.533	252.051	240.25	220.327	199.587		9.05502	0.963961	0.933408	0.940665	0.942953	0.948565	0.910445	0.940996	0.938084	0.949053	0.954735	0.934079	0.935484	0.945049	0.959174	0.942618	0.000171535	0.0130971
9.09343	231.488	277.709	236.846	238.907	259.365	170.834	231.959	241.256	294.495	188.309	265.746	255.506	233.149	208.659		9.09343	219.488	265.709	224.846	226.907	247.365	158.834	219.959	229.256	282.495	176.309	253.746	243.506	221.149	196.659		9.09343	0.952658	0.919384	0.992026	0.929973	0.946495	0.922579	0.931217	0.935297	0.960164	0.942842	0.94036	0.948163	0.948575	0.945103	0.943917	0.000323355	0.0179821
9.12108	228.062	284.662	234.658	245.362	256.055	174.359	236.38	240.575	293.109	186.712	268.551	249.448	238.003	212.203		9.12108	216.062	272.662	222.658	233.362	244.055	162.359	224.38	228.575	281.109	174.712	256.551	237.448	226.003	200.203		9.12108	0.937788	0.943443	0.982372	0.956429	0.93383	0.943054	0.949933	0.932519	0.955454	0.934302	0.950755	0.924574	0.969396	0.962135	0.948284	0.000254016	0.0159379
9.15949	228.389	285.902	225.453	238.471	260.191	177.73	231.134	235.355	291.345	190.935	269.072	263.28	235.714	209.289		9.15949	216.389	273.902	213.453	226.471	248.191	165.73	219.134	223.355	279.345	178.935	257.072	251.28	223.714	197.289		9.15949	0.939207	0.947733	0.94176	0.928186	0.949655	0.962634	0.927724	0.911223	0.949458	0.956885	0.952686	0.978433	0.959577	0.948131	0.946664	0.000279055	0.0167049
9.1816	234.412	288.02	229.557	245.078	258.24	173.397	230.315	236.542	293.726	184.469	265.532	255.673	237.628	209.87		9.1816	222.412	276.02	217.557	233.078	246.24	161.397	218.315	224.542	281.726	172.469	253.532	243.673	225.628	197.87		9.1816	0.965349	0.955062	0.959867	0.955265	0.94219	0.937466	0.924257	0.916066	0.957551	0.922307	0.939567	0.948813	0.967787	0.950923	0.945891	0.000264127	0.016252
9.22002	224.669	285.262	234.724	245.351	262.371	168.122	232.164	243.839	294.171	185.927	263.061	254.501	227.863	212.119		9.22002	212.669	273.262	222.724	233.351	250.371	156.122	220.164	231.839	282.171	173.927	251.061	242.501	215.863	200.119		9.22002	0.923061	0.945519	0.982664	0.956384	0.957997	0.906827	0.932084	0.945835	0.959063	0.930104	0.93041	0.944249	0.925902	0.961731	0.942988	0.000388033	0.0196985
9.24582	224.071	282.288	233.46	246.093	260.77	174.465	234.141	234.942	280.563	182.583	268.98	254.907	232.618	207.208		9.24582	212.071	270.288	221.46	234.093	248.77	162.465	222.141	222.942	268.563	170.583	256.98	242.907	220.618	195.208		9.24582	0.920466	0.935228	0.977087	0.959425	0.951871	0.943669	0.940454	0.909538	0.912811	0.912221	0.952345	0.94583	0.946298	0.93813	0.938955	0.000381906	0.0195424
9.28423	226.474	289.985	233.621	248.549	258.899	168.683	233.77	238.221	292.334	184.402	263.39	253.21	237.642	210.031		9.28423	214.474	277.985	221.621	236.549	246.899	156.683	221.77	226.221	280.334	172.402	251.39	241.21	225.642	198.031		9.28423	0.930896	0.961861	0.977797	0.969491	0.944712	0.910085	0.938884	0.922915	0.952819	0.921948	0.931629	0.939222	0.967847	0.951696	0.944414	0.000405357	0.0201335
9.30635	228.542	287.373	230.259	247.142	256.773	169.059	234.101	248.984	297.819	184.244	273.199	250.572	235.174	210.467		9.30635	216.542	275.373	218.259	235.142	244.773	157.059	222.101	236.984	285.819	172.244	261.199	238.572	223.174	198.467		9.30635	0.939871	0.952823	0.962964	0.963724	0.936577	0.912269	0.940285	0.966825	0.971462	0.921103	0.96798	0.928951	0.957261	0.953792	0.948278	0.00034891	0.0186791
9.34476	227.473	292.055	228.999	243.452	258.218	171.924	233.278	242.878	297.509	188.32	266.965	255.526	237.997	209.968		9.34476	215.473	280.055	216.999	231.452	246.218	159.924	221.278	230.878	285.509	176.32	254.965	243.526	225.997	197.968		9.34476	0.935232	0.969023	0.957405	0.948601	0.942106	0.92891	0.936801	0.941915	0.970409	0.942901	0.944878	0.94824	0.96937	0.951394	0.949084	0.000172701	0.0131416
9.37056	221.166	285.667	230.274	247.054	256.365	172.771	236.348	238.205	294.824	194.536	273.193	251.761	233.908	212.727		9.37056	209.166	273.667	218.274	235.054	244.365	160.771	224.348	226.205	282.824	182.536	261.193	239.761	221.908	200.727		9.37056	0.907857	0.94692	0.96303	0.963363	0.935016	0.93383	0.949798	0.92285	0.961283	0.976142	0.967958	0.93358	0.951831	0.964653	0.948436	0.000380281	0.0195008
9.40897	222.659	275.759	229.993	239.024	262.336	176.261	234.734	245.873	295.663	188.214	268.742	252.354	235.313	206.984		9.40897	210.659	263.759	217.993	227.024	250.336	164.261	222.734	233.873	283.663	176.214	256.742	240.354	223.313	194.984		9.40897	0.914337	0.912637	0.96179	0.930453	0.957863	0.954101	0.942965	0.954133	0.964134	0.942334	0.951463	0.935889	0.957857	0.937053	0.944072	0.000271643	0.0164816
9.43109	227.199	286.909	224.675	243.604	259.427	173.15	230.918	237.972	295.023	190.74	265.177	258.789	235.281	212.104		9.43109	215.199	274.909	212.675	231.604	247.427	161.15	218.918	225.972	283.023	178.74	253.177	246.789	223.281	200.104		9.43109	0.934042	0.951217	0.938327	0.949224	0.946732	0.936031	0.926809	0.9219	0.961959	0.955842	0.938251	0.960946	0.95772	0.961659	0.945761	0.000177325	0.0133163
9.4695	227.902	287.481	223.752	243.747	262.051	174.746	234.557	239.944	297.216	184.959	263.228	252.163	241.586	204.148		9.4695	215.902	275.481	211.752	231.747	250.051	162.746	222.557	227.944	285.216	172.959	251.228	240.163	229.586	192.148		9.4695	0.937094	0.953197	0.934255	0.94981	0.956772	0.945302	0.942215	0.929945	0.969413	0.924927	0.931029	0.935146	0.984764	0.923424	0.944092	0.000305212	0.0174703
9.4953	227.519	286.47	228.971	237.984	259.034	175.823	239.019	238.273	289.386	183.305	270.183	256.115	232.794	211.22		9.4953	215.519	274.47	216.971	225.984	247.034	163.823	227.019	226.273	277.386	171.305	258.183	244.115	220.794	199.22		9.4953	0.935431	0.949698	0.957281	0.92619	0.945228	0.951557	0.961106	0.923128	0.942799	0.916082	0.956803	0.950534	0.947053	0.957411	0.944307	0.000197051	0.0140375
9.53371	230.144	280.509	236.512	238.321	265.994	173.785	230.66	237.669	287.138	181.707	262.316	254.933	235.416	217.164		9.53371	218.144	268.509	224.512	226.321	253.994	161.785	218.66	225.669	275.138	169.707	250.316	242.933	223.416	205.164		9.53371	0.946825	0.929073	0.990552	0.927571	0.971859	0.93972	0.925717	0.920663	0.935159	0.907536	0.927649	0.945931	0.958299	0.985976	0.943752	0.000614276	0.0247846
9.55583	227.797	281.227	226.577	237.412	263.883	179.2	235.554	241.692	299.041	181.204	258.521	259.807	232.57	209.988		9.55583	215.797	269.227	214.577	225.412	251.883	167.2	223.554	229.692	287.041	169.204	246.521	247.807	220.57	197.988		9.55583	0.936638	0.931557	0.946719	0.923846	0.963782	0.971172	0.946436	0.937076	0.975616	0.904847	0.913585	0.96491	0.946092	0.95149	0.94384	0.000443162	0.0210514
9.59424	227.153	280.948	227.995	243.403	257.957	172.752	233.927	241.644	291.211	185.083	264.412	257.235	232.737	207.822		9.59424	215.153	268.948	215.995	231.403	245.957	160.752	221.927	229.644	279.211	173.083	252.412	245.235	220.737	195.822		9.59424	0.933843	0.930592	0.952975	0.9484	0.941107	0.93372	0.939548	0.93688	0.949002	0.92559	0.935416	0.954895	0.946808	0.94108	0.940704	7.60058e-05	0.00871813
9.62004	225.234	281.697	230.011	238.632	259.59	176.642	232.277	235.627	298.391	188.179	265.674	262.345	233.564	212.161		9.62004	213.234	269.697	218.011	226.632	247.59	164.642	220.277	223.627	286.391	176.179	253.674	250.345	221.564	200.161		9.62004	0.925514	0.933183	0.96187	0.928846	0.947356	0.956314	0.932563	0.912333	0.973406	0.942147	0.940093	0.974792	0.950355	0.961933	0.945765	0.000342633	0.0185103
9.65845	226.855	286.802	232.284	244.588	256.406	170.524	231.846	238.249	289.302	188.529	263.632	260.892	236.773	207.908		9.65845	214.855	274.802	220.284	232.588	244.406	158.524	219.846	226.249	277.302	176.529	251.632	248.892	224.773	195.908		9.65845	0.932549	0.950847	0.971898	0.953257	0.935173	0.920778	0.930738	0.92303	0.942514	0.944018	0.932526	0.969135	0.96412	0.941494	0.94372	0.000265414	0.0162915
9.68057	224.413	288.846	234.684	245.124	258.456	168.848	235.902	239.676	293.741	191.26	269.508	258.156	238.287	211.474		9.68057	212.413	276.846	222.684	233.124	246.456	156.848	223.902	227.676	281.741	179.26	257.508	246.156	226.287	199.474		9.68057	0.92195	0.95792	0.982487	0.955453	0.943017	0.911043	0.94791	0.928851	0.957602	0.958623	0.954302	0.958481	0.970614	0.958631	0.950492	0.00035933	0.018956
9.71898	225.194	290.234	229.001	241.59	255.651	176.488	234.062	237.966	295.487	187.375	270.357	258.734	231.287	210.444		9.71898	213.194	278.234	217.001	229.59	243.651	164.488	222.062	225.966	283.487	175.375	258.357	246.734	219.287	198.444		9.71898	0.92534	0.962722	0.957414	0.940969	0.932284	0.95542	0.94012	0.921875	0.963536	0.937847	0.957448	0.960732	0.940589	0.953681	0.946427	0.000197177	0.014042
9.74478	227.843	286.211	227.722	240.199	256.808	174.204	235.144	242.799	293.018	189.512	267.727	262.359	235.738	213.26		9.74478	215.843	274.211	215.722	228.199	244.808	162.204	223.144	230.799	281.018	177.512	255.727	250.359	223.738	201.26		9.74478	0.936838	0.948802	0.951771	0.935268	0.936711	0.942153	0.944701	0.941592	0.955144	0.949275	0.947702	0.974847	0.95968	0.967214	0.949407	0.000135887	0.0116571
9.7832	228.613	289.554	229.204	250.112	261.08	167.487	237.185	240.583	292.039	184.938	269.173	260.683	233.565	208.235		9.7832	216.613	277.554	217.204	238.112	249.08	155.487	225.185	228.583	280.039	172.938	257.173	248.683	221.565	196.235		9.7832	0.94018	0.960369	0.958309	0.975897	0.953057	0.903138	0.953341	0.932552	0.951817	0.924815	0.95306	0.968321	0.95036	0.943065	0.947734	0.000340276	0.0184466
9.80531	226.821	282.354	227.272	245.335	262.108	173.246	235.007	238	292.191	188.507	269.595	256.204	234.796	210.533		9.80531	214.821	270.354	215.272	233.335	250.108	161.246	223.007	226	280.191	176.507	257.595	244.204	222.796	198.533		9.80531	0.932402	0.935457	0.949785	0.956318	0.95699	0.936589	0.944121	0.922014	0.952333	0.943901	0.954624	0.95088	0.95564	0.954109	0.946083	0.000115876	0.0107646
9.84372	222.822	287.344	228.884	244.87	263.991	171.039	234.791	238.808	299.113	192.462	268.332	257.652	234.307	211.327		9.84372	210.822	275.344	216.884	232.87	251.991	159.039	222.791	226.808	287.113	180.462	256.332	245.652	222.307	199.327		9.84372	0.915045	0.952723	0.956897	0.954412	0.964195	0.92377	0.943206	0.92531	0.97586	0.965051	0.949944	0.956519	0.953542	0.957925	0.9496	0.000296345	0.0172147
9.86953	228.594	289.576	230.91	246.269	264.074	172.295	236.732	243.185	298.4	191.575	263.672	257.608	234.123	208.764		9.86953	216.594	277.576	218.91	234.269	252.074	160.295	224.732	231.185	286.4	179.575	251.672	245.608	222.123	196.764		9.86953	0.940097	0.960446	0.965836	0.960146	0.964513	0.931065	0.951424	0.943167	0.973437	0.960307	0.932674	0.956347	0.952753	0.945608	0.952701	0.000161498	0.0127082
9.90794	226.27	286.237	228.432	247.771	261.496	174.166	233.332	242.424	295.213	188.489	263.045	253.112	234.145	208.127		9.90794	214.27	274.237	216.432	235.771	249.496	162.166	221.332	230.424	283.213	176.489	251.045	241.112	222.145	196.127		9.90794	0.93001	0.948892	0.954903	0.966302	0.954649	0.941933	0.937029	0.940062	0.962605	0.943804	0.93035	0.938841	0.952847	0.942546	0.946055	0.000122924	0.0110871
9.93005	228.924	287.174	230.394	244.892	260.162	169.26	234.231	242.983	292.409	183.782	269.389	255.702	238.53	212.995		9.93005	216.924	275.174	218.394	232.892	248.162	157.26	222.231	230.983	280.409	171.782	257.389	243.702	226.53	200.995		9.93005	0.94153	0.952134	0.963559	0.954502	0.949544	0.913437	0.940835	0.942343	0.953074	0.918633	0.953861	0.948926	0.971656	0.965941	0.947855	0.000263713	0.0162392
9.96846	227.165	279.474	232.637	244.547	259.31	174.823	235.959	242.571	293.02	188.359	270.251	259.691	230.554	213.88		9.96846	215.165	267.474	220.637	232.547	247.31	162.823	223.959	230.571	281.02	176.359	258.251	247.691	218.554	201.88		9.96846	0.933895	0.925491	0.973456	0.953089	0.946284	0.945749	0.948151	0.940662	0.955151	0.943109	0.957055	0.964458	0.937445	0.970194	0.949585	0.000187546	0.0136947
9.99611	226.845	284.384	230.577	242.824	261.721	172.508	229.002	241.311	297.925	191.115	267.273	260.301	234.953	207.417		9.99611	214.845	272.384	218.577	230.824	249.721	160.508	217.002	229.311	285.925	179.115	255.273	248.301	222.953	195.417		9.99611	0.932506	0.942481	0.964367	0.946027	0.955509	0.932302	0.918698	0.935522	0.971822	0.957847	0.946019	0.966833	0.956313	0.939134	0.947527	0.000232855	0.0152596
10.0345	224.668	283.356	229.943	243.968	257.023	175.622	239.295	238.346	303.553	191.721	275.759	258.218	232.032	213.239		10.0345	212.668	271.356	217.943	231.968	245.023	163.622	227.295	226.346	291.553	179.721	263.759	246.218	220.032	201.239		10.0345	0.923057	0.938924	0.96157	0.950715	0.937533	0.95039	0.962274	0.923425	0.990951	0.961088	0.977467	0.958723	0.943784	0.967113	0.953358	0.000369194	0.0192144
10.0566	227.409	287.455	230.787	242.288	257.132	173.551	233.255	241.413	295.871	183.736	273.483	256.723	234.736	215.3		10.0566	215.409	275.455	218.787	230.288	245.132	161.551	221.255	229.413	283.871	171.736	261.483	244.723	222.736	203.3		10.0566	0.934954	0.953107	0.965293	0.94383	0.937951	0.938361	0.936703	0.935938	0.964841	0.918387	0.969033	0.952901	0.955382	0.977018	0.948836	0.00026873	0.016393
10.095	230.078	287.483	229.386	239.372	263.366	173.9	233.526	245.263	293.893	190.31	269.899	250.125	232.768	208.52		10.095	218.078	275.483	217.386	227.372	251.366	161.9	221.526	233.263	281.893	178.31	257.899	238.125	220.768	196.52		10.095	0.946538	0.953204	0.959112	0.931879	0.961804	0.940388	0.937851	0.951645	0.958118	0.953542	0.955751	0.92721	0.946941	0.944435	0.947744	0.000108898	0.0104354
10.1209	229.373	284.825	226.718	248.003	258.373	173.456	230.847	246.285	294.777	188.711	267.008	256.081	235.152	212.596		10.1209	217.373	272.825	214.718	236.003	246.373	161.456	218.847	234.285	282.777	176.711	255.008	244.081	223.152	200.596		10.1209	0.943478	0.944007	0.947341	0.967253	0.942699	0.937809	0.926509	0.955814	0.961123	0.944991	0.945037	0.950402	0.957167	0.964023	0.949118	0.000121652	0.0110296
10.1593	226.213	283.247	230.999	243.42	255.964	170.823	239.51	241.255	294.027	188.862	263.09	258.914	236.204	212.784		10.1593	214.213	271.247	218.999	231.42	243.964	158.823	227.51	229.255	282.027	176.862	251.09	246.914	224.204	200.784		10.1593	0.929763	0.938547	0.966229	0.94847	0.933481	0.922515	0.963184	0.935293	0.958574	0.945799	0.930517	0.961433	0.961679	0.964927	0.947172	0.000236426	0.0153761
10.1814	233.412	281.618	225.055	244.747	255.1	176.448	232.695	237.982	295.399	184.639	265.508	258.199	236.741	207.903		10.1814	221.412	269.618	213.055	232.747	243.1	164.448	220.695	225.982	283.399	172.639	253.508	246.199	224.741	195.903		10.1814	0.961009	0.93291	0.940004	0.953908	0.930176	0.955188	0.934333	0.92194	0.963237	0.923216	0.939478	0.958649	0.963982	0.94147	0.94425	0.000220362	0.0148446
10.2198	222.937	283.645	226.155	241.765	256.316	171.829	238.324	246.723	297.085	180.675	266.176	257.2	233.638	207.887		10.2198	210.937	271.645	214.155	229.765	244.316	159.829	226.324	234.723	285.085	168.675	254.176	245.2	221.638	195.887		10.2198	0.915544	0.939924	0.944857	0.941687	0.934828	0.928358	0.958163	0.957601	0.968967	0.902018	0.941954	0.954759	0.950673	0.941393	0.94148	0.000308854	0.0175742
10.2456	233.873	286.623	231.14	244.377	259.312	172.223	229.542	237.98	295.426	188.471	266.841	254.05	230.217	206.437		10.2456	221.873	274.623	219.14	232.377	247.312	160.223	217.542	225.98	283.426	176.471	254.841	242.05	218.217	194.437		10.2456	0.96301	0.950228	0.966851	0.952392	0.946292	0.930647	0.920984	0.921932	0.963329	0.943708	0.944418	0.942493	0.935999	0.934424	0.944051	0.000209602	0.0144776
10.284	231.284	286.383	227.787	240.822	258.336	172.465	232.532	241.144	300.785	185.731	266.914	254.983	236.697	211.124		10.284	219.284	274.383	215.787	228.822	246.336	160.465	220.532	229.144	288.785	173.731	254.914	242.983	224.697	199.124		10.284	0.951773	0.949397	0.952057	0.937822	0.942557	0.932053	0.933642	0.93484	0.981543	0.929055	0.944689	0.946126	0.963794	0.956949	0.946878	0.000200765	0.0141692
10.3061	225.871	285.693	231.911	244.478	258.203	174.484	237.582	244.228	297.887	188.381	266.879	256.775	237.941	206.596		10.3061	213.871	273.693	219.911	232.478	246.203	162.484	225.582	232.228	285.887	176.381	254.879	244.775	225.941	194.596		10.3061	0.928278	0.94701	0.970253	0.952806	0.942049	0.94378	0.955022	0.947422	0.971693	0.943227	0.944559	0.953104	0.96913	0.935189	0.950251	0.000167134	0.012928
10.3445	227.176	284.037	231.13	246.641	261.212	171.925	234.351	240.84	295.652	185.245	262.597	247.964	233.292	210.079		10.3445	215.176	272.037	219.13	234.641	249.212	159.925	222.351	228.84	283.652	173.245	250.597	235.964	221.292	198.079		10.3445	0.933943	0.94128	0.966807	0.961671	0.953562	0.928916	0.941343	0.9336	0.964097	0.926456	0.92869	0.918796	0.949189	0.951927	0.942877	0.000232964	0.0152632
10.3703	230.645	285.205	230.963	243.455	256.496	175.119	231.305	247.589	299.47	189.09	264.207	256.662	236.892	211.3		10.3703	218.645	273.205	218.963	231.455	244.496	163.119	219.305	235.589	287.47	177.09	252.207	244.662	224.892	199.3		10.3703	0.948999	0.945321	0.96607	0.948613	0.935517	0.947468	0.928448	0.961134	0.977074	0.947018	0.934657	0.952664	0.96463	0.957795	0.951101	0.000179225	0.0133875
10.4087	228.536	279.719	231.529	244.628	258.678	173.949	233.211	242.365	297.099	188.826	267.908	257.641	237.496	210.856		10.4087	216.536	267.719	219.529	232.628	246.678	161.949	221.211	230.365	285.099	176.826	255.908	245.641	225.496	198.856		10.4087	0.939845	0.926339	0.968567	0.95342	0.943866	0.940672	0.936517	0.939822	0.969015	0.945606	0.948372	0.956476	0.967221	0.955661	0.949386	0.000167553	0.0129442
10.4309	227.971	283.676	225.137	240.932	254.73	171.28	233.184	243.742	295.533	183.822	267.728	256.09	235.044	208.54		10.4309	215.971	271.676	213.137	228.932	242.73	159.28	221.184	231.742	283.533	171.822	255.728	244.09	223.044	196.54		10.4309	0.937393	0.940031	0.940365	0.938273	0.92876	0.92517	0.936403	0.94544	0.963692	0.918847	0.947705	0.950437	0.956704	0.944531	0.940982	0.000143219	0.0119674
10.4693	228.007	284.553	229.492	240.504	256.799	173.552	234.022	241.866	296.577	190.265	267.587	259.042	237.133	211.961		10.4693	216.007	272.553	217.492	228.504	244.799	161.552	222.022	229.866	284.577	178.265	255.587	247.042	225.133	199.961		10.4693	0.937549	0.943065	0.95958	0.936518	0.936676	0.938366	0.93995	0.937786	0.967241	0.953302	0.947183	0.961931	0.965664	0.960972	0.948985	0.000142262	0.0119273
10.4951	225.281	285.365	230.374	245.279	260.096	177.502	231.878	241.334	292.417	186.559	265.643	256.261	236.676	208.782		10.4951	213.281	273.365	218.374	233.279	248.096	165.502	219.878	229.334	280.417	174.559	253.643	244.261	224.676	196.782		10.4951	0.925718	0.945875	0.963471	0.956089	0.949292	0.96131	0.930874	0.935616	0.953101	0.933483	0.939978	0.951102	0.963704	0.945694	0.946808	0.000151851	0.0123228
10.5335	232.981	280.328	233.419	241.562	266.262	171.086	238.305	241.35	292.105	180.62	265.534	252.666	234.407	213.673		10.5335	220.981	268.328	221.419	229.562	254.262	159.086	226.305	229.35	280.105	168.62	253.534	240.666	222.407	201.673		10.5335	0.959138	0.928446	0.976906	0.940855	0.972885	0.924043	0.958083	0.935681	0.952041	0.901724	0.939574	0.937104	0.953971	0.969199	0.946404	0.000433582	0.0208226
10.5556	225.767	284.256	234.407	243.412	258.952	176.419	234.504	249.917	294.247	184.209	265.04	250.685	234.678	211.994		10.5556	213.767	272.256	222.407	231.412	246.952	164.419	222.504	237.917	282.247	172.209	253.04	238.685	222.678	199.994		10.5556	0.927827	0.942038	0.981265	0.948437	0.944914	0.955019	0.941991	0.970632	0.959321	0.920916	0.937744	0.929391	0.955134	0.96113	0.948268	0.000283986	0.0168519
10.594	223.728	287.031	235.38	244.299	260.332	171.847	232.827	234.565	292.57	181.672	269.375	253.818	232.117	211.976		10.594	211.728	275.031	223.38	232.299	248.332	159.847	220.827	222.565	280.57	169.672	257.375	241.818	220.117	199.976		10.594	0.918977	0.95164	0.985558	0.952072	0.950195	0.928463	0.934891	0.908	0.953622	0.907349	0.953809	0.94159	0.944149	0.961044	0.94224	0.000455421	0.0213406
10.6198	226.3	286.097	227.715	236.667	255.348	178.221	235.028	243.159	297.254	184.862	273.063	247.278	235.078	212.202		10.6198	214.3	274.097	215.715	224.667	243.348	166.221	223.028	231.159	285.254	172.862	261.063	235.278	223.078	200.202		10.6198	0.93014	0.948408	0.95174	0.920793	0.931124	0.965486	0.944209	0.943061	0.969542	0.924408	0.967476	0.916124	0.956849	0.96213	0.945107	0.000329186	0.0181435
10.6582	226.986	281.819	227.492	240.753	258.436	177.875	230.88	239.973	295.665	190.705	267.646	251.187	240.997	211.587		10.6582	214.986	269.819	215.492	228.753	246.436	165.875	218.88	227.973	283.665	178.705	255.646	239.187	228.997	199.587		10.6582	0.933118	0.933605	0.950756	0.937539	0.94294	0.963476	0.926649	0.930063	0.964141	0.955655	0.947401	0.931345	0.982238	0.959174	0.947007	0.000266815	0.0163345
10.6803	225.987	279.688	223.355	237.864	256.832	175.761	234.227	244.927	291.115	185.29	265.591	252.805	233.82	215.044		10.6803	213.987	267.688	211.355	225.864	244.832	163.761	222.227	232.927	279.115	173.29	253.591	240.805	221.82	203.044		10.6803	0.928782	0.926232	0.932503	0.925698	0.936803	0.951197	0.940818	0.950274	0.948676	0.926697	0.939786	0.937645	0.951453	0.975788	0.940882	0.000190527	0.0138032
10.7188	218.588	283.096	231.242	239.695	252.332	168.117	237.902	243.998	294.492	182.839	267.493	249.691	228.532	212.972		10.7188	206.588	271.096	219.242	227.695	240.332	156.117	225.902	231.998	282.492	170.839	255.493	237.691	216.532	200.972		10.7188	0.896667	0.938024	0.967301	0.933203	0.919584	0.906797	0.956377	0.946484	0.960154	0.91359	0.946834	0.92552	0.928772	0.96583	0.936081	0.000495458	0.0222589
10.7446	225.373	285.846	226.739	240.678	260.499	170.43	233.428	243.178	293.675	188.738	267.229	260.897	234.651	209.38		10.7446	213.373	273.846	214.739	228.678	248.499	158.43	221.428	231.178	281.675	176.738	255.229	248.897	222.651	197.38		10.7446	0.926117	0.947539	0.947434	0.937231	0.950834	0.920232	0.937436	0.943139	0.957377	0.945136	0.945856	0.969154	0.955018	0.948568	0.945076	0.000152909	0.0123656
10.783	223.025	284.869	227.034	236.627	263.192	169.734	231.616	242.434	294.611	190.794	263.733	251.261	237.561	216.589		10.783	211.025	272.869	215.034	224.627	251.192	157.734	219.616	230.434	282.611	178.794	251.733	239.261	225.561	204.589		10.783	0.915926	0.944159	0.948735	0.920629	0.961138	0.91619	0.929764	0.940103	0.960559	0.956131	0.9329	0.931633	0.9675	0.983213	0.94347	0.000417325	0.0204285
10.8051	230.915	286.984	228.671	243.295	260.423	175.552	230.412	244.07	287.93	193.267	270.154	256.161	233.077	208.69		10.8051	218.915	274.984	216.671	231.295	248.423	163.552	218.412	232.07	275.93	181.267	258.154	244.161	221.077	196.69		10.8051	0.950171	0.951477	0.955958	0.947957	0.950543	0.949983	0.924667	0.946778	0.937851	0.969355	0.956696	0.950713	0.948266	0.945252	0.948976	9.79047e-05	0.00989468
10.8435	233.588	287.77	226.955	246.163	261.2	177.264	232.807	245.237	292.672	188.696	270.269	263.64	234.491	214.66		10.8435	221.588	275.77	214.955	234.163	249.2	165.264	220.807	233.237	280.672	176.696	258.269	251.64	222.491	202.66		10.8435	0.961773	0.954197	0.948387	0.959712	0.953516	0.959927	0.934807	0.951539	0.953968	0.944911	0.957122	0.979835	0.954332	0.973942	0.956283	0.000124539	0.0111597
10.8711	229.701	282.961	223.516	240.373	260.602	176.484	231.399	240.445	291.457	189.152	272.202	260.371	237.227	211.03		10.8711	217.701	270.961	211.516	228.373	248.602	164.484	219.399	228.445	279.457	177.152	260.202	248.371	225.227	199.03		10.8711	0.944902	0.937557	0.933214	0.935981	0.951228	0.955397	0.928846	0.931989	0.949839	0.94735	0.964286	0.967106	0.966067	0.956497	0.947876	0.000169429	0.0130165
10.9096	227.033	287.495	230.2	247.854	258.528	173.346	236.228	240.918	296.918	186.839	269.698	262.729	232.154	207.592		10.9096	215.033	275.495	218.2	235.854	246.528	161.346	224.228	228.918	284.918	174.839	257.698	250.729	220.154	195.592		10.9096	0.933322	0.953245	0.962704	0.966642	0.943292	0.93717	0.94929	0.933918	0.9684	0.934981	0.955006	0.976287	0.944307	0.939975	0.949896	0.000200672	0.0141659
10.9317	232.349	285.382	225.357	241.034	252.845	171.509	236.232	238.492	291.961	190.194	263.742	260.618	231.099	213.397		10.9317	220.349	273.382	213.357	229.034	240.845	159.509	224.232	226.492	279.961	178.194	251.742	248.618	219.099	201.397		10.9317	0.956395	0.945934	0.941336	0.938691	0.921547	0.9265	0.949307	0.924021	0.951552	0.952922	0.932933	0.968068	0.939782	0.967873	0.944061	0.000219721	0.014823
10.9701	229.963	284.486	229.992	242.55	266.408	172.665	233.705	242.134	293.847	190.273	266.775	258.891	234.355	209.118		10.9701	217.963	272.486	217.992	230.55	254.408	160.665	221.705	230.134	281.847	178.273	254.775	246.891	222.355	197.118		10.9701	0.946039	0.942834	0.961786	0.944904	0.973443	0.933214	0.938608	0.938879	0.957962	0.953345	0.944174	0.961343	0.953748	0.947309	0.949828	0.000121137	0.0110062
10.9959	237.078	289.654	230.041	240.623	263.343	171.005	232.108	237.685	298.016	186.283	267.443	253.321	236.932	212.52		10.9959	225.078	277.654	218.041	228.623	251.343	159.005	220.108	225.685	286.016	174.283	255.443	241.321	224.932	200.52		10.9959	0.976921	0.960715	0.962002	0.937006	0.961716	0.923572	0.931847	0.920729	0.972132	0.932007	0.946649	0.939655	0.964802	0.963658	0.949529	0.00034683	0.0186234
11.0343	232.188	289.45	234.182	240.145	255.951	177.622	234.708	241.167	294.458	186.267	266.504	256.664	233.213	217.809		11.0343	220.188	277.45	222.182	228.145	243.951	165.622	222.708	229.167	282.458	174.267	254.504	244.664	221.213	205.809		11.0343	0.955696	0.96001	0.980272	0.935047	0.933432	0.962007	0.942855	0.934934	0.960039	0.931922	0.943169	0.952672	0.94885	0.989076	0.952141	0.000301138	0.0173533
11.0564	225.328	281.728	228.439	246.597	261.951	171.548	235.461	237.217	301.782	182.336	269.225	256.622	234.479	210.219		11.0564	213.328	269.728	216.439	234.597	249.951	159.548	223.461	225.217	289.782	170.336	257.225	244.622	222.479	198.219		11.0564	0.925922	0.933291	0.954934	0.96149	0.95639	0.926726	0.946043	0.918819	0.984932	0.9109	0.953253	0.952508	0.95428	0.9526	0.945149	0.000388253	0.0197041
11.0948	229.307	286.064	229.15	244.953	258.904	174.461	232.154	243.246	299.548	190.26	268.684	255.536	237.104	213.794		11.0948	217.307	274.064	217.15	232.953	246.904	162.461	220.154	231.246	287.548	178.26	256.684	243.536	225.104	201.794		11.0948	0.943192	0.948294	0.958071	0.954752	0.944731	0.943646	0.932042	0.943416	0.977339	0.953275	0.951248	0.948279	0.965539	0.969781	0.9524	0.000145054	0.0120438
11.1206	223.764	285.06	222.947	245.868	258.245	176.442	234.336	238.977	296.015	193.482	268.333	252.297	235.629	212.177		11.1206	211.764	273.06	210.947	233.868	246.245	164.442	222.336	226.977	284.015	181.482	256.333	240.297	223.629	200.177		11.1206	0.919133	0.94482	0.930703	0.958503	0.942209	0.955153	0.94128	0.926	0.965331	0.970505	0.949947	0.935667	0.959213	0.96201	0.947177	0.000241691	0.0155464
11.159	226.854	291.231	232.121	242.529	254.721	171.124	231.811	240.054	293.395	188.234	272.724	254.003	239.482	210.982		11.159	214.854	279.231	220.121	230.529	242.721	159.124	219.811	228.054	281.395	176.234	260.724	242.003	227.482	198.982		11.159	0.932545	0.966172	0.971179	0.944818	0.928725	0.924263	0.93059	0.930394	0.956426	0.942441	0.96622	0.94231	0.975739	0.956267	0.947721	0.00030519	0.0174697
11.1812	229.278	288.668	234.621	241.617	256.542	175.368	233.856	245.431	290.566	188.682	263.518	252.078	236.779	211.225		11.1812	217.278	276.668	222.621	229.617	244.542	163.368	221.856	233.431	278.566	176.682	251.518	240.078	224.779	199.225		11.1812	0.943066	0.957304	0.982209	0.94108	0.935693	0.948915	0.939248	0.95233	0.94681	0.944836	0.932103	0.934815	0.964145	0.957435	0.948571	0.000181524	0.0134731
11.2196	226.253	282.742	228.822	239.926	259.184	175.703	236.526	241.753	296.017	188.616	269.918	260.793	232.447	206.105		11.2196	214.253	270.742	216.822	227.926	247.184	163.703	224.526	229.753	284.017	176.616	257.918	248.793	220.447	194.105		11.2196	0.929936	0.936799	0.956624	0.934149	0.945802	0.95086	0.950551	0.937325	0.965337	0.944483	0.955821	0.968749	0.945564	0.932829	0.946774	0.000143933	0.0119972
11.2454	228.845	281.123	231.836	241.546	261.42	176.298	229.382	239.444	294.247	184.175	276.453	261.499	236.846	215.859		11.2454	216.845	269.123	219.836	229.546	249.42	164.298	217.382	227.444	282.247	172.175	264.453	249.499	224.846	203.859		11.2454	0.941187	0.931197	0.969922	0.940789	0.954358	0.954316	0.920307	0.927905	0.959321	0.920734	0.980039	0.971498	0.964433	0.979705	0.951122	0.000438567	0.020942
11.2838	230.86	288.54	237.167	238.465	255.154	174.221	235.458	242.176	293.73	186.917	273.16	255.207	233.254	210.686		11.2838	218.86	276.54	225.167	226.465	243.154	162.221	223.458	230.176	281.73	174.917	261.16	243.207	221.254	198.686		11.2838	0.949932	0.956861	0.993442	0.928162	0.930382	0.942252	0.94603	0.939051	0.957564	0.935398	0.967836	0.946998	0.949026	0.954844	0.949841	0.000277952	0.0166719
11.3059	224.978	282.446	229.951	238.902	256.415	173.995	234.986	244.783	296.535	184.925	268.76	255.752	226.088	212.467		11.3059	212.978	270.446	217.951	226.902	244.415	161.995	222.986	232.783	284.535	172.925	256.76	243.752	214.088	200.467		11.3059	0.924402	0.935775	0.961605	0.929953	0.935207	0.94094	0.944032	0.949687	0.967098	0.924745	0.95153	0.94912	0.918289	0.963403	0.942556	0.000236428	0.0153762
11.3443	225.683	289.634	228.756	244.948	259.582	174.181	237.983	236.653	294.553	185.568	265.181	246.969	233.418	216.302		11.3443	213.683	277.634	216.756	232.948	247.582	162.181	225.983	224.653	282.553	173.568	253.181	234.969	221.418	204.302		11.3443	0.927462	0.960646	0.956333	0.954732	0.947325	0.94202	0.95672	0.916518	0.960361	0.928184	0.938266	0.914921	0.949729	0.981834	0.945361	0.000352649	0.018779
11.3701	224.942	280.568	228.898	238.178	253.933	174.896	238.683	244.606	300.773	188.426	264.459	252.425	232.338	209.668		11.3701	212.942	268.568	216.898	226.178	241.933	162.896	226.683	232.606	288.773	176.426	252.459	240.425	220.338	197.668		11.3701	0.924246	0.929277	0.956959	0.926985	0.92571	0.946173	0.959683	0.948964	0.981502	0.943467	0.935591	0.936166	0.945097	0.949952	0.943555	0.000249765	0.0158039
11.4085	228.341	285.29	234.688	236.215	260.824	174.42	232.083	234.003	297.128	187.436	271.74	253.991	237.087	219.072		11.4085	216.341	273.29	222.688	224.215	248.824	162.42	220.083	222.003	285.128	175.436	259.74	241.991	225.087	207.072		11.4085	0.938999	0.945616	0.982505	0.91894	0.952077	0.943408	0.931742	0.905707	0.969114	0.938173	0.962573	0.942263	0.965467	0.995146	0.949409	0.000576932	0.0240194
11.4306	223.328	281.022	236.567	241.678	263.427	178.028	235.426	244.173	290.148	187.316	264.082	257.512	234.65	213.278		11.4306	211.328	269.022	224.567	229.678	251.427	166.028	223.426	232.173	278.148	175.316	252.082	245.512	222.65	201.278		11.4306	0.917241	0.930848	0.990795	0.94133	0.962037	0.964365	0.945894	0.947198	0.945389	0.937532	0.934194	0.955974	0.955014	0.967301	0.949651	0.000333871	0.0182721
11.4691	224.2	282.83	231.661	239.544	254.808	178.931	233.557	240.003	293.914	185.266	268.294	257.656	235.64	212.31		11.4691	212.2	270.83	219.661	227.544	242.808	166.931	221.557	228.003	281.914	173.266	256.294	245.656	223.64	200.31		11.4691	0.921026	0.937104	0.969149	0.932584	0.929058	0.96961	0.937982	0.930186	0.95819	0.926569	0.949803	0.956534	0.95926	0.962649	0.945693	0.000283145	0.0168269
11.4949	220.176	282.128	228.54	240.155	255.144	172.716	232.776	238.362	298.372	182.379	264.966	250.651	233.934	212.495		11.4949	208.176	270.128	216.54	228.155	243.144	160.716	220.776	226.362	286.372	170.379	252.966	238.651	221.934	200.495		11.4949	0.90356	0.934675	0.95538	0.935088	0.930344	0.933511	0.934675	0.923491	0.973342	0.91113	0.93747	0.929258	0.951942	0.963538	0.936957	0.000360549	0.0189881
11.5333	223.55	279.11	228.627	245.349	258.935	173.676	236.139	236.504	294.526	190.347	266.091	251.253	235.704	216.605		11.5333	211.55	267.11	216.627	233.349	246.935	161.676	224.139	224.504	282.526	178.347	254.091	239.253	223.704	204.605		11.5333	0.918204	0.924232	0.955763	0.956375	0.944849	0.939087	0.948913	0.915911	0.96027	0.95374	0.941639	0.931602	0.959534	0.98329	0.945244	0.000343688	0.0185388
11.5554	224.927	287.121	231.084	242.605	250.203	173.332	231.854	239.049	295.767	187.191	264.222	255.006	229.441	210.982		11.5554	212.927	275.121	219.084	230.605	238.203	161.332	219.854	227.049	283.767	175.191	252.222	243.006	217.441	198.982		11.5554	0.924181	0.951951	0.966604	0.945129	0.911438	0.937089	0.930772	0.926293	0.964488	0.936863	0.934712	0.946216	0.932671	0.956267	0.940334	0.000247482	0.0157316
11.5938	226.279	288.071	231.129	243.355	261.653	174.726	240.118	237.244	291.981	189.846	266.521	253.408	237.66	215.986		11.5938	214.279	276.071	219.129	231.355	249.653	162.726	228.118	225.244	279.981	177.846	254.521	241.408	225.66	203.986		11.5938	0.930049	0.955238	0.966802	0.948203	0.955249	0.945186	0.965758	0.91893	0.95162	0.951061	0.943232	0.939993	0.967924	0.980315	0.951397	0.000256776	0.0160242
11.6196	222.785	278.96	226.072	238.098	260.527	176.962	235.064	242.861	290.015	190.584	264.759	256.219	239.54	212.306		11.6196	210.785	266.96	214.072	226.098	248.527	164.962	223.064	230.861	278.015	178.584	252.759	244.219	227.54	200.306		11.6196	0.914884	0.923713	0.944491	0.926657	0.950941	0.958173	0.944362	0.941845	0.944937	0.955008	0.936702	0.950939	0.975988	0.96263	0.945091	0.000260865	0.0161513
11.658	231.124	282.914	229.823	241.969	259.525	174.907	231.614	239.542	287.475	183.469	269.053	248.72	237.88	216.272		11.658	219.124	270.914	217.823	229.969	247.525	162.907	219.614	227.542	275.475	171.469	257.053	236.72	225.88	204.272		11.658	0.951078	0.937394	0.96104	0.942523	0.947107	0.946237	0.929756	0.928305	0.936304	0.916959	0.952616	0.921739	0.968868	0.981689	0.944401	0.000326695	0.0180747
11.6801	226.113	279.166	226.906	242.177	259.248	173.999	237.205	241.029	294.858	190.304	268.996	254.117	239.814	206.672		11.6801	214.113	267.166	214.906	230.177	247.248	161.999	225.205	229.029	282.858	178.304	256.996	242.117	227.814	194.672		11.6801	0.929329	0.924426	0.94817	0.943375	0.946047	0.940963	0.953426	0.934371	0.961398	0.95351	0.952404	0.942754	0.977163	0.935554	0.945921	0.000184306	0.013576
11.7185	225.815	287.094	230.999	239.429	263.613	176.097	233.83	235.053	294.48	184.187	262.506	251.519	232.425	207.215		11.7185	213.815	275.094	218.999	227.429	251.613	164.097	221.83	223.053	282.48	172.187	250.506	239.519	220.425	195.215		11.7185	0.928035	0.951858	0.966229	0.932113	0.962749	0.953149	0.939138	0.909991	0.960113	0.920799	0.928353	0.932638	0.94547	0.938163	0.940628	0.000278189	0.016679
11.7462	226.385	285.007	233.496	244.828	253.621	170.538	235.111	234.208	291.681	185.082	262.031	258.154	236.085	214.308		11.7462	214.385	273.007	221.496	232.828	241.621	158.538	223.111	222.208	279.681	173.082	250.031	246.154	224.085	202.308		11.7462	0.930509	0.944636	0.977246	0.95424	0.924516	0.92086	0.944561	0.906544	0.9506	0.925585	0.926593	0.958473	0.961169	0.972251	0.942699	0.000436558	0.020894
11.7846	228.64	284.884	230.015	243.549	259.049	172.99	239.633	238.291	294.464	181.32	273.057	260.851	240.896	214.95		11.7846	216.64	272.884	218.015	231.549	247.049	160.99	227.633	226.291	282.464	169.32	261.057	248.851	228.896	202.95		11.7846	0.940297	0.944211	0.961887	0.948998	0.945286	0.935102	0.963705	0.923201	0.960059	0.905467	0.967454	0.968975	0.981805	0.975336	0.951556	0.000445292	0.0211019
11.8067	225.447	285.559	232.427	242.429	258.413	169.522	231.586	240.252	292.74	185.009	267.904	258.568	239.895	215.591		11.8067	213.447	273.559	220.427	230.429	246.413	157.522	219.586	228.252	280.74	173.009	255.904	246.568	227.895	203.591		11.8067	0.926438	0.946546	0.972529	0.944408	0.942852	0.914958	0.929637	0.931201	0.954199	0.925194	0.948357	0.960085	0.977511	0.978417	0.946595	0.000407108	0.0201769
11.8451	228.252	286.852	231.888	237.563	256.599	172.433	232.448	243.66	291.801	191.953	266.303	254.17	238.471	211.684		11.8451	216.252	274.852	219.888	225.563	244.599	160.433	220.448	231.66	279.801	179.953	254.303	242.17	226.471	199.684		11.8451	0.938613	0.95102	0.970151	0.924465	0.935911	0.931867	0.933287	0.945105	0.951008	0.962329	0.942424	0.94296	0.971403	0.95964	0.947156	0.000209013	0.0144573
11.8709	223.756	284.033	230.088	240.722	254.397	171.515	233.597	238.812	294.164	183.737	271.982	253.523	231.007	208.055		11.8709	211.756	272.033	218.088	228.722	242.397	159.515	221.597	226.812	282.164	171.737	259.982	241.523	219.007	196.055		11.8709	0.919098	0.941266	0.962209	0.937412	0.927486	0.926535	0.938151	0.925327	0.959039	0.918392	0.96347	0.940441	0.939388	0.9422	0.938601	0.000219488	0.0148151
11.9093	225.373	283.804	232.033	242.904	256.779	174.554	230.844	235.599	299.799	187.166	269.84	259.455	233.379	211.27		11.9093	213.373	271.804	220.033	230.904	244.779	162.554	218.844	223.599	287.799	175.166	257.84	247.455	221.379	199.27		11.9093	0.926117	0.940474	0.970791	0.946355	0.9366	0.944186	0.926496	0.912218	0.978192	0.936729	0.955532	0.963539	0.949562	0.957651	0.946032	0.000332538	0.0182356
11.9314	226.876	280.214	225.336	241.972	251.137	175.442	231.385	238.279	294.096	188.938	267.726	254.922	237.07	211.607		11.9314	214.876	268.214	213.336	229.972	239.137	163.442	219.385	226.279	282.096	176.938	255.726	242.922	225.07	199.607		11.9314	0.93264	0.928052	0.941243	0.942535	0.915012	0.949344	0.928787	0.923152	0.958808	0.946205	0.947698	0.945889	0.965394	0.95927	0.941716	0.000214411	0.0146428
11.9699	221.873	291.998	232.176	246.189	256.579	171.645	235.233	242.696	298.788	183.44	271.019	245.93	232.238	215.636		11.9699	209.873	279.998	220.176	234.189	244.579	159.645	223.233	230.696	286.788	171.44	259.019	233.93	220.238	203.636		11.9699	0.910926	0.968826	0.971422	0.959818	0.935835	0.92729	0.945077	0.941172	0.974756	0.916804	0.959901	0.910876	0.944668	0.978633	0.946143	0.000556822	0.0235971
11.9957	220.414	281.553	231.951	246.301	258.08	174.25	231.088	240.748	294.157	188.057	266.706	253.124	238.764	210.574		11.9957	208.414	269.553	219.951	234.301	246.08	162.25	219.088	228.748	282.157	176.057	254.706	241.124	226.764	198.574		11.9957	0.904593	0.932685	0.970429	0.960277	0.941578	0.942421	0.927529	0.933225	0.959016	0.941494	0.943918	0.938888	0.97266	0.954306	0.944501	0.000324777	0.0180216
12.0341	234.11	280.863	226.652	248.36	262.973	172.355	241.558	230.302	293.532	185.951	261.21	259.887	231.988	210.58		12.0341	222.11	268.863	214.652	236.36	250.973	160.355	229.558	218.302	281.532	173.951	249.21	247.887	219.988	198.58		12.0341	0.964039	0.930298	0.94705	0.968716	0.9603	0.931414	0.971855	0.890608	0.956891	0.930232	0.92355	0.965221	0.943595	0.954335	0.945579	0.000504348	0.0224577
12.0562	222.294	286.255	232.06	242.402	254.711	170.669	230.391	240.572	293.429	182.525	265.58	259.247	240.372	211.115		12.0562	210.294	274.255	220.06	230.402	242.711	158.669	218.391	228.572	281.429	170.525	253.58	247.247	228.372	199.115		12.0562	0.912753	0.948955	0.97091	0.944297	0.928687	0.921621	0.924578	0.932507	0.956541	0.911911	0.939745	0.962729	0.979557	0.956906	0.942264	0.000454949	0.0213295
12.0946	224.374	284.152	232.278	243.938	258.449	175.353	235.271	232.072	289.867	190.873	267.45	250.726	238.133	211.217		12.0946	212.374	272.152	220.278	231.938	246.449	163.353	223.271	220.072	277.867	178.873	255.45	238.726	226.133	199.217		12.0946	0.921781	0.941678	0.971872	0.950593	0.94299	0.948827	0.945238	0.897829	0.944434	0.956553	0.946675	0.92955	0.969953	0.957396	0.944669	0.000361341	0.019009
12.1204	226.189	287.762	229.13	239.534	252.131	175.99	234.34	239.903	299.753	187.88	267.499	252.407	237.75	208.216		12.1204	214.189	275.762	217.13	227.534	240.131	163.99	222.34	227.903	287.753	175.88	255.499	240.407	225.75	196.216		12.1204	0.929659	0.954169	0.957983	0.932543	0.918815	0.952527	0.941297	0.929778	0.978036	0.940548	0.946857	0.936096	0.96831	0.942974	0.944971	0.000259406	0.0161061
12.1588	224.355	284.571	233.276	242.107	257.501	174.309	239.103	240.499	292.004	192.632	265.202	254.265	239.5	209.3		12.1588	212.355	272.571	221.276	230.107	245.501	162.309	227.103	228.499	280.004	180.632	253.202	242.265	227.5	197.3		12.1588	0.921698	0.943128	0.976275	0.943088	0.939362	0.942763	0.961461	0.932209	0.951698	0.96596	0.938344	0.94333	0.975817	0.948183	0.948808	0.000252894	0.0159026
12.1809	225.748	290.937	228.855	245.129	254.772	179.042	237.458	243.47	291.38	185.763	264.654	251.402	235.186	214.199		12.1809	213.748	278.937	216.855	233.129	242.772	167.042	225.458	231.47	279.38	173.763	252.654	239.402	223.186	202.199		12.1809	0.927744	0.965155	0.956769	0.955474	0.92892	0.970255	0.954497	0.94433	0.949577	0.929227	0.936313	0.932182	0.957313	0.971727	0.948535	0.000241517	0.0155408
12.2193	223.8	281.538	227.026	245.762	260.369	179.731	234.278	244.432	299.398	184.954	274.071	253.113	233.378	214.44		12.2193	211.8	269.538	215.026	233.762	248.369	167.731	222.278	232.432	287.398	172.954	262.071	241.113	221.378	202.44		12.2193	0.919289	0.932633	0.9487	0.958068	0.950336	0.974257	0.941034	0.948255	0.976829	0.9249	0.971212	0.938845	0.949558	0.972885	0.950486	0.000340636	0.0184563
12.2451	226.786	277.92	231.318	247.194	260.589	170.888	237.659	241.872	298.697	188.864	279.815	261.137	234.503	211.745		12.2451	214.786	265.92	219.318	235.194	248.589	158.888	225.659	229.872	286.697	176.864	267.815	249.137	222.503	199.745		12.2451	0.93225	0.920114	0.967636	0.963937	0.951178	0.922893	0.955348	0.93781	0.974446	0.94581	0.992499	0.970089	0.954383	0.959934	0.953452	0.000415601	0.0203863
12.2836	224.697	277.81	227.039	238.66	261.115	171.132	234.851	237.174	301.211	189.525	267.877	251.715	229.883	215.104		12.2836	212.697	265.81	215.039	226.66	249.115	159.132	222.851	225.174	289.211	177.525	255.877	239.715	217.883	203.104		12.2836	0.923183	0.919734	0.948757	0.928961	0.953191	0.92431	0.94346	0.918644	0.982991	0.949344	0.948257	0.933401	0.934566	0.976076	0.941777	0.000393417	0.0198347
12.3057	225.727	285.595	230.887	245.497	259.478	173.747	233.769	238.778	286.198	185.083	268.369	261.777	236.671	219.398		12.3057	213.727	273.595	218.887	233.497	247.478	161.747	221.769	226.778	274.198	173.083	256.369	249.777	224.671	207.398		12.3057	0.927653	0.946671	0.965735	0.956982	0.946927	0.939499	0.938879	0.925188	0.931964	0.92559	0.950081	0.972581	0.963682	0.996712	0.949153	0.000419696	0.0204865
12.3441	224.736	287.275	226.255	241.558	260.331	174.637	237.857	244.559	295.76	188.697	269.529	262.149	236.679	215.841		12.3441	212.736	275.275	214.255	229.558	248.331	162.637	225.857	232.559	283.76	176.697	257.529	250.149	224.679	203.841		12.3441	0.923352	0.952484	0.945298	0.940838	0.950191	0.944669	0.956186	0.948773	0.964464	0.944917	0.95438	0.974029	0.963717	0.979618	0.953065	0.000204309	0.0142937
12.3699	227.683	284.999	224.495	237.676	260.364	175.084	231.527	239.378	289.948	189.943	271.677	257.854	234.553	213.199		12.3699	215.683	272.999	212.495	225.676	248.364	163.084	219.527	227.378	277.948	177.943	259.677	245.854	222.553	201.199		12.3699	0.936143	0.944609	0.937533	0.924928	0.950317	0.947265	0.929388	0.927636	0.94471	0.95158	0.96234	0.957305	0.954597	0.966921	0.945377	0.00016785	0.0129557
12.4083	224.232	281.517	229.622	244.571	256.309	170.727	234.53	240.005	290.061	191.681	266.473	256.994	241.115	211.661		12.4083	212.232	269.517	217.622	232.571	244.309	158.727	222.53	228.005	278.061	179.681	254.473	244.994	229.115	199.661		12.4083	0.921165	0.932561	0.960153	0.953187	0.934802	0.921958	0.942101	0.930194	0.945094	0.960874	0.943054	0.953957	0.982744	0.95953	0.945812	0.000295738	0.017197
12.4304	222.91	279.708	229.505	243.127	256.432	173.792	231.925	245.073	287.29	191.582	261.854	254.665	231.125	215.667		12.4304	210.91	267.708	217.505	231.127	244.432	161.792	219.925	233.073	275.29	179.582	249.854	242.665	219.125	203.667		12.4304	0.915427	0.926301	0.959637	0.947269	0.935272	0.93976	0.931073	0.95087	0.935675	0.960345	0.925937	0.944888	0.939894	0.978782	0.942223	0.000272256	0.0165002
12.4688	232.081	286.34	231.902	244.747	257.5	167.689	234.429	241.259	297.512	183.366	273.004	264.392	234.519	209.227		12.4688	220.081	274.34	219.902	232.747	245.5	155.689	222.429	229.259	285.512	171.366	261.004	252.392	222.519	197.227		12.4688	0.955232	0.949249	0.970213	0.953908	0.939359	0.904311	0.941674	0.93531	0.970419	0.916408	0.967258	0.982763	0.954452	0.947833	0.94917	0.000451464	0.0212477
12.4946	224.871	276.72	228.27	241.168	262.322	175.593	229.585	240.327	296.675	189.551	265.661	255.242	239.712	208.841		12.4946	212.871	264.72	216.27	229.168	250.322	163.593	217.585	228.327	284.675	177.551	253.661	243.242	227.712	196.841		12.4946	0.923938	0.915962	0.954188	0.93924	0.957809	0.950221	0.921166	0.931507	0.967574	0.949484	0.940045	0.947135	0.976726	0.945978	0.944355	0.000300485	0.0173345
12.533	225.291	279.792	229.235	244.618	258.382	171.404	231.656	242.906	289.547	183.606	271.945	255.804	236.284	216.304		12.533	213.291	267.792	217.235	232.618	246.382	159.404	219.656	230.906	277.547	171.606	259.945	243.804	224.284	204.304		12.533	0.925761	0.926592	0.958446	0.953379	0.942733	0.92589	0.929934	0.942029	0.943347	0.917692	0.963333	0.949323	0.962022	0.981843	0.944452	0.000331723	0.0182133
12.5552	224.712	282.607	224.84	244.944	263.593	173.161	235.077	241.312	290.422	186.564	268.471	258.012	234.846	209.087		12.5552	212.712	270.607	212.84	232.944	251.593	161.161	223.077	229.312	278.422	174.564	256.471	246.012	222.846	197.087		12.5552	0.923248	0.936332	0.939055	0.954716	0.962672	0.936095	0.944417	0.935526	0.946321	0.93351	0.950459	0.95792	0.955854	0.94716	0.94452	0.000123807	0.0111268
12.5936	228.08	281.608	224.807	237.356	256.582	164.615	233.254	243.574	288.95	191.032	271.513	263.145	235.615	216.432		12.5936	216.08	269.608	212.807	225.356	244.582	152.615	221.254	231.574	276.95	179.032	259.513	251.145	223.615	204.432		12.5936	0.937866	0.932875	0.938909	0.923616	0.935846	0.886456	0.936699	0.944754	0.941318	0.957403	0.961732	0.977907	0.959153	0.982458	0.944071	0.000568768	0.0238489
12.6212	223.05	273.935	234.394	246.68	258.145	174.191	231.602	244.305	288.988	190.535	271.615	256.512	235.383	217.826		12.6212	211.05	261.935	222.394	234.68	246.145	162.191	219.602	232.305	276.988	178.535	259.615	244.512	223.383	205.826		12.6212	0.916034	0.906326	0.981208	0.961831	0.941827	0.942078	0.929705	0.947736	0.941447	0.954746	0.96211	0.95208	0.958158	0.989158	0.948889	0.000503906	0.0224479
12.6596	230.28	277.281	236.24	248.525	259.629	177.347	238.268	241.215	288.288	190.397	269.003	245.076	238.421	215.999		12.6596	218.28	265.281	224.24	236.525	247.629	165.347	226.268	229.215	276.288	178.397	257.003	233.076	226.421	203.999		12.6596	0.947415	0.917903	0.989352	0.969392	0.947505	0.960409	0.957926	0.93513	0.939068	0.954008	0.95243	0.90755	0.971188	0.980377	0.952118	0.000508649	0.0225532
12.6817	225.511	287.408	230.023	237.001	260.919	177.481	233.134	243.48	290.119	191.907	272.129	251.953	232.252	211.109		12.6817	213.511	275.408	218.023	225.001	248.919	165.481	221.134	231.48	278.119	179.907	260.129	239.953	220.252	199.109		12.6817	0.926716	0.952944	0.961923	0.922161	0.952441	0.961188	0.936191	0.944371	0.945291	0.962083	0.964015	0.934328	0.944728	0.956877	0.947518	0.000186194	0.0136453
12.7202	232.41	283.83	225.759	246.954	258.002	168.368	235.976	242.676	295.572	192.79	266.851	259.631	232.254	214.946		12.7202	220.41	271.83	213.759	234.954	246.002	156.368	223.976	230.676	283.572	180.79	254.851	247.631	220.254	202.946		12.7202	0.95666	0.940564	0.94311	0.962954	0.941279	0.908255	0.948223	0.941091	0.963825	0.966805	0.944455	0.964225	0.944736	0.975317	0.950107	0.000278843	0.0166986
12.746	227.889	281.591	229.185	240.612	260.086	173.63	236.061	239.601	297.138	188.776	272.477	258.363	233.173	215.617		12.746	215.889	269.591	217.185	228.612	248.086	161.63	224.061	227.601	285.138	176.776	260.477	246.363	221.173	203.617		12.746	0.937037	0.932817	0.958225	0.936961	0.949253	0.938819	0.948583	0.928545	0.969148	0.945339	0.965305	0.959287	0.948678	0.978542	0.949753	0.0002164	0.0147105
12.7844	227.185	275.264	231.743	244.914	254.386	173.569	237.784	241.47	295.992	188.641	271.003	254.606	235.683	211.335		12.7844	215.185	263.264	219.743	232.914	242.386	161.569	225.784	229.47	283.992	176.641	259.003	242.606	223.683	199.335		12.7844	0.933982	0.910924	0.969511	0.954593	0.927444	0.938465	0.955877	0.93617	0.965252	0.944617	0.959842	0.944658	0.959444	0.957963	0.947053	0.000266998	0.0163401
12.8065	229.902	278.53	225.587	241.606	256.559	168.931	229.762	242.342	300.633	184.661	274.804	255.31	239.228	213.553		12.8065	217.902	266.53	213.587	229.606	244.559	156.931	217.762	230.342	288.633	172.661	262.804	243.31	227.228	201.553		12.8065	0.945774	0.922225	0.942351	0.941035	0.935758	0.911526	0.921915	0.939728	0.981027	0.923333	0.973928	0.947399	0.97465	0.968622	0.944948	0.000488903	0.0221112
12.8449	223.629	279.961	229.871	242.773	254.286	173.405	236.858	240.343	298.302	184.976	272.087	252.118	237.02	216.978		12.8449	211.629	267.961	217.871	230.773	242.286	161.405	224.858	228.343	286.302	172.976	260.087	240.118	225.02	204.978		12.8449	0.918547	0.927177	0.961252	0.945818	0.927061	0.937513	0.951957	0.931573	0.973104	0.925018	0.963859	0.93497	0.965179	0.985082	0.946294	0.000424964	0.0206146
12.8707	224.768	284.159	227.719	245.524	256.258	170.109	233.326	238.621	294.653	186.362	268.168	255.417	237.036	215.088		12.8707	212.768	272.159	215.719	233.524	244.258	158.109	221.326	226.621	282.653	174.362	256.168	243.417	225.036	203.088		12.8707	0.923491	0.941702	0.951757	0.957093	0.934606	0.918368	0.937004	0.924547	0.960701	0.93243	0.949336	0.947816	0.965248	0.975999	0.944293	0.000289243	0.0170071
12.9091	227.613	286.415	228.58	243.519	254.328	173.449	237.039	239.917	298.664	185.145	271.473	254.068	233.382	211.587		12.9091	215.613	274.415	216.58	231.519	242.328	161.449	225.039	227.917	286.664	173.145	259.473	242.068	221.382	199.587		12.9091	0.935839	0.949508	0.955556	0.948875	0.927222	0.937768	0.952723	0.929835	0.974334	0.925922	0.961584	0.942563	0.949575	0.959174	0.946463	0.000198925	0.0141041
12.9312	230.43	284.766	238.464	241.546	254.193	169.988	234.079	239.227	297.152	186.508	273.748	258.081	238.273	213.441		12.9312	218.43	272.766	226.464	229.546	242.193	157.988	222.079	227.227	285.152	174.508	261.748	246.081	226.273	201.441		12.9312	0.948066	0.943802	0.999164	0.940789	0.926705	0.917665	0.940192	0.92702	0.969195	0.933211	0.970015	0.958189	0.970554	0.968084	0.950904	0.000508669	0.0225537
12.9696	229.746	285.005	234.578	247.541	259.687	178.191	230.162	237.345	292.149	190.041	270.953	260.296	228.923	209.472		12.9696	217.746	273.005	222.578	235.541	247.687	166.191	218.162	225.345	280.149	178.041	258.953	248.296	216.923	197.472		12.9696	0.945097	0.944629	0.982019	0.965359	0.947727	0.965312	0.923609	0.919342	0.952191	0.952104	0.959657	0.966814	0.930449	0.94901	0.950237	0.000304439	0.0174482
12.9954	228.231	287.827	231.844	247.613	263.951	171.274	233.027	238.633	287.453	191.381	261.135	260.072	232.27	218.749		12.9954	216.231	275.827	219.844	235.613	251.951	159.274	221.027	226.633	275.453	179.381	249.135	248.072	220.27	206.749		12.9954	0.938522	0.954394	0.969957	0.965654	0.964042	0.925135	0.935738	0.924596	0.936229	0.95927	0.923272	0.965942	0.944805	0.993593	0.950082	0.000433074	0.0208104
13.0339	225.639	285.824	237.86	245.587	256.408	173.614	234.348	238.112	289.224	188.074	265.29	261.442	234.048	212.047		13.0339	213.639	273.824	225.86	233.587	244.408	161.614	222.348	226.112	277.224	176.074	253.29	249.442	222.048	200.047		13.0339	0.927271	0.947463	0.9965	0.957351	0.93518	0.938727	0.941331	0.922471	0.942249	0.941585	0.93867	0.971276	0.952431	0.961385	0.948135	0.000362905	0.0190501
13.056	228.054	281.98	230.195	241.848	261.31	174.747	229.756	243.342	290.996	192.084	267.142	256.055	228.333	218.463		13.056	216.054	269.98	218.195	229.848	249.31	162.747	217.756	231.342	278.996	180.084	255.142	244.055	216.333	206.463		13.056	0.937753	0.934163	0.962681	0.942027	0.953937	0.945307	0.92189	0.943808	0.948272	0.963029	0.945534	0.9503	0.927918	0.992219	0.947774	0.000298824	0.0172865
13.0944	225.476	275.689	235.932	244.137	258.443	168.507	234.003	237.126	289.958	191.226	267.202	256.391	240.58	216.084		13.0944	213.476	263.689	223.932	232.137	246.443	156.507	222.003	225.126	277.958	179.226	255.202	244.391	228.58	204.084		13.0944	0.926564	0.912395	0.987993	0.951408	0.942967	0.909063	0.93987	0.918448	0.944744	0.958441	0.945756	0.951609	0.980449	0.980786	0.946464	0.000619357	0.0248869
13.1202	226.414	279.512	228.709	240.272	254.91	174.292	237.082	242.398	289.652	187.073	266.741	257.111	232.814	206.199		13.1202	214.414	267.512	216.709	228.272	242.91	162.292	225.082	230.398	277.652	175.073	254.741	245.111	220.814	194.199		13.1202	0.930635	0.925623	0.956125	0.935568	0.929449	0.942665	0.952905	0.939956	0.943704	0.936232	0.944048	0.954412	0.947138	0.933281	0.940839	9.21014e-05	0.00959695
13.1586	227.112	278.322	233.905	244.975	256.47	175.46	231.819	242.926	291.353	185.665	274.835	251.766	232.037	214.195		13.1586	215.112	266.322	221.905	232.975	244.47	163.46	219.819	230.926	279.353	173.665	262.835	239.766	220.037	202.195		13.1586	0.933665	0.921505	0.97905	0.954843	0.935418	0.949449	0.930624	0.942111	0.949485	0.928703	0.974043	0.9336	0.943806	0.971708	0.946286	0.000324167	0.0180046
13.1807	228.455	275.742	227.695	241.762	256.727	180.725	227.942	239.268	294.906	190.801	276.035	252.438	236.467	215.295		13.1807	216.455	263.742	215.695	229.762	244.727	168.725	215.942	227.268	282.906	178.801	264.035	240.438	224.467	203.295		13.1807	0.939494	0.912578	0.951651	0.941674	0.936401	0.98003	0.91421	0.927187	0.961561	0.956168	0.97849	0.936216	0.962807	0.976994	0.948247	0.000499539	0.0223504
13.2191	228.164	280.786	230.667	244.622	261.711	177.709	236.814	244.791	296.135	183.911	265.769	259.819	235.875	208.739		13.2191	216.164	268.786	218.667	232.622	249.711	165.709	224.814	232.791	284.135	171.911	253.769	247.819	223.875	196.739		13.2191	0.938231	0.930031	0.964764	0.953396	0.955471	0.962512	0.951771	0.949719	0.965738	0.919323	0.940445	0.964957	0.960268	0.945487	0.950151	0.000198903	0.0141033
13.2449	228.754	280.53	228.508	246.301	258.036	169.505	232.649	238.907	293.142	185.048	268.004	259.622	238.053	216.02		13.2449	216.754	268.53	216.508	234.301	246.036	157.505	220.649	226.907	281.142	173.048	256.004	247.622	226.053	204.02		13.2449	0.940792	0.929145	0.955238	0.960277	0.94141	0.91486	0.934138	0.925714	0.955566	0.925403	0.948728	0.964189	0.96961	0.980478	0.946111	0.000364883	0.0191019
13.2833	230.612	283.588	231.225	240.316	258.496	176.337	234.406	246.34	291.059	182.879	271.31	251.582	240.078	212.392		13.2833	218.612	271.588	219.225	228.316	246.496	164.337	222.406	234.34	279.059	170.879	259.31	239.582	228.078	200.392		13.2833	0.948856	0.939726	0.967226	0.935748	0.94317	0.954543	0.941576	0.956039	0.948486	0.913804	0.96098	0.932883	0.978296	0.963043	0.948884	0.000266212	0.016316
13.3055	231.373	278.378	231.944	237.975	256.089	172.462	234.371	244.856	288.833	189.075	264.223	251.353	235.568	214.895		13.3055	219.373	266.378	219.944	225.975	244.089	160.462	222.371	232.856	276.833	177.075	252.223	239.353	223.568	202.895		13.3055	0.952159	0.921699	0.970398	0.926153	0.93396	0.932035	0.941428	0.949984	0.94092	0.946938	0.934716	0.931992	0.958951	0.975072	0.944029	0.000254088	0.0159401
13.3439	225.249	277.678	228.197	239.579	256.631	173.429	237.196	239.283	292.747	187.111	271.562	256.134	231.366	212.032		13.3439	213.249	265.678	216.197	227.579	244.631	161.429	225.196	227.283	280.747	175.111	259.562	244.134	219.366	200.032		13.3439	0.925579	0.919277	0.953866	0.932727	0.936034	0.937652	0.953388	0.927248	0.954223	0.936435	0.961914	0.950608	0.940927	0.961313	0.942228	0.000187617	0.0136973
13.3697	230.849	278.383	235.895	243.575	256.58	175.474	236.178	244.89	296.014	187.809	262.034	252.682	238.593	211.033		13.3697	218.849	266.383	223.895	231.575	244.58	163.474	224.178	232.89	284.014	175.809	250.034	240.682	226.593	199.033		13.3697	0.949885	0.921717	0.98783	0.949105	0.935838	0.94953	0.949078	0.950123	0.965327	0.940168	0.926604	0.937167	0.971926	0.956512	0.949344	0.000307256	0.0175287
13.4081	222.37	284.696	227.552	240.884	262.416	172.015	230.417	242.558	296.669	187.161	274.607	259.64	238.645	209.947		13.4081	210.37	272.696	215.552	228.884	250.416	160.015	218.417	230.558	284.669	175.161	262.607	247.64	226.645	197.947		13.4081	0.913083	0.94356	0.95102	0.938076	0.958169	0.929439	0.924688	0.940609	0.967553	0.936703	0.973198	0.96426	0.972149	0.951293	0.947414	0.000337772	0.0183786
13.4302	227.859	284.194	229.231	244.697	263.148	167.337	234.09	241.832	290.879	193.045	263.439	261.169	235.287	213.84		13.4302	215.859	272.194	217.231	232.697	251.148	155.337	222.09	229.832	278.879	181.045	251.439	249.169	223.287	201.84		13.4302	0.936907	0.941823	0.958428	0.953703	0.96097	0.902267	0.940238	0.937647	0.947874	0.968168	0.931811	0.970213	0.957746	0.970002	0.948414	0.000343737	0.0185402
13.4686	228.338	282.046	230.969	243.422	254.658	168.552	235.503	243.819	295.055	190.202	268.311	256.549	230.869	210.048		13.4686	216.338	270.046	218.969	231.422	242.658	156.552	223.503	231.819	283.055	178.202	256.311	244.549	218.869	198.048		13.4686	0.938986	0.934391	0.966096	0.948478	0.928484	0.909324	0.94622	0.945754	0.962068	0.952965	0.949866	0.952224	0.938796	0.951778	0.944674	0.000205155	0.0143232
13.4962	227.179	281.332	225.172	241.572	254.412	167.253	231.906	247.967	292.938	180.033	266.39	257.634	238.473	208.493		13.4962	215.179	269.332	213.172	229.572	242.412	155.253	219.906	235.967	280.938	168.033	254.39	245.634	226.473	196.493		13.4962	0.933956	0.93192	0.94052	0.940896	0.927543	0.901779	0.930992	0.962676	0.954872	0.898584	0.942747	0.956449	0.971412	0.944305	0.938475	0.000423189	0.0205716
13.5347	230.972	273.867	234.09	243.679	260.731	174.07	235.826	243.87	294.36	189.639	274.403	254.273	233.89	210.296		13.5347	218.972	261.867	222.09	231.679	248.731	162.07	223.826	231.87	282.36	177.639	262.403	242.273	221.89	198.296		13.5347	0.950419	0.906091	0.979866	0.949531	0.951721	0.941375	0.947588	0.945962	0.959705	0.949954	0.972442	0.943362	0.951754	0.95297	0.950196	0.00027486	0.0165789
13.5568	228.921	285.856	226.591	242.521	258.948	170.69	234.041	244.741	288.931	191.234	269.248	253.513	236.166	211.772		13.5568	216.921	273.856	214.591	230.521	246.948	158.69	222.041	232.741	276.931	179.234	257.248	241.513	224.166	199.772		13.5568	0.941516	0.947574	0.946781	0.944785	0.944899	0.921743	0.940031	0.949515	0.941253	0.958484	0.953338	0.940402	0.961516	0.960063	0.946564	0.000104609	0.0102278
13.5952	234.606	281.373	226.37	241.15	259.788	171.518	237.325	247.146	287.377	188.85	270.898	258.944	236.888	211.793		13.5952	222.606	269.373	214.37	229.15	247.788	159.518	225.325	235.146	275.377	176.85	258.898	246.944	224.888	199.793		13.5952	0.966191	0.932062	0.945805	0.939166	0.948113	0.926552	0.953934	0.959327	0.935971	0.945735	0.959453	0.961549	0.964613	0.960164	0.949903	0.000163785	0.0127978
13.621	229.152	280.783	220.403	250.888	258.202	167.822	237.148	238.889	295.075	186.052	269.309	258.261	234.28	214.154		13.621	217.152	268.783	208.403	238.888	246.202	155.822	225.148	226.889	283.075	174.052	257.309	246.261	222.28	202.154		13.621	0.942519	0.930021	0.919479	0.979077	0.942045	0.905084	0.953185	0.925641	0.962136	0.930772	0.953564	0.95889	0.953426	0.971511	0.944811	0.000432504	0.0207967
13.6594	236.326	283.317	232.724	245.901	259.014	170.389	230.877	238.47	287.82	183.169	268.809	252.441	238.781	210.223		13.6594	224.326	271.317	220.724	233.901	247.014	158.389	218.877	226.47	275.82	171.169	256.809	240.441	226.781	198.223		13.6594	0.973657	0.938789	0.973839	0.958638	0.945152	0.919994	0.926636	0.923931	0.937477	0.915355	0.951711	0.936228	0.972733	0.952619	0.944768	0.000397521	0.0199379
13.6815	237.188	279.054	222.239	244.515	258.956	172.593	234.416	236.41	291.801	190.197	266.105	257.285	236.027	210.026		13.6815	225.188	267.054	210.239	232.515	246.956	160.593	222.416	224.41	279.801	178.197	254.105	245.285	224.027	198.026		13.6815	0.977398	0.924038	0.927579	0.952957	0.94493	0.932796	0.941619	0.915527	0.951008	0.952938	0.941691	0.95509	0.96092	0.951672	0.945012	0.00026113	0.0161595
13.7199	231.038	287.155	228.228	246.85	263.119	167.701	234.356	233.653	286.803	189.343	270.079	259.669	237.672	212.563		13.7199	219.038	275.155	216.228	234.85	251.119	155.701	222.356	221.653	274.803	177.343	258.079	247.669	225.672	200.563		13.7199	0.950705	0.952069	0.954003	0.962527	0.960859	0.904381	0.941365	0.904279	0.93402	0.948371	0.956418	0.964372	0.967976	0.963865	0.947515	0.000421257	0.0205245
13.7457	232.777	285.4	236.501	240.974	261.201	172.003	232.012	243.5	283.374	188.253	273.153	256.77	237.33	212.985		13.7457	220.777	273.4	224.501	228.974	249.201	160.003	220.012	231.5	271.374	176.253	261.153	244.77	225.33	200.985		13.7457	0.958253	0.945996	0.990504	0.938445	0.95352	0.929369	0.931441	0.944452	0.922365	0.942542	0.96781	0.953084	0.966509	0.965893	0.950727	0.000333474	0.0182613
13.7841	229.512	290.044	223.495	240.032	258.848	171.335	235.905	237.129	288.608	186.122	270.839	265.788	230.685	213.242		13.7841	217.512	278.044	211.495	228.032	246.848	159.335	223.905	225.129	276.608	174.122	258.839	253.788	218.685	201.242		13.7841	0.944082	0.962065	0.933121	0.934584	0.944517	0.925489	0.947922	0.91846	0.940155	0.931146	0.959234	0.988199	0.938006	0.967128	0.945293	0.000342842	0.018516
13.8063	229.708	281.355	229.042	241.058	260.333	168.571	231.431	243.366	295.948	182.224	265.69	254.166	237.045	210.834		13.8063	217.708	269.355	217.042	229.058	248.333	156.571	219.431	231.366	283.948	170.224	253.69	242.166	225.045	198.834		13.8063	0.944932	0.932	0.957594	0.938789	0.950199	0.909435	0.928981	0.943906	0.965103	0.910301	0.940153	0.942945	0.965286	0.955556	0.941799	0.000302404	0.0173898
13.8447	231.685	276.751	223.778	249.309	253.568	173.721	228.433	241.655	290.071	187.766	261.387	252.451	235.099	212.894		13.8447	219.685	264.751	211.778	237.309	241.568	161.721	216.433	229.655	278.071	175.766	249.387	240.451	223.099	200.894		13.8447	0.953513	0.91607	0.93437	0.972605	0.924314	0.939348	0.916289	0.936925	0.945128	0.939938	0.924206	0.936267	0.956939	0.965455	0.940098	0.00029944	0.0173043
13.8705	227.852	281.722	227.072	242.753	260.417	172.486	238.099	240.341	290.648	184.846	264.63	256.502	234.046	208.671		13.8705	215.852	269.722	215.072	230.753	248.417	160.486	226.099	228.341	278.648	172.846	252.63	244.502	222.046	196.671		13.8705	0.936877	0.93327	0.948903	0.945736	0.95052	0.932175	0.957211	0.931564	0.947089	0.924323	0.936224	0.952041	0.952423	0.945161	0.942394	9.71136e-05	0.00985462
13.9089	232.315	276.3	230.704	243.871	253.759	166.789	233.319	245.055	290.988	188.449	257.56	255.734	234.59	211.317		13.9089	220.315	264.3	218.704	231.871	241.759	154.789	221.319	233.055	278.988	176.449	245.56	243.734	222.59	199.317		13.9089	0.956248	0.914509	0.964927	0.950318	0.925044	0.899084	0.936974	0.950796	0.948244	0.94359	0.910024	0.94905	0.954756	0.957877	0.940103	0.000404896	0.020122
13.931	228.594	285.185	228.894	240.297	262.864	172.943	233.019	237.66	291.512	188.356	268.377	257.425	233.315	209.623		13.931	216.594	273.185	216.894	228.297	250.864	160.943	221.019	225.66	279.512	176.356	256.377	245.425	221.315	197.623		13.931	0.940097	0.945252	0.956941	0.93567	0.959883	0.934829	0.935704	0.920627	0.950026	0.943093	0.95011	0.955635	0.949287	0.949736	0.944778	0.000112876	0.0106243
13.9694	231.423	278.281	229.431	244.126	262.335	176.736	233.165	239.165	287.101	191.184	266.77	253.647	235.335	217.531		13.9694	219.423	266.281	217.431	232.126	250.335	164.736	221.165	227.165	275.101	179.184	254.77	241.647	223.335	205.531		13.9694	0.952376	0.921364	0.959311	0.951363	0.957859	0.95686	0.936322	0.926767	0.935033	0.958216	0.944155	0.940924	0.957952	0.98774	0.949017	0.000279384	0.0167148
13.9952	229.524	283.223	234.268	243.785	259.603	173.032	233.586	242.315	285.979	187.774	262.313	254.984	234.032	215.916		13.9952	217.524	271.223	222.268	231.785	247.603	161.032	221.586	230.315	273.979	175.774	250.313	242.984	222.032	203.916		13.9952	0.944134	0.938463	0.980652	0.949965	0.947405	0.935346	0.938105	0.939618	0.93122	0.939981	0.927638	0.94613	0.952363	0.979979	0.9465	0.000252208	0.0158811
14.0336	231.715	286.697	229.683	247.865	262.593	173.68	234.054	245.403	291.87	185.786	263.567	250.942	238.986	212.942		14.0336	219.715	274.697	217.683	235.865	250.593	161.68	222.054	233.403	279.87	173.786	251.567	238.942	226.986	200.942		14.0336	0.953643	0.950484	0.960423	0.966687	0.958846	0.93911	0.940086	0.952216	0.951242	0.92935	0.932285	0.930391	0.973612	0.965686	0.95029	0.000202258	0.0142217
14.0557	231.527	281.523	232.227	244.176	256.992	168.541	230.019	244.559	284.775	184.861	263.599	259.308	233.418	213.709		14.0557	219.527	269.523	220.227	232.176	244.992	156.541	218.019	232.559	272.775	172.861	251.599	247.308	221.418	201.709		14.0557	0.952827	0.932581	0.971647	0.951568	0.937415	0.90926	0.923003	0.948773	0.927127	0.924403	0.932404	0.962967	0.949729	0.969372	0.942363	0.000349674	0.0186996
14.0942	229.378	284.465	226.462	242.81	258.967	172.801	229.558	239.669	290.036	188.695	267.34	256.791	236.038	210.896		14.0942	217.378	272.465	214.462	230.81	246.967	160.801	217.558	227.669	278.036	176.695	255.34	244.791	224.038	198.896		14.0942	0.9435	0.942761	0.946211	0.945969	0.944972	0.934004	0.921052	0.928823	0.945009	0.944906	0.946267	0.953166	0.960967	0.955853	0.943819	0.000106716	0.0103303
14.12	231.492	284.803	231.438	240.054	261.968	167.896	233.269	240.198	287.53	186.555	266.532	256.524	234.972	209.346		14.12	219.492	272.803	219.438	228.054	249.968	155.896	221.269	228.198	275.53	174.555	254.532	244.524	222.972	197.346		14.12	0.952676	0.94393	0.968166	0.934674	0.956455	0.905514	0.936763	0.930981	0.936491	0.933462	0.943273	0.952126	0.956395	0.948404	0.942808	0.000230118	0.0151696
14.1584	232.529	283.764	226.977	243.712	253.764	172.15	230.647	244.12	292.418	187.674	265.309	255.681	231.557	212.055		14.1584	220.529	271.764	214.977	231.712	241.764	160.15	218.647	232.12	280.418	175.674	253.309	243.681	219.557	200.055		14.1584	0.957177	0.940335	0.948484	0.949666	0.925064	0.930223	0.925662	0.946982	0.953105	0.939446	0.938741	0.948844	0.941747	0.961423	0.94335	0.000122332	0.0110604
14.1805	228.216	283.19	228.18	242.414	254.549	170.393	228.553	243.494	292.126	187.511	269.12	254.691	231.542	214.623		14.1805	216.216	271.19	216.18	230.414	242.549	158.393	216.553	231.494	280.126	175.511	257.12	242.691	219.542	202.623		14.1805	0.938457	0.938349	0.953791	0.944346	0.928067	0.920017	0.916797	0.944428	0.952112	0.938574	0.952864	0.944989	0.941682	0.973765	0.942017	0.000210685	0.014515
14.2189	229.421	282.875	229.439	239.584	256.724	174.449	230.86	241.75	290.204	184.702	266.129	256.147	236.592	215.637		14.2189	217.421	270.875	217.439	227.584	244.724	162.449	218.86	229.75	278.204	172.702	254.129	244.147	224.592	203.637		14.2189	0.943687	0.937259	0.959346	0.932748	0.936389	0.943577	0.926564	0.937313	0.94558	0.923553	0.94178	0.950659	0.963343	0.978638	0.944317	0.00021976	0.0148243
14.2447	232.725	281.848	232.342	245.484	258.846	175.176	229.396	238.915	290.156	191.264	270.754	255.387	237.835	214.3		14.2447	220.725	269.848	220.342	233.484	246.846	163.176	217.396	226.915	278.156	179.264	258.754	243.387	225.835	202.3		14.2447	0.958027	0.933706	0.972154	0.956929	0.944509	0.947799	0.920366	0.925747	0.945417	0.958644	0.958919	0.947699	0.968675	0.972212	0.950772	0.000260348	0.0161353
14.2831	226.267	275.854	227.389	240.411	255.171	178.647	231.18	240.729	290.474	182.561	265.436	251.527	232.837	214.278		14.2831	214.267	263.854	215.389	228.411	243.171	166.647	219.18	228.729	278.474	170.561	253.436	239.527	220.837	202.278		14.2831	0.929997	0.912966	0.950301	0.936137	0.930447	0.96796	0.927919	0.933147	0.946497	0.912103	0.939211	0.932669	0.947237	0.972107	0.938479	0.000303347	0.0174169
14.3052	223.107	283.132	233.072	242.624	260.025	173.43	233.613	236.599	293.496	183.397	269.175	250.995	231.228	207.988		14.3052	211.107	271.132	221.072	230.624	248.025	161.43	221.613	224.599	281.496	171.397	257.175	238.995	219.228	195.988		14.3052	0.916282	0.938149	0.975375	0.945207	0.94902	0.937658	0.938219	0.916298	0.956769	0.916574	0.953068	0.930598	0.940336	0.941878	0.939674	0.000275967	0.0166123
14.3436	227.697	286.609	226.372	248.027	254.834	170.117	232.842	247.338	294.542	179.876	264.406	251.873	234.81	213.645		14.3436	215.697	274.609	214.372	236.027	242.834	158.117	220.842	235.338	282.542	167.876	252.406	239.873	222.81	201.645		14.3436	0.936204	0.950179	0.945814	0.967351	0.929158	0.918414	0.934955	0.96011	0.960324	0.897745	0.935394	0.934016	0.9557	0.969065	0.942459	0.000398111	0.0199527
14.3694	228.028	280.225	223.682	245.427	259.725	175.759	233.142	239.928	284.33	184.406	260.342	258.682	233.239	214.596		14.3694	216.028	268.225	211.682	233.427	247.725	163.759	221.142	227.928	272.33	172.406	248.342	246.682	221.239	202.596		14.3694	0.937641	0.92809	0.933946	0.956695	0.947872	0.951186	0.936225	0.92988	0.925615	0.92197	0.920333	0.960529	0.948961	0.973635	0.940898	0.000254394	0.0159497
14.4079	231.169	282.028	229.784	239.378	253.382	179.721	234.947	243.765	284.574	188.201	261.871	255.683	235.275	216.309		14.4079	219.169	270.028	217.784	227.378	241.382	167.721	222.947	231.765	272.574	176.201	249.871	243.683	223.275	204.309		14.4079	0.951274	0.934329	0.960868	0.931903	0.923602	0.974199	0.943867	0.945533	0.926444	0.942264	0.926	0.948852	0.957694	0.981867	0.946335	0.000316276	0.0177842
14.43	226.156	290.479	231.535	244.565	261.007	177.353	234.519	245.194	289.571	189.788	264.39	257.923	242.177	212.854		14.43	214.156	278.479	219.535	232.565	249.007	165.353	222.519	233.194	277.571	177.788	252.39	245.923	230.177	200.854		14.43	0.929515	0.96357	0.968594	0.953162	0.952778	0.960444	0.942055	0.951363	0.943428	0.950751	0.935335	0.957574	0.987299	0.965263	0.954367	0.000216516	0.0147145
14.4684	227.763	282.347	231.189	241.877	258.792	172.361	234.105	240.78	293.286	188.787	266.539	258.725	239.171	219.423		14.4684	215.763	270.347	219.189	229.877	246.792	160.361	222.105	228.78	281.286	176.787	254.539	246.725	227.171	207.423		14.4684	0.93649	0.935432	0.967067	0.942146	0.944302	0.931449	0.940302	0.933355	0.956055	0.945398	0.943299	0.960697	0.974405	0.996833	0.950516	0.000345982	0.0186006
14.496	225.102	288.538	225.579	241.464	252.083	180.226	233.526	240.268	287.677	186.294	263.879	258.652	235.271	219.5		14.496	213.102	276.538	213.579	229.464	240.083	168.226	221.526	228.268	275.677	174.294	251.879	246.652	223.271	207.5		14.496	0.924941	0.956854	0.942316	0.940453	0.918632	0.977132	0.937851	0.931267	0.936991	0.932066	0.933441	0.960412	0.957677	0.997203	0.946231	0.000461957	0.0214932
14.5344	230.143	282.033	225.628	242.815	259.729	171.216	234.095	243.43	290.681	186.489	270.891	254.284	236.682	211.781		14.5344	218.143	270.033	213.628	230.815	247.729	159.216	222.095	231.43	278.681	174.489	258.891	242.284	224.682	199.781		14.5344	0.94682	0.934346	0.942532	0.94599	0.947887	0.924798	0.94026	0.944167	0.947201	0.933109	0.959427	0.943404	0.963729	0.960107	0.94527	0.000115264	0.0107361
14.5566	227.419	280.556	223.492	243.482	257.281	169.435	234.909	240.568	284.148	189.333	266.733	251.214	235.777	214.566		14.5566	215.419	268.556	211.492	231.482	245.281	157.435	222.909	228.568	272.148	177.333	254.733	239.214	223.777	202.566		14.5566	0.934997	0.929235	0.933108	0.948724	0.938521	0.914453	0.943706	0.932491	0.924996	0.948318	0.944018	0.93145	0.959848	0.973491	0.939811	0.000222159	0.014905
14.595	228.845	283.919	228.043	247.501	256.957	176.391	234.545	239.717	292.087	194.234	262.3	259.41	237.24	213.009		14.595	216.845	271.919	216.043	235.501	244.957	164.391	222.545	227.717	280.087	182.234	250.3	247.41	225.24	201.009		14.595	0.941187	0.940872	0.953187	0.965195	0.937281	0.954857	0.942165	0.929019	0.95198	0.974527	0.92759	0.963364	0.966123	0.966008	0.950954	0.000221446	0.0148811
14.6208	227.412	284.042	232.116	243.958	257.474	174.266	232.149	244.807	290.853	192.093	268.275	255.134	236.912	216.225		14.6208	215.412	272.042	220.116	231.958	245.474	162.266	220.149	232.807	278.853	180.093	256.275	243.134	224.912	204.225		14.6208	0.934967	0.941297	0.971157	0.950675	0.939259	0.942514	0.932021	0.949784	0.947786	0.963077	0.949732	0.946714	0.964716	0.981464	0.951083	0.000201645	0.0142002
14.6592	230.771	280.248	237.462	242.869	258.708	174.593	231.923	242.707	298.486	184.984	267.984	261.853	234.959	213.795		14.6592	218.771	268.248	225.462	230.869	246.708	162.593	219.923	230.707	286.486	172.984	255.984	249.853	222.959	201.795		14.6592	0.949546	0.92817	0.994744	0.946211	0.943981	0.944413	0.931064	0.941217	0.973729	0.925061	0.948654	0.972877	0.956339	0.969785	0.951842	0.000391584	0.0197885
14.6813	227.705	281.365	229.289	242.099	257.273	173.345	230.772	246.066	288.675	192.65	266.663	262.52	236.482	214.749		14.6813	215.705	269.365	217.289	230.099	245.273	161.345	218.772	234.066	276.675	180.65	254.663	250.52	224.482	202.749		14.6813	0.936239	0.932035	0.958684	0.943055	0.93849	0.937164	0.926191	0.954921	0.940383	0.966056	0.943758	0.975474	0.962872	0.97437	0.949264	0.00025494	0.0159669
14.7197	222.964	279.651	225.038	242.038	258.069	177.912	235.32	235.311	288.708	184.858	263.68	254.495	235.26	207.682		14.7197	210.964	267.651	213.038	230.038	246.069	165.912	223.32	223.311	276.708	172.858	251.68	242.495	223.26	195.682		14.7197	0.915661	0.926104	0.939929	0.942805	0.941536	0.963691	0.945446	0.911044	0.940495	0.924387	0.932704	0.944226	0.95763	0.940408	0.937576	0.000212997	0.0145944
14.7455	228.208	276.837	230.208	239.961	255.868	178.844	231.664	244.008	290.19	185.467	271.363	250.83	236.988	208.055		14.7455	216.208	264.837	218.208	227.961	243.868	166.844	219.664	232.008	278.19	173.467	259.363	238.83	224.988	196.055		14.7455	0.938422	0.916367	0.962739	0.934293	0.933114	0.969105	0.929968	0.946525	0.945532	0.927644	0.961176	0.929955	0.965042	0.9422	0.943006	0.000260493	0.0161398
14.7839	233.178	281.142	232.571	245.092	249.558	174.565	231.578	235.854	293.687	184.587	267.117	258.087	231.661	218.946		14.7839	221.178	269.142	220.571	233.092	237.558	162.565	219.578	223.854	281.687	172.587	255.117	246.087	219.661	206.946		14.7839	0.959993	0.931263	0.973164	0.955322	0.90897	0.94425	0.929604	0.913259	0.957418	0.922938	0.945441	0.958212	0.942193	0.99454	0.945469	0.000548562	0.0234214
14.806	229.93	288.197	233.296	242.248	258.461	179.587	231.166	239.938	288.286	187.769	268.821	255.533	234.666	214.239		14.806	217.93	276.197	221.296	230.248	246.461	167.587	219.166	227.938	276.286	175.769	256.821	243.533	222.666	202.239		14.806	0.945896	0.955674	0.976363	0.943666	0.943036	0.97342	0.927859	0.92992	0.939061	0.939954	0.951756	0.948268	0.955082	0.971919	0.950134	0.00023133	0.0152095
14.8444	227.25	283.042	231.28	247.487	254.671	173.953	238.528	237.743	290.801	185.783	265.748	256.689	233.26	208.659		14.8444	215.25	271.042	219.28	235.487	242.671	161.953	226.528	225.743	278.801	173.783	253.748	244.689	221.26	196.659		14.8444	0.934264	0.937837	0.967469	0.965138	0.928534	0.940696	0.959027	0.920965	0.947609	0.929334	0.940368	0.952769	0.949051	0.945103	0.944154	0.000190885	0.0138161
14.8703	232.152	286.002	233.199	247.609	258.049	171.689	232.019	242.564	291.85	191.133	267.355	252.008	233.66	214.032		14.8703	220.152	274.002	221.199	235.609	246.049	159.689	220.019	230.564	279.85	179.133	255.355	240.008	221.66	202.032		14.8703	0.95554	0.948079	0.975935	0.965638	0.941459	0.927545	0.931471	0.940634	0.951174	0.957944	0.946323	0.934542	0.950767	0.970924	0.949855	0.000208836	0.0144512
14.9087	223.887	284.944	227.375	245.589	256.565	181.04	229.68	238.276	286.792	183.225	268.384	247.074	237.215	210.335		14.9087	211.887	272.944	215.375	233.589	244.565	169.04	217.68	226.276	274.792	171.225	256.384	235.074	225.215	198.335		14.9087	0.919667	0.944418	0.95024	0.957359	0.935781	0.98186	0.921568	0.92314	0.933983	0.915654	0.950136	0.91533	0.966016	0.953157	0.940594	0.000416805	0.0204158
14.9308	228.258	285.627	227.41	242.614	262.022	177.302	236.262	241.478	304.885	188.755	268.222	257.195	234.923	210.452		14.9308	216.258	273.627	215.41	230.614	250.022	165.302	224.262	229.478	292.885	176.755	256.222	245.195	222.923	198.452		14.9308	0.938639	0.946782	0.950394	0.945166	0.956661	0.960148	0.949434	0.936203	0.995479	0.945227	0.949536	0.954739	0.956185	0.95372	0.952737	0.000197076	0.0140384
14.9692	226.364	282.182	226.732	241.204	261.649	172.266	231.901	240.451	291.538	191.361	267.556	254.254	232.675	210.643		14.9692	214.364	270.182	214.732	229.204	249.649	160.266	219.901	228.451	279.538	179.361	255.556	242.254	220.675	198.643		14.9692	0.930418	0.934861	0.947403	0.939387	0.955234	0.930897	0.930971	0.932013	0.950114	0.959163	0.947068	0.943288	0.946542	0.954638	0.943	9.96148e-05	0.00998072
14.995	231.24	284.996	226.352	245.892	259.195	173.838	234.577	240.778	295.796	185.795	262.462	261.403	231.766	216.024		14.995	219.24	272.996	214.352	233.892	247.195	161.838	222.577	228.778	283.796	173.795	250.462	249.403	219.766	204.024		14.995	0.951582	0.944598	0.945726	0.958601	0.945844	0.940028	0.9423	0.933347	0.964586	0.929398	0.92819	0.971124	0.942643	0.980498	0.948462	0.000237498	0.015411
15.0334	229.075	272.477	222.989	244.986	259.014	171.383	231.009	240.341	289.609	188.065	267.37	253.802	239.105	209.361		15.0334	217.075	260.477	210.989	232.986	247.014	159.383	219.009	228.341	277.609	176.065	255.37	241.802	227.105	197.361		15.0334	0.942185	0.901281	0.930888	0.954888	0.945152	0.925768	0.927195	0.931564	0.943557	0.941537	0.946379	0.941528	0.974122	0.948477	0.939609	0.000274224	0.0165597
15.0555	221.402	279.474	230.841	243.109	255.196	172.923	233.907	237.059	284.418	187.494	264.373	255.866	238.769	214.367		15.0555	209.402	267.474	218.841	231.109	243.196	160.923	221.907	225.059	272.418	175.494	252.373	243.866	226.769	202.367		15.0555	0.908881	0.925491	0.965532	0.947195	0.930543	0.934713	0.939464	0.918175	0.925914	0.938483	0.935272	0.949564	0.972681	0.972534	0.940317	0.00037817	0.0194466
15.0939	226.858	274.256	231.941	243.508	261.202	170.944	233.971	242.636	289.375	185.7	264.144	256.996	240.278	214.184		15.0939	214.858	262.256	219.941	231.508	249.202	158.944	221.971	230.636	277.375	173.7	252.144	244.996	228.278	202.184		15.0939	0.932562	0.907437	0.970385	0.94883	0.953524	0.923218	0.939735	0.940927	0.942762	0.92889	0.934423	0.953964	0.979154	0.971655	0.944819	0.000396113	0.0199026
15.1197	223.728	281.934	231.787	246.357	258.25	174.386	232.316	237.007	296.539	189.061	271.825	255.293	238.317	216.002		15.1197	211.728	269.934	219.787	234.357	246.25	162.386	220.316	225.007	284.539	177.061	259.825	243.293	226.317	204.002		15.1197	0.918977	0.934003	0.969705	0.960507	0.942228	0.943211	0.932728	0.917963	0.967112	0.946863	0.962888	0.947333	0.970742	0.980392	0.949618	0.000382766	0.0195644
15.1581	227.083	283.108	230.648	246.199	257.496	171.46	234.261	236.459	300.364	186.285	266.254	258.968	233.059	215.196		15.1581	215.083	271.108	218.648	234.199	245.496	159.46	222.261	224.459	288.364	174.285	254.254	246.968	221.059	203.196		15.1581	0.933539	0.938066	0.96468	0.959859	0.939343	0.926215	0.940962	0.915727	0.980112	0.932018	0.942243	0.961643	0.948189	0.976518	0.94708	0.000359589	0.0189628
15.1803	227.429	276.32	231.414	244.337	260.753	170.254	236.841	243.151	297.679	189.818	270.457	256.947	238.335	210.113		15.1803	215.429	264.32	219.414	232.337	248.753	158.254	224.841	231.151	285.679	177.818	258.457	244.947	226.335	198.113		15.1803	0.935041	0.914578	0.96806	0.952228	0.951806	0.91921	0.951885	0.943028	0.970986	0.950911	0.957819	0.953774	0.97082	0.952091	0.949445	0.000289475	0.017014
15.2187	226.657	282.022	227.393	240.027	256.706	175.152	240.005	237.675	292.235	181.748	272.703	256.096	235.511	212.302		15.2187	214.657	270.022	215.393	228.027	244.706	163.152	228.005	225.675	280.235	169.748	260.703	244.096	223.511	200.302		15.2187	0.93169	0.934308	0.950319	0.934563	0.936321	0.94766	0.96528	0.920688	0.952483	0.907756	0.966142	0.95046	0.958707	0.96261	0.944213	0.000301748	0.0173709
15.2445	227.514	275.964	234.645	241.343	251.83	170.014	242.334	238.859	288.06	185.045	265.212	256.188	232.683	217.749		15.2445	215.514	263.964	222.645	229.343	239.83	158.014	230.334	226.859	276.06	173.045	253.212	244.188	220.683	205.749		15.2445	0.93541	0.913346	0.982315	0.939957	0.917663	0.917816	0.97514	0.925518	0.938293	0.925387	0.938381	0.950818	0.946576	0.988788	0.942529	0.000586743	0.0242228
15.2829	227.583	274.676	229.118	240.544	255.4	172.676	230.567	240.364	290.388	194.153	266.918	258.607	234.635	213.896		15.2829	215.583	262.676	217.118	228.544	243.4	160.676	218.567	228.364	278.388	182.153	254.918	246.607	222.635	201.896		15.2829	0.935709	0.90889	0.95793	0.936682	0.931323	0.933278	0.925323	0.931658	0.946205	0.974093	0.944703	0.960237	0.954949	0.970271	0.943661	0.000331453	0.0182059
15.305	233.225	277.604	226.537	240.165	258.789	170.119	230.583	241.464	294.977	186.692	262.292	259.019	232.71	214.541		15.305	221.225	265.604	214.537	228.165	246.789	158.119	218.583	229.464	282.977	174.692	250.292	247.019	220.71	202.541		15.305	0.960197	0.919021	0.946542	0.935129	0.944291	0.918426	0.925391	0.936146	0.961803	0.934195	0.92756	0.961842	0.946692	0.973371	0.942186	0.000296849	0.0172293
15.3434	231.896	276.283	230.54	246.085	256.862	171.446	233.994	242.446	292.122	190.217	266.055	251.853	232.672	212.213		15.3434	219.896	264.283	218.54	234.085	244.862	159.446	221.994	230.446	280.122	178.217	254.055	239.853	220.672	200.213		15.3434	0.954429	0.91445	0.964204	0.959392	0.936917	0.926134	0.939832	0.940152	0.952099	0.953045	0.941505	0.933939	0.946529	0.962183	0.944629	0.000201148	0.0141826
15.3711	226.823	279.075	232.283	242.278	261.069	171.623	234.625	241.775	288.937	192.01	268.307	253.818	235.093	211.431		15.3711	214.823	267.075	220.283	230.278	249.069	159.623	222.625	229.775	276.937	180.01	256.307	241.818	223.093	199.431		15.3711	0.93241	0.924111	0.971894	0.943789	0.953015	0.927162	0.942503	0.937415	0.941273	0.962633	0.949851	0.94159	0.956914	0.958425	0.945927	0.000187377	0.0136886
15.4095	224.512	272.646	230.907	238.595	258.343	170.747	233.746	237.611	293.352	188.451	267.659	257.498	235.608	216.489		15.4095	212.512	260.646	218.907	226.595	246.343	158.747	221.746	225.611	281.352	176.451	255.659	245.498	223.608	204.489		15.4095	0.92238	0.901866	0.965823	0.928694	0.942584	0.922074	0.938782	0.920427	0.956279	0.943601	0.94745	0.955919	0.959123	0.982732	0.941981	0.000461202	0.0214756
15.4316	222.66	280.881	235.416	245.056	257.794	173.674	234.862	243.877	291.155	193.073	265.137	256.354	236.334	214.774		15.4316	210.66	268.881	223.416	233.056	245.794	161.674	222.862	231.877	279.155	181.073	253.137	244.354	224.334	202.774		15.4316	0.914341	0.93036	0.985717	0.955175	0.940484	0.939075	0.943507	0.94599	0.948812	0.968318	0.938103	0.951465	0.962237	0.97449	0.949862	0.000342905	0.0185177
15.47	226.411	275.365	227.418	242.333	260.282	172.866	236.889	237.876	285.458	193.451	267.079	258.58	237.973	215.122		15.47	214.411	263.365	215.418	230.333	248.282	160.866	224.889	225.876	273.458	181.451	255.079	246.58	225.973	203.122		15.47	0.930622	0.911274	0.950429	0.944014	0.950003	0.934382	0.952088	0.921508	0.929449	0.970339	0.9453	0.960132	0.969267	0.976163	0.946069	0.000367039	0.0191583
15.4958	223.974	280.174	226.957	244.611	254.1	174.892	239.375	241.706	296.623	185.111	269.876	254.464	234.786	218.226		15.4958	211.974	268.174	214.957	232.611	242.1	162.892	227.375	229.706	284.623	173.111	257.876	242.464	222.786	206.226		15.4958	0.920045	0.927914	0.948395	0.953351	0.926349	0.94615	0.962613	0.937133	0.967397	0.92574	0.955666	0.944105	0.955597	0.99108	0.947252	0.00037454	0.019353
15.5342	234.945	275.998	230.635	239.59	251.146	172.898	235.239	237.525	292.218	186.855	267.58	257.027	237.516	208.688		15.5342	222.945	263.998	218.635	227.59	239.146	160.898	223.239	225.525	280.218	174.855	255.58	245.027	225.516	196.688		15.5342	0.967663	0.913464	0.964623	0.932772	0.915046	0.934568	0.945103	0.920076	0.952425	0.935066	0.947157	0.954085	0.967307	0.945242	0.942471	0.000332237	0.0182274
15.5563	236.65	280.406	229.813	247.598	256.851	170.974	233.026	240.488	283.57	181.477	262.196	250.754	238.148	210.086		15.5563	224.65	268.406	217.813	235.598	244.851	158.974	221.026	228.488	271.57	169.477	250.196	238.754	226.148	198.086		15.5563	0.975063	0.928716	0.960996	0.965593	0.936875	0.923392	0.935734	0.932164	0.923032	0.906306	0.927204	0.929659	0.970018	0.951961	0.94048	0.000427115	0.0206668
15.5947	228.6	279.447	223.364	241.644	257.22	171.135	233.077	240.382	290.843	189.033	259.955	257.001	235.346	211.504		15.5947	216.6	267.447	211.364	229.644	245.22	159.135	221.077	228.382	278.843	177.033	247.955	245.001	223.346	199.504		15.5947	0.940123	0.925398	0.932543	0.941191	0.938287	0.924327	0.93595	0.931732	0.947752	0.946713	0.918899	0.953984	0.957999	0.958775	0.939548	0.000155627	0.0124751
15.6205	229.663	272.264	225.67	246.357	248.76	169.134	234.616	240.119	298.055	193.268	267.353	253.802	238.811	217.659		15.6205	217.663	260.264	213.67	234.357	236.76	157.134	222.616	228.119	286.055	181.268	255.353	241.802	226.811	205.659		15.6205	0.944737	0.900544	0.942717	0.960507	0.905917	0.912705	0.942465	0.930659	0.972264	0.969361	0.946316	0.941528	0.972861	0.988355	0.945067	0.000693161	0.026328
15.659	223.557	284.444	236.72	241.191	258.788	170.628	233.025	234.398	295.879	185.971	268.154	250.984	237.791	208.923		15.659	211.557	272.444	224.72	229.191	246.788	158.628	221.025	222.398	283.879	173.971	256.154	238.984	225.791	196.923		15.659	0.918235	0.942688	0.99147	0.939334	0.944287	0.921382	0.93573	0.907319	0.964868	0.930339	0.949284	0.930555	0.968486	0.946372	0.942168	0.000481176	0.0219357
15.6811	225.689	276.91	234.413	247.063	256.487	170.656	238.147	241.196	292.765	191.241	265.723	252.132	232.425	213.21		15.6811	213.689	264.91	222.413	235.063	244.487	158.656	226.147	229.196	280.765	179.241	253.723	240.132	220.425	201.21		15.6811	0.927488	0.91662	0.981291	0.9634	0.935483	0.921545	0.957414	0.935053	0.954284	0.958521	0.940275	0.935025	0.94547	0.966974	0.945632	0.000348449	0.0186668
15.7195	225.487	278.436	234.609	244.189	263.91	178.937	232.916	247.695	292.911	188.228	270.026	253.985	230.75	210.63		15.7195	213.487	266.436	222.609	232.189	251.91	166.937	220.916	235.695	280.911	176.228	258.026	241.985	218.75	198.63		15.7195	0.926612	0.9219	0.982156	0.951621	0.963885	0.969645	0.935268	0.961567	0.954781	0.942409	0.956221	0.94224	0.938285	0.954575	0.950083	0.000280022	0.0167339
15.7453	219.464	279.642	235.014	247.01	260.621	176.798	234.208	241.961	290.001	190.923	270.452	252.452	239.784	216.054		15.7453	207.464	267.642	223.014	235.01	248.621	164.798	222.208	229.961	278.001	178.923	258.452	240.452	227.784	204.054		15.7453	0.90047	0.926073	0.983943	0.963183	0.951301	0.957221	0.940738	0.938174	0.94489	0.956821	0.9578	0.936271	0.977035	0.980642	0.95104	0.000508291	0.0225453
15.7837	225.231	280.072	228.151	238.17	258.317	172.382	236.074	236.736	288.401	188.478	267.99	247.784	237.379	213.037		15.7837	213.231	268.072	216.151	226.17	246.317	160.382	224.074	224.736	276.401	176.478	255.99	235.784	225.379	201.037		15.7837	0.925501	0.927561	0.953663	0.926953	0.942485	0.931571	0.948638	0.916857	0.939452	0.943745	0.948676	0.918095	0.966719	0.966143	0.939718	0.000259616	0.0161126
15.8058	223.556	276.676	230.386	243.099	249.921	178.091	230.162	244.962	289.598	190.272	264.501	250.694	236.612	211.407		15.8058	211.556	264.676	218.386	231.099	237.921	166.091	218.162	232.962	277.598	178.272	252.501	238.694	224.612	199.407		15.8058	0.91823	0.91581	0.963524	0.947154	0.910359	0.964731	0.923609	0.950417	0.94352	0.953339	0.935746	0.929426	0.963429	0.958309	0.941257	0.000362559	0.019041
15.8442	219.883	281.511	232.951	239.039	253.362	175.206	234.088	236.803	293.706	187.425	263.388	252.99	230.551	210.993		15.8442	207.883	269.511	220.951	227.039	241.362	163.206	222.088	224.803	281.706	175.425	251.388	240.99	218.551	198.993		15.8442	0.902288	0.93254	0.974841	0.930514	0.923525	0.947974	0.94023	0.91713	0.957483	0.938114	0.931622	0.938366	0.937432	0.95632	0.937741	0.000324872	0.0180242
15.87	230.26	287.896	228.512	241.958	254.776	176.554	234.025	248.107	292.499	189.243	263.964	254.668	234.042	215.014		15.87	218.26	275.896	216.512	229.958	242.776	164.554	222.025	236.107	280.499	177.243	251.964	242.668	222.042	203.014		15.87	0.947328	0.954633	0.955256	0.942478	0.928936	0.955803	0.939963	0.963247	0.95338	0.947836	0.933756	0.9449	0.952406	0.975644	0.949683	0.000141107	0.0118788
15.9084	230.026	281.104	230.77	243.514	257.234	176.604	230.917	237.402	290.428	189.259	266.534	255.07	235.665	213.251		15.9084	218.026	269.104	218.77	231.514	245.234	164.604	218.917	225.402	278.428	177.259	254.534	243.07	223.665	201.251		15.9084	0.946313	0.931131	0.965218	0.948855	0.938341	0.956094	0.926805	0.919574	0.946341	0.947922	0.94328	0.946465	0.959367	0.967171	0.94592	0.000189554	0.0137679
15.9306	221.325	272.893	231.182	238.742	257.811	175.482	232.101	241.863	289.028	187.645	268.559	255.992	232.842	215.9		15.9306	209.325	260.893	219.182	226.742	245.811	163.482	220.101	229.863	277.028	175.645	256.559	243.992	220.842	203.9		15.9306	0.908547	0.90272	0.967036	0.929297	0.940549	0.949577	0.931818	0.937774	0.941583	0.939291	0.950785	0.950055	0.947258	0.979902	0.941156	0.000402693	0.0200672
15.969	226.09	276.449	229.702	244.087	253.753	174.155	235.174	238.698	284.052	189.6	264.269	255.474	233.015	214.631		15.969	214.09	264.449	217.702	232.087	241.753	162.155	223.174	226.698	272.052	177.6	252.269	243.474	221.015	202.631		15.969	0.929229	0.915025	0.960506	0.951203	0.925021	0.941869	0.944828	0.924862	0.92467	0.949746	0.934887	0.948038	0.948001	0.973803	0.940835	0.000260291	0.0161335
15.9948	228.788	284.455	231.403	236.039	254.676	170.075	235.127	238.089	293.286	189.103	264.111	249.003	229.64	210.293		15.9948	216.788	272.455	219.403	224.039	242.676	158.075	223.127	226.089	281.286	177.103	252.111	237.003	217.64	198.293		15.9948	0.940939	0.942726	0.968011	0.918219	0.928553	0.91817	0.944629	0.922377	0.956055	0.947088	0.934301	0.922841	0.933524	0.952956	0.937885	0.000229922	0.0151632
16.0332	223.933	281.184	229.241	243.813	254.547	171.986	236.368	234.317	289.889	187.358	262.806	260.348	242.084	216.13		16.0332	211.933	269.184	217.241	231.813	242.547	159.986	224.368	222.317	277.889	175.358	250.806	248.348	230.084	204.13		16.0332	0.919867	0.931408	0.958472	0.95008	0.92806	0.92927	0.949882	0.906988	0.944509	0.937756	0.929465	0.967016	0.9869	0.981007	0.944334	0.000527044	0.0229574
16.0553	226.041	281.806	225.31	242.256	260.708	168.498	231.443	244.099	288.979	184.791	269.027	253.448	230.803	211.119		16.0553	214.041	269.806	213.31	230.256	248.708	156.498	219.443	232.099	276.979	172.791	257.027	241.448	218.803	199.119		16.0553	0.929016	0.93356	0.941129	0.943699	0.951633	0.90901	0.929032	0.946896	0.941416	0.924029	0.952519	0.940149	0.938513	0.956925	0.938395	0.000162081	0.0127311
16.0937	222.613	280.676	227.508	246.819	264.542	171.455	230.108	237.196	291.556	183.95	268.689	259.18	240.611	207.342		16.0937	210.613	268.676	215.508	234.819	252.542	159.455	218.108	225.196	279.556	171.95	256.689	247.18	228.611	195.342		16.0937	0.914137	0.929651	0.950826	0.9624	0.966304	0.926186	0.92338	0.918734	0.950175	0.919531	0.951267	0.962468	0.980582	0.938774	0.942458	0.000440324	0.0209839
16.1195	227.444	274.572	229.876	250.146	258.449	173.344	233.552	239.915	293.414	187.453	269.697	254.541	240.438	217.44		16.1195	215.444	262.572	217.876	238.146	246.449	161.344	221.552	227.915	281.414	175.453	257.697	242.541	228.438	205.44		16.1195	0.935106	0.90853	0.961274	0.976036	0.94299	0.937158	0.937961	0.929827	0.95649	0.938264	0.955002	0.944405	0.97984	0.987303	0.949299	0.000463365	0.0215259
16.1579	229.854	276.591	231.154	240.801	256.703	167.823	228.153	245.212	292.052	183.101	274.819	260.941	231.025	211.894		16.1579	217.854	264.591	219.154	228.801	244.703	155.823	216.153	233.212	280.052	171.101	262.819	248.941	219.025	199.894		16.1579	0.945566	0.915516	0.966913	0.937736	0.936309	0.90509	0.915104	0.951437	0.951861	0.914991	0.973984	0.969325	0.939465	0.96065	0.94171	0.000500738	0.0223772
16.18	232.609	282.783	227.141	238.821	256.111	177.232	234.915	239.889	292.425	186.568	274.72	260.266	233.787	213.166		16.18	220.609	270.783	215.141	226.821	244.111	165.232	222.915	227.889	280.425	174.568	262.72	248.266	221.787	201.166		16.18	0.957524	0.936941	0.949207	0.929621	0.934044	0.959741	0.943731	0.92972	0.953129	0.933531	0.973617	0.966697	0.951312	0.966763	0.94897	0.000217581	0.0147506
16.2184	227.111	282.247	229.478	241.686	258.253	174.034	223.552	238.159	290.344	189.469	268.46	257.778	238.583	216.161		16.2184	215.111	270.247	217.478	229.686	246.253	162.034	211.552	226.159	278.344	177.469	256.46	245.778	226.583	204.161		16.2184	0.93366	0.935086	0.959518	0.941363	0.94224	0.941166	0.895625	0.922663	0.946056	0.949045	0.950418	0.957009	0.971883	0.981156	0.944778	0.000433107	0.0208112
16.2461	231.618	276.595	227.765	241.656	259.235	173.293	231.633	241.092	292.316	187.354	270.053	252.43	233.472	217.941		16.2461	219.618	264.595	215.765	229.656	247.235	161.293	219.633	229.092	280.316	175.354	258.053	240.43	221.472	205.941		16.2461	0.953222	0.91553	0.95196	0.94124	0.945997	0.936862	0.929836	0.934628	0.952758	0.937735	0.956322	0.936185	0.949961	0.98971	0.945139	0.000288124	0.0169742
16.2845	224.704	283.019	229.388	242.287	253.815	173.161	230.984	248.045	293.092	190.615	272.415	258.825	227.68	214.734		16.2845	212.704	271.019	217.388	230.287	241.815	161.161	218.984	236.045	281.092	178.615	260.415	246.825	215.68	202.734		16.2845	0.923213	0.937758	0.959121	0.943826	0.925259	0.936095	0.927089	0.962995	0.955396	0.955173	0.965075	0.961086	0.925117	0.974298	0.946536	0.000302735	0.0173993
16.3066	223.558	274.073	234.724	244.22	261.383	172.448	232.838	240.452	286.655	192.405	271.042	257.682	234.23	222.199		16.3066	211.558	262.073	222.724	232.22	249.383	160.448	220.838	228.452	274.655	180.405	259.042	245.682	222.23	210.199		16.3066	0.918239	0.906803	0.982664	0.951748	0.954216	0.931954	0.934938	0.932017	0.933517	0.964746	0.959987	0.956635	0.953212	1.01017	0.949346	0.000699723	0.0264523
16.345	226.784	279.186	234.071	245.706	255.831	176.586	233.655	241.504	288.918	191.7	272.126	255.814	237.562	213.678		16.345	214.784	267.186	222.071	233.706	243.831	164.586	221.655	229.504	276.918	179.7	260.126	243.814	225.562	201.678		16.345	0.932241	0.924495	0.979782	0.957839	0.932973	0.955989	0.938397	0.936309	0.941209	0.960976	0.964004	0.949362	0.967504	0.969223	0.950736	0.000278831	0.0166982
16.3708	224.374	279.214	233.144	243.467	255.183	171.702	237.69	237.634	296.809	186.647	272.244	252.552	240.556	212.831		16.3708	212.374	267.214	221.144	231.467	243.183	159.702	225.69	225.634	284.809	174.647	260.244	240.552	228.556	200.831		16.3708	0.921781	0.924592	0.975693	0.948662	0.930493	0.927621	0.955479	0.920521	0.968029	0.933954	0.964441	0.93666	0.980346	0.965153	0.946673	0.000449905	0.021211
16.4092	223.477	283.272	234.043	238.073	258.392	176.106	234.007	241.179	290.522	187.744	269.495	256.22	238.864	213.106		16.4092	211.477	271.272	222.043	226.073	246.392	164.106	222.007	229.179	278.522	175.744	257.495	244.22	226.864	201.106		16.4092	0.917888	0.938633	0.979659	0.926555	0.942772	0.953201	0.939887	0.934983	0.946661	0.93982	0.954254	0.950943	0.973089	0.966474	0.947487	0.000294604	0.017164
16.4314	224.48	285.095	232.84	242.134	258.4	177.061	231.142	239.213	288.516	189.819	269.451	249.444	236.33	209.15		16.4314	212.48	273.095	220.84	230.134	246.4	165.061	219.142	227.213	276.516	177.819	257.451	237.444	224.33	197.15		16.4314	0.922241	0.944941	0.974351	0.943199	0.942802	0.958748	0.927758	0.926963	0.939842	0.950917	0.954091	0.924558	0.96222	0.947463	0.944292	0.000235145	0.0153344
16.4698	221.306	279.145	232.181	241.943	252.769	171.222	237.109	246.449	293.531	185.629	274.056	253.831	234.744	214.095		16.4698	209.306	267.145	220.181	229.943	240.769	159.222	225.109	234.449	281.531	173.629	262.056	241.831	222.744	202.095		16.4698	0.908465	0.924353	0.971444	0.942416	0.921256	0.924833	0.95302	0.956483	0.956888	0.92851	0.971156	0.94164	0.955417	0.971227	0.944793	0.000426015	0.0206401
16.4956	227.488	276.15	227.972	243.872	255.961	171.2	234.821	244.751	284.918	191.447	269.721	251.427	234.653	211.556		16.4956	215.488	264.15	215.972	231.872	243.961	159.2	222.821	232.751	272.918	179.447	257.721	239.427	222.653	199.556		16.4956	0.935297	0.91399	0.952874	0.950322	0.93347	0.924705	0.943333	0.949556	0.927613	0.959623	0.955091	0.93228	0.955026	0.959025	0.9423	0.000206878	0.0143833
16.534	219.248	279.305	233.521	242.788	260.004	176.255	234.999	247.654	290.059	183.589	267.864	252.572	231.783	215.071		16.534	207.248	267.305	221.521	230.788	248.004	164.255	222.999	235.654	278.059	171.589	255.864	240.572	219.783	203.071		16.534	0.899532	0.924907	0.977356	0.945879	0.94894	0.954067	0.944087	0.961399	0.945087	0.917601	0.948209	0.936738	0.942716	0.975918	0.94446	0.00043635	0.020889
16.5561	225.959	278.896	233.887	244.907	259.773	172.474	234.248	244.783	285.387	181.991	266.337	252.764	228.539	215.79		16.5561	213.959	266.896	221.887	232.907	247.773	160.474	222.248	232.783	273.387	169.991	254.337	240.764	216.539	203.79		16.5561	0.92866	0.923492	0.978971	0.954564	0.948056	0.932105	0.940907	0.949687	0.929207	0.909055	0.94255	0.937486	0.928802	0.979373	0.941637	0.00039068	0.0197656
16.5945	224.288	275.726	230.055	244.671	257.376	172.733	233.307	242.109	289.786	190.833	266.784	261.246	234.151	216.925		16.5945	212.288	263.726	218.055	232.671	245.376	160.733	221.307	230.109	277.786	178.833	254.784	249.246	222.151	204.925		16.5945	0.921408	0.912523	0.962064	0.953597	0.938884	0.933609	0.936923	0.938777	0.944159	0.956339	0.944207	0.970513	0.952873	0.984828	0.946479	0.000357383	0.0189046
16.6203	229.052	278.524	236.027	241.592	251.039	174.278	235.58	237.409	290.209	187.627	266.862	255.092	238.652	212.455		16.6203	217.052	266.524	224.027	229.592	239.039	162.278	223.58	225.409	278.209	175.627	254.862	243.092	226.652	200.455		16.6203	0.942085	0.922204	0.988412	0.940978	0.914637	0.942583	0.946546	0.919603	0.945597	0.939195	0.944496	0.946551	0.972179	0.963346	0.944887	0.000393534	0.0198377
16.6587	226.775	277.884	228.56	244.264	252.587	174.343	233.602	241.43	298.101	188.943	267.755	258.264	237.564	210.639		16.6587	214.775	265.884	216.56	232.264	240.587	162.343	221.602	229.43	286.101	176.943	255.755	246.264	225.564	198.639		16.6587	0.932202	0.91999	0.955468	0.951929	0.92056	0.942961	0.938172	0.936007	0.972421	0.946232	0.947805	0.958902	0.967513	0.954618	0.946056	0.000247238	0.0157238
16.6808	232.7	282.058	231.28	241.527	258.579	173.987	235.849	247.564	289.253	191.998	264.421	256.453	228.54	214.215		16.6808	220.7	270.058	219.28	229.527	246.579	161.987	223.849	235.564	277.253	179.998	252.421	244.453	216.54	202.215		16.6808	0.957919	0.934432	0.967469	0.940711	0.943487	0.940893	0.947685	0.961032	0.942347	0.962569	0.93545	0.95185	0.928806	0.971804	0.949032	0.000176314	0.0132783
16.7193	223.885	280.098	231.162	245.913	260.362	171.24	232.306	243.034	295.728	194.345	268.7	255.312	234.087	216.646		16.7193	211.885	268.098	219.162	233.913	248.362	159.24	220.306	231.034	283.728	182.345	256.7	243.312	222.087	204.646		16.7193	0.919658	0.927651	0.966948	0.958687	0.95031	0.924937	0.932686	0.942551	0.964355	0.97512	0.951307	0.947407	0.952599	0.983487	0.949836	0.000364584	0.0190941
16.7577	223.187	276.715	231.731	242.232	257.986	169.897	228.362	237.163	299.872	190.797	270.992	259.187	234.702	211.859		16.7577	211.187	264.715	219.731	230.232	245.986	157.897	216.362	225.163	287.872	178.797	258.992	247.187	222.702	199.859		16.7577	0.916629	0.915945	0.969458	0.943601	0.941218	0.917137	0.915988	0.918599	0.97844	0.956147	0.959801	0.962496	0.955237	0.960481	0.943655	0.000512728	0.0226435
16.7835	232.296	281.121	232.367	244.432	255.369	173.787	233.837	240.05	284.7	189.665	267.038	260.531	231.571	214.304		16.7835	220.296	269.121	220.367	232.432	243.369	161.787	221.837	228.05	272.7	177.665	255.038	248.531	219.571	202.304		16.7835	0.956165	0.93119	0.972264	0.952617	0.931205	0.939731	0.939167	0.930377	0.926872	0.950093	0.945148	0.967729	0.941807	0.972232	0.9469	0.000242696	0.0155787
16.8056	226.713	278.98	232.491	241.901	261.326	174.685	231.973	239.214	288.807	183.952	270.229	258.652	238.048	216.529		16.8056	214.713	266.98	220.491	229.901	249.326	162.685	219.973	227.214	276.807	171.952	258.229	246.652	226.048	204.529		16.8056	0.931933	0.923782	0.972811	0.942244	0.953998	0.944947	0.931276	0.926967	0.940832	0.919542	0.956974	0.960412	0.969589	0.982925	0.947017	0.000386837	0.0196682
16.844	226.716	279.675	228.589	243.427	253.845	175.525	228.222	246.226	290.024	188.283	267.19	251.906	229.77	210.556		16.844	214.716	267.675	216.589	231.427	241.845	163.525	216.222	234.226	278.024	176.283	255.19	239.906	217.77	198.556		16.844	0.931946	0.926187	0.955596	0.948498	0.925373	0.949826	0.915396	0.955574	0.944968	0.942703	0.945711	0.934145	0.934082	0.95422	0.940302	0.000158796	0.0126014
16.8698	226.66	286.299	231.61	241.275	259.25	177.258	228.702	245.263	291.752	191.569	274.484	254.784	233.898	209.444		16.8698	214.66	274.299	219.61	229.275	247.25	165.258	216.702	233.263	279.752	179.569	262.484	242.784	221.898	197.444		16.8698	0.931703	0.949107	0.968924	0.939678	0.946055	0.959892	0.917428	0.951645	0.950841	0.960275	0.972742	0.945351	0.951788	0.948875	0.949593	0.000201892	0.0142089
16.9082	226.766	283.565	229.107	241.826	265.311	177.313	224.052	241.092	290.824	188.127	271.37	260.131	236.575	217.515		16.9082	214.766	271.565	217.107	229.826	253.311	165.313	212.052	229.092	278.824	176.127	259.37	248.131	224.575	205.515		16.9082	0.932163	0.939647	0.957881	0.941937	0.969246	0.960212	0.897742	0.934628	0.947687	0.941868	0.961202	0.966171	0.96327	0.987663	0.950094	0.000465182	0.0215681
16.9303	227.892	282.78	234.632	241.693	264.763	176.238	230.815	241.777	285.275	185.832	260.592	249.65	240.847	214.789		16.9303	215.892	270.78	222.632	229.693	252.763	164.238	218.815	229.777	273.275	173.832	248.592	237.65	228.847	202.789		16.9303	0.93705	0.936931	0.982258	0.941391	0.967149	0.953968	0.926373	0.937423	0.928827	0.929596	0.92126	0.925361	0.981594	0.974562	0.945982	0.000473277	0.0217549
16.9687	229.554	279.298	231.866	237.957	259.265	168.911	231.703	236.279	290.355	185.727	272.221	259.408	234.268	211.539		16.9687	217.554	267.298	219.866	225.957	247.265	156.911	219.703	224.279	278.355	173.727	260.221	247.408	222.268	199.539		16.9687	0.944264	0.924883	0.970054	0.92608	0.946112	0.911409	0.930133	0.914993	0.946093	0.929034	0.964356	0.963356	0.953375	0.958944	0.941649	0.000362849	0.0190486
16.9945	229.043	276.72	235.02	242.176	256.33	169.901	229.655	243.729	289.266	189.249	263.192	256.12	233.194	210.173		16.9945	217.043	264.72	223.02	230.176	244.33	157.901	217.655	231.729	277.266	177.249	251.192	244.12	221.194	198.173		16.9945	0.942046	0.915962	0.983969	0.943371	0.934882	0.91716	0.921462	0.945387	0.942392	0.947869	0.930895	0.950553	0.948768	0.952379	0.941221	0.000301412	0.0173612
17.033	223.919	281.59	230.925	244.49	264.453	171.493	231.292	234.007	290.477	187.003	269.428	255.687	234.034	214.145		17.033	211.919	269.59	218.925	232.49	252.453	159.493	219.292	222.007	278.477	175.003	257.428	243.687	222.034	202.145		17.033	0.919806	0.932813	0.965902	0.952855	0.965963	0.926407	0.928393	0.905724	0.946508	0.935858	0.954005	0.948867	0.952371	0.971468	0.943353	0.000368018	0.0191838
17.0551	224.319	278.974	232.421	245.792	260.55	175.566	231.853	239.854	303.901	189.815	267.54	260.483	237.2	209.583		17.0551	212.319	266.974	220.421	233.792	248.55	163.566	219.853	227.854	291.901	177.815	255.54	248.483	225.2	197.583		17.0551	0.921542	0.923761	0.972503	0.958191	0.951029	0.950065	0.930768	0.929578	0.992134	0.950895	0.947009	0.967542	0.965951	0.949543	0.950751	0.000399947	0.0199987
17.0935	228.257	281.1	231.858	246.969	259.914	172.091	231.568	244.532	292.826	187.316	273.273	254.568	239.086	217.261		17.0935	216.257	269.1	219.858	234.969	247.914	160.091	219.568	232.532	280.826	175.316	261.273	242.568	227.086	205.261		17.0935	0.938634	0.931118	0.970019	0.963015	0.948595	0.92988	0.929561	0.948663	0.954492	0.937532	0.968255	0.94451	0.974041	0.986442	0.951768	0.000329493	0.0181519
17.1211	224.842	281.795	230.831	236.755	256.956	174.259	235.671	240.028	290.187	190.347	268.436	255.968	231.246	214.502		17.1211	212.842	269.795	218.831	224.755	244.956	162.259	223.671	228.028	278.187	178.347	256.436	243.968	219.246	202.502		17.1211	0.923812	0.933522	0.965488	0.921153	0.937277	0.942473	0.946932	0.930288	0.945522	0.95374	0.950329	0.949962	0.940413	0.973183	0.943864	0.000214018	0.0146293
17.1595	220.929	267.052	232.636	239.585	253.416	170.164	229.916	243.41	292.055	189.58	268.996	262.879	237.359	218.868		17.1595	208.929	255.052	220.636	227.585	241.416	158.164	217.916	231.41	280.055	177.58	256.996	250.879	225.359	206.868		17.1595	0.906828	0.88251	0.973451	0.932752	0.923732	0.918687	0.922567	0.944085	0.951871	0.949639	0.952404	0.976872	0.966633	0.994165	0.942586	0.000916406	0.0302722
17.1817	227.557	274.574	230.625	240.751	255.119	173.014	233.548	246.045	291.638	181.285	272.82	256.773	238.726	212.308		17.1817	215.557	262.574	218.625	228.751	243.119	161.014	221.548	234.045	279.638	169.285	260.82	244.773	226.726	200.308		17.1817	0.935596	0.908537	0.964579	0.937531	0.930248	0.935241	0.937944	0.954835	0.950454	0.90528	0.966576	0.953096	0.972497	0.962639	0.943932	0.000423556	0.0205805
17.2201	227.469	271.789	233.586	244.726	259.743	171.959	236.439	249.797	292.145	187.511	264.399	253.845	242.421	213.451		17.2201	215.469	259.789	221.586	232.726	247.743	159.959	224.439	237.797	280.145	175.511	252.399	241.845	230.421	201.451		17.2201	0.935214	0.8989	0.977643	0.953822	0.947941	0.929114	0.950183	0.970142	0.952177	0.938574	0.935368	0.941695	0.988346	0.968132	0.949089	0.000512357	0.0226353
17.2459	224.423	274.261	228.72	239.726	256.537	172.078	231.397	246.505	287.591	190.385	267.826	253.408	237.579	217.084		17.2459	212.423	262.261	216.72	227.726	244.537	160.078	219.397	234.505	275.591	178.385	255.826	241.408	225.579	205.084		17.2459	0.921994	0.907454	0.956174	0.93333	0.935674	0.929805	0.928837	0.956712	0.936699	0.953943	0.948068	0.939993	0.967577	0.985592	0.942989	0.00040004	0.020001
17.2843	220.076	274.441	234.23	245.379	259.75	170.773	228.709	239.104	285.822	190.974	270.11	254.465	236.832	218.026		17.2843	208.076	262.441	222.23	233.379	247.75	158.773	216.709	227.104	273.822	178.974	258.11	242.465	224.832	206.026		17.2843	0.903126	0.908077	0.980484	0.956498	0.947968	0.922225	0.917457	0.926518	0.930686	0.957093	0.956533	0.944109	0.964373	0.990119	0.943233	0.000691388	0.0262943
17.3064	230.538	270.435	228.696	243.277	257.954	177.162	234.577	244.566	291.028	185.87	269.794	259.027	235.48	214.15		17.3064	218.538	258.435	216.696	231.277	245.954	165.162	222.577	232.566	279.028	173.87	257.794	247.027	223.48	202.15		17.3064	0.948535	0.894215	0.956068	0.947883	0.941096	0.959335	0.9423	0.948801	0.94838	0.929799	0.955362	0.961873	0.958574	0.971492	0.947408	0.00033879	0.0184062
17.3448	230.63	284.362	230.269	243.376	258.189	176.738	227.788	236.404	296.972	187.172	267.278	258.442	233.304	215.224		17.3448	218.63	272.362	218.269	231.376	246.189	164.738	215.788	224.404	284.972	175.172	255.278	246.442	221.304	203.224		17.3448	0.948934	0.942405	0.963008	0.948289	0.941995	0.956872	0.913558	0.915503	0.968583	0.936761	0.946038	0.959595	0.94924	0.976653	0.947674	0.000317223	0.0178108
17.3706	230.668	278.501	230.038	241.077	256.465	172.182	235.063	241.673	291.667	189.272	267.853	250.338	234.184	210.21		17.3706	218.668	266.501	218.038	229.077	244.465	160.182	223.063	229.673	279.667	177.272	255.853	238.338	222.184	198.21		17.3706	0.949099	0.922125	0.961989	0.938867	0.935398	0.930409	0.944358	0.936999	0.950552	0.947992	0.948168	0.928039	0.953015	0.952557	0.942826	0.000125269	0.0111924
17.409	224.63	278.39	229.713	242.31	259.075	172.758	235.316	236.048	294.459	186.3	274.625	254.885	236.154	217.666		17.409	212.63	266.39	217.713	230.31	247.075	160.758	223.316	224.048	282.459	174.3	262.625	242.885	224.154	205.666		17.409	0.922892	0.921741	0.960555	0.94392	0.945385	0.933754	0.945429	0.91405	0.960042	0.932098	0.973265	0.945745	0.961465	0.988389	0.946338	0.000436796	0.0208997
17.4311	228.256	276.743	228.905	245.137	255.468	175.756	231.791	243.401	292.901	186.045	264.588	254.9	240.261	214.2		17.4311	216.256	264.743	216.905	233.137	243.468	163.756	219.791	231.401	280.901	174.045	252.588	242.9	228.261	202.2		17.4311	0.93863	0.916042	0.95699	0.955507	0.931584	0.951168	0.930505	0.944048	0.954747	0.930735	0.936069	0.945803	0.979081	0.971732	0.945903	0.000292764	0.0171103
17.4537	230.128	281.374	234.872	244.627	257.179	171.492	237.945	240.197	293.187	186.283	264.433	255.744	229.525	210.383		17.4537	218.128	269.374	222.872	232.627	245.179	159.492	225.945	228.197	281.187	174.283	252.433	243.744	217.525	198.383		17.4537	0.946755	0.932066	0.983317	0.953416	0.93813	0.926401	0.956559	0.930977	0.955719	0.932007	0.935494	0.949089	0.933031	0.953388	0.944739	0.000233552	0.0152824
17.4921	229.914	282.397	231.73	245.749	260.702	174.186	235.329	244.651	290.388	186.048	262.141	261.035	232.989	209.691		17.4921	217.914	270.397	219.73	233.749	248.702	162.186	223.329	232.651	278.388	174.048	250.141	249.035	220.989	197.691		17.4921	0.945826	0.935605	0.969454	0.958015	0.95161	0.942049	0.945484	0.949148	0.946205	0.930751	0.927	0.969691	0.947889	0.950062	0.947771	0.000153139	0.012375
17.5142	232.139	281.96	241.342	243.83	258.677	172.3	235.141	237.188	291.014	193.311	269.892	257.844	234.28	217.415		17.5142	220.139	269.96	229.342	231.83	246.677	160.3	223.141	225.188	279.014	181.311	257.892	245.844	222.28	205.415		17.5142	0.955484	0.934093	1.01186	0.95015	0.943862	0.931094	0.944688	0.918701	0.948333	0.969591	0.955725	0.957266	0.953426	0.987182	0.95439	0.000546895	0.0233858
17.5526	230.367	271.269	235.008	241.18	258.99	171.863	232.675	241.375	294.408	189.065	264.935	256.412	237.603	214.982		17.5526	218.367	259.269	223.008	229.18	246.99	159.863	220.675	229.375	282.408	177.065	252.935	244.412	225.603	202.982		17.5526	0.947793	0.897101	0.983917	0.939289	0.94506	0.928556	0.934248	0.935783	0.959869	0.946885	0.937355	0.95169	0.96768	0.97549	0.94648	0.000466261	0.0215931
17.5747	232.154	283.116	225.828	244.203	256.781	174.951	238.463	236.235	285.852	191.17	269.152	252.232	231.591	214.041		17.5747	220.154	271.116	213.828	232.203	244.781	162.951	226.463	224.235	273.852	179.17	257.152	240.232	219.591	202.041		17.5747	0.955549	0.938093	0.943414	0.951679	0.936608	0.946492	0.958752	0.914813	0.930788	0.958141	0.952982	0.935414	0.941893	0.970968	0.945399	0.00019932	0.0141181
17.6131	227.399	272.397	232.523	241.429	263.975	169.871	240.156	242.066	292.557	191.763	269.466	255.796	234.538	211.438		17.6131	215.399	260.397	220.523	229.429	251.975	157.871	228.156	230.066	280.557	179.763	257.466	243.796	222.538	199.438		17.6131	0.93491	0.901004	0.972953	0.940309	0.964134	0.916985	0.965919	0.938602	0.953577	0.961313	0.954146	0.949292	0.954533	0.958458	0.947581	0.000391594	0.0197887
17.6352	224.48	276.733	239.002	244.185	252.842	168.422	234.426	239.793	290.351	192.822	270.514	257.01	234.64	211.308		17.6352	212.48	264.733	227.002	232.185	240.842	156.422	222.426	227.793	278.351	180.822	258.514	245.01	222.64	199.308		17.6352	0.922241	0.916007	1.00154	0.951605	0.921536	0.908569	0.941661	0.929329	0.946079	0.966976	0.95803	0.954019	0.954971	0.957833	0.945028	0.000594814	0.0243888
17.6737	231.61	280.846	230.068	237.543	258.199	171.135	237.548	239.445	296.704	182.579	266.088	253.739	233.957	203.03		17.6737	219.61	268.846	218.068	225.543	246.199	159.135	225.548	227.445	284.704	170.579	254.088	241.739	221.957	191.03		17.6737	0.953188	0.930239	0.962121	0.924383	0.942033	0.924327	0.954878	0.927909	0.967672	0.9122	0.941628	0.941282	0.952041	0.918051	0.939425	0.000291138	0.0170628
17.6958	221.898	274.833	234.88	239.761	259.987	172.151	234.221	239.212	289.059	188.377	266.639	253.996	230.374	213.24		17.6958	209.898	262.833	222.88	227.761	247.987	160.151	222.221	227.212	277.059	176.377	254.639	241.996	218.374	201.24		17.6958	0.911034	0.909433	0.983352	0.933473	0.948875	0.930229	0.940793	0.926958	0.941688	0.943205	0.94367	0.942283	0.936672	0.967118	0.939913	0.00037065	0.0192523
17.7342	226.498	280.74	230.15	246.626	259.552	172.135	233.838	236.204	286.735	187.06	276.961	257.846	232.687	210.796		17.7342	214.498	268.74	218.15	234.626	247.552	160.135	221.838	224.204	274.735	175.06	264.961	245.846	220.687	198.796		17.7342	0.931	0.929872	0.962483	0.961609	0.94721	0.930136	0.939172	0.914687	0.933789	0.936162	0.981922	0.957274	0.946594	0.955373	0.944806	0.000308643	0.0175682
17.7563	224.71	277.197	229.482	245.157	259.731	175.875	235.861	243.056	283.511	184.267	267.056	248.921	228.75	216.852		17.7563	212.71	265.197	217.482	233.157	247.731	163.875	223.861	231.056	271.511	172.267	255.056	236.921	216.75	204.852		17.7563	0.923239	0.917613	0.959536	0.955589	0.947895	0.951859	0.947736	0.942641	0.922831	0.921226	0.945215	0.922522	0.929707	0.984477	0.940863	0.000363858	0.0190751
17.7947	228.17	277.194	235.037	245.603	261.3	168.335	235.871	243.102	290.988	192.764	270.784	251.466	231.989	213.547		17.7947	216.17	265.194	223.037	233.603	249.3	156.335	223.871	231.102	278.988	180.764	258.784	239.466	219.989	201.547		17.7947	0.938257	0.917602	0.984044	0.957416	0.953899	0.908064	0.947778	0.942829	0.948244	0.966666	0.959031	0.932432	0.9436	0.968594	0.947747	0.000401414	0.0200353
17.8205	227.17	279.22	228.068	247.053	256.68	175.19	228.266	238.433	284.604	186.941	275.289	253.774	232.332	210.558		17.8205	215.17	267.22	216.068	235.053	244.68	163.19	216.266	226.433	272.604	174.941	263.289	241.774	220.332	198.558		17.8205	0.933916	0.924613	0.953297	0.963359	0.936221	0.947881	0.915582	0.92378	0.926546	0.935526	0.975726	0.941419	0.945071	0.954229	0.941226	0.000278342	0.0166836
17.8589	229.28	277.255	226.354	237.415	259.554	181.01	234.089	245.304	282.501	188.606	263.811	253.173	235.855	207.66		17.8589	217.28	265.255	214.354	225.415	247.554	169.01	222.089	233.304	270.501	176.606	251.811	241.173	223.855	195.66		17.8589	0.943075	0.917813	0.945735	0.923858	0.947218	0.981686	0.940234	0.951812	0.919398	0.94443	0.933189	0.939078	0.960182	0.940302	0.942001	0.000274399	0.016565
17.881	220.822	275.458	230.562	242.688	254.91	172.921	232.987	236.173	288.462	186.5	267.381	255.063	231.078	214.579		17.881	208.822	263.458	218.562	230.688	242.91	160.921	220.987	224.173	276.462	174.5	255.381	243.063	219.078	202.579		17.881	0.906364	0.911596	0.964301	0.945469	0.929449	0.934701	0.935569	0.91456	0.939659	0.933168	0.946419	0.946438	0.939692	0.973553	0.93721	0.000347018	0.0186284
17.9195	222.37	278.238	232.972	237.862	253.41	170.923	233.273	247.68	285.412	184.173	266.958	251.974	235.617	212.016		17.9195	210.37	266.238	220.972	225.862	241.41	158.923	221.273	235.68	273.412	172.173	254.958	239.974	223.617	200.016		17.9195	0.913083	0.921215	0.974934	0.92569	0.923709	0.923096	0.93678	0.961505	0.929292	0.920724	0.944852	0.93441	0.959161	0.961236	0.937835	0.000370773	0.0192555
17.9453	219.976	282.635	228.56	242.917	255.386	177.436	231.207	240.377	292.759	191.443	266.37	258.938	231.159	214.916		17.9453	207.976	270.635	216.56	230.917	243.386	165.436	219.207	228.377	280.759	179.443	254.37	246.938	219.159	202.916		17.9453	0.902692	0.936429	0.955468	0.946408	0.93127	0.960926	0.928033	0.931711	0.954264	0.959601	0.942673	0.961526	0.94004	0.975173	0.94473	0.000337935	0.018383
17.9837	226.041	280.472	232.912	241.49	259.789	173.749	233.931	242.327	295.358	185.832	269.891	255.636	239.944	211.732		17.9837	214.041	268.472	220.912	229.49	247.789	161.749	221.931	230.327	283.358	173.832	257.891	243.636	227.944	199.732		17.9837	0.929016	0.928945	0.974669	0.940559	0.948117	0.939511	0.939565	0.939667	0.963098	0.929596	0.955721	0.948669	0.977721	0.959871	0.948195	0.00025794	0.0160605
18.0058	220.605	279.272	230.697	244.072	259.55	171.551	230.172	237.443	289.256	187.99	263.459	255.528	225.98	213.242		18.0058	208.605	267.272	218.697	232.072	247.55	159.551	218.172	225.443	277.256	175.99	251.459	243.528	213.98	201.242		18.0058	0.905422	0.924793	0.964896	0.951142	0.947203	0.926744	0.923651	0.919741	0.942358	0.941136	0.931885	0.948248	0.917825	0.967128	0.936584	0.000329319	0.0181472
18.0442	230.166	277.816	232.832	242.163	251.551	174.747	241.262	244.705	289.001	191.366	274.514	255.076	234.622	212.177		18.0442	218.166	265.816	220.832	230.163	239.551	162.747	229.262	232.705	277.001	179.366	262.514	243.076	222.622	200.177		18.0442	0.94692	0.919755	0.974316	0.943318	0.916596	0.945307	0.970602	0.949368	0.941491	0.95919	0.972854	0.946488	0.954893	0.96201	0.950222	0.000306294	0.0175013
18.07	228.84	273.765	226.554	239.387	258.99	170.966	229.567	242.116	281.979	185.926	267.967	261.896	231.009	209.215		18.07	216.84	261.765	214.554	227.387	246.99	158.966	217.567	230.116	269.979	173.926	255.967	249.896	219.009	197.215		18.07	0.941165	0.905738	0.946617	0.93194	0.94506	0.923346	0.92109	0.938806	0.917624	0.930098	0.948591	0.973044	0.939396	0.947775	0.936449	0.000276518	0.0166288
18.1084	223.514	275.868	230.811	244.441	256.079	172.828	237.441	241.035	289.375	190.455	271.743	264.234	231.5	212.718		18.1084	211.514	263.868	218.811	232.441	244.079	160.828	225.441	229.035	277.375	178.455	259.743	252.234	219.5	200.718		18.1084	0.918048	0.913014	0.965399	0.952654	0.933921	0.934161	0.954425	0.934396	0.942762	0.954318	0.962584	0.982148	0.941502	0.96461	0.94671	0.000369425	0.0192204
18.1305	227.177	277.855	232.085	243.966	256.706	170.722	235.497	242.123	292.616	192.16	266.133	260.861	231.233	208.53		18.1305	215.177	265.855	220.085	231.966	244.706	158.722	223.497	230.123	280.616	180.16	254.133	248.861	219.233	196.53		18.1305	0.933947	0.91989	0.97102	0.950707	0.936321	0.921928	0.946195	0.938834	0.953778	0.963436	0.941794	0.969014	0.940357	0.944483	0.945122	0.000241145	0.0155288
18.1689	224.88	274.058	230.859	238.81	255.071	171.304	233.558	237.906	291.007	190.841	265.508	256.979	233.907	214.676		18.1689	212.88	262.058	218.859	226.81	243.071	159.304	221.558	225.906	279.007	178.841	253.508	244.979	221.907	202.676		18.1689	0.923977	0.906751	0.965611	0.929576	0.930065	0.925309	0.937986	0.92163	0.948309	0.956382	0.939478	0.953898	0.951827	0.974019	0.940344	0.000354554	0.0188296
18.1947	220.76	276.624	234.57	245.325	254.661	174.037	233.789	236.695	292.302	182.096	269.381	260.782	235.235	215.049		18.1947	208.76	264.624	222.57	233.325	242.661	162.037	221.789	224.695	280.302	170.096	257.381	248.782	223.235	203.049		18.1947	0.906095	0.91563	0.981984	0.956277	0.928496	0.941183	0.938964	0.91669	0.952711	0.909617	0.953831	0.968706	0.957523	0.975812	0.943108	0.000615659	0.0248125
18.2332	229.188	287.84	232.205	239.042	262.738	167.242	231.541	236.641	292.126	179.96	277.375	259.254	233.411	211.446		18.2332	217.188	275.84	220.205	227.042	250.738	155.242	219.541	224.641	280.126	167.96	265.375	247.254	221.411	199.446		18.2332	0.942675	0.954439	0.97155	0.930526	0.959401	0.901715	0.929447	0.91647	0.952112	0.898194	0.983456	0.962757	0.949699	0.958497	0.943638	0.000643043	0.0253583
18.2553	225.235	274.456	229.327	243.959	257.186	171.311	229.446	237.441	293.672	192.123	271.614	253.178	235.798	208.574		18.2553	213.235	262.456	217.327	231.959	245.186	159.311	217.446	225.441	281.672	180.123	259.614	241.178	223.798	196.574		18.2553	0.925518	0.908129	0.958852	0.950679	0.938157	0.92535	0.920578	0.919733	0.957367	0.963238	0.962106	0.939098	0.959938	0.944694	0.94096	0.000341439	0.0184781
18.2937	232.492	280.057	230.456	241.223	260.874	173.312	236.53	234.621	293.829	188.369	269.099	259.008	235.03	213.386		18.2937	220.492	268.057	218.456	229.223	248.874	161.312	224.53	222.621	281.829	176.369	257.099	247.008	223.03	201.386		18.2937	0.957016	0.927509	0.963833	0.939465	0.952269	0.936972	0.950568	0.908229	0.957901	0.943163	0.952786	0.961799	0.956643	0.96782	0.948284	0.000258004	0.0160625
18.3195	234.107	274.645	224.289	244.679	259.741	174.914	232.018	234.195	289.879	190.217	272.519	254.107	231.491	211.865		18.3195	222.107	262.645	212.289	232.679	247.741	162.914	220.018	222.195	277.879	178.217	260.519	242.107	219.491	199.865		18.3195	0.964026	0.908783	0.936624	0.95363	0.947933	0.946277	0.931466	0.906491	0.944475	0.953045	0.96546	0.942715	0.941464	0.96051	0.943064	0.000321856	0.0179403
18.3579	222.621	279.567	232.255	247.025	259.107	172.642	231.948	238.369	293.328	179.686	273.501	259.054	233.757	212.979		18.3579	210.621	267.567	220.255	235.025	247.107	160.642	219.948	226.369	281.328	167.686	261.501	247.054	221.757	200.979		18.3579	0.914172	0.925813	0.97177	0.963245	0.945508	0.933081	0.93117	0.923519	0.956198	0.896729	0.969099	0.961978	0.951183	0.965864	0.943523	0.00053312	0.0230894
18.38	218.593	277.314	230.057	243.929	261.827	173.749	232.262	241.861	291.287	180.587	268.832	255.445	237.588	212.212		18.38	206.593	265.314	218.057	231.929	249.827	161.749	220.262	229.861	279.287	168.587	256.832	243.445	225.588	200.212		18.38	0.896689	0.918018	0.962073	0.950556	0.955915	0.939511	0.932499	0.937766	0.949261	0.901547	0.951797	0.947925	0.967615	0.962178	0.940953	0.00048312	0.02198
18.4184	222.602	273.818	235.57	241.352	258.76	178.72	232.959	238.351	290.023	188.445	270.297	261.181	231.118	213.349		18.4184	210.602	261.818	223.57	229.352	246.76	166.72	220.959	226.351	278.023	176.445	258.297	249.181	219.118	201.349		18.4184	0.91409	0.905921	0.986396	0.939994	0.94418	0.968384	0.93545	0.923446	0.944965	0.943569	0.957226	0.97026	0.939864	0.967642	0.945813	0.000511074	0.0226069
18.4461	230.438	280.064	225.863	241.839	260.693	177.159	231.06	241.281	292.569	187.267	266.524	254.997	230.955	208.476		18.4461	218.438	268.064	213.863	229.839	248.693	165.159	219.06	229.281	280.569	175.267	254.524	242.997	218.955	196.476		18.4461	0.948101	0.927533	0.943569	0.94199	0.951576	0.959317	0.927411	0.935399	0.953618	0.937269	0.943243	0.946181	0.939165	0.944223	0.942757	8.2949e-05	0.00910763
18.4845	231.725	273.781	226.144	240.796	251.374	175.838	235.207	239.214	288.495	184.754	266.15	259.998	236.291	213.293		18.4845	219.725	261.781	214.144	228.796	239.374	163.838	223.207	227.214	276.495	172.754	254.15	247.998	224.291	201.293		18.4845	0.953687	0.905793	0.944808	0.937715	0.915919	0.951644	0.944967	0.926967	0.939771	0.923831	0.941857	0.965654	0.962052	0.967373	0.941574	0.000339983	0.0184386
18.5066	230.459	279.315	232.211	244.169	257.608	170.784	232.75	240.317	288.76	185.309	269.714	253.282	234.064	211.353		18.5066	218.459	267.315	220.211	232.169	245.608	158.784	220.75	228.317	276.76	173.309	257.714	241.282	222.064	199.353		18.5066	0.948192	0.924941	0.971576	0.951539	0.939772	0.922289	0.934565	0.931467	0.940672	0.926799	0.955065	0.939503	0.9525	0.95805	0.942638	0.000202057	0.0142147
18.545	232.983	267.971	233.283	241.987	251.405	175.888	232.096	236.073	294.965	188.955	271.719	257.656	233.812	213.148		18.545	220.983	255.971	221.283	229.987	239.405	163.888	220.096	224.073	282.965	176.955	259.719	245.656	221.812	201.148		18.545	0.959147	0.88569	0.976306	0.942596	0.916037	0.951935	0.931797	0.914152	0.961762	0.946296	0.962496	0.956534	0.951419	0.966676	0.944489	0.000611207	0.0247226
18.5708	228.415	276.021	228.312	241.147	253.299	175.763	231.49	241.504	289.156	188.909	266.788	252.677	240.403	207.555		18.5708	216.415	264.021	216.312	229.147	241.299	163.763	219.49	229.504	277.156	176.909	254.788	240.677	228.403	195.555		18.5708	0.93932	0.913544	0.954374	0.939154	0.923284	0.951209	0.929231	0.936309	0.942018	0.94605	0.944222	0.937147	0.97969	0.939797	0.941096	0.000235962	0.015361
18.6092	231.439	278.041	234.208	242.278	254.421	176.014	234.132	240.219	288.904	181.047	271.436	255.394	229.737	211.046		18.6092	219.439	266.041	222.208	230.278	242.421	164.014	222.132	228.219	276.904	169.047	259.436	243.394	217.737	199.046		18.6092	0.952446	0.920533	0.980387	0.943789	0.927577	0.952667	0.940416	0.931067	0.941161	0.904007	0.961447	0.947726	0.93394	0.956574	0.94241	0.000355438	0.0188531
18.6313	231.884	278.724	232.544	242.84	249.383	177.198	238.959	239.871	291.67	186.079	274.243	261.562	235.828	210.867		18.6313	219.884	266.724	220.544	230.84	237.383	165.198	226.959	227.871	279.67	174.079	262.243	249.562	223.828	198.867		18.6313	0.954377	0.922896	0.973045	0.946092	0.9083	0.959544	0.960852	0.929647	0.950563	0.930916	0.971849	0.971743	0.960066	0.955714	0.949686	0.000393025	0.0198249
18.6697	226.354	279.511	233.197	237.359	257.334	170.655	234.603	245.196	284.672	186.203	265.864	255.792	235.223	207.774		18.6697	214.354	267.511	221.197	225.359	245.334	158.655	222.603	233.196	272.672	174.203	253.864	243.792	223.223	195.774		18.6697	0.930375	0.92562	0.975926	0.923629	0.938723	0.921539	0.94241	0.951371	0.926777	0.93158	0.940797	0.949276	0.957471	0.94085	0.939739	0.000228704	0.015123
18.6955	226.459	272.753	232.663	240.701	257.361	171.097	232.16	238.588	289.356	184.844	267.715	255.14	234.018	212.313		18.6955	214.459	260.753	220.663	228.701	245.361	159.097	220.16	226.588	277.356	172.844	255.715	243.14	222.018	200.313		18.6955	0.93083	0.902236	0.97357	0.937326	0.938827	0.924107	0.932068	0.924413	0.942698	0.924312	0.947657	0.946737	0.952303	0.962663	0.938553	0.000322867	0.0179685
18.734	231.832	279.462	230.394	239.151	256.926	172.208	230.555	238.534	286.891	189.539	269.053	256.227	231.221	214.818		18.734	219.832	267.462	218.394	227.151	244.926	160.208	218.555	226.534	274.891	177.539	257.053	244.227	219.221	202.818		18.734	0.954151	0.92545	0.963559	0.930973	0.937162	0.93056	0.925273	0.924192	0.934319	0.949419	0.952616	0.95097	0.940305	0.974702	0.942404	0.000241257	0.0155325
18.7561	224.033	272.272	235.318	250.545	259.489	174.735	231.181	238.21	287.906	187.478	269.28	255.825	231.032	212.888		18.7561	212.033	260.272	223.318	238.545	247.489	162.735	219.181	226.21	275.906	175.478	257.28	243.825	219.032	200.888		18.7561	0.920301	0.900572	0.985284	0.977671	0.946969	0.945238	0.927923	0.922871	0.937769	0.938398	0.953457	0.949405	0.939495	0.965427	0.943627	0.000512875	0.0226468
18.7945	225.369	280.834	233.632	239.401	262.264	174.107	232.968	244.084	286.535	185.67	269.73	255.369	231.12	210.533		18.7945	213.369	268.834	221.632	227.401	250.264	162.107	220.968	232.084	274.535	173.67	257.73	243.369	219.12	198.533		18.7945	0.9261	0.930197	0.977846	0.931998	0.957587	0.94159	0.935488	0.946835	0.933109	0.928729	0.955124	0.947629	0.939872	0.954109	0.943301	0.00020558	0.0143381
18.8203	231.704	279.991	230.797	244.521	257.373	174.782	232.233	233.277	291.465	188.807	267.556	253.946	229.139	212.175		18.8203	219.704	267.991	218.797	232.521	245.373	162.782	220.233	221.277	279.465	176.807	255.556	241.946	217.139	200.175		18.8203	0.953596	0.92728	0.965338	0.952982	0.938873	0.945511	0.932377	0.902745	0.949866	0.945505	0.947068	0.942088	0.931375	0.962	0.942615	0.000252266	0.0158829
18.8587	226.123	282.613	229.34	242.946	258.827	171.253	230.984	242.804	288.655	188.924	276.24	254.202	235.884	214.956		18.8587	214.123	270.613	217.34	230.946	246.827	159.253	218.984	230.804	276.655	176.924	264.24	242.202	223.884	202.956		18.8587	0.929372	0.936353	0.958909	0.946527	0.944436	0.925013	0.927089	0.941613	0.940315	0.946131	0.97925	0.943085	0.960307	0.975365	0.946697	0.000274064	0.0165549
18.8808	232.225	277.173	228.076	243.886	256.566	173.424	234.781	243.691	286.165	187.478	272.239	261.074	230.962	212.009		18.8808	220.225	265.173	216.076	231.886	244.566	161.424	222.781	231.691	274.165	175.478	260.239	249.074	218.962	200.009		18.8808	0.955857	0.91753	0.953332	0.950379	0.935785	0.937623	0.943164	0.945231	0.931852	0.938398	0.964423	0.969843	0.939195	0.961202	0.945987	0.000200546	0.0141614
18.9192	227.824	278.915	230.056	242.966	256.571	171.888	234.471	242.345	292.116	189.791	272.018	255.86	236.566	214.99		18.9192	215.824	266.915	218.056	230.966	244.571	159.888	222.471	230.345	280.116	177.791	260.018	243.86	224.566	202.99		18.9192	0.936755	0.923557	0.962068	0.946609	0.935804	0.928701	0.941851	0.93974	0.952078	0.950767	0.963604	0.949541	0.963232	0.975528	0.947845	0.000216199	0.0147037
18.945	226.76	275.235	232.834	243.36	255.474	172.891	231.213	236.376	288.922	186.601	268.393	249.672	231.325	208.458		18.945	214.76	263.235	220.834	231.36	243.474	160.891	219.213	224.376	276.922	174.601	256.393	237.672	219.325	196.458		18.945	0.932137	0.910824	0.974325	0.948224	0.931607	0.934527	0.928058	0.915388	0.941222	0.933708	0.95017	0.925446	0.940752	0.944137	0.936466	0.000246675	0.0157059
18.9834	225.705	277.63	235.077	242.632	252.657	169.257	229.353	242.169	285.539	185.613	273.274	261.624	234.691	213.309		18.9834	213.705	265.63	223.077	230.632	240.657	157.257	217.353	230.169	273.539	173.613	261.274	249.624	222.691	201.309		18.9834	0.927558	0.919111	0.984221	0.94524	0.920828	0.913419	0.920184	0.939022	0.929724	0.928424	0.968258	0.971985	0.955189	0.96745	0.942187	0.000540021	0.0232384
19.0056	222.736	275.323	230.234	247.285	254.402	168.67	233.242	241.492	291.403	184.898	270.281	259.256	234.461	221.42		19.0056	210.736	263.323	218.234	235.285	242.402	156.67	221.242	229.492	279.403	172.898	258.281	247.256	222.461	209.42		19.0056	0.914671	0.911129	0.962854	0.96431	0.927505	0.91001	0.936648	0.93626	0.949655	0.924601	0.957166	0.962764	0.954203	1.00643	0.944158	0.000706541	0.0265808
19.044	225.478	278.778	236.139	241.858	258.062	175.799	229.106	242.757	283.76	185.803	270.985	250.593	231.959	211.395		19.044	213.478	266.778	224.139	229.858	246.062	163.799	217.106	230.757	271.76	173.803	258.985	238.593	219.959	199.395		19.044	0.926573	0.923083	0.988907	0.942068	0.941509	0.951418	0.919138	0.941421	0.923677	0.92944	0.959775	0.929032	0.943471	0.958252	0.941269	0.000357261	0.0189013
19.0698	227.314	276.7	233.596	247.665	259.322	177.439	236.497	240.898	284.869	190.209	268.739	254.445	231.18	217.605		19.0698	215.314	264.7	221.596	235.665	247.322	165.439	224.497	228.898	272.869	178.209	256.739	242.445	219.18	205.605		19.0698	0.934542	0.915893	0.977687	0.965868	0.94633	0.960944	0.950429	0.933837	0.927447	0.953002	0.951452	0.944031	0.94013	0.988096	0.949263	0.000377826	0.0194377
19.1082	228.383	281.449	232.137	242.112	256.711	168.677	231.061	240.214	286.414	190.058	270.939	254.471	238.009	216.153		19.1082	216.383	269.449	220.137	230.112	244.711	156.677	219.061	228.214	274.414	178.058	258.939	242.471	226.009	204.153		19.1082	0.939181	0.932325	0.97125	0.943109	0.93634	0.91005	0.927415	0.931046	0.932698	0.952195	0.959605	0.944133	0.969421	0.981118	0.944992	0.000385046	0.0196226
19.1303	231.139	280.514	225.972	240.571	249.553	173.868	233.47	239.39	296.728	190.756	272.186	255.903	230.957	214.023		19.1303	219.139	268.514	213.972	228.571	237.553	161.868	221.47	227.39	284.728	178.756	260.186	243.903	218.957	202.023		19.1303	0.951143	0.92909	0.944049	0.936793	0.908951	0.940202	0.937614	0.927685	0.967754	0.955927	0.964226	0.949708	0.939173	0.970881	0.944514	0.000289655	0.0170193
19.1687	225.892	280.289	234.055	246.164	252.801	176.349	236.519	241.593	285.455	186.821	271.073	261.492	236.5	216.496		19.1687	213.892	268.289	222.055	234.164	240.801	164.349	224.519	229.593	273.455	174.821	259.073	249.492	224.5	204.496		19.1687	0.92837	0.928311	0.979712	0.959716	0.921379	0.954613	0.950522	0.936672	0.929439	0.934884	0.960102	0.971471	0.962949	0.982766	0.950065	0.000414563	0.0203608
19.1945	226.924	278.512	236.341	240.286	258.842	177.236	239.312	244.066	290.502	190.789	266.404	253.713	235.841	215.538		19.1945	214.924	266.512	224.341	228.286	246.842	165.236	227.312	232.066	278.502	178.789	254.404	241.713	223.841	203.538		19.1945	0.932849	0.922163	0.989798	0.935625	0.944494	0.959765	0.962346	0.946761	0.946593	0.956104	0.942799	0.941181	0.960122	0.978162	0.95134	0.000322852	0.0179681
19.2329	227.078	273.016	238.551	245.092	253.086	174.493	236.685	240.202	291.864	187.317	267.225	252.437	231.72	207.824		19.2329	215.078	261.016	226.551	233.092	241.086	162.493	224.685	228.202	279.864	175.317	255.225	240.437	219.72	195.824		19.2329	0.933517	0.903146	0.999548	0.955322	0.922469	0.943832	0.951225	0.930997	0.951222	0.937537	0.945841	0.936213	0.942446	0.94109	0.942458	0.000447165	0.0211463
19.255	225.848	277.201	232.358	238.995	261.066	175.413	232.73	241.767	285.98	187.382	265.397	261.412	236.406	209.936		19.255	213.848	265.201	220.358	226.995	249.066	163.413	220.73	229.767	273.98	175.382	253.397	249.412	224.406	197.936		19.255	0.928179	0.917627	0.972225	0.930334	0.953003	0.949176	0.934481	0.937382	0.931223	0.937884	0.939067	0.971159	0.962546	0.95124	0.943966	0.000271576	0.0164796
19.2935	224.72	280.426	228.378	243.949	262.13	173.21	235.239	244.567	292.246	185.687	263.711	252.408	235.307	208.784		19.2935	212.72	268.426	216.378	231.949	250.13	161.21	223.239	232.567	280.246	173.687	251.711	240.408	223.307	196.784		19.2935	0.923283	0.928786	0.954665	0.950638	0.957074	0.93638	0.945103	0.948805	0.95252	0.92882	0.932819	0.9361	0.957832	0.945704	0.942752	0.000133436	0.0115515
19.3211	230.646	279.83	236.261	242.975	261.57	170.074	232.565	239.643	287.68	191.414	266.412	254.321	235.073	215.533		19.3211	218.646	267.83	224.261	230.975	249.57	158.074	220.565	227.643	275.68	179.414	254.412	242.321	223.073	203.533		19.3211	0.949004	0.926723	0.989445	0.946646	0.954932	0.918165	0.933782	0.928717	0.937001	0.959446	0.942828	0.943548	0.956828	0.978138	0.947514	0.000382068	0.0195466
19.3595	224.73	278.028	226.568	243.911	263.253	171.362	237.881	245.289	289.12	189.398	269.291	252.98	239.65	215.213		19.3595	212.73	266.028	214.568	231.911	251.253	159.362	225.881	233.289	277.12	177.398	257.291	240.98	227.65	203.213		19.3595	0.923326	0.920488	0.946679	0.950482	0.961371	0.925646	0.956288	0.951751	0.941895	0.948665	0.953498	0.938327	0.97646	0.9766	0.947963	0.000301869	0.0173744
19.3816	226.285	280.99	230.375	247.479	262.571	176.713	231.746	238.418	286.636	186.403	267.78	258.763	236.072	216.6		19.3816	214.285	268.99	218.375	235.479	250.571	164.713	219.746	226.418	274.636	174.403	255.78	246.763	224.072	204.6		19.3816	0.930075	0.930737	0.963476	0.965105	0.958762	0.956727	0.930315	0.923719	0.933453	0.932649	0.947898	0.960845	0.961113	0.983266	0.948438	0.00032853	0.0181254
19.42	227.476	279.708	230.695	247.847	254.143	176.186	230.972	243.429	285.267	185.597	267.554	258.264	234.487	215.988		19.42	215.476	267.708	218.695	235.847	242.143	164.186	218.972	231.429	273.267	173.597	255.554	246.264	222.487	203.988		19.42	0.935245	0.926301	0.964887	0.966613	0.926514	0.953666	0.927038	0.944163	0.9288	0.928339	0.94706	0.958902	0.954314	0.980325	0.945869	0.000316093	0.017779
19.4458	229.345	274.948	234.285	243.628	254.081	170.224	233.899	247.79	286.466	186.672	265.343	260.451	236.488	212.088		19.4458	217.345	262.948	222.285	231.628	242.081	158.224	221.899	235.79	274.466	174.672	253.343	248.451	224.488	200.088		19.4458	0.943357	0.909831	0.980727	0.949322	0.926276	0.919036	0.93943	0.961954	0.932875	0.934088	0.938867	0.967417	0.962897	0.961582	0.944833	0.000406073	0.0201513
19.4843	225.87	280.432	231.682	242.891	260.553	176.453	234.882	242.536	291.809	191.144	263.459	259.662	231.967	213.995		19.4843	213.87	268.432	219.682	230.891	248.553	164.453	222.882	230.536	279.809	179.144	251.459	247.662	219.967	201.995		19.4843	0.928274	0.928806	0.969242	0.946301	0.95104	0.955217	0.943591	0.940519	0.951035	0.958002	0.931885	0.964345	0.943505	0.970747	0.948751	0.0001934	0.0139068
19.5064	225.446	275.119	230.315	243.556	257.805	172.482	233.545	239.25	293.118	185.189	266.074	259.042	232.339	214.328		19.5064	213.446	263.119	218.315	231.556	245.805	160.482	221.545	227.25	281.118	173.189	254.074	247.042	220.339	202.328		19.5064	0.926434	0.910423	0.963211	0.949027	0.940526	0.932151	0.937931	0.927113	0.955484	0.926157	0.941576	0.961931	0.945101	0.972347	0.942101	0.000295132	0.0171794
19.5448	225.588	281.538	226.329	245.521	257.02	175.366	227.078	240.263	288.336	189.587	267.128	259.721	233.352	216.048		19.5448	213.588	269.538	214.329	233.521	245.02	163.366	215.078	228.263	276.336	177.587	255.128	247.721	221.352	204.048		19.5448	0.92705	0.932633	0.945625	0.95708	0.937522	0.948903	0.910552	0.931246	0.939231	0.949676	0.945482	0.964575	0.949446	0.980613	0.94426	0.000291335	0.0170685
19.5706	222.535	272.623	231.239	239.333	252.742	173.228	233.233	240.124	287.699	191.873	267.555	261.31	232.761	215.767		19.5706	210.535	260.623	219.239	227.333	240.742	161.228	221.233	228.124	275.699	179.873	255.555	249.31	220.761	203.767		19.5706	0.913799	0.901786	0.967288	0.931719	0.921153	0.936484	0.93661	0.930679	0.937066	0.961901	0.947064	0.970762	0.946911	0.979263	0.941606	0.000497198	0.0222979
19.609	226.241	275.15	229.536	247.371	258.498	174.251	237.806	240.688	288.136	188.562	262.523	257.496	232.377	209.167		19.609	214.241	263.15	217.536	235.371	246.498	162.251	225.806	228.688	276.136	176.562	250.523	245.496	220.377	197.167		19.609	0.929884	0.91053	0.959774	0.964663	0.943177	0.942426	0.95597	0.93298	0.938551	0.944195	0.928416	0.955911	0.945264	0.947544	0.942806	0.000205524	0.0143361
19.6311	223.029	281.609	227.715	242.459	253.873	176.002	233.573	242.715	293.765	194.213	271.366	264.001	235.08	213.333		19.6311	211.029	269.609	215.715	230.459	241.873	164.002	221.573	230.715	281.765	182.213	259.366	252.001	223.08	201.333		19.6311	0.915943	0.932879	0.95174	0.944531	0.925481	0.952597	0.93805	0.94125	0.957683	0.974414	0.961187	0.98124	0.956858	0.967565	0.950101	0.000340378	0.0184493
19.6695	226.108	275.722	235.895	247.528	255.929	168.644	235.258	242.104	293.637	192.387	270.695	261.48	231.552	216.112		19.6695	214.108	263.722	223.895	235.528	243.929	156.644	223.258	230.104	281.637	180.387	258.695	249.48	219.552	204.112		19.6695	0.929307	0.912509	0.98783	0.965306	0.933348	0.909859	0.945183	0.938757	0.957248	0.96465	0.958701	0.971424	0.941725	0.980921	0.949769	0.000566388	0.0237989
19.6953	225.627	283.837	233.387	242.86	253.588	171.758	233.236	242.721	294.819	191.606	267.462	252.782	227.281	214.607		19.6953	213.627	271.837	221.387	230.86	241.588	159.758	221.236	230.721	282.819	179.606	255.462	240.782	215.281	202.607		19.6953	0.927219	0.940588	0.976765	0.946174	0.92439	0.927946	0.936623	0.941274	0.961266	0.960473	0.946719	0.937556	0.923406	0.973688	0.944578	0.000307293	0.0175298
19.7337	222.315	287.037	232.074	247.862	256.606	174.278	232.196	249.219	297.028	186.199	270.129	253.626	231.309	212.81		19.7337	210.315	275.037	220.074	235.862	244.606	162.278	220.196	237.219	285.028	174.199	258.129	241.626	219.309	200.81		19.7337	0.912844	0.95166	0.970972	0.966675	0.935938	0.942583	0.93222	0.967784	0.968774	0.931558	0.956603	0.940842	0.940683	0.965052	0.948871	0.000315528	0.0177631
19.7559	223.119	276.485	235.401	245.316	252.763	174.62	232.946	244.051	294.253	188.977	274.163	262.179	234.363	214.357		19.7559	211.119	264.485	223.401	233.316	240.763	162.62	220.946	232.051	282.253	176.977	262.163	250.179	222.363	202.357		19.7559	0.916334	0.915149	0.98565	0.95624	0.921233	0.94457	0.935395	0.9467	0.959342	0.946414	0.971553	0.974146	0.953782	0.972486	0.949928	0.000492818	0.0221995
19.7943	224.606	272.215	237.889	245.965	254.661	177.725	231.894	241.728	289.002	194.578	269.41	262.257	235.438	213.771		19.7943	212.606	260.215	225.889	233.965	242.661	165.725	219.894	229.728	277.002	182.578	257.41	250.257	223.438	201.771		19.7943	0.922788	0.900374	0.996628	0.9589	0.928496	0.962605	0.930941	0.937223	0.941494	0.976366	0.953939	0.97445	0.958393	0.96967	0.950876	0.000648598	0.0254676
19.8201	227.346	273.955	233.459	241.112	258.854	174.921	233.845	238.789	293.237	186.098	271.271	265.104	235.67	210.737		19.8201	215.346	261.955	221.459	229.112	246.854	162.921	221.845	226.789	281.237	174.098	259.271	253.104	223.67	198.737		19.8201	0.93468	0.906395	0.977082	0.93901	0.944539	0.946318	0.939201	0.925233	0.955889	0.931018	0.960835	0.985535	0.959389	0.955089	0.947158	0.000426142	0.0206432
19.8585	221.294	279.046	231.694	242.03	253.606	169.607	233.245	238.582	289.879	182.548	266.555	260.764	237.002	211.742		19.8585	209.294	267.046	219.694	230.03	241.606	157.607	221.245	226.582	277.879	170.548	254.555	248.764	225.002	199.742		19.8585	0.908413	0.924011	0.969295	0.942773	0.924459	0.915452	0.936661	0.924388	0.944475	0.912034	0.943358	0.968636	0.965102	0.959919	0.938498	0.000449775	0.0212079
19.8806	224.787	275.426	231.907	239.57	256.553	174.412	237.328	239.529	288.774	189.462	265.477	260.084	230.3	217.7		19.8806	212.787	263.426	219.907	227.57	244.553	162.412	225.328	227.529	276.774	177.462	253.477	248.084	218.3	205.7		19.8806	0.923573	0.911485	0.970235	0.93269	0.935735	0.943362	0.953947	0.928252	0.940719	0.949008	0.939363	0.965988	0.936355	0.988552	0.944233	0.000406901	0.0201718
19.919	230.414	278.848	238.265	243.63	258.089	173.442	235.213	241.863	294.121	187.33	265.451	253.98	224.346	216.135		19.919	218.414	266.848	226.265	231.63	246.089	161.442	223.213	229.863	282.121	175.33	253.451	241.98	212.346	204.135		19.919	0.947997	0.923325	0.998287	0.94933	0.941612	0.937727	0.944993	0.937774	0.958893	0.937606	0.939267	0.942221	0.910817	0.981031	0.946491	0.000475187	0.0217988
19.9448	224.965	283.505	226.685	243.074	253.394	175.177	238.856	238.903	291.053	192.147	271.61	258.489	234.457	219.113		19.9448	212.965	271.505	214.685	231.074	241.394	163.177	226.856	226.903	279.053	180.147	259.61	246.489	222.457	207.113		19.9448	0.924346	0.939439	0.947195	0.947051	0.923648	0.947805	0.960416	0.925698	0.948465	0.963366	0.962092	0.959778	0.954186	0.995343	0.949916	0.000360058	0.0189752
19.9832	221.307	277.221	229.036	242.597	256.823	172.299	236.189	244.593	291.497	188.981	269.088	255.492	236.523	212.258		19.9832	209.307	265.221	217.036	230.597	244.823	160.299	224.189	232.593	279.497	176.981	257.088	243.492	224.523	200.258		19.9832	0.908469	0.917696	0.957568	0.945096	0.936768	0.931088	0.949125	0.948911	0.949975	0.946435	0.952745	0.948108	0.963047	0.962399	0.944102	0.000249632	0.0157997
20.0053	227.979	276.745	233.415	239.902	253.822	177.348	236.687	238.507	287.375	191.708	270.711	259.336	230.863	208.688		20.0053	215.979	264.745	221.415	227.902	241.822	165.348	224.687	226.507	275.375	179.708	258.711	247.336	218.863	196.688		20.0053	0.937428	0.916049	0.976888	0.934051	0.925285	0.960415	0.951233	0.924082	0.935964	0.961018	0.95876	0.963076	0.93877	0.945242	0.944876	0.000309839	0.0176022
20.0437	221.364	280.092	232.526	238.651	261.532	169.359	241.246	246.124	290.491	190.429	266.064	254.121	234.434	218.246		20.0437	209.364	268.092	220.526	226.651	249.532	157.359	229.246	234.124	278.491	178.429	254.064	242.121	222.434	206.246		20.0437	0.908716	0.92763	0.972966	0.928924	0.954786	0.914012	0.970534	0.955157	0.946555	0.954179	0.941539	0.94277	0.954087	0.991176	0.947359	0.00051619	0.0227198
20.0696	226.607	280.256	231.779	238.757	254.815	172.951	234.087	246.036	287.606	183.303	262.727	256.351	233.183	214.794		20.0696	214.607	268.256	219.779	226.757	242.815	160.951	222.087	234.036	275.606	171.303	250.727	244.351	221.183	202.794		20.0696	0.931473	0.928197	0.96967	0.929358	0.929085	0.934876	0.940226	0.954798	0.93675	0.916071	0.929172	0.951453	0.948721	0.974586	0.941031	0.00028146	0.0167768
20.108	221.566	277.6	227.158	244.175	256.579	172.603	233.144	239.997	292.915	190.975	268.848	252.791	235.936	213.582		20.108	209.566	265.6	215.158	232.175	244.579	160.603	221.144	227.997	280.915	178.975	256.848	240.791	223.936	201.582		20.108	0.909593	0.919007	0.949282	0.951564	0.935835	0.932854	0.936233	0.930161	0.954794	0.957099	0.951856	0.937591	0.96053	0.968762	0.942511	0.000275582	0.0166007
20.1301	223.953	276.904	229.236	245.321	261.298	175.519	230.244	239.383	290.922	194.235	270.938	257.175	235.475	208.813		20.1301	211.953	264.904	217.236	233.321	249.298	163.519	218.244	227.383	278.922	182.235	258.938	245.175	223.475	196.813		20.1301	0.919954	0.916599	0.95845	0.956261	0.953891	0.949792	0.923956	0.927656	0.94802	0.974532	0.959601	0.954661	0.958552	0.945843	0.946269	0.000302842	0.0174024
20.1685	223.742	273.304	232.006	237.682	261.39	174.805	233.125	242.244	292.22	186.166	271.185	255.163	236.363	212.686		20.1685	211.742	261.304	220.006	225.682	249.39	162.805	221.125	230.244	280.22	174.166	259.185	243.163	224.363	200.686		20.1685	0.919038	0.904143	0.970672	0.924952	0.954243	0.945644	0.936153	0.939328	0.952432	0.931382	0.960517	0.946827	0.962361	0.964456	0.943725	0.000364812	0.0191001
20.1961	225.354	280.484	225.018	244.686	261.23	174.048	232.22	242.394	287.979	186.544	271.98	258.102	234.89	214.713		20.1961	213.354	268.484	213.018	232.686	249.23	162.048	220.22	230.394	275.979	174.544	259.98	246.102	222.89	202.713		20.1961	0.926034	0.928986	0.93984	0.953658	0.953631	0.941247	0.932322	0.93994	0.938017	0.933403	0.963463	0.958271	0.956043	0.974197	0.945647	0.000204727	0.0143083
20.2345	230.134	277.429	232.01	241.853	256.832	174.182	233.308	241.117	295.392	183	272.207	257.387	236.741	217.583		20.2345	218.134	265.429	220.01	229.853	244.832	162.182	221.308	229.117	283.392	171	260.207	245.387	224.741	205.583		20.2345	0.946781	0.918416	0.970689	0.942047	0.936803	0.942026	0.936928	0.93473	0.963213	0.914451	0.964304	0.955487	0.963982	0.98799	0.948418	0.00041675	0.0204145
20.2567	226.261	267.658	231.248	242.115	255.043	175.538	228.28	241.14	287.342	192.356	270.167	256.626	235.225	210.975		20.2567	214.261	255.658	219.248	230.115	243.043	163.538	216.28	229.14	275.342	180.356	258.167	244.626	223.225	198.975		20.2567	0.929971	0.884607	0.967327	0.943121	0.929957	0.949902	0.915641	0.934824	0.935852	0.964484	0.956744	0.952524	0.95748	0.956233	0.941333	0.000487891	0.0220883
20.2951	230.927	275.97	230.173	246.754	254.701	172.61	232.847	238.131	290.874	189.682	267.672	257.039	234.454	214.615		20.2951	218.927	263.97	218.173	234.754	242.701	160.61	220.847	226.131	278.874	177.682	255.672	245.039	222.454	202.615		20.2951	0.950223	0.913367	0.962584	0.962134	0.928649	0.932895	0.934976	0.922548	0.947857	0.950184	0.947498	0.954132	0.954173	0.973726	0.945353	0.000283185	0.0168281
20.3209	229.113	275.098	231.118	243.098	255.989	177.01	228.738	242.279	295.351	189.65	268.453	260.083	233.782	214.317		20.3209	217.113	263.098	219.118	231.098	243.989	165.01	216.738	230.279	283.351	177.65	256.453	248.083	221.782	202.317		20.3209	0.94235	0.91035	0.966754	0.94715	0.933577	0.958452	0.91758	0.939471	0.963074	0.950013	0.950392	0.965985	0.95129	0.972294	0.947767	0.000329073	0.0181404
20.3593	221.503	276.795	232.568	239.526	257.679	171.07	230.469	239.729	291.281	187.774	272.291	260.95	233.003	212.375		20.3593	209.503	264.795	220.568	227.526	245.679	159.07	218.469	227.729	279.281	175.774	260.291	248.95	221.003	200.375		20.3593	0.90932	0.916222	0.973151	0.93251	0.940044	0.92395	0.924909	0.929068	0.94924	0.939981	0.964615	0.96936	0.947949	0.962961	0.941663	0.000413207	0.0203275
20.3814	227.943	281.871	224.645	239.862	263.932	177.814	232.657	244.836	290.345	188.435	266.115	252.767	231.503	214.623		20.3814	215.943	269.871	212.645	227.862	251.932	165.814	220.657	232.836	278.345	176.435	254.115	240.767	219.503	202.623		20.3814	0.937272	0.933785	0.938195	0.933887	0.963969	0.963122	0.934172	0.949903	0.946059	0.943516	0.941728	0.937497	0.941515	0.973765	0.945599	0.000160746	0.0126785
20.4198	231.4	272.603	226.95	237.816	256.396	169.468	234.621	237.503	289.801	188.67	271.15	256.625	232.29	211.91		20.4198	219.4	260.603	214.95	225.816	244.396	157.468	222.621	225.503	277.801	176.67	259.15	244.625	220.29	199.91		20.4198	0.952276	0.901717	0.948364	0.925502	0.935134	0.914645	0.942486	0.919986	0.94421	0.944772	0.960387	0.95252	0.944891	0.960727	0.939116	0.000309629	0.0175963
20.4456	224.812	272.506	226.418	239.876	258.227	172.915	236.058	238.695	288.048	192.549	266.829	256.736	234.633	215.951		20.4456	212.812	260.506	214.418	227.876	246.227	160.915	224.058	226.695	276.048	180.549	254.829	244.736	222.633	203.951		20.4456	0.923682	0.901381	0.946017	0.933945	0.94214	0.934666	0.94857	0.924849	0.938252	0.965516	0.944374	0.952952	0.954941	0.980147	0.942245	0.000367076	0.0191592
20.484	225.688	282.626	235.419	242.836	261.344	169.271	232.108	234.841	291.453	189.871	274.104	255.343	238.81	215.382		20.484	213.688	270.626	223.419	230.836	249.344	157.271	220.108	222.841	279.453	177.871	262.104	243.343	226.81	203.382		20.484	0.927484	0.936398	0.98573	0.946076	0.954067	0.9135	0.931847	0.909126	0.949825	0.951195	0.971334	0.947528	0.972857	0.977412	0.94817	0.000540205	0.0232423
20.5061	221.424	280.314	229.82	242.821	255.649	175.326	235.679	241.776	292.392	187.788	268.194	259.665	238.194	215.482		20.5061	209.424	268.314	217.82	230.821	243.649	163.326	223.679	229.776	280.392	175.788	256.194	247.665	226.194	203.482		20.5061	0.908977	0.928398	0.961027	0.946015	0.932276	0.948671	0.946966	0.937419	0.953017	0.940056	0.949432	0.964357	0.970215	0.977893	0.94748	0.000321737	0.017937
20.5446	229.132	272.486	230.774	241.97	261.117	170.202	232.778	245.993	286.592	184.29	269.988	257.951	237.151	214.275		20.5446	217.132	260.486	218.774	229.97	249.117	158.202	220.778	233.993	274.592	172.29	257.988	245.951	225.151	202.275		20.5446	0.942432	0.901312	0.965236	0.942527	0.953198	0.918908	0.934684	0.954623	0.933303	0.921349	0.956081	0.957683	0.965741	0.972092	0.944226	0.00041642	0.0204064
20.5704	222.34	281.527	228.702	239.274	258.551	173.044	229.623	240.416	297.101	186.317	268.788	257.303	231.504	215.332		20.5704	210.34	269.527	216.702	227.274	246.551	161.044	217.623	228.416	285.101	174.317	256.788	245.303	219.504	203.332		20.5704	0.912953	0.932595	0.956094	0.931477	0.94338	0.935416	0.921327	0.93187	0.969022	0.932189	0.951634	0.95516	0.941519	0.977172	0.942272	0.000318885	0.0178574
20.6088	229.154	273.572	226.644	241.962	250.998	175.906	232.431	243.728	292.265	187.998	271.083	259.818	240.966	212.9		20.6088	217.154	261.572	214.644	229.962	238.998	163.906	220.431	231.728	280.265	175.998	259.083	247.818	228.966	200.9		20.6088	0.942528	0.90507	0.947014	0.942494	0.91448	0.952039	0.933215	0.945382	0.952585	0.941179	0.960139	0.964953	0.982105	0.965484	0.946333	0.00040014	0.0200035
20.6309	226.411	274.523	226.612	244.785	257.981	171.509	235.493	240.047	288.81	189.164	268.064	255.594	232.718	215.578		20.6309	214.411	262.523	214.612	232.785	245.981	159.509	223.493	228.047	276.81	177.164	256.064	243.594	220.718	203.578		20.6309	0.930622	0.90836	0.946873	0.954064	0.941199	0.9265	0.946178	0.930365	0.940842	0.947414	0.94895	0.948505	0.946727	0.978354	0.942497	0.00025276	0.0158984
20.6693	225.185	275.403	235.443	239.922	265.257	175.109	235.855	237.501	289.501	189.762	266.336	255.128	234.029	206.982		20.6693	213.185	263.403	223.443	227.922	253.257	163.109	223.855	225.501	277.501	177.762	254.336	243.128	222.029	194.982		20.6693	0.925301	0.911405	0.985836	0.934133	0.969039	0.94741	0.947711	0.919978	0.94319	0.950612	0.942547	0.946691	0.95235	0.937044	0.943803	0.00035849	0.0189338
20.6951	227.409	280.047	229.116	241.455	258.343	167.545	237.582	242.605	297.783	183.94	265.07	255.335	228.539	213.647		20.6951	215.409	268.047	217.116	229.455	246.343	155.545	225.582	230.605	285.783	171.94	253.07	243.335	216.539	201.647		20.6951	0.934954	0.927474	0.957921	0.940416	0.942584	0.903475	0.955022	0.940801	0.97134	0.919478	0.937855	0.947497	0.928802	0.969074	0.941192	0.000345055	0.0185756
20.7335	230.596	274.296	230.16	243.62	256.508	172.128	239.025	242.379	291.502	192.382	266.114	254.565	231.881	215.729		20.7335	218.596	262.296	218.16	231.62	244.508	160.128	227.025	230.379	279.502	180.382	254.114	242.565	219.881	203.729		20.7335	0.948787	0.907575	0.962527	0.949289	0.935563	0.930095	0.961131	0.939879	0.949992	0.964623	0.941724	0.944499	0.943136	0.97908	0.946993	0.000297576	0.0172504
20.7556	227.196	275.436	231.206	244.883	254.766	178.448	233.893	241.489	301.708	194.222	271.353	257.218	234.571	213.387		20.7556	215.196	263.436	219.206	232.883	242.766	166.448	221.893	229.489	289.708	182.222	259.353	245.218	222.571	201.387		20.7556	0.934029	0.91152	0.967142	0.954466	0.928898	0.966805	0.939404	0.936248	0.98468	0.974462	0.961139	0.954829	0.954675	0.967825	0.95258	0.000405662	0.0201411
20.794	223.635	273.719	233.219	242.172	251.527	176.819	232.3	236.019	293.962	190.542	267.883	254.762	233.968	217.134		20.794	211.635	261.719	221.219	230.172	239.527	164.819	220.3	224.019	281.962	178.542	255.883	242.762	221.968	205.134		20.794	0.918573	0.905579	0.976023	0.943355	0.916504	0.957343	0.93266	0.913932	0.958353	0.954783	0.94828	0.945266	0.952088	0.985832	0.943469	0.000559151	0.0236464
20.8198	222.579	274.55	231.076	241.866	255.254	176.367	237.277	240.681	288.659	185.874	272.826	251.57	231.366	213.676		20.8198	210.579	262.55	219.076	229.866	243.254	164.367	225.277	228.681	276.659	173.874	260.826	239.57	219.366	201.676		20.8198	0.91399	0.908454	0.966568	0.9421	0.930765	0.954717	0.953731	0.932952	0.940329	0.92982	0.966598	0.932837	0.940927	0.969214	0.941643	0.00035393	0.018813
20.8583	230.862	272.979	232.115	238.582	249.375	175.816	231.888	243.492	295.458	191.246	271.82	256.355	235.235	214.612		20.8583	218.862	260.979	220.115	226.582	237.375	163.816	219.888	231.492	283.458	179.246	259.82	244.355	223.235	202.612		20.8583	0.949941	0.903018	0.971153	0.928641	0.90827	0.951517	0.930916	0.94442	0.963437	0.958548	0.96287	0.951468	0.957523	0.973712	0.946817	0.000472952	0.0217475
20.8804	225.19	274.783	234.791	242.018	256.179	174.847	231.957	237.331	290.437	182.9	269.178	261.366	234.136	211.359		20.8804	213.19	262.783	222.791	230.018	244.179	162.847	219.957	225.331	278.437	170.9	257.178	249.366	222.136	199.359		20.8804	0.925323	0.90926	0.982959	0.942723	0.934304	0.945888	0.931208	0.919285	0.946372	0.913916	0.953079	0.97098	0.952809	0.958079	0.94187	0.000452349	0.0212685
20.9188	231.043	273.436	241.712	241.97	249.789	177.714	231.718	248.768	289.774	185.19	262.986	257.711	232.541	208.672		20.9188	219.043	261.436	229.712	229.97	237.789	165.714	219.718	236.768	277.774	173.19	250.986	245.711	220.541	196.672		20.9188	0.950727	0.904599	1.01349	0.942527	0.909854	0.962541	0.930196	0.965944	0.944118	0.926162	0.930132	0.956748	0.945967	0.945165	0.94487	0.000713758	0.0267162
20.9446	217.65	271.71	232.385	237.936	252.457	180.046	232.369	245.558	290.97	190.636	270.301	255.15	232.714	214.048		20.9446	205.65	259.71	220.385	225.936	240.457	168.046	220.369	233.558	278.97	178.636	258.301	243.15	220.714	202.048		20.9446	0.892596	0.898627	0.972344	0.925993	0.920063	0.976086	0.932952	0.952848	0.948183	0.955286	0.957241	0.946776	0.946709	0.971001	0.942622	0.000666866	0.0258237
20.983	222.532	272.318	231.273	245.251	254.848	174.373	230.031	240.232	294.908	189.645	266.336	250.218	237.05	218.582		20.983	210.532	260.318	219.273	233.251	242.848	162.373	218.031	228.232	282.908	177.645	254.336	238.218	225.05	206.582		20.983	0.913786	0.900731	0.967438	0.955974	0.929211	0.943135	0.923054	0.93112	0.961568	0.949986	0.942547	0.927572	0.965308	0.992791	0.943159	0.000595615	0.0244052
21.0051	224.381	274.597	226.514	244.412	250.016	169.66	237.119	242.007	301.786	186.455	265.637	253.365	233.884	213.758		21.0051	212.381	262.597	214.514	232.412	238.016	157.66	225.119	230.007	289.786	174.455	253.637	241.365	221.884	201.758		21.0051	0.921811	0.908616	0.946441	0.952535	0.910723	0.91576	0.953062	0.938361	0.984946	0.932927	0.939956	0.939826	0.951728	0.969608	0.94045	0.000477992	0.021863
21.0435	219.244	270.996	234.331	243.204	249.858	174.433	232.564	237.839	287.6	190.581	270.641	259.038	233.922	213.197		21.0435	207.244	258.996	222.331	231.204	237.858	162.433	220.564	225.839	275.6	178.581	258.641	247.038	221.922	201.197		21.0435	0.899515	0.896157	0.98093	0.947584	0.910118	0.943484	0.933778	0.921357	0.936729	0.954992	0.958501	0.961915	0.951891	0.966912	0.940276	0.000654459	0.0255824
21.0712	221.249	274.706	229.399	244.389	251.609	176.878	233.957	239.451	292.177	190.661	272.74	259.852	238.029	218.505		21.0712	209.249	262.706	217.399	232.389	239.609	164.878	221.957	227.451	280.177	178.661	260.74	247.852	226.029	206.505		21.0712	0.908217	0.908994	0.95917	0.952441	0.916818	0.957685	0.939675	0.927934	0.952286	0.955419	0.966279	0.965085	0.969507	0.992421	0.947995	0.000609381	0.0246856
21.1096	221.856	270.374	230.082	235.23	253.338	174.796	233.498	244.124	288.869	187.813	268.002	253.725	232.877	213.525		21.1096	209.856	258.374	218.082	223.23	241.338	162.796	221.498	232.124	276.869	175.813	256.002	241.725	220.877	201.525		21.1096	0.910852	0.894004	0.962183	0.914903	0.923434	0.945592	0.937732	0.946998	0.941042	0.940189	0.948721	0.941228	0.947409	0.968488	0.937341	0.000407164	0.0201783
21.1317	222.856	268.23	235.186	238.245	254.631	175.228	235.067	240.641	295.684	189.823	263.198	255.191	240.172	213.42		21.1317	210.856	256.23	223.186	226.245	242.631	163.228	223.067	228.641	283.684	177.823	251.198	243.191	228.172	201.42		21.1317	0.915192	0.886586	0.984702	0.92726	0.928381	0.948101	0.944375	0.932788	0.964206	0.950938	0.930917	0.946936	0.978699	0.967983	0.943362	0.000681497	0.0261055
21.1701	222.913	278.898	232.131	244.343	254.397	171.13	230.506	238.492	291.803	189.351	269.345	254.157	231.708	212.893		21.1701	210.913	266.898	220.131	232.343	242.397	159.13	218.506	226.492	279.803	177.351	257.345	242.157	219.708	200.893		21.1701	0.91544	0.923498	0.971223	0.952252	0.927486	0.924298	0.925065	0.924021	0.951015	0.948414	0.953698	0.94291	0.942394	0.965451	0.940512	0.000301543	0.017365
21.1959	224.913	270.754	224.29	244.92	256.916	180.602	234.616	242.415	293.221	187.759	262.542	258.303	231.714	209.915		21.1959	212.913	258.754	212.29	232.92	244.916	168.602	222.616	230.415	281.221	175.759	250.542	246.303	219.714	197.915		21.1959	0.92412	0.895319	0.936628	0.954617	0.937124	0.979316	0.942465	0.940026	0.955834	0.939901	0.928486	0.959054	0.94242	0.951139	0.941889	0.000373842	0.019335
21.2343	217.789	280.819	231.115	241.249	258.633	179.233	229.674	239.731	286.889	187.874	260.813	254.666	230.347	211.108		21.2343	205.789	268.819	219.115	229.249	246.633	167.233	217.674	227.731	274.889	175.874	248.813	242.666	218.347	199.108		21.2343	0.8932	0.930145	0.966741	0.939572	0.943694	0.971364	0.921543	0.929076	0.934313	0.940515	0.922079	0.944892	0.936557	0.956872	0.937897	0.00039018	0.019753
21.2564	222.512	269.71	231.719	243.668	260.218	173.146	231.082	240.928	283.306	190.289	264.403	253.764	236.518	214.685		21.2564	210.512	257.71	219.719	231.668	248.218	161.146	219.082	228.928	271.306	178.289	252.403	241.764	224.518	202.685		21.2564	0.913699	0.891707	0.969405	0.949486	0.949759	0.936008	0.927504	0.933959	0.922134	0.95343	0.935383	0.94138	0.963026	0.974063	0.940067	0.000499661	0.0223531
21.2949	222.364	269.917	232.287	239.412	260.234	179.689	230.394	243.139	294.379	190.792	270.906	256.185	234.658	212.636		21.2949	210.364	257.917	220.287	227.412	248.234	167.689	218.394	231.139	282.379	178.792	258.906	244.185	222.658	200.636		21.2949	0.913057	0.892423	0.971911	0.932043	0.94982	0.974013	0.924591	0.942979	0.95977	0.95612	0.959483	0.950806	0.955048	0.964216	0.946163	0.00053838	0.023203
21.3207	224.38	278.727	233.797	239.457	252.181	179.582	228.537	238.321	294.548	190.734	269.484	253.615	236.225	216.809		21.3207	212.38	266.727	221.797	227.457	240.181	167.582	216.537	226.321	282.548	178.734	257.484	241.615	224.225	204.809		21.3207	0.921807	0.922907	0.978574	0.932227	0.919007	0.973391	0.916729	0.923323	0.960344	0.95581	0.954213	0.940799	0.961769	0.98427	0.946084	0.000563764	0.0237437
21.3591	221.244	279.353	232.912	242.975	257.386	171.837	236.173	236.214	297.118	195.932	272.903	256.668	236.857	213.288		21.3591	209.244	267.353	220.912	230.975	245.386	159.837	224.173	224.214	285.118	183.932	260.903	244.668	224.857	201.288		21.3591	0.908195	0.925073	0.974669	0.946646	0.938922	0.928405	0.949057	0.914728	0.96908	0.983607	0.966883	0.952687	0.96448	0.967349	0.94927	0.000547063	0.0233894
21.3812	222.307	277.105	233.198	245.736	252.402	178.032	233.816	244.496	286.336	187.93	261.3	249.666	231.108	215.141		21.3812	210.307	265.105	221.198	233.736	240.402	166.032	221.816	232.496	274.336	175.93	249.3	237.666	219.108	203.141		21.3812	0.912809	0.917294	0.975931	0.957962	0.919852	0.964388	0.939078	0.948516	0.932433	0.940815	0.923884	0.925423	0.939821	0.976254	0.941033	0.000444016	0.0210717
21.4196	225.503	273.347	233.418	243.829	252.139	174.922	238.613	239.775	292.245	191.094	270.087	257.119	233.657	204.14		21.4196	213.503	261.347	221.418	231.829	240.139	162.922	226.613	227.775	280.245	179.094	258.087	245.119	221.657	192.14		21.4196	0.926681	0.904291	0.976901	0.950146	0.918846	0.946324	0.959387	0.929255	0.952517	0.957735	0.956448	0.954443	0.950754	0.923386	0.943365	0.000390724	0.0197668
21.4454	225.076	276.628	230.252	244.462	252.524	174.79	230.444	239.915	297.772	188.099	264.706	262.407	233.011	214.456		21.4454	213.076	264.628	218.252	232.462	240.524	162.79	218.444	227.915	285.772	176.099	252.706	250.407	221.011	202.456		21.4454	0.924828	0.915644	0.962933	0.95274	0.920319	0.945557	0.924803	0.929827	0.971302	0.941719	0.936506	0.975034	0.947983	0.972962	0.94444	0.000412382	0.0203072
21.4838	222.986	277.147	234.976	238.817	257.809	173.11	234.603	236.761	291.733	189.812	270.369	255.55	236.98	213.943		21.4838	210.986	265.147	222.976	226.817	245.809	161.11	222.603	224.761	279.733	177.812	258.369	243.55	224.98	201.943		21.4838	0.915756	0.91744	0.983775	0.929604	0.940541	0.935799	0.94241	0.916959	0.950777	0.950879	0.957493	0.948334	0.965008	0.970497	0.944662	0.000425904	0.0206374
21.5059	224.861	276.996	231.414	242.192	252.845	174.502	233.638	240.122	295.739	187.532	269.954	256.597	235.683	206.804		21.5059	212.861	264.996	219.414	230.192	240.845	162.502	221.638	228.122	283.739	175.532	257.954	244.597	223.683	194.804		21.5059	0.923895	0.916917	0.96806	0.943437	0.921547	0.943884	0.938325	0.930671	0.964393	0.938687	0.955955	0.952411	0.959444	0.936188	0.942415	0.000257925	0.0160601
21.5443	225.039	278.087	229.53	239.361	255.18	176.09	239.659	234.682	296.247	196.046	270.258	257.809	234.315	214.608		21.5443	213.039	266.087	217.53	227.361	243.18	164.09	227.659	222.682	284.247	184.046	258.258	245.809	222.315	202.608		21.5443	0.924667	0.920692	0.959747	0.931834	0.930482	0.953108	0.963815	0.908477	0.966119	0.984217	0.957081	0.95713	0.953577	0.973693	0.948903	0.000486169	0.0220492
21.5701	222.807	277.245	232.6	240.422	251.197	170.185	233.394	239.602	299.657	189.347	265.917	248.333	239.133	213.567		21.5701	210.807	265.245	220.6	228.422	239.197	158.185	221.394	227.602	287.657	177.347	253.917	236.333	227.133	201.567		21.5701	0.914979	0.917779	0.973292	0.936182	0.915241	0.918809	0.937292	0.92855	0.977709	0.948393	0.940994	0.920232	0.974242	0.96869	0.940885	0.00056247	0.0237164
21.6085	222.172	273.599	230.452	238.636	257.588	176.722	240.176	239.954	292.115	187.8	270.291	254.036	233.887	211.114		21.6085	210.172	261.599	218.452	226.636	245.588	164.722	228.176	227.954	280.115	175.8	258.291	242.036	221.887	199.114		21.6085	0.912223	0.905163	0.963815	0.928862	0.939695	0.956779	0.966004	0.929986	0.952075	0.94012	0.957204	0.942439	0.951741	0.956901	0.943072	0.000344122	0.0185505
21.6307	224.537	274.217	226.029	237.25	253.589	173.763	232.712	244.508	292.404	186.811	262.906	254.876	231.613	214.117		21.6307	212.537	262.217	214.029	225.25	241.589	161.763	220.712	232.508	280.404	174.811	250.906	242.876	219.613	202.117		21.6307	0.922488	0.907302	0.944301	0.923182	0.924394	0.939592	0.934404	0.948565	0.953057	0.934831	0.929835	0.94571	0.941987	0.971333	0.937213	0.000248896	0.0157764
21.6691	228.337	280.636	231.337	238.055	249.188	172.492	238.029	238.709	292.697	188.032	265.558	256.838	236.644	215.145		21.6691	216.337	268.636	219.337	226.055	237.188	160.492	226.029	226.709	280.697	176.032	253.558	244.838	224.644	203.145		21.6691	0.938982	0.929512	0.96772	0.926481	0.907554	0.932209	0.956914	0.924906	0.954053	0.94136	0.939663	0.953349	0.963566	0.976273	0.943753	0.000364699	0.0190971
21.6949	222.925	272.216	228.3	245.017	252.65	172.606	233.227	241.852	295.553	183.589	264.49	254.328	241.977	213.226		21.6949	210.925	260.216	216.3	233.017	240.65	160.606	221.227	229.852	283.553	171.589	252.49	242.328	229.977	201.226		21.6949	0.915492	0.900378	0.954321	0.955015	0.920801	0.932872	0.936585	0.937729	0.96376	0.917601	0.935706	0.943576	0.986441	0.967051	0.940523	0.000539965	0.0232372
21.7333	224.968	275.954	226.241	245.847	259.434	175.885	230.522	241.062	302.683	186.645	265.845	259.291	235.379	213.371		21.7333	212.968	263.954	214.241	233.847	247.434	163.885	218.522	229.062	290.683	174.645	253.845	247.291	223.379	201.371		21.7333	0.924359	0.913312	0.945236	0.958417	0.946759	0.951917	0.925133	0.934506	0.987994	0.933943	0.940727	0.962901	0.95814	0.967748	0.946507	0.00039491	0.0198723
21.7554	223.508	274.891	229.066	244.082	255.538	170.511	235.35	242.106	296.33	188.952	263.16	254.129	240.471	210.398		21.7554	211.508	262.891	217.066	232.082	243.538	158.511	223.35	230.106	284.33	176.952	251.16	242.129	228.471	198.398		21.7554	0.918022	0.909634	0.9577	0.951183	0.931851	0.920703	0.945573	0.938765	0.966401	0.94628	0.930777	0.942801	0.979982	0.95346	0.942367	0.000372733	0.0193063
21.7938	224.694	271.128	230.589	240.293	256.447	175.716	236.297	241.224	300.6	185.051	266.873	254.781	232.165	211.87		21.7938	212.694	259.128	218.589	228.293	244.447	163.716	224.297	229.224	288.6	173.051	254.873	242.781	220.165	199.87		21.7938	0.92317	0.896613	0.96442	0.935654	0.93533	0.950936	0.949582	0.935167	0.980914	0.925419	0.944537	0.94534	0.944355	0.960534	0.942284	0.000410828	0.0202689
21.8196	227.117	279.114	226.272	248.605	251.559	175.008	232.014	233.822	287.148	185.011	266.35	260.233	236.023	211.716		21.8196	215.117	267.114	214.272	236.605	239.559	163.008	220.014	221.822	275.148	173.011	254.35	248.233	224.023	199.716		21.8196	0.933686	0.924246	0.945373	0.96972	0.916627	0.946823	0.931449	0.904969	0.935193	0.925205	0.942599	0.966569	0.960903	0.959794	0.940225	0.00037508	0.019367
21.858	226.76	270.312	229.129	242.551	255.297	171.359	238.838	244.351	298.919	188.229	267.98	255.841	233.986	213.798		21.858	214.76	258.312	217.129	230.551	243.297	159.359	226.838	232.351	286.919	176.229	255.98	243.841	221.986	201.798		21.858	0.932137	0.89379	0.957978	0.944908	0.930929	0.925628	0.960339	0.947924	0.975201	0.942414	0.948639	0.949467	0.952165	0.9698	0.945094	0.000414746	0.0203653
21.8801	225.325	279.958	232.685	235.543	249.62	175.344	235.943	236.653	291.121	186.561	271.176	256.13	232.46	211.785		21.8801	213.325	267.958	220.685	223.543	237.62	163.344	223.943	224.653	279.121	174.561	259.176	244.13	220.46	199.785		21.8801	0.925909	0.927166	0.973667	0.916186	0.909207	0.948775	0.948083	0.916518	0.948697	0.933494	0.960483	0.950592	0.94562	0.960126	0.940323	0.000368514	0.0191967
21.9186	219.862	274.226	229.886	244.776	255.29	172.344	234.55	236.989	292.072	182.64	273.315	254.837	236.825	213.595		21.9186	207.862	262.226	217.886	232.776	243.29	160.344	222.55	224.989	280.072	170.64	261.315	242.837	224.825	201.595		21.9186	0.902197	0.907333	0.961318	0.954027	0.930903	0.93135	0.942186	0.917889	0.951929	0.912526	0.96841	0.945558	0.964343	0.968824	0.939914	0.000535165	0.0231336
21.9462	221.986	276.833	232.409	242.971	258.064	173.477	240.719	239.35	296.918	188.627	267.518	257.649	236.543	211.818		21.9462	209.986	264.833	220.409	230.971	246.064	161.477	228.719	227.35	284.918	176.627	255.518	245.649	224.543	199.818		21.9462	0.911416	0.916353	0.97245	0.946629	0.941517	0.937931	0.968303	0.927521	0.9684	0.944542	0.946927	0.956507	0.963133	0.960284	0.94728	0.000368373	0.019193
21.9846	226.955	277.596	229.051	236.052	254.528	181.519	231.126	240.906	291.457	179.971	266.672	261.471	231.471	212.284		21.9846	214.955	265.596	217.051	224.052	242.528	169.519	219.126	228.906	279.457	167.971	254.672	249.471	219.471	200.284		21.9846	0.932983	0.918993	0.957634	0.918272	0.927987	0.984642	0.92769	0.933869	0.949839	0.898253	0.943792	0.971389	0.941378	0.962524	0.94066	0.000534026	0.023109
22.0067	227.007	275.711	230.241	245.15	254.645	173.467	231.483	238.274	296.751	189.255	271.994	257.533	230.922	213.958		22.0067	215.007	263.711	218.241	233.15	242.645	161.467	219.483	226.274	284.751	177.255	259.994	245.533	218.922	201.958		22.0067	0.933209	0.912471	0.962884	0.95556	0.928435	0.937873	0.929201	0.923132	0.967832	0.947901	0.963515	0.956055	0.939023	0.970569	0.944833	0.000335799	0.0183248
22.0451	220.572	289.213	233.159	244.701	257.956	177.285	233.192	246.494	290.822	188.87	266.484	251.735	237.456	214.618		22.0451	208.572	277.213	221.159	232.701	245.956	165.285	221.192	234.494	278.822	176.87	254.484	239.735	225.456	202.618		22.0451	0.905279	0.95919	0.975759	0.95372	0.941103	0.960049	0.936437	0.956667	0.94768	0.945842	0.943095	0.933479	0.967049	0.973741	0.949935	0.000335989	0.01833
22.0709	225.219	283.112	234.262	245.542	249.275	169.573	234.639	238.442	289.555	187.952	265.425	251.872	232.488	210.749		22.0709	213.219	271.112	222.262	233.542	237.275	157.573	222.639	226.442	277.555	175.952	253.425	239.872	220.488	198.749		22.0709	0.925448	0.938079	0.980625	0.957166	0.907887	0.915255	0.942563	0.923817	0.943374	0.940933	0.939171	0.934013	0.94574	0.955147	0.93923	0.00033657	0.0183459
22.1094	222.918	277.108	229.077	244.571	255.26	174.776	236.586	240.244	298.686	189.438	265.253	251.642	238.405	211.291		22.1094	210.918	265.108	217.077	232.571	243.26	162.776	224.586	228.244	286.686	177.438	253.253	239.642	226.405	199.291		22.1094	0.915461	0.917305	0.957749	0.953187	0.930788	0.945476	0.950805	0.931169	0.974409	0.948879	0.938533	0.933117	0.97112	0.957752	0.944696	0.000323298	0.0179805
22.1315	227.954	275.628	225.746	242.711	255.724	174.589	237.2	242.008	294.106	183.342	264.167	256.092	236.298	207.622		22.1315	215.954	263.628	213.746	230.711	243.724	162.589	225.2	230.008	282.106	171.342	252.167	244.092	224.298	195.622		22.1315	0.937319	0.912184	0.943052	0.945564	0.932563	0.94439	0.953405	0.938365	0.958842	0.91628	0.934509	0.950444	0.962082	0.940119	0.940651	0.000201288	0.0141876
22.1699	227.547	281.272	230.116	243.824	254.599	170.281	233.838	238.99	293.838	188.042	264.83	258.566	239.834	206.188		22.1699	215.547	269.272	218.116	231.824	242.599	158.281	221.838	226.99	281.838	176.042	252.83	246.566	227.834	194.188		22.1699	0.935553	0.931713	0.962333	0.950125	0.928259	0.919367	0.939172	0.926053	0.957931	0.941414	0.936966	0.960078	0.977249	0.933228	0.942817	0.000269742	0.0164238
22.1957	220.514	274.296	231.272	247.59	255.212	168.507	233.991	239.384	294.938	186.533	265.465	259.967	228.094	212.956		22.1957	208.514	262.296	219.272	235.59	243.212	156.507	221.991	227.384	282.938	174.533	253.465	247.967	216.094	200.956		22.1957	0.905027	0.907575	0.967433	0.96556	0.930604	0.909063	0.939819	0.92766	0.96167	0.933344	0.939319	0.965533	0.926893	0.965753	0.938947	0.00052799	0.022978
22.2341	221.512	277.183	227.229	242.519	262.287	172.357	234.086	247.816	287.735	187.482	266.583	253.612	234.426	211.473		22.2341	209.512	265.183	215.229	230.519	250.287	160.357	222.086	235.816	275.735	175.482	254.583	241.612	222.426	199.473		22.2341	0.909359	0.917564	0.949595	0.944777	0.957675	0.931425	0.940221	0.96206	0.937188	0.938419	0.943462	0.940788	0.954053	0.958626	0.941801	0.000227062	0.0150686
22.2562	224.489	285.907	227.12	238.006	254.847	173.106	233.194	239.853	289.289	188.907	269.137	258.784	233.17	212.914		22.2562	212.489	273.907	215.12	226.006	242.847	161.106	221.194	227.853	277.289	176.907	257.137	246.784	221.17	200.914		22.2562	0.92228	0.94775	0.949115	0.92628	0.929207	0.935776	0.936445	0.929574	0.94247	0.94604	0.952927	0.960926	0.948665	0.965552	0.942358	0.000169138	0.0130053
22.2946	222.411	277.884	230.348	245.277	260.405	168.457	234.405	240.424	294.579	189.654	271.81	256.714	232.848	216.043		22.2946	210.411	265.884	218.348	233.277	248.405	156.457	222.405	228.424	282.579	177.654	259.81	244.714	220.848	204.043		22.2946	0.913261	0.91999	0.963357	0.95608	0.950474	0.908772	0.941572	0.931903	0.96045	0.950034	0.962833	0.952866	0.947284	0.980589	0.945676	0.000425203	0.0206204
22.3204	226.163	278.742	230.082	246.554	253.316	170.101	234.276	237.248	293.292	193.096	268.972	255.951	231.405	208.529		22.3204	214.163	266.742	218.082	234.554	241.316	158.101	222.276	225.248	281.292	181.096	256.972	243.951	219.405	196.529		22.3204	0.929546	0.922959	0.962183	0.961314	0.923349	0.918321	0.941026	0.918946	0.956075	0.968441	0.952315	0.949895	0.941095	0.944478	0.942139	0.000293208	0.0171233
22.3588	224.565	277.349	228.614	244.069	255.181	168.496	234.739	245.417	296.064	184.365	267.882	253.382	233.252	214.993		22.3588	212.565	265.349	216.614	232.069	243.181	156.496	222.739	233.417	284.064	172.365	255.882	241.382	221.252	202.993		22.3588	0.92261	0.918139	0.955706	0.951129	0.930485	0.908999	0.942986	0.952273	0.965497	0.921751	0.948276	0.939892	0.949017	0.975543	0.941593	0.000363288	0.0190601
22.381	222.12	275.092	230.951	241.737	254.914	174.376	236.705	242.843	289.42	186.795	269.08	258.059	234.181	217.293		22.381	210.12	263.092	218.951	229.737	242.914	162.376	224.705	230.843	277.42	174.795	257.08	246.059	222.181	205.293		22.381	0.911998	0.910329	0.966017	0.941572	0.929464	0.943153	0.951309	0.941772	0.942915	0.934745	0.952716	0.958103	0.953002	0.986596	0.944549	0.000397835	0.0199458
22.4194	222.747	270.353	232.447	241.727	257.505	167.872	235.834	243.079	291.808	190.767	268.828	250.088	237.579	210.683		22.4194	210.747	258.353	220.447	229.727	245.505	155.872	223.834	231.079	279.808	178.767	256.828	238.088	225.579	198.683		22.4194	0.914719	0.893932	0.972617	0.941531	0.939378	0.905374	0.947622	0.942735	0.951032	0.955986	0.951782	0.927066	0.967577	0.95483	0.940441	0.000519505	0.0227927
22.4452	220.468	278.447	229.11	240.717	255.198	177.502	234.708	244.917	294.113	184.431	268.049	257.284	232.792	210.248		22.4452	208.468	266.447	217.11	228.717	243.198	165.502	222.708	232.917	282.113	172.431	256.049	245.284	220.792	198.248		22.4452	0.904827	0.921938	0.957894	0.937391	0.93055	0.96131	0.942855	0.950233	0.958866	0.922103	0.948895	0.955086	0.947044	0.952739	0.942267	0.000282271	0.0168009
22.4836	227.506	282.828	226.377	243.054	260.059	174.081	234.133	241.96	287.467	188.23	267.371	250.755	233.282	211.966		22.4836	215.506	270.828	214.377	231.054	248.059	162.081	222.133	229.96	275.467	176.23	255.371	238.755	221.282	199.966		22.4836	0.935375	0.937097	0.945836	0.946969	0.94915	0.941439	0.94042	0.93817	0.936277	0.942419	0.946382	0.929663	0.949146	0.960996	0.94281	6.02306e-05	0.00776083
22.5057	225.675	277.561	229.424	249.541	255.356	170.746	232.012	239.414	292.402	185.264	269.18	258.054	237.971	209.619		22.5057	213.675	265.561	217.424	237.541	243.356	158.746	220.012	227.414	280.402	173.264	257.18	246.054	225.971	197.619		22.5057	0.927428	0.918872	0.95928	0.973556	0.931155	0.922068	0.931441	0.927783	0.95305	0.926558	0.953086	0.958084	0.969258	0.949716	0.942953	0.00033863	0.0184019
22.5441	222.815	283.418	231.382	241.532	256.006	176.014	232.635	242.456	295.609	189.873	268.603	259.042	230.781	211.065		22.5441	210.815	271.418	219.382	229.532	244.006	164.014	220.635	230.456	283.609	177.873	256.603	247.042	218.781	199.065		22.5441	0.915014	0.939138	0.967919	0.940732	0.933642	0.952667	0.934078	0.940193	0.963951	0.951205	0.950948	0.961931	0.938418	0.956666	0.946179	0.000206676	0.0143762
22.5699	217.947	273.017	228.932	247.212	259.956	172.009	229.955	242.867	296.867	186.275	267.194	257.547	233.911	214.972		22.5699	205.947	261.017	216.932	235.212	247.956	160.009	217.955	230.867	284.867	174.275	255.194	245.547	221.911	202.972		22.5699	0.893885	0.90315	0.957109	0.964011	0.948756	0.929404	0.922732	0.94187	0.968226	0.931965	0.945726	0.95611	0.951844	0.975442	0.942159	0.000563779	0.023744
22.6083	223.119	278.495	224.525	244.935	260.24	176.998	229.953	234.893	292.659	186.514	271.823	257.799	236.674	214.731		22.6083	211.119	266.495	212.525	232.935	248.24	164.998	217.953	222.893	280.659	174.514	259.823	245.799	224.674	202.731		22.6083	0.916334	0.922104	0.937665	0.954679	0.949843	0.958382	0.922724	0.909338	0.953924	0.933243	0.962881	0.957091	0.963695	0.974284	0.944013	0.000410861	0.0202697
22.6304	228.284	276.257	227.519	242.438	256.817	175.797	234.548	240.264	298.504	187.202	258.124	253.314	233.514	212.777		22.6304	216.284	264.257	215.519	230.438	244.817	163.797	222.548	228.264	286.504	175.202	246.124	241.314	221.514	200.777		22.6304	0.938752	0.91436	0.950875	0.944445	0.936745	0.951406	0.942177	0.93125	0.97379	0.936922	0.912114	0.939627	0.950141	0.964893	0.941964	0.000278194	0.0166791
22.6689	220.431	278.257	236.769	235.828	260.336	170.967	235.508	243.152	292.373	186.639	263.634	255.485	233.462	216.456		22.6689	208.431	266.257	224.769	223.828	248.336	158.967	223.508	231.152	280.373	174.639	251.634	243.485	221.462	204.456		22.6689	0.904667	0.921281	0.991686	0.917354	0.95021	0.923352	0.946242	0.943033	0.952952	0.933911	0.932533	0.948081	0.949918	0.982574	0.942699	0.00056519	0.0237737
22.6947	229.485	277.77	224.046	239.872	257.669	170.22	229.285	237.679	293.316	186.352	270.209	257.99	234.992	212.177		22.6947	217.485	265.77	212.046	227.872	245.669	158.22	217.285	225.679	281.316	174.352	258.209	245.99	222.992	200.177		22.6947	0.943964	0.919595	0.935552	0.933928	0.940005	0.919013	0.919896	0.920704	0.956157	0.932376	0.9569	0.957835	0.95648	0.96201	0.939601	0.00026018	0.0161301
22.7331	223.043	276.758	231.84	243.305	255.451	171.687	230.677	240.769	296.911	187.275	265.377	253.955	232.779	208.062		22.7331	211.043	264.758	219.84	231.305	243.451	159.687	218.677	228.769	284.911	175.275	253.377	241.955	220.779	196.062		22.7331	0.916004	0.916094	0.969939	0.947998	0.931519	0.927534	0.925789	0.933311	0.968376	0.937312	0.938993	0.942123	0.946988	0.942234	0.938872	0.000264282	0.0162568
22.7552	231.936	273.39	231.693	238.822	254.502	171.611	234.929	240.798	291.726	192.182	268.703	257.577	232.931	219.82		22.7552	219.936	261.39	219.693	226.822	242.502	159.611	222.929	228.798	279.726	180.182	256.703	245.577	220.931	207.82		22.7552	0.954603	0.90444	0.969291	0.929625	0.927887	0.927092	0.94379	0.933429	0.950753	0.963553	0.951319	0.956227	0.94764	0.99874	0.947028	0.000514873	0.0226908
22.7936	222.472	274.786	228.916	246.618	253.889	174.11	232.909	237.882	294.067	186.569	268.216	253.704	236.727	212.75		22.7936	210.472	262.786	216.916	234.618	241.889	162.11	220.909	225.882	282.067	174.569	256.216	241.704	224.727	200.75		22.7936	0.913525	0.90927	0.957038	0.961576	0.925542	0.941607	0.935238	0.921532	0.95871	0.933537	0.949514	0.941146	0.963922	0.964763	0.941209	0.000355777	0.0188621
22.8212	225.036	275.339	229.916	240.107	252.511	175.108	229.432	236.418	301.064	184.248	268.114	265.629	225.563	215.632		22.8212	213.036	263.339	217.916	228.107	240.511	163.108	217.432	224.418	289.064	172.248	256.114	253.629	213.563	203.632		22.8212	0.924654	0.911184	0.961451	0.934891	0.920269	0.947404	0.920518	0.91556	0.982492	0.921125	0.949136	0.987579	0.916037	0.978614	0.94078	0.000733762	0.027088
22.8597	227.113	276.221	231.916	240.467	251.928	168.275	236.091	236.566	296.575	179.915	269.056	251.115	239.42	221.059		22.8597	215.113	264.221	219.916	228.467	239.928	156.275	224.091	224.566	284.575	167.915	257.056	239.115	227.42	209.059		22.8597	0.933669	0.914236	0.970275	0.936367	0.918038	0.907715	0.94871	0.916164	0.967234	0.897953	0.952627	0.931065	0.975474	1.00469	0.941016	0.000921577	0.0303575
22.8818	222.377	281.679	229.147	238.197	253.52	174.48	233.736	241.149	297.489	191.162	264.034	254.471	236.074	208.093		22.8818	210.377	269.679	217.147	226.197	241.52	162.48	221.736	229.149	285.489	179.162	252.034	242.471	224.074	196.093		22.8818	0.913113	0.933121	0.958058	0.927063	0.92413	0.943757	0.93874	0.934861	0.970341	0.958099	0.934016	0.944133	0.961121	0.942383	0.941638	0.000251759	0.0158669
22.9202	224.865	270.039	230.923	247.272	252.253	172.935	233.581	244.386	299.475	186.866	262.869	257.426	236.703	208.397		22.9202	212.865	258.039	218.923	235.272	240.253	160.935	221.581	232.386	287.475	174.866	250.869	245.426	224.703	196.397		22.9202	0.923912	0.892845	0.965893	0.964257	0.919282	0.934783	0.938083	0.948067	0.977091	0.935125	0.929698	0.955639	0.963819	0.943844	0.94231	0.000501853	0.0224021
22.946	223.303	274.724	228.8	247.122	254.365	168.449	230.208	237.186	296.16	196.222	264.366	260.861	237.2	216.257		22.946	211.303	262.724	216.8	235.122	242.365	156.449	218.208	225.186	284.16	184.222	252.366	248.861	225.2	204.257		22.946	0.917132	0.909056	0.956527	0.963642	0.927363	0.908726	0.923804	0.918693	0.965823	0.985158	0.935246	0.969014	0.965951	0.981617	0.944839	0.000754976	0.0274768
22.9844	227.869	280.825	233.141	244.644	251.364	174.774	234.338	245.318	305.927	188.466	268.433	253.883	241.718	214.918		22.9844	215.869	268.825	221.141	232.644	239.364	162.774	222.338	233.318	293.927	176.466	256.433	241.883	229.718	202.918		22.9844	0.93695	0.930166	0.975679	0.953486	0.91588	0.945464	0.941288	0.951869	0.99902	0.943681	0.950318	0.941843	0.98533	0.975182	0.953297	0.000518392	0.0227682
23.0065	233.188	279.361	229.966	246.096	254.787	169.444	232.535	243.366	295.487	184.301	270.307	256.167	233.419	209.47		23.0065	221.188	267.361	217.966	234.096	242.787	157.444	220.535	231.366	283.487	172.301	258.307	244.167	221.419	197.47		23.0065	0.960037	0.9251	0.961671	0.959437	0.928978	0.914505	0.933655	0.943906	0.963536	0.921408	0.957263	0.950736	0.949733	0.949	0.944212	0.000272165	0.0164974
23.0449	220.492	272.454	230.969	243.288	252.02	179.476	234.721	245.638	301.973	182.374	263.748	267.521	228.358	214.685		23.0449	208.492	260.454	218.969	231.288	240.02	167.476	222.721	233.638	289.973	170.374	251.748	255.521	216.358	202.685		23.0449	0.904932	0.901201	0.966096	0.947929	0.91839	0.972776	0.94291	0.953175	0.985581	0.911103	0.932956	0.994947	0.928025	0.974063	0.945292	0.000930407	0.0305026
23.0707	219.936	271.667	229.977	237.434	258.136	174.583	233.798	238.584	300.391	186.14	265.409	254.757	239.836	215.411		23.0707	207.936	259.667	217.977	225.434	246.136	162.583	221.798	226.584	288.391	174.14	253.409	242.757	227.836	203.411		23.0707	0.902518	0.898478	0.96172	0.923936	0.941792	0.944355	0.939002	0.924396	0.980204	0.931243	0.939111	0.945246	0.977258	0.977552	0.941915	0.000661051	0.0257109
23.1091	226.653	275.594	233.143	248.124	257.504	175.026	234.918	243.169	299.671	183.442	268.623	258.487	232.271	216.415		23.1091	214.653	263.594	221.143	236.124	245.504	163.026	222.918	231.169	287.671	171.442	256.623	246.487	220.271	204.415		23.1091	0.931673	0.912066	0.975688	0.967749	0.939374	0.946928	0.943744	0.943102	0.977757	0.916815	0.951022	0.95977	0.944809	0.982377	0.949491	0.000461432	0.021481
23.1313	228.83	274.66	231.644	246.652	260.602	170.255	229.673	241.606	304.724	186.069	272.562	256.787	237.791	213.157		23.1313	216.83	262.66	219.644	234.652	248.602	158.255	217.673	229.606	292.724	174.069	260.562	244.787	225.791	201.157		23.1313	0.941122	0.908834	0.969074	0.961716	0.951228	0.919216	0.921539	0.936725	0.994931	0.930863	0.96562	0.953151	0.968486	0.966719	0.94923	0.000573992	0.0239581
23.1697	224.517	272.291	231.702	245.552	258.959	172.21	233.117	242.15	301.078	190.968	273.436	256.341	234.86	212.161		23.1697	212.517	260.291	219.702	233.552	246.959	160.21	221.117	230.15	289.078	178.968	261.436	244.341	222.86	200.161		23.1697	0.922402	0.900637	0.96933	0.957207	0.944941	0.930571	0.936119	0.938945	0.982539	0.957061	0.968859	0.951414	0.955914	0.961933	0.94842	0.000457739	0.0213948
23.1955	227.176	277.26	232.155	243.368	256.669	179.339	232.637	239.735	296.035	186.473	270.371	257.328	237.015	213.357		23.1955	215.176	265.26	220.155	231.368	244.669	167.339	220.637	227.735	284.035	174.473	258.371	245.328	225.015	201.357		23.1955	0.933943	0.917831	0.971329	0.948256	0.936179	0.97198	0.934087	0.929092	0.965399	0.933023	0.9575	0.955257	0.965158	0.967681	0.949051	0.00032724	0.0180898
23.2339	225.566	273.944	231.07	245.017	256.359	175.174	233.296	242.832	293.213	185.108	271.031	260.931	238.778	217.724		23.2339	213.566	261.944	219.07	233.017	244.359	163.174	221.296	230.832	281.213	173.108	259.031	248.931	226.778	205.724		23.2339	0.926955	0.906357	0.966542	0.955015	0.934993	0.947788	0.936877	0.941727	0.955807	0.925724	0.959946	0.969286	0.97272	0.988667	0.949172	0.000484696	0.0220158
23.256	224.718	272.429	227.342	248.053	249.905	174.319	232.803	238.747	299.274	185.455	267.349	260.716	234.527	209.043		23.256	212.718	260.429	215.342	236.053	237.905	162.319	220.803	226.747	287.274	173.455	255.349	248.716	222.527	197.043		23.256	0.923274	0.901115	0.950094	0.967458	0.910298	0.942821	0.93479	0.925061	0.976408	0.927579	0.946301	0.968449	0.954486	0.946948	0.941077	0.00048914	0.0221165
23.2944	230.346	267.57	233.107	240.388	256.219	176.642	231.885	246.325	287.94	183.376	261.343	255.725	236.341	213.227		23.2944	218.346	255.57	221.107	228.388	244.219	164.642	219.885	234.325	275.94	171.376	249.343	243.725	224.341	201.227		23.2944	0.947702	0.884302	0.975529	0.936043	0.934457	0.956314	0.930903	0.955977	0.937885	0.916462	0.924043	0.949015	0.962267	0.967056	0.941283	0.000551821	0.0234909
23.3202	233.665	276.537	228.467	246.69	259.67	173.12	233.537	243.9	291.059	189.335	267.828	256.458	236.628	212.016		23.3202	221.665	264.537	216.467	234.69	247.67	161.12	221.537	231.9	279.059	177.335	255.828	244.458	224.628	200.016		23.3202	0.962107	0.915329	0.955057	0.961872	0.947662	0.935857	0.937897	0.946084	0.948486	0.948328	0.948076	0.951869	0.963498	0.961236	0.948811	0.000167954	0.0129597
23.3586	222.109	270.798	225.239	244.912	256.957	174.41	236.69	241.891	297.397	187.977	265.719	257.256	231.09	212.353		23.3586	210.109	258.798	213.239	232.912	244.957	162.41	224.69	229.891	285.397	175.977	253.719	245.256	219.09	200.353		23.3586	0.91195	0.895472	0.940815	0.954584	0.937281	0.94335	0.951246	0.937888	0.970028	0.941066	0.94026	0.954977	0.939744	0.962856	0.941537	0.000365312	0.0191131
23.3807	221.307	278.651	227.35	242.353	253.874	174.72	224.727	237.819	292.231	188.06	270.406	255.598	233.286	219.14		23.3807	209.307	266.651	215.35	230.353	241.874	162.72	212.727	225.819	280.231	176.06	258.406	243.598	221.286	207.14		23.3807	0.908469	0.922644	0.950129	0.944096	0.925484	0.945151	0.900599	0.921275	0.952469	0.94151	0.95763	0.948521	0.949163	0.995472	0.940187	0.000558225	0.0236268
23.4191	224.531	270.516	232.107	248.348	255.202	171.152	236.895	246.176	289.602	187.541	265.632	258.423	233.566	214.454		23.4191	212.531	258.516	220.107	236.348	243.202	159.152	224.895	234.176	277.602	175.541	253.632	246.423	221.566	202.454		23.4191	0.922462	0.894496	0.971117	0.968667	0.930566	0.924426	0.952114	0.95537	0.943534	0.938735	0.939938	0.959521	0.950364	0.972953	0.94459	0.000475097	0.0217967
23.4449	221.543	280.234	229.525	240.156	259.183	173.925	231.507	245.091	292.321	190.758	270.697	260.936	235.709	213.024		23.4449	209.543	268.234	217.525	228.156	247.183	161.925	219.507	233.091	280.321	178.758	258.697	248.936	223.709	201.024		23.4449	0.909493	0.928121	0.959725	0.935092	0.945798	0.940533	0.929303	0.950943	0.952775	0.955938	0.958708	0.969306	0.959556	0.96608	0.947241	0.000285205	0.016888
23.4834	224.894	277.263	238.239	245.675	260.831	174.053	229.015	241.374	295.408	187.801	268.742	258.594	227.483	215.116		23.4834	212.894	265.263	226.239	233.675	248.831	162.053	217.015	229.374	283.408	175.801	256.742	246.594	215.483	203.116		23.4834	0.924038	0.917841	0.998172	0.957712	0.952104	0.941276	0.918753	0.935779	0.963268	0.940125	0.951463	0.960187	0.924272	0.976134	0.947223	0.000535674	0.0231446
23.5055	230.778	273.591	226.904	244.326	255.906	175.862	238.614	238.077	289.421	188.418	266.656	258.711	232.669	211.887		23.5055	218.778	261.591	214.904	232.326	243.906	163.862	226.614	226.077	277.421	176.418	254.656	246.711	220.669	199.887		23.5055	0.949577	0.905136	0.948162	0.952183	0.93326	0.951784	0.959391	0.922328	0.942918	0.943425	0.943733	0.960642	0.946516	0.960616	0.944262	0.000236025	0.0153631
23.5439	227.858	273.72	231.098	240.431	255.761	172.258	229.748	243.495	297.445	190.111	265.446	256.91	232.001	211.862		23.5439	215.858	261.72	219.098	228.431	243.761	160.258	217.748	231.495	285.445	178.111	253.446	244.91	220.001	199.862		23.5439	0.936903	0.905582	0.966666	0.936219	0.932705	0.93085	0.921856	0.944432	0.970191	0.952478	0.939248	0.953629	0.943651	0.960496	0.942493	0.000308095	0.0175526
23.5697	224.518	274.367	233.142	246.143	254.49	168.945	232.198	238.855	289.257	188.011	272.803	258.279	237.951	211.7		23.5697	212.518	262.367	221.142	234.143	242.49	156.945	220.198	226.855	277.257	176.011	260.803	246.279	225.951	199.7		23.5697	0.922406	0.907821	0.975684	0.95963	0.927841	0.911607	0.932228	0.925502	0.942361	0.941248	0.966513	0.95896	0.969173	0.959717	0.942906	0.000493799	0.0222216
23.6081	228.084	276.119	235.661	247.82	255.546	178.819	235.561	242.616	293.276	186.745	266.316	261.729	232.412	213.819		23.6081	216.084	264.119	223.661	235.82	243.546	166.819	223.561	230.616	281.276	174.745	254.316	249.729	220.412	201.819		23.6081	0.937884	0.913883	0.986798	0.966503	0.931882	0.968959	0.946466	0.940846	0.956021	0.934478	0.942473	0.972394	0.945414	0.969901	0.950993	0.000392329	0.0198073
23.6302	228.052	273.521	231.625	244.288	255.483	168.386	229.593	244.295	300.808	192.856	266.43	257.978	236.09	209.316		23.6302	216.052	261.521	219.625	232.288	243.483	156.386	217.593	232.295	288.808	180.856	254.43	245.978	224.09	197.316		23.6302	0.937745	0.904893	0.968991	0.952027	0.931641	0.90836	0.9212	0.947696	0.981621	0.967158	0.942895	0.957788	0.96119	0.94826	0.945105	0.000511802	0.022623
23.6686	217.865	272.951	229.875	243.941	254.846	169.194	235.114	236.125	295.501	191.45	271.599	257.193	231.429	216.867		23.6686	205.865	260.951	217.875	231.941	242.846	157.194	223.114	224.125	283.501	179.45	259.599	245.193	219.429	204.867		23.6686	0.893529	0.902921	0.96127	0.950605	0.929204	0.913053	0.944574	0.914364	0.963584	0.959639	0.962051	0.954731	0.941198	0.984549	0.941091	0.000710347	0.0266523
23.6963	224.872	279.551	235.374	247.774	256.719	174.602	232.509	244.079	293.204	185.751	271.656	257.127	231.073	214.95		23.6963	212.872	267.551	223.374	235.774	244.719	162.602	220.509	232.079	281.204	173.751	259.656	245.127	219.073	202.95		23.6963	0.923942	0.925758	0.985531	0.966314	0.93637	0.944465	0.933545	0.946814	0.955776	0.929162	0.962262	0.954474	0.939671	0.975336	0.94853	0.000357612	0.0189106
23.7347	226.291	269.023	229.004	240.828	265.978	172.31	228.198	242.201	293.807	189.734	266.914	251.891	231.666	212.175		23.7347	214.291	257.023	217.004	228.828	253.978	160.31	216.198	230.201	281.807	177.734	254.914	239.891	219.666	200.175		23.7347	0.930101	0.88933	0.957427	0.937846	0.971798	0.931152	0.915294	0.939153	0.957826	0.950462	0.944689	0.934087	0.942214	0.962	0.940241	0.00043435	0.0208411
23.7568	223.492	281.554	235.075	236.478	259.404	170.711	228.615	245.44	294.74	190.331	269.909	256.928	231.129	215.985		23.7568	211.492	269.554	223.075	224.478	247.404	158.711	216.615	233.44	282.74	178.331	257.909	244.928	219.129	203.985		23.7568	0.917953	0.932689	0.984212	0.920018	0.946644	0.921865	0.917059	0.952367	0.960997	0.953655	0.955788	0.9537	0.939911	0.98031	0.945512	0.000477664	0.0218555
23.7952	223.966	270.296	227.436	249.226	253.654	173.097	230.933	239.464	294.691	192.921	270.212	258.695	228.644	217.039		23.7952	211.966	258.296	215.436	237.226	241.654	161.097	218.933	227.464	282.691	180.921	258.212	246.695	216.644	205.039		23.7952	0.92001	0.893735	0.950509	0.972265	0.924643	0.935724	0.926873	0.927987	0.960831	0.967505	0.956911	0.96058	0.929252	0.985375	0.943728	0.000626319	0.0250264
23.821	224.57	267.9	230.919	248.013	252.645	175.079	230.211	240.533	294.987	191.317	265.667	255.762	229.579	212.044		23.821	212.57	255.9	218.919	236.013	240.645	163.079	218.211	228.533	282.987	179.317	253.667	243.762	217.579	200.044		23.821	0.922632	0.885444	0.965876	0.967294	0.920782	0.947236	0.923816	0.932348	0.961837	0.958928	0.940067	0.949159	0.933262	0.961371	0.940718	0.000526811	0.0229524
23.8594	224.697	273.382	235.135	245.476	256.39	173.468	230.302	239.578	290.258	189.076	267	260.835	230.139	215.418		23.8594	212.697	261.382	223.135	233.476	244.39	161.468	218.302	227.578	278.258	177.076	255	248.835	218.139	203.418		23.8594	0.923183	0.904412	0.984477	0.956896	0.935111	0.937878	0.924202	0.928452	0.945763	0.946943	0.945007	0.968913	0.935664	0.977585	0.943892	0.000491242	0.022164
23.8815	225.865	274.612	231.649	245.85	260.052	170.897	232.745	246.861	295.024	188.003	273.108	252.86	230.864	210.692		23.8815	213.865	262.612	219.649	233.85	248.052	158.897	220.745	234.861	283.024	176.003	261.108	240.86	218.864	198.692		23.8815	0.928252	0.908668	0.969097	0.958429	0.949123	0.922945	0.934544	0.958164	0.961962	0.941205	0.967643	0.93786	0.938774	0.954873	0.94511	0.000319183	0.0178657
23.92	225.411	271.504	235.461	246.792	256.013	173.746	234.254	245.113	289.494	188.137	272.576	254.082	233.699	211.498		23.92	213.411	259.504	223.461	234.792	244.013	161.746	222.254	233.113	277.494	176.137	260.576	242.082	221.699	199.498		23.92	0.926282	0.897914	0.985915	0.96229	0.933669	0.939493	0.940933	0.951033	0.943167	0.941922	0.965672	0.942618	0.950934	0.958747	0.945756	0.000416467	0.0204075
23.9458	227.653	276.28	229.089	246.365	250.617	175.425	232.826	241.248	283.239	189.178	265.787	255.924	230.906	214.121		23.9458	215.653	264.28	217.089	234.365	238.617	163.425	220.826	229.248	271.239	177.178	253.787	243.924	218.906	202.121		23.9458	0.936013	0.91444	0.957802	0.96054	0.913022	0.949246	0.934887	0.935265	0.921907	0.947489	0.940512	0.94979	0.938954	0.971352	0.940801	0.000286498	0.0169262
23.9842	222.14	278.085	228.25	241.759	256.542	178.398	229.515	240.087	293.283	189.838	270.727	259.565	233.962	212.328		23.9842	210.14	266.085	216.25	229.759	244.542	166.398	217.515	228.087	281.283	177.838	258.727	247.565	221.962	200.328		23.9842	0.912084	0.920685	0.9541	0.941662	0.935693	0.966514	0.92087	0.930528	0.956045	0.951018	0.958819	0.963968	0.952062	0.962735	0.94477	0.000321723	0.0179366
24.0063	227.721	273.033	234.024	244.996	251.287	176.235	235.912	243.29	295.819	186.731	267.304	251.787	234.789	212.73		24.0063	215.721	261.033	222.024	232.996	239.287	164.235	223.912	231.29	283.819	174.731	255.304	239.787	222.789	200.73		24.0063	0.936308	0.903205	0.979575	0.954929	0.915586	0.95395	0.947952	0.943596	0.964664	0.934403	0.946134	0.933682	0.95561	0.964667	0.945304	0.000399911	0.0199978
24.0447	224.969	268.832	237.654	245.816	255.708	174.965	231.098	248.224	295.343	184.765	268.374	253.346	239.704	217.616		24.0447	212.969	256.832	225.654	233.816	243.708	162.965	219.098	236.224	283.343	172.765	256.374	241.346	227.704	205.616		24.0447	0.924363	0.888669	0.995591	0.958289	0.932502	0.946574	0.927571	0.963725	0.963047	0.92389	0.950099	0.939752	0.976692	0.988148	0.948494	0.000820637	0.0286468
24.0705	224.756	272.085	234.68	244.723	254.35	173.694	235.892	239.352	291.295	182.81	268.476	256.784	233.431	213.069		24.0705	212.756	260.085	222.68	232.723	242.35	161.694	223.892	227.352	279.295	170.81	256.476	244.784	221.431	201.069		24.0705	0.923439	0.899925	0.982469	0.95381	0.927306	0.939191	0.947867	0.92753	0.949288	0.913435	0.950477	0.953139	0.949785	0.966296	0.941711	0.000467269	0.0216164
24.1089	224.467	268.568	231.058	243.393	252.437	175.838	232.763	247.251	292.858	186.309	267.023	258.169	230.346	216.285		24.1089	212.467	256.568	219.058	231.393	240.437	163.838	220.763	235.251	280.858	174.309	255.023	246.169	218.346	204.285		24.1089	0.922184	0.887755	0.966489	0.948359	0.919986	0.951644	0.93462	0.959755	0.9546	0.932146	0.945093	0.958532	0.936552	0.981752	0.942819	0.000543218	0.023307
24.131	222.568	274.605	232.368	246.97	249.919	176.282	234.757	244.411	298.024	188.117	271.815	255.394	232.652	215.446		24.131	210.568	262.605	220.368	234.97	237.919	164.282	222.757	232.411	286.024	176.117	259.815	243.394	220.652	203.446		24.131	0.913942	0.908644	0.972269	0.963019	0.910351	0.954223	0.943062	0.948169	0.972159	0.941815	0.962851	0.947726	0.946443	0.97772	0.947314	0.000517352	0.0227454
24.1694	227.331	274.436	233.205	245.98	253.044	175.48	229.919	243.909	293.008	187.202	265.752	249.447	236.775	214.503		24.1694	215.331	262.436	221.205	233.98	241.044	163.48	217.919	231.909	281.008	175.202	253.752	237.447	224.775	202.503		24.1694	0.934615	0.908059	0.975962	0.958962	0.922309	0.949565	0.92258	0.946121	0.95511	0.936922	0.940382	0.92457	0.964128	0.973188	0.943748	0.00041618	0.0204005
24.1952	227.367	271.841	237.251	244.692	250.099	173.739	237.856	232.604	295.869	184.797	267.268	252.996	232.905	215.739		24.1952	215.367	259.841	225.251	232.692	238.099	161.739	225.856	220.604	283.869	172.797	255.268	240.996	220.905	203.739		24.1952	0.934772	0.89908	0.993813	0.953683	0.91104	0.939453	0.956182	0.9	0.964834	0.924061	0.946001	0.938389	0.947529	0.979128	0.941997	0.000763605	0.0276334
24.2337	225.563	279.691	232.713	243.051	251.008	175.941	233.45	237.92	297.592	187.334	265.308	256.355	232.933	217.538		24.2337	213.563	267.691	220.713	231.051	239.008	163.941	221.45	225.92	285.592	175.334	253.308	244.355	220.933	205.538		24.2337	0.926942	0.926242	0.973791	0.946957	0.914518	0.952243	0.937529	0.921687	0.970691	0.937628	0.938737	0.951468	0.947649	0.987774	0.945275	0.000440196	0.0209809
24.2558	221.426	271.907	237.251	242.768	257.671	174.312	236.235	239.3	299.478	189.069	268.35	255.561	234.522	216.574		24.2558	209.426	259.907	225.251	230.768	245.671	162.312	224.235	227.3	287.478	177.069	256.35	243.561	222.522	204.574		24.2558	0.908985	0.899309	0.993813	0.945797	0.940013	0.942781	0.949319	0.927317	0.977101	0.946906	0.95001	0.948377	0.954464	0.983141	0.947667	0.000664963	0.0257869
24.2942	228.073	279.247	233.399	243.512	258.118	170.264	232.463	234.041	292.608	187.996	271.021	257.284	232.104	210.944		24.2942	216.073	267.247	221.399	231.512	246.118	158.264	220.463	222.041	280.608	175.996	259.021	245.284	220.104	198.944		24.2942	0.937836	0.924706	0.976818	0.948847	0.941723	0.919268	0.93335	0.905862	0.953751	0.941168	0.959909	0.955086	0.944093	0.956084	0.94275	0.000330671	0.0181844
24.32	220.635	273.468	234.928	236.975	254.342	176.812	231.588	242.325	296.113	191.431	268.146	253.775	237.871	214.868		24.32	208.635	261.468	222.928	224.975	242.342	164.812	219.588	230.325	284.113	179.431	256.146	241.775	225.871	202.868		24.32	0.905552	0.90471	0.983564	0.922055	0.927275	0.957302	0.929646	0.939659	0.965664	0.959537	0.949254	0.941422	0.968829	0.974942	0.944958	0.000619722	0.0248942
24.3584	229.151	263.884	240.962	248.483	254.506	170.943	233.079	241.593	297.977	186.794	265.96	253.161	239.334	213.097		24.3584	217.151	251.884	228.962	236.483	242.506	158.943	221.079	229.593	285.977	174.794	253.96	241.161	227.334	201.097		24.3584	0.942515	0.871548	1.01019	0.96922	0.927903	0.923212	0.935958	0.936672	0.971999	0.93474	0.941153	0.939032	0.975105	0.966431	0.94612	0.00102984	0.0320911
24.3805	223.267	273.53	232.389	242.967	250.98	170.671	228.548	241.294	295.314	189.523	274.221	263.659	232.316	211.832		24.3805	211.267	261.53	220.389	230.967	238.98	158.671	216.548	229.294	283.314	177.523	262.221	251.659	220.316	199.832		24.3805	0.916976	0.904925	0.972361	0.946613	0.914411	0.921632	0.916776	0.935452	0.962948	0.949334	0.971768	0.979909	0.945002	0.960352	0.942747	0.000611753	0.0247336
24.4189	221.148	273.153	229.794	244.476	251.795	167.941	230.623	241.379	299.921	188.874	274.268	260.81	237.254	213.912		24.4189	209.148	261.153	217.794	232.476	239.795	155.941	218.623	229.379	287.921	176.874	262.268	248.81	225.254	201.912		24.4189	0.907779	0.90362	0.960912	0.952798	0.91753	0.905775	0.925561	0.935799	0.978607	0.945863	0.971942	0.968815	0.966183	0.970348	0.943681	0.000742886	0.0272559
24.4447	221.764	267.174	230.755	244.359	258.216	176.211	233.959	243.555	294.213	189.419	260.841	256.665	238.06	212.556		24.4447	209.764	255.174	218.755	232.359	246.216	164.211	221.959	231.555	282.213	177.419	248.841	244.665	226.06	200.556		24.4447	0.910452	0.882932	0.965152	0.952318	0.942098	0.953811	0.939684	0.944677	0.959206	0.948778	0.922183	0.952676	0.96964	0.963831	0.943388	0.000564696	0.0237633
24.4831	222.355	268.834	229.884	245.292	263.422	174.26	229.448	236.743	296.084	186.004	267.484	257.519	232.683	210.422		24.4831	210.355	256.834	217.884	233.292	251.422	162.26	217.448	224.743	284.084	174.004	255.484	245.519	220.683	198.422		24.4831	0.913018	0.888676	0.961309	0.956142	0.962018	0.942479	0.920586	0.916886	0.965565	0.930515	0.946801	0.956001	0.946576	0.953576	0.940011	0.00051941	0.0227906
24.5053	227.437	269.458	235.447	244.618	257.811	177.433	231.104	241.16	300.148	186.372	271.456	253.921	232.462	212.467		24.5053	215.437	257.458	223.447	232.618	245.811	165.433	219.104	229.16	288.148	174.372	259.456	241.921	220.462	200.467		24.5053	0.935075	0.890835	0.985853	0.953379	0.940549	0.960909	0.927597	0.934906	0.979378	0.932483	0.961521	0.941991	0.945629	0.963403	0.946679	0.000566874	0.0238091
24.5437	224.849	273.68	225.931	245.168	253.633	173.324	237.905	244.33	287.188	189.456	267.792	256.399	230.112	212.828		24.5437	212.849	261.68	213.931	233.168	241.633	161.324	225.905	232.33	275.188	177.456	255.792	244.399	218.112	200.828		24.5437	0.923843	0.905444	0.943869	0.955634	0.924562	0.937042	0.95639	0.947838	0.935329	0.948976	0.947942	0.95164	0.935549	0.965138	0.941371	0.000247546	0.0157336
24.5695	219.811	278.848	231.72	235.456	251.261	176.749	231.34	236.974	304.905	184.516	268.935	251.472	235.041	215.342		24.5695	207.811	266.848	219.72	223.456	239.261	164.749	219.34	224.974	292.905	172.516	256.935	239.472	223.041	203.342		24.5695	0.901976	0.923325	0.96941	0.915829	0.915486	0.956936	0.928596	0.917828	0.995547	0.922558	0.952178	0.932455	0.956691	0.97722	0.940431	0.00076451	0.0276498
24.6079	224.365	271.721	232.073	242.452	248.028	172.315	233.127	239.199	298.474	190.054	267.59	258.197	234.789	216.983		24.6079	212.365	259.721	220.073	230.452	236.028	160.315	221.127	227.199	286.474	178.054	255.59	246.197	222.789	204.983		24.6079	0.921742	0.898665	0.970967	0.944502	0.903116	0.931181	0.936161	0.926905	0.973688	0.952173	0.947194	0.958641	0.95561	0.985106	0.943261	0.000650561	0.0255061
24.63	221.004	271.695	223.601	243.658	253.947	173.736	234.764	248.608	295.689	192.24	279.897	256.822	229.912	216.594		24.63	209.004	259.695	211.601	231.658	241.947	161.736	222.764	236.608	283.689	180.24	267.897	244.822	217.912	204.594		24.63	0.907154	0.898575	0.933589	0.949445	0.925764	0.939435	0.943092	0.965291	0.964223	0.963863	0.992802	0.953287	0.934691	0.983237	0.946746	0.000704514	0.0265427
24.6684	224.147	271.619	226.975	241.656	248.69	171.585	232.66	239.7	296.902	187.496	268.197	257.779	234.245	211.79		24.6684	212.147	259.619	214.975	229.656	236.69	159.585	220.66	227.7	284.902	175.496	256.197	245.779	222.245	199.79		24.6684	0.920796	0.898312	0.948475	0.94124	0.905649	0.926941	0.934184	0.928949	0.968345	0.938494	0.949443	0.957013	0.953276	0.96015	0.937948	0.000414937	0.02037
24.6961	224.85	272.743	228.901	247.041	253.978	171.209	233.558	242.153	298.777	187.414	263.167	258.645	230.531	210.583		24.6961	212.85	260.743	216.901	235.041	241.978	159.209	221.558	230.153	286.777	175.414	251.167	246.645	218.531	198.583		24.6961	0.923847	0.902201	0.956972	0.96331	0.925882	0.924757	0.937986	0.938957	0.974718	0.938056	0.930803	0.960385	0.937346	0.954349	0.940684	0.00037489	0.0193621
24.7345	228.152	269.786	227.508	241.408	251.451	172.925	239.547	237.666	296.63	190.758	269.689	253.968	235.146	206.364		24.7345	216.152	257.786	215.508	229.408	239.451	160.925	227.547	225.666	284.63	178.758	257.689	241.968	223.146	194.364		24.7345	0.938179	0.89197	0.950826	0.940223	0.916213	0.934724	0.963341	0.920651	0.967421	0.955938	0.954973	0.942174	0.957141	0.934074	0.940561	0.000423051	0.0205682
24.7566	220.303	276.64	235.967	244.955	252.48	176.89	233.652	241.175	304.336	187.532	270.087	256.444	228.333	210.484		24.7566	208.303	264.64	223.967	232.955	240.48	164.89	221.652	229.175	292.336	175.532	258.087	244.444	216.333	198.484		24.7566	0.904111	0.915686	0.988148	0.954761	0.920151	0.957755	0.938384	0.934967	0.993613	0.938687	0.956448	0.951815	0.927918	0.953873	0.945451	0.000643159	0.0253606
24.795	222.734	273.391	232.092	243.079	251.855	174.774	231.84	237.138	298.794	189.698	268.479	254.275	237.054	211.652		24.795	210.734	261.391	220.092	231.079	239.855	162.774	219.84	225.138	286.794	177.698	256.479	242.275	225.054	199.652		24.795	0.914663	0.904444	0.971051	0.947072	0.917759	0.945464	0.930713	0.918497	0.974776	0.95027	0.950488	0.943369	0.965325	0.959487	0.942384	0.000490098	0.0221382
24.8208	228.553	271.823	234.308	248.352	254.235	171.387	231.802	244.715	295.253	193.258	265.813	251.593	233.813	211.692		24.8208	216.553	259.823	222.308	236.352	242.235	159.387	219.802	232.715	283.253	181.258	253.813	239.593	221.813	199.692		24.8208	0.939919	0.899018	0.980828	0.968683	0.926866	0.925791	0.930552	0.949409	0.962741	0.969307	0.940608	0.932926	0.951423	0.959679	0.945554	0.000479523	0.021898
24.8592	227.517	272.536	227.373	245.695	256.201	171.744	233.907	243.78	294.253	187.775	269.638	261.446	234.858	213.182		24.8592	215.517	260.536	215.373	233.695	244.201	159.744	221.907	231.78	282.253	175.775	257.638	249.446	222.858	201.182		24.8592	0.935423	0.901485	0.950231	0.957794	0.934388	0.927865	0.939464	0.945595	0.959342	0.939986	0.954784	0.971292	0.955906	0.96684	0.945742	0.000324578	0.0180161
24.8813	230.459	270.972	235.734	239.423	249.946	174.789	239.074	243.974	301.815	187.321	266.378	255.246	234.223	206.941		24.8813	218.459	258.972	223.734	227.423	237.946	162.789	227.074	231.974	289.815	175.321	254.378	243.246	222.223	194.941		24.8813	0.948192	0.896074	0.98712	0.932088	0.910455	0.945551	0.961339	0.946386	0.985044	0.937558	0.942702	0.94715	0.953182	0.936847	0.944978	0.00058535	0.024194
24.9197	229.612	279.506	239.262	244.892	259.894	169.676	232.714	240.864	296.413	189.907	266.297	256.706	235.689	218.348		24.9197	217.612	267.506	227.262	232.892	247.894	157.676	220.714	228.864	284.413	177.907	254.297	244.706	223.689	206.348		24.9197	0.944516	0.925602	1.00269	0.954502	0.948519	0.915853	0.934413	0.933698	0.966683	0.951387	0.942402	0.952835	0.95947	0.991666	0.951731	0.000556009	0.0235798
24.9455	227.255	276.228	229.863	238.983	255.791	177.798	235.327	242.635	295.441	188.03	273.033	254.863	234.674	210.872		24.9455	215.255	264.228	217.863	226.983	243.791	165.798	223.327	230.635	283.441	176.03	261.033	242.863	222.674	198.872		24.9455	0.934285	0.91426	0.961217	0.930285	0.932819	0.963029	0.945475	0.940923	0.96338	0.94135	0.967365	0.945659	0.955116	0.955738	0.946493	0.000235981	0.0153617
24.9839	220.323	279.145	233.417	242.184	256.648	170.953	236.069	243.339	294.186	188.212	276.318	262.451	238.269	213.707		24.9839	208.323	267.145	221.417	230.184	244.648	158.953	224.069	231.339	282.186	176.212	264.318	250.451	226.269	201.707		24.9839	0.904198	0.924353	0.976897	0.943404	0.936099	0.92327	0.948617	0.943795	0.959114	0.942323	0.979539	0.975205	0.970537	0.969363	0.949765	0.000532032	0.0230658
25.0061	221.736	273.117	234.3	237.974	255.719	167.781	236.637	243.824	302.148	188.311	268.06	255.244	240.292	210.072		25.0061	209.736	261.117	222.3	225.974	243.719	155.781	224.637	231.824	290.148	176.311	256.06	243.244	228.292	198.072		25.0061	0.910331	0.903496	0.980793	0.926149	0.932544	0.904846	0.951021	0.945774	0.986176	0.942852	0.948936	0.947142	0.979214	0.951894	0.943655	0.000713717	0.0267155
25.0445	227.861	276.099	232.709	245.126	255.53	171.975	236.948	240.457	302.413	189.446	273.46	263.042	233.697	217.082		25.0445	215.861	264.099	220.709	233.126	243.53	159.975	224.948	228.457	290.413	177.446	261.46	251.042	221.697	205.082		25.0445	0.936916	0.913814	0.973773	0.955462	0.931821	0.929206	0.952338	0.932038	0.987077	0.948922	0.968948	0.977506	0.950926	0.985582	0.953166	0.000521896	0.022845
25.0703	218.762	277.698	233.433	242.552	249.168	174.231	235.185	244.517	296.88	192.245	270.815	259.286	234.112	210.593		25.0703	206.762	265.698	221.433	230.552	237.168	162.231	223.185	232.517	284.88	180.245	258.815	247.286	222.112	198.593		25.0703	0.897423	0.919346	0.976968	0.944912	0.907478	0.94231	0.944874	0.948601	0.968271	0.96389	0.959145	0.962881	0.952706	0.954397	0.945943	0.000532708	0.0230805
25.1087	218.336	275.705	234.906	245.529	252.017	177.578	233.28	244.191	301.755	188.708	268.983	254.998	234.811	210.21		25.1087	206.336	263.705	222.906	233.529	240.017	165.578	221.28	232.191	289.755	176.708	256.983	242.998	222.811	198.21		25.1087	0.895574	0.91245	0.983467	0.957113	0.918379	0.961751	0.936809	0.947271	0.98484	0.944975	0.952356	0.946185	0.955704	0.952557	0.946388	0.00061368	0.0247726
25.1308	225.117	273.349	231.448	244.542	257.403	170.811	235.246	244.598	288.758	189.716	273.564	255.461	239.997	216.108		25.1308	213.117	261.349	219.448	232.542	245.403	158.811	223.246	232.598	276.758	177.716	261.564	243.461	227.997	204.108		25.1308	0.925006	0.904298	0.96821	0.953068	0.938987	0.922445	0.945132	0.948932	0.940665	0.950366	0.969333	0.947987	0.977948	0.980901	0.948091	0.000469987	0.0216792
25.1692	226.67	274.524	234.817	242.412	246.927	176.075	231.681	243.835	298.847	190.658	268.803	259.047	230.02	208.861		25.1692	214.67	262.524	222.817	230.412	234.927	164.075	219.681	231.835	286.847	178.658	256.803	247.047	218.02	196.861		25.1692	0.931746	0.908364	0.983074	0.944338	0.898903	0.953021	0.93004	0.945819	0.974956	0.955403	0.951689	0.961951	0.935154	0.946074	0.944324	0.000523925	0.0228894
25.195	223.433	275.93	232.294	243.655	257.254	176.502	233.567	243.033	296.619	192.755	271.736	244.386	232.067	210.276		25.195	211.433	263.93	220.294	231.655	245.254	164.502	221.567	231.033	284.619	180.755	259.736	232.386	220.067	198.276		25.195	0.917697	0.913229	0.971942	0.949433	0.938417	0.955501	0.938024	0.942547	0.967384	0.966617	0.962559	0.904864	0.943934	0.952874	0.944644	0.000435203	0.0208615
25.2334	221.247	279.79	232.957	247.134	249.784	175.593	226.861	240.645	301.579	187.138	273.984	255.593	230.922	214.427		25.2334	209.247	267.79	220.957	235.134	237.784	163.593	214.861	228.645	289.579	175.138	261.984	243.593	218.922	202.427		25.2334	0.908209	0.926585	0.974867	0.963691	0.909835	0.950221	0.909634	0.932805	0.984242	0.93658	0.970889	0.948501	0.939023	0.972823	0.94485	0.00066926	0.0258701
25.2555	221.007	271.314	229.313	236.512	256.255	173.531	236.434	245.014	294.447	190.437	263.94	250.702	232.23	206.906		25.2555	209.007	259.314	217.313	224.512	244.255	161.531	224.434	233.014	282.447	178.437	251.94	238.702	220.23	194.906		25.2555	0.907167	0.897257	0.95879	0.920157	0.934595	0.938244	0.950162	0.950629	0.960001	0.954222	0.933667	0.929457	0.944633	0.936678	0.936833	0.000349689	0.0187
25.294	223.37	271.155	232.636	243.752	253.649	170.727	236.438	241.107	301.392	190.861	265.584	253.883	238.922	210.622		25.294	211.37	259.155	220.636	231.752	241.649	158.727	224.438	229.107	289.392	178.861	253.584	241.883	226.922	198.622		25.294	0.917423	0.896707	0.973451	0.94983	0.924624	0.921958	0.950179	0.93469	0.983606	0.956489	0.93976	0.941843	0.973337	0.954537	0.944174	0.000580699	0.0240977
25.3198	225.87	273.418	231.054	247.359	254.88	170.745	235.727	235.817	304.619	191.72	269.214	252.506	240.537	215.896		25.3198	213.87	261.418	219.054	235.359	242.88	158.745	223.727	223.817	292.619	179.72	257.214	240.506	228.537	203.896		25.3198	0.928274	0.904537	0.966471	0.964613	0.929334	0.922062	0.947169	0.913108	0.994575	0.961083	0.953212	0.936481	0.980265	0.979882	0.948648	0.000745117	0.0272968
25.3582	225.57	275.686	231.886	240.413	252.41	172.445	233.161	241.489	292.017	187.13	263.89	255.155	238.509	212.648		25.3582	213.57	263.686	219.886	228.413	240.41	160.445	221.161	229.489	280.017	175.13	251.89	243.155	226.509	200.648		25.3582	0.926972	0.912385	0.970142	0.936145	0.919883	0.931936	0.936305	0.936248	0.951742	0.936537	0.933482	0.946796	0.971566	0.964273	0.941029	0.000320193	0.0178939
25.3803	220.458	273.312	236.58	245.039	250.945	177.985	235.001	244.476	305.069	192.931	264.872	255.996	233.206	215.928		25.3803	208.458	261.312	224.58	233.039	238.945	165.985	223.001	232.476	293.069	180.931	252.872	243.996	221.206	203.928		25.3803	0.904784	0.90417	0.990852	0.955105	0.914277	0.964115	0.944095	0.948434	0.996104	0.967559	0.937121	0.950071	0.94882	0.980036	0.950396	0.000834895	0.0288945
25.4187	225.782	266.312	230.932	239.675	255.126	178.662	233.008	240.596	291.821	192.337	273.958	262.964	234.175	208.654		25.4187	213.782	254.312	218.932	227.675	243.126	166.662	221.008	228.596	279.821	180.337	261.958	250.964	222.175	196.654		25.4187	0.927892	0.879949	0.965933	0.933121	0.930275	0.968048	0.935658	0.932605	0.951076	0.964382	0.970793	0.977203	0.952976	0.945079	0.945356	0.000636094	0.0252209
25.4445	229.218	268.736	233.334	243.119	251.021	174.86	230.114	242.581	293.933	191.025	275.902	256.296	237.456	206.544		25.4445	217.218	256.736	221.334	231.119	239.021	162.86	218.114	230.581	281.933	179.025	263.902	244.296	225.456	194.544		25.4445	0.942806	0.888337	0.976531	0.947236	0.914568	0.945964	0.923406	0.940703	0.958254	0.957366	0.977997	0.951239	0.967049	0.934939	0.944742	0.000589951	0.0242889
25.4829	216.071	277.553	230.83	239.479	254.94	178.812	235.11	237.593	293.192	192.319	272.027	265.135	238.382	206.734		25.4829	204.071	265.553	218.83	227.479	242.94	166.812	223.11	225.593	281.192	180.319	260.027	253.135	226.382	194.734		25.4829	0.885743	0.918845	0.965483	0.932317	0.929563	0.968919	0.944557	0.920353	0.955736	0.964286	0.963637	0.985656	0.971021	0.935852	0.945855	0.000725537	0.0269358
25.505	222.7	270.662	229.033	244.524	252.99	172.267	234.665	245.977	300.78	188.313	272.513	260.7	238.293	214.268		25.505	210.7	258.662	217.033	232.524	240.99	160.267	222.665	233.977	288.78	176.313	260.513	248.7	226.293	202.268		25.505	0.914515	0.895001	0.957555	0.952994	0.922102	0.930903	0.942673	0.954558	0.981526	0.942863	0.965438	0.968387	0.970639	0.972059	0.947944	0.000618632	0.0248723
25.5434	219.918	272.211	230.772	240.797	252.875	178.791	233.307	244.92	292.556	192.187	270.188	262.641	234.668	215.851		25.5434	207.918	260.211	218.772	228.797	240.875	166.791	221.307	232.92	280.556	180.187	258.188	250.641	222.668	203.851		25.5434	0.90244	0.900361	0.965227	0.937719	0.921662	0.968797	0.936923	0.950245	0.953574	0.96358	0.956822	0.975945	0.955091	0.979666	0.947718	0.000629697	0.0250938
25.5711	222.002	270.069	231.393	240.619	254.879	176.596	233.5	242.204	289.996	193.019	270.857	257.473	232.867	213.063		25.5711	210.002	258.069	219.393	228.619	242.879	164.596	221.5	230.204	277.996	181.019	258.857	245.473	220.867	201.063		25.5711	0.911485	0.892949	0.967967	0.93699	0.92933	0.956047	0.937741	0.939165	0.944873	0.968029	0.959301	0.955822	0.947366	0.966268	0.943809	0.000474505	0.0217831
25.6095	218.065	265.562	236.348	240.582	253.649	180.424	237.533	236.629	297.617	189.373	271.364	259.149	232.921	207.498		25.6095	206.065	253.562	224.348	228.582	241.649	168.424	225.533	224.629	285.617	177.373	259.364	247.149	220.921	195.498		25.6095	0.894397	0.877354	0.989829	0.936838	0.924624	0.978282	0.954815	0.916421	0.970776	0.948532	0.96118	0.962348	0.947597	0.939523	0.943037	0.000990089	0.0314657
25.6316	223.572	278.866	233.687	241.712	257.659	175.614	233.371	237.51	302.613	191.584	266.894	251.403	237.13	216.426		25.6316	211.572	266.866	221.687	229.712	245.659	163.614	221.371	225.51	290.613	179.584	254.894	239.403	225.13	204.426		25.6316	0.9183	0.923388	0.978088	0.941469	0.939967	0.950343	0.937194	0.920015	0.987756	0.960355	0.944615	0.932186	0.965651	0.98243	0.948697	0.000530052	0.0230229
25.67	225.115	280.908	233.238	246.506	255.882	176.339	233.284	237.02	304.922	194.288	270.78	256.753	227.7	212.66		25.67	213.115	268.908	221.238	234.506	243.882	164.339	221.284	225.02	292.922	182.288	258.78	244.753	215.7	200.66		25.67	0.924997	0.930453	0.976107	0.961117	0.933168	0.954555	0.936826	0.918016	0.995604	0.974815	0.959016	0.953018	0.925203	0.964331	0.950516	0.000531963	0.0230643
25.6958	218.548	272.025	235.043	242.48	251.689	172.994	234.464	239.798	300.56	188.505	269.735	254.544	235.422	211.264		25.6958	206.548	260.025	223.043	230.48	239.689	160.994	222.464	227.798	288.56	176.505	257.735	242.544	223.422	199.264		25.6958	0.896494	0.899717	0.984071	0.944617	0.917124	0.935125	0.941822	0.929349	0.980778	0.94389	0.955143	0.944417	0.958325	0.957622	0.942035	0.000666006	0.0258071
25.7342	222.284	278.122	234.818	242.279	253.084	178.242	232.287	244.04	296.331	188.94	269.058	251.851	238.195	213.104		25.7342	210.284	266.122	222.818	230.279	241.084	166.242	220.287	232.04	284.331	176.94	257.058	239.851	226.195	201.104		25.7342	0.912709	0.920813	0.983078	0.943793	0.922462	0.965608	0.932605	0.946655	0.966405	0.946216	0.952634	0.933931	0.970219	0.966465	0.9474	0.000448053	0.0211673
25.7564	219.223	275.895	229.363	242.421	254.706	175.344	231.717	239.397	295.152	190.898	269.764	261.578	241.805	216.127		25.7564	207.223	263.895	217.363	230.421	242.706	163.344	219.717	227.397	283.152	178.898	257.764	249.578	229.805	204.127		25.7564	0.899424	0.913108	0.959011	0.944375	0.928668	0.948775	0.930192	0.927713	0.962397	0.956687	0.95525	0.971806	0.985703	0.980993	0.947436	0.000632473	0.025149
25.7948	222.446	274.196	233.357	238.489	250.273	173.95	229.642	234.549	296.184	190.285	266.238	257.994	233.933	211.375		25.7948	210.446	262.196	221.357	226.489	238.273	161.95	217.642	222.549	284.184	178.285	254.238	245.994	221.933	199.375		25.7948	0.913413	0.907229	0.976632	0.92826	0.911706	0.940678	0.921407	0.907935	0.965905	0.953409	0.942183	0.95785	0.951938	0.958155	0.938336	0.000541776	0.0232761
25.8206	225.709	275.663	234.727	245.024	256.741	177.192	233.968	240.719	304.153	192.065	264.055	262.423	234.726	210.34		25.8206	213.709	263.663	222.727	233.024	244.741	165.192	221.968	228.719	292.153	180.065	252.055	250.423	222.726	198.34		25.8206	0.927575	0.912305	0.982677	0.955043	0.936454	0.959509	0.939722	0.933107	0.992991	0.962928	0.934093	0.975096	0.95534	0.953181	0.95143	0.000506928	0.0225151
25.859	219.748	273.636	240.456	242.329	257.731	178.803	233.938	237.423	293.612	188.674	269.081	261.876	230.857	206.724		25.859	207.748	261.636	228.456	230.329	245.731	166.803	221.938	225.423	281.612	176.674	257.081	249.876	218.857	194.724		25.859	0.901702	0.905291	1.00795	0.943998	0.940243	0.968867	0.939595	0.91966	0.957163	0.944794	0.952719	0.972966	0.938744	0.935804	0.944964	0.000753272	0.0274458
25.8811	216.611	270.477	233.828	243.207	255.249	172.086	225.225	238.066	297.532	187.151	266.334	254.806	236.312	217.099		25.8811	204.611	258.477	221.828	231.207	243.249	160.086	213.225	226.066	285.532	175.151	254.334	242.806	224.312	205.099		25.8811	0.888087	0.894361	0.97871	0.947597	0.930746	0.929851	0.902708	0.922283	0.970487	0.936649	0.942539	0.945437	0.962142	0.985664	0.938376	0.000903277	0.0300546
25.9195	221.716	270.993	229.484	241.474	256.269	177.801	229.336	243.273	300.29	193.078	265.619	255.192	229.562	211.547		25.9195	209.716	258.993	217.484	229.474	244.269	165.801	217.336	231.273	288.29	181.078	253.619	243.192	217.562	199.547		25.9195	0.910244	0.896146	0.959545	0.940494	0.934648	0.963046	0.920112	0.943526	0.979861	0.968345	0.939889	0.94694	0.93319	0.958982	0.942498	0.000532184	0.0230691
25.9453	218.546	272.653	232.538	237.228	254.634	171.101	232.274	244.462	295.721	185.91	265.767	255.607	233.881	215.576		25.9453	206.546	260.653	220.538	225.228	242.634	159.101	220.274	232.462	283.721	173.91	253.767	243.607	221.881	203.576		25.9453	0.896485	0.90189	0.973019	0.923092	0.928392	0.92413	0.93255	0.948377	0.964331	0.930013	0.940438	0.948556	0.951715	0.978345	0.938667	0.000583241	0.0241504
25.9837	224.505	270.382	233.053	244.633	257.068	172.169	230.812	242.846	296.187	191.823	265.993	256.222	231.221	208.548		25.9837	212.505	258.382	221.053	232.633	245.068	160.169	218.812	230.846	284.187	179.823	253.993	244.222	219.221	196.548		25.9837	0.922349	0.894032	0.975291	0.953441	0.937706	0.930333	0.926361	0.941784	0.965915	0.961633	0.941276	0.950951	0.940305	0.944569	0.941853	0.000413282	0.0203293
26.0058	223.51	278.78	229.972	247.081	261.909	169.865	238.255	240.69	303.383	191.351	266.922	255.369	234.613	214.763		26.0058	211.51	266.78	217.972	235.081	249.909	157.865	226.255	228.69	291.383	179.351	254.922	243.369	222.613	202.763		26.0058	0.918031	0.92309	0.961698	0.963474	0.956229	0.916951	0.957871	0.932988	0.990374	0.959109	0.944718	0.947629	0.954855	0.974437	0.950104	0.00045493	0.0213291
26.0442	222.23	268.468	232.887	248.25	259.499	175.845	230.905	241.53	298.358	190.706	265.952	254.312	227.549	210.152		26.0442	210.23	256.468	220.887	236.25	247.499	163.845	218.905	229.53	286.358	178.706	253.952	242.312	215.549	198.152		26.0442	0.912475	0.887409	0.974559	0.968265	0.947007	0.951685	0.926754	0.936415	0.973294	0.95566	0.941124	0.943513	0.924555	0.952278	0.9425	0.000581517	0.0241147
26.0701	218.073	278.512	231.903	243.704	256.239	175.801	237.995	240.683	297.46	188.704	265.162	257	233.722	211.478		26.0701	206.073	266.512	219.903	231.704	244.239	163.801	225.995	228.683	285.46	176.704	253.162	245	221.722	199.478		26.0701	0.894432	0.922163	0.970217	0.949633	0.934534	0.95143	0.956771	0.93296	0.970242	0.944954	0.938196	0.95398	0.951033	0.95865	0.944942	0.000396707	0.0199175
26.1085	218.804	268.536	233.097	241.799	252.074	170.313	237.457	240.955	304.726	191.367	271.519	254.397	232.75	204.573		26.1085	206.804	256.536	221.097	229.799	240.074	158.313	225.457	228.955	292.726	179.367	259.519	242.397	220.75	192.573		26.1085	0.897605	0.887645	0.975485	0.941826	0.918597	0.919553	0.954493	0.934069	0.994938	0.959195	0.961754	0.943844	0.946864	0.925466	0.940095	0.000850401	0.0291616
26.1306	222.005	280.745	228.021	244.196	252.917	175.151	232.09	242.432	297.265	186.772	268.882	248.081	234.758	209.827		26.1306	210.005	268.745	216.021	232.196	240.917	163.151	220.09	230.432	285.265	174.772	256.882	236.081	222.758	197.827		26.1306	0.911499	0.929889	0.95309	0.95165	0.921823	0.947654	0.931771	0.940095	0.969579	0.934622	0.951982	0.919251	0.955477	0.950716	0.94065	0.000269594	0.0164193
26.169	218.857	277.115	225.616	240.472	254.34	177.5	240.442	240.128	304.442	187.017	270.397	259.439	229.281	212.422		26.169	206.857	265.115	213.616	228.472	242.34	165.5	228.442	228.128	292.442	175.017	258.397	247.439	217.281	200.422		26.169	0.897835	0.917329	0.942479	0.936387	0.927268	0.961298	0.96713	0.930695	0.993973	0.935933	0.957596	0.963477	0.931984	0.963187	0.944755	0.000601935	0.0245344
26.1948	221.204	278.999	227.793	243.835	258.694	173.683	234.125	245.889	301.531	187.111	268.445	251.912	235.468	213.456		26.1948	209.204	266.999	215.793	231.835	246.694	161.683	222.125	233.889	289.531	175.111	256.445	239.912	223.468	201.456		26.1948	0.908022	0.923848	0.952084	0.95017	0.943927	0.939127	0.940387	0.954199	0.984079	0.936435	0.950362	0.934168	0.958522	0.968156	0.945963	0.00034507	0.018576
26.2332	222.493	275.336	230.992	241.465	254.304	174.78	232.504	237.54	300.476	185.783	264.327	253.809	237.88	212.684		26.2332	210.493	263.336	218.992	229.465	242.304	162.78	220.504	225.54	288.476	173.783	252.327	241.809	225.88	200.684		26.2332	0.913617	0.911174	0.966198	0.940457	0.92713	0.945499	0.933524	0.920137	0.980493	0.929334	0.935101	0.941555	0.968868	0.964446	0.941252	0.000464218	0.0215457
26.2553	226.768	271.374	234.597	241.715	252.381	172.469	232.47	239.031	301.389	191.667	274.268	257.714	237.378	209.302		26.2553	214.768	259.374	222.597	229.715	240.381	160.469	220.47	227.031	289.389	179.667	262.268	245.714	225.378	197.302		26.2553	0.932172	0.897465	0.982103	0.941482	0.919772	0.932076	0.93338	0.92622	0.983596	0.960799	0.971942	0.95676	0.966715	0.948193	0.94662	0.000627144	0.0250428
26.2937	214.996	270.256	230.86	243.785	257.761	172.253	232.61	241.201	299.622	184.024	270.495	259.075	235.257	208.268		26.2937	202.996	258.256	218.86	231.785	245.761	160.253	220.61	229.201	287.622	172.024	258.495	247.075	223.257	196.268		26.2937	0.881077	0.893596	0.965615	0.949965	0.940357	0.930821	0.933973	0.935073	0.97759	0.919927	0.95796	0.96206	0.957617	0.943224	0.939204	0.000727901	0.0269796
26.3195	221.058	269.884	229.003	244.931	254.379	172.174	231.108	240.571	294.029	190.017	268.456	260.009	232.077	212.403		26.3195	209.058	257.884	217.003	232.931	242.379	160.174	219.108	228.571	282.029	178.017	256.456	248.009	220.077	200.403		26.3195	0.907388	0.892309	0.957422	0.954662	0.927417	0.930362	0.927614	0.932503	0.95858	0.951976	0.950403	0.965696	0.943977	0.963096	0.940243	0.000470994	0.0217024
26.3579	220.772	281.02	224.036	240.558	255.105	171.286	234.22	240.046	302.631	186.108	265.409	252.565	232.987	212.669		26.3579	208.772	269.02	212.036	228.558	243.105	159.286	222.22	228.046	290.631	174.108	253.409	240.565	220.987	200.669		26.3579	0.906147	0.930841	0.935508	0.93674	0.930195	0.925204	0.940789	0.930361	0.987818	0.931072	0.939111	0.936711	0.94788	0.964374	0.938768	0.000360163	0.0189779
26.3801	218.627	275.8	231.4	237.781	252.296	175.868	235.586	237.464	293.796	191.057	270.746	256.825	236.247	214.09		26.3801	206.627	263.8	219.4	225.781	240.296	163.868	223.586	225.464	281.796	179.057	258.746	244.825	224.247	202.09		26.3801	0.896837	0.912779	0.967998	0.925358	0.919447	0.951819	0.946572	0.919827	0.957789	0.957537	0.95889	0.953299	0.961864	0.971203	0.942944	0.000546349	0.0233741
26.4185	220.757	280.343	228.063	240.576	256.019	175.123	233.886	243.08	294.473	185.609	270.198	254.832	235.796	209.425		26.4185	208.757	268.343	216.063	228.576	244.019	163.123	221.886	231.08	282.473	173.609	258.198	242.832	223.796	197.425		26.4185	0.906082	0.928498	0.953275	0.936813	0.933692	0.947491	0.939375	0.942739	0.96009	0.928403	0.956859	0.945538	0.959929	0.948784	0.941969	0.000218918	0.0147959
26.4461	219.065	276.606	232.81	246.073	257.467	175.656	233.538	239.549	297.035	185.806	267.784	262.542	233.868	211.945		26.4461	207.065	264.606	220.81	234.073	245.467	163.656	221.538	227.549	285.035	173.806	255.784	250.542	221.868	199.945		26.4461	0.898738	0.915568	0.974219	0.959343	0.939232	0.950587	0.937901	0.928333	0.968797	0.929457	0.947913	0.975559	0.951659	0.960895	0.945586	0.000500078	0.0223624
26.4845	218.983	276.255	235.418	238.328	251.674	172.704	232.675	239.819	302.756	187.225	265.292	253.718	235.098	207.938		26.4845	206.983	264.255	223.418	226.328	239.674	160.704	220.675	227.819	290.756	175.225	253.292	241.718	223.098	195.938		26.4845	0.898382	0.914353	0.985725	0.9276	0.917067	0.933441	0.934248	0.929435	0.988242	0.937045	0.938678	0.9412	0.956935	0.941638	0.938856	0.000612192	0.0247425
26.5066	222.157	274.463	234.144	243.833	252.789	180.229	236.416	241.647	298.221	184.252	278.193	255.874	236.642	210.603		26.5066	210.157	262.463	222.144	231.833	240.789	168.229	224.416	229.647	286.221	172.252	266.193	243.874	224.642	198.603		26.5066	0.912158	0.908153	0.980105	0.950162	0.921333	0.977149	0.950086	0.936893	0.972829	0.921146	0.986488	0.949596	0.963558	0.954445	0.948864	0.000668531	0.025856
26.5451	216.743	269.122	233.44	243.333	251.61	174.286	237.666	237.303	300.34	190.053	271.267	259.145	232.759	207.723		26.5451	204.743	257.122	221.44	231.333	239.61	162.286	225.666	225.303	288.34	178.053	259.267	247.145	220.759	195.723		26.5451	0.88866	0.889672	0.976998	0.948113	0.916822	0.94263	0.955378	0.91917	0.980031	0.952168	0.96082	0.962332	0.946902	0.940605	0.94145	0.000809172	0.0284459
26.5709	221.229	275.564	227.202	249.102	250.956	175.781	234.253	241.096	297.814	182.229	270.867	252.55	235.615	213.068		26.5709	209.229	263.564	215.202	237.102	238.956	163.781	222.253	229.096	285.814	170.229	258.867	240.55	223.615	201.068		26.5709	0.90813	0.911962	0.949476	0.971757	0.914319	0.951313	0.940928	0.934645	0.971445	0.910328	0.959338	0.936653	0.959153	0.966292	0.941839	0.000537098	0.0231754
26.6093	223.028	271.451	229.359	243.687	248.947	176.611	228.449	242.494	299.016	184.769	267.501	260.615	238.726	211.56		26.6093	211.028	259.451	217.359	231.687	236.947	164.611	216.449	230.494	287.016	172.769	255.501	248.615	226.726	199.56		26.6093	0.915939	0.897731	0.958993	0.949564	0.906632	0.956134	0.916357	0.940348	0.975531	0.923911	0.946864	0.968056	0.972497	0.959045	0.941971	0.000651579	0.025526
26.6314	218.784	277.267	233.121	241.766	254.723	175.631	234.449	234.333	296.949	188.234	272.253	257.94	237.548	216.484		26.6314	206.784	265.267	221.121	229.766	242.723	163.631	222.449	222.333	284.949	176.234	260.253	245.94	225.548	204.484		26.6314	0.897518	0.917855	0.975591	0.941691	0.928733	0.950442	0.941758	0.907054	0.968505	0.942441	0.964475	0.95764	0.967444	0.982708	0.94599	0.000668678	0.0258588
26.6698	220.247	278.649	232.16	240.799	256.301	174.635	232.996	235.521	293.38	190.853	266.011	257.174	238.327	211.348		26.6698	208.247	266.649	220.16	228.799	244.301	162.635	220.996	223.521	281.38	178.853	254.011	245.174	226.327	199.348		26.6698	0.903868	0.922637	0.971351	0.937727	0.934771	0.944657	0.935607	0.9119	0.956375	0.956446	0.941342	0.954657	0.970785	0.958026	0.942868	0.000412749	0.0203162
26.6956	220.291	271.824	230.361	240.361	251.088	173.033	232.834	237.567	300.901	184.38	267.22	254.063	239.05	216.73		26.6956	208.291	259.824	218.361	228.361	239.088	161.033	220.834	225.567	288.901	172.38	255.22	242.063	227.05	204.73		26.6956	0.904059	0.899022	0.963414	0.935932	0.914824	0.935352	0.934921	0.920247	0.981938	0.921831	0.945823	0.942544	0.973886	0.98389	0.939835	0.000754665	0.0274712
26.734	217.126	272.067	231.954	245.479	253.458	176.433	232.615	237.112	308.057	190.298	272.801	254.824	232.703	211.151		26.734	205.126	260.067	219.954	233.479	241.458	164.433	220.615	225.112	296.057	178.298	260.801	242.824	220.703	199.151		26.734	0.890322	0.899862	0.970442	0.956908	0.923893	0.955101	0.933994	0.918391	1.00626	0.953478	0.966505	0.945507	0.946662	0.957079	0.9446	0.000894364	0.0299059
26.7561	218.588	277.247	232.3	239.107	257.567	175.897	234.504	242.257	305.111	190.796	271.401	256.83	236.548	214.477		26.7561	206.588	265.247	220.3	227.107	245.567	163.897	222.504	230.257	293.111	178.796	259.401	244.83	224.548	202.477		26.7561	0.896667	0.917786	0.971969	0.930793	0.939615	0.951987	0.941991	0.939381	0.996247	0.956141	0.961317	0.953318	0.963155	0.973063	0.949531	0.000618445	0.0248686
26.7945	218.433	276.04	229.431	245.348	254.348	171.429	232.178	244.027	297.057	188.434	270.759	254.19	229.189	214.925		26.7945	206.433	264.04	217.431	233.348	242.348	159.429	220.178	232.027	285.057	176.434	258.759	242.19	217.189	202.925		26.7945	0.895995	0.913609	0.959311	0.956371	0.927298	0.926035	0.932144	0.946602	0.968872	0.94351	0.958938	0.943038	0.93159	0.975216	0.941324	0.000479669	0.0219014
26.8203	215.503	279.48	234.35	241.961	256.916	168.556	235.696	240.366	302.982	193.575	275.017	262.01	234.834	214.111		26.8203	203.503	267.48	222.35	229.961	244.916	156.556	223.696	228.366	290.982	181.575	263.017	250.01	222.834	202.111		26.8203	0.883277	0.925512	0.981013	0.94249	0.937124	0.909347	0.947038	0.931666	0.989011	0.971003	0.974718	0.973488	0.955803	0.971304	0.949485	0.000910962	0.0301821
26.8588	217.095	274.657	232.146	241.48	256.529	171.355	229.465	240.665	303.051	185.631	266.28	258.533	234.487	219.517		26.8588	205.095	262.657	220.146	229.48	244.529	159.355	217.465	228.665	291.051	173.631	254.28	246.533	222.487	207.517		26.8588	0.890187	0.908824	0.971289	0.940518	0.935643	0.925605	0.920658	0.932886	0.989245	0.928521	0.942339	0.959949	0.954314	0.997284	0.942662	0.000879302	0.029653
26.8809	218.689	271.293	232.117	245.927	256.609	175.74	230.75	243.673	303.303	187.484	269.771	260.611	231.415	211.989		26.8809	206.689	259.293	220.117	233.927	244.609	163.74	218.75	231.673	291.303	175.484	257.771	248.611	219.415	199.989		26.8809	0.897106	0.897184	0.971161	0.958744	0.935949	0.951075	0.926098	0.945158	0.990102	0.93843	0.955276	0.96804	0.941138	0.961106	0.945469	0.000685745	0.0261867
26.9193	219.321	273.379	231.341	242.501	250.055	171.021	233.524	242.583	303.207	186.63	265.442	255.215	235.364	216.896		26.9193	207.321	261.379	219.341	230.501	238.055	159.021	221.524	230.583	291.207	174.63	253.442	243.215	223.364	204.896		26.9193	0.899849	0.904402	0.967738	0.944703	0.910872	0.923665	0.937842	0.940711	0.989775	0.933863	0.939234	0.94703	0.958076	0.984688	0.941603	0.000741869	0.0272373
26.9451	220.184	275.754	226.909	240.351	254.378	171.993	235.447	243.756	302.616	192.321	274.36	259.587	234.938	214.772		26.9451	208.184	263.754	214.909	228.351	242.378	159.993	223.447	231.756	290.616	180.321	262.36	247.587	222.938	202.772		26.9451	0.903595	0.91262	0.948184	0.935891	0.927413	0.929311	0.945983	0.945497	0.987767	0.964297	0.972283	0.964053	0.956249	0.974481	0.947687	0.000585839	0.0242041
26.9835	217.423	277.916	232.797	240.656	252.673	180.356	233.466	245.527	299.929	190.625	262.736	251.817	235.505	215.769		26.9835	205.423	265.916	220.797	228.656	240.673	168.356	221.466	233.527	287.929	178.625	250.736	239.817	223.505	203.769		26.9835	0.891611	0.920101	0.974162	0.937141	0.920889	0.977887	0.937597	0.952722	0.978634	0.955227	0.929205	0.933798	0.958681	0.979272	0.946209	0.000700916	0.0264748
27.0056	220.392	273.677	229.388	240.519	248.742	172.086	232.45	242.32	308.801	190.483	272.665	261.097	240.163	208.159		27.0056	208.392	261.677	217.388	228.519	236.742	160.086	220.45	230.32	296.801	178.483	260.665	249.097	228.163	196.159		27.0056	0.904498	0.905433	0.959121	0.93658	0.905848	0.929851	0.933295	0.939638	1.00879	0.954468	0.966001	0.969933	0.97866	0.9427	0.945344	0.0009048	0.0300799
27.044	224.391	277.178	235.949	239.003	250.653	169.268	233.604	244.175	302.699	191.35	276.708	254.539	234.34	213.964		27.044	212.391	265.178	223.949	227.003	238.653	157.268	221.604	232.175	290.699	179.35	264.708	242.539	222.34	201.964		27.044	0.921855	0.917547	0.988068	0.930367	0.91316	0.913483	0.938181	0.947206	0.988049	0.959104	0.980984	0.944397	0.953684	0.970598	0.94762	0.000722981	0.0268883
27.0698	222.349	267.951	232.368	239.979	249.879	170.618	233.537	246.23	301.213	189.42	268.389	258.93	234.992	211.975		27.0698	210.349	255.951	220.368	227.979	237.879	158.618	221.537	234.23	289.213	177.42	256.389	246.93	222.992	199.975		27.0698	0.912992	0.885621	0.972269	0.934367	0.910198	0.921324	0.937897	0.95559	0.982998	0.948783	0.950155	0.961495	0.95648	0.961039	0.942229	0.000721521	0.0268611
27.1082	223.101	268.311	236.376	244.423	253.185	171.91	233.735	239.718	300.43	189.036	269.16	262.268	235.142	212.097		27.1082	211.101	256.311	224.376	232.423	241.185	159.91	221.735	227.718	288.43	177.036	257.16	250.268	223.142	200.097		27.1082	0.916256	0.886866	0.989952	0.95258	0.922848	0.928829	0.938735	0.929023	0.980337	0.946729	0.953012	0.974492	0.957124	0.961625	0.945601	0.000764205	0.0276443
27.1304	213.942	274.73	232.593	241.425	253.738	172.725	236.401	239.235	300.791	189.28	264.667	254.583	234.061	214.293		27.1304	201.942	262.73	220.593	229.425	241.738	160.725	224.401	227.235	288.791	177.28	252.667	242.583	222.061	202.293		27.1304	0.876502	0.909077	0.973262	0.940293	0.924964	0.933563	0.950022	0.927052	0.981564	0.948034	0.936361	0.944569	0.952487	0.972179	0.940709	0.0007416	0.0272323
27.1688	220.253	266.716	235.694	240.831	253.827	173.226	235.934	243.227	303.721	189.556	263.984	261.962	235.42	212.618		27.1688	208.253	254.716	223.694	228.831	241.827	161.226	223.934	231.227	291.721	177.556	251.984	249.962	223.42	200.618		27.1688	0.903894	0.881347	0.986943	0.937859	0.925305	0.936473	0.948045	0.943338	0.991522	0.94951	0.93383	0.973301	0.958316	0.964129	0.945272	0.000898217	0.0299703
27.1946	221.296	269.205	230.328	243.022	253.742	174.172	231.286	244.238	294.004	184.48	263.444	259.107	233.194	213.45		27.1946	209.296	257.205	218.328	231.022	241.742	162.172	219.286	232.238	282.004	172.48	251.444	247.107	221.194	201.45		27.1946	0.908421	0.88996	0.963268	0.946838	0.924979	0.941968	0.928367	0.947463	0.958495	0.922366	0.931829	0.962184	0.948768	0.968127	0.938788	0.000505338	0.0224797
27.233	220.038	276.564	228.241	241.093	251.176	174.856	235.263	242.343	299.85	183.899	267.603	265.716	234.563	211.687		27.233	208.038	264.564	216.241	229.093	239.176	162.856	223.263	230.343	287.85	171.899	255.603	253.716	222.563	199.687		27.233	0.902961	0.915423	0.95406	0.938932	0.915161	0.945941	0.945204	0.939732	0.978365	0.919259	0.947242	0.987918	0.95464	0.959655	0.943178	0.000581858	0.0241217
27.2551	223.55	269.229	230.433	239.828	253.926	176.988	233.957	239.089	297.048	192.426	268.712	256.684	235.647	215.819		27.2551	211.55	257.229	218.433	227.828	241.926	164.988	221.957	227.089	285.048	180.426	256.712	244.684	223.647	203.819		27.2551	0.918204	0.890043	0.963732	0.933748	0.925683	0.958324	0.939675	0.926457	0.968842	0.964858	0.951352	0.952749	0.95929	0.979512	0.945176	0.000584363	0.0241736
27.2935	211.335	271.936	234.393	238.129	252.626	173.854	232.375	238.215	299.555	186.142	269.037	260.243	237.417	206.474		27.2935	199.335	259.936	222.393	226.129	240.626	161.854	220.375	226.215	287.555	174.142	257.037	248.243	225.417	194.474		27.2935	0.865187	0.899409	0.981203	0.926784	0.920709	0.940121	0.932978	0.922891	0.977363	0.931253	0.952556	0.966608	0.966882	0.934602	0.937039	0.000984484	0.0313765
27.3212	223.842	277.016	237.239	235.97	253.418	174.844	234.355	242.499	303.19	189.266	266.262	252.027	235.645	214.23		27.3212	211.842	265.016	225.239	223.97	241.418	162.844	222.355	230.499	291.19	177.266	254.262	240.027	223.645	202.23		27.3212	0.919472	0.916987	0.99376	0.917936	0.92374	0.945871	0.94136	0.940368	0.989718	0.947959	0.942272	0.934616	0.959281	0.971876	0.946087	0.000620562	0.0249111
27.3596	223.961	273.666	234.3	236.872	253.319	176.502	230.711	239.842	305.191	191.263	267.726	252.421	232.736	212.707		27.3596	211.961	261.666	222.3	224.872	241.319	164.502	218.711	227.842	293.191	179.263	255.726	240.421	220.736	200.707		27.3596	0.919988	0.905395	0.980793	0.921633	0.923361	0.955501	0.925933	0.929529	0.996519	0.958639	0.947698	0.93615	0.946804	0.964557	0.94375	0.000653258	0.0255589
27.3817	220.272	271.361	236.007	237.73	249.829	172.462	231.146	244.305	296.969	184.978	267.919	260.412	240.438	212.93		27.3817	208.272	259.361	224.007	225.73	237.829	160.462	219.146	232.305	284.969	172.978	255.919	248.412	228.438	200.93		27.3817	0.903977	0.89742	0.988324	0.925149	0.910007	0.932035	0.927775	0.947736	0.968573	0.925029	0.948413	0.967266	0.97984	0.965628	0.941941	0.000837303	0.0289362
27.4201	222.521	268.603	229.568	238.692	252.198	177.763	232.902	236.24	300.639	187.557	262.443	256.656	234.318	209.25		27.4201	210.521	256.603	217.568	226.692	240.198	165.763	220.902	224.24	288.639	175.557	250.443	244.656	222.318	197.25		27.4201	0.913738	0.887877	0.959915	0.929092	0.919072	0.962826	0.935209	0.914834	0.981047	0.93882	0.92812	0.95264	0.953589	0.947943	0.93748	0.000591039	0.0243113
27.4459	217.893	269.308	230.438	239.86	256.153	172.092	233.185	237.64	297.346	188.621	271.157	258.17	242.246	210.28		27.4459	205.893	257.308	218.438	227.86	244.153	160.092	221.185	225.64	285.346	176.621	259.157	246.17	230.246	198.28		27.4459	0.893651	0.890316	0.963754	0.933879	0.934205	0.929886	0.936407	0.920545	0.969855	0.94451	0.960413	0.958536	0.987595	0.952893	0.941175	0.00075614	0.027498
27.4717	221.639	266.66	231.361	242.209	251.314	169.326	237.892	240.5	293.663	188.305	270.631	260.14	236.101	214.28		27.4717	209.639	254.66	219.361	230.209	239.314	157.326	225.892	228.5	281.663	176.305	258.631	248.14	224.101	202.28		27.4717	0.90991	0.881154	0.967826	0.943506	0.915689	0.91382	0.956334	0.932213	0.957336	0.94282	0.958464	0.966206	0.961237	0.972116	0.941331	0.000734818	0.0271075
27.5064	215.01	273.367	238.355	241.109	258.624	175.3	235.309	237.507	295.943	185.98	265.262	253.078	237.645	215.226		27.5064	203.01	261.367	226.355	229.109	246.624	163.3	223.309	225.507	283.943	173.98	253.262	241.078	225.645	203.226		27.5064	0.881138	0.904361	0.998684	0.938998	0.943659	0.94852	0.945399	0.920003	0.965086	0.930387	0.938566	0.938708	0.96786	0.976663	0.942716	0.000879783	0.0296611
27.5448	223.511	274.071	231.555	241.671	258.074	171.672	233.923	241.621	302.174	192.947	271.355	262.58	238.571	207.318		27.5448	211.511	262.071	219.555	229.671	246.074	159.672	221.923	229.621	290.174	180.947	259.355	250.58	226.571	195.318		27.5448	0.918035	0.906796	0.968682	0.941301	0.941555	0.927447	0.939531	0.936786	0.986264	0.967644	0.961147	0.975707	0.971832	0.938658	0.94867	0.000551476	0.0234835
27.5706	222.736	275.633	237.6	235.775	250.804	172.616	231.396	242.07	300.027	188.955	268.992	259.254	233.21	210.27		27.5706	210.736	263.633	225.6	223.775	238.804	160.616	219.396	230.07	288.027	176.955	256.992	247.254	221.21	198.27		27.5706	0.914671	0.912201	0.995353	0.917137	0.913738	0.93293	0.928833	0.938618	0.978967	0.946296	0.95239	0.962757	0.948837	0.952845	0.942541	0.000634568	0.0251906
27.609	220.675	273.337	237.248	241.33	254.176	171.539	234.119	248.083	298.204	188.213	268.22	256.447	233.796	212.347		27.609	208.675	261.337	225.248	229.33	242.176	159.539	222.119	236.083	286.204	176.213	256.22	244.447	221.796	200.347		27.609	0.905726	0.904257	0.993799	0.939904	0.92664	0.926674	0.940361	0.96315	0.972771	0.942328	0.949529	0.951827	0.95135	0.962827	0.945082	0.00060286	0.0245532
27.6312	218.816	275.795	228.237	240.529	251.103	168.415	233.161	236.485	300.667	190.164	267.135	258.199	236.068	212.736		27.6312	206.816	263.795	216.237	228.529	239.103	156.415	221.161	224.485	288.667	178.164	255.135	246.199	224.068	200.736		27.6312	0.897657	0.912762	0.954043	0.936621	0.914882	0.908528	0.936305	0.915833	0.981142	0.952762	0.945508	0.958649	0.961096	0.964696	0.938606	0.000632608	0.0251517
27.6696	214.804	274.914	235.539	243.173	258.02	171.762	230.819	238.665	297.133	188.103	267.427	258.632	231.29	209.46		27.6696	202.804	262.914	223.539	231.173	246.02	159.762	218.819	226.665	285.133	176.103	255.427	246.632	219.29	197.46		27.6696	0.880244	0.909713	0.986259	0.947457	0.941348	0.927969	0.92639	0.924727	0.969131	0.94174	0.94659	0.960335	0.940601	0.948952	0.93939	0.000664041	0.025769
27.6954	225.786	270.123	228.754	240.522	250.96	170.602	231.878	243.531	298.949	188.141	267.387	258.76	238.093	215.036		27.6954	213.786	258.123	216.754	228.522	238.96	158.602	219.878	231.531	286.949	176.141	255.387	246.76	226.093	203.036		27.6954	0.927909	0.893136	0.956324	0.936592	0.914335	0.921231	0.930874	0.944579	0.975303	0.941943	0.946442	0.960833	0.969782	0.975749	0.942502	0.000579894	0.024081
27.7338	226.826	269.14	229.398	241.24	255.546	172.019	234.327	243.696	297.955	189.558	267.932	259.127	227.586	213.894		27.7338	214.826	257.14	217.398	229.24	243.546	160.019	222.327	231.696	285.955	177.558	255.932	247.127	215.586	201.894		27.7338	0.932423	0.889735	0.959165	0.939535	0.931882	0.929462	0.941242	0.945252	0.971924	0.949521	0.948461	0.962262	0.924714	0.970261	0.94256	0.000453252	0.0212897
27.7559	216.71	276.314	232.091	242.363	255.678	176.997	230.724	239.004	292.264	192.117	269.25	260.646	241.82	218.229		27.7559	204.71	264.314	220.091	230.363	243.678	164.997	218.724	227.004	280.264	180.117	257.25	248.646	229.82	206.229		27.7559	0.888516	0.914558	0.971047	0.944137	0.932387	0.958376	0.925988	0.92611	0.952581	0.963206	0.953346	0.968177	0.985768	0.991094	0.948235	0.000806812	0.0284044
27.7943	220.866	278.469	235.717	243.197	253.527	171.928	231.176	240.058	304.528	188.803	267.982	254.879	236.481	207.68		27.7943	208.866	266.469	223.717	231.197	241.527	159.928	219.176	228.058	292.528	176.803	255.982	242.879	224.481	195.68		27.7943	0.906555	0.922014	0.987045	0.947556	0.924157	0.928933	0.927902	0.93041	0.994265	0.945483	0.948647	0.945721	0.962867	0.940398	0.943711	0.000595133	0.0243954
27.8201	215.911	280.24	231.6	233.441	255.969	175.355	231.492	241.695	297.984	185.922	268.072	253.32	233.47	208.912		27.8201	203.911	268.24	219.6	221.441	243.969	163.355	219.492	229.695	285.984	173.922	256.072	241.32	221.47	196.912		27.8201	0.885048	0.928142	0.96888	0.907571	0.933501	0.948839	0.929239	0.937088	0.972023	0.930077	0.94898	0.939651	0.949952	0.946319	0.937522	0.000503722	0.0224438
27.8585	219.449	277.781	231.985	244.112	254.361	173.377	231.838	244.011	294.164	189.371	266.666	252.933	234.202	210.132		27.8585	207.449	265.781	219.985	232.112	242.361	161.377	219.838	232.011	282.164	177.371	254.666	240.933	222.202	198.132		27.8585	0.900405	0.919634	0.970579	0.951306	0.927348	0.93735	0.930704	0.946537	0.959039	0.948521	0.94377	0.938144	0.953092	0.952182	0.941329	0.00031458	0.0177364
27.8806	221.447	272.474	230.723	241.904	263.433	169.611	231.919	242.413	299.568	189.228	266.658	258.57	234.275	208.068		27.8806	209.447	260.474	218.723	229.904	251.433	157.611	219.919	230.413	287.568	177.228	254.658	246.57	222.275	196.068		27.8806	0.909077	0.901271	0.965011	0.942256	0.96206	0.915475	0.931047	0.940018	0.977407	0.947756	0.94374	0.960093	0.953405	0.942263	0.942206	0.000480691	0.0219247
27.9191	219.264	280.303	238.304	236.174	257.481	172.695	233.371	235.846	292.318	182.552	263.587	257.17	234.234	209.631		27.9191	207.264	268.303	226.304	224.174	245.481	160.695	221.371	223.846	280.318	170.552	251.587	245.17	222.234	197.631		27.9191	0.899602	0.92836	0.998459	0.918772	0.939286	0.933389	0.937194	0.913226	0.952765	0.912055	0.932359	0.954642	0.953229	0.949774	0.937365	0.000599574	0.0244862
27.9449	219.14	277.803	235.351	239.038	253.881	175.172	231.529	241.926	298.579	180.138	273.056	256.554	237.889	213.699		27.9449	207.14	265.803	223.351	227.038	241.881	163.172	219.529	229.926	286.579	168.138	261.056	244.554	225.889	201.699		27.9449	0.899063	0.91971	0.98543	0.93051	0.925511	0.947776	0.929396	0.938031	0.974045	0.899146	0.96745	0.952243	0.968907	0.969324	0.943324	0.000761575	0.0275966
27.9833	218.936	275.326	237.837	246.036	252.258	170.625	228.373	239.418	297.226	187.27	266.559	255.257	229.225	212.146		27.9833	206.936	263.326	225.837	234.036	240.258	158.625	216.373	227.418	285.226	175.27	254.559	243.257	217.225	200.146		27.9833	0.898178	0.911139	0.996398	0.959191	0.919301	0.921365	0.916035	0.927799	0.969447	0.937286	0.943373	0.947193	0.931744	0.961861	0.938594	0.000698919	0.0264371
28.0054	214.957	277.765	237.51	235.881	249.873	170.704	234.382	239.846	306.49	188.633	270.068	253.215	237.862	218.114		28.0054	202.957	265.765	225.51	223.881	237.873	158.704	222.382	227.846	294.49	176.633	258.068	241.215	225.862	206.114		28.0054	0.880908	0.919578	0.994955	0.917571	0.910175	0.921824	0.941475	0.929545	1.00093	0.944574	0.956377	0.939242	0.968791	0.990542	0.944035	0.00122473	0.0349962
28.0438	215.858	282.182	233.901	238.502	257.568	177.106	236.23	242.258	303.059	187.773	265.977	259.838	236.034	213.467		28.0438	203.858	270.182	221.901	226.502	245.568	165.106	224.23	230.258	291.059	175.773	253.977	247.838	224.034	201.467		28.0438	0.884818	0.934861	0.979032	0.928313	0.939619	0.95901	0.949298	0.939385	0.989272	0.939975	0.941216	0.965031	0.96095	0.968209	0.948499	0.000650689	0.0255086
28.0696	219.233	276.432	229.408	242.617	256.126	180.303	230.733	240.149	297.877	191.212	264.65	256.853	234.443	218.199		28.0696	207.233	264.432	217.408	230.617	244.126	168.303	218.733	228.149	285.877	179.212	252.65	244.853	222.443	206.199		28.0696	0.899467	0.914966	0.959209	0.945178	0.934101	0.977579	0.926026	0.930781	0.971659	0.958366	0.936298	0.953408	0.954126	0.99095	0.94658	0.000624242	0.0249848
28.108	218.998	279.149	232.504	242.348	254.092	176.861	231.925	233.793	297.081	189.685	266.968	259.644	230.306	211.403		28.108	206.998	267.149	220.504	230.348	242.092	164.861	219.925	221.793	285.081	177.685	254.968	247.644	218.306	199.403		28.108	0.898447	0.924367	0.972869	0.944076	0.926319	0.957587	0.931073	0.904851	0.968954	0.9502	0.944889	0.964275	0.936381	0.95829	0.941613	0.000518956	0.0227806
28.1301	222.129	276.276	236.102	238.361	254.15	172.257	225.487	244.016	293.752	192.113	263.515	258.65	238.216	212.628		28.1301	210.129	264.276	224.102	226.361	242.15	160.257	213.487	232.016	281.752	180.113	251.515	246.65	226.216	200.628		28.1301	0.912037	0.914426	0.988743	0.927735	0.926541	0.930844	0.903817	0.946557	0.957639	0.963184	0.932092	0.960405	0.970309	0.964177	0.94275	0.000638793	0.0252743
28.1685	223.078	279.76	233.828	243.706	254.364	171.509	231.37	236.834	299.142	186.052	263.446	258.452	237.59	213.972		28.1685	211.078	267.76	221.828	231.706	242.364	159.509	219.37	224.834	287.142	174.052	251.446	246.452	225.59	201.972		28.1685	0.916156	0.926481	0.97871	0.949642	0.927359	0.9265	0.928723	0.917257	0.975959	0.930772	0.931837	0.959634	0.967624	0.970636	0.943378	0.000515498	0.0227046
28.1962	221.49	281.998	236.228	244.538	252.912	176.326	232.523	243.876	290.948	185.732	271.353	250.615	232.739	210.56		28.1962	209.49	269.998	224.228	232.538	240.912	164.326	220.523	231.876	278.948	173.732	259.353	238.615	220.739	198.56		28.1962	0.909263	0.934225	0.989299	0.953052	0.921804	0.954479	0.933604	0.945986	0.948109	0.929061	0.961139	0.929118	0.946817	0.954239	0.943585	0.000385869	0.0196435
28.2346	216.673	276.821	233.201	241.691	257.889	169.664	230.754	241.462	306.494	186.919	264.869	258.373	234.471	209.939		28.2346	204.673	264.821	221.201	229.691	245.889	157.664	218.754	229.462	294.494	174.919	252.869	246.373	222.471	197.939		28.2346	0.888356	0.916312	0.975944	0.941383	0.940847	0.915783	0.926115	0.936138	1.00095	0.935408	0.93711	0.959326	0.954246	0.951254	0.941369	0.000749069	0.0273691
28.2567	212.972	282.219	238.784	242.464	254.626	175.899	229.277	240.005	302.612	192.249	265.949	255.59	231.787	208.335		28.2567	200.972	270.219	226.784	230.464	242.626	163.899	217.277	228.005	290.612	180.249	253.949	243.59	219.787	196.335		28.2567	0.872292	0.93499	1.00058	0.944551	0.928362	0.951999	0.919862	0.930194	0.987753	0.963912	0.941112	0.94849	0.942733	0.943546	0.943598	0.000911157	0.0301854
28.2951	218.803	273.509	236.372	240.154	255.826	173.275	234.016	240.747	296.196	189.336	271.027	260.745	234.219	210.725		28.2951	206.803	261.509	224.372	228.154	243.826	161.275	222.016	228.747	284.196	177.336	259.027	248.745	222.219	198.725		28.2951	0.897601	0.904852	0.989935	0.935084	0.932953	0.936757	0.939925	0.933221	0.965946	0.948334	0.959931	0.968562	0.953165	0.955032	0.944378	0.000595648	0.0244059
28.3209	216.072	278.489	233.143	234.21	257.526	173.251	232.954	241.534	300.894	188.324	267.78	253.566	235.237	211.619		28.3209	204.072	266.489	221.143	222.21	245.526	161.251	220.954	229.534	288.894	176.324	255.78	241.566	223.237	199.619		28.3209	0.885747	0.922083	0.975688	0.910723	0.939458	0.936618	0.935429	0.936432	0.981914	0.942922	0.947898	0.940609	0.957531	0.959328	0.940884	0.00061066	0.0247115
28.3593	210.42	273.54	229.632	239.257	254.645	172.474	233.414	240.452	306.308	189.45	265.511	256.184	237.255	206.569		28.3593	198.42	261.54	217.632	227.257	242.645	160.474	221.414	228.452	294.308	177.45	253.511	244.184	225.255	194.569		28.3593	0.861215	0.904959	0.960198	0.931408	0.928435	0.932105	0.937376	0.932017	1.00032	0.948943	0.939489	0.950803	0.966187	0.935059	0.937751	0.000973659	0.0312035
28.3815	220.831	278.626	241.071	243.755	255.574	170.789	230.378	237.342	299.291	186.439	269.437	255.376	234.87	211.364		28.3815	208.831	266.626	229.071	231.755	243.574	158.789	218.378	225.342	287.291	174.439	257.437	243.376	222.87	199.364		28.3815	0.906403	0.922557	1.01067	0.949843	0.931989	0.922318	0.924523	0.919329	0.976465	0.932842	0.954039	0.947656	0.955957	0.958103	0.943764	0.000737538	0.0271577
28.4199	216.473	276.376	236.222	238.865	257.583	172.324	233.123	242.792	303.83	188.646	268.594	256.946	233.703	212.839		28.4199	204.473	264.376	224.222	226.865	245.583	160.324	221.123	230.792	291.83	176.646	256.594	244.946	221.703	200.839		28.4199	0.887488	0.914772	0.989273	0.929801	0.939676	0.931234	0.936144	0.941564	0.991893	0.944644	0.950915	0.95377	0.950952	0.965191	0.944808	0.000728778	0.0269959
28.4457	210.56	277.265	231.666	240.573	253.661	174.582	230.63	238.029	300.489	186.006	269.735	254.714	232.879	207.264		28.4457	198.56	265.265	219.666	228.573	241.661	162.582	218.63	226.029	288.489	174.006	257.735	242.714	220.879	195.264		28.4457	0.861823	0.917848	0.969172	0.936801	0.924669	0.944349	0.92559	0.922132	0.980537	0.930526	0.955143	0.945079	0.947417	0.938399	0.935678	0.000771426	0.0277745
28.4841	213.163	276.331	230.655	243.534	254.011	173.749	234.876	241.593	303.573	191.89	267.109	256.595	234.967	208.616		28.4841	201.163	264.331	218.655	231.534	242.011	161.749	222.876	229.593	291.573	179.89	255.109	244.595	222.967	196.616		28.4841	0.873121	0.914616	0.964711	0.948937	0.926009	0.939511	0.943566	0.936672	0.991019	0.961992	0.945411	0.952403	0.956373	0.944896	0.942803	0.000729171	0.0270032
28.5062	216.629	277.936	235.298	245.45	258.275	177.741	232.389	241.961	296.469	190.04	271.027	259.896	235.671	210.816		28.5062	204.629	265.936	223.298	233.45	246.275	165.741	220.389	229.961	284.469	178.04	259.027	247.896	223.671	198.816		28.5062	0.888165	0.92017	0.985196	0.956789	0.942324	0.962698	0.933037	0.938174	0.966874	0.952099	0.959931	0.965256	0.959393	0.955469	0.94897	0.000566911	0.0238099
28.5446	221.215	269.44	238.298	245.451	258.413	178.456	229.778	235.623	299.43	187.39	270.617	263.061	232.509	210.582		28.5446	209.215	257.44	226.298	233.451	246.413	166.456	217.778	223.623	287.43	175.39	258.617	251.061	220.509	198.582		28.5446	0.90807	0.890773	0.998432	0.956794	0.942852	0.966851	0.921983	0.912316	0.976938	0.937927	0.958412	0.97758	0.94583	0.954344	0.946364	0.000903995	0.0300665
28.5704	225.057	275.234	232.986	241.541	254.307	177.644	236.801	241.674	299.84	190.964	273.942	256.448	231.869	211.348		28.5704	213.057	263.234	220.986	229.541	242.307	165.644	224.801	229.674	287.84	178.964	261.942	244.448	219.869	199.348		28.5704	0.924745	0.910821	0.974995	0.940768	0.927141	0.962135	0.951716	0.937003	0.978331	0.95704	0.970734	0.951831	0.943085	0.958026	0.949169	0.000393269	0.019831
28.6088	217.398	276.293	232.453	240.129	253.72	173.446	242.394	238.068	299.246	185.61	264.161	264.947	230.572	206.961		28.6088	205.398	264.293	220.453	228.129	241.72	161.446	230.394	226.068	287.246	173.61	252.161	252.947	218.572	194.961		28.6088	0.891502	0.914485	0.972644	0.934981	0.924895	0.937751	0.975394	0.922291	0.976312	0.928408	0.934486	0.984924	0.937522	0.936943	0.940896	0.000723013	0.0268889
28.6309	220.576	275.26	235.95	236.168	254.287	176.502	231.786	233.755	300.657	185.754	264.897	260.143	230.391	213.132		28.6309	208.576	263.26	223.95	224.168	242.287	164.502	219.786	221.755	288.657	173.754	252.897	248.143	218.391	201.132		28.6309	0.905296	0.910911	0.988073	0.918747	0.927065	0.955501	0.930484	0.904696	0.981108	0.929178	0.937214	0.966218	0.936745	0.966599	0.939845	0.000752131	0.027425
28.6694	216.736	273.632	238.371	244.203	256.112	172.412	233.558	235.67	306.077	188.751	262.311	259.404	235.355	213.365		28.6694	204.736	261.632	226.371	232.203	244.112	160.412	221.558	223.67	294.077	176.751	250.311	247.404	223.355	201.365		28.6694	0.888629	0.905277	0.998754	0.951679	0.934048	0.931745	0.937986	0.912508	0.99953	0.945205	0.92763	0.963341	0.958037	0.967719	0.944435	0.0010295	0.0320859
28.6952	217.301	276.631	233.215	241.051	248.461	176.821	233.379	237.657	299.153	190.052	264.967	256.85	240.356	213.68		28.6952	205.301	264.631	221.215	229.051	236.461	164.821	221.379	225.657	287.153	178.052	252.967	244.85	228.356	201.68		28.6952	0.891081	0.915654	0.976006	0.93876	0.904773	0.957354	0.937228	0.920615	0.975996	0.952163	0.937473	0.953396	0.979488	0.969233	0.943516	0.000775357	0.0278452
28.7336	219.39	273.995	229.751	247.679	250.7	169.939	235.246	237.183	299.279	191.043	272.15	253.657	233.843	213.187		28.7336	207.39	261.995	217.751	235.679	238.7	157.939	223.246	225.183	287.279	179.043	260.15	241.657	221.843	201.187		28.7336	0.900148	0.906534	0.960723	0.965925	0.91334	0.91738	0.945132	0.918681	0.976425	0.957462	0.964093	0.940963	0.951552	0.966864	0.941801	0.00065659	0.025624
28.7557	220.568	277.521	234.595	240.804	257.821	172.307	230.444	246.958	300.506	189.137	273.045	255.755	237.541	213.725		28.7557	208.568	265.521	222.595	228.804	245.821	160.307	218.444	234.958	288.506	177.137	261.045	243.755	225.541	201.725		28.7557	0.905261	0.918734	0.982094	0.937748	0.940587	0.931135	0.924803	0.95856	0.980595	0.94727	0.96741	0.949132	0.967414	0.969449	0.948585	0.00055483	0.0235548
28.7941	221.582	277.209	230.92	241.186	252.381	172.95	232.099	241.264	299.18	187.865	262.373	255.627	239.317	215.064		28.7941	209.582	265.209	218.92	229.186	240.381	160.95	220.099	229.264	287.18	175.865	250.373	243.627	227.317	203.064		28.7941	0.909663	0.917654	0.96588	0.939314	0.919772	0.93487	0.931809	0.93533	0.976088	0.940467	0.92786	0.948634	0.975032	0.975884	0.942733	0.000503783	0.0224451
28.8199	223.657	275.595	235.029	242.264	253.514	176.102	230.468	240.829	301.517	189.425	264.447	254.472	237.011	209.153		28.8199	211.657	263.595	223.029	230.264	241.514	164.102	218.468	228.829	289.517	177.425	252.447	242.472	225.011	197.153		28.8199	0.918669	0.91207	0.984009	0.943732	0.924107	0.953178	0.924904	0.933555	0.984031	0.94881	0.935546	0.944136	0.965141	0.947477	0.94424	0.000490081	0.0221378
28.8583	217.47	280.695	237.926	242.236	254.395	174.524	231.313	237.582	299.807	187.724	263.556	258.891	234.689	209.041		28.8583	205.47	268.695	225.926	230.236	242.395	162.524	219.313	225.582	287.807	175.724	251.556	246.891	222.689	197.041		28.8583	0.891815	0.929716	0.996791	0.943617	0.927478	0.944012	0.928482	0.920309	0.978219	0.939713	0.932244	0.961343	0.955181	0.946939	0.942561	0.000655568	0.0256041
28.8804	212.461	275.399	233.691	244.168	252.057	174.594	236.426	241.325	302.323	184.269	267.413	252.777	236.422	216.292		28.8804	200.461	263.399	221.691	232.168	240.057	162.594	224.426	229.325	290.323	172.269	255.413	240.777	224.422	204.292		28.8804	0.870074	0.911392	0.978106	0.951535	0.918532	0.944419	0.950128	0.935579	0.986771	0.921237	0.946538	0.937536	0.962614	0.981786	0.942589	0.000972898	0.0311913
28.9188	217.341	272.302	236.033	243.235	254.318	174.879	232.7	243.035	293.969	180.349	263.803	260.099	234.134	218.351		28.9188	205.341	260.302	224.033	231.235	242.318	162.879	220.7	231.035	281.969	168.349	251.803	248.099	222.134	206.351		28.9188	0.891255	0.900676	0.988439	0.947711	0.927183	0.946074	0.934354	0.942555	0.958377	0.900274	0.93316	0.966047	0.9528	0.991681	0.94147	0.000924106	0.0303991
28.9446	221.015	273.694	237.479	246.824	251.988	174.516	232.571	239.788	298.703	186.482	264.649	252.78	230.643	208.12		28.9446	209.015	261.694	225.479	234.824	239.988	162.516	220.571	227.788	286.703	174.482	252.649	240.78	218.643	196.12		28.9446	0.907202	0.905492	0.994819	0.962421	0.918268	0.943966	0.933808	0.929308	0.974467	0.933072	0.936295	0.937548	0.937826	0.942513	0.939786	0.000590852	0.0243074
28.983	219.857	270.849	239.359	242.808	252.084	173.097	234.037	236.589	299.967	187.2	264.205	255.896	235.192	213.317		28.983	207.857	258.849	227.359	230.808	240.084	161.097	222.037	224.589	287.967	175.2	252.205	243.896	223.192	201.317		28.983	0.902175	0.895648	1.00311	0.945961	0.918635	0.935724	0.940014	0.916257	0.978763	0.936911	0.934649	0.949681	0.957338	0.967488	0.941597	0.000854619	0.0292339
29.0052	214.242	275.145	233.573	245.674	256.664	173.945	234.598	239.345	300.1	188.87	264.837	259.592	231.48	213.822		29.0052	202.242	263.145	221.573	233.674	244.664	161.945	222.598	227.345	288.1	176.87	252.837	247.592	219.48	201.822		29.0052	0.877804	0.910513	0.977585	0.957707	0.93616	0.940649	0.942389	0.927501	0.979215	0.945842	0.936991	0.964073	0.941416	0.969915	0.943412	0.000733508	0.0270833
29.0436	222.115	271.438	231.992	244.667	252.183	172.932	232.888	238.959	295.245	186.257	267.432	258.458	235.474	212.923		29.0436	210.115	259.438	219.992	232.667	240.183	160.932	220.888	226.959	283.245	174.257	255.432	246.458	223.474	200.923		29.0436	0.911976	0.897686	0.97061	0.95358	0.919014	0.934765	0.93515	0.925926	0.962713	0.931868	0.946608	0.959657	0.958548	0.965595	0.940978	0.00049111	0.022161
29.0712	223.469	275.666	228.808	242.513	256.669	171.221	230.633	235.515	300.379	185.109	267.77	258.375	232.028	216.554		29.0712	211.469	263.666	216.808	230.513	244.669	159.221	218.633	223.515	288.379	173.109	255.77	246.375	220.028	204.554		29.0712	0.917853	0.912315	0.956562	0.944752	0.936179	0.924827	0.925603	0.911876	0.980163	0.925729	0.947861	0.959334	0.943767	0.983045	0.940705	0.000531486	0.023054
29.1096	221.447	272.944	232.904	235.872	255.524	171.146	230.335	244.801	299.007	186.294	266.098	259.576	228.577	213.296		29.1096	209.447	260.944	220.904	223.872	243.524	159.146	218.335	232.801	287.007	174.294	254.098	247.576	216.577	201.296		29.1096	0.909077	0.902897	0.974634	0.917534	0.931798	0.924391	0.924341	0.94976	0.9755	0.932066	0.941665	0.96401	0.928965	0.967387	0.938859	0.000572657	0.0239303
29.1318	214.521	275.835	230.612	240.147	257.033	174.729	236.107	238.94	303.486	186.011	263.934	258.122	234.398	216.509		29.1318	202.521	263.835	218.612	228.147	245.033	162.729	224.107	226.94	291.486	174.011	251.934	246.122	222.398	204.509		29.1318	0.879015	0.9129	0.964521	0.935055	0.937572	0.945203	0.948778	0.925849	0.990724	0.930553	0.933645	0.958349	0.953933	0.982828	0.94278	0.000796071	0.0282147
29.1702	214.179	270.636	227.209	243.326	256.823	172.109	227.049	236.686	298.272	190.124	261.907	255.117	238.924	210.981		29.1702	202.179	258.636	215.209	231.326	244.823	160.109	215.049	224.686	286.272	178.124	249.907	243.117	226.924	198.981		29.1702	0.877531	0.894911	0.949507	0.948084	0.936768	0.929985	0.91043	0.916653	0.973002	0.952548	0.926133	0.946648	0.973346	0.956262	0.935129	0.000780669	0.0279405
29.196	220.462	277.816	234.948	238.359	253.599	171.627	232.349	238.947	301.804	189.385	268.182	259.082	235.425	208.977		29.196	208.462	265.816	222.948	226.359	241.599	159.627	220.349	226.947	289.804	177.385	256.182	247.082	223.425	196.977		29.196	0.904801	0.919755	0.983652	0.927727	0.924432	0.927185	0.932868	0.925877	0.985007	0.948596	0.949388	0.962087	0.958338	0.946631	0.942596	0.000563321	0.0237344
29.2344	212.605	267.743	229.824	238.002	255.064	170.417	228.643	243.048	303.115	185.614	267.966	262.514	232.167	208.979		29.2344	200.605	255.743	217.824	226.002	243.064	158.417	216.643	231.048	291.115	173.614	255.966	250.514	220.167	196.979		29.2344	0.870699	0.884901	0.961045	0.926264	0.930038	0.920157	0.917178	0.942608	0.989463	0.92843	0.948587	0.97545	0.944363	0.946641	0.934702	0.00100552	0.0317099
29.2565	215.946	265.793	230.329	233.326	257.739	176.002	228.753	243.431	296.764	188.351	267.998	257.809	228.273	211.357		29.2565	203.946	253.793	218.329	221.326	245.739	164.002	216.753	231.431	284.764	176.351	255.998	245.809	216.273	199.357		29.2565	0.8852	0.878154	0.963273	0.907099	0.940273	0.952597	0.917644	0.944171	0.967876	0.943066	0.948706	0.95713	0.927661	0.958069	0.935066	0.000801662	0.0283136
29.2949	215.367	279.442	234.963	238.241	251.39	168.02	231.454	239.017	304.012	187.298	273.256	260.12	232.511	213.424		29.2949	203.367	267.442	222.963	226.241	239.39	156.02	219.454	227.017	292.012	175.298	261.256	248.12	220.511	201.424		29.2949	0.882687	0.925381	0.983718	0.927244	0.91598	0.906234	0.929079	0.926163	0.992511	0.937435	0.968192	0.966129	0.945839	0.968003	0.941042	0.000972679	0.0311878
29.3207	215.699	273.723	230.997	245.878	255.339	178.997	230.486	239.828	296.155	184.635	267.411	259.648	229.696	212.853		29.3207	203.699	261.723	218.997	233.878	243.339	166.997	218.486	227.828	284.155	172.635	255.411	247.648	217.696	200.853		29.3207	0.884128	0.905592	0.96622	0.958544	0.93109	0.969993	0.924981	0.929472	0.965806	0.923194	0.94653	0.964291	0.933764	0.965258	0.940633	0.000684974	0.026172
29.3591	216.119	276.091	230.83	240.253	253.867	175.642	230.291	244.039	297.056	185.824	262.54	254.221	235.586	212.253		29.3591	204.119	264.091	218.83	228.253	241.867	163.642	218.291	232.039	285.056	173.824	250.54	242.221	223.586	200.253		29.3591	0.885951	0.913786	0.965483	0.93549	0.925458	0.950506	0.924155	0.946651	0.968869	0.929553	0.928479	0.943159	0.959028	0.962375	0.938496	0.000523974	0.0228905
29.3812	218.486	273.591	230.244	246.639	262.18	177.568	232.079	243.138	304.13	192.495	268.939	260.155	232.966	215.235		29.3812	206.486	261.591	218.244	234.639	250.18	165.568	220.079	231.138	292.13	180.495	256.939	248.155	220.966	203.235		29.3812	0.896225	0.905136	0.962898	0.961663	0.957266	0.961693	0.931725	0.942975	0.992912	0.965227	0.952193	0.966265	0.94779	0.976706	0.951477	0.000677697	0.0260326
29.4196	218.641	273.675	234.858	241.897	254.626	175.569	232.365	239.222	302.394	185.039	264.517	259.944	235.826	210.456		29.4196	206.641	261.675	222.858	229.897	242.626	163.569	220.365	227.222	290.394	173.039	252.517	247.944	223.826	198.456		29.4196	0.896898	0.905426	0.983255	0.942228	0.928362	0.950082	0.932935	0.926999	0.987012	0.925355	0.935806	0.965443	0.960058	0.953739	0.9424	0.000691164	0.02629
29.4454	219.245	273.599	229.425	244.206	252.751	182.028	238.142	239.673	303.73	188.796	269.055	256.971	231.221	211.704		29.4454	207.245	261.599	217.425	232.206	240.751	170.028	226.142	227.673	291.73	176.796	257.055	244.971	219.221	199.704		29.4454	0.899519	0.905163	0.959284	0.951691	0.921188	0.987599	0.957393	0.928839	0.991553	0.945446	0.952623	0.953867	0.940305	0.959737	0.946729	0.00070786	0.0266056
29.4839	214.307	272.779	232.32	235.411	255.82	171.954	233.319	238.799	299.399	195.786	266.598	255.095	235.361	214.431		29.4839	202.307	260.779	220.32	223.411	243.82	159.954	221.319	226.799	287.399	183.786	254.598	243.095	223.361	202.431		29.4839	0.878086	0.902326	0.972057	0.915645	0.93293	0.929084	0.936974	0.925274	0.976832	0.982826	0.943518	0.946562	0.958063	0.972842	0.94093	0.000915963	0.0302649
29.506	215.102	274.918	232.899	241.862	255.527	175.039	228.425	241.187	298.659	188.755	265.09	255.508	234.833	215.426		29.506	203.102	262.918	220.899	229.862	243.527	163.039	216.425	229.187	286.659	176.755	253.09	243.508	222.833	203.426		29.506	0.881537	0.909727	0.974612	0.942084	0.931809	0.947004	0.916255	0.935016	0.974317	0.945227	0.937929	0.94817	0.955798	0.977624	0.941222	0.000704749	0.0265471
29.5444	217.496	272.392	237.763	244.096	255.079	174.85	231.771	240.248	302.828	186.931	266.538	257.496	238.202	214.711		29.5444	205.496	260.392	225.763	232.096	243.079	162.85	219.771	228.248	290.828	174.931	254.538	245.496	226.202	202.711		29.5444	0.891928	0.900987	0.996072	0.95124	0.930095	0.945906	0.930421	0.931185	0.988487	0.935473	0.943295	0.955911	0.970249	0.974188	0.946103	0.000892594	0.0298763
29.5702	221.396	274.23	236.768	238.934	255.236	172.708	229.158	239.322	298.961	190.971	266.232	257.839	230.143	219.651		29.5702	209.396	262.23	224.768	226.934	243.236	160.708	217.158	227.322	286.961	178.971	254.232	245.839	218.143	207.651		29.5702	0.908855	0.907347	0.991682	0.930084	0.930696	0.933464	0.919358	0.927407	0.975344	0.957077	0.942161	0.957247	0.935682	0.997928	0.943881	0.000809686	0.028455
29.6086	220.421	275.038	230.024	239.294	250.503	173.707	233.735	236.436	296.364	188.605	266.683	254.93	227.331	210.805		29.6086	208.421	263.038	218.024	227.294	238.503	161.707	221.735	224.436	284.364	176.605	254.683	242.93	215.331	198.805		29.6086	0.904623	0.910142	0.961927	0.931559	0.912586	0.939267	0.938735	0.915633	0.966517	0.944425	0.943833	0.94592	0.92362	0.955416	0.9353	0.000385509	0.0196344
29.6307	219.84	271.323	234.694	237.784	260.07	174.065	234.115	242.469	298.957	190.536	267.759	261.299	232.247	208.8		29.6307	207.84	259.323	222.694	225.784	248.07	162.065	222.115	230.469	286.957	178.536	255.759	249.299	220.247	196.8		29.6307	0.902102	0.897288	0.982531	0.925371	0.949192	0.941346	0.940344	0.940246	0.97533	0.954751	0.94782	0.970719	0.944706	0.945781	0.944109	0.000589217	0.0242738
29.6691	211.155	263.743	228.251	243.487	258.078	178.27	231.797	241.498	304.847	188.166	266.159	258.65	235.276	211.447		29.6691	199.155	251.743	216.251	231.487	246.078	166.27	219.797	229.498	292.847	176.166	254.159	246.65	223.276	199.447		29.6691	0.864406	0.87106	0.954104	0.948744	0.94157	0.965771	0.930531	0.936285	0.995349	0.942077	0.941891	0.960405	0.957699	0.958501	0.940599	0.00120392	0.0346976
29.6949	218.68	272.47	228.901	241.615	258.392	173.776	231.148	242.818	299.742	180.658	259.9	259.083	237.304	210.493		29.6949	206.68	260.47	216.901	229.615	246.392	161.776	219.148	230.818	287.742	168.658	247.9	247.083	225.304	198.493		29.6949	0.897067	0.901257	0.956972	0.941072	0.942772	0.939667	0.927783	0.94167	0.977998	0.901927	0.918695	0.962091	0.966397	0.953917	0.937806	0.000650136	0.0254978
29.7333	213.526	269.36	230.053	240.462	257.65	176.243	233.7	237.325	297.708	189.483	265.961	260.702	232.055	210.12		29.7333	201.526	257.36	218.053	228.462	245.65	164.243	221.7	225.325	285.708	177.483	253.961	248.702	220.055	198.12		29.7333	0.874697	0.890496	0.962055	0.936346	0.939933	0.953997	0.938587	0.91926	0.971085	0.94912	0.941157	0.968395	0.943883	0.952124	0.938652	0.000756671	0.0275077
29.7555	217.29	275.937	236.765	242.002	252.39	175.792	230.714	244.065	298.679	185.992	265.252	251.351	230.872	213.427		29.7555	205.29	263.937	224.765	230.002	240.39	163.792	218.714	232.065	286.679	173.992	253.252	239.351	218.872	201.427		29.7555	0.891034	0.913253	0.991668	0.942658	0.919806	0.951377	0.925946	0.946757	0.974385	0.930451	0.938529	0.931984	0.938809	0.968017	0.940334	0.000668843	0.025862
29.7939	223.424	269.22	234.606	243.691	254.639	174.752	229.917	240.817	295.97	185.227	269.804	265.102	237.897	210.605		29.7939	211.424	257.22	222.606	231.691	242.639	162.752	217.917	228.817	283.97	173.227	257.804	253.102	225.897	198.605		29.7939	0.917657	0.890011	0.982143	0.94958	0.928412	0.945337	0.922572	0.933506	0.965178	0.92636	0.955399	0.985527	0.968941	0.954455	0.944648	0.000711413	0.0266723
29.8197	213.514	264.063	236.762	239.305	255.057	177.07	233.104	235.746	299.681	191.728	268.12	263.206	234.165	214.117		29.8197	201.514	252.063	224.762	227.305	243.057	165.07	221.104	223.746	287.681	179.728	256.12	251.206	222.165	202.117		29.8197	0.874644	0.872168	0.991655	0.931604	0.930011	0.958801	0.936064	0.912818	0.977791	0.961125	0.949158	0.978145	0.952933	0.971333	0.942732	0.00132898	0.0364552
29.8581	216.545	273.905	228.137	240.484	257.421	180.01	236.339	234.949	298.814	188.519	263.453	261.419	238.021	212.077		29.8581	204.545	261.905	216.137	228.484	245.421	168.01	224.339	222.949	286.814	176.519	251.453	249.419	226.021	200.077		29.8581	0.8878	0.906222	0.953602	0.936436	0.939056	0.975877	0.94976	0.909567	0.974844	0.943965	0.931862	0.971187	0.969473	0.961529	0.943656	0.000752822	0.0274376
29.8802	218.377	269.955	232.391	237.982	258.573	172.723	234.056	240.012	301.591	187.125	268.225	260.329	234.676	212.384		29.8802	206.377	257.955	220.391	225.982	246.573	160.723	222.056	228.012	289.591	175.125	256.225	248.329	222.676	200.384		29.8802	0.895752	0.892555	0.97237	0.926182	0.943464	0.933551	0.940094	0.930222	0.984283	0.93651	0.949547	0.966942	0.955125	0.963005	0.942114	0.000698655	0.0264321
29.9186	220.747	271.305	231.66	247.372	257.148	178.734	231.781	239.572	300.293	189.181	268.266	253.961	229.658	210.598		29.9186	208.747	259.305	219.66	235.372	245.148	166.734	219.781	227.572	288.293	177.181	256.266	241.961	217.658	198.598		29.9186	0.906038	0.897226	0.969145	0.964667	0.938012	0.968466	0.930463	0.928427	0.979871	0.947505	0.949699	0.942147	0.933601	0.954421	0.943549	0.000561332	0.0236924
29.9463	222.456	268.315	233.583	239.597	253.102	180.784	232.052	244.484	295.491	190.255	270.077	259.902	238.619	212.661		29.9463	210.456	256.315	221.583	227.597	241.102	168.784	220.052	232.484	283.491	178.255	258.077	247.902	226.619	200.661		29.9463	0.913456	0.88688	0.977629	0.932801	0.922531	0.980373	0.93161	0.948467	0.96355	0.953248	0.95641	0.96528	0.972038	0.964336	0.947758	0.000729685	0.0270127
29.9847	222.471	274.002	230.914	239.078	253.763	173.748	231.108	240.405	301.249	191.987	277.127	256.508	231.485	212.17		29.9847	210.471	262.002	218.914	227.078	241.763	161.748	219.108	228.405	289.249	179.987	265.127	244.508	219.485	200.17		29.9847	0.913521	0.906558	0.965854	0.930674	0.92506	0.939505	0.927614	0.931826	0.98312	0.96251	0.982537	0.952064	0.941438	0.961976	0.94459	0.00057921	0.0240668
30.0068	220.857	270.139	235.285	237.936	259.104	177.048	232.415	241.97	305.058	185.071	265.732	259.211	232.079	204.028		30.0068	208.857	258.139	223.285	225.936	247.104	165.048	220.415	229.97	293.058	173.071	253.732	247.211	220.079	192.028		30.0068	0.906516	0.893191	0.985139	0.925993	0.945496	0.958673	0.933147	0.93821	0.996067	0.925526	0.940308	0.962589	0.943986	0.922847	0.941263	0.000778927	0.0279093
30.0452	214.199	275.407	230.051	241.997	253.318	170.939	231.108	238.419	295.777	186.273	271.389	263.22	232.763	214.665		30.0452	202.199	263.407	218.051	229.997	241.318	158.939	219.108	226.419	283.777	174.273	259.389	251.22	220.763	202.665		30.0452	0.877618	0.911419	0.962046	0.942637	0.923357	0.923189	0.927614	0.923723	0.964522	0.931954	0.961273	0.978199	0.94692	0.973967	0.939174	0.000765322	0.0276645
30.071	216.963	277.261	235.171	237.526	251.957	176.715	228.947	239.468	303.998	182.644	265.312	253.629	233.697	212.607		30.071	204.963	265.261	223.171	225.526	239.957	164.715	216.947	227.468	291.998	170.644	253.312	241.629	221.697	200.607		30.071	0.889614	0.917834	0.984636	0.924313	0.918149	0.956739	0.918465	0.928003	0.992464	0.912547	0.938752	0.940854	0.950926	0.964076	0.938384	0.000831125	0.0288292
30.1094	215.595	275.003	232.591	241.545	255.729	176.228	235.333	236.39	303.733	195.141	260.626	257.623	234.923	213.254		30.1094	203.595	263.003	220.591	229.545	243.729	164.228	223.333	224.39	291.733	183.141	248.626	245.623	222.923	201.254		30.1094	0.883677	0.910021	0.973253	0.940785	0.932582	0.95391	0.945501	0.915446	0.991563	0.979377	0.921386	0.956406	0.956185	0.967186	0.944805	0.000889363	0.0298222
30.1315	221.184	269.61	236.762	245.164	252.62	177.794	233.354	236.486	301.193	185.376	270.769	255.628	239.761	211.346		30.1315	209.184	257.61	224.762	233.164	240.62	165.794	221.354	224.486	289.193	173.376	258.769	243.628	227.761	199.346		30.1315	0.907935	0.891361	0.991655	0.955617	0.920686	0.963006	0.937122	0.915837	0.98293	0.927157	0.958975	0.948638	0.976936	0.958016	0.945419	0.000886212	0.0297693
30.1699	218.035	268.076	230.311	241.18	262.067	173.638	237.823	238.216	303.008	187.068	274.776	257.247	234.274	212.589		30.1699	206.035	256.076	218.311	229.18	250.067	161.638	225.823	226.216	291.008	175.068	262.776	245.247	222.274	200.589		30.1699	0.894267	0.886053	0.963193	0.939289	0.956833	0.938866	0.956042	0.922895	0.989099	0.936205	0.973825	0.954942	0.953401	0.96399	0.944921	0.000814094	0.0285323
30.1957	214.408	279.132	235.122	243.128	252.027	176.756	233.474	234.616	304.008	190.265	271.303	254.084	233.899	214.167		30.1957	202.408	267.132	223.122	231.128	240.027	164.756	221.474	222.616	292.008	178.265	259.303	242.084	221.899	202.167		30.1957	0.878525	0.924308	0.98442	0.947273	0.918417	0.956977	0.93763	0.908208	0.992498	0.953302	0.960954	0.942626	0.951792	0.971573	0.944893	0.000923188	0.030384
30.2342	214.789	271.335	229.662	242.275	261.432	180.436	227.91	240.773	297.155	188.619	269.948	251.006	231.273	211.816		30.2342	202.789	259.335	217.662	230.275	249.432	168.436	215.91	228.773	285.155	176.619	257.948	239.006	219.273	199.816		30.2342	0.880178	0.89733	0.96033	0.943777	0.954404	0.978352	0.914075	0.933327	0.969205	0.9445	0.955932	0.930641	0.940529	0.960275	0.940204	0.000757487	0.0275225
30.2563	215.223	278.913	222.607	242.579	257.883	179.861	235.28	235.198	299.291	192.253	267.873	249.471	232.554	211.508		30.2563	203.223	266.913	210.607	230.579	245.883	167.861	223.28	223.198	287.291	180.253	255.873	237.471	220.554	199.508		30.2563	0.882062	0.92355	0.929203	0.945023	0.940824	0.975012	0.945276	0.910583	0.976465	0.963933	0.948243	0.924664	0.946023	0.958795	0.94069	0.00065211	0.0255365
30.2947	214.511	276.341	226.766	241.88	251.681	171.4	232.807	238.989	292.501	191.376	271.838	256.015	236.649	215.141		30.2947	202.511	264.341	214.766	229.88	239.681	159.4	220.807	226.989	280.501	179.376	259.838	244.015	224.649	203.141		30.2947	0.878972	0.914651	0.947553	0.942158	0.917093	0.925867	0.934807	0.926049	0.953387	0.959243	0.962937	0.950145	0.963588	0.976254	0.939479	0.00064771	0.0254502
30.3205	222.955	272.11	232.294	239.608	252.414	174.543	229.761	242.459	298.23	192.647	270.225	253.613	230.277	213.819		30.3205	210.955	260.11	220.294	227.608	240.414	162.543	217.761	230.459	286.23	180.647	258.225	241.613	218.277	201.819		30.3205	0.915622	0.900011	0.971942	0.932846	0.919898	0.944123	0.921911	0.940205	0.972859	0.96604	0.956959	0.940792	0.936256	0.969901	0.942098	0.00053121	0.023048
30.3589	219.29	271.485	237.682	242.507	256.224	173.246	234.968	236.375	303.023	190.13	267.143	260.478	237.351	208.675		30.3589	207.29	259.485	225.682	230.507	244.224	161.246	222.968	224.375	291.023	178.13	255.143	248.478	225.351	196.675		30.3589	0.899714	0.897849	0.995714	0.944728	0.934476	0.936589	0.943955	0.915384	0.98915	0.95258	0.945537	0.967523	0.966599	0.94518	0.945356	0.000837286	0.0289359
30.381	220.073	267.217	231.806	241.143	252.881	174.218	232.223	235.101	302.986	189.103	264.317	253.236	234.464	207.313		30.381	208.073	255.217	219.806	229.143	240.881	162.218	220.223	223.101	290.986	177.103	252.317	241.236	222.464	195.313		30.381	0.903113	0.883081	0.969789	0.939137	0.921685	0.942235	0.932334	0.910187	0.989024	0.947088	0.935064	0.939324	0.954216	0.938634	0.936065	0.00071094	0.0266635
30.4194	215.842	268.255	236.094	239.006	255.497	174.129	230.554	235.356	300.194	187.587	264.822	255.456	231.466	213.665		30.4194	203.842	256.255	224.094	227.006	243.497	162.129	218.554	223.356	288.194	175.587	252.822	243.456	219.466	201.665		30.4194	0.884749	0.886672	0.988708	0.930379	0.931695	0.941718	0.925268	0.911227	0.979535	0.938981	0.936936	0.947968	0.941356	0.969161	0.936739	0.000909125	0.0301517
30.4452	218.617	272.158	239.088	242.774	252.539	173.956	233.185	245.323	303.413	186.932	271.868	253.357	231.939	212.134		30.4452	206.617	260.158	227.088	230.774	240.539	161.956	221.185	233.323	291.413	174.932	259.868	241.357	219.939	200.134		30.4452	0.896793	0.900177	1.00192	0.945822	0.920376	0.940713	0.936407	0.95189	0.990475	0.935478	0.963048	0.939795	0.943385	0.961803	0.944863	0.000855034	0.029241
30.4836	216.899	267.017	231.998	244.331	250.838	173.779	228.828	240.95	302.908	186.075	263.258	258.538	235.254	208.937		30.4836	204.899	255.017	219.998	232.331	238.838	161.779	216.828	228.95	290.908	174.075	251.258	246.538	223.254	196.937		30.4836	0.889337	0.882389	0.970636	0.952203	0.913868	0.939685	0.917961	0.934049	0.988759	0.930895	0.93114	0.959969	0.957604	0.946439	0.936781	0.000870872	0.0295105
30.5058	213.073	266.573	231.561	241.159	258.741	173.997	234.419	237.018	302.603	189.694	269.319	257.943	231.171	209.224		30.5058	201.073	254.573	219.561	229.159	246.741	161.997	222.419	225.018	290.603	177.694	257.319	245.943	219.171	197.224		30.5058	0.87273	0.880853	0.968708	0.939203	0.944107	0.940951	0.941631	0.918008	0.987722	0.950248	0.953601	0.957652	0.940091	0.947818	0.938809	0.000944064	0.0307256
30.5442	213.176	270.213	232.248	239.033	261.111	176.829	230.136	234.868	302.649	188.285	267.717	265.158	234.304	212.326		30.5442	201.176	258.213	220.248	227.033	249.111	164.829	218.136	222.868	290.649	176.285	255.717	253.158	222.304	200.326		30.5442	0.873177	0.893447	0.971739	0.93049	0.953175	0.957401	0.923499	0.909236	0.987879	0.942713	0.947664	0.985746	0.953529	0.962726	0.942316	0.00111545	0.0333984
30.57	218.394	278.001	238.629	240.375	256.372	174.853	231.26	241.656	295.703	191.806	269.995	257.987	233.187	208.552		30.57	206.394	266.001	226.629	228.375	244.372	162.853	219.26	229.656	283.703	179.806	257.995	245.987	221.187	196.552		30.57	0.895825	0.920395	0.999892	0.93599	0.935043	0.945923	0.928257	0.936929	0.96427	0.961543	0.956107	0.957823	0.948738	0.944589	0.945095	0.000577706	0.0240355
30.6084	218.907	279.92	236.921	245.316	250.773	178.538	231.87	238.614	306.326	186.304	266.55	258.652	231.618	216.682		30.6084	206.907	267.92	224.921	233.316	238.773	166.538	219.87	226.614	294.326	174.304	254.55	246.652	219.618	204.682		30.6084	0.898052	0.927035	0.992357	0.95624	0.913619	0.967327	0.93084	0.924519	1.00038	0.93212	0.94334	0.960412	0.942008	0.98366	0.947993	0.000911537	0.0301917
30.6305	215.041	277.756	229.358	246.853	253.721	174.552	229.595	235.114	302.565	183.207	267.784	252.327	237.599	215.378		30.6305	203.041	265.756	217.358	234.853	241.721	162.552	217.595	223.114	290.565	171.207	255.784	240.327	225.599	203.378		30.6305	0.881272	0.919547	0.958989	0.96254	0.924899	0.944175	0.921208	0.91024	0.987593	0.915558	0.947913	0.935784	0.967663	0.977393	0.939627	0.000871121	0.0295148
30.6689	217.327	277.914	234.4	246.235	255.264	169.669	230.748	242.943	301.692	187.98	272.043	255.637	233.474	215.609		30.6689	205.327	265.914	222.4	234.235	243.264	157.669	218.748	230.943	289.692	175.98	260.043	243.637	221.474	203.609		30.6689	0.891194	0.920094	0.981234	0.960007	0.930803	0.915812	0.92609	0.94218	0.984626	0.941082	0.963696	0.948673	0.949969	0.978503	0.945283	0.000735936	0.0271281
30.6947	216.317	276.09	235.039	235.641	253.763	172.797	231.281	241.559	305.065	187.214	267.537	255.362	234.937	213.787		30.6947	204.317	264.09	223.039	223.641	241.763	160.797	219.281	229.559	293.065	175.214	255.537	243.362	222.937	201.787		30.6947	0.886811	0.913782	0.984053	0.916587	0.92506	0.933981	0.928346	0.936534	0.99609	0.936986	0.946997	0.947602	0.956245	0.969747	0.941344	0.000830618	0.0288204
30.7331	222.897	280.158	227.018	241.416	254.351	176.84	229.028	239.615	294.434	194.975	262.677	255.894	228.666	211.122		30.7331	210.897	268.158	215.018	229.416	242.351	164.84	217.028	227.615	282.434	182.975	250.677	243.894	216.666	199.122		30.7331	0.91537	0.927858	0.948664	0.940256	0.92731	0.957465	0.918808	0.928603	0.959957	0.978489	0.928987	0.949673	0.929346	0.95694	0.940552	0.00033577	0.018324
30.7552	215.564	276.309	233.819	241.269	253.852	173.844	229.666	239.991	297.892	186.265	270.388	256.142	236.338	213.507		30.7552	203.564	264.309	221.819	229.269	241.852	161.844	217.666	227.991	285.892	174.265	258.388	244.142	224.338	201.507		30.7552	0.883542	0.91454	0.978671	0.939654	0.9254	0.940062	0.921509	0.930137	0.97171	0.931911	0.957563	0.950639	0.962254	0.968401	0.941142	0.000673831	0.0259583
30.7936	219.739	273.573	233.303	243.008	250.119	179.199	229.217	238.763	296.448	185.773	274.371	261.168	234.773	214.189		30.7936	207.739	261.573	221.303	231.008	238.119	167.199	217.217	226.763	284.448	173.773	262.371	249.168	222.773	202.189		30.7936	0.901663	0.905073	0.976394	0.946781	0.911117	0.971167	0.919608	0.925127	0.966802	0.92928	0.972324	0.970209	0.955541	0.971679	0.944483	0.00078901	0.0280893
30.8213	222.284	278.214	237.747	238.848	254.483	169.146	231.67	239.523	297.249	189.956	267.577	258.929	232.972	219.433		30.8213	210.284	266.214	225.747	226.848	242.483	157.146	219.67	227.523	285.249	177.956	255.577	246.929	220.972	207.433		30.8213	0.912709	0.921132	0.996001	0.929731	0.927815	0.912774	0.929993	0.928227	0.969525	0.951649	0.947146	0.961491	0.947816	0.996881	0.945206	0.000762165	0.0276073
[truncated: 14 more rows]
[truncated: 1 more columns]

## Sheet: MRC5 XAB2-GFP UV
																average pre bleach																0
[truncated: 1,002 more rows]
[truncated: 1 more columns]

[truncated: 2 more sheets: MRC5 XAB2-GFP UV-ATMi, difference]
