# Supplementary material for: XAB2 dynamics during DNA damage-dependent transcription inhibition
Source: eLife. 2022 Jul 26;11:e77094. doi: 10.7554/eLife.77094 (PMC9436415; doi:10.7554/eLife.77094)
Supplement: Figure 4—source data 1. [file elife-77094-fig4-data1.xlsx]

## Sheet: No UV
Cell 00						Cell 01						Cell 02						Cell 03						Cell 04						Cell 05						Cell 06						Cell 07						Cell 08
	paste BG		average pre-bleach				paste BG		average pre-bleach				paste BG		average pre-bleach				paste BG		average pre-bleach				paste BG		average pre-bleach				paste BG		average pre-bleach				paste BG		average pre-bleach				paste BG		average pre-bleach				paste BG
	1	14.21	414.545				1	10.014	302.199				1	12.58	374.434				1	13.675	318.528				1	12.958	564.93				1	11.818	370.631				1	12.63	230.11				1	11.803	302.336				1
	paste FRAP	RAW					paste FRAP	RAW					paste FRAP	RAW					paste FRAP	RAW					paste FRAP	RAW					paste FRAP	RAW					paste FRAP	RAW					paste FRAP	RAW					paste FRAP
Time	data here		minus BG	Normalized		Time	data here		minus BG	Normalized		Time	data here		minus BG	Normalized		Time	data here		minus BG	Normalized		Time	data here		minus BG	Normalized		Time	data here		minus BG	Normalized		Time	data here		minus BG	Normalized		Time	data here		minus BG	Normalized		Time	data here
0	1	449.819	435.609	1.05081		0	1	326.286	316.272	1.04657		0	1	418.286	405.706	1.08352		0	1	346.943	333.268	1.04628		0	1	640.763	627.805	1.1113		0	1	408.694	396.876	1.07081		0	1	258.836	246.206	1.06995		0	1	331.394	319.591	1.05707		0	1
0.0798342	2	468.376	454.166	1.09558		0.0817251	2	325.688	315.674	1.04459		0.0798342	2	413.4	400.82	1.07047		0.0798342	2	354.49	340.815	1.06997		0.0798342	2	618.891	605.933	1.07258		0.0798342	2	404.588	392.77	1.05973		0.0798342	2	255.589	242.959	1.05584		0.0779433	2	340.832	329.029	1.08829		0.0798342	2
0.171676	3	463.131	448.921	1.08292		0.171455	3	327.167	317.153	1.04948		0.173677	3	397.097	384.517	1.02693		0.170675	3	353.012	339.337	1.06533		0.171676	3	622.838	609.88	1.07957		0.171676	3	392.738	380.92	1.02776		0.171676	3	256.895	244.265	1.06151		0.170896	3	338.047	326.244	1.07908		0.171676	3
0.271522	4	444.965	430.755	1.0391		0.272192	4	318.441	308.427	1.02061		0.271522	4	395.16	382.58	1.02175		0.270521	4	337.384	323.709	1.01627		0.270521	4	600.071	587.113	1.03927		0.271522	4	374.589	362.771	0.978793		0.271522	4	253.472	240.842	1.04664		0.270852	4	321.465	309.662	1.02423		0.273523	4
0.371368	5	445.742	431.532	1.04098		0.369926	5	310.234	300.22	0.993452		0.372369	5	402.347	389.767	1.04095		0.370368	5	337.039	323.364	1.01518		0.370368	5	601.53	588.572	1.04185		0.371368	5	389.363	377.545	1.01865		0.372369	5	246.827	234.197	1.01776		0.37281	5	323.169	311.366	1.02987		0.371368	5
0.471215	6	440.106	425.896	1.02738		0.471664	6	307.468	297.454	0.984299		0.472215	6	390.136	377.556	1.00834		0.471215	6	339.507	325.832	1.02293		0.470214	6	603.09	590.132	1.04461		0.472215	6	379.099	367.281	0.990961		0.472215	6	251.726	239.096	1.03905		0.470765	6	328.015	316.212	1.0459		0.472215	6
0.571061	7	453.482	439.272	1.05965		0.5724	7	311.43	301.416	0.99741		0.572061	7	384.489	371.909	0.993255		0.571061	7	331.381	317.706	0.997419		0.571061	7	585.22	572.262	1.01298		0.572061	7	394.658	382.84	1.03294		0.572061	7	246.559	233.929	1.0166		0.570722	7	334.678	322.875	1.06793		0.572061	7
0.671908	8	439.076	424.866	1.0249		0.672136	8	307.498	297.484	0.984398		0.671908	8	390.833	378.253	1.0102		0.670907	8	326.477	312.802	0.982024		0.671908	8	592.709	579.751	1.02623		0.671908	8	381.161	369.343	0.996525		0.671908	8	256.425	243.795	1.05947		0.670679	8	320.103	308.3	1.01973		0.673909	8
0.771754	9	434.803	420.593	1.01459		0.770872	9	316.593	306.579	1.01449		0.771754	9	378.591	366.011	0.977503		0.770753	9	332.088	318.413	0.999639		0.770753	9	593.834	580.876	1.02823		0.771754	9	368.742	356.924	0.963017		0.771754	9	247.253	234.623	1.01961		0.770635	9	320.995	309.192	1.02268		0.771754	9
0.8716	10	443.018	428.808	1.03441		0.870608	10	312.333	302.319	1.0004		0.8716	10	388.647	376.067	1.00436		0.8706	10	331.099	317.424	0.996534		0.8706	10	583.17	570.212	1.00935		0.8716	10	384.73	372.912	1.00615		0.872601	10	246.987	234.357	1.01846		0.870592	10	312.601	300.798	0.994913		0.8716	10
0.971447	11	439.677	425.467	1.02635		0.970344	11	307.574	297.56	0.98465		0.972447	11	388.306	375.726	1.00345		0.971447	11	327.675	314	0.985785		0.970446	11	581.897	568.939	1.0071		0.972447	11	377.204	365.386	0.985848		0.970446	11	236.514	223.884	0.972943		0.970548	11	319.489	307.686	1.0177		0.971447	11
1.07129	12	427.41	413.2	0.996755		1.07108	12	319.436	309.422	1.0239		1.07229	12	396.509	383.929	1.02536		1.07129	12	331.191	317.516	0.996823		1.07129	12	587.384	574.426	1.01681		1.07029	12	375.812	363.994	0.982092		1.07229	12	257.724	245.094	1.06512		1.07151	12	314.638	302.835	1.00165		1.07229	12
1.17214	13	428.919	414.709	1.0004		1.17182	13	314.903	304.889	1.0089		1.17214	13	394.373	381.793	1.01965		1.17114	13	328.567	314.892	0.988585		1.17114	13	588.55	575.592	1.01887		1.17214	13	383.722	371.904	1.00343		1.17214	13	245.587	232.957	1.01237		1.17146	13	319.408	307.605	1.01743		1.17214	13
1.27199	14	419.777	405.567	0.978342		1.27055	14	310.679	300.665	0.994925		1.27199	14	391.389	378.809	1.01168		1.27099	14	337.867	324.192	1.01778		1.27099	14	578.729	565.771	1.00149		1.27199	14	389.2	377.382	1.01821		1.27199	14	244.223	231.593	1.00644		1.27142	14	321.503	309.7	1.02436		1.27199	14
1.37183	15	438.24	424.03	1.02288		1.37029	15	311.293	301.279	0.996956		1.37183	15	389.667	377.087	1.00708		1.37083	15	337.548	323.873	1.01678		1.37283	15	578.707	565.749	1.00145		1.37183	15	388.97	377.152	1.01759		1.37283	15	248.81	236.18	1.02638		1.37138	15	308.407	296.604	0.981041		1.37183	15
1.47168	16	413.622	399.412	0.963494		1.47102	16	325.499	315.485	1.04397		1.47268	16	372.567	359.987	0.961415		1.47168	16	335.075	321.4	1.00902		1.47068	16	570.757	557.799	0.987377		1.47268	16	377.73	365.912	0.987267		1.47268	16	240.998	228.368	0.992429		-6468.35	16	314.362	302.559	1.00074		1.47168	16
1.57052	17	433.242	419.032	1.01082		1.57076	17	303.163	293.149	0.970053		1.57253	17	394.776	382.196	1.02073		1.57153	17	328.509	314.834	0.988403		1.57153	17	584.488	571.53	1.01168		1.57253	17	391.496	379.678	1.02441		1.57253	17	230.555	217.925	0.947046		1.57129	17	302.818	291.015	0.962555		1.57253	17
1.67137	18	422.71	408.5	0.985417		1.6725	18	317.815	307.801	1.01854		1.67237	18	379.592	367.012	0.980177		1.67137	18	327.045	313.37	0.983807		1.67137	18	578.021	565.063	1.00024		1.67237	18	378.565	366.747	0.98952		1.67237	18	236.923	224.293	0.97472		1.67125	18	316.938	305.135	1.00926		1.67237	18
1.77222	19	428.456	414.246	0.999278		1.77123	19	307.638	297.624	0.984862		1.77222	19	378.477	365.897	0.977199		1.77122	19	335.797	322.122	1.01128		1.77122	19	567.404	554.446	0.981442		1.77022	19	381.048	369.23	0.99622		1.77222	19	243.47	230.84	1.00317		1.7712	19	313.617	301.814	0.998274		1.77222	19
1.87206	20	435.499	421.289	1.01627		1.87097	20	304.128	294.114	0.973247		1.87206	20	384.489	371.909	0.993255		1.87106	20	332.756	319.081	1.00174		1.87106	20	562.945	549.987	0.973549		1.87206	20	380.744	368.926	0.995399		1.87307	20	242.598	229.968	0.999382		1.87116	20	310.209	298.406	0.987002		1.87206	20
2.03132	21	288.017	273.807	0.6605		2.034	21	196.686	186.672	0.617713		2.03132	21	270.123	257.543	0.687819		2.03032	21	223.993	210.318	0.660281		2.03032	21	392.205	379.247	0.671317		2.03132	21	260.967	249.149	0.672229		2.03232	21	171.702	159.072	0.691286		2.02663	21	217.276	205.473	0.679618		2.03132	21
2.11115	22	315.098	300.888	0.725827		2.11573	22	219.435	209.421	0.692991		2.11115	22	282.727	270.147	0.72148		2.11015	22	243.837	230.162	0.72258		2.11015	22	415.332	402.374	0.712254		2.11115	22	280.389	268.571	0.724632		2.11215	22	177.808	165.178	0.717821		2.10457	22	238.144	226.341	0.748641		2.11115	22
2.19799	23	334.705	320.495	0.773124		2.20146	23	237.447	227.433	0.752594		2.19999	23	299.534	286.954	0.766366		2.19899	23	241.452	227.777	0.715093		2.19899	23	450.587	437.629	0.77466		2.19999	23	287.988	276.17	0.745134		2.20199	23	194.676	182.046	0.791125		2.19552	23	234.093	222.29	0.735242		2.19999	23
2.29984	24	343.684	329.474	0.794784		2.30319	24	243.7	233.686	0.773286		2.29984	24	296.663	284.083	0.758699		2.29884	24	248.992	235.317	0.738764		2.29884	24	454.053	441.095	0.780796		2.29984	24	292.603	280.785	0.757586		2.30184	24	203.12	190.49	0.827821		2.29548	24	243.921	232.118	0.767749		2.29984	24
2.39968	25	351.257	337.047	0.813052		2.40393	25	245.688	235.674	0.779864		2.39968	25	299.808	287.228	0.767098		2.39868	25	258.818	245.143	0.769612		2.39868	25	472.034	459.076	0.812624		2.39968	25	305.226	293.408	0.791644		2.40168	25	204.252	191.622	0.83274		2.39544	25	253.537	241.734	0.799554		2.39968	25
2.49753	26	344.753	330.543	0.797363		2.50166	26	251.505	241.491	0.799113		2.50053	26	304.647	292.067	0.780022		2.49853	26	269.514	255.839	0.803192		2.49853	26	477.271	464.313	0.821894		2.50053	26	305.777	293.959	0.793131		2.50153	26	211.022	198.392	0.862161		2.49539	26	258.714	246.911	0.816678		2.49953	26
2.59938	27	357.71	343.5	0.828619		2.6034	27	259.376	249.362	0.825159		2.60038	27	319.593	307.013	0.819938		2.59938	27	268.084	254.409	0.798702		2.59938	27	502.812	489.854	0.867105		2.60038	27	308.772	296.954	0.801212		2.60238	27	201.894	189.264	0.822493		2.59635	27	270.386	258.583	0.855284		2.60038	27
2.69822	28	366.804	352.594	0.850556		2.70314	28	255.133	245.119	0.811118		2.70022	28	318.872	306.292	0.818012		2.69922	28	273.81	260.135	0.816679		2.69922	28	500.677	487.719	0.863326		2.70022	28	316.077	304.259	0.820921		2.70222	28	211.999	199.369	0.866407		2.69631	28	267.642	255.839	0.846208		2.70022	28
2.80007	29	366.812	352.602	0.850576		2.80187	29	263.109	253.095	0.837512		2.80007	29	324.527	311.947	0.833115		2.79907	29	278.852	265.177	0.832508		2.79707	29	501.469	488.511	0.864728		2.80007	29	320.204	308.386	0.832056		2.80207	29	204.9	192.27	0.835556		2.79626	29	274.913	263.11	0.870257		2.80007	29
2.89992	30	376.664	362.454	0.874341		2.90361	30	258.692	248.678	0.822895		2.89992	30	339.029	326.449	0.871845		2.89891	30	273.994	260.319	0.817256		2.89891	30	506.096	493.138	0.872918		2.89992	30	313.52	301.702	0.814022		2.90092	30	211.522	198.892	0.864334		2.89622	30	260.486	248.683	0.822539		2.89992	30
2.99976	31	356.267	342.057	0.825138		3.00235	31	261.468	251.454	0.832081		3.00076	31	330.206	317.626	0.848282		2.99876	31	290.911	277.236	0.870366		2.99876	31	502.368	489.41	0.866319		2.99976	31	322.73	310.912	0.838872		3.00176	31	210.213	197.583	0.858645		2.99618	31	257.697	245.894	0.813314		2.99976	31
3.09961	32	394.706	380.496	0.917864		3.10408	32	270.178	260.164	0.860903		3.10061	32	334.98	322.4	0.861032		3.09961	32	287.11	273.435	0.858433		3.09961	32	523.374	510.416	0.903503		3.10061	32	325.705	313.887	0.846899		3.10261	32	210.048	197.418	0.857928		3.09413	32	274.079	262.276	0.867499		3.10061	32
3.19845	33	380.758	366.548	0.884217		3.20382	33	269.94	259.926	0.860116		3.20046	33	334.714	322.134	0.860321		3.19745	33	286.526	272.851	0.8566		3.19945	33	515.817	502.859	0.890126		3.20046	33	334.631	322.813	0.870982		3.20246	33	210.298	197.668	0.859015		3.19609	33	274.444	262.641	0.868706		3.20046	33
3.3003	34	382.995	368.785	0.889613		3.30255	34	265.944	255.93	0.846893		3.3003	34	332.732	320.152	0.855028		3.2993	34	302.228	288.553	0.905895		3.2973	34	515.832	502.874	0.890152		3.2983	34	320.217	308.399	0.832092		3.3023	34	214.203	201.573	0.875985		3.29605	34	267.72	255.917	0.846466		3.3003	34
3.39815	35	383.955	369.745	0.891929		3.40429	35	269.233	259.219	0.857776		3.40015	35	341.901	329.321	0.879516		3.39915	35	287.735	274.06	0.860395		3.39915	35	524.542	511.584	0.90557		3.39915	35	322.435	310.617	0.838076		3.40115	35	219.791	207.161	0.900269		3.396	35	271.5	259.697	0.858968		3.40015	35
3.49799	36	374.75	360.54	0.869724		3.50203	36	273.389	263.375	0.871529		3.50099	36	336.416	323.836	0.864867		3.49799	36	288.892	275.217	0.864028		3.49799	36	520.532	507.574	0.898472		3.49999	36	327.124	315.306	0.850727		3.502	36	216.809	204.179	0.88731		3.49596	36	258.69	246.887	0.816598		3.49999	36
3.59984	37	368.429	354.219	0.854476		3.60376	37	276.962	266.948	0.883352		3.60084	37	344.912	332.332	0.887557		3.59984	37	297.589	283.914	0.891331		3.59984	37	516.759	503.801	0.891793		3.59884	37	328.899	317.081	0.855516		3.60284	37	217.527	204.897	0.89043		3.59592	37	273.367	261.564	0.865144		3.60084	37
3.69869	38	384.203	369.993	0.892528		3.7025	38	275.144	265.13	0.877336		3.70069	38	333.972	321.392	0.85834		3.69769	38	287.695	274.02	0.86027		3.69969	38	529.055	516.097	0.913559		3.70069	38	332.902	321.084	0.866317		3.70269	38	206.542	193.912	0.842692		3.69487	38	279.745	267.942	0.886239		3.70069	38
3.80053	39	396.226	382.016	0.92153		3.80224	39	284.306	274.292	0.907654		3.80053	39	348.322	335.742	0.896664		3.79953	39	287.085	273.41	0.858355		3.79753	39	508.014	495.056	0.876314		3.79853	39	325.647	313.829	0.846742		3.80053	39	212.012	199.382	0.866463		3.79683	39	274.145	262.342	0.867717		3.79853	39
3.89838	40	384.594	370.384	0.893471		3.90397	40	274.521	264.507	0.875275		3.90038	40	342.749	330.169	0.88178		3.89938	40	293.325	279.65	0.877945		3.89938	40	512.752	499.794	0.8847		3.89938	40	326.903	315.085	0.850131		3.90138	40	224.815	212.185	0.922102		3.89679	40	277.226	265.423	0.877908		3.90038	40
3.99822	41	381.14	366.93	0.885139		4.00271	41	268.188	258.174	0.854318		4.00123	41	335.594	323.014	0.862672		3.99822	41	294.93	281.255	0.882984		3.99822	41	518.587	505.629	0.895029		4.00023	41	327.991	316.173	0.853067		4.00223	41	223.598	210.968	0.916813		3.99474	41	282.577	270.774	0.895607		4.00023	41
4.09907	42	374.426	360.216	0.868943		4.10244	42	264.468	254.454	0.842009		4.09907	42	340.279	327.699	0.875184		4.10007	42	294.486	280.811	0.88159		4.10007	42	531.468	518.51	0.91783		4.09907	42	328.503	316.685	0.854448		4.10107	42	221.604	208.974	0.908147		4.0947	42	272.048	260.245	0.860781		4.10107	42
4.19892	43	393.081	378.871	0.913944		4.20218	43	273.787	263.773	0.872846		4.20092	43	344.166	331.586	0.885565		4.19792	43	296.142	282.467	0.886789		4.19792	43	521.478	508.52	0.900147		4.20092	43	336.841	325.023	0.876945		4.20292	43	220.09	207.46	0.901568		4.19666	43	283.994	272.191	0.900293		4.19892	43
4.29876	44	392.598	378.388	0.912779		4.30292	44	274.23	264.216	0.874312		4.29976	44	341.39	328.81	0.878151		4.29976	44	299.735	286.06	0.898069		4.29776	44	514.285	501.327	0.887414		4.29876	44	341.223	329.405	0.888768		4.30077	44	228.332	215.702	0.937386		4.29461	44	296.677	284.874	0.942243		4.29876	44
4.40061	45	392.096	377.886	0.911568		4.40265	45	269.817	259.803	0.859709		4.39961	45	354.947	342.367	0.914358		4.39861	45	291.703	278.028	0.872853		4.39961	45	536.843	523.885	0.927345		4.39961	45	326.281	314.463	0.848453		4.40061	45	216.382	203.752	0.885454		4.39457	45	285.838	274.035	0.906393		4.39961	45
4.49846	46	374.22	360.01	0.868446		4.50239	46	267.9	257.886	0.853365		4.50146	46	354.001	341.421	0.911831		4.49846	46	304.008	290.333	0.911483		4.49846	46	540.794	527.836	0.934338		4.49946	46	359.609	347.791	0.938375		4.50146	46	215.301	202.671	0.880756		4.49553	46	277.147	265.344	0.877646		4.50046	46
4.5993	47	391.594	377.384	0.910357		4.60313	47	274.258	264.244	0.874405		4.5993	47	349.1	336.52	0.898742		4.5983	47	299.065	285.39	0.895965		4.5983	47	526.96	514.002	0.90985		4.5993	47	345.865	334.047	0.901292		4.60131	47	227.103	214.473	0.932045		4.59548	47	289.304	277.501	0.917857		4.60131	47
4.69915	48	388.221	374.011	0.90222		4.70286	48	281.169	271.155	0.897274		4.70115	48	347.281	334.701	0.893884		4.69815	48	298.288	284.613	0.893526		4.69815	48	541.394	528.436	0.935401		4.70115	48	340.712	328.894	0.887389		4.70115	48	230.095	217.465	0.945047		4.69544	48	288.578	276.775	0.915455		4.70115	48
4.799	49	395.522	381.312	0.919832		4.8026	49	270.387	260.373	0.861595		4.801	49	347.502	334.922	0.894474		4.8	49	291.906	278.231	0.87349		4.798	49	536.313	523.355	0.926406		4.799	49	337.003	325.185	0.877382		4.801	49	228.192	215.562	0.936777		4.7954	49	290.226	278.423	0.920906		4.799	49
4.89884	50	387.972	373.762	0.901619		4.90333	50	274.84	264.826	0.87633		4.89984	50	351.453	338.873	0.905026		4.89884	50	296.789	283.114	0.88882		4.89984	50	525.819	512.861	0.907831		4.89984	50	334.383	322.565	0.870313		4.90084	50	220.842	208.212	0.904836		4.89535	50	283.44	271.637	0.898461		4.90084	50
4.99869	51	382.84	368.63	0.88924		5.00307	51	280.788	270.774	0.896013		5.00169	51	346.672	334.092	0.892258		4.99869	51	294.095	280.42	0.880362		4.99869	51	534.14	521.182	0.92256		4.99969	51	331.815	319.997	0.863384		5.00169	51	212.331	199.701	0.867849		4.99531	51	286.08	274.277	0.907193		4.99969	51
5.09954	52	393.555	379.345	0.915087		5.10281	52	290.077	280.063	0.926751		5.09954	52	351.438	338.858	0.904986		5.09854	52	303.775	290.1	0.910752		5.09854	52	532.755	519.797	0.920108		5.09954	52	336.851	325.033	0.876972		5.10154	52	230.052	217.422	0.94486		5.09527	52	279.447	267.644	0.885254		5.10154	52
5.19938	53	384.45	370.24	0.893123		5.20254	53	285.989	275.975	0.913223		5.20138	53	355.507	342.927	0.915853		5.19838	53	299.585	285.91	0.897598		5.19838	53	537.888	524.93	0.929194		5.19938	53	339.269	327.451	0.883496		5.20138	53	226.361	213.731	0.92882		5.19522	53	288.445	276.642	0.915015		5.19938	53
5.29923	54	378.029	363.819	0.877634		5.30328	54	276.78	266.766	0.88275		5.30023	54	357.152	344.572	0.920246		5.29823	54	292.082	278.407	0.874042		5.29823	54	531.706	518.748	0.918251		5.29923	54	349.636	337.818	0.911467		5.30123	54	213.767	201.137	0.87409		5.29518	54	275.725	263.922	0.872943		5.29923	54
5.39907	55	383.038	368.828	0.889717		5.40301	55	270.155	260.141	0.860827		5.40008	55	344.167	331.587	0.885567		5.39907	55	296.847	283.172	0.889002		5.39807	55	526.519	513.561	0.90907		5.40008	55	346.126	334.308	0.901997		5.40108	55	226.521	213.891	0.929516		5.39514	55	288.559	276.756	0.915392		5.40008	55
5.49892	56	393.816	379.606	0.915717		5.50275	56	268.369	258.355	0.854917		5.49992	56	352.657	340.077	0.908242		5.49892	56	291.262	277.587	0.871468		5.49892	56	517.509	504.551	0.893121		5.49992	56	333.639	321.821	0.868305		5.50192	56	213.17	200.54	0.871495		5.49509	56	276.596	264.793	0.875824		5.49992	56
5.59977	57	396.613	382.403	0.922464		5.60349	57	276.569	266.555	0.882052		5.59977	57	349.562	336.982	0.899976		5.59877	57	296.346	282.671	0.887429		5.59877	57	522.456	509.498	0.901878		5.59977	57	344.945	333.127	0.89881		5.60177	57	224.578	211.948	0.921072		5.59505	57	289.235	277.432	0.917628		5.59977	57
5.69961	58	401.123	386.913	0.933343		5.70322	58	280.529	270.515	0.895156		5.69961	58	349.631	337.051	0.90016		5.69861	58	298.678	285.003	0.89475		5.69861	58	523.779	510.821	0.90422		5.69961	58	339.562	327.744	0.884286		5.70162	58	225.804	213.174	0.9264		5.69601	58	291.893	280.09	0.92642		5.69961	58
5.79946	59	380.296	366.086	0.883103		5.80296	59	274.949	264.935	0.876691		5.79946	59	361.038	348.458	0.930625		5.79846	59	298.41	284.735	0.893909		5.79846	59	537.367	524.409	0.928272		5.79946	59	343.79	331.972	0.895694		5.80146	59	234.534	221.904	0.964338		5.79596	59	281.327	269.524	0.891472		5.79946	59
5.89931	60	386.406	372.196	0.897842		5.9037	60	282.409	272.395	0.901377		5.90031	60	340.965	328.385	0.877016		5.89931	60	298.398	284.723	0.893871		5.89831	60	534.116	521.158	0.922518		5.90031	60	346.892	335.074	0.904063		5.90131	60	218.48	205.85	0.894571		5.89592	60	289.791	277.988	0.919467		5.89931	60
5.99915	61	396.611	382.401	0.922459		6.00343	61	275.065	265.051	0.877075		6.00015	61	341.142	328.562	0.877489		5.99915	61	301.496	287.821	0.903597		5.99915	61	543.6	530.642	0.939305		6.00015	61	335.175	323.357	0.87245		6.00216	61	213.806	201.176	0.874259		5.99588	61	293.367	281.564	0.931295		6.00015	61
6.1	62	376.409	362.199	0.873726		6.10317	62	282.868	272.854	0.902896		6.1	62	354.973	342.393	0.914427		6.099	62	299.065	285.39	0.895965		6.099	62	531.423	518.465	0.917751		6.1	62	335.301	323.483	0.87279		6.102	62	217.93	205.3	0.892181		6.09583	62	294.148	282.345	0.933879		6.1	62
6.19985	63	378.897	364.687	0.879728		6.2039	63	281.658	271.644	0.898892		6.19985	63	345.641	333.061	0.889504		6.19885	63	313.206	299.531	0.94036		6.19885	63	533.944	520.986	0.922213		6.19985	63	335.101	323.283	0.87225		6.20185	63	222.178	209.548	0.910642		6.19579	63	285.705	273.902	0.905953		6.19985	63
6.29969	64	405.628	391.418	0.944211		6.30164	64	273.086	263.072	0.870526		6.29969	64	342.284	329.704	0.880539		6.29869	64	291.915	278.24	0.873518		6.29869	64	530.851	517.893	0.916738		6.29969	64	352.291	340.473	0.91863		6.30169	64	223.933	211.303	0.918269		6.29575	64	288.198	276.395	0.914198		6.29969	64
6.39954	65	391.7	377.49	0.910612		6.40338	65	270.686	260.672	0.862584		6.40054	65	337.116	324.536	0.866736		6.39954	65	309.286	295.611	0.928053		6.39854	65	522.032	509.074	0.901127		6.39854	65	345.716	333.898	0.90089		6.40154	65	223.547	210.917	0.916591		6.3957	65	297	285.197	0.943312		6.39954	65
6.49838	66	378.552	364.342	0.878896		6.50311	66	276.101	266.087	0.880503		6.50039	66	356.353	343.773	0.918113		6.49738	66	308.277	294.602	0.924886		6.49939	66	523.509	510.551	0.903742		6.50039	66	329.582	317.764	0.857359		6.50239	66	218.112	205.482	0.892972		6.49566	66	275.901	264.098	0.873525		6.50039	66
6.59923	67	381.19	366.98	0.885259		6.60385	67	273.63	263.616	0.872326		6.60023	67	345.844	333.264	0.890046		6.59923	67	293.31	279.635	0.877898		6.59923	67	528.526	515.568	0.912622		6.60023	67	343.818	332	0.895769		6.60223	67	220.83	208.2	0.904784		6.59562	67	276.948	265.145	0.876988		6.60023	67
6.70008	68	385.435	371.225	0.895499		6.70158	68	280.947	270.933	0.896539		6.70008	68	342.884	330.304	0.882141		6.69908	68	302.698	289.023	0.907371		6.69908	68	538.208	525.25	0.929761		6.70008	68	340.999	329.181	0.888163		6.70208	68	221.863	209.233	0.909273		6.69557	68	288.513	276.71	0.91524		6.70008	68
6.79992	69	393.385	379.175	0.914677		6.80232	69	275.59	265.576	0.878812		6.79992	69	352.443	339.863	0.90767		6.79892	69	305.195	291.52	0.91521		6.79792	69	531.105	518.147	0.917188		6.79992	69	327.118	315.3	0.850711		6.80193	69	212.287	199.657	0.867658		6.79553	69	288.275	276.472	0.914453		6.79992	69
6.89977	70	375.235	361.025	0.870894		6.90406	70	278.329	268.315	0.887876		6.90077	70	345.01	332.43	0.887819		6.89877	70	292.518	278.843	0.875411		6.89877	70	541.693	528.735	0.93593		6.89877	70	338.814	326.996	0.882268		6.90077	70	218.416	205.786	0.894293		6.89649	70	284.011	272.208	0.90035		6.89977	70
6.99962	71	381.649	367.439	0.886367		7.00179	71	269.638	259.624	0.859117		7.00062	71	363.883	351.303	0.938223		6.99962	71	289.878	276.203	0.867123		6.99762	71	538.427	525.469	0.930149		7.00062	71	362.284	350.466	0.945593		7.00262	71	210.841	198.211	0.861374		6.99644	71	281.667	269.864	0.892597		7.00062	71
7.09946	72	386.87	372.66	0.898961		7.10353	72	272.111	262.097	0.8673		7.10046	72	364.066	351.486	0.938712		7.09946	72	304.054	290.379	0.911628		7.09946	72	535.339	522.381	0.924682		7.10046	72	351.508	339.69	0.916518		7.10046	72	228.116	215.486	0.936447		7.0944	72	290.427	278.624	0.921571		7.10046	72
7.19831	73	391.039	376.829	0.909018		7.20427	73	271.111	261.097	0.863991		7.20031	73	356.234	343.654	0.917795		7.19731	73	299.532	285.857	0.897431		7.19931	73	543.435	530.477	0.939013		7.20031	73	341.652	329.834	0.889925		7.20231	73	219.29	206.66	0.898091		7.19636	73	290.058	278.255	0.920351		7.20031	73
7.30016	74	393.058	378.848	0.913888		7.302	74	268.702	258.688	0.856019		7.30016	74	351.019	338.439	0.903867		7.29916	74	306.901	293.226	0.920566		7.29816	74	538.689	525.731	0.930612		7.30016	74	353.942	342.124	0.923085		7.30116	74	228.677	216.047	0.938885		7.29631	74	287.14	275.337	0.910699		7.30016	74
7.398	75	389.906	375.696	0.906285		7.40274	75	274.999	264.985	0.876857		7.399	75	353.951	341.371	0.911698		7.399	75	306.164	292.489	0.918252		7.399	75	556.175	543.217	0.961565		7.399	75	351.589	339.771	0.916736		7.401	75	228.227	215.597	0.936929		7.39627	75	284.458	272.655	0.901828		7.4	75
7.49885	76	378.324	364.114	0.878346		7.50247	76	264.941	254.927	0.843574		7.50085	76	347.547	334.967	0.894594		7.49785	76	301.449	287.774	0.90345		7.49985	76	536.658	523.7	0.927017		7.50085	76	362.757	350.939	0.946869		7.50285	76	223.88	211.25	0.918038		7.49422	76	277.7	265.897	0.879475		7.49885	76
7.5987	77	395.561	381.351	0.919926		7.60421	77	274.316	264.302	0.874596		7.5987	77	344.7	332.12	0.886991		7.5997	77	312.038	298.363	0.936693		7.5997	77	535.784	522.826	0.92547		7.5987	77	339.232	327.414	0.883396		7.6027	77	231.637	219.007	0.951748		7.59518	77	284.616	272.813	0.902351		7.6007	77
7.69854	78	384.879	370.669	0.894158		7.70295	78	269.32	259.306	0.858064		7.70054	78	352.561	339.981	0.907985		7.69954	78	296.436	282.761	0.887712		7.69954	78	546.494	533.536	0.944428		7.70054	78	347.844	336.026	0.906632		7.70254	78	225.808	213.178	0.926417		7.69614	78	284.987	273.184	0.903578		7.70054	78
7.80039	79	398.369	384.159	0.9267		7.80268	79	279.951	269.937	0.893243		7.80039	79	350.296	337.716	0.901936		7.79939	79	310.232	296.557	0.931023		7.79839	79	543.745	530.787	0.939562		7.80039	79	354.613	342.795	0.924895		7.80139	79	221.299	208.669	0.906822		7.79509	79	289.661	277.858	0.919037		-6614.98	79
7.89823	80	393.928	379.718	0.915987		7.90242	80	270.679	260.665	0.862561		7.90124	80	346.579	333.999	0.892009		7.89823	80	315.052	301.377	0.946155		7.89923	80	556.342	543.384	0.96186		7.89923	80	350.332	338.514	0.913345		7.90124	80	220.885	208.255	0.905023		7.89605	80	289.209	277.406	0.917542		7.90024	80
7.99908	81	384.658	370.448	0.893625		8.00215	81	276.589	266.575	0.882118		8.00108	81	353.565	340.985	0.910667		7.99808	81	308.525	294.85	0.925664		8.00008	81	532.995	520.037	0.920533		7.99908	81	340.629	328.811	0.887165		8.00308	81	217.598	204.968	0.890738		7.99501	81	293.069	281.266	0.93031		7.99908	81
8.09993	82	383.923	369.713	0.891852		8.10389	82	282.334	272.32	0.901129		8.10093	82	351.286	338.706	0.90458		8.09793	82	310.44	296.765	0.931676		8.09993	82	541.14	528.182	0.934951		8.09893	82	349.924	338.106	0.912244		8.10093	82	216.108	203.478	0.884263		8.09496	82	293.217	281.414	0.930799		8.10093	82
8.19877	83	393.346	379.136	0.914583		8.20263	83	280.796	270.782	0.896039		8.20078	83	350.4	337.82	0.902214		8.19777	83	313.175	299.5	0.940263		8.19777	83	532.4	519.442	0.91948		8.20078	83	354.054	342.236	0.923387		8.20278	83	222.941	210.311	0.913958		8.19492	83	282.972	271.169	0.896913		8.20078	83
8.29862	84	393.012	378.802	0.913777		8.30236	84	266.572	256.558	0.848971		8.29962	84	356.44	343.86	0.918345		8.29962	84	304.962	291.287	0.914478		8.29762	84	531.791	518.833	0.918402		8.29962	84	350.849	339.031	0.91474		8.30062	84	221.062	208.432	0.905792		8.29488	84	296.825	285.022	0.942733		8.29962	84
8.39847	85	403.69	389.48	0.939536		8.4031	85	269.395	259.381	0.858312		8.40147	85	353.991	341.411	0.911804		8.39847	85	315.157	301.482	0.946485		8.39947	85	553.333	540.375	0.956534		8.39947	85	346.536	334.718	0.903103		8.40147	85	220.838	208.208	0.904819		8.39684	85	299.366	287.563	0.951137		8.40047	85
8.49931	86	388.446	374.236	0.902763		8.50284	86	267.23	257.216	0.851148		8.50131	86	354.435	341.855	0.91299		8.49831	86	302.827	289.152	0.907776		8.49831	86	536.573	523.615	0.926867		8.49931	86	349.939	338.121	0.912284		8.50131	86	226.382	213.752	0.928911		8.49479	86	297.711	285.908	0.945663		8.49931	86
8.60016	87	379.195	364.985	0.880447		8.60257	87	274.938	264.924	0.876655		8.59916	87	349.848	337.268	0.90074		8.60016	87	306.155	292.48	0.918224		8.59816	87	531.468	518.51	0.91783		8.59916	87	352.106	340.288	0.918131		8.60116	87	218.428	205.798	0.894345		8.59475	87	290.38	278.577	0.921416		8.60116	87
8.69901	88	393.611	379.401	0.915222		8.70331	88	261.763	251.749	0.833058		8.70101	88	341.41	328.83	0.878204		8.69801	88	300.389	286.714	0.900122		8.69801	88	537.103	524.145	0.927805		8.69901	88	351.736	339.918	0.917133		8.70101	88	220.102	207.472	0.90162		8.6947	88	291.118	279.315	0.923857		8.69901	88
8.79885	89	393.353	379.143	0.9146		8.80304	89	270.49	260.476	0.861936		8.79985	89	353.527	340.947	0.910565		8.79885	89	312.342	298.667	0.937648		8.79785	89	533.127	520.169	0.920767		8.79985	89	357.925	346.107	0.933832		8.80085	89	218.574	205.944	0.89498		8.79566	89	285.527	273.724	0.905364		8.79985	89
8.8987	90	404.941	390.731	0.942553		8.90278	90	268.961	258.947	0.856876		8.8997	90	353.239	340.659	0.909796		8.8987	90	307.801	294.126	0.923391		8.8987	90	540.764	527.806	0.934285		8.8997	90	355.184	343.366	0.926436		8.9017	90	210.072	197.442	0.858032		8.89562	90	283.809	272.006	0.899681		8.9007	90
8.99955	91	398.121	383.911	0.926102		9.00252	91	278.601	268.587	0.888776		8.99955	91	359.379	346.799	0.926194		8.99854	91	307.216	293.541	0.921555		8.99854	91	529.731	516.773	0.914755		8.99955	91	340.653	328.835	0.88723		9.00155	91	230.654	218.024	0.947476		8.99557	91	295.959	284.156	0.939869		8.99955	91
9.09939	92	394.646	380.436	0.917719		9.10325	92	278.816	268.802	0.889487		9.09939	92	351.443	338.863	0.904999		9.09839	92	298.71	285.035	0.894851		9.10039	92	525.117	512.159	0.906588		9.09939	92	364.288	352.47	0.951		9.10139	92	225.443	212.813	0.924831		9.09553	92	282.343	270.54	0.894833		9.09939	92
9.19924	93	400.535	386.325	0.931925		9.20299	93	271.305	261.291	0.864633		9.20024	93	357.109	344.529	0.920132		9.19824	93	296.778	283.103	0.888785		9.19824	93	538.211	525.253	0.929766		9.19924	93	347.673	335.855	0.906171		9.20324	93	219.891	207.261	0.900703		9.19549	93	284.136	272.333	0.900763		9.19924	93
9.29908	94	409.098	394.888	0.952581		9.30272	94	283.931	273.917	0.906413		9.30008	94	359.21	346.63	0.925743		9.29908	94	318.051	304.376	0.955571		9.29808	94	541.892	528.934	0.936282		9.30008	94	348.082	336.264	0.907274		9.30109	94	226.133	213.503	0.927829		9.29544	94	283.515	271.712	0.898709		9.30008	94
9.39893	95	409.724	395.514	0.954091		9.40346	95	271.245	261.231	0.864434		9.39993	95	356.668	344.088	0.918954		9.39893	95	316.825	303.15	0.951722		9.39893	95	552.195	539.237	0.95452		9.39993	95	353.124	341.306	0.920878		9.40193	95	235.266	222.636	0.967519		9.3954	95	282.779	270.976	0.896275		9.39993	95
9.49978	96	402.628	388.418	0.936974		9.5032	96	278.74	268.726	0.889236		9.49978	96	347.764	335.184	0.895174		9.49878	96	307.398	293.723	0.922126		9.49878	96	540.645	527.687	0.934075		9.49978	96	346.36	334.542	0.902628		9.50178	96	223.545	210.915	0.916583		9.49536	96	288.757	276.954	0.916047		9.49978	96
9.59962	97	402.476	388.266	0.936607		9.60293	97	274.166	264.152	0.8741		9.59962	97	356.081	343.501	0.917386		9.59862	97	315.945	302.27	0.948959		9.59862	97	547.531	534.573	0.946264		9.59962	97	356.389	344.571	0.929687		9.60163	97	231.552	218.922	0.951379		9.59531	97	285.392	273.589	0.904917		9.59962	97
9.69947	98	412.368	398.158	0.960469		9.70367	98	275.916	265.902	0.879891		9.69947	98	360.447	347.867	0.929046		9.69847	98	309.491	295.816	0.928697		9.69847	98	540.799	527.841	0.934347		9.69947	98	342.675	330.857	0.892685		9.70147	98	222.873	210.243	0.913662		9.69527	98	277.528	265.725	0.878907		9.69947	98
9.79932	99	407.688	393.478	0.94918		9.80341	99	277.987	267.973	0.886744		9.80032	99	344.058	331.478	0.885276		9.79932	99	310.793	297.118	0.932785		9.79832	99	529.572	516.614	0.914474		9.80032	99	337.9	326.082	0.879802		9.80132	99	227.087	214.457	0.931975		9.79523	99	276.27	264.467	0.874746		9.79932	99
9.89916	100	405.697	391.487	0.944377		9.90314	100	270.624	260.61	0.862379		9.90016	100	352.841	340.261	0.908733		9.89916	100	303.748	290.073	0.910667		9.89916	100	535.94	522.982	0.925746		9.90016	100	346.013	334.195	0.901692		9.90216	100	229.142	216.512	0.940906		9.89518	100	287.512	275.709	0.911929		9.90016	100
9.99801	101	401.621	387.411	0.934545		10.0039	101	278.917	268.903	0.889822		10	101	356.835	344.255	0.9194		9.99901	101	298.501	284.826	0.894195		9.99901	101	532.93	519.972	0.920418		10	101	351.466	339.648	0.916404		10.002	101	223.476	210.846	0.916283		9.99614	101	284.187	272.384	0.900932		10	101
10.0999	102	398.329	384.119	0.926603		10.1036	102	276.512	266.498	0.881863		10.0999	102	368.328	355.748	0.950094		10.0989	102	308.388	294.713	0.925234		10.0989	102	526.818	513.86	0.909599		10.0999	102	349.102	337.284	0.910026		10.1019	102	232.255	219.625	0.954434		10.0961	102	290.191	278.388	0.92079		10.0999	102
10.1977	103	389.975	375.765	0.906451		10.2034	103	276.365	266.351	0.881377		10.1997	103	358.531	345.951	0.923929		10.1987	103	306.746	293.071	0.920079		10.1987	103	530.185	517.227	0.915559		10.1997	103	341.133	329.315	0.888525		10.2017	103	227.538	214.908	0.933935		10.1961	103	290.009	278.206	0.920188		10.1997	103
10.2995	104	397.761	383.551	0.925233		10.3031	104	264.877	254.863	0.843362		10.3005	104	352.214	339.634	0.907059		10.2995	104	310.46	296.785	0.931739		10.2985	104	544.632	531.674	0.941132		10.3005	104	355.647	343.829	0.927685		10.3015	104	230.413	217.783	0.946429		10.296	104	283.769	271.966	0.899549		10.2995	104
10.3994	105	396.272	382.062	0.921641		10.4038	105	272.528	262.514	0.86868		10.4004	105	365.747	353.167	0.943201		10.3994	105	303.842	290.167	0.910962		10.3994	105	530.989	518.031	0.916982		10.4004	105	340.948	329.13	0.888026		10.4024	105	235.223	222.593	0.967332		10.396	105	286.108	274.305	0.907286		10.4004	105
10.4982	106	409.076	394.866	0.952528		10.5036	106	271.468	261.454	0.865172		10.5002	106	361.721	349.141	0.932449		10.4992	106	311.912	298.237	0.936298		10.4992	106	539.924	526.966	0.932798		10.5002	106	354.852	343.034	0.92554		10.5022	106	225.738	213.108	0.926113		10.4959	106	286.794	274.991	0.909555		10.5002	106
10.6001	107	396.763	382.553	0.922826		10.6033	107	276.737	266.723	0.882608		10.6001	107	358.507	345.927	0.923865		10.5991	107	309.14	295.465	0.927595		10.5991	107	539.439	526.481	0.93194		10.6001	107	354.712	342.894	0.925163		10.6021	107	220.385	207.755	0.90285		10.5939	107	284.846	273.043	0.903111		10.6001	107
10.6999	108	397.659	383.449	0.924987		10.702	108	282.893	272.879	0.902978		10.6999	108	364.022	351.442	0.938594		10.6989	108	310.081	296.406	0.930549		10.6989	108	537.644	524.686	0.928763		10.6999	108	341.811	329.993	0.890354		10.7019	108	224.148	211.518	0.919203		10.6958	108	287.587	275.784	0.912177		10.6999	108
10.7998	109	407.729	393.519	0.949279		10.8018	109	278.253	268.239	0.887624		10.8008	109	364.511	351.931	0.9399		10.7988	109	312.859	299.184	0.939271		10.7988	109	525.394	512.436	0.907078		10.7998	109	343.104	331.286	0.893843		10.8018	109	221.95	209.32	0.909651		10.7958	109	281.155	269.352	0.890903		10.7988	109
10.8996	110	404.69	390.48	0.941948		10.9035	110	283.374	273.36	0.90457		10.9006	110	360.322	347.742	0.928712		10.8996	110	308.826	295.151	0.926609		10.8996	110	534.153	521.195	0.922583		10.8986	110	353.041	341.223	0.920654		10.9006	110	224.62	211.99	0.921254		10.8958	110	285.1	273.297	0.903952		10.9006	110
10.9985	111	388.427	374.217	0.902717		11.0022	111	269.876	259.862	0.859904		11.0005	111	369.735	357.155	0.953852		10.9975	111	301.984	288.309	0.905129		10.9975	111	536.384	523.426	0.926532		11.0005	111	355.267	343.449	0.92666		11.0025	111	237.791	225.161	0.978492		10.9957	111	296.288	284.485	0.940957		11.0005	111
11.1003	112	396.921	382.711	0.923207		11.104	112	278.668	268.654	0.888998		11.1003	112	348.704	336.124	0.897684		11.0993	112	302.043	288.368	0.905314		11.0993	112	541.255	528.297	0.935154		11.1003	112	351.433	339.615	0.916315		11.1023	112	233.609	220.979	0.960318		11.0947	112	296.295	284.492	0.94098		11.1003	112
11.1982	113	403.724	389.514	0.939618		11.2037	113	268.788	258.774	0.856304		11.2002	113	344.321	331.741	0.885979		11.1982	113	306.146	292.471	0.918196		11.1992	113	526.846	513.888	0.909649		11.2002	113	339.687	327.869	0.884624		11.2022	113	232.141	219.511	0.953939		11.1966	113	299.187	287.384	0.950545		11.2002	113
11.3	114	398.846	384.636	0.927851		11.3024	114	270.075	260.061	0.860563		11.301	114	359.14	346.56	0.925556		11.299	114	310.254	296.579	0.931092		11.299	114	549.187	536.229	0.949195		11.3	114	342.832	331.014	0.893109		11.302	114	220.737	208.107	0.90438		11.2966	114	290.02	278.217	0.920225		11.299	114
11.3989	115	415.724	401.514	0.968565		11.4022	115	278.887	268.873	0.889722		11.3989	115	365.815	353.235	0.943383		11.3979	115	294.746	281.071	0.882406		11.3999	115	532.009	519.051	0.918788		11.3989	115	344.249	332.431	0.896932		11.4009	115	223.308	210.678	0.915553		11.3965	115	299.186	287.383	0.950542		11.4009	115
11.4987	116	404.365	390.155	0.941164		11.5029	116	286.882	276.868	0.916178		11.5007	116	358.64	346.06	0.92422		11.4997	116	301.718	288.043	0.904294		11.4977	116	546.985	534.027	0.945297		11.5007	116	355.484	343.666	0.927245		11.5027	116	224.612	211.982	0.921219		11.4965	116	287.54	275.737	0.912022		11.4987	116
11.6006	117	391.599	377.389	0.910369		11.6037	117	270.742	260.728	0.86277		11.5996	117	343.496	330.916	0.883775		11.5996	117	308.446	294.771	0.925416		11.5996	117	536.456	523.498	0.92666		11.5986	117	358.481	346.663	0.935332		11.6006	117	225.416	212.786	0.924713		11.5944	117	292.888	281.085	0.929711		11.6006	117
11.6984	118	402.378	388.168	0.936371		11.7024	118	275.338	265.324	0.877978		11.7004	118	361.888	349.308	0.932895		11.6984	118	309.068	295.393	0.927369		11.6994	118	539.172	526.214	0.931467		11.7004	118	353.391	341.573	0.921598		11.7024	118	219.806	207.176	0.900334		11.6944	118	291.62	279.817	0.925517		11.6994	118
11.7982	119	391.76	377.55	0.910757		11.8021	119	280.389	270.375	0.894693		11.8012	119	367.163	354.583	0.946983		11.7992	119	307.248	293.573	0.921655		11.7982	119	544.381	531.423	0.940688		11.7992	119	360.905	349.087	0.941872		11.8012	119	226.562	213.932	0.929694		11.7944	119	298.117	286.314	0.947006		11.7992	119
11.8991	120	394.82	380.61	0.918139		11.9029	120	285.207	275.193	0.910636		11.8991	120	343.654	331.074	0.884197		11.8981	120	313.842	300.167	0.942357		11.9001	120	550.496	537.538	0.951512		11.8991	120	356.463	344.645	0.929887		11.9011	120	232.571	219.941	0.955807		11.8963	120	290.097	278.294	0.92048		11.9011	120
11.9989	121	389.892	375.682	0.906251		12.0026	121	274.208	264.194	0.874239		12.0009	121	342.715	330.135	0.88169		11.9979	121	311.992	298.317	0.936549		11.9979	121	542.365	529.407	0.937119		11.9989	121	349.757	337.939	0.911793		12.0009	121	232.764	220.134	0.956646		11.9953	121	301.585	289.782	0.958477		11.9989	121
12.0988	122	401.652	387.442	0.934619		12.1023	122	275.885	265.871	0.879788		12.0998	122	353	340.42	0.909158		12.0998	122	309.95	296.275	0.930138		12.0998	122	547.095	534.137	0.945492		12.0988	122	354.751	342.933	0.925268		12.1008	122	216.105	203.475	0.88425		12.0952	122	284.194	272.391	0.900955		12.1008	122
12.1986	123	405.038	390.828	0.942787		12.2041	123	277.847	267.833	0.886281		12.2006	123	359.098	346.518	0.925444		12.1986	123	308.077	294.402	0.924258		12.1976	123	560.214	547.256	0.968714		12.2006	123	353.765	341.947	0.922607		12.2026	123	229.797	217.167	0.943752		12.1952	123	281.391	269.588	0.891684		12.1996	123
12.2985	124	395.628	381.418	0.920088		12.3028	124	277.309	267.295	0.884501		12.2995	124	350.182	337.602	0.901632		12.2995	124	305.14	291.465	0.915037		12.2985	124	557.046	544.088	0.963107		12.2995	124	346.979	335.161	0.904298		12.3015	124	228.859	216.229	0.939676		12.2951	124	294.15	282.347	0.933885		12.2995	124
12.3993	125	394.854	380.644	0.918221		12.4025	125	281.154	271.14	0.897224		12.3993	125	357.71	345.13	0.921737		12.3983	125	303.61	289.935	0.910234		12.3983	125	552.078	539.12	0.954313		12.3993	125	361.186	349.368	0.94263		12.4013	125	230.174	217.544	0.945391		12.3951	125	287.045	275.242	0.910385		12.3993	125
12.4992	126	400.65	386.44	0.932202		12.5033	126	283.235	273.221	0.90411		12.5012	126	355.126	342.546	0.914836		12.4982	126	300.078	286.403	0.899145		12.4982	126	549.557	536.599	0.94985		12.5012	126	344.422	332.604	0.897399		12.5012	126	226.097	213.467	0.927673		12.4951	126	286.061	274.258	0.90713		12.4992	126
12.599	127	405.297	391.087	0.943412		12.604	127	276.407	266.393	0.881516		12.6	127	354.291	341.711	0.912606		12.6	127	305.517	291.842	0.916221		12.598	127	543.972	531.014	0.939964		12.599	127	351.128	339.31	0.915493		12.601	127	226.405	213.775	0.929011		12.595	127	284.834	273.031	0.903072		12.601	127
12.6989	128	401.537	387.327	0.934342		12.7028	128	285.293	275.279	0.91092		12.7009	128	358.052	345.472	0.92265		12.6989	128	306.922	293.247	0.920632		12.6979	128	528.145	515.187	0.911948		12.6999	128	357.608	345.79	0.932976		12.7009	128	224.659	212.029	0.921424		12.695	128	291.297	279.494	0.924449		12.6999	128
12.7987	129	394.099	379.889	0.916399		12.8025	129	284.027	274.013	0.906731		12.7997	129	359.057	346.477	0.925334		12.7987	129	301.728	288.053	0.904326		12.7987	129	543.109	530.151	0.938436		12.7997	129	357.113	345.295	0.931641		12.8017	129	223.693	211.063	0.917226		12.7949	129	283.716	271.913	0.899374		12.7997	129
12.8996	130	386.803	372.593	0.898799		12.9032	130	286.498	276.484	0.914908		12.8996	130	348.608	336.028	0.897428		12.8986	130	301.492	287.817	0.903585		12.8986	130	559.349	546.391	0.967183		12.8996	130	350.12	338.302	0.912773		12.9016	130	224.427	211.797	0.920416		12.8949	130	298.083	286.28	0.946894		12.8996	130
12.9994	131	389.161	374.951	0.904488		13.003	131	277.153	267.139	0.883984		12.9994	131	367.142	354.562	0.946927		12.9984	131	298.495	284.82	0.894176		12.9984	131	561.534	548.576	0.971051		12.9994	131	360.888	349.07	0.941826		13.0014	131	225.984	213.354	0.927182		12.9958	131	286.319	274.516	0.907983		12.9994	131
13.0992	132	386.859	372.649	0.898935		13.1027	132	275.111	265.097	0.877227		13.1002	132	351.342	338.762	0.90473		13.0982	132	306.698	293.023	0.919929		13.0982	132	544.015	531.057	0.94004		13.0992	132	356.158	344.34	0.929064		13.1012	132	226.247	213.617	0.928325		13.0958	132	281.953	270.15	0.893543		13.0992	132
13.1991	133	403.611	389.401	0.939345		13.2034	133	281.547	271.533	0.898524		13.2011	133	363.903	351.323	0.938276		13.1991	133	305.659	291.984	0.916667		13.1981	133	546.39	533.432	0.944244		13.2001	133	356.715	344.897	0.930567		13.2011	133	210.29	197.66	0.85898		13.1958	133	298.037	286.234	0.946742		13.2001	133
13.2989	134	402.659	388.449	0.937049		13.3032	134	280.596	270.582	0.895377		13.2999	134	349.048	336.468	0.898603		13.2999	134	302.312	288.637	0.906159		13.2989	134	544.419	531.461	0.940755		13.2999	134	350.581	338.763	0.914017		13.3019	134	230.352	217.722	0.946164		13.2957	134	295.417	283.614	0.938076		13.2999	134
13.3998	135	418.192	403.982	0.974519		13.4029	135	269.672	259.658	0.859229		13.3998	135	353.339	340.759	0.910063		13.3988	135	304.288	290.613	0.912362		13.3988	135	538.143	525.185	0.929646		13.3998	135	358.195	346.377	0.93456		13.4018	135	236.358	223.728	0.972265		13.3957	135	299.596	287.793	0.951898		13.4018	135
13.4996	136	404.11	389.9	0.940549		13.5036	136	270.956	260.942	0.863478		13.4996	136	355.248	342.668	0.915161		13.4986	136	296.592	282.917	0.888201		13.4986	136	559.909	546.951	0.968174		13.4996	136	359.389	347.571	0.937782		13.5016	136	224.219	211.589	0.919512		13.4956	136	291.014	279.211	0.923513		13.4996	136
13.5995	137	402.072	387.862	0.935633		13.6034	137	268.864	258.85	0.856555		13.5995	137	357.039	344.459	0.919945		13.5985	137	291.045	277.37	0.870787		13.5985	137	556.233	543.275	0.961667		13.5995	137	351.963	340.145	0.917745		13.6015	137	227.425	214.795	0.933444		13.5956	137	283.825	272.022	0.899734		13.5995	137
13.6993	138	403.591	389.381	0.939297		13.7031	138	273.051	263.037	0.87041		13.7003	138	343.049	330.469	0.882582		13.6993	138	301.405	287.73	0.903311		13.6983	138	563.001	550.043	0.973648		13.7003	138	354.469	342.651	0.924507		13.7013	138	228.717	216.087	0.939059		13.6955	138	285.426	273.623	0.90503		13.7003	138
13.7992	139	403.459	389.249	0.938978		13.8019	139	281.075	271.061	0.896963		13.8002	139	364.428	351.848	0.939678		13.7992	139	304.426	290.751	0.912796		13.7992	139	542.786	529.828	0.937865		13.8002	139	357.445	345.627	0.932536		13.8022	139	231.79	219.16	0.952413		13.7955	139	298.849	287.046	0.949427		13.8002	139
13.9	140	395.742	381.532	0.920363		13.9036	140	276.773	266.759	0.882727		13.9	140	357.351	344.771	0.920778		13.899	140	307.312	293.637	0.921856		13.899	140	548.31	535.352	0.947643		13.898	140	352.046	340.228	0.917969		13.902	140	220.523	207.893	0.90345		13.8954	140	281.924	270.121	0.893447		13.9	140
13.9999	141	401.972	387.762	0.935391		14.0033	141	286.456	276.442	0.914769		13.9999	141	354.081	341.501	0.912045		13.9989	141	299.109	285.434	0.896103		13.9989	141	567.15	554.192	0.980992		13.9999	141	357.691	345.873	0.9332		14.0019	141	224.721	212.091	0.921693		13.9954	141	288.514	276.711	0.915244		13.9999	141
14.0997	142	405.144	390.934	0.943043		14.1031	142	284.71	274.696	0.908991		14.0997	142	357.013	344.433	0.919875		14.0987	142	305.655	291.98	0.916654		14.0987	142	552.854	539.896	0.955686		14.0997	142	364.709	352.891	0.952135		14.1017	142	228.355	215.725	0.937486		14.0954	142	293.751	281.948	0.932565		14.0997	142
14.1996	143	386.346	372.136	0.897697		14.2038	143	269.239	259.225	0.857796		14.2006	143	358.367	345.787	0.923491		14.1996	143	308.177	294.502	0.924572		14.1986	143	553.75	540.792	0.957272		14.2006	143	354.277	342.459	0.923989		14.2016	143	221.936	209.306	0.90959		14.1963	143	293.681	281.878	0.932334		14.1996	143
14.2994	144	396.278	382.068	0.921656		14.3015	144	266.956	256.942	0.850242		14.3004	144	356.073	343.493	0.917365		14.2994	144	305.232	291.557	0.915326		14.2994	144	542.246	529.288	0.936909		14.3004	144	350.462	338.644	0.913696		14.3024	144	230.12	217.49	0.945156		14.2963	144	284.486	272.683	0.901921		14.3004	144
14.3993	145	394.327	380.117	0.916949		14.4033	145	269.657	259.643	0.859179		14.4003	145	357.636	345.056	0.921539		14.3993	145	302.134	288.459	0.9056		14.3993	145	558.23	545.272	0.965202		14.4003	145	370.398	358.58	0.967485		14.4003	145	232.657	220.027	0.956181		14.3962	145	288.492	276.689	0.915171		14.4003	145
14.4981	146	392.336	378.126	0.912147		14.502	146	279.486	269.472	0.891704		14.5001	146	353.984	341.404	0.911786		14.4971	146	307.925	294.25	0.923781		14.4991	146	539.55	526.592	0.932136		14.5001	146	359.807	347.989	0.938909		14.5021	146	231.697	219.067	0.952009		14.4962	146	293.472	281.669	0.931643		14.5001	146
14.5999	147	403.035	388.825	0.937956		14.6037	147	277.423	267.409	0.884878		14.5999	147	360.169	347.589	0.928304		14.5989	147	286.846	273.171	0.857604		14.5989	147	548.365	535.407	0.94774		14.5999	147	354.287	342.469	0.924016		14.6019	147	234.182	221.552	0.962808		14.5941	147	290.947	279.144	0.923291		14.5999	147
14.6978	148	403.684	389.474	0.939521		14.7035	148	271.078	261.064	0.863882		14.7008	148	364.252	351.672	0.939208		14.6988	148	297.247	283.572	0.890258		14.6988	148	545.296	532.338	0.942308		14.7008	148	355.551	343.733	0.927426		14.7018	148	234.192	221.562	0.962852		14.6961	148	296.605	284.802	0.942005		14.6998	148
14.7996	149	410.452	396.242	0.955848		14.8022	149	275.47	265.456	0.878415		14.8006	149	367.048	354.468	0.946676		14.7996	149	295.222	281.547	0.8839		14.7996	149	545.518	532.56	0.942701		14.8006	149	353.965	342.147	0.923147		14.8026	149	228.137	215.507	0.936538		14.7941	149	302.323	290.52	0.960918		14.8006	149
14.8995	150	392.61	378.4	0.912808		14.904	150	267.196	257.182	0.851036		14.9005	150	356.438	343.858	0.91834		14.8995	150	289.87	276.195	0.867098		14.8995	150	543.953	530.995	0.93993		14.9005	150	347.609	335.791	0.905998		14.9025	150	217.165	204.535	0.888857		14.896	150	296.252	284.449	0.940838		14.9005	150
14.9983	151	401.042	386.832	0.933148		15.0027	151	270.551	260.537	0.862138		15.0003	151	369.581	357.001	0.95344		14.9973	151	281.714	268.039	0.841493		14.9993	151	554.249	541.291	0.958156		15.0003	151	350.35	338.532	0.913393		15.0023	151	224.336	211.706	0.92002		14.996	151	297.851	286.048	0.946126		15.0003	151
15.0982	152	408.777	394.567	0.951807		15.1044	152	270.126	260.112	0.860731		15.1002	152	361.319	348.739	0.931375		15.0992	152	296.038	282.363	0.886462		15.0992	152	537.67	524.712	0.928809		15.0992	152	353.313	341.495	0.921388		15.1012	152	219.065	206.435	0.897114		15.0949	152	303.174	291.371	0.963733		15.1002	152
15.198	153	398.205	383.995	0.926304		15.2022	153	279.48	269.466	0.891685		15.201	153	359.802	347.222	0.927324		15.198	153	296.83	283.155	0.888949		15.199	153	536.27	523.312	0.92633		15.2	153	352.049	340.231	0.917977		15.202	153	220.162	207.532	0.901881		15.1959	153	304.312	292.509	0.967497		15.2	153
15.2999	154	397.714	383.504	0.92512		15.3029	154	279.012	268.998	0.890136		15.3009	154	352.356	339.776	0.907438		15.2999	154	294.04	280.365	0.880189		15.2979	154	539.941	526.983	0.932829		15.3009	154	361.553	349.735	0.94362		15.3029	154	225.877	213.247	0.926717		15.2948	154	312.829	301.026	0.995667		15.3009	154
15.3987	155	403.24	389.03	0.93845		15.4026	155	282.996	272.982	0.903319		15.3987	155	368.832	356.252	0.95144		15.3977	155	299.023	285.348	0.895833		15.3997	155	530.609	517.651	0.91631		15.3987	155	361.228	349.41	0.942743		15.4007	155	225.477	212.847	0.924979		15.3968	155	300.938	289.135	0.956337		15.4007	155
15.4986	156	384.743	370.533	0.89383		15.5024	156	266.504	256.49	0.848746		15.5006	156	372.203	359.623	0.960443		15.4976	156	287.237	273.562	0.858832		15.4996	156	533.093	520.135	0.920707		15.5006	156	362.79	350.972	0.946958		15.5006	156	223.484	210.854	0.916317		15.4948	156	293.151	281.348	0.930581		15.4986	156
15.6004	157	398.818	384.608	0.927783		15.6041	157	259.038	249.024	0.82404		15.5994	157	365.778	353.198	0.943284		15.5994	157	294.733	281.058	0.882365		15.5994	157	542.165	529.207	0.936765		15.5994	157	360.045	348.227	0.939551		15.6014	157	214.058	201.428	0.875355		15.5947	157	308.983	297.18	0.982946		15.6004	157
15.6983	158	402.462	388.252	0.936573		15.7028	158	274.173	264.159	0.874123		15.7013	158	357.272	344.692	0.920567		15.6983	158	302.085	288.41	0.905446		15.6983	158	534.871	521.913	0.923854		15.7003	158	357.166	345.348	0.931784		15.7023	158	228.459	215.829	0.937938		15.6967	158	292.037	280.234	0.926896		15.6993	158
15.7991	159	416.363	402.153	0.970107		15.8026	159	271.916	261.902	0.866655		15.7991	159	353.181	340.601	0.909641		15.8001	159	303.382	289.707	0.909518		15.7981	159	533.423	520.465	0.921291		15.8011	159	362.235	350.417	0.94546		15.8011	159	218.07	205.44	0.89279		15.7946	159	304.049	292.246	0.966627		15.7991	159
15.8989	160	384.809	370.599	0.893989		15.9023	160	269.24	259.226	0.8578		15.8989	160	345.598	333.018	0.889389		15.8999	160	294.426	280.751	0.881401		15.8979	160	551.081	538.123	0.952548		15.8989	160	355.776	343.958	0.928033		15.9009	160	226.841	214.211	0.930906		15.8946	160	294.484	282.681	0.93499		15.9009	160
15.9988	161	398.81	384.6	0.927764		16.003	161	280.865	270.851	0.896268		15.9998	161	349.192	336.612	0.898988		15.9978	161	290.437	276.762	0.868878		15.9978	161	547.326	534.368	0.945901		15.9988	161	367.004	355.186	0.958328		16.0008	161	231.116	218.486	0.949484		15.9945	161	298.281	286.478	0.947549		16.0008	161
16.0986	162	412.335	398.125	0.96039		16.1048	162	278.408	268.394	0.888137		16.1006	162	352.982	340.402	0.90911		16.0986	162	293.018	279.343	0.876981		16.0996	162	528.652	515.694	0.912846		16.0996	162	362.803	350.985	0.946993		16.1006	162	227.509	214.879	0.933809		16.0955	162	298.117	286.314	0.947006		16.1006	162
16.1985	163	391.705	377.495	0.910624		16.2025	163	273.889	263.875	0.873183		16.2015	163	376.822	364.242	0.972779		16.1985	163	298.838	285.163	0.895253		16.1985	163	531.256	518.298	0.917455		16.1995	163	360.995	349.177	0.942115		16.2025	163	232.268	219.638	0.954491		16.1955	163	282.089	270.286	0.893992		16.1995	163
16.2993	164	411.929	397.719	0.95941		16.3033	164	272.19	262.176	0.867561		16.2993	164	361.273	348.693	0.931252		16.3003	164	295.309	281.634	0.884173		16.2983	164	541.263	528.305	0.935169		16.2993	164	362.421	350.603	0.945962		16.3013	164	244.908	232.278	1.00942		16.2954	164	299.52	287.717	0.951647		16.2993	164
16.3992	165	395.484	381.274	0.91974		16.403	165	278.254	268.24	0.887628		16.3992	165	360.665	348.085	0.929629		16.4002	165	296.321	282.646	0.887351		16.4002	165	518.006	505.048	0.894001		16.3992	165	365.395	353.577	0.953986		16.4012	165	227.426	214.796	0.933448		16.3964	165	292.549	280.746	0.92859		16.4012	165
16.499	166	409.343	395.133	0.953172		16.5027	166	278.578	268.564	0.8887		16.5	166	358.396	345.816	0.923569		16.498	166	301.282	287.607	0.902925		16.498	166	527.733	514.775	0.911219		16.499	166	363.786	351.968	0.949645		16.503	166	226.129	213.499	0.927812		16.4953	166	305.242	293.439	0.970573		16.499	166
16.5989	167	398.293	384.083	0.926517		16.6025	167	270.95	260.936	0.863458		16.5999	167	353.604	341.024	0.910771		16.5989	167	301.908	288.233	0.904891		16.5979	167	538.963	526.005	0.931097		16.5999	167	365.669	353.851	0.954726		16.6009	167	234.224	221.594	0.962991		16.5953	167	301.16	289.357	0.957071		16.6009	167
16.6987	168	411.558	397.348	0.958516		16.7032	168	268.055	258.041	0.853878		16.7017	168	355.903	343.323	0.916911		16.6987	168	289.908	276.233	0.867217		16.6987	168	549.035	536.077	0.948926		16.7007	168	352.457	340.639	0.919078		16.7017	168	231.254	218.624	0.950084		16.6952	168	295.746	283.943	0.939164		16.6997	168
16.7996	169	410.064	395.854	0.954912		16.8029	169	267.671	257.657	0.852608		16.7996	169	361.646	349.066	0.932248		16.8006	169	294.103	280.428	0.880387		16.7986	169	535.995	523.037	0.925844		16.7996	169	354.178	342.36	0.923722		16.8016	169	226.23	213.6	0.928251		16.7952	169	306.614	294.811	0.975111		16.7996	169
16.8994	170	419.382	405.172	0.977389		16.9027	170	272.893	262.879	0.869888		16.8994	170	360.475	347.895	0.929121		16.8984	170	287.055	273.38	0.85826		16.8984	170	536.606	523.648	0.926925		16.8994	170	352.323	340.505	0.918717		16.9014	170	226.738	214.108	0.930459		16.8951	170	292.929	281.126	0.929847		16.8994	170
16.9993	171	403.066	388.856	0.93803		17.0034	171	277.819	267.805	0.886188		17.0003	171	351.335	338.755	0.904711		16.9983	171	290.476	276.801	0.869001		16.9983	171	549.472	536.514	0.9497		16.9993	171	363.832	352.014	0.949769		17.0013	171	234.942	222.312	0.966111		16.9951	171	292.128	280.325	0.927197		16.9993	171
17.0991	172	400.477	386.267	0.931785		17.1031	172	275.328	265.314	0.877945		17.1001	172	352.981	340.401	0.909107		17.0991	172	290.4	276.725	0.868762		17.1001	172	535.009	522.051	0.924098		17.1001	172	357.834	346.016	0.933586		17.1011	172	232.577	219.947	0.955833		17.0951	172	296.763	284.96	0.942528		17.1001	172
17.1989	173	398.933	384.723	0.92806		17.2029	173	283.396	273.382	0.904643		17.2	173	365.129	352.549	0.941551		17.1989	173	297.788	284.113	0.891956		17.1989	173	539.291	526.333	0.931678		17.2	173	372.842	361.024	0.974079		17.202	173	229.528	216.898	0.942583		17.195	173	294.587	282.784	0.935331		17.2	173
17.2998	174	401.641	387.431	0.934593		17.3036	174	275.133	265.119	0.8773		17.2998	174	361.038	348.458	0.930625		17.2988	174	298.796	285.121	0.895121		17.2988	174	547.726	534.768	0.946609		17.2998	174	362.705	350.887	0.946728		17.3018	174	227.891	215.261	0.935469		17.296	174	292.352	280.549	0.927938		17.2998	174
17.3996	175	409.707	395.497	0.95405		17.4034	175	272.764	262.75	0.869461		17.3996	175	368.087	355.507	0.94945		17.3986	175	288.668	274.993	0.863324		17.3986	175	541.799	528.841	0.936117		17.3996	175	366.317	354.499	0.956474		17.4016	175	219.411	206.781	0.898617		17.3959	175	307.621	295.818	0.978442		17.3996	175
17.4995	176	402.058	387.848	0.935599		17.5031	176	277.788	267.774	0.886086		17.4995	176	358.511	345.931	0.923876		17.4985	176	295.775	282.1	0.885636		17.4985	176	543.253	530.295	0.938691		17.4995	176	361.851	350.033	0.944424		17.5015	176	226.136	213.506	0.927842		17.4959	176	295.148	283.345	0.937186		17.4995	176
17.5993	177	399.56	385.35	0.929573		17.6038	177	276.742	266.728	0.882624		17.6003	177	352.255	339.675	0.907168		17.5993	177	303.264	289.589	0.909148		17.5983	177	555.173	542.215	0.959791		17.6003	177	361.06	349.242	0.94229		17.6013	177	216.573	203.943	0.886284		17.5958	177	301.473	289.67	0.958107		17.6003	177
17.6992	178	403.621	389.411	0.939369		17.7036	178	285.223	275.209	0.910689		17.7002	178	351.702	339.122	0.905691		17.6992	178	296.392	282.717	0.887573		17.6992	178	539.307	526.349	0.931706		17.7002	178	358.836	347.018	0.936289		17.7022	178	220.606	207.976	0.90381		17.6958	178	291.228	279.425	0.92422		17.7002	178
17.8	179	411.923	397.713	0.959396		17.8023	179	262.584	252.57	0.835774		17.8	179	354.074	341.494	0.912026		17.799	179	292.129	278.454	0.87419		17.799	179	560.153	547.195	0.968606		17.8	179	364.499	352.681	0.951569		17.802	179	224.073	211.443	0.918877		17.7958	179	313.21	301.407	0.996928		17.8	179
17.8999	180	405.422	391.212	0.943714		17.903	180	287.593	277.579	0.918531		17.8999	180	344.951	332.371	0.887661		17.8989	180	294.738	281.063	0.882381		17.8989	180	535.855	522.897	0.925596		17.8999	180	352.688	340.87	0.919702		17.9019	180	221.334	208.704	0.906974		17.8957	180	309.423	297.62	0.984402		17.8999	180
17.9977	181	404.881	390.671	0.942409		18.0038	181	268.265	258.251	0.854573		17.9997	181	357.002	344.422	0.919846		17.9987	181	291.082	277.407	0.870903		17.9987	181	550.594	537.636	0.951686		17.9997	181	345.942	334.124	0.9015		18.0017	181	214.1	201.47	0.875537		17.9957	181	300.013	288.21	0.953277		17.9997	181
18.0996	182	395.888	381.678	0.920715		18.1035	182	266.629	256.615	0.84916		18.1006	182	373.141	360.561	0.962948		18.0996	182	293.125	279.45	0.877317		18.0986	182	554.382	541.424	0.958391		18.1006	182	366.289	354.471	0.956398		18.1016	182	222.877	210.247	0.91368		18.0946	182	294.869	283.066	0.936263		18.0996	182
18.1984	183	412.018	397.808	0.959625		18.2032	183	276.787	266.773	0.882773		18.2004	183	360.12	347.54	0.928173		18.1994	183	298.414	284.739	0.893921		18.1994	183	557.994	545.036	0.964785		18.2004	183	359.987	348.169	0.939395		18.2024	183	214.739	202.109	0.878314		18.1956	183	292.627	280.824	0.928848		18.2004	183
18.2993	184	396.668	382.458	0.922597		18.302	184	269.212	259.198	0.857707		18.3003	184	362.632	350.052	0.934882		18.2993	184	314.985	301.31	0.945945		18.2993	184	542.992	530.034	0.938229		18.3003	184	360.837	349.019	0.941688		18.3023	184	216.23	203.6	0.884793		18.2955	184	302.188	290.385	0.960471		18.3003	184
18.4001	185	408.177	393.967	0.95036		18.4037	185	269.507	259.493	0.858683		18.4001	185	348.411	335.831	0.896902		18.3991	185	294.855	281.18	0.882748		18.3991	185	548.026	535.068	0.94714		18.4001	185	353.972	342.154	0.923166		18.4021	185	226.344	213.714	0.928746		18.3955	185	291.028	279.225	0.923559		18.4001	185
18.498	186	414.419	400.209	0.965417		18.5035	186	273.984	263.97	0.873498		18.5	186	360.968	348.388	0.930438		18.499	186	304.058	290.383	0.91164		18.499	186	541.094	528.136	0.934869		18.5	186	358.099	346.281	0.934301		18.502	186	230.456	217.826	0.946616		18.4965	186	297.802	285.999	0.945964		18.5	186
18.5998	187	405.335	391.125	0.943504		18.6042	187	267.604	257.59	0.852386		18.6008	187	365.052	352.472	0.941345		18.5988	187	299.353	285.678	0.896869		18.5988	187	550.362	537.404	0.951275		18.5988	187	360.196	348.378	0.939959		18.6018	187	228.816	216.186	0.939489		18.5944	187	295.72	283.917	0.939078		18.5998	187
18.6986	188	419.134	404.924	0.976791		18.7039	188	271.032	261.018	0.863729		18.7006	188	345.88	333.3	0.890142		18.6996	188	302.328	288.653	0.906209		18.6996	188	546.397	533.439	0.944256		18.7006	188	352.159	340.341	0.918274		18.7026	188	233.114	220.484	0.958167		18.6964	188	296.041	284.238	0.94014		18.7006	188
18.7995	189	398.856	384.646	0.927875		18.8027	189	279.242	269.228	0.890897		18.8005	189	358.3	345.72	0.923312		18.7995	189	303.978	290.303	0.911389		18.7975	189	540.658	527.7	0.934098		18.8005	189	353.892	342.074	0.92295		18.8025	189	234.907	222.277	0.965959		18.7943	189	301.872	290.069	0.959426		18.7985	189
18.9003	190	394.827	380.617	0.918156		18.9024	190	265.719	255.705	0.846148		18.8993	190	368.706	356.126	0.951104		18.8993	190	297.188	283.513	0.890072		18.8993	190	538.254	525.296	0.929842		18.8983	190	365.956	354.138	0.9555		18.9003	190	228.111	215.481	0.936425		18.8963	190	301.376	289.573	0.957786		18.9003	190
18.9982	191	405.828	391.618	0.944693		19.0021	191	278.372	268.358	0.888018		19.0002	191	366.708	354.128	0.945768		18.9992	191	293.943	280.268	0.879885		18.9992	191	533.802	520.844	0.921962		19.0002	191	344.079	332.261	0.896474		19.0022	191	229.823	217.193	0.943865		18.9962	191	296.266	284.463	0.940884		19.0002	191
19.1	192	415	400.79	0.966819		19.1039	192	276.859	266.845	0.883011		19.101	192	359.428	346.848	0.926325		19.099	192	286.902	273.227	0.85778		19.099	192	541.069	528.111	0.934825		19.099	192	364.173	352.355	0.950689		19.101	192	225.295	212.665	0.924188		19.0942	192	292.03	280.227	0.926873		19.1	192
19.1999	193	399.985	385.775	0.930598		19.2036	193	268.196	258.182	0.854345		19.2009	193	366.099	353.519	0.944141		19.1979	193	297.117	283.442	0.88985		19.1999	193	540.982	528.024	0.934671		19.2009	193	352.231	340.413	0.918469		19.2029	193	227.596	214.966	0.934187		19.1962	193	306.999	295.196	0.976384		19.2009	193
19.2997	194	401.305	387.095	0.933782		19.3023	194	271.295	261.281	0.8646		19.3007	194	355.368	342.788	0.915482		19.2997	194	308.172	294.497	0.924556		19.2997	194	532.722	519.764	0.92005		19.3007	194	368.42	356.602	0.962148		19.3027	194	222.653	210.023	0.912706		19.2951	194	297.161	285.358	0.943844		19.3007	194
19.3986	195	400.023	385.813	0.93069		19.4021	195	278.966	268.952	0.889984		19.3996	195	347.847	335.267	0.895396		19.3996	195	299.905	286.23	0.898602		19.3996	195	526.825	513.867	0.909611		19.3986	195	369.002	357.184	0.963718		19.4006	195	223.916	211.286	0.918195		19.3961	195	299.56	287.757	0.951779		19.4006	195
19.4984	196	401.038	386.828	0.933138		19.5028	196	267.127	257.113	0.850807		19.5004	196	370.375	357.795	0.955561		19.4984	196	301.482	287.807	0.903553		19.4984	196	539.596	526.638	0.932218		19.5004	196	359.305	347.487	0.937555		19.5024	196	226.724	214.094	0.930398		19.495	196	296.864	285.061	0.942862		19.4994	196
19.6003	197	396.604	382.394	0.922442		19.6025	197	277.68	267.666	0.885728		19.5993	197	351.008	338.428	0.903838		19.5983	197	300.917	287.242	0.901779		19.5993	197	535.571	522.613	0.925093		19.5993	197	362.507	350.689	0.946194		19.6013	197	222.875	210.245	0.913671		19.595	197	300.365	288.562	0.954442		19.6003	197
19.6991	198	404.701	390.491	0.941974		19.7023	198	275.924	265.91	0.879917		19.7011	198	352.819	340.239	0.908674		19.6981	198	293.558	279.883	0.878676		19.6981	198	535.689	522.731	0.925302		19.6991	198	360.906	349.088	0.941875		19.7031	198	220.962	208.332	0.905358		19.6949	198	294.915	283.112	0.936415		19.7011	198
19.799	199	397.7	383.49	0.925086		19.803	199	283.608	273.594	0.905344		19.801	199	353.463	340.883	0.910394		19.8	199	303.678	290.003	0.910447		19.798	199	540.392	527.434	0.933627		19.799	199	361.463	349.645	0.943377		19.803	199	227.452	214.822	0.933561		19.7949	199	290.414	278.611	0.921528		19.799	199
19.8988	200	400.253	386.043	0.931245		19.9028	200	270.208	260.194	0.861003		19.8998	200	371.54	358.96	0.958672		19.8978	200	294.642	280.967	0.882079		19.8978	200	542.957	529.999	0.938167		19.8988	200	350.569	338.751	0.913984		19.9008	200	221.731	209.101	0.908699		19.8948	200	311.878	300.075	0.992522		19.9008	200
[truncated: 17 more columns]

## Sheet: 2J 1hUV
Cell 00						Cell 01						Cell 02						Cell 03						Cell 04						Cell 05						Cell 06						Cell 07						Cell 08
	paste BG		average pre-bleach				paste BG		average pre-bleach				paste BG		average pre-bleach				paste BG		average pre-bleach				paste BG		average pre-bleach				paste BG		average pre-bleach				paste BG		average pre-bleach				paste BG		average pre-bleach				paste BG
	1	11.521	425.14				1	14.146	330.969				1	10.71	321.164				1	15.171	491.104				1	15.646	607.297				1	14.271	477.341				1	14.138	342.992				1	14.916	724.403				1
	paste FRAP	RAW					paste FRAP	RAW					paste FRAP	RAW					paste FRAP	RAW					paste FRAP	RAW					paste FRAP	RAW					paste FRAP	RAW					paste FRAP	RAW					paste FRAP
Time	data here		minus BG	Normalized		Time	data here		minus BG	Normalized		Time	data here		minus BG	Normalized		Time	data here		minus BG	Normalized		Time	data here		minus BG	Normalized		Time	data here		minus BG	Normalized		Time	data here		minus BG	Normalized		Time	data here		minus BG	Normalized		Time	data here
0	1	479.102	467.581	1.09983		0	1	374.878	360.732	1.08993		0	1	341.592	330.882	1.03026		0	1	539.235	524.064	1.06711		0	1	658.057	642.411	1.05782		0	1	535.378	521.107	1.09169		0	1	381.692	367.554	1.07161		0	1	773.839	758.923	1.04765		0	1
0.0798342	2	453.324	441.803	1.03919		0.0798342	2	352.964	338.818	1.02371		0.0817251	2	336.385	325.675	1.01405		0.0798342	2	539.755	524.584	1.06817		0.0817251	2	648.944	633.298	1.04281		0.0798342	2	522.731	508.46	1.06519		0.0798342	2	388.382	374.244	1.09111		0.0798342	2	767.957	753.041	1.03953		0.0798342	2
0.171676	3	445.77	434.249	1.02143		0.171676	3	360.274	346.128	1.0458		0.168453	3	332.072	321.362	1.00062		0.170675	3	545.353	530.182	1.07957		0.169454	3	642.419	626.773	1.03207		0.171676	3	508.707	494.436	1.03581		0.171676	3	377.236	363.098	1.05862		0.170675	3	757.789	742.873	1.0255		0.171676	3
0.271522	4	440.445	428.924	1.0089		0.271522	4	345.773	331.627	1.00199		0.272192	4	326.912	316.202	0.984551		0.270521	4	515.992	500.821	1.01979		0.271191	4	647.797	632.151	1.04092		0.271522	4	508.06	493.789	1.03446		0.270521	4	370.447	356.309	1.03883		0.270521	4	774.269	759.353	1.04825		0.272523	4
0.372369	5	446.175	434.654	1.02238		0.371368	5	345.71	331.564	1.0018		0.369926	5	341.681	330.971	1.03054		0.370368	5	504.66	489.489	0.996711		0.371928	5	649.189	633.543	1.04322		0.371368	5	493.35	479.079	1.00364		0.370368	5	371.637	357.499	1.04229		0.372369	5	752.661	737.745	1.01842		0.370368	5
0.470214	6	436.281	424.76	0.999106		0.471215	6	347.182	333.036	1.00624		0.470663	6	332.057	321.347	1.00057		0.471215	6	513.214	498.043	1.01413		0.471664	6	643.122	627.476	1.03323		0.471215	6	495.888	481.617	1.00896		0.470214	6	367.146	353.008	1.0292		0.470214	6	759.239	744.323	1.0275		0.472215	6
0.572061	7	453.855	442.334	1.04044		0.571061	7	351.295	337.149	1.01867		0.570399	7	331.484	320.774	0.998786		0.571061	7	506.769	491.598	1.00101		0.5714	7	635.451	619.805	1.0206		0.57006	7	494.409	480.138	1.00586		0.57006	7	357.586	343.448	1.00133		0.572061	7	739.731	724.815	1.00057		0.572061	7
0.670907	8	433.992	422.471	0.993722		0.671908	8	339.525	325.379	0.98311		0.670135	8	331.419	320.709	0.998584		0.670907	8	508.108	492.937	1.00373		0.671136	8	627.361	611.715	1.00727		0.671908	8	487.22	472.949	0.990799		0.669907	8	361.799	347.661	1.01361		0.670907	8	745.877	730.961	1.00905		0.670907	8
0.770753	9	436.119	424.598	0.998725		0.771754	9	349.884	335.738	1.01441		0.771872	9	334.195	323.485	1.00723		0.770753	9	509.315	494.144	1.00619		0.769871	9	621.012	605.366	0.99682		0.769753	9	489.715	475.444	0.996025		0.770753	9	365.219	351.081	1.02358		0.770753	9	737.235	722.319	0.997123		0.772755	9
0.872601	10	448.618	437.097	1.02812		0.8716	10	337.967	323.821	0.978402		0.870608	10	328.878	318.168	0.990672		0.8706	10	516.239	501.068	1.02029		0.871608	10	630.414	614.768	1.0123		0.8716	10	487.332	473.061	0.991033		0.8706	10	364.764	350.626	1.02226		0.872601	10	745.521	730.605	1.00856		0.872601	10
0.970446	11	430.267	418.746	0.98496		0.971447	11	347.007	332.861	1.00572		0.970344	11	342.126	331.416	1.03192		0.971447	11	499.438	484.267	0.986078		0.970344	11	632.729	617.083	1.01611		0.971447	11	494.287	480.016	1.0056		0.970446	11	360.513	346.375	1.00986		0.970446	11	741.932	727.016	1.00361		0.972447	11
1.07229	12	435.974	424.453	0.998384		1.07129	12	346.12	331.974	1.00304		1.07008	12	328.595	317.885	0.989791		1.07129	12	524.9	509.729	1.03792		1.07208	12	627.034	611.388	1.00674		1.07129	12	493.595	479.324	1.00415		1.07029	12	355.834	341.696	0.996221		1.07229	12	748.415	733.499	1.01256		1.07229	12
1.17114	13	442.109	430.588	1.01281		1.17214	13	339.328	325.182	0.982514		1.17082	13	330.205	319.495	0.994804		1.17114	13	501.033	485.862	0.989325		1.17182	13	609.847	594.201	0.978435		1.17214	13	483.835	469.564	0.983707		1.17014	13	356.459	342.321	0.998043		1.17114	13	749.109	734.193	1.01351		1.17114	13
1.27099	14	445.596	434.075	1.02102		1.27199	14	351.551	337.405	1.01945		1.27255	14	332.48	321.77	1.00189		1.27099	14	503.272	488.101	0.993885		1.27055	14	654.453	638.807	1.05188		1.27199	14	480.25	465.979	0.976197		1.27099	14	368.305	354.167	1.03258		1.27099	14	730.687	715.771	0.988084		1.27099	14
1.37283	15	442.553	431.032	1.01386		1.37183	15	352.832	338.686	1.02332		1.37029	15	330.822	320.112	0.996725		1.37083	15	505.293	490.122	0.998		1.37229	15	606.364	590.718	0.9727		1.37183	15	508.752	494.481	1.03591		1.37083	15	351.131	336.993	0.982509		1.37083	15	739.31	724.394	0.999987		1.37083	15
1.47068	16	441.837	430.316	1.01217		1.47168	16	352.923	338.777	1.02359		1.47102	16	330.268	319.558	0.995		1.47168	16	509.129	493.958	1.00581		1.47002	16	623.012	607.366	1.00011		1.47168	16	482.414	468.143	0.98073		1.47068	16	363.129	348.991	1.01749		1.47068	16	731.495	716.579	0.989199		1.47268	16
1.57052	17	435.985	424.464	0.998409		1.57052	17	343.28	329.134	0.994455		1.57176	17	326.015	315.305	0.981758		1.57153	17	499.2	484.029	0.985593		1.57176	17	624.404	608.758	1.0024		1.57052	17	503.167	488.896	1.02421		1.57052	17	354.58	340.442	0.992565		1.57153	17	735.869	720.953	0.995237		1.57153	17
1.67137	18	423.579	412.058	0.969229		1.67237	18	333.942	319.796	0.966241		1.6705	18	328.675	317.965	0.99004		1.67137	18	504.746	489.575	0.996886		1.6705	18	630.358	614.712	1.01221		1.67037	18	498.103	483.832	1.0136		1.67037	18	348.429	334.291	0.974631		1.67137	18	738.785	723.869	0.999263		1.67137	18
1.77122	19	436.814	425.293	1.00036		1.77222	19	347.148	333.002	1.00614		1.77023	19	338.707	327.997	1.02128		1.77122	19	503.139	487.968	0.993614		1.77023	19	606.542	590.896	0.972993		1.77022	19	482.439	468.168	0.980783		1.77122	19	357.847	343.709	1.00209		1.77122	19	736.715	721.799	0.996405		1.77122	19
1.87106	20	431.898	420.377	0.988796		1.87006	20	337.021	322.875	0.975544		1.87097	20	330.845	320.135	0.996797		1.87106	20	512.603	497.432	1.01288		1.87097	20	614.692	599.046	0.986413		1.87206	20	489.28	475.009	0.995114		1.87106	20	355.076	340.938	0.994011		1.87106	20	740.874	725.958	1.00215		1.87106	20
2.03032	21	295.37	283.849	0.66766		2.02932	21	238.285	224.139	0.67722		2.034	21	245.732	235.022	0.731782		2.03032	21	356.97	341.799	0.69598		2.034	21	429.163	413.517	0.680913		2.03132	21	350.023	335.752	0.703379		2.03032	21	241.117	226.979	0.661761		2.03032	21	482.527	467.611	0.645512		2.03032	21
2.11015	22	333.503	321.982	0.757355		2.10915	22	264.172	250.026	0.755436		2.11573	22	258.949	248.239	0.772936		2.11015	22	380.18	365.009	0.743241		2.11573	22	456.104	440.458	0.725276		2.11115	22	367.668	353.397	0.740345		2.11015	22	266.781	252.643	0.736585		2.11015	22	516.857	501.941	0.692903		2.11015	22
2.19899	23	329.361	317.84	0.747612		2.19799	23	266.518	252.372	0.762524		2.20146	23	264.893	254.183	0.791443		2.19899	23	394.615	379.444	0.772634		2.20146	23	489.367	473.721	0.780048		2.19999	23	375.279	361.008	0.756289		2.19999	23	282.474	268.336	0.782338		2.19899	23	544.086	529.17	0.730491		2.19899	23
2.29884	24	341.452	329.931	0.776052		2.29784	24	283.82	269.674	0.814801		2.30319	24	267.513	256.803	0.799601		2.29884	24	406.995	391.824	0.797843		2.30319	24	478.134	462.488	0.761551		2.29984	24	392.747	378.476	0.792884		2.29984	24	283.849	269.711	0.786347		2.29884	24	546.665	531.749	0.734051		2.29884	24
2.39868	25	346.083	334.562	0.786945		2.39768	25	286.062	271.916	0.821575		2.40293	25	268.444	257.734	0.8025		2.39868	25	411.428	396.257	0.806869		2.40293	25	500.845	485.199	0.798948		2.39968	25	402.211	387.94	0.81271		2.39968	25	299.646	285.508	0.832404		2.39868	25	581.104	566.188	0.781592		2.39868	25
2.49853	26	354.825	343.304	0.807508		2.49853	26	280.852	266.706	0.805833		2.50367	26	279.362	268.652	0.836495		2.49953	26	431.989	416.818	0.848736		2.50267	26	502.62	486.974	0.801871		2.49953	26	392.262	377.991	0.791868		2.50053	26	295.742	281.604	0.821021		2.49853	26	589.775	574.859	0.793562		2.49853	26
2.59838	27	347.463	335.942	0.790191		2.59838	27	297.708	283.562	0.856763		2.6034	27	288.381	277.671	0.864578		2.59938	27	441.115	425.944	0.867319		2.6034	27	521.472	505.826	0.832913		2.59938	27	410.899	396.628	0.830911		2.60038	27	313.688	299.55	0.873343		2.59938	27	608.282	593.366	0.81911		2.59737	27
2.69922	28	345.854	334.333	0.786406		2.69822	28	301.155	287.009	0.867177		2.70314	28	298.598	287.888	0.89639		2.69922	28	434.053	418.882	0.852939		2.70114	28	528.029	512.383	0.84371		2.70022	28	408.463	394.192	0.825808		2.70022	28	314.509	300.371	0.875737		2.69922	28	580.421	565.505	0.78065		2.69922	28
2.79907	29	367.035	355.514	0.836228		2.79707	29	295.943	281.797	0.85143		2.80387	29	297.464	286.754	0.892859		2.79907	29	434.242	419.071	0.853324		2.80287	29	520.675	505.029	0.831601		2.80007	29	412.597	398.326	0.834468		2.79907	29	300.037	285.899	0.833543		2.79907	29	596.708	581.792	0.803133		2.79707	29
2.89891	30	364.433	352.912	0.830107		2.89791	30	293.305	279.159	0.843459		2.90361	30	287.05	276.34	0.860433		2.89891	30	430.256	415.085	0.845207		2.90361	30	541.589	525.943	0.866038		2.89992	30	414.031	399.76	0.837472		2.89992	30	315.884	301.746	0.879746		2.89891	30	614.072	599.156	0.827103		2.89891	30
2.99876	31	377.324	365.803	0.860429		2.99876	31	298.428	284.282	0.858938		3.00235	31	288.753	278.043	0.865736		2.99776	31	436.145	420.974	0.857199		3.00335	31	536.04	520.394	0.856901		2.99976	31	426.31	412.039	0.863196		3.00076	31	312.242	298.104	0.869127		2.99876	31	613.201	598.285	0.825901		2.99876	31
3.09761	32	378.654	367.133	0.863557		3.09861	32	299.758	285.612	0.862956		3.10308	32	297.484	286.774	0.892921		3.09961	32	449.349	434.178	0.884085		3.10308	32	539.983	524.337	0.863394		3.09961	32	422.542	408.271	0.855302		3.10061	32	317.204	303.066	0.883594		3.09961	32	614.024	599.108	0.827037		3.09761	32
3.19945	33	374.846	363.325	0.8546		3.19845	33	297.554	283.408	0.856297		3.20382	33	299.945	289.235	0.900584		3.19945	33	453.972	438.801	0.893499		3.20282	33	551.209	535.563	0.881879		3.20046	33	419.611	405.34	0.849162		3.20046	33	306.867	292.729	0.853456		3.19945	33	636.395	621.479	0.857919		3.19945	33
3.2993	34	389.284	377.763	0.888561		3.2973	34	310.954	296.808	0.896784		3.30356	34	304.02	293.31	0.913272		3.2993	34	460.315	445.144	0.906414		3.30356	34	534.459	518.813	0.854298		3.2983	34	428.812	414.541	0.868438		3.3003	34	321.218	307.08	0.895297		3.2973	34	618.079	603.163	0.832634		3.2993	34
3.39915	35	388.317	376.796	0.886286		3.39815	35	293.233	279.087	0.843242		3.40329	35	303.044	292.334	0.910233		3.39915	35	442.245	427.074	0.86962		3.40129	35	534.183	518.537	0.853843		3.40015	35	420.581	406.31	0.851194		3.40015	35	321.434	307.296	0.895927		3.39915	35	639.576	624.66	0.86231		3.39915	35
3.49899	36	389.414	377.893	0.888867		3.49899	36	309.097	294.951	0.891174		3.50203	36	296.234	285.524	0.889029		3.49799	36	443.404	428.233	0.87198		3.50303	36	540.623	524.977	0.864448		3.49899	36	426.039	411.768	0.862628		3.49899	36	307.529	293.391	0.855387		3.49899	36	644.248	629.332	0.868759		3.49799	36
3.59784	37	386.817	375.296	0.882758		3.59884	37	314.252	300.106	0.906749		3.60376	37	298.261	287.551	0.895341		3.59984	37	458.364	443.193	0.902442		3.60376	37	546.777	531.131	0.874581		3.59984	37	435.446	421.175	0.882335		3.60084	37	316.899	302.761	0.882705		3.59884	37	644.135	629.219	0.868603		3.59784	37
3.69969	38	397.597	386.076	0.908115		3.69869	38	314.373	300.227	0.907115		3.7025	38	298.167	287.457	0.895048		3.69769	38	456.558	441.387	0.898764		3.7015	38	545.704	530.058	0.872814		3.69869	38	424.244	409.973	0.858868		3.70069	38	317.04	302.902	0.883116		3.69969	38	647.387	632.471	0.873093		3.69969	38
3.79753	39	389.832	378.311	0.88985		3.79853	39	302.443	288.297	0.871069		3.80424	39	300.287	289.577	0.901649		3.79953	39	442.875	427.704	0.870903		3.80324	39	549.59	533.944	0.879213		3.79853	39	429.66	415.389	0.870214		3.79953	39	321.229	307.091	0.895329		3.79753	39	641.47	626.554	0.864925		3.79753	39
3.89938	40	394.693	383.172	0.901284		3.89838	40	314.773	300.627	0.908323		3.90397	40	300.925	290.215	0.903635		3.89838	40	452.169	436.998	0.889827		3.90197	40	554.305	538.659	0.886977		3.90038	40	420.202	405.931	0.8504		3.90038	40	320.219	306.081	0.892384		3.89938	40	658.19	643.274	0.888006		3.89838	40
3.99822	41	381.12	369.599	0.869358		3.99722	41	305.386	291.24	0.879961		4.00271	41	306.108	295.398	0.919774		3.99822	41	459.125	443.954	0.903991		4.00371	41	550.716	535.07	0.881067		4.00023	41	441.86	427.589	0.895772		4.00123	41	310.563	296.425	0.864232		3.99822	41	648.657	633.741	0.874846		3.99923	41
4.09807	42	401.486	389.965	0.917262		4.09907	42	315.563	301.417	0.91071		4.10445	42	308.352	297.642	0.926761		4.10007	42	441.109	425.938	0.867307		4.10344	42	534.564	518.918	0.854471		4.10007	42	443.251	428.98	0.898686		4.10107	42	327.933	313.795	0.914875		4.09907	42	643.915	628.999	0.8683		4.09807	42
4.19992	43	390.816	379.295	0.892165		4.19692	43	313.844	299.698	0.905516		4.20418	43	294.051	283.341	0.882232		4.19792	43	460.093	444.922	0.905962		4.20218	43	536.361	520.715	0.85743		4.19892	43	420.036	405.765	0.850052		4.19892	43	307.067	292.929	0.85404		4.19792	43	655.016	640.1	0.883624		4.19792	43
4.29776	44	399.406	387.885	0.91237		4.29676	44	308.471	294.325	0.889282		4.30392	44	299.566	288.856	0.899404		4.29976	44	457.45	442.279	0.900581		4.30392	44	533.178	517.532	0.852189		4.29876	44	440.967	426.696	0.893901		4.29976	44	316.044	301.906	0.880212		4.29776	44	665.308	650.392	0.897832		4.29776	44
4.39961	45	383.18	371.659	0.874203		4.39861	45	301.404	287.258	0.86793		4.40265	45	296.401	285.691	0.889549		4.39961	45	461.707	446.536	0.909249		4.40265	45	557.371	541.725	0.892026		4.40061	45	438.525	424.254	0.888786		4.40061	45	318.726	304.588	0.888032		4.39961	45	648.903	633.987	0.875185		4.39761	45
4.49846	46	387.502	375.981	0.884369		4.49746	46	312.201	298.055	0.900552		4.50239	46	307.192	296.482	0.923149		4.49846	46	455.051	439.88	0.895696		4.50339	46	544.646	529	0.871072		4.49846	46	450.37	436.099	0.9136		4.49946	46	341.271	327.133	0.953762		4.49846	46	651.006	636.09	0.878088		4.49846	46
4.5983	47	379.287	367.766	0.865046		4.5993	47	309.329	295.183	0.891875		4.60212	47	307.949	297.239	0.925506		4.5983	47	462.655	447.484	0.911179		4.60212	47	546.287	530.641	0.873774		4.6003	47	442.945	428.674	0.898045		4.5993	47	333.066	318.928	0.92984		4.5993	47	669.747	654.831	0.903959		4.5983	47
4.69815	48	390.181	378.66	0.890671		4.69715	48	306.205	292.059	0.882436		4.70286	48	311.471	300.761	0.936472		4.69815	48	460.764	445.593	0.907329		4.70186	48	548.069	532.423	0.876709		4.69915	48	431.322	417.051	0.873696		4.69915	48	327.879	313.741	0.914717		4.69815	48	653.036	638.12	0.880891		4.69815	48
4.798	49	390.892	379.371	0.892343		4.797	49	312.119	297.973	0.900304		4.8046	49	303.766	293.056	0.912481		4.8	49	453.815	438.644	0.893179		4.8026	49	530.101	514.455	0.847122		4.799	49	433.862	419.591	0.879017		4.8	49	314.024	299.886	0.874323		4.798	49	661.902	646.986	0.89313		4.798	49
4.89784	50	402.089	390.568	0.91868		4.89784	50	309.567	295.421	0.892594		4.90233	50	313.335	302.625	0.942276		4.89884	50	462.875	447.704	0.911627		4.90233	50	539.971	524.325	0.863374		4.89884	50	451.249	436.978	0.915442		4.89984	50	336.584	322.446	0.940097		4.89784	50	666.744	651.828	0.899814		4.89784	50
4.99769	51	393.32	381.799	0.898054		4.99769	51	315.745	301.599	0.91126		5.00307	51	318.016	307.306	0.956851		4.99869	51	451.29	436.119	0.888037		5.00207	51	552.218	536.572	0.883541		4.99869	51	451.795	437.524	0.916585		4.99969	51	322.388	308.25	0.898708		4.99869	51	659.551	644.635	0.889884		4.99869	51
5.09854	52	400.562	389.041	0.915089		5.09753	52	323.84	309.694	0.935718		5.10281	52	301.57	290.86	0.905644		5.10054	52	463.438	448.267	0.912774		5.10281	52	559.443	543.797	0.895438		5.09954	52	460.14	445.869	0.934068		5.09954	52	327.391	313.253	0.913295		5.09954	52	651.221	636.305	0.878385		5.09854	52
5.19838	53	409.944	398.423	0.937157		5.19738	53	308.125	293.979	0.888237		5.20254	53	305.362	294.652	0.917451		5.19838	53	454.232	439.061	0.894028		5.20254	53	570.651	555.005	0.913893		5.19938	53	455.969	441.698	0.92533		5.19938	53	328.419	314.281	0.916292		5.19838	53	646.476	631.56	0.871835		5.19838	53
5.29823	54	419.522	408.001	0.959686		5.29723	54	308.38	294.234	0.889007		5.30328	54	314.17	303.46	0.944876		5.29823	54	456.382	441.211	0.898406		5.30228	54	569.598	553.952	0.912159		5.29923	54	457.97	443.699	0.929522		5.30023	54	326.351	312.213	0.910262		5.29823	54	673.77	658.854	0.909513		5.29823	54
5.39807	55	406.176	394.655	0.928294		5.39807	55	320.287	306.141	0.924983		5.40301	55	300.415	289.705	0.902047		5.39907	55	473.548	458.377	0.93336		5.40301	55	556.455	540.809	0.890517		5.39907	55	451.539	437.268	0.916049		5.40008	55	330.583	316.445	0.922601		5.40008	55	673.071	658.155	0.908548		5.39807	55
5.49792	56	397.502	385.981	0.907891		5.49792	56	321.323	307.177	0.928114		5.50275	56	307.88	297.17	0.925291		5.49892	56	457.157	441.986	0.899984		5.50275	56	542.708	527.062	0.867881		5.49892	56	443.792	429.521	0.89982		5.49992	56	320.868	306.73	0.894277		5.49892	56	654.667	639.751	0.883142		5.49892	56
5.59877	57	401.247	389.726	0.9167		5.59777	57	320.316	306.17	0.925071		5.60249	57	302.364	291.654	0.908116		5.59877	57	462.625	447.454	0.911118		5.60249	57	564.511	548.865	0.903783		5.59977	57	450.243	435.972	0.913334		5.59977	57	314.563	300.425	0.875894		5.59877	57	665.706	650.79	0.898381		5.59877	57
5.69861	58	398.23	386.709	0.909603		5.69761	58	323.266	309.12	0.933984		5.70322	58	301.372	290.662	0.905027		5.69861	58	454.977	439.806	0.895545		5.70222	58	561.673	546.027	0.89911		5.69961	58	452.937	438.666	0.918978		5.69961	58	327.726	313.588	0.914271		5.69861	58	668.688	653.772	0.902498		5.69861	58
5.79846	59	397.602	386.081	0.908126		5.79746	59	317.019	302.873	0.915109		5.80296	59	316.744	306.034	0.952891		5.79846	59	478.535	463.364	0.943514		5.80296	59	562.048	546.402	0.899727		5.79946	59	446.802	432.531	0.906125		5.79946	59	325.191	311.053	0.90688		5.79846	59	675.744	660.828	0.912238		5.79846	59
5.89831	60	392.971	381.45	0.897233		5.89831	60	319.378	305.232	0.922237		5.90269	60	313.961	303.251	0.944225		5.89931	60	466.59	451.419	0.919192		5.90269	60	561.876	546.23	0.899444		5.89931	60	452.972	438.701	0.919051		5.90031	60	331.732	317.594	0.925951		5.89831	60	668.958	654.042	0.90287		5.89831	60
5.99815	61	388.902	377.381	0.887662		5.99815	61	314.582	300.436	0.907746		6.00343	61	313.53	302.82	0.942883		5.99915	61	471.393	456.222	0.928972		6.00243	61	564.924	549.278	0.904463		5.99915	61	442.5	428.229	0.897113		6.00015	61	328.367	314.229	0.91614		5.99915	61	665.267	650.351	0.897775		5.99915	61
6.099	62	399.458	387.937	0.912492		6.098	62	311.295	297.149	0.897815		6.10317	62	307.503	296.793	0.924117		6.099	62	459.869	444.698	0.905506		6.10317	62	579.341	563.695	0.928202		6.1	62	441.646	427.375	0.895324		6.102	62	332.746	318.608	0.928907		6.099	62	652.911	637.995	0.880718		6.099	62
6.19885	63	418.574	407.053	0.957456		6.19785	63	312.541	298.395	0.901579		6.2029	63	314.657	303.947	0.946392		6.19885	63	458.62	443.449	0.902963		6.2009	63	557.696	542.05	0.892561		6.19985	63	461.633	447.362	0.937195		6.19985	63	337.578	323.44	0.942995		6.19885	63	663.062	648.146	0.894731		6.19885	63
6.29869	64	403.653	392.132	0.922359		6.29769	64	313.386	299.24	0.904132		6.30364	64	306.005	295.295	0.919453		6.29869	64	467.56	452.389	0.921167		6.30264	64	553.031	537.385	0.884879		6.29769	64	445.302	431.031	0.902983		6.29969	64	340.939	326.801	0.952794		6.29869	64	654.278	639.362	0.882605		6.29869	64
6.39854	65	404.214	392.693	0.923679		6.39854	65	323.487	309.341	0.934652		6.40338	65	301.303	290.593	0.904812		6.39954	65	464.659	449.488	0.91526		6.40338	65	565.548	549.902	0.90549		6.39954	65	443.805	429.534	0.899847		6.40054	65	330.331	316.193	0.921866		6.39854	65	657.858	642.942	0.887547		6.39854	65
6.49838	66	400.862	389.341	0.915794		6.49838	66	313.85	299.704	0.905534		6.50311	66	303.71	293	0.912307		6.49939	66	477.505	462.334	0.941417		6.50311	66	547.013	531.367	0.87497		6.49939	66	440.507	426.236	0.892938		6.50039	66	330.025	315.887	0.920974		6.49939	66	651.186	636.27	0.878337		6.49939	66
6.59723	67	400.847	389.326	0.915759		6.59823	67	323.395	309.249	0.934374		6.60385	67	310.539	299.829	0.93357		6.59923	67	468.899	453.728	0.923893		6.60285	67	556.36	540.714	0.890361		6.60023	67	430.483	416.212	0.871938		6.60023	67	337.44	323.302	0.942593		6.59923	67	652.715	637.799	0.880448		6.59923	67
6.69908	68	390.882	379.361	0.89232		6.69808	68	315.713	301.567	0.911163		6.70358	68	301.703	290.993	0.906058		6.69908	68	464.07	448.899	0.91406		6.70158	68	553.195	537.549	0.885149		6.70008	68	452.993	438.722	0.919095		6.70008	68	325.091	310.953	0.906589		6.69908	68	653.583	638.667	0.881646		6.69908	68
6.79892	69	398.742	387.221	0.910808		6.79792	69	318.597	304.451	0.919877		6.80332	69	298.903	288.193	0.89734		6.79892	69	469.646	454.475	0.925414		6.80332	69	534.405	518.759	0.854209		6.79792	69	458.361	444.09	0.930341		6.79992	69	332.278	318.14	0.927543		6.79892	69	663.578	648.662	0.895443		6.79792	69
6.89877	70	411.609	400.088	0.941073		6.89877	70	318.062	303.916	0.918261		6.90306	70	320.939	310.229	0.965953		6.89977	70	455.139	439.968	0.895875		6.90306	70	538.307	522.661	0.860634		6.89977	70	456.63	442.359	0.926714		6.90077	70	324.016	309.878	0.903455		6.89877	70	632.317	617.401	0.852289		6.89877	70
6.99862	71	405.191	393.67	0.925977		6.99862	71	321.646	307.5	0.929089		7.00379	71	301.541	290.831	0.905553		6.99962	71	473.494	458.323	0.93325		7.00279	71	532.348	516.702	0.850822		6.99962	71	448.656	434.385	0.910009		7.00062	71	324.009	309.871	0.903434		6.99962	71	661.696	646.78	0.892845		6.99762	71
7.09746	72	397.223	385.702	0.907235		7.09646	72	327.467	313.321	0.946677		7.10353	72	297.84	287.13	0.89403		7.09946	72	476.643	461.472	0.939662		7.10353	72	545.113	529.467	0.871841		7.10046	72	436.848	422.577	0.885272		7.10046	72	333.309	319.171	0.930549		7.09946	72	642.949	628.033	0.866966		7.09746	72
7.19931	73	400.649	389.128	0.915293		7.19831	73	320.421	306.275	0.925388		7.20226	73	310.799	300.089	0.93438		7.19831	73	472.426	457.255	0.931075		7.20126	73	574.742	559.096	0.92063		7.20031	73	440.747	426.476	0.893441		7.20031	73	321.805	307.667	0.897008		7.19931	73	665.084	650.168	0.897522		7.19931	73
7.29716	74	387.867	376.346	0.885228		7.29716	74	327.567	313.421	0.946979		7.304	74	309.078	298.368	0.929021		7.29916	74	467.487	452.316	0.921018		7.303	74	557.518	541.872	0.892268		7.30016	74	448.926	434.655	0.910575		7.30016	74	327.329	313.191	0.913114		7.29716	74	659.973	645.057	0.890467		7.29816	74
7.399	75	398.184	386.663	0.909495		7.399	75	331.913	317.767	0.96011		7.40374	75	315.952	305.242	0.950425		7.4	75	456.522	441.351	0.898691		7.40174	75	545.417	529.771	0.872342		7.4	75	464.511	450.24	0.943225		7.401	75	330.206	316.068	0.921502		7.399	75	652.794	637.878	0.880557		7.399	75
7.49885	76	400.095	388.574	0.91399		7.49685	76	310.834	296.688	0.896422		7.50247	76	312.825	302.115	0.940688		7.49785	76	466.715	451.544	0.919446		7.50347	76	562.343	546.697	0.900213		7.49885	76	440.193	425.922	0.89228		7.49885	76	324.596	310.458	0.905146		7.49785	76	679.996	665.08	0.918108		7.49785	76
7.59769	77	390.825	379.304	0.892186		7.5987	77	309.642	295.496	0.89282		7.60421	77	321.295	310.585	0.967061		7.5997	77	461.583	446.412	0.908996		7.60221	77	556.565	540.919	0.890699		7.6007	77	438.981	424.71	0.889741		7.6007	77	317.641	303.503	0.884868		7.5997	77	665.817	650.901	0.898534		7.59769	77
7.69954	78	416.207	404.686	0.951888		7.69754	78	324.932	310.786	0.939018		7.70195	78	321.951	311.241	0.969104		7.69854	78	462.089	446.918	0.910027		7.70195	78	536.379	520.733	0.857459		7.69854	78	442.761	428.49	0.89766		7.70054	78	324.556	310.418	0.905029		7.69754	78	666.274	651.358	0.899165		7.69754	78
7.79739	79	402.562	391.041	0.919793		7.79739	79	310.358	296.212	0.894984		7.80368	79	315.523	304.813	0.949089		7.79939	79	478.534	463.363	0.943512		7.80368	79	540.112	524.466	0.863606		7.79839	79	453.934	439.663	0.921067		7.79939	79	338.243	324.105	0.944934		7.79739	79	651.092	636.176	0.878207		7.79839	79
7.89923	80	384.951	373.43	0.878369		7.89923	80	328.122	313.976	0.948656		7.90442	80	308.038	297.328	0.925783		7.90024	80	469.548	454.377	0.925215		7.90242	80	553.283	537.637	0.885294		7.89923	80	459.53	445.259	0.93279		7.89923	80	326.534	312.396	0.910796		7.89923	80	661.546	646.63	0.892638		7.89923	80
7.99808	81	393.85	382.329	0.899301		7.99908	81	320.294	306.148	0.925005		8.00215	81	309.648	298.938	0.930796		7.99808	81	460.584	445.413	0.906962		8.00416	81	561.463	545.817	0.898764		8.00008	81	446.581	432.31	0.905662		7.99908	81	328.729	314.591	0.917196		7.99808	81	666.05	651.134	0.898856		7.99808	81
8.09793	82	397.298	385.777	0.907411		8.09893	82	318.302	304.156	0.918986		8.10289	82	315.164	304.454	0.947971		8.09793	82	463.503	448.332	0.912906		8.10189	82	550.127	534.481	0.880097		8.10093	82	441.041	426.77	0.894056		8.10093	82	343.957	329.819	0.961593		8.09993	82	661.603	646.687	0.892717		8.09793	82
8.19777	83	397.559	386.038	0.908025		8.19677	83	324.233	310.087	0.936906		8.20263	83	301.719	291.009	0.906108		8.19877	83	480.36	465.189	0.947231		8.20263	83	564.939	549.293	0.904488		8.19877	83	439.099	424.828	0.889988		8.19977	83	332.167	318.029	0.927219		8.19977	83	686.17	671.254	0.92663		8.19977	83
8.29762	84	405.391	393.87	0.926447		8.29762	84	315.129	300.983	0.909399		8.30436	84	316.343	305.633	0.951642		8.29962	84	485.923	470.752	0.958558		8.30336	84	540.431	524.785	0.864132		8.29862	84	437.439	423.168	0.886511		8.29962	84	316.647	302.509	0.88197		8.29762	84	666.508	651.592	0.899488		8.29762	84
8.39947	85	402.482	390.961	0.919605		8.39947	85	312.859	298.713	0.90254		8.4021	85	314.5	303.79	0.945904		8.39847	85	468.722	453.551	0.923533		8.4021	85	546.801	531.155	0.874621		8.39847	85	443.689	429.418	0.899604		8.40147	85	327.911	313.773	0.914811		8.39847	85	680.322	665.406	0.918558		8.39947	85
8.49831	86	397.29	385.769	0.907392		8.49731	86	302.977	288.831	0.872682		8.50284	86	311.781	301.071	0.937438		8.49831	86	472.375	457.204	0.930971		8.50384	86	551.328	535.682	0.882075		8.49931	86	432.777	418.506	0.876744		8.49931	86	331.975	317.837	0.926659		8.49831	86	683.065	668.149	0.922344		8.49831	86
8.59816	87	396.907	385.386	0.906492		8.59916	87	307.888	293.742	0.887521		8.60457	87	315.195	304.485	0.948068		8.59816	87	477.084	461.913	0.94056		8.60257	87	548.79	533.144	0.877896		8.59916	87	437.802	423.531	0.887271		8.59916	87	325.309	311.171	0.907224		8.59816	87	681.74	666.824	0.920515		8.59816	87
8.69801	88	409.458	397.937	0.936014		8.697	88	319.561	305.415	0.92279		8.70231	88	317.949	307.239	0.956643		8.69801	88	471.423	456.252	0.929033		8.70231	88	553.392	537.746	0.885474		8.69901	88	448.658	434.387	0.910014		8.70001	88	328.067	313.929	0.915265		8.69801	88	675.728	660.812	0.912216		8.69801	88
8.79785	89	408.626	397.105	0.934057		8.79785	89	315.291	301.145	0.909888		8.80304	89	315.526	304.816	0.949098		8.79985	89	475.459	460.288	0.937251		8.80204	89	561.073	545.427	0.898122		8.79885	89	447.848	433.577	0.908317		8.79985	89	328.191	314.053	0.915627		8.79785	89	684.593	669.677	0.924454		8.79785	89
8.8977	90	417.894	406.373	0.955856		8.8977	90	319.646	305.5	0.923047		8.90278	90	304.058	293.348	0.913391		8.8987	90	470.294	455.123	0.926734		8.90278	90	563.125	547.479	0.901501		8.8987	90	439.053	424.782	0.889892		8.8997	90	320.191	306.053	0.892303		8.8987	90	679.065	664.149	0.916822		8.8987	90
8.99854	91	405.09	393.569	0.925739		8.99754	91	327.487	313.341	0.946738		9.00252	91	320.261	309.551	0.963842		8.99854	91	473.005	457.834	0.932254		9.00252	91	542.779	527.133	0.867998		8.99955	91	452.17	437.899	0.917371		8.99955	91	329.873	315.735	0.920531		8.99854	91	685.578	670.662	0.925813		8.99854	91
9.09839	92	412.002	400.481	0.941997		9.09739	92	318.983	304.837	0.921043		9.10325	92	309.508	298.798	0.93036		9.09839	92	465.117	449.946	0.916192		9.10225	92	560.677	545.031	0.89747		9.10039	92	444.522	430.251	0.901349		9.10139	92	327.201	313.063	0.912741		9.09839	92	672.871	657.955	0.908272		9.09839	92
9.19824	93	415.305	403.784	0.949767		9.19724	93	318.67	304.524	0.920098		9.20299	93	318.766	308.056	0.959187		9.19824	93	473.109	457.938	0.932466		9.20299	93	577.388	561.742	0.924987		9.19924	93	443.553	429.282	0.899319		9.20024	93	329.042	314.904	0.918108		9.19824	93	677.455	662.539	0.9146		9.19824	93
9.29808	94	405.636	394.115	0.927024		9.29808	94	327.511	313.365	0.94681		9.30272	94	306.654	295.944	0.921474		9.29908	94	463.487	448.316	0.912873		9.30272	94	562.64	546.994	0.900702		9.29908	94	428.38	414.109	0.867532		9.30008	94	315.63	301.492	0.879005		9.29808	94	669.448	654.532	0.903547		9.29808	94
9.39793	95	410.575	399.054	0.938641		9.39793	95	320.729	306.583	0.926319		9.40246	95	308.123	297.413	0.926048		9.39893	95	472.892	457.721	0.932024		9.40246	95	571.83	556.184	0.915834		9.39893	95	434.756	420.485	0.88089		9.39993	95	327.252	313.114	0.912889		9.39893	95	678.879	663.963	0.916566		9.39893	95
9.49878	96	407.165	395.644	0.93062		9.49778	96	317.136	302.99	0.915463		9.5032	96	323.943	313.233	0.975306		9.49878	96	466.09	450.919	0.918174		9.5022	96	546.208	530.562	0.873644		9.49978	96	445.005	430.734	0.902361		9.49978	96	315.663	301.525	0.879101		9.49878	96	674.848	659.932	0.911001		9.49878	96
9.59862	97	411.111	399.59	0.939902		9.59762	97	323.894	309.748	0.935882		9.60293	97	310.409	299.699	0.933166		9.59862	97	478.933	463.762	0.944325		9.60293	97	560.332	544.686	0.896901		9.59962	97	446.879	432.608	0.906287		9.59962	97	333.481	319.343	0.93105		9.59862	97	675.672	660.756	0.912139		9.59862	97
9.69847	98	410.484	398.963	0.938427		9.69747	98	309.322	295.176	0.891853		9.70267	98	312.657	301.947	0.940165		9.69847	98	467.452	452.281	0.920947		9.70267	98	552.414	536.768	0.883863		9.69947	98	451.388	437.117	0.915733		9.69947	98	321.865	307.727	0.897183		9.69847	98	680.687	665.771	0.919062		9.69847	98
9.79832	99	406.776	395.255	0.929705		9.79832	99	314.762	300.616	0.90829		9.80341	99	320.343	309.633	0.964097		9.79932	99	480.027	464.856	0.946552		9.8024	99	557.309	541.663	0.891924		9.79932	99	451.459	437.188	0.915882		9.80032	99	336.534	322.396	0.939951		9.79832	99	674.007	659.091	0.90984		9.79832	99
9.89816	100	422.513	410.992	0.966721		9.89816	100	329.507	315.361	0.952841		9.90314	100	323.7	312.99	0.974549		9.89916	100	469.799	454.628	0.925726		9.90314	100	550.503	534.857	0.880717		9.89916	100	462.347	448.076	0.938691		9.90016	100	333.266	319.128	0.930423		9.89916	100	695.994	681.078	0.940192		9.89916	100
9.99901	101	404.186	392.665	0.923613		9.99801	101	309.634	295.488	0.892796		10.0029	101	326.921	316.211	0.984579		9.99901	101	466.168	450.997	0.918332		10.0029	101	548.862	533.216	0.878014		10	101	450.605	436.334	0.914092		10	101	337.011	322.873	0.941342		9.99901	101	669.406	654.49	0.903489		9.99901	101
10.0989	102	410.142	398.621	0.937622		10.0979	102	311.273	297.127	0.897748		10.1036	102	312.956	302.246	0.941096		10.0989	102	480.421	465.25	0.947355		10.1026	102	557.84	542.194	0.892798		10.0999	102	448.601	434.33	0.909894		10.0999	102	331.902	317.764	0.926446		10.0989	102	667.782	652.866	0.901247		10.0989	102
10.1987	103	411.33	399.809	0.940417		10.1977	103	307.234	293.088	0.885545		10.2034	103	313.14	302.43	0.941669		10.1987	103	475.099	459.928	0.936518		10.2034	103	568.819	553.173	0.910876		10.1997	103	448.182	433.911	0.909016		10.1997	103	317.636	303.498	0.884854		10.1987	103	686.416	671.5	0.92697		10.1987	103
10.2985	104	424.992	413.471	0.972552		10.2985	104	309.116	294.97	0.891231		10.3031	104	318.064	307.354	0.957001		10.2995	104	470.442	455.271	0.927035		10.3031	104	561.724	546.078	0.899194		10.2995	104	448.408	434.137	0.90949		10.3005	104	334.209	320.071	0.933173		10.2985	104	672.436	657.52	0.907671		10.2985	104
10.3984	105	403.763	392.242	0.922618		10.3984	105	311.667	297.521	0.898939		10.4038	105	313.531	302.821	0.942886		10.3994	105	471.049	455.878	0.928271		10.4028	105	560.754	545.108	0.897596		10.3994	105	444.852	430.581	0.90204		10.4004	105	338.153	324.015	0.944671		10.3994	105	666.393	651.477	0.899329		10.3994	105
10.4992	106	406.222	394.701	0.928402		10.4982	106	322.373	308.227	0.931286		10.5016	106	321.562	310.852	0.967892		10.4992	106	464.2	449.029	0.914325		10.5036	106	550.552	534.906	0.880797		10.5002	106	450.781	436.51	0.914461		10.5002	106	337.377	323.239	0.942409		10.4992	106	682.092	667.176	0.921001		10.4992	106
10.5971	107	403.023	391.502	0.920877		10.5981	107	312.615	298.469	0.901803		10.6033	107	329.097	318.387	0.991354		10.5991	107	465.586	450.415	0.917147		10.6033	107	545.545	529.899	0.872553		10.6001	107	448.064	433.793	0.908769		10.6001	107	346.495	332.357	0.968993		10.5991	107	680.396	665.48	0.91866		10.5971	107
10.6989	108	408.251	396.73	0.933175		10.6979	108	324.56	310.414	0.937894		10.703	108	323.139	312.429	0.972803		10.6989	108	461.747	446.576	0.90933		10.703	108	567.39	551.744	0.908523		10.6999	108	445.988	431.717	0.90442		10.6999	108	331.481	317.343	0.925219		10.6989	108	666.527	651.611	0.899514		10.6989	108
10.7978	109	402.337	390.816	0.919264		10.7988	109	311.748	297.602	0.899183		10.8038	109	313.99	303.28	0.944316		10.7998	109	457.981	442.81	0.901662		10.8028	109	570.447	554.801	0.913557		10.7988	109	448.079	433.808	0.908801		10.7988	109	337.308	323.17	0.942208		10.7988	109	678.655	663.739	0.916256		10.7988	109
10.8986	110	409.15	397.629	0.935289		10.8986	110	330.087	315.941	0.954593		10.9035	110	309.598	298.888	0.93064		10.8996	110	461.861	446.69	0.909562		10.9035	110	551.811	536.165	0.88287		10.8996	110	442.411	428.14	0.896927		10.9006	110	341.848	327.71	0.955444		10.8996	110	680.113	665.197	0.918269		10.8996	110
10.9995	111	405.181	393.66	0.925953		10.9985	111	336.754	322.608	0.974737		11.0022	111	311.042	300.332	0.935137		10.9975	111	468.93	453.759	0.923956		11.0032	111	541.832	526.186	0.866439		10.9985	111	442.51	428.239	0.897134		11.0005	111	337.408	323.27	0.942499		10.9995	111	654.314	639.398	0.882655		10.9975	111
11.0973	112	410.312	398.791	0.938022		11.0983	112	325.966	311.82	0.942142		11.104	112	304.607	293.897	0.9151		11.0993	112	464.088	448.917	0.914097		11.103	112	555.847	540.201	0.889516		11.1003	112	446.853	432.582	0.906232		11.1003	112	337.122	322.984	0.941665		11.0993	112	674.839	659.923	0.910989		11.0993	112
11.1992	113	405.132	393.611	0.925838		11.1982	113	322.019	307.873	0.930216		11.2017	113	303.245	292.535	0.910859		11.1992	113	477.703	462.532	0.94182		11.2017	113	551.043	535.397	0.881606		11.2002	113	445.682	431.411	0.903779		11.2002	113	332.536	318.398	0.928295		11.1992	113	661.463	646.547	0.892524		11.1992	113
11.298	114	413.939	402.418	0.946554		11.297	114	321	306.854	0.927138		11.3034	114	316.679	305.969	0.952688		11.3	114	470.885	455.714	0.927937		11.3034	114	536.61	520.964	0.85784		11.3	114	451.998	437.727	0.917011		11.299	114	338.975	324.837	0.947068		11.298	114	680.405	665.489	0.918672		11.298	114
11.3989	115	411.008	399.487	0.939659		11.3989	115	317.442	303.296	0.916387		11.4042	115	323.302	312.592	0.97331		11.3999	115	469.133	453.962	0.92437		11.4022	115	545.648	530.002	0.872722		11.3999	115	455.814	441.543	0.925005		11.4009	115	348.375	334.237	0.974474		11.3989	115	672.894	657.978	0.908304		11.3999	115
11.4997	116	398.988	387.467	0.911386		11.4987	116	317.011	302.865	0.915085		11.5019	116	308.552	297.842	0.927383		11.4977	116	479.233	464.062	0.944936		11.5039	116	555.588	539.942	0.88909		11.4987	116	443.887	429.616	0.900019		11.5007	116	342.264	328.126	0.956657		11.4997	116	684.979	670.063	0.924986		11.4977	116
11.5996	117	396.206	384.685	0.904843		11.5986	117	325.311	311.165	0.940163		11.6037	117	327.348	316.638	0.985908		11.5996	117	469.509	454.338	0.925135		11.6017	117	548.169	532.523	0.876873		11.6006	117	455.745	441.474	0.92486		11.6006	117	343.743	329.605	0.960969		11.5996	117	658.786	643.87	0.888828		11.5976	117
11.6994	118	400.588	389.067	0.91515		11.6984	118	326.668	312.522	0.944263		11.7024	118	311.682	300.972	0.937129		11.6984	118	480.23	465.059	0.946966		11.7024	118	554.185	538.539	0.88678		11.6984	118	457.705	443.434	0.928967		11.7004	118	333.581	319.443	0.931342		11.6974	118	665.846	650.93	0.898574		11.6994	118
11.7982	119	415.354	403.833	0.949882		11.7972	119	321.543	307.397	0.928778		11.8041	119	301.445	290.735	0.905255		11.8002	119	468.441	453.27	0.922961		11.8041	119	563.902	548.256	0.90278		11.7992	119	458.249	443.978	0.930106		11.7992	119	329.715	315.577	0.92007		11.7982	119	663.049	648.133	0.894713		11.7982	119
11.8991	120	401.374	389.853	0.916999		11.8991	120	323.56	309.414	0.934872		11.9029	120	324.916	314.206	0.978336		11.8981	120	469.427	454.256	0.924968		11.9019	120	567.76	552.114	0.909133		11.9001	120	457.374	443.103	0.928273		11.8991	120	337.781	323.643	0.943587		11.8991	120	682.805	667.889	0.921985		11.9001	120
11.9979	121	402.557	391.036	0.919781		11.9969	121	319.43	305.284	0.922394		12.0026	121	318.63	307.92	0.958763		11.9979	121	469.612	454.441	0.925345		12.0036	121	543.759	528.113	0.869612		11.9989	121	463.352	449.081	0.940797		11.9989	121	336.496	322.358	0.93984		11.9979	121	675.138	660.222	0.911401		11.9979	121
12.0978	122	410.135	398.614	0.937606		12.0988	122	330.034	315.888	0.954433		12.1023	122	300.254	289.544	0.901546		12.0988	122	484.544	469.373	0.95575		12.1023	122	571.809	556.163	0.9158		12.1008	122	434.73	420.459	0.880835		12.1008	122	339.254	325.116	0.947881		12.0998	122	686.095	671.179	0.926527		12.0978	122
12.1976	123	403.788	392.267	0.922677		12.1976	123	322.859	308.713	0.932754		12.2021	123	312.122	301.412	0.938499		12.1986	123	473.796	458.625	0.933865		12.2021	123	556.835	541.189	0.891143		12.1986	123	446.091	431.82	0.904636		12.2006	123	338.513	324.375	0.945721		12.1996	123	681.956	667.04	0.920813		12.1976	123
12.2985	124	415.208	403.687	0.949539		12.2975	124	315.722	301.576	0.911191		12.3028	124	315.234	304.524	0.948189		12.3005	124	483.369	468.198	0.953358		12.3018	124	554.751	539.105	0.887712		12.2985	124	442.84	428.569	0.897825		12.2995	124	340.322	326.184	0.950995		12.2985	124	666.925	652.009	0.900064		12.2985	124
12.3993	125	409.759	398.238	0.936722		12.3993	125	319.136	304.99	0.921506		12.4025	125	317.88	307.17	0.956428		12.3983	125	482.473	467.302	0.951533		12.4025	125	567.175	551.529	0.908169		12.3993	125	460.889	446.618	0.935637		12.4013	125	342.04	327.902	0.956004		12.3993	125	651.048	636.132	0.878146		12.3983	125
12.4982	126	407.884	396.363	0.932311		12.4972	126	315.57	301.424	0.910731		12.5023	126	315.021	304.311	0.947526		12.4982	126	451.644	436.473	0.888758		12.5023	126	577.223	561.577	0.924715		12.4992	126	448.463	434.192	0.909605		12.4992	126	336.03	321.892	0.938482		12.5002	126	671.989	657.073	0.907054		12.4982	126
12.598	127	421.555	410.034	0.964468		12.599	127	329.164	315.018	0.951805		12.603	127	325.251	314.541	0.979379		12.598	127	463.469	448.298	0.912837		12.602	127	565.828	550.182	0.905951		12.599	127	455.003	440.732	0.923306		12.601	127	333.28	319.142	0.930464		12.6	127	683.572	668.656	0.923044		12.598	127
12.6979	128	408.465	396.944	0.933678		12.6979	128	326.37	312.224	0.943363		12.7028	128	308.326	297.616	0.92668		12.6989	128	475.648	460.477	0.937636		12.7028	128	563.48	547.834	0.902085		12.6989	128	443.166	428.895	0.898508		12.6999	128	339.414	325.276	0.948348		-1835.05	128	672.875	657.959	0.908277		12.6979	128
12.7977	129	407.109	395.588	0.930488		12.7977	129	313.057	298.911	0.903138		12.8025	129	311.745	301.035	0.937325		12.7987	129	470.848	455.677	0.927862		12.8025	129	550.67	535.024	0.880992		12.7987	129	446.274	432.003	0.905019		12.7997	129	338.556	324.418	0.945846		12.7987	129	666.467	651.551	0.899432		12.7987	129
12.8986	130	410.002	398.481	0.937293		12.8976	130	328.071	313.925	0.948502		12.9032	130	310.638	299.928	0.933879		12.8986	130	477.996	462.825	0.942417		12.9022	130	563.394	547.748	0.901943		12.9006	130	440.41	426.139	0.892735		12.8996	130	340.254	326.116	0.950797		12.8996	130	673.606	658.69	0.909287		12.8986	130
12.9984	131	401.834	390.313	0.918081		12.9974	131	322.221	308.075	0.930827		13.003	131	317.086	306.376	0.953956		12.9984	131	477.617	462.446	0.941645		13.004	131	564.173	548.527	0.903226		12.9994	131	445.619	431.348	0.903647		12.9994	131	344.436	330.298	0.96299		12.9984	131	663.205	648.289	0.894929		12.9984	131
13.0982	132	405.189	393.668	0.925972		13.0972	132	330.935	316.789	0.957156		13.1027	132	312.877	302.167	0.94085		13.0982	132	466.916	451.745	0.919856		13.1027	132	559.003	543.357	0.894713		13.0992	132	454.499	440.228	0.92225		13.1002	132	344.553	330.415	0.963331		13.0982	132	645.378	630.462	0.870319		13.0982	132
13.1981	133	413.361	401.84	0.945194		13.1981	133	302.375	288.229	0.870864		13.2024	133	322.885	312.175	0.972012		13.1991	133	486.072	470.901	0.958861		13.2024	133	544.536	528.89	0.870891		13.1991	133	452.005	437.734	0.917025		13.2001	133	341.102	326.964	0.953269		13.1981	133	662.976	648.06	0.894612		13.1981	133
13.2979	134	403.622	392.101	0.922286		13.2979	134	313.269	299.123	0.903779		13.3032	134	310.134	299.424	0.932309		13.2989	134	474.833	459.662	0.935976		13.3022	134	554.777	539.131	0.887754		13.2989	134	457.044	442.773	0.927582		13.2999	134	357.752	343.614	1.00181		13.2989	134	669.374	654.458	0.903445		13.2989	134
13.3988	135	409.613	398.092	0.936378		13.3978	135	320.738	306.592	0.926346		13.4029	135	325.178	314.468	0.979151		13.3988	135	467.266	452.095	0.920568		13.4029	135	541.968	526.322	0.866663		13.3998	135	452.551	438.28	0.918169		13.3998	135	330.271	316.133	0.921691		13.3988	135	671.842	656.926	0.906851		13.3988	135
13.4986	136	404.689	393.168	0.924796		13.4976	136	329.008	314.862	0.951333		13.5026	136	322.143	311.433	0.969701		13.4986	136	465.751	450.58	0.917483		13.5026	136	549.236	533.59	0.87863		13.4996	136	452.397	438.126	0.917847		13.4996	136	340.757	326.619	0.952263		13.4986	136	654.702	639.786	0.883191		13.4986	136
13.5985	137	411.416	399.895	0.940619		13.5975	137	316.843	302.697	0.914578		13.6034	137	319.346	308.636	0.960992		13.5985	137	479.988	464.817	0.946473		13.6024	137	535.496	519.85	0.856005		13.5995	137	447.128	432.857	0.906808		13.5995	137	341.968	327.83	0.955794		13.6005	137	672.874	657.958	0.908276		13.5985	137
13.6983	138	399.041	387.52	0.911511		13.6983	138	322.123	307.977	0.930531		13.7031	138	319.525	308.815	0.96155		13.6993	138	475.633	460.462	0.937605		13.7031	138	554.886	539.24	0.887934		13.6993	138	449.159	434.888	0.911063		13.7003	138	340.331	326.193	0.951021		13.6983	138	672.547	657.631	0.907825		13.6983	138
13.7982	139	401.119	389.598	0.916399		13.7982	139	332.205	318.059	0.960993		13.8029	139	334.832	324.122	1.00921		13.7992	139	473.809	458.638	0.933891		13.8029	139	568.922	553.276	0.911046		13.7992	139	464.995	450.724	0.944239		13.8002	139	332.462	318.324	0.928079		13.7992	139	682.003	667.087	0.920878		13.7992	139
13.899	140	398.557	387.036	0.910373		13.898	140	318.432	304.286	0.919379		13.9036	140	310.369	299.659	0.933041		13.899	140	471.27	456.099	0.928721		13.9026	140	560.498	544.852	0.897175		13.9	140	458.017	443.746	0.92962		13.9	140	334.174	320.036	0.933071		13.899	140	664.489	649.573	0.896701		13.899	140
13.9989	141	389.55	378.029	0.889187		13.9979	141	328.776	314.63	0.950632		14.0033	141	316.184	305.474	0.951147		13.9989	141	473.954	458.783	0.934186		14.0033	141	551.599	535.953	0.882521		13.9999	141	443.866	429.595	0.899975		13.9999	141	341.922	327.784	0.95566		13.9989	141	657.817	642.901	0.887491		13.9989	141
14.0967	142	387.466	375.945	0.884285		14.0977	142	351.275	337.129	1.01861		14.1031	142	313.029	302.319	0.941323		14.0987	142	487.363	472.192	0.96149		14.1031	142	546.551	530.905	0.874209		14.0997	142	439.375	425.104	0.890566		14.0997	142	340.722	326.584	0.952161		14.0987	142	664.761	649.845	0.897077		14.0987	142
14.1986	143	398.479	386.958	0.910189		14.1986	143	323.423	309.277	0.934459		14.2038	143	311.07	300.36	0.935224		14.1996	143	480.624	465.453	0.947768		14.2028	143	553.022	537.376	0.884865		14.1996	143	449.859	435.588	0.91253		14.2006	143	347.974	333.836	0.973305		14.1986	143	703.209	688.293	0.950152		14.1986	143
14.2984	144	394.394	382.873	0.900581		14.2984	144	317.313	303.167	0.915998		14.3035	144	316.45	305.74	0.951975		14.2994	144	471.387	456.216	0.928959		14.3035	144	553.234	537.588	0.885214		14.2994	144	451.114	436.843	0.915159		14.3004	144	352.473	338.335	0.986422		14.2994	144	667.686	652.77	0.901114		14.2974	144
14.3993	145	385.881	374.36	0.880557		14.3983	145	322.101	307.955	0.930464		14.4033	145	319.048	308.338	0.960065		14.3993	145	473.482	458.311	0.933225		14.4033	145	547.713	532.067	0.876122		14.4003	145	458.095	443.824	0.929784		14.4003	145	337.154	323.016	0.941759		14.3993	145	665.81	650.894	0.898525		14.3993	145
14.4991	146	393.673	382.152	0.898885		14.4981	146	332.345	318.199	0.961416		14.503	146	309.48	298.77	0.930273		14.4991	146	474.85	459.679	0.936011		14.503	146	571.528	555.882	0.915337		14.5001	146	454.559	440.288	0.922376		14.5001	146	344.94	330.802	0.964459		14.4991	146	684.371	669.455	0.924147		14.4991	146
14.5969	147	396.78	385.259	0.906193		14.5979	147	329.125	314.979	0.951687		14.6037	147	316.099	305.389	0.950882		14.5989	147	481.358	466.187	0.949263		14.6027	147	561.642	545.996	0.899059		14.5999	147	449.53	435.259	0.91184		14.5999	147	343.039	328.901	0.958917		14.5989	147	681.224	666.308	0.919803		14.5979	147
14.6988	148	405.11	393.589	0.925786		14.6988	148	329.984	315.838	0.954282		14.7035	148	311.257	300.547	0.935806		14.6978	148	472.61	457.439	0.93145		14.7035	148	549.023	533.377	0.87828		14.6998	148	428.949	414.678	0.868725		14.7008	148	342.763	328.625	0.958112		14.6988	148	663.286	648.37	0.89504		14.6988	148
14.7976	149	401.656	390.135	0.917662		14.7986	149	321.992	307.846	0.930135		14.8032	149	307.583	296.873	0.924366		14.7996	149	471.714	456.543	0.929625		14.8032	149	560.453	544.807	0.897101		14.7986	149	440.315	426.044	0.892536		14.7986	149	342.729	328.591	0.958013		14.7976	149	657.102	642.186	0.886504		14.7976	149
14.8995	150	395.296	383.775	0.902702		14.8985	150	323.604	309.458	0.935005		14.904	150	316.495	305.785	0.952115		14.8995	150	476.816	461.645	0.940014		14.9019	150	555.892	540.246	0.88959		14.9005	150	446.38	432.109	0.905241		14.9005	150	350.925	336.787	0.981908		14.8995	150	677.267	662.351	0.91434		14.8995	150
14.9993	151	397.591	386.07	0.9081		14.9983	151	317.32	303.174	0.916019		15.0037	151	314.417	303.707	0.945645		14.9983	151	465.985	450.814	0.91796		15.0037	151	543.132	527.486	0.868579		15.0003	151	446.707	432.436	0.905926		15.0003	151	343.271	329.133	0.959593		14.9973	151	645.986	631.07	0.871159		14.9973	151
15.0972	152	386.565	375.044	0.882165		15.0982	152	329.843	315.697	0.953856		15.1034	152	309.195	298.485	0.929386		15.0992	152	477.218	462.047	0.940833		15.1034	152	556.544	540.898	0.890664		15.1002	152	450.828	436.557	0.91456		15.1002	152	338.099	323.961	0.944514		15.0992	152	675.132	660.216	0.911393		15.0982	152
15.199	153	397.394	385.873	0.907637		15.199	153	324.095	309.949	0.936489		15.2042	153	303.781	293.071	0.912528		15.2	153	490.527	475.356	0.967933		15.2022	153	552.036	536.39	0.883241		15.2	153	436.666	422.395	0.884891		15.201	153	344.906	330.768	0.96436		15.199	153	678.659	663.743	0.916262		15.198	153
15.2979	154	406.419	394.898	0.928865		15.2969	154	328.699	314.553	0.9504		15.3039	154	317.835	307.125	0.956288		15.2999	154	496.751	481.58	0.980606		15.3039	154	550.429	534.783	0.880595		15.2989	154	444.157	429.886	0.900584		15.2989	154	360.738	346.6	1.01052		15.2979	154	664.865	649.949	0.89722		15.2979	154
15.3997	155	395.156	383.635	0.902373		15.3987	155	324.02	309.874	0.936262		15.4026	155	313.57	302.86	0.943008		15.3977	155	481.11	465.939	0.948758		15.4036	155	546.03	530.384	0.873351		15.4007	155	444.507	430.236	0.901318		15.4007	155	324.932	310.794	0.906125		15.3997	155	669.121	654.205	0.903095		15.3997	155
15.4976	156	397.371	385.85	0.907583		15.4986	156	326.682	312.536	0.944305		15.5024	156	312.822	302.112	0.940679		15.4986	156	473.765	458.594	0.933802		15.5034	156	547.385	531.739	0.875582		15.4986	156	443.085	428.814	0.898339		15.5006	156	338.03	323.892	0.944313		15.4996	156	676.094	661.178	0.912721		15.4976	156
15.5974	157	413.332	401.811	0.945126		15.5984	157	319.373	305.227	0.922222		15.6041	157	321.577	310.867	0.967939		15.5994	157	470.963	455.792	0.928096		15.6021	157	549.288	533.642	0.878716		15.6004	157	447.552	433.281	0.907697		15.6004	157	346.404	332.266	0.968727		15.5994	157	674.502	659.586	0.910523		15.5984	157
15.6983	158	390.798	379.277	0.892122		15.6973	158	329.253	315.107	0.952073		15.7028	158	303.395	292.685	0.911326		15.6983	158	473.181	458.01	0.932612		15.7018	158	554.491	538.845	0.887283		15.6993	158	444.625	430.354	0.901565		15.7013	158	342.661	328.523	0.957815		15.6983	158	669.347	654.431	0.903407		15.6993	158
15.7981	159	391.388	379.867	0.89351		15.7971	159	327.935	313.789	0.948091		15.8036	159	306.864	296.154	0.922128		15.8001	159	474.472	459.301	0.935241		15.8026	159	539.829	524.183	0.86314		15.7991	159	441.137	426.866	0.894258		15.7991	159	336.951	322.813	0.941167		15.7991	159	665.992	651.076	0.898776		15.7981	159
15.8999	160	395.133	383.612	0.902319		15.8989	160	336.341	322.195	0.973489		15.9023	160	315.853	305.143	0.950116		15.8979	160	461.507	446.336	0.908842		15.9023	160	538.81	523.164	0.861462		15.9009	160	453.219	438.948	0.919569		15.9009	160	342.181	328.043	0.956415		15.8999	160	665.15	650.234	0.897613		15.8979	160
15.9978	161	399.269	387.748	0.912047		15.9978	161	328.362	314.216	0.949381		16.002	161	301.215	290.505	0.904538		15.9988	161	482.363	467.192	0.951309		16.002	161	532.351	516.705	0.850827		15.9988	161	443.707	429.436	0.899642		15.9998	161	340.626	326.488	0.951881		15.9978	161	663.22	648.304	0.894949		15.9978	161
16.0976	162	395.15	383.629	0.902359		16.0986	162	336.968	322.822	0.975384		16.1028	162	316.385	305.675	0.951773		16.0986	162	472.78	457.609	0.931796		16.1018	162	542.095	526.449	0.866872		16.0986	162	450.648	436.377	0.914183		16.1006	162	338.478	324.34	0.945619		16.0996	162	666.556	651.64	0.899554		16.0976	162
16.1995	163	399.925	388.404	0.91359		16.1975	163	331.484	317.338	0.958814		16.2025	163	301.735	291.025	0.906158		16.1985	163	467.153	451.982	0.920338		16.2025	163	551.362	535.716	0.882131		16.1985	163	436.526	422.255	0.884598		16.1995	163	337.685	323.547	0.943307		16.1985	163	654.787	639.871	0.883308		16.1985	163
16.2983	164	380.468	368.947	0.867824		16.2973	164	322.035	307.889	0.930265		16.3043	164	316.378	305.668	0.951751		16.3003	164	478.38	463.209	0.943199		16.3023	164	548.183	532.537	0.876896		16.2993	164	460.157	445.886	0.934103		16.2993	164	341.535	327.397	0.954532		16.2983	164	659.346	644.43	0.889601		16.2983	164
16.3982	165	393.243	381.722	0.897873		16.3992	165	323.243	309.097	0.933915		16.403	165	317.015	306.305	0.953735		16.3982	165	457.455	442.284	0.900591		16.402	165	557.196	541.55	0.891738		16.4002	165	438.362	424.091	0.888444		16.3992	165	337.766	323.628	0.943543		16.3982	165	669.529	654.613	0.903658		16.3982	165
16.498	166	407.273	395.752	0.930874		16.497	166	328.027	313.881	0.948369		16.5027	166	313.894	303.184	0.944017		16.498	166	481.167	465.996	0.948874		16.5027	166	537.577	521.931	0.859432		16.499	166	449.266	434.995	0.911287		16.5	166	344.901	330.763	0.964345		16.498	166	652.126	637.21	0.879635		16.498	166
16.5979	167	396.132	384.611	0.904669		16.5979	167	322.251	308.105	0.930917		16.6025	167	317.749	307.039	0.95602		16.5989	167	471.937	456.766	0.930079		16.6025	167	543.578	527.932	0.869314		16.6009	167	434.22	419.949	0.879767		16.5999	167	323.098	308.96	0.900778		16.5999	167	668.564	653.648	0.902326		16.5979	167
16.6977	168	395.253	383.732	0.902601		16.6977	168	317.807	303.661	0.91749		16.7032	168	315.288	304.578	0.948357		16.6987	168	474.445	459.274	0.935186		16.7022	168	529.589	513.943	0.846279		16.6987	168	450.839	436.568	0.914583		16.6997	168	339.266	325.128	0.947916		16.6987	168	673.6	658.684	0.909278		16.6987	168
16.7986	169	403.913	392.392	0.922971		16.7976	169	309.997	295.851	0.893893		16.8039	169	317.703	306.993	0.955877		16.7986	169	477.576	462.405	0.941562		16.8029	169	522.776	507.13	0.83506		16.7996	169	458.52	444.249	0.930674		16.7996	169	337.977	323.839	0.944158		16.7986	169	671.894	656.978	0.906923		16.7986	169
16.8984	170	401.287	389.766	0.916794		16.8974	170	324.547	310.401	0.937855		16.9027	170	313.221	302.511	0.941921		16.8984	170	484.064	468.893	0.954773		16.9027	170	542.868	527.222	0.868145		16.8994	170	430.615	416.344	0.872215		16.9014	170	340.605	326.467	0.95182		16.8984	170	664.954	650.038	0.897343		16.8984	170
16.9983	171	407.446	395.925	0.931281		16.9973	171	322.347	308.201	0.931207		17.0024	171	310.69	299.98	0.934041		16.9983	171	484.849	469.678	0.956371		17.0024	171	536.887	521.241	0.858296		16.9993	171	432.652	418.381	0.876482		17.0003	171	345.406	331.268	0.965818		16.9983	171	668.306	653.39	0.90197		16.9983	171
17.0981	172	413.98	402.459	0.94665		17.0981	172	312.297	298.151	0.900842		17.1031	172	310.195	299.485	0.932499		17.0991	172	480.807	465.636	0.948141		17.1021	172	552.036	536.39	0.883241		17.0991	172	455.832	441.561	0.925043		17.1001	172	331.257	317.119	0.924566		17.0981	172	659.428	644.512	0.889715		17.0981	172
17.1979	173	396.239	384.718	0.90492		17.1979	173	326.955	312.809	0.94513		17.2029	173	321.111	310.401	0.966488		17.1989	173	477.472	462.301	0.94135		17.2029	173	541.591	525.945	0.866042		17.1989	173	441.27	426.999	0.894536		17.2	173	342.413	328.275	0.957091		17.1989	173	655.722	640.806	0.884599		17.1989	173
17.2988	174	388.727	377.206	0.887251		17.2978	174	320.213	306.067	0.92476		17.3026	174	321.941	311.231	0.969072		17.2988	174	474.691	459.52	0.935687		17.3026	174	528.072	512.426	0.843781		17.2998	174	437.222	422.951	0.886056		17.2998	174	341.264	327.126	0.953742		17.2988	174	661.359	646.443	0.89238		17.2988	174
17.3986	175	403.919	392.398	0.922985		17.3976	175	324.312	310.166	0.937145		17.4034	175	309.937	299.227	0.931696		17.3986	175	480.047	464.876	0.946593		17.4024	175	538.27	522.624	0.860573		17.3996	175	457.672	443.401	0.928897		17.3996	175	343.365	329.227	0.959867		17.3986	175	683.864	668.948	0.923447		17.3986	175
17.4985	176	396.048	384.527	0.904471		17.4975	176	318.205	304.059	0.918693		17.5031	176	317.722	307.012	0.955936		17.4985	176	481.409	466.238	0.949367		17.5031	176	551.749	536.103	0.882768		17.4995	176	444.885	430.614	0.902109		17.4995	176	336.863	322.725	0.94091		17.4985	176	693.844	678.928	0.937224		17.4985	176
17.5983	177	403.821	392.3	0.922754		17.5983	177	321.813	307.667	0.929594		17.6028	177	305.432	294.722	0.917669		17.5993	177	472.959	457.788	0.93216		17.6028	177	532.822	517.176	0.851602		17.5993	177	460.401	446.13	0.934614		17.6003	177	349.604	335.466	0.978057		17.5983	177	688.832	673.916	0.930305		17.5983	177
17.6982	178	405.839	394.318	0.927501		17.6982	178	330.276	316.13	0.955164		17.7036	178	318.139	307.429	0.957234		17.6992	178	485.424	470.253	0.957542		17.7026	178	540.094	524.448	0.863577		17.6992	178	454.613	440.342	0.922489		17.7002	178	326.106	311.968	0.909548		17.6992	178	654.769	639.853	0.883283		17.6992	178
17.799	179	399.897	388.376	0.913525		17.798	179	320.836	306.69	0.926642		17.8033	179	313.202	302.492	0.941862		17.799	179	481.304	466.133	0.949153		17.8033	179	548.902	533.256	0.87808		17.8	179	461.502	447.231	0.936921		17.8	179	329.546	315.408	0.919577		17.799	179	675.77	660.854	0.912274		17.799	179
17.8989	180	387.444	375.923	0.884233		17.8979	180	326.727	312.581	0.944441		17.903	180	304.578	293.868	0.91501		17.8989	180	482.886	467.715	0.952374		17.903	180	546.411	530.765	0.873979		17.8999	180	440.922	426.651	0.893807		17.8999	180	341.147	327.009	0.9534		17.8989	180	686.785	671.869	0.927479		17.8989	180
17.9987	181	396.309	384.788	0.905085		17.9977	181	327.091	312.945	0.945541		18.0038	181	312.506	301.796	0.939695		17.9987	181	479.962	464.791	0.94642		18.0028	181	540.955	525.309	0.864995		17.9997	181	464.492	450.221	0.943185		17.9997	181	343.178	329.04	0.959322		17.9987	181	664.76	649.844	0.897075		17.9987	181
18.0986	182	392.305	380.784	0.895667		18.0986	182	316.697	302.551	0.914136		18.1035	182	315.755	305.045	0.949811		18.0996	182	465.565	450.394	0.917105		18.1035	182	523.407	507.761	0.836099		18.0996	182	466.467	452.196	0.947322		18.1006	182	335.319	321.181	0.936409		18.0986	182	671.439	656.523	0.906295		18.0976	182
18.1984	183	395.123	383.602	0.902295		18.1984	183	312.948	298.802	0.902809		18.2032	183	308.834	298.124	0.928262		18.1994	183	473.644	458.473	0.933555		18.2032	183	534.813	519.167	0.854881		18.1994	183	432.168	417.897	0.875468		18.2004	183	337.52	323.382	0.942826		18.1994	183	681.842	666.926	0.920656		18.1994	183
18.2993	184	395.178	383.657	0.902425		18.2983	184	315.495	301.349	0.910505		18.302	184	307.191	296.481	0.923146		18.2993	184	494.111	478.94	0.975231		18.303	184	529.184	513.538	0.845612		18.2983	184	440.083	425.812	0.89205		18.3003	184	332.998	318.86	0.929642		18.2993	184	688.88	673.964	0.930372		18.2993	184
18.3991	185	390.781	379.26	0.892082		18.3981	185	320.214	306.068	0.924763		18.4037	185	308.261	297.551	0.926477		18.3991	185	493.431	478.26	0.973846		18.4027	185	539.745	524.099	0.863002		18.4001	185	448.965	434.694	0.910657		18.4001	185	343.429	329.291	0.960054		18.3991	185	658.11	643.194	0.887895		18.3991	185
18.499	186	385.683	374.162	0.880091		18.498	186	313.233	299.087	0.90367		18.5015	186	308.455	297.745	0.927081		18.498	186	484.555	469.384	0.955773		18.5035	186	541.97	526.324	0.866666		18.498	186	447.279	433.008	0.907125		18.5	186	343.86	329.722	0.96131		18.499	186	669.219	654.303	0.903231		18.499	186
18.5978	187	392.337	380.816	0.895742		18.5988	187	307.281	293.135	0.885687		18.6032	187	308.67	297.96	0.927751		18.5998	187	483.039	467.868	0.952686		18.6032	187	532.581	516.935	0.851206		18.5998	187	436.196	421.925	0.883907		18.6008	187	353.294	339.156	0.988815		18.5988	187	670.423	655.507	0.904893		18.5978	187
18.6986	188	389.216	377.695	0.888401		18.6986	188	321.663	307.517	0.929141		18.7039	188	310.127	299.417	0.932288		18.6996	188	490.466	475.295	0.967809		18.7029	188	520.81	505.164	0.831823		18.6996	188	445.982	431.711	0.904408		18.7006	188	356.372	342.234	0.997789		18.6996	188	664.571	649.655	0.896814		18.6976	188
18.7995	189	392.7	381.179	0.896596		18.7965	189	313.39	299.244	0.904145		18.8037	189	312.676	301.966	0.940224		18.7995	189	485.158	469.987	0.957		18.8037	189	525.308	509.662	0.83923		18.7985	189	436.86	422.589	0.885298		18.7985	189	335.748	321.61	0.93766		18.7995	189	669.304	654.388	0.903348		18.7995	189
18.8993	190	394.423	382.902	0.900649		18.8983	190	329.758	315.612	0.953599		18.9034	190	319.562	308.852	0.961665		18.8993	190	501.607	486.436	0.990494		18.9014	190	534.156	518.51	0.853799		18.9003	190	445.263	430.992	0.902901		18.9003	190	348.722	334.584	0.975485		18.8993	190	676.115	661.199	0.91275		18.8993	190
18.9972	191	387.719	376.198	0.88488		18.9982	191	323.465	309.319	0.934585		19.0021	191	318.402	307.692	0.958053		18.9982	191	490.844	475.673	0.968578		19.0031	191	546.01	530.364	0.873318		18.9982	191	445.211	430.94	0.902792		19.0002	191	350.843	336.705	0.981669		18.9972	191	683.387	668.471	0.922789		18.9982	191
19.098	192	399.807	388.286	0.913313		19.099	192	318.141	303.995	0.918499		19.1039	192	307.972	297.262	0.925578		19.1	192	485.294	470.123	0.957277		19.1039	192	535.717	520.071	0.856369		19.1	192	427.035	412.764	0.864715		19.101	192	333.497	319.359	0.931097		19.099	192	659.942	645.026	0.890424		19.098	192
19.1989	193	399.18	387.659	0.911838		19.1989	193	321.687	307.541	0.929213		19.2026	193	313.357	302.647	0.942345		19.1979	193	491.3	476.129	0.969507		19.2016	193	529.717	514.071	0.84649		19.1999	193	438.987	424.716	0.889753		19.2009	193	335.886	321.748	0.938062		19.1999	193	671.068	656.152	0.905783		19.1999	193
19.2977	194	392.049	380.528	0.895065		19.2967	194	318.223	304.077	0.918747		19.3043	194	305.225	294.515	0.917024		19.2997	194	490.288	475.117	0.967446		19.3023	194	530.069	514.423	0.847069		19.2987	194	438.853	424.582	0.889473		19.2987	194	335.689	321.551	0.937488		19.2977	194	668.604	653.688	0.902382		19.2977	194
19.3996	195	392.252	380.731	0.895542		19.3986	195	319.371	305.225	0.922216		19.4021	195	310.382	299.672	0.933081		19.3996	195	478.61	463.439	0.943667		19.4021	195	525.921	510.275	0.840239		19.4006	195	448.641	434.37	0.909978		19.4006	195	328.421	314.283	0.916298		19.3996	195	669.91	654.994	0.904184		19.3996	195
19.4974	196	384.469	372.948	0.877235		19.4974	196	326.941	312.795	0.945088		19.5028	196	313.302	302.592	0.942173		19.4984	196	476.217	461.046	0.938794		19.5038	196	542.075	526.429	0.866839		19.5004	196	423.947	409.676	0.858246		19.4994	196	334.147	320.009	0.932992		19.4974	196	658.346	643.43	0.888221		19.4984	196
19.5983	197	392.599	381.078	0.896358		19.5993	197	319.271	305.125	0.921914		19.6035	197	311.924	301.214	0.937883		19.6003	197	477.255	462.084	0.940908		19.6035	197	518.391	502.745	0.82784		19.6003	197	424.84	410.569	0.860116		19.6013	197	337.761	323.623	0.943528		19.5993	197	661.294	646.378	0.89229		19.5983	197
19.6981	198	398.631	387.11	0.910547		19.6991	198	331.52	317.374	0.958923		19.7023	198	314.543	303.833	0.946038		19.6981	198	471.363	456.192	0.928911		19.7023	198	541.174	525.528	0.865355		19.6991	198	428.992	414.721	0.868815		19.6991	198	341.229	327.091	0.953639		19.6981	198	676.859	661.943	0.913777		19.7001	198
19.798	199	383.727	372.206	0.87549		19.797	199	323.038	308.892	0.933295		19.804	199	306.915	296.205	0.922286		19.8	199	474.902	459.731	0.936117		19.802	199	542.977	527.331	0.868324		19.799	199	419.588	405.317	0.849114		19.799	199	355.195	341.057	0.994358		19.8	199	678.181	663.265	0.915602		19.798	199
19.8998	200	392.757	381.236	0.89673		19.8978	200	331.713	317.567	0.959506		19.9028	200	309.13	298.42	0.929183		19.8988	200	478.288	463.117	0.943011		19.9018	200	533.485	517.839	0.852694		19.9008	200	440.259	425.988	0.892418		19.8998	200	336.902	322.764	0.941024		19.8998	200	693.362	678.446	0.936559		19.8978	200
[truncated: 12 more columns]

## Sheet: 2J 3hUV
Cell 00						Cell 01						Cell 02						Cell 03						Cell 04						Cell 05						Cell 06						Cell 07						Cell 08
	paste BG		average pre-bleach				paste BG		average pre-bleach				paste BG		average pre-bleach				paste BG		average pre-bleach				paste BG		average pre-bleach				paste BG		average pre-bleach				paste BG		average pre-bleach				paste BG		average pre-bleach				paste BG
	1	10.757	453.212				1	12.647	422.263				1	10.147	401.033				1	12.029	307.778				1	11.47	363.04				1	9.473	320.192				1	11.947	402.65				1	12.881	411.102				1
	paste FRAP	RAW					paste FRAP	RAW					paste FRAP	RAW					paste FRAP	RAW					paste FRAP	RAW					paste FRAP	RAW					paste FRAP	RAW					paste FRAP	RAW					paste FRAP
Time	data here		minus BG	Normalized		Time	data here		minus BG	Normalized		Time	data here		minus BG	Normalized		Time	data here		minus BG	Normalized		Time	data here		minus BG	Normalized		Time	data here		minus BG	Normalized		Time	data here		minus BG	Normalized		Time	data here		minus BG	Normalized		Time	data here
0	1	499.357	488.6	1.07808		0	1	478.192	465.545	1.1025		0	1	433.216	423.069	1.05495		0	1	334.065	322.036	1.04632		0	1	397.137	385.667	1.06233		0	1	354.264	344.791	1.07682		0	1	449.181	437.234	1.08589		0	1	459.238	446.357	1.08576		0	1
0.0779433	2	470.257	459.5	1.01387		0.0798342	2	461.388	448.741	1.06271		0.0798342	2	423.002	412.855	1.02948		0.0798342	2	336.055	324.026	1.05279		0.0817251	2	401.283	389.813	1.07375		0.0798342	2	341.656	332.183	1.03745		0.0798342	2	434.526	422.579	1.0495		0.0779433	2	435.968	423.087	1.02915		0.0779433	2
0.171896	3	497.459	486.702	1.07389		0.173677	3	445.376	432.729	1.02479		0.171676	3	416.907	406.76	1.01428		0.171676	3	326.333	314.304	1.0212		0.171455	3	378.591	367.121	1.01124		0.171676	3	348.857	339.384	1.05994		0.170675	3	425.607	413.66	1.02734		0.170896	3	438.358	425.477	1.03497		0.171896	3
0.269852	4	470.164	459.407	1.01367		0.271522	4	442.674	430.027	1.01839		0.271522	4	433.955	423.808	1.05679		0.271522	4	325.655	313.626	1.019		0.271191	4	387.025	375.555	1.03447		0.272523	4	332.201	322.728	1.00792		0.271522	4	426.745	414.798	1.03017		0.271853	4	421.669	408.788	0.994372		0.270852	4
0.371809	5	482.051	471.294	1.0399		0.371368	5	444.241	431.594	1.0221		0.372369	5	417.527	407.38	1.01583		0.370368	5	332.292	320.263	1.04056		0.371928	5	379.175	367.705	1.01285		0.370368	5	331.568	322.095	1.00594		0.371368	5	431.649	419.702	1.04235		0.371809	5	432.39	419.509	1.02045		0.371809	5
0.469765	6	463.248	452.491	0.998409		0.471215	6	447.626	434.979	1.03011		0.472215	6	412.837	402.69	1.00413		0.471215	6	324.089	312.06	1.01391		0.471664	6	375.176	363.706	1.00183		0.472215	6	328.107	318.634	0.995133		0.471215	6	418.998	407.051	1.01093		0.471766	6	424.502	411.621	1.00126		0.472767	6
0.571723	7	475.384	464.627	1.02519		0.572061	7	453.227	440.58	1.04338		0.572061	7	396.855	386.708	0.96428		0.572061	7	329.659	317.63	1.03201		0.5714	7	374.304	362.834	0.999432		0.571061	7	343.42	333.947	1.04296		0.571061	7	420.509	408.562	1.01468		0.571723	7	433.764	420.883	1.02379		0.570722	7
0.671679	8	473.869	463.112	1.02184		0.671908	8	450.211	437.564	1.03624		0.671908	8	426.342	416.195	1.03781		0.671908	8	324.727	312.698	1.01598		0.672136	8	378.314	366.844	1.01048		0.671908	8	328.235	318.762	0.995533		0.670907	8	399.304	387.357	0.96202		0.671679	8	433.096	420.215	1.02217		0.67268	8
0.771636	9	477.206	466.449	1.02921		0.771754	9	453.66	441.013	1.0444		0.770753	9	408.197	398.05	0.992562		0.769753	9	325.737	313.708	1.01927		0.771872	9	372.61	361.14	0.994766		0.770753	9	327.028	317.555	0.991763		0.771754	9	412.467	400.52	0.994711		0.771636	9	413.994	401.113	0.975703		0.770635	9
0.871592	10	480.823	470.066	1.03719		0.8716	10	429.086	416.439	0.986208		0.872601	10	423.64	413.493	1.03107		0.8706	10	328.366	316.337	1.02781		0.871608	10	377.36	365.89	1.00785		0.8706	10	338.791	329.318	1.0285		0.8716	10	415.002	403.055	1.00101		0.871592	10	424.727	411.846	1.00181		0.872593	10
0.970548	11	466.149	455.392	1.00481		0.971447	11	440.288	427.641	1.01274		0.970446	11	421.033	410.886	1.02457		0.971447	11	320.085	308.056	1.0009		0.971344	11	382.913	371.443	1.02315		0.970446	11	329.021	319.548	0.997988		0.971447	11	412.557	400.61	0.994934		0.971549	11	438.734	425.853	1.03588		0.970548	11
1.07251	12	469.718	458.961	1.01268		1.07229	12	428.34	415.693	0.984441		1.07229	12	400.286	390.139	0.972835		1.07029	12	325.135	313.106	1.01731		1.07208	12	375.135	363.665	1.00172		1.07129	12	329.705	320.232	1.00012		1.07129	12	416.863	404.916	1.00563		1.07151	12	428.038	415.157	1.00986		1.07051	12
1.17046	13	457.273	446.516	0.985225		1.17214	13	440.535	427.888	1.01332		1.17214	13	413.072	402.925	1.00472		1.17214	13	320.215	308.186	1.00132		1.16982	13	372.083	360.613	0.993314		1.17214	13	334.085	324.612	1.0138		1.17114	13	415.252	403.305	1.00163		1.17146	13	428.209	415.328	1.01028		1.17246	13
1.27042	14	463.589	452.832	0.999161		1.27199	14	437.042	424.395	1.00505		1.27099	14	404.398	394.251	0.983089		1.26998	14	327.767	315.738	1.02586		1.27155	14	369.102	357.632	0.985103		1.27099	14	329.056	319.583	0.998097		1.27199	14	417.164	405.217	1.00638		1.27142	14	418.141	405.26	0.985791		1.27142	14
1.37238	15	461.948	451.191	0.99554		1.37183	15	443.411	430.764	1.02013		1.37283	15	411.665	401.518	1.00121		1.37083	15	297.441	285.412	0.92733		1.37229	15	373.826	362.356	0.998115		1.37083	15	334.367	324.894	1.01468		1.37183	15	415.822	403.875	1.00304		1.37138	15	429.188	416.307	1.01266		1.37138	15
1.47033	16	464.862	454.105	1.00197		1.47168	16	424.905	412.258	0.976306		1.47068	16	412.761	402.614	1.00394		1.47168	16	321.272	309.243	1.00476		1.47203	16	371.782	360.312	0.992485		1.47068	16	331.554	322.081	1.0059		1.47168	16	421.57	409.623	1.01732		1.47233	16	434.193	421.312	1.02484		1.47133	16
1.57229	17	464.259	453.502	1.00064		1.57253	17	430.478	417.831	0.989504		1.57253	17	407.817	397.67	0.991614		1.57052	17	318.224	306.195	0.994855		1.57176	17	373.87	362.4	0.998236		1.57153	17	331.588	322.115	1.006		1.57153	17	418.634	406.687	1.01003		1.57229	17	414.842	401.961	0.977766		1.57129	17
1.67225	18	468.719	457.962	1.01048		1.67237	18	430.013	417.366	0.988403		1.67137	18	420.903	410.756	1.02425		1.67037	18	324.893	312.864	1.01652		1.6705	18	379.03	367.56	1.01245		1.67237	18	325.451	315.978	0.986838		1.67137	18	416.042	404.095	1.00359		1.67225	18	406.868	393.987	0.958369		1.67125	18
1.7712	19	469.093	458.336	1.01131		1.77222	19	436.073	423.426	1.00275		1.77122	19	411.286	401.139	1.00026		1.77022	19	323.067	311.038	1.01059		1.77223	19	391.9	380.43	1.0479		1.77122	19	324.3	314.827	0.983244		1.77222	19	410.09	398.143	0.988807		1.7722	19	427.66	414.779	1.00895		1.7712	19
1.87116	20	454.081	443.324	0.978182		1.87106	20	438.014	425.367	1.00735		1.87106	20	408.578	398.431	0.993512		1.87106	20	319.975	307.946	1.00054		1.87197	20	355.462	343.992	0.947531		1.87106	20	327.526	318.053	0.993319		1.87206	20	401.973	390.026	0.968648		1.87216	20	413.952	401.071	0.975601		1.87116	20
2.02663	21	320.82	310.063	0.684145		2.03032	21	324.618	311.971	0.738808		2.03032	21	272.596	262.449	0.654433		2.03032	21	225.883	213.854	0.694831		2.035	21	250.578	239.108	0.658627		2.03032	21	235.708	226.235	0.70656		2.03132	21	287.22	275.273	0.683654		2.02763	21	278.463	265.582	0.646025		2.02663	21
2.10457	22	351.216	340.459	0.751213		2.11015	22	336.994	324.347	0.768116		2.11015	22	305.497	295.35	0.736473		2.11015	22	243.741	231.712	0.752853		2.11673	22	292.027	280.557	0.772799		2.11015	22	253.511	244.038	0.762161		2.11115	22	314.362	302.415	0.751062		2.10557	22	320.45	307.569	0.748158		2.10457	22
2.19552	23	367.712	356.955	0.787611		2.19999	23	351.807	339.16	0.803196		2.19899	23	323.617	313.47	0.781657		2.19999	23	265.992	253.963	0.825149		2.20246	23	292.634	281.164	0.77447		2.19699	23	257.983	248.51	0.776127		2.20099	23	336.015	324.068	0.804839		2.19652	23	331.794	318.913	0.775752		2.19552	23
2.29548	24	376.322	365.565	0.806609		2.29784	24	377.946	365.299	0.865098		2.29884	24	326.377	316.23	0.788539		2.29984	24	275.689	263.66	0.856655		2.30419	24	304.609	293.139	0.807456		2.29884	24	270.597	261.124	0.815522		2.30084	24	339.183	327.236	0.812706		2.29648	24	350.988	338.107	0.822442		2.29548	24
2.39544	25	396.161	385.404	0.850383		2.39968	25	383.224	370.577	0.877598		2.39868	25	344.43	334.283	0.833555		2.39968	25	277.114	265.085	0.861285		2.40493	25	320.866	309.396	0.852236		2.39868	25	277.761	268.288	0.837896		2.40068	25	348.172	336.225	0.835031		2.39644	25	353.819	340.938	0.829328		2.39544	25
2.49539	26	385.047	374.29	0.825861		2.49953	26	369.352	356.705	0.844746		2.49853	26	345.245	335.098	0.835587		2.49953	26	293.096	281.067	0.913212		2.50467	26	321.65	310.18	0.854396		2.49853	26	286.773	277.3	0.866042		2.50153	26	360.882	348.935	0.866597		2.49639	26	358.06	345.179	0.839644		2.49539	26
2.59535	27	394.166	383.409	0.845981		2.59838	27	384.824	372.177	0.881387		2.59838	27	337.684	327.537	0.816733		2.60038	27	281.034	269.005	0.874022		2.6034	27	322.792	311.322	0.857541		2.59938	27	284.138	274.665	0.857813		2.60138	27	351.644	339.697	0.843654		2.59635	27	353.01	340.129	0.82736		2.59535	27
2.69531	28	395.171	384.414	0.848199		2.70022	28	388.147	375.5	0.889256		2.69722	28	346.189	336.042	0.837941		2.70022	28	287.605	275.576	0.895371		2.70514	28	329.963	318.493	0.877294		2.69722	28	288.122	278.649	0.870255		2.70122	28	359.596	347.649	0.863403		2.69631	28	362.539	349.658	0.850539		2.69431	28
2.79526	29	400.773	390.016	0.86056		2.79807	29	379.492	366.845	0.86876		2.79907	29	334.475	324.328	0.808732		2.79807	29	288.303	276.274	0.897639		2.80488	29	341.086	329.616	0.907932		2.79907	29	292.835	283.362	0.884974		2.80107	29	370.576	358.629	0.890672		2.79626	29	365.047	352.166	0.85664		2.79626	29
2.89522	30	406.37	395.613	0.872909		2.89992	30	379.099	366.452	0.867829		2.89691	30	354.141	343.994	0.85777		2.89992	30	290.012	277.983	0.903192		2.90461	30	341.426	329.956	0.908869		2.89891	30	292.025	282.552	0.882445		2.89992	30	370.367	358.42	0.890153		2.89622	30	364.53	351.649	0.855382		2.89622	30
2.99418	31	406.063	395.306	0.872232		2.99876	31	387.022	374.375	0.886592		2.99876	31	351.781	341.634	0.851885		2.99976	31	294.636	282.607	0.918216		3.00535	31	330.156	318.686	0.877825		2.99876	31	301.337	291.864	0.911527		3.00176	31	370.839	358.892	0.891326		2.99718	31	365.164	352.283	0.856925		2.99618	31
3.09513	32	413.564	402.807	0.888783		3.09861	32	394.579	381.932	0.904489		3.09861	32	360.944	350.797	0.874734		3.09861	32	293.515	281.486	0.914574		3.10308	32	328.575	317.105	0.873471		3.09961	32	294.195	284.722	0.889222		3.10161	32	371.234	359.287	0.892307		3.09713	32	379.295	366.414	0.891298		3.09613	32
3.19509	33	396.584	385.827	0.851317		3.19845	33	405.243	392.596	0.929743		3.19745	33	351.535	341.388	0.851272		3.20046	33	298.966	286.937	0.932284		3.20482	33	330.552	319.082	0.878916		3.19745	33	294.466	284.993	0.890068		3.20146	33	369.267	357.32	0.887421		3.19709	33	379.712	366.831	0.892312		3.19409	33
3.29605	34	409.603	398.846	0.880043		3.3003	34	410.603	397.956	0.942437		3.2993	34	367.082	356.935	0.890039		3.2983	34	286.397	274.368	0.891447		3.30456	34	336.925	325.455	0.896471		3.2993	34	308.776	299.303	0.93476		3.3013	34	374.459	362.512	0.900316		3.29705	34	382.073	369.192	0.898056		3.29605	34
3.396	35	415.959	405.202	0.894067		3.40015	35	399.709	387.062	0.916637		3.39715	35	351.598	341.451	0.851429		3.40015	35	299.554	287.525	0.934195		3.40529	35	341.363	329.893	0.908695		3.39815	35	296.067	286.594	0.895068		3.40015	35	371.093	359.146	0.891956		3.397	35	371.039	358.158	0.871216		3.396	35
3.49396	36	417.355	406.598	0.897147		3.49899	36	403.349	390.702	0.925258		3.49899	36	352.304	342.157	0.853189		3.49999	36	295.34	283.311	0.920503		3.50503	36	334.38	322.91	0.88946		3.49899	36	299.798	290.325	0.906721		3.502	36	367.522	355.575	0.883088		3.49696	36	377.479	364.598	0.886881		3.49496	36
3.59592	37	416.712	405.955	0.895729		3.59884	37	404.796	392.149	0.928684		3.59784	37	357.521	347.374	0.866198		3.59884	37	291.576	279.547	0.908274		3.60376	37	346.873	335.403	0.923873		3.59984	37	299.276	289.803	0.90509		3.59984	37	378.089	366.142	0.909331		3.59492	37	376.4	363.519	0.884256		3.59592	37
3.69587	38	426.05	415.293	0.916333		3.70069	38	397.528	384.881	0.911472		3.69769	38	357.746	347.599	0.866759		3.70069	38	298.743	286.714	0.93156		3.7035	38	345.949	334.479	0.921327		3.69769	38	297.508	288.035	0.899569		3.70169	38	370.443	358.496	0.890342		3.69687	38	366.65	353.769	0.860539		3.69587	38
3.79583	39	419.315	408.558	0.901472		3.79853	39	397.843	385.196	0.912218		3.79953	39	362.626	352.479	0.878928		3.79853	39	298.296	286.267	0.930108		3.80324	39	339.139	327.669	0.902569		3.79753	39	299.237	289.764	0.904969		3.80053	39	361.829	349.882	0.868949		3.79583	39	377.003	364.122	0.885723		3.79583	39
3.89579	40	406.009	395.252	0.872113		3.90038	40	394.791	382.144	0.904991		3.89738	40	367.562	357.415	0.891236		3.90038	40	298.854	286.825	0.93192		3.90497	40	348.362	336.892	0.927974		3.89838	40	302.379	292.906	0.914782		3.90138	40	371.806	359.859	0.893727		3.89679	40	390.851	377.97	0.919408		3.89479	40
3.99374	41	414.579	403.822	0.891022		3.99923	41	401.104	388.457	0.919941		3.99923	41	354.657	344.51	0.859057		3.99923	41	295.225	283.196	0.92013		4.00371	41	359.096	347.626	0.957541		3.99923	41	308.071	298.598	0.932558		4.00223	41	373.86	361.913	0.898828		3.99574	41	397.097	384.216	0.934601		3.99474	41
4.0957	42	412.085	401.328	0.885519		4.09907	42	408.537	395.89	0.937544		4.09807	42	355.405	345.258	0.860922		4.09907	42	295.62	283.591	0.921413		4.10344	42	329.23	317.76	0.875275		4.09807	42	293.558	284.085	0.887232		4.10007	42	373.443	361.496	0.897793		4.0957	42	387.588	374.707	0.911471		4.0967	42
4.19466	43	415.153	404.396	0.892289		4.19892	43	406.439	393.792	0.932575		4.19792	43	367.392	357.245	0.890812		4.19892	43	296.683	284.654	0.924867		4.20518	43	339.138	327.668	0.902566		4.19792	43	302.067	292.594	0.913807		4.20192	43	376.203	364.256	0.904647		4.19566	43	378.237	365.356	0.888725		4.19466	43
4.29561	44	415.455	404.698	0.892955		4.29876	44	413.786	401.139	0.949975		4.29776	44	378.464	368.317	0.918421		4.29876	44	294.814	282.785	0.918794		4.30392	44	342.435	330.965	0.911648		4.29776	44	301.622	292.149	0.912417		4.30177	44	405.836	393.889	0.978242		4.29561	44	387.455	374.574	0.911147		4.29461	44
4.39457	45	404.426	393.669	0.86862		4.39961	45	414.137	401.49	0.950806		4.39761	45	369.155	359.008	0.895208		4.39961	45	294.977	282.948	0.919324		4.40365	45	336.029	324.559	0.894003		4.39761	45	310.839	301.366	0.941203		4.40061	45	386.323	374.376	0.929781		4.39757	45	383.154	370.273	0.900685		4.39457	45
4.49453	46	416.303	405.546	0.894826		4.49946	46	406.992	394.345	0.933885		4.49946	46	362.155	352.008	0.877753		4.49946	46	296.904	284.875	0.925585		4.50339	46	348.909	337.439	0.929481		4.49846	46	309.92	300.447	0.938333		4.50246	46	374.021	362.074	0.899228		4.49553	46	377.655	364.774	0.887309		4.49453	46
4.59648	47	407.861	397.104	0.876199		4.5993	47	412.626	399.979	0.947227		4.5983	47	368.043	357.896	0.892436		4.5993	47	312.204	300.175	0.975296		4.60413	47	358.164	346.694	0.954974		4.5983	47	295.307	285.834	0.892695		4.6003	47	374.879	362.932	0.901359		4.59548	47	385.152	372.271	0.905545		4.59548	47
4.69444	48	425.274	414.517	0.91462		4.69915	48	408.514	395.867	0.937489		4.69815	48	374.266	364.119	0.907953		4.69915	48	297.157	285.128	0.926407		4.70386	48	352.334	340.864	0.938915		4.69815	48	310.219	300.746	0.939267		4.70215	48	386.683	374.736	0.930675		4.69544	48	387.832	374.951	0.912064		4.69544	48
4.7944	49	420.674	409.917	0.904471		4.799	49	402.212	389.565	0.922565		4.798	49	365.391	355.244	0.885823		4.799	49	290.053	278.024	0.903325		4.8036	49	358.604	347.134	0.956186		4.798	49	308.618	299.145	0.934267		4.8	49	376.743	364.796	0.905989		4.7954	49	383.594	370.713	0.901755		4.7964	49
4.89435	50	425.714	414.957	0.915591		4.89984	50	404.842	392.195	0.928793		4.89784	50	374.682	364.535	0.90899		4.89984	50	304.985	292.956	0.951841		4.90433	50	337.729	326.259	0.898685		4.89784	50	307.569	298.096	0.930991		4.90084	50	383.583	371.636	0.922976		4.89635	50	386.898	374.017	0.909792		4.89535	50
4.99431	51	419.755	408.998	0.902443		4.99969	51	394.535	381.888	0.904384		4.99769	51	370.819	360.672	0.899358		4.99969	51	298.104	286.075	0.929484		5.00407	51	356.956	345.486	0.951646		4.99869	51	307.707	298.234	0.931422		5.00069	51	370.162	358.215	0.889644		4.99631	51	394.507	381.626	0.928301		4.99531	51
5.09427	52	423.041	412.284	0.909693		5.09954	52	415.749	403.102	0.954623		5.09854	52	371.083	360.936	0.900016		5.09954	52	302.263	290.234	0.942997		5.10381	52	350.299	338.829	0.93331		5.09854	52	309.909	300.436	0.938299		5.10054	52	367.909	355.962	0.884049		5.09627	52	380.018	367.137	0.893057		5.09727	52
5.19522	53	418.182	407.425	0.898972		5.19938	53	416.302	403.655	0.955933		5.19838	53	370.419	360.272	0.89836		5.19938	53	312.444	300.415	0.976076		5.20454	53	354.487	343.017	0.944846		5.19838	53	305.843	296.37	0.9256		5.20038	53	382.498	370.551	0.920281		5.19622	53	400.746	387.865	0.943477		5.19522	53
5.29518	54	417.329	406.572	0.89709		5.29923	54	411.742	399.095	0.945134		5.29823	54	371.509	361.362	0.901078		5.29923	54	297.405	285.376	0.927213		5.30428	54	348.743	337.273	0.929024		5.29823	54	311.322	301.849	0.942712		5.30023	54	374.308	362.361	0.899941		5.29618	54	388.769	375.888	0.914344		5.29518	54
5.39514	55	424.541	413.784	0.913003		5.39907	55	419.395	406.748	0.963258		5.39807	55	369.678	359.531	0.896512		5.39907	55	304.327	292.298	0.949703		5.40401	55	348.303	336.833	0.927812		5.39807	55	297.431	287.958	0.899328		5.40108	55	388.175	376.228	0.93438		5.39614	55	392.746	379.865	0.924018		5.39514	55
5.49509	56	432.087	421.33	0.929653		5.49992	56	414.43	401.783	0.9515		5.49792	56	357.904	347.757	0.867153		5.49992	56	301.452	289.423	0.940362		5.50475	56	342.686	331.216	0.912339		5.49892	56	304.348	294.875	0.920931		5.50092	56	373.293	361.346	0.89742		5.49609	56	394.905	382.024	0.929269		5.49509	56
5.59505	57	426.595	415.838	0.917535		5.59977	57	412.977	400.33	0.948059		5.59877	57	371.823	361.676	0.901861		5.59977	57	306.591	294.562	0.957059		5.60449	57	354.059	342.589	0.943667		5.59877	57	303.216	293.743	0.917396		5.60077	57	398.983	387.036	0.961223		5.59605	57	383.625	370.744	0.901831		5.59505	57
5.69501	58	424.927	414.17	0.913855		5.69961	58	403.802	391.155	0.92633		5.69861	58	372.465	362.318	0.903462		5.69961	58	306.567	294.538	0.956981		5.70422	58	359.032	347.562	0.957365		5.69861	58	306.1	296.627	0.926403		5.70062	58	387.586	375.639	0.932918		5.69601	58	390.887	378.006	0.919496		5.69501	58
5.79496	59	417.223	406.466	0.896856		5.79946	59	407.59	394.943	0.935301		5.79846	59	375.512	365.365	0.91106		5.79946	59	308.663	296.634	0.963791		5.80396	59	346.929	335.459	0.924027		5.79846	59	302.996	293.523	0.916708		5.80046	59	374.904	362.957	0.901421		5.79596	59	391.572	378.691	0.921162		5.79596	59
5.89492	60	418.677	407.92	0.900064		5.89931	60	409.011	396.364	0.938666		5.89831	60	360.173	350.026	0.872811		5.89931	60	296.571	284.542	0.924503		5.9047	60	349.597	338.127	0.931376		5.89831	60	307.459	297.986	0.930647		5.90131	60	375.359	363.412	0.902551		5.89592	60	382.617	369.736	0.899379		5.89592	60
5.99488	61	412.893	402.136	0.887302		6.00015	61	410.11	397.463	0.941269		5.99815	61	366.83	356.683	0.889411		6.00015	61	305.511	293.482	0.95355		6.00443	61	363.356	351.886	0.969275		5.99915	61	302.058	292.585	0.913779		6.00115	61	391.269	379.322	0.942065		5.99588	61	396.048	383.167	0.93205		5.99588	61
6.09483	62	412.997	402.24	0.887531		6.098	62	412.034	399.387	0.945825		6.099	62	353.811	343.664	0.856947		6.098	62	303.596	291.567	0.947328		6.10317	62	346.151	334.681	0.921884		6.099	62	308.196	298.723	0.932949		6.101	62	373.542	361.595	0.898039		6.09683	62	391.691	378.81	0.921451		6.09583	62
6.19479	63	419.397	408.64	0.901653		6.19985	63	418.319	405.672	0.96071		6.19684	63	364.543	354.396	0.883708		6.19985	63	297.944	285.915	0.928964		6.2049	63	357.044	345.574	0.951889		6.19684	63	311.427	301.954	0.94304		6.20085	63	371.172	359.225	0.892153		6.19679	63	386.804	373.923	0.909564		6.19579	63
6.29474	64	412.037	401.28	0.885413		6.29869	64	405.184	392.537	0.929603		6.29869	64	369.188	359.041	0.895291		6.29969	64	306.969	294.94	0.958287		6.30464	64	351.641	340.171	0.937006		6.29869	64	310.018	300.545	0.938639		6.30069	64	358.848	346.901	0.861545		6.29675	64	396.246	383.365	0.932531		6.29374	64
6.3957	65	413.987	403.23	0.889716		6.39954	65	403.548	390.901	0.925729		6.39854	65	373.551	363.404	0.90617		6.39954	65	302.067	290.038	0.94236		6.40438	65	354.643	343.173	0.945275		6.39854	65	307.284	297.811	0.9301		6.40154	65	374.429	362.482	0.900242		6.3967	65	385.667	372.786	0.906798		6.3957	65
6.49366	66	420.857	410.1	0.904874		6.50039	66	398.469	385.822	0.913701		6.49838	66	376.219	366.072	0.912823		6.50039	66	304.71	292.681	0.950947		6.50511	66	353.234	341.764	0.941394		6.49939	66	316.137	306.664	0.957749		6.50139	66	379.76	367.813	0.913481		6.49666	66	386.794	373.913	0.909539		6.49466	66
6.59562	67	420.397	409.64	0.903859		6.59823	67	433.101	420.454	0.995716		6.59923	67	372.371	362.224	0.903228		6.59823	67	298.568	286.539	0.930991		6.60285	67	363.072	351.602	0.968493		6.59923	67	317.235	307.762	0.961179		6.60123	67	380.196	368.249	0.914564		6.59662	67	384.769	371.888	0.904614		6.59562	67
6.69557	68	404.447	393.69	0.868666		6.70008	68	423.406	410.759	0.972757		6.69708	68	382.782	372.635	0.929188		6.70008	68	299.442	287.413	0.933831		6.70459	68	364.733	353.263	0.973068		6.69708	68	318.928	309.455	0.966466		6.70108	68	378.082	366.135	0.909314		6.69657	68	399.377	386.496	0.940147		6.69457	68
6.79553	69	418.841	408.084	0.900426		6.79892	69	405.907	393.26	0.931316		6.79892	69	384.055	373.908	0.932362		6.79992	69	300.907	288.878	0.938591		6.80332	69	354.807	343.337	0.945727		6.79892	69	302.089	292.616	0.913876		6.80093	69	375.782	363.835	0.903602		6.79653	69	392.536	379.655	0.923507		6.79553	69
6.89549	70	415.477	404.72	0.893004		6.89977	70	416.556	403.909	0.956534		6.89877	70	373.434	363.287	0.905878		6.89977	70	311.561	299.532	0.973207		6.90506	70	363.108	351.638	0.968592		6.89777	70	311.461	301.988	0.943146		6.90177	70	367.367	355.42	0.882703		6.89649	70	395.252	382.371	0.930113		6.89549	70
6.99344	71	424.91	414.153	0.913817		7.00062	71	416.505	403.858	0.956414		6.99862	71	381.556	371.409	0.926131		7.00062	71	308.39	296.361	0.962904		7.00379	71	358.118	346.648	0.954847		6.99962	71	294.309	284.836	0.889578		7.00162	71	384.11	372.163	0.924285		6.99644	71	402.66	389.779	0.948133		6.99644	71
7.0954	72	423.397	412.64	0.910479		7.09846	72	410.922	398.275	0.943192		7.09746	72	369.883	359.736	0.897024		7.09846	72	311.915	299.886	0.974357		7.10353	72	347.169	335.699	0.924688		7.09746	72	319.772	310.299	0.969102		7.10147	72	374.292	362.345	0.899901		7.0954	72	399.073	386.192	0.939408		7.0964	72
7.19435	73	419.838	409.081	0.902626		7.20031	73	410.69	398.043	0.942643		7.19731	73	368.581	358.434	0.893777		7.20031	73	312.818	300.789	0.977291		7.20527	73	356.977	345.507	0.951704		7.19731	73	314.922	305.449	0.953955		7.20131	73	363.263	351.316	0.87251		7.19736	73	396.629	383.748	0.933463		7.19435	73
7.29531	74	416.597	405.84	0.895475		7.30016	74	406.493	393.846	0.932703		7.29916	74	376.675	366.528	0.91396		7.30016	74	310.168	298.139	0.968681		7.303	74	365.764	354.294	0.975908		7.29916	74	303.313	293.84	0.917699		7.30116	74	384.292	372.345	0.924737		7.29531	74	389.922	377.041	0.917148		7.29631	74
7.39527	75	432.743	421.986	0.9311		7.4	75	417.239	404.592	0.958152		7.399	75	367.109	356.962	0.890107		7.4	75	301.468	289.439	0.940414		7.40474	75	345.584	334.114	0.920322		7.399	75	313.407	303.934	0.949223		7.4	75	384.267	372.32	0.924675		7.39727	75	400.454	387.573	0.942767		7.39627	75
7.49422	76	423.397	412.64	0.910479		7.49885	76	411.152	398.505	0.943737		7.49885	76	367.741	357.594	0.891682		7.49885	76	300.459	288.43	0.937135		7.50347	76	347.73	336.26	0.926233		7.49985	76	312.845	303.372	0.947468		7.50185	76	366.186	354.239	0.87977		7.49723	76	404.693	391.812	0.953078		7.49422	76
7.59618	77	412.539	401.782	0.886521		7.5987	77	415.812	403.165	0.954772		7.59769	77	381.16	371.013	0.925144		7.5987	77	298.054	286.025	0.929321		7.60321	77	349.011	337.541	0.929762		7.5997	77	315.999	306.526	0.957318		7.5997	77	380.517	368.57	0.915361		7.59518	77	386.524	373.643	0.908883		7.59618	77
7.69414	78	423.049	412.292	0.909711		7.69854	78	430.893	418.246	0.990487		7.69754	78	368.05	357.903	0.892453		7.70054	78	285.731	273.702	0.889283		7.70395	78	343.082	331.612	0.91343		7.69754	78	318.033	308.56	0.963671		7.70154	78	372.621	360.674	0.895751		7.69714	78	400.772	387.891	0.943541		7.69514	78
7.7961	79	415.673	404.916	0.893436		7.79939	79	425.029	412.382	0.9766		7.79739	79	383.274	373.127	0.930415		7.79939	79	301.417	289.388	0.940248		7.80368	79	360.166	348.696	0.960488		7.79939	79	307.106	297.633	0.929545		7.80139	79	378.076	366.129	0.909299		7.7971	79	393.822	380.941	0.926635		7.79509	79
7.89405	80	412.416	401.659	0.88625		7.89923	80	421.363	408.716	0.967918		7.89823	80	371.724	361.577	0.901614		7.90024	80	304.822	292.793	0.951311		7.90542	80	353.422	341.952	0.941912		7.89823	80	320.181	310.708	0.970379		7.90024	80	368.631	356.684	0.885842		7.89705	80	404.845	391.964	0.953448		7.89605	80
7.99401	81	424.721	413.964	0.9134		7.99908	81	419.33	406.683	0.963104		7.99808	81	360.755	350.608	0.874262		7.99908	81	296.94	284.911	0.925702		8.00416	81	362.502	351.032	0.966923		7.99808	81	312.137	302.664	0.945257		8.00208	81	369.864	357.917	0.888904		7.99601	81	404.45	391.569	0.952487		7.99501	81
8.09597	82	421.991	411.234	0.907376		8.09893	82	414.547	401.9	0.951777		8.09793	82	375.283	365.136	0.910489		8.09893	82	304.529	292.5	0.950359		8.10389	82	364.745	353.275	0.973101		8.09793	82	307.53	298.057	0.930869		8.09993	82	377.874	365.927	0.908797		8.09597	82	400.375	387.494	0.942575		8.09496	82
8.19392	83	410.972	400.215	0.883063		8.19877	83	410.069	397.422	0.941172		8.19777	83	376.461	366.314	0.913426		8.20078	83	305.576	293.547	0.953761		8.20363	83	364.804	353.334	0.973264		8.19777	83	300.714	291.241	0.909582		8.20178	83	367.702	355.755	0.883535		8.19692	83	398.514	385.633	0.938048		8.19492	83
8.29588	84	410.082	399.325	0.8811		8.29962	84	415.111	402.464	0.953112		8.29962	84	368.456	358.309	0.893465		8.29962	84	300.177	288.148	0.936219		8.30336	84	357.568	346.098	0.953332		8.29762	84	310.952	301.479	0.941556		8.30062	84	368.947	357	0.886627		8.29588	84	402.696	389.815	0.948221		8.29488	84
8.39483	85	421.785	411.028	0.906922		8.40047	85	421.799	409.152	0.968951		8.39747	85	370.467	360.32	0.89848		8.40047	85	306.807	294.778	0.957761		8.4041	85	352.904	341.434	0.940485		8.39847	85	309.525	300.052	0.937099		8.40047	85	369.926	357.979	0.889058		8.39784	85	404.063	391.182	0.951546		8.39483	85
8.49479	86	420.021	409.264	0.90303		8.49931	86	420.961	408.314	0.966966		8.49831	86	364.268	354.121	0.883022		8.49931	86	297.785	285.756	0.928447		8.50384	86	355.45	343.98	0.947498		8.49931	86	312.172	302.699	0.945366		8.50232	86	376.57	364.623	0.905559		8.49579	86	409.45	396.569	0.96465		8.49479	86
8.59475	87	430.126	419.369	0.925326		8.59916	87	413.454	400.807	0.949188		8.59816	87	372.788	362.641	0.904267		8.59916	87	302.186	290.157	0.942746		8.60357	87	351.09	339.62	0.935488		8.59816	87	306.751	297.278	0.928436		8.60016	87	376.625	364.678	0.905695		8.59575	87	387.314	374.433	0.910804		8.59475	87
8.6947	88	411.87	401.113	0.885045		8.69901	88	429.624	416.977	0.987482		8.69801	88	372.815	362.668	0.904335		8.69901	88	301.223	289.194	0.939618		8.70431	88	353.132	341.662	0.941113		8.69801	88	319.744	310.271	0.969015		8.70001	88	371.92	359.973	0.89401		8.6957	88	403.958	391.077	0.951291		8.6947	88
8.79466	89	435.8	425.043	0.937846		8.79985	89	424.017	411.37	0.974204		8.79785	89	374.745	364.598	0.909147		8.79985	89	305.836	293.807	0.954606		8.80404	89	346.838	335.368	0.923776		8.79785	89	322.672	313.199	0.978159		8.80085	89	366.865	354.918	0.881456		8.79566	89	396.431	383.55	0.932981		8.79466	89
8.89462	90	421.06	410.303	0.905322		8.8997	90	417.349	404.702	0.958412		8.8977	90	379.987	369.84	0.922219		8.9007	90	306.145	294.116	0.95561		8.90378	90	364.378	352.908	0.97209		8.8987	90	310.352	300.879	0.939682		8.9007	90	380.283	368.336	0.91478		8.89762	90	407.286	394.405	0.959386		8.89562	90
8.99457	91	425.193	414.436	0.914442		8.99955	91	433.239	420.592	0.996043		8.99854	91	375.513	365.366	0.911062		8.99955	91	301.669	289.64	0.941067		9.00452	91	353.904	342.434	0.94324		8.99854	91	311.418	301.945	0.943011		9.00255	91	381.57	369.623	0.917977		8.99557	91	401.242	388.361	0.944684		8.99557	91
9.09453	92	415.405	404.648	0.892845		9.09939	92	413.651	401.004	0.949655		9.09839	92	365.95	355.803	0.887216		9.09939	92	304.148	292.119	0.949121		9.10425	92	367.996	356.526	0.982056		9.09839	92	314.07	304.597	0.951294		9.10039	92	378.721	366.774	0.910901		9.09653	92	404.315	391.434	0.952159		9.09553	92
9.19449	93	413.057	402.3	0.887664		9.19924	93	413.249	400.602	0.948703		9.19824	93	371.577	361.43	0.901248		9.19924	93	307.98	295.951	0.961572		9.20399	93	347.82	336.35	0.926481		9.19824	93	316.362	306.889	0.958452		9.20024	93	376.708	364.761	0.905902		9.19649	93	415.544	402.663	0.979473		9.19549	93
9.29444	94	417.315	406.558	0.897059		9.29908	94	433.5	420.853	0.996661		9.29808	94	378.607	368.46	0.918777		9.29908	94	297.918	285.889	0.928879		9.30473	94	356.674	345.204	0.95087		9.29808	94	324.737	315.264	0.984608		9.30109	94	366.267	354.32	0.879971		9.29644	94	402.151	389.27	0.946895		9.29544	94
9.3944	95	411.002	400.245	0.88313		9.39993	95	418.065	405.418	0.960108		9.39793	95	380.445	370.298	0.923361		9.39993	95	316.486	304.457	0.989208		9.40446	95	360.854	349.384	0.962384		9.39893	95	311.999	302.526	0.944826		9.40093	95	365.92	353.973	0.879109		9.3974	95	415.954	403.073	0.980471		9.3954	95
9.49536	96	422.956	412.199	0.909506		9.49978	96	414.432	401.785	0.951504		9.49878	96	384.519	374.372	0.933519		9.49978	96	314.35	302.321	0.982268		9.5042	96	350.552	339.082	0.934007		9.49878	96	317.935	308.462	0.963365		9.50078	96	376.958	365.011	0.906522		9.49636	96	399.579	386.698	0.940639		9.49536	96
9.59531	97	417.285	406.528	0.896993		9.59962	97	425.395	412.748	0.977467		9.59862	97	378.064	367.917	0.917423		9.59962	97	310.373	298.344	0.969347		9.60393	97	365.428	353.958	0.974983		9.59862	97	310.547	301.074	0.940291		9.60062	97	370.146	358.199	0.889605		9.59631	97	408.715	395.834	0.962862		9.59531	97
9.69527	98	420.447	409.69	0.90397		9.69947	98	423.547	410.9	0.97309		9.69847	98	367.079	356.932	0.890032		9.69947	98	307.914	295.885	0.961357		9.70467	98	356.86	345.39	0.951382		9.69847	98	310.921	301.448	0.941459		9.70047	98	368.299	356.352	0.885017		9.69627	98	401.697	388.816	0.945791		9.69527	98
9.79523	99	422.609	411.852	0.90874		9.79932	99	415.768	403.121	0.954668		9.79832	99	377.134	366.987	0.915104		9.79932	99	308.587	296.558	0.963544		9.80441	99	363.251	351.781	0.968986		9.79832	99	316.013	306.54	0.957362		9.80132	99	373.504	361.557	0.897944		9.79623	99	406.912	394.031	0.958476		9.79523	99
9.89518	100	424.013	413.256	0.911838		9.90016	100	412.454	399.807	0.94682		9.89816	100	380.718	370.571	0.924041		9.90016	100	306.377	294.348	0.956363		9.90414	100	365.311	353.841	0.97466		9.89916	100	329.064	319.591	0.998122		9.90116	100	376.014	364.067	0.904178		9.89618	100	402.746	389.865	0.948342		9.89518	100
9.99514	101	423.342	412.585	0.910357		10	101	400.081	387.434	0.917518		9.99901	101	383.424	373.277	0.930789		10	101	301.742	289.713	0.941304		10.0049	101	365.874	354.404	0.976211		9.99901	101	320.958	311.485	0.972806		10.001	101	365.632	353.685	0.878394		9.99614	101	405.306	392.425	0.95457		9.99614	101
10.0951	102	431.203	420.446	0.927703		10.0999	102	415.365	402.718	0.953714		10.0989	102	376.1	365.953	0.912526		10.0979	102	304.136	292.107	0.949082		10.1046	102	360.078	348.608	0.960246		10.0989	102	315.593	306.12	0.95605		10.1009	102	365.736	353.789	0.878652		10.0961	102	397.05	384.169	0.934487		10.0961	102
10.1951	103	423.516	412.759	0.910741		10.1997	103	420.403	407.756	0.965645		10.1987	103	375.299	365.152	0.910529		10.1997	103	300.846	288.817	0.938393		10.2044	103	356.516	345.046	0.950434		10.1977	103	314.061	304.588	0.951266		10.2007	103	369.05	357.103	0.886883		10.1961	103	420.203	407.322	0.990806		10.1961	103
10.295	104	421.502	410.745	0.906298		10.2995	104	416.828	404.181	0.957179		10.2985	104	369.144	358.997	0.895181		10.2995	104	297.19	285.161	0.926514		10.3051	104	350.766	339.296	0.934596		10.2985	104	310.319	300.846	0.939579		10.3015	104	371.848	359.901	0.893832		10.297	104	400.41	387.529	0.94266		10.296	104
10.395	105	421.4	410.643	0.906072		10.4004	105	426.605	413.958	0.980332		10.3984	105	383.119	372.972	0.930028		10.4004	105	306.395	294.366	0.956422		10.4048	105	353.105	341.635	0.941039		10.3994	105	309.124	299.651	0.935847		10.4014	105	367.51	355.563	0.883058		10.397	105	410.5	397.619	0.967204		10.396	105
10.4949	106	418.666	407.909	0.90004		10.5002	106	417.47	404.823	0.958699		10.4992	106	363.419	353.272	0.880905		10.5002	106	303.255	291.226	0.94622		10.5046	106	346.877	335.407	0.923884		10.4992	106	307.156	297.683	0.929701		10.5012	106	348.393	336.446	0.83558		10.4969	106	398.849	385.968	0.938863		10.4939	106
10.5949	107	432.268	421.511	0.930052		10.5981	107	425.947	413.3	0.978774		10.5991	107	371.686	361.539	0.90152		10.5981	107	305.413	293.384	0.953231		10.6033	107	343.107	331.637	0.913499		10.5991	107	315.292	305.819	0.95511		10.6011	107	362.074	350.127	0.869557		10.5969	107	387.962	375.081	0.912381		10.5959	107
10.6958	108	422.037	411.28	0.907478		10.6999	108	429.849	417.202	0.988015		10.6989	108	377.284	367.137	0.915479		10.6999	108	303.053	291.024	0.945563		10.705	108	355.731	344.261	0.948272		10.6989	108	316.696	307.223	0.959495		10.7009	108	358.593	346.646	0.860912		10.6968	108	386.473	373.592	0.908759		10.6958	108
10.7958	109	419.898	409.141	0.902758		10.7988	109	425.844	413.197	0.97853		10.7988	109	373.555	363.408	0.90618		10.7988	109	294.684	282.655	0.918372		10.8038	109	343.011	331.541	0.913235		10.7988	109	309.603	300.13	0.937343		10.8018	109	363.323	351.376	0.872659		10.7948	109	386.396	373.515	0.908571		10.7948	109
10.8958	110	422.466	411.709	0.908425		10.9006	110	426.9	414.253	0.981031		10.8986	110	385.755	375.608	0.936601		10.9006	110	310.279	298.25	0.969041		10.9045	110	349.374	337.904	0.930762		10.8976	110	314.766	305.293	0.953468		10.9016	110	371.275	359.328	0.892408		10.8968	110	389.046	376.165	0.915017		10.8958	110
10.9937	111	423.98	413.223	0.911765		11.0005	111	425.183	412.536	0.976965		10.9995	111	374.856	364.709	0.909424		11.0005	111	309.063	297.034	0.96509		11.0052	111	358.526	347.056	0.955971		10.9995	111	322.503	313.03	0.977631		11.0015	111	366.706	354.759	0.881061		10.9967	111	388.066	375.185	0.912633		10.9947	111
11.0957	112	422.715	411.958	0.908974		11.0983	112	430.845	418.198	0.990374		11.0993	112	374.461	364.314	0.908439		11.0983	112	301.264	289.235	0.939751		11.103	112	352.436	340.966	0.939196		11.0993	112	312.283	302.81	0.945713		11.1013	112	358.383	346.436	0.860391		11.0957	112	397.805	384.924	0.936324		11.0957	112
11.1956	113	410.669	399.912	0.882395		11.2002	113	434.697	422.05	0.999496		11.1972	113	371.019	360.872	0.899856		11.2002	113	305.027	292.998	0.951977		11.2047	113	363.613	352.143	0.969983		11.1982	113	310.518	301.045	0.940201		11.2012	113	381.406	369.459	0.917569		11.1966	113	398.178	385.297	0.937231		-8439.62	113
11.2956	114	412.085	401.328	0.885519		11.3	114	424.347	411.7	0.974985		11.299	114	376.233	366.086	0.912858		11.299	114	309.564	297.535	0.966718		11.3034	114	348.601	337.131	0.928632		11.299	114	317.998	308.525	0.963562		11.302	114	366.617	354.67	0.88084		11.2966	114	399.144	386.263	0.939581		11.2946	114
11.3955	115	437.211	426.454	0.940959		11.4009	115	418.816	406.169	0.961887		11.3979	115	375.546	365.399	0.911145		11.4009	115	303.743	291.714	0.947805		11.4052	115	353.653	342.183	0.942548		11.3979	115	320.075	310.602	0.970048		11.3999	115	366.904	354.957	0.881553		11.3965	115	395.027	382.146	0.929566		11.3965	115
11.4945	116	421.032	410.275	0.90526		11.4987	116	418.134	405.487	0.960271		11.4977	116	382.522	372.375	0.92854		11.5007	116	305.534	293.505	0.953624		11.5039	116	359.121	347.651	0.95761		11.4997	116	313.521	304.048	0.949579		11.5017	116	377.875	365.928	0.9088		11.4955	116	393.931	381.05	0.9269		11.4945	116
11.5954	117	431.714	420.957	0.92883		11.5986	117	419.413	406.766	0.9633		11.5976	117	371.796	361.649	0.901794		11.5986	117	309.379	297.35	0.966117		11.6037	117	354.247	342.777	0.944184		11.5976	117	313.875	304.402	0.950685		11.6016	117	367.157	355.21	0.882181		11.5954	117	395.68	382.799	0.931154		11.5964	117
11.6954	118	421.29	410.533	0.90583		11.6994	118	431.568	418.921	0.992086		11.6974	118	376.533	366.386	0.913606		11.6994	118	308.228	296.199	0.962377		11.7054	118	357.412	345.942	0.952902		11.6984	118	314.212	304.739	0.951737		11.7014	118	384.021	372.074	0.924064		11.6974	118	400.648	387.767	0.943239		11.6944	118
11.7964	119	417.842	407.085	0.898222		11.7992	119	419.849	407.202	0.964333		11.7982	119	381.405	371.258	0.925754		11.7992	119	305.695	293.666	0.954148		11.8041	119	353.638	342.168	0.942507		11.7992	119	313.196	303.723	0.948564		11.8022	119	363.162	351.215	0.872259		11.7954	119	397.11	384.229	0.934633		11.7944	119
11.8943	120	427.263	416.506	0.919009		11.9011	120	409.209	396.562	0.939135		11.8981	120	358.621	348.474	0.868941		11.9011	120	310.823	298.794	0.970809		11.9039	120	347.45	335.98	0.925462		11.8981	120	316.298	306.825	0.958252		11.9001	120	379.573	367.626	0.913017		11.8973	120	387.957	375.076	0.912368		11.8953	120
11.9943	121	428.716	417.959	0.922215		11.9989	121	426.749	414.102	0.980673		11.9979	121	376.644	366.497	0.913883		11.9989	121	299.133	287.104	0.932827		12.0036	121	358.917	347.447	0.957048		11.9999	121	317.498	308.025	0.962		11.9999	121	371.14	359.193	0.892073		11.9973	121	406.202	393.321	0.956749		11.9953	121
12.0942	122	436.433	425.676	0.939242		12.0988	122	424.416	411.769	0.975148		12.0978	122	373.803	363.656	0.906798		12.0988	122	306.541	294.512	0.956896		12.1033	122	366.225	354.755	0.977178		12.0978	122	317.618	308.145	0.962375		12.1008	122	357.973	346.026	0.859372		12.0952	122	405.23	392.349	0.954385		12.0962	122
12.1942	123	423.234	412.477	0.910119		12.1996	123	430.958	418.311	0.990641		12.1976	123	366.778	356.631	0.889281		12.1996	123	310.762	298.733	0.970611		12.2051	123	354.803	343.333	0.945716		12.1976	123	313.237	303.764	0.948692		12.2016	123	362.794	350.847	0.871345		12.1962	123	395.509	382.628	0.930739		12.1952	123
12.2961	124	431.131	420.374	0.927544		12.2995	124	425.857	413.21	0.978561		12.2975	124	378.683	368.536	0.918967		12.2995	124	309.778	297.749	0.967414		12.3038	124	357.296	345.826	0.952583		12.2985	124	313.365	303.892	0.949092		12.3005	124	367.672	355.725	0.88346		12.2961	124	394.444	381.563	0.928148		12.2951	124
12.3941	125	417.434	406.677	0.897322		12.3993	125	421.584	408.937	0.968442		12.3983	125	373.288	363.141	0.905514		12.3993	125	309.587	297.558	0.966793		12.4035	125	354.402	342.932	0.944611		12.3983	125	309.259	299.786	0.936269		12.4003	125	371.241	359.294	0.892324		12.3971	125	394.259	381.378	0.927698		12.3951	125
12.4941	126	405.321	394.564	0.870595		12.4992	126	431.959	419.312	0.993012		12.4982	126	387.592	377.445	0.941182		12.4992	126	308.991	296.962	0.964857		12.5043	126	365.832	354.362	0.976095		12.4982	126	315.506	306.033	0.955779		12.5022	126	366.663	354.716	0.880954		12.4961	126	389.463	376.582	0.916032		12.4951	126
12.596	127	414.9	404.143	0.89173		12.599	127	423.815	411.168	0.973725		12.598	127	378.078	367.931	0.917458		12.599	127	312.641	300.612	0.976716		12.604	127	350.093	338.623	0.932742		12.598	127	322.889	313.416	0.978837		12.6	127	368.636	356.689	0.885854		12.596	127	389.698	376.817	0.916603		12.597	127
12.695	128	410.101	399.344	0.881142		12.6999	128	438.089	425.442	1.00753		12.6979	128	375.647	365.5	0.911397		12.6999	128	296.411	284.382	0.923983		12.7038	128	350.435	338.965	0.933684		12.6979	128	322.316	312.843	0.977047		12.7009	128	373.513	361.566	0.897967		12.698	128	389.537	376.656	0.916212		12.695	128
12.7949	129	423.235	412.478	0.910121		12.7997	129	420.712	408.065	0.966377		12.7977	129	371.561	361.414	0.901208		12.7997	129	304.987	292.958	0.951847		12.8045	129	353.172	341.702	0.941223		12.7987	129	311.02	301.547	0.941768		12.8017	129	357.801	345.854	0.858945		12.7959	129	386.053	373.172	0.907737		12.7949	129
12.8949	130	419.074	408.317	0.90094		12.8996	130	421.156	408.509	0.967428		12.8986	130	368.327	358.18	0.893144		12.8996	130	315.022	302.993	0.984452		12.9042	130	347.845	336.375	0.92655		12.8986	130	317.842	308.369	0.963074		12.9006	130	356.741	344.794	0.856313		12.8959	130	389.019	376.138	0.914952		12.8949	130
12.9948	131	417.849	407.092	0.898237		12.9994	131	427.352	414.705	0.982101		12.9984	131	370.749	360.602	0.899183		12.9994	131	304.804	292.775	0.951253		13.004	131	350.743	339.273	0.934533		12.9984	131	316.799	307.326	0.959817		13.0004	131	365.925	353.978	0.879121		12.9958	131	395.136	382.255	0.929831		12.9948	131
13.0968	132	416.647	405.89	0.895585		13.0992	132	425.898	413.251	0.978658		13.0982	132	378.956	368.809	0.919648		13.0992	132	307.876	295.847	0.961234		13.1047	132	355.037	343.567	0.946361		13.0982	132	317.133	307.66	0.96086		13.1002	132	372.251	360.304	0.894832		13.0958	132	388.706	375.825	0.91419		13.0958	132
13.1948	133	425.21	414.453	0.914479		13.1991	133	435.166	422.519	1.00061		13.1981	133	378.291	368.144	0.91799		13.1991	133	303.487	291.458	0.946974		13.2044	133	359.153	347.683	0.957698		13.1981	133	330.808	321.335	1.00357		13.2011	133	360.638	348.691	0.865991		13.1958	133	383.594	370.713	0.901755		13.1958	133
13.2947	134	417.116	406.359	0.89662		13.2999	134	427.845	415.198	0.983269		13.2979	134	374.961	364.814	0.909686		13.2999	134	294.843	282.814	0.918888		13.3042	134	355.884	344.414	0.948694		13.2989	134	304.123	294.65	0.920228		13.3009	134	363.128	351.181	0.872175		13.2957	134	379.094	366.213	0.890809		13.2957	134
13.3947	135	418.031	407.274	0.898639		13.3998	135	440.986	428.339	1.01439		13.3988	135	378.329	368.182	0.918084		13.3998	135	308.996	296.967	0.964873		13.4039	135	356.262	344.792	0.949735		13.3988	135	316.665	307.192	0.959398		13.4008	135	364.12	352.173	0.874639		13.3967	135	377.991	365.11	0.888126		13.3957	135
13.4946	136	410.385	399.628	0.881768		13.4996	136	428.234	415.587	0.98419		13.4986	136	377.385	367.238	0.91573		13.4996	136	302.896	290.867	0.945053		13.5046	136	342.491	331.021	0.911802		13.4986	136	311.055	301.582	0.941878		13.5006	136	358.07	346.123	0.859613		13.4966	136	388.369	375.488	0.913371		13.4956	136
13.5946	137	402.501	391.744	0.864372		13.5995	137	432.16	419.513	0.993488		13.5985	137	370.24	360.093	0.897914		13.5995	137	301.191	289.162	0.939514		13.6044	137	355.481	344.011	0.947584		13.5985	137	315.781	306.308	0.956638		13.6005	137	362.079	350.132	0.86957		13.5966	137	385.809	372.928	0.907143		13.5956	137
13.6955	138	416.008	405.251	0.894175		13.6993	138	432.524	419.877	0.99435		13.6973	138	370.009	359.862	0.897338		13.6993	138	310.514	298.485	0.969805		13.7041	138	353.795	342.325	0.942939		13.6983	138	307.92	298.447	0.932087		13.7013	138	354.242	342.295	0.850106		13.6965	138	384.212	371.331	0.903259		13.6955	138
13.7955	139	407.692	396.935	0.875826		13.8002	139	435.788	423.141	1.00208		13.7982	139	368.301	358.154	0.893079		13.8002	139	308.861	296.832	0.964434		13.8049	139	359.896	348.426	0.959745		13.7992	139	314.467	304.994	0.952534		13.8012	139	347.748	335.801	0.833978		13.7965	139	387.4	374.519	0.911013		13.7945	139
13.8954	140	417.709	406.952	0.897928		13.9	140	437.802	425.155	1.00685		13.899	140	369.723	359.576	0.896625		13.9	140	302.6	290.571	0.944092		13.9046	140	355.788	344.318	0.948429		13.899	140	323.174	313.701	0.979727		13.901	140	358.665	346.718	0.861091		13.8965	140	379.659	366.778	0.892184		13.8954	140
13.9954	141	418.603	407.846	0.899901		13.9999	141	439.975	427.328	1.012		13.9969	141	373.314	363.167	0.905579		13.9999	141	310.778	298.749	0.970663		14.0043	141	362.106	350.636	0.965832		13.9989	141	310.005	300.532	0.938598		14.0009	141	362.625	350.678	0.870926		13.9964	141	391.537	378.656	0.921077		13.9954	141
14.0954	142	412.571	401.814	0.886592		14.0997	142	440.338	427.691	1.01285		14.0987	142	386.44	376.293	0.93831		14.0987	142	299.813	287.784	0.935036		14.1031	142	359.551	348.081	0.958794		14.0987	142	331.152	321.679	1.00464		14.1007	142	358.926	346.979	0.861739		14.0964	142	392.677	379.796	0.92385		14.0954	142
14.1953	143	409.534	398.777	0.87989		14.1996	143	442.431	429.784	1.01781		14.1976	143	382.868	372.721	0.929403		14.1996	143	309.761	297.732	0.967358		14.2048	143	351.649	340.179	0.937028		14.1986	143	315.333	305.86	0.955238		14.2016	143	354.061	342.114	0.849657		14.1963	143	390.114	377.233	0.917615		14.1953	143
14.2953	144	414.394	403.637	0.890614		14.3004	144	440.531	427.884	1.01331		14.2984	144	370.768	360.621	0.89923		14.3004	144	314.697	302.668	0.983396		14.3045	144	353.916	342.446	0.943273		14.2994	144	306.744	297.271	0.928414		14.3014	144	342.713	330.766	0.821473		14.2963	144	393.863	380.982	0.926735		14.2943	144
14.3952	145	411.192	400.435	0.883549		14.4003	145	443.415	430.768	1.02014		14.3972	145	372.119	361.972	0.902599		14.4003	145	311.266	299.237	0.972248		14.4053	145	353.291	341.821	0.941551		14.3993	145	325.364	315.891	0.986567		14.4013	145	345.859	333.912	0.829287		14.3962	145	388.627	375.746	0.913998		14.3962	145
14.4952	146	423.982	413.225	0.91177		14.4981	146	441.121	428.474	1.01471		14.4971	146	378.255	368.108	0.9179		14.5001	146	308.436	296.407	0.963053		14.505	146	356.221	344.751	0.949622		14.4991	146	326.493	317.02	0.990093		14.5011	146	341.963	330.016	0.819611		14.4962	146	389.059	376.178	0.915049		14.4942	146
14.5951	147	417.326	406.569	0.897083		14.5989	147	434.261	421.614	0.998463		14.5989	147	373.889	363.742	0.907013		14.5989	147	294.811	282.782	0.918784		14.6037	147	352.685	341.215	0.939882		14.5989	147	307.115	297.642	0.929573		14.6009	147	362.37	350.423	0.870292		14.5951	147	395.14	382.259	0.929841		14.5961	147
14.6951	148	415.469	404.712	0.892986		14.6988	148	433.79	421.143	0.997348		14.6978	148	379.635	369.488	0.921341		14.6998	148	308.171	296.142	0.962192		14.7045	148	359.522	348.052	0.958715		14.6978	148	312.394	302.921	0.94606		14.7018	148	348.251	336.304	0.835227		14.6971	148	382.306	369.425	0.898622		14.6941	148
14.7951	149	412.976	402.219	0.887485		14.7986	149	421.447	408.8	0.968117		14.7986	149	371.441	361.294	0.900909		14.8006	149	301.753	289.724	0.94134		14.8032	149	351.172	339.702	0.935714		14.7996	149	307.795	298.322	0.931696		14.8016	149	355.174	343.227	0.852421		14.7951	149	410.825	397.944	0.967995		14.7941	149
14.896	150	400.279	389.522	0.85947		14.9005	150	435.878	423.231	1.00229		14.8995	150	375.58	365.433	0.911229		14.9005	150	318.27	306.241	0.995005		14.905	150	352.996	341.526	0.940739		14.8995	150	334.618	325.145	1.01547		14.8995	150	348.702	336.755	0.836347		14.897	150	395.998	383.117	0.931928		14.896	150
14.994	151	402.339	391.582	0.864015		15.0003	151	433.495	420.848	0.996649		14.9973	151	384.206	374.059	0.932739		14.9983	151	304.101	292.072	0.948968		15.0037	151	351.531	340.061	0.936703		14.9993	151	327.403	317.93	0.992935		15.0013	151	359.157	347.21	0.862313		14.995	151	399.618	386.737	0.940734		14.995	151
15.0959	152	423.928	413.171	0.91165		15.0992	152	434.386	421.739	0.998759		15.0972	152	378.265	368.118	0.917925		15.0992	152	305.786	293.757	0.954443		15.1034	152	355.245	343.775	0.946933		15.0992	152	314.678	305.205	0.953193		15.1002	152	362.226	350.279	0.869935		15.0969	152	391.236	378.355	0.920344		15.0959	152
15.1939	153	415.523	404.766	0.893105		15.2	153	429.453	416.806	0.987077		15.198	153	385.951	375.804	0.93709		15.2	153	307.457	295.428	0.959872		15.2052	153	363.607	352.137	0.969967		15.198	153	308.074	298.601	0.932568		15.202	153	355.932	343.985	0.854303		15.1969	153	395.673	382.792	0.931137		15.1949	153
15.2958	154	412.168	401.411	0.885702		15.2989	154	433.053	420.406	0.995603		15.2989	154	381.125	370.978	0.925056		15.2989	154	301.647	289.618	0.940995		15.3039	154	358.606	347.136	0.956191		15.2999	154	315.388	305.915	0.95541		15.3019	154	353.897	341.95	0.849249		15.2958	154	396.843	383.962	0.933983		15.2948	154
15.3938	155	415.532	404.775	0.893125		15.4007	155	434.952	422.305	1.0001		15.3977	155	378.441	368.294	0.918364		15.4007	155	311.453	299.424	0.972856		15.4056	155	365.291	353.821	0.974605		15.3977	155	310.719	301.246	0.940828		15.3997	155	352.106	340.159	0.844801		15.3968	155	390.65	377.769	0.918919		15.3958	155
15.4938	156	410.714	399.957	0.882494		15.4986	156	433.719	421.072	0.99718		15.4976	156	375.709	365.562	0.911551		15.4986	156	321.181	309.152	1.00446		15.5034	156	349.647	338.177	0.931514		15.4996	156	311.157	301.684	0.942196		15.5016	156	348.851	336.904	0.836717		15.4958	156	394.9	382.019	0.929257		15.4948	156
15.5947	157	414.594	403.837	0.891055		15.5994	157	431.199	418.552	0.991212		15.5974	157	372.698	362.551	0.904043		15.5994	157	311.482	299.453	0.97295		15.6041	157	359.994	348.524	0.960015		15.5984	157	307.068	297.595	0.929426		15.6004	157	349.002	337.055	0.837092		15.5957	157	389.954	377.073	0.917226		15.5947	157
15.6957	158	418.727	407.97	0.900175		15.6993	158	428.749	416.102	0.98541		15.6983	158	378.439	368.292	0.918359		15.6993	158	312.155	300.126	0.975137		15.7038	158	343.678	332.208	0.915072		15.6983	158	316.875	307.402	0.960054		15.7023	158	346.1	334.153	0.829885		15.6957	158	394.12	381.239	0.92736		15.6947	158
15.7956	159	407.047	396.29	0.874403		15.7991	159	435.744	423.097	1.00198		15.7981	159	366.957	356.81	0.889728		15.7991	159	307.118	295.089	0.958771		15.8036	159	354.131	342.661	0.943865		15.8001	159	322.988	313.515	0.979146		15.8021	159	335.275	323.328	0.803001		15.7956	159	392.941	380.06	0.924492		15.7946	159
15.8946	160	425.232	414.475	0.914528		15.9009	160	420.427	407.78	0.965702		15.8979	160	392.602	382.455	0.953675		15.9009	160	308.563	296.534	0.963466		15.9053	160	353.85	342.38	0.943091		15.8979	160	316.434	306.961	0.958677		15.8999	160	358.602	346.655	0.860934		15.8956	160	406.477	393.596	0.957418		15.8946	160
15.9945	161	417.333	406.576	0.897099		15.9988	161	429.47	416.823	0.987117		15.9978	161	369.715	359.568	0.896605		15.9988	161	307.579	295.55	0.960269		16.004	161	355.831	344.361	0.948548		15.9978	161	319.26	309.787	0.967503		16.0018	161	335.721	323.774	0.804108		15.9955	161	403.127	390.246	0.949269		15.9945	161
16.0945	162	422.616	411.859	0.908756		16.0996	162	425.312	412.665	0.97727		16.0976	162	379.894	369.747	0.921987		16.0996	162	298.513	286.484	0.930813		16.1038	162	353.868	342.398	0.94314		16.0976	162	318.838	309.365	0.966185		16.1006	162	343.273	331.326	0.822864		16.0955	162	398.647	385.766	0.938372		16.0945	162
16.1945	163	418.791	408.034	0.900316		16.1995	163	433.555	420.908	0.996791		16.1975	163	366.307	356.16	0.888107		16.1995	163	311.135	299.106	0.971823		16.2035	163	350.019	338.549	0.932538		16.1985	163	312.217	302.744	0.945507		16.2025	163	345.145	333.198	0.827513		16.1955	163	408.901	396.02	0.963314		16.1955	163
16.2964	164	424.86	414.103	0.913707		16.2993	164	437.1	424.453	1.00519		16.2983	164	379.205	369.058	0.920269		16.2993	164	308.511	296.482	0.963297		16.3043	164	353.953	342.483	0.943375		16.2993	164	314.319	304.846	0.952072		16.3003	164	347.448	335.501	0.833233		16.2954	164	393.283	380.402	0.925324		16.2954	164
16.3944	165	407.35	396.593	0.875072		16.3992	165	414.691	402.044	0.952118		16.3982	165	373.725	363.578	0.906604		16.3992	165	299.301	287.272	0.933373		16.406	165	358.121	346.651	0.954855		16.3982	165	320.54	311.067	0.971501		16.4002	165	340.358	328.411	0.815625		16.3954	165	399.143	386.262	0.939578		16.3954	165
16.4943	166	414.278	403.521	0.890358		16.499	166	426.215	413.568	0.979409		16.498	166	386.167	376.02	0.937629		16.499	166	299.467	287.438	0.933912		16.5037	166	363.765	352.295	0.970402		16.498	166	321.044	311.571	0.973075		16.5	166	338.586	326.639	0.811224		16.4963	166	396.364	383.483	0.932818		16.4953	166
16.5943	167	422.739	411.982	0.909027		16.5999	167	435.188	422.541	1.00066		16.5979	167	370.097	359.95	0.897557		16.5999	167	301.138	289.109	0.939341		16.6045	167	367.692	356.222	0.981219		16.5979	167	305.717	296.244	0.925207		16.6009	167	342.93	330.983	0.822012		16.5963	167	386.482	373.601	0.90878		16.5953	167
16.6942	168	414.017	403.26	0.889782		16.6997	168	423.765	411.118	0.973607		16.6977	168	380.721	370.574	0.924049		16.6997	168	309.875	297.846	0.967729		16.7042	168	360.026	348.556	0.960103		16.6987	168	314.739	305.266	0.953383		16.7007	168	329.077	317.13	0.787608		16.6972	168	401.066	388.185	0.944256		16.6952	168
16.7962	169	400.395	389.638	0.859726		16.7996	169	434.529	421.882	0.999098		16.7986	169	368.269	358.122	0.892999		16.7996	169	305.121	293.092	0.952283		16.8039	169	365.244	353.774	0.974476		16.7986	169	312.739	303.266	0.947137		16.8006	169	331.699	319.752	0.79412		16.7962	169	393.174	380.293	0.925059		16.7952	169
16.8951	170	412.3	401.543	0.885994		16.8994	170	428.345	415.698	0.984453		16.8984	170	372.167	362.02	0.902719		16.8994	170	298.61	286.581	0.931128		16.9047	170	364.509	353.039	0.972451		16.8984	170	321.82	312.347	0.975498		16.9004	170	336.407	324.46	0.805812		16.8961	170	388.505	375.624	0.913701		16.8951	170
16.9951	171	421.986	411.229	0.907365		16.9993	171	412.251	399.604	0.946339		16.9983	171	375.707	365.56	0.911546		16.9993	171	307.094	295.065	0.958693		17.0044	171	356.064	344.594	0.949189		16.9983	171	311.901	302.428	0.94452		17.0003	171	332.039	320.092	0.794964		16.9961	171	400.521	387.64	0.94293		16.9951	171
17.0951	172	403.375	392.618	0.866301		17.0991	172	435.315	422.668	1.00096		17.0981	172	377.789	367.642	0.916738		17.1001	172	292.744	280.715	0.912069		17.1041	172	369.785	358.315	0.986984		17.0981	172	308.473	299	0.933814		17.1011	172	336.951	325.004	0.807163		17.0961	172	388.147	375.266	0.912831		17.0951	172
17.195	173	400.825	390.068	0.860674		17.2	173	427.935	415.288	0.983482		17.1979	173	366.297	356.15	0.888082		17.2	173	306.43	294.401	0.956536		17.2039	173	364.462	352.992	0.972322		17.1989	173	321.895	312.422	0.975732		17.201	173	335.148	323.201	0.802685		17.196	173	398.75	385.869	0.938622		17.195	173
17.295	174	406.67	395.913	0.873571		17.2998	174	423.084	410.437	0.971994		17.2988	174	375.489	365.342	0.911003		17.2998	174	315.398	303.369	0.985673		17.3046	174	367.99	356.52	0.98204		17.2988	174	317.273	307.8	0.961297		17.3008	174	328.89	316.943	0.787143		17.296	174	400.644	387.763	0.943229		17.295	174
17.3949	175	406.308	395.551	0.872772		17.3996	175	421.702	409.055	0.968721		17.3986	175	372.864	362.717	0.904457		17.3996	175	300.251	288.222	0.936459		17.4044	175	350.155	338.685	0.932913		17.3986	175	310.669	301.196	0.940672		17.4006	175	319.446	307.499	0.763689		17.3959	175	399.744	386.863	0.94104		17.3959	175
17.4949	176	407.558	396.801	0.87553		17.4995	176	445.039	432.392	1.02399		17.4985	176	367.721	357.574	0.891633		17.4995	176	306.431	294.402	0.956539		17.5041	176	354.835	343.365	0.945804		17.4985	176	332.477	323.004	1.00878		17.5005	176	331.826	319.879	0.794435		17.4959	176	400.47	387.589	0.942806		17.4959	176
17.5948	177	402.743	391.986	0.864906		17.5983	177	427.747	415.1	0.983037		17.5983	177	367.116	356.969	0.890124		17.5993	177	310.481	298.452	0.969698		17.6028	177	344.585	333.115	0.91757		17.5983	177	316.782	307.309	0.959764		17.6013	177	335.565	323.618	0.803721		17.5968	177	411.769	398.888	0.970291		17.5958	177
17.6948	178	396.779	386.022	0.851747		17.7002	178	433.083	420.436	0.995674		17.6982	178	380.384	370.237	0.923209		17.7002	178	302.929	290.9	0.945161		17.7046	178	358.681	347.211	0.956398		17.6992	178	317.538	308.065	0.962125		17.7012	178	340.439	328.492	0.815826		17.6968	178	406.023	393.142	0.956314		17.6958	178
17.7948	179	409.417	398.66	0.879632		17.798	179	430.678	418.031	0.989978		17.799	179	375.459	365.312	0.910928		17.8	179	306.176	294.147	0.95571		17.8043	179	345.155	333.685	0.91914		17.799	179	321.672	312.199	0.975036		17.801	179	324.716	312.769	0.776777		17.7968	179	400.304	387.423	0.942402		17.7938	179
17.8947	180	403.474	392.717	0.866519		17.8999	180	435.312	422.665	1.00095		17.8989	180	387.045	376.898	0.939818		17.8999	180	306.803	294.774	0.957748		17.905	180	359.846	348.376	0.959607		17.8989	180	324.789	315.316	0.984771		17.9009	180	338.797	326.85	0.811748		17.8967	180	401.297	388.416	0.944818		17.8957	180
17.9937	181	399.364	388.607	0.857451		17.9997	181	441.782	429.135	1.01627		17.9987	181	371.527	361.38	0.901123		17.9997	181	310.673	298.644	0.970322		18.0048	181	346.094	334.624	0.921727		17.9987	181	316.46	306.987	0.958758		18.0007	181	338.431	326.484	0.810839		17.9967	181	387.458	374.577	0.911155		17.9957	181
18.0956	182	397.225	386.468	0.852731		18.0986	182	425.268	412.621	0.977166		18.0986	182	376.893	366.746	0.914504		18.0986	182	311.994	299.965	0.974614		18.1045	182	346.387	334.917	0.922534		18.0986	182	305.358	295.885	0.924085		18.1016	182	332.834	320.887	0.796938		18.0966	182	404.005	391.124	0.951405		18.0956	182
18.1956	183	401.642	390.885	0.862477		18.2004	183	434.696	422.049	0.999493		18.1984	183	368.851	358.704	0.89445		18.2004	183	305.922	293.893	0.954885		18.2052	183	347.55	336.08	0.925737		18.1974	183	321.951	312.478	0.975907		18.2014	183	332.15	320.203	0.79524		18.1966	183	393.792	380.911	0.926562		18.1956	183
18.2955	184	400.437	389.68	0.859818		18.3003	184	440.013	427.366	1.01209		18.2993	184	367.132	356.985	0.890164		18.3003	184	291.135	279.106	0.906841		18.305	184	345.31	333.84	0.919567		18.2993	184	308.787	299.314	0.934794		18.3013	184	324.561	312.614	0.776392		18.2965	184	394.393	381.512	0.928024		18.2945	184
18.3955	185	412.429	401.672	0.886278		18.4001	185	438.587	425.94	1.00871		18.3991	185	374.286	364.139	0.908003		18.4001	185	304.677	292.648	0.95084		18.4047	185	348.623	337.153	0.928693		18.3971	185	311.79	302.317	0.944173		18.4011	185	333.349	321.402	0.798217		18.3965	185	396.083	383.202	0.932135		18.3955	185
18.4955	186	410.682	399.925	0.882423		18.499	186	433.048	420.401	0.995591		18.497	186	373.991	363.844	0.907267		18.5	186	299.23	287.201	0.933142		18.5045	186	352.415	340.945	0.939138		18.499	186	314.255	304.782	0.951872		18.501	186	328.186	316.239	0.785395		18.4965	186	392.463	379.582	0.923329		18.4965	186
18.5954	187	400.663	389.906	0.860317		18.5998	187	433.556	420.909	0.996794		18.5988	187	371.832	361.685	0.901884		18.5988	187	297.363	285.334	0.927076		18.6032	187	354.649	343.179	0.945292		18.5988	187	316.002	306.529	0.957328		18.6018	187	330.422	318.475	0.790948		18.5954	187	388.958	376.077	0.914803		18.5964	187
18.6944	188	416.534	405.777	0.895336		18.7006	188	426.295	413.648	0.979598		18.6976	188	388.156	378.009	0.942589		18.7006	188	296.841	284.812	0.92538		18.7049	188	348.4	336.93	0.928079		18.6976	188	307.547	298.074	0.930922		18.7016	188	327.91	315.963	0.784709		18.6964	188	395.657	382.776	0.931099		18.6944	188
18.7953	189	416.882	406.125	0.896104		18.7985	189	442.524	429.877	1.01803		18.7995	189	377.282	367.135	0.915474		18.8005	189	299.498	287.469	0.934013		18.8047	189	352.773	341.303	0.940124		18.7995	189	317.304	307.831	0.961394		18.8015	189	329.263	317.316	0.78807		18.7973	189	406.716	393.835	0.957999		18.7943	189
18.8953	190	408.697	397.94	0.878044		18.9003	190	433.222	420.575	0.996003		18.8973	190	372.622	362.475	0.903854		18.9003	190	305.007	292.978	0.951912		18.9054	190	352.365	340.895	0.939		18.8993	190	318.573	309.1	0.965357		18.9013	190	338.494	326.547	0.810995		18.8973	190	403.926	391.045	0.951213		18.8963	190
18.9952	191	407.881	397.124	0.876243		18.9992	191	425.857	413.21	0.978561		18.9972	191	379.343	369.196	0.920613		18.9992	191	304.883	292.854	0.951509		19.0031	191	354.033	342.563	0.943595		18.9992	191	312.03	302.557	0.944923		19.0012	191	331.25	319.303	0.793004		18.9952	191	412.064	399.183	0.971008		18.9942	191
19.0952	192	407.123	396.366	0.874571		19.099	192	442.622	429.975	1.01826		19.099	192	366.342	356.195	0.888194		19.099	192	313.698	301.669	0.98015		19.1039	192	346.828	335.358	0.923749		19.099	192	311.473	302	0.943183		19.1	192	322.689	310.742	0.771743		19.0952	192	403.398	390.517	0.949928		19.0962	192
19.1942	193	397.437	386.68	0.853199		19.2009	193	434.477	421.83	0.998975		19.1979	193	370.556	360.409	0.898702		19.2009	193	307.406	295.377	0.959707		19.2056	193	347.423	335.953	0.925388		19.1979	193	312.134	302.661	0.945248		19.2019	193	326.683	314.736	0.781662		19.1972	193	392.012	379.131	0.922232		19.1952	193
19.2961	194	404.423	393.666	0.868613		19.2987	194	435.264	422.617	1.00084		19.2977	194	378.879	368.732	0.919456		19.2987	194	305.466	293.437	0.953403		19.3033	194	359.51	348.04	0.958681		19.2977	194	318.473	309	0.965045		19.3017	194	322.788	310.841	0.771989		19.2971	194	400.869	387.988	0.943777		19.2951	194
19.3961	195	405.768	395.011	0.871581		19.3986	195	427.913	415.266	0.98343		19.3976	195	369.914	359.767	0.897101		-7894	195	309.925	297.896	0.967891		19.4051	195	332.507	321.037	0.884301		19.3976	195	315.563	306.09	0.955957		19.4006	195	330.86	318.913	0.792036		19.3971	195	397.87	384.989	0.936482		19.3961	195
19.494	196	388.136	377.379	0.832676		19.4994	196	429.004	416.357	0.986014		19.4974	196	369.38	359.233	0.895769		19.4994	196	310.796	298.767	0.970721		19.5038	196	352.155	340.685	0.938422		19.4994	196	323.358	313.885	0.980302		19.5014	196	313.791	301.844	0.749644		19.496	196	391.364	378.483	0.920656		19.495	196
19.594	197	395.448	384.691	0.84881		19.5993	197	421.742	409.095	0.968816		19.5983	197	379.122	368.975	0.920062		19.5993	197	312.868	300.839	0.977453		19.6035	197	354.206	342.736	0.944071		19.5983	197	314.385	304.912	0.952278		19.6003	197	322.048	310.101	0.770151		19.596	197	389.335	376.454	0.91572		19.596	197
19.6939	198	407.117	396.36	0.874557		19.7011	198	430.319	417.672	0.989128		19.6981	198	383.097	372.95	0.929974		19.7011	198	318.074	306.045	0.994368		19.7053	198	352.477	341.007	0.939309		19.6981	198	320.588	311.115	0.97165		19.7021	198	330.758	318.811	0.791783		19.6969	198	397.113	384.232	0.93464		19.6949	198
19.7959	199	400.897	390.14	0.860833		19.799	199	426.38	413.733	0.9798		19.798	199	380.763	370.616	0.924154		19.799	199	308.756	296.727	0.964093		19.804	199	348.19	336.72	0.9275		19.8	199	306.719	297.246	0.928336		19.8	199	328.463	316.516	0.786083		19.7959	199	398.877	385.996	0.938931		19.7949	199
19.8948	200	404.952	394.195	0.86978		19.8988	200	427.028	414.381	0.981334		19.8978	200	381.297	371.15	0.925485		19.8988	200	297.597	285.568	0.927836		19.9038	200	348.82	337.35	0.929236		19.8978	200	315.754	306.281	0.956553		19.9008	200	316.919	304.972	0.757413		19.8968	200	383.571	370.69	0.901699		19.8948	200
[truncated: 12 more columns]

## Sheet: 2J 16hUV
Cell 00						Cell 01						Cell 02						Cell 03						Cell 04						Cell 05						Cell 06						Cell 07						Cell 08
	paste BG		average pre-bleach				paste BG		average pre-bleach				paste BG		average pre-bleach				paste BG		average pre-bleach				paste BG		average pre-bleach				paste BG		average pre-bleach				paste BG		average pre-bleach				paste BG		average pre-bleach				paste BG
	1	10.85	1130.66				1	11.108	608.812				1	10.249	513.486				1	10.778	619.505				1	13.806	513.915				1	12.635	546.799				1	12.584	330.312				1	14.533	402.803				1
	paste FRAP	RAW					paste FRAP	RAW					paste FRAP	RAW					paste FRAP	RAW					paste FRAP	RAW					paste FRAP	RAW					paste FRAP	RAW					paste FRAP	RAW					paste FRAP
Time	data here		minus BG	Normalized		Time	data here		minus BG	Normalized		Time	data here		minus BG	Normalized		Time	data here		minus BG	Normalized		Time	data here		minus BG	Normalized		Time	data here		minus BG	Normalized		Time	data here		minus BG	Normalized		Time	data here		minus BG	Normalized		Time	data here
0	1	1208.12	1197.28	1.05892		0	1	665.729	654.621	1.07524		0	1	540.505	530.256	1.03266		0	1	671.401	660.623	1.06637		0	1	574.719	560.913	1.09145		0	1	610.362	597.727	1.09314		0	1	358.094	345.51	1.04601		0	1	449.696	435.163	1.08034		0	1
0.0798342	2	1171.75	1160.9	1.02674		0.0798342	2	655.796	644.688	1.05893		0.0798342	2	547.25	537.001	1.04579		0.0798342	2	661.278	650.5	1.05003		0.0817251	2	549.706	535.9	1.04278		0.104416	2	597.519	584.884	1.06965		0.0798342	2	358.988	346.404	1.04872		0.0798342	2	450.435	435.902	1.08217		0.0817251	2
0.169674	3	1179.13	1168.28	1.03327		0.171676	3	653.144	642.036	1.05457		0.172676	3	543.841	533.592	1.03916		0.170675	3	658.339	647.561	1.04529		0.171455	3	543.609	529.803	1.03092		0.18425	3	586.418	573.783	1.04935		0.170675	3	348.052	335.468	1.01561		0.171676	3	445.653	431.12	1.0703		0.171455	3
0.271522	4	1166.39	1155.54	1.022		0.269521	4	632.33	621.222	1.02038		0.272523	4	541.169	530.92	1.03395		0.270521	4	665.209	654.431	1.05638		0.271191	4	550.466	536.66	1.04426		0.270088	4	562.92	550.285	1.00637		0.270521	4	351.51	338.926	1.02608		0.271522	4	433.991	419.458	1.04135		0.272192	4
0.370368	5	1155.71	1144.86	1.01256		0.370368	5	627.3	616.192	1.01212		0.372369	5	538.953	528.704	1.02964		0.370368	5	649.5	638.722	1.03102		0.371928	5	542.841	529.035	1.02942		0.371936	5	574.478	561.843	1.02751		0.370368	5	340.073	327.489	0.991453		0.372369	5	411.507	396.974	0.985528		0.371928	5
0.470214	6	1172.98	1162.13	1.02784		0.471215	6	642.488	631.38	1.03707		0.471215	6	543.006	532.757	1.03753		0.470214	6	664.737	653.959	1.05562		0.471664	6	539.193	525.387	1.02232		0.471782	6	558.534	545.899	0.998353		0.471215	6	336.755	324.171	0.981408		0.472215	6	437.033	422.5	1.0489		0.471664	6
0.57006	7	1160.99	1150.14	1.01723		0.57006	7	633.531	622.423	1.02236		0.572061	7	529.977	519.728	1.01216		0.57006	7	669.462	658.684	1.06324		0.5714	7	539.619	525.813	1.02315		0.571628	7	568.9	556.265	1.01731		0.571061	7	356.291	343.707	1.04055		0.572061	7	410.728	396.195	0.983594		0.5714	7
0.669907	8	1141.94	1131.09	1.00038		0.671908	8	633.596	622.488	1.02246		0.672908	8	518.807	508.558	0.990402		0.669907	8	650.369	639.591	1.03242		0.672136	8	521.999	508.193	0.988866		0.671474	8	577.703	565.068	1.03341		0.670907	8	336.839	324.255	0.981662		0.671908	8	420.922	406.389	1.0089		0.673137	8
0.769753	9	1121.58	1110.73	0.982372		0.769753	9	617.882	606.774	0.996652		0.770753	9	529.698	519.449	1.01161		0.770753	9	629.049	618.271	0.998008		0.771872	9	539.439	525.633	1.0228		0.772321	9	565.097	552.462	1.01036		0.770753	9	336.722	324.138	0.981308		0.771754	9	413.817	399.284	0.991263		0.771872	9
0.8706	10	1143.02	1132.17	1.00133		0.8706	10	613.178	602.07	0.988926		0.872601	10	512.596	502.347	0.978307		0.8706	10	620.1	609.322	0.983563		0.871608	10	537.23	523.424	1.0185		0.872168	10	564.992	552.357	1.01016		0.8706	10	345.001	332.417	1.00637		0.872601	10	409.543	395.01	0.980653		0.871608	10
0.970446	11	1133.82	1122.97	0.993199		0.970446	11	614.748	603.64	0.991505		0.971447	11	533.203	522.954	1.01844		0.970446	11	636.515	625.737	1.01006		0.972345	11	542.348	528.542	1.02846		0.972014	11	573.048	560.413	1.0249		0.971447	11	346.427	333.843	1.01069		0.972447	11	438.916	424.383	1.05357		0.972345	11
1.07029	12	1163.04	1152.19	1.01904		1.07029	12	626.878	615.77	1.01143		1.07229	12	523.324	513.075	0.999199		1.07029	12	640.272	629.494	1.01612		1.07208	12	524.031	510.225	0.99282		1.07186	12	557.885	545.25	0.997166		1.07129	12	342.78	330.196	0.999648		1.07229	12	418.46	403.927	1.00279		1.07208	12
1.17014	13	1112.11	1101.26	0.973994		1.17014	13	624.547	613.439	1.0076		1.17114	13	527.7	517.451	1.00772		1.17014	13	630.232	619.454	0.999918		1.17382	13	526.186	512.38	0.997014		1.17171	13	545.728	533.093	0.974933		1.17114	13	348.998	336.414	1.01847		1.17214	13	415.195	400.662	0.994684		1.17182	13
1.26998	14	1127.54	1116.69	0.987648		1.26998	14	624.661	613.553	1.00779		1.27099	14	519.28	509.031	0.991323		1.27099	14	621.907	611.129	0.98648		1.27255	14	531.894	518.088	1.00812		1.27255	14	549.754	537.119	0.982296		1.27099	14	332.518	319.934	0.968581		1.27199	14	415.241	400.708	0.994798		1.27255	14
1.37083	15	1152.07	1141.22	1.00934		1.36983	15	607.604	596.496	0.97977		1.37283	15	517.669	507.42	0.988186		1.37083	15	638.795	628.017	1.01374		1.37229	15	531.893	518.087	1.00812		1.3724	15	569.432	556.797	1.01828		1.37083	15	347.718	335.134	1.0146		1.37283	15	413.095	398.562	0.989471		1.37229	15
1.47068	16	1151.58	1140.73	1.0089		1.47068	16	626.289	615.181	1.01046		1.47068	16	524.713	514.464	1.0019		1.47068	16	630.258	619.48	0.99996		1.47203	16	531.964	518.158	1.00826		1.47225	16	552.39	539.755	0.987117		1.47168	16	346.256	333.672	1.01017		1.47068	16	399.59	385.057	0.955943		1.47203	16
1.57052	17	1138.42	1127.58	0.997272		1.57052	17	623.459	612.351	1.00581		1.57253	17	504.998	494.749	0.96351		1.57052	17	634.524	623.746	1.00685		1.57176	17	523.849	510.043	0.992466		1.57109	17	566.84	554.205	1.01354		1.57153	17	342.208	329.624	0.997917		1.57052	17	413.39	398.857	0.990203		1.57176	17
1.67037	18	1144.68	1133.83	1.0028		1.67037	18	622.202	611.094	1.00375		1.67137	18	525.568	515.319	1.00357		1.67037	18	617.503	606.725	0.979371		1.6725	18	518.791	504.985	0.982624		1.67194	18	567.342	554.707	1.01446		1.67137	18	338.925	326.341	0.987977		1.67237	18	406.616	392.083	0.973386		1.6725	18
1.77022	19	1149.06	1138.21	1.00668		1.77022	19	606.004	594.896	0.977142		1.77122	19	531.909	521.66	1.01592		1.77122	19	615.804	605.026	0.976628		1.77223	19	520.077	506.271	0.985126		1.77279	19	553.922	541.287	0.989919		1.77122	19	338.094	325.51	0.985462		1.77122	19	424.171	409.638	1.01697		1.77223	19
1.87106	20	1142.77	1131.92	1.00112		1.87006	20	622.808	611.7	1.00474		1.87106	20	528.989	518.74	1.01023		1.87106	20	637.02	626.242	1.01087		1.87197	20	526.175	512.369	0.996992		1.87263	20	558.003	545.368	0.997382		1.87106	20	345.038	332.454	1.00648		1.87206	20	428.688	414.155	1.02818		1.87197	20
2.03032	21	760.833	749.983	0.663315		2.02932	21	432.856	421.748	0.692739		2.03032	21	369.229	358.98	0.699103		2.03032	21	433.433	422.655	0.682246		2.035	21	378.715	364.909	0.710057		2.03188	21	391.439	378.804	0.692766		2.03032	21	248.194	235.61	0.713295		2.03132	21	290.935	276.402	0.686196		2.035	21
2.11015	22	813.439	802.589	0.709841		2.10915	22	449.107	437.999	0.719432		2.11015	22	395.195	384.946	0.749671		2.11015	22	476.164	465.386	0.751222		2.11673	22	395.466	381.66	0.742652		2.11172	22	423.828	411.193	0.752		2.11015	22	255.095	242.511	0.734187		2.11115	22	309.863	295.33	0.733187		2.11673	22
2.19999	23	847.094	836.244	0.739607		2.19799	23	467.375	456.267	0.749438		2.19899	23	407.325	397.076	0.773294		2.19999	23	512.527	501.749	0.809919		2.20346	23	422.621	408.815	0.795492		2.20156	23	449.956	437.321	0.799783		2.19899	23	275.539	262.955	0.79608		2.19999	23	340.297	325.764	0.808742		2.20346	23
2.29984	24	876.478	865.628	0.765596		2.29784	24	494.786	483.678	0.794462		2.29884	24	431.24	420.991	0.819868		2.29984	24	519.492	508.714	0.821162		2.30519	24	425.473	411.667	0.801041		2.3014	24	465.484	452.849	0.828181		2.29884	24	286.812	274.228	0.830209		2.29984	24	338.819	324.286	0.805073		2.30519	24
2.39968	25	893.323	882.473	0.780494		2.39768	25	486.181	475.073	0.780328		2.39868	25	431.797	421.548	0.820953		2.39968	25	522.581	511.803	0.826148		2.40493	25	436.897	423.091	0.823271		2.40125	25	463.081	450.446	0.823787		2.39868	25	295.059	282.475	0.855176		2.40068	25	353.053	338.52	0.84041		2.40493	25
2.49953	26	910.695	899.845	0.795858		2.49853	26	521.239	510.131	0.837912		2.49853	26	446.094	435.845	0.848796		2.50053	26	545.222	534.444	0.862695		2.50467	26	435.903	422.097	0.821337		2.5021	26	494.613	481.978	0.881453		2.49953	26	294.14	281.556	0.852394		2.50053	26	345.703	331.17	0.822163		2.50467	26
2.60038	27	916.72	905.87	0.801187		2.59838	27	519.185	508.077	0.834538		2.59938	27	436.382	426.133	0.829882		2.60038	27	536.27	525.492	0.848245		2.6044	27	437.296	423.49	0.824047		2.60194	27	465.086	452.451	0.827453		2.59938	27	295.842	283.258	0.857546		2.60038	27	363.09	348.557	0.865328		2.6054	27
2.70022	28	939.084	928.234	0.820967		2.69822	28	527.239	516.131	0.847767		2.69922	28	457.444	447.195	0.8709		2.69822	28	542.487	531.709	0.85828		2.70514	28	446.499	432.693	0.841955		2.70179	28	483.876	471.241	0.861817		2.69922	28	291.026	278.442	0.842966		2.70022	28	363.674	349.141	0.866778		2.70514	28
2.80007	29	934.903	924.053	0.817269		2.79807	29	518.099	506.991	0.832755		2.79907	29	451.434	441.185	0.859195		2.80007	29	541.935	531.157	0.857389		2.80488	29	455.252	441.446	0.858987		2.80164	29	477.695	465.06	0.850513		2.79907	29	286.314	273.73	0.828701		2.79907	29	363.978	349.445	0.867533		2.80488	29
2.89992	30	958.439	947.589	0.838085		2.89691	30	528.349	517.241	0.849591		2.89891	30	440.104	429.855	0.83713		2.89992	30	559.722	548.944	0.886101		2.90361	30	447.949	434.143	0.844776		2.90148	30	496.403	483.768	0.884727		2.89891	30	281.118	268.534	0.81297		2.89992	30	380.739	366.206	0.909144		2.90461	30
2.99976	31	944.309	933.459	0.825588		2.99876	31	547.76	536.652	0.881474		2.99876	31	453.974	443.725	0.864142		3.00076	31	559.227	548.449	0.885302		3.00535	31	447.884	434.078	0.84465		3.00233	31	500.995	488.36	0.893125		2.99976	31	304.267	291.683	0.883052		3.00076	31	368.118	353.585	0.877811		3.00535	31
3.10061	32	919.895	909.045	0.803995		3.09861	32	530.711	519.603	0.85347		3.09961	32	458.174	447.925	0.872321		3.10061	32	558.901	548.123	0.884776		3.10308	32	460.824	447.018	0.869829		3.10218	32	516.09	503.455	0.920731		3.09961	32	284.443	271.859	0.823037		3.10061	32	377.559	363.026	0.901249		3.10508	32
3.20046	33	955.664	944.814	0.835631		3.19845	33	530.313	519.205	0.852817		3.19945	33	450.059	439.81	0.856517		3.19845	33	563.231	552.453	0.891765		3.20482	33	454.935	441.129	0.85837		3.20202	33	508.025	495.39	0.905981		3.19945	33	294.454	281.87	0.853344		3.20046	33	371.671	357.138	0.886631		3.20482	33
3.2983	34	948.457	937.607	0.829257		3.2983	34	529.599	518.491	0.851644		3.2993	34	460.566	450.317	0.87698		3.3003	34	561.563	550.785	0.889073		3.30556	34	478.184	464.378	0.903609		3.30187	34	507.568	494.933	0.905145		3.2973	34	296.315	283.731	0.858978		3.2993	34	368.37	353.837	0.878436		3.30556	34
3.40015	35	958.695	947.845	0.838311		3.39715	35	540.279	529.171	0.869186		3.39815	35	465.015	454.766	0.885644		3.40015	35	566.246	555.468	0.896632		3.40329	35	467.951	454.145	0.883697		3.40172	35	507.153	494.518	0.904387		3.39915	35	295.959	283.375	0.8579		3.40015	35	375.018	360.485	0.894941		3.40529	35
3.49999	36	962.497	951.647	0.841674		3.49899	36	536.231	525.123	0.862537		3.49899	36	460.768	450.519	0.877373		3.50099	36	558.817	548.039	0.88464		3.50503	36	461.886	448.08	0.871895		3.50056	36	496.205	483.57	0.884365		3.49899	36	305.184	292.6	0.885829		3.49899	36	375.799	361.266	0.89688		3.50503	36
3.60084	37	976.499	965.649	0.854058		3.59684	37	550.74	539.632	0.886369		3.59784	37	457.812	447.563	0.871616		3.59884	37	559.944	549.166	0.886459		3.60376	37	469.951	456.145	0.887589		3.60241	37	514.893	502.258	0.918542		3.59984	37	307.373	294.789	0.892456		3.60084	37	376.375	361.842	0.89831		3.60376	37
3.7055	38	984.224	973.374	0.86089		3.69869	38	532.119	521.011	0.855783		3.69969	38	459.484	449.235	0.874872		3.70069	38	575.809	565.031	0.912069		3.7055	38	467.286	453.48	0.882403		3.70025	38	506.794	494.159	0.90373		3.69969	38	293.225	280.641	0.849623		3.70069	38	372.745	358.212	0.889298		3.7055	38
3.79853	39	959.836	948.986	0.839321		3.79853	39	557.013	545.905	0.896673		3.79953	39	473.248	462.999	0.901677		3.80053	39	578.253	567.475	0.916014		3.80524	39	469.396	455.59	0.886509		3.8021	39	519.6	506.965	0.92715		3.79753	39	307.524	294.94	0.892913		3.79953	39	378.513	363.98	0.903617		3.80424	39
3.89838	40	983.405	972.555	0.860166		3.89738	40	543.14	532.032	0.873886		3.89938	40	469.491	459.242	0.894361		3.89938	40	564.75	553.972	0.894217		3.90397	40	462.435	448.629	0.872964		3.90195	40	514.028	501.393	0.91696		3.89938	40	315.913	303.329	0.91831		3.90038	40	393.555	379.022	0.940961		3.90497	40
3.99923	41	999.469	988.619	0.874374		3.99923	41	545.654	534.546	0.878015		3.99923	41	485.261	475.012	0.925072		4.00123	41	562.74	551.962	0.890973		4.00371	41	467.519	453.713	0.882856		4.00079	41	522.166	509.531	0.931843		3.99822	41	300.382	287.798	0.871291		3.99923	41	389.762	375.229	0.931544		4.00571	41
4.09907	42	974.915	964.065	0.852657		4.09707	42	551.077	539.969	0.886922		4.09807	42	469.76	459.511	0.894885		4.09907	42	558.424	547.646	0.884006		4.10344	42	477.629	463.823	0.902529		4.10264	42	524.709	512.074	0.936493		4.10007	42	310.728	298.144	0.902613		4.10107	42	389.141	374.608	0.930003		4.10344	42
4.19892	43	1003.98	993.133	0.878366		4.19892	43	535.915	524.807	0.862018		4.19992	43	465.069	454.82	0.885749		4.19892	43	566.874	556.096	0.897646		4.20518	43	465.155	451.349	0.878256		4.20249	43	527.224	514.589	0.941093		4.19992	43	307.958	295.374	0.894227		4.19892	43	386.561	372.028	0.923597		4.20518	43
4.29876	44	996.12	985.27	0.871412		4.29876	44	538.764	527.656	0.866698		4.29776	44	464.743	454.494	0.885114		4.30077	44	563.251	552.473	0.891797		4.30392	44	468.098	454.292	0.883983		4.30233	44	525.889	513.254	0.938651		4.29776	44	304.977	292.393	0.885202		4.29976	44	390.171	375.638	0.93256		4.30392	44
4.39861	45	1011.34	1000.49	0.884874		4.39761	45	546.033	534.925	0.878637		4.39961	45	466.917	456.668	0.889348		4.39961	45	574.514	563.736	0.909978		4.40365	45	469.811	456.005	0.887316		4.40118	45	515.544	502.909	0.919732		4.39861	45	298.807	286.223	0.866523		4.40061	45	368.157	353.624	0.877908		4.40565	45
4.49946	46	989.959	979.109	0.865963		4.49746	46	539.733	528.625	0.868289		4.49846	46	469.463	459.214	0.894306		4.49946	46	572.327	561.549	0.906448		4.50439	46	463.295	449.489	0.874637		4.50103	46	510.438	497.803	0.910394		4.49946	46	308.238	295.654	0.895074		4.49946	46	379.666	365.133	0.90648		4.50439	46
4.5993	47	994.896	984.046	0.870329		4.5973	47	542.892	531.784	0.873478		4.5983	47	466.643	456.394	0.888814		4.5993	47	589.214	578.436	0.933707		4.60413	47	475.707	461.901	0.898789		4.60087	47	511.266	498.631	0.911908		4.6003	47	301.314	288.73	0.874112		4.60131	47	389.972	375.439	0.932066		4.60413	47
4.69915	48	991.969	981.119	0.86774		4.69915	48	547.32	536.212	0.880751		4.69815	48	473.954	463.705	0.903052		4.69915	48	570.242	559.464	0.903082		4.70386	48	465.578	451.772	0.87908		4.70072	48	502.665	490.03	0.896179		4.69815	48	302.958	290.374	0.87909		4.69915	48	382.474	367.941	0.913451		4.70586	48
4.799	49	1011.63	1000.78	0.885126		4.798	49	552.785	541.677	0.889728		4.798	49	481.662	471.413	0.918063		4.8	49	565.951	555.173	0.896156		4.8046	49	466.326	452.52	0.880535		4.80156	49	512.523	499.888	0.914207		4.798	49	302.815	290.231	0.878657		4.8	49	373.1	358.567	0.890179		4.8046	49
4.89884	50	991.548	980.698	0.867368		4.89784	50	536.587	525.479	0.863122		4.89984	50	481.136	470.887	0.917039		4.89984	50	585.179	574.401	0.927193		4.90433	50	480.635	466.829	0.908378		4.90141	50	510.14	497.505	0.909849		4.89884	50	296.733	284.149	0.860244		4.89984	50	387.654	373.121	0.926311		4.90634	50
4.99969	51	1008.46	997.609	0.882325		4.99769	51	552.349	541.241	0.889012		4.99869	51	477.296	467.047	0.909561		4.99969	51	557.101	546.323	0.88187		5.00407	51	485.176	471.37	0.917214		5.00126	51	515.433	502.798	0.919529		4.99869	51	292.035	279.451	0.846021		4.99969	51	390.12	375.587	0.932433		5.00407	51
5.09954	52	987.501	976.651	0.863789		5.09753	52	557.568	546.46	0.897584		5.09854	52	471.425	461.176	0.898127		5.09954	52	579.093	568.315	0.91737		5.10381	52	492.699	478.893	0.931853		5.10311	52	525.239	512.604	0.937463		5.10054	52	299.782	287.198	0.869474		5.10154	52	397.43	382.897	0.950581		5.10481	52
5.19938	53	1018.43	1007.58	0.891142		5.19938	53	557.795	546.687	0.897957		5.20038	53	481.883	471.634	0.918494		5.19938	53	573.266	562.488	0.907964		5.20454	53	477.294	463.488	0.901877		5.20095	53	520.043	507.408	0.92796		5.19838	53	307.286	294.702	0.892192		5.19938	53	381.906	367.373	0.912041		5.20454	53
5.29923	54	1017.37	1006.52	0.890206		5.29823	54	555.559	544.451	0.894284		5.29823	54	484.033	473.784	0.922681		5.30023	54	581.166	570.388	0.920716		5.30428	54	493.321	479.515	0.933063		5.3008	54	508.199	495.564	0.906299		5.29823	54	308.456	295.872	0.895734		5.30023	54	379.543	365.01	0.906175		5.30428	54
5.39907	55	990.126	979.276	0.86611		5.39807	55	556.06	544.952	0.895107		5.39907	55	463.255	453.006	0.882216		5.40008	55	565.312	554.534	0.895124		5.40401	55	481.544	467.738	0.910147		5.40164	55	502.948	490.313	0.896696		5.39907	55	307.407	294.823	0.892559		5.40008	55	385.902	371.369	0.921961		5.40401	55
5.49992	56	1034.64	1023.79	0.905482		5.49792	56	558.183	547.075	0.898594		5.49892	56	470.626	460.377	0.896571		5.50192	56	584.182	573.404	0.925584		5.50475	56	485.978	472.172	0.918775		5.50149	56	505.452	492.817	0.901276		5.49892	56	316.807	304.223	0.921017		5.49992	56	372.255	357.722	0.888081		5.50475	56
5.59977	57	1027.62	1016.77	0.899276		5.59777	57	534.849	523.741	0.860267		5.59877	57	477.033	466.784	0.909049		5.59977	57	581.882	571.104	0.921871		5.60449	57	474.398	460.592	0.896242		5.60134	57	516.83	504.195	0.922084		5.59877	57	304.081	291.497	0.882489		5.59977	57	391.291	376.758	0.93534		5.60449	57
5.69961	58	1011.03	1000.18	0.8846		5.69761	58	548.18	537.072	0.882164		5.69861	58	463.195	452.946	0.882099		5.69961	58	591.647	580.869	0.937634		5.70422	58	484.436	470.63	0.915774		5.70118	58	504.406	491.771	0.899363		5.69861	58	303.129	290.545	0.879607		5.69961	58	383.869	369.336	0.916914		5.70422	58
5.79946	59	1025.5	1014.65	0.897394		5.79846	59	555.246	544.138	0.89377		5.79846	59	475.474	465.225	0.906012		5.80046	59	552.504	541.726	0.87445		5.80496	59	476.199	462.393	0.899746		5.80103	59	507.489	494.854	0.905001		5.79846	59	307.794	295.21	0.89373		5.80046	59	385.306	370.773	0.920482		5.80496	59
5.89931	60	1008.15	997.305	0.882056		5.89831	60	546.235	535.127	0.878969		5.89931	60	462.632	452.383	0.881003		5.90031	60	567.534	556.756	0.898711		5.9047	60	475.14	461.334	0.897686		5.90188	60	506.655	494.02	0.903476		5.89931	60	308.52	295.936	0.895928		5.90031	60	388.194	373.661	0.927652		5.9047	60
6.00015	61	1028.75	1017.9	0.900269		5.99815	61	552.849	541.741	0.889833		5.99915	61	474.738	464.489	0.904579		6.00015	61	549.055	538.277	0.868882		6.00443	61	478.765	464.959	0.904739		6.00172	61	511.409	498.774	0.91217		5.99915	61	310.443	297.859	0.90175		6.00015	61	374.176	359.643	0.89285		6.00443	61
6.1	62	1035.01	1024.16	0.905809		6.098	62	574.84	563.732	0.925954		6.099	62	474.954	464.705	0.905		6.1	62	573.47	562.692	0.908293		6.10517	62	490.3	476.494	0.927185		6.10157	62	513.967	501.332	0.916848		6.099	62	310.665	298.081	0.902422		6.1	62	390.163	375.63	0.93254		6.10517	62
6.19985	63	1022.36	1011.51	0.894619		6.19785	63	541.593	530.485	0.871345		6.19885	63	479.992	469.743	0.914811		6.19985	63	567.509	556.731	0.898671		6.2049	63	489.523	475.717	0.925673		6.20141	63	508.397	495.762	0.906662		6.19885	63	300.451	287.867	0.8715		6.19985	63	381.652	367.119	0.91141		6.2049	63
6.29969	64	1021.9	1011.05	0.894209		6.29769	64	547.076	535.968	0.880351		6.29869	64	476.15	465.901	0.907329		6.29969	64	583.236	572.458	0.924057		6.30464	64	501.061	487.255	0.948124		6.30126	64	504.392	491.757	0.899337		6.29869	64	304.909	292.325	0.884996		6.30069	64	380.598	366.065	0.908794		6.30464	64
6.39954	65	1051.81	1040.96	0.92067		6.39854	65	550.627	539.519	0.886183		6.39854	65	464.898	454.649	0.885416		6.40054	65	585.947	575.169	0.928433		6.40338	65	489.682	475.876	0.925982		6.40211	65	518.96	506.325	0.925979		6.39954	65	297.274	284.69	0.861882		6.40054	65	371.774	357.241	0.886887		6.40538	65
6.50039	66	1034.41	1023.56	0.905276		6.49838	66	552.172	541.064	0.888721		6.49939	66	480.122	469.873	0.915064		6.49838	66	585.913	575.135	0.928378		6.50511	66	479.634	465.828	0.90643		6.50195	66	514.649	502.014	0.918095		6.49939	66	295.814	283.23	0.857462		6.50039	66	396.53	381.997	0.948346		6.50511	66
6.60023	67	1039.37	1028.52	0.909667		6.59823	67	546.735	535.627	0.87979		6.59923	67	474.794	464.545	0.904688		6.60023	67	592.193	581.415	0.938515		6.60485	67	497.221	483.415	0.940652		6.6018	67	502.684	490.049	0.896213		6.59923	67	302.181	289.597	0.876737		6.60023	67	396.858	382.325	0.949161		6.60485	67
6.70008	68	1032.88	1022.03	0.903928		6.69808	68	537.417	526.309	0.864485		6.69908	68	480.635	470.386	0.916063		6.70008	68	580.085	569.307	0.918971		6.70459	68	490.835	477.029	0.928226		6.70165	68	528.381	515.746	0.943209		6.69908	68	302.823	290.239	0.878681		6.70008	68	390.643	376.11	0.933731		6.70459	68
6.79892	69	1038.09	1027.24	0.908531		6.79792	69	558.434	547.326	0.899007		6.79892	69	470.852	460.603	0.897011		6.79992	69	580.691	569.913	0.919949		6.80532	69	492.516	478.71	0.931497		6.80149	69	510.307	497.672	0.910155		6.79892	69	300.586	288.002	0.871908		6.79992	69	386.147	371.614	0.92257		6.80532	69
6.89977	70	1013.49	1002.64	0.886774		6.89677	70	559.476	548.368	0.900718		6.89877	70	469.955	459.706	0.895264		6.90077	70	588.509	577.731	0.932569		6.90306	70	493.768	479.962	0.933933		6.90234	70	515.667	503.032	0.919957		6.89977	70	308.04	295.456	0.894475		6.90077	70	396.176	381.643	0.947468		6.90506	70
7.00062	71	1040.53	1029.68	0.91069		6.99862	71	543.332	532.224	0.874201		6.99962	71	481.261	471.012	0.917283		7.00062	71	584.416	573.638	0.925962		7.00479	71	496.324	482.518	0.938907		7.00219	71	509.591	496.956	0.908845		6.99962	71	295.959	283.375	0.8579		7.00062	71	383.87	369.337	0.916917		7.00479	71
7.10046	72	1020.65	1009.8	0.893108		7.09846	72	551.45	540.342	0.887535		7.09946	72	486.583	476.334	0.927647		7.10046	72	581.226	570.448	0.920813		7.10553	72	473.171	459.365	0.893854		7.10203	72	512.279	499.644	0.913761		7.09946	72	308.115	295.531	0.894702		7.10046	72	377.171	362.638	0.900286		7.10353	72
7.20031	73	1046.5	1035.65	0.915966		7.19831	73	543.926	532.818	0.875177		7.19931	73	483.249	473	0.921154		7.19931	73	594.643	583.865	0.94247		7.20527	73	481.725	467.919	0.910499		7.20188	73	516.695	504.06	0.921837		7.19931	73	300.413	287.829	0.871385		7.20031	73	387.931	373.398	0.926999		7.20527	73
7.29916	74	1024.25	1013.4	0.896289		7.29816	74	560.031	548.923	0.90163		7.29916	74	483.462	473.213	0.921569		7.30016	74	592.549	581.771	0.93909		7.305	74	483.252	469.446	0.91347		7.30172	74	516.39	503.755	0.921279		7.29916	74	304.397	291.813	0.883446		7.29916	74	381.673	367.14	0.911462		7.305	74
7.4	75	1032.77	1021.92	0.903827		7.397	75	566.782	555.674	0.912719		7.399	75	481.066	470.817	0.916903		7.401	75	582.768	571.99	0.923302		7.40374	75	474.142	460.336	0.895744		7.40257	75	522.021	509.386	0.931577		7.399	75	319.971	307.387	0.930595		7.401	75	391.984	377.451	0.937061		7.40574	75
7.49885	76	1043.63	1032.78	0.913428		7.49885	76	547.737	536.629	0.881436		7.49985	76	474.526	464.277	0.904166		7.50085	76	585.09	574.312	0.92705		7.50548	76	508.656	494.85	0.962903		7.50042	76	511.255	498.62	0.911888		7.49985	76	312.044	299.46	0.906597		7.50085	76	402.025	387.492	0.961988		7.50548	76
7.6007	77	1008.71	997.859	0.882546		7.59669	77	567.221	556.113	0.91344		7.59769	77	483.071	472.822	0.920807		7.6007	77	588.013	577.235	0.931768		7.60421	77	496.988	483.182	0.940199		7.60226	77	499.378	486.743	0.890167		7.5997	77	322.439	309.855	0.938067		7.6007	77	398.625	384.092	0.953548		7.60421	77
7.69854	78	1016.18	1005.33	0.889153		7.69854	78	551.156	540.048	0.887052		7.69954	78	487.86	477.611	0.930134		7.69954	78	574.979	564.201	0.910729		7.70495	78	477.383	463.577	0.90205		7.70211	78	500.485	487.85	0.892192		7.69954	78	308.695	296.111	0.896458		7.70054	78	369.47	354.937	0.881167		7.70495	78
7.79839	79	1058.18	1047.33	0.926303		7.79739	79	564.332	553.224	0.908694		7.79839	79	465.06	454.811	0.885732		7.79939	79	585.298	574.52	0.927386		7.80568	79	497.448	483.642	0.941094		7.80196	79	518.698	506.063	0.9255		7.79839	79	317.005	304.421	0.921616		7.79939	79	384.208	369.675	0.917756		7.80368	79
7.90024	80	1045.91	1035.06	0.915449		7.89723	80	560.096	548.988	0.901736		7.89923	80	472.586	462.337	0.900388		7.90124	80	580.354	569.576	0.919405		7.90342	80	489.05	475.244	0.924753		7.9028	80	504.862	492.227	0.900197		7.89923	80	301.782	289.198	0.875529		7.90124	80	377.783	363.25	0.901805		7.90542	80
7.99908	81	1047.68	1036.83	0.917016		7.99708	81	563.332	552.224	0.907052		8.00008	81	475.359	465.11	0.905789		8.00108	81	596.807	586.029	0.945963		8.00516	81	484.178	470.372	0.915272		8.00065	81	507.169	494.534	0.904416		8.00008	81	306.129	293.545	0.88869		8.00108	81	389.953	375.42	0.932018		8.00516	81
8.10093	82	1039.79	1028.94	0.910033		8.09893	82	557.147	546.039	0.896893		8.09793	82	489.232	478.983	0.932806		8.09893	82	601.376	590.598	0.953339		8.10389	82	489.759	475.953	0.926132		8.1025	82	525.058	512.423	0.937132		8.09993	82	314.42	301.836	0.91379		8.10093	82	381.542	367.009	0.911137		8.10389	82
8.19877	83	1022.84	1011.99	0.895042		8.19877	83	562.143	551.035	0.905099		8.19977	83	494.456	484.207	0.942979		8.19977	83	595.615	584.837	0.944039		8.20363	83	485.614	471.808	0.918067		8.20234	83	505.837	493.202	0.90198		8.19977	83	317.807	305.223	0.924044		8.19977	83	381.008	366.475	0.909812		8.20563	83
8.29862	84	1034.7	1023.85	0.905531		8.29762	84	545.384	534.276	0.877571		8.29862	84	476.355	466.106	0.907728		8.30062	84	592.312	581.534	0.938708		8.30436	84	477.216	463.41	0.901725		8.30219	84	509.048	496.413	0.907852		8.29862	84	310.109	297.525	0.900739		8.29962	84	389.44	374.907	0.930745		8.30436	84
8.39947	85	1057.08	1046.23	0.925328		8.39747	85	549.388	538.28	0.884148		8.39947	85	488.543	478.294	0.931464		8.39947	85	575.352	564.574	0.911331		8.4041	85	486.432	472.626	0.919658		8.40103	85	509.454	496.819	0.908595		8.39847	85	325.041	312.457	0.945944		8.40147	85	387.138	372.605	0.92503		8.4061	85
8.49931	86	1052.69	1041.84	0.921443		8.49931	86	553.574	542.466	0.891024		8.49831	86	477.224	466.975	0.909421		8.49931	86	588.008	577.23	0.93176		8.50384	86	483.067	469.261	0.913111		8.50088	86	512.777	500.142	0.914672		8.49831	86	309.848	297.264	0.899949		8.49931	86	392.437	377.904	0.938185		8.50584	86
8.59916	87	1047.81	1036.96	0.91713		8.59716	87	561.416	550.308	0.903905		8.59816	87	484.114	473.865	0.922839		8.59916	87	583.059	572.281	0.923771		8.60457	87	491.79	477.984	0.930084		8.60073	87	516.939	504.304	0.922283		8.60016	87	319.79	307.206	0.930047		8.60116	87	391.529	376.996	0.935931		8.60457	87
8.69901	88	1043.79	1032.94	0.913575		8.69801	88	575.147	564.039	0.926458		8.70001	88	488.418	478.169	0.931221		8.70001	88	575.482	564.704	0.911541		8.70431	88	493.677	479.871	0.933756		8.70157	88	517.518	504.883	0.923342		8.69801	88	311.455	298.871	0.904814		8.70001	88	381.131	366.598	0.910117		8.70431	88
8.79885	89	1040.75	1029.9	0.910887		8.79785	89	568.633	557.525	0.915759		8.79885	89	482.022	471.773	0.918765		8.79985	89	605.749	594.971	0.960397		8.80404	89	484.893	471.087	0.916664		8.80242	89	515.761	503.126	0.920129		8.79885	89	307.388	294.804	0.892501		8.79985	89	384.772	370.239	0.919156		8.80404	89
8.9007	90	1050.28	1039.43	0.919314		8.8977	90	565.94	554.832	0.911336		8.8997	90	488.822	478.573	0.932007		8.8997	90	583.99	573.212	0.925274		8.90378	90	489.373	475.567	0.925381		8.90127	90	526.3	513.665	0.939403		8.8997	90	307.307	294.723	0.892256		8.8997	90	382.246	367.713	0.912885		8.90478	90
8.99955	91	1068.06	1057.21	0.935038		8.99754	91	583.339	572.231	0.939914		8.99854	91	486.14	475.891	0.926784		8.99955	91	577.791	567.013	0.915268		9.00452	91	483.084	469.278	0.913144		9.00111	91	517.232	504.597	0.922819		8.99854	91	313.92	301.336	0.912276		8.99955	91	378.334	363.801	0.903173		9.00452	91
9.09939	92	1042.23	1031.38	0.912193		9.09739	92	561.19	550.082	0.903533		9.09839	92	481.758	471.509	0.91825		9.09939	92	589.915	579.137	0.934838		9.10425	92	471.744	457.938	0.891078		9.10096	92	520.646	508.011	0.929063		9.09839	92	314.152	301.568	0.912979		9.09939	92	376.669	362.136	0.89904		9.10425	92
9.19924	93	1042.09	1031.24	0.912071		9.19824	93	570.371	559.263	0.918614		9.19824	93	489.372	479.123	0.933078		9.20024	93	587.741	576.963	0.931329		9.20399	93	482.694	468.888	0.912385		9.20081	93	532.031	519.396	0.949884		9.19824	93	312.753	300.169	0.908743		9.20024	93	389.541	375.008	0.930996		9.20399	93
9.29908	94	1083.94	1073.09	0.949082		9.29808	94	576.203	565.095	0.928193		9.29908	94	483.695	473.446	0.922023		9.30008	94	592.213	581.435	0.938548		9.30473	94	484.565	470.759	0.916025		9.30165	94	528.167	515.532	0.942817		9.29908	94	321.927	309.343	0.936517		9.30008	94	391.297	376.764	0.935355		9.30473	94
9.39993	95	1101.43	1090.58	0.96455		9.39793	95	570.509	559.401	0.91884		9.39893	95	482.195	471.946	0.919101		9.39993	95	596.471	585.693	0.945421		9.40446	95	489.016	475.21	0.924686		9.4015	95	516.891	504.256	0.922196		9.39893	95	309.669	297.085	0.899407		9.39993	95	386.689	372.156	0.923915		9.40646	95
9.49978	96	1075.7	1064.86	0.9418		9.49778	96	569.354	558.246	0.916943		9.49878	96	473.812	463.563	0.902776		9.49978	96	588.631	577.853	0.932766		9.5042	96	475.121	461.315	0.897649		9.50135	96	506.468	493.833	0.903134		9.49878	96	307.206	294.622	0.89195		9.49978	96	391.656	377.123	0.936246		9.5042	96
9.59962	97	1056.37	1045.52	0.924696		9.59762	97	575.02	563.912	0.92625		9.59862	97	475.739	465.49	0.906529		9.59962	97	607.564	596.786	0.963327		9.60493	97	483.936	470.13	0.914801		9.60119	97	503.502	490.867	0.897709		9.59862	97	302.445	289.861	0.877536		9.60163	97	406.698	392.165	0.97359		9.60493	97
9.69947	98	1077.57	1066.72	0.943449		9.69847	98	572.971	561.863	0.922884		9.69847	98	485.133	474.884	0.924823		9.70047	98	590.01	579.232	0.934992		9.70467	98	475.253	461.447	0.897906		9.70104	98	506.245	493.61	0.902726		9.69847	98	304.097	291.513	0.882538		9.70047	98	386.321	371.788	0.923002		9.70467	98
9.79932	99	1054.22	1043.37	0.9228		9.79832	99	578.308	567.2	0.93165		9.79932	99	485.313	475.064	0.925174		9.80032	99	589.983	579.205	0.934948		9.80441	99	470.23	456.424	0.888132		9.80188	99	505.057	492.422	0.900553		9.79932	99	322.9	310.316	0.939463		9.80032	99	387.596	373.063	0.926167		9.80441	99
9.90016	100	1053.35	1042.5	0.922025		9.89816	100	585.8	574.692	0.943956		9.89916	100	484.16	473.911	0.922928		9.90016	100	590.48	579.702	0.93575		9.90514	100	480.322	466.516	0.907769		9.90173	100	506.511	493.876	0.903212		9.89916	100	306.385	293.801	0.889465		9.90016	100	384.675	370.142	0.918915		9.90514	100
10	101	1073.19	1062.34	0.939577		9.99801	101	577.714	566.606	0.930675		9.99901	101	477.424	467.175	0.90981		10	101	580.31	569.532	0.919334		10.0049	101	479.753	465.947	0.906662		10.0016	101	508.109	495.474	0.906135		9.99901	101	303.89	291.306	0.881911		10	101	389.325	374.792	0.930459		10.0049	101
10.0999	102	1078.75	1067.9	0.944496		10.0979	102	574.258	563.15	0.924998		10.0989	102	481.183	470.934	0.917131		10.0999	102	607.184	596.406	0.962714		10.1046	102	485.065	471.259	0.916998		10.1014	102	512.345	499.71	0.913882		10.0989	102	309.285	296.701	0.898244		10.0999	102	400.379	385.846	0.957902		10.1046	102
10.1997	103	1082.76	1071.91	0.948041		10.1977	103	570.977	559.869	0.919609		10.1987	103	469.793	459.544	0.894949		10.1997	103	590.093	579.315	0.935126		10.2044	103	489.232	475.426	0.925107		10.2013	103	519.491	506.856	0.926951		10.1987	103	312.179	299.595	0.907006		10.2007	103	390.663	376.13	0.933781		10.2054	103
10.2985	104	1096.83	1085.98	0.960484		10.2985	104	575.148	564.04	0.92646		10.2985	104	470.806	460.557	0.896922		10.3005	104	590.026	579.248	0.935017		10.3051	104	501.683	487.877	0.949334		10.3021	104	508.558	495.923	0.906956		10.2995	104	316.042	303.458	0.918701		10.3005	104	389.8	375.267	0.931639		10.3051	104
10.4004	105	1105.12	1094.28	0.96782		10.3964	105	546.756	535.648	0.879825		10.3994	105	483.215	472.966	0.921088		10.4004	105	605.5	594.722	0.959995		10.4048	105	484.907	471.101	0.916691		10.402	105	493.176	480.541	0.878825		10.3994	105	304.598	292.014	0.884055		10.4004	105	402.366	387.833	0.962835		10.4048	105
10.5002	106	1086.88	1076.03	0.95168		10.4982	106	571.486	560.378	0.920445		10.4992	106	483.305	473.056	0.921263		10.5002	106	607.181	596.403	0.962709		10.5046	106	476.054	462.248	0.899464		10.4998	106	512.988	500.353	0.915058		10.4992	106	320.239	307.655	0.931407		10.5002	106	391.575	377.042	0.936045		10.5046	106
10.6001	107	1071.15	1060.3	0.937769		10.5981	107	565.874	554.766	0.911227		10.5991	107	483.059	472.81	0.920784		10.6001	107	595.201	584.423	0.943371		10.6053	107	496.505	482.699	0.939259		10.6017	107	510.071	497.436	0.909723		10.5991	107	315.891	303.307	0.918243		10.6001	107	388.241	373.708	0.927768		10.6053	107
10.6999	108	1072.8	1061.95	0.93923		10.6979	108	564.744	553.636	0.909371		10.6989	108	490.741	480.492	0.935745		10.6989	108	575.938	565.16	0.912277		10.705	108	498.797	484.991	0.943719		10.7015	108	507.08	494.445	0.904253		10.6989	108	310.474	297.89	0.901844		10.7009	108	389.524	374.991	0.930953		10.705	108
10.7998	109	1070.88	1060.03	0.937534		10.7988	109	562.608	551.5	0.905863		10.7988	109	489.317	479.068	0.932971		10.8008	109	589.849	579.071	0.934732		10.8048	109	485.032	471.226	0.916934		10.8023	109	504.47	491.835	0.89948		10.7998	109	310.051	297.467	0.900563		10.7988	109	392.129	377.596	0.937421		10.8048	109
10.9006	110	1076.08	1065.23	0.942128		10.8966	110	569.218	558.11	0.91672		10.8996	110	494.669	484.42	0.943394		10.9006	110	593.649	582.871	0.940866		10.9055	110	485.416	471.61	0.917681		10.9022	110	513.669	501.034	0.916303		10.8996	110	315.604	303.02	0.917375		10.9006	110	391.995	377.462	0.937088		10.9055	110
10.9985	111	1074.56	1063.71	0.940783		10.9985	111	579.816	568.708	0.934127		10.9995	111	484.714	474.465	0.924007		11.0005	111	583.291	572.513	0.924146		11.0052	111	486.044	472.238	0.918903		11	111	509.536	496.901	0.908745		10.9995	111	303.702	291.118	0.881342		11.0005	111	401.15	386.617	0.959816		11.0052	111
11.1003	112	1066.42	1055.57	0.933589		11.0973	112	572.857	561.749	0.922697		11.0993	112	481.657	471.408	0.918054		11.1003	112	572.947	562.169	0.907449		11.104	112	482.936	469.13	0.912856		11.1019	112	517.53	504.895	0.923364		11.0993	112	303.925	291.341	0.882017		11.1003	112	401.242	386.709	0.960045		11.104	112
11.2002	113	1065.86	1055.01	0.933088		11.1982	113	579.17	568.062	0.933066		11.1992	113	471.147	460.898	0.897586		11.1992	113	591.634	580.856	0.937613		11.2057	113	489.246	475.44	0.925134		11.2017	113	524.993	512.358	0.937013		11.1992	113	315.831	303.247	0.918062		11.2002	113	386.629	372.096	0.923766		11.2057	113
11.299	114	1070.47	1059.62	0.93717		11.299	114	582.599	571.491	0.938699		11.299	114	472.898	462.649	0.900996		11.301	114	563.175	552.397	0.891675		11.3034	114	484.561	470.755	0.916018		11.3026	114	522.952	510.317	0.93328		11.298	114	303.516	290.932	0.880779		11.299	114	384.231	369.698	0.917813		11.3054	114
11.4009	115	1079.05	1068.2	0.944755		11.3969	115	579.07	567.962	0.932902		11.3999	115	480.145	469.896	0.915109		11.4009	115	594.688	583.91	0.942543		11.4042	115	495.92	482.114	0.93812		11.4024	115	509.625	496.99	0.908907		11.3999	115	304.023	291.439	0.882314		11.4009	115	403.869	389.336	0.966566		11.4052	115
11.4987	116	1074.91	1064.06	0.9411		11.4987	116	577.683	566.575	0.930624		11.4997	116	478.405	468.156	0.911721		11.5007	116	594.358	583.58	0.94201		11.5049	116	498.326	484.52	0.942802		11.5023	116	519.215	506.58	0.926446		11.4997	116	308.239	295.655	0.895077		11.4987	116	400.787	386.254	0.958915		11.5049	116
11.6006	117	1083.95	1073.1	0.949095		11.5976	117	577.621	566.513	0.930522		11.5976	117	489.636	479.387	0.933593		11.5996	117	593.129	582.351	0.940026		11.6037	117	479.089	465.283	0.90537		11.6021	117	538.474	525.839	0.961667		11.5996	117	309.176	296.592	0.897914		11.6006	117	395.249	380.716	0.945166		11.6037	117
11.7004	118	1063.57	1052.72	0.931071		11.6984	118	575.475	564.367	0.926997		11.6994	118	483.898	473.649	0.922418		11.6994	118	596.204	585.426	0.94499		11.7054	118	479.707	465.901	0.906572		11.702	118	521.131	508.496	0.92995		11.6994	118	317.122	304.538	0.92197		11.6994	118	393.726	379.193	0.941385		11.7054	118
11.7992	119	1089.35	1078.5	0.953868		11.7992	119	574.664	563.556	0.925665		11.7982	119	474.99	464.741	0.90507		11.7992	119	584.625	573.847	0.926299		11.8041	119	480.175	466.369	0.907483		11.8028	119	515.536	502.901	0.919718		11.7982	119	302.456	289.872	0.87757		11.8012	119	400.893	386.36	0.959178		11.8051	119
11.9011	120	1078.05	1067.2	0.943876		11.8971	120	587.479	576.371	0.946714		11.9001	120	474.011	463.762	0.903163		11.8991	120	589.398	578.62	0.934004		11.9039	120	496.554	482.748	0.939354		11.9027	120	515.506	502.871	0.919663		11.9001	120	317.539	304.955	0.923233		11.9011	120	398.786	384.253	0.953947		11.9059	120
11.9989	121	1090.83	1079.98	0.955175		11.9969	121	595.014	583.906	0.959091		11.9979	121	473.072	462.823	0.901335		12.0009	121	596.594	585.816	0.945619		12.0036	121	493.47	479.664	0.933353		12.0005	121	512.611	499.976	0.914368		11.9979	121	310.065	297.481	0.900606		11.9989	121	396.29	381.757	0.947751		12.0036	121
12.1008	122	1094.23	1083.38	0.95818		12.0978	122	572.553	561.445	0.922198		12.0998	122	477.264	467.015	0.909498		12.0998	122	594.112	583.334	0.941613		12.1043	122	484.924	471.118	0.916724		12.1024	122	504.189	491.554	0.898966		12.0998	122	313.892	301.308	0.912192		12.1008	122	386.81	372.277	0.924216		12.1043	122
12.1986	123	1101.22	1090.38	0.964371		12.1986	123	585.72	574.612	0.943825		12.1996	123	479.556	469.307	0.913962		12.1996	123	586.561	575.783	0.929424		12.2041	123	491.218	477.412	0.928971		12.2012	123	520.652	508.017	0.929074		12.1986	123	313.108	300.524	0.909818		12.2006	123	397.736	383.203	0.951341		12.2061	123
12.2995	124	1077.39	1066.54	0.94329		12.2975	124	587.943	576.835	0.947476		12.2985	124	481.198	470.949	0.91716		12.2995	124	587.479	576.701	0.930906		12.3038	124	480.917	467.111	0.908927		12.303	124	524.4	511.765	0.935928		12.2985	124	311.988	299.404	0.906427		12.2995	124	391.574	377.041	0.936043		12.3038	124
12.3993	125	1098.59	1087.74	0.962036		12.3973	125	588.038	576.93	0.947632		12.4003	125	478.241	467.992	0.911401		12.3993	125	574.921	564.143	0.910635		12.4045	125	480.816	467.01	0.90873		12.4009	125	525.281	512.646	0.937539		12.3983	125	322.115	309.531	0.937086		12.3993	125	397.905	383.372	0.95176		12.4055	125
12.4992	126	1096.51	1085.66	0.960198		12.4972	126	579.186	568.078	0.933093		12.5002	126	479.206	468.957	0.91328		12.5012	126	594.892	584.114	0.942872		12.5053	126	478.168	464.362	0.903578		12.5007	126	519.495	506.86	0.926958		12.4982	126	321.728	309.144	0.935915		12.4992	126	394.392	379.859	0.943039		12.5043	126
12.601	127	1099.04	1088.19	0.962441		12.598	127	566.643	555.535	0.91249		12.598	127	475.081	464.832	0.905247		12.6	127	579.667	568.889	0.918296		12.604	127	495.669	481.863	0.937632		12.6026	127	519.299	506.664	0.926599		12.6	127	318.754	306.17	0.926911		12.601	127	410.238	395.705	0.982378		12.604	127
12.6989	128	1088.01	1077.16	0.952685		12.6979	128	582.936	571.828	0.939252		12.6999	128	484.959	474.71	0.924484		12.6999	128	578.049	567.271	0.915684		12.7038	128	489.863	476.057	0.926334		12.7014	128	543.586	530.951	0.971016		12.6999	128	310.308	297.724	0.901341		12.6999	128	400.705	386.172	0.958711		12.7048	128
12.7997	129	1088.62	1077.78	0.953227		12.7977	129	566.085	554.977	0.911574		12.7987	129	479.852	469.603	0.914539		12.7997	129	587.31	576.532	0.930633		12.8045	129	485.577	471.771	0.917995		12.8033	129	518.227	505.592	0.924639		12.7987	129	313.652	301.068	0.911465		12.7997	129	402.826	388.293	0.963977		12.8045	129
12.8996	130	1073.18	1062.33	0.939566		12.8976	130	560.875	549.767	0.903016		12.8986	130	492.235	481.986	0.938654		12.8996	130	585.743	574.965	0.928104		12.9042	130	481.467	467.661	0.909997		12.9011	130	523.339	510.704	0.933988		12.8986	130	301.455	288.871	0.874539		12.9016	130	406.51	391.977	0.973123		12.9062	130
12.9994	131	1097.91	1087.06	0.961441		12.9974	131	574.969	563.861	0.926166		12.9984	131	489.781	479.532	0.933875		12.9994	131	602.667	591.889	0.955422		13.004	131	477.04	463.234	0.901383		13.001	131	513.528	500.893	0.916045		12.9984	131	306.917	294.333	0.891075		12.9994	131	398.057	383.524	0.952137		13.004	131
13.0992	132	1077.35	1066.5	0.943258		13.0982	132	573.664	562.556	0.924023		13.0982	132	498.401	488.152	0.950662		13.1002	132	588.309	577.531	0.932246		13.1047	132	486.118	472.312	0.919047		13.1008	132	510.41	497.775	0.910343		13.0982	132	313.249	300.665	0.910245		13.1002	132	387.195	372.662	0.925171		13.1047	132
13.1991	133	1083.31	1072.46	0.948529		13.1991	133	578.817	567.709	0.932487		13.1991	133	507.328	497.079	0.968047		13.2001	133	589.369	578.591	0.933957		13.2044	133	481.152	467.346	0.909384		13.2017	133	518.847	506.212	0.925773		13.1991	133	312.119	299.535	0.906824		13.2001	133	391.915	377.382	0.936889		13.2044	133
13.2999	134	1107.7	1096.85	0.970099		13.2979	134	563.696	552.588	0.90765		13.2989	134	507.719	497.47	0.968809		13.2999	134	572.363	561.585	0.906506		13.3042	134	482.195	468.389	0.911414		13.3015	134	518.56	505.925	0.925248		13.2989	134	313.197	300.613	0.910087		13.2999	134	403.768	389.235	0.966316		13.3042	134
13.3998	135	1076.34	1065.49	0.942358		13.3978	135	560.67	549.562	0.902679		13.3988	135	501.915	491.666	0.957506		13.3998	135	593.618	582.84	0.940816		13.4049	135	494.073	480.267	0.934527		13.4014	135	526.991	514.356	0.940667		13.3988	135	316.978	304.394	0.921534		13.3998	135	400.731	386.198	0.958776		13.4059	135
13.4996	136	1107.8	1096.95	0.970183		13.4976	136	569.364	558.256	0.91696		13.4986	136	496.394	486.145	0.946754		13.4996	136	587.993	577.215	0.931736		13.5046	136	501.886	488.08	0.949729		13.5012	136	524.638	512.003	0.936364		13.4986	136	316.069	303.485	0.918782		13.4996	136	391.242	376.709	0.935218		13.5046	136
13.5995	137	1093.91	1083.06	0.957904		13.5985	137	572.587	561.479	0.922254		13.5985	137	488.365	478.116	0.931117		13.6005	137	597.107	586.329	0.946448		13.6044	137	483.004	469.198	0.912988		13.601	137	509.196	496.561	0.908123		13.6005	137	321.406	308.822	0.93494		13.6005	137	398.21	383.677	0.952517		13.6044	137
13.6993	138	1097.57	1086.72	0.961136		13.6983	138	561.237	550.129	0.903611		13.6993	138	483.874	473.625	0.922371		13.7003	138	594.432	583.654	0.94213		13.7051	138	483.992	470.186	0.91491		13.7019	138	520.706	508.071	0.929173		13.6993	138	308.528	295.944	0.895952		13.7003	138	396.039	381.506	0.947128		13.7051	138
13.8002	139	1086.67	1075.82	0.951495		13.7982	139	575.419	564.311	0.926905		13.7992	139	499.646	489.397	0.953087		13.8002	139	596.742	585.964	0.945858		13.8049	139	493.806	480	0.934007		13.8017	139	512.171	499.536	0.913564		13.7992	139	316.276	303.692	0.919409		13.8002	139	386.885	372.352	0.924402		13.8049	139
13.9	140	1104.1	1093.25	0.966915		13.898	140	573.262	562.154	0.923362		13.901	140	478.47	468.221	0.911847		13.9	140	564.454	553.676	0.893739		13.9046	140	501.107	487.301	0.948214		13.9016	140	513.794	501.159	0.916532		13.899	140	317.368	304.784	0.922715		13.9	140	397.88	383.347	0.951698		13.9046	140
13.9999	141	1089.71	1078.86	0.954189		13.9979	141	571.67	560.562	0.920747		13.9989	141	479.34	469.091	0.913541		13.9999	141	592.585	581.807	0.939148		14.0043	141	494.318	480.512	0.935003		14.0014	141	511.822	499.187	0.912925		13.9989	141	327.082	314.498	0.952123		13.9999	141	397.046	382.513	0.949628		14.0053	141
14.0997	142	1082.68	1071.83	0.94797		14.0977	142	566.066	554.958	0.911542		14.0987	142	478.608	468.359	0.912116		14.0997	142	579.989	569.211	0.918816		14.1051	142	484.711	470.905	0.916309		14.1013	142	515.261	502.626	0.919215		14.0987	142	320.002	307.418	0.930689		14.1007	142	406.605	392.072	0.973359		14.1051	142
14.1996	143	1075.19	1064.35	0.941349		14.1986	143	575.863	564.755	0.927634		14.1986	143	479.462	469.213	0.913779		14.1986	143	571.086	560.308	0.904445		14.2048	143	493.372	479.566	0.933162		14.2021	143	507.199	494.564	0.904471		14.1996	143	319.03	306.446	0.927747		14.2006	143	403.489	388.956	0.965623		14.2048	143
14.2984	144	1094.12	1083.27	0.958085		14.2984	144	579.289	568.181	0.933262		14.2994	144	495.059	484.81	0.944154		14.3004	144	586.545	575.767	0.929398		14.3045	144	491.815	478.009	0.930133		14.302	144	512.129	499.494	0.913487		14.2994	144	312.591	300.007	0.908253		14.3004	144	403.873	389.34	0.966576		14.3045	144
14.4003	145	1077.63	1066.78	0.943501		14.3983	145	552.406	541.298	0.889105		14.3993	145	501.961	491.712	0.957595		14.4003	145	586.803	576.025	0.929815		14.4033	145	490.747	476.941	0.928055		14.4018	145	512.448	499.813	0.91407		14.3993	145	317.883	305.299	0.924274		14.4003	145	393.759	379.226	0.941467		14.4053	145
14.4981	146	1088.73	1077.88	0.953319		14.4981	146	568.859	557.751	0.91613		14.4991	146	481.968	471.719	0.918659		14.4991	146	580.667	569.889	0.91991		14.505	146	499.064	485.258	0.944238		14.5017	146	513.633	500.998	0.916237		14.4991	146	304.569	291.985	0.883967		14.5001	146	393.231	378.698	0.940156		14.505	146
14.5999	147	1085.83	1074.98	0.950756		14.5979	147	567.544	556.436	0.91397		14.5989	147	495.497	485.248	0.945007		14.5999	147	590.861	580.083	0.936365		14.6047	147	496.9	483.094	0.940027		14.6015	147	529.306	516.671	0.9449		14.5989	147	314.678	302.094	0.914571		14.6009	147	383.779	369.246	0.916691		14.6037	147
14.6998	148	1090.26	1079.41	0.954671		14.6988	148	567.169	556.061	0.913354		14.6988	148	480.061	469.812	0.914946		14.6988	148	582.585	571.807	0.923006		14.7055	148	496.865	483.059	0.939959		14.7024	148	525.655	513.02	0.938223		14.6998	148	311.204	298.62	0.904054		14.7008	148	387.981	373.448	0.927123		14.7055	148
14.7986	149	1098.34	1087.49	0.961815		14.7986	149	568.246	557.138	0.915123		14.7996	149	492.125	481.876	0.93844		14.8006	149	587.685	576.907	0.931239		14.8052	149	491.74	477.934	0.929987		14.8022	149	508	495.365	0.905936		14.7976	149	307.156	294.572	0.891799		14.8006	149	384.616	370.083	0.918769		14.8052	149
14.9005	150	1078.36	1067.51	0.944145		14.8965	150	566.471	555.363	0.912208		14.8995	150	488.291	478.042	0.930973		14.9005	150	594.2	583.422	0.941755		14.905	150	486.623	472.817	0.92003		14.9021	150	522.153	509.518	0.931819		14.8995	150	323.94	311.356	0.942611		14.9005	150	392.298	377.765	0.93784		14.905	150
14.9983	151	1094.97	1084.12	0.958841		14.9983	151	576.326	565.218	0.928395		14.9993	151	486.413	476.164	0.927316		15.0003	151	590.299	579.521	0.935458		15.0057	151	495.354	481.548	0.937019		15.0019	151	514.782	502.147	0.918339		14.9993	151	311.332	298.748	0.904441		15.0003	151	402.152	387.619	0.962304		15.0057	151
15.1002	152	1096.99	1086.14	0.960624		15.0972	152	575.622	564.514	0.927239		15.0982	152	490.866	480.617	0.935988		15.0992	152	576.305	565.527	0.912869		15.1034	152	487.802	473.996	0.922324		15.1017	152	523.908	511.273	0.935028		15.0992	152	321.036	308.452	0.93382		15.1002	152	409.017	394.484	0.979347		15.1034	152
15.2	153	1100.78	1089.93	0.963979		15.199	153	567.524	556.416	0.913937		15.199	153	491.016	480.767	0.93628		15.199	153	586.007	575.229	0.92853		15.2052	153	493.818	480.012	0.93403		15.2026	153	508.378	495.743	0.906627		15.199	153	308.241	295.657	0.895083		15.201	153	395.675	381.142	0.946224		15.2052	153
15.2989	154	1118.81	1107.96	0.979924		15.2969	154	574.206	563.098	0.924913		15.2999	154	486.898	476.649	0.92826		15.3009	154	586.135	575.357	0.928737		15.3049	154	477.813	464.007	0.902887		15.3024	154	504.099	491.464	0.898801		15.2999	154	318.46	305.876	0.926021		15.2989	154	388.899	374.366	0.929402		15.3049	154
15.4007	155	1088.53	1077.68	0.953139		15.3967	155	558.476	547.368	0.899076		15.3997	155	484.745	474.496	0.924067		15.4007	155	585.564	574.786	0.927815		15.4036	155	502.543	488.737	0.951008		15.4023	155	506.932	494.297	0.903982		15.3997	155	301.595	289.011	0.874963		15.4007	155	396.184	381.651	0.947488		15.4056	155
15.4986	156	1111.18	1100.33	0.973177		15.4986	156	565.794	554.686	0.911096		15.4996	156	479.693	469.444	0.914229		15.5006	156	592.129	581.351	0.938412		15.5054	156	504.863	491.057	0.955522		15.5011	156	528.935	516.3	0.944222		15.4976	156	311.806	299.222	0.905876		15.4996	156	401.095	386.562	0.95968		15.5054	156
15.6004	157	1086.94	1076.09	0.951736		15.5974	157	563.232	552.124	0.906888		15.5994	157	486.38	476.131	0.927252		15.6004	157	595.907	585.129	0.944511		15.6041	157	492.171	478.365	0.930825		15.602	157	507.373	494.738	0.904789		15.5994	157	308.412	295.828	0.895601		15.6004	157	391.987	377.454	0.937068		15.6041	157
15.6993	158	1097.25	1086.4	0.960854		15.6993	158	574.12	563.012	0.924772		15.6993	158	483.756	473.507	0.922141		15.6993	158	585.424	574.646	0.927589		15.7058	158	493.188	479.382	0.932804		15.7008	158	513.686	501.051	0.916334		15.6993	158	317.029	304.445	0.921689		15.6993	158	381.109	366.576	0.910062		15.7058	158
15.7991	159	1084.56	1073.71	0.949635		15.7991	159	583.27	572.162	0.939801		15.7981	159	484.324	474.075	0.923248		15.8011	159	603.083	592.305	0.956094		15.8036	159	497.889	484.083	0.941952		15.8027	159	508.912	496.277	0.907603		15.7981	159	308.095	295.511	0.894641		15.7991	159	403.065	388.532	0.96457		15.8056	159
15.8989	160	1104.59	1093.74	0.967342		15.8969	160	561.658	550.55	0.904302		15.8999	160	489.969	479.72	0.934241		15.8989	160	588.907	578.129	0.933211		15.9043	160	491.59	477.784	0.929695		15.9005	160	521.401	508.766	0.930444		15.8999	160	318.44	305.856	0.92596		15.9009	160	401.867	387.334	0.961596		15.9053	160
15.9988	161	1086.73	1075.88	0.951549		15.9978	161	575.537	564.429	0.927099		15.9978	161	481.235	470.986	0.917232		15.9998	161	596.359	585.581	0.94524		16.006	161	515.571	501.765	0.976358		16.0014	161	500.682	488.047	0.892552		15.9978	161	310.907	298.323	0.903155		15.9998	161	404.978	390.445	0.96932		16.006	161
16.0986	162	1137.49	1126.64	0.996441		16.0976	162	568.752	557.644	0.915954		16.0986	162	476.43	466.181	0.907874		16.1006	162	593.23	582.452	0.940189		16.1038	162	503.421	489.615	0.952716		16.1022	162	504.101	491.466	0.898805		16.0996	162	319.771	307.187	0.92999		16.1006	162	400.129	385.596	0.957281		16.1038	162
16.1995	163	1120.62	1109.77	0.981527		16.1995	163	583.553	572.445	0.940266		16.1985	163	470.02	459.771	0.895391		16.1995	163	593.321	582.543	0.940336		16.2045	163	493.895	480.089	0.93418		16.2011	163	507.546	494.911	0.905105		16.1985	163	310.349	297.765	0.901465		16.1995	163	403.078	388.545	0.964603		16.2045	163
16.2993	164	1108.66	1097.81	0.970944		16.2973	164	570.542	559.434	0.918895		16.2983	164	477.75	467.501	0.910445		16.2993	164	589.592	578.814	0.934317		16.3043	164	477.12	463.314	0.901539		16.3029	164	529.682	517.047	0.945588		16.2983	164	308.267	295.683	0.895162		16.2993	164	398.286	383.753	0.952706		16.3043	164
16.3992	165	1103.88	1093.03	0.966721		16.3972	165	582.556	571.448	0.938628		16.4002	165	474.401	464.152	0.903923		16.3992	165	588.295	577.517	0.932223		16.404	165	483.726	469.92	0.914393		16.4007	165	516.73	504.095	0.921901		16.4002	165	306.074	293.49	0.888523		16.3992	165	398.122	383.589	0.952299		16.406	165
16.499	166	1101.31	1090.46	0.964449		16.498	166	575.702	564.594	0.92737		16.498	166	484.442	474.193	0.923477		16.5	166	572.529	561.751	0.906774		16.5037	166	502.649	488.843	0.951214		16.5016	166	525.486	512.851	0.937914		16.498	166	318.692	306.108	0.926723		16.5	166	386.696	372.163	0.923933		16.5047	166
16.5989	167	1108.01	1097.16	0.970374		16.5979	167	574.648	563.54	0.925639		16.5989	167	482.849	472.6	0.920375		16.6009	167	591.082	580.304	0.936722		16.6045	167	493.023	479.217	0.932483		16.6014	167	512.879	500.244	0.914858		16.5989	167	307.491	294.907	0.892813		16.6009	167	401.739	387.206	0.961278		16.6045	167
16.6997	168	1133.89	1123.04	0.993263		16.6997	168	572.834	561.726	0.922659		16.6987	168	476.228	465.979	0.907481		16.6997	168	574.002	563.224	0.909152		16.7062	168	488.327	474.521	0.923346		16.7013	168	498.693	486.058	0.888915		16.6987	168	320.167	307.583	0.931189		16.6997	168	404.953	390.42	0.969257		16.7042	168
16.7996	169	1125.1	1114.25	0.985482		16.7976	169	590.331	579.223	0.951399		16.7986	169	482.748	472.499	0.920178		16.7996	169	593.232	582.454	0.940193		16.8039	169	482.824	469.018	0.912638		16.8011	169	522.803	510.168	0.933008		16.7986	169	317.119	304.535	0.921961		16.7996	169	400.774	386.241	0.958883		16.8039	169
16.8994	170	1119.08	1108.23	0.980162		16.8974	170	574.664	563.556	0.925665		16.9004	170	478.038	467.789	0.911006		16.8994	170	583.123	572.345	0.923875		16.9047	170	488.451	474.645	0.923587		16.901	170	513.837	501.202	0.91661		16.9004	170	311.306	298.722	0.904363		16.9014	170	386.689	372.156	0.923915		16.9047	170
16.9993	171	1117.99	1107.14	0.979196		16.9983	171	570.266	559.158	0.918441		16.9983	171	482.883	472.634	0.920441		17.0003	171	592.035	581.257	0.93826		17.0044	171	478.327	464.521	0.903887		17.0008	171	512.355	499.72	0.9139		16.9983	171	320.244	307.66	0.931422		17.0003	171	386.805	372.272	0.924203		17.0044	171
17.0991	172	1117.48	1106.63	0.978749		17.0981	172	573.14	562.032	0.923162		17.0991	172	481.834	471.585	0.918398		17.1001	172	601.331	590.553	0.953266		17.1041	172	485.191	471.385	0.917243		17.1017	172	504.346	491.711	0.899253		17.0991	172	308.737	296.153	0.896585		17.1011	172	378.802	364.269	0.904335		17.1041	172
17.2	173	1143.67	1132.82	1.00191		17.1979	173	556.871	545.763	0.896439		17.1989	173	480.706	470.457	0.916202		17.2	173	591.503	580.725	0.937402		17.2049	173	470.383	456.577	0.888429		17.2015	173	511.392	498.757	0.912139		17.1989	173	313.134	300.55	0.909897		17.2	173	401.929	387.396	0.96175		17.2049	173
17.2998	174	1147.84	1136.99	1.0056		17.2978	174	572.609	561.501	0.92229		17.2988	174	488.922	478.673	0.932202		17.2998	174	588.231	577.453	0.93212		17.3046	174	481.871	468.065	0.910783		17.3034	174	490.467	477.832	0.873871		17.2988	174	306.694	294.11	0.8904		17.2998	174	398.332	383.799	0.95282		17.3046	174
17.3996	175	1101.8	1090.95	0.964883		17.3976	175	575.445	564.337	0.926948		17.3986	175	487.153	476.904	0.928757		17.3996	175	600.18	589.402	0.951408		17.4044	175	492.827	479.021	0.932102		17.4012	175	516.752	504.117	0.921941		17.3986	175	312.697	300.113	0.908574		17.3996	175	405.759	391.226	0.971258		17.4044	175
17.4995	176	1111.14	1100.29	0.973136		17.4985	176	558.258	547.15	0.898718		17.4985	176	487.559	477.31	0.929548		17.5005	176	607.345	596.567	0.962974		17.5051	176	483.696	469.89	0.914334		17.5011	176	499.869	487.234	0.891065		17.4985	176	316.619	304.035	0.920447		17.5005	176	388.841	374.308	0.929258		17.5051	176
17.5993	177	1112.75	1101.9	0.974566		17.5983	177	551.832	540.724	0.888163		17.5993	177	479.908	469.659	0.914648		17.6003	177	585.67	574.892	0.927986		17.6048	177	492.844	479.038	0.932135		17.6019	177	519.117	506.482	0.926267		17.5993	177	313.48	300.896	0.910944		17.6003	177	401.268	386.735	0.960109		17.6048	177
17.7002	178	1095.55	1084.7	0.959353		17.6982	178	565.246	554.138	0.910196		17.6992	178	488.604	478.355	0.931583		17.7002	178	596.724	585.946	0.945829		17.7046	178	483.418	469.612	0.913793		17.7018	178	524.845	512.21	0.936742		17.6992	178	312.31	299.726	0.907402		17.7002	178	397.283	382.75	0.950216		17.7046	178
17.8	179	1120.53	1109.68	0.981443		17.798	179	579.682	568.574	0.933907		17.799	179	479.166	468.917	0.913203		17.8	179	586.46	575.682	0.929261		17.8043	179	487.264	473.458	0.921277		17.8016	179	513.819	501.184	0.916577		17.799	179	319.246	306.662	0.9284		17.8	179	399.585	385.052	0.955931		17.8053	179
17.8999	180	1111.36	1100.51	0.973334		17.8979	180	566.946	555.838	0.912988		17.8989	180	503.162	492.913	0.959934		17.8999	180	588.187	577.409	0.932049		17.905	180	494.62	480.814	0.935591		17.9014	180	508.103	495.468	0.906124		17.8989	180	325.591	313.007	0.94761		17.8999	180	404.919	390.386	0.969173		17.905	180
17.9997	181	1086.9	1076.05	0.951699		17.9987	181	583.672	572.564	0.940461		17.9987	181	490.099	479.85	0.934494		17.9997	181	582.013	571.235	0.922083		18.0048	181	487.851	474.045	0.922419		18.0013	181	515.359	502.724	0.919394		17.9987	181	310.849	298.265	0.902979		18.0007	181	401.839	387.306	0.961527		18.0048	181
18.0996	182	1090.38	1079.53	0.954779		18.0986	182	573.658	562.55	0.924013		18.0986	182	482.947	472.698	0.920566		18.1006	182	599.137	588.359	0.949724		18.1045	182	490.834	477.028	0.928224		18.1021	182	510.305	497.67	0.910151		18.0996	182	313.164	300.58	0.909988		18.1006	182	397.158	382.625	0.949906		18.1045	182
18.2004	183	1113.01	1102.16	0.974796		18.1984	183	577.519	566.411	0.930355		18.1994	183	481.739	471.49	0.918213		18.1984	183	589.853	579.075	0.934738		18.2052	183	484.038	470.232	0.915		18.202	183	515.701	503.066	0.920019		18.1994	183	319.002	306.418	0.927662		18.2004	183	382.315	367.782	0.913056		18.2052	183
18.3003	184	1103.15	1092.31	0.966078		18.2983	184	579.534	568.426	0.933664		18.2993	184	469.037	458.788	0.893477		18.3003	184	570.882	560.104	0.904115		18.305	184	489.286	475.48	0.925212		18.3018	184	527.11	514.475	0.940884		18.2993	184	311.937	299.353	0.906273		18.3003	184	398.503	383.97	0.953245		18.305	184
18.4001	185	1114.04	1103.19	0.975707		18.3971	185	557.746	546.638	0.897877		18.3991	185	483.927	473.678	0.922474		18.4001	185	569.374	558.596	0.901681		18.4037	185	493.875	480.069	0.934141		18.4017	185	533.502	520.867	0.952574		18.3991	185	322.463	309.879	0.93814		18.4001	185	393.79	379.257	0.941544		18.4047	185
18.5	186	1114.67	1103.82	0.97626		18.498	186	581.097	569.989	0.936232		18.499	186	477.354	467.105	0.909674		18.5	186	586.315	575.537	0.929027		18.5055	186	493.439	479.633	0.933293		18.5005	186	526.099	513.464	0.939035		18.499	186	316.293	303.709	0.91946		18.501	186	392.019	377.486	0.937147		18.5055	186
18.5998	187	1110.5	1099.65	0.972577		18.5988	187	570.467	559.359	0.918771		18.5988	187	482.609	472.36	0.919908		18.6008	187	589.303	578.525	0.93385		18.6052	187	502.764	488.958	0.951438		18.6024	187	529.839	517.204	0.945875		18.5998	187	311.646	299.062	0.905392		18.6008	187	413.612	399.079	0.990754		18.6052	187
18.7006	188	1112.63	1101.78	0.974454		18.6986	188	557.914	546.806	0.898152		18.6996	188	487.624	477.375	0.929674		18.6986	188	587.209	576.431	0.93047		18.7049	188	499.669	485.863	0.945415		18.7022	188	524.953	512.318	0.93694		18.6996	188	301.322	288.738	0.874137		18.7006	188	379.993	365.46	0.907292		18.7049	188
18.7985	189	1105.2	1094.35	0.967884		18.7985	189	583.999	572.891	0.940998		18.7995	189	487.758	477.509	0.929935		18.8005	189	588.007	577.229	0.931758		18.8057	189	494.369	480.563	0.935102		18.8021	189	523.042	510.407	0.933445		18.7995	189	305.678	293.094	0.887324		18.8005	189	415.215	400.682	0.994734		18.8057	189
18.9003	190	1128.64	1117.8	0.988622		18.8973	190	564.756	553.648	0.909391		18.8993	190	467.161	456.912	0.889823		18.9003	190	592.574	581.796	0.93913		18.9034	190	508.666	494.86	0.962922		18.9019	190	513.381	500.746	0.915776		18.8993	190	309.396	296.812	0.89858		18.9003	190	391.463	376.93	0.935767		18.9054	190
18.9992	191	1110.75	1099.9	0.972798		18.9982	191	583.753	572.645	0.940594		18.9992	191	491.392	481.143	0.937012		19.0002	191	594.707	583.929	0.942574		19.0051	191	482.528	468.722	0.912062		19.0018	191	524.585	511.95	0.936267		18.9992	191	313.544	300.96	0.911138		19.0002	191	405.421	390.888	0.970419		19.0051	191
19.1	192	1114.73	1103.88	0.976315		19.097	192	563.67	552.562	0.907607		19.099	192	491.255	481.006	0.936746		19.101	192	607.945	597.167	0.963942		19.1039	192	497.125	483.319	0.940465		19.1026	192	509.779	497.144	0.909189		19.099	192	322.207	309.623	0.937365		19.101	192	391.126	376.593	0.934931		19.1049	192
19.1989	193	1106.05	1095.2	0.968635		19.1989	193	553.986	542.878	0.891701		19.1999	193	474.328	464.079	0.903781		19.1989	193	586.246	575.468	0.928916		19.2056	193	491.048	477.242	0.92864		19.2004	193	514.156	501.521	0.917194		19.1999	193	311.061	298.477	0.903621		19.1989	193	404.354	389.821	0.96777		19.2056	193
19.2987	194	1098.28	1087.43	0.961762		19.2987	194	582.541	571.433	0.938603		19.2997	194	490.455	480.206	0.935188		19.3007	194	588.239	577.461	0.932133		19.3053	194	489.211	475.405	0.925066		19.3023	194	527.141	514.506	0.940941		19.2977	194	305.029	292.445	0.885359		19.2987	194	385.761	371.228	0.921611		19.3033	194
19.4006	195	1109.8	1098.95	0.971958		19.3976	195	570.782	559.674	0.919289		19.3996	195	476.782	466.533	0.90856		19.3996	195	582.956	572.178	0.923605		19.4041	195	487.008	473.202	0.920779		19.4011	195	530.244	517.609	0.946616		19.3996	195	312.928	300.344	0.909273		19.4006	195	406.919	392.386	0.974138		19.4051	195
19.4994	196	1114.03	1103.18	0.975699		19.4984	196	575.166	564.058	0.92649		19.4994	196	487.894	477.645	0.9302		19.5004	196	587.95	577.172	0.931666		19.5038	196	506.308	492.502	0.958334		19.501	196	521.343	508.708	0.930338		19.4984	196	311.907	299.323	0.906182		19.4994	196	382.374	367.841	0.913203		19.5058	196
19.6003	197	1126.77	1115.92	0.986965		19.5973	197	558.481	547.373	0.899084		19.5983	197	492.572	482.323	0.93931		19.5993	197	601.632	590.854	0.953752		19.6035	197	512.514	498.708	0.97041		19.6028	197	519.119	506.484	0.92627		19.5993	197	312.965	300.381	0.909385		19.6013	197	392.815	378.282	0.939124		19.6035	197
19.6991	198	1098.27	1087.42	0.961759		19.6991	198	571.024	559.916	0.919686		19.7001	198	483.187	472.938	0.921033		19.6991	198	584.666	573.888	0.926365		19.7053	198	496.173	482.367	0.938613		19.7007	198	519.138	506.503	0.926305		19.7001	198	309.643	297.059	0.899328		19.7011	198	389.105	374.572	0.929913		19.7053	198
19.799	199	1094.64	1083.79	0.958545		19.797	199	569.825	558.717	0.917717		19.798	199	480.74	470.491	0.916268		19.801	199	603.524	592.746	0.956806		19.804	199	506.981	493.175	0.959644		19.8025	199	518.707	506.072	0.925517		19.8	199	311.197	298.613	0.904033		19.799	199	404.428	389.895	0.967954		19.804	199
19.8988	200	1092.33	1081.48	0.956505		19.8978	200	556.782	545.674	0.896293		19.8998	200	482.359	472.11	0.919421		19.8998	200	589.634	578.856	0.934385		19.9038	200	486.762	472.956	0.9203		19.9014	200	518.651	506.016	0.925414		19.8998	200	319.79	307.206	0.930047		19.9008	200	389.103	374.57	0.929908		19.9058	200
[truncated: 12 more columns]

## Sheet: 2J 24hUV
Cell 00						Cell 01						Cell 02						Cell 03						Cell 04						Cell 05						Cell 06						Cell 07						Cell 08
	paste BG		average pre-bleach				paste BG		average pre-bleach				paste BG		average pre-bleach				paste BG		average pre-bleach				paste BG		average pre-bleach				paste BG		average pre-bleach				paste BG		average pre-bleach				paste BG		average pre-bleach				paste BG
	1	9.8	635.726				1	12.829	349.291				1	13.344	388.547				1	11.387	405.04				1	9.651	481.446				1	11.102	441.633				1	11.96	400.507				1	12.484	243.896				1
	paste FRAP	RAW					paste FRAP	RAW					paste FRAP	RAW					paste FRAP	RAW					paste FRAP	RAW					paste FRAP	RAW					paste FRAP	RAW					paste FRAP	RAW					paste FRAP
Time	data here		minus BG	Normalized		Time	data here		minus BG	Normalized		Time	data here		minus BG	Normalized		Time	data here		minus BG	Normalized		Time	data here		minus BG	Normalized		Time	data here		minus BG	Normalized		Time	data here		minus BG	Normalized		Time	data here		minus BG	Normalized		Time	data here
0	1	703.758	693.958	1.0916		0	1	386.662	373.833	1.07026		0	1	436.497	423.153	1.08907		0	1	449.536	438.149	1.08174		0	1	539.069	529.418	1.09964		0	1	489.919	478.817	1.0842		0	1	443.541	431.581	1.07759		0	1	276.058	263.574	1.08068		0	1
0.0998463	2	682.836	673.036	1.05869		0.0798342	2	377.178	364.349	1.04311		0.0798342	2	414.529	401.185	1.03253		0.0798342	2	443.699	432.312	1.06733		0.0817251	2	508.919	499.268	1.03702		0.0798342	2	487.495	476.393	1.07871		0.0779433	2	426.572	414.612	1.03522		0.0798342	2	273.477	260.993	1.0701		0.0798342	2
0.199693	3	677.501	667.701	1.0503		0.171676	3	380.119	367.29	1.05153		0.171676	3	424.479	411.135	1.05814		0.172676	3	432.215	420.828	1.03898		0.170454	3	504.104	494.453	1.02702		0.171676	3	487.844	476.742	1.0795		0.169895	3	429.832	417.872	1.04336		0.170675	3	263.965	251.481	1.0311		0.171676	3
0.299539	4	659.731	649.931	1.02234		0.271522	4	369.433	356.604	1.02094		0.271522	4	415.313	401.969	1.03455		0.272523	4	443.734	432.347	1.06742		0.271191	4	508.706	499.055	1.03657		0.271522	4	479.246	468.144	1.06003		0.269852	4	416.037	404.077	1.00891		0.271522	4	254.238	241.754	0.991219		0.271522	4
0.399385	5	664.07	654.27	1.02917		0.371368	5	378.527	365.698	1.04697		0.371368	5	418.939	405.595	1.04388		0.372369	5	420.951	409.564	1.01117		0.371928	5	492.534	482.883	1.00298		0.371368	5	466.901	455.799	1.03208		0.371809	5	422.496	410.536	1.02504		0.371368	5	246.75	234.266	0.960517		0.371368	5
0.499232	6	643.963	634.163	0.997541		0.471215	6	373.973	361.144	1.03393		0.471215	6	409.325	395.981	1.01913		0.472215	6	430.279	418.892	1.0342		0.471664	6	505.439	495.788	1.02979		0.471215	6	465.928	454.826	1.02987		0.469765	6	414.673	402.713	1.00551		0.471215	6	247.524	235.04	0.963691		0.471215	6
0.600078	7	651.16	641.36	1.00886		0.572061	7	364.465	351.636	1.00671		0.572061	7	407.281	393.937	1.01387		0.572061	7	432.696	421.309	1.04017		0.5714	7	492.126	482.475	1.00214		0.571061	7	474.203	463.101	1.04861		0.569721	7	412.737	400.777	1.00067		0.571061	7	253.255	240.771	0.987188		0.572061	7
0.699925	8	650.851	641.051	1.00838		0.671908	8	375.251	362.422	1.03759		0.671908	8	409.373	396.029	1.01926		0.671908	8	415.298	403.911	0.997213		0.672136	8	492.783	483.132	1.0035		0.671908	8	459.48	448.378	1.01527		0.670679	8	432.469	420.509	1.04994		0.670907	8	258.348	245.864	1.00807		0.671908	8
0.799771	9	662.392	652.592	1.02653		0.771754	9	368.188	355.359	1.01737		0.771754	9	394.975	381.631	0.982201		0.772755	9	425.427	414.04	1.02222		0.771872	9	489.204	479.553	0.996067		0.771754	9	453.761	442.659	1.00232		0.770635	9	410.589	398.629	0.99531		0.771754	9	258.92	246.436	1.01042		0.771754	9
0.899617	10	663.553	653.753	1.02836		0.8716	10	367.708	354.879	1.016		0.8716	10	390.878	377.534	0.971657		0.872601	10	438.12	426.733	1.05356		0.871608	10	491.492	481.841	1.00082		0.873602	10	464.588	453.486	1.02684		0.870592	10	398.096	386.136	0.964117		0.8716	10	252.524	240.04	0.984191		0.8716	10
0.999464	11	643.531	633.731	0.996862		0.971447	11	351.428	338.599	0.969389		0.971447	11	399.427	386.083	0.993659		0.970446	11	423.416	412.029	1.01726		0.972345	11	498.467	488.816	1.01531		0.971447	11	457.846	446.744	1.01157		0.970548	11	403.153	391.193	0.976744		0.971447	11	251.107	238.623	0.978381		0.971447	11
1.10031	12	641.377	631.577	0.993474		1.07129	12	362.35	349.521	1.00066		1.07229	12	407.415	394.071	1.01422		1.07229	12	420.798	409.411	1.01079		1.07208	12	483.137	473.486	0.983466		1.07129	12	470.955	459.853	1.04126		1.07051	12	413.333	401.373	1.00216		1.07129	12	250.791	238.307	0.977086		1.07229	12
1.20016	13	641.765	631.965	0.994084		1.17214	13	360.898	348.069	0.996501		1.17214	13	402.101	388.757	1.00054		1.17214	13	423.454	412.067	1.01735		1.17182	13	503.645	493.994	1.02606		1.17214	13	445.178	434.076	0.982889		1.17046	13	414.842	402.882	1.00593		1.17114	13	269.367	256.883	1.05325		1.17214	13
1.3	14	626.084	616.284	0.969418		1.27199	14	362.918	350.089	1.00228		1.27199	14	396.596	383.252	0.986373		1.27299	14	422.733	411.346	1.01557		1.27255	14	482.662	473.011	0.982479		1.27199	14	458.694	447.592	1.01349		1.27042	14	420.632	408.672	1.02039		1.27199	14	252.896	240.412	0.985716		1.26998	14
1.39985	15	657.295	647.495	1.01851		1.37183	15	358.515	345.686	0.989679		1.37183	15	406.626	393.282	1.01219		1.37283	15	423.441	412.054	1.01732		1.37229	15	491.196	481.545	1.0002		1.37183	15	448.916	437.814	0.991353		1.37037	15	415.207	403.247	1.00684		1.37183	15	251.309	238.825	0.97921		1.37183	15
1.4997	16	652.38	642.58	1.01078		1.47168	16	381.166	368.337	1.05453		1.47168	16	408.35	395.006	1.01662		1.47068	16	402.688	391.301	0.96608		1.47203	16	479.138	469.487	0.975159		1.47168	16	441.911	430.809	0.975492		1.47033	16	414.239	402.279	1.00442		1.47168	16	261.559	249.075	1.02124		1.47168	16
1.60054	17	644.622	634.822	0.998578		1.57153	17	359.841	347.012	0.993475		1.57253	17	404.761	391.417	1.00739		1.57253	17	409.839	398.452	0.983735		1.57176	17	497.596	487.945	1.0135		1.57153	17	451.492	440.39	0.997186		1.57029	17	415.758	403.798	1.00822		1.57153	17	251.28	238.796	0.979091		1.57253	17
1.70039	18	653.34	643.54	1.01229		1.67237	18	360.677	347.848	0.995868		1.67237	18	399.134	385.79	0.992905		1.67137	18	413.834	402.447	0.993598		1.6725	18	488.116	478.465	0.993807		1.67137	18	466.585	455.483	1.03136		1.67024	18	406.016	394.056	0.983892		1.67137	18	257.397	244.913	1.00417		1.67237	18
1.80024	19	664.243	654.443	1.02944		1.77222	19	363.444	350.615	1.00379		1.77222	19	404.719	391.375	1.00728		1.77322	19	418.354	406.967	1.00476		1.77223	19	490.787	481.136	0.999355		1.77222	19	448.078	436.976	0.989456		1.7702	19	404.635	392.675	0.980444		1.77222	19	257.105	244.621	1.00297		1.77022	19
1.89908	20	630.623	620.823	0.976558		1.87206	20	359.964	347.135	0.993827		1.87206	20	389.777	376.433	0.968823		1.87307	20	405.713	394.326	0.973548		1.87197	20	496.23	486.579	1.01066		1.87206	20	437.691	426.589	0.965936		1.87116	20	416.858	404.898	1.01096		1.87206	20	260.986	248.502	1.01889		1.87206	20
2.05833	21	441.671	431.871	0.679335		2.03132	21	245.609	232.78	0.666436		2.03132	21	277.67	264.326	0.680294		2.03232	21	288.478	277.091	0.684108		2.035	21	339.113	329.462	0.684317		2.03132	21	299.62	288.518	0.653299		2.02663	21	290.988	279.028	0.696686		2.03132	21	175.073	162.589	0.666633		2.03132	21
2.13817	22	472.182	462.382	0.727329		2.11115	22	273.536	260.707	0.746389		2.11115	22	302.694	289.35	0.744698		2.11215	22	330.968	319.581	0.789011		2.11673	22	359.355	349.704	0.726361		2.11115	22	331.101	319.999	0.724582		2.10457	22	301.23	289.27	0.722259		2.11115	22	193.553	181.069	0.742403		2.11115	22
2.22801	23	495.797	485.997	0.764476		2.19999	23	285.412	272.583	0.780389		2.19799	23	317.455	304.111	0.782689		2.19999	23	337.23	325.843	0.804471		2.20346	23	398.406	388.755	0.807473		2.19799	23	335.182	324.08	0.733823		2.19552	23	332.291	320.331	0.799813		2.20099	23	198.905	186.421	0.764347		2.19999	23
2.32785	24	521.413	511.613	0.80477		2.29784	24	292.645	279.816	0.801097		2.29984	24	334.1	320.756	0.825528		2.30184	24	350.111	338.724	0.836273		2.30519	24	400.386	390.735	0.811586		2.29984	24	357.589	346.487	0.784559		2.29548	24	334.247	322.287	0.804697		2.30084	24	205.419	192.935	0.791055		2.29984	24
2.4277	25	522.144	512.344	0.80592		2.39968	25	293.137	280.308	0.802505		2.39968	25	330.02	316.676	0.815027		2.40168	25	359.05	347.663	0.858342		2.40493	25	416.23	406.579	0.844495		2.39968	25	364.761	353.659	0.800799		2.39344	25	350.685	338.725	0.84574		2.40068	25	208.706	196.222	0.804532		2.39968	25
2.52755	26	528.483	518.683	0.815891		2.49853	26	304.332	291.503	0.834556		2.49853	26	337.679	324.335	0.834739		2.50253	26	350.225	338.838	0.836554		2.50467	26	430.194	420.543	0.873499		2.49753	26	375.875	364.773	0.825965		2.49539	26	349.069	337.109	0.841705		2.49953	26	220.57	208.086	0.853176		2.49953	26
2.62839	27	538.462	528.662	0.831588		2.59938	27	300.858	288.029	0.82461		2.60038	27	339.614	326.27	0.839719		2.60238	27	367.058	355.671	0.878113		2.6044	27	432.651	423	0.878602		2.59938	27	374.712	363.61	0.823331		2.59335	27	351.22	339.26	0.847076		2.60138	27	220.332	207.848	0.8522		2.60038	27
2.72824	28	566.316	556.516	0.875402		2.70022	28	310.707	297.878	0.852807		2.70022	28	346.344	333	0.85704		2.70222	28	383.384	371.997	0.91842		2.70514	28	438.468	428.817	0.890685		2.69922	28	382.897	371.795	0.841865		2.69531	28	358.242	346.282	0.864608		2.70122	28	220.096	207.612	0.851233		2.70022	28
2.82608	29	561.879	552.079	0.868423		2.79807	29	311.406	298.577	0.854808		2.80007	29	350.7	337.356	0.868251		2.80207	29	362.277	350.89	0.86631		2.80488	29	436.967	427.316	0.887567		2.80007	29	381.607	370.505	0.838944		2.79526	29	358.95	346.99	0.866376		2.80107	29	225.776	213.292	0.874521		2.80007	29
2.92793	30	549.926	540.126	0.849621		2.89992	30	314.857	302.028	0.864689		2.89992	30	357.903	344.559	0.886789		2.90092	30	371.855	360.468	0.889957		2.90461	30	435.839	426.188	0.885224		2.89992	30	376.923	365.821	0.828338		2.89422	30	367.349	355.389	0.887347		2.90092	30	227.475	214.991	0.881487		2.89992	30
3.02778	31	563.23	553.43	0.870548		2.99876	31	310.878	298.049	0.853297		2.99876	31	340.982	327.638	0.84324		3.00276	31	381.37	369.983	0.913448		3.00535	31	452.347	442.696	0.919513		2.99976	31	364.072	352.97	0.799239		2.99518	31	357.683	345.723	0.863213		2.99976	31	225.282	212.798	0.872496		2.99976	31
3.12863	32	560.34	550.54	0.866002		3.09961	32	311.002	298.173	0.853652		3.09961	32	356.11	342.766	0.882175		3.10261	32	376.713	365.326	0.90195		3.10508	32	445.149	435.498	0.904562		3.09961	32	380.595	369.493	0.836652		3.09413	32	359.169	347.209	0.866923		3.10161	32	225.689	213.205	0.874165		3.09861	32
3.22847	33	572.614	562.814	0.885309		3.20046	33	320.372	307.543	0.880478		3.19845	33	364.818	351.474	0.904586		3.20246	33	363.579	352.192	0.869524		3.20482	33	448.38	438.729	0.911273		3.19845	33	390.345	379.243	0.85873		3.19509	33	361.517	349.557	0.872786		3.19945	33	222.78	210.296	0.862237		3.20046	33
3.32632	34	566.888	557.088	0.876302		3.2983	34	323.675	310.846	0.889934		3.3003	34	360.35	347.006	0.893087		3.3023	34	379.995	368.608	0.910053		3.30556	34	440.58	430.929	0.895072		3.3003	34	385.652	374.55	0.848103		3.29505	34	357.574	345.614	0.862941		3.3013	34	228.378	215.894	0.88519		3.2983	34
3.42816	35	574.464	564.664	0.888219		3.40015	35	315.636	302.807	0.866919		3.39815	35	362.897	349.553	0.899642		3.40115	35	376.81	365.423	0.90219		3.40529	35	446.698	437.047	0.907779		3.40015	35	383.134	372.032	0.842402		3.394	35	365.219	353.259	0.882029		3.40015	35	231.596	219.112	0.898384		3.40015	35
3.52801	36	562.617	552.817	0.869584		3.49899	36	320.088	307.259	0.879665		3.49899	36	364.107	350.763	0.902757		3.503	36	399.663	388.276	0.958611		3.50403	36	452.755	443.104	0.92036		3.49799	36	403.877	392.775	0.88937		3.49396	36	371.614	359.654	0.897996		3.49999	36	223.832	211.348	0.866551		3.49999	36
3.62886	37	558.904	549.104	0.863743		3.59984	37	319.299	306.47	0.877406		3.59884	37	361.231	347.887	0.895355		3.60284	37	386.473	375.086	0.926047		3.60577	37	454.865	445.214	0.924743		3.59984	37	406.854	395.752	0.896111		3.59392	37	370.909	358.949	0.896236		3.60184	37	224.28	211.796	0.868388		3.59884	37
3.7287	38	573.419	563.619	0.886575		3.70069	38	323.707	310.878	0.890026		3.69869	38	364.548	351.204	0.903892		3.70269	38	390.43	379.043	0.935816		3.7055	38	457.977	448.326	0.931206		3.69869	38	393.297	382.195	0.865414		3.69587	38	358.836	346.876	0.866092		3.69969	38	226.948	214.464	0.879327		3.70069	38
3.82655	39	552.582	542.782	0.853799		3.79853	39	326.958	314.129	0.899333		3.80053	39	360.44	347.096	0.893319		3.80153	39	383.767	372.38	0.919366		3.80524	39	456.19	446.539	0.927495		3.80053	39	405.705	394.603	0.89351		3.79383	39	367.837	355.877	0.888566		3.80153	39	220.356	207.872	0.852299		3.79853	39
3.9274	40	582.941	573.141	0.901553		3.89838	40	321.46	308.631	0.883593		3.89838	40	348.941	335.597	0.863724		3.90138	40	396.215	384.828	0.950099		3.90497	40	444.481	434.83	0.903174		3.89838	40	413.973	402.871	0.912231		3.89379	40	366.618	354.658	0.885522		3.90038	40	232.386	219.902	0.901623		3.90038	40
4.02824	41	581.453	571.653	0.899213		3.99923	41	322.469	309.64	0.886481		3.99923	41	364.197	350.853	0.902988		4.00123	41	389.929	378.542	0.934579		4.00371	41	453.542	443.891	0.921995		3.99822	41	398.45	387.348	0.877082		3.99374	41	373.101	361.141	0.901709		4.00023	41	231.052	218.568	0.896154		3.99923	41
4.12909	42	585.828	576.028	0.906095		4.10007	42	319.726	306.897	0.878628		4.09907	42	363.426	350.082	0.901004		4.10307	42	381.834	370.447	0.914594		4.10545	42	436.579	426.928	0.886761		4.10007	42	397.639	386.537	0.875246		4.0947	42	364.846	352.886	0.881098		4.10007	42	235.965	223.481	0.916297		4.09907	42
4.22694	43	582.063	572.263	0.900172		4.19892	43	320.866	308.037	0.881892		4.19892	43	367.721	354.377	0.912058		4.20292	43	385.868	374.481	0.924553		4.20518	43	458.038	448.387	0.931333		4.19892	43	395.094	383.992	0.869483		4.19566	43	371.033	359.073	0.896545		4.19992	43	240.688	228.204	0.935662		4.19892	43
4.32678	44	591.914	582.114	0.915668		4.29876	44	327.277	314.448	0.900246		4.30077	44	366.522	353.178	0.908972		4.30177	44	375.579	364.192	0.899151		4.30592	44	449.614	439.963	0.913836		4.29876	44	411.599	400.497	0.906856		4.29461	44	378.448	366.488	0.915059		4.30177	44	232.229	219.745	0.900979		4.29876	44
4.42763	45	589	579.2	0.911084		4.39861	45	324.653	311.824	0.892734		4.39861	45	356.893	343.549	0.88419		4.40161	45	374.336	362.949	0.896082		4.40365	45	463.325	453.674	0.942315		4.39861	45	406.96	395.858	0.896351		4.39457	45	372.68	360.72	0.900658		4.40061	45	227.991	215.507	0.883603		4.40061	45
4.52747	46	592.441	582.641	0.916497		4.49946	46	335.018	322.189	0.922408		4.49946	46	363.11	349.766	0.900191		4.50146	46	386.944	375.557	0.92721		4.50439	46	467.441	457.79	0.950864		4.49846	46	411.263	400.161	0.906095		4.49453	46	365.425	353.465	0.882543		4.50046	46	235.643	223.159	0.914977		4.49946	46
4.62932	47	580.161	570.361	0.897181		4.5993	47	331.975	319.146	0.913696		4.5993	47	368.229	354.885	0.913365		4.60131	47	386.077	374.69	0.925069		4.60413	47	465.1	455.449	0.946001		4.5993	47	402.174	391.072	0.885514		4.59448	47	373.783	361.823	0.903412		4.60231	47	234.52	222.036	0.910373		4.5993	47
4.72717	48	575.956	566.156	0.890566		4.69915	48	330.074	317.245	0.908254		4.69915	48	350.022	336.678	0.866506		4.70315	48	391.615	380.228	0.938742		4.70386	48	466.538	456.887	0.948988		4.69915	48	418.649	407.547	0.922819		4.69644	48	375.581	363.621	0.907901		4.70015	48	238.491	226.007	0.926654		4.69915	48
4.82701	49	571.158	561.358	0.883019		4.799	49	324.976	312.147	0.893659		4.799	49	350.138	336.794	0.866805		4.802	49	381.001	369.614	0.912537		4.8046	49	445.604	435.953	0.905507		4.801	49	423.918	412.816	0.93475		4.7944	49	375.17	363.21	0.906875		4.8	49	244.072	231.588	0.949537		4.799	49
4.92786	50	577.134	567.334	0.892419		4.89884	50	325.467	312.638	0.895064		4.89884	50	372.121	358.777	0.923382		4.90184	50	393.406	382.019	0.943164		4.90433	50	467.13	457.479	0.950218		4.89884	50	413.986	402.884	0.912261		4.89435	50	369.446	357.486	0.892583		4.90084	50	227.12	214.636	0.880032		4.90084	50
5.02771	51	591.222	581.422	0.91458		4.99969	51	326.974	314.145	0.899379		4.99969	51	361.718	348.374	0.896608		5.00169	51	396.856	385.469	0.951681		5.00407	51	457.509	447.858	0.930234		4.99869	51	399.069	387.967	0.878484		4.99431	51	384.465	372.505	0.930083		5.00069	51	239.671	227.187	0.931492		4.99969	51
5.12955	52	590.089	580.289	0.912797		5.09954	52	340.223	327.394	0.93731		5.09954	52	358.619	345.275	0.888632		5.10154	52	380.308	368.921	0.910826		5.10481	52	467.014	457.363	0.949977		5.09954	52	420.732	409.63	0.927536		5.09427	52	366.731	354.771	0.885804		5.10254	52	232.935	220.451	0.903874		5.09954	52
5.2274	53	589.828	580.028	0.912387		5.19938	53	324.141	311.312	0.891268		5.19938	53	367.294	353.95	0.910959		5.20138	53	391.078	379.691	0.937416		5.20454	53	463.802	454.151	0.943305		5.19938	53	413.091	401.989	0.910234		5.19422	53	390.624	378.664	0.945461		5.20038	53	236.229	223.745	0.91738		5.19938	53
5.32725	54	609.361	599.561	0.943112		5.29923	54	330.801	317.972	0.910335		5.29923	54	356.37	343.026	0.882844		5.30223	54	384.528	373.141	0.921245		5.30428	54	473.531	463.88	0.963513		5.29923	54	402.138	391.036	0.885433		5.29518	54	365.164	353.204	0.881892		5.30023	54	223.225	210.741	0.864062		5.29923	54
5.42709	55	601.446	591.646	0.930662		5.39907	55	328.241	315.412	0.903006		5.39907	55	364.405	351.061	0.903524		5.40208	55	396.402	385.015	0.95056		5.40401	55	462.917	453.266	0.941467		5.39907	55	413.712	402.61	0.91164		5.39514	55	370.084	358.124	0.894176		5.40108	55	236.395	223.911	0.91806		5.39907	55
5.52794	56	586.373	576.573	0.906952		5.49992	56	327.766	314.937	0.901646		5.49992	56	359.399	346.055	0.89064		5.50192	56	387.713	376.326	0.929108		5.50475	56	457.194	447.543	0.92958		5.49892	56	418.375	407.273	0.922199		5.49509	56	381.216	369.256	0.921971		5.50092	56	225.524	213.04	0.873488		5.49992	56
5.62779	57	601.29	591.49	0.930417		5.59977	57	325.211	312.382	0.894331		5.59977	57	355.033	341.689	0.879403		5.60177	57	389.833	378.446	0.934342		5.60449	57	458.032	448.381	0.931321		5.59977	57	405.595	394.493	0.893261		5.59505	57	374.657	362.697	0.905594		5.60077	57	225.551	213.067	0.873599		5.59977	57
5.72763	58	585.267	575.467	0.905212		5.69961	58	342.273	329.444	0.943179		5.69961	58	373.755	360.411	0.927588		5.70162	58	380.63	369.243	0.911621		5.70422	58	466.08	456.429	0.948037		5.69961	58	398.941	387.839	0.878194		5.69501	58	377.274	365.314	0.912128		5.70062	58	239.282	226.798	0.929897		5.69961	58
5.82748	59	596.159	586.359	0.922345		5.79746	59	331.766	318.937	0.913098		5.79946	59	360.067	346.723	0.892359		5.80146	59	383.878	372.491	0.91964		5.80496	59	456.544	446.893	0.92823		5.79946	59	402.133	391.031	0.885422		5.79496	59	373.728	361.768	0.903274		5.80046	59	227.823	215.339	0.882914		5.79946	59
5.92732	60	599.843	590.043	0.92814		5.89931	60	340.389	327.56	0.937785		5.89931	60	373.014	359.67	0.92568		5.90231	60	395.312	383.925	0.947869		5.9047	60	465.258	455.607	0.94633		5.89931	60	406.726	395.624	0.895822		5.89292	60	379.105	367.145	0.9167		5.90131	60	231.186	218.702	0.896703		5.89931	60
6.02817	61	594.698	584.898	0.920047		5.99915	61	334.077	321.248	0.919714		6.00015	61	361.656	348.312	0.896448		6.00216	61	390.687	379.3	0.936451		6.00443	61	459.634	449.983	0.934648		5.99915	61	395.044	383.942	0.86937		5.99488	61	377.173	365.213	0.911876		6.00115	61	240.631	228.147	0.935429		6.00015	61
6.12802	62	603.649	593.849	0.934127		6.1	62	327.859	315.03	0.901912		6.1	62	369.765	356.421	0.917319		6.102	62	388.735	377.348	0.931631		6.10517	62	460.149	450.498	0.935718		6.1	62	406.566	395.464	0.895459		6.09483	62	377.225	365.265	0.912006		6.101	62	239.693	227.209	0.931583		6.1	62
6.22786	63	583.479	573.679	0.9024		6.19985	63	332.613	319.784	0.915523		6.19985	63	367.475	354.131	0.911425		6.20185	63	389.245	377.858	0.932891		6.2049	63	470.689	461.038	0.95761		6.19985	63	407.642	396.54	0.897896		6.19479	63	370.081	358.121	0.894168		6.20085	63	243.58	231.096	0.94752		6.19985	63
6.32771	64	581.959	572.159	0.900009		6.29769	64	330.75	317.921	0.910189		6.29969	64	363.99	350.646	0.902455		6.30169	64	391.223	379.836	0.937774		6.30464	64	469.238	459.587	0.954596		6.29969	64	415.886	404.784	0.916563		6.29474	64	369.171	357.211	0.891896		6.30069	64	239.996	227.512	0.932825		6.29969	64
6.42756	65	600.953	591.153	0.929886		6.39954	65	339.001	326.172	0.933811		6.39954	65	360.214	346.87	0.892737		6.40254	65	388.049	376.662	0.929938		6.40438	65	468.152	458.501	0.952341		6.39954	65	407.105	396.003	0.89668		6.3947	65	361.104	349.144	0.871754		6.40154	65	246.091	233.607	0.957815		6.39954	65
6.5284	66	592.105	582.305	0.915969		6.49939	66	333.636	320.807	0.918452		6.49838	66	378.054	364.71	0.938652		6.50239	66	391.439	380.052	0.938307		6.50511	66	458.207	448.556	0.931684		6.49939	66	420.018	408.916	0.925919		6.49566	66	371.157	359.197	0.896855		6.49939	66	240.577	228.093	0.935207		6.50039	66
6.62825	67	601.663	591.863	0.931003		6.60023	67	335.266	322.437	0.923118		6.60023	67	358.034	344.69	0.887127		6.60223	67	389.987	378.6	0.934722		6.60485	67	460.066	450.415	0.935545		6.59923	67	419.194	408.092	0.924053		6.59361	67	370.802	358.842	0.895969		6.60123	67	243.788	231.304	0.948373		6.60023	67
6.7281	68	597.222	587.422	0.924018		6.69808	68	336.047	323.218	0.925354		6.70008	68	365.833	352.489	0.907199		6.70208	68	384.005	372.618	0.919954		6.70459	68	465.932	456.281	0.94773		6.70008	68	414.846	403.744	0.914208		6.69557	68	376.751	364.791	0.910822		6.70008	68	241.035	228.551	0.937085		6.70008	68
6.82794	69	587.058	577.258	0.90803		6.79792	69	331.873	319.044	0.913404		6.79992	69	364.479	351.135	0.903714		6.80193	69	391.078	379.691	0.937416		6.80532	69	476.477	466.826	0.969632		6.79992	69	427.784	416.682	0.943504		6.79353	69	380.544	368.584	0.920293		6.80093	69	236.261	223.777	0.917511		6.79992	69
6.92779	70	588.324	578.524	0.910021		6.89977	70	329.936	317.107	0.907859		6.89977	70	362.578	349.234	0.898821		6.90277	70	376.817	365.43	0.902207		6.90506	70	479.526	469.875	0.975965		6.89977	70	413.82	402.718	0.911885		6.89348	70	378.741	366.781	0.915791		6.90177	70	235.854	223.37	0.915842		6.89977	70
7.02864	71	584.729	574.929	0.904366		6.99862	71	335.214	322.385	0.922969		6.99862	71	363.905	350.561	0.902237		7.00262	71	388.285	376.898	0.93052		7.00379	71	472.886	463.235	0.962174		6.99962	71	418.464	407.362	0.9224		6.99344	71	379.15	367.19	0.916812		7.00162	71	234.69	222.206	0.91107		7.00062	71
7.12848	72	589.313	579.513	0.911577		7.10046	72	326.997	314.168	0.899445		7.10046	72	367.534	354.19	0.911577		7.10046	72	380.726	369.339	0.911858		7.10553	72	463.09	453.439	0.941827		7.09946	72	409.274	398.172	0.901591		7.0934	72	375.05	363.09	0.906575		7.10147	72	231.218	218.734	0.896834		7.10046	72
7.22833	73	605.474	595.674	0.936998		7.20031	73	333.236	320.407	0.917307		7.19831	73	364.634	351.29	0.904113		7.20231	73	400.468	389.081	0.960599		7.20327	73	465.986	456.335	0.947842		7.19831	73	412.999	401.897	0.910026		7.19536	73	372.753	360.793	0.90084		7.19931	73	232.766	220.282	0.903181		7.20031	73
7.32717	74	618.181	608.381	0.956986		7.29816	74	326.04	313.211	0.896705		7.30016	74	364.285	350.941	0.903215		7.30216	74	395.284	383.897	0.9478		7.305	74	464.301	454.65	0.944342		7.30016	74	415.107	404.005	0.914799		7.29431	74	379.126	367.166	0.916752		7.30116	74	241.875	229.391	0.940529		7.29816	74
7.42802	75	593.382	583.582	0.917977		7.4	75	337.163	324.334	0.928549		7.399	75	371.965	358.621	0.922981		7.401	75	399.512	388.125	0.958239		7.40574	75	468.495	458.844	0.953053		7.4	75	414.126	403.024	0.912578		7.39427	75	383.775	371.815	0.92836		7.401	75	242.462	229.978	0.942936		7.4	75
7.52887	76	606.175	596.375	0.938101		7.49885	76	338.862	326.033	0.933413		7.49885	76	385.314	371.97	0.957337		7.50285	76	389.908	378.521	0.934527		7.50548	76	469.368	459.717	0.954866		7.49885	76	416.47	405.368	0.917885		7.49522	76	374.761	362.801	0.905854		7.49985	76	237.293	224.809	0.921742		7.49985	76
7.62871	77	586.138	576.338	0.906582		7.6007	77	321.693	308.864	0.88426		7.6007	77	365.376	352.032	0.906023		7.6007	77	400.457	389.07	0.960572		7.60521	77	467.814	458.163	0.951639		7.5997	77	413.036	401.934	0.910109		7.59418	77	379.743	367.783	0.918293		7.6017	77	240.74	228.256	0.935875		7.6007	77
7.72856	78	604.098	594.298	0.934834		7.69854	78	326.694	313.865	0.898577		7.69854	78	385.598	372.254	0.958068		7.70254	78	399.903	388.516	0.959204		7.70395	78	478.139	468.488	0.973084		7.69854	78	406.942	395.84	0.896311		7.69414	78	378.013	366.053	0.913973		7.69954	78	237.615	225.131	0.923063		7.70054	78
7.82741	79	595.359	585.559	0.921087		7.79839	79	331.79	318.961	0.913167		7.79839	79	371.414	358.07	0.921563		7.80139	79	389.35	377.963	0.93315		7.80568	79	453.586	443.935	0.922086		7.80039	79	422.517	411.415	0.931578		7.79409	79	380.028	368.068	0.919004		7.80139	79	236.623	224.139	0.918995		7.79839	79
7.92825	80	582.157	572.357	0.90032		7.90024	80	333.317	320.488	0.917538		7.90024	80	369.542	356.198	0.916745		7.90124	80	400.783	389.396	0.961377		7.90342	80	460.888	451.237	0.937253		7.89823	80	410.491	399.389	0.904347		7.89405	80	379.701	367.741	0.918188		7.90024	80	235.837	223.353	0.915773		7.90024	80
8.0271	81	609.77	599.97	0.943756		7.99908	81	333.71	320.881	0.918664		7.99908	81	380.939	367.595	0.946077		8.00308	81	397.709	386.322	0.953787		8.00416	81	477.957	468.306	0.972706		7.99908	81	417.646	406.544	0.920548		7.99401	81	376.706	364.746	0.91071		8.00008	81	243.27	230.786	0.946249		8.00008	81
8.12895	82	597.629	587.829	0.924658		8.09893	82	333.853	321.024	0.919073		8.09893	82	372.456	359.112	0.924244		8.10093	82	397.357	385.97	0.952918		8.10389	82	476.882	467.231	0.970474		8.09893	82	404.768	393.666	0.891388		8.09396	82	375.171	363.211	0.906877		8.10193	82	229.838	217.354	0.891176		8.09893	82
8.22679	83	602.267	592.467	0.931953		8.19877	83	335.96	323.131	0.925105		8.19877	83	356.829	343.485	0.884025		8.20278	83	392.868	381.481	0.941835		8.20563	83	489.356	479.705	0.996383		8.19877	83	406.066	394.964	0.894327		8.19392	83	388.086	376.126	0.939124		8.19977	83	232.731	220.247	0.903038		8.19877	83
8.32764	84	614.049	604.249	0.950487		8.29862	84	341.02	328.191	0.939592		8.29862	84	370.838	357.494	0.92008		8.30162	84	387.824	376.437	0.929382		8.30536	84	470.689	461.038	0.95761		8.30062	84	398.123	387.021	0.876342		8.29388	84	384.85	372.89	0.931044		8.30062	84	231.2	218.716	0.89676		8.29862	84
8.42748	85	587.545	577.745	0.908796		8.39947	85	318.364	305.535	0.874729		8.39947	85	366.243	352.899	0.908254		8.40147	85	397.929	386.542	0.95433		8.4041	85	476.789	467.138	0.97028		8.39847	85	413.681	402.579	0.91157		8.39483	85	396.928	384.968	0.961201		8.40047	85	237.851	225.367	0.92403		8.40047	85
8.52733	86	597.284	587.484	0.924115		8.49931	86	330.739	317.91	0.910158		8.49931	86	365.783	352.439	0.90707		8.50332	86	400.834	389.447	0.961503		8.50384	86	467.837	458.186	0.951686		8.49931	86	419.897	408.795	0.925645		8.49579	86	382.291	370.331	0.924655		8.50031	86	243.282	230.798	0.946298		8.49931	86
8.62718	87	588.886	579.086	0.910905		8.59916	87	326.836	314.007	0.898984		8.59916	87	377.141	363.797	0.936302		8.60116	87	402.682	391.295	0.966065		8.60557	87	469.491	459.84	0.955122		8.59916	87	402.93	391.828	0.887226		8.59475	87	379.782	367.822	0.91839		8.60216	87	228.836	216.352	0.887068		8.59916	87
8.72702	88	600.51	590.71	0.92919		8.69901	88	336.305	323.476	0.926093		8.69901	88	357.809	344.465	0.886547		8.70201	88	415.015	403.628	0.996514		8.70431	88	486.374	476.723	0.990189		8.69901	88	412.716	401.614	0.909385		8.6947	88	382.349	370.389	0.9248		8.70001	88	242.048	229.564	0.941238		8.70101	88
8.82787	89	601.828	592.028	0.931263		8.79885	89	336.867	324.038	0.927702		8.79885	89	374.47	361.126	0.929428		8.80185	89	411.159	399.772	0.986994		8.80605	89	473.503	463.852	0.963455		8.80085	89	411.375	400.273	0.906348		8.79466	89	388.931	376.971	0.941234		8.80085	89	237.366	224.882	0.922042		8.79885	89
8.92772	90	590.455	580.655	0.913373		8.8997	90	343.696	330.867	0.947253		8.8997	90	365.493	352.149	0.906324		8.9017	90	389.216	377.829	0.932819		8.90578	90	475.617	465.966	0.967846		8.8987	90	410.027	398.925	0.903296		8.89462	90	380.88	368.92	0.921132		8.9007	90	244.502	232.018	0.9513		8.8997	90
9.02756	91	596.267	586.467	0.922515		8.99955	91	335.104	322.275	0.922654		8.99955	91	366.641	353.297	0.909278		9.00155	91	397.816	386.429	0.954051		9.00452	91	457.818	448.167	0.930876		8.99955	91	409.803	398.701	0.902789		8.99457	91	385.647	373.687	0.933034		9.00055	91	237.227	224.743	0.921472		8.99955	91
9.12741	92	586.687	576.887	0.907446		9.09939	92	334.596	321.767	0.9212		9.09939	92	371.818	358.474	0.922602		9.10139	92	406.88	395.493	0.976429		9.10425	92	460.81	451.159	0.937091		9.09939	92	414.035	402.933	0.912372		9.09453	92	391.53	379.57	0.947723		9.10039	92	232.899	220.415	0.903726		9.09939	92
9.22726	93	585.93	576.13	0.906255		9.19924	93	335.581	322.752	0.92402		9.19924	93	364.548	351.204	0.903892		9.20224	93	405.758	394.371	0.973659		9.20399	93	471.094	461.443	0.958451		9.19924	93	405.366	394.264	0.892742		9.19449	93	377.832	365.872	0.913521		9.20024	93	235.445	222.961	0.914165		9.19924	93
9.3271	94	584.87	575.07	0.904588		9.29908	94	330.422	317.593	0.90925		9.29908	94	374.497	361.153	0.929497		9.30209	94	406.615	395.228	0.975775		9.30473	94	475.152	465.501	0.96688		9.29908	94	418.97	407.868	0.923546		9.29444	94	371.27	359.31	0.897137		9.30109	94	236.576	224.092	0.918803		9.29908	94
9.42795	95	595.824	586.024	0.921819		9.39993	95	331.067	318.238	0.911097		9.39993	95	358.439	345.095	0.888169		9.40193	95	409.932	398.545	0.983965		9.40446	95	468.188	458.537	0.952415		9.39893	95	403.212	392.11	0.887865		9.3944	95	381.108	369.148	0.921701		9.40093	95	235.549	223.065	0.914592		9.39993	95
9.52779	96	596.341	586.541	0.922632		9.49978	96	334.043	321.214	0.919617		9.49978	96	358.157	344.813	0.887443		9.50178	96	397.649	386.262	0.953639		9.5042	96	468.292	458.641	0.952631		9.49978	96	405.914	394.812	0.893983		9.49536	96	384.24	372.28	0.929521		9.50078	96	237.997	225.513	0.924629		9.49978	96
9.62764	97	600.234	590.434	0.928755		9.59962	97	326.979	314.15	0.899393		9.59962	97	370.497	357.153	0.919202		9.60163	97	406.424	395.037	0.975304		9.60493	97	466.969	457.318	0.949884		9.59962	97	415.342	404.24	0.915331		9.59531	97	380.062	368.102	0.919089		9.60062	97	242.98	230.496	0.94506		9.59962	97
9.72749	98	604.435	594.635	0.935364		9.69947	98	332.476	319.647	0.915131		9.69947	98	368.559	355.215	0.914215		9.70247	98	400.387	389	0.960399		9.70467	98	453.911	444.26	0.922761		9.69947	98	412.262	401.16	0.908357		9.69527	98	388.139	376.179	0.939256		9.70047	98	243.529	231.045	0.947311		9.69947	98
9.82733	99	591.092	581.292	0.914375		9.79832	99	332.252	319.423	0.914489		9.79932	99	383.043	369.699	0.951492		9.80232	99	405.128	393.741	0.972104		9.80441	99	461.255	451.604	0.938015		9.79932	99	411.367	400.265	0.90633		9.79523	99	392.701	380.741	0.950647		9.80132	99	240.206	227.722	0.933686		9.79932	99
9.92818	100	601.237	591.437	0.930333		9.89916	100	336.324	323.495	0.926147		9.90016	100	366.712	353.368	0.909461		9.90216	100	400.555	389.168	0.960814		9.90514	100	454.087	444.436	0.923127		9.89916	100	412.652	401.55	0.90924		9.89518	100	381.271	369.311	0.922108		9.90116	100	241.624	229.14	0.9395		9.90016	100
10.028	101	597.919	588.119	0.925114		10	101	324.366	311.537	0.891912		9.99801	101	369.834	356.49	0.917496		10.002	101	394.2	382.813	0.945124		10.0049	101	460.26	450.609	0.935948		10	101	411.861	400.759	0.907449		9.99514	101	388.6	376.64	0.940407		10.001	101	240.963	228.479	0.93679		10	101
10.1279	102	601.329	591.529	0.930478		10.0999	102	334.752	321.923	0.921647		10.0999	102	361.312	347.968	0.895563		10.1019	102	390.54	379.153	0.936088		10.1046	102	464.52	454.869	0.944797		10.0999	102	416.822	405.72	0.918682		10.0931	102	386.119	374.159	0.934213		10.1009	102	239.56	227.076	0.931037		10.0999	102
10.2277	103	617.045	607.245	0.955199		10.1997	103	337.669	324.84	0.929998		10.1997	103	360.765	347.421	0.894155		10.2007	103	400.091	388.704	0.959668		10.2044	103	457.723	448.072	0.930679		10.1997	103	414.774	403.672	0.914045		10.1951	103	389.039	377.079	0.941503		10.2007	103	247.333	234.849	0.962908		10.1997	103
10.3266	104	606.59	596.79	0.938753		10.2985	104	335.584	322.755	0.924029		10.2995	104	375.768	362.424	0.932768		10.3026	104	388.899	377.512	0.932036		10.3051	104	464.775	455.124	0.945326		10.2995	104	413.784	402.682	0.911803		10.295	104	371.53	359.57	0.897786		10.3015	104	236.038	223.554	0.916597		10.2995	104
10.4284	105	606.484	596.684	0.938587		10.3994	105	323.376	310.547	0.889078		10.4004	105	368.179	354.835	0.913237		10.4024	105	388.382	376.995	0.93076		10.4048	105	465.364	455.713	0.94655		10.3994	105	421.547	410.445	0.929381		10.394	105	366.493	354.533	0.88521		10.4014	105	239.096	226.612	0.929135		10.4004	105
10.5283	106	612.572	602.772	0.948163		10.5002	106	333.851	321.022	0.919067		10.5002	106	365.338	351.994	0.905925		10.5022	106	394.792	383.405	0.946586		10.5046	106	470.914	461.263	0.958078		10.4982	106	410.118	399.016	0.903502		10.4949	106	381.264	369.304	0.922091		10.4992	106	235.806	223.322	0.915645		10.5002	106
10.6281	107	591.946	582.146	0.915718		10.6001	107	332.57	319.741	0.9154		10.6001	107	368.05	354.706	0.912905		10.6021	107	403.987	392.6	0.969287		10.6053	107	451.698	442.047	0.918165		10.6001	107	415.457	404.355	0.915591		10.5939	107	384.893	372.933	0.931152		10.6011	107	234.314	221.83	0.909528		10.6001	107
10.728	108	600.896	591.096	0.929797		10.6999	108	332.821	319.992	0.916118		10.6999	108	373.557	360.213	0.927078		10.7019	108	393.251	381.864	0.942781		10.705	108	456.48	446.829	0.928097		10.6999	108	419.916	408.814	0.925688		10.6958	108	381.626	369.666	0.922994		10.6999	108	230.264	217.78	0.892923		10.6999	108
10.8278	109	593.258	583.458	0.917782		10.7988	109	330.734	317.905	0.910143		10.7998	109	361.169	347.825	0.895195		10.8028	109	403.582	392.195	0.968287		10.8048	109	453.898	444.247	0.922734		10.7998	109	418.504	407.402	0.922491		10.7938	109	391.74	379.78	0.948247		10.8018	109	238.161	225.677	0.925301		10.7998	109
10.9286	110	592.266	582.466	0.916222		10.8996	110	331.45	318.621	0.912193		10.8986	110	367.163	353.819	0.910622		10.9006	110	396.081	384.694	0.949768		10.9055	110	451.407	441.756	0.91756		10.8996	110	427.375	416.273	0.942578		10.8937	110	387.766	375.806	0.938325		10.9016	110	242.739	230.255	0.944072		10.9006	110
11.0285	111	580.621	570.821	0.897904		10.9985	111	325.027	312.198	0.893805		10.9985	111	371.957	358.613	0.92296		11.0025	111	384.677	373.29	0.921613		11.0052	111	464.897	455.246	0.94558		10.9985	111	411.293	400.191	0.906163		10.9957	111	390.251	378.291	0.94453		10.9995	111	233.322	220.838	0.905461		11.0005	111
11.1283	112	591.127	581.327	0.91443		11.1003	112	335.866	323.037	0.924836		11.0983	112	366.626	353.282	0.90924		11.1023	112	405.421	394.034	0.972827		11.105	112	467.222	457.571	0.950409		11.1003	112	418.362	407.26	0.922169		11.0937	112	388.315	376.355	0.939696		11.1013	112	241.487	229.003	0.938938		11.0983	112
11.2282	113	599.8	590	0.928073		11.1982	113	318.337	305.508	0.874652		11.1982	113	376.987	363.643	0.935906		11.2022	113	392.782	381.395	0.941623		11.2057	113	461.24	451.589	0.937984		11.2002	113	421.588	410.486	0.929474		11.1936	113	373.193	361.233	0.901939		11.2002	113	248.649	236.165	0.968303		11.2002	113
11.327	114	602.412	592.612	0.932181		11.299	114	317.619	304.79	0.872596		11.3	114	375.529	362.185	0.932153		11.303	114	379.631	368.244	0.909155		11.3054	114	453.367	443.716	0.921631		11.3	114	420.873	409.771	0.927855		11.2936	114	379.634	367.674	0.918021		11.301	114	241.869	229.385	0.940504		11.299	114
11.4289	115	594.193	584.393	0.919253		11.3999	115	337.063	324.234	0.928263		11.3989	115	373.758	360.414	0.927595		11.4009	115	407.68	396.293	0.978405		11.4052	115	468.558	458.907	0.953184		11.3999	115	416.21	405.108	0.917296		11.3945	115	384.782	372.822	0.930874		11.4019	115	227.073	214.589	0.879839		11.3999	115
11.5267	116	600.729	590.929	0.929534		11.4987	116	327.228	314.399	0.900106		11.4987	116	375.335	361.991	0.931654		11.5027	116	392.229	380.842	0.940258		11.5039	116	463.365	453.714	0.942398		11.4987	116	409.637	398.535	0.902413		11.4945	116	392.892	380.932	0.951124		11.4997	116	233.951	221.467	0.90804		11.5007	116
11.6286	117	588.895	579.095	0.910919		11.5986	117	322.726	309.897	0.887217		11.5986	117	368.828	355.484	0.914907		11.6016	117	399.474	388.087	0.958145		11.6057	117	457.005	447.354	0.929188		11.6006	117	410.636	399.534	0.904675		11.5944	117	382.568	370.608	0.925346		11.5996	117	245.307	232.823	0.954601		11.5986	117
11.7274	118	598.134	588.334	0.925452		11.6984	118	327.631	314.802	0.90126		11.6984	118	365.179	351.835	0.905516		11.7024	118	399.937	388.55	0.959288		11.7034	118	461.045	451.394	0.937579		11.6984	118	410.013	398.911	0.903264		11.6944	118	375.992	364.032	0.908927		11.7004	118	238.6	226.116	0.927101		11.7004	118
11.8273	119	598.665	588.865	0.926287		11.7992	119	334.496	321.667	0.920914		11.8002	119	374.855	361.511	0.930419		11.8032	119	390.509	379.122	0.936011		11.8051	119	454.741	445.09	0.924485		11.8002	119	398.345	387.243	0.876844		11.7944	119	386.73	374.77	0.935738		11.8012	119	236.165	223.681	0.917117		11.7992	119
11.9291	120	602.863	593.063	0.932891		11.9001	120	324.469	311.64	0.892207		11.8991	120	387.332	373.988	0.962531		11.9011	120	391.1	379.713	0.93747		11.9059	120	466.299	456.648	0.948492		11.8991	120	409.346	398.244	0.901754		11.8943	120	390.551	378.591	0.945279		11.9001	120	237.859	225.375	0.924063		11.9001	120
12.027	121	593.124	583.324	0.917571		11.9989	121	335.563	322.734	0.923969		11.9989	121	371.323	357.979	0.921328		12.0009	121	401.569	390.182	0.963317		12.0036	121	462.343	452.692	0.940275		11.9989	121	414.097	402.995	0.912512		11.9943	121	373.03	361.07	0.901532		11.9999	121	240.571	228.087	0.935183		12.0009	121
12.1288	122	598.766	588.966	0.926446		12.0988	122	333.261	320.432	0.917378		12.0988	122	368.307	354.963	0.913566		12.1018	122	409.667	398.28	0.98331		12.1043	122	464.871	455.22	0.945526		12.1008	122	423.398	412.296	0.933572		12.0942	122	391.527	379.567	0.947716		12.0998	122	229.976	217.492	0.891742		12.0988	122
12.2276	123	602.235	592.435	0.931903		12.1986	123	320.528	307.699	0.880924		12.1986	123	372.039	358.695	0.923171		12.2026	123	395.15	383.763	0.947469		12.2041	123	470.171	460.52	0.956534		12.1986	123	414.29	403.188	0.912949		12.1942	123	386.805	374.845	0.935926		12.2006	123	234.669	222.185	0.910984		12.1986	123
12.3275	124	610.723	600.923	0.945255		12.2995	124	327.977	315.148	0.90225		12.2995	124	371.408	358.064	0.921547		12.3015	124	400.04	388.653	0.959542		12.3038	124	458.278	448.627	0.931832		12.2985	124	424.915	413.813	0.937007		12.2941	124	388.978	377.018	0.941351		12.3015	124	239.42	226.936	0.930463		12.2995	124
12.4293	125	618.541	608.741	0.957552		12.3993	125	342.951	330.122	0.94512		12.3993	125	377.9	364.556	0.938256		12.4013	125	388.827	377.44	0.931859		12.4045	125	452.215	442.564	0.919238		12.3993	125	413.617	402.515	0.911425		12.3941	125	399.113	387.153	0.966657		12.4003	125	239.221	226.737	0.929647		12.4003	125
12.5272	126	610.364	600.564	0.94469		12.4992	126	324.12	311.291	0.891208		12.4992	126	375.729	362.385	0.932668		12.5012	126	381.926	370.539	0.914821		12.5043	126	453.995	444.344	0.922936		12.4992	126	422.82	411.718	0.932264		12.4941	126	389.99	378.03	0.943878		12.5002	126	235.154	222.67	0.912972		12.4992	126
12.627	127	604.759	594.959	0.935873		12.599	127	329.31	316.481	0.906067		12.599	127	370.811	357.467	0.920011		12.602	127	392.416	381.029	0.940719		12.606	127	469.88	460.229	0.95593		12.599	127	400.972	389.87	0.882793		12.595	127	380.425	368.465	0.919996		12.6	127	239.016	226.532	0.928807		12.599	127
12.7279	128	599.751	589.951	0.927996		12.6989	128	326.212	313.383	0.897197		12.6989	128	374.828	361.484	0.930349		12.7019	128	387.654	376.267	0.928963		12.7048	128	451.692	442.041	0.918152		12.6989	128	429.361	418.259	0.947075		12.695	128	390.558	378.598	0.945296		12.7009	128	237.564	225.08	0.922853		12.6989	128
12.8277	129	597.028	587.228	0.923712		12.7997	129	328.668	315.839	0.904229		12.7997	129	374.385	361.041	0.929209		12.8017	129	404.441	393.054	0.970408		12.8045	129	469.438	459.787	0.955012		12.7987	129	414.782	403.68	0.914063		12.7949	129	381.401	369.441	0.922433		12.8007	129	236.501	224.017	0.918495		12.7997	129
12.9296	130	581.674	571.874	0.899561		12.8996	130	329.416	316.587	0.90637		12.8996	130	369.561	356.217	0.916794		12.9016	130	392.34	380.953	0.940532		12.9042	130	462.076	452.425	0.93972		12.8996	130	426.563	415.461	0.940739		12.8949	130	393.892	381.932	0.953621		12.9006	130	245.832	233.348	0.956753		12.9006	130
13.0274	131	590.012	580.212	0.912676		12.9994	131	324.039	311.21	0.890976		12.9994	131	375.301	361.957	0.931567		13.0014	131	398.229	386.842	0.955071		13.004	131	464.747	455.096	0.945268		12.9994	131	423.093	411.991	0.932882		12.9948	131	378.992	367.032	0.916418		13.0004	131	240.78	228.296	0.936039		12.9994	131
13.1273	132	602.426	592.626	0.932203		13.0992	132	329.903	317.074	0.907764		13.0992	132	375.438	362.094	0.931919		13.1022	132	395.83	384.443	0.949148		13.1047	132	461.723	452.072	0.938987		13.0992	132	420.193	409.091	0.926315		13.0948	132	369.706	357.746	0.893232		13.1002	132	237.634	225.15	0.923141		13.0992	132
13.2271	133	607.806	598.006	0.940666		13.1991	133	325.272	312.443	0.894506		13.1991	133	374.61	361.266	0.929788		13.2021	133	388.01	376.623	0.929841		13.2044	133	476.829	467.178	0.970363		13.1991	133	421.192	410.09	0.928577		13.1948	133	382.623	370.663	0.925484		13.2011	133	244.371	231.887	0.950763		13.1991	133
13.328	134	599.375	589.575	0.927404		13.2999	134	326.904	314.075	0.899178		13.2999	134	376.227	362.883	0.93395		13.3019	134	401.093	389.706	0.962142		13.3042	134	467.253	457.602	0.950473		13.2989	134	428.273	417.171	0.944611		13.2947	134	386.607	374.647	0.935431		13.3009	134	228.487	216.003	0.885637		13.2999	134
13.4278	135	600.108	590.308	0.928557		13.3998	135	339.188	326.359	0.934347		13.3998	135	380.176	366.832	0.944113		13.4018	135	395.629	384.242	0.948652		13.4049	135	469.018	459.367	0.954139		13.3998	135	421.935	410.833	0.93026		13.3947	135	375.447	363.487	0.907566		13.4008	135	237.718	225.234	0.923485		13.3998	135
13.5277	136	611.927	602.127	0.947149		13.4996	136	333.162	320.333	0.917095		13.4996	136	367.132	353.788	0.910542		13.5016	136	400.68	389.293	0.961122		13.5046	136	466.824	457.173	0.949582		13.4996	136	425.441	414.339	0.938198		13.4946	136	385.448	373.488	0.932537		13.5006	136	235.941	223.457	0.916199		13.4996	136
13.6275	137	587.763	577.963	0.909139		13.5995	137	333.156	320.327	0.917077		13.5995	137	371.785	358.441	0.922517		13.6025	137	395.573	384.186	0.948514		13.6044	137	471.394	461.743	0.959075		13.5995	137	424.848	413.746	0.936856		13.5946	137	385.32	373.36	0.932218		13.6005	137	249.477	236.993	0.971698		13.5995	137
13.7273	138	598.061	588.261	0.925337		13.6993	138	334.941	322.112	0.922188		13.6993	138	391.602	378.258	0.97352		13.7023	138	388.959	377.572	0.932184		13.7051	138	462.159	452.508	0.939893		13.6993	138	401.063	389.961	0.882999		13.6945	138	378.304	366.344	0.9147		13.7013	138	235.178	222.694	0.913071		13.6993	138
13.8282	139	598.581	588.781	0.926155		13.7982	139	321.242	308.413	0.882968		13.8002	139	378.157	364.813	0.938917		13.8022	139	402.503	391.116	0.965623		13.8049	139	472.226	462.575	0.960803		13.7992	139	429.89	418.788	0.948272		13.7955	139	392.298	380.338	0.949641		13.8012	139	230.132	217.648	0.892381		13.8002	139
13.928	140	616.623	606.823	0.954535		13.9	140	328.528	315.699	0.903828		13.9	140	375.541	362.197	0.932184		13.902	140	382.5	371.113	0.916238		13.9046	140	460.107	450.456	0.935631		13.9	140	429.754	418.652	0.947964		13.8954	140	378.356	366.396	0.91483		13.901	140	234.553	222.069	0.910508		13.9	140
14.0279	141	605.831	596.031	0.93756		13.9979	141	338.384	325.555	0.932045		13.9979	141	368.651	355.307	0.914451		14.0019	141	403.673	392.286	0.968512		14.0043	141	466.928	457.277	0.949798		13.9979	141	410.531	399.429	0.904437		13.9954	141	375.838	363.878	0.908543		14.0009	141	244.091	231.607	0.949615		13.9999	141
14.1277	142	597.066	587.266	0.923772		14.0997	142	342.28	329.451	0.943199		14.0997	142	376.242	362.898	0.933988		14.1017	142	392.317	380.93	0.940475		14.1051	142	469.243	459.592	0.954607		14.0997	142	413.154	402.052	0.910377		14.0934	142	381.675	369.715	0.923117		14.1007	142	228.689	216.205	0.886465		14.0997	142
14.2276	143	599.354	589.554	0.927371		14.1996	143	333.397	320.568	0.917767		14.1996	143	378.247	364.903	0.939149		14.2026	143	408.895	397.508	0.981404		14.2048	143	468.549	458.898	0.953165		14.1996	143	397.945	386.843	0.875939		14.1953	143	395.481	383.521	0.957588		14.2016	143	237.215	224.731	0.921423		14.1996	143
14.3284	144	598.941	589.141	0.926722		14.2984	144	322.129	309.3	0.885508		14.3004	144	373.509	360.165	0.926954		14.3024	144	404.962	393.575	0.971694		14.3045	144	471.547	461.896	0.959392		14.2994	144	422.343	411.241	0.931184		14.2933	144	386.066	374.106	0.93408		14.3014	144	241.408	228.924	0.938614		14.3004	144
14.4283	145	611.885	602.085	0.947083		14.4003	145	335.948	323.119	0.925071		14.4003	145	381.824	368.48	0.948355		14.4023	145	409.785	398.398	0.983602		14.4053	145	469.665	460.014	0.955483		14.3993	145	420.307	409.205	0.926573		14.3952	145	385.676	373.716	0.933107		14.4013	145	232.673	220.189	0.9028		14.4003	145
14.5281	146	618.083	608.283	0.956832		14.5001	146	324.812	311.983	0.893189		14.5001	146	375.149	361.805	0.931175		14.5021	146	399.263	387.876	0.957624		14.503	146	459.83	450.179	0.935055		14.4981	146	411.974	400.872	0.907705		14.4952	146	383.032	371.072	0.926505		14.5001	146	240.239	227.755	0.933821		14.5001	146
14.5999	147	606.4	596.6	0.938455		14.5999	147	334.573	321.744	0.921134		14.5999	147	364.894	351.55	0.904782		14.6009	147	401.074	389.687	0.962095		14.6047	147	460.063	450.412	0.935539		14.5999	147	415.012	403.91	0.914584		14.5951	147	371.349	359.389	0.897334		14.6009	147	236.309	223.825	0.917708		14.5999	147
14.7278	148	597.348	587.548	0.924216		14.6988	148	340.008	327.179	0.936694		14.6988	148	377.925	364.581	0.93832		14.7028	148	395.135	383.748	0.947432		14.7055	148	456.216	446.565	0.927549		14.6978	148	415.092	403.99	0.914765		14.6951	148	380.328	368.368	0.919754		14.6998	148	237.345	224.861	0.921956		14.6998	148
14.8287	149	589.666	579.866	0.912132		14.7986	149	323.358	310.529	0.889026		14.7996	149	372.987	359.643	0.925611		14.8026	149	395.331	383.944	0.947916		14.8052	149	464.571	454.92	0.944903		14.7996	149	418.518	407.416	0.922522		14.7941	149	388.891	376.931	0.941134		14.8016	149	244.769	232.285	0.952395		14.8006	149
14.9285	150	586.257	576.457	0.90677		14.9005	150	322.837	310.008	0.887535		14.9005	150	372.445	359.101	0.924216		14.9005	150	390.57	379.183	0.936162		14.905	150	480.587	470.936	0.978169		14.8995	150	412.459	401.357	0.908803		14.894	150	388.839	376.879	0.941004		14.8995	150	238.839	226.355	0.928081		14.9005	150
15.0283	151	593.798	583.998	0.918632		14.9983	151	341.888	329.059	0.942077		14.9983	151	370.319	356.975	0.918744		15.0023	151	393.931	382.544	0.94446		15.0037	151	466.695	457.044	0.949314		14.9983	151	409.466	398.364	0.902026		14.994	151	371.638	359.678	0.898056		14.9993	151	238.809	226.325	0.927958		15.0003	151
15.1282	152	595.456	585.656	0.92124		15.1002	152	347.472	334.643	0.958063		15.1002	152	364.426	351.082	0.903578		15.1012	152	399.199	387.812	0.957466		15.1054	152	453.843	444.192	0.92262		15.1002	152	414.251	403.149	0.912861		15.0939	152	379.536	367.576	0.917776		15.1002	152	239.776	227.292	0.931923		15.0982	152
15.228	153	595.562	585.762	0.921406		15.2	153	332.182	319.353	0.914289		15.199	153	372.964	359.62	0.925552		15.203	153	401.122	389.735	0.962214		15.2042	153	466.141	456.49	0.948164		15.2	153	417.429	406.327	0.920057		15.1939	153	385.654	373.694	0.933052		15.201	153	235.752	223.268	0.915424		15.2	153
15.3289	154	612.06	602.26	0.947358		15.2989	154	332.087	319.258	0.914017		15.2999	154	372.248	358.904	0.923709		15.3009	154	405.812	394.425	0.973793		15.3049	154	460.397	450.746	0.936233		15.2999	154	422.325	411.223	0.931143		15.2938	154	373.098	361.138	0.901701		15.3019	154	233.104	220.62	0.904567		15.2999	154
15.4287	155	602.007	592.207	0.931544		15.3987	155	331.999	319.17	0.913765		15.3987	155	374.837	361.493	0.930372		15.4007	155	395.806	384.419	0.949089		15.4056	155	465.474	455.823	0.946778		15.3997	155	418.559	407.457	0.922615		15.3938	155	389.167	377.207	0.941823		15.3997	155	236.101	223.617	0.916855		15.4007	155
15.5266	156	599.379	589.579	0.927411		15.4986	156	339.866	327.037	0.936288		15.4986	156	371.32	357.976	0.921321		15.5026	156	401.172	389.785	0.962337		15.5034	156	466.129	456.478	0.948139		15.4986	156	408.448	397.346	0.899721		15.4958	156	376.261	364.301	0.909599		15.4996	156	237.421	224.937	0.922267		15.5006	156
15.6284	157	598.113	588.313	0.925419		15.5984	157	332.06	319.231	0.91394		15.5984	157	362.794	349.45	0.899377		15.6014	157	397.88	386.493	0.954209		15.6051	157	466.12	456.469	0.94812		15.5984	157	417.802	406.7	0.920901		15.5937	157	389.339	377.379	0.942252		15.6004	157	232.805	220.321	0.903341		15.5984	157
15.7283	158	595.942	586.142	0.922004		15.6993	158	322.842	310.013	0.887549		15.6993	158	365.964	352.62	0.907536		15.7033	158	403.157	391.77	0.967238		15.7038	158	465.507	455.856	0.946847		15.6983	158	431.736	420.634	0.952452		15.6947	158	377.693	365.733	0.913174		15.7003	158	241.724	229.24	0.93991		15.7003	158
15.8271	159	600.135	590.335	0.9286		15.7991	159	324.009	311.18	0.89089		15.8001	159	369.814	356.47	0.917445		15.8011	159	394.235	382.848	0.94521		15.8056	159	458.418	448.767	0.932122		15.8001	159	414.733	403.631	0.913952		15.7946	159	387.44	375.48	0.937511		15.8021	159	242.492	230.008	0.943059		15.7991	159
15.927	160	591.481	581.681	0.914987		15.9009	160	339.065	326.236	0.933995		15.8989	160	362.547	349.203	0.898742		15.9009	160	395.954	384.567	0.949454		15.9043	160	465.57	455.919	0.946978		15.8989	160	416.83	405.728	0.9187		15.8946	160	385.294	373.334	0.932153		15.8999	160	236.424	223.94	0.918179		15.9009	160
16.0268	161	594.851	585.051	0.920288		15.9988	161	326.655	313.826	0.898465		15.9988	161	379.049	365.705	0.941213		16.0018	161	396.004	384.617	0.949578		16.004	161	479.864	470.213	0.976667		15.9988	161	410.791	399.689	0.905026		15.9945	161	383.918	371.958	0.928717		15.9998	161	237.601	225.117	0.923005		15.9988	161
16.1287	162	588.956	579.156	0.911015		16.0986	162	339.394	326.565	0.934937		16.0986	162	377.428	364.084	0.937041		16.1016	162	407.25	395.863	0.977343		16.1038	162	472.883	463.232	0.962167		16.0986	162	425.934	414.832	0.939315		16.0945	162	384.85	372.89	0.931044		16.1006	162	233.06	220.576	0.904387		16.0986	162
16.2275	163	591.39	581.59	0.914844		16.1995	163	330.593	317.764	0.90974		16.1995	163	364.85	351.506	0.904669		16.2035	163	389.291	377.904	0.933004		16.2045	163	472.442	462.791	0.961251		16.1985	163	428.504	417.402	0.945134		16.1945	163	392.642	380.682	0.9505		16.2005	163	241.241	228.757	0.93793		16.1995	163
16.3273	164	610.862	601.062	0.945473		16.2993	164	340.14	327.311	0.937072		16.2993	164	382.608	369.264	0.950372		16.3013	164	395.381	383.994	0.94804		16.3043	164	465.208	455.557	0.946226		16.2993	164	444.771	433.669	0.981968		16.2944	164	380.239	368.279	0.919531		16.3003	164	237.501	225.017	0.922595		16.2993	164
16.4272	165	588.75	578.95	0.910691		16.3992	165	340.891	328.062	0.939222		16.3992	165	363.77	350.426	0.901889		16.4012	165	403.137	391.75	0.967188		16.404	165	475.896	466.245	0.968426		16.3992	165	418.762	407.66	0.923075		16.3944	165	388.72	376.76	0.940707		16.4002	165	243.31	230.826	0.946413		16.4012	165
16.527	166	607.087	597.287	0.939535		16.499	166	337.726	324.897	0.930161		16.499	166	374.513	361.169	0.929538		16.502	166	400.418	389.031	0.960476		16.5047	166	457.558	447.907	0.930336		16.499	166	421.851	410.749	0.930069		16.4943	166	391.479	379.519	0.947596		16.5	166	236.947	224.463	0.920324		16.499	166
16.6279	167	597.719	587.919	0.924799		16.6009	167	331.418	318.589	0.912102		16.5989	167	366.703	353.359	0.909438		16.6019	167	410.003	398.616	0.98414		16.6045	167	452.405	442.754	0.919633		16.5989	167	424.191	413.089	0.935368		16.5943	167	376.807	364.847	0.910962		16.6009	167	228.098	215.614	0.884042		16.5989	167
16.7277	168	593.022	583.222	0.917411		16.6997	168	342.962	330.133	0.945151		16.6997	168	366.135	352.791	0.907976		16.7017	168	397.338	385.951	0.952871		16.7042	168	460.708	451.057	0.936879		16.6987	168	421.106	410.004	0.928383		16.6942	168	386.32	374.36	0.934715		16.7007	168	233.239	220.755	0.905121		16.6997	168
16.8276	169	611.749	601.949	0.946869		16.7996	169	326.065	313.236	0.896776		16.7996	169	370.226	356.882	0.918505		16.8016	169	400.994	389.607	0.961898		16.8059	169	468.734	459.083	0.95355		16.7996	169	416.294	405.192	0.917487		16.7942	169	395.814	383.854	0.958419		16.8006	169	234.43	221.946	0.910004		16.7996	169
16.9294	170	593.853	584.053	0.918718		16.8994	170	333.53	320.701	0.918148		16.8994	170	381.04	367.696	0.946337		16.9014	170	409.624	398.237	0.983204		16.9047	170	467.968	458.317	0.951959		16.8994	170	410.354	399.252	0.904037		16.8951	170	397.76	385.8	0.963278		16.9004	170	248.128	235.644	0.966167		16.8994	170
17.0273	171	615.908	606.108	0.953411		16.9993	171	326.448	313.619	0.897873		16.9993	171	378.995	365.651	0.941074		17.0023	171	412.704	401.317	0.990808		17.0044	171	475.273	465.622	0.967132		16.9993	171	402.041	390.939	0.885213		16.9951	171	380.863	368.903	0.921089		17.0003	171	230.664	218.18	0.894563		16.9993	171
17.1271	172	596.633	586.833	0.923091		17.0991	172	332.595	319.766	0.915471		17.0991	172	384.407	371.063	0.955003		17.1021	172	411.989	400.602	0.989043		17.1041	172	471.42	461.769	0.959129		17.0991	172	416.651	405.549	0.918295		17.0951	172	379.077	367.117	0.91663		17.1011	172	228.994	216.51	0.887716		17.0991	172
17.228	173	609.83	600.03	0.94385		17.2	173	331.499	318.67	0.912334		17.2	173	383.629	370.285	0.953		17.202	173	398.653	387.266	0.956118		17.2049	173	472.906	463.255	0.962215		17.1989	173	417.305	406.203	0.919776		17.195	173	378.18	366.22	0.91439		17.201	173	232.924	220.44	0.903829		17.2	173
17.3278	174	607.088	597.288	0.939537		17.2998	174	333.783	320.954	0.918873		17.2998	174	377.903	364.559	0.938263		17.3018	174	395.652	384.265	0.948709		17.3046	174	466.041	456.39	0.947956		17.2998	174	431.909	420.807	0.952844		17.295	174	396.652	384.692	0.960512		17.3028	174	242.312	229.828	0.942321		17.2998	174
17.4277	175	609.163	599.363	0.942801		17.3996	175	329.347	316.518	0.906173		17.3996	175	388.287	374.943	0.964988		17.4016	175	402.663	391.276	0.966018		17.4044	175	468.129	458.478	0.952293		17.3996	175	420.681	409.579	0.92742		17.3949	175	401.632	389.672	0.972946		17.4006	175	240.098	227.614	0.933243		17.3996	175
17.5275	176	599.955	590.155	0.928317		17.4995	176	332.598	319.769	0.91548		17.4995	176	374.089	360.745	0.928447		17.5025	176	382.208	370.821	0.915517		17.5051	176	470.529	460.878	0.957278		17.4995	176	410.388	399.286	0.904114		17.4949	176	385.01	373.05	0.931444		17.5005	176	231.977	219.493	0.899946		17.4995	176
17.6274	177	600.605	590.805	0.929339		17.5993	177	330.797	317.968	0.910324		17.5993	177	366.906	353.562	0.90996		17.6023	177	398.378	386.991	0.955439		17.6048	177	473.461	463.81	0.963368		17.5993	177	404.925	393.823	0.891743		17.5948	177	383.453	371.493	0.927556		17.6013	177	250.108	237.624	0.974285		17.5993	177
17.7282	178	612.042	602.242	0.94733		17.6992	178	326.277	313.448	0.897383		17.7002	178	379.027	365.683	0.941156		17.7022	178	403.722	392.335	0.968633		17.7046	178	461.895	452.244	0.939344		17.6992	178	428.415	417.313	0.944933		17.6948	178	388.726	376.766	0.940722		17.7012	178	244.063	231.579	0.9495		17.7002	178
17.828	179	600.967	591.167	0.929908		17.798	179	335.47	322.641	0.923702		17.8	179	370.503	357.159	0.919218		17.802	179	405.669	394.282	0.97344		17.8043	179	484.887	475.236	0.987101		17.8	179	421.619	410.517	0.929544		17.7948	179	385.039	373.079	0.931516		17.801	179	242.419	229.935	0.94276		17.8	179
17.9279	180	610.989	601.189	0.945673		17.8999	180	325.611	312.782	0.895477		17.8999	180	371.445	358.101	0.921642		17.9019	180	393.647	382.26	0.943759		17.905	180	470.341	460.69	0.956887		17.8999	180	438.098	426.996	0.966858		17.8937	180	379.658	367.698	0.918081		17.9009	180	239.328	226.844	0.930086		17.8999	180
18.0277	181	615.755	605.955	0.95317		17.9977	181	326.212	313.383	0.897197		17.9997	181	379.481	366.137	0.942325		18.0017	181	398.707	387.32	0.956251		18.0048	181	460.188	450.537	0.935799		17.9997	181	419.603	408.501	0.924979		17.9957	181	372.051	360.091	0.899087		17.9997	181	239.64	227.156	0.931365		17.9997	181
18.1276	182	612.842	603.042	0.948588		18.0996	182	326.805	313.976	0.898895		18.0996	182	375.252	361.908	0.93144		18.1026	182	403.624	392.237	0.968391		18.1045	182	475.753	466.102	0.968129		18.0996	182	434.529	423.427	0.958777		18.0956	182	386.686	374.726	0.935628		18.1016	182	233.399	220.915	0.905777		18.0996	182
18.2284	183	611.25	601.45	0.946084		18.1994	183	324.458	311.629	0.892176		18.2004	183	367.871	354.527	0.912444		18.2024	183	393.647	382.26	0.943759		18.2052	183	470.357	460.706	0.956921		18.1994	183	420.571	409.469	0.927171		18.1956	183	388.276	376.316	0.939598		18.1994	183	232.317	219.833	0.90134		18.2004	183
18.3283	184	603.167	593.367	0.933369		18.2983	184	338.067	325.238	0.931137		18.3003	184	379.559	366.215	0.942525		18.3023	184	407.847	396.46	0.978817		18.305	184	483.848	474.197	0.984942		18.2993	184	435.753	424.651	0.961548		18.2935	184	386.06	374.1	0.934065		18.3013	184	240.027	227.543	0.932952		18.3003	184
18.4281	185	599.626	589.826	0.927799		18.4001	185	328.84	316.011	0.904721		18.4001	185	375.822	362.478	0.932907		18.4011	185	403.552	392.165	0.968213		18.4047	185	469.964	460.313	0.956104		18.4001	185	434.107	423.005	0.957821		18.3935	185	378.958	366.998	0.916333		18.4011	185	239.84	227.356	0.932185		18.4001	185
18.527	186	590.487	580.687	0.913423		18.498	186	329.417	316.588	0.906373		18.5	186	368.933	355.589	0.915177		18.502	186	406.69	395.303	0.97596		18.5055	186	463.496	453.845	0.94267		18.5	186	422.889	411.787	0.93242		18.4955	186	371.361	359.401	0.897364		18.5	186	228.572	216.088	0.885985		18.5	186
18.6278	187	584.843	575.043	0.904545		18.5998	187	329.399	316.57	0.906321		18.5998	187	377.665	364.321	0.937651		18.6028	187	406.903	395.516	0.976486		18.6052	187	470.751	461.1	0.957739		18.5998	187	424.5	413.398	0.936068		18.5954	187	381.234	369.274	0.922016		18.6018	187	225.03	212.546	0.871463		18.5998	187
18.7287	188	587.584	577.784	0.908857		18.6986	188	338.375	325.546	0.932019		18.6986	188	370.863	357.519	0.920144		18.7026	188	398.455	387.068	0.955629		18.7049	188	489.695	480.044	0.997087		18.6986	188	430.394	419.292	0.949414		18.6954	188	390.042	378.082	0.944008		18.7016	188	235.839	223.355	0.915781		18.7006	188
18.8285	189	611.226	601.426	0.946046		18.7985	189	331.621	318.792	0.912683		18.8005	189	381.338	367.994	0.947104		18.8025	189	405.76	394.373	0.973664		18.8057	189	482.184	472.533	0.981486		18.7995	189	422.55	411.448	0.931652		18.7953	189	373.129	361.169	0.901779		18.8015	189	236.128	223.644	0.916966		18.7985	189
18.9284	190	615.846	606.046	0.953313		18.9003	190	335.485	322.656	0.923745		18.8983	190	388.857	375.513	0.966456		18.9023	190	403.047	391.66	0.966966		18.9054	190	465.726	456.075	0.947302		18.8983	190	424.068	412.966	0.935089		18.8943	190	385.661	373.701	0.933069		18.9013	190	234.845	222.361	0.911705		18.9003	190
19.0282	191	596.651	586.851	0.923119		18.9982	191	333.484	320.655	0.918017		18.9982	191	371.796	358.452	0.922546		19.0022	191	405.635	394.248	0.973356		19.0041	191	464.408	454.757	0.944564		19.0002	191	412.609	401.507	0.909143		18.9952	191	384.046	372.086	0.929037		19.0002	191	233.741	221.257	0.907179		19.0002	191
19.128	192	608.395	598.595	0.941593		19.1	192	339.327	326.498	0.934745		19.1	192	366.96	353.616	0.910099		19.101	192	395.181	383.794	0.947546		19.1049	192	464.111	454.46	0.943947		19.1	192	433.906	422.804	0.957366		19.0942	192	384.796	372.836	0.930909		19.1	192	237.184	224.7	0.921295		19.099	192
19.2289	193	599.251	589.451	0.927209		19.1989	193	338.983	326.154	0.93376		19.1989	193	373.408	360.064	0.926695		19.2029	193	410.821	399.434	0.986159		19.2056	193	459.329	449.678	0.934015		19.1989	193	421.861	410.759	0.930092		19.1942	193	374.531	362.571	0.905279		19.1999	193	244.926	232.442	0.953039		19.1999	193
19.3267	194	598.772	588.972	0.926456		19.2987	194	339.213	326.384	0.934418		19.3007	194	378.627	365.283	0.940127		19.3027	194	411.128	399.741	0.986917		19.3053	194	484.557	474.906	0.986415		19.2997	194	418.925	407.823	0.923444		19.2961	194	401.965	390.005	0.973778		19.3017	194	263.406	250.922	1.02881		19.3007	194
19.4286	195	607.534	597.734	0.940238		19.3986	195	323.583	310.754	0.889671		19.3986	195	381.625	368.281	0.947843		19.4016	195	400.592	389.205	0.960905		19.4041	195	459.127	449.476	0.933595		19.3986	195	418.947	407.845	0.923494		19.3941	195	382.698	370.738	0.925671		19.4016	195	237.171	224.687	0.921242		19.4006	195
19.5274	196	594.282	584.482	0.919393		19.4984	196	332.807	319.978	0.916078		19.4984	196	385.761	372.417	0.958487		19.5024	196	398.265	386.878	0.95516		19.5038	196	461.507	451.856	0.938539		19.4984	196	409.309	398.207	0.90167		19.494	196	376.754	364.794	0.91083		19.5004	196	246.863	234.379	0.96098		19.4984	196
19.6283	197	596.596	586.796	0.923033		19.6003	197	331.581	318.752	0.912568		19.5993	197	380.424	367.08	0.944752		19.6013	197	405.778	394.391	0.973709		19.6056	197	479.83	470.179	0.976597		19.6003	197	406.11	395.008	0.894427		19.594	197	378.833	366.873	0.916021		19.6003	197	250.514	238.03	0.97595		19.5993	197
19.7271	198	612.332	602.532	0.947786		19.6991	198	341.568	328.739	0.941161		19.6991	198	378.243	364.899	0.939138		19.7031	198	402.492	391.105	0.965596		19.7043	198	463.874	454.223	0.943455		19.6991	198	417.442	406.34	0.920086		19.6939	198	379.442	367.482	0.917541		19.7001	198	245.509	233.025	0.955429		19.6991	198
19.827	199	608.662	598.862	0.942013		19.799	199	323.362	310.533	0.889038		19.801	199	370.675	357.331	0.919661		19.803	199	415.761	404.374	0.998356		19.806	199	473.264	463.613	0.962959		19.8	199	413.668	402.566	0.91154		19.7939	199	381.117	369.157	0.921724		19.802	199	244.6	232.116	0.951702		19.799	199
19.9268	200	603.75	593.95	0.934286		19.9008	200	343.866	331.037	0.94774		19.8988	200	372.851	359.507	0.925261		19.9018	200	404.64	393.253	0.970899		19.9038	200	476.383	466.732	0.969437		19.8988	200	418.963	407.861	0.92353		19.8948	200	380.408	368.448	0.919953		19.8998	200	247.848	235.364	0.965019		19.9008	200
[truncated: 17 more columns]

## Sheet: 2J diff
						0	-0.0337396	1.81358	0.58653	0.788653								0.124124	0.146971	0.123934	0.123251		0.352312	0.383368	0.352042	0.351071
No UV	2J 1hUV	2J 3hUV	2J 16hUV	2J 24hUV		0J Delta	1h	3h	16h	24h		Variance NoUV	Variance 1h	Variance 3h	Variance 16h	Variance 24h		Variance 1h	Variance 3h	Variance 16h	Variance 24h
1.0801	1.06746	1.07783	1.06977	1.08089		obviously	-0.0126389	-0.00226995	-0.0103374	0.000787611		0.000942496	0.000461938	0.000507054	0.000372691	0.000182335		0.00140443	0.00144955	0.00131519	0.00112483
1.06943	1.04882	1.04334	1.04696	1.04849		Zero	-0.0206081	-0.0260916	-0.022468	-0.0209379		0.000462038	0.000519705	0.000302839	0.00039397	0.000296806		0.000981743	0.000764877	0.000856008	0.000758844
1.06034	1.04234	1.03531	1.04064	1.04597			-0.0179999	-0.0250276	-0.0197066	-0.0143727		0.000421739	0.00063027	0.00040418	0.000283893	0.000201462		0.00105201	0.000825919	0.000705633	0.000623201
1.02902	1.02439	1.0221	1.03367	1.02808			-0.00462396	-0.00691707	0.00465071	-0.000941162		0.000744352	0.000441766	0.000412756	0.000246555	0.000459984		0.00118612	0.00115711	0.000990907	0.00120434
1.03149	1.02117	1.02733	1.01993	1.01644			-0.0103113	-0.0041597	-0.0115531	-0.0150436		0.000707917	0.000313164	0.000284123	0.000370719	0.000642437		0.00102108	0.00099204	0.00107864	0.00135035
1.02208	1.01531	1.00768	1.02138	1.0174			-0.00676906	-0.0144063	-0.000698082	-0.00468597		0.000503683	0.000143197	0.000139172	0.000661525	0.000451033		0.00064688	0.000642855	0.00116521	0.000954716
1.01957	1.01179	1.01542	1.02019	1.01495			-0.00777639	-0.00414228	0.00062334	-0.00461595		0.000619598	0.000174162	0.000594356	0.000444545	0.000312167		0.000793761	0.00121395	0.00106414	0.000931765
1.01702	0.996399	1.01662	1.00408	1.01018			-0.0206168	-0.00039593	-0.0129408	-0.00683789		0.000583168	0.000298169	0.000633428	0.000407437	0.000397754		0.000881337	0.0012166	0.000990605	0.000980922
1.00342	1.00625	1.00289	0.999564	1.00326			0.00283263	-0.000530514	-0.00385841	-0.000159573		0.000495658	0.000109568	0.000679615	0.000174798	0.00024317		0.000605226	0.00117527	0.000670457	0.000738828
1.00132	1.00927	1.01333	0.997813	1.0016			0.00795229	0.0120088	-0.00350619	0.000285052		0.000324238	0.000283752	0.000276721	0.000285468	0.000759397		0.00060799	0.00060096	0.000609706	0.00108364
1.00203	1.01014	1.01156	1.01757	1.00213			0.00811139	0.0095242	0.0155365	9.24549e-05		0.000453372	0.00030679	0.000173665	0.000416688	0.000553064		0.000760161	0.000627037	0.00087006	0.00100644
1.0148	1.00518	1.00033	1.00193	1.00454			-0.00961489	-0.0144686	-0.012866	-0.0102604		0.000500529	0.000319635	0.000176458	0.000122314	0.000400398		0.000820164	0.000676987	0.000622842	0.000900927
1.00476	0.996973	1.00335	1.00154	1.00976			-0.00778798	-0.00140689	-0.00322029	0.00500317		0.000172439	0.000206835	8.23228e-05	0.000346009	0.000395874		0.000379274	0.000254762	0.000518448	0.000568313
1.00017	1.00819	0.997112	0.992205	1.00024			0.00801932	-0.00306146	-0.00796859	6.78706e-05		0.000297148	0.000531402	0.00039639	0.000156575	0.000274799		0.00082855	0.000693539	0.000453723	0.000571948
1.00827	0.998446	0.997564	1.00315	1.00557			-0.00981925	-0.0107014	-0.00511618	-0.00269212		0.000273501	0.00047556	0.000690984	0.000174247	0.000200837		0.000749062	0.000964485	0.000447748	0.000474338
0.992553	1.00203	1.00544	0.995255	0.998118			0.00947417	0.0128816	0.00270181	0.00556451		0.000492548	0.000278237	0.00018633	0.000304074	0.000700569		0.000770785	0.000678878	0.000796622	0.00119312
0.996518	0.998042	0.996223	0.997916	0.99365			0.00152453	-0.000294591	0.00139871	-0.00286807		0.00068761	0.000143538	0.000167892	0.000205626	0.00020239		0.000831147	0.000855501	0.000893235	0.000889999
0.993593	0.99146	1.00018	0.992534	0.995628			-0.00213346	0.00658347	-0.0010593	0.00203453		0.000217659	0.000290727	0.000400486	0.000179462	0.000273263		0.000508386	0.000618145	0.000397121	0.000490922
0.995779	0.997128	1.0061	0.992658	0.998608			0.00134896	0.0103169	-0.00312048	0.00282907		0.000136623	0.000249601	0.000329849	0.000279767	0.000208782		0.000386224	0.000466472	0.000416389	0.000345405
0.991527	0.992404	0.982154	1.00524	0.991756			0.000877216	-0.00937322	0.0137138	0.000228994		0.000163385	0.000113845	0.00035375	0.000113263	0.00063514		0.00027723	0.000517135	0.000276648	0.000798525
0.685121	0.678019	0.682172	0.693006	0.673035			-0.00710167	-0.0029493	0.0078854	-0.0120862		0.00145691	0.000705121	0.00117553	0.000199402	0.000251925		0.00216204	0.00263244	0.00165632	0.00170884
0.73523	0.733426	0.755573	0.740481	0.735281			-0.00180483	0.020343	0.00525019	5.04142e-05		0.00106949	0.000689433	0.000119913	0.0002576	0.000622403		0.00175893	0.00118941	0.00132709	0.0016919
0.768818	0.762966	0.793594	0.788696	0.772465			-0.00585226	0.0247753	0.0198774	0.00364657		0.00113127	0.000345341	0.000303084	0.000686477	0.000760993		0.00147661	0.00143435	0.00181775	0.00189226
0.786348	0.781358	0.81998	0.810832	0.805551			-0.00498947	0.0336326	0.0244842	0.019204		0.0011007	0.000512806	0.000653029	0.000402253	0.000296918		0.00161351	0.00175373	0.00150295	0.00139762
0.807365	0.802378	0.84333	0.825338	0.817411			-0.00498658	0.0359651	0.0179734	0.010046		0.000813888	0.000273019	0.000278241	0.000731197	0.000485979		0.00108691	0.00109213	0.00154508	0.00129987
0.818774	0.81349	0.858062	0.843495	0.833098			-0.00528336	0.0392885	0.0247214	0.0143239		0.000960861	0.000325007	0.000625474	0.000778921	0.000438276		0.00128587	0.00158634	0.00173978	0.00139914
0.829126	0.834556	0.85367	0.842737	0.844607			0.00542962	0.0245442	0.0136108	0.0154811		0.000464422	0.000883526	0.000669892	0.000575727	0.000451806		0.00134795	0.00113431	0.00104015	0.000916228
0.837746	0.835936	0.866923	0.853862	0.860791			-0.0018091	0.0291774	0.0161164	0.0230457		0.000640555	0.00144884	0.000554624	0.000282206	0.000749447		0.0020894	0.00119518	0.000922761	0.00139
0.851006	0.843391	0.877793	0.853038	0.861747			-0.0076149	0.0267872	0.00203255	0.0107418		0.000384315	0.000522133	0.0010335	0.000454465	0.000396306		0.000906447	0.00141781	0.00083878	0.00078062
0.849328	0.847291	0.883839	0.863366	0.861902			-0.00203663	0.0345116	0.0140385	0.0125741		0.000760494	0.000273212	0.000390877	0.000939754	0.000650924		0.00103371	0.00115137	0.00170025	0.00141142
0.85159	0.854788	0.88791	0.872093	0.858861			0.00319846	0.0363203	0.0205033	0.00727128		0.000650519	0.000167876	0.000851955	0.000598786	0.00124734		0.000818395	0.00150247	0.00124931	0.00189786
0.873753	0.860911	0.884504	0.869132	0.868763			-0.0128418	0.0107511	-0.00462041	-0.00499008		0.000470502	0.000508633	0.000340876	0.00122192	0.00049561		0.000979135	0.000811378	0.00169243	0.000966111
0.870994	0.86988	0.888176	0.87496	0.879414			-0.00111436	0.0171821	0.00396569	0.00841918		0.000428541	0.000330582	0.000842689	0.000831414	0.000305826		0.000759123	0.00127123	0.00125995	0.000734367
0.872206	0.880157	0.899521	0.879039	0.884308			0.00795063	0.0273149	0.00683321	0.0121021		0.00127324	0.00063329	0.000818074	0.000657	0.000377493		0.00190653	0.00209131	0.00193024	0.00165073
0.877388	0.865567	0.895426	0.882663	0.880846			-0.0118214	0.0180378	0.00527526	0.0034574		0.000604579	0.000598538	0.000527832	0.000457151	0.000467742		0.00120312	0.00113241	0.00106173	0.00107232
0.870111	0.873052	0.895001	0.879706	0.893644			0.00294104	0.0248894	0.00959509	0.023533		0.000663985	0.000180761	0.000548057	0.000447063	0.00100844		0.000844747	0.00121204	0.00111105	0.00167242
0.880666	0.882701	0.905546	0.892365	0.890449			0.00203436	0.0248799	0.0116993	0.00978252		0.0003076	0.000224456	0.000552243	0.000462013	0.000600519		0.000532056	0.000859843	0.000769613	0.000908119
0.878173	0.883471	0.906371	0.890827	0.893593			0.00529878	0.0281979	0.012654	0.0154207		0.000680469	0.000330455	0.000879263	0.00106573	0.000737081		0.00101092	0.00155973	0.0017462	0.00141755
0.885401	0.879448	0.903237	0.894111	0.893447			-0.00595254	0.0178358	0.00871019	0.00804647		0.000840635	0.000186568	0.000424061	0.000592497	0.000752909		0.0010272	0.0012647	0.00143313	0.00159354
0.882619	0.89157	0.911244	0.89956	0.898243			0.00895168	0.0286253	0.0169415	0.0156247		0.000389	0.000293351	0.000478774	0.000698341	0.000621995		0.00068235	0.000867773	0.00108734	0.00101099
0.891065	0.885956	0.913756	0.903721	0.901043			-0.00510855	0.0226913	0.0126566	0.00997852		0.000831254	0.000287323	0.000839104	0.000685082	0.000552889		0.00111858	0.00167036	0.00151634	0.00138414
0.885568	0.894498	0.898113	0.902856	0.895498			0.00892987	0.0125448	0.0172885	0.00992982		0.00136526	0.000596383	0.000522406	0.000625048	0.000488496		0.00196165	0.00188767	0.00199031	0.00185376
0.895305	0.878872	0.909135	0.902003	0.901568			-0.0164328	0.0138303	0.00669801	0.0062629		0.000639386	0.000420178	0.000277545	0.00073304	0.000528585		0.00105956	0.000916931	0.00137243	0.00116797
0.897687	0.890243	0.92455	0.898148	0.904413			-0.00744468	0.0268623	0.000460383	0.00672537		0.00089661	0.000278265	0.000573101	0.000616818	7.97638e-05		0.00117488	0.00146971	0.00151343	0.000976374
0.888635	0.884714	0.910595	0.894954	0.899325			-0.00392128	0.0219598	0.00631873	0.0106896		0.00102067	0.000142851	0.000645388	0.000390358	0.000526812		0.00116352	0.00166606	0.00141103	0.00154748
0.890389	0.893177	0.913833	0.896184	0.914762			0.00278769	0.0234434	0.0057944	0.0243726		0.00121824	0.000961627	0.000737002	0.000474383	0.000348638		0.00217986	0.00195524	0.00169262	0.00156687
0.901637	0.895952	0.919109	0.90076	0.907695			-0.00568516	0.0174724	-0.000876897	0.00605867		0.00023905	0.000478936	0.00107152	0.000585463	0.00051364		0.000717987	0.00131057	0.000824513	0.000752691
0.905106	0.893481	0.922182	0.896717	0.910524			-0.0116249	0.0170762	-0.00838911	0.00541807		0.000523884	0.000396289	0.000225759	0.000653555	0.00060877		0.000920172	0.000749642	0.00117744	0.00113265
0.90604	0.889031	0.914796	0.900431	0.903767			-0.017009	0.00875628	-0.00560829	-0.00227269		0.000848124	0.000346342	0.000387377	0.000361032	0.000539383		0.00119447	0.0012355	0.00120916	0.00138751
0.898612	0.907888	0.918975	0.906698	0.911645			0.00927681	0.0203629	0.00808599	0.0130335		0.000284384	0.000679766	0.000232088	0.00113277	0.000476549		0.00096415	0.000516472	0.00141715	0.000760933
0.897543	0.904596	0.915707	0.904874	0.910703			0.00705264	0.0181643	0.00733118	0.0131603		0.000602107	0.000444994	0.000355403	0.000979375	0.000560889		0.0010471	0.000957511	0.00158148	0.001163
0.905147	0.90706	0.924434	0.910485	0.911926			0.00191223	0.0192864	0.00533713	0.00677903		0.000424352	0.000436098	0.000652685	0.000826722	0.000423637		0.000860449	0.00107704	0.00125107	0.000847989
0.909555	0.9062	0.934003	0.908733	0.918032			-0.00335545	0.0244477	-0.000822049	0.0084767		0.000383976	0.000516093	0.000586374	0.00022886	0.000394749		0.000900069	0.00097035	0.000612836	0.000778725
0.899242	0.913027	0.922123	0.911771	0.906861			0.0137849	0.0228814	0.0125291	0.00761913		0.000684942	0.000654292	0.000329731	0.000234167	0.000893386		0.00133923	0.00101467	0.000919108	0.00157833
0.900881	0.910139	0.92786	0.900299	0.916691			0.00925781	0.0269794	-0.000581914	0.0158097		0.00055359	0.000328235	0.000447576	0.000364369	0.000375878		0.000881825	0.00100117	0.000917959	0.000929468
0.89321	0.903782	0.919259	0.908007	0.910663			0.0105719	0.0260488	0.0147976	0.0174531		0.000708783	0.000380015	0.000606181	0.000162925	0.000438327		0.0010888	0.00131496	0.000871707	0.00114711
0.907505	0.90514	0.925151	0.905461	0.908232			-0.00236502	0.0176459	-0.00204376	0.000727292		0.000967004	0.000314103	0.000651993	0.000477239	0.000524722		0.00128111	0.001619	0.00144424	0.00149173
0.915181	0.908392	0.928953	0.903949	0.922585			-0.00678904	0.0137716	-0.011232	0.00740396		0.000381987	0.00014529	0.00029461	0.000454372	0.000507144		0.000527277	0.000676596	0.000836359	0.000889131
0.917645	0.914988	0.9229	0.902268	0.905638			-0.00265702	0.00525517	-0.0153768	-0.0120069		0.00106944	0.000335782	0.000448391	0.000212395	0.000253854		0.00140522	0.00151783	0.00128184	0.00132329
0.905518	0.910723	0.920047	0.907357	0.921147			0.00520497	0.0145291	0.00183901	0.0156294		0.000313302	0.000332682	0.000678421	0.000894873	0.00040893		0.000645984	0.000991723	0.00120818	0.000722232
0.906157	0.910438	0.930903	0.901354	0.915556			0.00428118	0.0247464	-0.00480283	0.0093988		0.000926465	0.000266572	0.00071212	0.000264951	0.00044601		0.00119304	0.00163858	0.00119142	0.00137247
0.901484	0.909628	0.920095	0.918393	0.91409			0.00814389	0.0186105	0.0169093	0.0126057		0.000556701	0.000253402	0.000963038	0.000212248	0.000339185		0.000810103	0.00151974	0.000768949	0.000895885
0.912947	0.919235	0.928575	0.903235	0.920588			0.00628842	0.0156284	-0.00971239	0.00764075		0.00114538	0.000584003	0.000880246	0.000372545	0.000400911		0.00172938	0.00202563	0.00151793	0.00154629
0.90839	0.908328	0.920486	0.913653	0.917247			-6.19182e-05	0.0120958	0.00526325	0.00885724		0.000584409	0.000444748	0.000933628	0.00065303	0.000400613		0.00102916	0.00151804	0.00123744	0.000985022
0.908711	0.912127	0.923759	0.908371	0.916996			0.00341657	0.0150482	-0.000340309	0.0082847		0.000628867	0.000188291	0.00052371	0.000684529	0.000753453		0.000817157	0.00115258	0.0013134	0.00138232
0.897669	0.903793	0.927998	0.914759	0.91891			0.00612406	0.0303292	0.01709	0.0212411		0.000608955	0.000400666	0.000381299	0.000849517	0.000272484		0.00100962	0.000990253	0.00145847	0.000881438
0.898387	0.907946	0.937538	0.912065	0.915549			0.00955951	0.0391511	0.0136781	0.0171622		0.000399985	0.000629871	0.00105358	0.000714732	0.000525746		0.00102986	0.00145356	0.00111472	0.000925731
0.905	0.905609	0.936482	0.917853	0.922477			0.000609343	0.0314826	0.0128531	0.0174775		0.000451865	0.000207896	0.00104402	0.000821209	0.000334644		0.000659762	0.00149588	0.00127307	0.000786509
0.900148	0.905135	0.92504	0.916985	0.921732			0.00498734	0.0248919	0.0168376	0.021584		0.000768085	0.000529258	0.000226545	0.000662607	0.000490106		0.00129734	0.00099463	0.00143069	0.00125819
0.90068	0.910988	0.933059	0.921188	0.920003			0.010308	0.0323788	0.0205074	0.0193223		0.000643891	0.0012005	0.000981779	0.000650558	0.00059204		0.00184439	0.00162567	0.00129445	0.00123593
0.90385	0.909481	0.936306	0.909825	0.919348			0.00563111	0.0324561	0.00597439	0.0154982		0.00127165	0.000609145	0.000622045	0.000630646	0.000290284		0.00188079	0.00189369	0.00190229	0.00156193
0.920664	0.904834	0.93852	0.911234	0.913268			-0.01583	0.0178562	-0.00942985	-0.00739575		0.000807114	0.00078303	0.000853755	0.00048856	0.000172786		0.00159014	0.00166087	0.00129567	0.0009799
0.905874	0.914279	0.929225	0.91848	0.917437			0.00840556	0.0233515	0.0126064	0.0115635		0.000455023	0.000207231	0.000988898	0.000755015	0.000474942		0.000662254	0.00144392	0.00121004	0.000929965
0.916594	0.909327	0.933859	0.91303	0.925091			-0.00726755	0.0172644	-0.00356404	0.00849609		0.000595898	0.000391879	0.00065529	0.000300103	0.00037422		0.000987777	0.00125119	0.000896001	0.000970118
0.921076	0.918577	0.931049	0.919485	0.932494			-0.00249944	0.00997302	-0.00159122	0.0114177		0.000552021	0.000834137	0.00035378	0.0001817	0.000210986		0.00138616	0.000905801	0.000733722	0.000763007
0.903155	0.910823	0.92549	0.920671	0.929388			0.00766793	0.0223351	0.0175164	0.0262328		0.000878451	0.000228893	0.000666452	0.000689084	0.000306242		0.00110734	0.0015449	0.00156754	0.00118469
0.912497	0.907019	0.929823	0.920487	0.920579			-0.00547805	0.0173258	0.00799027	0.00808208		0.00108221	0.000630826	0.000499372	0.000496536	0.000535406		0.00171303	0.00158158	0.00157874	0.00161761
0.912695	0.915246	0.927855	0.904546	0.927229			0.00255092	0.0151607	-0.00814888	0.0145345		0.000854225	0.000987034	0.00114133	0.000427218	0.000748562		0.00184126	0.00199555	0.00128144	0.00160279
0.918593	0.916204	0.932622	0.923612	0.922017			-0.00238892	0.0140291	0.00501919	0.00342429		0.000395411	0.000828881	0.000651185	0.000293221	9.95973e-05		0.00122429	0.0010466	0.000688632	0.000495008
0.913916	0.911578	0.933542	0.909763	0.917717			-0.00233807	0.0196264	-0.00415229	0.00380082		0.000808326	0.000488736	0.00117274	0.0003132	0.000312987		0.00129706	0.00198107	0.00112153	0.00112131
0.913611	0.908372	0.930642	0.918303	0.933098			-0.00523848	0.0170315	0.00469192	0.0194871		0.000585483	0.000158669	0.000936485	0.000308669	0.000470692		0.000744153	0.00152197	0.000894153	0.00105618
0.916638	0.911858	0.931611	0.928348	0.923017			-0.00478047	0.0149727	0.0117101	0.00637843		0.000505578	0.000764007	0.000490395	0.000422639	0.000544598		0.00126958	0.000995972	0.000928216	0.00105018
0.917903	0.916927	0.927493	0.920493	0.921239			-0.00097605	0.00958992	0.00259014	0.00333586		0.000346068	0.00030564	0.000967945	0.000317292	0.00103951		0.000651709	0.00131401	0.00066336	0.00138558
0.916488	0.915404	0.923282	0.912066	0.923038			-0.00108399	0.00679402	-0.00442249	0.00654979		0.000765274	0.001021	0.000875995	0.000331418	0.000544799		0.00178628	0.00164127	0.00109669	0.00131007
0.922427	0.911442	0.930127	0.920483	0.922749			-0.0109855	0.00769977	-0.00194443	0.00032129		0.00105374	0.000341612	0.000709892	0.00027776	0.000813028		0.00139535	0.00176363	0.0013315	0.00186677
0.9151	0.908864	0.930045	0.919547	0.923972			-0.00623615	0.0149455	0.00444756	0.00887204		0.000668773	0.000557979	0.000740083	0.000310313	0.000444312		0.00122675	0.00140886	0.000979086	0.00111308
0.914608	0.909108	0.927454	0.921379	0.919634			-0.00550005	0.0128455	0.00677127	0.0050262		0.000828617	0.000507672	0.000288217	0.000120665	0.000665045		0.00133629	0.00111683	0.000949283	0.00149366
0.908632	0.920637	0.931792	0.922245	0.932146			0.0120057	0.0231609	0.0136136	0.0235144		0.000946986	0.000372015	0.00107682	0.00012913	0.00113299		0.001319	0.0020238	0.00107612	0.00207998
0.913718	0.922352	0.938408	0.92143	0.931723			0.00863388	0.0246895	0.00771209	0.0180046		0.000458407	0.000229504	0.000912367	0.000302839	0.000723131		0.000687911	0.00137077	0.000761246	0.00118154
0.913558	0.917109	0.937576	0.925961	0.926315			0.00355104	0.0240175	0.0124032	0.0127567		0.00118291	0.000414301	0.000509979	0.000336114	0.000450355		0.00159721	0.00169289	0.00151902	0.00163326
0.922898	0.926481	0.935593	0.923126	0.925173			0.00358313	0.0126949	0.000227172	0.00227491		0.000610509	0.000606855	0.000663006	0.000215786	0.000187485		0.00121736	0.00127352	0.000826295	0.000797994
0.919826	0.917229	0.935828	0.917854	0.928023			-0.00259654	0.0160027	-0.00197141	0.00819714		0.000849268	0.000175737	0.000880915	0.000512258	0.000418518		0.001025	0.00173018	0.00136153	0.00126779
0.919721	0.928236	0.933459	0.925195	0.924153			0.00851544	0.013738	0.00547364	0.00443159		0.00138436	0.000297469	0.00095696	0.000204264	0.000584333		0.00168183	0.00234132	0.00158862	0.00196869
0.92505	0.912067	0.93802	0.939529	0.924787			-0.0129823	0.0129701	0.0144798	-0.000262721		0.000326994	0.000630995	0.00128149	0.000307348	0.000653201		0.000957989	0.00160848	0.000634342	0.000980195
0.927542	0.923972	0.940277	0.931177	0.921385			-0.00357051	0.0127341	0.00363497	-0.00615702		0.00104607	0.000389296	0.00137084	0.000375989	0.00088066		0.00143536	0.0024169	0.00142205	0.00192673
0.921225	0.912285	0.940026	0.919078	0.926205			-0.0089393	0.0188016	-0.00214676	0.00497997		0.000511009	0.000786649	0.00066833	0.000368334	0.000559292		0.00129766	0.00117934	0.000879343	0.0010703
0.933225	0.92708	0.94107	0.928146	0.927623			-0.00614492	0.00784487	-0.00507905	-0.00560202		0.000724888	0.00027227	0.000990233	0.000944935	0.000704362		0.000997158	0.00171512	0.00166982	0.00142925
0.920917	0.916247	0.931438	0.9192	0.928204			-0.00467004	0.0105216	-0.00171657	0.00728698		0.00125326	0.00038032	0.000939226	0.000382669	0.000317159		0.00163358	0.00219249	0.00163593	0.00157042
0.912701	0.926658	0.937596	0.924962	0.932378			0.013957	0.024895	0.0122608	0.0196772		0.000748913	0.000469383	0.000756801	0.000313839	0.00044951		0.0012183	0.00150571	0.00106275	0.00119842
0.917575	0.936822	0.945489	0.922353	0.924691			0.019247	0.027914	0.00477757	0.00711611		0.000636573	0.00066883	0.000813245	0.000337531	0.000236903		0.0013054	0.00144982	0.000974104	0.000873476
0.917023	0.919121	0.939812	0.917644	0.922437			0.0020979	0.0227888	0.000620517	0.00541382		0.00033796	0.000862028	0.00095566	0.000282979	0.000336998		0.00119999	0.00129362	0.000620939	0.000674958
0.926174	0.919483	0.936115	0.929617	0.923611			-0.00669124	0.00994114	0.00344241	-0.00256283		0.00056471	0.000377742	0.00061911	0.000471556	0.000195784		0.000942452	0.00118382	0.00103627	0.000760494
0.919858	0.919792	0.939548	0.927403	0.93332			-6.66796e-05	0.0196894	0.00754485	0.0134617		0.000485624	0.000486199	0.000911243	0.000304277	0.000523421		0.000971823	0.00139687	0.0007899	0.00100904
0.919095	0.927804	0.925389	0.929028	0.926759			0.0087089	0.00629392	0.00993335	0.00766383		0.000891231	0.000761942	0.000448133	0.000420901	0.000278869		0.00165317	0.00133936	0.00131213	0.0011701
0.928093	0.921858	0.935316	0.925804	0.917778			-0.00623502	0.00722211	-0.00228948	-0.0103154		0.00130091	0.000455553	0.00082739	0.00125115	0.000456719		0.00175647	0.0021283	0.00255206	0.00175763
0.932029	0.923884	0.919941	0.934353	0.925803			-0.0081448	-0.0120883	0.00232422	-0.00622624		0.00102283	0.000496882	0.00141717	0.000432448	0.000359029		0.00151972	0.00244001	0.00145528	0.00138186
0.923127	0.922895	0.923345	0.928074	0.919441			-0.000231606	0.000218263	0.00494704	-0.00368591		0.000643588	0.00113291	0.00100346	0.000154489	0.000492763		0.0017765	0.00164705	0.000798077	0.00113635
0.917363	0.920942	0.925967	0.925191	0.9197			0.00357941	0.00860452	0.00782877	0.00233759		0.000204058	0.000506061	0.00124549	0.000394083	0.000211508		0.000710119	0.00144954	0.000598141	0.000415566
0.922378	0.919685	0.921416	0.919978	0.926315			-0.00269298	-0.000962388	-0.00240057	0.003937		0.000644476	0.000321229	0.000869732	0.000225041	0.000418043		0.000965705	0.00151421	0.000869518	0.00106252
0.922944	0.921814	0.936619	0.930422	0.927178			-0.00112987	0.0136749	0.00747805	0.00423401		0.000189561	0.00056311	0.000740865	0.000140622	0.000201964		0.000752671	0.000930426	0.000330184	0.000391525
0.92311	0.92083	0.939186	0.928228	0.920893			-0.00227969	0.0160762	0.00511843	-0.002217		0.000914934	0.000985021	0.00111507	0.000529966	0.000363831		0.00189995	0.00203	0.0014449	0.00127876
0.926562	0.918869	0.931681	0.924045	0.932456			-0.00769259	0.00511947	-0.00251654	0.00589427		0.000648179	0.000310273	0.00113533	0.000470118	0.000336213		0.000958452	0.00178351	0.0011183	0.000984393
0.920659	0.918101	0.937865	0.934282	0.925456			-0.00255839	0.0172056	0.0136229	0.00479648		0.00154861	0.00039771	0.00111729	0.000661997	0.00058628		0.00194632	0.0026659	0.00221061	0.00213489
0.922871	0.924185	0.929763	0.920114	0.921847			0.00131415	0.00689272	-0.00275655	-0.00102378		0.00093707	0.000738214	0.00104601	0.000505867	0.000365284		0.00167528	0.00198308	0.00144294	0.00130235
0.926799	0.927651	0.93783	0.93221	0.927729			0.000852394	0.0110309	0.00541108	0.000930413		0.000796636	0.00102772	0.000713371	0.000572845	0.000780246		0.00182436	0.00151001	0.00136948	0.00157688
0.932734	0.921457	0.943227	0.934326	0.930301			-0.0112766	0.0104932	0.00159227	-0.00243205		0.000403935	0.000390944	0.000681548	0.000379688	0.000342085		0.000794879	0.00108548	0.000783623	0.00074602
0.922357	0.92979	0.934695	0.936571	0.926945			0.00743243	0.0123382	0.0142141	0.00458788		0.00098259	0.00109625	0.000691656	0.000467138	0.000475378		0.00207884	0.00167425	0.00144973	0.00145797
0.919091	0.927903	0.940583	0.932426	0.927087			0.00881189	0.0214913	0.0133347	0.00799565		0.000433442	0.000447687	0.000659135	0.000239776	0.000606307		0.000881129	0.00109258	0.000673217	0.00103975
0.930864	0.920657	0.933876	0.922076	0.924153			-0.0102074	0.00301137	-0.00878861	-0.00671137		0.000344826	0.000297014	0.000839528	0.000694002	0.000475765		0.00064184	0.00118435	0.00103883	0.000820591
0.928314	0.933166	0.924974	0.935323	0.933061			0.00485199	-0.0033397	0.00700893	0.00474697		0.000413627	0.000391025	0.000850983	0.000306218	0.000511353		0.000804651	0.00126461	0.000719845	0.00092498
0.922155	0.923093	0.938312	0.933245	0.927623			0.00093804	0.0161576	0.0110902	0.00546805		0.000966394	0.00055226	0.000746139	0.000742529	0.000295108		0.00151865	0.00171253	0.00170892	0.0012615
0.920367	0.924392	0.93952	0.927832	0.930736			0.00402409	0.0191526	0.00746416	0.0103684		0.000796317	0.000605761	0.00126395	0.000393691	0.000567145		0.00140208	0.00206026	0.00119001	0.00136346
0.918497	0.924261	0.931484	0.933087	0.925186			0.00576372	0.0129861	0.0145895	0.00668871		0.000682494	0.000320246	0.00136497	0.000269122	0.000404832		0.00100274	0.00204746	0.000951616	0.00108733
0.922812	0.920729	0.937919	0.927639	0.930527			-0.00208276	0.0151065	0.0048267	0.00771446		0.00078184	0.00070648	0.00079139	0.000198915	0.000243916		0.00148832	0.00157323	0.000980755	0.00102576
0.930491	0.93312	0.928831	0.936296	0.939895			0.0026292	-0.00165981	0.0058055	0.00940424		0.000472123	0.000615133	0.000740858	0.000381404	0.000805624		0.00108726	0.00121298	0.000853527	0.00127775
0.927109	0.917462	0.93642	0.932143	0.925705			-0.00964696	0.00931063	0.00503434	-0.00140449		0.000652906	0.00041572	0.00154387	0.000292798	0.000280917		0.00106863	0.00219677	0.000945703	0.000933823
0.931472	0.933577	0.937345	0.933205	0.926905			0.00210535	0.00587304	0.0017334	-0.00456723		0.000909418	0.000567492	0.00121576	0.000539176	0.000425877		0.00147691	0.00212517	0.00144859	0.00133529
0.931731	0.920729	0.93327	0.938474	0.928655			-0.0110024	0.00153833	0.00674244	-0.00307608		0.000310915	0.000378899	0.00145003	0.000584098	0.000242611		0.000689814	0.00176094	0.000895012	0.000553526
0.923987	0.917281	0.926684	0.929507	0.931708			-0.0067066	0.00269665	0.00551958	0.00772121		0.00033458	0.000393266	0.00112357	0.000365207	0.000400951		0.000727845	0.00145815	0.000699787	0.00073553
0.922585	0.927619	0.92789	0.924167	0.933544			0.00503412	0.00530484	0.00158192	0.0109591		0.000477767	0.000397318	0.00156009	0.00070899	0.000352605		0.000875085	0.00203786	0.00118676	0.000830372
0.927382	0.92048	0.932606	0.932386	0.931577			-0.00690239	0.00522398	0.00500341	0.00419501		0.000711557	0.000639535	0.00100826	0.000780798	0.000382377		0.00135109	0.00171981	0.00149236	0.00109393
0.923654	0.919934	0.933604	0.931884	0.929238			-0.00371983	0.00995006	0.00822978	0.00558446		0.000974094	0.000828811	0.000802995	0.000309734	0.000275587		0.0018029	0.00177709	0.00128383	0.00124968
0.926562	0.922433	0.935236	0.937214	0.933294			-0.00412904	0.0086743	0.0106521	0.00673215		0.000772636	0.00126851	0.00184457	0.000398095	0.000416031		0.00204114	0.00261721	0.00117073	0.00118867
0.926921	0.925873	0.919852	0.936075	0.930693			-0.00104848	-0.00706932	0.00915367	0.0037718		0.000510909	0.000996164	0.00102518	0.000725303	0.000518021		0.00150707	0.00153608	0.00123621	0.00102893
0.93607	0.920074	0.928067	0.939453	0.937211			-0.0159963	-0.00800365	0.00338307	0.00114112		0.00122079	0.000808205	0.00185101	0.000291631	0.000214785		0.00202899	0.0030718	0.00151242	0.00143557
0.928852	0.922296	0.917651	0.942644	0.933898			-0.00655615	-0.0112014	0.0137915	0.00504648		0.00122476	0.00084812	0.00119159	0.000326902	0.000320762		0.00207288	0.00241634	0.00155166	0.00154552
0.917863	0.922248	0.924645	0.935775	0.932802			0.00438461	0.00678156	0.0179113	0.0149391		0.000954036	0.000969233	0.00168255	0.000407323	0.000384789		0.00192327	0.00263658	0.00136136	0.00133883
0.921356	0.926171	0.929746	0.933644	0.930784			0.00481542	0.00838993	0.0122879	0.00942828		0.000882431	0.000481311	0.00192313	0.000779299	0.000689044		0.00136374	0.00280556	0.00166173	0.00157148
0.935506	0.941208	0.925838	0.942194	0.92946			0.005702	-0.00966838	0.00668788	-0.00604637		0.000600764	0.000854847	0.00242742	0.000504898	0.000744158		0.00145561	0.00302818	0.00110566	0.00134492
0.922454	0.917729	0.932252	0.932341	0.924757			-0.00472522	0.0097986	0.00988721	0.00230303		0.000919512	0.000200845	0.00199966	0.000495785	0.000316238		0.00112036	0.00291917	0.0014153	0.00123575
0.929272	0.917867	0.933629	0.93851	0.931351			-0.011405	0.00435736	0.0092382	0.00207932		0.000499153	0.000839164	0.00164355	0.000294214	0.000685407		0.00133832	0.0021427	0.000793367	0.00118456
0.933353	0.924018	0.934945	0.931128	0.931437			-0.0093355	0.00159202	-0.00222586	-0.00191591		0.000315553	0.00198668	0.00228424	0.000392063	0.000409388		0.00230224	0.0025998	0.000707616	0.000724941
0.924288	0.929894	0.933332	0.929899	0.931939			0.00560559	0.00904358	0.00561087	0.00765064		0.000854358	0.000673825	0.00211215	0.000551607	0.00104372		0.00152818	0.00296651	0.00140596	0.00189808
0.917556	0.92146	0.928748	0.93669	0.932426			0.0039032	0.0111919	0.0191335	0.0148694		0.000723506	0.000864678	0.002756	0.000359158	0.000514798		0.00158818	0.00347951	0.00108266	0.0012383
0.932522	0.918629	0.93214	0.935044	0.941323			-0.0138923	-0.000381623	0.0025219	0.00880182		0.00110835	0.000720132	0.00295321	0.000527034	0.000578738		0.00182848	0.00406156	0.00163538	0.00168709
0.930051	0.928011	0.936294	0.928725	0.935174			-0.00204009	0.0062432	-0.00132596	0.00512246		0.000449742	0.000444485	0.00279966	0.000506399	0.000462488		0.000894228	0.0032494	0.000956141	0.00091223
0.925137	0.926458	0.922423	0.935341	0.927481			0.00132034	-0.00271408	0.0102037	0.00234331		0.000872741	0.000544859	0.00111277	0.000254967	0.000405483		0.0014176	0.00198552	0.00112771	0.00127822
0.929949	0.920013	0.931884	0.928252	0.926845			-0.00993593	0.00193481	-0.00169679	-0.00310471		0.000851642	0.0010404	0.00212668	0.000224568	0.000125327		0.00189205	0.00297832	0.00107621	0.000976969
0.932382	0.917355	0.923973	0.92818	0.932086			-0.0150267	-0.00840855	-0.00420164	-0.000295603		0.000759208	0.000480925	0.00140941	0.000428374	0.00036215		0.00124013	0.00216862	0.00118758	0.00112136
0.914315	0.921318	0.933156	0.934887	0.929547			0.00700262	0.0188408	0.0205715	0.0152318		0.00125244	0.000899847	0.00345483	0.000184685	0.000571962		0.00215228	0.00470727	0.00143712	0.0018244
0.923531	0.914554	0.934519	0.936452	0.925818			-0.00897629	0.0109887	0.012921	0.00228717		0.00158519	0.000883912	0.00196895	0.000353579	0.000313185		0.0024691	0.00355414	0.00193877	0.00189838
0.926963	0.921642	0.938844	0.940336	0.933463			-0.00532086	0.011881	0.0133727	0.00649968		0.00135852	0.000623749	0.00123976	0.000389889	0.000501729		0.00198227	0.00259828	0.00174841	0.00186025
0.924108	0.920179	0.935657	0.929469	0.931406			-0.00392904	0.0115496	0.00536178	0.00729867		0.000610907	0.0009023	0.00149958	0.000408231	0.000510096		0.00151321	0.00211048	0.00101914	0.001121
0.937657	0.931061	0.931082	0.93201	0.931975			-0.00659553	-0.00657455	-0.0056464	-0.00568197		0.00136882	0.00177837	0.00158957	0.000577602	0.000476855		0.00314719	0.00295839	0.00194642	0.00184568
0.936162	0.917895	0.935556	0.926413	0.93569			-0.0182668	-0.00060617	-0.00974935	-0.000471939		0.000981052	0.000594773	0.00209923	0.000775063	0.000350324		0.00157582	0.00308028	0.00175611	0.00133138
0.917525	0.920608	0.929023	0.941726	0.929543			0.00308354	0.0114986	0.0242008	0.0120187		0.00143891	0.0005485	0.00242533	0.000559932	0.000434585		0.00198741	0.00386424	0.00199884	0.00187349
0.917228	0.927806	0.927033	0.929383	0.920847			0.0105783	0.00980544	0.0121557	0.00361915		0.00199699	0.000887773	0.00195893	0.000687508	0.000573092		0.00288476	0.00395591	0.00268449	0.00257008
0.918996	0.923029	0.923764	0.930331	0.930639			0.00403291	0.0047673	0.011335	0.011643		0.000378732	0.000759513	0.00194191	0.000238483	0.000715322		0.00113825	0.00232064	0.000617215	0.00109405
0.92572	0.918934	0.926719	0.935441	0.923001			-0.00678632	0.000999469	0.0097208	-0.0027184		0.00115728	0.000952942	0.00332069	0.000466242	0.000375391		0.00211022	0.00447797	0.00162352	0.00153267
0.914486	0.925276	0.944288	0.939467	0.924633			0.0107901	0.0298019	0.0249816	0.0101475		0.000856353	0.00142609	0.00111777	0.000385214	0.000333599		0.00228244	0.00197412	0.00124157	0.00118995
0.930922	0.91656	0.926348	0.939415	0.929733			-0.0143614	-0.0045743	0.008493	-0.00118899		0.000947464	0.000992647	0.00271112	0.000831685	0.000704888		0.00194011	0.00365858	0.00177915	0.00165235
0.92642	0.925948	0.928617	0.938753	0.939972			-0.000471933	0.00219709	0.0123325	0.0135518		0.000780209	0.00107492	0.0018091	0.000830047	0.000459383		0.00185513	0.0025893	0.00161026	0.00123959
0.925643	0.916215	0.926432	0.937803	0.932278			-0.00942726	0.000789337	0.0121605	0.00663574		0.0010478	0.000807623	0.00232045	0.000886524	0.000357214		0.00185542	0.00336825	0.00193432	0.00140501
0.935275	0.92344	0.929746	0.935927	0.941989			-0.0118346	-0.00552901	0.000651455	0.00671377		0.00137337	0.00105966	0.00205256	0.000809144	0.000318822		0.00243303	0.00342593	0.00218252	0.0016922
0.920998	0.919815	0.925604	0.929358	0.936524			-0.00118213	0.00460685	0.00836038	0.0155268		0.000600503	0.000654435	0.00229844	0.000568587	0.000490828		0.00125494	0.00289895	0.00116909	0.00109133
0.925874	0.92671	0.932919	0.931969	0.93852			0.000835665	0.00704427	0.00609499	0.0126453		0.000921839	0.00123004	0.00249705	0.00026926	0.000185453		0.00215188	0.00341889	0.0011911	0.00110729
0.934593	0.912543	0.920617	0.935827	0.927387			-0.0220508	-0.0139765	0.00123327	-0.0072064		0.00100963	0.000858465	0.00235097	0.000626712	0.000797191		0.0018681	0.0033606	0.00163634	0.00180682
0.924211	0.916421	0.935119	0.936304	0.931706			-0.00778985	0.0109086	0.0120929	0.00749484		0.00119638	0.000851399	0.00350447	0.00106321	0.000431893		0.00204778	0.00470085	0.00225958	0.00162827
0.927373	0.918503	0.922767	0.938324	0.933438			-0.00887005	-0.00460656	0.0109507	0.00606458		0.00121108	0.00117904	0.00361828	0.000527935	0.000583129		0.00239012	0.00482936	0.00173902	0.00179421
0.926246	0.923617	0.925425	0.93216	0.941819			-0.0026293	-0.00082133	0.00591395	0.0155722		0.00134885	0.00111043	0.00280572	0.000596651	0.000702311		0.00245928	0.00415457	0.0019455	0.00205116
0.929817	0.923471	0.926176	0.935606	0.93233			-0.00634598	-0.00364124	0.00578902	0.00251222		0.000928322	0.00119539	0.00245002	0.000640606	0.00111386		0.00212372	0.00337834	0.00156893	0.00204218
0.928063	0.923649	0.920127	0.933426	0.932352			-0.00441354	-0.00793585	0.00536325	0.00428918		0.00101344	0.000585886	0.00313262	0.00103789	0.00079311		0.00159933	0.00414606	0.00205133	0.00180655
0.929774	0.925331	0.92313	0.931633	0.932107			-0.00444231	-0.00664383	0.0018592	0.00233301		0.000500821	0.00120979	0.00331874	0.00117218	0.000394915		0.00171061	0.00381956	0.001673	0.000895737
0.927897	0.918415	0.925965	0.930622	0.939792			-0.00948137	-0.00193197	0.00272549	0.0118951		0.000766141	0.00155729	0.00366579	0.00130696	0.000214993		0.00232343	0.00443193	0.0020731	0.000981134
0.932373	0.926825	0.910167	0.944319	0.942523			-0.00554825	-0.0222062	0.0119457	0.0101494		0.00144586	0.000715469	0.00329117	0.000681217	0.000472648		0.00216133	0.00473703	0.00212708	0.00191851
0.929108	0.924118	0.929552	0.933903	0.924124			-0.00498988	0.000443895	0.0047945	-0.00498424		0.000529723	0.000540955	0.00438631	0.000835681	0.000298924		0.00107068	0.00491603	0.0013654	0.000828647
0.92917	0.925791	0.91735	0.938866	0.929569			-0.00337821	-0.01182	0.0096959	0.000399743		0.00143043	0.000957125	0.00324211	0.00101041	0.000670738		0.00238755	0.00467254	0.00244083	0.00210116
0.929519	0.91825	0.925787	0.938107	0.941174			-0.0112693	-0.00373261	0.00858762	0.0116548		0.00142978	0.00103527	0.0028931	0.000503841	0.000327077		0.00246506	0.00432288	0.00193363	0.00175686
0.937615	0.923843	0.91922	0.934157	0.943195			-0.0137716	-0.0183948	-0.00345823	0.00557995		0.00231558	0.000397742	0.00355747	0.000414551	0.000442316		0.00271332	0.00587305	0.00273013	0.0027579
0.928144	0.919995	0.931254	0.950951	0.931447			-0.0081489	0.00310981	0.0228072	0.00330321		0.000955853	0.000790985	0.00313307	0.000862084	0.000424159		0.00174684	0.00408893	0.00181794	0.00138001
0.916017	0.927915	0.920879	0.933266	0.930805			0.0118984	0.0048623	0.0172489	0.0147878		0.00142217	0.00086005	0.00332851	0.000300636	0.000361553		0.00228222	0.00475067	0.0017228	0.00178372
0.93374	0.916856	0.91919	0.934483	0.940762			-0.0168839	-0.0145498	0.000743139	0.00702225		0.00159254	0.00111794	0.00313635	0.000330059	0.000548027		0.00271048	0.00472889	0.0019226	0.00214057
0.929307	0.908578	0.923194	0.934949	0.931299			-0.0207286	-0.00611299	0.00564226	0.00199262		0.000986053	0.00074419	0.0035523	0.000462853	0.000431245		0.00173024	0.00453835	0.00144891	0.0014173
0.933918	0.914395	0.911495	0.931202	0.950689			-0.0195232	-0.0224226	-0.00271557	0.0167709		0.00122981	0.00107514	0.00391063	0.000640122	0.000359295		0.00230495	0.00514044	0.00186993	0.00158911
0.921229	0.917206	0.922892	0.938811	0.936116			-0.00402327	0.00166227	0.0175812	0.0148865		0.00102742	0.00108495	0.00295284	0.000668694	0.000351428		0.00211237	0.00398026	0.00169611	0.00137885
0.9363	0.915332	0.916075	0.940786	0.925274			-0.0209681	-0.0202247	0.00448618	-0.0110257		0.000693628	0.00093406	0.00309872	0.000467192	0.000694598		0.00162769	0.00379235	0.00116082	0.00138823
0.929731	0.915737	0.91487	0.950187	0.928463			-0.0139935	-0.0148602	0.0204564	-0.00126725		0.00101958	0.00157471	0.00315533	0.000950876	0.000791867		0.00259429	0.00417491	0.00197046	0.00181145
0.925822	0.922771	0.918063	0.929463	0.937948			-0.00305058	-0.0077589	0.00364111	0.0121258		0.00127875	0.00209317	0.00267655	0.000888893	0.000656303		0.00337192	0.0039553	0.00216765	0.00193506
0.927612	0.911082	0.925437	0.942279	0.940134			-0.0165305	-0.00217524	0.0146666	0.0125214		0.000444941	0.00116536	0.00346339	0.000780487	0.000694061		0.0016103	0.00390833	0.00122543	0.001139
0.925747	0.932778	0.927471	0.938622	0.943562			0.00703081	0.00172384	0.012875	0.0178155		0.00139924	0.00171623	0.00269945	0.00123629	0.000297631		0.00311547	0.0040987	0.00263553	0.00169687
0.92806	0.92731	0.926265	0.945199	0.931104			-0.000749593	-0.00179479	0.0171397	0.00304443		0.000732363	0.00124589	0.00300493	0.00056096	0.000362621		0.00197826	0.0037373	0.00129332	0.00109498
0.924118	0.912244	0.920744	0.946654	0.938334			-0.0118736	-0.00337424	0.0225364	0.014216		0.00104827	0.00104802	0.00444993	0.00101601	0.000225885		0.00209628	0.0054982	0.00206428	0.00127415
0.93166	0.919441	0.910583	0.931271	0.940407			-0.0122196	-0.0210767	-0.000388792	0.00874719		0.00117594	0.00113369	0.00354164	0.000775457	0.000456434		0.00230964	0.00471758	0.0019514	0.00163238
0.928211	0.919591	0.926065	0.933754	0.954323			-0.00862015	-0.00214615	0.00554325	0.0261117		0.00073945	0.00153015	0.00408136	0.000529618	0.00121948		0.0022696	0.00482081	0.00126907	0.00195893
0.92898	0.914461	0.911348	0.938007	0.926361			-0.0145192	-0.0176322	0.00902673	-0.00261895		0.00093927	0.000948107	0.00310789	0.000614824	0.000377358		0.00188738	0.00404716	0.00155409	0.00131663
0.92849	0.912369	0.912452	0.935109	0.930585			-0.0161206	-0.0160371	0.00661982	0.00209552		0.000906877	0.00125049	0.00529591	0.0004424	0.000483291		0.00215737	0.00620279	0.00134928	0.00139017
0.921773	0.912778	0.915658	0.940666	0.937256			-0.00899548	-0.00611504	0.0188934	0.0154828		0.000506223	0.0018392	0.00388102	0.000683297	0.000771008		0.00234542	0.00438725	0.00118952	0.00127723
0.927859	0.920492	0.928599	0.928965	0.938995			-0.00736685	0.000739786	0.00110567	0.0111357		0.00105843	0.00110169	0.00351696	0.000339791	0.000209573		0.00216012	0.00457539	0.00139822	0.001268
0.930777	0.913181	0.918187	0.937221	0.93966			-0.0175966	-0.01259	0.00644418	0.00888302		0.000341588	0.00168957	0.00311274	0.000495869	0.000921854		0.00203116	0.00345433	0.000837457	0.00126344
0.932916	0.918384	0.912129	0.931526	0.94139			-0.0145321	-0.0207869	-0.00138979	0.00847392		0.00154975	0.000972213	0.00395597	0.000651837	0.000457267		0.00252196	0.00550572	0.00220158	0.00200701

## Sheet: 4J 1hUV
Cell 00						Cell 01						Cell 02						Cell 03						Cell 04						Cell 05						Cell 06						Cell 07						Cell 08
	paste BG		average pre-bleach				paste BG		average pre-bleach				paste BG		average pre-bleach				paste BG		average pre-bleach				paste BG		average pre-bleach				paste BG		average pre-bleach				paste BG		average pre-bleach				paste BG		average pre-bleach				paste BG
	1	9.229	539.759				1	8.892	648.541				1	10.654	596.092				1	9.106	800.507				1	9.719	654.509				1	10.362	629.463				1	9.662	471.634				1	9.924	502.349				1
	paste FRAP	RAW					paste FRAP	RAW					paste FRAP	RAW					paste FRAP	RAW					paste FRAP	RAW					paste FRAP	RAW					paste FRAP	RAW					paste FRAP	RAW					paste FRAP
Time	data here		minus BG	Normalized		Time	data here		minus BG	Normalized		Time	data here		minus BG	Normalized		Time	data here		minus BG	Normalized		Time	data here		minus BG	Normalized		Time	data here		minus BG	Normalized		Time	data here		minus BG	Normalized		Time	data here		minus BG	Normalized		Time	data here
0	1	577.254	568.025	1.05237		0	1	691.434	682.542	1.05243		0	1	632.085	621.431	1.04251		0	1	859.807	850.701	1.0627		0	1	714.833	705.114	1.07732		0	1	696.059	685.697	1.08934		0	1	511.072	501.41	1.06313		0	1	534.908	524.984	1.04506		0	1
0.0798342	2	581.659	572.43	1.06053		0.0779433	2	681.125	672.233	1.03653		0.0798342	2	626.003	615.349	1.03231		0.0798342	2	853.873	844.767	1.05529		0.0798342	2	694.983	685.264	1.04699		0.0798342	2	674.125	663.763	1.05449		0.0779433	2	501.204	491.542	1.04221		0.0798342	2	523.134	513.21	1.02162		0.0798342	2
0.171676	3	573.494	564.265	1.0454		0.171896	3	667.725	658.833	1.01587		0.171676	3	617.462	606.808	1.01798		0.171676	3	849.579	840.473	1.04993		0.170675	3	689.426	679.707	1.0385		0.171676	3	655.703	645.341	1.02523		0.171896	3	484.46	474.798	1.00671		0.171676	3	529.135	519.211	1.03357		0.170675	3
0.271522	4	562.86	553.631	1.0257		0.271853	4	668.636	659.744	1.01727		0.271522	4	619.186	608.532	1.02087		0.271522	4	820.797	811.691	1.01397		0.270521	4	683.143	673.424	1.0289		0.271522	4	659.071	648.709	1.03058		0.271853	4	485.092	475.43	1.00805		0.271522	4	518.601	508.677	1.0126		0.271522	4
0.370368	5	562.31	553.081	1.02468		0.371809	5	669.13	660.238	1.01804		0.371368	5	609.502	598.848	1.00462		0.371368	5	824.739	815.633	1.0189		0.370368	5	682.655	672.936	1.02815		0.372369	5	644.263	633.901	1.00705		0.371809	5	497.099	487.437	1.03351		0.371368	5	538.802	528.878	1.05281		0.371368	5
0.472215	6	552.078	542.849	1.00573		0.471766	6	672.094	663.202	1.02261		0.471215	6	621.965	611.311	1.02553		0.471215	6	830.32	821.214	1.02587		0.471215	6	677.937	668.218	1.02095		0.472215	6	655.97	645.608	1.02565		0.471766	6	494.232	484.57	1.02743		0.470214	6	530.101	520.177	1.03549		0.471215	6
0.57006	7	552.73	543.501	1.00693		0.569721	7	685.536	676.644	1.04333		0.572061	7	618.509	607.855	1.01973		0.571061	7	832.627	823.521	1.02875		0.571061	7	664.06	654.341	0.999744		0.572061	7	635.05	624.688	0.992415		0.573724	7	489.288	479.626	1.01694		0.572061	7	509.995	500.071	0.995466		0.571061	7
0.671908	8	548.45	539.221	0.999004		0.669678	8	668.549	659.657	1.01714		0.671908	8	612.019	601.365	1.00885		0.671908	8	839.848	830.742	1.03777		0.670907	8	660.059	650.34	0.993631		0.671908	8	665.677	655.315	1.04107		0.671679	8	471.043	461.381	0.97826		0.669907	8	517.797	507.873	1.011		0.670907	8
0.771754	9	575.362	566.133	1.04886		0.769635	9	662.307	653.415	1.00752		0.771754	9	625.896	615.242	1.03213		0.771754	9	819.995	810.889	1.01297		0.770753	9	650.151	640.432	0.978493		0.771754	9	659.281	648.919	1.03091		0.771636	9	480.981	471.319	0.999332		0.771754	9	510.402	500.478	0.996276		0.771754	9
0.8706	10	569.645	560.416	1.03827		0.871592	10	649.991	641.099	0.988525		0.8716	10	626.577	615.923	1.03327		0.8716	10	834.682	825.576	1.03132		0.8706	10	665.294	655.575	1.00163		0.872601	10	640.976	630.614	1.00183		0.871592	10	487.386	477.724	1.01291		0.869599	10	511.173	501.249	0.997811		0.8716	10
0.972447	11	554.485	545.256	1.01018		0.970548	11	636.104	627.212	0.967113		0.971447	11	610.936	600.282	1.00703		0.971447	11	801.992	792.886	0.99048		0.971447	11	661.692	651.973	0.996126		0.972447	11	641.021	630.659	1.0019		0.971549	11	501.285	491.623	1.04238		0.970446	11	515.919	505.995	1.00726		0.971447	11
1.07029	12	556.294	547.065	1.01354		1.07051	12	654.867	645.975	0.996044		1.07129	12	595.455	584.801	0.981058		1.07129	12	815.737	806.631	1.00765		1.06929	12	684.485	674.766	1.03095		1.07229	12	644.623	634.261	1.00762		1.07151	12	473.038	463.376	0.98249		1.07129	12	500.134	490.21	0.975836		1.07129	12
1.17214	13	533.331	524.102	0.970993		1.17046	13	646.146	637.254	0.982597		1.17214	13	598.175	587.521	0.985622		1.17214	13	803.394	794.288	0.992231		1.17114	13	663.711	653.992	0.999211		1.17214	13	637.066	626.704	0.995618		1.17246	13	481.656	471.994	1.00076		1.17014	13	514.795	504.871	1.00502		1.17114	13
1.27099	14	549.694	540.465	1.00131		1.27042	14	643.138	634.246	0.977959		1.27199	14	617.786	607.132	1.01852		1.27199	14	811.255	802.149	1.00205		1.27099	14	674.128	664.409	1.01513		1.27199	14	646.411	636.049	1.01046		1.27242	14	485.881	476.219	1.00972		1.27199	14	516.53	506.606	1.00847		1.27199	14
1.37083	15	553.401	544.172	1.00818		1.37238	15	659.594	650.702	1.00333		1.36983	15	614.708	604.054	1.01336		1.37183	15	802.969	793.863	0.9917		1.37083	15	657.963	648.244	0.990428		1.37283	15	655.554	645.192	1.02499		1.37238	15	480.815	471.153	0.99898		1.37183	15	518.628	508.704	1.01265		1.37183	15
1.47068	16	537.903	528.674	0.979463		1.47033	16	679.983	671.091	1.03477		1.47168	16	595.852	585.198	0.981724		1.47168	16	817.304	808.198	1.00961		1.47168	16	651.608	641.889	0.980719		1.47068	16	632.571	622.209	0.988477		1.47233	16	488.718	479.056	1.01574		1.47068	16	504.095	494.171	0.983721		1.47168	16
1.57052	17	568.101	558.872	1.03541		1.57029	17	657.573	648.681	1.00022		1.57153	17	612.921	602.267	1.01036		1.57052	17	830.822	821.716	1.02649		1.56952	17	660.854	651.135	0.994845		1.57253	17	640.797	630.435	1.00154		1.57229	17	489.746	480.084	1.01792		1.57052	17	512.857	502.933	1.00116		1.57153	17
1.67237	18	550.891	541.662	1.00353		1.67024	18	650.934	642.042	0.98998		1.67237	18	603.078	592.424	0.993847		1.67237	18	818.683	809.577	1.01133		1.67137	18	663.214	653.495	0.998451		1.67137	18	631.755	621.393	0.98718		1.67225	18	480.49	470.828	0.998291		1.67037	18	520.486	510.562	1.01635		1.67137	18
1.77122	19	541.549	532.32	0.986218		1.7702	19	675.387	666.495	1.02768		1.77222	19	592.623	581.969	0.976308		1.77022	19	799.862	790.756	0.987819		1.77122	19	649.35	639.631	0.977269		1.77222	19	642.252	631.89	1.00386		1.7722	19	461.487	451.825	0.957999		1.77222	19	506.377	496.453	0.988264		1.77222	19
1.87106	20	544.229	535	0.991183		1.87016	20	670.601	661.709	1.0203		1.87206	20	625.925	615.271	1.03217		1.87206	20	794.112	785.006	0.980636		1.87106	20	675.272	665.553	1.01687		1.87307	20	626.196	615.834	0.978349		1.87216	20	469.846	460.184	0.975722		1.87006	20	512.907	502.983	1.00126		1.87206	20
2.03032	21	360.559	351.33	0.650902		2.02563	21	457.554	448.662	0.691802		2.03132	21	428.589	417.935	0.701125		2.03132	21	538.816	529.71	0.661718		2.03032	21	462.117	452.398	0.691202		2.03232	21	414.919	404.557	0.642702		2.02763	21	321.509	311.847	0.661205		2.02932	21	327.807	317.883	0.632793		2.03132	21
2.11015	22	394.046	384.817	0.712943		2.10357	22	505.926	497.034	0.766388		2.11115	22	460.355	449.701	0.754416		2.11115	22	597.545	588.439	0.735083		2.11015	22	504.098	494.379	0.755344		2.11215	22	456.819	446.457	0.709267		2.10557	22	340.757	331.095	0.702017		2.10915	22	373.553	363.629	0.723858		2.11115	22
2.19799	23	417.995	408.766	0.757312		2.19452	23	531.851	522.959	0.806363		2.19999	23	479.733	469.079	0.786924		2.19799	23	642.044	632.938	0.790671		2.19899	23	514.01	504.291	0.770488		2.20199	23	466.853	456.491	0.725208		2.19652	23	351.358	341.696	0.724494		2.19799	23	390.741	380.817	0.758073		2.20099	23
2.29884	24	424.609	415.38	0.769566		2.29448	24	529.561	520.669	0.802832		2.29984	24	515.219	504.565	0.846455		2.29984	24	656.3	647.194	0.80848		2.29884	24	541.918	532.199	0.813127		2.30184	24	493.953	483.591	0.76826		2.29648	24	376.372	366.71	0.777531		2.29784	24	398.158	388.234	0.772838		2.30084	24
2.39868	25	425.892	416.663	0.771943		2.39544	25	531.124	522.232	0.805242		2.39968	25	503.322	492.668	0.826497		2.39968	25	668.181	659.075	0.823322		2.39868	25	556.09	546.371	0.83478		2.40168	25	510.445	500.083	0.79446		2.39644	25	377.449	367.787	0.779814		2.39768	25	415.262	405.338	0.806886		2.40068	25
2.49853	26	438.763	429.534	0.795789		2.49339	26	555.459	546.567	0.842764		2.49853	26	509.432	498.778	0.836747		2.49953	26	687.42	678.314	0.847355		2.49753	26	550.371	540.652	0.826042		2.50153	26	526.818	516.456	0.820471		2.49639	26	383.79	374.128	0.793259		2.49853	26	417.429	407.505	0.811199		2.50153	26
2.59838	27	447.251	438.022	0.811514		2.59535	27	566.37	557.478	0.859588		2.59938	27	516.874	506.22	0.849231		2.59938	27	676.758	667.652	0.834036		2.59938	27	573.288	563.569	0.861057		2.60238	27	517.142	506.78	0.805099		2.59635	27	380.963	371.301	0.787265		2.59838	27	413.585	403.661	0.803547		2.60138	27
2.69722	28	447.496	438.267	0.811968		2.69531	28	563.896	555.004	0.855774		2.70022	28	524.359	513.705	0.861788		2.70022	28	695.748	686.642	0.857759		2.69922	28	584.595	574.876	0.878332		2.70022	28	530.098	519.736	0.825682		2.69631	28	400.847	391.185	0.829425		2.69822	28	422.975	413.051	0.822239		2.70122	28
2.79907	29	462.801	453.572	0.840323		2.79526	29	585.371	576.479	0.888886		2.80007	29	510.27	499.616	0.838153		2.80007	29	701.658	692.552	0.865142		2.79907	29	592.311	582.592	0.890121		2.80207	29	519.584	509.222	0.808979		2.79726	29	395.91	386.248	0.818957		2.79807	29	437.141	427.217	0.850439		2.80107	29
2.89891	30	466.005	456.776	0.846259		2.89322	30	578.244	569.352	0.877897		2.89992	30	519.54	508.886	0.853704		2.89992	30	702.478	693.372	0.866166		2.89791	30	598.796	589.077	0.900029		2.90192	30	554.788	544.426	0.864906		2.89722	30	409.128	399.466	0.846983		2.89791	30	444.405	434.481	0.864899		2.90092	30
2.99876	31	459.494	450.265	0.834197		2.99318	31	581.757	572.865	0.883314		2.99876	31	553.149	542.495	0.910086		2.99976	31	683.809	674.703	0.842845		2.99776	31	586.027	576.308	0.88052		3.00176	31	532.249	521.887	0.829099		2.99518	31	391.375	381.713	0.809341		2.99876	31	439.582	429.658	0.855298		3.00176	31
3.09861	32	465.115	455.886	0.844611		3.09513	32	582.341	573.449	0.884214		3.09961	32	538.127	527.473	0.884885		3.09961	32	698.466	689.36	0.861154		3.09961	32	605.815	596.096	0.910753		3.10261	32	525.512	515.15	0.818397		3.09513	32	411.719	402.057	0.852476		3.09861	32	440.498	430.574	0.857122		3.09961	32
3.19745	33	463.454	454.225	0.841533		3.19409	33	585.468	576.576	0.889036		3.19845	33	557.05	546.396	0.91663		3.19845	33	692.914	683.808	0.854219		3.19945	33	605.751	596.032	0.910656		3.20246	33	536.072	525.71	0.835173		3.19709	33	406.24	396.578	0.840859		3.19845	33	442.297	432.373	0.860703		3.20146	33
3.2993	34	465.774	456.545	0.845832		3.29505	34	591.604	582.712	0.898497		3.3003	34	561.416	550.762	0.923955		3.3003	34	699.222	690.116	0.862099		3.2993	34	601.733	592.014	0.904517		3.3023	34	528.184	517.822	0.822641		3.29705	34	415.59	405.928	0.860684		3.2973	34	449.127	439.203	0.874299		3.3013	34
3.39715	35	473.265	464.036	0.85971		3.394	35	592.842	583.95	0.900406		3.40015	35	544.869	534.215	0.896196		3.39815	35	713.403	704.297	0.879814		3.39815	35	598.652	588.933	0.899809		3.40115	35	538.792	528.43	0.839494		3.397	35	419.393	409.731	0.868747		3.39815	35	449.671	439.747	0.875382		3.40115	35
3.49699	36	481.217	471.988	0.874442		3.49396	36	589.037	580.145	0.894539		3.49899	36	540.381	529.727	0.888667		3.49999	36	708.236	699.13	0.873359		3.49799	36	604.409	594.69	0.908605		3.502	36	524.713	514.351	0.817127		3.49696	36	414.459	404.797	0.858286		3.49899	36	456.685	446.761	0.889344		3.49999	36
3.59884	37	495.91	486.681	0.901664		3.59392	37	593.77	584.878	0.901837		3.59984	37	555.925	545.271	0.914743		3.59884	37	702.374	693.268	0.866036		3.59784	37	601.304	591.585	0.903861		3.60084	37	549.822	539.46	0.857017		3.59592	37	407.84	398.178	0.844252		3.59884	37	454.463	444.539	0.884921		3.59984	37
3.69769	38	477.914	468.685	0.868323		3.69587	38	590.856	581.964	0.897344		3.69869	38	563.142	552.488	0.92685		3.69869	38	707.765	698.659	0.872771		3.69769	38	591.445	581.726	0.888798		3.70069	38	538.838	528.476	0.839567		3.69687	38	425.905	416.243	0.882555		3.69668	38	433.713	423.789	0.843615		3.70169	38
3.79953	39	486.078	476.849	0.883448		3.79383	39	603.526	594.634	0.91688		3.80053	39	547.814	537.16	0.901136		3.79853	39	710.639	701.533	0.876361		3.79953	39	607.585	597.866	0.913458		3.80253	39	558.971	548.609	0.871551		3.79583	39	410.18	400.518	0.849213		3.79753	39	452.157	442.233	0.880331		3.80053	39
3.89738	40	481.249	472.02	0.874502		3.89379	40	590.584	581.692	0.896924		3.89838	40	559.436	548.782	0.920633		3.89838	40	722.571	713.465	0.891266		3.89838	40	576.65	566.931	0.866193		3.90138	40	563.518	553.156	0.878775		3.89779	40	422.089	412.427	0.874464		3.89838	40	451.654	441.73	0.879329		3.90138	40
3.99722	41	486.156	476.927	0.883593		3.99374	41	583.961	575.069	0.886712		3.99923	41	548.591	537.937	0.90244		4.00023	41	730.065	720.959	0.900628		3.99822	41	584.986	575.267	0.878929		4.00223	41	565.277	554.915	0.881569		3.99574	41	426.767	417.105	0.884382		3.99722	41	459.453	449.529	0.894854		4.00223	41
4.09907	42	486.213	476.984	0.883698		4.0937	42	606.419	597.527	0.921341		4.09907	42	547.154	536.5	0.900029		4.09907	42	707.463	698.357	0.872393		4.09807	42	605.905	596.186	0.910891		4.10107	42	594.059	583.697	0.927294		4.0957	42	415.547	405.885	0.860593		4.09907	42	458.095	448.171	0.892151		4.10007	42
4.19792	43	502.101	492.872	0.913134		4.19366	43	607.403	598.511	0.922858		4.19892	43	547.281	536.627	0.900242		4.19892	43	711.913	702.807	0.877952		4.19792	43	604.426	594.707	0.908631		4.20092	43	573.966	563.604	0.895373		4.19766	43	424.626	414.964	0.879843		4.19692	43	452.276	442.352	0.880567		4.19992	43
4.29976	44	473.264	464.035	0.859708		4.29461	44	600.418	591.526	0.912088		4.30077	44	565.903	555.249	0.931482		4.29876	44	719.442	710.336	0.887358		4.29776	44	588.251	578.532	0.883918		4.30077	44	564.47	554.108	0.880287		4.29561	44	425.917	416.255	0.88258		4.29776	44	472.411	462.487	0.920649		4.30077	44
4.39761	45	476.44	467.211	0.865592		4.39457	45	624.188	615.296	0.948739		4.39861	45	546.654	536	0.89919		4.39861	45	725.398	716.292	0.894798		4.39861	45	604.651	594.932	0.908975		4.40061	45	559.672	549.31	0.872665		4.39557	45	415.682	406.02	0.860879		4.39761	45	456.812	446.888	0.889597		4.40161	45
4.49746	46	502.183	492.954	0.913286		4.49453	46	591.551	582.659	0.898415		4.49946	46	547.423	536.769	0.90048		4.49946	46	728.46	719.354	0.898623		4.49846	46	604.335	594.616	0.908492		4.50246	46	567.323	556.961	0.88482		4.49553	46	421.522	411.86	0.873262		4.49746	46	443.662	433.738	0.86342		4.50046	46
4.5983	47	478.328	469.099	0.86909		4.59448	47	613.306	604.414	0.93196		4.5993	47	556.559	545.905	0.915807		4.5993	47	745.003	735.897	0.919289		4.5983	47	607.712	597.993	0.913652		4.60131	47	578.466	568.104	0.902522		4.59548	47	425.149	415.487	0.880952		4.5973	47	453.005	443.081	0.882019		4.6003	47
4.69815	48	493.233	484.004	0.896704		4.69444	48	604.583	595.691	0.91851		4.69915	48	548.318	537.664	0.901982		4.69915	48	719.56	710.454	0.887505		4.69815	48	597.854	588.135	0.89859		4.70115	48	583.164	572.802	0.909986		4.69644	48	424.819	415.157	0.880252		4.69915	48	449.658	439.734	0.875356		4.70015	48
4.798	49	489.306	480.077	0.889429		4.7964	49	596.402	587.51	0.905895		4.799	49	542.139	531.485	0.891616		4.799	49	740.641	731.535	0.91384		4.8	49	601.822	592.103	0.904653		4.801	49	579.579	569.217	0.90429		4.7964	49	417.075	407.413	0.863833		4.798	49	463.509	453.585	0.902928		4.8	49
4.89784	50	493.641	484.412	0.89746		4.89435	50	598.087	589.195	0.908493		4.89884	50	569.602	558.948	0.937688		4.89884	50	722.07	712.964	0.890641		4.89884	50	613.354	603.635	0.922272		4.90084	50	575.457	565.095	0.897742		4.89635	50	432.996	423.334	0.89759		4.89884	50	458.263	448.339	0.892485		4.90084	50
4.99769	51	495.174	485.945	0.9003		4.99431	51	593.151	584.259	0.900883		4.99969	51	540.201	529.547	0.888365		4.99869	51	734.103	724.997	0.905672		4.99869	51	601.674	591.955	0.904426		5.00169	51	574.553	564.191	0.896306		4.99631	51	419.63	409.968	0.86925		4.99769	51	457.359	447.435	0.890686		5.00069	51
5.09854	52	502.14	492.911	0.913206		5.09427	52	608.787	599.895	0.924992		5.09954	52	577.026	566.372	0.950142		5.09954	52	722.962	713.856	0.891755		5.09854	52	599.628	589.909	0.9013		5.10154	52	565.467	555.105	0.881871		5.09627	52	424.203	414.541	0.878946		5.09954	52	455.575	445.651	0.887135		5.10054	52
5.19838	53	495.353	486.124	0.900632		5.19422	53	614.688	605.796	0.934091		5.19938	53	564.731	554.077	0.929516		5.19938	53	725.153	716.047	0.894492		5.19838	53	607.09	597.371	0.912701		5.20138	53	591.247	580.885	0.922827		5.19622	53	425.033	415.371	0.880706		5.19738	53	457.006	447.082	0.889983		5.20038	53
5.29823	54	476.263	467.034	0.865264		5.29418	54	618.816	609.924	0.940456		5.29923	54	562.12	551.466	0.925136		5.29923	54	712.893	703.787	0.879177		5.29823	54	606.276	596.557	0.911458		5.30123	54	579.322	568.96	0.903882		5.29618	54	427.408	417.746	0.885742		5.29823	54	460.572	450.648	0.897082		5.30023	54
5.39807	55	480.408	471.179	0.872944		5.39413	55	606.361	597.469	0.921251		5.39907	55	566.079	555.425	0.931777		5.39907	55	741.369	732.263	0.914749		5.39907	55	599.918	590.199	0.901744		5.40108	55	577.818	567.456	0.901493		5.39614	55	419.797	410.135	0.869604		5.39807	55	455.502	445.578	0.886989		5.40108	55
5.49792	56	482.68	473.451	0.877153		5.49509	56	601.99	593.098	0.914512		5.49992	56	566.453	555.799	0.932405		5.49892	56	741.541	732.435	0.914964		5.49892	56	609.531	599.812	0.916431		5.50192	56	567.757	557.395	0.885509		5.49609	56	423.394	413.732	0.877231		5.49792	56	454.422	444.498	0.884839		5.50092	56
5.59877	57	501.261	492.032	0.911578		5.59505	57	629.615	620.723	0.957107		5.59977	57	570.016	559.362	0.938382		5.59977	57	720.394	711.288	0.888547		5.59877	57	600.255	590.536	0.902258		5.60177	57	575.07	564.708	0.897127		5.59605	57	407.129	397.467	0.842744		5.59777	57	472.168	462.244	0.920165		5.60077	57
5.69861	58	472.864	463.635	0.858967		5.69501	58	603.552	594.66	0.91692		5.69961	58	575.522	564.868	0.947619		5.69961	58	713.996	704.89	0.880554		5.69861	58	590.9	581.181	0.887965		5.70162	58	568.538	558.176	0.88675		5.69601	58	425.138	415.476	0.880928		5.69761	58	455.905	445.981	0.887792		5.70062	58
5.79846	59	477.906	468.677	0.868308		5.79496	59	602.028	593.136	0.91457		5.79946	59	567.866	557.212	0.934775		5.79946	59	717.213	708.107	0.884573		5.79846	59	601.349	591.63	0.90393		5.80146	59	594.392	584.03	0.927823		5.79696	59	425.294	415.632	0.881259		5.79746	59	468.574	458.65	0.913011		5.80046	59
5.89831	60	473.341	464.112	0.859851		5.89492	60	600.106	591.214	0.911607		5.89931	60	561.323	550.669	0.923799		5.89931	60	729.829	720.723	0.900333		5.89931	60	610.817	601.098	0.918396		5.90131	60	584.185	573.823	0.911608		5.89692	60	423.569	413.907	0.877602		5.89831	60	464.14	454.216	0.904185		5.90131	60
5.99815	61	474.797	465.568	0.862548		5.99287	61	608.207	599.315	0.924098		5.99915	61	569.661	559.007	0.937787		5.99915	61	729.26	720.154	0.899622		5.99715	61	624.69	614.971	0.939592		6.00216	61	577.581	567.219	0.901116		5.99688	61	422.157	412.495	0.874608		5.99815	61	468.438	458.514	0.91274		6.00115	61
6.098	62	482.579	473.35	0.876966		6.09483	62	619.49	610.598	0.941495		6.1	62	579.109	568.455	0.953637		6.1	62	734.433	725.327	0.906085		6.099	62	620.024	610.305	0.932463		6.102	62	579.308	568.946	0.90386		6.09683	62	419.835	410.173	0.869685		6.098	62	462.216	452.292	0.900354		6.101	62
6.19885	63	475.527	466.298	0.863901		6.19479	63	608.525	599.633	0.924588		6.19985	63	572.596	561.942	0.94271		6.19785	63	739.744	730.638	0.912719		6.19885	63	601.882	592.163	0.904744		6.19985	63	581.874	571.512	0.907936		6.19679	63	423.621	413.959	0.877712		6.19785	63	467.769	457.845	0.911409		6.20085	63
6.29869	64	496.683	487.454	0.903096		6.29474	64	605.963	597.071	0.920638		6.29969	64	545.313	534.659	0.896941		6.29969	64	730.836	721.73	0.901591		6.29869	64	610.863	601.144	0.918466		6.30169	64	587.362	577	0.916655		6.29675	64	436.706	427.044	0.905456		6.29769	64	448.344	438.42	0.87274		6.30069	64
6.39854	65	496.79	487.561	0.903294		6.3947	65	613.452	604.56	0.932185		6.39954	65	564.025	553.371	0.928332		6.39954	65	726.229	717.123	0.895836		6.39954	65	633.916	624.197	0.953688		6.40154	65	575.212	564.85	0.897353		6.3967	65	414.751	405.089	0.858905		6.39854	65	459.622	449.698	0.895191		6.40154	65
6.49838	66	474.574	465.345	0.862135		6.49366	66	620.988	612.096	0.943805		6.49939	66	561.166	550.512	0.923535		6.49939	66	751.267	742.161	0.927114		6.49738	66	615.297	605.578	0.925241		6.50239	66	580.521	570.159	0.905787		6.49666	66	419.162	409.5	0.868258		6.49838	66	459.94	450.016	0.895824		6.50139	66
6.59823	67	456.988	447.759	0.829554		6.59461	67	611.412	602.52	0.92904		6.60023	67	558.022	547.368	0.918261		6.60023	67	740.772	731.666	0.914003		6.59923	67	623.121	613.402	0.937195		6.60223	67	590.408	580.046	0.921494		6.59562	67	426.861	417.199	0.884582		6.59823	67	467.822	457.898	0.911514		6.60123	67
6.69908	68	482.474	473.245	0.876771		6.69557	68	639.92	631.028	0.972997		6.70008	68	567.879	557.225	0.934797		6.69808	68	738.725	729.619	0.911446		6.69908	68	623.507	613.788	0.937784		6.70008	68	580.655	570.293	0.906		6.69657	68	426.44	416.778	0.883689		6.69808	68	464.237	454.313	0.904378		6.70108	68
6.79892	69	494.553	485.324	0.89915		6.79553	69	603.698	594.806	0.917145		6.79992	69	554.946	544.292	0.913101		6.79992	69	749.067	739.961	0.924365		6.79892	69	620.549	610.83	0.933265		6.80193	69	574.891	564.529	0.896843		6.79553	69	419.26	409.598	0.868465		6.79792	69	456.438	446.514	0.888853		6.80093	69
6.89677	70	491.078	481.849	0.892712		6.89549	70	623.715	614.823	0.94801		6.89977	70	566.632	555.978	0.932705		6.89877	70	751.919	742.813	0.927928		6.89977	70	609.762	600.043	0.916784		6.90077	70	567.704	557.342	0.885425		6.89649	70	425.624	415.962	0.881959		6.89877	70	458.306	448.382	0.892571		6.90177	70
6.99862	71	475.236	466.007	0.863362		6.99344	71	611.562	602.67	0.929271		6.99862	71	575.424	564.77	0.947455		6.99962	71	744.039	734.933	0.918084		6.99762	71	604.404	594.685	0.908598		7.00262	71	569.228	558.866	0.887846		6.99744	71	413.062	403.4	0.855324		6.99862	71	456.29	446.366	0.888558		7.00162	71
7.09846	72	489.453	480.224	0.889701		7.0954	72	608.409	599.517	0.924409		7.10046	72	561.804	551.15	0.924606		7.10046	72	731.406	722.3	0.902303		7.09946	72	612.968	603.249	0.921682		7.10046	72	571.02	560.658	0.890693		7.0954	72	421.322	411.66	0.872837		7.09846	72	459.359	449.435	0.894667		7.09946	72
7.19731	73	492.852	483.623	0.895998		7.19335	73	629.293	620.401	0.956611		7.19831	73	563.008	552.354	0.926626		7.19831	73	765.507	756.401	0.944902		7.19831	73	631.248	621.529	0.949612		7.20031	73	564.172	553.81	0.879814		7.19736	73	419.677	410.015	0.86935		7.19831	73	474.511	464.587	0.92483		7.20131	73
7.29916	74	482.221	472.992	0.876303		7.29531	74	629.803	620.911	0.957397		7.30016	74	576.248	565.594	0.948837		7.30016	74	739.412	730.306	0.912304		7.29916	74	622.045	612.326	0.935551		7.30216	74	563.234	552.872	0.878324		7.29531	74	419.115	409.453	0.868158		7.29716	74	457.619	447.695	0.891203		7.30116	74
7.397	75	485.554	476.325	0.882478		7.39427	75	632.923	624.031	0.962208		7.399	75	565.895	555.241	0.931469		7.399	75	730.619	721.513	0.90132		7.4	75	622.18	612.461	0.935757		7.402	75	572.671	562.309	0.893316		7.39727	75	428.86	419.198	0.88882		7.399	75	472.818	462.894	0.921459		7.402	75
7.49785	76	494.637	485.408	0.899305		7.49422	76	618.034	609.142	0.93925		7.49885	76	578.535	567.881	0.952674		7.49985	76	755.431	746.325	0.932315		7.49785	76	611.844	602.125	0.919965		7.50285	76	574.672	564.31	0.896495		7.49522	76	421.969	412.307	0.874209		7.49685	76	473.312	463.388	0.922443		7.50185	76
7.5987	77	492.322	483.093	0.895016		7.59518	77	625.133	616.241	0.950196		7.5987	77	578.908	568.254	0.953299		7.5987	77	769.884	760.778	0.95037		7.59769	77	605.644	595.925	0.910492		7.6027	77	567.547	557.185	0.885176		7.59518	77	424.033	414.371	0.878586		7.5987	77	480.565	470.641	0.936881		7.5997	77
7.69754	78	481.672	472.443	0.875285		7.69414	78	620.622	611.73	0.943241		7.69854	78	573.846	563.192	0.944807		7.69854	78	748.73	739.624	0.923944		7.69854	78	612.439	602.72	0.920874		7.70054	78	574.497	564.135	0.896217		7.69614	78	421.481	411.819	0.873175		7.69754	78	468.485	458.561	0.912834		7.70154	78
7.79939	79	489.36	480.131	0.889529		7.7961	79	615.935	607.043	0.936014		7.80039	79	571.964	561.31	0.94165		7.79839	79	741.797	732.691	0.915284		7.79939	79	627.816	618.097	0.944368		7.80139	79	562.42	552.058	0.877031		7.7961	79	421.739	412.077	0.873722		7.79739	79	467.963	458.039	0.911795		7.80039	79
7.89723	80	474.352	465.123	0.861724		7.89405	80	624.632	615.74	0.949424		7.90024	80	566.388	555.734	0.932296		7.89923	80	759.127	750.021	0.936932		7.89823	80	612.204	602.485	0.920515		7.90124	80	593.361	582.999	0.926185		7.89605	80	415.402	405.74	0.860285		7.89923	80	478.835	468.911	0.933437		7.90024	80
7.99808	81	488.206	478.977	0.887391		7.99401	81	623.431	614.539	0.947572		7.99908	81	557.825	547.171	0.917931		7.99908	81	748.379	739.273	0.923506		7.99808	81	628.559	618.84	0.945503		8.00308	81	594.695	584.333	0.928305		7.99601	81	423.135	413.473	0.876682		7.99908	81	462.169	452.245	0.900261		8.00208	81
8.09893	82	491.288	482.059	0.893101		8.09396	82	624.893	616.001	0.949826		8.10093	82	569.281	558.627	0.937149		8.10093	82	740.067	730.961	0.913123		8.09793	82	616.489	606.77	0.927062		8.10093	82	575.117	564.755	0.897202		8.09597	82	425.552	415.89	0.881806		8.09893	82	461.777	451.853	0.899481		8.09993	82
8.19777	83	471.146	461.917	0.855784		8.19392	83	609.963	601.071	0.926805		8.19877	83	561.071	550.417	0.923376		8.19877	83	740.164	731.058	0.913244		8.19777	83	623.176	613.457	0.937279		8.20078	83	589.374	579.012	0.919851		8.19592	83	414.961	405.299	0.85935		8.19777	83	472.547	462.623	0.92092		8.20078	83
8.29762	84	492.742	483.513	0.895795		8.29588	84	628.233	619.341	0.954976		8.29862	84	570.483	559.829	0.939166		8.29862	84	723.386	714.28	0.892285		8.29862	84	622.664	612.945	0.936496		8.30062	84	601.455	591.093	0.939044		8.29588	84	429.953	420.291	0.891138		8.29762	84	467.676	457.752	0.911223		8.30062	84
8.39747	85	483.381	474.152	0.878452		8.39383	85	627.184	618.292	0.953359		8.39947	85	580.682	570.028	0.956275		8.39947	85	748.986	739.88	0.924264		8.39847	85	594.209	584.49	0.893021		8.40147	85	594.495	584.133	0.927987		8.39583	85	419.07	409.408	0.868063		8.39947	85	459.236	449.312	0.894422		8.40247	85
8.49831	86	483.964	474.735	0.879532		8.49479	86	616.708	607.816	0.937206		8.49931	86	574.374	563.72	0.945693		8.50031	86	722.102	712.996	0.890681		8.49831	86	614.825	605.106	0.924519		8.50131	86	585.356	574.994	0.913468		8.49579	86	433.956	424.294	0.899625		8.49731	86	472.899	462.975	0.921621		8.50031	86
8.59816	87	482.823	473.594	0.877418		8.59475	87	619.623	610.731	0.9417		8.59916	87	577.145	566.491	0.950342		8.59916	87	735.104	725.998	0.906923		8.59816	87	620.807	611.088	0.933659		8.60116	87	582.017	571.655	0.908164		8.59575	87	423.221	413.559	0.876864		8.59916	87	480.464	470.54	0.93668		8.60016	87
8.69801	88	485.409	476.18	0.882209		8.6947	88	612.965	604.073	0.931434		8.69901	88	566.012	555.358	0.931665		8.69901	88	752.343	743.237	0.928458		8.69801	88	613.18	603.461	0.922006		8.70101	88	594.162	583.8	0.927458		8.6957	88	432.415	422.753	0.896358		8.69801	88	476.014	466.09	0.927821		8.70001	88
8.79985	89	490.232	481.003	0.891144		8.79466	89	608.684	599.792	0.924833		8.79885	89	581.013	570.359	0.956831		8.79885	89	756.937	747.831	0.934197		8.79885	89	610.42	600.701	0.917789		8.80085	89	586.887	576.525	0.9159		8.79566	89	430.599	420.937	0.892507		8.79785	89	473.52	463.596	0.922857		8.80085	89
8.8977	90	478.139	468.91	0.86874		8.89462	90	623.165	614.273	0.947162		8.8997	90	574.316	563.662	0.945596		8.8987	90	753.164	744.058	0.929483		8.8987	90	617.057	607.338	0.92793		8.9017	90	587.824	577.462	0.917389		8.89662	90	437.732	428.07	0.907631		8.8977	90	464.256	454.332	0.904415		8.9007	90
8.99854	91	489.887	480.658	0.890505		8.99457	91	633.602	624.71	0.963255		8.99955	91	577.426	566.772	0.950813		8.99955	91	742.706	733.6	0.916419		8.99854	91	608.844	599.125	0.915381		9.00155	91	595.357	584.995	0.929356		8.99658	91	434.511	424.849	0.900802		8.99754	91	455.873	445.949	0.887728		9.00055	91
9.09839	92	485.34	476.111	0.882081		9.09453	92	607.637	598.745	0.923219		9.09939	92	575.699	565.045	0.947916		9.09939	92	731.989	722.883	0.903031		9.09839	92	606.196	596.477	0.911335		9.10139	92	585.424	575.062	0.913576		9.09653	92	428.98	419.318	0.889075		9.09739	92	466.961	457.037	0.9098		9.10039	92
9.19824	93	480.882	471.653	0.873822		9.19449	93	635.165	626.273	0.965665		9.19924	93	583.867	573.213	0.961619		9.19924	93	739.75	730.644	0.912727		9.19824	93	643.08	633.361	0.967689		9.20124	93	592.121	581.759	0.924215		9.19649	93	432.577	422.915	0.896701		9.19824	93	471.784	461.86	0.919401		9.20024	93
9.29808	94	486.145	476.916	0.883572		9.29444	94	634.601	625.709	0.964795		9.29908	94	591.502	580.848	0.974427		9.29908	94	749.302	740.196	0.924659		9.29908	94	617.647	607.928	0.928831		9.30109	94	559.116	548.754	0.871782		9.29644	94	423.425	413.763	0.877296		9.29808	94	468.896	458.972	0.913652		9.30109	94
9.39793	95	494.018	484.789	0.898159		9.3944	95	625.433	616.541	0.950659		9.39993	95	573.293	562.639	0.94388		9.39893	95	747.343	738.237	0.922212		9.39893	95	609.124	599.405	0.915809		9.40193	95	588.338	577.976	0.918205		9.3964	95	427.262	417.6	0.885432		9.39793	95	463.422	453.498	0.902755		9.40093	95
9.49878	96	485.982	476.753	0.88327		9.49436	96	627.08	618.188	0.953198		9.49978	96	574.674	564.02	0.946196		9.49978	96	755.182	746.076	0.932004		9.49878	96	610.182	600.463	0.917426		9.50178	96	586.002	575.64	0.914494		9.49636	96	430.696	421.034	0.892713		9.49778	96	468.345	458.421	0.912555		9.50078	96
9.59862	97	500.772	491.543	0.910672		9.59431	97	632.28	623.388	0.961216		9.59962	97	556.936	546.282	0.916439		9.59962	97	745.299	736.193	0.919658		9.59862	97	626.228	616.509	0.941942		9.60163	97	579.204	568.842	0.903695		9.59631	97	436.914	427.252	0.905897		9.59962	97	457.638	447.714	0.891241		9.60062	97
9.69847	98	486.171	476.942	0.883621		9.69527	98	608.635	599.743	0.924758		9.69947	98	570.613	559.959	0.939384		9.69747	98	743.06	733.954	0.916861		9.69847	98	600.69	590.971	0.902923		9.70147	98	597.275	586.913	0.932403		9.69627	98	427.795	418.133	0.886562		9.69747	98	453.438	443.514	0.882881		9.70047	98
9.79832	99	486.935	477.706	0.885036		9.79523	99	627.332	618.44	0.953587		9.79932	99	583.695	573.041	0.96133		9.79932	99	752.257	743.151	0.92835		9.79932	99	619.468	609.749	0.931613		9.80132	99	577.882	567.52	0.901594		9.79623	99	426.182	416.52	0.883142		9.79832	99	476.912	466.988	0.929609		9.80132	99
9.89816	100	495.36	486.131	0.900645		9.89518	100	618.42	609.528	0.939845		9.89916	100	574.822	564.168	0.946445		9.89916	100	747.016	737.91	0.921803		9.89916	100	617.324	607.605	0.928338		9.90216	100	563.946	553.584	0.879455		9.89618	100	433.918	424.256	0.899545		9.89816	100	478.708	468.784	0.933184		9.90116	100
9.99801	101	478.871	469.642	0.870096		9.99514	101	633.06	624.168	0.962419		10	101	577.04	566.386	0.950166		10	101	754.58	745.474	0.931252		9.99901	101	628.292	618.573	0.945095		10.002	101	583.915	573.553	0.911179		9.99614	101	431.927	422.265	0.895323		9.99801	101	470.187	460.263	0.916222		10.001	101
10.0989	102	477.567	468.338	0.86768		10.0951	102	617.357	608.465	0.938206		10.0999	102	589.404	578.75	0.970907		10.0999	102	740.065	730.959	0.91312		10.0989	102	624.817	615.098	0.939786		10.1019	102	575.089	564.727	0.897157		10.0971	102	429.15	419.488	0.889435		10.0979	102	469.57	459.646	0.914994		10.1009	102
10.1987	103	498.74	489.511	0.906907		10.1931	103	636.264	627.372	0.967359		10.1997	103	558.508	547.854	0.919076		10.1997	103	759.556	750.45	0.937468		10.1977	103	617.869	608.15	0.92917		10.2007	103	572.656	562.294	0.893292		10.1971	103	425.998	416.336	0.882752		10.1977	103	466.438	456.514	0.908759		10.2007	103
10.2985	104	469.016	459.787	0.851838		10.295	104	629.222	620.33	0.956501		10.2995	104	563.782	553.128	0.927924		10.2995	104	743.507	734.401	0.91742		10.2995	104	635.577	625.858	0.956226		10.3015	104	584.122	573.76	0.911508		10.295	104	423.786	414.124	0.878062		10.2985	104	457.921	447.997	0.891805		10.3015	104
10.3984	105	491.778	482.549	0.894009		10.395	105	644.342	635.45	0.979815		10.3994	105	592.134	581.48	0.975487		10.3994	105	740.08	730.974	0.913139		10.3994	105	619.094	609.375	0.931042		10.4004	105	560.506	550.144	0.87399		10.397	105	424.262	414.6	0.879071		10.3984	105	443.271	433.347	0.862642		10.4014	105
10.4982	106	483.423	474.194	0.878529		10.4939	106	627.327	618.435	0.953579		10.5002	106	568.023	557.369	0.935039		10.5002	106	749.798	740.692	0.925279		10.4972	106	610.164	600.445	0.917398		10.5022	106	583.802	573.44	0.910999		10.4969	106	423.708	414.046	0.877896		10.4982	106	463.375	453.451	0.902662		10.5012	106
10.5991	107	474.615	465.386	0.862211		10.5949	107	642.366	633.474	0.976768		10.6001	107	573.469	562.815	0.944175		10.6001	107	747.094	737.988	0.921901		10.5991	107	608.513	598.794	0.914876		10.6021	107	568.858	558.496	0.887258		10.5969	107	434.956	425.294	0.901745		10.5981	107	464.669	454.745	0.905238		10.6011	107
10.6969	108	477.878	468.649	0.868256		10.6948	108	641.424	632.532	0.975316		10.6979	108	596.185	585.531	0.982283		10.6979	108	732.034	722.928	0.903088		10.6979	108	621.439	611.72	0.934625		10.7009	108	568.372	558.01	0.886486		10.6968	108	427.566	417.904	0.886077		10.6979	108	464.059	454.135	0.904023		10.7009	108
10.7988	109	477.644	468.415	0.867823		10.7948	109	632.367	623.475	0.961351		10.7998	109	574.322	563.668	0.945606		10.7998	109	749.012	739.906	0.924297		10.7998	109	620.62	610.901	0.933373		10.8018	109	575.74	565.378	0.898192		10.7958	109	429.204	419.542	0.88955		10.7988	109	474.091	464.167	0.923993		10.7998	109
10.8976	110	474.112	464.883	0.861279		10.8958	110	632.775	623.883	0.96198		10.8996	110	572.948	562.294	0.943301		10.8996	110	744.265	735.159	0.918367		10.8976	110	638.273	628.554	0.960345		10.9006	110	566.629	556.267	0.883717		10.8968	110	438.638	428.976	0.909552		10.8986	110	465.731	455.807	0.907352		10.9016	110
10.9975	111	477.117	467.888	0.866846		10.9937	111	640.523	631.631	0.973927		10.9985	111	564.686	554.032	0.929441		11.0005	111	749.19	740.084	0.924519		10.9975	111	618.793	609.074	0.930582		11.0025	111	568.124	557.762	0.886092		10.9967	111	440.139	430.477	0.912735		10.9965	111	487.623	477.699	0.950931		11.0015	111
11.0993	112	466.754	457.525	0.847647		11.0957	112	623.711	614.819	0.948004		11.1003	112	564.56	553.906	0.929229		11.1003	112	756.848	747.742	0.934086		11.0993	112	616.643	606.924	0.927297		11.1023	112	574.087	563.725	0.895566		11.0957	112	431.398	421.736	0.894201		11.0983	112	481.566	471.642	0.938874		11.1003	112
11.1992	113	480.104	470.875	0.87238		11.1936	113	622.273	613.381	0.945786		11.1982	113	578.289	567.635	0.952261		11.1982	113	731.226	722.12	0.902078		11.1982	113	611.111	601.392	0.918845		11.2012	113	574.551	564.189	0.896303		11.1966	113	435.104	425.442	0.902059		11.1982	113	470.478	460.554	0.916801		11.2012	113
11.299	114	473.09	463.861	0.859386		11.2956	114	624.701	615.809	0.94953		11.3	114	574.051	563.397	0.945151		11.3	114	743.291	734.185	0.91715		11.3	114	627.721	618.002	0.944223		11.302	114	569.998	559.636	0.88907		11.2956	114	444.905	435.243	0.92284		11.297	114	466.009	456.085	0.907905		11.3	114
11.3979	115	458.088	448.859	0.831592		11.3935	115	624.308	615.416	0.948924		11.3989	115	581.274	570.62	0.957269		11.3989	115	748.03	738.924	0.92307		11.3979	115	613.241	603.522	0.922099		11.4009	115	585.361	574.999	0.913476		11.3955	115	420.28	410.618	0.870628		11.3989	115	482.062	472.138	0.939861		11.4019	115
11.4977	116	471.84	462.611	0.85707		11.4935	116	651.716	642.824	0.991185		11.4987	116	565.589	554.935	0.930955		11.5007	116	749.894	740.788	0.925399		11.4977	116	630.423	620.704	0.948351		11.5027	116	553.164	542.802	0.862326		11.4955	116	431.758	422.096	0.894965		11.4987	116	474.565	464.641	0.924937		11.5017	116
11.5976	117	467.911	458.682	0.849791		11.5944	117	649.541	640.649	0.987832		11.6006	117	572.094	561.44	0.941868		11.5986	117	745.554	736.448	0.919977		11.5986	117	623.229	613.51	0.93736		11.6006	117	570.68	560.318	0.890153		11.5954	117	437.498	427.836	0.907135		11.5986	117	464.957	455.033	0.905811		11.6006	117
11.6974	118	472.97	463.741	0.859163		11.6944	118	621.998	613.106	0.945362		11.6984	118	551.71	541.056	0.907672		11.6984	118	745.542	736.436	0.919962		11.6984	118	622.532	612.813	0.936295		11.7014	118	575.549	565.187	0.897888		11.6954	118	432.141	422.479	0.895777		11.6984	118	475.319	465.395	0.926438		11.7014	118
11.7992	119	469.807	460.578	0.853303		11.7944	119	636.59	627.698	0.967862		11.8002	119	579.974	569.32	0.955088		11.7992	119	741.183	732.077	0.914517		11.7982	119	607.122	597.403	0.91275		11.8022	119	566.676	556.314	0.883792		11.7954	119	420.48	410.818	0.871052		11.7972	119	464.244	454.32	0.904392		11.8002	119
11.8991	120	475.557	466.328	0.863956		11.8943	120	639.806	630.914	0.972821		11.8991	120	580.856	570.202	0.956567		11.8991	120	753.875	744.769	0.930372		11.8981	120	628.275	618.556	0.945069		11.9011	120	559.054	548.692	0.871683		11.8973	120	433.77	424.108	0.899231		11.8991	120	465.82	455.896	0.907529		11.9001	120
11.9979	121	477.599	468.37	0.867739		11.9943	121	649.679	640.787	0.988044		11.9989	121	567.789	557.135	0.934646		12.0009	121	758.044	748.938	0.93558		11.9979	121	623.464	613.745	0.937719		12.0009	121	563.255	552.893	0.878357		11.9963	121	431.919	422.257	0.895306		11.9969	121	478.633	468.709	0.933035		11.9999	121
12.0998	122	484.099	474.87	0.879782		12.0942	122	630.919	622.027	0.959118		12.0988	122	577.268	566.614	0.950548		12.0988	122	769.814	760.708	0.950283		12.0978	122	617.272	607.553	0.928258		12.1008	122	564.311	553.949	0.880035		12.0962	122	423.516	413.854	0.877489		12.0988	122	476.025	466.101	0.927843		12.1008	122
12.1976	123	480.96	471.731	0.873966		12.1942	123	629.056	620.164	0.956245		12.1986	123	571.224	560.57	0.940409		12.1986	123	759.963	750.857	0.937977		12.1986	123	624.445	614.726	0.939217		12.2006	123	564.224	553.862	0.879897		12.1962	123	420.325	410.663	0.870724		12.1976	123	475.38	465.456	0.926559		12.2006	123
12.2975	124	479.587	470.358	0.871423		12.2941	124	624.209	615.317	0.948772		12.2995	124	573.332	562.678	0.943945		12.2995	124	752.25	743.144	0.928342		12.2985	124	625.114	615.395	0.94024		12.3015	124	570.542	560.18	0.889934		12.2961	124	419.623	409.961	0.869235		12.2975	124	471.604	461.68	0.919043		12.3005	124
12.3983	125	469.207	459.978	0.852192		12.3941	125	630.346	621.454	0.958234		12.3993	125	568.218	557.564	0.935366		12.3993	125	762.655	753.549	0.94134		12.3983	125	618.071	608.352	0.929479		12.4013	125	565.836	555.474	0.882458		12.3981	125	431.758	422.096	0.894965		12.3973	125	469.667	459.743	0.915187		12.4003	125
12.4982	126	478.775	469.546	0.869918		12.4941	126	637.303	628.411	0.968962		12.4992	126	578.773	568.119	0.953073		12.5012	126	754.381	745.275	0.931004		12.4982	126	631.696	621.977	0.950296		12.5012	126	563.409	553.047	0.878602		12.4961	126	415.154	405.492	0.85976		12.4972	126	464.149	454.225	0.904202		12.5002	126
12.598	127	489.451	480.222	0.889697		12.594	127	630.255	621.363	0.958094		12.599	127	578.358	567.704	0.952377		12.599	127	752.966	743.86	0.929236		12.598	127	608.16	598.441	0.914336		12.601	127	564.359	553.997	0.880111		12.596	127	425.236	415.574	0.881136		12.599	127	462.39	452.466	0.900701		12.6	127
12.6979	128	489.56	480.331	0.889899		12.694	128	624.57	615.678	0.949328		12.6989	128	574.092	563.438	0.94522		12.6989	128	746.7	737.594	0.921409		12.6989	128	618.73	609.011	0.930486		12.7009	128	588.604	578.242	0.918628		12.696	128	421.33	411.668	0.872854		12.6979	128	482.976	473.052	0.94168		12.7009	128
12.7977	129	479.056	469.827	0.870439		12.7949	129	640.099	631.207	0.973273		12.7997	129	567.585	556.931	0.934304		12.7987	129	756.177	747.071	0.933247		12.7987	129	599.097	589.378	0.900489		12.8017	129	587.037	576.675	0.916139		12.7959	129	440.984	431.322	0.914527		12.7977	129	476.951	467.027	0.929687		12.8007	129
12.8986	130	487.38	478.151	0.88586		12.8949	130	634.416	625.524	0.96451		12.8996	130	567.109	556.455	0.933505		12.8996	130	735.501	726.395	0.907419		12.8986	130	612.308	602.589	0.920674		12.9016	130	578.794	568.432	0.903043		12.8959	130	431.516	421.854	0.894452		12.8976	130	469.815	459.891	0.915481		12.9006	130
12.9984	131	479.168	469.939	0.870646		12.9948	131	643.813	634.921	0.978999		12.9994	131	583.662	573.008	0.961275		12.9994	131	761.924	752.818	0.940427		12.9984	131	603.733	594.014	0.907572		13.0014	131	584.545	574.183	0.91218		12.9958	131	417.296	407.634	0.864301		12.9974	131	484.152	474.228	0.944021		13.0004	131
13.0982	132	490.983	481.754	0.892536		13.0948	132	627.488	618.596	0.953828		13.0992	132	571.312	560.658	0.940556		13.0992	132	749.249	740.143	0.924593		13.0982	132	613.518	603.799	0.922522		13.1012	132	578.854	568.492	0.903139		13.0958	132	424.919	415.257	0.880464		13.0982	132	484.524	474.6	0.944762		13.1002	132
13.1981	133	484.383	475.154	0.880308		13.1948	133	640.917	632.025	0.974534		13.1991	133	564.378	553.724	0.928924		13.1991	133	745.515	736.409	0.919928		13.1991	133	631.374	621.655	0.949804		13.2011	133	574.231	563.869	0.895794		13.1968	133	426.312	416.65	0.883418		13.1981	133	477.314	467.39	0.930409		13.2011	133
13.2979	134	466.751	457.522	0.847642		13.2947	134	630.378	621.486	0.958284		13.2999	134	562.423	551.769	0.925644		13.2989	134	756.22	747.114	0.933301		13.2989	134	619.894	610.175	0.932264		13.3019	134	592	581.638	0.924023		13.2967	134	423.431	413.769	0.877309		13.2979	134	485.666	475.742	0.947035		13.3009	134
13.3988	135	474.1	464.871	0.861257		13.3947	135	640.538	631.646	0.97395		13.3998	135	569.129	558.475	0.936894		13.3998	135	751.158	742.052	0.926978		13.3988	135	620.156	610.437	0.932664		13.4018	135	569.967	559.605	0.88902		13.3967	135	419.525	409.863	0.869027		13.3978	135	485.795	475.871	0.947292		13.4008	135
13.4986	136	482.627	473.398	0.877055		13.4936	136	637.483	628.591	0.969239		13.4996	136	566.802	556.148	0.93299		13.4996	136	754.394	745.288	0.93102		13.4976	136	619.933	610.214	0.932324		-1099.56	136	581.115	570.753	0.906731		13.4966	136	433.937	424.275	0.899585		13.4976	136	470.254	460.33	0.916355		13.5006	136
13.5985	137	499.172	489.943	0.907707		13.5946	137	630.709	621.817	0.958794		13.5995	137	557.105	546.451	0.916723		13.5995	137	750.19	741.084	0.925768		13.5985	137	602.13	592.411	0.905123		13.6015	137	567.146	556.784	0.884539		13.5966	137	438.631	428.969	0.909538		13.5975	137	491.969	482.045	0.959582		13.6005	137
13.6983	138	483.052	473.823	0.877842		13.6945	138	618.441	609.549	0.939878		13.6993	138	562.678	552.024	0.926072		13.6993	138	724.33	715.224	0.893464		13.6993	138	607.559	597.84	0.913418		13.7013	138	579.286	568.924	0.903825		13.6965	138	435.801	426.139	0.903537		13.6983	138	488.344	478.42	0.952366		13.7013	138
13.7982	139	481.165	471.936	0.874346		13.7945	139	623.144	614.252	0.947129		13.7992	139	578.305	567.651	0.952288		13.7992	139	747.923	738.817	0.922936		13.7992	139	612.979	603.26	0.921699		13.8022	139	586.624	576.262	0.915483		13.7965	139	426.918	417.256	0.884703		13.7982	139	477.748	467.824	0.931273		13.8012	139
13.899	140	476.327	467.098	0.865383		13.8944	140	611.457	602.565	0.929109		13.9	140	565.381	554.727	0.930607		13.9	140	759.613	750.507	0.93754		13.899	140	621.775	612.056	0.935138		13.902	140	566.653	556.291	0.883755		13.8965	140	435.023	425.361	0.901888		13.898	140	483.069	473.145	0.941865		13.901	140
13.9989	141	471.839	462.61	0.857068		13.9934	141	638.934	630.042	0.971476		13.9999	141	563.778	553.124	0.927917		13.9999	141	751.648	742.542	0.92759		13.9979	141	621.558	611.839	0.934807		14.0019	141	582.314	571.952	0.908635		13.9964	141	410.199	400.537	0.849254		13.9979	141	464.409	454.485	0.90472		14.0009	141
14.0987	142	460.949	451.72	0.836892		14.0954	142	639.771	630.879	0.972767		14.0997	142	565.988	555.334	0.931625		14.0997	142	746.429	737.323	0.92107		14.0987	142	608.086	598.367	0.914223		14.1017	142	581.042	570.68	0.906615		14.0964	142	430.589	420.927	0.892486		14.0977	142	486.046	476.122	0.947792		14.1007	142
14.1986	143	469.04	459.811	0.851882		14.1953	143	635.402	626.51	0.96603		14.1996	143	567.217	556.563	0.933687		14.1996	143	736.213	727.107	0.908308		14.1996	143	611.71	601.991	0.91976		14.2006	143	572.73	562.368	0.89341		14.1963	143	427.682	418.02	0.886322		14.1986	143	473.691	463.767	0.923197		14.2016	143
[truncated: 57 more rows]
[truncated: 12 more columns]

## Sheet: 4J 3hUV
Cell 00						Cell 01						Cell 02						Cell 03						Cell 04						Cell 05						Cell 06						Cell 07						Cell 08
[truncated: 204 more rows]
[truncated: 12 more columns]

[truncated: 13 more sheets: 4J 16hUV, 4J 24hUV, 4J diff, 8J 1hUV, 8J 3hUV, 8J 16hUV, 8J 24hUV, 8J diff, 16J 1hUV, 16J 3hUV, 16J 16hUV, 16J 24hUV, 16J diff]
