# Supplementary material for: XAB2 dynamics during DNA damage-dependent transcription inhibition
Source: eLife. 2022 Jul 26;11:e77094. doi: 10.7554/eLife.77094 (PMC9436415; doi:10.7554/eLife.77094)
Supplement: Figure 4—source data 2. [file elife-77094-fig4-data2.xlsx]

## Sheet: Difference
DATA															DATA compared to MRC5 NoVU															VARIANCE															VARIANCE compared to MRC5 NoUV
															0	3.51774	0.409879	1.28153		-2.09067	3.28012	6.08473	6.39685		-2.57811	3.00706	6.98629	6.43585																	0	-0.0268574	0.0177715	-0.0363491
																																													0	0.163882	0.13331	0.190655
MRC5					CSA					CSB					MRC5					CSA					CSB					MRC5					CSA					CSB					MRC5
NoUV	3h	16h	24h		NoUV	3h	16h	24h		NoUV	3h	16h	24h		NoUV	3h	16h	24h		NoUV	3h	16h	24h		NoUV	3h	16h	24h		NoUV	3h	16h	24h		NoUV	3h	16h	24h		NoUV	3h	16h	24h		NoUV	3h	16h	24h
1.0801	1.07207	1.07994	1.05964		1.0919	1.0831	1.0477	1.03799		1.08932	1.084	1.03649	1.02782		0	-0.00803604	-0.000162775	-0.0204635		0.0117932	0.00299487	-0.0324081	-0.0421094		0.00921543	0.00390035	-0.043611	-0.0522848		0.000942496	0.000277323	0.000394029	0.000416597		0.00170798	0.000812413	0.000786522	0.000804756		0.000869905	0.00096957	0.000393192	0.00061938		0	-0.000665173	-0.000548467	-0.000525899
1.06943	1.04486	1.05858	1.03897		1.05303	1.05252	1.0306	1.03134		1.07113	1.05301	1.01773	1.02714		0	-0.0245705	-0.0108556	-0.0304566		-0.0164062	-0.0169091	-0.0388333	-0.0380939		0.00169684	-0.0164215	-0.0517008	-0.0422938		0.000462038	0.000351402	0.000253077	0.000323613		0.000342629	0.000998126	0.000659252	0.000235408		0.000239486	0.000310776	0.000446912	0.000198926		0	-0.000110636	-0.000208961	-0.000138425
1.06034	1.03288	1.05213	1.01781		1.04221	1.04323	1.01424	1.02022		1.04013	1.04316	1.01359	1.01563		0	-0.0274612	-0.0082141	-0.0425334		-0.0181311	-0.0171079	-0.0461057	-0.0401192		-0.0202141	-0.0171865	-0.046755	-0.0447133		0.000421739	0.000426876	0.000376551	0.000143831		0.00112474	0.000521534	0.00073032	0.00041509		0.000780807	0.000358546	0.000486363	0.000430003		0	5.13667e-06	-4.51885e-05	-0.000277909
1.02902	1.03659	1.05044	1.02437		1.04413	1.0334	1.00892	1.02629		1.03894	1.0433	1.01456	1.01893		0	0.00757255	0.0214207	-0.00464365		0.0151165	0.00437935	-0.0200971	-0.00272889		0.0099202	0.0142792	-0.0144591	-0.0100887		0.000744352	0.000510833	0.00046865	0.000743047		0.00114232	0.00078545	0.000680003	0.000285544		0.00066032	0.00112921	0.000864282	0.000586341		0	-0.000233519	-0.000275702	-1.30494e-06
1.03149	1.03683	1.0451	1.02046		1.02866	1.02869	1.01137	1.01545		1.02423	1.02457	1.00823	1.02383		0	0.00534008	0.0136096	-0.011025		-0.00282326	-0.00279351	-0.0201114	-0.0160388		-0.00726006	-0.00691244	-0.0232558	-0.00765725		0.000707917	0.000259992	0.000408357	0.000783473		0.00117729	0.000536128	0.00100965	0.000229335		0.00106739	0.000421705	0.000254326	0.000230841		0	-0.000447925	-0.00029956	7.55558e-05
1.02208	1.0183	1.02371	1.01335		1.0294	1.02128	1.01528	1.00924		1.03023	1.02158	1.00665	1.01883		0	-0.00377653	0.00162979	-0.00873164		0.00731646	-0.0008019	-0.00680083	-0.0128436		0.00815262	-0.000502885	-0.0154349	-0.00324895		0.000503683	0.000367714	0.000346052	0.000248239		0.00059375	0.000993681	0.000143436	0.000264854		0.00149723	0.00031431	0.000255847	0.000887558		0	-0.000135969	-0.000157631	-0.000255444
1.01957	1.00369	1.02422	1.02037		1.02427	1.0071	1.00332	1.01387		1.02057	1.00345	1.01158	1.0132		0	-0.0158777	0.00465356	0.000803608		0.00469855	-0.0124696	-0.016245	-0.00569315		0.00100699	-0.0161149	-0.00798386	-0.00636478		0.000619598	0.000326475	0.000574201	0.000284811		0.000286661	0.000377855	0.00037557	0.000210335		0.000378047	0.00096273	0.000699463	0.000446194		0	-0.000293123	-4.5397e-05	-0.000334787
1.01702	1.01805	1.02178	1.01119		1.02061	1.00454	1.00033	1.00051		1.02126	1.01141	1.02205	1.0272		0	0.00103332	0.00476368	-0.00583079		0.00359442	-0.012478	-0.0166899	-0.0165014		0.00424491	-0.00560806	0.00503537	0.0101879		0.000583168	0.00061723	0.000530402	0.000228002		0.000666233	0.000497389	0.000249323	7.75356e-05		0.000587241	0.000851031	0.0013488	0.000780956		0	3.40619e-05	-5.27657e-05	-0.000355166
1.00342	1.02206	1.01794	1.00886		1.01121	1.01181	0.996927	0.998189		1.02325	1.00959	1.01172	1.00866		0	0.0186342	0.014522	0.00544166		0.00778598	0.00838766	-0.00649536	-0.00523362		0.0198243	0.00616539	0.00829412	0.00523902		0.000495658	0.000339017	0.000195356	0.00032539		0.000538012	0.00152544	0.000144803	0.000202927		0.00068402	0.000169765	0.000340174	0.000209383		0	-0.000156642	-0.000300302	-0.000170268
1.00132	1.0197	1.00745	1.00791		1.00608	1.01882	1.01271	1.01073		0.990843	1.00358	1.00742	1.00143		0	0.0183763	0.00612833	0.00659564		0.00475744	0.0174982	0.0113876	0.00941089		-0.0104762	0.00226004	0.00610301	0.00011407		0.000324238	0.000442565	0.000618681	0.000247975		0.000342743	0.00178966	0.000194933	0.000287555		0.0005589	0.000441565	0.000382635	0.000211359		0	0.000118326	0.000294442	-7.62634e-05
1.00203	1.01345	1.00652	0.99959		1.00125	1.00186	0.992963	1.00671		0.988339	1.00914	1.01054	1.0031		0	0.0114127	0.00448387	-0.00244283		-0.000787724	-0.000173527	-0.00907027	0.00467505		-0.0136946	0.00710478	0.00851176	0.00107074		0.000453372	0.000103165	0.000401153	6.77779e-05		0.000681449	0.000604033	0.000360045	0.000139845		0.000168358	9.0794e-05	0.000486246	0.000663996		0	-0.000350207	-5.2219e-05	-0.000385594
1.0148	1.00746	1.00322	0.996683		1.00392	1.01585	1.00476	0.999598		1.01355	0.991758	1.00946	1.01002		0	-0.00733385	-0.0115765	-0.0181146		-0.0108793	0.00105014	-0.0100421	-0.0151993		-0.00125202	-0.0230396	-0.00533429	-0.00477647		0.000500529	0.000120828	0.000145214	0.000235444		0.000440918	0.000607823	0.000162069	0.000277793		0.00113708	0.000645201	0.000127455	0.000344509		0	-0.000379701	-0.000355315	-0.000265085
1.00476	0.995202	0.999989	1.01352		0.99831	0.994253	1.0006	0.997852		0.995416	1.00678	1.00103	0.990511		0	-0.0095587	-0.00477205	0.00875753		-0.00645091	-0.0105078	-0.00416111	-0.00690892		-0.00934485	0.00201436	-0.00373544	-0.0142501		0.000172439	0.000417576	0.000157932	6.25431e-05		0.000346799	0.000378131	0.00032744	0.000150159		0.000448833	0.000591271	0.000252735	0.000166245		0	0.000245137	-1.45075e-05	-0.000109896
1.00017	1.00231	0.99948	1.01011		0.993528	1.0051	1.00205	0.99846		1.00389	1.00205	0.99683	1.01201		0	0.00213949	-0.000693639	0.0099401		-0.00664586	0.00492449	0.0018786	-0.00171344		0.00371871	0.00187162	-0.00334393	0.0118314		0.000297148	0.000129888	0.000185034	0.000117623		0.000844448	0.00047435	0.000279381	0.000270196		0.000625254	0.000455865	0.00023542	0.000220152		0	-0.000167261	-0.000112114	-0.000179525
1.00827	0.995323	1.00231	1.00503		1.00667	1.00116	1.00959	1.00899		0.997655	0.999672	1.00234	1.00548		0	-0.0129425	-0.00595701	-0.00323499		-0.00159919	-0.00710971	0.00132789	0.000727584		-0.0106099	-0.00859255	-0.00592166	-0.00278765		0.000273501	0.000222258	0.00013418	0.000257222		0.000424545	0.000490343	0.000187999	0.000361382		0.00047856	0.000436256	0.00024471	0.000162465		0	-5.12433e-05	-0.000139321	-1.62793e-05
0.992553	1.00226	0.994393	0.990631		0.994976	0.981263	0.996177	1.00535		0.993702	0.995073	0.993439	0.988678		0	0.00970854	0.0018399	-0.00192247		0.00242227	-0.01129	0.00362308	0.0128004		0.0011488	0.0025193	0.000885509	-0.00387517		0.000492548	0.000177324	0.000353643	0.000214744		0.000289912	0.000676831	0.000225222	0.000375404		0.000238626	0.000340046	0.000249727	0.000364559		0	-0.000315223	-0.000138905	-0.000277803
0.996518	0.993421	1.00094	0.996687		0.999759	0.990255	0.997559	0.994992		1	0.986782	0.998508	1.00327		0	-0.00309699	0.00441767	0.000169396		0.00324128	-0.00626311	0.0010411	-0.00152592		0.0034849	-0.00973542	0.00199057	0.00675578		0.00068761	0.000214346	0.000164366	0.000175008		0.000745313	0.000536375	0.000133519	0.000140708		0.000342009	0.0003346	0.000171446	0.000369008		0	-0.000473264	-0.000523243	-0.000512601
0.993593	1.00542	0.99285	0.997431		0.997796	1.0036	1.00077	0.998087		0.996843	1.00257	0.998056	0.995047		0	0.0118269	-0.000743152	0.00383757		0.0042024	0.0100057	0.00717185	0.00449405		0.00325028	0.00897628	0.0044628	0.00145369		0.000217659	0.000278534	0.000329526	0.000112421		0.000307284	0.000888163	0.000786384	0.000289598		0.00091485	0.000165736	0.000238413	0.000394823		0	6.08747e-05	0.000111867	-0.000105238
0.995779	0.993816	1.00187	0.998007		0.997856	1.01278	1.00106	1.0004		1.00459	0.999805	0.995038	0.991046		0	-0.0019631	0.00608754	0.00222832		0.00207722	0.0169968	0.00528202	0.00462003		0.00881518	0.00402587	-0.000740591	-0.00473279		0.000136623	0.000278518	0.000257869	2.39411e-05		0.000243259	0.000529954	0.000185324	0.000190904		0.000526921	0.000805445	0.000394873	0.000458146		0	0.000141895	0.000121246	-0.000112681
0.991527	0.991334	0.99844	0.992309		1.00595	0.993894	0.994476	0.989557		1.00601	1.00638	0.994752	1.00084		0	-0.000192545	0.00691341	0.000781989		0.0144198	0.00236705	0.00294893	-0.00196961		0.0144835	0.0148553	0.00322526	0.00931061		0.000163385	0.000337629	4.01237e-05	0.000264509		0.000974208	0.000627439	0.000150622	0.000247779		0.000387652	0.000277714	0.000284477	0.000521824		0	0.000174244	-0.000123262	0.000101124
0.685121	0.701645	0.672525	0.692148		0.653192	0.672839	0.756536	0.787989		0.628499	0.678918	0.820946	0.815336		0	0.0165235	-0.0125961	0.00702677		-0.0319291	-0.0122816	0.0714152	0.102868		-0.0566224	-0.00620339	0.135825	0.130215		0.00145691	0.000521823	0.000606695	0.000449849		0.000370696	0.00596957	0.00168361	0.00249354		0.00166825	0.00067036	0.00200876	0.00524035		0	-0.000935091	-0.000850219	-0.00100707
0.73523	0.769368	0.735985	0.747173		0.720383	0.738312	0.824202	0.859036		0.686379	0.747401	0.886086	0.865642		0	0.0341373	0.000754099	0.0119425		-0.0148471	0.00308181	0.0889716	0.123806		-0.0488519	0.0121701	0.150855	0.130412		0.00106949	0.000265135	0.00122867	0.000936805		0.00105976	0.00686606	0.0015654	0.00233345		0.000937117	0.000443248	0.0010701	0.00167873		0	-0.000804358	0.000159181	-0.000132688
0.768818	0.805631	0.77808	0.783561		0.749036	0.77183	0.859537	0.887167		0.741688	0.78155	0.907633	0.904711		0	0.0368127	0.00926131	0.0147432		-0.0197826	0.00301177	0.0907184	0.118349		-0.0271303	0.0127321	0.138814	0.135893		0.00113127	0.000374073	0.000543401	0.000777775		0.000428136	0.00445673	0.0014288	0.00285659		0.00128118	0.000867248	0.00281672	0.00225466		0	-0.000757197	-0.000587869	-0.000353495
0.786348	0.826601	0.79753	0.814891		0.787646	0.80472	0.884174	0.903647		0.761532	0.806151	0.926937	0.907795		0	0.0402535	0.0111829	0.0285433		0.0012987	0.0183724	0.0978265	0.117299		-0.0248151	0.0198033	0.14059	0.121448		0.0011007	0.000490684	0.000593359	0.000688351		0.000320909	0.00416913	0.000877552	0.00229377		0.0012668	0.000629377	0.00198967	0.00258965		0	-0.000610016	-0.000507341	-0.000412349
0.807365	0.84914	0.814643	0.824197		0.802508	0.813677	0.907392	0.91656		0.772491	0.817874	0.93026	0.924432		0	0.0417752	0.00727839	0.0168319		-0.00485674	0.00631252	0.100027	0.109195		-0.0348735	0.010509	0.122895	0.117067		0.000813888	0.000585625	0.000914705	0.000671445		0.00063332	0.00299016	0.000884566	0.0013199		0.0019714	0.0003229	0.00182684	0.00222016		0	-0.000228262	0.000100817	-0.000142443
0.818774	0.865267	0.828017	0.839065		0.802974	0.845877	0.914066	0.922085		0.785363	0.843086	0.934983	0.930329		0	0.0464932	0.00924346	0.020291		-0.0157998	0.0271037	0.0952919	0.103311		-0.0334108	0.0243124	0.116209	0.111556		0.000960861	0.000976683	0.000762586	0.000887021		0.000305375	0.00287364	0.000671386	0.00161047		0.00109827	0.00100206	0.00162694	0.00114429		0	1.58221e-05	-0.000198275	-7.38404e-05
0.829126	0.876588	0.833579	0.853063		0.829233	0.855948	0.922552	0.941892		0.79428	0.851966	0.946043	0.951589		0	0.0474614	0.00445283	0.0239369		0.000106801	0.0268218	0.0934262	0.112766		-0.0348466	0.0228395	0.116917	0.122463		0.000464422	0.000456023	0.000825753	0.000758756		0.0011158	0.00270811	0.000895645	0.00209501		0.000926693	0.00127261	0.00173196	0.00143293		0	-8.39958e-06	0.000361331	0.000294334
0.837746	0.894355	0.851813	0.855489		0.816877	0.866175	0.931498	0.931		0.809424	0.862812	0.94515	0.934139		0	0.0566093	0.0140675	0.0177432		-0.0208685	0.0284293	0.0937528	0.093255		-0.0283214	0.0250664	0.107404	0.0963931		0.000640555	0.000414771	0.000588294	0.000677022		0.000794804	0.00334452	0.000812102	0.00142121		0.000949246	0.000387662	0.000844069	0.00144515		0	-0.000225784	-5.22613e-05	3.64667e-05
0.851006	0.880167	0.84797	0.86425		0.820012	0.859064	0.930548	0.946542		0.80944	0.89015	0.962075	0.949504		0	0.0291609	-0.00303561	0.0132446		-0.0309933	0.00805875	0.0795426	0.0955361		-0.0415653	0.0391442	0.111069	0.0984982		0.000384315	0.000560308	0.000811383	0.000437851		0.00102789	0.00368554	0.000739386	0.00175441		0.00094879	0.00104064	0.00118941	0.000737233		0	0.000175993	0.000427069	5.35368e-05
0.849328	0.900814	0.858161	0.867895		0.839407	0.87904	0.936087	0.949377		0.829804	0.8812	0.943624	0.9502		0	0.0514867	0.00883379	0.0185669		-0.00992103	0.0297126	0.0867592	0.10005		-0.0195233	0.0318728	0.0942965	0.100872		0.000760494	0.000683793	0.00109074	0.000239926		0.000273687	0.00191003	0.00125261	0.000998368		0.0012371	0.000992596	0.00113361	0.000876245		0	-7.67003e-05	0.000330246	-0.000520568
0.85159	0.899218	0.870269	0.872029		0.847072	0.873815	0.933964	0.955331		0.833979	0.889091	0.962203	0.951878		0	0.0476285	0.0186797	0.0204397		-0.00451791	0.022225	0.0823747	0.103742		-0.0176107	0.0375015	0.110614	0.100288		0.000650519	0.000334948	0.000918582	0.000163462		0.000925862	0.00213788	0.000621331	0.00124665		0.000237298	0.00072629	0.0014231	0.00122087		0	-0.000315572	0.000268063	-0.000487057
0.873753	0.901029	0.881131	0.884612		0.846755	0.88686	0.950372	0.950103		0.843725	0.892783	0.959742	0.953968		0	0.0272763	0.0073779	0.0108596		-0.0269981	0.0131074	0.0766188	0.0763498		-0.0300275	0.0190301	0.0859894	0.0802154		0.000470502	0.000721598	0.000855473	0.000338496		0.000408725	0.00295531	0.000520739	0.00102511		0.00106494	0.000623434	0.000581089	0.00122131		0	0.000251096	0.000384971	-0.000132006
0.870994	0.912577	0.871102	0.876251		0.854095	0.882531	0.943755	0.944284		0.841253	0.893547	0.942353	0.953603		0	0.0415831	0.000107977	0.00525658		-0.0168993	0.011537	0.0727611	0.0732896		-0.0297409	0.0225528	0.071359	0.0826086		0.000428541	0.000532682	0.000935169	0.000411022		0.000650466	0.00171064	0.0011854	0.000832459		0.000692983	0.000620078	0.000378167	0.00046772		0	0.000104141	0.000506628	-1.75186e-05
0.872206	0.903402	0.870425	0.890418		0.85446	0.907701	0.947855	0.956553		0.845901	0.898259	0.951738	0.949344		0	0.0311956	-0.00178116	0.0182114		-0.0177465	0.0354945	0.0756487	0.0843464		-0.0263049	0.0260527	0.0795317	0.0771373		0.00127324	0.000180645	0.0010596	0.000408501		0.000477	0.00381774	0.000825245	0.000668524		0.000640721	0.000619345	0.000456001	0.00101525		0	-0.00109259	-0.000213639	-0.000864736
0.877388	0.911531	0.883104	0.886638		0.851041	0.898909	0.95142	0.951957		0.843724	0.8994	0.947285	0.958563		0	0.0341431	0.00571569	0.00925011		-0.0263474	0.0215212	0.0740318	0.0745692		-0.0336644	0.0220116	0.0698968	0.0811748		0.000604579	0.000319015	0.00118141	0.000557079		0.0011763	0.00162724	0.000591881	0.000483386		0.000327622	0.00110211	0.000881753	0.00115927		0	-0.000285564	0.000576834	-4.74995e-05
0.870111	0.90813	0.88083	0.888502		0.866104	0.9008	0.955874	0.952464		0.867961	0.91123	0.96809	0.951323		0	0.0380189	0.0107191	0.0183906		-0.00400679	0.0306893	0.0857632	0.0823528		-0.00215002	0.0411188	0.0979784	0.0812122		0.000663985	0.000404222	0.00104437	0.000428266		0.00053734	0.00231932	0.000760224	0.000662767		0.00061172	0.000563018	0.000325088	0.000955726		0	-0.000259763	0.000380384	-0.000235719
0.880666	0.908944	0.8857	0.892461		0.848006	0.910574	0.952294	0.953261		0.8669	0.91347	0.971262	0.963257		0	0.0282779	0.00503367	0.0117944		-0.0326598	0.0299075	0.0716281	0.0725951		-0.013766	0.0328038	0.0905954	0.0825909		0.0003076	0.000691896	0.000899368	0.000397224		0.000934153	0.00256283	0.00095882	0.000712936		0.00120795	0.000424972	0.000889696	0.000759771		0	0.000384296	0.000591768	8.96241e-05
0.878173	0.916288	0.896465	0.891469		0.866106	0.911234	0.956386	0.954474		0.866298	0.921042	0.966849	0.96266		0	0.0381152	0.0182922	0.0132963		-0.0120667	0.0330617	0.0782133	0.0763014		-0.0118746	0.0428691	0.0886763	0.0844876		0.000680469	0.000298424	0.00124918	0.000452153		0.000541705	0.00176052	0.000405132	0.000640076		0.000859327	0.000647163	0.000393087	0.00101421		0	-0.000382045	0.000568713	-0.000228317
0.885401	0.920559	0.885199	0.89397		0.876169	0.906015	0.9481	0.959308		0.863701	0.917519	0.972223	0.955041		0	0.0351581	-0.000201759	0.00856886		-0.00923143	0.0206138	0.0626993	0.0739072		-0.0217001	0.032118	0.0868225	0.06964		0.000840635	0.00108722	0.000757277	0.000601447		0.000813382	0.000884589	0.000829957	0.000474034		0.000909255	0.000554997	0.000321999	0.000812506		0	0.000246587	-8.33583e-05	-0.000239188
0.882619	0.930915	0.89086	0.890648		0.865335	0.917844	0.952583	0.961957		0.862064	0.914882	0.958254	0.95646		0	0.0482966	0.00824071	0.00802871		-0.0172835	0.0352252	0.069964	0.0793386		-0.0205553	0.032263	0.0756349	0.0738412		0.000389	0.000624656	0.00118467	0.000489021		0.000934501	0.00119235	0.000221691	0.00110865		0.00100282	0.00110641	0.000952091	0.00127444		0	0.000235656	0.000795671	0.000100021
0.891065	0.927215	0.899381	0.903073		0.871691	0.923685	0.955988	0.959931		0.851343	0.917859	0.960106	0.955525		0	0.0361501	0.00831629	0.0120089		-0.0193739	0.03262	0.0649236	0.0688665		-0.0397217	0.026794	0.069041	0.0644609		0.000831254	0.000314798	0.00173609	0.000269587		0.000940284	0.00189539	0.000261366	0.000704022		0.00141729	0.000544995	0.000284199	0.000699444		0	-0.000516456	0.000904836	-0.000561667
0.885568	0.92504	0.892449	0.889719		0.861655	0.919043	0.954314	0.96498		0.862894	0.927478	0.964626	0.952521		0	0.039472	0.00688112	0.00415084		-0.0239127	0.0334748	0.0687458	0.0794124		-0.0226734	0.0419104	0.0790585	0.0669532		0.00136526	0.00030908	0.000825705	0.000345715		0.00191703	0.00153582	0.000328492	0.000244652		0.000952515	0.00123829	0.0017237	0.000270987		0	-0.00105618	-0.000539558	-0.00101955
0.895305	0.93761	0.891966	0.89298		0.884855	0.924784	0.965435	0.967041		0.861609	0.91954	0.957038	0.960167		0	0.0423054	-0.0033389	-0.00232475		-0.0104496	0.0294791	0.0701296	0.0717361		-0.0336962	0.0242347	0.061733	0.0648623		0.000639386	0.000118985	0.00133983	0.000140223		0.00141493	0.00121109	0.000337828	0.000527232		0.000886775	0.000713719	0.000921681	0.0015608		0	-0.000520401	0.000700449	-0.000499163
0.897687	0.93189	0.893007	0.897967		0.882117	0.917573	0.958441	0.967897		0.87191	0.924581	0.974763	0.966772		0	0.0342027	-0.00468044	0.000279415		-0.0155706	0.0198854	0.0607539	0.0702099		-0.0257768	0.0268933	0.0770753	0.0690847		0.00089661	0.000146499	0.00142134	0.000245136		0.00176059	0.00177639	0.000329534	0.000435504		0.000891561	0.000397751	0.000459947	0.000835064		0	-0.000750111	0.000524731	-0.000651474
0.888635	0.93942	0.892981	0.902043		0.87245	0.933765	0.963836	0.956916		0.867851	0.930754	0.96019	0.976616		0	0.050785	0.00434522	0.0134078		-0.0161851	0.0451293	0.0752008	0.0682809		-0.0207843	0.042119	0.0715548	0.0879803		0.00102067	0.000476818	0.0011839	0.000401372		0.000862163	0.00169156	0.000283207	0.000959003		0.00159027	0.000802014	0.000751062	0.000642907		0	-0.000543851	0.000163227	-0.000619297
0.890389	0.935753	0.893215	0.899027		0.869357	0.918128	0.95283	0.959573		0.859309	0.92654	0.973816	0.960477		0	0.0453637	0.00282527	0.00863734		-0.0210325	0.0277385	0.062441	0.0691839		-0.0310809	0.0361505	0.083427	0.0700872		0.00121824	0.000395553	0.000768402	0.000562009		0.00155407	0.0014114	0.000682487	0.00046929		0.000708058	0.00134891	0.000240847	0.000452074		0	-0.000822683	-0.000449834	-0.000656227
0.901637	0.933058	0.892832	0.901995		0.875106	0.926808	0.968953	0.972042		0.880237	0.915991	0.972327	0.959138		0	0.0314215	-0.00880422	0.000358201		-0.026531	0.0251714	0.0673167	0.0704052		-0.0213994	0.014354	0.0706906	0.0575016		0.00023905	0.000327875	0.000720559	0.000297826		0.000736334	0.00138056	0.000348606	0.000416945		0.00100506	0.000331466	0.000117739	0.000978281		0	8.88249e-05	0.000481509	5.87756e-05
0.905106	0.942488	0.900524	0.910271		0.874087	0.936296	0.966061	0.961024		0.882369	0.935135	0.975127	0.962901		0	0.037382	-0.00458181	0.00516484		-0.0310192	0.0311901	0.0609553	0.0559181		-0.0227367	0.0300294	0.070021	0.0577956		0.000523884	0.00082736	0.000606988	0.000223052		0.0018319	0.00132063	0.000632103	0.00069435		0.000479937	0.000785036	0.000493854	0.00180965		0	0.000303476	8.31039e-05	-0.000300832
0.90604	0.941773	0.902661	0.902771		0.888279	0.940006	0.970472	0.963242		0.867512	0.925841	0.966223	0.963157		0	0.0357335	-0.00337882	-0.0032692		-0.0177605	0.033966	0.0644324	0.0572018		-0.0385273	0.0198016	0.0601831	0.0571175		0.000848124	0.000378838	0.000916367	0.000373485		0.00191738	0.00117218	0.000273498	0.000432854		0.00113395	0.00114353	0.000205813	0.000763943		0	-0.000469286	6.82433e-05	-0.000474639
0.898612	0.942875	0.908983	0.906869		0.881472	0.938652	0.953047	0.970065		0.875596	0.920544	0.969859	0.964119		0	0.0442637	0.0103711	0.00825773		-0.0171394	0.0400399	0.0544349	0.0714531		-0.0230152	0.0219325	0.0712469	0.0655078		0.000284384	0.000401759	0.000642012	0.000134799		0.000390087	0.000605739	0.000493462	0.000527318		0.0021249	0.000285448	0.000278937	0.00089434		0	0.000117375	0.000357628	-0.000149585
0.897543	0.929687	0.905212	0.907163		0.888055	0.930562	0.960476	0.967817		0.862989	0.936952	0.960844	0.97072		0	0.0321443	0.00766872	0.00962015		-0.00948847	0.0330188	0.0629325	0.0702744		-0.0345541	0.0394089	0.0633014	0.0731765		0.000602107	0.000781244	0.00105025	0.000113798		0.000698483	0.00112557	0.000275864	0.000590138		0.00145632	0.000579607	0.000531848	0.000346592		0	0.000179137	0.000448145	-0.00048831
0.905147	0.934088	0.904401	0.908793		0.885616	0.931467	0.964495	0.968263		0.881194	0.931496	0.969728	0.954459		0	0.0289408	-0.000746416	0.00364558		-0.0195314	0.0263193	0.0593477	0.0631154		-0.0239531	0.0263488	0.064581	0.0493121		0.000424352	0.00129157	0.000381388	0.000182411		0.000598583	0.000987107	0.00038596	0.000501308		0.00137499	0.00106807	0.000583122	0.000878571		0	0.000867221	-4.29634e-05	-0.000241941
0.909555	0.933656	0.903819	0.918879		0.883967	0.930514	0.956731	0.967321		0.866459	0.926035	0.957416	0.962123		0	0.0241009	-0.00573592	0.00932372		-0.0255884	0.0209591	0.0471756	0.0577657		-0.0430962	0.0164796	0.0478602	0.0525672		0.000383976	0.000286374	0.000466037	0.000300768		0.000567898	0.000746334	0.000558088	0.000423113		0.00130647	0.000454367	0.000537496	0.000242755		0	-9.7602e-05	8.20613e-05	-8.32078e-05
0.899242	0.939719	0.904362	0.912714		0.88519	0.947438	0.961179	0.967909		0.868289	0.927643	0.968711	0.963391		0	0.0404777	0.00512043	0.0134724		-0.0140518	0.0481963	0.0619373	0.0686669		-0.0309523	0.0284015	0.0694695	0.0641495		0.000684942	0.000228385	0.00100385	0.000229654		0.000764533	0.00119489	0.00035996	0.000484272		0.000860247	0.000438446	0.000306045	0.0012551		0	-0.000456557	0.00031891	-0.000455287
0.900881	0.94342	0.917553	0.917333		0.879381	0.953626	0.966216	0.969955		0.87587	0.921888	0.975478	0.95674		0	0.0425389	0.0166718	0.0164525		-0.0214999	0.052745	0.0653354	0.0690741		-0.0250107	0.0210068	0.074597	0.055859		0.00055359	0.000582666	0.000764298	0.000135648		0.00207642	0.000600965	0.000229393	0.000854938		0.000937988	0.000561336	0.000565193	0.000635796		0	2.90761e-05	0.000210708	-0.000417942
0.89321	0.935623	0.917934	0.917755		0.879364	0.943723	0.96015	0.969941		0.880401	0.945674	0.97275	0.96404		0	0.0424129	0.0247245	0.0245457		-0.0138459	0.0505137	0.0669398	0.076731		-0.0128088	0.0524642	0.0795398	0.0708301		0.000708783	0.000693363	0.000986991	0.000119038		0.00195427	0.000907396	0.000503746	0.000552776		0.00105363	0.000667049	0.000645068	0.000953317		0	-1.54194e-05	0.000278208	-0.000589745
0.907505	0.94208	0.912612	0.919835		0.885218	0.946153	0.969983	0.967727		0.874507	0.932541	0.970803	0.969023		0	0.0345753	0.00510669	0.01233		-0.0222865	0.0386479	0.0624784	0.0602217		-0.0329977	0.0250361	0.0632978	0.0615179		0.000967004	0.000428655	0.000990902	0.000392846		0.000906234	0.00179171	0.00053408	0.00025404		0.000870856	0.000646415	0.000597616	0.000344036		0	-0.000538349	2.38986e-05	-0.000574158
0.915181	0.944521	0.913777	0.923349		0.875673	0.929458	0.961901	0.964522		0.892828	0.930656	0.972077	0.970186		0	0.0293395	-0.00140408	0.00816737		-0.0395082	0.0142767	0.0467196	0.049341		-0.022353	0.0154745	0.0568954	0.0550041		0.000381987	0.000293486	0.00090408	0.000311289		0.000254236	0.000992699	0.000610518	0.000791688		0.0015192	0.000637675	0.000532471	0.000738479		0	-8.85012e-05	0.000522093	-7.06981e-05
0.917645	0.937942	0.917073	0.918121		0.883959	0.94845	0.963761	0.958123		0.883699	0.938379	0.968285	0.964886		0	0.0202967	-0.000571883	0.000476376		-0.0336859	0.0308046	0.0461163	0.0404776		-0.0339457	0.0207343	0.0506401	0.0472405		0.00106944	0.000375453	0.00151561	0.000304661		0.000782748	0.00101743	0.000735036	0.000601966		0.00190987	0.000141346	0.00023704	0.000267222		0	-0.000693988	0.000446166	-0.00076478
0.905518	0.942374	0.915307	0.916813		0.896115	0.943605	0.97324	0.958897		0.877145	0.934404	0.976381	0.971711		0	0.0368556	0.00978929	0.0112945		-0.00940278	0.0380874	0.0677221	0.053379		-0.0283729	0.0288858	0.0708631	0.0661931		0.000313302	0.000499574	0.000999597	0.000270539		0.000672477	0.00226041	0.000319358	0.000692313		0.000544923	0.000269288	0.000489819	0.000162705		0	0.000186272	0.000686296	-4.27633e-05
0.906157	0.953205	0.910217	0.919349		0.885865	0.957815	0.96661	0.968861		0.880746	0.936324	0.967063	0.968994		0	0.0470477	0.00405962	0.0131924		-0.0202922	0.0516581	0.0604529	0.062704		-0.0254106	0.0301672	0.0609058	0.0628369		0.000926465	0.000901586	0.000733469	0.000793942		0.000744671	0.00145859	0.000547613	0.000301744		0.000923762	0.000389044	0.000491997	0.000813057		0	-2.48796e-05	-0.000192996	-0.000132523
0.901484	0.949711	0.910729	0.925064		0.892923	0.958666	0.978249	0.966119		0.870639	0.930774	0.972429	0.972622		0	0.0482266	0.00924514	0.0235797		-0.00856099	0.0571815	0.0767647	0.0646346		-0.0308448	0.0292894	0.0709452	0.0711382		0.000556701	0.000210293	0.000623414	0.000314584		0.000516519	0.000975032	0.00042168	0.000538415		0.0014039	9.21734e-05	0.000440427	0.000354704		0	-0.000346407	6.6713e-05	-0.000242117
0.912947	0.94424	0.920159	0.928593		0.875368	0.933503	0.966624	0.96555		0.883699	0.934698	0.969778	0.958283		0	0.0312931	0.00721165	0.0156464		-0.0375795	0.0205557	0.0536765	0.0526033		-0.0292476	0.0217507	0.0568309	0.0453363		0.00114538	0.000499775	0.000820823	0.000150114		0.00101606	0.000920797	0.000265849	0.000765005		0.000238486	0.000357619	0.000572121	0.000508783		0	-0.000645605	-0.000324557	-0.000995266
0.90839	0.947982	0.909538	0.934662		0.895528	0.947622	0.974731	0.960714		0.889587	0.940743	0.96896	0.96121		0	0.0395917	0.00114779	0.0262716		-0.0128615	0.0392321	0.0663415	0.052324		-0.0188034	0.0323535	0.06057	0.0528199		0.000584409	0.000547905	0.00124581	8.97234e-05		0.00140617	0.000908434	0.000176008	0.000666149		0.000863854	0.000658245	0.00023324	0.000894304		0	-3.65032e-05	0.000661402	-0.000494685
0.908711	0.941329	0.910495	0.932217		0.897125	0.949901	0.968222	0.978079		0.876718	0.933127	0.972037	0.966954		0	0.0326182	0.00178456	0.0235062		-0.0115858	0.04119	0.0595109	0.0693681		-0.0319934	0.0244164	0.0633264	0.0582433		0.000628867	0.000531003	0.000561655	0.000137603		0.000957654	0.000718487	0.000440241	0.000761507		0.00104718	0.000936888	0.000215894	0.000304638		0	-9.78636e-05	-6.72115e-05	-0.000491264
0.897669	0.948849	0.916853	0.924808		0.894351	0.940905	0.971448	0.97148		0.895908	0.931504	0.97088	0.977237		0	0.0511802	0.0191838	0.0271388		-0.00331826	0.0432356	0.0737786	0.0738106		-0.00176165	0.0338351	0.0732104	0.0795675		0.000608955	0.000432391	0.000526646	0.000120701		0.00191419	0.000989399	0.000334792	0.000494949		0.000356042	0.000676517	0.00022567	0.000324225		0	-0.000176563	-8.23085e-05	-0.000488253
0.898387	0.951721	0.91285	0.91939		0.889918	0.943512	0.968466	0.973218		0.88066	0.946135	0.971057	0.971821		0	0.0533345	0.0144632	0.0210029		-0.00846888	0.0451258	0.0700793	0.0748308		-0.0177265	0.047748	0.0726705	0.0734343		0.000399985	0.000475072	0.000638081	0.000191054		0.00179326	0.000564832	0.000283621	0.000907635		0.000719894	0.000909919	0.00032331	0.000346321		0	7.50871e-05	0.000238096	-0.000208931
0.905	0.949686	0.907206	0.923251		0.897114	0.94753	0.963346	0.966788		0.881908	0.940424	0.97498	0.971072		0	0.0446866	0.00220615	0.0182516		-0.00788515	0.0425304	0.0583466	0.0617882		-0.0230912	0.0354248	0.0699808	0.0660721		0.000451865	0.000195928	0.00101958	0.000184195		0.00145245	0.000561256	0.00113046	0.000518873		0.00123409	0.000523	0.000230221	0.000216284		0	-0.000255937	0.000567714	-0.00026767
0.900148	0.945214	0.912351	0.919397		0.89611	0.950387	0.960515	0.975212		0.886975	0.938571	0.970826	0.968376		0	0.0450662	0.0122031	0.0192497		-0.00403758	0.0502393	0.060367	0.0750641		-0.0131732	0.0384234	0.0706781	0.0682278		0.000768085	0.000446226	0.00103484	0.000323649		0.00159827	0.000501561	0.00013142	0.000446566		0.000600051	0.000643368	0.000129724	0.000473957		0	-0.000321859	0.000266759	-0.000444436
0.90068	0.943522	0.908225	0.926816		0.908649	0.940111	0.96238	0.979971		0.887309	0.937044	0.984118	0.969248		0	0.0428418	0.00754461	0.0261355		0.00796906	0.039431	0.0616999	0.079291		-0.0133718	0.0363635	0.083438	0.0685676		0.000643891	0.000485623	0.000718578	0.000176697		0.00171907	0.00104932	0.00098295	0.00055052		0.00096451	0.000280805	0.000106331	0.000470187		0	-0.000158268	7.46872e-05	-0.000467194
0.90385	0.943595	0.907857	0.934109		0.877223	0.95584	0.96074	0.969126		0.87908	0.951305	0.968037	0.963879		0	0.0397451	0.00400712	0.0302584		-0.0266274	0.0519896	0.0568893	0.065276		-0.0247704	0.0474548	0.0641865	0.0600285		0.00127165	0.000356704	0.000965805	0.000382443		0.00106534	0.000696425	0.000919111	0.000785646		0.000701396	0.000503351	0.000201905	0.000556514		0	-0.000914942	-0.00030584	-0.000889203
0.920664	0.951022	0.916005	0.927979		0.889813	0.963811	0.969488	0.959887		0.890267	0.944667	0.960869	0.966968		0	0.0303581	-0.0046582	0.00731515		-0.0308504	0.043147	0.048824	0.0392239		-0.0303963	0.0240037	0.0402053	0.0463049		0.000807114	0.000356399	0.00135064	0.000101017		0.00143539	0.00050319	0.000560257	0.000758384		0.00126296	0.000504653	0.00025571	0.00034921		0	-0.000450715	0.00054353	-0.000706097
0.905874	0.95352	0.913104	0.934844		0.89122	0.943245	0.965216	0.964237		0.888297	0.951025	0.966695	0.963534		0	0.0476463	0.00723014	0.0289705		-0.0146538	0.0373711	0.0593419	0.0583637		-0.0175766	0.045151	0.0608211	0.0576602		0.000455023	0.000563992	0.00160646	0.000568304		0.00252209	0.00128231	0.000483421	0.000684707		0.00030772	0.000233792	0.000266643	0.000478422		0	0.000108969	0.00115143	0.000113281
0.916594	0.950301	0.913145	0.922786		0.885157	0.947396	0.968848	0.968981		0.893064	0.955499	0.965827	0.968645		0	0.0337066	-0.00344924	0.00619183		-0.0314372	0.0308013	0.0522539	0.0523861		-0.0235303	0.0389048	0.0492325	0.0520509		0.000595898	0.00075309	0.000622077	0.000300602		0.000485904	0.00132503	0.000415038	0.000412263		0.000598999	0.00101186	0.000328571	0.000430077		0	0.000157192	2.61794e-05	-0.000295296
0.921076	0.941417	0.913733	0.944494		0.890596	0.93563	0.96769	0.969661		0.897408	0.952043	0.977013	0.974814		0	0.0203407	-0.00734296	0.0234176		-0.0304801	0.0145537	0.0466133	0.0485852		-0.0236687	0.0309669	0.0559364	0.0537373		0.000552021	0.000464867	0.00063191	0.000341951		0.000757641	0.000693207	0.0006094	0.000291738		0.00121873	0.000382294	0.000767246	0.000647082		0	-8.71544e-05	7.98889e-05	-0.00021007
0.903155	0.945815	0.920858	0.920484		0.88953	0.945992	0.964981	0.959819		0.894077	0.949623	0.979899	0.982263		0	0.0426598	0.0177035	0.0173289		-0.0136245	0.0428374	0.0618258	0.0566643		-0.00907757	0.0464685	0.0767436	0.0791084		0.000878451	0.000448106	0.000829245	0.000365813		0.00116235	0.00168681	0.000275328	0.000615672		0.00106273	0.000217167	0.000118619	0.000429486		0	-0.000430345	-4.92068e-05	-0.000512639
0.912497	0.95007	0.921208	0.928499		0.898362	0.929548	0.969083	0.977874		0.882465	0.956784	0.974094	0.968811		0	0.0375725	0.008711	0.0160023		-0.0141357	0.0170506	0.0565856	0.0653764		-0.0300318	0.0442873	0.061597	0.0563138		0.00108221	0.000386664	0.00112065	0.000256197		0.000254066	0.000304058	0.000371519	0.000712668		0.00122645	0.0003475	0.000518528	0.000633381		0	-0.000695544	3.84409e-05	-0.00082601
0.912695	0.946643	0.919506	0.931412		0.904307	0.959266	0.970194	0.966799		0.894261	0.959557	0.972525	0.973717		0	0.0339485	0.00681132	0.0187172		-0.00838745	0.0465712	0.0574995	0.0541045		-0.0184334	0.0468619	0.0598302	0.0610223		0.000854225	0.000873096	0.000736732	0.000155914		0.000944202	0.00192159	0.000152675	0.000580783		0.000806011	0.000516287	0.000320077	0.00040874		0	1.88706e-05	-0.000117493	-0.000698312
0.918593	0.953206	0.923505	0.926358		0.89515	0.960567	0.967445	0.97282		0.888633	0.954752	0.97551	0.966671		0	0.0346135	0.00491256	0.007765		-0.0234425	0.0419743	0.0488525	0.054227		-0.0299591	0.0361597	0.0569171	0.0480781		0.000395411	0.000513767	0.00126694	0.000482857		0.00146799	0.00131769	0.000529641	0.000890156		0.00155631	0.000551262	0.000767646	0.000492528		0	0.000118356	0.000871527	8.74455e-05
0.913916	0.942008	0.920096	0.924252		0.888737	0.959877	0.964311	0.965204		0.880704	0.950386	0.979745	0.963502		0	0.0280921	0.0061801	0.0103367		-0.0251787	0.0459616	0.050395	0.0512882		-0.0332118	0.0364699	0.0658289	0.0495858		0.000808326	0.000351263	0.000624244	0.000367426		0.00138529	0.000920087	0.00022436	0.000793938		0.000898359	0.000287176	0.000538158	0.000703684		0	-0.000457064	-0.000184082	-0.0004409
0.913611	0.946909	0.930519	0.928987		0.887321	0.961215	0.963899	0.96819		0.882092	0.954679	0.978631	0.967893		0	0.0332987	0.0169082	0.0153767		-0.0262895	0.0476048	0.0502884	0.0545798		-0.0315182	0.0410687	0.0650207	0.0542828		0.000585483	0.000371544	0.00106827	0.000184365		0.000900028	0.000954962	0.000764991	0.000460514		0.000602264	0.000246897	0.000377612	0.000275264		0	-0.00021394	0.000482785	-0.000401119
0.916638	0.952845	0.924042	0.926264		0.902042	0.941731	0.970513	0.964312		0.89473	0.957182	0.969352	0.962613		0	0.0362071	0.00740356	0.0096262		-0.0145964	0.0250932	0.0538746	0.0476734		-0.021908	0.0405435	0.0527137	0.0459752		0.000505578	0.00041424	0.000888452	0.000156259		0.00112065	0.000559183	0.000469365	0.00055374		0.00105287	0.000261537	0.000193323	0.000718339		0	-9.13371e-05	0.000382874	-0.000349319
0.917903	0.950935	0.917679	0.931598		0.894005	0.974354	0.966453	0.966204		0.884847	0.954096	0.985808	0.970983		0	0.0330321	-0.000223974	0.0136953		-0.0238979	0.0564512	0.0485501	0.0483008		-0.033056	0.0361927	0.0679045	0.0530804		0.000346068	5.97775e-05	0.000946929	0.000176175		0.00102607	0.000728168	0.000253979	0.000329738		0.000950149	0.000490547	0.000113448	0.000916641		0	-0.000286291	0.00060086	-0.000169893
0.916488	0.947921	0.930198	0.921232		0.901915	0.957526	0.964046	0.965637		0.881029	0.94293	0.97528	0.964141		0	0.0314326	0.0137104	0.0047435		-0.0145733	0.0410377	0.0475581	0.0491491		-0.0354591	0.0264421	0.0587918	0.0476533		0.000765274	0.000244012	0.000873531	0.000475592		0.000429028	0.000569112	0.0008408	0.00131338		0.00125933	0.000368161	0.00115311	0.000278482		0	-0.000521263	0.000108257	-0.000289682
0.922427	0.958054	0.920055	0.928246		0.890765	0.95849	0.965153	0.971095		0.890047	0.936097	0.977214	0.975719		0	0.0356266	-0.00237228	0.00581831		-0.0316619	0.0360624	0.0427254	0.0486679		-0.0323798	0.0136698	0.0547868	0.0532917		0.00105374	0.000334012	0.000684959	0.000583697		0.00179068	0.00147311	0.000684718	0.000628051		0.00109834	0.000504038	0.000428633	0.000591403		0	-0.000719731	-0.000368783	-0.000470045
0.9151	0.94194	0.920572	0.932474		0.891799	0.964152	0.965403	0.967001		0.889925	0.952158	0.977371	0.983467		0	0.0268403	0.00547217	0.0173736		-0.0233006	0.0490519	0.0503029	0.0519015		-0.0251745	0.0370585	0.0622706	0.068367		0.000668773	0.000736106	0.000796729	0.000337517		0.0010038	0.00140085	0.000625011	0.000459164		0.000693236	0.0010426	0.000447953	0.000296839		0	6.7333e-05	0.000127956	-0.000331256
0.914608	0.951286	0.921863	0.932945		0.905616	0.961686	0.967975	0.9763		0.88715	0.948563	0.983063	0.974694		0	0.0366782	0.00725453	0.0183368		-0.0089923	0.047078	0.0533666	0.0616918		-0.0274579	0.0339549	0.0684547	0.0600855		0.000828617	0.000721423	0.000971109	0.000398208		0.000441734	0.00145329	0.000428713	0.000853194		0.00163472	0.00033188	0.00038359	0.000819426		0	-0.000107195	0.000142492	-0.00043041
0.908632	0.945809	0.915936	0.932912		0.899399	0.953074	0.978177	0.97116		0.894387	0.941992	0.986979	0.960395		0	0.0371774	0.00730447	0.0242802		-0.00923266	0.0444424	0.0695451	0.0625287		-0.0142447	0.03336	0.0783472	0.0517637		0.000946986	0.000311682	0.00124111	0.000320051		0.0010415	0.000870407	0.000619603	0.000298462		0.0020657	0.000614034	0.000155714	0.000477478		0	-0.000635304	0.000294125	-0.000626935
0.913718	0.959746	0.929581	0.933187		0.895013	0.950417	0.974839	0.970519		0.893688	0.94729	0.971421	0.958349		0	0.046028	0.015863	0.019469		-0.0187048	0.0366993	0.0611205	0.0568013		-0.0200305	0.0335716	0.0577032	0.0446309		0.000458407	0.000187062	0.00123792	0.000231388		0.00116812	0.000954686	0.000602865	0.00068167		0.00191247	0.000292394	0.000336822	0.000874564		0	-0.000271345	0.000779513	-0.00022702
0.913558	0.959034	0.917567	0.932756		0.893147	0.950209	0.961994	0.974982		0.888407	0.948623	0.981771	0.974721		0	0.045476	0.004009	0.0191977		-0.0204111	0.0366508	0.0484358	0.0614244		-0.0251511	0.035065	0.0682132	0.0611631		0.00118291	0.000533545	0.00103712	0.00011831		0.00110635	0.00105838	0.000287386	0.000485783		0.00074078	0.000627304	0.000253806	0.000492722		0	-0.000649365	-0.000145788	-0.0010646
0.922898	0.951586	0.935647	0.931705		0.886409	0.964625	0.971105	0.976941		0.898853	0.948406	0.973543	0.973524		0	0.0286879	0.0127483	0.00880653		-0.0364898	0.041727	0.0482062	0.0540428		-0.0240458	0.0255076	0.0506451	0.0506258		0.000610509	0.000405637	0.00112498	0.000129529		0.00177146	0.00112434	0.000493955	0.000630003		0.000837444	0.00079695	0.000341108	0.000765627		0	-0.000204872	0.000514466	-0.00048098
0.919826	0.954836	0.926027	0.933976		0.904063	0.951722	0.973035	0.968923		0.88901	0.952804	0.972542	0.977189		0	0.03501	0.00620106	0.0141499		-0.0157625	0.0318965	0.0532091	0.0490972		-0.0308157	0.0329787	0.0527164	0.0573634		0.000849268	0.00071056	0.000793393	0.000161528		0.00132892	0.0014095	0.000248157	0.000711893		0.00119196	0.000576207	0.000445592	0.000366028		0	-0.000138708	-5.58751e-05	-0.000687739
0.919721	0.96199	0.927005	0.936397		0.89833	0.958597	0.975182	0.967152		0.892845	0.945504	0.978997	0.974603		0	0.042269	0.00728436	0.0166758		-0.0213909	0.0388764	0.0554613	0.0474314		-0.0268758	0.0257834	0.0592765	0.0548818		0.00138436	0.000407846	0.00068279	0.000125381		0.000791906	0.000775782	0.000311295	0.000682712		0.0012551	0.000421372	0.000250308	0.00145252		0	-0.000976511	-0.000701567	-0.00125898
0.92505	0.959914	0.920697	0.930204		0.888691	0.955341	0.979229	0.975858		0.900995	0.946895	0.981711	0.972301		0	0.0348648	-0.00435225	0.00515492		-0.0363587	0.0302913	0.0541795	0.0508085		-0.0240547	0.0218459	0.0566618	0.047251		0.000326994	0.000577376	0.00117509	0.00107028		0.000712848	0.00126975	0.000252166	0.000656641		0.00106327	0.000512844	0.000435297	0.000680931		0	0.000250382	0.000848099	0.000743283
0.927542	0.948377	0.908512	0.93192		0.895273	0.945133	0.972848	0.976753		0.896429	0.952	0.968281	0.975101		0	0.0208344	-0.0190303	0.00437801		-0.0322697	0.017591	0.0453058	0.0492102		-0.0311138	0.0244574	0.0407385	0.0475582		0.00104607	0.000253516	0.000560488	0.000297774		0.000517012	0.000884687	0.000781492	0.000420106		0.000559326	0.000413756	0.000322746	0.000665575		0	-0.000792549	-0.000485578	-0.000748291
0.921225	0.946521	0.936547	0.921844		0.890457	0.953506	0.974251	0.969829		0.891399	0.953721	0.971919	0.974356		0	0.0252963	0.0153219	0.000619218		-0.0307682	0.0322815	0.0530267	0.0486041		-0.0298259	0.0324964	0.050694	0.0531311		0.000511009	0.000110935	0.000796373	0.000797437		0.000803237	0.00102098	0.000456666	0.000746828		0.00114192	0.000373084	0.000257638	0.000700448		0	-0.000400074	0.000285364	0.000286428
0.933225	0.942272	0.923868	0.934395		0.903468	0.950493	0.969544	0.97544		0.907354	0.96514	0.97699	0.97263		0	0.00904721	-0.00935711	0.0011698		-0.0297565	0.0172684	0.0363197	0.0422154		-0.0258707	0.0319154	0.0437654	0.0394051		0.000724888	0.000470536	0.00115754	0.000673952		0.00175189	0.00154474	0.0003623	0.000505792		0.000273808	0.00015289	0.0001215	0.000770172		0	-0.000254352	0.000432648	-5.09358e-05
0.920917	0.954122	0.927013	0.925514		0.898441	0.949306	0.973966	0.962822		0.90457	0.961005	0.971086	0.970414		0	0.0332054	0.00609625	0.00459741		-0.0224753	0.0283899	0.0530499	0.041905		-0.0163462	0.0400883	0.0501696	0.0494975		0.00125326	0.000872924	0.000793253	0.00030537		0.00247025	0.000824391	0.000328048	0.00047747		0.000617853	0.000370832	0.000462965	0.000763802		0	-0.000380337	-0.000460009	-0.000947892
0.912701	0.951921	0.927816	0.938558		0.894128	0.964299	0.979598	0.975245		0.907241	0.964382	0.969187	0.9755		0	0.0392203	0.0151148	0.0258564		-0.018573	0.0515981	0.0668965	0.062544		-0.00546025	0.0516812	0.0564855	0.062799		0.000748913	0.000508333	0.000800811	0.000216981		0.00151594	0.000908735	0.00101384	0.00143194		0.00111313	0.000192862	0.000285392	0.000810337		0	-0.00024058	5.1898e-05	-0.000531932
0.917575	0.956779	0.929271	0.934665		0.907255	0.942371	0.973349	0.972642		0.910102	0.956149	0.975551	0.97417		0	0.0392039	0.0116952	0.0170901		-0.0103201	0.0247957	0.0557738	0.0550666		-0.00747289	0.0385736	0.0579757	0.0565947		0.000636573	0.000370578	0.000655756	0.000369361		0.00199534	0.000529824	0.000541158	0.000826907		0.000392798	0.000681114	0.000332973	0.000591148		0	-0.000265995	1.9183e-05	-0.000267213
0.917023	0.958203	0.925985	0.935338		0.897806	0.956373	0.979612	0.966904		0.901757	0.947367	0.975634	0.970597		0	0.0411794	0.00896209	0.018315		-0.0192174	0.03935	0.0625883	0.0498804		-0.0152667	0.0303442	0.058611	0.0535732		0.00033796	8.96219e-05	0.000711671	0.00016524		0.00134341	0.000849987	0.000773435	0.000612105		0.000556925	0.000229553	0.000366511	0.000490297		0	-0.000248338	0.000373711	-0.00017272
0.926174	0.955154	0.92439	0.939203		0.90027	0.960659	0.982899	0.963823		0.888656	0.93805	0.984997	0.967087		0	0.02898	-0.0017838	0.0130286		-0.025904	0.0344844	0.0567252	0.0376492		-0.037518	0.011876	0.0588227	0.040913		0.00056471	0.000420531	0.00106351	0.000412316		0.00144307	0.000646519	0.00146068	0.000675666		0.000825297	0.000346591	0.000946631	0.000463684		0	-0.000144179	0.000498799	-0.000152394
0.919858	0.943305	0.928122	0.932354		0.905389	0.950488	0.968556	0.972039		0.885327	0.948603	0.977203	0.96951		0	0.0234468	0.00826395	0.0124956		-0.0144695	0.0306297	0.0486975	0.0521807		-0.0345313	0.0287444	0.0573448	0.0496518		0.000485624	0.000463628	0.000447242	0.000325936		0.00121522	0.000670821	0.000940165	0.000529832		0.00111604	0.000276952	0.000400313	0.000444257		0	-2.19952e-05	-3.83816e-05	-0.000159687
0.919095	0.94559	0.916737	0.933475		0.896931	0.950305	0.976328	0.972852		0.912134	0.943909	0.982096	0.963888		0	0.0264949	-0.00235775	0.0143804		-0.0221639	0.0312097	0.0572332	0.0537574		-0.00696045	0.0248137	0.063001	0.0447928		0.000891231	0.000217399	0.000568895	9.94075e-05		0.000935035	0.000943075	0.000604294	0.00109975		0.000975168	0.000481685	0.000662658	0.00122965		0	-0.000673832	-0.000322336	-0.000791824
0.928093	0.955675	0.919274	0.927638		0.910865	0.957288	0.97475	0.972114		0.895619	0.945098	0.976849	0.971903		0	0.0275816	-0.00881938	-0.000455702		-0.0172286	0.0291947	0.0466567	0.0440203		-0.0324743	0.0170047	0.0487555	0.0438091		0.00130091	0.000460926	0.000869617	0.000756076		0.00046413	0.00125387	0.000509921	0.000755912		0.000493579	0.000763998	0.000217883	0.00029989		0	-0.000839987	-0.000431297	-0.000544838
0.932029	0.952362	0.929494	0.931695		0.880326	0.946188	0.975832	0.973548		0.897585	0.944839	0.977754	0.973361		0	0.020333	-0.00253524	-0.000334188		-0.0517025	0.0141588	0.0438031	0.0415192		-0.0344441	0.0128104	0.0457256	0.0413321		0.00102283	0.000314278	0.000885704	0.000185141		0.00101865	0.000764756	0.000808246	0.000690994		0.000759457	0.000377082	0.000388293	0.000340882		0	-0.000708556	-0.00013713	-0.000837693
0.923127	0.956111	0.9279	0.936428		0.891333	0.966372	0.962389	0.966841		0.897749	0.943326	0.965815	0.96118		0	0.0329843	0.00477253	0.0133011		-0.0317937	0.0432447	0.0392621	0.0437134		-0.0253784	0.0201992	0.0426874	0.0380526		0.000643588	0.000359856	0.00076077	0.000581356		0.00166832	0.000735283	0.000395965	0.000545003		0.00131256	0.000560837	0.000249353	0.000501769		0	-0.000283731	0.000117182	-6.2232e-05
0.917363	0.956896	0.917953	0.938084		0.885108	0.963638	0.971581	0.967221		0.899274	0.941953	0.97147	0.965384		0	0.0395337	0.000590155	0.0207213		-0.0322549	0.046275	0.0542185	0.0498587		-0.0180892	0.0245903	0.0541076	0.0480217		0.000204058	0.000651134	0.000681952	0.000561716		0.00147657	0.00116445	0.000448506	0.000747885		0.000768506	0.000559365	0.000205493	0.000751018		0	0.000447076	0.000477894	0.000357658
0.922378	0.954779	0.92666	0.939525		0.898592	0.958159	0.977776	0.969939		0.901373	0.958628	0.982678	0.961766		0	0.0324006	0.00428215	0.0171474		-0.0237863	0.0357814	0.0553977	0.0475613		-0.0210052	0.0362496	0.0602997	0.0393882		0.000644476	0.000301385	0.000543973	0.000427553		0.00104237	0.00114428	0.000946293	0.000950008		0.00176754	0.000468128	0.000483	0.00072477		0	-0.000343091	-0.000100504	-0.000216924
0.922944	0.94839	0.921051	0.93332		0.89977	0.96097	0.963504	0.963636		0.902159	0.951068	0.978705	0.977975		0	0.0254466	-0.00189296	0.0103765		-0.0231737	0.0380259	0.0405599	0.0406922		-0.0207847	0.0281239	0.055761	0.0550308		0.000189561	0.000495433	0.000885645	0.000306445		0.0014612	0.00102176	0.000554981	0.00061871		0.000816025	0.000933392	0.000675652	0.000495925		0	0.000305871	0.000696084	0.000116883
0.92311	0.952615	0.916613	0.933631		0.898979	0.95383	0.973313	0.968234		0.902944	0.956984	0.97714	0.96699		0	0.029505	-0.00649722	0.0105209		-0.0241313	0.03072	0.0502034	0.0451237		-0.0201663	0.0338741	0.0540299	0.0438799		0.000914934	0.000187904	0.000937104	0.0002923		0.00104857	0.000702383	0.000742908	0.000727174		0.000358529	0.000207663	0.0002899	0.000698831		0	-0.00072703	2.21708e-05	-0.000622634
0.926562	0.954623	0.923848	0.94036		0.892951	0.958507	0.975105	0.98292		0.909227	0.948586	0.980477	0.974317		0	0.0280607	-0.00271424	0.013798		-0.0336108	0.0319448	0.0485432	0.0563582		-0.0173351	0.0220243	0.0539154	0.0477552		0.000648179	0.000538231	0.00075315	0.000209643		0.000525117	0.00155392	0.000806845	0.00111802		0.00227754	0.000526541	0.000618645	0.00122248		0	-0.000109949	0.000104971	-0.000438536
0.920659	0.954472	0.923521	0.935279		0.895364	0.961592	0.970664	0.978166		0.903247	0.946376	0.978616	0.971418		0	0.033813	0.00286124	0.0146199		-0.0252951	0.0409328	0.0500041	0.057507		-0.0174121	0.0257168	0.0579562	0.0507591		0.00154861	0.000761476	0.0011231	0.000501848		0.00121779	0.00119023	0.000996886	0.00168516		0.000858864	0.00126798	0.000365946	0.000461635		0	-0.000787135	-0.000425514	-0.00104676
0.922871	0.954676	0.917445	0.931677		0.896529	0.94892	0.963405	0.976506		0.906627	0.954942	0.978174	0.957925		0	0.0318052	-0.00542604	0.00880675		-0.0263412	0.026049	0.0405341	0.0536358		-0.0162434	0.032071	0.0553034	0.0350545		0.00093707	0.000381807	0.000632692	0.000333477		0.000930014	0.000621231	0.000988131	0.00040059		0.00132512	0.000318659	0.000313399	0.00104053		0	-0.000555262	-0.000304378	-0.000603593
0.926799	0.95681	0.917513	0.938481		0.888238	0.955976	0.968161	0.969026		0.905172	0.95446	0.979411	0.974935		0	0.0300116	-0.00928543	0.011682		-0.0385612	0.0291768	0.0413619	0.0422274		-0.0216263	0.0276615	0.052612	0.0481364		0.000796636	0.000296338	0.00134888	0.000514023		0.00145437	0.00135967	0.000662137	0.000415179		0.000634503	0.000804191	0.000394776	0.000520687		0	-0.000500298	0.00055224	-0.000282613
0.932734	0.956097	0.92508	0.93553		0.895422	0.951801	0.967538	0.966961		0.900012	0.953795	0.978283	0.963198		0	0.0233635	-0.00765368	0.00279642		-0.0373118	0.0190675	0.0348045	0.034227		-0.0327218	0.0210612	0.0455495	0.030464		0.000403935	0.000376181	0.00105079	0.00035377		0.00077703	0.000953243	0.000416814	0.000754482		0.00129676	0.00036882	0.000419657	0.000760519		0	-2.77535e-05	0.000646858	-5.01648e-05
0.922357	0.93766	0.92429	0.933911		0.895309	0.956681	0.964059	0.974638		0.902966	0.967352	0.966681	0.976368		0	0.015303	0.00193274	0.011554		-0.0270484	0.0343236	0.0417019	0.0522813		-0.0193915	0.0449949	0.0443236	0.0540108		0.00098259	0.00029608	0.000928866	0.000833622		0.000976124	0.00155043	0.000282716	0.000971496		0.000841197	0.000774325	0.000387105	0.000731478		0	-0.00068651	-5.37237e-05	-0.000148968
0.919091	0.936556	0.92288	0.934161		0.896465	0.94337	0.979013	0.969242		0.895883	0.957293	0.967173	0.974442		0	0.0174651	0.0037888	0.0150693		-0.0226258	0.0242792	0.0599214	0.0501506		-0.0232079	0.0382018	0.0480815	0.0553508		0.000433442	0.0011121	0.000616355	0.000394297		0.00089733	0.000483744	0.000460265	0.000638278		0.000933824	0.00080725	0.000249176	0.000505338		0	0.000678654	0.000182913	-3.91442e-05
0.930864	0.952048	0.920285	0.924032		0.901731	0.952307	0.966395	0.974672		0.890308	0.951011	0.97861	0.956954		0	0.021184	-0.0105796	-0.00683266		-0.029133	0.0214424	0.0355301	0.0438081		-0.0405565	0.0201465	0.0477456	0.0260893		0.000344826	0.000236895	0.000727198	0.000329121		0.000853803	0.000892701	0.000711633	0.000634151		0.0010933	0.000684914	0.000139689	0.000858457		0	-0.000107931	0.000382372	-1.57049e-05
0.928314	0.940749	0.929908	0.92191		0.899194	0.968986	0.963542	0.965154		0.893433	0.959355	0.979566	0.966927		0	0.0124352	0.00159397	-0.00640441		-0.0291198	0.0406719	0.0352277	0.0368397		-0.0348808	0.0310404	0.0512518	0.0386125		0.000413627	0.000498174	0.00163042	0.00037154		0.000782108	0.000734071	0.000494313	0.000562247		0.00086685	0.00044486	0.000533973	0.000663976		0	8.45475e-05	0.00121679	-4.20863e-05
0.922155	0.945391	0.928121	0.929442		0.88083	0.959521	0.95314	0.965518		0.893191	0.955883	0.978322	0.968575		0	0.023236	0.00596633	0.00728742		-0.0413248	0.037367	0.0309852	0.043363		-0.0289637	0.033728	0.0561675	0.0464208		0.000966394	0.000177393	0.00093701	0.000208884		0.000870653	0.000806686	0.000295236	0.000672724		0.000449021	0.000310812	0.000165155	0.000471699		0	-0.000789001	-2.9384e-05	-0.00075751
0.920367	0.950942	0.926724	0.931005		0.912442	0.960966	0.972059	0.975895		0.898156	0.947407	0.980024	0.964405		0	0.0305744	0.00635681	0.0106377		-0.00792567	0.0405981	0.051692	0.0555275		-0.0222112	0.0270394	0.0596564	0.0440371		0.000796317	0.000322382	0.0006235	0.000471834		0.000931495	0.000618474	0.000947833	0.000607668		0.000848007	0.000880544	0.000609213	0.000510338		0	-0.000473935	-0.000172816	-0.000324483
0.918497	0.946486	0.932479	0.924674		0.900182	0.944167	0.966512	0.970978		0.897437	0.953439	0.975431	0.977959		0	0.0279881	0.0139814	0.00617643		-0.0183152	0.0256698	0.0480143	0.0524809		-0.0210602	0.0349413	0.0569331	0.0594618		0.000682494	0.000287393	0.000639327	0.000479294		0.00108269	0.00026465	0.000327438	0.000656558		0.00171977	0.000421078	0.000447689	0.000558146		0	-0.000395101	-4.31678e-05	-0.000203201
0.922812	0.951822	0.922942	0.921772		0.89017	0.958134	0.964551	0.975227		0.897974	0.957098	0.980361	0.968059		0	0.0290098	0.00012991	-0.0010405		-0.0326425	0.0353214	0.0417388	0.0524144		-0.0248383	0.0342853	0.0575486	0.0452471		0.00078184	0.000689788	0.00071782	0.000395431		0.00117542	0.00172592	0.00051028	0.000726354		0.00107999	0.000558411	0.000269227	0.00113626		0	-9.20521e-05	-6.40203e-05	-0.000386409
0.930491	0.951866	0.931225	0.927022		0.902285	0.953189	0.963341	0.970675		0.912781	0.932803	0.983638	0.973229		0	0.0213746	0.000734223	-0.0034686		-0.0282064	0.0226984	0.0328497	0.0401841		-0.01771	0.00231213	0.0531467	0.0427376		0.000472123	0.000301877	0.00131	0.000358495		0.000960757	0.000795467	0.000479307	0.000676872		0.000554691	0.000624767	0.000134053	0.0005706		0	-0.000170246	0.00083788	-0.000113628
0.927109	0.95505	0.922628	0.924537		0.898412	0.959111	0.970095	0.965572		0.903413	0.960449	0.989647	0.969481		0	0.0279411	-0.00448085	-0.00257174		-0.028697	0.0320015	0.0429856	0.0384626		-0.0236956	0.0333403	0.0625375	0.0423724		0.000652906	0.000469147	0.000681539	0.000289572		0.00105472	0.00137719	0.000327361	0.000825505		0.000672224	8.00961e-05	0.000283733	0.00145297		0	-0.000183759	2.86338e-05	-0.000363333
0.931472	0.959122	0.924505	0.929103		0.891838	0.958182	0.966897	0.975602		0.911185	0.951252	0.976083	0.967118		0	0.0276497	-0.00696675	-0.00236903		-0.0396342	0.0267104	0.0354254	0.0441304		-0.0202868	0.0197798	0.044611	0.0356458		0.000909418	0.000555401	0.000826138	0.000230645		0.00103533	0.00133202	0.000214155	0.000795456		0.000479373	0.00126846	0.000388563	0.000828815		0	-0.000354017	-8.32798e-05	-0.000678773
0.931731	0.959141	0.931979	0.924648		0.891494	0.968276	0.970399	0.966506		0.899026	0.963211	0.977861	0.96686		0	0.0274097	0.000247292	-0.00708345		-0.0402375	0.0365449	0.0386679	0.0347744		-0.0327057	0.0314793	0.0461297	0.035129		0.000310915	0.000667851	0.00168089	0.000187842		0.000979094	0.0016849	0.000399643	0.000681006		0.00141241	0.000745087	0.000836199	0.000291925		0	0.000356936	0.00136997	-0.000123072
0.923987	0.951299	0.935186	0.927049		0.894884	0.956049	0.969611	0.968565		0.910169	0.940142	0.975461	0.961516		0	0.0273115	0.0111989	0.00306169		-0.0291028	0.0320621	0.045624	0.0445778		-0.013818	0.0161551	0.0514742	0.0375286		0.00033458	0.0002212	0.00139161	0.000513344		0.000932253	0.000705753	0.000628296	0.000599041		0.000735044	0.000866018	0.000281512	0.00085322		0	-0.00011338	0.00105703	0.000178764
0.922585	0.949276	0.920665	0.922693		0.898784	0.954503	0.969402	0.97015		0.901634	0.959198	0.971832	0.968551		0	0.0266911	-0.00192075	0.000107279		-0.0238011	0.0319174	0.0468163	0.047565		-0.0209512	0.0366123	0.0492465	0.0459655		0.000477767	0.000284366	0.00179904	0.000230199		0.000650588	0.00140262	0.000442	0.000452822		0.000996105	0.000502661	0.000650497	0.000598468		0	-0.000193401	0.00132127	-0.000247569
0.927382	0.955869	0.927453	0.93018		0.898585	0.949866	0.978974	0.968345		0.891235	0.96207	0.980603	0.966737		0	0.028487	7.10599e-05	0.00279754		-0.0287973	0.0224837	0.0515912	0.0409627		-0.0361468	0.0346873	0.0532209	0.0393549		0.000711557	0.000560119	0.00163201	0.000655799		0.000632443	0.00119261	0.000360383	0.000783695		0.000380032	0.000674147	0.000641084	0.00146281		0	-0.000151438	0.000920453	-5.57576e-05
0.923654	0.963297	0.930497	0.927962		0.893678	0.949521	0.9668	0.974128		0.903599	0.953781	0.972026	0.970287		0	0.0396431	0.00684268	0.0043084		-0.029976	0.0258674	0.0431459	0.0504737		-0.020055	0.0301269	0.0483717	0.046633		0.000974094	0.000281611	0.00134367	0.000396027		0.000815538	0.000836579	0.00054649	0.000629695		0.000942916	0.00127709	0.000389935	0.000580217		0	-0.000692483	0.00036958	-0.000578068
0.926562	0.949249	0.925899	0.92341		0.905453	0.952877	0.966275	0.956688		0.903385	0.961259	0.988324	0.958772		0	0.0226875	-0.000662357	-0.00315177		-0.0211085	0.0263152	0.0397136	0.0301265		-0.0231764	0.034697	0.0617626	0.0322104		0.000772636	0.000315285	0.000682184	0.000312737		0.00183351	0.00044677	0.000218809	0.000436385		0.00126959	0.00063453	0.000370235	0.000681885		0	-0.000457351	-9.04514e-05	-0.000459899
0.926921	0.964589	0.926352	0.928617		0.885315	0.957774	0.97056	0.977445		0.892353	0.957619	0.97167	0.98051		0	0.0376676	-0.000568959	0.0016956		-0.0416059	0.0308524	0.0436394	0.0505235		-0.0345678	0.0306984	0.0447486	0.0535894		0.000510909	0.000823321	0.000785484	0.000834147		0.00134159	0.000741553	0.000785571	0.000829008		0.000369817	0.000665963	0.000117655	0.000481992		0	0.000312412	0.000274575	0.000323238
0.93607	0.947891	0.921024	0.929859		0.886177	0.952308	0.957679	0.977766		0.886949	0.961591	0.978328	0.959065		0	0.011821	-0.0150458	-0.00621159		-0.0498932	0.0162379	0.0216086	0.0416956		-0.0491213	0.0255204	0.0422573	0.0229947		0.00122079	0.000326447	0.00112416	0.000205518		0.00120623	0.00105291	0.000800015	0.000940092		0.000422271	0.000415418	0.000470715	0.00100301		0	-0.000894341	-9.66298e-05	-0.00101527
0.928852	0.949485	0.921421	0.938295		0.911587	0.947817	0.971183	0.982086		0.87338	0.940971	0.980678	0.972142		0	0.0206332	-0.00743065	0.00944299		-0.0172651	0.0189648	0.0423309	0.0532337		-0.055472	0.0121194	0.0518264	0.0432896		0.00122476	0.00033446	0.000633138	0.00102483		0.00131231	0.000407062	0.000241569	0.000970296		0.0014043	0.000664095	0.000346626	0.000376093		0	-0.000890296	-0.000591617	-0.000199925
0.917863	0.95291	0.922805	0.927982		0.889448	0.954104	0.974437	0.969555		0.899901	0.95941	0.968627	0.964584		0	0.0350467	0.00494112	0.0101189		-0.0284152	0.0362404	0.0565733	0.051692		-0.0179626	0.0415463	0.0507631	0.0467206		0.000954036	0.00038185	0.00112045	0.000923135		0.000698695	0.000664809	0.000292871	0.000713975		0.0013546	0.000925673	0.000681135	0.000643409		0	-0.000572187	0.000166418	-3.09008e-05
0.921356	0.953637	0.930443	0.935298		0.903871	0.95756	0.968	0.974759		0.875829	0.966265	0.969643	0.957432		0	0.0322806	0.00908694	0.0139418		-0.0174849	0.0362037	0.0466439	0.0534026		-0.0455266	0.0449091	0.0482868	0.0360756		0.000882431	0.000510641	0.000697333	0.00115243		0.000611964	0.00118532	0.000428105	0.000398221		0.000668296	0.000288372	0.00059734	0.000698264		0	-0.00037179	-0.000185098	0.000270001
0.935506	0.963093	0.934656	0.939179		0.891492	0.968457	0.961261	0.968401		0.901591	0.95936	0.979301	0.971054		0	0.0275869	-0.000850024	0.00367319		-0.0440141	0.0329512	0.0257549	0.0328947		-0.0339152	0.0238541	0.0437951	0.035548		0.000600764	0.000291186	0.000951128	0.000884692		0.000889511	0.00145516	0.000726329	0.000911566		0.000626898	0.000568098	0.000265186	0.000476177		0	-0.000309578	0.000350364	0.000283928
0.922454	0.9465	0.924428	0.924993		0.88982	0.962676	0.967988	0.966399		0.900489	0.956126	0.982486	0.966244		0	0.0240462	0.00197397	0.00253906		-0.032634	0.0402217	0.0455341	0.0439447		-0.0219644	0.0336725	0.0600326	0.0437899		0.000919512	0.000427907	0.000999103	0.000725849		0.00100034	0.000817292	0.00063762	0.000641043		0.000614675	0.000677775	0.000408815	0.00129013		0	-0.000491605	7.95901e-05	-0.000193663
0.929272	0.959987	0.925854	0.934765		0.89751	0.949297	0.968745	0.959782		0.902183	0.9578	0.975707	0.967079		0	0.0307151	-0.00341778	0.00549375		-0.031762	0.0200255	0.0394735	0.0305098		-0.0270887	0.0285278	0.0464349	0.0378078		0.000499153	0.00045483	0.00098736	0.00088137		0.00176008	0.00121975	0.000592131	0.00120412		0.00104703	0.000388886	0.000703659	0.000399259		0	-4.43236e-05	0.000488207	0.000382216
0.933353	0.955047	0.929204	0.931556		0.900836	0.953793	0.973848	0.968672		0.88661	0.958319	0.971994	0.960704		0	0.0216936	-0.00414931	-0.00179728		-0.0325174	0.02044	0.0404944	0.0353189		-0.0467433	0.0249656	0.0386404	0.0273502		0.000315553	0.000524934	0.00121686	0.000809191		0.0011975	0.00103315	0.000392117	0.00106354		0.00132199	0.0004768	0.000427943	0.000702631		0	0.000209382	0.000901302	0.000493639
0.924288	0.970106	0.926134	0.937456		0.909283	0.960642	0.975734	0.963404		0.897228	0.960578	0.97339	0.969535		0	0.0458176	0.00184573	0.0131675		-0.0150055	0.0363541	0.0514454	0.0391156		-0.0270607	0.0362895	0.0491016	0.0452464		0.000854358	0.000777498	0.00114567	0.000442776		0.00123588	0.000953292	0.000167691	0.000939698		0.00131768	0.000698849	0.00143434	0.00132779		0	-7.68597e-05	0.00029131	-0.000411582
0.917556	0.953647	0.93087	0.926536		0.894275	0.958666	0.969398	0.962784		0.893437	0.94722	0.975726	0.964675		0	0.036091	0.0133138	0.00897978		-0.0232811	0.0411092	0.0518412	0.0452272		-0.0241198	0.0296635	0.0581696	0.0471184		0.000723506	0.000402925	0.00135836	0.000945482		0.00105401	0.000733345	0.000379898	0.00060078		0.000370419	0.000873323	0.000642121	0.000504758		0	-0.000320581	0.00063485	0.000221976
0.932522	0.952922	0.92212	0.935027		0.904998	0.960837	0.961302	0.958476		0.890824	0.954463	0.988874	0.96481		0	0.0204002	-0.0104019	0.00250493		-0.0275238	0.0283153	0.0287807	0.0259545		-0.041698	0.0219418	0.0563523	0.0322882		0.00110835	0.000309489	0.00136759	0.00101143		0.00134109	0.00025964	0.00156784	0.00109718		0.00203496	0.000500831	0.000489043	0.000862394		0	-0.00079886	0.000259245	-9.69141e-05
0.930051	0.954663	0.920978	0.931902		0.896759	0.940733	0.965439	0.970153		0.894906	0.957439	0.978098	0.973542		0	0.0246118	-0.00907315	0.00185043		-0.0332924	0.0106823	0.0353879	0.040102		-0.0351449	0.0273878	0.0480466	0.0434906		0.000449742	0.000552077	0.00125755	0.00050333		0.000688168	0.000656835	0.000702499	0.000915884		0.00146631	0.000684143	0.000116944	0.00020398		0	0.000102335	0.000807807	5.35877e-05
0.925137	0.946561	0.933464	0.941956		0.894184	0.956267	0.956425	0.977664		0.884487	0.948963	0.97994	0.970546		0	0.0214234	0.00832687	0.0168187		-0.030953	0.0311292	0.0312875	0.0525264		-0.0406501	0.0238251	0.0548023	0.0454082		0.000872741	0.000316083	0.000987182	0.000765099		0.00157452	0.00173701	0.000768189	0.000962147		0.000986857	0.000382445	0.000222356	0.000459521		0	-0.000556657	0.000114442	-0.000107641
0.929949	0.952738	0.922834	0.924873		0.914288	0.946228	0.966043	0.965081		0.901911	0.946489	0.982757	0.966551		0	0.0227891	-0.00711518	-0.00507647		-0.0156615	0.0162785	0.0360938	0.0351318		-0.0280381	0.0165396	0.0528077	0.0366018		0.000851642	0.000674582	0.00113803	0.000760688		0.000680661	0.00170552	0.00106344	0.000705941		0.00174583	0.000750053	0.000316862	0.0011465		0	-0.00017706	0.000286389	-9.0954e-05
0.932382	0.947255	0.922797	0.934854		0.901532	0.942801	0.965821	0.969036		0.896939	0.95301	0.967547	0.96132		0	0.0148729	-0.00958422	0.00247215		-0.0308501	0.0104197	0.033439	0.0366543		-0.0354431	0.020628	0.0351656	0.0289379		0.000759208	0.000529462	0.00165831	0.000212583		0.000885327	0.000270154	0.000601637	0.00042318		0.000869732	0.000655709	0.000264167	0.000918197		0	-0.000229746	0.000899103	-0.000546625
0.914315	0.946394	0.921299	0.932521		0.91297	0.957783	0.963759	0.970149		0.887246	0.948232	0.991809	0.960272		0	0.0320794	0.0069844	0.0182059		-0.00134495	0.0434682	0.0494441	0.0558337		-0.0270687	0.0339171	0.0774943	0.0459566		0.00125244	0.000307103	0.00141153	0.00074399		0.00117893	0.000927264	0.000777074	0.000795726		0.00219778	0.000243695	0.000807049	0.000639826		0	-0.000945334	0.00015909	-0.000508446
0.923531	0.949831	0.925876	0.930529		0.88819	0.956423	0.967611	0.974205		0.905115	0.949031	0.977912	0.973325		0	0.0262998	0.00234571	0.00699818		-0.0353404	0.0328921	0.0440803	0.0506745		-0.0184154	0.0254997	0.0543816	0.0497939		0.00158519	0.000383189	0.00072233	0.000309952		0.00106366	0.000720713	0.000585515	0.000990256		0.00124722	0.000600097	0.000175591	0.000371694		0	-0.001202	-0.00086286	-0.00127524
0.926963	0.946116	0.917683	0.931263		0.901837	0.953879	0.970514	0.966945		0.898776	0.954474	0.97974	0.970353		0	0.0191533	-0.00928049	0.00430019		-0.0251265	0.0269155	0.0435512	0.0399815		-0.0281874	0.0275109	0.0527768	0.0433894		0.00135852	0.000517038	0.000851098	0.000398602		0.000611933	0.00152896	0.0005234	0.00111695		0.000700545	0.000700491	0.000134456	0.000306431		0	-0.000841481	-0.000507421	-0.000959917
0.924108	0.958362	0.923329	0.932661		0.910705	0.963781	0.958575	0.971111		0.899516	0.949049	0.984851	0.967024		0	0.034254	-0.000779078	0.00855286		-0.0134027	0.0396733	0.0344672	0.0470037		-0.0245917	0.0249411	0.0607434	0.0429163		0.000610907	0.000627512	0.00126898	0.00082012		0.00089319	0.000792078	0.00049452	0.000999737		0.00191437	0.000229728	0.000610342	0.000323382		0	1.66047e-05	0.000658074	0.000209213
0.937657	0.943819	0.922039	0.928117		0.901308	0.955191	0.970966	0.969286		0.902759	0.944835	0.983889	0.960732		0	0.00616194	-0.0156177	-0.00954016		-0.0363489	0.0175342	0.0333097	0.0316292		-0.0348975	0.00717787	0.0462318	0.0230756		0.00136882	0.000479552	0.000909316	0.000232913		0.000730615	0.00044109	0.000703688	0.000988117		0.000917587	0.00050167	0.000390173	0.00034712		0	-0.000889271	-0.000459507	-0.00113591
0.936162	0.952999	0.920945	0.944301		0.899951	0.958418	0.970869	0.96926		0.895155	0.950566	0.990072	0.963521		0	0.0168365	-0.0152169	0.0081391		-0.0362111	0.0222563	0.0347074	0.0330979		-0.0410071	0.0144044	0.0539105	0.0273587		0.000981052	0.000447825	0.00142992	0.000678444		0.00129481	0.000808511	0.000756466	0.000565762		0.00122228	0.000351956	0.000203581	0.000536574		0	-0.000533227	0.000448866	-0.000302608
0.917525	0.949953	0.928503	0.941022		0.90601	0.958461	0.959459	0.978232		0.904482	0.967839	0.973993	0.96187		0	0.0324285	0.0109782	0.0234975		-0.0115145	0.0409367	0.0419347	0.0607076		-0.0130424	0.0503138	0.0564683	0.044345		0.00143891	0.0003108	0.0015134	0.00115761		0.00213732	0.00101795	0.000765959	0.000976112		0.000875643	0.000403546	0.000182382	0.000499393		0	-0.00112811	7.4492e-05	-0.000281293
0.917228	0.954796	0.926729	0.943779		0.898877	0.948975	0.967667	0.968091		0.914291	0.949655	0.974914	0.963162		0	0.0375682	0.00950144	0.026552		-0.0183506	0.0317471	0.0504397	0.0508631		-0.00293638	0.0324279	0.0576866	0.0459345		0.00199699	0.000139451	0.00112747	0.000299773		0.00104648	0.00029697	0.000554183	0.00100628		0.0011069	0.000645164	0.000315018	0.000774406		0	-0.00185753	-0.000869516	-0.00169721
0.918996	0.94918	0.930153	0.93455		0.903384	0.960903	0.970794	0.966123		0.896545	0.947266	0.975177	0.964258		0	0.0301837	0.0111566	0.0155541		-0.0156127	0.041907	0.0517977	0.0471268		-0.0224512	0.0282698	0.0561804	0.0452614		0.000378732	0.000272463	0.00156283	0.000369336		0.00183233	0.00061823	0.000585534	0.000496292		0.00113845	0.000159941	0.00068324	0.000551837		0	-0.000106269	0.0011841	-9.39575e-06
0.92572	0.945552	0.927897	0.924878		0.888319	0.961607	0.976596	0.969582		0.892926	0.953896	0.96828	0.969511		0	0.0198324	0.00217724	-0.000841503		-0.0374009	0.0358867	0.0508759	0.0438621		-0.0327935	0.0281766	0.0425605	0.0437907		0.00115728	0.000214966	0.00096132	0.000560257		0.0016112	0.000428191	0.000364153	0.000792343		0.00160476	0.000599544	0.000242907	0.000359151		0	-0.00094231	-0.000195955	-0.000597019
0.914486	0.956087	0.929209	0.931762		0.909537	0.954302	0.971039	0.973055		0.901989	0.956426	0.976576	0.971015		0	0.0416015	0.0147228	0.0172761		-0.00494897	0.039816	0.0565527	0.0585688		-0.0124972	0.0419401	0.0620905	0.0565293		0.000856353	0.00035747	0.0012656	0.000433101		0.00158646	0.00133417	0.000313168	0.00086953		0.000575641	0.000657426	0.00036198	0.00045872		0	-0.000498882	0.00040925	-0.000423252
0.930922	0.953104	0.931262	0.925833		0.901599	0.963563	0.969597	0.975943		0.911386	0.963449	0.974958	0.977835		0	0.0221819	0.000340319	-0.005089		-0.0293227	0.0326408	0.038675	0.0450214		-0.0195354	0.0325272	0.0440358	0.046913		0.000947464	9.45955e-05	0.00145314	0.000459602		0.000866734	0.00116831	0.000599137	0.00134777		0.00152944	0.000458825	0.000235186	0.000841412		0	-0.000852869	0.000505672	-0.000487862
0.92642	0.960398	0.939218	0.920781		0.909889	0.967854	0.968601	0.971577		0.890872	0.96034	0.980649	0.971145		0	0.0339772	0.0127976	-0.00563961		-0.016531	0.0414334	0.0421811	0.0451565		-0.035548	0.0339196	0.0542287	0.0447251		0.000780209	0.000172047	0.00233939	0.000705912		0.00144968	0.000966292	0.000100029	0.000936466		0.00162948	0.000992302	0.00050253	0.000297463		0	-0.000608162	0.00155918	-7.42969e-05
0.925643	0.952884	0.922325	0.942496		0.893121	0.964617	0.974084	0.971298		0.890118	0.948921	0.969549	0.964776		0	0.027241	-0.00331736	0.0168534		-0.0325219	0.0389747	0.0484413	0.0456551		-0.0355243	0.0232786	0.0439062	0.0391339		0.0010478	0.000430247	0.00209916	0.00066654		0.0013462	0.000453911	0.000644884	0.00103028		0.00118274	0.000924347	0.000368144	0.000602861		0	-0.000617553	0.00105136	-0.00038126
0.935275	0.951674	0.930713	0.933994		0.89446	0.949812	0.974106	0.975655		0.903935	0.956264	0.969863	0.982107		0	0.0163987	-0.00456175	-0.00128105		-0.0408147	0.0145369	0.0388312	0.0403802		-0.0313399	0.0209894	0.0345883	0.0468314		0.00137337	0.00090679	0.000986696	0.000625312		0.000927725	0.000996252	0.000454498	0.00114342		0.00130122	0.000579795	0.000476734	0.00041533		0	-0.000466583	-0.000386677	-0.000748062
0.920998	0.94836	0.927688	0.937051		0.910728	0.972761	0.968697	0.973773		0.900502	0.963511	0.976073	0.972155		0	0.0273623	0.00668994	0.0160534		-0.0102691	0.0517633	0.0476999	0.0527759		-0.0204958	0.0425134	0.0550758	0.0511571		0.000600503	0.000882512	0.00114577	0.000442281		0.0017907	0.00123088	0.000757119	0.00092523		0.00195178	0.00067562	0.000601108	0.000920896		0	0.00028201	0.000545266	-0.000158222
0.925874	0.949056	0.925928	0.940439		0.891799	0.964484	0.962804	0.974112		0.899902	0.957821	0.977843	0.970782		0	0.023182	5.37974e-05	0.0145648		-0.0340749	0.0386098	0.03693	0.0482373		-0.0259725	0.0319462	0.0519684	0.0449076		0.000921839	0.000530273	0.00168178	0.000561127		0.00117074	0.000473287	0.000234263	0.000690138		0.00191748	0.000505983	0.000796604	0.000861759		0	-0.000391566	0.000759938	-0.000360712
0.934593	0.954049	0.939686	0.94213		0.899389	0.966135	0.979966	0.968387		0.893278	0.964589	0.979714	0.969333		0	0.0194554	0.0050931	0.00753694		-0.0352043	0.0315415	0.0453722	0.0337939		-0.0413154	0.029996	0.0451207	0.0347393		0.00100963	0.000440934	0.00133344	0.000681568		0.000453222	0.00164255	0.000157968	0.00137305		0.000883709	0.000808198	0.00026619	0.00149649		0	-0.000568697	0.000323812	-0.000328063
0.924211	0.958322	0.925345	0.931205		0.891442	0.975114	0.973908	0.974651		0.895829	0.951247	0.969784	0.972662		0	0.0341116	0.00113364	0.00699428		-0.0327694	0.0509028	0.0496976	0.0504406		-0.028382	0.0270359	0.0455734	0.0484512		0.00119638	0.000361315	0.000673565	0.00045385		0.000800904	0.000919942	0.000464755	0.00111656		0.00149191	0.000524449	0.000445156	0.000606588		0	-0.000835062	-0.000522811	-0.000742527
0.927373	0.963386	0.932234	0.932521		0.899872	0.950395	0.975432	0.982239		0.891969	0.963201	0.976396	0.970337		0	0.0360132	0.00486103	0.00514741		-0.0275008	0.0230213	0.0480587	0.0548654		-0.0354043	0.035828	0.0490227	0.0429641		0.00121108	0.000644338	0.00123411	0.000461611		0.000632035	0.00132352	0.000486184	0.000932678		0.0019101	0.00126153	0.000671713	0.000924859		0	-0.000566746	2.3028e-05	-0.000749473
0.926246	0.956569	0.919817	0.944393		0.921013	0.965637	0.966772	0.980688		0.897642	0.945035	0.970932	0.976071		0	0.0303227	-0.00642914	0.0181466		-0.00523294	0.0393907	0.0405258	0.0544414		-0.0286048	0.0187885	0.0446857	0.0498251		0.00134885	0.000308256	0.00127136	0.000413409		0.00049474	0.00101528	0.000287578	0.000918706		0.00052487	0.000594468	0.00100639	0.000518342		0	-0.00104059	-7.74895e-05	-0.000935442
0.929817	0.953909	0.926276	0.930507		0.905495	0.964482	0.969968	0.968121		0.893742	0.95118	0.966477	0.975706		0	0.0240912	-0.00354135	0.00068979		-0.0243224	0.0346648	0.0401502	0.0383038		-0.0360755	0.0213628	0.0366594	0.0458889		0.000928322	0.000450181	0.00112436	0.000467359		0.00106172	0.00040174	0.000489957	0.000826728		0.00300283	0.000317639	0.000641118	0.000292848		0	-0.000478142	0.000196037	-0.000460963
0.928063	0.94902	0.922263	0.927415		0.90815	0.954762	0.975637	0.975112		0.902389	0.956532	0.977981	0.972509		0	0.0209566	-0.00580015	-0.000647801		-0.0199129	0.0266988	0.047574	0.0470488		-0.0256736	0.0284694	0.0499179	0.0444463		0.00101344	9.8133e-05	0.00107897	0.000514157		0.000918716	0.000740437	0.00108711	0.00135896		0.000999556	0.000495172	0.000244911	0.000493711		0	-0.000915311	6.55248e-05	-0.000499287
0.929774	0.958756	0.932413	0.921234		0.901234	0.969835	0.970595	0.959202		0.891179	0.960697	0.969662	0.967733		0	0.0289825	0.00263966	-0.00853928		-0.02854	0.0400616	0.0408219	0.0294283		-0.0385942	0.0309238	0.0398884	0.0379597		0.000500821	0.000245707	0.00165967	0.00024442		0.00136171	0.000581153	0.000933382	0.000954254		0.00253874	0.000479338	0.000601072	0.000935238		0	-0.000255115	0.00115884	-0.000256401
0.927897	0.956163	0.924129	0.92593		0.904361	0.964874	0.965241	0.969823		0.903137	0.959335	0.957853	0.974944		0	0.028266	-0.00376807	-0.00196693		-0.0235352	0.0369778	0.0373449	0.0419264		-0.0247596	0.0314388	0.0299566	0.0470471		0.000766141	0.000496501	0.00125105	0.000198918		0.00114251	0.000561386	0.000717502	0.00108143		0.00136647	0.00040033	0.000837605	0.000966969		0	-0.000269639	0.000484913	-0.000567222
0.932373	0.956399	0.922293	0.924936		0.920666	0.955837	0.959047	0.979554		0.892036	0.950634	0.973958	0.97228		0	0.0240258	-0.0100801	-0.00743773		-0.0117073	0.0234636	0.0266734	0.0471808		-0.0403378	0.018261	0.0415843	0.0399069		0.00144586	0.000214242	0.00164623	0.000666092		0.00201392	0.000549968	0.000498039	0.00148989		0.00185322	0.000681065	0.000537677	0.000407628		0	-0.00123162	0.000200367	-0.000779769
0.929108	0.938194	0.927687	0.940473		0.908258	0.957106	0.965715	0.963315		0.910604	0.957036	0.971921	0.966813		0	0.0090863	-0.00142169	0.0113645		-0.0208498	0.0279975	0.0366066	0.0342065		-0.018504	0.0279282	0.0428124	0.0377047		0.000529723	0.000246773	0.00149659	0.000356498		0.00159957	0.00106068	0.000463765	0.000826128		0.00165347	0.00116324	0.000147825	0.00199796		0	-0.00028295	0.000966863	-0.000173226
0.92917	0.952668	0.926926	0.935865		0.915782	0.948057	0.961695	0.958405		0.89296	0.963273	0.988659	0.972598		0	0.0234981	-0.00224362	0.00669584		-0.0133875	0.0188874	0.0325254	0.0292357		-0.0362099	0.034103	0.0594896	0.0434283		0.00143043	0.000393257	0.00221176	0.000244887		0.000688832	0.000628737	0.000421025	0.000959912		0.000998981	0.000564616	0.000346811	0.00134981		0	-0.00103717	0.000781335	-0.00118554
0.929519	0.95407	0.917811	0.933923		0.89955	0.968915	0.965824	0.959522		0.892829	0.963524	0.972754	0.96297		0	0.0245504	-0.0117085	0.00440346		-0.0299695	0.0393958	0.0363053	0.0300032		-0.0366903	0.0340044	0.0432348	0.0334504		0.00142978	0.000720934	0.00142547	0.000427843		0.00091817	0.000424119	0.000195178	0.00130257		0.00321067	0.000795801	0.000246312	0.0012839		0	-0.000708851	-4.31442e-06	-0.00100194
0.937615	0.959003	0.928651	0.933276		0.898378	0.965685	0.96884	0.962835		0.899897	0.961895	0.969876	0.959702		0	0.0213879	-0.00896377	-0.00433857		-0.0392369	0.0280699	0.0312253	0.0252205		-0.0377182	0.0242799	0.0322608	0.0220876		0.00231558	0.00064594	0.00155811	0.000359475		0.00106998	0.00128554	0.000619735	0.000658351		0.000898512	0.000326652	0.000706956	0.00137118		0	-0.00166964	-0.000757472	-0.00195611
0.928144	0.958147	0.931949	0.940175		0.899838	0.951801	0.963369	0.974903		0.894928	0.955066	0.9745	0.963451		0	0.0300025	0.00380434	0.012031		-0.0283059	0.023657	0.0352244	0.0467586		-0.0332159	0.0269215	0.0463559	0.035307		0.000955853	0.000490218	0.00118424	0.000464134		0.000853795	0.00166139	0.00047799	0.00119985		0.00140376	0.000424237	0.00122698	0.00041429		0	-0.000465636	0.000228384	-0.000491719
0.916017	0.95812	0.920309	0.927145		0.912585	0.961135	0.968066	0.966211		0.909244	0.971776	0.975746	0.967385		0	0.0421031	0.00429208	0.011128		-0.00343144	0.0451179	0.0520494	0.0501946		-0.00677308	0.0557587	0.0597294	0.0513681		0.00142217	0.000443236	0.00158522	0.000125859		0.000965262	0.000567068	0.000562481	0.001272		0.00137929	0.000731155	0.000444765	0.00120281		0	-0.000978931	0.000163055	-0.00129631
0.93374	0.957615	0.923168	0.934827		0.909036	0.962395	0.96967	0.966636		0.896946	0.957272	0.975265	0.970581		0	0.0238752	-0.010572	0.00108703		-0.0247036	0.0286549	0.0359307	0.0328963		-0.0367936	0.0235325	0.0415257	0.0368415		0.00159254	0.000381476	0.0015301	0.000382671		0.000932825	0.000947372	0.000654801	0.00082437		0.0013641	0.000381213	0.000407094	0.00021399		0	-0.00121107	-6.24463e-05	-0.00120987
0.929307	0.950336	0.921954	0.929424		0.895989	0.955722	0.971906	0.969491		0.892972	0.96657	0.977417	0.978298		0	0.0210297	-0.00735285	0.000116894		-0.0333178	0.0264153	0.042599	0.0401846		-0.036335	0.037263	0.0481108	0.0489911		0.000986053	0.000332811	0.00154353	0.000818365		0.000929311	0.000881013	0.000696886	0.000663554		0.00165613	0.000584326	0.000404487	0.00086269		0	-0.000653242	0.000557475	-0.000167688
0.933918	0.959532	0.919651	0.923254		0.903311	0.950495	0.96762	0.967278		0.892871	0.947949	0.977223	0.968605		0	0.025614	-0.0142671	-0.0106637		-0.0306068	0.0165774	0.0337024	0.03336		-0.0410467	0.0140309	0.0433054	0.0346868		0.00122981	0.000386123	0.00178389	0.000238803		0.000889576	0.00164897	0.000673002	0.000677167		0.000845692	0.00051159	0.000626401	0.000279835		0	-0.000843688	0.000554081	-0.000991008
0.921229	0.9496	0.927047	0.936541		0.909262	0.942771	0.978106	0.960072		0.904045	0.954201	0.985895	0.969954		0	0.0283709	0.00581787	0.0153119		-0.0119669	0.0215412	0.0568768	0.0388428		-0.0171845	0.0329714	0.0646658	0.0487249		0.00102742	0.000349684	0.0019576	0.000268636		0.000989624	0.000741813	0.000581611	0.00109487		0.00151829	0.000585345	0.000833675	0.000566813		0	-0.000677737	0.000930175	-0.000758786
0.9363	0.95945	0.925505	0.932908		0.893496	0.966683	0.969296	0.967637		0.905042	0.964231	0.979434	0.971118		0	0.02315	-0.0107949	-0.00339215		-0.0428047	0.0303826	0.0329954	0.0313366		-0.0312578	0.0279306	0.0431335	0.0348177		0.000693628	0.000301922	0.000915968	0.000328666		0.0011417	0.000753557	0.000743882	0.000749282		0.00271478	0.0010267	0.000298268	0.000766689		0	-0.000391706	0.00022234	-0.000364962
0.929731	0.951108	0.927411	0.930523		0.896403	0.954626	0.961168	0.971344		0.897815	0.951685	0.975135	0.974893		0	0.0213777	-0.00231978	0.000792034		-0.033328	0.024895	0.0314376	0.0416134		-0.0319153	0.0219541	0.0454046	0.0451624		0.00101958	0.000296609	0.00136222	0.00033683		0.000710111	0.000552112	0.000537527	0.000979113		0.000787127	0.000850542	0.000782933	0.00033787		0	-0.000722975	0.00034264	-0.000682753
0.925822	0.958099	0.92749	0.927737		0.905452	0.945086	0.977808	0.967907		0.896278	0.965876	0.976583	0.971669		0	0.0322775	0.00166843	0.00191467		-0.0203694	0.0192638	0.0519856	0.0420854		-0.0295443	0.0400537	0.0507612	0.0458475		0.00127875	0.000203571	0.00124464	0.000529702		0.000841862	0.00130555	0.000313974	0.00136927		0.000753958	0.000856223	0.000286501	0.00105939		0	-0.00107518	-3.41108e-05	-0.000749052
0.927612	0.950927	0.928467	0.934847		0.903779	0.938539	0.97343	0.967859		0.906853	0.952185	0.97132	0.960499		0	0.0233146	0.000854653	0.00723461		-0.0238332	0.0109268	0.045818	0.0402467		-0.0207594	0.024573	0.0437075	0.0328863		0.000444941	0.000327296	0.00152564	0.000462193		0.00111761	0.00124163	0.000320054	0.000801019		0.00126174	0.000882265	0.000191118	0.00079087		0	-0.000117645	0.0010807	1.72525e-05
0.925747	0.962468	0.920206	0.932915		0.901259	0.941644	0.963846	0.965165		0.904579	0.96577	0.974191	0.974684		0	0.0367207	-0.00554135	0.00716808		-0.0244883	0.0158972	0.0380992	0.0394182		-0.0211678	0.0400232	0.0484445	0.0489372		0.00139924	0.000472995	0.00169051	0.000296623		0.00091132	0.00104973	0.000354459	0.000757084		0.00146337	0.00111988	0.000480887	0.000763156		0	-0.000926245	0.00029127	-0.00110262
0.92806	0.955932	0.929345	0.932213		0.893112	0.948489	0.981787	0.96768		0.900955	0.956988	0.975782	0.968844		0	0.0278723	0.00128542	0.00415356		-0.0349475	0.0204295	0.0537279	0.0396202		-0.0271042	0.0289283	0.0477222	0.0407846		0.000732363	0.000508976	0.00114046	0.000188993		0.000883235	0.000289857	0.000233491	0.000962935		0.00133051	0.000558517	0.000674537	0.000610786		0	-0.000223387	0.000408101	-0.00054337
0.924118	0.94928	0.924113	0.935072		0.913174	0.95875	0.973645	0.96937		0.905162	0.964728	0.964511	0.967197		0	0.025162	-5.01914e-06	0.0109545		-0.0109436	0.0346318	0.0495277	0.0452523		-0.0189554	0.0406104	0.0403935	0.0430794		0.00104827	0.000443115	0.00128812	0.000674451		0.000491026	0.00115073	0.000756159	0.000740238		0.00209991	0.000267049	0.000569058	0.000354909		0	-0.00060515	0.000239853	-0.000373815
0.93166	0.944484	0.930957	0.94186		0.909902	0.954203	0.968897	0.977047		0.903862	0.948271	0.968932	0.970683		0	0.0128234	-0.000703206	0.0101994		-0.0217581	0.0225431	0.0372371	0.0453869		-0.0277984	0.0166111	0.0372719	0.0390232		0.00117594	0.000573574	0.000859342	0.000498102		0.000964931	0.001698	0.0013438	0.00136451		0.00235894	0.00102156	0.00162583	0.000697577		0	-0.000602368	-0.0003166	-0.000677839
0.928211	0.956675	0.929935	0.927619		0.901945	0.953259	0.967597	0.969751		0.894061	0.973428	0.964346	0.970617		0	0.0284636	0.0017236	-0.000591632		-0.0262656	0.0250483	0.0393861	0.0415405		-0.0341496	0.0452173	0.0361352	0.0424057		0.00073945	0.000468817	0.00148356	0.000570021		0.000872899	0.000967412	0.000770159	0.000836889		0.00137981	0.000468997	0.000265342	0.000675193		0	-0.000270633	0.000744113	-0.000169429
0.92898	0.960511	0.927024	0.925474		0.900351	0.959986	0.977892	0.967081		0.904787	0.950503	0.970066	0.960943		0	0.0315307	-0.00195641	-0.00350686		-0.0286296	0.0310058	0.0489113	0.0381009		-0.0241938	0.0215228	0.0410852	0.0319628		0.00093927	0.000501055	0.0015057	0.000508632		0.000507513	0.00153437	0.000661194	0.000837122		0.000802197	0.000429139	0.000697919	0.0014174		0	-0.000438214	0.000566434	-0.000430637
0.92849	0.956866	0.925475	0.931961		0.915797	0.97157	0.967338	0.97057		0.89337	0.960161	0.968071	0.969828		0	0.0283763	-0.00301428	0.00347108		-0.012693	0.0430805	0.0388485	0.0420805		-0.0351196	0.031671	0.0395811	0.0413386		0.000906877	0.000554313	0.00102454	0.000391654		0.000606389	0.000821115	0.000282451	0.00132628		0.00172415	0.000455397	0.00113146	0.00106258		0	-0.000352564	0.00011766	-0.000515223
0.921773	0.959932	0.923384	0.927989		0.90813	0.95904	0.968916	0.961425		0.914755	0.949006	0.977399	0.964047		0	0.0381593	0.00161072	0.00621543		-0.013643	0.0372669	0.0471426	0.0396517		-0.00701816	0.027233	0.0556262	0.0422735		0.000506223	0.000627561	0.00149819	0.000765798		0.00138413	0.00132303	0.000523423	0.000872187		0.00197428	0.000346107	0.000700881	0.00122102		0	0.000121338	0.000991971	0.000259575
0.927859	0.951975	0.921762	0.94219		0.911215	0.962442	0.972796	0.956821		0.908484	0.963268	0.973063	0.975353		0	0.0241158	-0.00609748	0.0143309		-0.0166442	0.034583	0.0449367	0.0289617		-0.0193752	0.0354084	0.0452043	0.047494		0.00105843	0.000516641	0.00167608	0.000691513		0.000936825	0.000634441	0.00058256	0.000875254		0.000803371	0.000124751	0.000536033	0.000796195		0	-0.000541785	0.000617652	-0.000366912
0.930777	0.95558	0.924885	0.931735		0.908713	0.954923	0.976803	0.96012		0.901771	0.957376	0.96958	0.976252		0	0.024803	-0.00589263	0.000958123		-0.0220647	0.024146	0.0460256	0.0293429		-0.0290066	0.0265989	0.0388029	0.0454744		0.000341588	0.000135197	0.0022576	0.000896039		0.000838646	0.000787502	0.00107136	0.000984975		0.000500719	0.000583752	0.000655606	0.000688503		0	-0.000206391	0.00191601	0.000554452
0.932916	0.949765	0.927302	0.945883		0.921155	0.959714	0.975374	0.976708		0.90438	0.965186	0.984864	0.963472		0	0.0168492	-0.00561345	0.0129671		-0.0117611	0.0267977	0.0424581	0.0437924		-0.0285359	0.0322698	0.0519482	0.0305559		0.00154975	0.000378807	0.00166819	0.000566627		0.00074857	0.00114165	0.000576797	0.0012253		0.00142147	0.00049189	0.000479141	0.00101255		0	-0.00117094	0.00011844	-0.00098312
[truncated: 8 more columns]

## Sheet: MRC5 No UV
Cell 00						Cell 01						Cell 02						Cell 03						Cell 04						Cell 05						Cell 06						Cell 07						Cell 08
	paste BG		average pre-bleach				paste BG		average pre-bleach				paste BG		average pre-bleach				paste BG		average pre-bleach				paste BG		average pre-bleach				paste BG		average pre-bleach				paste BG		average pre-bleach				paste BG		average pre-bleach				paste BG
	1	14.21	414.545				1	10.014	302.199				1	12.58	374.434				1	13.675	318.528				1	12.958	564.93				1	11.818	370.631				1	12.63	230.11				1	11.803	302.336				1
	paste FRAP	RAW					paste FRAP	RAW					paste FRAP	RAW					paste FRAP	RAW					paste FRAP	RAW					paste FRAP	RAW					paste FRAP	RAW					paste FRAP	RAW					paste FRAP
Time	data here		minus BG	Normalized		Time	data here		minus BG	Normalized		Time	data here		minus BG	Normalized		Time	data here		minus BG	Normalized		Time	data here		minus BG	Normalized		Time	data here		minus BG	Normalized		Time	data here		minus BG	Normalized		Time	data here		minus BG	Normalized		Time	data here
0	1	449.819	435.609	1.05081		0	1	326.286	316.272	1.04657		0	1	418.286	405.706	1.08352		0	1	346.943	333.268	1.04628		0	1	640.763	627.805	1.1113		0	1	408.694	396.876	1.07081		0	1	258.836	246.206	1.06995		0	1	331.394	319.591	1.05707		0	1
0.0798342	2	468.376	454.166	1.09558		0.0817251	2	325.688	315.674	1.04459		0.0798342	2	413.4	400.82	1.07047		0.0798342	2	354.49	340.815	1.06997		0.0798342	2	618.891	605.933	1.07258		0.0798342	2	404.588	392.77	1.05973		0.0798342	2	255.589	242.959	1.05584		0.0779433	2	340.832	329.029	1.08829		0.0798342	2
0.171676	3	463.131	448.921	1.08292		0.171455	3	327.167	317.153	1.04948		0.173677	3	397.097	384.517	1.02693		0.170675	3	353.012	339.337	1.06533		0.171676	3	622.838	609.88	1.07957		0.171676	3	392.738	380.92	1.02776		0.171676	3	256.895	244.265	1.06151		0.170896	3	338.047	326.244	1.07908		0.171676	3
0.271522	4	444.965	430.755	1.0391		0.272192	4	318.441	308.427	1.02061		0.271522	4	395.16	382.58	1.02175		0.270521	4	337.384	323.709	1.01627		0.270521	4	600.071	587.113	1.03927		0.271522	4	374.589	362.771	0.978793		0.271522	4	253.472	240.842	1.04664		0.270852	4	321.465	309.662	1.02423		0.273523	4
0.371368	5	445.742	431.532	1.04098		0.369926	5	310.234	300.22	0.993452		0.372369	5	402.347	389.767	1.04095		0.370368	5	337.039	323.364	1.01518		0.370368	5	601.53	588.572	1.04185		0.371368	5	389.363	377.545	1.01865		0.372369	5	246.827	234.197	1.01776		0.37281	5	323.169	311.366	1.02987		0.371368	5
0.471215	6	440.106	425.896	1.02738		0.471664	6	307.468	297.454	0.984299		0.472215	6	390.136	377.556	1.00834		0.471215	6	339.507	325.832	1.02293		0.470214	6	603.09	590.132	1.04461		0.472215	6	379.099	367.281	0.990961		0.472215	6	251.726	239.096	1.03905		0.470765	6	328.015	316.212	1.0459		0.472215	6
0.571061	7	453.482	439.272	1.05965		0.5724	7	311.43	301.416	0.99741		0.572061	7	384.489	371.909	0.993255		0.571061	7	331.381	317.706	0.997419		0.571061	7	585.22	572.262	1.01298		0.572061	7	394.658	382.84	1.03294		0.572061	7	246.559	233.929	1.0166		0.570722	7	334.678	322.875	1.06793		0.572061	7
0.671908	8	439.076	424.866	1.0249		0.672136	8	307.498	297.484	0.984398		0.671908	8	390.833	378.253	1.0102		0.670907	8	326.477	312.802	0.982024		0.671908	8	592.709	579.751	1.02623		0.671908	8	381.161	369.343	0.996525		0.671908	8	256.425	243.795	1.05947		0.670679	8	320.103	308.3	1.01973		0.673909	8
0.771754	9	434.803	420.593	1.01459		0.770872	9	316.593	306.579	1.01449		0.771754	9	378.591	366.011	0.977503		0.770753	9	332.088	318.413	0.999639		0.770753	9	593.834	580.876	1.02823		0.771754	9	368.742	356.924	0.963017		0.771754	9	247.253	234.623	1.01961		0.770635	9	320.995	309.192	1.02268		0.771754	9
0.8716	10	443.018	428.808	1.03441		0.870608	10	312.333	302.319	1.0004		0.8716	10	388.647	376.067	1.00436		0.8706	10	331.099	317.424	0.996534		0.8706	10	583.17	570.212	1.00935		0.8716	10	384.73	372.912	1.00615		0.872601	10	246.987	234.357	1.01846		0.870592	10	312.601	300.798	0.994913		0.8716	10
0.971447	11	439.677	425.467	1.02635		0.970344	11	307.574	297.56	0.98465		0.972447	11	388.306	375.726	1.00345		0.971447	11	327.675	314	0.985785		0.970446	11	581.897	568.939	1.0071		0.972447	11	377.204	365.386	0.985848		0.970446	11	236.514	223.884	0.972943		0.970548	11	319.489	307.686	1.0177		0.971447	11
1.07129	12	427.41	413.2	0.996755		1.07108	12	319.436	309.422	1.0239		1.07229	12	396.509	383.929	1.02536		1.07129	12	331.191	317.516	0.996823		1.07129	12	587.384	574.426	1.01681		1.07029	12	375.812	363.994	0.982092		1.07229	12	257.724	245.094	1.06512		1.07151	12	314.638	302.835	1.00165		1.07229	12
1.17214	13	428.919	414.709	1.0004		1.17182	13	314.903	304.889	1.0089		1.17214	13	394.373	381.793	1.01965		1.17114	13	328.567	314.892	0.988585		1.17114	13	588.55	575.592	1.01887		1.17214	13	383.722	371.904	1.00343		1.17214	13	245.587	232.957	1.01237		1.17146	13	319.408	307.605	1.01743		1.17214	13
1.27199	14	419.777	405.567	0.978342		1.27055	14	310.679	300.665	0.994925		1.27199	14	391.389	378.809	1.01168		1.27099	14	337.867	324.192	1.01778		1.27099	14	578.729	565.771	1.00149		1.27199	14	389.2	377.382	1.01821		1.27199	14	244.223	231.593	1.00644		1.27142	14	321.503	309.7	1.02436		1.27199	14
1.37183	15	438.24	424.03	1.02288		1.37029	15	311.293	301.279	0.996956		1.37183	15	389.667	377.087	1.00708		1.37083	15	337.548	323.873	1.01678		1.37283	15	578.707	565.749	1.00145		1.37183	15	388.97	377.152	1.01759		1.37283	15	248.81	236.18	1.02638		1.37138	15	308.407	296.604	0.981041		1.37183	15
1.47168	16	413.622	399.412	0.963494		1.47102	16	325.499	315.485	1.04397		1.47268	16	372.567	359.987	0.961415		1.47168	16	335.075	321.4	1.00902		1.47068	16	570.757	557.799	0.987377		1.47268	16	377.73	365.912	0.987267		1.47268	16	240.998	228.368	0.992429		-6468.35	16	314.362	302.559	1.00074		1.47168	16
1.57052	17	433.242	419.032	1.01082		1.57076	17	303.163	293.149	0.970053		1.57253	17	394.776	382.196	1.02073		1.57153	17	328.509	314.834	0.988403		1.57153	17	584.488	571.53	1.01168		1.57253	17	391.496	379.678	1.02441		1.57253	17	230.555	217.925	0.947046		1.57129	17	302.818	291.015	0.962555		1.57253	17
1.67137	18	422.71	408.5	0.985417		1.6725	18	317.815	307.801	1.01854		1.67237	18	379.592	367.012	0.980177		1.67137	18	327.045	313.37	0.983807		1.67137	18	578.021	565.063	1.00024		1.67237	18	378.565	366.747	0.98952		1.67237	18	236.923	224.293	0.97472		1.67125	18	316.938	305.135	1.00926		1.67237	18
1.77222	19	428.456	414.246	0.999278		1.77123	19	307.638	297.624	0.984862		1.77222	19	378.477	365.897	0.977199		1.77122	19	335.797	322.122	1.01128		1.77122	19	567.404	554.446	0.981442		1.77022	19	381.048	369.23	0.99622		1.77222	19	243.47	230.84	1.00317		1.7712	19	313.617	301.814	0.998274		1.77222	19
1.87206	20	435.499	421.289	1.01627		1.87097	20	304.128	294.114	0.973247		1.87206	20	384.489	371.909	0.993255		1.87106	20	332.756	319.081	1.00174		1.87106	20	562.945	549.987	0.973549		1.87206	20	380.744	368.926	0.995399		1.87307	20	242.598	229.968	0.999382		1.87116	20	310.209	298.406	0.987002		1.87206	20
2.03132	21	288.017	273.807	0.6605		2.034	21	196.686	186.672	0.617713		2.03132	21	270.123	257.543	0.687819		2.03032	21	223.993	210.318	0.660281		2.03032	21	392.205	379.247	0.671317		2.03132	21	260.967	249.149	0.672229		2.03232	21	171.702	159.072	0.691286		2.02663	21	217.276	205.473	0.679618		2.03132	21
2.11115	22	315.098	300.888	0.725827		2.11573	22	219.435	209.421	0.692991		2.11115	22	282.727	270.147	0.72148		2.11015	22	243.837	230.162	0.72258		2.11015	22	415.332	402.374	0.712254		2.11115	22	280.389	268.571	0.724632		2.11215	22	177.808	165.178	0.717821		2.10457	22	238.144	226.341	0.748641		2.11115	22
2.19799	23	334.705	320.495	0.773124		2.20146	23	237.447	227.433	0.752594		2.19999	23	299.534	286.954	0.766366		2.19899	23	241.452	227.777	0.715093		2.19899	23	450.587	437.629	0.77466		2.19999	23	287.988	276.17	0.745134		2.20199	23	194.676	182.046	0.791125		2.19552	23	234.093	222.29	0.735242		2.19999	23
2.29984	24	343.684	329.474	0.794784		2.30319	24	243.7	233.686	0.773286		2.29984	24	296.663	284.083	0.758699		2.29884	24	248.992	235.317	0.738764		2.29884	24	454.053	441.095	0.780796		2.29984	24	292.603	280.785	0.757586		2.30184	24	203.12	190.49	0.827821		2.29548	24	243.921	232.118	0.767749		2.29984	24
2.39968	25	351.257	337.047	0.813052		2.40393	25	245.688	235.674	0.779864		2.39968	25	299.808	287.228	0.767098		2.39868	25	258.818	245.143	0.769612		2.39868	25	472.034	459.076	0.812624		2.39968	25	305.226	293.408	0.791644		2.40168	25	204.252	191.622	0.83274		2.39544	25	253.537	241.734	0.799554		2.39968	25
2.49753	26	344.753	330.543	0.797363		2.50166	26	251.505	241.491	0.799113		2.50053	26	304.647	292.067	0.780022		2.49853	26	269.514	255.839	0.803192		2.49853	26	477.271	464.313	0.821894		2.50053	26	305.777	293.959	0.793131		2.50153	26	211.022	198.392	0.862161		2.49539	26	258.714	246.911	0.816678		2.49953	26
2.59938	27	357.71	343.5	0.828619		2.6034	27	259.376	249.362	0.825159		2.60038	27	319.593	307.013	0.819938		2.59938	27	268.084	254.409	0.798702		2.59938	27	502.812	489.854	0.867105		2.60038	27	308.772	296.954	0.801212		2.60238	27	201.894	189.264	0.822493		2.59635	27	270.386	258.583	0.855284		2.60038	27
2.69822	28	366.804	352.594	0.850556		2.70314	28	255.133	245.119	0.811118		2.70022	28	318.872	306.292	0.818012		2.69922	28	273.81	260.135	0.816679		2.69922	28	500.677	487.719	0.863326		2.70022	28	316.077	304.259	0.820921		2.70222	28	211.999	199.369	0.866407		2.69631	28	267.642	255.839	0.846208		2.70022	28
2.80007	29	366.812	352.602	0.850576		2.80187	29	263.109	253.095	0.837512		2.80007	29	324.527	311.947	0.833115		2.79907	29	278.852	265.177	0.832508		2.79707	29	501.469	488.511	0.864728		2.80007	29	320.204	308.386	0.832056		2.80207	29	204.9	192.27	0.835556		2.79626	29	274.913	263.11	0.870257		2.80007	29
2.89992	30	376.664	362.454	0.874341		2.90361	30	258.692	248.678	0.822895		2.89992	30	339.029	326.449	0.871845		2.89891	30	273.994	260.319	0.817256		2.89891	30	506.096	493.138	0.872918		2.89992	30	313.52	301.702	0.814022		2.90092	30	211.522	198.892	0.864334		2.89622	30	260.486	248.683	0.822539		2.89992	30
2.99976	31	356.267	342.057	0.825138		3.00235	31	261.468	251.454	0.832081		3.00076	31	330.206	317.626	0.848282		2.99876	31	290.911	277.236	0.870366		2.99876	31	502.368	489.41	0.866319		2.99976	31	322.73	310.912	0.838872		3.00176	31	210.213	197.583	0.858645		2.99618	31	257.697	245.894	0.813314		2.99976	31
3.09961	32	394.706	380.496	0.917864		3.10408	32	270.178	260.164	0.860903		3.10061	32	334.98	322.4	0.861032		3.09961	32	287.11	273.435	0.858433		3.09961	32	523.374	510.416	0.903503		3.10061	32	325.705	313.887	0.846899		3.10261	32	210.048	197.418	0.857928		3.09413	32	274.079	262.276	0.867499		3.10061	32
3.19845	33	380.758	366.548	0.884217		3.20382	33	269.94	259.926	0.860116		3.20046	33	334.714	322.134	0.860321		3.19745	33	286.526	272.851	0.8566		3.19945	33	515.817	502.859	0.890126		3.20046	33	334.631	322.813	0.870982		3.20246	33	210.298	197.668	0.859015		3.19609	33	274.444	262.641	0.868706		3.20046	33
3.3003	34	382.995	368.785	0.889613		3.30255	34	265.944	255.93	0.846893		3.3003	34	332.732	320.152	0.855028		3.2993	34	302.228	288.553	0.905895		3.2973	34	515.832	502.874	0.890152		3.2983	34	320.217	308.399	0.832092		3.3023	34	214.203	201.573	0.875985		3.29605	34	267.72	255.917	0.846466		3.3003	34
3.39815	35	383.955	369.745	0.891929		3.40429	35	269.233	259.219	0.857776		3.40015	35	341.901	329.321	0.879516		3.39915	35	287.735	274.06	0.860395		3.39915	35	524.542	511.584	0.90557		3.39915	35	322.435	310.617	0.838076		3.40115	35	219.791	207.161	0.900269		3.396	35	271.5	259.697	0.858968		3.40015	35
3.49799	36	374.75	360.54	0.869724		3.50203	36	273.389	263.375	0.871529		3.50099	36	336.416	323.836	0.864867		3.49799	36	288.892	275.217	0.864028		3.49799	36	520.532	507.574	0.898472		3.49999	36	327.124	315.306	0.850727		3.502	36	216.809	204.179	0.88731		3.49596	36	258.69	246.887	0.816598		3.49999	36
3.59984	37	368.429	354.219	0.854476		3.60376	37	276.962	266.948	0.883352		3.60084	37	344.912	332.332	0.887557		3.59984	37	297.589	283.914	0.891331		3.59984	37	516.759	503.801	0.891793		3.59884	37	328.899	317.081	0.855516		3.60284	37	217.527	204.897	0.89043		3.59592	37	273.367	261.564	0.865144		3.60084	37
3.69869	38	384.203	369.993	0.892528		3.7025	38	275.144	265.13	0.877336		3.70069	38	333.972	321.392	0.85834		3.69769	38	287.695	274.02	0.86027		3.69969	38	529.055	516.097	0.913559		3.70069	38	332.902	321.084	0.866317		3.70269	38	206.542	193.912	0.842692		3.69487	38	279.745	267.942	0.886239		3.70069	38
3.80053	39	396.226	382.016	0.92153		3.80224	39	284.306	274.292	0.907654		3.80053	39	348.322	335.742	0.896664		3.79953	39	287.085	273.41	0.858355		3.79753	39	508.014	495.056	0.876314		3.79853	39	325.647	313.829	0.846742		3.80053	39	212.012	199.382	0.866463		3.79683	39	274.145	262.342	0.867717		3.79853	39
3.89838	40	384.594	370.384	0.893471		3.90397	40	274.521	264.507	0.875275		3.90038	40	342.749	330.169	0.88178		3.89938	40	293.325	279.65	0.877945		3.89938	40	512.752	499.794	0.8847		3.89938	40	326.903	315.085	0.850131		3.90138	40	224.815	212.185	0.922102		3.89679	40	277.226	265.423	0.877908		3.90038	40
3.99822	41	381.14	366.93	0.885139		4.00271	41	268.188	258.174	0.854318		4.00123	41	335.594	323.014	0.862672		3.99822	41	294.93	281.255	0.882984		3.99822	41	518.587	505.629	0.895029		4.00023	41	327.991	316.173	0.853067		4.00223	41	223.598	210.968	0.916813		3.99474	41	282.577	270.774	0.895607		4.00023	41
4.09907	42	374.426	360.216	0.868943		4.10244	42	264.468	254.454	0.842009		4.09907	42	340.279	327.699	0.875184		4.10007	42	294.486	280.811	0.88159		4.10007	42	531.468	518.51	0.91783		4.09907	42	328.503	316.685	0.854448		4.10107	42	221.604	208.974	0.908147		4.0947	42	272.048	260.245	0.860781		4.10107	42
4.19892	43	393.081	378.871	0.913944		4.20218	43	273.787	263.773	0.872846		4.20092	43	344.166	331.586	0.885565		4.19792	43	296.142	282.467	0.886789		4.19792	43	521.478	508.52	0.900147		4.20092	43	336.841	325.023	0.876945		4.20292	43	220.09	207.46	0.901568		4.19666	43	283.994	272.191	0.900293		4.19892	43
4.29876	44	392.598	378.388	0.912779		4.30292	44	274.23	264.216	0.874312		4.29976	44	341.39	328.81	0.878151		4.29976	44	299.735	286.06	0.898069		4.29776	44	514.285	501.327	0.887414		4.29876	44	341.223	329.405	0.888768		4.30077	44	228.332	215.702	0.937386		4.29461	44	296.677	284.874	0.942243		4.29876	44
4.40061	45	392.096	377.886	0.911568		4.40265	45	269.817	259.803	0.859709		4.39961	45	354.947	342.367	0.914358		4.39861	45	291.703	278.028	0.872853		4.39961	45	536.843	523.885	0.927345		4.39961	45	326.281	314.463	0.848453		4.40061	45	216.382	203.752	0.885454		4.39457	45	285.838	274.035	0.906393		4.39961	45
4.49846	46	374.22	360.01	0.868446		4.50239	46	267.9	257.886	0.853365		4.50146	46	354.001	341.421	0.911831		4.49846	46	304.008	290.333	0.911483		4.49846	46	540.794	527.836	0.934338		4.49946	46	359.609	347.791	0.938375		4.50146	46	215.301	202.671	0.880756		4.49553	46	277.147	265.344	0.877646		4.50046	46
4.5993	47	391.594	377.384	0.910357		4.60313	47	274.258	264.244	0.874405		4.5993	47	349.1	336.52	0.898742		4.5983	47	299.065	285.39	0.895965		4.5983	47	526.96	514.002	0.90985		4.5993	47	345.865	334.047	0.901292		4.60131	47	227.103	214.473	0.932045		4.59548	47	289.304	277.501	0.917857		4.60131	47
4.69915	48	388.221	374.011	0.90222		4.70286	48	281.169	271.155	0.897274		4.70115	48	347.281	334.701	0.893884		4.69815	48	298.288	284.613	0.893526		4.69815	48	541.394	528.436	0.935401		4.70115	48	340.712	328.894	0.887389		4.70115	48	230.095	217.465	0.945047		4.69544	48	288.578	276.775	0.915455		4.70115	48
4.799	49	395.522	381.312	0.919832		4.8026	49	270.387	260.373	0.861595		4.801	49	347.502	334.922	0.894474		4.8	49	291.906	278.231	0.87349		4.798	49	536.313	523.355	0.926406		4.799	49	337.003	325.185	0.877382		4.801	49	228.192	215.562	0.936777		4.7954	49	290.226	278.423	0.920906		4.799	49
4.89884	50	387.972	373.762	0.901619		4.90333	50	274.84	264.826	0.87633		4.89984	50	351.453	338.873	0.905026		4.89884	50	296.789	283.114	0.88882		4.89984	50	525.819	512.861	0.907831		4.89984	50	334.383	322.565	0.870313		4.90084	50	220.842	208.212	0.904836		4.89535	50	283.44	271.637	0.898461		4.90084	50
4.99869	51	382.84	368.63	0.88924		5.00307	51	280.788	270.774	0.896013		5.00169	51	346.672	334.092	0.892258		4.99869	51	294.095	280.42	0.880362		4.99869	51	534.14	521.182	0.92256		4.99969	51	331.815	319.997	0.863384		5.00169	51	212.331	199.701	0.867849		4.99531	51	286.08	274.277	0.907193		4.99969	51
5.09954	52	393.555	379.345	0.915087		5.10281	52	290.077	280.063	0.926751		5.09954	52	351.438	338.858	0.904986		5.09854	52	303.775	290.1	0.910752		5.09854	52	532.755	519.797	0.920108		5.09954	52	336.851	325.033	0.876972		5.10154	52	230.052	217.422	0.94486		5.09527	52	279.447	267.644	0.885254		5.10154	52
5.19938	53	384.45	370.24	0.893123		5.20254	53	285.989	275.975	0.913223		5.20138	53	355.507	342.927	0.915853		5.19838	53	299.585	285.91	0.897598		5.19838	53	537.888	524.93	0.929194		5.19938	53	339.269	327.451	0.883496		5.20138	53	226.361	213.731	0.92882		5.19522	53	288.445	276.642	0.915015		5.19938	53
5.29923	54	378.029	363.819	0.877634		5.30328	54	276.78	266.766	0.88275		5.30023	54	357.152	344.572	0.920246		5.29823	54	292.082	278.407	0.874042		5.29823	54	531.706	518.748	0.918251		5.29923	54	349.636	337.818	0.911467		5.30123	54	213.767	201.137	0.87409		5.29518	54	275.725	263.922	0.872943		5.29923	54
5.39907	55	383.038	368.828	0.889717		5.40301	55	270.155	260.141	0.860827		5.40008	55	344.167	331.587	0.885567		5.39907	55	296.847	283.172	0.889002		5.39807	55	526.519	513.561	0.90907		5.40008	55	346.126	334.308	0.901997		5.40108	55	226.521	213.891	0.929516		5.39514	55	288.559	276.756	0.915392		5.40008	55
5.49892	56	393.816	379.606	0.915717		5.50275	56	268.369	258.355	0.854917		5.49992	56	352.657	340.077	0.908242		5.49892	56	291.262	277.587	0.871468		5.49892	56	517.509	504.551	0.893121		5.49992	56	333.639	321.821	0.868305		5.50192	56	213.17	200.54	0.871495		5.49509	56	276.596	264.793	0.875824		5.49992	56
5.59977	57	396.613	382.403	0.922464		5.60349	57	276.569	266.555	0.882052		5.59977	57	349.562	336.982	0.899976		5.59877	57	296.346	282.671	0.887429		5.59877	57	522.456	509.498	0.901878		5.59977	57	344.945	333.127	0.89881		5.60177	57	224.578	211.948	0.921072		5.59505	57	289.235	277.432	0.917628		5.59977	57
5.69961	58	401.123	386.913	0.933343		5.70322	58	280.529	270.515	0.895156		5.69961	58	349.631	337.051	0.90016		5.69861	58	298.678	285.003	0.89475		5.69861	58	523.779	510.821	0.90422		5.69961	58	339.562	327.744	0.884286		5.70162	58	225.804	213.174	0.9264		5.69601	58	291.893	280.09	0.92642		5.69961	58
5.79946	59	380.296	366.086	0.883103		5.80296	59	274.949	264.935	0.876691		5.79946	59	361.038	348.458	0.930625		5.79846	59	298.41	284.735	0.893909		5.79846	59	537.367	524.409	0.928272		5.79946	59	343.79	331.972	0.895694		5.80146	59	234.534	221.904	0.964338		5.79596	59	281.327	269.524	0.891472		5.79946	59
5.89931	60	386.406	372.196	0.897842		5.9037	60	282.409	272.395	0.901377		5.90031	60	340.965	328.385	0.877016		5.89931	60	298.398	284.723	0.893871		5.89831	60	534.116	521.158	0.922518		5.90031	60	346.892	335.074	0.904063		5.90131	60	218.48	205.85	0.894571		5.89592	60	289.791	277.988	0.919467		5.89931	60
5.99915	61	396.611	382.401	0.922459		6.00343	61	275.065	265.051	0.877075		6.00015	61	341.142	328.562	0.877489		5.99915	61	301.496	287.821	0.903597		5.99915	61	543.6	530.642	0.939305		6.00015	61	335.175	323.357	0.87245		6.00216	61	213.806	201.176	0.874259		5.99588	61	293.367	281.564	0.931295		6.00015	61
6.1	62	376.409	362.199	0.873726		6.10317	62	282.868	272.854	0.902896		6.1	62	354.973	342.393	0.914427		6.099	62	299.065	285.39	0.895965		6.099	62	531.423	518.465	0.917751		6.1	62	335.301	323.483	0.87279		6.102	62	217.93	205.3	0.892181		6.09583	62	294.148	282.345	0.933879		6.1	62
6.19985	63	378.897	364.687	0.879728		6.2039	63	281.658	271.644	0.898892		6.19985	63	345.641	333.061	0.889504		6.19885	63	313.206	299.531	0.94036		6.19885	63	533.944	520.986	0.922213		6.19985	63	335.101	323.283	0.87225		6.20185	63	222.178	209.548	0.910642		6.19579	63	285.705	273.902	0.905953		6.19985	63
6.29969	64	405.628	391.418	0.944211		6.30164	64	273.086	263.072	0.870526		6.29969	64	342.284	329.704	0.880539		6.29869	64	291.915	278.24	0.873518		6.29869	64	530.851	517.893	0.916738		6.29969	64	352.291	340.473	0.91863		6.30169	64	223.933	211.303	0.918269		6.29575	64	288.198	276.395	0.914198		6.29969	64
6.39954	65	391.7	377.49	0.910612		6.40338	65	270.686	260.672	0.862584		6.40054	65	337.116	324.536	0.866736		6.39954	65	309.286	295.611	0.928053		6.39854	65	522.032	509.074	0.901127		6.39854	65	345.716	333.898	0.90089		6.40154	65	223.547	210.917	0.916591		6.3957	65	297	285.197	0.943312		6.39954	65
6.49838	66	378.552	364.342	0.878896		6.50311	66	276.101	266.087	0.880503		6.50039	66	356.353	343.773	0.918113		6.49738	66	308.277	294.602	0.924886		6.49939	66	523.509	510.551	0.903742		6.50039	66	329.582	317.764	0.857359		6.50239	66	218.112	205.482	0.892972		6.49566	66	275.901	264.098	0.873525		6.50039	66
6.59923	67	381.19	366.98	0.885259		6.60385	67	273.63	263.616	0.872326		6.60023	67	345.844	333.264	0.890046		6.59923	67	293.31	279.635	0.877898		6.59923	67	528.526	515.568	0.912622		6.60023	67	343.818	332	0.895769		6.60223	67	220.83	208.2	0.904784		6.59562	67	276.948	265.145	0.876988		6.60023	67
6.70008	68	385.435	371.225	0.895499		6.70158	68	280.947	270.933	0.896539		6.70008	68	342.884	330.304	0.882141		6.69908	68	302.698	289.023	0.907371		6.69908	68	538.208	525.25	0.929761		6.70008	68	340.999	329.181	0.888163		6.70208	68	221.863	209.233	0.909273		6.69557	68	288.513	276.71	0.91524		6.70008	68
6.79992	69	393.385	379.175	0.914677		6.80232	69	275.59	265.576	0.878812		6.79992	69	352.443	339.863	0.90767		6.79892	69	305.195	291.52	0.91521		6.79792	69	531.105	518.147	0.917188		6.79992	69	327.118	315.3	0.850711		6.80193	69	212.287	199.657	0.867658		6.79553	69	288.275	276.472	0.914453		6.79992	69
6.89977	70	375.235	361.025	0.870894		6.90406	70	278.329	268.315	0.887876		6.90077	70	345.01	332.43	0.887819		6.89877	70	292.518	278.843	0.875411		6.89877	70	541.693	528.735	0.93593		6.89877	70	338.814	326.996	0.882268		6.90077	70	218.416	205.786	0.894293		6.89649	70	284.011	272.208	0.90035		6.89977	70
6.99962	71	381.649	367.439	0.886367		7.00179	71	269.638	259.624	0.859117		7.00062	71	363.883	351.303	0.938223		6.99962	71	289.878	276.203	0.867123		6.99762	71	538.427	525.469	0.930149		7.00062	71	362.284	350.466	0.945593		7.00262	71	210.841	198.211	0.861374		6.99644	71	281.667	269.864	0.892597		7.00062	71
7.09946	72	386.87	372.66	0.898961		7.10353	72	272.111	262.097	0.8673		7.10046	72	364.066	351.486	0.938712		7.09946	72	304.054	290.379	0.911628		7.09946	72	535.339	522.381	0.924682		7.10046	72	351.508	339.69	0.916518		7.10046	72	228.116	215.486	0.936447		7.0944	72	290.427	278.624	0.921571		7.10046	72
7.19831	73	391.039	376.829	0.909018		7.20427	73	271.111	261.097	0.863991		7.20031	73	356.234	343.654	0.917795		7.19731	73	299.532	285.857	0.897431		7.19931	73	543.435	530.477	0.939013		7.20031	73	341.652	329.834	0.889925		7.20231	73	219.29	206.66	0.898091		7.19636	73	290.058	278.255	0.920351		7.20031	73
7.30016	74	393.058	378.848	0.913888		7.302	74	268.702	258.688	0.856019		7.30016	74	351.019	338.439	0.903867		7.29916	74	306.901	293.226	0.920566		7.29816	74	538.689	525.731	0.930612		7.30016	74	353.942	342.124	0.923085		7.30116	74	228.677	216.047	0.938885		7.29631	74	287.14	275.337	0.910699		7.30016	74
7.398	75	389.906	375.696	0.906285		7.40274	75	274.999	264.985	0.876857		7.399	75	353.951	341.371	0.911698		7.399	75	306.164	292.489	0.918252		7.399	75	556.175	543.217	0.961565		7.399	75	351.589	339.771	0.916736		7.401	75	228.227	215.597	0.936929		7.39627	75	284.458	272.655	0.901828		7.4	75
7.49885	76	378.324	364.114	0.878346		7.50247	76	264.941	254.927	0.843574		7.50085	76	347.547	334.967	0.894594		7.49785	76	301.449	287.774	0.90345		7.49985	76	536.658	523.7	0.927017		7.50085	76	362.757	350.939	0.946869		7.50285	76	223.88	211.25	0.918038		7.49422	76	277.7	265.897	0.879475		7.49885	76
7.5987	77	395.561	381.351	0.919926		7.60421	77	274.316	264.302	0.874596		7.5987	77	344.7	332.12	0.886991		7.5997	77	312.038	298.363	0.936693		7.5997	77	535.784	522.826	0.92547		7.5987	77	339.232	327.414	0.883396		7.6027	77	231.637	219.007	0.951748		7.59518	77	284.616	272.813	0.902351		7.6007	77
7.69854	78	384.879	370.669	0.894158		7.70295	78	269.32	259.306	0.858064		7.70054	78	352.561	339.981	0.907985		7.69954	78	296.436	282.761	0.887712		7.69954	78	546.494	533.536	0.944428		7.70054	78	347.844	336.026	0.906632		7.70254	78	225.808	213.178	0.926417		7.69614	78	284.987	273.184	0.903578		7.70054	78
7.80039	79	398.369	384.159	0.9267		7.80268	79	279.951	269.937	0.893243		7.80039	79	350.296	337.716	0.901936		7.79939	79	310.232	296.557	0.931023		7.79839	79	543.745	530.787	0.939562		7.80039	79	354.613	342.795	0.924895		7.80139	79	221.299	208.669	0.906822		7.79509	79	289.661	277.858	0.919037		-6614.98	79
7.89823	80	393.928	379.718	0.915987		7.90242	80	270.679	260.665	0.862561		7.90124	80	346.579	333.999	0.892009		7.89823	80	315.052	301.377	0.946155		7.89923	80	556.342	543.384	0.96186		7.89923	80	350.332	338.514	0.913345		7.90124	80	220.885	208.255	0.905023		7.89605	80	289.209	277.406	0.917542		7.90024	80
7.99908	81	384.658	370.448	0.893625		8.00215	81	276.589	266.575	0.882118		8.00108	81	353.565	340.985	0.910667		7.99808	81	308.525	294.85	0.925664		8.00008	81	532.995	520.037	0.920533		7.99908	81	340.629	328.811	0.887165		8.00308	81	217.598	204.968	0.890738		7.99501	81	293.069	281.266	0.93031		7.99908	81
8.09993	82	383.923	369.713	0.891852		8.10389	82	282.334	272.32	0.901129		8.10093	82	351.286	338.706	0.90458		8.09793	82	310.44	296.765	0.931676		8.09993	82	541.14	528.182	0.934951		8.09893	82	349.924	338.106	0.912244		8.10093	82	216.108	203.478	0.884263		8.09496	82	293.217	281.414	0.930799		8.10093	82
8.19877	83	393.346	379.136	0.914583		8.20263	83	280.796	270.782	0.896039		8.20078	83	350.4	337.82	0.902214		8.19777	83	313.175	299.5	0.940263		8.19777	83	532.4	519.442	0.91948		8.20078	83	354.054	342.236	0.923387		8.20278	83	222.941	210.311	0.913958		8.19492	83	282.972	271.169	0.896913		8.20078	83
8.29862	84	393.012	378.802	0.913777		8.30236	84	266.572	256.558	0.848971		8.29962	84	356.44	343.86	0.918345		8.29962	84	304.962	291.287	0.914478		8.29762	84	531.791	518.833	0.918402		8.29962	84	350.849	339.031	0.91474		8.30062	84	221.062	208.432	0.905792		8.29488	84	296.825	285.022	0.942733		8.29962	84
8.39847	85	403.69	389.48	0.939536		8.4031	85	269.395	259.381	0.858312		8.40147	85	353.991	341.411	0.911804		8.39847	85	315.157	301.482	0.946485		8.39947	85	553.333	540.375	0.956534		8.39947	85	346.536	334.718	0.903103		8.40147	85	220.838	208.208	0.904819		8.39684	85	299.366	287.563	0.951137		8.40047	85
8.49931	86	388.446	374.236	0.902763		8.50284	86	267.23	257.216	0.851148		8.50131	86	354.435	341.855	0.91299		8.49831	86	302.827	289.152	0.907776		8.49831	86	536.573	523.615	0.926867		8.49931	86	349.939	338.121	0.912284		8.50131	86	226.382	213.752	0.928911		8.49479	86	297.711	285.908	0.945663		8.49931	86
8.60016	87	379.195	364.985	0.880447		8.60257	87	274.938	264.924	0.876655		8.59916	87	349.848	337.268	0.90074		8.60016	87	306.155	292.48	0.918224		8.59816	87	531.468	518.51	0.91783		8.59916	87	352.106	340.288	0.918131		8.60116	87	218.428	205.798	0.894345		8.59475	87	290.38	278.577	0.921416		8.60116	87
8.69901	88	393.611	379.401	0.915222		8.70331	88	261.763	251.749	0.833058		8.70101	88	341.41	328.83	0.878204		8.69801	88	300.389	286.714	0.900122		8.69801	88	537.103	524.145	0.927805		8.69901	88	351.736	339.918	0.917133		8.70101	88	220.102	207.472	0.90162		8.6947	88	291.118	279.315	0.923857		8.69901	88
8.79885	89	393.353	379.143	0.9146		8.80304	89	270.49	260.476	0.861936		8.79985	89	353.527	340.947	0.910565		8.79885	89	312.342	298.667	0.937648		8.79785	89	533.127	520.169	0.920767		8.79985	89	357.925	346.107	0.933832		8.80085	89	218.574	205.944	0.89498		8.79566	89	285.527	273.724	0.905364		8.79985	89
8.8987	90	404.941	390.731	0.942553		8.90278	90	268.961	258.947	0.856876		8.8997	90	353.239	340.659	0.909796		8.8987	90	307.801	294.126	0.923391		8.8987	90	540.764	527.806	0.934285		8.8997	90	355.184	343.366	0.926436		8.9017	90	210.072	197.442	0.858032		8.89562	90	283.809	272.006	0.899681		8.9007	90
8.99955	91	398.121	383.911	0.926102		9.00252	91	278.601	268.587	0.888776		8.99955	91	359.379	346.799	0.926194		8.99854	91	307.216	293.541	0.921555		8.99854	91	529.731	516.773	0.914755		8.99955	91	340.653	328.835	0.88723		9.00155	91	230.654	218.024	0.947476		8.99557	91	295.959	284.156	0.939869		8.99955	91
9.09939	92	394.646	380.436	0.917719		9.10325	92	278.816	268.802	0.889487		9.09939	92	351.443	338.863	0.904999		9.09839	92	298.71	285.035	0.894851		9.10039	92	525.117	512.159	0.906588		9.09939	92	364.288	352.47	0.951		9.10139	92	225.443	212.813	0.924831		9.09553	92	282.343	270.54	0.894833		9.09939	92
9.19924	93	400.535	386.325	0.931925		9.20299	93	271.305	261.291	0.864633		9.20024	93	357.109	344.529	0.920132		9.19824	93	296.778	283.103	0.888785		9.19824	93	538.211	525.253	0.929766		9.19924	93	347.673	335.855	0.906171		9.20324	93	219.891	207.261	0.900703		9.19549	93	284.136	272.333	0.900763		9.19924	93
9.29908	94	409.098	394.888	0.952581		9.30272	94	283.931	273.917	0.906413		9.30008	94	359.21	346.63	0.925743		9.29908	94	318.051	304.376	0.955571		9.29808	94	541.892	528.934	0.936282		9.30008	94	348.082	336.264	0.907274		9.30109	94	226.133	213.503	0.927829		9.29544	94	283.515	271.712	0.898709		9.30008	94
9.39893	95	409.724	395.514	0.954091		9.40346	95	271.245	261.231	0.864434		9.39993	95	356.668	344.088	0.918954		9.39893	95	316.825	303.15	0.951722		9.39893	95	552.195	539.237	0.95452		9.39993	95	353.124	341.306	0.920878		9.40193	95	235.266	222.636	0.967519		9.3954	95	282.779	270.976	0.896275		9.39993	95
9.49978	96	402.628	388.418	0.936974		9.5032	96	278.74	268.726	0.889236		9.49978	96	347.764	335.184	0.895174		9.49878	96	307.398	293.723	0.922126		9.49878	96	540.645	527.687	0.934075		9.49978	96	346.36	334.542	0.902628		9.50178	96	223.545	210.915	0.916583		9.49536	96	288.757	276.954	0.916047		9.49978	96
9.59962	97	402.476	388.266	0.936607		9.60293	97	274.166	264.152	0.8741		9.59962	97	356.081	343.501	0.917386		9.59862	97	315.945	302.27	0.948959		9.59862	97	547.531	534.573	0.946264		9.59962	97	356.389	344.571	0.929687		9.60163	97	231.552	218.922	0.951379		9.59531	97	285.392	273.589	0.904917		9.59962	97
9.69947	98	412.368	398.158	0.960469		9.70367	98	275.916	265.902	0.879891		9.69947	98	360.447	347.867	0.929046		9.69847	98	309.491	295.816	0.928697		9.69847	98	540.799	527.841	0.934347		9.69947	98	342.675	330.857	0.892685		9.70147	98	222.873	210.243	0.913662		9.69527	98	277.528	265.725	0.878907		9.69947	98
9.79932	99	407.688	393.478	0.94918		9.80341	99	277.987	267.973	0.886744		9.80032	99	344.058	331.478	0.885276		9.79932	99	310.793	297.118	0.932785		9.79832	99	529.572	516.614	0.914474		9.80032	99	337.9	326.082	0.879802		9.80132	99	227.087	214.457	0.931975		9.79523	99	276.27	264.467	0.874746		9.79932	99
9.89916	100	405.697	391.487	0.944377		9.90314	100	270.624	260.61	0.862379		9.90016	100	352.841	340.261	0.908733		9.89916	100	303.748	290.073	0.910667		9.89916	100	535.94	522.982	0.925746		9.90016	100	346.013	334.195	0.901692		9.90216	100	229.142	216.512	0.940906		9.89518	100	287.512	275.709	0.911929		9.90016	100
9.99801	101	401.621	387.411	0.934545		10.0039	101	278.917	268.903	0.889822		10	101	356.835	344.255	0.9194		9.99901	101	298.501	284.826	0.894195		9.99901	101	532.93	519.972	0.920418		10	101	351.466	339.648	0.916404		10.002	101	223.476	210.846	0.916283		9.99614	101	284.187	272.384	0.900932		10	101
10.0999	102	398.329	384.119	0.926603		10.1036	102	276.512	266.498	0.881863		10.0999	102	368.328	355.748	0.950094		10.0989	102	308.388	294.713	0.925234		10.0989	102	526.818	513.86	0.909599		10.0999	102	349.102	337.284	0.910026		10.1019	102	232.255	219.625	0.954434		10.0961	102	290.191	278.388	0.92079		10.0999	102
10.1977	103	389.975	375.765	0.906451		10.2034	103	276.365	266.351	0.881377		10.1997	103	358.531	345.951	0.923929		10.1987	103	306.746	293.071	0.920079		10.1987	103	530.185	517.227	0.915559		10.1997	103	341.133	329.315	0.888525		10.2017	103	227.538	214.908	0.933935		10.1961	103	290.009	278.206	0.920188		10.1997	103
10.2995	104	397.761	383.551	0.925233		10.3031	104	264.877	254.863	0.843362		10.3005	104	352.214	339.634	0.907059		10.2995	104	310.46	296.785	0.931739		10.2985	104	544.632	531.674	0.941132		10.3005	104	355.647	343.829	0.927685		10.3015	104	230.413	217.783	0.946429		10.296	104	283.769	271.966	0.899549		10.2995	104
10.3994	105	396.272	382.062	0.921641		10.4038	105	272.528	262.514	0.86868		10.4004	105	365.747	353.167	0.943201		10.3994	105	303.842	290.167	0.910962		10.3994	105	530.989	518.031	0.916982		10.4004	105	340.948	329.13	0.888026		10.4024	105	235.223	222.593	0.967332		10.396	105	286.108	274.305	0.907286		10.4004	105
10.4982	106	409.076	394.866	0.952528		10.5036	106	271.468	261.454	0.865172		10.5002	106	361.721	349.141	0.932449		10.4992	106	311.912	298.237	0.936298		10.4992	106	539.924	526.966	0.932798		10.5002	106	354.852	343.034	0.92554		10.5022	106	225.738	213.108	0.926113		10.4959	106	286.794	274.991	0.909555		10.5002	106
10.6001	107	396.763	382.553	0.922826		10.6033	107	276.737	266.723	0.882608		10.6001	107	358.507	345.927	0.923865		10.5991	107	309.14	295.465	0.927595		10.5991	107	539.439	526.481	0.93194		10.6001	107	354.712	342.894	0.925163		10.6021	107	220.385	207.755	0.90285		10.5939	107	284.846	273.043	0.903111		10.6001	107
10.6999	108	397.659	383.449	0.924987		10.702	108	282.893	272.879	0.902978		10.6999	108	364.022	351.442	0.938594		10.6989	108	310.081	296.406	0.930549		10.6989	108	537.644	524.686	0.928763		10.6999	108	341.811	329.993	0.890354		10.7019	108	224.148	211.518	0.919203		10.6958	108	287.587	275.784	0.912177		10.6999	108
10.7998	109	407.729	393.519	0.949279		10.8018	109	278.253	268.239	0.887624		10.8008	109	364.511	351.931	0.9399		10.7988	109	312.859	299.184	0.939271		10.7988	109	525.394	512.436	0.907078		10.7998	109	343.104	331.286	0.893843		10.8018	109	221.95	209.32	0.909651		10.7958	109	281.155	269.352	0.890903		10.7988	109
10.8996	110	404.69	390.48	0.941948		10.9035	110	283.374	273.36	0.90457		10.9006	110	360.322	347.742	0.928712		10.8996	110	308.826	295.151	0.926609		10.8996	110	534.153	521.195	0.922583		10.8986	110	353.041	341.223	0.920654		10.9006	110	224.62	211.99	0.921254		10.8958	110	285.1	273.297	0.903952		10.9006	110
10.9985	111	388.427	374.217	0.902717		11.0022	111	269.876	259.862	0.859904		11.0005	111	369.735	357.155	0.953852		10.9975	111	301.984	288.309	0.905129		10.9975	111	536.384	523.426	0.926532		11.0005	111	355.267	343.449	0.92666		11.0025	111	237.791	225.161	0.978492		10.9957	111	296.288	284.485	0.940957		11.0005	111
11.1003	112	396.921	382.711	0.923207		11.104	112	278.668	268.654	0.888998		11.1003	112	348.704	336.124	0.897684		11.0993	112	302.043	288.368	0.905314		11.0993	112	541.255	528.297	0.935154		11.1003	112	351.433	339.615	0.916315		11.1023	112	233.609	220.979	0.960318		11.0947	112	296.295	284.492	0.94098		11.1003	112
11.1982	113	403.724	389.514	0.939618		11.2037	113	268.788	258.774	0.856304		11.2002	113	344.321	331.741	0.885979		11.1982	113	306.146	292.471	0.918196		11.1992	113	526.846	513.888	0.909649		11.2002	113	339.687	327.869	0.884624		11.2022	113	232.141	219.511	0.953939		11.1966	113	299.187	287.384	0.950545		11.2002	113
11.3	114	398.846	384.636	0.927851		11.3024	114	270.075	260.061	0.860563		11.301	114	359.14	346.56	0.925556		11.299	114	310.254	296.579	0.931092		11.299	114	549.187	536.229	0.949195		11.3	114	342.832	331.014	0.893109		11.302	114	220.737	208.107	0.90438		11.2966	114	290.02	278.217	0.920225		11.299	114
11.3989	115	415.724	401.514	0.968565		11.4022	115	278.887	268.873	0.889722		11.3989	115	365.815	353.235	0.943383		11.3979	115	294.746	281.071	0.882406		11.3999	115	532.009	519.051	0.918788		11.3989	115	344.249	332.431	0.896932		11.4009	115	223.308	210.678	0.915553		11.3965	115	299.186	287.383	0.950542		11.4009	115
11.4987	116	404.365	390.155	0.941164		11.5029	116	286.882	276.868	0.916178		11.5007	116	358.64	346.06	0.92422		11.4997	116	301.718	288.043	0.904294		11.4977	116	546.985	534.027	0.945297		11.5007	116	355.484	343.666	0.927245		11.5027	116	224.612	211.982	0.921219		11.4965	116	287.54	275.737	0.912022		11.4987	116
11.6006	117	391.599	377.389	0.910369		11.6037	117	270.742	260.728	0.86277		11.5996	117	343.496	330.916	0.883775		11.5996	117	308.446	294.771	0.925416		11.5996	117	536.456	523.498	0.92666		11.5986	117	358.481	346.663	0.935332		11.6006	117	225.416	212.786	0.924713		11.5944	117	292.888	281.085	0.929711		11.6006	117
11.6984	118	402.378	388.168	0.936371		11.7024	118	275.338	265.324	0.877978		11.7004	118	361.888	349.308	0.932895		11.6984	118	309.068	295.393	0.927369		11.6994	118	539.172	526.214	0.931467		11.7004	118	353.391	341.573	0.921598		11.7024	118	219.806	207.176	0.900334		11.6944	118	291.62	279.817	0.925517		11.6994	118
11.7982	119	391.76	377.55	0.910757		11.8021	119	280.389	270.375	0.894693		11.8012	119	367.163	354.583	0.946983		11.7992	119	307.248	293.573	0.921655		11.7982	119	544.381	531.423	0.940688		11.7992	119	360.905	349.087	0.941872		11.8012	119	226.562	213.932	0.929694		11.7944	119	298.117	286.314	0.947006		11.7992	119
11.8991	120	394.82	380.61	0.918139		11.9029	120	285.207	275.193	0.910636		11.8991	120	343.654	331.074	0.884197		11.8981	120	313.842	300.167	0.942357		11.9001	120	550.496	537.538	0.951512		11.8991	120	356.463	344.645	0.929887		11.9011	120	232.571	219.941	0.955807		11.8963	120	290.097	278.294	0.92048		11.9011	120
11.9989	121	389.892	375.682	0.906251		12.0026	121	274.208	264.194	0.874239		12.0009	121	342.715	330.135	0.88169		11.9979	121	311.992	298.317	0.936549		11.9979	121	542.365	529.407	0.937119		11.9989	121	349.757	337.939	0.911793		12.0009	121	232.764	220.134	0.956646		11.9953	121	301.585	289.782	0.958477		11.9989	121
12.0988	122	401.652	387.442	0.934619		12.1023	122	275.885	265.871	0.879788		12.0998	122	353	340.42	0.909158		12.0998	122	309.95	296.275	0.930138		12.0998	122	547.095	534.137	0.945492		12.0988	122	354.751	342.933	0.925268		12.1008	122	216.105	203.475	0.88425		12.0952	122	284.194	272.391	0.900955		12.1008	122
12.1986	123	405.038	390.828	0.942787		12.2041	123	277.847	267.833	0.886281		12.2006	123	359.098	346.518	0.925444		12.1986	123	308.077	294.402	0.924258		12.1976	123	560.214	547.256	0.968714		12.2006	123	353.765	341.947	0.922607		12.2026	123	229.797	217.167	0.943752		12.1952	123	281.391	269.588	0.891684		12.1996	123
12.2985	124	395.628	381.418	0.920088		12.3028	124	277.309	267.295	0.884501		12.2995	124	350.182	337.602	0.901632		12.2995	124	305.14	291.465	0.915037		12.2985	124	557.046	544.088	0.963107		12.2995	124	346.979	335.161	0.904298		12.3015	124	228.859	216.229	0.939676		12.2951	124	294.15	282.347	0.933885		12.2995	124
12.3993	125	394.854	380.644	0.918221		12.4025	125	281.154	271.14	0.897224		12.3993	125	357.71	345.13	0.921737		12.3983	125	303.61	289.935	0.910234		12.3983	125	552.078	539.12	0.954313		12.3993	125	361.186	349.368	0.94263		12.4013	125	230.174	217.544	0.945391		12.3951	125	287.045	275.242	0.910385		12.3993	125
12.4992	126	400.65	386.44	0.932202		12.5033	126	283.235	273.221	0.90411		12.5012	126	355.126	342.546	0.914836		12.4982	126	300.078	286.403	0.899145		12.4982	126	549.557	536.599	0.94985		12.5012	126	344.422	332.604	0.897399		12.5012	126	226.097	213.467	0.927673		12.4951	126	286.061	274.258	0.90713		12.4992	126
12.599	127	405.297	391.087	0.943412		12.604	127	276.407	266.393	0.881516		12.6	127	354.291	341.711	0.912606		12.6	127	305.517	291.842	0.916221		12.598	127	543.972	531.014	0.939964		12.599	127	351.128	339.31	0.915493		12.601	127	226.405	213.775	0.929011		12.595	127	284.834	273.031	0.903072		12.601	127
12.6989	128	401.537	387.327	0.934342		12.7028	128	285.293	275.279	0.91092		12.7009	128	358.052	345.472	0.92265		12.6989	128	306.922	293.247	0.920632		12.6979	128	528.145	515.187	0.911948		12.6999	128	357.608	345.79	0.932976		12.7009	128	224.659	212.029	0.921424		12.695	128	291.297	279.494	0.924449		12.6999	128
12.7987	129	394.099	379.889	0.916399		12.8025	129	284.027	274.013	0.906731		12.7997	129	359.057	346.477	0.925334		12.7987	129	301.728	288.053	0.904326		12.7987	129	543.109	530.151	0.938436		12.7997	129	357.113	345.295	0.931641		12.8017	129	223.693	211.063	0.917226		12.7949	129	283.716	271.913	0.899374		12.7997	129
12.8996	130	386.803	372.593	0.898799		12.9032	130	286.498	276.484	0.914908		12.8996	130	348.608	336.028	0.897428		12.8986	130	301.492	287.817	0.903585		12.8986	130	559.349	546.391	0.967183		12.8996	130	350.12	338.302	0.912773		12.9016	130	224.427	211.797	0.920416		12.8949	130	298.083	286.28	0.946894		12.8996	130
12.9994	131	389.161	374.951	0.904488		13.003	131	277.153	267.139	0.883984		12.9994	131	367.142	354.562	0.946927		12.9984	131	298.495	284.82	0.894176		12.9984	131	561.534	548.576	0.971051		12.9994	131	360.888	349.07	0.941826		13.0014	131	225.984	213.354	0.927182		12.9958	131	286.319	274.516	0.907983		12.9994	131
13.0992	132	386.859	372.649	0.898935		13.1027	132	275.111	265.097	0.877227		13.1002	132	351.342	338.762	0.90473		13.0982	132	306.698	293.023	0.919929		13.0982	132	544.015	531.057	0.94004		13.0992	132	356.158	344.34	0.929064		13.1012	132	226.247	213.617	0.928325		13.0958	132	281.953	270.15	0.893543		13.0992	132
13.1991	133	403.611	389.401	0.939345		13.2034	133	281.547	271.533	0.898524		13.2011	133	363.903	351.323	0.938276		13.1991	133	305.659	291.984	0.916667		13.1981	133	546.39	533.432	0.944244		13.2001	133	356.715	344.897	0.930567		13.2011	133	210.29	197.66	0.85898		13.1958	133	298.037	286.234	0.946742		13.2001	133
13.2989	134	402.659	388.449	0.937049		13.3032	134	280.596	270.582	0.895377		13.2999	134	349.048	336.468	0.898603		13.2999	134	302.312	288.637	0.906159		13.2989	134	544.419	531.461	0.940755		13.2999	134	350.581	338.763	0.914017		13.3019	134	230.352	217.722	0.946164		13.2957	134	295.417	283.614	0.938076		13.2999	134
13.3998	135	418.192	403.982	0.974519		13.4029	135	269.672	259.658	0.859229		13.3998	135	353.339	340.759	0.910063		13.3988	135	304.288	290.613	0.912362		13.3988	135	538.143	525.185	0.929646		13.3998	135	358.195	346.377	0.93456		13.4018	135	236.358	223.728	0.972265		13.3957	135	299.596	287.793	0.951898		13.4018	135
13.4996	136	404.11	389.9	0.940549		13.5036	136	270.956	260.942	0.863478		13.4996	136	355.248	342.668	0.915161		13.4986	136	296.592	282.917	0.888201		13.4986	136	559.909	546.951	0.968174		13.4996	136	359.389	347.571	0.937782		13.5016	136	224.219	211.589	0.919512		13.4956	136	291.014	279.211	0.923513		13.4996	136
13.5995	137	402.072	387.862	0.935633		13.6034	137	268.864	258.85	0.856555		13.5995	137	357.039	344.459	0.919945		13.5985	137	291.045	277.37	0.870787		13.5985	137	556.233	543.275	0.961667		13.5995	137	351.963	340.145	0.917745		13.6015	137	227.425	214.795	0.933444		13.5956	137	283.825	272.022	0.899734		13.5995	137
13.6993	138	403.591	389.381	0.939297		13.7031	138	273.051	263.037	0.87041		13.7003	138	343.049	330.469	0.882582		13.6993	138	301.405	287.73	0.903311		13.6983	138	563.001	550.043	0.973648		13.7003	138	354.469	342.651	0.924507		13.7013	138	228.717	216.087	0.939059		13.6955	138	285.426	273.623	0.90503		13.7003	138
13.7992	139	403.459	389.249	0.938978		13.8019	139	281.075	271.061	0.896963		13.8002	139	364.428	351.848	0.939678		13.7992	139	304.426	290.751	0.912796		13.7992	139	542.786	529.828	0.937865		13.8002	139	357.445	345.627	0.932536		13.8022	139	231.79	219.16	0.952413		13.7955	139	298.849	287.046	0.949427		13.8002	139
13.9	140	395.742	381.532	0.920363		13.9036	140	276.773	266.759	0.882727		13.9	140	357.351	344.771	0.920778		13.899	140	307.312	293.637	0.921856		13.899	140	548.31	535.352	0.947643		13.898	140	352.046	340.228	0.917969		13.902	140	220.523	207.893	0.90345		13.8954	140	281.924	270.121	0.893447		13.9	140
13.9999	141	401.972	387.762	0.935391		14.0033	141	286.456	276.442	0.914769		13.9999	141	354.081	341.501	0.912045		13.9989	141	299.109	285.434	0.896103		13.9989	141	567.15	554.192	0.980992		13.9999	141	357.691	345.873	0.9332		14.0019	141	224.721	212.091	0.921693		13.9954	141	288.514	276.711	0.915244		13.9999	141
14.0997	142	405.144	390.934	0.943043		14.1031	142	284.71	274.696	0.908991		14.0997	142	357.013	344.433	0.919875		14.0987	142	305.655	291.98	0.916654		14.0987	142	552.854	539.896	0.955686		14.0997	142	364.709	352.891	0.952135		14.1017	142	228.355	215.725	0.937486		14.0954	142	293.751	281.948	0.932565		14.0997	142
14.1996	143	386.346	372.136	0.897697		14.2038	143	269.239	259.225	0.857796		14.2006	143	358.367	345.787	0.923491		14.1996	143	308.177	294.502	0.924572		14.1986	143	553.75	540.792	0.957272		14.2006	143	354.277	342.459	0.923989		14.2016	143	221.936	209.306	0.90959		14.1963	143	293.681	281.878	0.932334		14.1996	143
14.2994	144	396.278	382.068	0.921656		14.3015	144	266.956	256.942	0.850242		14.3004	144	356.073	343.493	0.917365		14.2994	144	305.232	291.557	0.915326		14.2994	144	542.246	529.288	0.936909		14.3004	144	350.462	338.644	0.913696		14.3024	144	230.12	217.49	0.945156		14.2963	144	284.486	272.683	0.901921		14.3004	144
14.3993	145	394.327	380.117	0.916949		14.4033	145	269.657	259.643	0.859179		14.4003	145	357.636	345.056	0.921539		14.3993	145	302.134	288.459	0.9056		14.3993	145	558.23	545.272	0.965202		14.4003	145	370.398	358.58	0.967485		14.4003	145	232.657	220.027	0.956181		14.3962	145	288.492	276.689	0.915171		14.4003	145
14.4981	146	392.336	378.126	0.912147		14.502	146	279.486	269.472	0.891704		14.5001	146	353.984	341.404	0.911786		14.4971	146	307.925	294.25	0.923781		14.4991	146	539.55	526.592	0.932136		14.5001	146	359.807	347.989	0.938909		14.5021	146	231.697	219.067	0.952009		14.4962	146	293.472	281.669	0.931643		14.5001	146
14.5999	147	403.035	388.825	0.937956		14.6037	147	277.423	267.409	0.884878		14.5999	147	360.169	347.589	0.928304		14.5989	147	286.846	273.171	0.857604		14.5989	147	548.365	535.407	0.94774		14.5999	147	354.287	342.469	0.924016		14.6019	147	234.182	221.552	0.962808		14.5941	147	290.947	279.144	0.923291		14.5999	147
14.6978	148	403.684	389.474	0.939521		14.7035	148	271.078	261.064	0.863882		14.7008	148	364.252	351.672	0.939208		14.6988	148	297.247	283.572	0.890258		14.6988	148	545.296	532.338	0.942308		14.7008	148	355.551	343.733	0.927426		14.7018	148	234.192	221.562	0.962852		14.6961	148	296.605	284.802	0.942005		14.6998	148
14.7996	149	410.452	396.242	0.955848		14.8022	149	275.47	265.456	0.878415		14.8006	149	367.048	354.468	0.946676		14.7996	149	295.222	281.547	0.8839		14.7996	149	545.518	532.56	0.942701		14.8006	149	353.965	342.147	0.923147		14.8026	149	228.137	215.507	0.936538		14.7941	149	302.323	290.52	0.960918		14.8006	149
14.8995	150	392.61	378.4	0.912808		14.904	150	267.196	257.182	0.851036		14.9005	150	356.438	343.858	0.91834		14.8995	150	289.87	276.195	0.867098		14.8995	150	543.953	530.995	0.93993		14.9005	150	347.609	335.791	0.905998		14.9025	150	217.165	204.535	0.888857		14.896	150	296.252	284.449	0.940838		14.9005	150
14.9983	151	401.042	386.832	0.933148		15.0027	151	270.551	260.537	0.862138		15.0003	151	369.581	357.001	0.95344		14.9973	151	281.714	268.039	0.841493		14.9993	151	554.249	541.291	0.958156		15.0003	151	350.35	338.532	0.913393		15.0023	151	224.336	211.706	0.92002		14.996	151	297.851	286.048	0.946126		15.0003	151
15.0982	152	408.777	394.567	0.951807		15.1044	152	270.126	260.112	0.860731		15.1002	152	361.319	348.739	0.931375		15.0992	152	296.038	282.363	0.886462		15.0992	152	537.67	524.712	0.928809		15.0992	152	353.313	341.495	0.921388		15.1012	152	219.065	206.435	0.897114		15.0949	152	303.174	291.371	0.963733		15.1002	152
15.198	153	398.205	383.995	0.926304		15.2022	153	279.48	269.466	0.891685		15.201	153	359.802	347.222	0.927324		15.198	153	296.83	283.155	0.888949		15.199	153	536.27	523.312	0.92633		15.2	153	352.049	340.231	0.917977		15.202	153	220.162	207.532	0.901881		15.1959	153	304.312	292.509	0.967497		15.2	153
15.2999	154	397.714	383.504	0.92512		15.3029	154	279.012	268.998	0.890136		15.3009	154	352.356	339.776	0.907438		15.2999	154	294.04	280.365	0.880189		15.2979	154	539.941	526.983	0.932829		15.3009	154	361.553	349.735	0.94362		15.3029	154	225.877	213.247	0.926717		15.2948	154	312.829	301.026	0.995667		15.3009	154
15.3987	155	403.24	389.03	0.93845		15.4026	155	282.996	272.982	0.903319		15.3987	155	368.832	356.252	0.95144		15.3977	155	299.023	285.348	0.895833		15.3997	155	530.609	517.651	0.91631		15.3987	155	361.228	349.41	0.942743		15.4007	155	225.477	212.847	0.924979		15.3968	155	300.938	289.135	0.956337		15.4007	155
15.4986	156	384.743	370.533	0.89383		15.5024	156	266.504	256.49	0.848746		15.5006	156	372.203	359.623	0.960443		15.4976	156	287.237	273.562	0.858832		15.4996	156	533.093	520.135	0.920707		15.5006	156	362.79	350.972	0.946958		15.5006	156	223.484	210.854	0.916317		15.4948	156	293.151	281.348	0.930581		15.4986	156
15.6004	157	398.818	384.608	0.927783		15.6041	157	259.038	249.024	0.82404		15.5994	157	365.778	353.198	0.943284		15.5994	157	294.733	281.058	0.882365		15.5994	157	542.165	529.207	0.936765		15.5994	157	360.045	348.227	0.939551		15.6014	157	214.058	201.428	0.875355		15.5947	157	308.983	297.18	0.982946		15.6004	157
15.6983	158	402.462	388.252	0.936573		15.7028	158	274.173	264.159	0.874123		15.7013	158	357.272	344.692	0.920567		15.6983	158	302.085	288.41	0.905446		15.6983	158	534.871	521.913	0.923854		15.7003	158	357.166	345.348	0.931784		15.7023	158	228.459	215.829	0.937938		15.6967	158	292.037	280.234	0.926896		15.6993	158
15.7991	159	416.363	402.153	0.970107		15.8026	159	271.916	261.902	0.866655		15.7991	159	353.181	340.601	0.909641		15.8001	159	303.382	289.707	0.909518		15.7981	159	533.423	520.465	0.921291		15.8011	159	362.235	350.417	0.94546		15.8011	159	218.07	205.44	0.89279		15.7946	159	304.049	292.246	0.966627		15.7991	159
15.8989	160	384.809	370.599	0.893989		15.9023	160	269.24	259.226	0.8578		15.8989	160	345.598	333.018	0.889389		15.8999	160	294.426	280.751	0.881401		15.8979	160	551.081	538.123	0.952548		15.8989	160	355.776	343.958	0.928033		15.9009	160	226.841	214.211	0.930906		15.8946	160	294.484	282.681	0.93499		15.9009	160
15.9988	161	398.81	384.6	0.927764		16.003	161	280.865	270.851	0.896268		15.9998	161	349.192	336.612	0.898988		15.9978	161	290.437	276.762	0.868878		15.9978	161	547.326	534.368	0.945901		15.9988	161	367.004	355.186	0.958328		16.0008	161	231.116	218.486	0.949484		15.9945	161	298.281	286.478	0.947549		16.0008	161
16.0986	162	412.335	398.125	0.96039		16.1048	162	278.408	268.394	0.888137		16.1006	162	352.982	340.402	0.90911		16.0986	162	293.018	279.343	0.876981		16.0996	162	528.652	515.694	0.912846		16.0996	162	362.803	350.985	0.946993		16.1006	162	227.509	214.879	0.933809		16.0955	162	298.117	286.314	0.947006		16.1006	162
16.1985	163	391.705	377.495	0.910624		16.2025	163	273.889	263.875	0.873183		16.2015	163	376.822	364.242	0.972779		16.1985	163	298.838	285.163	0.895253		16.1985	163	531.256	518.298	0.917455		16.1995	163	360.995	349.177	0.942115		16.2025	163	232.268	219.638	0.954491		16.1955	163	282.089	270.286	0.893992		16.1995	163
16.2993	164	411.929	397.719	0.95941		16.3033	164	272.19	262.176	0.867561		16.2993	164	361.273	348.693	0.931252		16.3003	164	295.309	281.634	0.884173		16.2983	164	541.263	528.305	0.935169		16.2993	164	362.421	350.603	0.945962		16.3013	164	244.908	232.278	1.00942		16.2954	164	299.52	287.717	0.951647		16.2993	164
16.3992	165	395.484	381.274	0.91974		16.403	165	278.254	268.24	0.887628		16.3992	165	360.665	348.085	0.929629		16.4002	165	296.321	282.646	0.887351		16.4002	165	518.006	505.048	0.894001		16.3992	165	365.395	353.577	0.953986		16.4012	165	227.426	214.796	0.933448		16.3964	165	292.549	280.746	0.92859		16.4012	165
16.499	166	409.343	395.133	0.953172		16.5027	166	278.578	268.564	0.8887		16.5	166	358.396	345.816	0.923569		16.498	166	301.282	287.607	0.902925		16.498	166	527.733	514.775	0.911219		16.499	166	363.786	351.968	0.949645		16.503	166	226.129	213.499	0.927812		16.4953	166	305.242	293.439	0.970573		16.499	166
16.5989	167	398.293	384.083	0.926517		16.6025	167	270.95	260.936	0.863458		16.5999	167	353.604	341.024	0.910771		16.5989	167	301.908	288.233	0.904891		16.5979	167	538.963	526.005	0.931097		16.5999	167	365.669	353.851	0.954726		16.6009	167	234.224	221.594	0.962991		16.5953	167	301.16	289.357	0.957071		16.6009	167
16.6987	168	411.558	397.348	0.958516		16.7032	168	268.055	258.041	0.853878		16.7017	168	355.903	343.323	0.916911		16.6987	168	289.908	276.233	0.867217		16.6987	168	549.035	536.077	0.948926		16.7007	168	352.457	340.639	0.919078		16.7017	168	231.254	218.624	0.950084		16.6952	168	295.746	283.943	0.939164		16.6997	168
16.7996	169	410.064	395.854	0.954912		16.8029	169	267.671	257.657	0.852608		16.7996	169	361.646	349.066	0.932248		16.8006	169	294.103	280.428	0.880387		16.7986	169	535.995	523.037	0.925844		16.7996	169	354.178	342.36	0.923722		16.8016	169	226.23	213.6	0.928251		16.7952	169	306.614	294.811	0.975111		16.7996	169
16.8994	170	419.382	405.172	0.977389		16.9027	170	272.893	262.879	0.869888		16.8994	170	360.475	347.895	0.929121		16.8984	170	287.055	273.38	0.85826		16.8984	170	536.606	523.648	0.926925		16.8994	170	352.323	340.505	0.918717		16.9014	170	226.738	214.108	0.930459		16.8951	170	292.929	281.126	0.929847		16.8994	170
16.9993	171	403.066	388.856	0.93803		17.0034	171	277.819	267.805	0.886188		17.0003	171	351.335	338.755	0.904711		16.9983	171	290.476	276.801	0.869001		16.9983	171	549.472	536.514	0.9497		16.9993	171	363.832	352.014	0.949769		17.0013	171	234.942	222.312	0.966111		16.9951	171	292.128	280.325	0.927197		16.9993	171
17.0991	172	400.477	386.267	0.931785		17.1031	172	275.328	265.314	0.877945		17.1001	172	352.981	340.401	0.909107		17.0991	172	290.4	276.725	0.868762		17.1001	172	535.009	522.051	0.924098		17.1001	172	357.834	346.016	0.933586		17.1011	172	232.577	219.947	0.955833		17.0951	172	296.763	284.96	0.942528		17.1001	172
17.1989	173	398.933	384.723	0.92806		17.2029	173	283.396	273.382	0.904643		17.2	173	365.129	352.549	0.941551		17.1989	173	297.788	284.113	0.891956		17.1989	173	539.291	526.333	0.931678		17.2	173	372.842	361.024	0.974079		17.202	173	229.528	216.898	0.942583		17.195	173	294.587	282.784	0.935331		17.2	173
17.2998	174	401.641	387.431	0.934593		17.3036	174	275.133	265.119	0.8773		17.2998	174	361.038	348.458	0.930625		17.2988	174	298.796	285.121	0.895121		17.2988	174	547.726	534.768	0.946609		17.2998	174	362.705	350.887	0.946728		17.3018	174	227.891	215.261	0.935469		17.296	174	292.352	280.549	0.927938		17.2998	174
17.3996	175	409.707	395.497	0.95405		17.4034	175	272.764	262.75	0.869461		17.3996	175	368.087	355.507	0.94945		17.3986	175	288.668	274.993	0.863324		17.3986	175	541.799	528.841	0.936117		17.3996	175	366.317	354.499	0.956474		17.4016	175	219.411	206.781	0.898617		17.3959	175	307.621	295.818	0.978442		17.3996	175
17.4995	176	402.058	387.848	0.935599		17.5031	176	277.788	267.774	0.886086		17.4995	176	358.511	345.931	0.923876		17.4985	176	295.775	282.1	0.885636		17.4985	176	543.253	530.295	0.938691		17.4995	176	361.851	350.033	0.944424		17.5015	176	226.136	213.506	0.927842		17.4959	176	295.148	283.345	0.937186		17.4995	176
17.5993	177	399.56	385.35	0.929573		17.6038	177	276.742	266.728	0.882624		17.6003	177	352.255	339.675	0.907168		17.5993	177	303.264	289.589	0.909148		17.5983	177	555.173	542.215	0.959791		17.6003	177	361.06	349.242	0.94229		17.6013	177	216.573	203.943	0.886284		17.5958	177	301.473	289.67	0.958107		17.6003	177
17.6992	178	403.621	389.411	0.939369		17.7036	178	285.223	275.209	0.910689		17.7002	178	351.702	339.122	0.905691		17.6992	178	296.392	282.717	0.887573		17.6992	178	539.307	526.349	0.931706		17.7002	178	358.836	347.018	0.936289		17.7022	178	220.606	207.976	0.90381		17.6958	178	291.228	279.425	0.92422		17.7002	178
17.8	179	411.923	397.713	0.959396		17.8023	179	262.584	252.57	0.835774		17.8	179	354.074	341.494	0.912026		17.799	179	292.129	278.454	0.87419		17.799	179	560.153	547.195	0.968606		17.8	179	364.499	352.681	0.951569		17.802	179	224.073	211.443	0.918877		17.7958	179	313.21	301.407	0.996928		17.8	179
17.8999	180	405.422	391.212	0.943714		17.903	180	287.593	277.579	0.918531		17.8999	180	344.951	332.371	0.887661		17.8989	180	294.738	281.063	0.882381		17.8989	180	535.855	522.897	0.925596		17.8999	180	352.688	340.87	0.919702		17.9019	180	221.334	208.704	0.906974		17.8957	180	309.423	297.62	0.984402		17.8999	180
17.9977	181	404.881	390.671	0.942409		18.0038	181	268.265	258.251	0.854573		17.9997	181	357.002	344.422	0.919846		17.9987	181	291.082	277.407	0.870903		17.9987	181	550.594	537.636	0.951686		17.9997	181	345.942	334.124	0.9015		18.0017	181	214.1	201.47	0.875537		17.9957	181	300.013	288.21	0.953277		17.9997	181
18.0996	182	395.888	381.678	0.920715		18.1035	182	266.629	256.615	0.84916		18.1006	182	373.141	360.561	0.962948		18.0996	182	293.125	279.45	0.877317		18.0986	182	554.382	541.424	0.958391		18.1006	182	366.289	354.471	0.956398		18.1016	182	222.877	210.247	0.91368		18.0946	182	294.869	283.066	0.936263		18.0996	182
18.1984	183	412.018	397.808	0.959625		18.2032	183	276.787	266.773	0.882773		18.2004	183	360.12	347.54	0.928173		18.1994	183	298.414	284.739	0.893921		18.1994	183	557.994	545.036	0.964785		18.2004	183	359.987	348.169	0.939395		18.2024	183	214.739	202.109	0.878314		18.1956	183	292.627	280.824	0.928848		18.2004	183
18.2993	184	396.668	382.458	0.922597		18.302	184	269.212	259.198	0.857707		18.3003	184	362.632	350.052	0.934882		18.2993	184	314.985	301.31	0.945945		18.2993	184	542.992	530.034	0.938229		18.3003	184	360.837	349.019	0.941688		18.3023	184	216.23	203.6	0.884793		18.2955	184	302.188	290.385	0.960471		18.3003	184
18.4001	185	408.177	393.967	0.95036		18.4037	185	269.507	259.493	0.858683		18.4001	185	348.411	335.831	0.896902		18.3991	185	294.855	281.18	0.882748		18.3991	185	548.026	535.068	0.94714		18.4001	185	353.972	342.154	0.923166		18.4021	185	226.344	213.714	0.928746		18.3955	185	291.028	279.225	0.923559		18.4001	185
18.498	186	414.419	400.209	0.965417		18.5035	186	273.984	263.97	0.873498		18.5	186	360.968	348.388	0.930438		18.499	186	304.058	290.383	0.91164		18.499	186	541.094	528.136	0.934869		18.5	186	358.099	346.281	0.934301		18.502	186	230.456	217.826	0.946616		18.4965	186	297.802	285.999	0.945964		18.5	186
18.5998	187	405.335	391.125	0.943504		18.6042	187	267.604	257.59	0.852386		18.6008	187	365.052	352.472	0.941345		18.5988	187	299.353	285.678	0.896869		18.5988	187	550.362	537.404	0.951275		18.5988	187	360.196	348.378	0.939959		18.6018	187	228.816	216.186	0.939489		18.5944	187	295.72	283.917	0.939078		18.5998	187
18.6986	188	419.134	404.924	0.976791		18.7039	188	271.032	261.018	0.863729		18.7006	188	345.88	333.3	0.890142		18.6996	188	302.328	288.653	0.906209		18.6996	188	546.397	533.439	0.944256		18.7006	188	352.159	340.341	0.918274		18.7026	188	233.114	220.484	0.958167		18.6964	188	296.041	284.238	0.94014		18.7006	188
18.7995	189	398.856	384.646	0.927875		18.8027	189	279.242	269.228	0.890897		18.8005	189	358.3	345.72	0.923312		18.7995	189	303.978	290.303	0.911389		18.7975	189	540.658	527.7	0.934098		18.8005	189	353.892	342.074	0.92295		18.8025	189	234.907	222.277	0.965959		18.7943	189	301.872	290.069	0.959426		18.7985	189
18.9003	190	394.827	380.617	0.918156		18.9024	190	265.719	255.705	0.846148		18.8993	190	368.706	356.126	0.951104		18.8993	190	297.188	283.513	0.890072		18.8993	190	538.254	525.296	0.929842		18.8983	190	365.956	354.138	0.9555		18.9003	190	228.111	215.481	0.936425		18.8963	190	301.376	289.573	0.957786		18.9003	190
18.9982	191	405.828	391.618	0.944693		19.0021	191	278.372	268.358	0.888018		19.0002	191	366.708	354.128	0.945768		18.9992	191	293.943	280.268	0.879885		18.9992	191	533.802	520.844	0.921962		19.0002	191	344.079	332.261	0.896474		19.0022	191	229.823	217.193	0.943865		18.9962	191	296.266	284.463	0.940884		19.0002	191
19.1	192	415	400.79	0.966819		19.1039	192	276.859	266.845	0.883011		19.101	192	359.428	346.848	0.926325		19.099	192	286.902	273.227	0.85778		19.099	192	541.069	528.111	0.934825		19.099	192	364.173	352.355	0.950689		19.101	192	225.295	212.665	0.924188		19.0942	192	292.03	280.227	0.926873		19.1	192
19.1999	193	399.985	385.775	0.930598		19.2036	193	268.196	258.182	0.854345		19.2009	193	366.099	353.519	0.944141		19.1979	193	297.117	283.442	0.88985		19.1999	193	540.982	528.024	0.934671		19.2009	193	352.231	340.413	0.918469		19.2029	193	227.596	214.966	0.934187		19.1962	193	306.999	295.196	0.976384		19.2009	193
19.2997	194	401.305	387.095	0.933782		19.3023	194	271.295	261.281	0.8646		19.3007	194	355.368	342.788	0.915482		19.2997	194	308.172	294.497	0.924556		19.2997	194	532.722	519.764	0.92005		19.3007	194	368.42	356.602	0.962148		19.3027	194	222.653	210.023	0.912706		19.2951	194	297.161	285.358	0.943844		19.3007	194
19.3986	195	400.023	385.813	0.93069		19.4021	195	278.966	268.952	0.889984		19.3996	195	347.847	335.267	0.895396		19.3996	195	299.905	286.23	0.898602		19.3996	195	526.825	513.867	0.909611		19.3986	195	369.002	357.184	0.963718		19.4006	195	223.916	211.286	0.918195		19.3961	195	299.56	287.757	0.951779		19.4006	195
19.4984	196	401.038	386.828	0.933138		19.5028	196	267.127	257.113	0.850807		19.5004	196	370.375	357.795	0.955561		19.4984	196	301.482	287.807	0.903553		19.4984	196	539.596	526.638	0.932218		19.5004	196	359.305	347.487	0.937555		19.5024	196	226.724	214.094	0.930398		19.495	196	296.864	285.061	0.942862		19.4994	196
19.6003	197	396.604	382.394	0.922442		19.6025	197	277.68	267.666	0.885728		19.5993	197	351.008	338.428	0.903838		19.5983	197	300.917	287.242	0.901779		19.5993	197	535.571	522.613	0.925093		19.5993	197	362.507	350.689	0.946194		19.6013	197	222.875	210.245	0.913671		19.595	197	300.365	288.562	0.954442		19.6003	197
19.6991	198	404.701	390.491	0.941974		19.7023	198	275.924	265.91	0.879917		19.7011	198	352.819	340.239	0.908674		19.6981	198	293.558	279.883	0.878676		19.6981	198	535.689	522.731	0.925302		19.6991	198	360.906	349.088	0.941875		19.7031	198	220.962	208.332	0.905358		19.6949	198	294.915	283.112	0.936415		19.7011	198
19.799	199	397.7	383.49	0.925086		19.803	199	283.608	273.594	0.905344		19.801	199	353.463	340.883	0.910394		19.8	199	303.678	290.003	0.910447		19.798	199	540.392	527.434	0.933627		19.799	199	361.463	349.645	0.943377		19.803	199	227.452	214.822	0.933561		19.7949	199	290.414	278.611	0.921528		19.799	199
19.8988	200	400.253	386.043	0.931245		19.9028	200	270.208	260.194	0.861003		19.8998	200	371.54	358.96	0.958672		19.8978	200	294.642	280.967	0.882079		19.8978	200	542.957	529.999	0.938167		19.8988	200	350.569	338.751	0.913984		19.9008	200	221.731	209.101	0.908699		19.8948	200	311.878	300.075	0.992522		19.9008	200
[truncated: 17 more columns]

## Sheet: MRC5 3hUV
Cell 00						Cell 01						Cell 02						Cell 03						Cell 04						Cell 05						Cell 06						Cell 07						Cell 08
	paste BG		average pre-bleach				paste BG		average pre-bleach				paste BG		average pre-bleach				paste BG		average pre-bleach				paste BG		average pre-bleach				paste BG		average pre-bleach				paste BG		average pre-bleach				paste BG		average pre-bleach				paste BG
	1	10.061	492.725				1	7.687	449.532				1	12.272	426.527				1	8.258	506.851				1	12.218	350.388				1	12.427	545.78				1	12.382	494.443				1	8.678	426.787				1
	paste FRAP	RAW					paste FRAP	RAW					paste FRAP	RAW					paste FRAP	RAW					paste FRAP	RAW					paste FRAP	RAW					paste FRAP	RAW					paste FRAP	RAW					paste FRAP
Time	data here		minus BG	Normalized		Time	data here		minus BG	Normalized		Time	data here		minus BG	Normalized		Time	data here		minus BG	Normalized		Time	data here		minus BG	Normalized		Time	data here		minus BG	Normalized		Time	data here		minus BG	Normalized		Time	data here		minus BG	Normalized		Time	data here
0	1	535.793	525.732	1.06699		0	1	487.269	479.582	1.06685		0	1	452.696	440.424	1.03258		0	1	554.796	546.538	1.0783		0	1	393.818	381.6	1.08908		0	1	606.43	594.003	1.08836		0	1	549.435	537.053	1.08618		0	1	462.45	453.772	1.06323		0	1
0.0798342	2	507.811	497.75	1.0102		0.0798342	2	475.237	467.55	1.04008		0.0779433	2	454.987	442.715	1.03795		0.0798342	2	538.385	530.127	1.04592		0.0798342	2	383.19	370.972	1.05875		0.0779433	2	583.408	570.981	1.04617		0.0779433	2	538.478	526.096	1.06402		0.0798342	2	462.564	453.886	1.06349		0.0779433	2
0.171676	3	519.178	509.117	1.03327		0.171676	3	483.938	476.251	1.05944		0.170896	3	456.549	444.277	1.04161		0.171676	3	545.584	537.326	1.06013		0.169674	3	366.238	354.02	1.01037		0.171896	3	563.782	551.355	1.01021		0.170896	3	516.499	504.117	1.01957		0.171676	3	455.816	447.138	1.04768		0.170896	3
0.271522	4	527.584	517.523	1.05033		0.271522	4	482.973	475.286	1.05729		0.271853	4	460.468	448.196	1.0508		0.271522	4	531.925	523.667	1.03318		0.269521	4	379.481	367.263	1.04816		0.271853	4	560.448	548.021	1.00411		0.271853	4	534.345	521.963	1.05566		0.272523	4	448.747	440.069	1.03112		0.270852	4
0.371368	5	505.495	495.434	1.0055		0.371368	5	479.38	471.693	1.0493		0.371809	5	467.026	454.754	1.06618		0.372369	5	535.849	527.591	1.04092		0.370368	5	377.573	365.355	1.04272		0.371809	5	573.259	560.832	1.02758		0.370809	5	522.422	510.04	1.03155		0.372369	5	452.644	443.966	1.04025		0.370809	5
0.470214	6	498.517	488.456	0.991336		0.471215	6	460.52	452.833	1.00734		0.471766	6	446.755	434.483	1.01865		0.473216	6	523.653	515.395	1.01686		0.470214	6	372.016	359.798	1.02686		0.471766	6	563.028	550.601	1.00883		0.470765	6	526.837	514.455	1.04047		0.472215	6	437.802	429.124	1.00547		0.471766	6
0.572061	7	511.133	501.072	1.01694		0.571061	7	452.573	444.886	0.989666		0.571723	7	449.995	437.723	1.02625		0.572061	7	508.766	500.508	0.987485		0.572061	7	365.115	352.897	1.00716		0.571723	7	572.21	559.783	1.02566		0.570722	7	498.426	486.044	0.983014		0.572061	7	425.549	416.871	0.976765		0.571723	7
0.669907	8	513.249	503.188	1.02123		0.671908	8	466.391	458.704	1.0204		0.671679	8	423.057	410.785	0.963091		0.671908	8	530.95	522.692	1.03125		0.669907	8	357.649	345.431	0.985853		0.671679	8	577.005	564.578	1.03444		0.670679	8	516.006	503.624	1.01857		0.671908	8	446.256	437.578	1.02528		0.671679	8
0.771754	9	510.35	500.289	1.01535		0.771754	9	464.665	456.978	1.01656		0.771636	9	444.743	432.471	1.01393		0.771754	9	527.078	518.82	1.02361		0.769753	9	378.363	366.145	1.04497		0.771636	9	567.626	555.199	1.01726		0.770635	9	537.485	525.103	1.06201		0.771754	9	433.851	425.173	0.996217		0.771636	9
0.8716	10	509.608	499.547	1.01385		0.869599	10	454.835	447.148	0.994698		0.871592	10	456.821	444.549	1.04225		0.872601	10	533.618	525.36	1.03652		0.8716	10	367.301	355.083	1.0134		0.872593	10	561.627	549.2	1.00627		0.870592	10	510.423	498.041	1.00728		0.872601	10	433.49	424.812	0.995371		0.871592	10
0.970446	11	512.868	502.807	1.02046		0.971447	11	456.419	448.732	0.998221		0.971549	11	442.474	430.202	1.00861		0.972447	11	522.528	514.27	1.01464		0.970446	11	367.816	355.598	1.01487		0.97255	11	569.412	556.985	1.02053		0.970548	11	504.979	492.597	0.996267		0.972447	11	448.078	439.4	1.02955		0.971549	11
1.07229	12	502.848	492.787	1.00013		1.07129	12	452.878	445.191	0.990344		1.07151	12	443.284	431.012	1.01051		1.07229	12	519.796	511.538	1.00925		1.07029	12	365.995	353.777	1.00967		1.07251	12	555.486	543.059	0.995014		1.07151	12	518.943	506.561	1.02451		1.07229	12	445.474	436.796	1.02345		1.07151	12
1.17014	13	502.279	492.218	0.998971		1.17214	13	446.221	438.534	0.975535		1.17046	13	428.834	416.562	0.976636		1.17214	13	521.87	513.612	1.01334		1.17014	13	376.694	364.476	1.04021		1.17046	13	557.401	544.974	0.998523		1.17146	13	498.577	486.195	0.983319		1.17214	13	436.802	428.124	1.00313		1.17146	13
1.27199	14	499.772	489.711	0.993883		1.27199	14	449.205	441.518	0.982173		1.27142	14	439.563	427.291	1.00179		1.27199	14	523.464	515.206	1.01648		1.26998	14	365.663	353.445	1.00872		1.27242	14	564.47	552.043	1.01147		1.27142	14	510.588	498.206	1.00761		1.27199	14	431.123	422.445	0.989825		1.27142	14
1.37083	15	494.176	484.115	0.982526		1.37183	15	455.009	447.322	0.995085		1.37238	15	433.632	421.36	0.987885		1.37283	15	513.941	505.683	0.997695		1.36983	15	357.396	345.178	0.985131		1.37238	15	559.214	546.787	1.00184		1.37138	15	522.289	509.907	1.03128		1.37083	15	427.567	418.889	0.981493		1.37138	15
1.47068	16	507.029	496.968	1.00861		1.47168	16	468.28	460.593	1.02461		1.47233	16	439.16	426.888	1.00085		1.47268	16	512.145	503.887	0.994152		1.47068	16	358.647	346.429	0.988701		1.47233	16	554.631	542.204	0.993447		1.47133	16	503.447	491.065	0.993169		1.47268	16	440.328	431.65	1.01139		1.47133	16
1.57052	17	505.081	495.02	1.00466		1.57153	17	463.645	455.958	1.0143		1.57229	17	437.235	424.963	0.996332		1.57253	17	500.585	492.327	0.971344		1.57052	17	357.757	345.539	0.986161		1.57229	17	554.925	542.498	0.993986		1.57129	17	510.536	498.154	1.00751		1.57253	17	429.133	420.455	0.985163		1.57129	17
1.67237	18	507.898	497.837	1.01037		1.67037	18	466.973	459.286	1.0217		1.67024	18	443.788	431.516	1.0117		1.67237	18	519.217	510.959	1.0081		1.67037	18	370.622	358.404	1.02288		1.67125	18	571.325	558.898	1.02403		1.67125	18	498.363	485.981	0.982887		1.67237	18	429.368	420.69	0.985713		-4371.5	18
1.77222	19	502.005	491.944	0.998415		1.77222	19	464.054	456.367	1.01521		1.7722	19	430.955	418.683	0.981608		1.77222	19	507.432	499.174	0.984853		1.77022	19	352.759	340.541	0.971897		1.7722	19	553.034	540.607	0.990521		1.7712	19	494.569	482.187	0.975213		1.77222	19	436.414	427.736	1.00222		1.7722	19
1.87106	20	493.904	483.843	0.981974		1.87006	20	449.502	441.815	0.982834		1.87216	20	449.07	436.798	1.02408		1.87307	20	510.113	501.855	0.990143		1.87006	20	352.711	340.493	0.97176		1.87216	20	542.175	529.748	0.970625		1.87116	20	505.955	493.573	0.998241		1.87307	20	430.367	421.689	0.988054		1.87216	20
2.03032	21	371.5	361.439	0.733551		2.02932	21	329.316	321.629	0.715476		2.02763	21	303.747	291.475	0.683367		2.03232	21	358.276	350.018	0.690574		2.02932	21	258.611	246.393	0.7032		2.02763	21	393.902	381.475	0.698953		2.02663	21	339.324	326.942	0.661233		2.03232	21	306.102	297.424	0.69689		2.02763	21
2.11015	22	398.642	388.581	0.788637		2.10915	22	347.983	340.296	0.757001		2.10557	22	345.528	333.256	0.781324		2.11215	22	395.486	387.228	0.763988		2.10915	22	284.982	272.764	0.778463		2.10557	22	430.069	417.642	0.76522		2.10457	22	379.628	367.246	0.742747		2.11215	22	337.208	328.53	0.769774		2.10557	22
2.19999	23	412.925	402.864	0.817624		2.19799	23	371.897	364.21	0.810199		2.19652	23	363.88	351.608	0.82435		2.20199	23	432.098	423.84	0.836222		2.19799	23	294.252	282.034	0.804919		2.19652	23	454.348	441.921	0.809705		2.19452	23	398.444	386.062	0.780802		2.20199	23	337.513	328.835	0.770489		2.19652	23
2.29984	24	426.121	416.06	0.844406		2.29784	24	381.184	373.497	0.830858		2.29648	24	375.537	363.265	0.85168		2.30184	24	426.345	418.087	0.824871		2.29784	24	290.315	278.097	0.793683		2.29648	24	472.557	460.13	0.843068		2.29548	24	413.884	401.502	0.81203		2.30184	24	344.647	335.969	0.787205		2.29648	24
2.39968	25	442.1	432.039	0.876836		2.39768	25	400.224	392.537	0.873213		2.39644	25	366.887	354.615	0.8314		2.40068	25	437.274	429.016	0.846434		2.39768	25	313.725	301.507	0.860495		2.39744	25	482.116	469.689	0.860583		2.39544	25	410.157	397.775	0.804492		2.40168	25	358.469	349.791	0.819591		2.39644	25
2.49953	26	445.275	435.214	0.88328		2.49853	26	401.723	394.036	0.876548		2.49639	26	390.058	377.786	0.885725		2.50153	26	454.791	446.533	0.880994		2.49853	26	294.906	282.688	0.806786		2.49739	26	492.786	480.359	0.880133		2.49439	26	414.108	401.726	0.812483		2.50153	26	374.254	365.576	0.856576		2.49439	26
2.60038	27	460.57	450.509	0.914321		2.59838	27	400.339	392.652	0.873469		2.59635	27	383.878	371.606	0.871236		2.60038	27	451.949	443.691	0.875387		2.59838	27	314.233	302.015	0.861944		2.59735	27	493.775	481.348	0.881945		2.59635	27	430.629	418.247	0.845896		2.60238	27	371.458	362.78	0.850025		2.59635	27
2.70022	28	450.074	440.013	0.893019		2.69822	28	408.498	400.811	0.891619		2.69631	28	395.94	383.668	0.899515		2.70222	28	469.145	460.887	0.909314		2.69822	28	317.455	305.237	0.87114		2.69731	28	500.707	488.28	0.894646		2.69631	28	437.583	425.201	0.85996		2.70222	28	385.527	376.849	0.88299		2.69431	28
2.80007	29	437.861	427.8	0.868233		2.79807	29	405.226	397.539	0.884341		2.79626	29	397.72	385.448	0.903689		2.80207	29	469.274	461.016	0.909569		2.79807	29	323.799	311.581	0.889246		2.79726	29	493.972	481.545	0.882306		2.79626	29	436.399	424.017	0.857566		2.80007	29	364.975	356.297	0.834835		2.79626	29
2.89992	30	463.727	453.666	0.920729		2.89791	30	412.395	404.708	0.900288		2.89722	30	392.43	380.158	0.891286		2.90092	30	492.936	484.678	0.956253		2.89791	30	322.344	310.126	0.885093		2.89722	30	505.189	492.762	0.902858		2.89422	30	449.075	436.693	0.883203		2.90192	30	395.788	387.11	0.907032		2.89622	30
2.99876	31	452.06	441.999	0.89705		2.99876	31	411.222	403.535	0.897679		2.99718	31	400.581	388.309	0.910396		3.00176	31	474.293	466.035	0.919471		2.99876	31	330.834	318.616	0.909323		2.99718	31	494.121	481.694	0.882579		2.99418	31	457.148	444.766	0.89953		3.00176	31	375.636	366.958	0.859815		2.99518	31
3.10061	32	468.8	458.739	0.931024		3.09661	32	429.646	421.959	0.938664		3.09513	32	393.56	381.288	0.893935		3.10261	32	470.699	462.441	0.91238		3.09861	32	319.228	307.01	0.8762		3.09613	32	518.752	506.325	0.927708		3.09613	32	444.964	432.582	0.874888		3.10061	32	380.703	372.025	0.871687		3.09613	32
3.20046	33	468.302	458.241	0.930014		3.19845	33	410.267	402.58	0.895554		3.19709	33	400.541	388.269	0.910302		3.20246	33	496.05	487.792	0.962397		3.19845	33	328.841	316.623	0.903635		3.19709	33	498.198	485.771	0.890049		3.19409	33	447.919	435.537	0.880865		3.20246	33	398.216	389.538	0.912721		3.19709	33
3.3003	34	459.204	449.143	0.911549		3.2983	34	404.037	396.35	0.881696		3.29505	34	392.26	379.988	0.890887		3.3003	34	475.441	467.183	0.921736		3.2983	34	332.027	319.809	0.912728		3.29605	34	508.674	496.247	0.909243		3.29605	34	451.659	439.277	0.888429		3.3023	34	397.327	388.649	0.910638		3.29705	34
3.39915	35	462.938	452.877	0.919127		3.39815	35	419.871	412.184	0.916919		3.397	35	398.879	386.607	0.906406		3.40115	35	486.507	478.249	0.943569		3.39815	35	326.431	314.213	0.896757		3.397	35	511.356	498.929	0.914157		3.395	35	444.654	432.272	0.874261		3.40215	35	399.844	391.166	0.916536		3.395	35
3.49899	36	455.109	445.048	0.903238		3.49899	36	408.95	401.263	0.892625		3.49496	36	409.42	397.148	0.931119		3.502	36	482.62	474.362	0.9359		3.49899	36	324.85	312.632	0.892245		3.49596	36	526.076	513.649	0.941128		3.49496	36	453.301	440.919	0.89175		3.50099	36	390.454	381.776	0.894534		3.49496	36
3.60084	37	477.652	467.591	0.94899		3.59684	37	411.252	403.565	0.897746		3.59492	37	399.008	386.736	0.906708		3.60084	37	480.957	472.699	0.932619		3.59884	37	313.763	301.545	0.860603		3.59592	37	521.493	509.066	0.932731		3.59492	37	451.608	439.226	0.888326		3.60084	37	401.949	393.271	0.921468		3.59492	37
3.69869	38	455.47	445.409	0.903971		3.69869	38	432.027	424.34	0.94396		3.69587	38	401.387	389.115	0.912286		3.70269	38	477.618	469.36	0.926031		3.69668	38	329.797	317.579	0.906364		3.69787	38	512.756	500.329	0.916722		3.69587	38	452.939	440.557	0.891017		3.70269	38	411.648	402.97	0.944194		3.69487	38
3.80053	39	457.762	447.701	0.908622		3.79753	39	421.71	414.023	0.92101		3.79583	39	401.007	388.735	0.911395		3.80253	39	496.683	488.425	0.963646		3.79853	39	336.212	323.994	0.924672		3.79583	39	507.737	495.31	0.907526		3.79683	39	438.461	426.079	0.861736		3.80053	39	407.093	398.415	0.933521		3.79683	39
3.90038	40	465.861	455.8	0.92506		3.89838	40	424.011	416.324	0.926128		3.89679	40	429.542	417.27	0.978296		3.90138	40	489.816	481.558	0.950098		3.89838	40	322.563	310.345	0.885718		3.89779	40	517.538	505.111	0.925484		3.89479	40	461.347	448.965	0.908022		3.90238	40	403.984	395.306	0.926236		3.89479	40
3.99923	41	464.177	454.116	0.921642		3.99923	41	424.325	416.638	0.926827		3.99574	41	409.612	397.34	0.931569		4.00123	41	482.782	474.524	0.93622		3.99923	41	325.471	313.253	0.894017		3.99774	41	526.994	514.567	0.94281		3.99474	41	468.509	456.127	0.922507		4.00123	41	410.852	402.174	0.942329		3.99574	41
4.09907	42	457.861	447.8	0.908823		4.09707	42	421.319	413.632	0.92014		4.0957	42	405.921	393.649	0.922916		4.10107	42	487.957	479.699	0.94643		4.09707	42	329.226	317.008	0.904734		4.0957	42	520.064	507.637	0.930112		4.0947	42	460.738	448.356	0.906791		4.10107	42	413.831	405.153	0.949309		4.0957	42
4.19892	43	477.53	467.469	0.948742		4.19892	43	434.284	426.597	0.948981		4.19766	43	418.812	406.54	0.953139		4.20292	43	483.404	475.146	0.937447		4.19692	43	338.574	326.356	0.931413		4.19766	43	514.72	502.293	0.920321		4.19466	43	472.096	459.714	0.929762		4.20092	43	411.352	402.674	0.9435		4.19566	43
4.30077	44	474.813	464.752	0.943228		4.29676	44	420.016	412.329	0.917241		4.29561	44	418.219	405.947	0.951749		4.30077	44	477.814	469.556	0.926418		4.29776	44	335.639	323.421	0.923037		4.29661	44	519.872	507.445	0.929761		4.29461	44	478.393	466.011	0.942498		4.30077	44	399.272	390.594	0.915196		4.29661	44
4.39961	45	470.434	460.373	0.934341		4.39761	45	441.216	433.529	0.964402		4.39757	45	411.953	399.681	0.937058		4.40061	45	493.98	485.722	0.958313		4.39761	45	329.753	317.535	0.906238		4.39657	45	537.092	524.665	0.961312		4.39457	45	468.704	456.322	0.922902		4.40261	45	396.323	387.645	0.908286		4.39557	45
4.49946	46	473.591	463.53	0.940748		4.49746	46	421.266	413.579	0.920022		4.49553	46	416.789	404.517	0.948396		4.50146	46	494.372	486.114	0.959086		4.49946	46	326.901	314.683	0.898099		4.49653	46	528.2	515.773	0.945019		4.49553	46	461.861	449.479	0.909062		4.50146	46	412.264	403.586	0.945637		4.49553	46
4.5993	47	472.556	462.495	0.938647		4.5973	47	410.559	402.872	0.896204		4.59548	47	410.751	398.479	0.93424		4.60131	47	489.427	481.169	0.94933		4.5993	47	341.189	328.971	0.938876		4.59648	47	522.208	509.781	0.934041		4.59548	47	459.962	447.58	0.905221		4.60131	47	414.984	406.306	0.95201		4.59548	47
4.69915	48	471.58	461.519	0.936666		4.69715	48	436.801	429.114	0.95458		4.69544	48	428.749	416.477	0.976436		4.70315	48	486.574	478.316	0.943701		4.69715	48	329.374	317.156	0.905157		4.69644	48	532.74	520.313	0.953338		4.69544	48	465.983	453.601	0.917399		4.70115	48	395.5	386.822	0.906358		4.69544	48
4.799	49	474.542	464.481	0.942678		4.797	49	423.599	415.912	0.925212		4.7964	49	416.012	403.74	0.946574		4.801	49	492.451	484.193	0.955296		4.798	49	333.814	321.596	0.917828		4.7964	49	528.832	516.405	0.946177		4.7954	49	473.731	461.349	0.933069		4.801	49	399.012	390.334	0.914587		4.7974	49
4.89884	50	481.715	471.654	0.957236		4.89884	50	435.351	427.664	0.951355		4.89735	50	422.015	409.743	0.960648		4.90084	50	489.328	481.07	0.949135		4.89784	50	332.992	320.774	0.915482		4.89835	50	537.102	524.675	0.96133		4.89535	50	458.851	446.469	0.902974		4.90184	50	411.46	402.782	0.943753		4.89535	50
4.99969	51	458.244	448.183	0.909601		4.99769	51	437.978	430.291	0.957199		4.99631	51	421.833	409.561	0.960222		5.00169	51	488.274	480.016	0.947055		4.99769	51	330.177	317.959	0.907448		4.99631	51	530.962	518.535	0.95008		4.99531	51	442.127	429.745	0.86915		5.00169	51	404.138	395.46	0.926597		4.99531	51
5.09954	52	468.621	458.56	0.930661		5.09753	52	421.816	414.129	0.921246		5.09627	52	423.72	411.448	0.964646		5.10154	52	503.545	495.287	0.977184		5.09753	52	322.394	310.176	0.885236		5.09627	52	522.424	509.997	0.934436		5.09527	52	453.709	441.327	0.892575		5.10154	52	395.703	387.025	0.906833		5.09627	52
5.19938	53	472.386	462.325	0.938302		5.19738	53	434.865	427.178	0.950274		5.19622	53	411.174	398.902	0.935232		5.20138	53	482.94	474.682	0.936531		5.19738	53	342.625	330.407	0.942975		5.19622	53	516.894	504.467	0.924304		5.19522	53	452.944	440.562	0.891028		5.20138	53	405.48	396.802	0.929742		5.19622	53
5.29923	54	471.74	461.679	0.936991		5.29723	54	434.356	426.669	0.949141		5.29618	54	413.052	400.78	0.939635		5.30123	54	487.628	479.37	0.945781		5.29823	54	336.96	324.742	0.926807		5.29618	54	505.569	493.142	0.903554		5.29518	54	482.023	469.641	0.949839		5.30123	54	409.912	401.234	0.940126		5.29618	54
5.39907	55	475.652	465.591	0.944931		5.39807	55	425.841	418.154	0.930199		5.39614	55	416.131	403.859	0.946853		5.40108	55	511.546	503.288	0.99297		5.39807	55	333.084	320.866	0.915745		5.39614	55	525.873	513.446	0.940756		5.39514	55	459.483	447.101	0.904253		5.40208	55	416.863	408.185	0.956413		5.39614	55
5.49992	56	463.651	453.59	0.920574		5.49792	56	428.566	420.879	0.936261		5.49609	56	434.082	421.81	0.98894		5.50192	56	477.842	469.584	0.926473		5.49792	56	324.169	311.951	0.890302		5.49709	56	522.854	510.427	0.935224		5.49509	56	466.083	453.701	0.917601		5.50192	56	407.949	399.271	0.935527		5.49609	56
5.59977	57	461.426	451.365	0.916059		5.59777	57	423.851	416.164	0.925773		5.59605	57	427.228	414.956	0.97287		5.60177	57	490.392	482.134	0.951234		5.59777	57	335.435	323.217	0.922455		5.59705	57	526.085	513.658	0.941144		5.59505	57	468.063	455.681	0.921605		5.60177	57	416.716	408.038	0.956069		5.59605	57
5.69961	58	468.531	458.47	0.930478		5.69761	58	438.37	430.683	0.958071		5.69601	58	414.862	402.59	0.943878		5.70162	58	478.583	470.325	0.927935		5.69761	58	343.066	330.848	0.944233		5.69701	58	536.064	523.637	0.959428		5.69601	58	463.895	451.513	0.913176		5.70162	58	416.602	407.924	0.955801		5.69601	58
5.79946	59	467.662	457.601	0.928715		5.79746	59	436.347	428.66	0.95357		5.79596	59	422.259	409.987	0.961221		5.80146	59	490.482	482.224	0.951412		5.79846	59	342.657	330.439	0.943066		5.79696	59	504.799	492.372	0.902143		5.79596	59	463.937	451.555	0.913261		5.80146	59	411.944	403.266	0.944887		5.79596	59
5.89931	60	471.299	461.238	0.936096		5.89831	60	416.184	408.497	0.908717		5.89492	60	437.737	425.465	0.997509		5.90131	60	488.314	480.056	0.947134		5.89831	60	341.667	329.449	0.940241		5.89692	60	525.057	512.63	0.939261		5.89592	60	477.791	465.409	0.94128		5.90131	60	404.27	395.592	0.926906		5.89592	60
6.00015	61	466.762	456.701	0.926888		5.99815	61	445.101	437.414	0.973044		5.99688	61	433.713	421.441	0.988075		6.00216	61	513.696	505.438	0.997212		6.00015	61	342.2	329.982	0.941762		5.99688	61	535.448	523.021	0.9583		5.99387	61	478.765	466.383	0.94325		6.00216	61	401.303	392.625	0.919955		5.99488	61
6.1	62	474.86	464.799	0.943323		6.098	62	431.03	423.343	0.941742		6.09683	62	424.363	412.091	0.966153		6.102	62	504.634	496.376	0.979333		6.098	62	343.994	331.776	0.946882		6.09683	62	521.923	509.496	0.933518		6.09583	62	485.769	473.387	0.957415		6.1	62	414.39	405.712	0.950619		6.09583	62
6.19985	63	464.499	454.438	0.922295		6.19785	63	439.07	431.383	0.959628		6.19679	63	417.602	405.33	0.950302		6.20185	63	503.28	495.022	0.976662		6.19785	63	339.065	326.847	0.932814		6.19679	63	532.331	519.904	0.952588		6.19579	63	471.222	458.84	0.927994		6.20185	63	393.625	384.947	0.901964		6.19579	63
6.29969	64	463.112	453.051	0.91948		6.29769	64	437.759	430.072	0.956711		6.29675	64	424.064	411.792	0.965452		6.30169	64	509.556	501.298	0.989044		6.29769	64	337.553	325.335	0.928499		6.29675	64	537.432	525.005	0.961935		6.29575	64	468.389	456.007	0.922265		6.30169	64	415.819	407.141	0.953967		6.29675	64
6.39954	65	474.969	464.908	0.943545		6.39854	65	442.878	435.191	0.968099		6.3967	65	419.573	407.301	0.954923		6.40054	65	483.642	475.384	0.937916		6.39854	65	336.349	324.131	0.925063		6.3967	65	530.606	518.179	0.949428		6.3957	65	462.641	450.259	0.91064		6.40154	65	393.857	385.179	0.902508		6.3967	65
6.49838	66	479.89	469.829	0.953532		6.49838	66	443.108	435.421	0.96861		6.49666	66	417.954	405.682	0.951127		6.50239	66	497.76	489.502	0.965771		6.49838	66	332.592	320.374	0.914341		6.49666	66	530.037	517.61	0.948385		6.49466	66	463.813	451.431	0.91301		6.50239	66	418.418	409.74	0.960056		6.49666	66
6.60023	67	487.803	477.742	0.969592		6.59823	67	440.479	432.792	0.962762		6.59461	67	432.002	419.73	0.984063		6.60223	67	495.428	487.17	0.96117		6.59823	67	329.923	317.705	0.906723		6.59562	67	531.747	519.32	0.951518		6.59562	67	475.807	463.425	0.937268		6.60223	67	409.228	400.55	0.938523		6.59662	67
6.70008	68	471.158	461.097	0.93581		6.69808	68	436.804	429.117	0.954587		6.69657	68	423	410.728	0.962958		6.70208	68	490.331	482.073	0.951114		6.69808	68	344.556	332.338	0.948486		6.69757	68	519.577	507.15	0.92922		6.69457	68	475.717	463.335	0.937086		6.70208	68	411.831	403.153	0.944623		6.69657	68
6.79992	69	463.123	453.062	0.919503		6.79792	69	440.307	432.62	0.96238		6.79553	69	428.578	416.306	0.976036		6.80193	69	486.368	478.11	0.943295		6.79792	69	336.526	324.308	0.925568		6.79753	69	509.118	496.691	0.910057		6.79553	69	480.215	467.833	0.946183		6.80093	69	416.368	407.69	0.955253		6.79653	69
6.89977	70	479.649	469.588	0.953043		6.89877	70	431.41	423.723	0.942588		6.89649	70	417.412	405.14	0.949857		6.90077	70	496.003	487.745	0.962304		6.89877	70	344.326	332.108	0.947829		6.89749	70	506.441	494.014	0.905152		6.89649	70	463.289	450.907	0.91195		6.90177	70	405.395	396.717	0.929542		6.89448	70
6.99862	71	475.133	465.072	0.943877		6.99862	71	425.255	417.568	0.928896		6.99644	71	427.522	415.25	0.97356		7.00262	71	499.128	490.87	0.96847		6.99862	71	341.028	328.81	0.938417		6.99744	71	530.249	517.822	0.948774		6.99444	71	465.975	453.593	0.917383		7.00262	71	413.389	404.711	0.948273		6.99544	71
7.10046	72	479.632	469.571	0.953008		7.09646	72	430.671	422.984	0.940944		7.0954	72	423.051	410.779	0.963077		7.10247	72	490.999	482.741	0.952432		7.09846	72	342.47	330.252	0.942532		7.0954	72	522.992	510.565	0.935477		7.0944	72	474.806	462.424	0.935243		7.10247	72	415.605	406.927	0.953465		7.0964	72
7.20031	73	467.423	457.362	0.92823		7.19831	73	441.705	434.018	0.965489		7.19736	73	434.814	422.542	0.990656		7.20231	73	490.956	482.698	0.952347		7.19831	73	351.061	338.843	0.967051		7.19736	73	526.448	514.021	0.941809		7.19435	73	473.784	461.402	0.933176		7.20231	73	399.627	390.949	0.916028		7.19536	73
7.30016	74	460.707	450.646	0.914599		7.29816	74	423.049	415.362	0.923988		7.29531	74	409.433	397.161	0.93115		7.30116	74	496.675	488.417	0.96363		7.29816	74	349.752	337.534	0.963315		7.29531	74	539.637	527.21	0.965975		7.29631	74	464.625	452.243	0.914652		7.30216	74	415.835	407.157	0.954004		7.29631	74
7.399	75	463.64	453.579	0.920552		7.399	75	429.411	421.724	0.938141		7.39527	75	425.518	413.246	0.968861		7.401	75	507.614	499.356	0.985212		7.399	75	337.334	325.116	0.927874		7.39727	75	523.898	511.471	0.937137		7.39627	75	467.169	454.787	0.919797		7.402	75	402.648	393.97	0.923106		7.39527	75
7.49885	76	477.087	467.026	0.947843		7.49885	76	446	438.313	0.975044		7.49522	76	428.526	416.254	0.975914		7.50285	76	483.757	475.499	0.938143		7.49885	76	338.543	326.325	0.931325		7.49623	76	516.483	504.056	0.923551		7.49422	76	478.885	466.503	0.943493		7.50085	76	404.817	396.139	0.928188		7.49522	76
7.6007	77	462.537	452.476	0.918313		7.59669	77	440.295	432.608	0.962353		7.59518	77	425.618	413.346	0.969096		7.6007	77	496.279	488.021	0.962849		7.5987	77	353.859	341.641	0.975036		7.59618	77	523.7	511.273	0.936774		7.59518	77	468.728	456.346	0.92295		7.6027	77	419.277	410.599	0.962069		7.59718	77
7.69854	78	468.831	458.77	0.931087		7.69854	78	427.849	420.162	0.934666		7.69714	78	433.183	420.911	0.986832		7.70254	78	500.239	491.981	0.970662		7.69754	78	333.85	321.632	0.917931		7.69614	78	540.228	527.801	0.967058		7.69514	78	450.748	438.366	0.886586		7.70054	78	413.898	405.22	0.949466		7.69514	78
7.80039	79	470.86	460.799	0.935205		7.79739	79	453.912	446.225	0.992644		7.79509	79	426.573	414.301	0.971335		7.80239	79	493.354	485.096	0.957078		7.79839	79	347.416	335.198	0.956648		7.7961	79	525.839	513.412	0.940694		7.79509	79	476.717	464.335	0.939108		7.80139	79	414.625	405.947	0.951169		7.7971	79
7.89923	80	464.834	454.773	0.922975		7.89923	80	437.184	429.497	0.955432		7.89705	80	418.756	406.484	0.953008		7.90124	80	487.342	479.084	0.945216		7.89923	80	341.083	328.865	0.938574		7.89805	80	544.362	531.935	0.974632		7.89505	80	468.49	456.108	0.922469		7.90124	80	407.152	398.474	0.933659		7.89505	80
7.99908	81	453.672	443.611	0.900322		7.99708	81	432.344	424.657	0.944666		7.99601	81	422.877	410.605	0.962669		8.00108	81	491.907	483.649	0.954223		7.99908	81	345.901	333.683	0.952324		7.99601	81	532.465	520.038	0.952834		7.99501	81	473.06	460.678	0.931712		8.00308	81	420.717	412.039	0.965443		7.99501	81
8.10093	82	470.829	460.768	0.935142		8.09693	82	428.972	421.285	0.937164		8.09597	82	421.424	409.152	0.959263		8.10093	82	486.117	477.859	0.9428		8.09693	82	362.981	350.763	1.00107		8.09597	82	535.973	523.546	0.959261		8.09496	82	479.536	467.154	0.944809		8.10093	82	419.754	411.076	0.963187		8.09496	82
8.19877	83	482.115	472.054	0.958048		8.19877	83	433.521	425.834	0.947284		8.19692	83	416.611	404.339	0.947979		8.20078	83	491.378	483.12	0.953179		8.19777	83	349.439	337.221	0.962422		8.19592	83	526.398	513.971	0.941718		8.19492	83	484.433	472.051	0.954713		8.20078	83	409.198	400.52	0.938453		8.19592	83
8.29962	84	475.169	465.108	0.94395		8.29762	84	432.392	424.705	0.944772		8.29588	84	414.1	401.828	0.942092		8.30062	84	484.156	475.898	0.938931		8.29862	84	356.269	344.051	0.981914		8.29588	84	533.955	521.528	0.955564		8.29488	84	484.722	472.34	0.955298		8.30162	84	415.524	406.846	0.953276		8.29588	84
8.39947	85	489.481	479.42	0.972997		8.39947	85	427.855	420.168	0.93468		8.39784	85	426.299	414.027	0.970692		8.40147	85	511.95	503.692	0.993767		8.39747	85	342.618	330.4	0.942955		8.39583	85	529.484	517.057	0.947372		8.39483	85	483.281	470.899	0.952384		8.40247	85	414.445	405.767	0.950747		8.39583	85
8.49931	86	466.848	456.787	0.927063		8.49731	86	431.087	423.4	0.941869		8.49579	86	426.125	413.853	0.970284		8.50131	86	484.547	476.289	0.939702		8.49931	86	330.943	318.725	0.909634		8.49679	86	509.502	497.075	0.91076		8.49479	86	471.677	459.295	0.928915		8.50131	86	405.098	396.42	0.928847		8.49579	86
8.59916	87	475.571	465.51	0.944766		8.59716	87	433.767	426.08	0.947831		8.59575	87	437.493	425.221	0.996937		8.60116	87	505.385	497.127	0.980815		8.59716	87	339.555	327.337	0.934213		8.59675	87	520.76	508.333	0.931388		8.59475	87	460.074	447.692	0.905448		8.60116	87	411.881	403.203	0.94474		8.59675	87
8.69901	88	470.375	460.314	0.934221		8.697	88	420.902	413.215	0.919212		8.6957	88	417.601	405.329	0.9503		8.70101	88	486.036	477.778	0.94264		8.69801	88	339.626	327.408	0.934416		8.69671	88	537.943	525.516	0.962871		8.6947	88	476.598	464.216	0.938867		8.70101	88	412.91	404.232	0.947151		8.6957	88
8.79885	89	482.958	472.897	0.959758		8.79785	89	427.325	419.638	0.933501		8.79566	89	425.968	413.696	0.969916		8.80085	89	499.118	490.86	0.96845		8.79785	89	354.275	342.057	0.976224		8.79666	89	529.826	517.399	0.947999		8.79566	89	480.526	468.144	0.946812		8.80185	89	417.061	408.383	0.956877		8.79566	89
8.8997	90	482.738	472.677	0.959312		8.8977	90	428.385	420.698	0.935859		8.89562	90	428.715	416.443	0.976357		8.9017	90	482.407	474.149	0.93548		8.8977	90	337.929	325.711	0.929572		8.89662	90	534.801	522.374	0.957114		8.89562	90	477.766	465.384	0.94123		8.9017	90	433.756	425.078	0.995995		8.89562	90
8.99955	91	473.23	463.169	0.940015		8.99754	91	441.745	434.058	0.965578		8.99557	91	429.297	417.025	0.977721		9.00155	91	487.94	479.682	0.946396		8.99754	91	333.265	321.047	0.916261		8.99658	91	535.838	523.411	0.959014		8.99557	91	469.721	457.339	0.924959		9.00155	91	415.916	407.238	0.954194		8.99557	91
9.09939	92	466.743	456.682	0.92685		9.09739	92	432.359	424.672	0.944699		9.09653	92	441.382	429.11	1.00605		9.10139	92	494.575	486.317	0.959487		9.09739	92	348.04	335.822	0.958429		9.09653	92	524.115	511.688	0.937535		9.09553	92	468.76	456.378	0.923015		9.10139	92	421.343	412.665	0.96691		9.09553	92
9.19924	93	474.382	464.321	0.942353		9.19724	93	457.795	450.108	1.00128		9.19649	93	416.567	404.295	0.947876		9.20124	93	494.656	486.398	0.959647		9.19824	93	343.311	331.093	0.944932		9.19649	93	542.577	530.15	0.971362		9.19549	93	475.604	463.222	0.936857		9.20124	93	428.025	419.347	0.982566		9.19549	93
9.29908	94	471.504	461.443	0.936512		9.29808	94	437.027	429.34	0.955083		9.29644	94	442.554	430.282	1.0088		9.30109	94	489.971	481.713	0.950403		9.29808	94	354.367	342.149	0.976486		9.29644	94	543.139	530.712	0.972391		9.29544	94	476.983	464.601	0.939646		9.30209	94	423.566	414.888	0.972119		9.29544	94
9.39993	95	478.672	468.611	0.95106		9.39893	95	435.836	428.149	0.952434		9.3964	95	406.189	393.917	0.923544		9.40193	95	476.265	468.007	0.923362		9.39793	95	350.727	338.509	0.966098		9.3964	95	538.554	526.127	0.96399		9.3954	95	477.789	465.407	0.941276		9.40193	95	421.272	412.594	0.966744		9.3964	95
9.49978	96	476.293	466.232	0.946232		9.49778	96	440.346	432.659	0.962466		9.49636	96	413.552	401.28	0.940807		9.50178	96	491.194	482.936	0.952816		9.49778	96	339.617	327.399	0.93439		9.49636	96	520.334	507.907	0.930607		9.49536	96	479.077	466.695	0.943881		9.50178	96	418.483	409.805	0.960209		9.49636	96
9.59962	97	480.652	470.591	0.955078		9.59762	97	419.502	411.815	0.916098		9.59631	97	406.9	394.628	0.925211		9.60163	97	494.506	486.248	0.959351		9.59762	97	346.802	334.584	0.954896		9.59631	97	531.009	518.582	0.950166		9.59531	97	456.214	443.832	0.897641		9.60163	97	412.413	403.735	0.945986		9.59631	97
9.69947	98	478.327	468.266	0.95036		9.69747	98	433.841	426.154	0.947996		9.69627	98	429.618	417.346	0.978474		9.70147	98	465.105	456.847	0.901344		9.69847	98	362.528	350.31	0.999777		9.69727	98	520.423	507.996	0.93077		9.69527	98	470.687	458.305	0.926912		9.70147	98	420.311	411.633	0.964492		9.69627	98
9.79932	99	485.491	475.43	0.964899		9.79832	99	429.151	421.464	0.937563		9.79623	99	433.464	421.192	0.987491		9.80132	99	488.991	480.733	0.94847		9.79832	99	338.542	326.324	0.931322		9.79723	99	511.549	499.122	0.914511		9.79523	99	477.513	465.131	0.940718		9.80132	99	414.384	405.706	0.950604		9.79623	99
9.90016	100	492.231	482.17	0.978578		9.89816	100	440.505	432.818	0.96282		9.89518	100	431.673	419.401	0.983292		9.90216	100	492.386	484.128	0.955168		9.89816	100	336.861	324.643	0.926524		9.89719	100	516.978	504.551	0.924458		9.89618	100	488.663	476.281	0.963269		9.90216	100	420.046	411.368	0.963871		9.89618	100
10	101	480.721	470.66	0.955218		9.99801	101	439.726	432.039	0.961087		9.99614	101	426.612	414.34	0.971426		10.002	101	493.265	485.007	0.956902		9.99801	101	350.891	338.673	0.966566		9.99714	101	537.171	524.744	0.961456		9.99614	101	480.128	467.746	0.946007		10.002	101	410.411	401.733	0.941295		9.99614	101
10.0999	102	470.144	460.083	0.933752		10.0979	102	429.596	421.909	0.938552		10.0961	102	431.657	419.385	0.983254		10.1019	102	485.108	476.85	0.940809		10.0979	102	349.695	337.477	0.963152		10.0971	102	522.728	510.301	0.934993		10.0961	102	494.778	482.396	0.975636		10.1019	102	429.941	421.263	0.987056		10.0961	102
10.1997	103	468.199	458.138	0.929805		10.1977	103	426.348	418.661	0.931327		10.1961	103	421.988	409.716	0.960585		10.2017	103	500.016	491.758	0.970222		10.1977	103	336.068	323.85	0.924261		10.1971	103	528.238	515.811	0.945089		10.1941	103	459.445	447.063	0.904176		10.2017	103	409.354	400.676	0.938819		10.1961	103
10.2995	104	471.947	461.886	0.937411		10.2985	104	432.98	425.293	0.94608		10.297	104	410.739	398.467	0.934212		10.3015	104	483.695	475.437	0.938021		10.2985	104	342.304	330.086	0.942059		10.297	104	531.136	518.709	0.950399		10.296	104	486.851	474.469	0.959604		10.3015	104	425.526	416.848	0.976711		10.296	104
10.4004	105	463.224	453.163	0.919708		10.3984	105	436.209	428.522	0.953263		10.397	105	435.052	422.78	0.991214		10.4004	105	497.712	489.454	0.965676		10.3984	105	347.847	335.629	0.957878		10.397	105	526.456	514.029	0.941824		10.396	105	482.567	470.185	0.95094		10.4024	105	425.804	417.126	0.977362		10.396	105
10.4982	106	473.868	463.807	0.94131		10.4982	106	428.403	420.716	0.935899		10.4969	106	425.903	413.631	0.969764		10.5022	106	492.188	483.93	0.954777		10.4982	106	341.866	329.648	0.940808		10.4969	106	515.267	502.84	0.921323		10.4939	106	483.655	471.273	0.95314		10.5022	106	417.172	408.494	0.957137		10.4959	106
10.6001	107	482.126	472.065	0.95807		10.5971	107	439.723	432.036	0.96108		10.5969	107	416.131	403.859	0.946853		10.6021	107	492.238	483.98	0.954876		10.5981	107	358.317	346.099	0.987759		10.5959	107	530.3	517.873	0.948867		10.5959	107	466.313	453.931	0.918066		10.6001	107	421.578	412.9	0.967461		10.5969	107
10.6999	108	459.149	449.088	0.911437		10.6979	108	445.323	437.636	0.973538		10.6968	108	439.09	426.818	1.00068		10.7019	108	502.124	493.866	0.974381		10.6979	108	339.409	327.191	0.933796		10.6968	108	529.83	517.403	0.948006		10.6958	108	489.512	477.13	0.964986		10.7019	108	424.275	415.597	0.97378		10.6968	108
10.7998	109	480.124	470.063	0.954007		10.7968	109	445.24	437.553	0.973353		10.7968	109	433.168	420.896	0.986797		10.8018	109	491.534	483.276	0.953487		10.7988	109	346.245	334.027	0.953306		10.7958	109	518.647	506.22	0.927516		10.7958	109	478.577	466.195	0.94287		10.8008	109	421.692	413.014	0.967728		10.7968	109
10.9006	110	453.956	443.895	0.900898		10.8986	110	446.513	438.826	0.976185		10.8968	110	426.548	414.276	0.971276		10.9006	110	490.786	482.528	0.952011		10.8986	110	347.323	335.105	0.956383		10.8978	110	528.424	515.997	0.94543		10.8958	110	477.745	465.363	0.941187		10.9026	110	403.166	394.488	0.92432		10.8948	110
10.9985	111	475.544	465.483	0.944712		10.9985	111	444.805	437.118	0.972385		10.9967	111	424.1	411.828	0.965537		11.0025	111	500.311	492.053	0.970804		10.9985	111	345.154	332.936	0.950192		10.9977	111	529.894	517.467	0.948123		10.9947	111	478.194	465.812	0.942095		11.0005	111	417.529	408.851	0.957973		10.9947	111
11.1003	112	480.358	470.297	0.954482		11.0983	112	441.085	433.398	0.96411		11.0957	112	437.792	425.52	0.997638		11.1003	112	503.693	495.435	0.977476		11.0983	112	331.999	319.781	0.912648		11.0957	112	530.287	517.86	0.948843		11.0967	112	476.501	464.119	0.938671		11.1003	112	419.043	410.365	0.961521		11.0967	112
11.1992	113	478.79	468.729	0.951299		11.1982	113	439.552	431.865	0.9607		11.1966	113	437.209	424.937	0.996271		11.2022	113	502.929	494.671	0.975969		11.1982	113	346.102	333.884	0.952898		11.1976	113	519.905	507.478	0.929821		11.1946	113	454.862	442.48	0.894907		11.2012	113	417.979	409.301	0.959028		11.1946	113
11.3	114	477.629	467.568	0.948943		11.299	114	437.142	429.455	0.955339		11.2966	114	436.327	424.055	0.994203		11.302	114	496.718	488.46	0.963715		11.299	114	344.745	332.527	0.949025		11.2956	114	533.201	520.774	0.954182		11.2966	114	466.087	453.705	0.917609		11.302	114	415.156	406.478	0.952413		11.2966	114
11.4009	115	475.428	465.367	0.944476		11.3989	115	442.144	434.457	0.966466		11.3955	115	429.704	417.432	0.978675		11.4009	115	492.614	484.356	0.955618		11.3969	115	341.5	329.282	0.939764		11.3975	115	523.407	510.98	0.936238		11.3965	115	481.385	469.003	0.948549		11.4029	115	422.108	413.43	0.968702		11.3955	115
11.4987	116	486.162	476.101	0.966261		11.4987	116	445.44	437.753	0.973798		11.4975	116	436.403	424.131	0.994381		11.5027	116	479.887	471.629	0.930508		11.4987	116	343.29	331.072	0.944873		11.4955	116	527.385	514.958	0.943526		11.4945	116	477.172	464.79	0.940028		11.5007	116	411.815	403.137	0.944585		11.4955	116
11.5986	117	469.328	459.267	0.932096		11.5976	117	435.764	428.077	0.952273		11.5954	117	415.841	403.569	0.946173		11.6006	117	488.945	480.687	0.948379		11.5986	117	346.088	333.87	0.952858		11.5964	117	514.052	501.625	0.919097		11.5944	117	474.743	462.361	0.935116		11.6006	117	403.117	394.439	0.924205		11.5954	117
11.6994	118	487.694	477.633	0.96937		11.6974	118	423.894	416.207	0.925868		11.6954	118	430.617	418.345	0.980816		11.7024	118	495.072	486.814	0.960467		11.6974	118	318.364	306.146	0.873734		11.6974	118	517.547	505.12	0.925501		11.6944	118	491.334	478.952	0.968671		11.7014	118	406.005	397.327	0.930972		11.6954	118
11.8002	119	486.319	476.258	0.96658		11.7992	119	444.51	436.823	0.971729		11.7954	119	422.416	410.144	0.961589		11.8012	119	495.713	487.455	0.961732		11.7992	119	339.837	327.619	0.935018		11.7964	119	520.457	508.03	0.930832		11.7964	119	473.465	461.083	0.932531		11.8012	119	420.799	412.121	0.965635		11.7974	119
11.8991	120	476.118	466.057	0.945877		11.8991	120	419.88	412.193	0.916939		11.8953	120	425.183	412.911	0.968076		11.9011	120	499.097	490.839	0.968409		11.8971	120	348.35	336.132	0.959314		11.8973	120	511.995	499.568	0.915328		11.8953	120	480.618	468.236	0.946998		11.9031	120	409.579	400.901	0.939346		11.8953	120
11.9989	121	473.674	463.613	0.940916		11.9969	121	428.034	420.347	0.935078		11.9953	121	416.16	403.888	0.946921		12.0009	121	490.961	482.703	0.952357		11.9989	121	344.275	332.057	0.947684		11.9963	121	537.671	525.244	0.962373		11.9953	121	487.906	475.524	0.961738		12.0029	121	414.026	405.348	0.949766		11.9953	121
12.0988	122	476.786	466.725	0.947232		12.0978	122	427.806	420.119	0.934571		12.0952	122	423.206	410.934	0.963441		12.1008	122	493.79	485.532	0.957938		12.0978	122	342.229	330.011	0.941844		12.0962	122	529.825	517.398	0.947997		12.0952	122	501.864	489.482	0.989967		12.1008	122	418.814	410.136	0.960984		12.0952	122
12.1996	123	481.946	471.885	0.957705		12.1986	123	431.378	423.691	0.942517		12.1962	123	417.583	405.311	0.950258		12.2006	123	497.663	489.405	0.965579		12.1976	123	332.556	320.338	0.914238		12.1962	123	528.268	515.841	0.945144		12.1952	123	491.517	479.135	0.969041		12.2016	123	407.079	398.401	0.933488		12.1952	123
12.3005	124	462.471	452.41	0.91818		12.2975	124	453.875	446.188	0.992562		12.2961	124	422.844	410.572	0.962592		12.3015	124	486.879	478.621	0.944303		12.2995	124	348.138	335.92	0.958709		12.2961	124	511.45	499.023	0.914329		12.2951	124	488.507	476.125	0.962953		12.3015	124	402.094	393.416	0.921808		12.2971	124
12.3993	125	487.443	477.382	0.968861		12.3973	125	438.325	430.638	0.95797		12.3971	125	434.507	422.235	0.989936		12.4013	125	488.632	480.374	0.947762		12.3973	125	341.506	329.288	0.939781		12.3961	125	524.019	511.592	0.937359		12.3951	125	486.113	473.731	0.958111		12.4013	125	409.099	400.421	0.938221		12.3951	125
12.4992	126	474.07	464.009	0.94172		12.4972	126	423.781	416.094	0.925617		12.4961	126	418.535	406.263	0.95249		12.5012	126	495.577	487.319	0.961464		12.4992	126	336.716	324.498	0.92611		12.4961	126	532.291	519.864	0.952515		12.4951	126	491.776	479.394	0.969565		12.5012	126	432.663	423.985	0.993434		12.4961	126
12.599	127	466.336	456.275	0.926024		12.597	127	428.862	421.175	0.93692		12.596	127	419.437	407.165	0.954604		12.601	127	483.065	474.807	0.936778		12.599	127	353.599	341.381	0.974294		12.596	127	538.218	525.791	0.963375		12.595	127	490.721	478.339	0.967431		12.601	127	412.434	403.756	0.946035		12.596	127
12.6989	128	473.07	463.009	0.93969		12.6979	128	433.342	425.655	0.946886		12.696	128	440.961	428.689	1.00507		12.7009	128	511.29	503.032	0.992465		12.6979	128	344.336	332.118	0.947858		12.696	128	517.513	505.086	0.925438		12.695	128	483.65	471.268	0.95313		12.7019	128	420.406	411.728	0.964715		12.696	128
12.7997	129	477.231	467.17	0.948135		12.7977	129	438.602	430.915	0.958587		12.7959	129	417.268	404.996	0.949519		12.8017	129	507.711	499.453	0.985404		12.7977	129	343.674	331.456	0.945968		12.7969	129	520.074	507.647	0.930131		12.7949	129	480.92	468.538	0.947608		12.8017	129	417.993	409.315	0.959061		12.7959	129
12.8996	130	471.302	461.241	0.936102		12.8976	130	429.41	421.723	0.938139		12.8959	130	427.914	415.642	0.974479		12.9016	130	489.834	481.576	0.950133		12.8976	130	343.88	331.662	0.946556		12.8969	130	515.235	502.808	0.921264		12.8949	130	488.214	475.832	0.96236		12.9036	130	414.97	406.292	0.951977		12.8959	130
12.9994	131	486.381	476.32	0.966706		12.9974	131	429.495	421.808	0.938328		12.9958	131	433.123	420.851	0.986691		13.0014	131	500.785	492.527	0.971739		12.9994	131	336.467	324.249	0.9254		12.9968	131	516.75	504.323	0.92404		12.9958	131	496.19	483.808	0.978492		13.0014	131	410.529	401.851	0.941572		12.9958	131
13.0992	132	488.865	478.804	0.971747		13.0972	132	429.893	422.206	0.939213		13.0958	132	429.73	417.458	0.978736		13.1012	132	507.671	499.413	0.985325		13.0982	132	346.218	334	0.953229		13.0968	132	536.008	523.581	0.959326		13.0958	132	483.452	471.07	0.952729		13.1012	132	409.772	401.094	0.939798		13.0958	132
13.1991	133	463.238	453.177	0.919736		13.1981	133	426.251	418.564	0.931111		13.1958	133	423.471	411.199	0.964062		13.2011	133	482.215	473.957	0.935101		13.1981	133	349.831	337.613	0.96354		13.1968	133	531.193	518.766	0.950503		13.1958	133	494.266	481.884	0.9746		13.2021	133	421.257	412.579	0.966708		13.1958	133
13.2999	134	468.799	458.738	0.931022		13.2979	134	436.945	429.258	0.954901		13.2967	134	441.482	429.21	1.00629		13.3019	134	482.828	474.57	0.93631		13.2979	134	366.447	354.229	1.01096		13.2967	134	544.897	532.47	0.975612		13.2957	134	481.02	468.638	0.947811		13.3019	134	420.396	411.718	0.964691		13.2957	134
13.3998	135	471.71	461.649	0.93693		13.3998	135	422.878	415.191	0.923608		13.3947	135	420.562	408.29	0.957242		13.4018	135	494.284	486.026	0.958913		13.3978	135	353.429	341.211	0.973809		13.3967	135	535.362	522.935	0.958142		13.3957	135	487.01	474.628	0.959925		13.4018	135	417.598	408.92	0.958135		13.3957	135
13.4996	136	470.9	460.839	0.935286		13.4976	136	417.809	410.122	0.912332		13.4966	136	422.242	409.97	0.961181		13.5016	136	484.162	475.904	0.938942		13.4976	136	343.289	331.071	0.94487		13.4966	136	536.117	523.69	0.959525		13.4936	136	489.941	477.559	0.965853		13.5016	136	417.282	408.604	0.957395		13.4956	136
13.5995	137	472.186	462.125	0.937896		13.5975	137	429.593	421.906	0.938546		13.5966	137	423.803	411.531	0.96484		13.6015	137	490.156	481.898	0.950768		13.5985	137	348.843	336.625	0.960721		13.5966	137	526.43	514.003	0.941776		13.5956	137	477.536	465.154	0.940764		13.6015	137	428.773	420.095	0.984319		13.5966	137
13.6993	138	485.419	475.358	0.964753		13.6983	138	417.53	409.843	0.911711		13.6965	138	421.719	409.447	0.959955		13.7013	138	490.744	482.486	0.951928		13.6983	138	359.789	347.571	0.99196		13.6965	138	524.874	512.447	0.938925		13.6955	138	480.663	468.281	0.947089		13.7013	138	411.516	402.838	0.943884		13.6965	138
13.8002	139	483.474	473.413	0.960806		13.7982	139	436.134	428.447	0.953097		13.7965	139	427.594	415.322	0.973729		13.8022	139	505.911	497.653	0.981852		13.7982	139	345.297	333.079	0.9506		13.7965	139	529.259	516.832	0.94696		13.7955	139	475.259	462.877	0.936159		13.8022	139	430.602	421.924	0.988605		13.7965	139
13.9	140	470.923	460.862	0.935333		13.898	140	422.953	415.266	0.923775		13.8944	140	414.809	402.537	0.943754		13.902	140	500.208	491.95	0.970601		13.898	140	353.395	341.177	0.973712		13.8965	140	516.378	503.951	0.923359		13.8954	140	480.238	467.856	0.946229		13.902	140	426.073	417.395	0.977993		13.8965	140
13.9979	141	472.635	462.574	0.938808		13.9979	141	441.413	433.726	0.96484		13.9964	141	423.102	410.83	0.963197		14.0019	141	501.487	493.229	0.973124		13.9979	141	352.272	340.054	0.970507		13.9974	141	512.097	499.67	0.915515		13.9944	141	482.249	469.867	0.950296		14.0019	141	433.184	424.506	0.994654		13.9944	141
14.0997	142	485.767	475.706	0.965459		14.0967	142	420.723	413.036	0.918814		14.0964	142	424.656	412.384	0.96684		14.1007	142	514.503	506.245	0.998804		14.0977	142	341.744	329.526	0.94046		14.0974	142	517.808	505.381	0.925979		14.0954	142	488.324	475.942	0.962583		14.1017	142	414.261	405.583	0.950316		14.0964	142
14.1996	143	470.974	460.913	0.935437		14.1986	143	444.486	436.799	0.971676		14.1963	143	430.761	418.489	0.981154		14.2016	143	508.918	500.66	0.987785		14.1986	143	369.556	357.338	1.01984		14.1973	143	524.087	511.66	0.937483		14.1963	143	500.934	488.552	0.988086		14.2016	143	430.241	421.563	0.987759		14.1943	143
14.3004	144	485.489	475.428	0.964895		14.2984	144	418.329	410.642	0.913489		14.2963	144	416.139	403.867	0.946872		14.3024	144	497.482	489.224	0.965222		14.2984	144	344.611	332.393	0.948643		14.2973	144	520.226	507.799	0.930409		14.2963	144	489.428	477.046	0.964816		14.3024	144	428.503	419.825	0.983686		14.2963	144
14.4003	145	466.115	456.054	0.925575		14.3983	145	441.571	433.884	0.965191		14.3952	145	423.092	410.82	0.963174		14.4003	145	484.848	476.59	0.940296		14.3983	145	347.986	335.768	0.958275		14.3972	145	517.673	505.246	0.925731		14.3962	145	483.078	470.696	0.951973		14.4023	145	427.269	418.591	0.980795		14.3962	145
14.4981	146	472.36	462.299	0.93825		14.4981	146	421.712	414.025	0.921014		14.4972	146	437.075	424.803	0.995957		14.5021	146	483.322	475.064	0.937285		14.4981	146	344.169	331.951	0.947381		14.4972	146	528.375	515.948	0.94534		14.4942	146	484.081	471.699	0.954002		14.5021	146	428.499	419.821	0.983677		14.4952	146
14.5999	147	467.907	457.846	0.929212		14.5979	147	416.998	409.311	0.910528		14.5971	147	420.023	407.751	0.955978		14.6019	147	492.653	484.395	0.955695		14.5979	147	352.676	340.458	0.97166		14.5951	147	531.455	519.028	0.950983		14.5961	147	486.099	473.717	0.958083		14.6009	147	413.933	405.255	0.949548		14.5961	147
14.6988	148	479.154	469.093	0.952038		14.6988	148	413.58	405.893	0.902924		14.6971	148	420.175	407.903	0.956335		14.7018	148	491.31	483.052	0.953045		14.6988	148	352.318	340.1	0.970638		14.6971	148	529.741	517.314	0.947843		14.6941	148	485.902	473.52	0.957684		14.7018	148	431.421	422.743	0.990524		14.6961	148
14.8006	149	464.844	454.783	0.922996		14.7986	149	416.898	409.211	0.910305		14.7971	149	423.317	411.045	0.963701		14.8026	149	483.712	475.454	0.938055		14.7986	149	355.624	343.406	0.980074		14.7971	149	514.411	501.984	0.919755		14.7961	149	487.284	474.902	0.96048		14.8006	149	417.661	408.983	0.958283		14.7971	149
14.9005	150	474.231	464.17	0.942047		14.8985	150	422.434	414.747	0.92262		14.895	150	425.06	412.788	0.967788		14.9005	150	477.786	469.528	0.926363		14.8985	150	344.276	332.058	0.947687		14.897	150	523.432	511.005	0.936283		14.895	150	481.137	468.755	0.948047		14.9025	150	415.887	407.209	0.954126		14.895	150
14.9983	151	478.054	467.993	0.949806		14.9983	151	423.681	415.994	0.925394		14.995	151	414.594	402.322	0.94325		15.0023	151	499.056	490.798	0.968328		14.9983	151	352.074	339.856	0.969942		14.997	151	514.976	502.549	0.92079		14.995	151	490.57	478.188	0.967125		15.0023	151	408.112	399.434	0.935909		14.995	151
15.0992	152	466.721	456.66	0.926805		15.0972	152	424.03	416.343	0.926171		15.0949	152	434.064	421.792	0.988898		15.1022	152	502.094	493.836	0.974322		15.0982	152	339.798	327.58	0.934906		15.0959	152	516.53	504.103	0.923637		15.0949	152	484.06	471.678	0.953959		15.1012	152	404.847	396.169	0.928258		15.0969	152
15.199	153	469.148	459.087	0.931731		15.199	153	430.495	422.808	0.940552		15.1969	153	438.738	426.466	0.999856		15.202	153	497.615	489.357	0.965485		15.197	153	340.921	328.703	0.938111		15.1979	153	533.067	520.64	0.953937		15.1949	153	500.134	487.752	0.986468		15.202	153	428.336	419.658	0.983295		15.1949	153
15.3009	154	466.084	456.023	0.925512		15.2969	154	423.455	415.768	0.924892		15.2968	154	407.97	395.698	0.92772		15.3009	154	492.014	483.756	0.954434		15.2989	154	346.62	334.402	0.954376		15.2958	154	527.07	514.643	0.942949		15.2958	154	502.722	490.34	0.991703		15.3009	154	411.778	403.1	0.944498		15.2968	154
15.3987	155	463.086	453.025	0.919428		15.3987	155	443.72	436.033	0.969972		15.3958	155	414.277	402.005	0.942507		15.4007	155	488.608	480.35	0.947714		15.3987	155	354.099	341.881	0.975721		15.3978	155	529.483	517.056	0.94737		15.3948	155	496.69	484.308	0.979503		15.4027	155	422.516	413.838	0.969658		15.3948	155
15.4986	156	474.173	464.112	0.941929		15.4986	156	426.18	418.493	0.930953		15.4958	156	419.43	407.158	0.954588		15.5026	156	504.358	496.1	0.978788		15.4986	156	349.569	337.351	0.962793		15.4958	156	529.937	517.51	0.948202		15.4948	156	494.201	481.819	0.974469		15.5026	156	403.857	395.179	0.925939		15.4958	156
15.5994	157	483.786	473.725	0.961439		15.5974	157	436.224	428.537	0.953297		15.5957	157	426.383	414.111	0.970889		15.6014	157	487.906	479.648	0.946329		15.5984	157	342.491	330.273	0.942592		15.5957	157	526.068	513.641	0.941113		15.5947	157	486.127	473.745	0.95814		15.6014	157	422.819	414.141	0.970368		15.5957	157
15.6993	158	474.372	464.311	0.942333		15.6993	158	420.682	412.995	0.918723		15.6977	158	424.624	412.352	0.966765		15.7023	158	485.718	477.46	0.942012		15.6973	158	351.367	339.149	0.967924		15.6957	158	534.569	522.142	0.956689		15.6947	158	492.135	479.753	0.970291		15.7013	158	411.713	403.035	0.944346		15.6957	158
15.8011	159	474.763	464.702	0.943126		15.7971	159	428.395	420.708	0.935881		15.7956	159	413.629	401.357	0.940987		15.8011	159	501.87	493.612	0.97388		15.7991	159	335.718	323.5	0.923262		15.7956	159	528.665	516.238	0.945871		15.7946	159	486.669	474.287	0.959236		15.8011	159	416.789	408.111	0.95624		15.7966	159
15.8989	160	469.2	459.139	0.931836		15.8989	160	439.363	431.676	0.96028		15.8956	160	436.406	424.134	0.994388		15.9009	160	486.178	477.92	0.94292		15.8969	160	350.149	337.931	0.964448		15.8976	160	540.775	528.348	0.96806		15.8946	160	482.077	469.695	0.949948		15.9009	160	421.866	413.188	0.968135		15.8956	160
15.9988	161	473.064	463.003	0.939678		15.9978	161	436.638	428.951	0.954218		15.9955	161	425.298	413.026	0.968346		16.0008	161	487.764	479.506	0.946049		15.9988	161	345.481	333.263	0.951126		15.9965	161	532.804	520.377	0.953455		15.9945	161	483.614	471.232	0.953057		16.0008	161	413.966	405.288	0.949625		15.9955	161
16.0996	162	481.005	470.944	0.955795		16.0976	162	441.354	433.667	0.964709		16.0955	162	434.192	421.92	0.989198		16.1006	162	492.187	483.929	0.954775		16.0986	162	348.263	336.045	0.959065		16.0965	162	542.346	529.919	0.970938		16.0955	162	487.413	475.031	0.96074		16.1016	162	409.269	400.591	0.93862		16.0955	162
16.1995	163	477.354	467.293	0.948385		16.1995	163	416.57	408.883	0.909576		16.1955	163	419.781	407.509	0.955411		16.2015	163	490.347	482.089	0.951145		16.1975	163	339.26	327.042	0.933371		16.1965	163	539.85	527.423	0.966365		16.1955	163	493.511	481.129	0.973074		16.2015	163	416.728	408.05	0.956097		16.1955	163
16.3013	164	464.828	454.767	0.922963		16.2973	164	426.334	418.647	0.931296		16.2954	164	434.021	421.749	0.988797		16.3013	164	480.41	472.152	0.93154		16.2973	164	331.827	319.609	0.912157		16.2964	164	528.949	516.522	0.946392		16.2954	164	496.409	484.027	0.978935		16.3013	164	409.818	401.14	0.939906		16.2954	164
16.3992	165	472.472	462.411	0.938477		16.3972	165	420.82	413.133	0.91903		16.3964	165	426.208	413.936	0.970479		16.4012	165	470.094	461.836	0.911187		16.3972	165	334	321.782	0.918359		16.3964	165	526.598	514.171	0.942084		16.3954	165	509.923	497.541	1.00627		16.4032	165	411.923	403.245	0.944838		16.3954	165
16.499	166	460.107	450.046	0.913382		16.497	166	420.079	412.392	0.917382		16.4963	166	414.309	402.037	0.942582		16.501	166	479.836	471.578	0.930407		16.499	166	351.567	339.349	0.968495		16.4963	166	531.705	519.278	0.951441		16.4953	166	498.102	485.72	0.982359		16.501	166	417.851	409.173	0.958728		16.4953	166
16.5989	167	470	459.939	0.93346		16.5979	167	436.86	429.173	0.954712		16.5963	167	425.388	413.116	0.968557		16.6009	167	481.599	473.341	0.933886		16.5979	167	362.436	350.218	0.999515		16.5963	167	534.049	521.622	0.955736		16.5953	167	485.578	473.196	0.957029		16.6019	167	408.162	399.484	0.936026		16.5953	167
16.6997	168	473.293	463.232	0.940143		16.6977	168	435.077	427.39	0.950745		16.6962	168	425.037	412.765	0.967734		16.7017	168	497.692	489.434	0.965637		16.6977	168	350.159	337.941	0.964477		16.6962	168	517.444	505.017	0.925312		16.6952	168	495.31	482.928	0.976712		16.7017	168	427.104	418.426	0.980409		16.6962	168
16.7996	169	472.312	462.251	0.938152		16.7976	169	419.796	412.109	0.916752		16.7962	169	431.204	418.932	0.982192		16.8016	169	503.609	495.351	0.977311		16.7976	169	363.636	351.418	1.00294		16.7962	169	529.849	517.422	0.948041		16.7952	169	495.878	483.496	0.977861		16.8016	169	413.203	404.525	0.947837		16.7962	169
16.8994	170	468.28	458.219	0.929969		16.8974	170	443.577	435.89	0.969654		16.8961	170	410.402	398.13	0.933422		16.9014	170	489.47	481.212	0.949415		16.8974	170	346.683	334.465	0.954556		16.8961	170	527.513	515.086	0.943761		16.8951	170	488.885	476.503	0.963718		16.9014	170	419.328	410.65	0.962189		16.8961	170
16.9993	171	481.495	471.434	0.956789		16.9973	171	423.315	415.628	0.92458		16.9961	171	435.451	423.179	0.992149		17.0013	171	490.263	482.005	0.950979		16.9983	171	339.975	327.757	0.935412		16.9971	171	526.41	513.983	0.94174		16.9951	171	487.546	475.164	0.961009		17.0013	171	418.442	409.764	0.960113		16.9961	171
17.0991	172	482.843	472.782	0.959525		17.0981	172	435.533	427.846	0.95176		17.0961	172	423.002	410.73	0.962963		17.1011	172	492.673	484.415	0.955734		17.0981	172	345.759	333.541	0.951919		17.0971	172	523.605	511.178	0.9366		17.0951	172	484.427	472.045	0.954701		17.1021	172	408.766	400.088	0.937441		17.0961	172
17.2	173	490.087	480.026	0.974227		17.1979	173	431.349	423.662	0.942452		17.196	173	419.348	407.076	0.954396		17.202	173	503.51	495.252	0.977115		17.1979	173	348.139	335.921	0.958711		17.197	173	528.351	515.924	0.945296		17.195	173	478.854	466.472	0.94343		17.202	173	412.077	403.399	0.945199		17.196	173
17.2998	174	474.965	464.904	0.943536		17.2978	174	439.945	432.258	0.961574		17.296	174	415.53	403.258	0.945444		17.3018	174	491.186	482.928	0.952801		17.2998	174	347.688	335.47	0.957424		17.297	174	522.214	509.787	0.934052		17.296	174	495.316	482.934	0.976724		17.3018	174	405.92	397.242	0.930773		17.296	174
17.3996	175	473.855	463.794	0.941284		17.3996	175	442.977	435.29	0.968319		17.3959	175	418.652	406.38	0.952764		17.4016	175	493.671	485.413	0.957703		17.3976	175	347.821	335.603	0.957804		17.3969	175	516.567	504.14	0.923705		17.3959	175	491.465	479.083	0.968936		17.4016	175	419.234	410.556	0.961968		17.3959	175
17.4995	176	474.775	464.714	0.943151		17.4975	176	434.181	426.494	0.948752		17.4959	176	420.694	408.422	0.957551		17.5015	176	472.849	464.591	0.916622		17.4985	176	338.944	326.726	0.932469		17.4969	176	515.329	502.902	0.921437		17.4959	176	488.649	476.267	0.96324		17.5015	176	410.579	401.901	0.941689		17.4959	176
17.5993	177	466.6	456.539	0.926559		17.5983	177	431.402	423.715	0.94257		17.5968	177	415.605	403.333	0.94562		17.6013	177	495.444	487.186	0.961201		17.5983	177	357.529	345.311	0.98551		17.5968	177	523.798	511.371	0.936954		17.5958	177	495.938	483.556	0.977982		17.6013	177	421.171	412.493	0.966507		17.5958	177
17.7002	178	469.752	459.691	0.932957		17.6982	178	443.208	435.521	0.968833		17.6968	178	404.591	392.319	0.919798		17.7022	178	481.445	473.187	0.933582		17.6982	178	355.66	343.442	0.980176		17.6968	178	542.883	530.456	0.971922		17.6958	178	492.754	480.372	0.971543		17.7022	178	402.34	393.662	0.922384		17.6958	178
17.8	179	482.019	471.958	0.957853		17.798	179	441.19	433.503	0.964344		17.7968	179	431.171	418.899	0.982115		17.802	179	492.995	484.737	0.95637		17.798	179	341.091	328.873	0.938597		17.7968	179	530.888	518.461	0.949945		17.7958	179	498.715	486.333	0.983599		17.802	179	400.251	391.573	0.91749		17.7958	179
17.8999	180	472.789	462.728	0.93912		17.8979	180	433.963	426.276	0.948267		17.8947	180	421.095	408.823	0.958492		17.8999	180	509.337	501.079	0.988612		17.8979	180	337.175	324.957	0.92742		17.8967	180	523.444	511.017	0.936305		17.8957	180	490.768	478.386	0.967526		17.9019	180	413.484	404.806	0.948496		17.8967	180
17.9997	181	477.28	467.219	0.948235		17.9977	181	428.657	420.97	0.936464		17.9967	181	411.993	399.721	0.937152		18.0017	181	514.498	506.24	0.998794		17.9977	181	349.768	337.55	0.963361		17.9967	181	533.473	521.046	0.954681		17.9947	181	472.738	460.356	0.931061		18.0017	181	425.105	416.427	0.975725		17.9967	181
18.0996	182	484.704	474.643	0.963302		18.0986	182	431.254	423.567	0.942241		18.0946	182	421.336	409.064	0.959057		18.1016	182	497.923	489.665	0.966092		18.0986	182	339.926	327.708	0.935272		18.0966	182	520.929	508.502	0.931697		18.0956	182	484.728	472.346	0.95531		18.1016	182	421.272	412.594	0.966744		18.0966	182
18.2004	183	458.704	448.643	0.910534		18.1984	183	431.009	423.322	0.941696		18.1966	183	419.883	407.611	0.95565		18.2024	183	494.645	486.387	0.959625		18.1984	183	349.036	336.818	0.961272		18.1976	183	526.545	514.118	0.941987		18.1956	183	479.869	467.487	0.945483		18.2024	183	426.864	418.186	0.979846		18.1946	183
18.3003	184	475.414	465.353	0.944448		18.2983	184	451.776	444.089	0.987893		18.2955	184	417.187	404.915	0.949329		18.3023	184	506.058	497.8	0.982142		18.2983	184	351.868	339.65	0.969354		18.2975	184	530.293	517.866	0.948854		18.2955	184	477.586	465.204	0.940866		18.3003	184	412.352	403.674	0.945843		18.2965	184
18.4001	185	463.289	453.228	0.91984		18.3981	185	429.04	421.353	0.937316		18.3955	185	425.399	413.127	0.968582		18.4001	185	479.245	470.987	0.929241		18.3981	185	345.632	333.414	0.951557		18.3975	185	530.236	517.809	0.94875		18.3965	185	490.17	477.788	0.966316		18.4021	185	421.741	413.063	0.967843		18.3945	185
18.499	186	488.66	478.599	0.971331		18.498	186	441.642	433.955	0.965349		18.4965	186	412.002	399.73	0.937173		18.502	186	491.831	483.573	0.954073		18.498	186	338.813	326.595	0.932095		18.4975	186	530.064	517.637	0.948435		18.4945	186	485.852	473.47	0.957583		18.502	186	419.403	410.725	0.962364		18.4965	186
18.5998	187	463.499	453.438	0.920266		18.5988	187	432.232	424.545	0.944416		18.5964	187	421.212	408.94	0.958766		18.6008	187	496.83	488.572	0.963936		18.5988	187	342.101	329.883	0.941479		18.5954	187	526.682	514.255	0.942238		18.5964	187	476.182	463.8	0.938026		18.6008	187	422.562	413.884	0.969766		18.5964	187
18.7006	188	487.1	477.039	0.968165		18.6986	188	439.845	432.158	0.961352		18.6964	188	429.368	417.096	0.977888		18.7026	188	496.327	488.069	0.962944		18.6966	188	340.506	328.288	0.936927		18.6974	188	525.595	513.168	0.940246		18.6964	188	483.947	471.565	0.953731		18.7026	188	414.996	406.318	0.952038		18.6954	188
18.8005	189	474.215	464.154	0.942014		18.7985	189	426.141	418.454	0.930867		18.7953	189	419.542	407.27	0.954851		18.8005	189	503.768	495.51	0.977624		18.7985	189	340.529	328.311	0.936993		18.7973	189	524.801	512.374	0.938792		18.7963	189	491.54	479.158	0.969087		18.8025	189	404.118	395.44	0.92655		18.7963	189
18.9003	190	476.035	465.974	0.945708		18.8983	190	427.88	420.193	0.934735		18.8953	190	419.522	407.25	0.954804		18.9003	190	509.563	501.305	0.989058		18.8983	190	347.467	335.249	0.956794		18.8973	190	539.858	527.431	0.96638		18.8943	190	496.107	483.725	0.978324		18.9023	190	423.188	414.51	0.971233		18.8953	190
18.9992	191	456.556	446.495	0.906175		18.9982	191	433.557	425.87	0.947364		18.9972	191	417.499	405.227	0.950061		19.0022	191	492.18	483.922	0.954762		18.9982	191	351.351	339.133	0.967878		18.9962	191	528.698	516.271	0.945932		18.9942	191	487.626	475.244	0.961171		19.0012	191	430.998	422.32	0.989532		18.9952	191
19.1	192	459.929	449.868	0.91302		19.097	192	430.881	423.194	0.941411		19.0952	192	415.078	402.806	0.944385		19.101	192	497.717	489.459	0.965686		19.099	192	336.543	324.325	0.925617		19.0972	192	527.892	515.465	0.944455		19.0962	192	484.681	472.299	0.955215		19.101	192	414.552	405.874	0.950998		19.0952	192
19.1989	193	461.196	451.135	0.915592		19.1989	193	428.631	420.944	0.936406		19.1972	193	424.418	412.146	0.966282		19.2029	193	497.909	489.651	0.966065		19.1969	193	334.663	322.445	0.920251		19.1972	193	514.007	501.58	0.919014		19.1952	193	482.389	470.007	0.95058		19.2009	193	417.136	408.458	0.957053		19.1952	193
19.3007	194	461.991	451.93	0.917205		19.2967	194	442.731	435.044	0.967772		19.2951	194	433.747	421.475	0.988154		19.3007	194	495.018	486.76	0.960361		19.2987	194	335.674	323.456	0.923137		19.2961	194	531.348	518.921	0.950787		19.2951	194	492.718	480.336	0.97147		19.3027	194	418.668	409.99	0.960642		19.2971	194
19.3986	195	473.485	463.424	0.940533		19.3986	195	435.843	428.156	0.952449		19.3951	195	425.871	413.599	0.969689		19.4006	195	491.73	483.472	0.953874		19.3976	195	336.072	323.854	0.924273		19.3981	195	524.643	512.216	0.938502		19.3961	195	497.015	484.633	0.98016		19.4026	195	422.827	414.149	0.970387		19.3951	195
19.4994	196	457.341	447.28	0.907768		19.4984	196	431.286	423.599	0.942312		19.496	196	431.259	418.987	0.982321		19.5014	196	483.919	475.661	0.938463		19.4984	196	348.46	336.242	0.959628		19.496	196	539.188	526.761	0.965152		19.495	196	498.509	486.127	0.983182		19.5014	196	421.519	412.841	0.967322		19.495	196
19.6003	197	471.444	461.383	0.93639		19.5973	197	460.395	452.708	1.00707		19.596	197	424.371	412.099	0.966172		19.6013	197	471.596	463.338	0.91415		19.5973	197	343.915	331.697	0.946656		19.596	197	532.002	519.575	0.951986		19.595	197	490.778	478.396	0.967546		19.6013	197	419.923	411.245	0.963583		19.595	197
19.6991	198	461.607	451.546	0.916426		19.6991	198	437.577	429.89	0.956307		19.6969	198	414.21	401.938	0.94235		19.7031	198	475.122	466.864	0.921107		19.6971	198	354.075	341.857	0.975653		19.6979	198	530.114	517.687	0.948526		19.6949	198	492.425	480.043	0.970877		19.7031	198	414.021	405.343	0.949754		19.6949	198
19.801	199	481.176	471.115	0.956142		19.797	199	436.019	428.332	0.952841		19.7959	199	414.414	402.142	0.942828		19.801	199	489.329	481.071	0.949137		19.799	199	346.603	334.385	0.954328		19.7959	199	522.275	509.848	0.934163		19.7949	199	488.77	476.388	0.963485		19.801	199	420.671	411.993	0.965335		19.7969	199
19.8988	200	478.331	468.27	0.950368		19.8978	200	431.595	423.908	0.942999		19.8958	200	419.867	407.595	0.955612		19.9008	200	478.133	469.875	0.927047		19.8978	200	337.745	325.527	0.929047		19.8958	200	520.106	507.679	0.930189		19.8948	200	502.601	490.219	0.991458		19.9008	200	418.689	410.011	0.960691		19.8958	200
[truncated: 12 more columns]

## Sheet: MRC5 16hUV
Cell 00						Cell 01						Cell 02						Cell 03						Cell 04						Cell 05						Cell 06						Cell 07						Cell 08
	paste BG		average pre-bleach				paste BG		average pre-bleach				paste BG		average pre-bleach				paste BG		average pre-bleach				paste BG		average pre-bleach				paste BG		average pre-bleach				paste BG		average pre-bleach				paste BG		average pre-bleach				paste BG
	1	13.016	578.008				1	14.092	989.395				1	11.342	493.555				1	13.485	430.957				1	12.611	566.156				1	11.502	575.499				1	12.789	399.14				1	13.142	706.871				1
	paste FRAP	RAW					paste FRAP	RAW					paste FRAP	RAW					paste FRAP	RAW					paste FRAP	RAW					paste FRAP	RAW					paste FRAP	RAW					paste FRAP	RAW					paste FRAP
Time	data here		minus BG	Normalized		Time	data here		minus BG	Normalized		Time	data here		minus BG	Normalized		Time	data here		minus BG	Normalized		Time	data here		minus BG	Normalized		Time	data here		minus BG	Normalized		Time	data here		minus BG	Normalized		Time	data here		minus BG	Normalized		Time	data here
0	1	648.335	635.319	1.09915		0	1	1090.07	1075.97	1.08751		0	1	526.495	515.153	1.04376		0	1	480.537	467.052	1.08376		0	1	632.256	619.645	1.09448		0	1	633	621.498	1.07993		0	1	438.88	426.091	1.06752		0	1	797.534	784.392	1.10967		0	1
0.0798342	2	625.74	612.724	1.06006		0.0779433	2	1052.65	1038.56	1.04969		0.0798342	2	521.931	510.589	1.03451		0.0798342	2	477.041	463.556	1.07564		0.0798342	2	618.068	605.457	1.06942		0.0798342	2	626.838	615.336	1.06922		0.0798342	2	441.731	428.942	1.07466		0.0798342	2	747.304	734.162	1.03861		0.0779433	2
0.171676	3	634.002	620.986	1.07436		0.171896	3	1068.45	1054.36	1.06566		0.171676	3	515.565	504.223	1.02162		0.170675	3	462.642	449.157	1.04223		0.171676	3	605.907	593.296	1.04794		0.171676	3	613.23	601.728	1.04558		0.170675	3	447.233	434.444	1.08845		0.170675	3	756.365	743.223	1.05143		0.170896	3
0.269521	4	641.43	628.414	1.08721		0.271853	4	1045.42	1031.33	1.04238		0.271522	4	520.554	509.212	1.03172		0.272523	4	464.055	450.57	1.04551		0.271522	4	615.593	602.982	1.06504		0.271522	4	623.182	611.68	1.06287		0.272523	4	443.206	430.417	1.07836		0.270521	4	746.131	732.989	1.03695		0.270852	4
0.370368	5	621.299	608.283	1.05238		0.371809	5	1061.87	1047.78	1.05901		0.371368	5	525.867	514.525	1.04249		0.370368	5	461.866	448.381	1.04043		0.371368	5	597.321	584.71	1.03277		0.371368	5	603.97	592.468	1.02949		0.372369	5	448.766	435.977	1.09229		0.370368	5	755.424	742.282	1.05009		0.370809	5
0.470214	6	613.917	600.901	1.03961		0.471766	6	1045.37	1031.28	1.04233		0.472215	6	524.267	512.925	1.03925		0.471215	6	447.928	434.443	1.00809		0.471215	6	591.47	578.859	1.02244		0.472215	6	611.248	599.746	1.04213		0.470214	6	426.911	414.122	1.03754		0.471215	6	718.854	705.712	0.99836		0.471766	6
0.57006	7	595.45	582.434	1.00766		0.571723	7	1053.4	1039.31	1.05045		0.572061	7	522.762	511.42	1.0362		0.571061	7	446.217	432.732	1.00412		0.572061	7	601.415	588.804	1.04		0.572061	7	613.766	602.264	1.04651		0.572061	7	427.815	415.026	1.0398		0.571061	7	731.778	718.636	1.01664		0.572723	7
0.671908	8	585.49	572.474	0.990426		0.671679	8	1066.74	1052.65	1.06393		0.671908	8	502.314	490.972	0.994767		0.670907	8	457.794	444.309	1.03098		0.671908	8	606.535	593.924	1.04905		0.671908	8	599.158	587.656	1.02112		0.670907	8	415.016	402.227	1.00773		0.670907	8	742.194	729.052	1.03138		0.671679	8
0.769753	9	589.371	576.355	0.997141		0.771636	9	1031.18	1017.09	1.02799		0.771754	9	510.996	499.654	1.01236		0.772755	9	448.71	435.225	1.0099		0.771754	9	595.255	582.644	1.02912		0.771754	9	589.91	578.408	1.00506		0.772755	9	425.101	412.312	1.033		0.770753	9	745.603	732.461	1.0362		0.771636	9
0.8706	10	606.746	593.73	1.0272		0.871592	10	1042.45	1028.36	1.03938		0.8716	10	494.78	483.438	0.979502		0.8706	10	449.736	436.251	1.01228		0.8716	10	581.839	569.228	1.00543		0.8716	10	594.426	582.924	1.0129		0.8706	10	416.666	403.877	1.01187		0.8706	10	747.328	734.186	1.03864		0.871592	10
0.971447	11	611.699	598.683	1.03577		0.971549	11	1030.51	1016.41	1.02731		0.972447	11	501.481	490.139	0.993079		0.970446	11	435.494	422.009	0.979238		0.971447	11	590.757	578.146	1.02118		0.972447	11	594.107	582.605	1.01235		0.970446	11	416.362	403.573	1.01111		0.971447	11	731.357	718.215	1.01605		0.971549	11
1.07029	12	586.329	573.313	0.991878		1.07151	12	1010.13	996.042	1.00672		1.07229	12	507.308	495.966	1.00489		1.07129	12	440.931	427.446	0.991854		1.07229	12	594.163	581.552	1.02719		1.07229	12	588.13	576.628	1.00196		1.07229	12	418.884	406.095	1.01742		1.07129	12	722.596	709.454	1.00365		1.07151	12
1.17014	13	580.074	567.058	0.981056		1.17146	13	998.03	983.938	0.994484		1.17214	13	505.711	494.369	1.00165		1.17114	13	438.028	424.543	0.985118		1.17214	13	586.022	573.411	1.01281		1.17214	13	581.415	569.913	0.990294		1.17114	13	419.504	406.715	1.01898		1.17114	13	719.838	706.696	0.999752		1.17146	13
1.26998	14	588.612	575.596	0.995828		1.27242	14	991.738	977.646	0.988125		1.27199	14	509.9	498.558	1.01014		1.27099	14	443.234	429.749	0.997198		1.27199	14	573.624	561.013	0.990915		1.27199	14	583.495	571.993	0.993909		1.27299	14	415.599	402.81	1.00919		1.27099	14	739.283	726.141	1.02726		1.27142	14
1.37083	15	584.758	571.742	0.98916		1.37238	15	998.521	984.429	0.99498		1.37183	15	504.822	493.48	0.999848		1.37083	15	439.43	425.945	0.988371		1.37183	15	586.74	574.129	1.01408		1.37183	15	596.96	585.458	1.01731		1.37283	15	410.525	397.736	0.996482		1.37083	15	729.135	715.993	1.0129		1.37138	15
1.47068	16	603.25	590.234	1.02115		1.47233	16	1008.1	994.005	1.00466		1.47268	16	498.474	487.132	0.986987		1.47068	16	451.023	437.538	1.01527		1.47168	16	557.478	544.867	0.962396		1.47268	16	576.516	565.014	0.981782		1.47068	16	400.422	387.633	0.97117		1.47068	16	716.991	703.849	0.995724		1.47133	16
1.57052	17	594.525	581.509	1.00606		1.57229	17	1004.45	990.359	1.00097		1.57253	17	511.689	500.347	1.01376		1.57153	17	445.393	431.908	1.00221		1.57253	17	578.477	565.866	0.999487		1.57253	17	594.067	582.565	1.01228		1.57153	17	413.571	400.782	1.00411		1.57153	17	697.757	684.615	0.968514		1.57129	17
1.67037	18	586.464	573.448	0.992111		1.67225	18	977.907	963.815	0.974146		1.67237	18	508.44	497.098	1.00718		1.67137	18	458.718	445.233	1.03313		1.67237	18	570.04	557.429	0.984585		1.67237	18	577.508	566.006	0.983505		1.67137	18	400.907	388.118	0.972385		1.67137	18	709.373	696.231	0.984947		1.67225	18
1.77022	19	582.823	569.807	0.985812		1.7722	19	1010.98	996.89	1.00758		1.77222	19	499.059	487.717	0.988172		1.77122	19	446.301	432.816	1.00431		1.77222	19	570.518	557.907	0.985429		1.77022	19	595.166	583.664	1.01419		1.77122	19	407.646	394.857	0.989269		1.77122	19	722.298	709.156	1.00323		1.7702	19
1.87106	20	591.703	578.687	1.00118		1.87216	20	1004.51	990.415	1.00103		1.87206	20	502.084	490.742	0.994301		1.87106	20	445.865	432.38	1.0033		1.87206	20	579.856	567.245	1.00192		1.87206	20	582.642	571.14	0.992426		1.87307	20	415.872	403.083	1.00988		1.87106	20	711.507	698.365	0.987966		1.87216	20
2.03032	21	387.157	374.141	0.647294		2.02763	21	661.055	646.963	0.653897		2.03132	21	362.189	350.847	0.710857		2.03032	21	294.427	280.942	0.651903		2.03132	21	390.441	377.83	0.66736		2.03132	21	407.344	395.842	0.687824		2.03232	21	272.173	259.384	0.649857		2.03032	21	477.7	464.558	0.657203		2.02763	21
2.11015	22	411.811	398.795	0.689948		2.10557	22	691.293	677.201	0.684459		2.11115	22	398.967	387.625	0.785374		2.11015	22	321.666	308.181	0.715109		2.11115	22	426.835	414.224	0.731642		2.11115	22	451.593	440.091	0.764713		2.11215	22	310.871	298.082	0.74681		2.11015	22	516.064	502.922	0.711476		2.10557	22
2.19999	23	442.376	429.36	0.742827		2.19652	23	754.617	740.525	0.748462		2.19999	23	406.897	395.555	0.801441		2.19899	23	343.249	329.764	0.765191		2.19799	23	451.248	438.637	0.774763		2.19799	23	465.448	453.946	0.788787		2.20199	23	322.924	310.135	0.777008		2.19899	23	554.809	541.667	0.766288		2.19652	23
2.29984	24	456.581	443.565	0.767403		2.29648	24	774.534	760.442	0.768593		2.29984	24	415.683	404.341	0.819242		2.29884	24	359.016	345.531	0.801777		2.29984	24	451.037	438.426	0.77439		2.29984	24	470.443	458.941	0.797467		2.30184	24	330.026	317.237	0.794801		2.29884	24	571.188	558.046	0.789459		2.29648	24
2.39968	25	455.299	442.283	0.765185		2.39644	25	786.992	772.9	0.781184		2.39968	25	429.522	418.18	0.847282		2.39868	25	354.45	340.965	0.791182		2.39968	25	469.566	456.955	0.807118		2.39968	25	499.363	487.861	0.847719		2.40168	25	337.372	324.583	0.813205		2.39868	25	584.4	571.258	0.80815		2.39644	25
2.49953	26	475.921	462.905	0.800863		2.49639	26	806.989	792.897	0.801396		2.50053	26	444.493	433.151	0.877615		2.49853	26	365.489	352.004	0.816797		2.49953	26	477.61	464.999	0.821326		2.50053	26	490.859	479.357	0.832942		2.50253	26	336.681	323.892	0.811474		2.49853	26	585.229	572.087	0.809322		2.49439	26
2.60038	27	475.454	462.438	0.800055		2.59635	27	826.917	812.825	0.821537		2.60038	27	446.377	435.035	0.881432		2.59938	27	364.026	350.541	0.813402		2.60038	27	476.847	464.236	0.819978		2.60038	27	507.087	495.585	0.86114		2.60238	27	337.876	325.087	0.814468		2.59938	27	590.258	577.116	0.816437		2.59635	27
2.70022	28	488.009	474.993	0.821776		2.69631	28	831.699	817.607	0.82637		2.70022	28	450.358	439.016	0.889498		2.69722	28	370.13	356.645	0.827566		2.70022	28	504.025	491.414	0.867983		2.69822	28	508.061	496.559	0.862833		2.70222	28	348.111	335.322	0.840111		2.69922	28	615.311	602.169	0.851879		2.69631	28
2.80007	29	484.291	471.275	0.815344		2.79726	29	831.225	817.133	0.825891		2.79907	29	444.516	433.174	0.877661		2.79907	29	364.513	351.028	0.814532		2.80007	29	493.494	480.883	0.849382		2.80007	29	511.314	499.812	0.868485		2.80207	29	345.434	332.645	0.833404		2.79907	29	623.191	610.049	0.863027		2.79626	29
2.89992	30	475.958	462.942	0.800927		2.89722	30	818.37	804.278	0.812899		2.89992	30	458.845	447.503	0.906694		2.89791	30	380.294	366.809	0.85115		2.89891	30	497.513	484.902	0.85648		2.89992	30	513.178	501.676	0.871724		2.90192	30	367.959	355.17	0.889838		2.89891	30	607.599	594.457	0.840969		2.89622	30
2.99876	31	481.164	468.148	0.809934		2.99718	31	840.301	826.209	0.835065		3.00076	31	461.175	449.833	0.911414		2.99876	31	381.778	368.293	0.854594		2.99976	31	509.504	496.893	0.87766		2.99976	31	525.255	513.753	0.892709		3.00276	31	358.574	345.785	0.866325		2.99876	31	631.043	617.901	0.874135		2.99518	31
3.10061	32	493.005	479.989	0.83042		3.09713	32	851.925	837.833	0.846813		3.10061	32	467.73	456.388	0.924696		3.09761	32	386.769	373.284	0.866175		3.09861	32	504.651	492.04	0.869088		3.10061	32	529.662	518.16	0.900367		3.10261	32	376.489	363.7	0.911209		3.09961	32	645.554	632.412	0.894663		3.09613	32
3.19845	33	478.091	465.075	0.804617		3.19709	33	853.588	839.496	0.848494		3.20046	33	459.062	447.72	0.907133		3.19745	33	385.953	372.468	0.864282		3.20046	33	504.478	491.867	0.868783		3.19845	33	529.615	518.113	0.900285		3.20246	33	370.899	358.11	0.897204		3.19945	33	631.421	618.279	0.87467		3.19709	33
3.3003	34	489.013	475.997	0.823513		3.29705	34	862.122	848.03	0.857119		3.2993	34	470.92	459.578	0.931159		3.2993	34	374.537	361.052	0.837792		3.3003	34	507.359	494.748	0.873871		3.3003	34	512.527	501.025	0.870593		3.3023	34	358.887	346.098	0.867109		3.2993	34	644.277	631.135	0.892857		3.29705	34
3.40015	35	499.722	486.706	0.842041		3.397	35	834.941	820.849	0.829647		3.40015	35	472.56	461.218	0.934482		3.39815	35	403.251	389.766	0.90442		3.39915	35	492.268	479.657	0.847216		3.39915	35	540.522	529.02	0.919238		3.40215	35	369.514	356.725	0.893734		3.39815	35	632.696	619.554	0.876473		3.395	35
3.49899	36	502.382	489.366	0.846643		3.49596	36	846.495	832.403	0.841325		3.50099	36	470.294	458.952	0.929891		3.49899	36	385.614	372.129	0.863495		3.49999	36	494.879	482.268	0.851828		3.49999	36	540.084	528.582	0.918477		3.50099	36	360.678	347.889	0.871596		3.49899	36	630.955	617.813	0.87401		3.49496	36
3.59984	37	514.279	501.263	0.867225		3.59692	37	848.593	834.501	0.843445		3.60084	37	474.008	462.666	0.937416		3.59984	37	393.858	380.373	0.882625		3.59884	37	503.925	491.314	0.867806		3.60084	37	529.104	517.602	0.899397		3.60284	37	368.496	355.707	0.891183		3.59984	37	627.7	614.558	0.869406		3.59692	37
3.70069	38	500.61	487.594	0.843577		3.69687	38	857.705	843.613	0.852655		3.70069	38	479.427	468.085	0.948395		3.69769	38	398.385	384.9	0.893129		3.70069	38	519.535	506.924	0.895378		3.69869	38	533.155	521.653	0.906437		3.70269	38	393.649	380.86	0.954201		3.69769	38	643.167	630.025	0.891286		3.69487	38
3.80053	39	499.261	486.245	0.841243		3.79583	39	869.153	855.061	0.864226		3.79953	39	472.506	461.164	0.934372		3.79753	39	379.121	365.636	0.848429		3.79853	39	515.785	503.174	0.888754		3.79853	39	524.629	513.127	0.891622		3.80253	39	373.158	360.369	0.902863		3.79953	39	650.437	637.295	0.901571		3.79683	39
3.90038	40	502.668	489.652	0.847138		3.89679	40	849.817	835.725	0.844683		3.90038	40	481.618	470.276	0.952834		3.89838	40	410.496	397.011	0.921232		3.89938	40	503.127	490.516	0.866396		3.89938	40	528.524	517.022	0.89839		3.90138	40	365.802	353.013	0.884434		3.89838	40	646.193	633.051	0.895567		3.89579	40
3.99923	41	507.222	494.206	0.855016		3.99574	41	861.282	847.19	0.85627		3.99923	41	494.354	483.012	0.978639		3.99923	41	396.084	382.599	0.88779		4.00023	41	493.426	480.815	0.849262		4.00023	41	553.973	542.471	0.94261		4.00223	41	368.963	356.174	0.892353		3.99923	41	659.626	646.484	0.914571		3.99574	41
4.09907	42	505.258	492.242	0.851618		4.0977	42	861.774	847.682	0.856768		4.10107	42	467.636	456.294	0.924505		4.09807	42	393.986	380.501	0.882922		4.09907	42	513.964	501.353	0.885538		4.09907	42	550.882	539.38	0.937239		4.10307	42	378.595	365.806	0.916485		4.09807	42	641.758	628.616	0.889293		4.0967	42
4.19892	43	496.473	483.457	0.83642		4.19566	43	894.63	880.538	0.889976		4.19892	43	486.467	475.125	0.962659		4.19792	43	388.184	374.699	0.869459		4.19892	43	517.637	505.026	0.892025		4.19892	43	528.295	516.793	0.897992		4.20092	43	356.352	343.563	0.860758		4.19792	43	661.379	648.237	0.917051		4.19566	43
4.30077	44	500.235	487.219	0.842928		4.29561	44	879.503	865.411	0.874687		4.29976	44	463.75	452.408	0.916632		4.29776	44	379.496	366.011	0.849299		4.29876	44	521.616	509.005	0.899054		4.29876	44	558.588	547.086	0.95063		4.30277	44	360.492	347.703	0.87113		4.29776	44	666.679	653.537	0.924549		4.29561	44
4.39861	45	494.65	481.634	0.833266		4.39557	45	870.396	856.304	0.865482		4.40061	45	474.317	462.975	0.938042		4.39861	45	385.152	371.667	0.862423		4.39861	45	532.089	519.478	0.917552		4.39961	45	531.245	519.743	0.903118		4.40161	45	368.742	355.953	0.891799		4.39861	45	657.721	644.579	0.911876		4.39757	45
4.49946	46	519.763	506.747	0.876713		4.49553	46	861.879	847.787	0.856874		4.49946	46	473.805	462.463	0.937004		4.49846	46	385.717	372.232	0.863734		4.49946	46	529.422	516.811	0.912841		4.50046	46	534.172	522.67	0.908204		4.50146	46	360.774	347.985	0.871837		4.49946	46	660.384	647.242	0.915643		4.49553	46
4.6003	47	505.297	492.281	0.851686		4.59548	47	889.612	875.52	0.884904		4.5993	47	473.614	462.272	0.936617		4.5983	47	399.809	386.324	0.896433		4.5993	47	502.915	490.304	0.866022		4.5993	47	546.845	535.343	0.930225		4.60131	47	368.092	355.303	0.890171		4.5983	47	653.806	640.664	0.906337		4.59548	47
4.69915	48	514.306	501.29	0.867272		4.69644	48	888.046	873.954	0.883321		4.69915	48	480.183	468.841	0.949927		4.69815	48	397.03	383.545	0.889985		4.69915	48	532.187	519.576	0.917725		4.69915	48	537.578	526.076	0.914122		4.70115	48	373.497	360.708	0.903713		4.69815	48	654.701	641.559	0.907603		4.69544	48
4.801	49	512.159	499.143	0.863558		4.7964	49	892.39	878.298	0.887712		4.8	49	482.974	471.632	0.955582		4.798	49	413.109	399.624	0.927295		4.799	49	518.792	506.181	0.894066		4.799	49	550.041	538.539	0.935778		4.803	49	365.224	352.435	0.882985		4.798	49	661.016	647.874	0.916537		4.7954	49
4.89884	50	518.607	505.591	0.874713		4.89635	50	894.449	880.357	0.889793		4.90084	50	475.181	463.839	0.939792		4.89884	50	414.586	401.101	0.930722		4.89884	50	518.515	505.904	0.893576		4.89984	50	556.848	545.346	0.947606		4.90184	50	370.119	357.33	0.895249		4.89884	50	668.549	655.407	0.927194		4.89535	50
4.99969	51	501.692	488.676	0.845449		4.99631	51	894.973	880.881	0.890323		4.99969	51	482.501	471.159	0.954623		4.99969	51	406.82	393.335	0.912702		4.99969	51	515.368	502.757	0.888018		4.99969	51	545.247	533.745	0.927448		5.00169	51	363.132	350.343	0.877744		4.99869	51	679.501	666.359	0.942688		4.99531	51
5.09954	52	516.356	503.34	0.870819		5.09627	52	904.485	890.393	0.899937		5.10154	52	478.361	467.019	0.946235		5.09854	52	397.438	383.953	0.890932		5.09954	52	522.75	510.139	0.901057		5.09954	52	539.108	527.606	0.916781		5.10154	52	377.376	364.587	0.913431		5.09854	52	648.713	635.571	0.899132		5.09627	52
5.19938	53	518.463	505.447	0.874464		5.19622	53	881.557	867.465	0.876763		5.19938	53	476.826	465.484	0.943125		5.19838	53	394.999	381.514	0.885272		5.20138	53	522.749	510.138	0.901055		5.19938	53	529.613	518.111	0.900282		5.20138	53	372.449	359.66	0.901087		5.19838	53	664.837	651.695	0.921943		5.19622	53
5.29923	54	507.936	494.92	0.856252		5.29618	54	891.205	877.113	0.886514		5.29923	54	493.174	481.832	0.976248		5.29823	54	403.198	389.713	0.904297		5.29923	54	509.373	496.762	0.877429		5.29923	54	542.377	530.875	0.922461		5.30123	54	371.972	359.183	0.899892		5.29823	54	650.933	637.791	0.902273		5.29618	54
5.39907	55	523.058	510.042	0.882414		5.39614	55	928.419	914.327	0.924127		5.40008	55	478.795	467.453	0.947115		5.39907	55	407.309	393.824	0.913837		5.39907	55	514.785	502.174	0.886988		5.40008	55	547.194	535.692	0.930831		5.40208	55	380.341	367.552	0.920859		5.39907	55	649.018	635.876	0.899564		5.39614	55
5.49992	56	536.459	523.443	0.905599		5.49609	56	899.588	885.496	0.894987		5.49992	56	490.904	479.562	0.971649		5.49892	56	404.502	391.017	0.907323		5.49992	56	509.323	496.712	0.87734		5.49992	56	555.924	544.422	0.946001		5.50192	56	382.811	370.022	0.927048		5.49892	56	663.223	650.081	0.919659		5.49609	56
5.59977	57	512.733	499.717	0.864551		5.59605	57	914.977	900.885	0.910541		5.59977	57	481.264	469.922	0.952117		5.59877	57	405.127	391.642	0.908773		5.59977	57	517.938	505.327	0.892557		5.59977	57	552.412	540.91	0.939898		5.60177	57	364.272	351.483	0.8806		5.59877	57	670.084	656.942	0.929366		5.59605	57
5.69961	58	515.759	502.743	0.869786		5.69601	58	923.398	909.306	0.919052		5.69961	58	476.728	465.386	0.942927		5.69861	58	391.542	378.057	0.877251		5.69961	58	517.998	505.387	0.892663		5.69961	58	553.849	542.347	0.942395		5.70162	58	369.077	356.288	0.892639		5.69861	58	687.469	674.327	0.95396		5.69601	58
5.79946	59	509.884	496.868	0.859622		5.79596	59	922.54	908.448	0.918185		5.79946	59	486.046	474.704	0.961806		5.79846	59	393.774	380.289	0.88243		5.79946	59	506.097	493.486	0.871642		5.79946	59	555.422	543.92	0.945128		5.80146	59	377.017	364.228	0.912531		5.79846	59	659.09	645.948	0.913812		5.79596	59
5.89931	60	508.381	495.365	0.857021		5.89692	60	934.412	920.32	0.930184		5.90031	60	489.286	477.944	0.968371		5.89831	60	405.161	391.676	0.908852		5.89931	60	517.494	504.883	0.891773		5.90031	60	546.4	534.898	0.929451		5.90231	60	366.715	353.926	0.886721		5.89931	60	654.878	641.736	0.907854		5.89592	60
6.00015	61	517.218	504.202	0.87231		5.99688	61	914.079	899.987	0.909633		6.00015	61	483.416	472.074	0.956477		5.99915	61	399.208	385.723	0.895039		6.00015	61	514.374	501.763	0.886262		6.00015	61	557.203	545.701	0.948223		6.00216	61	376.007	363.218	0.910001		5.99915	61	640.529	627.387	0.887555		5.99588	61
6.1	62	510.266	497.25	0.860283		6.09683	62	916.35	902.258	0.911929		6.1	62	480.999	469.657	0.95158		6.099	62	401.008	387.523	0.899216		6.1	62	517.875	505.264	0.892446		6.1	62	543.29	531.788	0.924047		6.102	62	370.945	358.156	0.897319		6.099	62	662.055	648.913	0.918007		6.09583	62
6.19985	63	513.398	500.382	0.865701		6.19679	63	909.753	895.661	0.905261		6.19985	63	485.768	474.426	0.961243		6.19885	63	413.562	400.077	0.928346		6.19985	63	534.675	522.064	0.92212		6.19985	63	558.538	547.036	0.950543		6.20185	63	368.961	356.172	0.892348		6.19885	63	669.744	656.602	0.928885		6.19579	63
6.29969	64	513.867	500.851	0.866513		6.29675	64	915.54	901.448	0.91111		6.29969	64	488.766	477.424	0.967317		6.29869	64	403.796	390.311	0.905685		6.29969	64	501.8	489.189	0.864053		6.29969	64	541.002	529.5	0.920072		6.30169	64	379.84	367.051	0.919604		6.29869	64	653.304	640.162	0.905627		6.29675	64
6.39954	65	509.35	496.334	0.858698		6.3967	65	912.274	898.182	0.907809		6.40054	65	476.981	465.639	0.943439		6.39854	65	402.423	388.938	0.902499		6.39954	65	530.719	518.108	0.915132		6.40054	65	541.106	529.604	0.920252		6.40254	65	375.315	362.526	0.908267		6.39854	65	646.421	633.279	0.89589		6.3967	65
6.50039	66	520.802	507.786	0.878511		6.49666	66	912.378	898.286	0.907914		6.50039	66	477.032	465.69	0.943543		6.49939	66	406.476	392.991	0.911904		6.50039	66	515.765	503.154	0.888719		6.50039	66	550.631	539.129	0.936803		6.50039	66	383.169	370.38	0.927945		6.49939	66	660.964	647.822	0.916464		6.49666	66
6.60023	67	517.812	504.796	0.873338		6.59562	67	938.457	924.365	0.934273		6.60023	67	477.768	466.426	0.945034		6.59923	67	398.344	384.859	0.893034		6.59823	67	525.916	513.305	0.906649		6.60023	67	546.243	534.741	0.929179		6.60223	67	387.723	374.934	0.939354		6.59923	67	655.717	642.575	0.909041		6.59662	67
6.70008	68	508.106	495.09	0.856546		6.69657	68	918.715	904.623	0.914319		6.70008	68	496.113	484.771	0.982203		6.69708	68	398.945	385.46	0.894429		6.70008	68	512.207	499.596	0.882434		6.69808	68	533.889	522.387	0.907712		6.70208	68	378.259	365.47	0.915643		6.69908	68	648.664	635.522	0.899063		6.69457	68
6.79992	69	514.717	501.701	0.867983		6.79553	69	920.812	906.72	0.916439		6.79892	69	492.774	481.432	0.975438		6.79892	69	386.133	372.648	0.864699		6.79992	69	520.582	507.971	0.897227		6.79992	69	549.723	538.221	0.935226		6.80193	69	373.66	360.871	0.904121		6.79892	69	660.256	647.114	0.915462		6.79653	69
6.89977	70	513.748	500.732	0.866307		6.89649	70	904.669	890.577	0.900123		6.90077	70	474.149	462.807	0.937701		6.89777	70	396.283	382.798	0.888252		6.89877	70	519.855	507.244	0.895943		6.89977	70	539.169	527.667	0.916887		6.90277	70	373.625	360.836	0.904033		6.89877	70	685.875	672.733	0.951705		6.89649	70
6.99862	71	499.467	486.451	0.8416		6.99644	71	902.735	888.643	0.898168		7.00062	71	481.272	469.93	0.952133		6.99962	71	396.837	383.352	0.889537		7.00062	71	525.553	512.942	0.906007		7.00062	71	545.975	534.473	0.928713		7.00262	71	368.447	355.658	0.89106		6.99962	71	671.304	658.162	0.931091		6.99544	71
7.10046	72	516.866	503.85	0.871701		7.0974	72	911.349	897.257	0.906874		7.10046	72	501.097	489.755	0.992301		7.09746	72	394.528	381.043	0.884179		7.09846	72	525.462	512.851	0.905847		7.10046	72	536.33	524.828	0.911954		7.10247	72	386.041	373.252	0.93514		7.09946	72	661.396	648.254	0.917075		7.0964	72
7.20031	73	508.005	494.989	0.856371		7.19736	73	907.374	893.282	0.902857		7.20031	73	496.392	485.05	0.982768		7.19731	73	392.155	378.67	0.878673		7.20031	73	524.48	511.869	0.904112		7.19831	73	558.875	547.373	0.951128		7.20231	73	364.342	351.553	0.880776		7.19731	73	665.828	652.686	0.923345		7.19536	73
7.30016	74	524.192	511.176	0.884376		7.29531	74	911.843	897.751	0.907373		7.30016	74	483.337	471.995	0.956317		7.29916	74	395.899	382.414	0.887361		7.30016	74	517.779	505.168	0.892276		7.30016	74	555.522	544.02	0.945302		7.30216	74	372.756	359.967	0.901856		7.29916	74	659.294	646.152	0.914101		7.29631	74
7.399	75	524.266	511.25	0.884504		7.39727	75	903.251	889.159	0.898689		7.401	75	480.265	468.923	0.950093		7.398	75	404.168	390.683	0.906548		7.399	75	508.158	495.547	0.875283		7.399	75	547.253	535.751	0.930934		7.402	75	374.496	361.707	0.906215		7.398	75	682.777	669.635	0.947322		7.39727	75
7.49885	76	523.858	510.842	0.883798		7.49723	76	926.751	912.659	0.922441		7.50085	76	485.648	474.306	0.961		7.49985	76	396.703	383.218	0.889226		7.50085	76	511.896	499.285	0.881885		7.50085	76	544.77	533.268	0.926619		7.50085	76	382.244	369.455	0.925627		7.49985	76	682.065	668.923	0.946315		7.49522	76
7.6007	77	507.307	494.291	0.855163		7.59718	77	901.016	886.924	0.89643		7.6007	77	488.631	477.289	0.967044		7.5997	77	403.934	390.449	0.906005		7.5987	77	521.326	508.715	0.898541		7.6007	77	546.73	535.228	0.930025		7.6027	77	392.447	379.658	0.95119		7.5997	77	686.9	673.758	0.953155		7.59518	77
7.69854	78	516.943	503.927	0.871834		7.69514	78	915.486	901.394	0.911055		7.70054	78	478.847	467.505	0.94722		7.69754	78	395.004	381.519	0.885284		7.70054	78	537.361	524.75	0.926864		7.69854	78	559.065	547.563	0.951458		7.70054	78	386.356	373.567	0.935929		7.69754	78	682.585	669.443	0.94705		7.69714	78
7.80039	79	499.676	486.66	0.841961		7.7961	79	947.367	933.275	0.943278		7.79939	79	487.238	475.896	0.964221		7.79839	79	416.906	403.421	0.936106		7.79939	79	515.972	503.361	0.889085		7.80039	79	545.909	534.407	0.928598		7.80239	79	384.307	371.518	0.930796		7.79839	79	678.943	665.801	0.941898		7.7971	79
7.89923	80	524.335	511.319	0.884623		7.89705	80	918.947	904.855	0.914554		7.90124	80	469.349	458.007	0.927976		7.89823	80	400.956	387.471	0.899095		7.89923	80	521.957	509.346	0.899656		7.89923	80	569.485	557.983	0.969564		7.90224	80	377.55	364.761	0.913867		7.89923	80	670.881	657.739	0.930493		7.89505	80
7.99908	81	512.451	499.435	0.864063		7.99601	81	935.033	920.941	0.930812		7.99908	81	495.566	484.224	0.981095		8.00008	81	411.263	397.778	0.923012		8.00108	81	533.219	520.608	0.919548		8.00108	81	568.434	556.932	0.967738		8.00108	81	377.246	364.457	0.913105		8.00008	81	688.626	675.484	0.955597		7.99501	81
8.10093	82	522.524	509.508	0.88149		8.09697	82	930.258	916.166	0.925986		8.10093	82	487.264	475.922	0.964274		8.09793	82	419.216	405.731	0.941466		8.09893	82	513.915	501.304	0.885451		8.09893	82	562.745	551.243	0.957853		8.10293	82	381.455	368.666	0.92365		8.09993	82	672.881	659.739	0.933322		8.09697	82
8.19877	83	531.781	518.765	0.897505		8.19792	83	923.377	909.285	0.919031		8.19977	83	494.452	483.11	0.978838		8.19777	83	410.056	396.571	0.920211		8.19877	83	519.357	506.746	0.895063		8.19877	83	561.321	549.819	0.955379		8.20078	83	378.152	365.363	0.915375		8.19777	83	653.828	640.686	0.906368		8.19592	83
8.29862	84	521.88	508.864	0.880376		8.29588	84	928.051	913.959	0.923755		8.29962	84	486.682	475.34	0.963095		8.29962	84	413.573	400.088	0.928372		8.29862	84	541.058	528.447	0.933394		8.29962	84	555.79	544.288	0.945768		8.30262	84	378.115	365.326	0.915282		8.29962	84	697.559	684.417	0.968234		8.29588	84
8.39947	85	527.144	514.128	0.889483		8.39784	85	925.566	911.474	0.921244		8.40147	85	496.289	484.947	0.98256		8.39847	85	408.153	394.668	0.915795		8.39947	85	523.948	511.337	0.903173		8.39947	85	545.792	534.29	0.928395		8.40147	85	368.408	355.619	0.890963		8.39847	85	660.683	647.541	0.916066		8.39583	85
8.49931	86	524.396	511.38	0.884729		8.49579	86	909.749	895.657	0.905257		-4187.66	86	496.465	485.123	0.982916		8.49831	86	409.726	396.241	0.919445		8.49931	86	529.845	517.234	0.913588		8.49931	86	556.137	544.635	0.946371		8.50131	86	371.368	358.579	0.898379		8.50031	86	675.353	662.211	0.936819		8.49579	86
8.60116	87	512.983	499.967	0.864983		8.59775	87	933.244	919.152	0.929004		8.60116	87	484.106	472.764	0.957875		8.59816	87	406.118	392.633	0.911073		8.59916	87	527.217	514.606	0.908947		8.59916	87	544.212	532.71	0.92565		8.60116	87	378.333	365.544	0.915829		8.59816	87	689.367	676.225	0.956645		8.59575	87
8.69901	88	514.334	501.318	0.867321		8.6957	88	930.973	916.881	0.926708		8.70001	88	485.557	474.215	0.960815		8.69801	88	399.843	386.358	0.896512		8.69901	88	510.225	497.614	0.878934		8.69901	88	544.005	532.503	0.92529		8.70101	88	366.237	353.448	0.885523		8.69801	88	685.61	672.468	0.95133		8.6957	88
8.79885	89	510.461	497.445	0.86062		8.79566	89	944.188	930.096	0.940065		8.79985	89	505.636	494.294	1.0015		8.79885	89	409.552	396.067	0.919041		8.79885	89	540.548	527.937	0.932493		8.79985	89	543.3	531.798	0.924065		8.80185	89	386.415	373.626	0.936077		8.79885	89	678.885	665.743	0.941816		8.79566	89
8.8997	90	513.563	500.547	0.865987		8.89562	90	921.216	907.124	0.916847		8.8997	90	490.431	479.089	0.970691		8.8987	90	391.355	377.87	0.876817		8.8997	90	531.384	518.773	0.916307		8.8997	90	552.794	541.292	0.940562		8.9017	90	374.051	361.262	0.905101		8.8987	90	682.399	669.257	0.946787		8.89562	90
8.99955	91	511.098	498.082	0.861722		8.99658	91	926.919	912.827	0.922611		8.99955	91	489.138	477.796	0.968071		8.99854	91	413.133	399.648	0.927351		8.99955	91	533.672	521.061	0.920348		8.99955	91	560.937	549.435	0.954711		9.00155	91	402.745	389.956	0.97699		8.99854	91	671.978	658.836	0.932045		8.99557	91
9.09939	92	519.932	506.916	0.877006		9.09653	92	919.318	905.226	0.914929		9.09939	92	491.352	480.01	0.972557		9.09839	92	402.692	389.207	0.903123		9.09939	92	543.472	530.861	0.937658		9.09939	92	550.51	539.008	0.936593		9.10139	92	385.862	373.073	0.934692		9.09839	92	685.868	672.726	0.951695		9.09753	92
9.19924	93	523.394	510.378	0.882995		9.19649	93	939.458	925.366	0.935284		9.19924	93	497.599	486.257	0.985214		9.19824	93	416.129	402.644	0.934303		9.19924	93	533.653	521.042	0.920314		9.19924	93	552.355	540.853	0.939799		9.20124	93	382.714	369.925	0.926805		9.19824	93	658.784	645.642	0.91338		9.19549	93
9.29908	94	503.685	490.669	0.848897		9.29644	94	923.957	909.865	0.919617		9.30008	94	480.854	469.512	0.951286		9.29908	94	411.001	397.516	0.922404		9.29908	94	517.304	504.693	0.891437		9.30008	94	565.187	553.685	0.962096		9.30209	94	387.232	374.443	0.938124		9.29908	94	657.29	644.148	0.911266		9.29644	94
9.39993	95	516.335	503.319	0.870783		9.3964	95	928.254	914.162	0.92396		9.39993	95	477.33	465.988	0.944146		9.39893	95	406.072	392.587	0.910966		9.39993	95	511.791	499.18	0.8817		9.39993	95	550.381	538.879	0.936369		9.40193	95	371.035	358.246	0.897544		9.39893	95	645.382	632.24	0.89442		9.3964	95
9.49978	96	519.268	506.252	0.875857		9.49636	96	935.82	921.728	0.931607		9.49978	96	496.548	485.206	0.983084		9.49878	96	412.7	399.215	0.926346		9.49978	96	547.372	534.761	0.944546		9.49978	96	557.244	545.742	0.948294		9.50178	96	398.239	385.45	0.965701		9.49878	96	668.737	655.595	0.92746		9.49636	96
9.59962	97	505.706	492.69	0.852393		9.59631	97	944.326	930.234	0.940205		9.59962	97	481.444	470.102	0.952482		9.59862	97	409.766	396.281	0.919538		9.59962	97	534.53	521.919	0.921863		9.59962	97	549.794	538.292	0.935349		9.60163	97	402.848	390.059	0.977248		9.59862	97	668.122	654.98	0.92659		9.59631	97
9.69947	98	524.144	511.128	0.884293		9.69627	98	958.282	944.19	0.95431		9.69947	98	479.242	467.9	0.94802		9.69847	98	412.152	398.667	0.925074		9.69947	98	512.945	500.334	0.883738		9.69947	98	555.729	544.227	0.945662		9.70147	98	383.64	370.851	0.929125		9.69847	98	675.775	662.633	0.937416		9.69627	98
9.79932	99	516.021	503.005	0.870239		9.79623	99	934.044	919.952	0.929812		9.80032	99	487.19	475.848	0.964124		9.79932	99	420.417	406.932	0.944253		9.79932	99	534.154	521.543	0.921199		9.80032	99	553.027	541.525	0.940967		9.80232	99	385.191	372.402	0.933011		9.79932	99	652.332	639.19	0.904252		9.79623	99
9.90016	100	521.861	508.845	0.880343		9.89618	100	947.365	933.273	0.943276		9.90016	100	482.376	471.034	0.95437		9.89916	100	408.166	394.681	0.915825		9.90016	100	537.108	524.497	0.926417		9.90016	100	561.945	550.443	0.956463		9.90216	100	381.084	368.295	0.922721		9.89916	100	669.119	655.977	0.928		9.89618	100
10	101	518.256	505.24	0.874106		9.99614	101	927.987	913.895	0.92369		10	101	476.58	465.238	0.942627		9.99901	101	407.285	393.8	0.913781		10	101	533.555	520.944	0.920141		10	101	558.49	546.988	0.950459		10.002	101	388.599	375.81	0.941549		9.99901	101	674.8	661.658	0.936037		9.99614	101
10.0999	102	506.656	493.64	0.854037		10.0971	102	936.966	922.874	0.932766		10.0999	102	490.623	479.281	0.97108		10.0989	102	408.77	395.285	0.917227		10.0999	102	521.665	509.054	0.89914		10.0999	102	553.433	541.931	0.941672		10.1019	102	378.418	365.629	0.916042		10.0989	102	673.5	660.358	0.934198		10.0961	102
10.1997	103	523.83	510.814	0.883749		10.1971	103	944.74	930.648	0.940623		10.1997	103	485.594	474.252	0.96089		10.1987	103	415.83	402.345	0.933609		10.1997	103	537.701	525.09	0.927464		10.1997	103	533.399	521.897	0.906861		10.2017	103	379.393	366.604	0.918484		10.1987	103	673.83	660.688	0.934665		10.1961	103
10.2995	104	522.884	509.868	0.882113		10.297	104	927.304	913.212	0.923		10.3005	104	488.371	477.029	0.966517		10.2985	104	402.296	388.811	0.902204		10.2995	104	518.645	506.034	0.893806		10.3005	104	541.462	529.96	0.920871		10.3026	104	376.272	363.483	0.910665		10.2985	104	676.703	663.561	0.938729		10.296	104
10.4004	105	513.981	500.965	0.86671		10.397	105	938.131	924.039	0.933943		10.4004	105	484.106	472.764	0.957875		10.3994	105	403.14	389.655	0.904163		10.4004	105	520.099	507.488	0.896374		10.4004	105	538.288	526.786	0.915356		10.4024	105	385.703	372.914	0.934293		10.3994	105	680.213	667.071	0.943695		10.396	105
10.4982	106	518.223	505.207	0.874049		10.4969	106	952.001	937.909	0.947962		10.5002	106	487.976	476.634	0.965716		10.4992	106	411.959	398.474	0.924627		10.5002	106	524.315	511.704	0.903821		10.5002	106	561.821	550.319	0.956247		10.5002	106	389.66	376.871	0.944207		10.4992	106	679.198	666.056	0.942259		10.4949	106
10.6001	107	525.257	512.241	0.886218		10.5969	107	964.771	950.679	0.960869		10.6001	107	487.907	476.565	0.965577		10.5991	107	411.968	398.483	0.924647		10.5981	107	530.302	517.691	0.914396		10.6001	107	553.431	541.929	0.941669		10.6021	107	384.809	372.02	0.932053		10.5991	107	658.186	645.044	0.912534		10.5969	107
10.6999	108	527.125	514.109	0.88945		10.6968	108	942.218	928.126	0.938074		10.6999	108	477.605	466.263	0.944704		10.6979	108	404.399	390.914	0.907084		10.6999	108	519.557	506.946	0.895417		10.6989	108	552.006	540.504	0.939193		10.7019	108	381.307	368.518	0.92328		10.6979	108	655.141	641.999	0.908226		10.6968	108
10.7998	109	527.967	514.951	0.890907		10.7948	109	960.384	946.292	0.956435		10.8008	109	483.951	472.609	0.957561		10.7988	109	408.988	395.503	0.917733		10.7998	109	535.195	522.584	0.923038		10.8008	109	546.822	535.32	0.930185		10.8028	109	385.912	373.123	0.934817		10.7988	109	676.093	662.951	0.937866		10.7968	109
10.9006	110	524.905	511.889	0.885609		10.8968	110	929.774	915.682	0.925497		10.9006	110	479.485	468.143	0.948513		10.8976	110	409.688	396.203	0.919357		10.8986	110	520.098	507.487	0.896372		10.9006	110	538.021	526.519	0.914892		10.9026	110	379.124	366.335	0.91781		10.8996	110	703.711	690.569	0.976937		10.8968	110
10.9985	111	521.437	508.421	0.879609		10.9967	111	925.62	911.528	0.921298		10.9985	111	487.655	476.313	0.965066		10.9995	111	395.955	382.47	0.887491		11.0005	111	514.146	501.535	0.885859		11.0005	111	550.668	539.166	0.936868		11.0005	111	372.967	360.178	0.902385		10.9995	111	672.53	659.388	0.932826		10.9947	111
11.1003	112	515.488	502.472	0.869317		11.0967	112	926.939	912.847	0.922631		11.1003	112	487.822	476.48	0.965404		11.0973	112	402.708	389.223	0.90316		11.1003	112	535.949	523.338	0.92437		11.1003	112	552.901	541.399	0.940748		11.1023	112	375.566	362.777	0.908896		11.0993	112	659.344	646.202	0.914172		11.0967	112
11.1982	113	511.821	498.805	0.862973		11.1966	113	925.825	911.733	0.921505		11.2002	113	487.219	475.877	0.964183		11.1982	113	392.579	379.094	0.879657		11.2002	113	545.688	533.077	0.941572		11.1992	113	563.151	551.649	0.958558		11.2012	113	380.86	368.071	0.92216		11.1982	113	669.117	655.975	0.927998		11.1956	113
11.3	114	508.807	495.791	0.857758		11.2956	114	940.241	926.149	0.936076		11.299	114	479.153	467.811	0.94784		11.298	114	409.039	395.554	0.917851		11.299	114	541.32	528.709	0.933857		11.3	114	542.336	530.834	0.92239		11.302	114	370.409	357.62	0.895976		11.299	114	663.144	650.002	0.919548		11.2966	114
11.3999	115	512.846	499.83	0.864746		11.3975	115	892.588	878.496	0.887912		11.4009	115	496.433	485.091	0.982851		11.3979	115	399.247	385.762	0.895129		11.3989	115	549.937	537.326	0.949077		11.3989	115	562.348	550.846	0.957163		11.4029	115	367.177	354.388	0.887878		11.3999	115	668.768	655.626	0.927504		11.3955	115
11.4987	116	513.861	500.845	0.866502		11.4975	116	916.741	902.649	0.912324		11.4987	116	498.136	486.794	0.986302		11.4997	116	403.788	390.303	0.905666		11.5007	116	548.886	536.275	0.94722		11.5007	116	555.078	543.576	0.944531		11.5007	116	374.185	361.396	0.905436		11.4997	116	681.119	667.977	0.944977		11.4955	116
11.5986	117	513.181	500.165	0.865326		11.5974	117	928.896	914.804	0.924609		11.6006	117	490.257	478.915	0.970338		11.5976	117	412.545	399.06	0.925986		11.5986	117	529.577	516.966	0.913115		11.5986	117	548.204	536.702	0.932586		11.6026	117	372.65	359.861	0.90159		11.5996	117	677.821	664.679	0.940311		11.5954	117
11.7004	118	522.783	509.767	0.881938		11.6954	118	928.182	914.09	0.923888		11.6994	118	485.323	473.981	0.960341		11.6984	118	412.083	398.598	0.924914		11.7004	118	543.105	530.494	0.937009		11.6994	118	553.207	541.705	0.941279		11.7024	118	368.228	355.439	0.890512		11.6984	118	648.88	635.738	0.899369		11.6954	118
11.8002	119	510.331	497.315	0.860395		11.7954	119	911.059	896.967	0.906581		11.7992	119	480.013	468.671	0.949582		11.7992	119	405.858	392.373	0.91047		11.7992	119	524.007	511.396	0.903277		11.7992	119	553.331	541.829	0.941495		11.8022	119	379.248	366.459	0.918121		11.7992	119	668.689	655.547	0.927392		11.7974	119
11.8991	120	512.164	499.148	0.863566		11.8953	120	925.669	911.577	0.921348		11.8991	120	513.552	502.21	1.01754		11.8981	120	401.352	387.867	0.900014		11.8991	120	534.915	522.304	0.922544		11.8991	120	542.567	531.065	0.922791		11.9011	120	393.733	380.944	0.954412		11.8981	120	665.759	652.617	0.923247		11.8953	120
11.9989	121	520.266	507.25	0.877583		11.9963	121	933.803	919.711	0.929569		11.9989	121	495.646	484.304	0.981257		11.9999	121	409.714	396.229	0.919417		11.9989	121	534.002	521.391	0.920931		11.9989	121	560.748	549.246	0.954383		12.0009	121	374.056	361.267	0.905113		11.9999	121	660.142	647	0.915301		11.9953	121
12.0988	122	536.495	523.479	0.905661		12.0972	122	940.559	926.467	0.936397		12.1008	122	484.614	473.272	0.958905		12.0978	122	407.914	394.429	0.91524		12.0988	122	521.496	508.885	0.898842		12.0988	122	546.689	535.187	0.929954		12.1008	122	373.548	360.759	0.90384		12.0998	122	670.597	657.455	0.930091		12.0952	122
12.1986	123	523.693	510.677	0.883512		12.1962	123	953.958	939.866	0.94994		12.1996	123	493.881	482.539	0.977681		12.1986	123	410.72	397.235	0.921752		12.2006	123	541.85	529.239	0.934793		12.1996	123	559.328	547.826	0.951915		12.2016	123	382.269	369.48	0.92569		12.1986	123	668.657	655.515	0.927347		12.1952	123
12.3005	124	517.281	504.265	0.872419		12.2961	124	931.333	917.241	0.927072		12.2995	124	479.385	468.043	0.94831		12.2985	124	404.811	391.326	0.90804		12.2995	124	524.826	512.215	0.904723		12.2995	124	556.146	544.644	0.946386		12.3025	124	372.461	359.672	0.901117		12.2985	124	686.644	673.502	0.952793		12.2971	124
12.3993	125	514.016	501	0.86677		12.3971	125	910.525	896.433	0.906041		12.3993	125	502.23	490.888	0.994597		12.3983	125	410.032	396.547	0.920155		12.3993	125	535.738	523.127	0.923997		12.3993	125	571.888	560.386	0.97374		12.4033	125	374.054	361.265	0.905108		12.3983	125	680.906	667.764	0.944675		12.3961	125
12.4992	126	520.152	507.136	0.877386		12.4961	126	919.077	904.985	0.914685		12.4992	126	487.125	475.783	0.963992		12.4982	126	414.543	401.058	0.930622		12.4992	126	516.7	504.089	0.89037		12.4992	126	555.857	544.355	0.945884		12.5012	126	378.034	365.245	0.915079		12.5002	126	672.086	658.944	0.932198		12.4961	126
12.599	127	511.017	498.001	0.861582		12.598	127	933.226	919.134	0.928986		12.6	127	490.868	479.526	0.971576		12.598	127	403.815	390.33	0.905729		12.599	127	528.267	515.656	0.910801		12.599	127	553.402	541.9	0.941618		12.601	127	379.673	366.884	0.919186		12.598	127	674.43	661.288	0.935514		12.596	127
12.6989	128	498.952	485.936	0.840709		12.696	128	935.127	921.035	0.930907		12.6999	128	494.358	483.016	0.978647		12.6989	128	418.649	405.164	0.94015		12.6989	128	532.218	519.607	0.91778		12.6999	128	569.005	557.503	0.96873		12.7019	128	370.855	358.066	0.897093		12.6989	128	689.927	676.785	0.957437		12.696	128
12.7997	129	510.387	497.371	0.860492		12.7959	129	908.4	894.308	0.903894		12.7997	129	496.99	485.648	0.98398		12.7987	129	419.394	405.909	0.941879		12.7997	129	540.437	527.826	0.932297		12.7997	129	566.596	555.094	0.964544		12.8027	129	372.504	359.715	0.901225		12.7997	129	683.507	670.365	0.948355		12.7959	129
12.8996	130	501.47	488.454	0.845065		12.8959	130	922.662	908.57	0.918308		12.8996	130	506.94	495.598	1.00414		12.8986	130	413.68	400.195	0.92862		12.8996	130	534.639	522.028	0.922056		12.8996	130	560.232	548.73	0.953486		12.9016	130	372.429	359.64	0.901037		12.8986	130	669.033	655.891	0.927879		12.8959	130
12.9994	131	507.659	494.643	0.855772		12.9958	131	939.349	925.257	0.935174		12.9994	131	502.396	491.054	0.994933		12.9984	131	399.143	385.658	0.894888		12.9994	131	532.798	520.187	0.918804		12.9994	131	561.581	550.079	0.95583		13.0014	131	397.489	384.7	0.963822		12.9984	131	671.535	658.393	0.931418		12.9958	131
13.0992	132	521.143	508.127	0.879101		13.0958	132	943.589	929.497	0.93946		13.0992	132	509.427	498.085	1.00918		13.0982	132	406.473	392.988	0.911897		13.0992	132	532.743	520.132	0.918707		13.0992	132	568.404	556.902	0.967686		13.1012	132	374.824	362.035	0.907037		13.0982	132	680.727	667.585	0.944422		13.0958	132
13.1991	133	521.005	507.989	0.878862		13.1968	133	920.703	906.611	0.916328		13.2001	133	487.79	476.448	0.96534		13.1991	133	410.275	396.79	0.920719		13.1991	133	534.328	521.717	0.921507		13.2001	133	565.463	553.961	0.962576		13.2021	133	376.103	363.314	0.910242		13.1991	133	682.609	669.467	0.947084		13.1958	133
13.2999	134	521.665	508.649	0.880004		13.2967	134	943.807	929.715	0.93968		13.2999	134	484.476	473.134	0.958625		13.2989	134	407.636	394.151	0.914595		13.2999	134	509.552	496.941	0.877745		13.2999	134	549.015	537.513	0.933995		13.3019	134	383.742	370.953	0.92938		13.2989	134	682.858	669.716	0.947437		13.2957	134
13.3998	135	503.13	490.114	0.847937		13.3967	135	940.364	926.272	0.9362		13.3998	135	491.157	479.815	0.972162		13.3988	135	412.239	398.754	0.925276		13.3998	135	519.414	506.803	0.895164		13.3998	135	555.686	544.184	0.945587		13.4018	135	373.081	360.292	0.90267		13.3988	135	675.988	662.846	0.937718		13.3957	135
13.4996	136	512.55	499.534	0.864234		13.4966	136	947.616	933.524	0.94353		13.4996	136	482.239	470.897	0.954093		13.4986	136	412.052	398.567	0.924842		13.4996	136	524.258	511.647	0.90372		13.4996	136	553.046	541.544	0.941		13.5016	136	377.259	364.47	0.913138		13.4986	136	663.28	650.138	0.91974		13.4956	136
13.5995	137	502.819	489.803	0.847399		13.5966	137	950.195	936.103	0.946136		13.6015	137	477.615	466.273	0.944724		13.5985	137	404.907	391.422	0.908263		13.5995	137	531.863	519.252	0.917153		13.5995	137	566.595	555.093	0.964543		13.6015	137	371.557	358.768	0.898852		13.5985	137	679.089	665.947	0.942105		13.5966	137
13.6993	138	528.673	515.657	0.892128		13.6965	138	933.258	919.166	0.929018		13.7003	138	478.752	467.41	0.947028		13.6973	138	428.701	415.216	0.963475		13.6993	138	516.403	503.792	0.889846		13.6983	138	564.314	552.812	0.960579		13.7023	138	377.716	364.927	0.914283		13.6993	138	668.629	655.487	0.927307		13.6965	138
13.8002	139	516.887	503.871	0.871738		13.7965	139	927.269	913.177	0.922965		13.8002	139	495.28	483.938	0.980515		13.7992	139	418.031	404.546	0.938716		13.8002	139	539.661	527.05	0.930926		13.8002	139	572.446	560.944	0.97471		13.8022	139	380.711	367.922	0.921786		13.7992	139	681.627	668.485	0.945695		13.7965	139
13.9	140	514.106	501.09	0.866926		13.8965	140	939.082	924.99	0.934904		13.9	140	494.659	483.317	0.979257		13.899	140	405.476	391.991	0.909583		13.898	140	524.181	511.57	0.903584		13.9	140	546.858	535.356	0.930247		13.902	140	377.374	364.585	0.913426		13.899	140	691.645	678.503	0.959868		13.8965	140
13.9999	141	505.698	492.682	0.85238		13.9964	141	923.272	909.18	0.918925		13.9999	141	489.238	477.896	0.968273		13.9989	141	402.738	389.253	0.90323		13.9999	141	534.619	522.008	0.922021		13.9999	141	551.774	540.272	0.938789		14.0019	141	386.909	374.12	0.937315		13.9989	141	678.721	665.579	0.941584		13.9964	141
14.0997	142	500.872	487.856	0.84403		14.0964	142	942.096	928.004	0.937951		14.0997	142	494.258	482.916	0.978445		14.0987	142	418.862	405.377	0.940644		14.0997	142	544.966	532.355	0.940297		14.0997	142	545.986	534.484	0.928732		14.1017	142	388.502	375.713	0.941306		14.0987	142	668.562	655.42	0.927212		14.0964	142
14.1996	143	507.809	494.793	0.856032		14.1963	143	926.294	912.202	0.921979		14.2006	143	498.808	487.466	0.987663		14.1986	143	416.751	403.266	0.935746		14.1996	143	540.837	528.226	0.933004		14.2006	143	558.466	546.964	0.950418		14.2026	143	376.12	363.331	0.910284		14.1986	143	663.242	650.1	0.919686		14.1963	143
14.2984	144	506.538	493.522	0.853833		14.2963	144	952.859	938.767	0.948829		14.3004	144	502.213	490.871	0.994562		14.2994	144	415.925	402.44	0.933829		14.3004	144	544.583	531.972	0.93962		14.3004	144	558.339	546.837	0.950197		14.3024	144	376.047	363.258	0.910101		14.2994	144	680.331	667.189	0.943862		14.2963	144
14.4003	145	500.29	487.274	0.843023		14.3972	145	949.234	935.142	0.945165		14.4003	145	487.208	475.866	0.96416		14.3993	145	399.616	386.131	0.895986		14.4003	145	518.126	505.515	0.892889		14.3983	145	549.157	537.655	0.934242		14.4023	145	390.94	378.151	0.947414		14.3993	145	681.112	667.97	0.944967		14.3962	145
14.4981	146	496.825	483.809	0.837029		14.4972	146	968.566	954.474	0.964704		14.5001	146	482.02	470.678	0.953649		14.4991	146	399.1	385.615	0.894788		14.5001	146	543.128	530.517	0.93705		14.5001	146	546.607	535.105	0.929811		14.5021	146	380.999	368.21	0.922508		14.4991	146	674.928	661.786	0.936218		14.4962	146
14.5999	147	511.195	498.179	0.86189		14.5971	147	937.389	923.297	0.933193		14.5989	147	493.746	482.404	0.977407		14.5989	147	416.206	402.721	0.934481		14.5989	147	539.712	527.101	0.931016		14.5999	147	547.78	536.278	0.931849		14.6019	147	380.826	368.037	0.922074		14.5989	147	694.686	681.544	0.96417		14.5961	147
14.6988	148	511.753	498.737	0.862855		14.6971	148	941.812	927.72	0.937664		14.7008	148	497.03	485.688	0.984061		14.6978	148	392.686	379.201	0.879905		14.6998	148	535.422	522.811	0.923439		14.6988	148	539.046	527.544	0.916673		14.7028	148	384.422	371.633	0.931084		14.6978	148	672.565	659.423	0.932875		14.6951	148
14.8006	149	498.133	485.117	0.839292		14.7971	149	936.543	922.451	0.932338		14.7986	149	492.049	480.707	0.973969		14.7996	149	397.092	383.607	0.890129		14.8006	149	535.039	522.428	0.922763		14.8006	149	563.383	551.881	0.958961		14.8026	149	382.072	369.283	0.925196		14.7996	149	691.039	677.897	0.95901		14.7971	149
14.9005	150	506.844	493.828	0.854362		14.897	150	922.444	908.352	0.918088		14.9005	150	494.339	482.997	0.978609		14.8995	150	394.744	381.259	0.884681		14.8985	150	518.405	505.794	0.893382		14.8985	150	561.832	550.33	0.956266		14.9025	150	389.738	376.949	0.944402		14.8975	150	671.183	658.041	0.93092		14.895	150
14.9983	151	515.296	502.28	0.868985		14.995	151	922.744	908.652	0.918391		15.0003	151	482.364	471.022	0.954346		14.9993	151	400.87	387.385	0.898895		15.0003	151	536.443	523.832	0.925242		15.0003	151	552.833	541.331	0.94063		15.0003	151	384.249	371.46	0.93065		14.9993	151	665.125	651.983	0.92235		14.995	151
15.1002	152	502.736	489.72	0.847255		15.0969	152	937.729	923.637	0.933537		15.1002	152	479.491	468.149	0.948525		15.0982	152	410.699	397.214	0.921703		15.1002	152	515.934	503.323	0.889017		15.1002	152	548.19	536.688	0.932562		15.1022	152	379.244	366.455	0.918111		15.0992	152	670.304	657.162	0.929677		15.0969	152
15.199	153	495.949	482.933	0.835513		15.1969	153	945.999	931.907	0.941896		15.201	153	483.767	472.425	0.957189		15.198	153	414.07	400.585	0.929525		15.2	153	532.581	519.97	0.918421		15.199	153	534.672	523.17	0.909073		15.202	153	378.843	366.054	0.917106		15.199	153	666.974	653.832	0.924966		15.1969	153
15.2999	154	501.879	488.863	0.845772		15.2958	154	926.261	912.169	0.921946		15.2989	154	471.665	460.323	0.932668		15.2979	154	415.45	401.965	0.932727		15.2989	154	554.193	541.582	0.956594		15.2989	154	554.26	542.758	0.943109		15.3029	154	377.595	364.806	0.91398		15.2999	154	654.965	641.823	0.907977		15.2968	154
15.4007	155	499.917	486.901	0.842378		15.3968	155	905.457	891.365	0.900919		15.4007	155	494.992	483.65	0.979932		15.3977	155	401.011	387.526	0.899223		15.3987	155	535.673	523.062	0.923882		15.3987	155	558.378	546.876	0.950265		15.4027	155	391.408	378.619	0.948586		15.3977	155	669.277	656.135	0.928224		15.3948	155
15.4986	156	505.664	492.648	0.852321		15.4958	156	921.108	907.016	0.916738		15.4996	156	485.739	474.397	0.961184		15.4996	156	404.525	391.04	0.907377		15.5006	156	561.425	548.814	0.969368		15.5006	156	578.611	567.109	0.985422		15.5006	156	370.362	357.573	0.895858		15.4996	156	669.56	656.418	0.928624		15.4958	156
15.5984	157	499.536	486.52	0.841719		15.5977	157	924.235	910.143	0.919898		15.6004	157	479.148	467.806	0.94783		15.5984	157	417.417	403.932	0.937291		15.5994	157	543.247	530.636	0.93726		15.5994	157	562.358	550.856	0.95718		15.6024	157	380.835	368.046	0.922097		15.5994	157	691.127	677.985	0.959135		15.5957	157
15.6993	158	502.092	489.076	0.846141		15.6957	158	915.135	901.043	0.910701		15.6993	158	492.217	480.875	0.974309		15.6983	158	416.309	402.824	0.93472		15.6993	158	534.418	521.807	0.921666		15.6993	158	579.028	567.526	0.986147		15.7013	158	389.421	376.632	0.943608		15.6983	158	682.18	669.038	0.946478		15.6957	158
15.8001	159	527.883	514.867	0.890761		15.7956	159	890.507	876.415	0.885809		15.7991	159	486.483	475.141	0.962691		15.8001	159	407.567	394.082	0.914435		15.8011	159	542.563	529.952	0.936052		15.8011	159	568.907	557.405	0.96856		15.8031	159	367.326	354.537	0.888252		15.7981	159	683.307	670.165	0.948072		15.7966	159
15.8989	160	505.38	492.364	0.851829		15.8976	160	922.574	908.482	0.918219		15.9009	160	488.875	477.533	0.967538		15.8979	160	409.174	395.689	0.918164		15.8989	160	541.662	529.051	0.934461		15.8989	160	579.076	567.574	0.98623		15.9029	160	378.527	365.738	0.916315		15.8979	160	680.446	667.304	0.944024		15.8956	160
15.9988	161	496.107	483.091	0.835786		15.9975	161	925.372	911.28	0.921047		15.9998	161	488.79	477.448	0.967366		15.9978	161	421.67	408.185	0.94716		15.9988	161	535.364	522.753	0.923337		15.9988	161	569.281	557.779	0.96921		16.0008	161	379.61	366.821	0.919028		15.9998	161	684.072	670.93	0.949154		15.9955	161
16.0986	162	500.393	487.377	0.843202		16.0955	162	906.251	892.159	0.901721		16.1006	162	514.402	503.06	1.01926		16.0986	162	415.955	402.47	0.933899		16.0986	162	528.869	516.258	0.911864		16.0996	162	572.42	560.918	0.974664		16.1026	162	384.718	371.929	0.931825		16.0996	162	704.12	690.978	0.977516		16.0955	162
16.1995	163	493.733	480.717	0.831679		16.1955	163	908.437	894.345	0.903931		16.1995	163	487.867	476.525	0.965496		16.1985	163	405.57	392.085	0.909801		16.1995	163	532.44	519.829	0.918172		16.1995	163	568.314	556.812	0.96753		16.2015	163	363.728	350.939	0.879237		16.1985	163	705.485	692.343	0.979447		16.1955	163
16.3003	164	517.072	504.056	0.872058		16.2964	164	917.595	903.503	0.913187		16.2993	164	488.849	477.507	0.967485		16.2983	164	414.661	401.176	0.930896		16.2993	164	531.387	518.776	0.916312		16.2993	164	544.369	532.867	0.925922		16.3013	164	377.269	364.48	0.913163		16.2983	164	705.703	692.561	0.979755		16.2974	164
16.3992	165	508.003	494.987	0.856367		16.3974	165	896.535	882.443	0.891901		16.3992	165	492.115	480.773	0.974103		16.3982	165	413.524	400.039	0.928258		16.3992	165	544.736	532.125	0.93989		16.3992	165	549.912	538.41	0.935554		16.4012	165	379.23	366.441	0.918076		16.3982	165	695.167	682.025	0.96485		16.3954	165
16.499	166	494.253	481.237	0.832579		16.4963	166	909.109	895.017	0.90461		16.5	166	494.81	483.468	0.979563		16.498	166	415.552	402.067	0.932964		16.499	166	546.378	533.767	0.942791		16.499	166	545.332	533.83	0.927596		16.501	166	383.98	371.191	0.929976		16.5	166	700.438	687.296	0.972307		16.4953	166
16.5989	167	523.836	510.82	0.88376		16.5963	167	910.184	896.092	0.905697		16.5999	167	505.478	494.136	1.00118		16.5989	167	410.353	396.868	0.9209		16.5989	167	529.187	516.576	0.912426		16.5999	167	562.636	551.134	0.957663		16.6029	167	383.488	370.699	0.928744		16.5989	167	705.202	692.06	0.979046		16.5953	167
16.6997	168	523.187	510.171	0.882637		16.6962	168	910.785	896.693	0.906304		16.6997	168	482.757	471.415	0.955142		16.6987	168	409.9	396.415	0.919849		16.6997	168	530.599	517.988	0.91492		16.6997	168	562.384	550.882	0.957226		16.7017	168	373.625	360.836	0.904033		16.6987	168	690.321	677.179	0.957994		16.6962	168
16.7996	169	519.292	506.276	0.875898		16.7962	169	900.883	886.791	0.896296		16.7996	169	491.932	480.59	0.973732		16.7986	169	417.401	403.916	0.937254		16.7996	169	519.285	506.674	0.894936		16.7996	169	556.579	545.077	0.947139		16.8036	169	384.726	371.937	0.931846		16.8006	169	710.34	697.198	0.986315		16.7962	169
16.8994	170	502.364	489.348	0.846612		16.8961	170	896.342	882.25	0.891706		16.8994	170	479.891	468.549	0.949335		16.8984	170	414.099	400.614	0.929592		16.8994	170	523.215	510.604	0.901878		16.8994	170	556.263	544.761	0.94659		16.9014	170	376.916	364.127	0.912278		16.8984	170	695.193	682.051	0.964887		16.8961	170
16.9993	171	509.548	496.532	0.85904		16.9961	171	920.9	906.808	0.916527		16.9993	171	483.978	472.636	0.957616		16.9983	171	404.446	390.961	0.907193		16.9993	171	523.747	511.136	0.902818		16.9993	171	566.817	555.315	0.964928		17.0013	171	395.198	382.409	0.958082		16.9983	171	672.376	659.234	0.932608		16.9961	171
17.0991	172	507.702	494.686	0.855847		17.0961	172	928.416	914.324	0.924124		17.1001	172	491.616	480.274	0.973092		17.0991	172	415.43	401.945	0.932681		17.0991	172	534.257	521.646	0.921381		17.1001	172	558.721	547.219	0.950861		17.1021	172	371.055	358.266	0.897594		17.0991	172	678.124	664.982	0.94074		17.0961	172
17.2	173	505.011	491.995	0.851191		17.196	173	909.458	895.366	0.904963		17.2	173	491.598	480.256	0.973055		17.1989	173	409.056	395.571	0.91789		17.2	173	539.626	527.015	0.930865		17.2	173	567.939	556.437	0.966878		17.202	173	380.329	367.54	0.920829		17.1989	173	691.847	678.705	0.960153		17.196	173
17.2998	174	503.719	490.703	0.848956		17.296	174	909.641	895.549	0.905148		17.2998	174	496.554	485.212	0.983097		17.2988	174	414.544	401.059	0.930625		17.2998	174	527.014	514.403	0.908588		17.2998	174	551.638	540.136	0.938553		17.3018	174	385.966	373.177	0.934952		17.2988	174	679.829	666.687	0.943152		17.296	174
17.3996	175	496.14	483.124	0.835844		17.3959	175	918.867	904.775	0.914473		17.3996	175	478.525	467.183	0.946568		17.3986	175	393.997	380.512	0.882947		17.3996	175	537.908	525.297	0.92783		17.3996	175	569.485	557.983	0.969564		17.4016	175	389.688	376.899	0.944277		17.3986	175	688.137	674.995	0.954905		17.3959	175
17.4995	176	501.309	488.293	0.844786		17.4969	176	923.068	908.976	0.918719		17.4995	176	493.213	481.871	0.976327		17.4985	176	405.906	392.421	0.910581		17.4995	176	530.19	517.579	0.914198		17.4995	176	563.631	552.129	0.959392		17.5015	176	387.202	374.413	0.938049		17.4985	176	689.701	676.559	0.957117		17.4959	176
17.5993	177	498.245	485.229	0.839485		17.5968	177	917.963	903.871	0.913559		17.6003	177	498.723	487.381	0.987491		17.5993	177	394.935	381.45	0.885124		17.5993	177	525.891	513.28	0.906604		17.6003	177	568.25	556.748	0.967419		17.6023	177	378.379	365.59	0.915944		17.5993	177	698.04	684.898	0.968914		17.5958	177
17.7002	178	503.472	490.456	0.848528		17.6968	178	910.384	896.292	0.905899		17.7002	178	485.64	474.298	0.960983		17.6972	178	402.381	388.896	0.902402		17.6982	178	540.677	528.066	0.932721		17.7002	178	559.073	547.571	0.951472		17.7022	178	367.792	355.003	0.889419		17.6992	178	682.063	668.921	0.946312		17.6958	178
17.8	179	509.618	496.602	0.859162		17.7968	179	904.207	890.115	0.899656		17.8	179	499.777	488.435	0.989627		17.799	179	407.045	393.56	0.913224		17.8	179	523.538	510.927	0.902448		17.8	179	573.994	562.492	0.977399		17.802	179	383.38	370.591	0.928473		17.799	179	679.135	665.993	0.94217		17.7968	179
17.8999	180	511.085	498.069	0.8617		17.8967	180	930.064	915.972	0.92579		17.8999	180	471.255	459.913	0.931838		17.8989	180	417.963	404.478	0.938558		17.8999	180	532.431	519.82	0.918156		17.8999	180	578.07	566.568	0.984482		17.9019	180	386.817	374.028	0.937084		17.8989	180	682.206	669.064	0.946514		17.8967	180
17.9997	181	497.354	484.338	0.837944		17.9967	181	921.535	907.443	0.917169		17.9997	181	477.866	466.524	0.945232		17.9987	181	426.306	412.821	0.957918		17.9997	181	510.795	498.184	0.87994		17.9997	181	569.122	557.62	0.968934		18.0017	181	380.706	367.917	0.921774		17.9987	181	662.168	649.026	0.918167		17.9947	181
18.0996	182	499.095	486.079	0.840956		18.0966	182	922.128	908.036	0.917769		18.1006	182	493.534	482.192	0.976978		18.0986	182	420.414	406.929	0.944246		18.0996	182	517.954	505.343	0.892585		18.1006	182	561.346	549.844	0.955422		18.1026	182	373.897	361.108	0.904715		18.0996	182	679.826	666.684	0.943147		18.0966	182
18.2004	183	503.258	490.242	0.848158		18.1966	183	918.517	904.425	0.914119		18.2004	183	479.956	468.614	0.949467		18.1994	183	419.947	406.462	0.943162		18.2004	183	512.472	499.861	0.882903		18.2004	183	565.229	553.727	0.962169		18.2024	183	397.2	384.411	0.963098		18.1994	183	669.019	655.877	0.927859		18.1966	183
18.3003	184	489.046	476.03	0.82357		18.2955	184	925.721	911.629	0.9214		18.2983	184	486.478	475.136	0.962681		18.2993	184	426.225	412.74	0.95773		18.3003	184	519.681	507.07	0.895636		18.3003	184	564.014	552.512	0.960058		18.3023	184	384.269	371.48	0.930701		18.2993	184	664.811	651.669	0.921906		18.2965	184
18.4001	185	497.866	484.85	0.83883		18.3965	185	916.582	902.49	0.912163		18.4001	185	509.049	497.707	1.00841		18.3971	185	420.657	407.172	0.94481		18.3981	185	525.84	513.229	0.906514		18.4001	185	567.354	555.852	0.965862		18.4021	185	383.936	371.147	0.929866		18.3991	185	673.728	660.586	0.934521		18.3965	185
18.499	186	512.88	499.864	0.864805		18.4965	186	910.782	896.69	0.906301		18.5	186	484.217	472.875	0.9581		18.499	186	407.94	394.455	0.915301		18.5	186	529.129	516.518	0.912324		18.5	186	566.29	554.788	0.964013		18.501	186	376.03	363.241	0.910059		18.499	186	689.714	676.572	0.957136		18.4965	186
18.5998	187	503.257	490.241	0.848157		18.5974	187	927.344	913.252	0.923041		18.5988	187	499.595	488.253	0.989258		18.5988	187	419.444	405.959	0.941995		18.5998	187	531.292	518.681	0.916144		18.6008	187	558.307	546.805	0.950141		18.6028	187	379.727	366.938	0.919321		18.5988	187	682.328	669.186	0.946687		18.5964	187
18.6986	188	511.299	498.283	0.86207		18.6974	188	919.252	905.16	0.914862		18.7006	188	498.945	487.603	0.987941		18.6976	188	416.542	403.057	0.935261		18.7006	188	535.205	522.594	0.923056		18.6986	188	558.475	546.973	0.950433		18.7026	188	366.462	353.673	0.886087		18.6996	188	687.252	674.11	0.953653		18.6954	188
18.8005	189	494.637	481.621	0.833243		18.7973	189	910.183	896.091	0.905696		18.7985	189	473.084	461.742	0.935544		18.7995	189	417.32	403.835	0.937066		18.7985	189	540.822	528.211	0.932977		18.8005	189	572.082	560.58	0.974077		18.8025	189	384.382	371.593	0.930984		18.7995	189	687.686	674.544	0.954267		18.7963	189
18.8983	190	492.381	479.365	0.82934		18.8973	190	909.033	894.941	0.904533		18.9003	190	479.259	467.917	0.948055		18.8973	190	402.601	389.116	0.902912		18.8983	190	521.941	509.33	0.899628		18.8983	190	566.516	555.014	0.964405		18.9023	190	373.001	360.212	0.90247		18.8973	190	693.71	680.568	0.962789		18.8963	190
18.9982	191	503.251	490.235	0.848146		18.9952	191	927.024	912.932	0.922717		19.0002	191	473.345	462.003	0.936072		18.9992	191	424.586	411.101	0.953926		19.0002	191	538.668	526.057	0.929172		19.0002	191	564.352	552.85	0.960645		19.0012	191	371.482	358.693	0.898664		18.9992	191	684.713	671.571	0.950061		18.9972	191
19.1	192	500.736	487.72	0.843795		19.0972	192	915.296	901.204	0.910863		19.099	192	485.877	474.535	0.961464		19.098	192	412.424	398.939	0.925706		19.099	192	528.742	516.131	0.91164		19.099	192	568.971	557.469	0.968671		19.102	192	372.075	359.286	0.90015		19.098	192	678.45	665.308	0.941201		19.0972	192
19.1989	193	525.073	512.057	0.8859		19.1952	193	931.066	916.974	0.926802		19.1989	193	481.921	470.579	0.953448		19.1979	193	428.341	414.856	0.96264		19.2009	193	538.741	526.13	0.929301		19.1989	193	562.267	550.765	0.957022		19.2029	193	366.382	353.593	0.885887		19.1999	193	676.953	663.811	0.939083		19.1952	193
19.3007	194	498.476	485.46	0.839885		19.2951	194	938.888	924.796	0.934708		19.2987	194	491.202	479.86	0.972253		19.2997	194	408.696	395.211	0.917055		19.2987	194	533.025	520.414	0.919205		19.2987	194	560.253	548.751	0.953523		19.3027	194	373.874	361.085	0.904657		19.2997	194	697.982	684.84	0.968832		19.2971	194
19.3986	195	494.788	481.772	0.833504		19.3971	195	944.735	930.643	0.940618		19.4006	195	478.743	467.401	0.947009		19.3976	195	417.819	404.334	0.938224		19.3986	195	539.221	526.61	0.930149		19.3986	195	571.045	559.543	0.972275		19.4006	195	367.694	354.905	0.889174		19.3996	195	683.727	670.585	0.948666		19.3951	195
19.4984	196	506.169	493.153	0.853195		19.496	196	957.886	943.794	0.95391		19.5004	196	482.38	471.038	0.954378		19.4994	196	400.614	387.129	0.898301		19.5004	196	538.707	526.096	0.929241		19.5004	196	549.834	538.332	0.935418		19.5014	196	373.08	360.291	0.902668		19.4994	196	675.781	662.639	0.937425		19.495	196
19.6003	197	495.927	482.911	0.835475		19.597	197	938.007	923.915	0.933818		19.5993	197	486.989	475.647	0.963717		19.5983	197	406.223	392.738	0.911317		19.5993	197	534.415	521.804	0.92166		19.5993	197	560.937	549.435	0.954711		19.6023	197	374	361.211	0.904973		19.5993	197	673.177	660.035	0.933741		19.595	197
19.6991	198	491.641	478.625	0.82806		19.6959	198	926.25	912.158	0.921935		19.7011	198	482.722	471.38	0.955071		19.6981	198	395.21	381.725	0.885762		19.6991	198	551.305	538.694	0.951493		19.6991	198	561.891	550.389	0.956369		19.7031	198	380.021	367.232	0.920058		19.6981	198	684.661	671.519	0.949987		19.6959	198
19.799	199	485.452	472.436	0.817352		19.7959	199	907.363	893.271	0.902845		19.799	199	484.722	473.38	0.959123		19.8	199	397.706	384.221	0.891554		19.799	199	562.456	549.845	0.971189		19.799	199	562.436	550.934	0.957316		19.803	199	378.834	366.045	0.917084		19.798	199	679.575	666.433	0.942792		19.7959	199
19.8988	200	510.247	497.231	0.86025		19.8958	200	879.963	865.871	0.875152		19.9008	200	485.351	474.009	0.960398		19.8978	200	397.567	384.082	0.891231		19.8988	200	550.78	538.169	0.950566		19.8988	200	574.823	563.321	0.97884		19.9008	200	382.974	370.185	0.927456		19.8978	200	684.39	671.248	0.949604		19.8958	200
[truncated: 12 more columns]

## Sheet: MRC5 24hUV
Cell 00						Cell 01						Cell 02						Cell 03						Cell 04						Cell 05						Cell 06						Cell 07						Cell 08
	paste BG		average pre-bleach				paste BG		average pre-bleach				paste BG		average pre-bleach				paste BG		average pre-bleach				paste BG		average pre-bleach				paste BG		average pre-bleach				paste BG		average pre-bleach				paste BG		average pre-bleach				paste BG
	1	8.374	1306.08				1	10.374	846.714				1	12.008	689.775				1	8.456	728.495				1	11.158	923.786				1	11.543	1029.67				1	12.452	572.647				1	11.49	1762.44				1
	paste FRAP	RAW					paste FRAP	RAW					paste FRAP	RAW					paste FRAP	RAW					paste FRAP	RAW					paste FRAP	RAW					paste FRAP	RAW					paste FRAP	RAW					paste FRAP
Time	data here		minus BG	Normalized		Time	data here		minus BG	Normalized		Time	data here		minus BG	Normalized		Time	data here		minus BG	Normalized		Time	data here		minus BG	Normalized		Time	data here		minus BG	Normalized		Time	data here		minus BG	Normalized		Time	data here		minus BG	Normalized		Time	data here
0	1	1392.57	1384.19	1.05981		0	1	891.999	881.625	1.04123		0	1	757.156	745.148	1.08028		0	1	785.135	776.679	1.06614		0	1	1024.96	1013.81	1.09745		0	1	1090.95	1079.41	1.0483		0	1	599.893	587.441	1.02583		0	1	1860.67	1849.18	1.04921		0	1
0.0798342	2	1397.98	1389.61	1.06395		0.0798342	2	889.586	879.212			0.0798342	2	746.812	734.804			0.0798342	2	769.529	761.073	1.04472		0.0779433	2	968.567	957.409	1.0364		0.0779433	2	1091.82	1080.28	1.04915		0.0798342	2	611.946	599.494	1.04688		0.0817251	2	1810.12	1798.63	1.02053		0.0798342	2
0.171676	3	1361.88	1353.5	1.03631		0.171676	3	866.682	856.308			0.170675	3	745.703	733.695			0.172676	3	751.06	742.604	1.01937		0.169895	3	953.013	941.855	1.01956		0.172897	3	1056.81	1045.26	1.01514		0.171676	3	590.435	577.983	1.00932		0.171455	3	1820.21	1808.72	1.02626		0.171676	3
0.271522	4	1402.67	1394.3	1.06754		0.271522	4	860.455	850.081			0.270521	4	730.462	718.454			0.272523	4	776.326	767.87	1.05405		0.269852	4	950.193	939.035	1.01651		0.271853	4	1058.56	1047.02	1.01684		0.271522	4	594.664	582.212	1.0167		0.273192	4	1794.51	1783.02	1.01167		0.271522	4
0.371368	5	1381.28	1372.9	1.05116		0.372369	5	856.151	845.777			0.370368	5	720.937	708.929			0.372369	5	780.029	771.573	1.05913		0.369808	5	935.567	924.409	1.00067		0.371809	5	1070.84	1059.3	1.02877		0.371368	5	582.025	569.573	0.994632		0.371928	5	1812.78	1801.29	1.02204		0.371368	5
0.471215	6	1357.33	1348.95	1.03282		0.472215	6	850.379	840.005			0.472215	6	710.356	698.348			0.472215	6	731.742	723.286	0.99285		0.469765	6	951.899	940.741	1.01835		0.471766	6	1038.88	1027.34	0.997731		0.471215	6	588.772	576.32	1.00641		0.471664	6	1831.47	1819.98	1.03265		0.471215	6
0.572061	7	1360.93	1352.56	1.03559		0.57006	7	870.243	859.869			0.571061	7	711.53	699.522			0.572061	7	755.604	747.148	1.02561		0.569721	7	956.196	945.038	1.02301		0.571723	7	1065.67	1054.13	1.02375		0.571061	7	575.715	563.263	0.983613		0.5714	7	1825.43	1813.94	1.02922		0.572061	7
0.671908	8	1346.81	1338.44	1.02478		0.671908	8	837.767	827.393			0.670907	8	703.665	691.657			0.672908	8	749.044	740.588	1.0166		0.669678	8	927.687	916.529	0.992144		0.67368	8	1066.78	1055.24	1.02483		0.671908	8	580.827	568.375	0.99254		0.672136	8	1817.59	1806.1	1.02477		0.671908	8
0.771754	9	1330.75	1322.38	1.01248		0.771754	9	853.499	843.125			0.770753	9	717.49	705.482			0.772755	9	745.814	737.358	1.01217		0.768634	9	924.536	913.378	0.988733		0.771636	9	1026.7	1015.16	0.985902		0.771754	9	597.529	585.077	1.02171		0.771872	9	1780.66	1769.17	1.00382		0.771754	9
0.8706	10	1355.07	1346.69	1.03109		0.8716	10	851.216	840.842			0.8706	10	714.996	702.988			0.872601	10	735.118	726.662	0.997484		0.870592	10	945.783	934.625	1.01173		0.871592	10	1068.86	1057.31	1.02684		0.8716	10	579.608	567.156	0.990411		0.871608	10	1770.92	1759.43	0.998293		0.8716	10
0.971447	11	1326.58	1318.2	1.00928		0.972447	11	861.332	850.958			0.970446	11	723.307	711.299			0.972447	11	736.9	728.444	0.999931		0.970548	11	928.795	917.637	0.993344		0.971549	11	1041.43	1029.89	1.00021		0.971447	11	591.464	579.012	1.01111		0.972345	11	1754.6	1743.11	0.989029		0.971447	11
1.07029	12	1336.37	1327.99	1.01678		1.07029	12	879.709	869.335			1.07129	12	712.747	700.739			1.07229	12	734.107	725.651	0.996097		1.07051	12	948.786	937.628	1.01498		1.07151	12	1033.38	1021.84	0.992389		1.07129	12	570.36	557.908	0.974261		1.07208	12	1770.19	1758.7	0.997877		1.07229	12
1.17214	13	1317.97	1309.6	1.0027		1.17214	13	874.227	863.853			1.17114	13	706.792	694.784			1.17314	13	745.1	736.644	1.01119		1.17046	13	954.743	943.585	1.02143		1.17146	13	1049.59	1038.05	1.00813		1.17214	13	592.288	579.836	1.01255		1.17182	13	1795.96	1784.47	1.0125		1.17214	13
1.27199	14	1307.95	1299.58	0.995021		1.27199	14	856.803	846.429			1.27099	14	710.253	698.245			1.27299	14	742.574	734.118	1.00772		1.26842	14	961.477	950.319	1.02872		1.27242	14	1051.53	1039.99	1.01001		1.27199	14	590.477	578.025	1.00939		1.27155	14	1777.54	1766.05	1.00205		1.27199	14
1.37083	15	1328.81	1320.43	1.01099		1.37183	15	842.342	831.968			1.37083	15	708.808	696.8			1.37283	15	733.059	724.603	0.994658		1.37037	15	932.37	921.212	0.997214		1.37238	15	1073.46	1061.91	1.03131		1.37183	15	595.689	583.237	1.01849		1.37229	15	1770.29	1758.8	0.997933		1.37183	15
1.47168	16	1314.37	1306	0.999938		1.47068	16	851.655	841.281			1.47068	16	703.179	691.171			1.47268	16	725.623	717.167	0.984451		1.46933	16	914.988	903.83	0.978398		1.47233	16	1007.91	996.367	0.967653		1.47168	16	588.171	575.719	1.00536		1.47002	16	1759.15	1747.66	0.991613		1.47168	16
1.57052	17	1305.12	1296.74	0.992852		1.57052	17	868.301	857.927			1.57153	17	689.165	677.157			1.57253	17	740.086	731.63	1.0043		1.57029	17	939.567	928.409	1.005		1.57229	17	1055.87	1044.33	1.01423		1.57153	17	572.251	559.799	0.977563		1.57176	17	1775.5	1764.01	1.00089		1.57253	17
1.67237	18	1298.2	1289.83	0.987559		1.67037	18	848.421	838.047			1.67137	18	701.693	689.685			1.67137	18	744.278	735.822	1.01006		1.67024	18	932.5	921.342	0.997354		1.67225	18	1037.4	1025.86	0.996298		1.67137	18	574.826	562.374	0.98206		1.6725	18	1770.13	1758.64	0.997843		1.67237	18
1.77222	19	1300.49	1292.11	0.989305		1.77122	19	823.849	813.475			1.77122	19	685.904	673.896			1.77322	19	734.866	726.41	0.997138		1.7692	19	937.232	926.074	1.00248		1.7722	19	1034.93	1023.39	0.993892		1.77222	19	586.103	573.651	1.00175		1.77223	19	1773.85	1762.36	0.99995		1.77222	19
1.87106	20	1308.68	1300.31	0.995579		1.87206	20	864.24	853.866			1.87106	20	675.979	663.971			1.87106	20	732.913	724.457	0.994458		1.87116	20	898.981	887.823	0.96107		1.87216	20	1026.66	1015.12	0.985866		1.87206	20	589.363	576.911	1.00745		1.87197	20	1792.12	1780.63	1.01032		1.87106	20
2.03032	21	922.202	913.828	0.699672		2.03132	21	613.122	602.748			2.03032	21	507.046	495.038			2.03032	21	528.607	520.151	0.714008		2.02663	21	641.009	629.851	0.681815		2.02763	21	752.084	740.541	0.719199		2.03132	21	411.303	398.851	0.696504		2.035	21	1194.16	1182.67	0.67104		2.03032	21
2.11015	22	1007.23	998.854	0.764772		2.11115	22	659.095	648.721			2.11015	22	559.738	547.73			2.11015	22	567.267	558.811	0.767076		2.10457	22	688.816	677.658	0.733566		2.10557	22	813.96	802.417	0.779292		2.11115	22	452.215	439.763	0.767948		2.11673	22	1282.9	1271.41	0.721393		2.11015	22
2.19999	23	1051.71	1043.34	0.798829		2.19999	23	689.57	679.196			2.19899	23	565.782	553.774			2.19899	23	581.085	572.629	0.786044		2.19452	23	730.437	719.279	0.778621		2.19652	23	843.298	831.755	0.807785		2.19999	23	480.759	468.307	0.817793		2.20346	23	1342.44	1330.95	0.755175		2.19999	23
2.29984	24	1085.59	1077.22	0.82477		2.29984	24	692.592	682.218			2.29884	24	572.052	560.044			2.29884	24	615.835	607.379	0.833745		2.29548	24	763.859	752.701	0.8148		2.29648	24	850.288	838.745	0.814573		2.29984	24	496.39	483.938	0.845089		2.30419	24	1355.69	1344.2	0.762689		2.29984	24
2.39968	25	1114.68	1106.31	0.847042		2.39968	25	711.818	701.444			2.39868	25	599.266	587.258			2.39868	25	632.091	623.635	0.85606		2.39544	25	751.375	740.217	0.801286		2.39644	25	871.862	860.319	0.835526		2.39968	25	492.489	480.037	0.838277		2.40493	25	1416.07	1404.58	0.796948		2.39968	25
2.49953	26	1120.81	1112.43	0.851734		2.50053	26	719.662	709.288			2.49853	26	626.922	614.914			2.49953	26	628.505	620.049	0.851137		2.49539	26	790.56	779.402	0.843704		2.49639	26	910.333	898.79	0.872888		2.49953	26	504.187	491.735	0.858705		2.50467	26	1424.45	1412.96	0.801703		2.49953	26
2.60038	27	1155.11	1146.74	0.877999		2.60038	27	738.722	728.348			2.59938	27	612.571	600.563			2.59938	27	638.826	630.37	0.865305		2.59535	27	798.712	787.554	0.852529		2.59635	27	916.904	905.361	0.87927		2.59938	27	492.678	480.226	0.838607		2.6044	27	1420.73	1409.24	0.799593		2.60038	27
2.70022	28	1140.94	1132.56	0.867146		2.70022	28	732.9	722.526			2.69922	28	624.602	612.594			2.69922	28	642.292	633.836	0.870063		2.69331	28	795.436	784.278	0.848982		2.69631	28	919.16	907.617	0.881461		2.69922	28	513.473	501.021	0.874921		2.70514	28	1434.02	1422.53	0.807137		2.70022	28
2.80007	29	1160.33	1151.96	0.881996		2.80007	29	739.068	728.694			2.79907	29	621.865	609.857			2.79907	29	646.527	638.071	0.875876		2.79526	29	814.058	802.9	0.869141		2.79726	29	928.684	917.141	0.89071		2.79807	29	496.644	484.192	0.845533		2.80488	29	1479.16	1467.67	0.832749		2.80007	29
2.89992	30	1136.27	1127.89	0.863572		2.89992	30	735.371	724.997			2.89891	30	634.613	622.605			2.89891	30	643.028	634.572	0.871073		2.89322	30	810.914	799.756	0.865737		2.89722	30	929.807	918.264	0.891801		2.89992	30	517.399	504.947	0.881777		2.90461	30	1502.15	1490.66	0.845792		2.89992	30
2.99976	31	1164.96	1156.59	0.885542		3.00076	31	736.707	726.333			2.99876	31	643.198	631.19			2.99876	31	641.686	633.23	0.869231		2.99518	31	813.732	802.574	0.868788		2.99718	31	902.084	890.541	0.864877		2.99776	31	523.282	510.83	0.89205		3.00535	31	1516.76	1505.27	0.854081		2.99876	31
3.10061	32	1156.37	1147.99	0.87896		3.10061	32	746.65	736.276			3.09761	32	619.552	607.544			3.09961	32	670.974	662.518	0.909434		3.09513	32	835.697	824.539	0.892565		3.09713	32	944.077	932.534	0.905659		3.09961	32	513.902	501.45	0.87567		3.10508	32	1529.49	1518	0.861302		3.10061	32
3.19845	33	1154.81	1146.43	0.877766		3.20046	33	748.113	737.739			3.19945	33	635.237	623.229			3.19945	33	661.323	652.867	0.896186		3.19409	33	835.855	824.697	0.892736		3.19709	33	914.979	903.436	0.8774		3.19945	33	521.993	509.541	0.889799		3.20482	33	1490.77	1479.28	0.839336		3.20046	33
3.3003	34	1166.16	1157.79	0.886462		3.2993	34	745.119	734.745			3.2973	34	631.879	619.871			3.2993	34	685.781	677.325	0.92976		3.29505	34	837.629	826.471	0.894656		3.29705	34	930.739	919.196	0.892706		3.2983	34	519.517	507.065	0.885475		3.30556	34	1532.63	1521.14	0.863086		3.3003	34
3.39915	35	1123.6	1115.22	0.853869		3.40015	35	730.875	720.501			3.39915	35	638.435	626.427			3.39815	35	684.108	675.652	0.927463		3.394	35	835.902	824.744	0.892787		3.395	35	932.848	921.305	0.894754		3.40015	35	523.757	511.305	0.89288		3.40529	35	1540.03	1528.54	0.867284		3.40015	35
3.49999	36	1148.29	1139.91	0.872773		3.50099	36	760.042	749.668			3.49799	36	643.739	631.731			3.49899	36	672.482	664.026	0.911504		3.49596	36	823.049	811.891	0.878874		3.49696	36	943.11	931.567	0.90472		3.49999	36	519.467	507.015	0.885388		3.50503	36	1521.83	1510.34	0.856955		3.49899	36
3.60084	37	1154.8	1146.43	0.877763		3.59884	37	762.719	752.345			3.59984	37	655.97	643.962			3.59984	37	654.027	645.571	0.886171		3.59392	37	829.761	818.603	0.886139		3.59592	37	955.612	944.069	0.916862		3.59984	37	536.563	524.111	0.915242		3.60476	37	1532.17	1520.68	0.862827		3.60084	37
3.69869	38	1156.85	1148.48	0.879331		3.69869	38	753.845	743.471			3.69969	38	654.624	642.616			3.69969	38	679.502	671.046	0.921141		3.69387	38	814.136	802.978	0.869225		3.69687	38	958.035	946.492	0.919215		3.69869	38	514.863	502.411	0.877348		3.7055	38	1558.01	1546.52	0.877487		3.70069	38
3.80053	39	1162.01	1153.63	0.88328		3.79953	39	770.297	759.923			3.79753	39	651.427	639.419			3.79753	39	671.422	662.966	0.910049		3.79583	39	816.565	805.407	0.871855		3.79583	39	967.787	956.244	0.928686		3.79853	39	515.163	502.711	0.877872		3.80324	39	1540.79	1529.3	0.867718		3.80053	39
3.89838	40	1156.28	1147.91	0.878896		3.90038	40	786.769	776.395			3.89938	40	641.274	629.266			3.89838	40	679.837	671.381	0.921601		3.89379	40	843.689	832.531	0.901216		3.89579	40	954.516	942.973	0.915798		3.90038	40	515.612	503.16	0.878656		3.90497	40	1536.73	1525.24	0.86541		3.89938	40
4.00023	41	1170.05	1161.68	0.889437		3.99923	41	766.525	756.151			3.99923	41	631.576	619.568			3.99923	41	678.084	669.628	0.919194		3.99574	41	851.513	840.355	0.909686		3.99574	41	952.597	941.054	0.913934		3.99822	41	536.593	524.141	0.915295		4.00571	41	1551.67	1540.18	0.87389		3.99923	41
4.10007	42	1159	1150.63	0.880979		4.09907	42	779.095	768.721			4.09807	42	636.773	624.765			4.10007	42	670.653	662.197	0.908994		4.0937	42	811.474	800.316	0.866344		4.0977	42	949.281	937.738	0.910713		4.10007	42	517.611	505.159	0.882147		4.10344	42	1549	1537.51	0.872373		4.10107	42
4.19892	43	1171.8	1163.42	0.890774		4.19892	43	743.076	732.702			4.19992	43	637.506	625.498			4.19992	43	659.212	650.756	0.893289		4.19466	43	827.305	816.147	0.883481		4.19766	43	952.188	940.645	0.913537		4.19892	43	529.988	517.536	0.903761		4.20518	43	1571.39	1559.9	0.885078		4.19892	43
4.29876	44	1188.49	1180.12	0.903556		4.29976	44	779.916	769.542			4.29776	44	644.79	632.782			4.29776	44	666.497	658.041	0.903289		4.29561	44	812.14	800.982	0.867065		4.29561	44	950.041	938.498	0.911452		4.29876	44	534.373	521.921	0.911418		4.30392	44	1598.37	1586.88	0.900385		4.30077	44
4.39861	45	1183.04	1174.66	0.899381		4.40061	45	761.504	751.13			4.39961	45	636.645	624.637			4.39861	45	692.45	683.994	0.938914		4.39457	45	832.932	821.774	0.889572		4.39557	45	950.402	938.859	0.911802		4.39861	45	533.019	520.567	0.909054		4.40565	45	1566.6	1555.11	0.88236		4.39961	45
4.49946	46	1193.28	1184.9	0.907222		4.49946	46	780.541	770.167			4.49846	46	635.376	623.368			4.49846	46	690.679	682.223	0.936483		4.49453	46	831.265	820.107	0.887767		4.49553	46	953.185	941.642	0.914505		4.49846	46	524.545	512.093	0.894256		4.50539	46	1583.98	1572.49	0.892222		4.49946	46
4.6003	47	1161.39	1153.01	0.882804		4.5993	47	780.725	770.351			4.5983	47	661.201	649.193			4.5983	47	678.884	670.428	0.920292		4.59448	47	839.974	828.816	0.897195		4.59548	47	961.4	949.857	0.922483		4.5993	47	522.987	510.535	0.891535		4.60413	47	1625.87	1614.38	0.915987		4.5993	47
4.69915	48	1173.49	1165.12	0.892074		4.69915	48	795.19	784.816			4.69815	48	656.603	644.595			4.69815	48	691.726	683.27	0.93792		4.69444	48	849.931	838.773	0.907973		4.69744	48	956.054	944.511	0.917291		4.69915	48	525.892	513.44	0.896608		4.70386	48	1613.92	1602.43	0.909209		4.69915	48
4.799	49	1179.63	1171.25	0.896769		4.8	49	797.354	786.98			4.798	49	660.059	648.051			4.798	49	667.855	659.399	0.905153		4.7944	49	831.216	820.058	0.887714		4.7964	49	974.026	962.483	0.934745		4.799	49	538.737	526.285	0.919039		4.8046	49	1596.16	1584.67	0.899131		4.799	49
4.89884	50	1188.83	1180.45	0.903813		4.90084	50	795.595	785.221			4.89884	50	656.071	644.063			4.89884	50	671.792	663.336	0.910557		4.89435	50	856.851	845.693	0.915464		4.89635	50	956.134	944.591	0.917369		4.89884	50	523.277	510.825	0.892041		4.90533	50	1629.45	1617.96	0.91802		4.89884	50
4.99969	51	1185.68	1177.31	0.901403		4.99969	51	790.938	780.564			4.99869	51	656.31	644.302			4.99869	51	682.637	674.181	0.925444		4.99431	51	838.762	827.604	0.895883		4.99631	51	952.009	940.466	0.913363		4.99869	51	535.772	523.32	0.913861		5.00407	51	1595.09	1583.6	0.898524		4.99969	51
5.09954	52	1173.44	1165.06	0.892031		5.09954	52	788.829	778.455			5.09854	52	658.508	646.5			5.09854	52	688.152	679.696	0.933014		5.09427	52	842.537	831.379	0.899969		5.09627	52	957.2	945.657	0.918404		5.09954	52	531.051	518.599	0.905617		5.10381	52	1601.49	1590	0.902157		5.09954	52
5.19938	53	1187.76	1179.39	0.902997		5.19938	53	782.779	772.405			5.19838	53	642.965	630.957			5.20038	53	671.922	663.466	0.910736		5.19422	53	849.373	838.215	0.907369		5.19622	53	994.657	983.114	0.954782		5.19938	53	538.507	526.055	0.918637		5.20454	53	1640.86	1629.37	0.924496		5.19938	53
5.29923	54	1221.87	1213.49	0.92911		5.30023	54	792.051	781.677			5.29823	54	657.227	645.219			5.29823	54	679.091	670.635	0.920576		5.29518	54	833.472	822.314	0.890156		5.29618	54	962.426	950.883	0.92348		5.29923	54	537.682	525.23	0.917196		5.30428	54	1625.21	1613.72	0.915615		5.29923	54
5.39907	55	1184.37	1175.99	0.9004		5.40008	55	798.747	788.373			5.39807	55	669.684	657.676			5.39907	55	686.91	678.454	0.93131		5.39514	55	853.052	841.894	0.911352		5.39614	55	964.58	953.037	0.925572		5.39907	55	531.189	518.737	0.905858		5.40401	55	1633.07	1621.58	0.920077		5.39907	55
5.49992	56	1197.47	1189.1	0.91043		5.49992	56	807.294	796.92			5.49892	56	676.656	664.648			5.49892	56	687.04	678.584	0.931488		5.49509	56	850.578	839.42	0.908674		5.49609	56	969.087	957.544	0.929949		5.49892	56	542.957	530.505	0.926408		5.50475	56	1614.12	1602.63	0.909326		5.49992	56
5.59977	57	1209.5	1201.12	0.919639		5.59977	57	800.578	790.204			5.59877	57	676.022	664.014			5.59877	57	674.827	666.371	0.914723		5.59505	57	842.361	831.203	0.899779		5.59605	57	982.317	970.774	0.942797		5.59977	57	554.542	542.09	0.946639		5.60449	57	1635.6	1624.11	0.921512		5.59977	57
5.69961	58	1235.39	1227.01	0.939463		5.69961	58	824.119	813.745			5.69861	58	655.463	643.455			5.69861	58	672.844	664.388	0.912001		5.69501	58	857.852	846.694	0.916548		5.69601	58	955.339	943.796	0.916597		5.69961	58	537.289	524.837	0.91651		5.70622	58	1696.11	1684.62	0.955845		5.69961	58
5.79946	59	1184.74	1176.37	0.900685		5.79946	59	802.713	792.339			5.79846	59	658.879	646.871			5.79846	59	693.794	685.338	0.940759		5.79496	59	844.966	833.808	0.902599		5.79596	59	954.756	943.213	0.916031		5.79946	59	530.054	517.602	0.903876		5.80496	59	1671.09	1659.6	0.941646		5.79946	59
5.89931	60	1196.43	1188.06	0.909634		5.90031	60	817.35	806.976			5.89831	60	670.693	658.685			5.89931	60	658.983	650.527	0.892974		5.89492	60	858.961	847.803	0.917748		5.89692	60	959.498	947.955	0.920636		5.89931	60	542.382	529.93	0.925404		5.9047	60	1677.2	1665.71	0.945115		5.89931	60
6.00015	61	1223.71	1215.33	0.930519		6.00015	61	792.141	781.767			5.99915	61	675.407	663.399			5.99915	61	673.622	665.166	0.913069		5.99488	61	856.851	845.693	0.915464		5.99688	61	992.854	981.311	0.953031		5.99915	61	532.128	519.676	0.907498		6.00443	61	1680.48	1668.99	0.946975		6.00015	61
6.1	62	1206.3	1197.92	0.917188		6.098	62	826.04	815.666			6.099	62	662.012	650.004			6.099	62	690.776	682.32	0.936616		6.09483	62	846.432	835.274	0.904186		6.09683	62	978.6	967.057	0.939188		6.1	62	532.161	519.709	0.907555		6.10417	62	1688.91	1677.42	0.951761		6.1	62
6.19985	63	1216.57	1208.2	0.925056		6.19985	63	826.696	816.322			6.19885	63	682.354	670.346			6.19885	63	689.761	681.305	0.935223		6.19479	63	844.998	833.84	0.902633		6.19679	63	971.046	959.503	0.931851		6.19985	63	549.056	536.604	0.937059		6.2049	63	1664.25	1652.76	0.937766		6.19985	63
6.29969	64	1239.44	1231.07	0.942567		6.29969	64	805.102	794.728			6.29869	64	679.237	667.229			6.29869	64	691.875	683.419	0.938125		6.29474	64	858.133	846.975	0.916852		6.29675	64	973.461	961.918	0.934197		6.29769	64	543.659	531.207	0.927634		6.30464	64	1671.05	1659.56	0.941623		6.29969	64
6.39954	65	1235.76	1227.39	0.93975		6.40054	65	811.836	801.462			6.39854	65	662.429	650.421			6.39954	65	688.581	680.125	0.933603		6.3947	65	851.61	840.452	0.909791		6.3947	65	969.315	957.772	0.93017		6.39954	65	550.944	538.492	0.940356		6.40438	65	1677.07	1665.58	0.945038		6.39954	65
6.50039	66	1222.96	1214.59	0.929948		6.50039	66	797.51	787.136			6.49939	66	669.281	657.273			6.49939	66	679.737	671.281	0.921463		6.49566	66	852.378	841.22	0.910622		6.49666	66	962.445	950.902	0.923498		6.49939	66	542.573	530.121	0.925738		6.50511	66	1677.63	1666.14	0.945357		6.49838	66
6.60023	67	1231.13	1222.76	0.936203		6.59823	67	801.828	791.454			6.59923	67	653.504	641.496			6.59923	67	669.779	661.323	0.907794		6.59562	67	847.803	836.645	0.90567		6.59662	67	975.598	964.055	0.936272		6.59923	67	531.937	519.485	0.907164		6.60485	67	1647.65	1636.16	0.92835		6.60023	67
6.69808	68	1226.76	1218.39	0.932857		6.70008	68	807.577	797.203			6.69908	68	655.625	643.617			6.69908	68	676.719	668.263	0.91732		6.69357	68	867.075	855.917	0.926532		6.69657	68	974.712	963.169	0.935412		6.70008	68	546.886	534.434	0.933269		6.70459	68	1634.38	1622.89	0.920816		6.69808	68
6.79992	69	1238.74	1230.37	0.942028		6.79892	69	805.908	795.534			6.79892	69	656.73	644.722			6.79892	69	671.192	662.736	0.909734		6.79553	69	858.016	846.858	0.916725		6.79653	69	978.024	966.481	0.938628		6.79792	69	522.236	509.784	0.890224		6.80532	69	1644.53	1633.04	0.926577		6.79992	69
6.89977	70	1230.55	1222.18	0.935758		6.90077	70	820.985	810.611			6.89877	70	646.623	634.615			6.89777	70	693.28	684.824	0.940054		6.89549	70	874.414	863.256	0.934476		6.89549	70	957.254	945.711	0.918457		6.89977	70	547.728	535.276	0.93474		6.90506	70	1635.82	1624.33	0.921635		6.89977	70
7.00062	71	1272.42	1264.05	0.967816		6.99862	71	793.966	783.592			6.99962	71	663.203	651.195			6.99962	71	672.746	664.29	0.911867		6.99544	71	887.069	875.911	0.948175		6.99644	71	964.63	953.087	0.92562		6.99862	71	538.692	526.24	0.91896		7.00479	71	1672.02	1660.53	0.942176		6.99862	71
7.09846	72	1244.07	1235.69	0.946108		7.09846	72	821.37	810.996			7.09746	72	657.336	645.328			7.09946	72	679.269	670.813	0.920821		7.0934	72	857.777	846.619	0.916467		7.0954	72	966.204	954.661	0.927149		7.09946	72	539.633	527.181	0.920603		7.10553	72	1655.44	1643.95	0.932769		7.10046	72
7.19831	73	1264.69	1256.32	0.9619		7.20031	73	805.811	795.437			7.19931	73	671.023	659.015			7.19931	73	697.911	689.455	0.946411		7.19435	73	850.992	839.834	0.909122		7.19736	73	976.291	964.748	0.936945		7.20031	73	527.157	514.705	0.898817		7.20527	73	1654.02	1642.53	0.93196		7.20031	73
7.30016	74	1229.93	1221.56	0.935284		7.29916	74	809.189	798.815			7.29816	74	658.033	646.025			7.29916	74	677.756	669.3	0.918744		7.29531	74	864.991	853.833	0.924276		7.29731	74	982.484	970.941	0.94296		7.29816	74	525.887	513.435	0.896599		7.305	74	1663.03	1651.54	0.937075		7.30016	74
7.399	75	1275.07	1266.7	0.969846		7.401	75	804.335	793.961			7.399	75	658.942	646.934			7.398	75	680.662	672.206	0.922733		7.39427	75	874.938	863.78	0.935043		7.39527	75	996.419	984.876	0.956493		7.4	75	549.911	537.459	0.938552		7.40474	75	1643.75	1632.26	0.926135		7.399	75
7.50085	76	1237	1228.62	0.940696		7.50085	76	812.835	802.461			7.49985	76	679.464	667.456			7.49985	76	679.855	671.399	0.921625		7.49522	76	857.111	845.953	0.915746		7.49723	76	989.66	978.117	0.949929		7.49885	76	527.55	515.098	0.899503		7.50548	76	1626.48	1614.99	0.916337		7.49885	76
7.6007	77	1255.86	1247.49	0.955138		7.5987	77	823.185	812.811			7.59769	77	656.549	644.541			7.5997	77	679.525	671.069	0.921172		7.59418	77	848.166	837.008	0.906063		7.59518	77	982.128	970.585	0.942614		7.5997	77	542.591	530.139	0.925769		7.60321	77	1647.43	1635.94	0.928225		7.5987	77
7.69854	78	1233.72	1225.35	0.938186		7.70054	78	808.41	798.036			7.69954	78	678.615	666.607			7.69954	78	682.674	674.218	0.925495		7.69414	78	868.443	857.285	0.928013		7.69714	78	994.47	982.927	0.9546		7.69854	78	536.428	523.976	0.915007		7.70495	78	1655.82	1644.33	0.932981		7.69854	78
7.79839	79	1218.9	1210.53	0.92684		7.79939	79	832.541	822.167			7.79939	79	680.872	668.864			7.79839	79	712.409	703.953	0.966312		7.79409	79	848.75	837.592	0.906695		7.7961	79	980.261	968.718	0.940801		7.79839	79	528.375	515.923	0.900944		7.80368	79	1639.71	1628.22	0.923845		7.80039	79
7.89923	80	1243.85	1235.48	0.945945		7.90124	80	840.275	829.901			7.89923	80	679.527	667.519			7.89823	80	681.276	672.82	0.923576		7.89405	80	833.323	822.165	0.889995		7.89605	80	976.751	965.208	0.937392		7.90024	80	550.944	538.492	0.940356		7.90542	80	1626.47	1614.98	0.916328		7.89923	80
8.00008	81	1239.98	1231.61	0.942982		8.00108	81	826.288	815.914			7.99808	81	666.295	654.287			8.00008	81	684.896	676.44	0.928545		7.99601	81	863.02	851.862	0.922142		7.99701	81	989.138	977.595	0.949422		7.99908	81	543.716	531.264	0.927734		8.00416	81	1638.98	1627.49	0.923427		7.99908	81
8.09893	82	1229.27	1220.9	0.934778		8.09893	82	823.053	812.679			8.09793	82	674.206	662.198			8.09993	82	683.163	674.707	0.926166		8.09396	82	847.73	836.572	0.905591		8.09597	82	961.506	949.963	0.922586		8.09893	82	537.824	525.372	0.917444		8.10389	82	1673.67	1662.18	0.943109		8.09893	82
8.19877	83	1226.93	1218.55	0.932985		8.19977	83	816.497	806.123			8.19777	83	679.923	667.915			8.19977	83	703.403	694.947	0.953949		8.19392	83	860.757	849.599	0.919693		8.19592	83	984.816	973.273	0.945224		8.19877	83	542.23	529.778	0.925139		8.20563	83	1639.67	1628.18	0.923823		8.19877	83
8.29862	84	1193.65	1185.28	0.907508		8.29962	84	816.287	805.913			8.29862	84	658.161	646.153			8.29862	84	693.269	684.813	0.940039		8.29388	84	846.147	834.989	0.903877		8.29588	84	1001.02	989.473	0.960958		8.29862	84	535.014	522.562	0.912537		8.30436	84	1635.32	1623.83	0.921354		8.30062	84
8.39947	85	1212.94	1204.57	0.922277		8.40147	85	836.981	826.607			8.39947	85	672.344	660.336			8.39847	85	681.664	673.208	0.924108		8.39483	85	854.429	843.271	0.912842		8.39583	85	1014.75	1003.21	0.974294		8.39847	85	538.383	525.931	0.918421		8.4061	85	1676.19	1664.7	0.944543		8.39947	85
8.50031	86	1258.26	1249.89	0.956975		8.49931	86	829.123	818.749			8.49831	86	661.224	649.216			8.49831	86	665.64	657.184	0.902112		8.49479	86	870.924	859.766	0.930698		8.49579	86	987.587	976.044	0.947916		8.49931	86	538.466	526.014	0.918566		8.50384	86	1669.05	1657.56	0.940489		8.49931	86
8.59916	87	1251.25	1242.88	0.951609		8.59916	87	826.617	816.243			8.59816	87	678.54	666.532			8.59816	87	687.721	679.265	0.932423		8.59475	87	879.626	868.468	0.940118		8.59575	87	993.179	981.636	0.953346		8.59916	87	538.835	526.383	0.91921		8.60457	87	1664.39	1652.9	0.937845		8.60116	87
8.69901	88	1239.56	1231.18	0.942653		8.70001	88	842.852	832.478			8.69801	88	663.462	651.454			8.69801	88	675.655	667.199	0.91586		8.6947	88	883.888	872.73	0.944732		8.69771	88	976.221	964.678	0.936877		8.69901	88	558.558	546.106	0.953652		8.70431	88	1658.43	1646.94	0.934465		8.69901	88
8.79885	89	1247.96	1239.58	0.949087		8.79985	89	841.751	831.377			8.79885	89	682.843	670.835			8.79885	89	700.122	691.666	0.949446		8.79466	89	863.733	852.575	0.922914		8.79766	89	972.654	961.111	0.933413		8.79885	89	546.555	534.103	0.932691		8.80404	89	1665.87	1654.38	0.938685		8.79885	89
8.8997	90	1214.12	1205.74	0.923176		8.8997	90	835.57	825.196			8.8997	90	692.901	680.893			8.8987	90	697.241	688.785	0.945491		8.89462	90	869.51	858.352	0.929168		8.89562	90	980.587	969.044	0.941117		8.8987	90	537.919	525.467	0.91761		8.90378	90	1675.3	1663.81	0.944035		8.8997	90
8.99955	91	1220.35	1211.98	0.927952		8.99955	91	832.989	822.615			8.99854	91	675.268	663.26			8.99854	91	677.824	669.368	0.918837		8.99457	91	884.729	873.571	0.945642		8.99658	91	959.196	947.653	0.920343		8.99955	91	547.982	535.53	0.935183		9.00452	91	1680.78	1669.29	0.947143		8.99955	91
9.09939	92	1216.6	1208.23	0.925078		9.09939	92	826.646	816.272			9.09839	92	668.243	656.235			9.09839	92	694.906	686.45	0.942286		9.09453	92	889.418	878.26	0.950718		9.09653	92	961.947	950.404	0.923014		9.10039	92	555.622	543.17	0.948525		9.10425	92	1644.83	1633.34	0.926745		9.09939	92
9.19924	93	1231.08	1222.7	0.936164		9.20024	93	823.77	813.396			9.19824	93	683.397	671.389			9.19824	93	694.903	686.447	0.942282		9.19449	93	872.392	861.234	0.932287		9.19649	93	989.363	977.82	0.94964		9.19924	93	548.066	535.614	0.93533		9.20399	93	1675.59	1664.1	0.944202		9.19924	93
9.29908	94	1217.71	1209.33	0.925924		9.30008	94	835.043	824.669			9.29808	94	669.412	657.404			9.29908	94	683.386	674.93	0.926472		9.29444	94	843.353	832.195	0.900853		9.29644	94	993.046	981.503	0.953217		9.29908	94	563.427	550.975	0.962154		9.30473	94	1712.47	1700.98	0.965124		9.29908	94
9.39993	95	1215.84	1207.46	0.924492		9.39993	95	828.271	817.897			9.39893	95	663.444	651.436			9.39893	95	688.007	679.551	0.932815		9.3944	95	854.739	843.581	0.913178		9.3964	95	986.875	975.332	0.947224		9.39893	95	551.742	539.29	0.941749		9.40446	95	1694.43	1682.94	0.95489		9.39993	95
9.49978	96	1212.5	1204.12	0.921937		9.49978	96	817.726	807.352			9.49878	96	687.38	675.372			9.49878	96	692.078	683.622	0.938404		9.49436	96	852.126	840.968	0.910349		9.49636	96	986.944	975.401	0.947291		9.49978	96	535.076	522.624	0.912646		9.5042	96	1690.17	1678.68	0.952474		9.49978	96
9.59962	97	1253.02	1244.64	0.95296		9.59962	97	814.835	804.461			9.59862	97	686.747	674.739			9.59862	97	682.948	674.492	0.925871		9.59531	97	864.878	853.72	0.924154		9.59631	97	1014.56	1003.01	0.974109		9.59962	97	531.682	519.23	0.906719		9.60493	97	1689.36	1677.87	0.952014		9.59962	97
9.69947	98	1226.87	1218.49	0.93294		9.69947	98	810.16	799.786			9.69847	98	694.897	682.889			9.69847	98	672.228	663.772	0.911156		9.69527	98	860.756	849.598	0.919691		9.69627	98	990.496	978.953	0.950741		9.69947	98	542.529	530.077	0.925661		9.70567	98	1667.24	1655.75	0.939465		9.69947	98
9.79932	99	1230.81	1222.44	0.93596		9.80032	99	819.696	809.322			9.79832	99	686.263	674.255			9.79932	99	685.9	677.444	0.929923		9.79523	99	878.383	867.225	0.938773		9.79623	99	991.462	979.919	0.951679		9.79932	99	561.309	548.857	0.958456		9.80441	99	1671.5	1660.01	0.94188		9.79932	99
9.90016	100	1219.63	1211.25	0.927395		9.90016	100	825.075	814.701			9.89916	100	692.659	680.651			9.89916	100	694.723	686.267	0.942034		9.89518	100	875.031	863.873	0.935144		9.89618	100	992.415	980.872	0.952604		9.89916	100	550.865	538.413	0.940218		9.90414	100	1685.3	1673.81	0.949709		9.90016	100
10	101	1213.18	1204.8	0.922456		10	101	832.285	821.911			9.99901	101	682.758	670.75			9.99901	101	698.513	690.057	0.947237		9.99514	101	884.131	872.973	0.944995		9.99614	101	989.447	977.904	0.949722		10	101	541.668	529.216	0.924157		10.0049	101	1666.6	1655.11	0.939102		10	101
10.0999	102	1207.45	1199.08	0.918074		10.0999	102	840.252	829.878			10.0989	102	713.075	701.067			10.0989	102	696.968	688.512	0.945116		10.0951	102	874.963	863.805	0.935071		10.0971	102	1017.03	1005.49	0.976515		10.0999	102	542.996	530.544	0.926476		10.1046	102	1687.33	1675.84	0.950859		10.0999	102
10.1987	103	1201.11	1192.73	0.913214		10.1997	103	849.536	839.162			10.1987	103	671.844	659.836			10.1987	103	687.656	679.2	0.932334		10.1931	103	846.024	834.866	0.903744		10.1971	103	993.653	982.11	0.953807		10.1997	103	549.822	537.37	0.938396		10.2044	103	1662.26	1650.77	0.936639		10.1997	103
10.2995	104	1225.66	1217.29	0.932015		10.3005	104	830.793	820.419			10.2985	104	655.164	643.156			10.2995	104	683.932	675.476	0.927222		10.295	104	862.418	851.26	0.921491		10.297	104	976.577	965.034	0.937223		10.2995	104	544.505	532.053	0.929111		10.3051	104	1690.94	1679.45	0.95291		10.2995	104
10.4004	105	1215.3	1206.92	0.924081		10.4004	105	838.021	827.647			10.3994	105	675.166	663.158			10.3994	105	690.564	682.108	0.936325		10.394	105	863.67	852.512	0.922846		10.395	105	998.23	986.687	0.958252		10.3994	105	525.452	513	0.89584		10.4048	105	1709.16	1697.67	0.96325		10.4004	105
10.5002	106	1205.59	1197.21	0.916646		10.5002	106	821.846	811.472			10.4992	106	678.498	666.49			10.4992	106	692.046	683.59	0.93836		10.4949	106	871.537	860.379	0.931362		10.4969	106	951.212	939.669	0.912589		10.4992	106	546.445	533.993	0.932499		10.5046	106	1690.38	1678.89	0.952593		10.5002	106
10.6001	107	1177.96	1169.58	0.895491		10.6001	107	824.581	814.207			10.5971	107	648.835	636.827			10.5991	107	689.4	680.944	0.934728		10.5949	107	873.806	862.648	0.933818		10.5969	107	1001.96	990.414	0.961871		10.6001	107	540.838	528.386	0.922708		10.6053	107	1716.52	1705.03	0.967422		10.6001	107
10.6989	108	1196.71	1188.34	0.909852		10.6999	108	847.932	837.558			10.6989	108	658.768	646.76			10.6989	108	700.071	691.615	0.949376		10.6938	108	869.033	857.875	0.928651		10.6968	108	1006.48	994.933	0.96626		10.6999	108	533.226	520.774	0.909415		10.705	108	1712.78	1701.29	0.965302		10.6999	108
10.7998	109	1214.33	1205.96	0.923343		10.8008	109	824.785	814.411			10.7988	109	656.509	644.501			10.7988	109	704.613	696.157	0.95561		10.7958	109	867.816	856.658	0.927334		10.7968	109	1000.22	988.679	0.960186		10.7978	109	531.947	519.495	0.907182		10.8048	109	1702.99	1691.5	0.95975		10.7998	109
10.9006	110	1216.84	1208.46	0.925258		10.9006	110	839.009	828.635			10.8996	110	654.564	642.556			10.8976	110	677.321	668.865	0.918147		10.8937	110	879.894	868.736	0.940408		10.8958	110	991.606	980.063	0.951819		10.8996	110	536.46	524.008	0.915063		10.9055	110	1703.19	1691.7	0.959863		10.9006	110
11.0005	111	1194.04	1185.66	0.907803		11.0005	111	851.864	841.49			10.9995	111	676.568	664.56			10.9995	111	687.479	679.023	0.932091		10.9957	111	882.462	871.304	0.943188		10.9967	111	993.886	982.343	0.954033		10.9995	111	537.24	524.788	0.916425		11.0052	111	1686.28	1674.79	0.950263		10.9985	111
11.1003	112	1227.41	1219.03	0.933353		11.0993	112	862.528	852.154			11.0973	112	672.144	660.136			11.0973	112	700.296	691.84	0.949684		11.0937	112	888.49	877.332	0.949714		11.0967	112	985.115	973.572	0.945515		11.1003	112	550.664	538.212	0.939867		11.104	112	1691.27	1679.78	0.953099		11.1003	112
11.1992	113	1216.2	1207.82	0.92477		11.2002	113	838.568	828.194			11.1992	113	669.231	657.223			11.1992	113	685.708	677.252	0.92966		11.1936	113	899.042	887.884	0.961136		11.1966	113	1007.77	996.23	0.96752		11.1982	113	548.387	535.935	0.93589		11.2047	113	1642.21	1630.72	0.925263		11.1992	113
11.3	114	1220.89	1212.52	0.928365		11.299	114	838.449	828.075			11.298	114	659.038	647.03			11.299	114	687.684	679.228	0.932372		11.2956	114	894.097	882.939	0.955783		11.2976	114	991.707	980.164	0.951917		11.298	114	528.789	516.337	0.901667		11.3034	114	1649.95	1638.46	0.929654		11.3	114
11.3989	115	1191.45	1183.07	0.90582		11.4009	115	863.499	853.125			11.3999	115	650.91	638.902			11.3999	115	684.446	675.99	0.927927		11.3935	115	883.911	872.753	0.944757		11.3955	115	1012.13	1000.59	0.971753		11.3999	115	541.452	529	0.92378		11.4052	115	1657.57	1646.08	0.933974		11.4009	115
11.5007	116	1214.11	1205.74	0.923172		11.5007	116	841.44	831.066			11.4997	116	668.375	656.367			11.4997	116	680.846	672.39	0.922986		11.4955	116	902.178	891.02	0.964531		11.4975	116	993.039	981.496	0.95321		11.4987	116	538.156	525.704	0.918024		11.5039	116	1633.45	1621.96	0.920292		11.4987	116
11.5986	117	1215.51	1207.14	0.924245		11.5996	117	854.264	843.89			11.5976	117	672.722	660.714			11.5976	117	689.937	681.481	0.935465		11.5944	117	925.029	913.871	0.989267		11.5974	117	991.882	980.339	0.952087		11.6006	117	530.47	518.018	0.904602		11.6057	117	1624.98	1613.49	0.915486		11.6006	117
11.6984	118	1188.93	1180.56	0.903893		11.7004	118	877.948	867.574			11.6984	118	652.606	640.598			11.6994	118	708.317	699.861	0.960695		11.6944	118	890.119	878.961	0.951477		11.6974	118	983.87	972.327	0.944306		11.7004	118	537.051	524.599	0.916095		11.7054	118	1652.12	1640.63	0.930884		11.7004	118
11.8002	119	1210.91	1202.54	0.92072		11.7992	119	862.152	851.778			11.7982	119	670.46	658.452			11.7992	119	665.681	657.225	0.902169		11.7954	119	876.615	865.457	0.936859		11.7954	119	991.943	980.4	0.952146		11.7982	119	528.857	516.405	0.901786		11.8051	119	1640.94	1629.45	0.924539		11.8002	119
11.8991	120	1203.67	1195.3	0.915182		11.8991	120	862.684	852.31			11.9001	120	668.746	656.738			11.8981	120	678.597	670.141	0.919898		11.8943	120	869.041	857.883	0.92866		11.8953	120	998.107	986.564	0.958132		11.9001	120	526.399	513.947	0.897493		11.9059	120	1644.28	1632.79	0.926433		11.8991	120
12.0009	121	1203.87	1195.5	0.915332		11.9989	121	867.436	857.062			11.9999	121	656.602	644.594			11.9999	121	685.345	676.889	0.929161		11.9943	121	890.138	878.98	0.951498		11.9973	121	986.102	974.559	0.946473		11.9989	121	539.691	527.239	0.920705		12.0036	121	1646.23	1634.74	0.927542		11.9989	121
12.0988	122	1206.7	1198.33	0.917499		12.0998	122	872.744	862.37			12.0978	122	663.134	651.126			12.0978	122	677.508	669.052	0.918404		12.0942	122	887.742	876.584	0.948904		12.0962	122	1013.39	1001.84	0.972972		12.1008	122	540.826	528.374	0.922687		12.1043	122	1634.81	1623.32	0.921064		12.1008	122
12.1986	123	1194.3	1185.93	0.908004		12.2006	123	877.006	866.632			12.1986	123	676	663.992			12.1996	123	670.292	661.836	0.908498		12.1942	123	875.752	864.594	0.935925		12.1962	123	1008.56	997.021	0.968288		12.1986	123	532.119	519.667	0.907482		12.2061	123	1637.52	1626.03	0.922597		12.1996	123
12.3005	124	1191.11	1182.74	0.905561		12.2995	124	862.307	851.933			12.2985	124	669.204	657.196			12.2985	124	683.648	675.192	0.926832		12.2961	124	863.857	852.699	0.923048		12.2961	124	982.41	970.867	0.942888		12.2985	124	519.492	507.04	0.885432		12.3038	124	1656.85	1645.36	0.933567		12.3005	124
12.3993	125	1205.09	1196.72	0.916268		12.3993	125	881.418	871.044			12.4003	125	675.457	663.449			12.3983	125	677.279	668.823	0.918089		12.3941	125	877.441	866.283	0.937753		12.3961	125	1004.6	993.06	0.964441		12.3993	125	539.373	526.921	0.920149		12.4055	125	1642.05	1630.56	0.92517		12.3993	125
12.4992	126	1203.2	1194.83	0.914819		12.4992	126	856.237	845.863			12.4982	126	661.323	649.315			12.4982	126	687.715	679.259	0.932415		12.4941	126	875.524	864.366	0.935678		12.4961	126	992.718	981.175	0.952899		12.4992	126	528.983	516.531	0.902006		12.5043	126	1634.47	1622.98	0.920867		12.4992	126
12.599	127	1199.64	1191.26	0.912091		12.6	127	858.682	848.308			12.598	127	666.193	654.185			12.598	127	689.047	680.591	0.934243		12.594	127	874.115	862.957	0.934153		12.596	127	985.788	974.245	0.946168		12.601	127	534.296	521.844	0.911284		12.604	127	1680.74	1669.25	0.947123		12.599	127
12.6989	128	1202.19	1193.82	0.914045		12.6999	128	839.789	829.415			12.6989	128	669.046	657.038			12.6989	128	695.643	687.187	0.943297		12.695	128	871.477	860.319	0.931297		12.698	128	980.021	968.478	0.940568		12.6989	128	539.62	527.168	0.920581		12.7038	128	1617.11	1605.62	0.911019		12.6989	128
12.7997	129	1177.02	1168.64	0.894771		12.7997	129	872.566	862.192			12.7987	129	679.513	667.505			12.7987	129	701.547	693.091	0.951402		12.7949	129	874.589	863.431	0.934666		12.7959	129	994.01	982.467	0.954153		12.7987	129	532.321	519.869	0.907835		12.8045	129	1658.56	1647.07	0.934539		12.7997	129
12.8996	130	1173.1	1164.72	0.891769		12.8996	130	859.748	849.374			12.9006	130	687.9	675.892			12.8986	130	690.668	682.212	0.936468		12.8949	130	865.139	853.981	0.924436		12.8959	130	976.582	965.039	0.937228		12.9006	130	538.875	526.423	0.91928		12.9042	130	1641.27	1629.78	0.924729		12.8996	130
12.9994	131	1158.1	1149.73	0.880287		12.9994	131	888.154	877.78			12.9984	131	683.271	671.263			12.9984	131	699.555	691.099	0.948667		12.9948	131	869.293	858.135	0.928933		12.9958	131	1000.16	988.617	0.960126		12.9994	131	542.544	530.092	0.925687		13.004	131	1672.95	1661.46	0.942704		12.9994	131
13.0992	132	1191.57	1183.2	0.905915		13.1002	132	871.614	861.24			13.0982	132	693.774	681.766			13.0982	132	695.508	687.052	0.943112		13.0948	132	866.615	855.457	0.926034		13.0958	132	985.438	973.895	0.945828		13.1012	132	530.236	517.784	0.904194		13.1047	132	1692.07	1680.58	0.953551		13.0992	132
13.1991	133	1194.89	1186.52	0.908458		13.2001	133	868.559	858.185			13.1981	133	678.348	666.34			13.1991	133	678.064	669.608	0.919167		13.1948	133	850.563	839.405	0.908658		13.1968	133	995.251	983.708	0.955359		13.1991	133	543.497	531.045	0.927351		13.2044	133	1661.5	1650.01	0.936207		13.1991	133
13.2999	134	1168.77	1160.39	0.888456		13.2999	134	878.216	867.842			13.2989	134	670.313	658.305			13.2989	134	693.126	684.67	0.939842		13.2947	134	871.802	860.644	0.931649		13.2967	134	989.55	978.007	0.949822		13.2989	134	528.078	515.626	0.900425		13.3042	134	1724.91	1713.42	0.972186		13.2999	134
13.3998	135	1192.77	1184.39	0.90683		13.3998	135	896.137	885.763			13.3988	135	668.851	656.843			13.3988	135	683.089	674.633	0.926065		13.3947	135	878.659	867.501	0.939071		13.3967	135	983.15	971.607	0.943606		13.3998	135	547.387	534.935	0.934144		13.4049	135	1674.74	1663.25	0.943719		13.3998	135
13.4996	136	1159	1150.63	0.880976		13.4996	136	899.598	889.224			13.4986	136	682.926	670.918			13.4986	136	707.044	698.588	0.958947		13.4946	136	906.867	895.709	0.969607		13.4966	136	990.088	978.545	0.950344		13.4996	136	539.116	526.664	0.919701		13.5046	136	1712.95	1701.46	0.965397		13.4996	136
13.5995	137	1168.23	1159.85	0.888042		13.5995	137	878.151	867.777			13.5985	137	697.048	685.04			13.5985	137	668.466	660.01	0.905992		13.5946	137	890.653	879.495	0.952055		13.5966	137	1008.2	996.654	0.967932		13.5995	137	534.998	522.546	0.912509		13.6044	137	1697.32	1685.83	0.956532		13.5995	137
13.6993	138	1155.33	1146.96	0.878166		13.7003	138	887.265	876.891			13.6983	138	685.121	673.113			13.6993	138	696.4	687.944	0.944336		13.6945	138	877.345	866.187	0.937649		13.6965	138	1014.29	1002.75	0.973854		13.6993	138	538.65	526.198	0.918887		13.7041	138	1729.42	1717.93	0.974746		13.6993	138
13.8002	139	1169.39	1161.02	0.888933		13.8002	139	880.976	870.602			13.7992	139	674.999	662.991			13.7992	139	696.009	687.553	0.9438		13.7955	139	875.867	864.709	0.936049		13.7965	139	1026.98	1015.43	0.98617		13.7992	139	544.233	531.781	0.928636		13.8049	139	1701.14	1689.65	0.958699		13.8002	139
13.9	140	1182.06	1173.68	0.89863		13.9	140	914.924	904.55			13.899	140	674.354	662.346			13.899	140	672.476	664.02	0.911496		13.8954	140	882.062	870.904	0.942755		13.8965	140	983.399	971.856	0.943848		13.9	140	528.264	515.812	0.90075		13.9046	140	1719.44	1707.95	0.969079		13.9	140
13.9999	141	1156.08	1147.71	0.878743		13.9999	141	913.273	902.899			13.9989	141	688.549	676.541			13.9989	141	681.659	673.203	0.924102		13.9954	141	900.674	889.516	0.962903		13.9964	141	989.869	978.326	0.950132		13.9999	141	546.924	534.472	0.933336		14.0043	141	1713.7	1702.21	0.965823		13.9999	141
14.0997	142	1174	1165.63	0.892461		14.0997	142	905.666	895.292			14.0987	142	673.338	661.33			14.0987	142	678.518	670.062	0.91979		14.0954	142	881.746	870.588	0.942413		14.0964	142	999.899	988.356	0.959873		14.0997	142	543.342	530.89	0.92708		14.1051	142	1724.9	1713.41	0.972179		14.0997	142
14.1996	143	1192.6	1184.23	0.906705		14.2006	143	911.953	901.579			14.1986	143	690.955	678.947			14.1996	143	699.549	691.093	0.948659		14.1933	143	890.455	879.297	0.951841		14.1963	143	986.595	975.052	0.946952		14.1996	143	534.058	521.606	0.910868		14.2048	143	1706.09	1694.6	0.961504		14.1996	143
14.3004	144	1177.08	1168.71	0.89482		14.3004	144	907.808	897.434			14.2994	144	690.696	678.688			14.2994	144	663.665	655.209	0.899401		14.2953	144	892.615	881.457	0.954179		14.2963	144	972.278	960.735	0.933048		14.2984	144	538.779	526.327	0.919112		14.3045	144	1735.73	1724.24	0.978326		14.3004	144
14.3983	145	1173.81	1165.43	0.892313		14.4003	145	911.913	901.539			14.3993	145	690.122	678.114			14.3993	145	696.868	688.412	0.944979		14.3932	145	899.088	887.93	0.961186		14.3972	145	1002.07	990.525	0.961979		14.3993	145	529.181	516.729	0.902351		14.4053	145	1719.99	1708.5	0.969391		14.4003	145
14.5001	146	1184.02	1175.65	0.900133		14.5001	146	909.989	899.615			14.4991	146	672.168	660.16			14.4991	146	688.348	679.892	0.933284		14.4952	146	888.38	877.222	0.949594		14.4972	146	982.039	970.496	0.942527		14.5001	146	540.653	528.201	0.922385		14.505	146	1711.17	1699.68	0.964388		14.4981	146
14.5999	147	1178.44	1170.07	0.895864		14.5989	147	902.374	892			14.5979	147	708.321	696.313			14.5989	147	688.205	679.749	0.933087		14.5951	147	902.771	891.613	0.965173		14.5971	147	1009.41	997.864	0.969107		14.5999	147	552.182	539.73	0.942517		14.6047	147	1716.57	1705.08	0.967455		14.5999	147
14.6988	148	1180.91	1172.53	0.897749		14.7008	148	912.729	902.355			14.6988	148	695.649	683.641			14.6988	148	671.333	662.877	0.909927		14.6941	148	881.527	870.369	0.942176		14.6971	148	1011.5	999.952	0.971135		14.6998	148	530.215	517.763	0.904157		14.7055	148	1674.65	1663.16	0.943667		14.6988	148
14.8006	149	1204.9	1196.52	0.916118		14.8006	149	924.336	913.962			14.7996	149	705.684	693.676			14.7996	149	681.516	673.06	0.923905		14.7951	149	876.51	865.352	0.936745		14.7971	149	1001.54	989.994	0.961464		14.7986	149	546.945	534.493	0.933372		14.8052	149	1649.83	1638.34	0.929583		14.8006	149
14.8985	150	1164.32	1155.95	0.88505		14.9005	150	899.358	888.984			14.8995	150	680.489	668.481			14.8995	150	683.126	674.67	0.926115		14.895	150	894.697	883.539	0.956433		14.895	150	996.558	985.015	0.956628		14.8995	150	534.08	521.628	0.910906		14.905	150	1695.55	1684.06	0.955528		14.9005	150
15.0003	151	1186.15	1177.78	0.901764		14.9993	151	911.69	901.316			14.9993	151	692.943	680.935			14.9993	151	694.836	686.38	0.94219		14.996	151	882.186	871.028	0.942889		14.997	151	980.439	968.896	0.940974		15.0003	151	532.627	520.175	0.908369		15.0047	151	1669.5	1658.01	0.940747		14.9983	151
15.1002	152	1187.07	1178.69	0.902467		15.0992	152	892.535	882.161			15.0982	152	694.182	682.174			15.0982	152	681.497	673.041	0.923879		15.0959	152	890.018	878.86	0.951368		15.0959	152	976.701	965.158	0.937343		15.1002	152	532.624	520.172	0.908364		15.1054	152	1683.15	1671.66	0.948488		15.1002	152
15.199	153	1175.21	1166.84	0.89339		15.201	153	908.96	898.586			15.199	153	699.069	687.061			15.199	153	688.803	680.347	0.933908		15.1939	153	901.219	890.061	0.963493		15.1969	153	999.647	988.104	0.959628		15.2	153	539.857	527.405	0.920995		15.2052	153	1696.85	1685.36	0.956265		15.199	153
15.3009	154	1191.7	1183.33	0.906016		15.2989	154	901.042	890.668			15.2999	154	707.115	695.107			15.2999	154	680.914	672.458	0.923079		15.2958	154	879.509	868.351	0.939992		15.2968	154	986.645	975.102	0.947001		15.2989	154	534.265	521.813	0.911229		15.3049	154	1663.4	1651.91	0.937286		15.3009	154
15.3987	155	1182.51	1174.13	0.898974		15.4007	155	899.779	889.405			15.3997	155	685.536	673.528			15.3977	155	691.66	683.204	0.93783		15.3958	155	895.267	884.109	0.95705		15.3958	155	1016.15	1004.61	0.975657		15.3997	155	541.445	528.993	0.923768		15.4056	155	1704.27	1692.78	0.960471		15.4007	155
15.5006	156	1170.34	1161.97	0.889662		15.4996	156	906.963	896.589			15.4996	156	693.434	681.426			15.4996	156	681.604	673.148	0.924026		15.4958	156	878.038	866.88	0.938399		15.4968	156	1039.8	1028.26	0.998624		15.4986	156	549.106	536.654	0.937146		15.5054	156	1713.89	1702.4	0.965932		15.4986	156
15.5984	157	1196.31	1187.94	0.909543		15.5994	157	900.738	890.364			15.5994	157	678.158	666.15			15.5984	157	688.641	680.185	0.933686		15.5937	157	889.184	878.026	0.950465		15.5957	157	997.705	986.162	0.957742		15.6004	157	553.97	541.518	0.94564		15.6041	157	1702.29	1690.8	0.959351		15.6004	157
15.6993	158	1183.53	1175.15	0.899755		15.7013	158	924.392	914.018			15.6983	158	684.783	672.775			15.6993	158	689.719	681.263	0.935165		15.6947	158	880.154	868.996	0.94069		15.6977	158	983.271	971.728	0.943724		15.6983	158	540.393	527.941	0.921931		15.7058	158	1705.15	1693.66	0.960974		15.6993	158
15.7991	159	1174.87	1166.5	0.893129		15.7991	159	918.007	907.633			15.7981	159	681.177	669.169			15.8001	159	689.671	681.215	0.9351		15.7946	159	869.628	858.47	0.929295		15.7956	159	973.325	961.782	0.934065		15.7991	159	545.036	532.584	0.930039		15.8036	159	1701.28	1689.79	0.958777		15.8011	159
15.8989	160	1200.34	1191.96	0.912624		15.8989	160	923.282	912.908			15.8999	160	699.935	687.927			15.8999	160	679.628	671.172	0.921314		15.8946	160	886.773	875.615	0.947855		15.8956	160	1005.79	994.252	0.965599		15.8989	160	538.634	526.182	0.918859		15.9053	160	1675.67	1664.18	0.944245		15.8989	160
16.0008	161	1175.36	1166.99	0.893505		15.9998	161	895.154	884.78			15.9978	161	689.732	677.724			15.9998	161	674.116	665.66	0.913747		15.9955	161	868.346	857.188	0.927908		15.9975	161	978.962	967.419	0.939539		15.9988	161	551.792	539.34	0.941836		16.004	161	1694.51	1683.02	0.954933		15.9988	161
16.0986	162	1159.17	1150.79	0.881103		16.0996	162	872.868	862.494			16.0986	162	705.794	693.786			16.0986	162	689.189	680.733	0.934438		16.0945	162	847.962	836.804	0.905842		16.0955	162	977.302	965.759	0.937927		16.1006	162	528.718	516.266	0.901543		16.1038	162	1704.29	1692.8	0.960482		16.1006	162
16.1995	163	1214.77	1206.39	0.923674		16.1995	163	892.489	882.115			16.1985	163	698.578	686.57			16.1985	163	702.706	694.25	0.952993		16.1945	163	850.462	839.304	0.908548		16.1975	163	1008	996.455	0.967738		16.2005	163	536.543	524.091	0.915207		16.2045	163	1706.29	1694.8	0.961621		16.1995	163
16.3003	164	1188.09	1179.71	0.903247		16.2993	164	900.971	890.597			16.2983	164	702.435	690.427			16.3003	164	671.213	662.757	0.909762		16.2944	164	875.48	864.322	0.93563		16.2964	164	992.691	981.148	0.952872		16.2993	164	538.325	525.873	0.918319		16.3043	164	1725.35	1713.86	0.972436		16.3013	164
16.3992	165	1201.33	1192.95	0.913383		16.3992	165	901.205	890.831			16.4002	165	677.316	665.308			16.3982	165	688	679.544	0.932806		16.3944	165	867.82	856.662	0.927338		16.3964	165	989.271	977.728	0.949551		16.3992	165	539.542	527.09	0.920445		16.404	165	1732.22	1720.73	0.976334		16.3992	165
16.499	166	1185.45	1177.07	0.901226		16.5	166	910.372	899.998			16.498	166	678.794	666.786			16.5	166	701.534	693.078	0.951384		16.4943	166	872.794	861.636	0.932723		16.4973	166	979.03	967.487	0.939605		16.499	166	553.43	540.978	0.944697		16.5057	166	1739	1727.51	0.980181		16.499	166
16.5989	167	1231.31	1222.93	0.936337		16.5999	167	905.227	894.853			16.5989	167	701.168	689.16			16.5989	167	697.219	688.763	0.945461		16.5943	167	865.105	853.947	0.924399		16.5963	167	967.732	956.189	0.928633		16.5989	167	534.292	521.84	0.911277		16.6045	167	1757.05	1745.56	0.990421		16.5999	167
16.6997	168	1197.74	1189.37	0.910637		16.6997	168	915.644	905.27			16.6987	168	687.336	675.328			16.6987	168	682.628	674.172	0.925432		16.6942	168	859.028	847.87	0.917821		16.6962	168	972.644	961.101	0.933403		16.6987	168	545.327	532.875	0.930547		16.7042	168	1732.18	1720.69	0.97631		16.6997	168
16.7996	169	1178.91	1170.54	0.896224		16.7996	169	919.589	909.215			16.7986	169	679.423	667.415			16.7986	169	687.438	678.982	0.932034		16.7942	169	870.41	859.252	0.930142		16.7962	169	984.206	972.663	0.944632		16.7996	169	541.591	529.139	0.924023		16.8039	169	1716.74	1705.25	0.967552		16.8016	169
16.8994	170	1196.37	1188	0.909591		16.8994	170	897.113	886.739			16.9004	170	675.086	663.078			16.8984	170	691.546	683.09	0.937673		16.8951	170	877.96	866.802	0.938315		16.8961	170	995.755	984.212	0.955848		16.8994	170	549.857	537.405	0.938457		16.9047	170	1727.51	1716.02	0.97366		16.8994	170
16.9993	171	1177.01	1168.64	0.894769		17.0003	171	917.199	906.825			16.9983	171	694.558	682.55			16.9983	171	676.522	668.066	0.91705		16.9951	171	866.016	854.858	0.925385		16.9961	171	967.024	955.481	0.927945		16.9993	171	560.506	548.054	0.957053		17.0044	171	1693.36	1681.87	0.954284		16.9993	171
17.0991	172	1191.72	1183.35	0.906031		17.1001	172	904.048	893.674			17.0981	172	678.178	666.17			17.0991	172	676.955	668.499	0.917644		17.0951	172	862.15	850.992	0.9212		17.0961	172	993.931	982.388	0.954077		17.0991	172	537.904	525.452	0.917584		17.1041	172	1711.97	1700.48	0.964843		17.0991	172
17.2	173	1187.51	1179.13	0.902803		17.2	173	930.637	920.263			17.1989	173	679.153	667.145			17.2	173	680.438	671.982	0.922426		17.195	173	857.823	846.665	0.916516		17.196	173	975.555	964.012	0.93623		17.1989	173	533.702	521.25	0.910246		17.2049	173	1681.37	1669.88	0.947478		17.2	173
17.2998	174	1193.47	1185.1	0.90737		17.2998	174	929.944	919.57			17.2988	174	702.116	690.108			17.2988	174	671.495	663.039	0.91015		17.295	174	884.002	872.844	0.944855		17.296	174	967.171	955.628	0.928088		17.2998	174	543.94	531.488	0.928125		17.3046	174	1669.44	1657.95	0.940713		17.2998	174
17.3996	175	1173.58	1165.21	0.892141		17.3996	175	914.023	903.649			17.3986	175	686.918	674.91			17.3986	175	688.17	679.714	0.933039		17.3949	175	873.9	862.742	0.93392		17.3959	175	992.592	981.049	0.952776		17.3996	175	526.295	513.843	0.897312		17.4064	175	1696.93	1685.44	0.956308		17.3996	175
17.4995	176	1190.61	1182.24	0.905179		-2171.2	176	920.37	909.996			17.4985	176	682.724	670.716			17.4985	176	698.921	690.465	0.947797		17.4949	176	876.321	865.163	0.936541		17.4969	176	994.671	983.128	0.954795		17.4995	176	543.746	531.294	0.927786		17.5041	176	1696.18	1684.69	0.955881		17.4995	176
17.5993	177	1209.24	1200.86	0.919439		17.6003	177	919.323	908.949			17.5983	177	693.292	681.284			17.5993	177	686.848	678.392	0.931224		17.5948	177	887.924	876.766	0.949101		17.5968	177	995.009	983.466	0.955124		17.5993	177	535.081	522.629	0.912654		17.6048	177	1677.36	1665.87	0.945202		17.5993	177
17.7002	178	1214.85	1206.48	0.92374		17.7002	178	914.072	903.698			17.6992	178	699.479	687.471			17.6992	178	674.824	666.368	0.914719		17.6948	178	888.158	877	0.949354		17.6968	178	987.493	975.95	0.947824		17.6992	178	541.165	528.713	0.923279		17.7046	178	1715.05	1703.56	0.96659		17.7002	178
17.8	179	1191.7	1183.33	0.906012		17.8	179	921.148	910.774			17.799	179	692.9	680.892			17.799	179	682.401	673.945	0.92512		17.7948	179	900.221	889.063	0.962412		17.7968	179	987.729	976.186	0.948053		17.8	179	537.814	525.362	0.917427		17.8043	179	1661.31	1649.82	0.936099		17.8	179
17.8999	180	1199.24	1190.86	0.911784		17.8999	180	903.462	893.088			17.8989	180	695.008	683			17.8989	180	683.129	674.673	0.926119		17.8947	180	902.67	891.512	0.965063		17.8967	180	981.698	970.155	0.942196		17.8999	180	540.298	527.846	0.921765		17.905	180	1717.82	1706.33	0.968161		17.8999	180
17.9997	181	1207.46	1199.09	0.91808		17.9997	181	912.633	902.259			17.9987	181	677.683	665.675			17.9987	181	682.853	674.397	0.925741		17.9947	181	873.648	862.49	0.933647		17.9967	181	967.889	956.346	0.928785		17.9997	181	543.332	530.88	0.927063		18.0048	181	1678.76	1667.27	0.946		17.9997	181
18.0996	182	1188.72	1180.34	0.903728		18.0986	182	888.393	878.019			18.0986	182	689.871	677.863			18.0996	182	697.909	689.453	0.946408		18.0956	182	872.602	861.444	0.932515		18.0966	182	981.925	970.382	0.942417		18.0996	182	546.491	534.039	0.932579		18.1045	182	1634.37	1622.88	0.920812		18.0996	182
18.2004	183	1162.17	1153.8	0.883407		18.2004	183	899.598	889.224			18.1994	183	687.983	675.975			18.1994	183	683.483	675.027	0.926605		18.1936	183	884.3	873.142	0.945178		18.1956	183	979.829	968.286	0.940381		18.1994	183	527.992	515.54	0.900275		18.2052	183	1674.92	1663.43	0.943823		18.2004	183
18.3003	184	1187.65	1179.27	0.902911		18.3003	184	903.468	893.094			18.2993	184	714.948	702.94			18.2993	184	677.019	668.563	0.917732		18.2955	184	887.988	876.83	0.94917		18.2965	184	973.808	962.265	0.934534		18.2983	184	533.914	521.462	0.910617		18.305	184	1646.55	1635.06	0.927721		18.3003	184
18.4001	185	1187.7	1179.33	0.90295		18.4001	185	920.748	910.374			18.3991	185	711.255	699.247			18.3971	185	685.03	676.574	0.928729		18.3935	185	876.755	865.597	0.93701		18.3965	185	985.624	974.081	0.946009		18.4001	185	554.486	542.034	0.946541		18.4047	185	1682.82	1671.33	0.948303		18.4001	185
18.5	186	1204.95	1196.58	0.916158		18.5	186	929.659	919.285			18.499	186	696.363	684.355			18.499	186	681.244	672.788	0.923532		18.4955	186	884.454	873.296	0.945345		18.4965	186	959.416	947.873	0.920556		18.5	186	536.66	524.208	0.915412		18.5055	186	1685.94	1674.45	0.950072		18.499	186
18.5998	187	1208	1199.63	0.918495		18.5988	187	933.159	922.785			18.5978	187	705.536	693.528			18.5988	187	682.209	673.753	0.924857		18.5954	187	894.591	883.433	0.956318		18.5974	187	972.372	960.829	0.933139		18.5998	187	529.026	516.574	0.902081		18.6032	187	1684.99	1673.5	0.949532		18.5998	187
18.6986	188	1199.2	1190.83	0.911755		18.7006	188	908.743	898.369			18.6996	188	694.397	682.389			18.6996	188	668.215	659.759	0.905647		18.6934	188	859.457	848.299	0.918285		18.6974	188	995.743	984.2	0.955837		18.6996	188	542.058	529.606	0.924838		18.7049	188	1711.15	1699.66	0.964377		18.6986	188
18.8005	189	1241.34	1232.97	0.94402		18.7985	189	914.525	904.151			18.7995	189	697.162	685.154			18.7995	189	674.83	666.374	0.914727		18.7953	189	864.111	852.953	0.923323		18.7973	189	983.759	972.216	0.944198		18.7995	189	543.487	531.035	0.927334		18.8047	189	1730.08	1718.59	0.975119		18.8005	189
18.9003	190	1209.27	1200.9	0.919466		18.9003	190	930.087	919.713			18.8993	190	692.786	680.778			18.8973	190	691.492	683.036	0.937599		18.8943	190	866.721	855.563	0.926149		18.8973	190	976.229	964.686	0.936885		18.9003	190	539.777	527.325	0.920855		18.9054	190	1717.68	1706.19	0.968081		18.8983	190
19.0002	191	1206.11	1197.73	0.917043		19.0002	191	943.539	933.165			18.9992	191	690.219	678.211			18.9992	191	681.435	672.979	0.923794		18.9952	191	872.058	860.9	0.931926		18.9972	191	972.157	960.614	0.93293		18.9982	191	549.896	537.444	0.938526		19.0051	191	1701.1	1689.61	0.958672		18.9992	191
19.1	192	1195.58	1187.21	0.908984		19.099	192	931.392	921.018			19.098	192	678.731	666.723			19.099	192	676.385	667.929	0.916862		19.0942	192	857.634	846.476	0.916312		19.0972	192	980.756	969.213	0.941281		19.1	192	541.852	529.4	0.924478		19.1039	192	1738.93	1727.44	0.98014		19.099	192
19.1989	193	1240.51	1232.13	0.943383		19.2009	193	900.054	889.68			19.1999	193	679.643	667.635			19.1999	193	703.711	695.255	0.954372		19.1942	193	876.161	865.003	0.936367		19.1972	193	980.638	969.095	0.941167		19.1999	193	540.755	528.303	0.922563		19.2056	193	1742.11	1730.62	0.981942		19.2009	193
19.3007	194	1197.57	1189.2	0.910507		19.2987	194	904.784	894.41			19.2977	194	662.62	650.612			19.2997	194	671.206	662.75	0.909753		19.2941	194	858.625	847.467	0.917385		19.2971	194	984.646	973.103	0.945059		19.2987	194	533.784	521.332	0.91039		19.3033	194	1727.16	1715.67	0.973463		19.3007	194
19.3986	195	1200.69	1192.31	0.912893		19.4006	195	906.64	896.266			19.3996	195	691.432	679.424			19.3976	195	678.514	670.058	0.919784		19.3941	195	863.349	852.191	0.922498		19.3961	195	986.845	975.302	0.947195		19.4006	195	520.237	507.785	0.886733		19.4051	195	1691.44	1679.95	0.953195		19.3986	195
19.5004	196	1206.63	1198.25	0.917442		19.4994	196	928.276	917.902			19.4984	196	686.954	674.946			19.4994	196	688.03	679.574	0.932847		19.496	196	878.659	867.501	0.939071		19.497	196	978.518	966.975	0.939108		19.4984	196	534.379	521.927	0.911429		19.5058	196	1718.47	1706.98	0.968532		19.4994	196
19.6003	197	1175.05	1166.67	0.893263		19.5993	197	939.106	928.732			19.5983	197	667.421	655.413			19.5983	197	676.922	668.466	0.917599		19.596	197	855.611	844.453	0.914122		19.596	197	981.788	970.245	0.942284		19.6003	197	539.211	526.759	0.919867		19.6035	197	1740.58	1729.09	0.981076		19.6003	197
19.6991	198	1217.21	1208.83	0.925542		19.7011	198	926.674	916.3			19.7001	198	668.653	656.645			19.7001	198	691.938	683.482	0.938211		19.6939	198	875.297	864.139	0.935432		19.6969	198	992.294	980.751	0.952487		19.6991	198	531.431	518.979	0.906281		19.7043	198	1758.37	1746.88	0.991167		19.6991	198
19.799	199	1199.33	1190.95	0.911852		19.799	199	929.097	918.723			19.798	199	690.838	678.83			19.798	199	694.741	686.285	0.942059		19.7939	199	849.573	838.415	0.907586		19.7979	199	971.507	959.964	0.932299		19.799	199	530.039	517.587	0.90385		19.804	199	1758.04	1746.55	0.99098		19.801	199
19.8988	200	1198.98	1190.61	0.911588		19.9008	200	936.434	926.06			19.8998	200	673.112	661.104			19.8978	200	693.242	684.786	0.940001		19.8938	200	890.615	879.457	0.952014		19.8958	200	994.045	982.502	0.954187		19.8988	200	547.232	534.78	0.933873		19.9058	200	1755.45	1743.96	0.989514		19.8988	200
[truncated: 12 more columns]

## Sheet: CSA No UV
Cell 00						Cell 01						Cell 02						Cell 03						Cell 04						Cell 05						Cell 06						Cell 07						Cell 08
	paste BG		average pre-bleach				paste BG		average pre-bleach				paste BG		average pre-bleach				paste BG		average pre-bleach				paste BG		average pre-bleach				paste BG		average pre-bleach				paste BG		average pre-bleach				paste BG		average pre-bleach				paste BG
	1	6.959	708.46				1	7.964	513.18				1	7.131	264.279				1	12.931	309.198				1	9.98	139.083				1	6.835	151.48				1	8.67	203.054				1	7.993	180.414				1
	paste FRAP	RAW					paste FRAP	RAW					paste FRAP	RAW					paste FRAP	RAW					paste FRAP	RAW					paste FRAP	RAW					paste FRAP	RAW					paste FRAP	RAW					paste FRAP
Time	data here		minus BG	Normalized		Time	data here		minus BG	Normalized		Time	data here		minus BG	Normalized		Time	data here		minus BG	Normalized		Time	data here		minus BG	Normalized		Time	data here		minus BG	Normalized		Time	data here		minus BG	Normalized		Time	data here		minus BG	Normalized		Time	data here
0	1	766.813	759.854	1.07254		0	1	560.328	552.364	1.07636		0	1	287.371	280.24	1.0604		0	1	363.808	350.877	1.1348		0	1	153.202	143.222	1.02976		0	1	174.891	168.056	1.10943		0	1	223.456	214.786	1.05778		0	1	215.174	207.181	1.14836		0	1
0.0798342	2	750.405	743.446	1.04938		0.0798342	2	556.539	548.575	1.06897		0.0779433	2	286.025	278.894	1.0553		0.0798342	2	347.715	334.784	1.08275		0.0798342	2	152.892	142.912	1.02753		0.0798342	2	163.365	156.53	1.03334		0.0798342	2	217.304	208.634	1.02748		0.0798342	2	199.382	191.389	1.06083		0.0798342	2
0.171676	3	759.472	752.513	1.06218		0.171676	3	552.195	544.231	1.06051		0.171896	3	284.504	277.373	1.04955		0.171676	3	346.947	334.016	1.08027		0.171676	3	161.085	151.105	1.08644		0.170675	3	154.963	148.128	0.977874		0.171676	3	220.797	212.127	1.04468		0.171676	3	190.137	182.144	1.00959		0.170675	3
0.271522	4	734.767	727.808	1.02731		0.271522	4	558.148	550.184	1.07211		0.269852	4	288.646	281.515	1.06522		0.271522	4	338.691	325.76	1.05356		0.271522	4	156.954	146.974	1.05674		0.271522	4	159.376	152.541	1.00701		0.271522	4	221.712	213.042	1.04919		0.272523	4	205.769	197.776	1.09623		0.270521	4
0.371368	5	730.571	723.612	1.02139		0.371368	5	563.798	555.834	1.08312		0.369808	5	284.409	277.278	1.04919		0.371368	5	323.985	311.054	1.006		0.371368	5	148.735	138.755	0.997642		0.371368	5	152.479	145.644	0.961476		0.371368	5	222.438	213.768	1.05277		0.372369	5	197.42	189.427	1.04996		0.370368	5
0.471215	6	750.203	743.244	1.0491		0.472215	6	543.836	535.872	1.04422		0.469765	6	279.879	272.748	1.03205		0.471215	6	341.991	329.06	1.06424		0.471215	6	149.799	139.819	1.00529		0.471215	6	159.653	152.818	1.00884		0.471215	6	211.833	203.163	1.00054		0.472215	6	196.917	188.924	1.04717		0.472215	6
0.571061	7	718.001	711.042	1.00364		0.572061	7	544.803	536.839	1.0461		0.569721	7	274.868	267.737	1.01309		0.572061	7	328.111	315.18	1.01935		0.572061	7	149.661	139.681	1.0043		0.573062	7	161.126	154.291	1.01856		0.571061	7	219.636	210.966	1.03897		0.572061	7	193.157	185.164	1.02633		0.571061	7
0.671908	8	728.111	721.152	1.01791		0.671908	8	538.565	530.601	1.03395		0.670679	8	280.462	273.331	1.03425		0.671908	8	336.71	323.779	1.04716		0.671908	8	147.31	137.33	0.987396		0.670907	8	155.76	148.925	0.983136		0.671908	8	220.082	211.412	1.04116		0.671908	8	198.52	190.527	1.05605		0.670907	8
0.771754	9	717.635	710.676	1.00313		0.771754	9	519.387	511.423	0.996576		0.770635	9	282.741	275.61	1.04288		0.771754	9	336.142	323.211	1.04532		0.771754	9	145.866	135.886	0.977014		0.771754	9	157.531	150.696	0.994827		0.771754	9	213.067	204.397	1.00662		0.772755	9	186.809	178.816	0.991141		0.770753	9
0.8716	10	726.777	719.818	1.01603		0.8716	10	533.77	525.806	1.0246		0.870592	10	272.492	265.361	1.0041		0.8716	10	318.06	305.129	0.98684		0.8716	10	148.935	138.955	0.99908		0.8716	10	162.269	155.434	1.02611		0.8716	10	211.592	202.922	0.999352		0.8706	10	183.198	175.205	0.971126		0.8706	10
0.971447	11	709.542	702.583	0.991704		0.972447	11	511.259	503.295	0.980738		0.970548	11	275.544	268.413	1.01564		0.971447	11	321.278	308.347	0.997248		0.971447	11	149.917	139.937	1.00614		0.971447	11	149.95	143.115	0.944781		0.971447	11	210.367	201.697	0.993319		0.972447	11	193.033	185.04	1.02564		0.972447	11
1.07129	12	725.051	718.092	1.0136		1.07229	12	525.623	517.659	1.00873		1.07051	12	271.498	264.367	1.00033		1.07229	12	335.818	322.887	1.04427		1.07129	12	146.692	136.712	0.982953		1.07129	12	162.567	155.732	1.02807		1.07129	12	210.752	202.082	0.995215		1.07229	12	183.474	175.481	0.972656		1.07129	12
1.17214	13	689.414	682.455	0.963293		1.17214	13	514.747	506.783	0.987535		1.17246	13	267.898	260.767	0.986712		1.17214	13	327.672	314.741	1.01793		1.17214	13	150.34	140.36	1.00918		1.17114	13	156.807	149.972	0.990048		1.17114	13	213.546	204.876	1.00897		1.17214	13	193.627	185.634	1.02893		1.17114	13
1.27199	14	692.754	685.795	0.968008		1.27199	14	529.775	521.811	1.01682		1.27042	14	276.695	269.564	1.02		1.27199	14	315.433	302.502	0.978344		1.27199	14	151.459	141.479	1.01723		1.27199	14	160.11	153.275	1.01185		1.27199	14	197.02	188.35	0.927588		1.27199	14	189.837	181.844	1.00792		1.27099	14
1.37183	15	720.493	713.534	1.00716		1.37183	15	521.395	513.431	1.00049		1.37037	15	277.095	269.964	1.02151		1.37183	15	330.781	317.85	1.02798		1.37183	15	153.89	143.91	1.03471		1.37183	15	159.923	153.088	1.01062		1.37183	15	215.033	206.363	1.0163		1.37083	15	186.269	178.276	0.988148		1.37083	15
1.47168	16	725.045	718.086	1.01359		1.47168	16	526.113	518.149	1.00968		1.47033	16	272.459	265.328	1.00397		1.47168	16	321.35	308.419	0.997481		1.47168	16	148.427	138.447	0.995427		1.47168	16	159.724	152.889	1.0093		1.47168	16	211.922	203.252	1.00098		1.47268	16	186.033	178.04	0.98684		1.47068	16
1.57153	17	736.545	729.586	1.02982		1.57253	17	516.126	508.162	0.990222		1.57029	17	271.585	264.454	1.00066		1.57253	17	305.333	292.402	0.945679		1.57153	17	148.516	138.536	0.996067		1.57153	17	163.552	156.717	1.03457		1.57153	17	217.919	209.249	1.03051		1.57253	17	187.51	179.517	0.995026		1.57153	17
1.67237	18	734.443	727.484	1.02685		1.67237	18	518.127	510.163	0.994121		1.67024	18	270.982	263.851	0.998382		1.67237	18	318.398	305.467	0.987934		1.67237	18	145.731	135.751	0.976043		1.67137	18	161.777	154.942	1.02286		1.67137	18	211.655	202.985	0.999662		1.67237	18	188.879	180.886	1.00261		1.67137	18
1.77222	19	723.268	716.309	1.01108		1.77022	19	516.895	508.931	0.99172		1.7702	19	266.376	259.245	0.980953		1.77222	19	324.143	311.212	1.00651		1.77022	19	147.208	137.228	0.986663		1.77222	19	153.428	146.593	0.967741		1.77222	19	212.135	203.465	1.00203		1.77122	19	189.04	181.047	1.00351		1.77122	19
1.87206	20	697.637	690.678	0.9749		1.87206	20	531.38	523.416	1.01995		1.87116	20	263.965	256.834	0.97183		1.87206	20	321.083	308.152	0.996617		1.87206	20	148.45	138.47	0.995593		1.87206	20	155.308	148.473	0.980152		1.87206	20	216.887	208.217	1.02543		1.87106	20	186.371	178.378	0.988713		1.87106	20
2.03132	21	462.391	455.432	0.642848		2.03132	21	354.37	346.406	0.675019		2.02663	21	172.592	165.461	0.626085		2.03132	21	215.577	202.646	0.655393		2.03132	21	100.184	90.204	0.648562		2.03132	21	104.227	97.392	0.642938		2.03132	21	143.63	134.96	0.664652		2.03032	21	126.895	118.902	0.65905		2.03032	21
2.11115	22	509.46	502.501	0.709286		2.11115	22	379.089	371.125	0.723187		2.10457	22	203.389	196.258	0.742618		2.11115	22	228.213	215.282	0.69626		2.11115	22	108.212	98.232	0.706283		2.11115	22	111.805	104.97	0.692965		2.11115	22	166.183	157.513	0.775721		2.11015	22	128.792	120.799	0.669564		2.11015	22
2.19799	23	518.335	511.376	0.721813		2.19799	23	392.667	384.703	0.749645		2.19452	23	206.067	198.936	0.752751		2.19999	23	245.514	232.583	0.752214		2.19799	23	114.585	104.605	0.752105		2.20099	23	114.866	108.031	0.713172		2.19899	23	166.563	157.893	0.777593		2.19899	23	140.442	132.449	0.734138		2.19899	23
2.29984	24	569.816	562.857	0.794479		2.29984	24	422.949	414.985	0.808654		2.29548	24	210.469	203.338	0.769407		2.29984	24	244.29	231.359	0.748255		2.29984	24	121.086	111.106	0.798847		2.30084	24	125.453	118.618	0.783063		2.29984	24	171.28	162.61	0.800823		2.29884	24	148.819	140.826	0.78057		2.29884	24
2.39968	25	550.605	543.646	0.767363		2.39968	25	419.571	411.607	0.802071		2.39544	25	214.473	207.342	0.784558		2.39968	25	260.344	247.413	0.800177		2.39968	25	125.594	115.614	0.831259		2.40068	25	124.989	118.154	0.779999		2.39968	25	176.276	167.606	0.825427		2.39868	25	160.016	152.023	0.842633		2.39868	25
2.49953	26	575.935	568.976	0.803116		2.49853	26	429.564	421.6	0.821544		2.49539	26	212.939	205.808	0.778754		2.49953	26	256.503	243.572	0.787754		2.49953	26	121.629	111.649	0.802751		2.50153	26	127.042	120.207	0.793552		2.49953	26	168.67	160	0.787969		2.49853	26	154.153	146.16	0.810135		2.49753	26
2.59938	27	583.291	576.332	0.813499		2.60038	27	438.156	430.192	0.838287		2.59535	27	227.95	220.819	0.835554		2.60038	27	267.619	254.688	0.823705		2.59938	27	130.249	120.269	0.864728		2.60138	27	120.847	114.012	0.752656		2.59838	27	173.694	165.024	0.812712		2.59838	27	162.706	154.713	0.857543		2.59938	27
2.70022	28	581.677	574.718	0.811221		2.69822	28	436.74	428.776	0.835527		2.69331	28	219.345	212.214	0.802993		2.70022	28	274.436	261.505	0.845753		2.70022	28	119.37	109.39	0.786509		2.70122	28	122.331	115.496	0.762453		2.69922	28	180.703	172.033	0.847229		2.69922	28	157.737	149.744	0.830001		2.69922	28
2.80007	29	593.033	586.074	0.82725		2.80007	29	434.758	426.794	0.831665		2.79526	29	216.256	209.125	0.791305		2.80007	29	267.977	255.046	0.824863		2.80007	29	119.617	109.637	0.788285		2.80107	29	122.624	115.789	0.764387		2.80007	29	185.566	176.896	0.871179		2.79707	29	154.563	146.57	0.812408		2.79907	29
2.89791	30	596.192	589.233	0.831709		2.89992	30	433.693	425.729	0.82959		2.89522	30	225.32	218.189	0.825602		2.89992	30	278.56	265.629	0.859091		2.89791	30	124.567	114.587	0.823875		2.90092	30	133.314	126.479	0.834957		2.89791	30	178.89	170.22	0.838301		2.89891	30	164.369	156.376	0.866761		2.89891	30
2.99976	31	600.068	593.109	0.83718		2.99876	31	428.621	420.657	0.819707		2.99518	31	220.409	213.278	0.807019		2.99976	31	281.126	268.195	0.867389		2.99976	31	129.213	119.233	0.857279		2.99976	31	129.084	122.249	0.807033		2.99976	31	189.218	180.548	0.889164		2.99876	31	159.057	151.064	0.837317		2.99776	31
3.09961	32	609.385	602.426	0.850331		3.09861	32	437.18	429.216	0.836385		3.09513	32	228.778	221.647	0.838687		3.10061	32	267.628	254.697	0.823735		3.09961	32	130.315	120.335	0.865203		3.10161	32	130.489	123.654	0.816308		3.09861	32	184.356	175.686	0.86522		3.09761	32	162.38	154.387	0.855736		3.09961	32
3.20046	33	603.79	596.831	0.842434		3.19845	33	438.942	430.978	0.839818		3.19409	33	223.807	216.676	0.819877		3.20046	33	282.215	269.284	0.870911		3.19845	33	125.185	115.205	0.828318		3.19945	33	135.171	128.336	0.847216		3.19945	33	188.661	179.991	0.886421		3.19945	33	163.393	155.4	0.861351		3.19945	33
3.2983	34	603.559	596.6	0.842108		3.3003	34	434.393	426.429	0.830954		3.29505	34	224.233	217.102	0.821489		3.3003	34	286.538	273.607	0.884893		3.3003	34	127.395	117.415	0.844208		3.3013	34	139.944	133.109	0.878726		3.3003	34	179.224	170.554	0.839946		3.2993	34	165.071	157.078	0.870652		3.2993	34
3.39815	35	590.44	583.481	0.82359		3.39915	35	436.452	428.488	0.834966		3.394	35	227.245	220.114	0.832886		3.39915	35	281.96	269.029	0.870087		3.39815	35	124.41	114.43	0.822746		3.40115	35	128.698	121.863	0.804485		3.39815	35	187.733	179.063	0.881851		3.39915	35	159.46	151.467	0.839551		3.39815	35
3.49999	36	635.623	628.664	0.887367		3.49899	36	458.521	450.557	0.877971		3.49596	36	226.856	219.725	0.831414		3.49999	36	282.08	269.149	0.870475		3.49999	36	124.839	114.859	0.825831		3.49999	36	134.844	128.009	0.845058		3.49999	36	187.208	178.538	0.879265		3.49799	36	165.547	157.554	0.87329		3.49899	36
3.59884	37	604.793	597.834	0.84385		3.60084	37	460.331	452.367	0.881498		3.59592	37	234.016	226.885	0.858507		3.59884	37	275.477	262.546	0.84912		3.59884	37	120.279	110.299	0.793044		3.60184	37	130.778	123.943	0.818216		3.59884	37	191.683	183.013	0.901304		3.59884	37	161.759	153.766	0.852294		3.59984	37
3.70069	38	625.601	618.642	0.873221		3.69869	38	446.103	438.139	0.853773		3.69387	38	235.243	228.112	0.863149		3.70069	38	278.261	265.33	0.858124		3.69869	38	135.239	125.259	0.900606		3.70169	38	136.274	129.439	0.854498		3.69969	38	190.419	181.749	0.895079		3.69969	38	159.867	151.874	0.841807		3.69769	38
3.79853	39	624.942	617.983	0.87229		3.80053	39	459.742	451.778	0.88035		3.79383	39	227.444	220.313	0.833639		3.79853	39	285.853	272.922	0.882677		3.79853	39	130.71	120.73	0.868043		3.80153	39	137.277	130.442	0.861119		3.79853	39	194.714	186.044	0.916231		3.79753	39	162.975	154.982	0.859034		3.79953	39
3.89838	40	630.732	623.773	0.880463		3.89938	40	435.753	427.789	0.833604		3.89379	40	232.9	225.769	0.854284		3.90038	40	274.187	261.256	0.844948		3.89838	40	130.805	120.825	0.868726		3.90138	40	130.561	123.726	0.816783		3.89838	40	192.367	183.697	0.904672		3.89938	40	164.09	156.097	0.865214		3.89838	40
4.00023	41	617.087	610.128	0.861203		3.99923	41	440.822	432.858	0.843482		3.99574	41	241.064	233.933	0.885175		4.00023	41	283.364	270.433	0.874628		4.00023	41	126.825	116.845	0.84011		4.00023	41	135.427	128.592	0.848906		3.99822	41	196.369	187.699	0.924382		3.99822	41	162.234	154.241	0.854927		3.99822	41
4.09907	42	621.887	614.928	0.867978		4.09907	42	446.776	438.812	0.855084		4.0937	42	230.987	223.856	0.847045		4.09907	42	280.416	267.485	0.865093		4.09907	42	131.092	121.112	0.870789		4.10207	42	122.127	115.292	0.761106		4.09907	42	195.183	186.513	0.918541		4.09807	42	162.069	154.076	0.854012		4.10007	42
4.19892	43	608.814	601.855	0.849525		4.19892	43	448.491	440.527	0.858426		4.19466	43	238.163	231.032	0.874198		4.20092	43	290.556	277.625	0.897888		4.19892	43	137.389	127.409	0.916065		4.19992	43	130.532	123.697	0.816592		4.19992	43	197.969	189.299	0.932261		4.19792	43	171.023	163.03	0.903642		4.19792	43
4.29876	44	621.283	614.324	0.867126		4.29876	44	465.624	457.66	0.891812		4.29561	44	234.284	227.153	0.859521		4.30077	44	280.936	268.005	0.866775		4.29876	44	132.089	122.109	0.877958		4.30177	44	133.689	126.854	0.837433		4.29876	44	197.238	188.568	0.928661		4.29776	44	171.562	163.569	0.90663		4.29776	44
4.39861	45	623.459	616.5	0.870197		4.39961	45	450.017	442.053	0.8614		4.39457	45	237.351	230.22	0.871126		4.39961	45	275.626	262.695	0.849602		4.39861	45	130.296	120.316	0.865066		4.40061	45	133.578	126.743	0.8367		4.39861	45	191.79	183.12	0.901831		4.39761	45	166.21	158.217	0.876965		4.39861	45
4.50046	46	632.356	625.397	0.882755		4.49946	46	460.971	453.007	0.882745		4.49553	46	225.238	218.107	0.825292		4.49946	46	274.496	261.565	0.845947		4.49946	46	126.774	116.794	0.839743		4.50046	46	130.611	123.776	0.817113		4.49846	46	185.169	176.499	0.869224		4.49846	46	173.29	165.297	0.916208		4.49846	46
4.5993	47	640.517	633.558	0.894275		4.5993	47	456.926	448.962	0.874863		4.59448	47	231.096	223.965	0.847458		4.5993	47	281.044	268.113	0.867124		4.5993	47	130.383	120.403	0.865692		4.6003	47	132.992	126.157	0.832832		4.5993	47	193.322	184.652	0.909376		4.5983	47	164.934	156.941	0.869892		4.5983	47
4.69915	48	633.539	626.58	0.884425		4.69915	48	467.471	459.507	0.895411		4.69444	48	231.476	224.345	0.848896		4.70115	48	274.392	261.461	0.845611		4.69915	48	121.672	111.692	0.80306		4.70015	48	134.04	127.205	0.83975		4.69915	48	194.826	186.156	0.916783		4.70015	48	168.103	160.11	0.887457		4.69815	48
4.799	49	632.135	625.176	0.882443		4.799	49	472.544	464.58	0.905296		4.7964	49	240.026	232.895	0.881248		4.799	49	286.508	273.577	0.884796		4.799	49	121.973	111.993	0.805224		4.802	49	133.734	126.899	0.83773		4.799	49	195.81	187.14	0.921629		4.798	49	181.376	173.383	0.961027		4.8	49
4.89884	50	639.271	632.312	0.892516		4.89984	50	460.235	452.271	0.881311		4.89435	50	233.147	226.016	0.855218		4.89984	50	281.171	268.24	0.867535		4.89884	50	133.385	123.405	0.887276		4.90084	50	138.449	131.614	0.868856		4.89884	50	190.371	181.701	0.894843		4.89784	50	171.761	163.768	0.907733		4.89884	50
4.99869	51	641.871	634.912	0.896186		4.99969	51	465.802	457.838	0.892159		4.99431	51	232.249	225.118	0.85182		5.00069	51	287.585	274.654	0.888279		4.99969	51	133.932	123.952	0.891209		5.00069	51	136.74	129.905	0.857574		4.99869	51	192.847	184.177	0.907036		4.99869	51	171.171	163.178	0.904463		4.99869	51
5.09954	52	642.991	636.032	0.897767		5.09954	52	461.462	453.498	0.883702		5.09427	52	238.083	230.952	0.873896		5.09954	52	290.544	277.613	0.897849		5.09954	52	129.117	119.137	0.856589		5.10054	52	134.103	127.268	0.840166		5.09954	52	192.277	183.607	0.904229		5.09854	52	170.177	162.184	0.898953		5.09854	52
5.19938	53	630.743	623.784	0.880479		5.19938	53	467.962	459.998	0.896368		5.19422	53	229.234	222.103	0.840412		5.19938	53	287.032	274.101	0.88649		5.19938	53	136.693	126.713	0.91106		5.20038	53	135.085	128.25	0.846649		5.19938	53	191.107	182.437	0.898467		5.19838	53	169.872	161.879	0.897263		5.19838	53
5.29923	54	633.038	626.079	0.883718		5.29923	54	458.771	450.807	0.878458		5.29518	54	239.117	231.986	0.877808		5.29923	54	279.029	266.098	0.860607		5.29923	54	129.113	119.133	0.85656		5.30023	54	135.74	128.905	0.850973		5.29923	54	194.84	186.17	0.916852		5.29823	54	172.376	164.383	0.911142		5.29823	54
5.39907	55	632.184	625.225	0.882513		5.40008	55	453.17	445.206	0.867544		5.39514	55	235.956	228.825	0.865847		5.39907	55	296.335	283.404	0.916578		5.39907	55	119.293	109.313	0.785955		5.40108	55	134.025	127.19	0.839651		5.39907	55	199.336	190.666	0.938993		5.39807	55	168.632	160.639	0.89039		5.39907	55
5.49892	56	626.589	619.63	0.874615		5.49992	56	447.967	440.003	0.857405		5.49509	56	224.406	217.275	0.822143		5.49992	56	289.342	276.411	0.893961		5.49992	56	141.192	131.212	0.943408		5.50092	56	127.771	120.936	0.798365		5.49892	56	194.293	185.623	0.914158		5.49892	56	167.27	159.277	0.88284		5.49892	56
5.59977	57	628.335	621.376	0.87708		5.59977	57	466.458	458.494	0.893437		5.59505	57	233.931	226.8	0.858185		5.59977	57	283.105	270.174	0.87379		5.59977	57	126.425	116.445	0.837234		5.60077	57	141.069	134.234	0.886152		5.59977	57	197.752	189.082	0.931193		5.59877	57	165.093	157.1	0.870774		5.59877	57
5.69961	58	629.283	622.324	0.878418		5.69961	58	445.803	437.839	0.853188		5.69501	58	241.612	234.481	0.887249		5.70162	58	285.748	272.817	0.882338		5.69961	58	133.336	123.356	0.886924		5.70062	58	134.314	127.479	0.841559		5.69961	58	187.65	178.98	0.881442		5.69861	58	167.19	159.197	0.882397		5.69861	58
5.79946	59	637.727	630.768	0.890337		5.79946	59	451.829	443.865	0.86493		5.79496	59	237.489	230.358	0.871648		5.79946	59	283.664	270.733	0.875598		5.79946	59	134.376	124.396	0.894401		5.80246	59	131.41	124.575	0.822388		5.79946	59	189.845	181.175	0.892252		5.79846	59	172.417	164.424	0.911369		5.79846	59
5.89931	60	641.534	634.575	0.89571		5.90031	60	477.801	469.837	0.91554		5.89492	60	245.661	238.53	0.90257		5.89931	60	297.053	284.122	0.9189		5.89931	60	131.668	121.688	0.874931		5.90131	60	136.466	129.631	0.855765		5.89731	60	196.765	188.095	0.926332		5.89831	60	166.335	158.342	0.877658		5.89831	60
5.99915	61	640.896	633.937	0.89481		6.00015	61	470.393	462.429	0.901105		5.99488	61	236.81	229.679	0.869079		6.00015	61	291.887	278.956	0.902192		5.99915	61	131.635	121.655	0.874694		6.00115	61	131.141	124.306	0.820612		5.99915	61	193.433	184.763	0.909922		5.99815	61	172.245	164.252	0.910416		5.99915	61
6.1	62	621.482	614.523	0.867407		6.1	62	481.395	473.431	0.922544		6.09483	62	242.648	235.517	0.891169		6.1	62	292.45	279.519	0.904013		6.1	62	134.778	124.798	0.897292		6.101	62	136.637	129.802	0.856894		6.099	62	196.203	187.533	0.923564		6.099	62	170.452	162.459	0.900477		6.099	62
6.19985	63	635.261	628.302	0.886856		6.19985	63	471.622	463.658	0.9035		6.19479	63	234.833	227.702	0.861598		6.19985	63	286.535	273.604	0.884883		6.19785	63	124.838	114.858	0.825823		6.20085	63	130.512	123.677	0.81646		6.19985	63	187.969	179.299	0.883013		6.19885	63	166.816	158.823	0.880324		6.19885	63
6.29969	64	650.551	643.592	0.908438		6.29969	64	471.994	464.03	0.904225		6.29474	64	232.315	225.184	0.85207		6.29969	64	296.446	283.515	0.916937		6.29969	64	128.583	118.603	0.85275		6.30069	64	135.72	128.885	0.850841		6.29969	64	192.631	183.961	0.905973		6.29869	64	177.069	169.076	0.937154		6.29869	64
6.39854	65	663.986	657.027	0.927401		6.39954	65	472.322	464.358	0.904864		6.3947	65	238.676	231.545	0.876139		6.39954	65	295.023	282.092	0.912335		6.39954	65	131.097	121.117	0.870825		6.40154	65	136.178	129.343	0.853864		6.39754	65	198.726	190.056	0.935989		6.39854	65	166.904	158.911	0.880812		6.39854	65
6.49939	66	644.117	637.158	0.899356		6.49838	66	471.99	464.026	0.904217		6.49566	66	239.225	232.094	0.878217		6.50039	66	289.042	276.111	0.892991		6.49939	66	133.189	123.209	0.885867		6.50139	66	130.003	123.168	0.8131		6.49939	66	203.837	195.167	0.96116		6.49838	66	173.224	165.231	0.915842		6.49738	66
6.60023	67	663.159	656.2	0.926234		6.60023	67	473.741	465.777	0.907629		6.59562	67	246.019	238.888	0.903925		6.60023	67	287.49	274.559	0.887972		6.60023	67	130.312	120.332	0.865181		6.60123	67	129.504	122.669	0.809805		6.59923	67	197.334	188.664	0.929134		6.59923	67	169.523	161.53	0.895328		6.59923	67
6.70008	68	644.357	637.398	0.899695		6.69808	68	459.053	451.089	0.879007		6.69357	68	238.527	231.396	0.875576		6.70008	68	298.556	285.625	0.923761		6.70008	68	131.351	121.371	0.872652		6.70108	68	141.164	134.329	0.886779		6.70008	68	203.116	194.446	0.957609		6.69908	68	169.051	161.058	0.892712		6.69708	68
6.79992	69	681.459	674.5	0.952065		6.79992	69	464.399	456.435	0.889425		6.79553	69	250.325	243.194	0.920218		6.79992	69	286.931	274	0.886164		6.79992	69	128.035	118.055	0.84881		6.80093	69	133.021	126.186	0.833023		6.79792	69	189.055	180.385	0.888361		6.79892	69	175.502	167.509	0.928469		6.79892	69
6.89977	70	670.019	663.06	0.935917		6.89977	70	490.193	482.229	0.939688		6.89348	70	245.698	238.567	0.90271		6.89977	70	297.07	284.139	0.918955		6.89877	70	129.376	119.396	0.858451		6.90177	70	133.499	126.664	0.836179		6.89777	70	193.312	184.642	0.909326		6.89877	70	180.112	172.119	0.954021		6.89877	70
6.99962	71	662.584	655.625	0.925422		6.99862	71	459.63	451.666	0.880132		6.99544	71	241.51	234.379	0.886863		7.00062	71	286.868	273.937	0.88596		6.99962	71	125.736	115.756	0.83228		6.99962	71	136.162	129.327	0.853759		6.99962	71	183.86	175.19	0.862777		6.99862	71	164.382	156.389	0.866833		6.99762	71
7.09846	72	649.512	642.553	0.906971		7.09846	72	473.524	465.56	0.907206		7.0954	72	240.117	232.986	0.881592		7.10046	72	286.884	273.953	0.886012		7.10046	72	126.108	116.128	0.834955		7.10147	72	135.343	128.508	0.848352		7.09846	72	203.901	195.231	0.961475		7.09746	72	164.625	156.632	0.86818		7.09946	72
7.20031	73	666.175	659.216	0.930491		7.19831	73	474.243	466.279	0.908607		7.19435	73	247.35	240.219	0.908961		7.20031	73	294.948	282.017	0.912092		7.19831	73	129.039	119.059	0.856028		7.20131	73	123.573	116.738	0.770652		7.20031	73	199.864	191.194	0.941594		7.19931	73	165.043	157.05	0.870496		7.19931	73
7.30016	74	634.32	627.361	0.885528		7.30016	74	470.733	462.769	0.901767		7.29531	74	239.146	232.015	0.877918		7.30016	74	285.423	272.492	0.881287		7.30016	74	132.05	122.07	0.877677		7.30116	74	133.817	126.982	0.838278		7.29816	74	191.898	183.228	0.902363		7.29716	74	167.373	159.38	0.883411		7.29916	74
7.399	75	652.402	645.443	0.91105		7.399	75	462.106	454.142	0.884957		7.39427	75	237.545	230.414	0.87186		7.4	75	290.456	277.525	0.897564		7.4	75	134.467	124.487	0.895055		7.402	75	134.347	127.512	0.841777		7.4	75	189.141	180.471	0.888785		7.399	75	170.379	162.386	0.900073		7.398	75
7.49985	76	649.048	642.089	0.906316		7.49885	76	474.503	466.539	0.909114		7.49522	76	232.488	225.357	0.852725		7.50085	76	285.484	272.553	0.881484		7.49985	76	129.977	119.997	0.862773		7.49985	76	132.981	126.146	0.832759		7.49985	76	195.357	186.687	0.919398		7.49785	76	175.286	167.293	0.927271		7.49785	76
7.5987	77	655.476	648.517	0.915389		7.5987	77	467.544	459.58	0.895553		7.59518	77	238.771	231.64	0.876499		7.5987	77	300.93	287.999	0.931439		7.5987	77	133.386	123.406	0.887283		7.6017	77	140.74	133.905	0.88398		7.5987	77	191.902	183.232	0.902382		7.59769	77	170.948	162.955	0.903227		7.59769	77
7.70054	78	652.538	645.579	0.911242		7.69854	78	482.488	474.524	0.924674		7.69414	78	230.531	223.4	0.84532		7.70054	78	301.715	288.784	0.933978		7.69854	78	135.739	125.759	0.904201		7.70054	78	136.889	130.054	0.858558		7.70054	78	196.792	188.122	0.926465		7.69954	78	170.592	162.599	0.901253		7.69754	78
7.79839	79	666.698	659.739	0.931229		7.79939	79	465.281	457.317	0.891143		7.79409	79	247.991	240.86	0.911386		7.79939	79	297.582	284.651	0.920611		7.80039	79	127.08	117.1	0.841943		7.80139	79	130.721	123.886	0.817839		7.79839	79	193.491	184.821	0.910208		7.79739	79	175.144	167.151	0.926484		7.79939	79
7.89923	80	656.55	649.591	0.916905		7.89923	80	473.902	465.938	0.907943		7.89605	80	244.405	237.274	0.897817		7.90024	80	282.183	269.252	0.870808		7.89923	80	128.08	118.1	0.849133		7.90024	80	131.481	124.646	0.822857		7.89823	80	200.325	191.655	0.943864		7.89923	80	164.781	156.788	0.869044		7.89823	80
8.00008	81	656.906	649.947	0.917408		7.99908	81	482.26	474.296	0.924229		7.99601	81	232.655	225.524	0.853357		7.99908	81	284.773	271.842	0.879184		8.00008	81	134.822	124.842	0.897608		8.00008	81	132.532	125.697	0.829795		7.99908	81	189.263	180.593	0.889386		7.99808	81	172.385	164.392	0.911192		7.99808	81
8.09893	82	645.308	638.349	0.901037		8.10093	82	467.271	459.307	0.895021		8.09597	82	239.363	232.232	0.878739		8.09893	82	302.159	289.228	0.935414		8.09893	82	133.939	123.959	0.891259		8.10193	82	135.098	128.263	0.846734		8.09893	82	198.847	190.177	0.936585		8.09793	82	169.082	161.089	0.892884		8.09993	82
8.20078	83	641.06	634.101	0.895041		8.19877	83	461.809	453.845	0.884378		8.19392	83	241.213	234.082	0.885739		8.20078	83	304.283	291.352	0.942283		8.19877	83	132.469	122.489	0.88069		8.19977	83	132.418	125.583	0.829042		8.20078	83	199.391	190.721	0.939264		8.19777	83	166.851	158.858	0.880518		8.19777	83
8.29862	84	665.4	658.441	0.929397		8.29962	84	476.571	468.607	0.913144		8.29388	84	240.585	233.454	0.883363		8.30062	84	292.618	279.687	0.904557		8.29862	84	134.139	124.159	0.892697		8.30162	84	137.189	130.354	0.860538		8.29862	84	196.56	187.89	0.925322		8.29762	84	170.095	162.102	0.898499		8.29862	84
8.39847	85	644.588	637.629	0.900021		8.39947	85	474.156	466.192	0.908438		8.39483	85	246.929	239.798	0.907368		8.39947	85	291.193	278.262	0.899948		8.39947	85	135.083	125.103	0.899484		8.40047	85	128.911	122.076	0.805891		8.39847	85	182.713	174.043	0.857128		8.39847	85	162.364	154.371	0.855647		8.39847	85
8.49931	86	648.952	641.993	0.906181		8.49931	86	472.917	464.953	0.906023		8.49479	86	241.901	234.77	0.888342		8.50131	86	289.776	276.845	0.895365		8.49931	86	130.71	120.73	0.868043		8.50031	86	135.188	128.353	0.847329		8.49931	86	202.202	193.532	0.953108		8.49831	86	161.368	153.375	0.850127		8.49831	86
8.59916	87	659.297	652.338	0.920783		8.59916	87	479.659	471.695	0.919161		8.59475	87	246.626	239.495	0.906221		8.59916	87	282.533	269.602	0.87194		8.59916	87	135.572	125.592	0.903		8.60016	87	139.203	132.368	0.873834		8.59916	87	191.326	182.656	0.899546		8.59816	87	172.831	164.838	0.913664		8.59816	87
8.69901	88	644.026	637.067	0.899228		8.69901	88	473.492	465.528	0.907144		8.6947	88	245.101	237.97	0.900451		8.69901	88	296.927	283.996	0.918493		8.69901	88	141.56	131.58	0.946054		8.70001	88	131.089	124.254	0.820269		8.69901	88	193.822	185.152	0.911838		8.69801	88	169.079	161.086	0.892867		8.69801	88
8.79885	89	644.913	637.954	0.90048		8.79985	89	468.759	460.795	0.897921		8.79466	89	239.966	232.835	0.881021		8.79985	89	297.047	284.116	0.918881		8.79885	89	141.263	131.283	0.943918		8.80185	89	130.625	123.79	0.817206		8.79885	89	187.527	178.857	0.880836		8.79785	89	170.801	162.808	0.902412		8.79885	89
8.8987	90	649.145	642.186	0.906453		8.8997	90	476.686	468.722	0.913368		8.89462	90	224.237	217.106	0.821504		8.8997	90	294.245	281.314	0.909819		8.8997	90	140.056	130.076	0.93524		8.9007	90	136.637	129.802	0.856894		8.8987	90	191.628	182.958	0.901033		8.8987	90	169.564	161.571	0.895555		8.8987	90
8.99955	91	648.11	641.151	0.904992		8.99955	91	466.895	458.931	0.894289		8.99457	91	225.649	218.518	0.826847		8.99955	91	297.705	284.774	0.921009		8.99955	91	137.188	127.208	0.914619		9.00055	91	129.134	122.299	0.807363		8.99955	91	193.92	185.25	0.912321		8.99854	91	165.358	157.365	0.872242		8.99854	91
9.09939	92	649.658	642.699	0.907177		9.09939	92	468.66	460.696	0.897728		9.09453	92	249.919	242.788	0.918682		9.09939	92	291.321	278.39	0.900362		9.09939	92	141.901	131.921	0.948506		9.10239	92	137.292	130.457	0.861218		9.09939	92	189.154	180.484	0.888849		9.09839	92	166.372	158.379	0.877863		9.09839	92
9.19924	93	637.992	631.033	0.890711		9.19924	93	473.861	465.897	0.907863		9.19449	93	242.622	235.491	0.891071		9.19924	93	298.772	285.841	0.92446		9.19924	93	134.589	124.609	0.895933		9.20024	93	135.389	128.554	0.848656		9.19924	93	201.381	192.711	0.949065		9.19824	93	167.596	159.603	0.884647		9.19824	93
9.29908	94	648.658	641.699	0.905766		9.30008	94	471.413	463.449	0.903092		9.29444	94	240.781	233.65	0.884105		9.29908	94	290.775	277.844	0.898596		9.29908	94	137.107	127.127	0.914037		9.30109	94	132.844	126.009	0.831855		9.29908	94	193.606	184.936	0.910774		9.29808	94	162.41	154.417	0.855902		9.29908	94
9.39893	95	651.758	644.799	0.910141		9.39993	95	471.641	463.677	0.903537		9.3944	95	248.2	241.069	0.912177		9.39993	95	296.424	283.493	0.916866		9.39993	95	134.532	124.552	0.895523		9.40093	95	135.185	128.35	0.847309		9.39893	95	194.919	186.249	0.917241		9.39893	95	165.267	157.274	0.871738		9.39893	95
9.49978	96	653.141	646.182	0.912094		9.49778	96	463.27	455.306	0.887225		9.49436	96	235.88	228.749	0.86556		9.49978	96	293.449	280.518	0.907244		9.49978	96	133.142	123.162	0.885529		9.50078	96	133.311	126.476	0.834938		9.49978	96	194.033	185.363	0.912877		9.49878	96	165.635	157.642	0.873778		9.49878	96
9.59962	97	669.316	662.357	0.934925		9.59962	97	473.965	466.001	0.908065		9.59531	97	236.547	229.416	0.868084		9.59962	97	300.76	287.829	0.930889		9.59962	97	134.94	124.96	0.898456		9.60062	97	129.046	122.211	0.806782		9.59962	97	199.22	190.55	0.938422		9.59862	97	169.037	161.044	0.892634		9.59862	97
9.69947	98	640.502	633.543	0.894253		9.69947	98	464.685	456.721	0.889982		9.69527	98	237.821	230.69	0.872904		9.69947	98	302.2	289.269	0.935546		9.69747	98	140.691	130.711	0.939806		9.70047	98	124.524	117.689	0.77693		9.69947	98	191.662	182.992	0.9012		9.69847	98	170.367	162.374	0.900006		9.69847	98
9.79932	99	662.654	655.695	0.925521		9.80032	99	482.679	474.715	0.925046		9.79523	99	242.912	235.781	0.892168		9.79932	99	302.18	289.249	0.935482		9.79932	99	137.545	127.565	0.917186		9.80132	99	129.148	122.313	0.807455		9.79932	99	183.139	174.469	0.859226		9.79832	99	169.767	161.774	0.896681		9.79832	99
9.89916	100	679.802	672.843	0.949726		9.90016	100	462.273	454.309	0.885282		9.89518	100	247.948	240.817	0.911224		9.90016	100	300.09	287.159	0.928722		9.90016	100	140.889	130.909	0.941229		9.90116	100	130.337	123.502	0.815305		9.89916	100	199.994	191.324	0.942234		9.89816	100	168.876	160.883	0.891742		9.89916	100
10	101	669.201	662.242	0.934762		9.99801	101	468.208	460.244	0.896847		9.99514	101	240.804	233.673	0.884192		10	101	282.546	269.615	0.871982		10	101	140.869	130.889	0.941086		10.001	101	131.661	124.826	0.824045		9.99901	101	196.358	187.688	0.924327		9.99901	101	164.29	156.297	0.866323		9.99901	101
10.0999	102	673.992	667.033	0.941525		10.0999	102	482.653	474.689	0.924995		10.0951	102	239.973	232.842	0.881047		10.0999	102	282.329	269.398	0.87128		10.0999	102	143.461	133.481	0.959722		10.1009	102	133.105	126.27	0.833578		10.0999	102	191.037	182.367	0.898122		10.0989	102	166.818	158.825	0.880335		10.0989	102
10.1997	103	675.787	668.828	0.944059		10.1997	103	460.046	452.082	0.880942		10.1931	103	249.805	242.674	0.91825		10.1997	103	294.3	281.369	0.909996		10.1977	103	138.023	128.043	0.920623		10.2007	103	133.031	126.196	0.833089		10.1997	103	195.453	186.783	0.91987		10.1987	103	169.407	161.414	0.894685		10.1987	103
10.2995	104	660.695	653.736	0.922756		10.2995	104	478.528	470.564	0.916957		10.295	104	243.201	236.07	0.893262		10.2995	104	292.754	279.823	0.904996		10.2995	104	133.299	123.319	0.886658		10.3015	104	134.879	128.044	0.845289		10.2995	104	196.825	188.155	0.926627		10.2985	104	162.029	154.036	0.85379		10.2985	104
10.3984	105	677.682	670.723	0.946733		10.4004	105	477.197	469.233	0.914363		10.395	105	241.234	234.103	0.885819		10.4004	105	284.244	271.313	0.877474		10.3994	105	134.337	124.357	0.894121		10.4014	105	145.724	138.889	0.916883		10.3994	105	193.856	185.186	0.912006		10.3984	105	173.923	165.93	0.919716		10.3994	105
10.5002	106	661.15	654.191	0.923398		10.4982	106	466.98	459.016	0.894454		10.4939	106	229.703	222.572	0.842187		10.5002	106	290.824	277.893	0.898754		10.5002	106	125.515	115.535	0.830691		10.5012	106	135.985	129.15	0.85259		10.4992	106	187.164	178.494	0.879049		10.4992	106	173.139	165.146	0.915371		10.4992	106
10.6001	107	653.941	646.982	0.913223		10.6001	107	452.443	444.479	0.866127		10.5949	107	241.94	234.809	0.88849		10.6001	107	286.084	273.153	0.883424		10.6001	107	133.011	123.031	0.884587		10.6011	107	131.789	124.954	0.82489		10.6001	107	200.581	191.911	0.945125		10.5971	107	162.951	154.958	0.858901		10.5991	107
10.6999	108	644.672	637.713	0.900139		10.6989	108	467.368	459.404	0.89521		10.6948	108	238.565	231.434	0.875719		10.6999	108	284.671	271.74	0.878855		10.6979	108	134.973	124.993	0.898694		10.6999	108	134.842	128.007	0.845044		10.6999	108	198.392	189.722	0.934344		10.6989	108	155.551	147.558	0.817884		10.6989	108
10.7998	109	651.181	644.222	0.909327		10.7998	109	461.115	453.151	0.883025		10.7958	109	236.575	229.444	0.86819		10.7998	109	299.365	286.434	0.926378		10.7998	109	136.589	126.609	0.910313		10.8018	109	140.574	133.739	0.882885		10.7998	109	194.881	186.211	0.917053		10.7978	109	170.303	162.31	0.899652		10.7988	109
10.8986	110	647.798	640.839	0.904552		10.8986	110	457.653	449.689	0.876279		10.8958	110	241.802	234.671	0.887968		10.9006	110	293.667	280.736	0.907949		10.8986	110	137.933	127.953	0.919976		10.9016	110	130.23	123.395	0.814598		10.8996	110	195.907	187.237	0.922106		10.8986	110	176.844	168.851	0.935907		10.8996	110
11.0005	111	652.501	645.542	0.91119		10.9985	111	448.452	440.488	0.85835		10.9957	111	248.387	241.256	0.912885		11.0005	111	295.504	282.573	0.91389		11.0005	111	141.829	131.849	0.947988		10.9995	111	135.063	128.228	0.846503		10.9995	111	198.477	189.807	0.934763		10.9995	111	171.248	163.255	0.904889		10.9975	111
11.0983	112	653.843	646.884	0.913084		11.0983	112	456.674	448.71	0.874372		11.0957	112	234.629	227.498	0.860826		11.0983	112	288.155	275.224	0.890122		11.1003	112	138.199	128.219	0.921888		11.1013	112	144.116	137.281	0.906267		11.0983	112	191.547	182.877	0.900634		11.0973	112	162.792	154.799	0.85802		11.0993	112
11.2002	113	644.127	637.168	0.89937		11.2002	113	466.599	458.635	0.893712		11.1936	113	234.305	227.174	0.8596		11.2002	113	295.817	282.886	0.914903		11.1982	113	136.549	126.569	0.910025		11.2012	113	132.173	125.338	0.827425		11.2002	113	200.199	191.529	0.943244		11.1972	113	165.004	157.011	0.87028		11.1982	113
11.299	114	636.329	629.37	0.888363		11.3	114	458.59	450.626	0.878105		11.2956	114	242.653	235.522	0.891188		11.3	114	298.794	285.863	0.924531		11.3	114	135.129	125.149	0.899815		11.302	114	133.6	126.765	0.836845		11.298	114	201.813	193.143	0.951192		11.298	114	173.072	165.079	0.915		11.299	114
11.3989	115	644.49	637.531	0.899883		11.4009	115	455.462	447.498	0.87201		11.3935	115	233.49	226.359	0.856516		11.3989	115	295.803	282.872	0.914857		11.3989	115	139.753	129.773	0.933062		11.3999	115	130.161	123.326	0.814143		11.3989	115	192.023	183.353	0.902978		11.3989	115	164.854	156.861	0.869449		11.3979	115
11.5007	116	623.463	616.504	0.870203		11.4987	116	459.972	452.008	0.880798		11.4955	116	236.372	229.241	0.867421		11.5007	116	307.56	294.629	0.952882		11.5007	116	134.882	124.902	0.898039		11.4997	116	137.247	130.412	0.860921		11.4997	116	194.886	186.216	0.917078		11.4977	116	170.091	162.098	0.898476		11.4977	116
11.6006	117	626.31	619.351	0.874221		11.5986	117	465.856	457.892	0.892264		11.5954	117	236.812	229.681	0.869086		11.6006	117	301.054	288.123	0.93184		11.5986	117	135.983	126.003	0.905955		11.6016	117	135.531	128.696	0.849593		11.5986	117	201.486	192.816	0.949582		11.5976	117	164.434	156.441	0.867121		11.5996	117
11.7004	118	640.092	633.133	0.893675		11.6994	118	456.159	448.195	0.873368		11.6944	118	238.188	231.057	0.874293		11.7004	118	295.801	282.87	0.914851		11.6984	118	136.296	126.316	0.908206		11.7004	118	135.468	128.633	0.849177		11.7004	118	189.383	180.713	0.889977		11.6974	118	176.89	168.897	0.936162		11.6984	118
11.7992	119	659.793	652.834	0.921483		11.7992	119	454.322	446.358	0.869788		11.7944	119	240.774	233.643	0.884078		11.8002	119	300.18	287.249	0.929013		11.7992	119	133.077	123.097	0.885061		11.8022	119	137.966	131.131	0.865668		11.7982	119	196.15	187.48	0.923303		11.7982	119	169.657	161.664	0.896071		11.7992	119
11.8991	120	643.315	636.356	0.898224		11.8991	120	456.978	449.014	0.874964		11.8943	120	242.881	235.75	0.892051		11.8991	120	296.519	283.588	0.917173		11.8991	120	133.735	123.755	0.889792		11.9001	120	143.028	136.193	0.899085		11.8991	120	190.301	181.631	0.894498		11.8991	120	161.88	153.887	0.852965		11.8981	120
11.9989	121	666.198	659.239	0.930524		11.9989	121	447.194	439.23	0.855899		11.9963	121	246.497	239.366	0.905733		12.0009	121	287.604	274.673	0.88834		12.0009	121	129.992	120.012	0.86288		11.9999	121	132.806	125.971	0.831604		11.9989	121	185.605	176.935	0.871371		11.9979	121	164.784	156.791	0.869061		11.9979	121
12.0988	122	658.251	651.292	0.919306		12.0988	122	466.068	458.104	0.892677		12.0942	122	247.112	239.981	0.90806		12.0988	122	303.659	290.728	0.940265		12.0988	122	141.158	131.178	0.943163		12.1018	122	136.204	129.369	0.854036		12.0988	122	197.687	189.017	0.930872		12.0978	122	173.995	166.002	0.920116		12.0978	122
12.1986	123	641.543	634.584	0.895723		12.1996	123	457.846	449.882	0.876655		12.1942	123	245.326	238.195	0.901302		12.2006	123	299.016	286.085	0.925249		12.1986	123	139.947	129.967	0.934456		12.2006	123	133.805	126.97	0.838199		12.1986	123	192.091	183.421	0.903313		12.1976	123	167.921	159.928	0.886449		12.1986	123
12.2985	124	651.017	644.058	0.909096		12.3005	124	455.804	447.84	0.872676		12.2941	124	239.514	232.383	0.87931		12.2995	124	288.097	275.166	0.889935		12.2995	124	138.155	128.175	0.921572		12.3015	124	130.707	123.872	0.817747		12.2985	124	195.973	187.303	0.922431		12.2985	124	166.81	158.817	0.880291		12.2985	124
12.3993	125	643.001	636.042	0.897781		12.3993	125	458.842	450.878	0.878596		12.3941	125	244.953	237.822	0.899891		12.3993	125	299.026	286.095	0.925281		12.3993	125	133.057	123.077	0.884918		-4353.85	125	136.602	129.767	0.856663		12.3993	125	195.305	186.635	0.919142		12.3993	125	168.835	160.842	0.891515		12.4003	125
12.4992	126	646.91	639.951	0.903298		12.4992	126	455.426	447.462	0.87194		12.4961	126	230.864	223.733	0.84658		12.4992	126	295.465	282.534	0.913764		12.4992	126	140.452	130.472	0.938087		12.5002	126	145.769	138.934	0.91718		12.4992	126	198.577	189.907	0.935256		12.4982	126	169.432	161.439	0.894824		12.4982	126
12.599	127	657.256	650.297	0.917902		12.599	127	444.231	436.267	0.850125		12.594	127	237.455	230.324	0.871519		12.599	127	307.153	294.222	0.951565		12.599	127	131.051	121.071	0.870495		12.6	127	137.756	130.921	0.864281		12.599	127	192.804	184.134	0.906825		12.598	127	165.887	157.894	0.875175		12.598	127
12.6989	128	658.821	651.862	0.920111		12.6999	128	462.302	454.338	0.885338		12.695	128	234.191	227.06	0.859169		12.6999	128	292.552	279.621	0.904343		12.6989	128	134.074	124.094	0.89223		12.7009	128	134.16	127.325	0.840542		12.6989	128	192.989	184.319	0.907736		12.6979	128	170.021	162.028	0.898088		12.6989	128
12.7987	129	651.202	644.243	0.909357		12.7997	129	458.619	450.655	0.878162		12.7959	129	247.356	240.225	0.908984		12.7997	129	281.221	268.29	0.867697		12.7997	129	136.002	126.022	0.906092		12.8007	129	135.442	128.607	0.849005		12.7987	129	200.882	192.212	0.946607		12.7987	129	166.821	158.828	0.880352		12.7987	129
12.8996	130	654.348	647.389	0.913797		12.8996	130	471.615	463.651	0.903486		12.8949	130	235.638	228.507	0.864644		12.8996	130	302.322	289.391	0.935941		12.8996	130	134.797	124.817	0.897428		12.9006	130	137.208	130.373	0.860664		12.8996	130	196.608	187.938	0.925559		12.8986	130	171.68	163.687	0.907284		12.8986	130
12.9994	131	649.244	642.285	0.906593		12.9994	131	456.371	448.407	0.873781		12.9958	131	241.071	233.94	0.885202		13.0014	131	291.587	278.656	0.901222		12.9994	131	137.05	127.07	0.913627		13.0004	131	137.382	130.547	0.861812		12.9994	131	188.616	179.946	0.8862		12.9984	131	173.738	165.745	0.918691		12.9984	131
13.0992	132	644.053	637.094	0.899266		13.0992	132	457.24	449.276	0.875474		13.0948	132	229.613	222.482	0.841846		13.0992	132	295.309	282.378	0.91326		13.0992	132	129.732	119.752	0.861011		13.1002	132	143.992	137.157	0.905449		13.0992	132	196.474	187.804	0.924899		13.0982	132	173.342	165.349	0.916496		13.0982	132
13.1991	133	661.633	654.674	0.92408		13.2001	133	460.149	452.185	0.881143		13.1948	133	239.624	232.493	0.879727		13.1991	133	299.219	286.288	0.925905		13.1991	133	136.395	126.415	0.908918		13.2011	133	134.581	127.746	0.843321		13.1991	133	200.703	192.033	0.945726		13.1981	133	163.514	155.521	0.862021		13.1991	133
13.2989	134	663.407	656.448	0.926584		13.2999	134	458.223	450.259	0.87739		13.2947	134	237.231	230.1	0.870672		13.2999	134	290.433	277.502	0.89749		13.2999	134	132.548	122.568	0.881258		13.3009	134	128.492	121.657	0.803125		13.2989	134	198.779	190.109	0.93625		13.2989	134	164.529	156.536	0.867647		13.2989	134
13.3998	135	665.251	658.292	0.929187		13.3998	135	462.484	454.52	0.885693		13.3947	135	243.501	236.37	0.894397		13.3998	135	284.465	271.534	0.878188		13.3998	135	136.629	126.649	0.9106		13.4008	135	128.64	121.805	0.804102		13.3998	135	193.244	184.574	0.908992		13.3988	135	171.99	163.997	0.909002		13.3988	135
13.4996	136	676.44	669.481	0.94498		13.4996	136	444.671	436.707	0.850982		13.4946	136	242.139	235.008	0.889243		13.4996	136	300.935	288.004	0.931455		13.4996	136	145.634	135.654	0.975346		13.5006	136	139.094	132.259	0.873114		13.4996	136	191.924	183.254	0.902491		13.4986	136	174.382	166.389	0.922261		13.4986	136
13.5995	137	672.013	665.054	0.938732		13.5995	137	451.025	443.061	0.863364		13.5946	137	239.025	231.894	0.87746		13.5995	137	284.283	271.352	0.8776		13.5995	137	130.779	120.799	0.868539		13.6005	137	139.683	132.848	0.877003		13.5995	137	188.051	179.381	0.883417		13.5985	137	167.906	159.913	0.886365		13.5985	137
13.6993	138	649.086	642.127	0.90637		13.7003	138	462.602	454.638	0.885923		13.6945	138	233.6	226.469	0.856932		13.7013	138	290.902	277.971	0.899007		13.6993	138	138.347	128.367	0.922952		13.7013	138	139.841	133.006	0.878046		13.6993	138	196.198	187.528	0.923539		13.6983	138	171.159	163.166	0.904396		13.6983	138
13.7992	139	652.864	645.905	0.911703		13.8002	139	465.892	457.928	0.892334		13.7955	139	227.39	220.259	0.833435		13.8002	139	291.733	278.802	0.901694		13.8002	139	133.126	123.146	0.885414		13.8012	139	135.979	129.144	0.85255		13.7992	139	189.098	180.428	0.888573		13.7982	139	172.269	164.276	0.910549		13.7992	139
13.9	140	670.149	663.19	0.936101		13.9	140	459.592	451.628	0.880058		13.8954	140	243.515	236.384	0.89445		13.9	140	299.768	286.837	0.927681		13.9	140	129.008	119.028	0.855806		13.901	140	138.403	131.568	0.868553		13.9	140	187.439	178.769	0.880403		13.899	140	166.366	158.373	0.87783		13.899	140
13.9999	141	655.212	648.253	0.915017		13.9979	141	441.209	433.245	0.844236		13.9954	141	231.786	224.655	0.850069		13.9999	141	301.685	288.754	0.933881		13.9999	141	145.437	135.457	0.973929		14.0009	141	144.653	137.818	0.909812		13.9999	141	183.252	174.582	0.859783		13.9989	141	166.238	158.245	0.87712		13.9989	141
14.0997	142	645.786	638.827	0.901712		14.0997	142	465.057	457.093	0.890707		14.0954	142	240.175	233.044	0.881812		14.0997	142	300.54	287.609	0.930178		14.0997	142	140.27	130.29	0.936779		14.1007	142	137.17	130.335	0.860413		14.0997	142	190.142	181.472	0.893715		14.0987	142	163.655	155.662	0.862803		14.0987	142
14.1996	143	661.973	655.014	0.92456		14.2006	143	468.593	460.629	0.897597		14.1953	143	243.554	236.423	0.894597		14.1996	143	305.153	292.222	0.945097		14.1986	143	135.75	125.77	0.90428		14.2016	143	133.859	127.024	0.838555		14.1996	143	202.748	194.078	0.955797		14.1986	143	168.575	160.582	0.890074		14.1986	143
14.2994	144	648.024	641.065	0.904871		14.3004	144	468.101	460.137	0.896639		14.2953	144	236.436	229.305	0.867664		14.3004	144	296.982	284.051	0.918671		14.2994	144	133.896	123.916	0.89095		14.3014	144	131.826	124.991	0.825134		14.2994	144	190.612	181.942	0.896029		14.2984	144	171.515	163.522	0.906369		14.2994	144
14.3983	145	650.128	643.169	0.907841		14.4003	145	467.193	459.229	0.894869		14.3952	145	237.397	230.266	0.8713		14.4003	145	302.537	289.606	0.936636		14.4003	145	143.823	133.843	0.962325		14.4013	145	134.247	127.412	0.841117		14.3983	145	196.533	187.863	0.925189		14.3993	145	167.634	159.641	0.884858		14.3993	145
14.5001	146	659.552	652.593	0.921143		14.4981	146	467.535	459.571	0.895536		14.4942	146	243.081	235.95	0.892807		14.5001	146	303.254	290.323	0.938955		14.5001	146	135.949	125.969	0.905711		14.5001	146	135.805	128.97	0.851402		14.5001	146	193.788	185.118	0.911671		14.4991	146	169.085	161.092	0.8929		14.4991	146
14.5979	147	656.971	650.012	0.9175		14.5999	147	457.004	449.04	0.875015		14.5951	147	243.299	236.168	0.893632		14.5999	147	295.934	283.003	0.915281		14.5999	147	136.205	126.225	0.907552		14.6009	147	129.292	122.457	0.808406		14.5999	147	195.738	187.068	0.921274		14.5969	147	168.731	160.738	0.890938		14.5989	147
14.6998	148	650.626	643.667	0.908544		14.6988	148	470.88	462.916	0.902054		14.6941	148	247.025	239.894	0.907731		14.6998	148	291.381	278.45	0.900556		14.6988	148	141.015	131.035	0.942135		14.7018	148	139.245	132.41	0.874111		14.6998	148	198.976	190.306	0.937221		14.6988	148	174.748	166.755	0.924289		14.6988	148
14.7996	149	645.507	638.548	0.901318		14.8006	149	471.362	463.398	0.902993		14.7951	149	244.386	237.255	0.897745		14.8006	149	298.64	285.709	0.924033		14.7996	149	136.255	126.275	0.907911		14.8016	149	134.115	127.28	0.840245		14.7986	149	196.495	187.825	0.925002		14.7976	149	169.605	161.612	0.895783		14.7996	149
14.8985	150	663.64	656.681	0.926913		14.8985	150	483.627	475.663	0.926893		14.894	150	248.896	241.765	0.914811		14.8985	150	304.606	291.675	0.943328		14.8985	150	134.121	124.141	0.892568		14.9015	150	135.36	128.525	0.848464		14.8985	150	200.419	191.749	0.944327		14.8995	150	173.079	165.086	0.915038		14.8975	150
15.0003	151	667.166	660.207	0.93189		14.9983	151	454.524	446.56	0.870182		14.996	151	242.486	235.355	0.890556		15.0003	151	290.065	277.134	0.8963		15.0003	151	127.66	117.68	0.846113		15.0003	151	132.585	125.75	0.830145		15.0003	151	192.059	183.389	0.903156		14.9993	151	166.429	158.436	0.878179		14.9973	151
15.0982	152	661.554	654.595	0.923969		15.1002	152	469.142	461.178	0.898667		15.0939	152	244.532	237.401	0.898298		15.0992	152	304.752	291.821	0.9438		15.0982	152	136.058	126.078	0.906495		15.1012	152	138.57	131.735	0.869655		15.1002	152	189.656	180.986	0.891321		15.0972	152	164.127	156.134	0.865419		15.0992	152
15.2	153	666.109	659.15	0.930398		15.199	153	475.172	467.208	0.910417		15.1959	153	237.463	230.332	0.87155		15.2	153	294.547	281.616	0.910795		15.199	153	131.494	121.514	0.87368		15.202	153	139.674	132.839	0.876943		15.2	153	197.031	188.361	0.927642		15.199	153	179.429	171.436	0.950235		15.198	153
15.2999	154	656.938	649.979	0.917453		15.2989	154	480.996	473.032	0.921766		15.2958	154	236.564	229.433	0.868148		15.3009	154	293.402	280.471	0.907092		15.2999	154	131.883	121.903	0.876477		15.3019	154	136.876	130.041	0.858472		15.2989	154	196.048	187.378	0.922801		15.2979	154	169.84	161.847	0.897085		15.2999	154
15.3987	155	678.447	671.488	0.947813		15.3987	155	473.328	465.364	0.906824		15.3938	155	233.5	226.369	0.856554		15.4007	155	301.271	288.34	0.932542		15.4007	155	135.392	125.412	0.901706		15.3997	155	131.816	124.981	0.825068		15.3987	155	189.221	180.551	0.889179		15.3997	155	174.172	166.179	0.921097		15.3977	155
15.4986	156	679.402	672.443	0.949161		15.4986	156	479.73	471.766	0.919299		15.4958	156	241.206	234.075	0.885713		15.5006	156	310.689	297.758	0.963001		15.5006	156	131.898	121.918	0.876584		15.5006	156	134.705	127.87	0.84414		15.4986	156	182.98	174.31	0.858443		15.4996	156	176.471	168.478	0.93384		15.4976	156
15.5984	157	669.441	662.482	0.935101		15.6004	157	471.28	463.316	0.902833		15.5957	157	232.373	225.242	0.85229		15.5994	157	296.087	283.156	0.915776		15.5984	157	133.314	123.334	0.886765		15.6014	157	140.141	133.306	0.880026		15.5984	157	199.531	190.861	0.939954		15.5974	157	165.322	157.329	0.872043		15.5984	157
15.7003	158	679.094	672.135	0.948727		15.6993	158	486.522	478.558	0.932534		15.6947	158	242.908	235.777	0.892153		15.7003	158	288.995	276.064	0.892839		15.6993	158	132.086	122.106	0.877936		15.7003	158	132.537	125.702	0.829828		15.6983	158	197.317	188.647	0.92905		15.6983	158	174.822	166.829	0.924699		-4665.29	158
15.7991	159	667.714	660.755	0.932664		15.7991	159	476.592	468.628	0.913184		15.7956	159	234.209	227.078	0.859237		15.7991	159	289.453	276.522	0.89432		15.8001	159	131.662	121.682	0.874888		15.8021	159	127.027	120.192	0.793453		15.7991	159	192.469	183.799	0.905175		15.7981	159	170.242	162.249	0.899313		15.8001	159
15.8989	160	681.895	674.936	0.95268		15.8989	160	483.278	475.314	0.926213		15.8946	160	248.683	241.552	0.914005		15.8989	160	300.838	287.907	0.931142		15.8989	160	137.193	127.213	0.914655		15.8999	160	133.305	126.47	0.834898		15.8989	160	198.591	189.921	0.935324		15.8999	160	162.664	154.671	0.85731		15.8999	160
15.9988	161	655.784	648.825	0.915824		15.9988	161	482.023	474.059	0.923767		15.9955	161	235.228	228.097	0.863093		16.0008	161	293.839	280.908	0.908506		15.9988	161	137.215	127.235	0.914813		15.9998	161	136.589	129.754	0.856577		15.9988	161	188.065	179.395	0.883486		15.9978	161	166.347	158.354	0.877724		15.9978	161
16.0986	162	658.948	651.989	0.92029		16.0996	162	463.942	455.978	0.888534		16.0955	162	237.342	230.211	0.871092		16.0996	162	309.323	296.392	0.958583		16.0986	162	140.811	130.831	0.940669		16.1006	162	132.987	126.152	0.832799		16.0986	162	199.054	190.384	0.937605		16.0976	162	170.033	162.04	0.898155		16.0986	162
16.1985	163	663.065	656.106	0.926101		16.1995	163	492.222	484.258	0.943642		16.1945	163	245.14	238.009	0.900598		16.2005	163	292.641	279.71	0.904631		16.1995	163	128.289	118.309	0.850636		16.2005	163	135.341	128.506	0.848339		16.1985	163	196.884	188.214	0.926918		16.1985	163	161.693	153.7	0.851928		16.1985	163
16.2993	164	663.082	656.123	0.926125		16.3013	164	479.02	471.056	0.917916		16.2944	164	245.624	238.493	0.90243		16.2993	164	287.114	274.183	0.886756		16.2993	164	131.906	121.926	0.876642		16.3003	164	131.229	124.394	0.821193		16.2993	164	190.251	181.581	0.894252		16.2983	164	168.258	160.265	0.888317		16.3003	164
16.3992	165	662.71	655.751	0.9256		16.3992	165	472.644	464.68	0.905491		16.3944	165	244.158	237.027	0.896883		16.3992	165	297.592	284.661	0.920643		16.3992	165	142.641	132.661	0.953826		16.4002	165	128.047	121.212	0.800187		16.3992	165	197.811	189.141	0.931483		16.3982	165	174.017	166.024	0.920237		16.3982	165
16.499	166	672.062	665.103	0.938801		16.499	166	464.472	456.508	0.889567		16.4943	166	234.51	227.379	0.860376		16.499	166	280.387	267.456	0.864999		16.499	166	133.607	123.627	0.888872		16.5	166	134.864	128.029	0.84519		16.499	166	200.2	191.53	0.943248		16.498	166	171.743	163.75	0.907633		16.498	166
16.5989	167	653.825	646.866	0.913059		16.5999	167	473.976	466.012	0.908087		16.5943	167	247.397	240.266	0.909139		16.5999	167	295.966	283.035	0.915385		16.5989	167	136.46	126.48	0.909385		16.6009	167	135.183	128.348	0.847296		16.5989	167	191.588	182.918	0.900836		16.5979	167	168.259	160.266	0.888322		16.5989	167
16.6987	168	657.102	650.143	0.917685		16.6997	168	475.472	467.508	0.911002		16.6942	168	236.364	229.233	0.867391		16.7007	168	296.879	283.948	0.918337		16.6997	168	128.563	118.583	0.852606		16.7007	168	140.419	133.584	0.881861		16.6987	168	183.792	175.122	0.862442		16.6987	168	164.464	156.471	0.867287		16.6987	168
16.7996	169	667.166	660.207	0.93189		16.7996	169	470.356	462.392	0.901033		16.7942	169	241.943	234.812	0.888501		16.7996	169	292.961	280.03	0.905666		16.7996	169	130.939	120.959	0.869689		16.8006	169	137.337	130.502	0.861515		16.7996	169	193.781	185.111	0.911636		16.7986	169	166.899	158.906	0.880784		16.7986	169
16.8994	170	662.041	655.082	0.924656		16.8994	170	475.796	467.832	0.911633		16.8951	170	244.943	237.812	0.899853		16.8994	170	303.544	290.613	0.939893		16.8994	170	135.535	125.555	0.902734		16.9004	170	141.714	134.879	0.89041		16.8994	170	197.624	188.954	0.930562		16.9004	170	181.384	173.391	0.961071		16.8984	170
16.9993	171	661.199	654.24	0.923468		16.9993	171	479.399	471.435	0.918654		16.9951	171	249.51	242.379	0.917134		16.9993	171	303.553	290.622	0.939922		16.9993	171	130.512	120.532	0.866619		17.0003	171	137.964	131.129	0.865655		16.9993	171	197.324	188.654	0.929085		16.9983	171	161.478	153.485	0.850736		16.9983	171
17.0991	172	670.132	663.173	0.936077		17.1001	172	471.491	463.527	0.903244		17.0951	172	234.415	227.284	0.860016		17.0991	172	312.064	299.133	0.967448		17.0991	172	134.359	124.379	0.894279		17.1011	172	139.76	132.925	0.877511		17.0991	172	192.967	184.297	0.907627		17.0981	172	171.354	163.361	0.905477		17.0991	172
17.1989	173	661.8	654.841	0.924316		17.2	173	481.09	473.126	0.921949		17.195	173	240.768	233.637	0.884055		17.2	173	297.592	284.661	0.920643		17.2	173	142.306	132.326	0.951417		17.201	173	134.702	127.867	0.84412		17.1989	173	189.98	181.31	0.892917		17.1989	173	167.069	159.076	0.881726		17.1989	173
17.2998	174	655.232	648.273	0.915045		17.2998	174	487.261	479.297	0.933974		17.295	174	235.917	228.786	0.8657		17.2998	174	301.404	288.473	0.932972		17.2998	174	133.499	123.519	0.888096		17.3008	174	141.174	134.339	0.886845		17.2998	174	194.073	185.403	0.913074		17.2988	174	161.645	153.652	0.851662		17.2988	174
17.3996	175	669.354	662.395	0.934978		17.3996	175	489.171	481.207	0.937696		17.3949	175	241.303	234.172	0.88608		17.3996	175	301.44	288.509	0.933088		17.3996	175	144.5	134.52	0.967192		17.4006	175	134.673	127.838	0.843929		17.3996	175	206.008	197.338	0.971852		17.3986	175	166.026	158.033	0.875945		17.3986	175
17.4995	176	649.995	643.036	0.907653		17.4985	176	470.763	462.799	0.901826		17.4949	176	238.009	230.878	0.873616		17.4995	176	290.927	277.996	0.899088		17.4995	176	149.122	139.142	1.00042		17.5005	176	136.507	129.672	0.856036		17.4995	176	197.889	189.219	0.931867		17.4985	176	175.403	167.41	0.92792		17.4985	176
17.5993	177	679.432	672.473	0.949204		17.6003	177	478.222	470.258	0.916361		17.5948	177	248.654	241.523	0.913895		17.5993	177	296.497	283.566	0.917102		17.5993	177	138.719	128.739	0.925627		17.6013	177	140.292	133.457	0.881023		17.5993	177	196.961	188.291	0.927297		17.5983	177	167.851	159.858	0.886061		17.5983	177
17.6992	178	669.681	662.722	0.93544		17.7002	178	471.894	463.93	0.90403		17.6948	178	243.492	236.361	0.894363		17.7002	178	296.848	283.917	0.918237		17.7002	178	134.105	124.125	0.892453		17.7012	178	134.2	127.365	0.840806		17.6992	178	199.5	190.83	0.939801		17.6982	178	167.06	159.067	0.881676		17.6992	178
17.8	179	668.853	661.894	0.934271		17.8	179	458.443	450.479	0.877819		17.7948	179	237.224	230.093	0.870645		17.8	179	303.635	290.704	0.940187		17.8	179	139.584	129.604	0.931846		17.801	179	133.269	126.434	0.83466		17.8	179	189.772	181.102	0.891893		17.799	179	170.702	162.709	0.901863		17.799	179
17.8979	180	668.764	661.805	0.934146		17.8999	180	470.354	462.39	0.901029		17.8947	180	251.234	244.103	0.923657		17.8999	180	296.601	283.67	0.917438		17.8999	180	135.316	125.336	0.90116		17.9009	180	135.127	128.292	0.846926		17.8999	180	196.247	187.577	0.923781		17.8989	180	163.401	155.408	0.861395		17.8989	180
17.9997	181	687.077	680.118	0.959995		17.9987	181	463.755	455.791	0.88817		17.9947	181	252.353	245.222	0.927892		17.9997	181	301.214	288.283	0.932358		17.9997	181	131.669	121.689	0.874938		17.9997	181	137.844	131.009	0.864862		17.9997	181	198.562	189.892	0.935182		17.9987	181	168.481	160.488	0.889553		17.9977	181
18.0996	182	645.619	638.66	0.901476		18.1006	182	467.439	459.475	0.895349		18.0956	182	234.25	227.119	0.859392		18.0996	182	301.292	288.361	0.93261		18.0996	182	142.017	132.037	0.94934		18.1016	182	139.926	133.091	0.878607		18.0976	182	192.118	183.448	0.903446		18.0976	182	180.581	172.588	0.95662		18.0986	182
18.1994	183	661.99	655.031	0.924584		18.2004	183	465.197	457.233	0.89098		18.1956	183	245.466	238.335	0.901832		18.2004	183	298.761	285.83	0.924424		18.1994	183	131.027	121.047	0.870322		18.2014	183	135.508	128.673	0.849441		18.1994	183	198.85	190.18	0.9366		18.1984	183	163.156	155.163	0.860037		18.1994	183
18.3003	184	663.287	656.328	0.926415		18.3003	184	455.537	447.573	0.872156		18.2955	184	236.517	229.386	0.86797		18.3003	184	298.475	285.544	0.923499		18.3003	184	138.492	128.512	0.923995		18.2993	184	135.615	128.78	0.850147		18.2993	184	194.345	185.675	0.914414		18.2993	184	174.218	166.225	0.921352		18.2993	184
18.4001	185	652.939	645.98	0.911808		18.3981	185	461.305	453.341	0.883396		18.3935	185	244.884	237.753	0.89963		18.4001	185	295.503	282.572	0.913887		18.4001	185	145.5	135.52	0.974382		18.4011	185	139.958	133.123	0.878818		18.3981	185	195.333	186.663	0.919279		18.3991	185	163.361	155.368	0.861173		18.3991	185
18.5	186	672.202	665.243	0.938998		18.499	186	473.745	465.781	0.907637		18.4955	186	236.962	229.831	0.869654		18.5	186	297.009	284.078	0.918758		18.5	186	128.751	118.771	0.853958		18.5	186	136.43	129.595	0.855528		18.5	186	198.76	190.09	0.936157		18.499	186	164.294	156.301	0.866345		18.498	186
18.5988	187	646.865	639.906	0.903235		18.5998	187	460.861	452.897	0.88253		18.5954	187	242.143	235.012	0.889258		18.5998	187	291.268	278.337	0.90019		18.5998	187	134.56	124.58	0.895724		18.6018	187	136.532	129.697	0.856201		18.5998	187	200.515	191.845	0.9448		18.5978	187	168.812	160.819	0.891387		18.5988	187
18.6996	188	657.023	650.064	0.917573		18.6986	188	470.014	462.05	0.900366		18.6934	188	239.476	232.345	0.879167		18.7006	188	297.226	284.295	0.91946		18.6996	188	132.403	122.423	0.880215		18.6996	188	138.075	131.24	0.866387		18.6996	188	200.228	191.558	0.943386		18.6986	188	165.853	157.86	0.874986		18.6976	188
18.7985	189	638.37	631.411	0.891244		18.8005	189	474.811	466.847	0.909714		18.7953	189	242.46	235.329	0.890458		18.8005	189	301.602	288.671	0.933612		18.8005	189	136.67	126.69	0.910895		18.7995	189	132.305	125.47	0.828296		18.7995	189	200.936	192.266	0.946873		18.7975	189	175.635	167.642	0.929206		18.7995	189
18.8983	190	671.9	664.941	0.938572		18.9003	190	463.097	455.133	0.886888		18.8943	190	240.978	233.847	0.88485		18.8983	190	300.169	287.238	0.928978		18.8983	190	137.089	127.109	0.913908		18.9013	190	132.621	125.786	0.830382		18.8983	190	191.109	182.439	0.898477		18.8993	190	171.665	163.672	0.907201		18.8993	190
19.0002	191	656.356	649.397	0.916632		18.9992	191	459.429	451.465	0.87974		18.9952	191	243.546	236.415	0.894567		19.0002	191	295.199	282.268	0.912904		19.0002	191	128.478	118.498	0.851995		19.0012	191	134.004	127.169	0.839512		19.0002	191	187.781	179.111	0.882087		18.9972	191	171.95	163.957	0.908781		18.9982	191
19.1	192	676.122	669.163	0.944532		19.099	192	475.676	467.712	0.9114		19.0942	192	248.277	241.146	0.912469		19.1	192	303.146	290.215	0.938606		19.1	192	130.864	120.884	0.86915		19.102	192	147.832	140.997	0.930799		19.098	192	194.611	185.941	0.915724		19.098	192	172.719	164.726	0.913043		19.099	192
19.1999	193	676.493	669.534	0.945055		19.1989	193	464.035	456.071	0.888715		19.1942	193	239.479	232.348	0.879178		19.2009	193	299.855	286.924	0.927962		19.1989	193	130.31	120.33	0.865167		19.1999	193	145.392	138.557	0.914691		19.1999	193	201.029	192.359	0.947331		19.1979	193	165.155	157.162	0.871117		19.1979	193
19.2987	194	678.642	671.683	0.948089		19.2987	194	479.644	471.68	0.919132		19.2941	194	245.288	238.157	0.901159		19.3007	194	301.353	288.422	0.932807		19.3007	194	128.541	118.561	0.852448		19.2997	194	140.348	133.513	0.881393		19.2997	194	190.682	182.012	0.896374		19.2977	194	168.009	160.016	0.886936		19.2997	194
19.3986	195	662.107	655.148	0.924749		19.3986	195	462.668	454.704	0.886052		19.3941	195	242.999	235.868	0.892497		19.3986	195	299.007	286.076	0.92522		19.3986	195	139.408	129.428	0.930581		19.4006	195	138.7	131.865	0.870513		19.3986	195	189.521	180.851	0.890656		19.3996	195	164.569	156.576	0.867869		19.3976	195
19.5004	196	668.131	661.172	0.933252		19.4994	196	463.575	455.611	0.887819		19.496	196	242.842	235.711	0.891903		19.5004	196	311.722	298.791	0.966342		19.5004	196	136.246	126.266	0.907846		19.5004	196	146.243	139.408	0.920309		19.4984	196	188.784	180.114	0.887027		19.4994	196	176.428	168.435	0.933601		19.4984	196
19.5993	197	684.449	677.49	0.956285		19.5993	197	461.689	453.725	0.884144		19.594	197	235.105	227.974	0.862627		19.5993	197	305.972	293.041	0.947746		19.6003	197	142.741	132.761	0.954545		19.6003	197	147.777	140.942	0.930436		19.5983	197	190.647	181.977	0.896202		19.5983	197	163.08	155.087	0.859616		19.5993	197
19.6991	198	677.703	670.744	0.946763		19.6991	198	463.176	455.212	0.887042		19.6939	198	245.425	238.294	0.901677		19.7011	198	300.255	287.324	0.929256		19.6991	198	136.081	126.101	0.90666		19.7001	198	141.722	134.887	0.890463		19.7001	198	200.989	192.319	0.947134		19.6981	198	161.136	153.143	0.848841		19.6981	198
19.799	199	668.233	661.274	0.933396		19.799	199	465.111	457.147	0.890812		19.7959	199	239.995	232.864	0.88113		19.801	199	299.273	286.342	0.92608		19.801	199	140.935	130.955	0.94156		19.8	199	139.707	132.872	0.877161		19.799	199	194.234	185.564	0.913867		19.798	199	165.548	157.555	0.873296		19.798	199
19.8988	200	662.479	655.52	0.925274		19.8988	200	473.712	465.748	0.907572		19.8938	200	246.308	239.177	0.905018		19.8988	200	301.825	288.894	0.934334		19.8988	200	142.415	132.435	0.952201		19.8998	200	142.009	135.174	0.892358		19.8988	200	202.243	193.573	0.95331		19.8978	200	168.421	160.428	0.88922		19.8978	200
[truncated: 12 more columns]

## Sheet: CSA 3hUV
Cell 01						Cell 02						Cell 03						Cell 04						Cell 05						Cell 06						Cell 07						Cell 08						Cell 09
	paste BG		average pre-bleach				paste BG		average pre-bleach				paste BG		average pre-bleach				paste BG		average pre-bleach				paste BG		average pre-bleach				paste BG		average pre-bleach				paste BG		average pre-bleach				paste BG		average pre-bleach				paste BG
	1	7.018	359.818				1	6.261	417.951				1	7.119	211.379				1	7.54	190.043				1	10.355	207.538				1	7.672	161.626				1	9.508	232.805				2	13.827	194.946				1
	paste FRAP	RAW					paste FRAP	RAW					paste FRAP	RAW					paste FRAP	RAW					paste FRAP	RAW					paste FRAP	RAW					paste FRAP	RAW					paste FRAP	RAW					paste FRAP
Time	data here		minus BG	Normalized		Time	data here		minus BG	Normalized		Time	data here		minus BG	Normalized		Time	data here		minus BG	Normalized		Time	data here		minus BG	Normalized		Time	data here		minus BG	Normalized		Time	data here		minus BG	Normalized		Time	data here		minus BG	Normalized		Time	data here
0	1	386.43	379.412	1.05446		0	1	448.125	441.864	1.05722		0	1	241.333	234.214	1.10803		0	1	212.473	204.933	1.07835		0	1	235.076	224.721	1.08279		0	1	176.561	168.889	1.04494		0	1	272.596	263.088	1.13008		0	1	231.603	217.776	1.11711		0	1
0.0798342	2	384.038	377.02	1.04781		0.0798342	2	436.42	430.159	1.02921		0.0798342	2	224.799	217.68	1.02981		0.0798342	2	216.483	208.943	1.09945		0.0798342	2	235.84	225.485	1.08648		0.0798342	2	169.379	161.707	1.0005		0.0798342	2	260.036	250.528	1.07613		0.0817251	2	216.375	202.548	1.039		0.0817251	2
0.172676	3	373.148	366.13	1.01754		0.171676	3	436.717	430.456	1.02992		0.171676	3	230.519	223.4	1.05687		0.171676	3	209.502	201.962	1.06272		0.171676	3	222.33	211.975	1.02138		0.171676	3	180.029	172.357	1.06639		0.171676	3	253.276	243.768	1.04709		0.168453	3	209.679	195.852	1.00465		0.171455	3
0.271522	4	365.535	358.517	0.996385		0.270521	4	417.387	411.126	0.983672		0.271522	4	229.347	222.228	1.05132		0.271522	4	209.971	202.431	1.06519		0.271522	4	225.642	215.287	1.03734		0.271522	4	179.767	172.095	1.06477		0.271522	4	254.779	245.271	1.05355		0.27019	4	216.237	202.41	1.03829		0.272192	4
0.371368	5	370.709	363.691	1.01076		0.371368	5	441.655	435.394	1.04174		0.371368	5	222.027	214.908	1.0167		0.371368	5	201.717	194.177	1.02175		0.371368	5	225.066	214.711	1.03456		0.371368	5	174.438	166.766	1.0318		0.371368	5	253.207	243.699	1.0468		0.369926	5	205.272	191.445	0.982042		0.373929	5
0.471215	6	355.26	348.242	0.967829		0.472215	6	434.143	427.882	1.02376		0.471215	6	232.845	225.726	1.06787		0.471215	6	202.08	194.54	1.02366		0.473216	6	230.591	220.236	1.06118		0.471215	6	168.771	161.099	0.996739		0.472215	6	251.632	242.124	1.04003		0.470663	6	207.203	193.376	0.991947		0.473665	6
0.572061	7	360.372	353.354	0.982036		0.572061	7	439.317	433.056	1.03614		0.571061	7	217.738	210.619	0.996405		0.572061	7	198.596	191.056	1.00533		0.572061	7	218.125	207.77	1.00112		0.572061	7	167.905	160.233	0.991381		0.572061	7	245.634	236.126	1.01427		0.570399	7	207.222	193.395	0.992044		0.5724	7
0.671908	8	359.173	352.155	0.978704		0.671908	8	418.541	412.28	0.986433		0.671908	8	223.177	216.058	1.02214		0.671908	8	199.024	191.484	1.00758		0.671908	8	215.703	205.348	0.989447		0.671908	8	171.551	163.879	1.01394		0.671908	8	240.291	230.783	0.991316		0.670135	8	215.76	201.933	1.03584		0.672136	8
0.771754	9	357.606	350.588	0.974349		0.770753	9	430.395	424.134	1.01479		0.772755	9	225.338	218.219	1.03236		0.771754	9	201.839	194.299	1.0224		0.771754	9	220.827	210.472	1.01414		0.771754	9	174.583	166.911	1.0327		0.771754	9	241.98	232.472	0.998571		0.770872	9	221.061	207.234	1.06303		0.771872	9
0.8716	10	338.552	331.534	0.921394		0.8716	10	434.822	428.561	1.02539		0.8716	10	226.781	219.662	1.03919		0.8716	10	197.361	189.821	0.998833		0.8716	10	234.008	223.653	1.07765		0.8716	10	176.688	169.016	1.04572		0.8716	10	250.313	240.805	1.03437		0.870608	10	212.428	198.601	1.01875		0.872609	10
0.971447	11	356.766	349.748	0.972014		0.970446	11	420.71	414.449	0.991622		0.971447	11	220.279	213.16	1.00843		0.971447	11	198.791	191.251	1.00636		0.972447	11	227.397	217.042	1.04579		0.971447	11	167.25	159.578	0.987329		0.971447	11	243.395	233.887	1.00465		0.970344	11	201.937	188.11	0.964934		0.972345	11
1.07229	12	370.472	363.454	1.01011		1.07229	12	438.702	432.441	1.03467		1.07129	12	222.533	215.414	1.01909		1.07129	12	192.156	184.616	0.971444		1.07229	12	228.879	218.524	1.05293		1.07229	12	172.643	164.971	1.0207		1.07229	12	243.968	234.46	1.00711		1.07108	12	207.412	193.585	0.993019		1.07208	12
[truncated: 188 more rows]
[truncated: 12 more columns]

## Sheet: CSA 16hUV
Cell 00						Cell 01						Cell 02						Cell 03						Cell 04						Cell 05						Cell 06						Cell 07						Cell 08
[truncated: 204 more rows]
[truncated: 12 more columns]

[truncated: 5 more sheets: CSA 24hUV, CSB No UV, CSB 3hUV, CSB 16hUV, CSB 24hUV]
