# Supplementary material for: XAB2 dynamics during DNA damage-dependent transcription inhibition
Source: eLife. 2022 Jul 26;11:e77094. doi: 10.7554/eLife.77094 (PMC9436415; doi:10.7554/eLife.77094)
Supplement: Figure 4—source data 3. [file elife-77094-fig4-data3.xlsx]

## Sheet: MRC5 XAB2-GFP NT
						average pre bleach						0
background	25						610.504	575.404	383.698	648.885
temps	4	5	6	7		temps	4	5	6	7		temps	4	5	6	7	moyenne	ecart	SEM	SEM
0	687.482	645.285	451.299	731.469		0	662.482	620.285	426.299	706.469		0	1.08514	1.078	1.11103	1.08874	1.09073	0.0142501	0.00712505	0.00712505
0.0384108	678.591	634.632	432.628	719.214		0.0384108	653.591	609.632	407.628	694.214		0.0384108	1.07058	1.05949	1.06237	1.06986	1.06557	0.00549968	0.00274984
0.0605276	665.761	636.789	429.971	709.446		0.0605276	640.761	611.789	404.971	684.446		0.0605276	1.04956	1.06323	1.05544	1.0548	1.05576	0.00563623	0.00281811
0.0989384	665.778	625.621	426.346	701.255		0.0989384	640.778	600.621	401.346	676.255		0.0989384	1.04959	1.04383	1.04599	1.04218	1.0454	0.00320141	0.0016007
0.121055	655.388	635.344	422.793	700.17		0.121055	630.388	610.344	397.793	675.17		0.121055	1.03257	1.06072	1.03673	1.04051	1.04263	0.0124875	0.00624375	0.00624375
0.159466	659.632	626.392	422.411	686.986		0.159466	634.632	601.392	397.411	661.986		0.159466	1.03952	1.04517	1.03574	1.02019	1.03515	0.0107012	0.00535062
0.181583	658.789	616.971	417.016	703.69		0.181583	633.789	591.971	392.016	678.69		0.181583	1.03814	1.02879	1.02168	1.04593	1.03364	0.0106143	0.00530714
0.219994	651.717	622.803	424.766	688.154		0.219994	626.717	597.803	399.766	663.154		0.219994	1.02656	1.03893	1.04188	1.02199	1.03234	0.00957208	0.00478604
0.24211	651.3	617.228	420.966	687.047		0.24211	626.3	592.228	395.966	662.047		0.24211	1.02587	1.02924	1.03197	1.02028	1.02684	0.00503316	0.00251658	0.00251658
0.280521	650.74	609.326	414.453	690.608		0.280521	625.74	584.326	389.453	665.608		0.280521	1.02496	1.01551	1.015	1.02577	1.02031	0.00585189	0.00292595
0.302638	650.603	614.133	420.183	690.613		0.302638	625.603	589.133	395.183	665.613		0.302638	1.02473	1.02386	1.02993	1.02578	1.02608	0.00268735	0.00134367
0.341049	642.187	619.502	410.844	681.652		0.341049	617.187	594.502	385.844	656.652		0.341049	1.01095	1.03319	1.00559	1.01197	1.01543	0.0121697	0.00608483
0.363166	641.846	610.934	420.515	673.413		0.363166	616.846	585.934	395.515	648.413		0.363166	1.01039	1.0183	1.0308	0.999273	1.01469	0.0132745	0.00663725	0.00663725
0.401576	648.512	620.888	408.515	676.13		0.401576	623.512	595.888	383.515	651.13		0.401576	1.02131	1.0356	0.999522	1.00346	1.01497	0.0167019	0.00835096
0.42738	635.329	611.562	411.987	664.716		0.42738	610.329	586.562	386.987	639.716		0.42738	0.999714	1.01939	1.00857	0.98587	1.00339	0.0141817	0.00709084
0.46579	628.71	609.989	413.942	667.286		0.46579	603.71	584.989	388.942	642.286		0.46579	0.988872	1.01666	1.01367	0.989831	1.00226	0.0149568	0.00747842
0.487907	627.539	600.783	410.044	684.243		0.487907	602.539	575.783	385.044	659.243		0.487907	0.986954	1.00066	1.00351	1.01596	1.00177	0.0119053	0.00595267	0.00595267
0.526318	640.529	604.564	409.165	669.585		0.526318	615.529	579.564	384.165	644.585		0.526318	1.00823	1.00723	1.00122	0.993374	1.00251	0.00683522	0.00341761
0.553965	632.856	604.362	404.541	676.398		0.553965	607.856	579.362	379.541	651.398		0.553965	0.995663	1.00688	0.989165	1.00387	0.998895	0.00803421	0.0040171
0.592375	638.064	608.247	411.291	682.831		0.592375	613.064	583.247	386.291	657.831		0.592375	1.00419	1.01363	1.00676	1.01379	1.00959	0.00486786	0.00243393
0.614492	636.656	610.494	415.302	680.532		0.614492	611.656	585.494	390.302	655.532		0.614492	1.00189	1.01754	1.01721	1.01024	1.01172	0.00736704	0.00368352	0.00368352
0.652903	628.663	602.247	411.828	679.752		0.652903	603.663	577.247	386.828	654.752		0.652903	0.988795	1.0032	1.00816	1.00904	1.0023	0.00936214	0.00468107
0.678706	630.57	609.382	404.666	668.125		0.678706	605.57	584.382	379.666	643.125		0.678706	0.991919	1.0156	0.989491	0.991124	0.997034	0.0124206	0.0062103
0.717117	629.233	602.054	406.908	685.227		0.717117	604.233	577.054	381.908	660.227		0.717117	0.989729	1.00287	0.995334	1.01748	1.00135	0.0120238	0.00601191
0.739234	633.287	600.888	412.011	674.941		0.739234	608.287	575.888	387.011	649.941		0.739234	0.996369	1.00084	1.00863	1.00163	1.00187	0.00507007	0.00253503	0.00253503
0.777645	632.927	602.44	410.773	672.087		0.777645	607.927	577.44	385.773	647.087		0.777645	0.99578	1.00354	1.00541	0.99723	1.00049	0.00470062	0.00235031
0.803448	631.116	602.885	405.205	684.685		0.803448	606.116	577.885	380.205	659.685		0.803448	0.992813	1.00431	0.990895	1.01664	1.00117	0.0118987	0.00594933
0.841859	637.035	601.966	412.293	685.529		0.841859	612.035	576.966	387.293	660.529		0.841859	1.00251	1.00271	1.00937	1.01795	1.00813	0.00727541	0.00363771
0.863975	634.731	600.835	399.451	666.976		0.863975	609.731	575.835	374.451	641.976		0.863975	0.998735	1.00075	0.975899	0.989353	0.991184	0.0113355	0.00566776	0.00566776
0.902386	642.03	604.172	410.394	672.375		0.902386	617.03	579.172	385.394	647.375		0.902386	1.01069	1.00655	1.00442	0.997673	1.00483	0.00543697	0.00271848
0.928189	628.515	599.023	406.419	676.951		0.928189	603.515	574.023	381.419	651.951		0.928189	0.988553	0.9976	0.994059	1.00473	0.996234	0.00677502	0.00338751
0.9666	638.164	602.529	412.326	669.831		0.9666	613.164	577.529	387.326	644.831		0.9666	1.00436	1.00369	1.00945	0.993753	1.00281	0.00656643	0.00328321
0.988717	642.763	588.038	406.322	668.669		0.988717	617.763	563.038	381.322	643.669		0.988717	1.01189	0.978509	0.993807	0.991962	0.994042	0.0137141	0.00685705	0.00685705
1.02713	638.449	602.23	413.417	673.561		1.02713	613.449	577.23	388.417	648.561		1.02713	1.00482	1.00317	1.0123	0.999501	1.00495	0.00538047	0.00269024
1.05293	636.929	603.13	408.691	670.562		1.05293	611.929	578.13	383.691	645.562		1.05293	1.00233	1.00474	0.999981	0.994879	1.00048	0.00421052	0.00210526
1.09134	634.055	595.298	408.802	671.343		1.09134	609.055	570.298	383.802	646.343		1.09134	0.997627	0.991127	1.00027	0.996083	0.996277	0.00384413	0.00192207
1.11346	621.775	596.293	404.593	662.088		1.11346	596.775	571.293	379.593	637.088		1.11346	0.977513	0.992856	0.9893	0.98182	0.985372	0.00697193	0.00348596	0.00348596
1.15187	634.633	596.213	409.442	671.212		1.15187	609.633	571.213	384.442	646.212		1.15187	0.998574	0.992717	1.00194	0.995881	0.997277	0.00392222	0.00196111
1.17767	627.806	601.767	406.281	666.982		1.17767	602.806	576.767	381.281	641.982		1.17767	0.987391	1.00237	0.9937	0.989362	0.993206	0.00665304	0.00332652
1.21608	632.742	604.73	401.146	670.164		1.21608	607.742	579.73	376.146	645.164		1.21608	0.995477	1.00752	0.980317	0.994266	0.994394	0.0111297	0.00556483
1.2382	633.363	601.056	410.365	665.133		1.2382	608.363	576.056	385.365	640.133		1.2382	0.996494	1.00113	1.00434	0.986513	0.997121	0.00777158	0.00388579	0.00388579
1.27661	636.628	597.633	409.075	673.299		1.27661	611.628	572.633	384.075	648.299		1.27661	1.00184	0.995185	1.00098	0.999097	0.999276	0.00295883	0.00147941
1.30241	632.58	597.887	410.161	668.303		1.30241	607.58	572.887	385.161	643.303		1.30241	0.995211	0.995626	1.00381	0.991398	0.996512	0.00522548	0.00261274
1.34083	633.723	599.493	398.9	670.305		1.34083	608.723	574.493	373.9	645.305		1.34083	0.997083	0.998417	0.974463	0.994483	0.991112	0.0112186	0.00560929
1.36294	632.199	597.993	410.665	676.77		1.36294	607.199	572.993	385.665	651.77		1.36294	0.994587	0.99581	1.00513	1.00445	0.999992	0.00556461	0.0027823	0.0027823
1.40135	636.628	591.595	417.517	681.044		1.40135	611.628	566.595	392.517	656.044		1.40135	1.00184	0.984691	1.02298	1.01103	1.00514	0.0161467	0.00807334
1.429	632.947	590.966	408.552	656.705		1.429	607.947	565.966	383.552	631.705		1.429	0.995812	0.983598	0.999618	0.973524	0.988138	0.0119005	0.00595027
1.46741	638.729	592.424	406.387	668.99		1.46741	613.729	567.424	381.387	643.99		1.46741	1.00528	0.986132	0.993976	0.992457	0.994462	0.0079739	0.00398695
1.48953	634.611	595.298	409.45	672.935		1.48953	609.611	570.298	384.45	647.935		1.48953	0.998538	0.991127	1.00196	0.998536	0.99754	0.00456973	0.00228487	0.00228487
1.52794	640.327	583.605	412.523	662.465		1.52794	615.327	558.605	387.523	637.465		1.52794	1.0079	0.970805	1.00997	0.982401	0.992769	0.0192758	0.0096379
1.55374	636.555	596.795	406.693	659.844		1.55374	611.555	571.795	381.693	634.844		1.55374	1.00172	0.993728	0.994773	0.978362	0.992146	0.0098508	0.0049254
1.59215	635.021	591.437	406.279	665.016		1.59215	610.021	566.437	381.279	640.016		1.59215	0.99921	0.984416	0.993695	0.986332	0.990913	0.00682536	0.00341268
1.61427	626.904	599.727	406.163	673.919		1.61427	601.904	574.727	381.163	648.919		1.61427	0.985914	0.998824	0.993392	1.00005	0.994546	0.00644122	0.00322061	0.00322061
1.65268	631.024	592.082	414.09	673.071		1.65268	606.024	567.082	389.09	648.071		1.65268	0.992663	0.985537	1.01405	0.998746	0.997749	0.0121349	0.00606744
1.67848	636.187	589.124	409.04	667.691		1.67848	611.187	564.124	384.04	642.691		1.67848	1.00112	0.980397	1.00089	0.990455	0.993215	0.009888	0.004944
1.71689	626.201	592.839	406.462	671.925		1.71689	601.201	567.839	381.462	646.925		1.71689	0.984762	0.986853	0.994171	0.99698	0.990692	0.00581784	0.00290892
1.73901	636.64	606.172	400.576	676.777		1.73901	611.64	581.172	375.576	651.777		1.73901	1.00186	1.01002	0.978831	1.00446	0.998794	0.0137371	0.00686853	0.00686853
1.77742	636.933	594.282	397.594	666.855		1.77742	611.933	569.282	372.594	641.855		1.77742	1.00234	0.989361	0.97106	0.989167	0.987982	0.0128565	0.00642824
1.80322	635.117	590.089	406.665	667.837		1.80322	610.117	565.089	381.665	642.837		1.80322	0.999367	0.982074	0.9947	0.99068	0.991705	0.00733685	0.00366843
1.84163	633.499	588.494	407.52	663.352		1.84163	608.499	563.494	382.52	638.352		1.84163	0.996717	0.979302	0.996929	0.983768	0.989179	0.00901318	0.00450659
1.86375	636.83	594.199	407.356	671.825		1.86375	611.83	569.199	382.356	646.825		1.86375	1.00217	0.989217	0.996501	0.996826	0.996179	0.00532047	0.00266024	0.00266024
1.90216	628.65	580.519	399.884	668.077		1.90216	603.65	555.519	374.884	643.077		1.90216	0.988774	0.965442	0.977028	0.99105	0.980573	0.0118115	0.00590575
1.92797	627.1	590.625	403.177	676.09		1.92797	602.1	565.625	378.177	651.09		1.92797	0.986235	0.983005	0.98561	1.0034	0.989562	0.00932971	0.00466485
1.96638	628.203	592.81	404.086	672.795		1.96638	603.203	567.81	379.086	647.795		1.96638	0.988042	0.986803	0.987979	0.998321	0.990286	0.00538668	0.00269334
1.98849	634.072	589.81	403.285	665.509		1.98849	609.072	564.81	378.285	640.509		1.98849	0.997655	0.981589	0.985891	0.987092	0.988057	0.00682106	0.00341053	0.00341053
2.0269	629.817	600.971	404.239	687.762		2.0269	604.817	575.971	379.239	662.762		2.0269	0.990685	1.00099	0.988378	1.02139	1.00036	0.0150518	0.00752591
2.05271	628	597.171	398.176	674.776		2.05271	603	572.171	373.176	649.776		2.05271	0.987709	0.994382	0.972576	1.00137	0.98901	0.0122946	0.00614729
2.09112	639.645	589.206	399.505	666.936		2.09112	614.645	564.206	374.505	641.936		2.09112	1.00678	0.980539	0.97604	0.989291	0.988164	0.0135781	0.00678903
2.11323	622.198	595.528	401.889	671.035		2.11323	597.198	570.528	376.889	646.035		2.11323	0.978206	0.991526	0.982253	0.995608	0.986898	0.00805032	0.00402516	0.00402516
2.15165	636.657	585.966	405.904	664.035		2.15165	611.657	560.966	380.904	639.035		2.15165	1.00189	0.974908	0.992717	0.984821	0.988584	0.011479	0.00573949
2.17745	625.268	596.988	407.248	659.928		2.17745	600.268	571.988	382.248	634.928		2.17745	0.983234	0.994064	0.99622	0.978491	0.988002	0.00851396	0.00425698
2.21586	636.455	597.813	416.77	676.787		2.21586	611.455	572.813	391.77	651.787		2.21586	1.00156	0.995497	1.02104	1.00447	1.00564	0.0109231	0.00546153
2.23798	634.198	594.421	399.62	668.849		2.23798	609.198	569.421	374.62	643.849		2.23798	0.997862	0.989602	0.97634	0.992239	0.989011	0.0091226	0.0045613	0.0045613
2.27639	626.574	605.596	403.577	660.513		2.27639	601.574	580.596	378.577	635.513		2.27639	0.985373	1.00902	0.986653	0.979393	0.990111	0.0129996	0.00649979
2.30403	626.985	599.642	397.722	653.86		2.30403	601.985	574.642	372.722	628.86		2.30403	0.986047	0.998676	0.971393	0.96914	0.981314	0.0137897	0.00689487
2.34244	628.38	602.698	406.602	665.265		2.34244	603.38	577.698	381.602	640.265		2.34244	0.988332	1.00399	0.994536	0.986716	0.993393	0.00782599	0.003913
2.36456	628.9	593.224	404.292	663.932		2.36456	603.9	568.224	379.292	638.932		2.36456	0.989183	0.987522	0.988516	0.984662	0.987471	0.00199316	0.000996581	0.000996581
2.40297	632.708	590.565	409.302	673.141		2.40297	607.708	565.565	384.302	648.141		2.40297	0.995421	0.982901	1.00157	0.998854	0.994687	0.00825085	0.00412543
2.42878	634.831	589.745	403.002	665.606		2.42878	609.831	564.745	378.002	640.606		2.42878	0.998898	0.981476	0.985154	0.987242	0.988192	0.00752473	0.00376236
2.46719	629.545	596.279	401.706	672.323		2.46719	604.545	571.279	376.706	647.323		2.46719	0.99024	0.992831	0.981776	0.997593	0.99061	0.00663005	0.00331502
2.4893	627.541	590.442	402.671	656.408		2.4893	602.541	565.442	377.671	631.408		2.4893	0.986957	0.982687	0.984291	0.973067	0.981751	0.0060513	0.00302565	0.00302565
2.52771	626.706	599.025	404.774	670.209		2.52771	601.706	574.025	379.774	645.209		2.52771	0.98559	0.997604	0.989772	0.994335	0.991825	0.00525323	0.00262662
2.55352	625.931	599.093	408.485	670.905		2.55352	600.931	574.093	383.485	645.905		2.55352	0.98432	0.997722	0.999444	0.995408	0.994223	0.00680608	0.00340304
2.59193	623.83	596.792	402.183	666.367		2.59193	598.83	571.792	377.183	641.367		2.59193	0.980879	0.993723	0.983019	0.988414	0.986509	0.00576045	0.00288022
2.61404	627.946	592.102	406.634	676.803		2.61404	602.946	567.102	381.634	651.803		2.61404	0.987621	0.985572	0.99462	1.0045	0.993078	0.00854205	0.00427102	0.00427102
2.65246	626.202	598.032	406.487	671.82		2.65246	601.202	573.032	381.487	646.82		2.65246	0.984764	0.995878	0.994237	0.996818	0.992924	0.00554367	0.00277183
2.67826	628.263	592.742	404.922	676.521		2.67826	603.263	567.742	379.922	651.521		2.67826	0.98814	0.986684	0.990158	1.00406	0.992261	0.00799558	0.00399779
2.71667	631.012	586.735	398.521	668.276		2.71667	606.012	561.735	373.521	643.276		2.71667	0.992643	0.976245	0.973475	0.991356	0.98343	0.00997371	0.00498685
2.73879	636.959	592.531	400.638	677.29		2.73879	611.959	567.531	375.638	652.29		2.73879	1.00238	0.986318	0.978993	1.00525	0.993236	0.012632	0.00631601	0.00631601
2.7772	629.56	595.499	402.697	662.394		2.7772	604.56	570.499	377.697	637.394		2.7772	0.990264	0.991476	0.984359	0.982292	0.987098	0.00446449	0.00223225
2.803	628.75	592.984	403.568	676.151		2.803	603.75	567.984	378.568	651.151		2.803	0.988938	0.987105	0.986629	1.00349	0.991541	0.00802962	0.00401481
2.84141	632.58	595.989	407.228	667.214		2.84141	607.58	570.989	382.228	642.214		2.84141	0.995211	0.992327	0.996168	0.98972	0.993357	0.00292279	0.00146139
2.86353	626.404	595.261	401.43	665.823		2.86353	601.404	570.261	376.43	640.823		2.86353	0.985095	0.991062	0.981057	0.987576	0.986198	0.00421136	0.00210568	0.00210568
2.90194	627.268	590.071	410.724	666.54		2.90194	602.268	565.071	385.724	641.54		2.90194	0.98651	0.982042	1.00528	0.988681	0.990628	0.0101508	0.00507538
2.92774	624.184	590.853	406.373	669.412		2.92774	599.184	565.853	381.373	644.412		2.92774	0.981459	0.983402	0.993939	0.993107	0.987977	0.00646255	0.00323127
2.96615	634.196	585.476	408.616	666.429		2.96615	609.196	560.476	383.616	641.429		2.96615	0.997858	0.974057	0.999785	0.98851	0.990053	0.0117459	0.00587294
2.98827	622.25	591.713	407.824	667.734		2.98827	597.25	566.713	382.824	642.734		2.98827	0.978291	0.984896	0.997721	0.990521	0.987857	0.0082599	0.00412995	0.00412995
3.02668	632.471	594.363	402.154	663.184		3.02668	607.471	569.363	377.154	638.184		3.02668	0.995033	0.989502	0.982944	0.983509	0.987747	0.00569179	0.00284589
3.05248	625.209	593.436	406.838	668.283		3.05248	600.209	568.436	381.838	643.283		3.05248	0.983138	0.987891	0.995151	0.991367	0.989387	0.00511351	0.00255675
3.09089	628.83	592.508	395.109	662.926		3.09089	603.83	567.508	370.109	637.926		3.09089	0.989069	0.986278	0.964583	0.983112	0.98076	0.011056	0.00552798
3.18779	341.277	353.178	236.723	408.403		3.18779	316.277	328.178	211.723	383.403		3.18779	0.518059	0.570344	0.551795	0.590865	0.557766	0.0309084	0.0154542	0.0154542
3.2262	429.479	426.333	284.067	492.499		3.2262	404.479	401.333	259.067	467.499		3.2262	0.662533	0.697481	0.675184	0.720465	0.688916	0.0255169	0.0127584
3.24832	436.553	433.255	287.884	517.795		3.24832	411.553	408.255	262.884	492.795		3.24832	0.674121	0.70951	0.685132	0.759449	0.707053	0.0379319	0.018966
3.28673	451.882	442.94	296.33	537.206		3.28673	426.882	417.94	271.33	512.206		3.28673	0.699229	0.726342	0.707144	0.789364	0.73052	0.0408476	0.0204238
3.30885	463.305	458.819	305.475	536.209		3.30885	438.305	433.819	280.475	511.209		3.30885	0.71794	0.753938	0.730978	0.787827	0.747671	0.0306289	0.0153145	0.0153145
3.34726	478.537	459.65	305.679	547.669		3.34726	453.537	434.65	280.679	522.669		3.34726	0.74289	0.755383	0.731509	0.805488	0.758818	0.0326056	0.0163028
3.36938	481.405	459.841	314.119	558.148		3.36938	456.405	434.841	289.119	533.148		3.36938	0.747588	0.755714	0.753506	0.821638	0.769611	0.0348534	0.0174267
3.40779	485.568	477.567	320.512	545.146		3.40779	460.568	452.567	295.512	520.146		3.40779	0.754407	0.786521	0.770167	0.8016	0.778174	0.0203915	0.0101957
3.4299	492.144	469.334	316.191	554.822		3.4299	467.144	444.334	291.191	529.822		3.4299	0.765178	0.772212	0.758906	0.816512	0.778202	0.0261118	0.0130559	0.0130559
3.46831	501.974	481.752	322.024	573.512		3.46831	476.974	456.752	297.024	548.512		3.46831	0.78128	0.793794	0.774108	0.845315	0.798624	0.0321727	0.0160864
3.49043	507.455	476.34	325.002	571.374		3.49043	482.455	451.34	300.002	546.374		3.49043	0.790257	0.784388	0.781869	0.84202	0.799634	0.0284753	0.0142376
3.52884	505.5	485.281	331.283	578.509		3.52884	480.5	460.281	306.283	553.509		3.52884	0.787055	0.799927	0.798239	0.853016	0.809559	0.0295288	0.0147644
3.55096	505.379	489.577	328.234	567.385		3.55096	480.379	464.577	303.234	542.385		3.55096	0.786857	0.807393	0.790293	0.835873	0.805104	0.0223926	0.0111963	0.0111963
3.58937	513.658	500.769	335.753	578.218		3.58937	488.658	475.769	310.753	553.218		3.58937	0.800418	0.826844	0.809889	0.852568	0.822429	0.0228733	0.0114367
3.61517	510.993	493.163	328.297	582.762		3.61517	485.993	468.163	303.297	557.762		3.61517	0.796053	0.813625	0.790457	0.85957	0.814926	0.0313568	0.0156784
3.65358	516.173	501.098	337.053	585.027		3.65358	491.173	476.098	312.053	560.027		3.65358	0.804537	0.827415	0.813277	0.863061	0.827073	0.0257775	0.0128887
3.6757	515.449	508.201	332.09	579.07		3.6757	490.449	483.201	307.09	554.07		3.6757	0.803352	0.83976	0.800342	0.853881	0.824334	0.026626	0.013313	0.013313
3.71411	514.075	503.624	337.544	595.4		3.71411	489.075	478.624	312.544	570.4		3.71411	0.801101	0.831805	0.814556	0.879047	0.831627	0.0340192	0.0170096
3.74176	530.715	501.535	340.451	590.288		3.74176	505.715	476.535	315.451	565.288		3.74176	0.828357	0.828175	0.822133	0.871169	0.837458	0.0226589	0.0113294
3.78017	523.442	516.52	342.875	595.293		3.78017	498.442	491.52	317.875	570.293		3.78017	0.816444	0.854217	0.82845	0.878882	0.844498	0.0278165	0.0139083
3.80229	529.685	504.947	344.36	606.189		3.80229	504.685	479.947	319.36	581.189		3.80229	0.82667	0.834105	0.83232	0.895674	0.847192	0.032476	0.016238	0.016238
3.8407	526.615	512.517	347.377	597.199		3.8407	501.615	487.517	322.377	572.199		3.8407	0.821641	0.847261	0.840183	0.881819	0.847726	0.0251652	0.0125826
3.8665	534.176	523.468	345.216	599.8		3.8665	509.176	498.468	320.216	574.8		3.8665	0.834026	0.866292	0.834551	0.885828	0.855174	0.025402	0.012701
3.90491	528.744	522.543	336.227	599.819		3.90491	503.744	497.543	311.227	574.819		3.90491	0.825129	0.864685	0.811124	0.885857	0.846699	0.0345818	0.0172909
3.92703	527.852	514.267	344.867	609.706		3.92703	502.852	489.267	319.867	584.706		3.92703	0.823668	0.850302	0.833642	0.901094	0.852176	0.0344128	0.0172064	0.0172064
3.96544	535.016	514.678	350.765	601.997		3.96544	510.016	489.678	325.765	576.997		3.96544	0.835402	0.851016	0.849013	0.889213	0.856161	0.0231009	0.0115505
3.99124	524.473	521.19	344.558	599.072		3.99124	499.473	496.19	319.558	574.072		3.99124	0.818133	0.862334	0.832836	0.884706	0.849502	0.0298089	0.0149045
4.02965	530.564	523.598	352.122	613.242		4.02965	505.564	498.598	327.122	588.242		4.02965	0.82811	0.866518	0.85255	0.906543	0.86343	0.0328338	0.0164169
4.05177	538.378	515.622	346.187	605.775		4.05177	513.378	490.622	321.187	580.775		4.05177	0.840909	0.852657	0.837082	0.895036	0.856421	0.0265825	0.0132913	0.0132913
4.09018	538.941	510.48	346.38	614.623		4.09018	513.941	485.48	321.38	589.623		4.09018	0.841831	0.84372	0.837585	0.908671	0.857952	0.0339102	0.0169551
4.11598	533.645	524.74	341.147	608.538		4.11598	508.645	499.74	316.147	583.538		4.11598	0.833156	0.868503	0.823947	0.899294	0.856225	0.0345434	0.0172717
4.15439	541.303	515.989	347.758	606.666		4.15439	516.303	490.989	322.758	581.666		4.15439	0.8457	0.853295	0.841176	0.896409	0.859145	0.0253408	0.0126704
4.17651	545.591	525.487	346.621	617.672		4.17651	520.591	500.487	321.621	592.672		4.17651	0.852724	0.869801	0.838213	0.91337	0.868527	0.0325639	0.0162819	0.0162819
4.21492	542.471	529.659	351.428	606.659		4.21492	517.471	504.659	326.428	581.659		4.21492	0.847613	0.877052	0.850741	0.896398	0.867951	0.0231075	0.0115537
4.24072	541.467	520.449	348.083	610.306		4.24072	516.467	495.449	323.083	585.306		4.24072	0.845969	0.861046	0.842023	0.902019	0.862764	0.0274234	0.0137117
4.27913	536.364	523.469	354.948	617.469		4.27913	511.364	498.469	329.948	592.469		4.27913	0.83761	0.866294	0.859915	0.913057	0.869219	0.0317072	0.0158536
4.30125	534.067	519.918	347.489	611.869		4.30125	509.067	494.918	322.489	586.869		4.30125	0.833848	0.860123	0.840475	0.904427	0.859718	0.0318258	0.0159129	0.0159129
4.33966	542.047	523.292	360.054	610.068		4.33966	517.047	498.292	335.054	585.068		4.33966	0.846919	0.865987	0.873222	0.901652	0.871945	0.0227004	0.0113502
4.36547	546.017	515.146	358.25	611.424		4.36547	521.017	490.146	333.25	586.424		4.36547	0.853422	0.85183	0.868521	0.903741	0.869378	0.0241118	0.0120559
4.40388	542.748	533.887	348.436	606.182		4.40388	517.748	508.887	323.436	581.182		4.40388	0.848067	0.8844	0.842943	0.895663	0.867768	0.0261988	0.0130994
4.42599	547.143	534.615	350.945	612.336		4.42599	522.143	509.615	325.945	587.336		4.42599	0.855266	0.885665	0.849482	0.905147	0.87389	0.0261931	0.0130965	0.0130965
4.4644	545.518	537.044	358.996	614.893		4.4644	520.518	512.044	333.996	589.893		4.4644	0.852604	0.889886	0.870465	0.909088	0.880511	0.0243873	0.0121937
4.49021	542.318	531.825	355.993	623.418		4.49021	517.318	506.825	330.993	598.418		4.49021	0.847363	0.880816	0.862638	0.922226	0.878261	0.0323428	0.0161714
4.52862	546.447	533.641	362.349	610.488		4.52862	521.447	508.641	337.349	585.488		4.52862	0.854126	0.883972	0.879204	0.902299	0.8799	0.0198585	0.00992925
4.55073	542.16	526.959	356.175	608.283		4.55073	517.16	501.959	331.175	583.283		4.55073	0.847104	0.87236	0.863113	0.898901	0.870369	0.0216944	0.0108472	0.0108472
4.58915	545.61	527.19	355.496	615.323		4.58915	520.61	502.19	330.496	590.323		4.58915	0.852755	0.872761	0.861343	0.90975	0.874152	0.0251069	0.0125534
4.61679	537.176	528.498	360.376	607.734		4.61679	512.176	503.498	335.376	582.734		4.61679	0.83894	0.875034	0.874061	0.898055	0.871523	0.0243882	0.0121941
4.6552	547.405	533.856	357.16	613.701		4.6552	522.405	508.856	332.16	588.701		4.6552	0.855695	0.884346	0.86568	0.907251	0.878243	0.022693	0.0113465
4.67732	541.198	534.704	361.999	616.786		4.67732	516.198	509.704	336.999	591.786		4.67732	0.845528	0.88582	0.878291	0.912005	0.880411	0.0273784	0.0136892	0.0136892
4.71573	546.357	535.431	357.179	623.511		4.71573	521.357	510.431	332.179	598.511		4.71573	0.853979	0.887083	0.865729	0.922369	0.88229	0.0300282	0.0150141
4.74153	542.661	534.197	354.794	617.71		4.74153	517.661	509.197	329.794	592.71		4.74153	0.847925	0.884938	0.859514	0.913429	0.876451	0.0290977	0.0145489
4.77994	546.335	533.645	353.406	624.415		4.77994	521.335	508.645	328.406	599.415		4.77994	0.853943	0.883979	0.855896	0.923762	0.879395	0.0326061	0.016303
4.80206	542.868	528.697	353.933	619.142		4.80206	517.868	503.697	328.933	594.142		4.80206	0.848264	0.87538	0.85727	0.915636	0.874137	0.0298754	0.0149377	0.0149377
4.84047	546.422	531.103	357.84	613.735		4.84047	521.422	506.103	332.84	588.735		4.84047	0.854085	0.879561	0.867452	0.907303	0.8771	0.0226646	0.0113323
4.86628	556.28	528.949	352.985	631.679		4.86628	531.28	503.949	327.985	606.679		4.86628	0.870232	0.875818	0.854799	0.934957	0.883951	0.0351462	0.0175731
4.90469	545.32	531.834	351.317	625.342		4.90469	520.32	506.834	326.317	600.342		4.90469	0.85228	0.880832	0.850452	0.925191	0.877189	0.0348939	0.017447
4.9268	556.195	541.319	354.229	618.798		4.9268	531.195	516.319	329.229	593.798		4.9268	0.870093	0.897316	0.858041	0.915106	0.885139	0.0258647	0.0129323	0.0129323
4.96521	554.648	544.921	351.865	610.862		4.96521	529.648	519.921	326.865	585.862		4.96521	0.867559	0.903576	0.85188	0.902875	0.881473	0.0259226	0.0129613
4.99102	546.318	534.551	354.326	619.018		4.99102	521.318	509.551	329.326	594.018		4.99102	0.853915	0.885554	0.858294	0.915445	0.878302	0.0284442	0.0142221
5.02943	558.492	542.286	357.237	618.288		5.02943	533.492	517.286	332.237	593.288		5.02943	0.873856	0.898996	0.865881	0.91432	0.888263	0.0223808	0.0111904
5.05154	549.286	541.537	350.775	626.222		5.05154	524.286	516.537	325.775	601.222		5.05154	0.858776	0.897695	0.849039	0.926547	0.883014	0.0358347	0.0179174	0.0179174
5.08996	559.74	542.058	362.235	622.712		5.08996	534.74	517.058	337.235	597.712		5.08996	0.8759	0.8986	0.878906	0.921137	0.893636	0.0209165	0.0104583
5.11576	557.996	533.883	365.732	623.94		5.11576	532.996	508.883	340.732	598.94		5.11576	0.873043	0.884393	0.88802	0.92303	0.892122	0.0215706	0.0107853
5.15417	554.418	539.347	358.442	627.446		5.15417	529.418	514.347	333.442	602.446		5.15417	0.867182	0.893889	0.869021	0.928433	0.889631	0.0285916	0.0142958
5.17629	549.288	535.54	355.148	618.929		5.17629	524.288	510.54	330.148	593.929		5.17629	0.85878	0.887273	0.860436	0.915307	0.880449	0.0266568	0.0133284	0.0133284
5.2147	554.577	533.48	355.97	612.915		5.2147	529.577	508.48	330.97	587.915		5.2147	0.867443	0.883692	0.862579	0.906039	0.879938	0.0196032	0.00980158
5.2405	549.355	543.844	363.813	628.748		5.2405	524.355	518.844	338.813	603.748		5.2405	0.858889	0.901704	0.883019	0.93044	0.893513	0.0302191	0.0151096
5.27891	550.721	543.475	359.534	615.179		5.27891	525.721	518.475	334.534	590.179		5.27891	0.861127	0.901063	0.871867	0.909528	0.885896	0.0230857	0.0115428
5.30103	548.384	537.248	366.842	612.165		5.30103	523.384	512.248	341.842	587.165		5.30103	0.857299	0.890241	0.890913	0.904883	0.885834	0.0201854	0.0100927	0.0100927
5.33944	548.511	538.855	366.114	628.164		5.33944	523.511	513.855	341.114	603.164		5.33944	0.857507	0.893034	0.889016	0.92954	0.892274	0.0294882	0.0147441
5.36524	559.389	536.073	353.741	632.818		5.36524	534.389	511.073	328.741	607.818		5.36524	0.875325	0.888199	0.856769	0.936712	0.889251	0.0341694	0.0170847
5.40365	559.631	532.552	365.216	619.85		5.40365	534.631	507.552	340.216	594.85		5.40365	0.875721	0.88208	0.886676	0.916727	0.890301	0.0181808	0.00909041
5.42577	555.488	542.468	363.865	616.46		5.42577	530.488	517.468	338.865	591.46		5.42577	0.868935	0.899313	0.883155	0.911503	0.890726	0.0185972	0.00929858	0.00929858
5.46418	556.237	536.614	361.366	630.397		5.46418	531.237	511.614	336.366	605.397		5.46418	0.870162	0.889139	0.876642	0.932981	0.892231	0.0282854	0.0141427
5.49183	558.159	538.278	363.337	627.878		5.49183	533.159	513.278	338.337	602.878		5.49183	0.87331	0.892031	0.881778	0.929099	0.894055	0.0245847	0.0122924
5.53024	545.747	541.367	358.406	622.906		5.53024	520.747	516.367	333.406	597.906		5.53024	0.852979	0.897399	0.868927	0.921436	0.885186	0.0303582	0.0151791
5.55235	550.117	531.31	358.922	631.461		5.55235	525.117	506.31	333.922	606.461		5.55235	0.860137	0.879921	0.870272	0.934621	0.886238	0.0332512	0.0166256	0.0166256
5.59077	548.2	534.602	366.297	634.154		5.59077	523.2	509.602	341.297	609.154		5.59077	0.856997	0.885642	0.889493	0.938771	0.892726	0.0339474	0.0169737
5.61657	555.51	545.704	362.1	621.603		5.61657	530.51	520.704	337.1	596.603		5.61657	0.868971	0.904937	0.878555	0.919428	0.892973	0.023288	0.011644
5.65498	557.939	539.022	358.965	627.783		5.65498	532.939	514.022	333.965	602.783		5.65498	0.87295	0.893324	0.870384	0.928952	0.891403	0.0270553	0.0135276
5.6771	554.28	542.469	358.277	623.522		5.6771	529.28	517.469	333.277	598.522		5.6771	0.866956	0.899314	0.868591	0.922386	0.889312	0.0266023	0.0133012	0.0133012
5.71551	556.434	537.271	355.289	621.573		5.71551	531.434	512.271	330.289	596.573		5.71551	0.870485	0.890281	0.860804	0.919382	0.885238	0.0258583	0.0129291
5.74131	554.17	542.15	365.238	620.879		5.74131	529.17	517.15	340.238	595.879		5.74131	0.866776	0.89876	0.886733	0.918313	0.892645	0.0216053	0.0108026
5.77972	553.75	532.963	357.639	630.225		5.77972	528.75	507.963	332.639	605.225		5.77972	0.866088	0.882794	0.866928	0.932716	0.887132	0.0313461	0.015673
5.80184	557.628	541.274	355.798	629.773		5.80184	532.628	516.274	330.798	604.773		5.80184	0.87244	0.897238	0.86213	0.932019	0.890957	0.031088	0.015544	0.015544
5.84025	544.799	536.679	361.712	632.105		5.84025	519.799	511.679	336.712	607.105		5.84025	0.851427	0.889252	0.877543	0.935613	0.888459	0.0351885	0.0175942
5.86605	555.335	532.168	363.972	620.732		5.86605	530.335	507.168	338.972	595.732		5.86605	0.868685	0.881412	0.883433	0.918086	0.887904	0.021154	0.010577
5.90446	550.448	539.137	363.969	620.843		5.90446	525.448	514.137	338.969	595.843		5.90446	0.86068	0.893524	0.883426	0.918257	0.888972	0.0238716	0.0119358
5.92658	555.82	545.328	359.695	621.918		5.92658	530.82	520.328	334.695	596.918		5.92658	0.869479	0.904283	0.872287	0.919914	0.891491	0.0246633	0.0123317	0.0123317
5.96499	549.894	545.125	370.083	622.752		5.96499	524.894	520.125	345.083	597.752		5.96499	0.859772	0.90393	0.89936	0.921199	0.896065	0.025959	0.0129795
5.99079	554.433	541.755	362.246	627.606		5.99079	529.433	516.755	337.246	602.606		5.99079	0.867207	0.898074	0.878935	0.92868	0.893224	0.0268432	0.0134216
6.0292	558.675	547.977	363.591	625.52		6.0292	533.675	522.977	338.591	600.52		6.0292	0.874155	0.908887	0.88244	0.925465	0.897737	0.0236871	0.0118435
6.05132	554.78	549.959	357.802	627.166		6.05132	529.78	524.959	332.802	602.166		6.05132	0.867775	0.912331	0.867353	0.928002	0.893865	0.0310369	0.0155184	0.0155184
6.08973	553.392	547.042	361.603	623.621		6.08973	528.392	522.042	336.603	598.621		6.08973	0.865502	0.907262	0.877259	0.922538	0.89314	0.0263297	0.0131648
6.11553	556.091	539.872	354.745	631.806		6.11553	531.091	514.872	329.745	606.806		6.11553	0.869923	0.894801	0.859386	0.935152	0.889816	0.0336747	0.0168374
6.15395	555.06	544.698	357.849	626.767		6.15395	530.06	519.698	332.849	601.767		6.15395	0.868234	0.903188	0.867476	0.927387	0.891571	0.0291143	0.0145571
6.17606	549.751	542.572	366.185	623.169		6.17606	524.751	517.572	341.185	598.169		6.17606	0.859538	0.899493	0.889201	0.921842	0.892519	0.0258665	0.0129332	0.0129332
6.21447	553.875	548.428	367.066	632.856		6.21447	528.875	523.428	342.066	607.856		6.21447	0.866293	0.909671	0.891497	0.93677	0.901058	0.0297185	0.0148593
6.24028	569.187	544.74	359.743	625.725		6.24028	544.187	519.74	334.743	600.725		6.24028	0.891374	0.903261	0.872412	0.925781	0.898207	0.0223454	0.0111727
6.27869	567.511	554.847	361.7	626.814		6.27869	542.511	529.847	336.7	601.814		6.27869	0.888629	0.920826	0.877512	0.927459	0.903607	0.0242949	0.0121474
6.3008	563.957	552.695	360	624.847		6.3008	538.957	527.695	335	599.847		6.3008	0.882807	0.917086	0.873082	0.924428	0.899351	0.0252135	0.0126068	0.0126068
6.33921	551.151	549.502	364.054	634.458		6.33921	526.151	524.502	339.054	609.458		6.33921	0.861831	0.911537	0.883647	0.939239	0.899064	0.0336333	0.0168167
6.36686	565.815	546.63	361.734	630.605		6.36686	540.815	521.63	336.734	605.605		6.36686	0.885851	0.906546	0.877601	0.933301	0.900825	0.0248398	0.0124199
6.40527	553.819	550.906	367.625	637.284		6.40527	528.819	525.906	342.625	612.284		6.40527	0.866201	0.913977	0.892954	0.943594	0.904182	0.032751	0.0163755
6.42739	563.46	550.642	359.252	626.598		6.42739	538.46	525.642	334.252	601.598		6.42739	0.881993	0.913518	0.871132	0.927126	0.898442	0.0262455	0.0131227	0.0131227
6.4658	555.662	553.597	364.386	620.344		6.4658	530.662	528.597	339.386	595.344		6.4658	0.86922	0.918654	0.884512	0.917488	0.897469	0.0245997	0.0122999
6.4916	561.639	540.944	366.571	624.911		6.4916	536.639	515.944	341.571	599.911		6.4916	0.87901	0.896664	0.890207	0.924526	0.897602	0.0193747	0.00968734
6.53001	561.982	547.426	361.764	620.67		6.53001	536.982	522.426	336.764	595.67		6.53001	0.879572	0.907929	0.877679	0.917991	0.895793	0.0202588	0.0101294
6.55213	565.941	548.566	356.502	636.392		6.55213	540.941	523.566	331.502	611.392		6.55213	0.886057	0.909911	0.863965	0.94222	0.900538	0.0335286	0.0167643	0.0167643
6.59054	567.299	555.527	353.509	640.351		6.59054	542.299	530.527	328.509	615.351		6.59054	0.888281	0.922008	0.856165	0.948321	0.903694	0.0400981	0.020049
6.61634	564.386	552.904	363.656	622.678		6.61634	539.386	527.904	338.656	597.678		6.61634	0.88351	0.91745	0.88261	0.921085	0.901164	0.0209602	0.0104801
6.65476	564.212	550.214	364.258	644.859		6.65476	539.212	525.214	339.258	619.859		6.65476	0.883225	0.912775	0.884179	0.955268	0.908862	0.0338397	0.0169199
6.67687	563.508	542.398	363.465	634.447		6.67687	538.508	517.398	338.465	609.447		6.67687	0.882072	0.899191	0.882112	0.939222	0.900649	0.0269491	0.0134745	0.0134745
6.71528	561.758	543.55	374.319	627.958		6.71528	536.758	518.55	349.319	602.958		6.71528	0.879205	0.901193	0.9104	0.929222	0.905005	0.0207824	0.0103912
6.74109	570.424	552.481	363.915	633.667		6.74109	545.424	527.481	338.915	608.667		6.74109	0.8934	0.916714	0.883285	0.93802	0.907855	0.0245022	0.0122511
6.7795	567.008	548.655	367.512	639.125		6.7795	542.008	523.655	342.512	614.125		6.7795	0.887805	0.910065	0.892659	0.946432	0.90924	0.0265724	0.0132862
6.80161	569.539	551.478	369.313	631.192		6.80161	544.539	526.478	344.313	606.192		6.80161	0.891951	0.914971	0.897353	0.934206	0.90962	0.0191119	0.00955595	0.00955595
6.84002	562.724	549.184	363.718	632.374		6.84002	537.724	524.184	338.718	607.374		6.84002	0.880788	0.910985	0.882771	0.936028	0.902643	0.026183	0.0130915
6.86583	563.528	542.241	364.362	634.505		6.86583	538.528	517.241	339.362	609.505		6.86583	0.882105	0.898918	0.88445	0.939312	0.901196	0.0264759	0.0132379
6.90424	563.554	543.281	369.029	632.117		6.90424	538.554	518.281	344.029	607.117		6.90424	0.882147	0.900726	0.896613	0.935632	0.903779	0.0226804	0.0113402
6.92636	568.957	545.529	362.291	626.605		6.92636	543.957	520.529	337.291	601.605		6.92636	0.890997	0.904632	0.879052	0.927137	0.900455	0.0206309	0.0103155	0.0103155
6.96477	570.038	544.367	364.105	633.016		6.96477	545.038	519.367	339.105	608.016		6.96477	0.892768	0.902613	0.88378	0.937017	0.904045	0.0232884	0.0116442
6.99057	568.851	540.745	357.475	628.575		6.99057	543.851	515.745	332.475	603.575		6.99057	0.890824	0.896318	0.866501	0.930173	0.895954	0.0262354	0.0131177
7.02898	560.966	555.477	363.781	628.673		7.02898	535.966	530.477	338.781	603.673		7.02898	0.877908	0.921921	0.882936	0.930324	0.903272	0.0266865	0.0133432
7.0511	562.915	552.732	357.285	622.603		7.0511	537.915	527.732	332.285	597.603		7.0511	0.881101	0.917151	0.866006	0.92097	0.896307	0.0270315	0.0135157	0.0135157
7.08951	560.038	550.423	361.835	616.993		7.08951	535.038	525.423	336.835	591.993		7.08951	0.876388	0.913138	0.877864	0.912324	0.894928	0.020568	0.010284
7.11531	564.325	538.384	365.258	628.298		7.11531	539.325	513.384	340.258	603.298		7.11531	0.88341	0.892215	0.886785	0.929746	0.898039	0.021447	0.0107235
7.15372	564.186	544.901	364.819	627.526		7.15372	539.186	519.901	339.819	602.526		7.15372	0.883182	0.903541	0.885641	0.928556	0.90023	0.0209508	0.0104754
7.17584	569.055	551.893	363.055	628.099		7.17584	544.055	526.893	338.055	603.099		7.17584	0.891158	0.915693	0.881044	0.929439	0.904333	0.0221763	0.0110881	0.0110881
7.21425	557.386	548.827	368.506	620.631		7.21425	532.386	523.827	343.506	595.631		7.21425	0.872044	0.910364	0.89525	0.91793	0.898897	0.0202332	0.0101166
7.24005	568.73	544.406	359.687	624.376		7.24005	543.73	519.406	334.687	599.376		7.24005	0.890625	0.902681	0.872266	0.923702	0.897318	0.0215814	0.0107907
7.27846	555.99	547.64	373.358	621.874		7.27846	530.99	522.64	348.358	596.874		7.27846	0.869757	0.908301	0.907895	0.919846	0.90145	0.0218427	0.0109214
7.30058	568.146	548.574	370.762	633.526		7.30058	543.146	523.574	345.762	608.526		7.30058	0.889669	0.909924	0.90113	0.937803	0.909631	0.0205305	0.0102653	0.0102653
7.33899	570.855	547.64	365.16	627.421		7.33899	545.855	522.64	340.16	602.421		7.33899	0.894106	0.908301	0.88653	0.928395	0.904333	0.0184052	0.0092026
7.36664	570.558	546.57	368.524	631.549		7.36664	545.558	521.57	343.524	606.549		7.36664	0.89362	0.906442	0.895297	0.934756	0.907529	0.0190228	0.00951139
7.40505	568.316	541.197	365.487	638.001		7.40505	543.316	516.197	340.487	613.001		7.40505	0.889947	0.897104	0.887382	0.944699	0.904783	0.026927	0.0134635
7.42717	560.754	536.391	364.66	634.769		7.42717	535.754	511.391	339.66	609.769		7.42717	0.877561	0.888751	0.885226	0.939719	0.897814	0.0283241	0.014162	0.014162
7.46558	571.397	545.341	367.188	623.062		7.46558	546.397	520.341	342.188	598.062		7.46558	0.894994	0.904306	0.891815	0.921677	0.903198	0.0134111	0.00670556
7.49138	567.63	547.72	363.896	620.054		7.49138	542.63	522.72	338.896	595.054		7.49138	0.888824	0.90844	0.883235	0.917041	0.899385	0.0159801	0.00799006
7.52979	560.134	548.517	368.371	633.039		7.52979	535.134	523.517	343.371	608.039		7.52979	0.876545	0.909825	0.894898	0.937052	0.90458	0.0255712	0.0127856
7.55191	571.05	545.149	368.246	632.084		7.55191	546.05	520.149	343.246	607.084		7.55191	0.894426	0.903972	0.894572	0.935581	0.907138	0.0194809	0.00974044	0.00974044
7.59032	566.83	549.895	370.524	633.014		7.59032	541.83	524.895	345.524	608.014		7.59032	0.887513	0.91222	0.900509	0.937014	0.909314	0.0210438	0.0105219
7.61612	565.573	538.359	362.864	644.291		7.61612	540.573	513.359	337.864	619.291		7.61612	0.885454	0.892172	0.880546	0.954393	0.903141	0.0344986	0.0172493
7.65453	562.117	549.636	369.344	637.856		7.65453	537.117	524.636	344.344	612.856		7.65453	0.879793	0.91177	0.897434	0.944476	0.908368	0.0273948	0.0136974
7.67665	557.94	543.147	366.246	639.372		7.67665	532.94	518.147	341.246	614.372		7.67665	0.872952	0.900493	0.88936	0.946812	0.902404	0.0316931	0.0158465	0.0158465
7.71506	554.824	546.624	364.087	640.617		7.71506	529.824	521.624	339.087	615.617		7.71506	0.867848	0.906536	0.883733	0.948731	0.901712	0.0351383	0.0175691
7.74086	563.939	551.477	361.204	634.743		7.74086	538.939	526.477	336.204	609.743		7.74086	0.882778	0.91497	0.876219	0.939679	0.903411	0.0295186	0.0147593
7.77927	559.412	547.931	372.728	644.766		7.77927	534.412	522.931	347.728	619.766		7.77927	0.875363	0.908807	0.906253	0.955125	0.911387	0.0328825	0.0164413
7.80139	565.751	547.284	371.779	622.849		7.80139	540.751	522.284	346.779	597.849		7.80139	0.885746	0.907683	0.90378	0.921349	0.904639	0.0146761	0.00733805	0.00733805
7.8398	567.151	545.877	366.394	629.164		7.8398	542.151	520.877	341.394	604.164		7.8398	0.888039	0.905237	0.889746	0.931081	0.903526	0.0199327	0.00996633
7.8656	569.013	546.87	365.61	632.021		7.8656	544.013	521.87	340.61	607.021		7.8656	0.891089	0.906963	0.887702	0.935484	0.90531	0.0217979	0.010899
7.90401	562.311	547.384	365.751	629.062		7.90401	537.311	522.384	340.751	604.062		7.90401	0.880111	0.907856	0.88807	0.930924	0.90174	0.0226845	0.0113423
7.92613	564.188	558.902	367.154	635.785		7.92613	539.188	533.902	342.154	610.785		7.92613	0.883186	0.927874	0.891726	0.941284	0.911018	0.02797	0.013985	0.013985
7.96454	564.995	556.423	370.916	629.546		7.96454	539.995	531.423	345.916	604.546		7.96454	0.884508	0.923565	0.901531	0.931669	0.910318	0.0214069	0.0107034
7.99035	565.752	547.208	360.127	632.861		7.99035	540.752	522.208	335.127	607.861		7.99035	0.885747	0.90755	0.873413	0.936778	0.900872	0.0277887	0.0138943
8.02876	569.657	548.006	365.646	633.158		8.02876	544.657	523.006	340.646	608.158		8.02876	0.892144	0.908937	0.887796	0.937236	0.906528	0.0224095	0.0112048
8.05087	566.412	545.29	357.81	625.643		8.05087	541.412	520.29	332.81	600.643		8.05087	0.886829	0.904217	0.867374	0.925654	0.896019	0.024836	0.012418	0.012418
8.08928	564.41	542.601	372.587	619.678		8.08928	539.41	517.601	347.587	594.678		8.08928	0.883549	0.899544	0.905886	0.916462	0.90136	0.0137728	0.00688638
8.11509	561.075	548.139	373.708	621.86		8.11509	536.075	523.139	348.708	596.86		8.11509	0.878087	0.909168	0.908808	0.919824	0.903972	0.0179976	0.00899879
8.1535	567.902	544.404	364.35	624.7		8.1535	542.902	519.404	339.35	599.7		8.1535	0.889269	0.902677	0.884419	0.924201	0.900142	0.0178019	0.00890093
8.17561	561.717	554.272	372.451	625.06		8.17561	536.717	529.272	347.451	600.06		8.17561	0.879138	0.919827	0.905532	0.924756	0.907313	0.0204764	0.0102382	0.0102382
8.21403	566.516	541.987	367.135	624.986		8.21403	541.516	516.987	342.135	599.986		8.21403	0.886999	0.898477	0.891677	0.924642	0.900449	0.0168032	0.00840161
8.24167	576.717	556.357	372.603	623.887		8.24167	551.717	531.357	347.603	598.887		8.24167	0.903708	0.923451	0.905928	0.922948	0.914009	0.0106532	0.0053266
8.28008	571.956	544.044	367.765	635.329		8.28008	546.956	519.044	342.765	610.329		8.28008	0.89591	0.902052	0.893319	0.940582	0.907965	0.0220504	0.0110252
8.3022	571.133	546.67	368.109	636.106		8.3022	546.133	521.67	343.109	611.106		8.3022	0.894562	0.906615	0.894215	0.941779	0.909293	0.0224118	0.0112059	0.0112059
8.34061	564.134	552.293	363.941	624.088		8.34061	539.134	527.293	338.941	599.088		8.34061	0.883097	0.916388	0.883353	0.923258	0.901524	0.0213154	0.0106577
8.36641	572.081	548.971	369.597	619.717		8.36641	547.081	523.971	344.597	594.717		8.36641	0.896114	0.910614	0.898093	0.916522	0.905336	0.00984005	0.00492002
8.40482	569.364	548.667	366.549	628.539		8.40482	544.364	523.667	341.549	603.539		8.40482	0.891664	0.910086	0.89015	0.930118	0.905504	0.018745	0.0093725
8.42694	566.915	548.521	360.537	625.311		8.42694	541.915	523.521	335.537	600.311		8.42694	0.887652	0.909832	0.874481	0.925143	0.899277	0.0225863	0.0112932	0.0112932
8.46535	561.033	559.487	369.153	625.041		8.46535	536.033	534.487	344.153	600.041		8.46535	0.878018	0.92889	0.896936	0.924727	0.907143	0.0240457	0.0120228
8.49116	568.525	549.7	367.787	644.096		8.49116	543.525	524.7	342.787	619.096		8.49116	0.89029	0.911881	0.893376	0.954093	0.91241	0.0293786	0.0146893
8.52957	560.647	552.519	373.059	639.104		8.52957	535.647	527.519	348.059	614.104		8.52957	0.877386	0.91678	0.907116	0.946399	0.91192	0.0284497	0.0142248
8.55168	565.007	557.982	368.142	635.73		8.55168	540.007	532.982	343.142	610.73		8.55168	0.884527	0.926275	0.894301	0.9412	0.911576	0.0266062	0.0133031	0.0133031
8.59009	568.664	546.729	374.294	631.714		8.59009	543.664	521.729	349.294	606.714		8.59009	0.890517	0.906718	0.910335	0.935011	0.910645	0.0183877	0.00919384
8.6159	556.191	549.938	368.772	642.171		8.6159	531.191	524.938	343.772	617.171		8.6159	0.870087	0.912295	0.895943	0.951126	0.907363	0.0339581	0.016979
8.65431	571.424	535.753	367.267	626.132		8.65431	546.424	510.753	342.267	601.132		8.65431	0.895038	0.887643	0.892021	0.926408	0.900277	0.017683	0.00884151
8.67642	557.05	541.9	369.889	634.397		8.67642	532.05	516.9	344.889	609.397		8.67642	0.871494	0.898326	0.898854	0.939145	0.901955	0.0278914	0.0139457	0.0139457
8.71484	566.359	538.243	362.197	638.306		8.71484	541.359	513.243	337.197	613.306		8.71484	0.886742	0.89197	0.878807	0.94517	0.900672	0.0301544	0.0150772
8.74064	563.11	538.465	367.976	631.153		8.74064	538.11	513.465	342.976	606.153		8.74064	0.88142	0.892356	0.893869	0.934146	0.900448	0.0231401	0.01157
8.77905	559.867	552.955	374.104	632.01		8.77905	534.867	527.955	349.104	607.01		8.77905	0.876108	0.917538	0.90984	0.935467	0.909738	0.0248583	0.0124291
8.80117	552.467	543.461	365.153	627.181		8.80117	527.467	518.461	340.153	602.181		8.80117	0.863987	0.901038	0.886511	0.928025	0.89489	0.0268385	0.0134193	0.0134193
8.83958	558.44	547.33	360.331	633.354		8.83958	533.44	522.33	335.331	608.354		8.83958	0.87377	0.907762	0.873944	0.937538	0.898254	0.0306814	0.0153407
8.86538	563.205	552.34	368.157	614.145		8.86538	538.205	527.34	343.157	589.145		8.86538	0.881576	0.916469	0.89434	0.907935	0.90008	0.015337	0.00766849
8.90379	550.516	558.999	367.217	630.098		8.90379	525.516	533.999	342.217	605.098		8.90379	0.860791	0.928042	0.891891	0.93252	0.903311	0.0336807	0.0168404
8.92591	553.719	544.203	373.808	627.312		8.92591	528.719	519.203	348.808	602.312		8.92591	0.866038	0.902328	0.909068	0.928227	0.901415	0.0260117	0.0130059	0.0130059
8.96432	561.256	540.252	364.176	630.23		8.96432	536.256	515.252	339.176	605.23		8.96432	0.878383	0.895462	0.883965	0.932724	0.897633	0.0244502	0.0122251
8.99012	564.916	539.978	374.321	622.525		8.99012	539.916	514.978	349.321	597.525		8.99012	0.884378	0.894985	0.910405	0.920849	0.902654	0.0161654	0.00808272
9.02853	566.327	552.363	364.871	626.694		9.02853	541.327	527.363	339.871	601.694		9.02853	0.886689	0.916509	0.885776	0.927274	0.904062	0.0210548	0.0105274
9.05065	567.372	547.55	366.811	624.363		9.05065	542.372	522.55	341.811	599.363		9.05065	0.888401	0.908145	0.890832	0.923682	0.902765	0.016484	0.008242	0.008242
9.08906	562.523	541.414	366.798	624.307		9.08906	537.523	516.414	341.798	599.307		9.08906	0.880458	0.897481	0.890799	0.923596	0.898083	0.0183933	0.00919666
9.11671	569.144	543.214	369.46	631.418		9.11671	544.144	518.214	344.46	606.418		9.11671	0.891304	0.900609	0.897736	0.934554	0.906051	0.0193965	0.00969826
9.15512	568.469	545.476	364.346	621.534		9.15512	543.469	520.476	339.346	596.534		9.15512	0.890198	0.90454	0.884408	0.919322	0.899617	0.0156265	0.00781323
9.17723	569.443	551.666	358.327	631.341		9.17723	544.443	526.666	333.327	606.341		9.17723	0.891793	0.915298	0.868721	0.934436	0.902562	0.0285149	0.0142574	0.0142574
9.21565	565.118	538.464	368.993	615.001		9.21565	540.118	513.464	343.993	590.001		9.21565	0.884709	0.892354	0.896519	0.909254	0.895709	0.0102694	0.00513468
9.24145	565.416	546.975	363.741	628.605		9.24145	540.416	521.975	338.741	603.605		9.24145	0.885197	0.907146	0.882831	0.930219	0.901348	0.0221425	0.0110713
9.27986	567.066	546.464	366.801	642.901		9.27986	542.066	521.464	341.801	617.901		9.27986	0.8879	0.906257	0.890806	0.952251	0.909304	0.0297434	0.0148717
9.30198	563.104	557.288	369.908	635.329		9.30198	538.104	532.288	344.908	610.329		9.30198	0.88141	0.925069	0.898904	0.940582	0.911491	0.0264191	0.0132096	0.0132096
9.34039	563.224	555.318	371.943	626.632		9.34039	538.224	530.318	346.943	601.632		9.34039	0.881607	0.921645	0.904208	0.927179	0.908659	0.0205204	0.0102602
9.36619	575.397	556.055	366.393	632.082		9.36619	550.397	531.055	341.393	607.082		9.36619	0.901546	0.922926	0.889743	0.935578	0.912448	0.0206489	0.0103245
9.4046	570.869	551.494	364.613	627.591		9.4046	545.869	526.494	339.613	602.591		9.4046	0.894129	0.914999	0.885104	0.928657	0.905722	0.0197615	0.00988077
9.42672	565.518	537.416	371.805	640.126		9.42672	540.518	512.416	346.805	615.126		9.42672	0.885364	0.890533	0.903848	0.947974	0.90693	0.0284493	0.0142246	0.0142246
9.46513	568.725	547.38	363.117	635.876		9.46513	543.725	522.38	338.117	610.876		9.46513	0.890617	0.907849	0.881205	0.941425	0.905274	0.0265055	0.0132528
9.49093	569.594	555.208	364.197	627.879		9.49093	544.594	530.208	339.197	602.879		9.49093	0.892041	0.921454	0.88402	0.9291	0.906654	0.0219752	0.0109876
9.52934	566.458	542.019	366.602	621.861		9.52934	541.458	517.019	341.602	596.861		9.52934	0.886904	0.898532	0.890288	0.919826	0.898888	0.0147886	0.00739431
9.55146	572.719	552.909	371.434	625.145		9.55146	547.719	527.909	346.434	600.145		9.55146	0.897159	0.917458	0.902881	0.924887	0.910596	0.0127983	0.00639914	0.00639914
9.58987	572.931	544.278	368.499	634.606		9.58987	547.931	519.278	343.499	609.606		9.58987	0.897507	0.902458	0.895232	0.939467	0.908666	0.0207547	0.0103773
9.61567	561.721	550.467	371.608	628.333		9.61567	536.721	525.467	346.608	603.333		9.61567	0.879145	0.913214	0.903334	0.9298	0.906373	0.0211836	0.0105918
9.65408	570.069	550.675	362.687	631.544		9.65408	545.069	525.675	337.687	606.544		9.65408	0.892819	0.913576	0.880084	0.934749	0.905307	0.0239952	0.0119976
9.6762	563.153	538.616	362.984	638.375		9.6762	538.153	513.616	337.984	613.375		9.6762	0.88149	0.892618	0.880858	0.945276	0.900061	0.0306234	0.0153117	0.0153117
9.71461	563.051	552.372	369.823	644.231		9.71461	538.051	527.372	344.823	619.231		9.71461	0.881323	0.916525	0.898682	0.954301	0.912708	0.0312315	0.0156158
9.74041	577.37	554.588	362.567	637.948		9.74041	552.37	529.588	337.567	612.948		9.74041	0.904778	0.920376	0.879772	0.944618	0.912386	0.0272293	0.0136147
9.77883	558.72	549.136	369.045	630.649		9.77883	533.72	524.136	344.045	605.649		9.77883	0.874229	0.910901	0.896655	0.933369	0.903789	0.0248345	0.0124172
9.80094	563.114	556.755	360.956	639.054		9.80094	538.114	531.755	335.956	614.054		9.80094	0.881426	0.924142	0.875573	0.946322	0.906866	0.034067	0.0170335	0.0170335
9.83935	570.776	547.399	367.874	639.164		9.83935	545.776	522.399	342.874	614.164		9.83935	0.893977	0.907882	0.893603	0.946492	0.910488	0.0249051	0.0124525
9.86516	570.066	543.73	370.62	627.222		9.86516	545.066	518.73	345.62	602.222		9.86516	0.892814	0.901506	0.90076	0.928088	0.905792	0.0153757	0.00768785
9.90357	562.64	548.436	364.044	635.627		9.90357	537.64	523.436	339.044	610.627		9.90357	0.88065	0.909685	0.883621	0.941041	0.903749	0.028075	0.0140375
9.92568	572.473	554.806	366.519	635.637		9.92568	547.473	529.806	341.519	610.637		9.92568	0.896756	0.920755	0.890071	0.941056	0.91216	0.0233384	0.0116692	0.0116692
9.96409	575.926	556.873	358.193	641.043		9.96409	550.926	531.873	333.193	616.043		9.96409	0.902412	0.924347	0.868372	0.949388	0.91113	0.0343636	0.0171818
9.99174	570.165	558.506	366.15	631.315		9.99174	545.165	533.506	341.15	606.315		9.99174	0.892976	0.927185	0.88911	0.934396	0.910917	0.0231901	0.011595
10.0302	568.328	555.354	365.426	632.675		10.0302	543.328	530.354	340.426	607.675		10.0302	0.889967	0.921707	0.887223	0.936492	0.908847	0.0241776	0.0120888
10.0523	559.063	562.231	367.608	629.055		10.0523	534.063	537.231	342.608	604.055		10.0523	0.874791	0.933659	0.89291	0.930913	0.908068	0.0289478	0.0144739	0.0144739
10.0907	575.158	553.676	364.181	631.33		10.0907	550.158	528.676	339.181	606.33		10.0907	0.901154	0.918791	0.883978	0.934419	0.909586	0.0218194	0.0109097
10.1165	569.024	565.411	368.272	629.906		10.1165	544.024	540.411	343.272	604.906		10.1165	0.891107	0.939186	0.89464	0.932224	0.914289	0.0249332	0.0124666
10.1549	573.021	564.811	373.086	633.968		10.1549	548.021	539.811	348.086	608.968		10.1549	0.897654	0.938143	0.907186	0.938484	0.920367	0.0210857	0.0105428
10.177	568.682	565.161	374.487	638.074		10.177	543.682	540.161	349.487	613.074		10.177	0.890547	0.938751	0.910838	0.944812	0.921237	0.0252491	0.0126246	0.0126246
10.2154	570.2	560.296	369.95	625.102		10.2154	545.2	535.296	344.95	600.102		10.2154	0.893033	0.930296	0.899013	0.924821	0.911791	0.0185053	0.00925264
10.2412	562.596	559.516	374.143	630.093		10.2412	537.596	534.516	349.143	605.093		10.2412	0.880578	0.928941	0.909941	0.932512	0.912993	0.0237724	0.0118862
10.2796	560.011	561.058	373.08	639.465		10.2796	535.011	536.058	348.08	614.465		10.2796	0.876344	0.93162	0.907171	0.946956	0.915523	0.0308324	0.0154162
10.3018	566.619	550.856	371.185	620.315		10.3018	541.619	525.856	346.185	595.315		10.3018	0.887168	0.91389	0.902232	0.917443	0.905183	0.0136553	0.00682763	0.00682763
10.3402	566.34	558.27	374.06	621.501		10.3402	541.34	533.27	349.06	596.501		10.3402	0.886711	0.926775	0.909725	0.919271	0.91062	0.0174001	0.00870006
10.366	571.312	560.8	373.38	625.275		10.366	546.312	535.8	348.38	600.275		10.366	0.894855	0.931172	0.907953	0.925087	0.914767	0.0165184	0.00825919
10.4044	569.901	558.099	370.536	626.342		10.4044	544.901	533.099	345.536	601.342		10.4044	0.892544	0.926478	0.900541	0.926732	0.911573	0.0176615	0.00883073
10.4265	568.43	548.266	368.873	629.806		10.4265	543.43	523.266	343.873	604.806		10.4265	0.890134	0.909389	0.896206	0.93207	0.90695	0.0185757	0.00928784	0.00928784
10.4649	563.445	559.202	373.234	646.42		10.4649	538.445	534.202	348.234	621.42		10.4649	0.881969	0.928395	0.907572	0.957674	0.918902	0.0320719	0.016036
10.4907	575.303	560.846	368.673	640.512		10.4907	550.303	535.846	343.673	615.512		10.4907	0.901392	0.931252	0.895685	0.948569	0.919225	0.0250191	0.0125096
10.5291	568.069	563.53	368.397	636.465		10.5291	543.069	538.53	343.397	611.465		10.5291	0.889543	0.935917	0.894966	0.942332	0.915689	0.027277	0.0136385
10.5512	567.237	555.348	367.241	636.582		10.5512	542.237	530.348	342.241	611.582		10.5512	0.88818	0.921697	0.891953	0.942513	0.911086	0.0257616	0.0128808	0.0128808
10.5896	567.252	556.766	363.609	639.707		10.5896	542.252	531.766	338.609	614.707		10.5896	0.888204	0.924161	0.882487	0.947329	0.910545	0.0306853	0.0153427
10.6154	568.166	553.275	375.393	627.59		10.6154	543.166	528.275	350.393	602.59		10.6154	0.889702	0.918094	0.913199	0.928655	0.912412	0.0164571	0.00822854
10.6539	574.411	554.854	364.875	637.595		10.6539	549.411	529.854	339.875	612.595		10.6539	0.899931	0.920839	0.885787	0.944074	0.912657	0.0254159	0.012708
10.676	573.734	547.921	363.39	633.306		10.676	548.734	522.921	338.39	608.306		10.676	0.898822	0.90879	0.881917	0.937464	0.906748	0.0232885	0.0116442	0.0116442
10.6985	576.223	558.977	367.961	639.126		10.6985	551.223	533.977	342.961	614.126		10.6985	0.902899	0.928004	0.89383	0.946433	0.917791	0.0239486	0.0119743
10.7369	573.057	553.292	366.347	626.62		10.7369	548.057	528.292	341.347	601.62		10.7369	0.897713	0.918124	0.889623	0.92716	0.908155	0.0174455	0.00872275
10.759	573.008	558.242	365.952	627.549		10.759	548.008	533.242	340.952	602.549		10.759	0.897633	0.926727	0.888594	0.928592	0.910386	0.0202979	0.0101489
10.7974	576.98	563.855	370.683	635.961		10.7974	551.98	538.855	345.683	610.961		10.7974	0.904139	0.936481	0.900924	0.941556	0.920775	0.0212082	0.0106041	0.0106041
10.8196	561.103	554.745	369.819	638.944		10.8196	536.103	529.745	344.819	613.944		10.8196	0.878132	0.920649	0.898672	0.946153	0.910902	0.0292178	0.0146089
10.858	564.366	552.225	365.614	642.422		10.858	539.366	527.225	340.614	617.422		10.858	0.883477	0.91627	0.887713	0.951513	0.909743	0.0314246	0.0157123
10.8801	568.004	547.143	363.717	638.666		10.8801	543.004	522.143	338.717	613.666		10.8801	0.889436	0.907437	0.882769	0.945724	0.906342	0.0282469	0.0141235
10.9185	571.817	552.719	370.596	641.868		10.9185	546.817	527.719	345.596	616.868		10.9185	0.895682	0.917128	0.900697	0.950659	0.916041	0.0248295	0.0124148	0.0124148
10.9406	567.784	557.46	373.196	633.557		10.9406	542.784	532.46	348.196	608.557		10.9406	0.889076	0.925367	0.907473	0.937851	0.914942	0.0212786	0.0106393
10.979	566.79	552.141	372.436	627.365		10.979	541.79	527.141	347.436	602.365		10.979	0.887448	0.916124	0.905492	0.928308	0.909343	0.0173194	0.00865971
11.0011	565.304	557.232	368.931	641.826		11.0011	540.304	532.232	343.931	616.826		11.0011	0.885014	0.924971	0.896358	0.950594	0.914234	0.0295	0.01475
11.0395	571.418	556.186	372.487	634.974		11.0395	546.418	531.186	347.487	609.974		11.0395	0.895028	0.923153	0.905625	0.940035	0.91596	0.0198012	0.00990062	0.00990062
11.0654	568.041	554.051	367.884	642.453		11.0654	543.041	529.051	342.884	617.453		11.0654	0.889497	0.919443	0.893629	0.95156	0.913532	0.0286061	0.014303
11.1038	563.399	551.019	361.144	629.21		11.1038	538.399	526.019	336.144	604.21		11.1038	0.881893	0.914174	0.876063	0.931152	0.90082	0.0262644	0.0131322
11.1259	568.734	561.539	359.878	644.892		11.1259	543.734	536.539	334.878	619.892		11.1259	0.890632	0.932456	0.872764	0.955319	0.912793	0.0378091	0.0189046
11.1643	569.187	554.968	373.064	640.148		11.1643	544.187	529.968	348.064	615.148		11.1643	0.891374	0.921037	0.907129	0.948008	0.916887	0.0240269	0.0120135	0.0120135
11.1901	562.829	552.307	376.947	636.241		11.1901	537.829	527.307	351.947	611.241		11.1901	0.88096	0.916412	0.917249	0.941987	0.914152	0.0251079	0.012554
11.2285	572.407	555.043	369.8	636.444		11.2285	547.407	530.043	344.8	611.444		11.2285	0.896648	0.921167	0.898622	0.9423	0.914684	0.0215091	0.0107546
11.2506	563.464	550.806	364.544	633.283		11.2506	538.464	525.806	339.544	608.283		11.2506	0.882	0.913803	0.884924	0.937429	0.904539	0.0262063	0.0131031
11.289	572.027	553.736	371.728	630.023		11.289	547.027	528.736	346.728	605.023		11.289	0.896026	0.918896	0.903647	0.932405	0.912743	0.0161928	0.00809642	0.00809642
11.3167	577.503	551.658	368.94	643.862		11.3167	552.503	526.658	343.94	618.862		11.3167	0.904996	0.915284	0.896381	0.953732	0.917598	0.0252982	0.0126491
11.3551	576.05	555.196	374.859	638.158		11.3551	551.05	530.196	349.859	613.158		11.3551	0.902616	0.921433	0.911807	0.944941	0.920199	0.0181962	0.00909812
11.3772	570.741	560.499	366.148	638.706		11.3772	545.741	535.499	341.148	613.706		11.3772	0.893919	0.930649	0.889105	0.945786	0.914865	0.0277342	0.0138671
11.4156	581.9	554.589	370.603	639.214		11.4156	556.9	529.589	345.603	614.214		11.4156	0.912198	0.920378	0.900715	0.946569	0.919965	0.0194835	0.00974174	0.00974174
11.4414	576.183	547.551	369.959	641.651		11.4414	551.183	522.551	344.959	616.651		11.4414	0.902833	0.908147	0.899037	0.950325	0.915085	0.023788	0.011894
11.4798	568.267	560.92	372.444	633.499		11.4798	543.267	535.92	347.444	608.499		11.4798	0.889867	0.931381	0.905513	0.937761	0.916131	0.0223827	0.0111914
11.5019	566.438	559.379	364.088	637.936		11.5019	541.438	534.379	339.088	612.936		11.5019	0.886871	0.928703	0.883736	0.944599	0.910977	0.0303745	0.0151873
11.5404	572.413	557.751	369.608	639.615		11.5404	547.413	532.751	344.608	614.615		11.5404	0.896658	0.925873	0.898122	0.947187	0.91696	0.0242222	0.0121111	0.0121111
11.5662	572.732	541.231	370.516	642.194		11.5662	547.732	516.231	345.516	617.194		11.5662	0.897181	0.897163	0.900488	0.951161	0.911498	0.0264882	0.0132441
11.6046	569.061	554.209	371.048	631.47		11.6046	544.061	529.209	346.048	606.47		11.6046	0.891168	0.919718	0.901875	0.934635	0.911849	0.0192206	0.0096103
11.6267	570.459	550.579	368.856	631.72		11.6267	545.459	525.579	343.856	606.72		11.6267	0.893458	0.913409	0.896162	0.93502	0.909512	0.0191642	0.00958209
11.6651	568.791	550.896	368.445	638.922		11.6651	543.791	525.896	343.445	613.922		11.6651	0.890725	0.91396	0.895091	0.946119	0.911474	0.0252015	0.0126008	0.0126008
11.6909	567.198	549.275	370.826	641.328		11.6909	542.198	524.275	345.826	616.328		11.6909	0.888116	0.911143	0.901296	0.949827	0.912595	0.026553	0.0132765
11.7293	570.609	541.642	371.003	640.783		11.7293	545.609	516.642	346.003	615.783		11.7293	0.893703	0.897877	0.901758	0.948987	0.910581	0.0258141	0.012907
11.7514	565.051	548.023	371.383	635.322		11.7514	540.051	523.023	346.383	610.322		11.7514	0.884599	0.908967	0.902748	0.940571	0.909221	0.0233167	0.0116584
11.7898	572.628	550.407	374.118	643.989		11.7898	547.628	525.407	349.118	618.989		11.7898	0.89701	0.91311	0.909876	0.953928	0.918481	0.0246329	0.0123165	0.0123165
11.8156	558.388	548.708	369.967	639.58		11.8156	533.388	523.708	344.967	614.58		11.8156	0.873685	0.910157	0.899058	0.947133	0.907508	0.0305097	0.0152549
11.8541	569.458	552.822	372.4	634.065		11.8541	544.458	527.822	347.4	609.065		11.8541	0.891818	0.917307	0.905399	0.938634	0.913289	0.0198475	0.00992373
11.8762	570.02	554.196	375.272	630.306		11.8762	545.02	529.196	350.272	605.306		11.8762	0.892738	0.919695	0.912884	0.932841	0.914539	0.0167286	0.0083643
11.9146	568.377	549.919	368.463	642.221		11.9146	543.377	524.919	343.463	617.221		11.9146	0.890047	0.912262	0.895138	0.951203	0.912163	0.0277073	0.0138537	0.0138537
11.9404	566.391	554.524	372.248	634.734		11.9404	541.391	529.524	347.248	609.734		11.9404	0.886794	0.920265	0.905002	0.939665	0.912932	0.0224683	0.0112341
11.9788	568.039	552.726	374.332	636.511		11.9788	543.039	527.726	349.332	611.511		11.9788	0.889494	0.91714	0.910434	0.942403	0.914868	0.0218088	0.0109044
12.0009	570.213	550.865	367.072	628.19		12.0009	545.213	525.865	342.072	603.19		12.0009	0.893055	0.913906	0.891513	0.92958	0.907013	0.018183	0.0090915
12.0393	570.933	552.885	370.112	635.264		12.0393	545.933	527.885	345.112	610.264		12.0393	0.894234	0.917417	0.899436	0.940481	0.912892	0.0209033	0.0104517	0.0104517
12.0651	573.841	548.827	363.17	636.774		12.0651	548.841	523.827	338.17	611.774		12.0651	0.898997	0.910364	0.881343	0.942809	0.908378	0.0258733	0.0129367
12.1035	571.307	549.722	366.721	639.627		12.1035	546.307	524.722	341.721	614.627		12.1035	0.894847	0.91192	0.890598	0.947205	0.911142	0.0257473	0.0128736
12.1257	573.141	553.822	365.887	637.01		12.1257	548.141	528.822	340.887	612.01		12.1257	0.897851	0.919045	0.888424	0.943172	0.912123	0.0243399	0.01217
12.1641	573.103	546.225	371.03	648.055		12.1641	548.103	521.225	346.03	623.055		12.1641	0.897788	0.905842	0.901828	0.960194	0.916413	0.0293717	0.0146859	0.0146859
12.1917	575.168	548.64	365.671	632.984		12.1917	550.168	523.64	340.671	607.984		12.1917	0.901171	0.910039	0.887861	0.936968	0.90901	0.0207478	0.0103739
12.2301	568.491	544.025	369.693	640.16		12.2301	543.491	519.025	344.693	615.16		12.2301	0.890234	0.902019	0.898344	0.948027	0.909656	0.0260501	0.0130251
12.2522	573.972	547.269	368.733	638.071		12.2522	548.972	522.269	343.733	613.071		12.2522	0.899212	0.907656	0.895842	0.944807	0.911879	0.0225075	0.0112537
12.2907	574.031	556.12	358.205	647.161		12.2907	549.031	531.12	333.205	622.161		12.2907	0.899308	0.923039	0.868403	0.958816	0.912392	0.0381869	0.0190934	0.0190934
12.3165	569.711	549.793	365.743	647.224		12.3165	544.711	524.793	340.743	622.224		12.3165	0.892232	0.912043	0.888049	0.958913	0.912809	0.0324686	0.0162343
12.3549	565.14	552.235	370.332	629.643		12.3549	540.14	527.235	345.332	604.643		12.3549	0.884745	0.916287	0.900009	0.931819	0.908215	0.0203345	0.0101673
12.377	571.201	554.199	364.465	635.437		12.377	546.201	529.199	339.465	610.437		12.377	0.894673	0.9197	0.884718	0.940748	0.90996	0.0252561	0.0126281
12.4154	574.431	547.194	364.688	633.874		12.4154	549.431	522.194	339.688	608.874		12.4154	0.899964	0.907526	0.885299	0.938339	0.907782	0.0223637	0.0111819	0.0111819
12.4412	571.121	546.616	368.558	636.212		12.4412	546.121	521.616	343.558	611.212		12.4412	0.894542	0.906522	0.895386	0.941942	0.909598	0.0222434	0.0111217
12.4796	574.007	554.574	369.455	642.21		12.4796	549.007	529.574	344.455	617.21		12.4796	0.899269	0.920352	0.897723	0.951186	0.917133	0.0249387	0.0124694
12.5017	569.192	538.098	369.006	642.746		12.5017	544.192	513.098	344.006	617.746		12.5017	0.891382	0.891718	0.896553	0.952012	0.907916	0.0294919	0.0147459
12.5401	577.759	554.445	360.578	645.241		12.5401	552.759	529.445	335.578	620.241		12.5401	0.905415	0.920128	0.874588	0.955857	0.913997	0.033747	0.0168735	0.0168735
12.5659	571.272	549.291	379.206	643.284		12.5659	546.272	524.291	354.206	618.284		12.5659	0.894789	0.911171	0.923136	0.952841	0.920484	0.0245016	0.0122508
12.6043	570.586	552.024	372.068	640.728		12.6043	545.586	527.024	347.068	615.728		12.6043	0.893666	0.91592	0.904533	0.948902	0.915755	0.023893	0.0119465
12.6265	571.549	553.407	374.414	638.947		12.6265	546.549	528.407	349.414	613.947		12.6265	0.895243	0.918324	0.910648	0.946157	0.917593	0.0213246	0.0106623
12.6649	572.85	563.3	370.693	632.506		12.6649	547.85	538.3	345.693	607.506		12.6649	0.897374	0.935517	0.90095	0.936231	0.917518	0.021248	0.010624	0.010624
12.6907	575.822	552.927	373.359	636.624		12.6907	550.822	527.927	348.359	611.624		12.6907	0.902242	0.91749	0.907898	0.942577	0.917552	0.0178313	0.00891566
12.7291	561.19	555.705	368.639	639.623		12.7291	536.19	530.705	343.639	614.623		12.7291	0.878275	0.922317	0.895597	0.947199	0.910847	0.0302576	0.0151288
12.7512	572.197	549.985	368.873	651.092		12.7512	547.197	524.985	343.873	626.092		12.7512	0.896304	0.912377	0.896206	0.964874	0.91744	0.0325229	0.0162614
12.7896	569.358	552.325	369.999	639.712		12.7896	544.358	527.325	344.999	614.712		12.7896	0.891654	0.916443	0.899141	0.947336	0.913644	0.0247447	0.0123723	0.0123723
12.8154	568.795	550.849	366.182	629.501		12.8154	543.795	525.849	341.182	604.501		12.8154	0.890732	0.913878	0.889193	0.9316	0.906351	0.0202692	0.0101346
12.8538	565.412	555.248	372.517	645.932		12.8538	540.412	530.248	347.517	620.932		12.8538	0.885191	0.921523	0.905704	0.956922	0.917335	0.0302943	0.0151471
12.8759	563.829	558.363	373.588	646.343		12.8759	538.829	533.363	348.588	621.343		12.8759	0.882598	0.926937	0.908495	0.957555	0.918896	0.0315434	0.0157717
12.9144	557.573	548.103	372.456	652.04		12.9144	532.573	523.103	347.456	627.04		12.9144	0.87235	0.909106	0.905545	0.966335	0.913334	0.0390185	0.0195092	0.0195092
12.9402	568.895	560.508	376.666	638.17		12.9402	543.895	535.508	351.666	613.17		12.9402	0.890896	0.930665	0.916517	0.94496	0.920759	0.0230479	0.011524
12.9786	562.741	560.179	378.442	638.376		12.9786	537.741	535.179	353.442	613.376		12.9786	0.880816	0.930093	0.921145	0.945277	0.919333	0.0275425	0.0137712
13.0007	555.989	558.849	378.106	645.644		13.0007	530.989	533.849	353.106	620.644		13.0007	0.869756	0.927781	0.92027	0.956478	0.918571	0.0360906	0.0180453
13.0391	565.719	554.045	365.245	630.026		13.0391	540.719	529.045	340.245	605.026		13.0391	0.885693	0.919433	0.886751	0.932409	0.906072	0.0235282	0.0117641	0.0117641
13.0667	566.498	560.863	373.177	658.552		13.0667	541.498	535.863	348.177	633.552		13.0667	0.886969	0.931282	0.907424	0.976371	0.925511	0.0384388	0.0192194
13.1052	561.932	562.777	371.454	635.271		13.1052	536.932	537.777	346.454	610.271		13.1052	0.87949	0.934608	0.902933	0.940492	0.914381	0.0285151	0.0142576
13.1273	571.164	551.488	361.429	647.691		13.1273	546.164	526.488	336.429	622.691		13.1273	0.894612	0.914989	0.876806	0.959633	0.91151	0.0356736	0.0178368
13.1657	571.442	560.992	373.605	637.04		13.1657	546.442	535.992	348.605	612.04		13.1657	0.895068	0.931506	0.908539	0.943218	0.919583	0.021785	0.0108925	0.0108925
13.1915	567.867	562.353	369.686	636.781		13.1915	542.867	537.353	344.686	611.781		13.1915	0.889212	0.933871	0.898325	0.942819	0.916057	0.0262592	0.0131296
13.2299	573.396	556.464	375.634	630.97		13.2299	548.396	531.464	350.634	605.97		13.2299	0.898268	0.923637	0.913827	0.933864	0.917399	0.0151519	0.00757597
13.252	570.37	554.592	373.183	630.007		13.252	545.37	529.592	348.183	605.007		13.252	0.893312	0.920383	0.907439	0.93238	0.913379	0.0168134	0.00840668
13.2904	569.54	547.655	373.431	637.942		13.2904	544.54	522.655	348.431	612.942		13.2904	0.891952	0.908327	0.908086	0.944609	0.913243	0.02227	0.011135	0.011135
13.3162	566.63	549.629	373.994	639.021		13.3162	541.63	524.629	348.994	614.021		13.3162	0.887186	0.911758	0.909553	0.946271	0.913692	0.0243918	0.0121959
13.3546	567.752	543.52	371.06	648.045		13.3546	542.752	518.52	346.06	623.045		13.3546	0.889023	0.901141	0.901906	0.960178	0.913062	0.0319602	0.0159801
13.3768	557.141	549.081	366.33	644.206		13.3768	532.141	524.081	341.33	619.206		13.3768	0.871643	0.910806	0.889579	0.954262	0.906572	0.0355953	0.0177977
13.4152	563.893	544.467	370.216	631.919		13.4152	538.893	519.467	345.216	606.919		13.4152	0.882702	0.902787	0.899707	0.935326	0.905131	0.0219827	0.0109914	0.0109914
13.441	562.241	551.363	374.995	648.882		13.441	537.241	526.363	349.995	623.882		13.441	0.879997	0.914771	0.912162	0.961468	0.917099	0.0335411	0.0167706
13.4794	565.596	545.635	373.676	643.205		13.4794	540.596	520.635	348.676	618.205		13.4794	0.885492	0.904817	0.908724	0.952719	0.912938	0.0283993	0.0141996
13.5015	568.44	551.895	371.371	642.509		13.5015	543.44	526.895	346.371	617.509		13.5015	0.89015	0.915696	0.902717	0.951647	0.915053	0.026532	0.013266
13.5399	576.863	551.003	373.772	648.685		13.5399	551.863	526.003	348.772	623.685		13.5399	0.903947	0.914146	0.908974	0.961165	0.922058	0.0264015	0.0132007	0.0132007
13.5657	569.996	551.28	365.999	637.847		13.5657	544.996	526.28	340.999	612.847		13.5657	0.892699	0.914627	0.888716	0.944462	0.910126	0.0255689	0.0127844
13.6041	564.81	547.178	374.909	637.134		13.6041	539.81	522.178	349.909	612.134		13.6041	0.884205	0.907498	0.911938	0.943363	0.911751	0.0243329	0.0121664
13.6262	572.268	545.989	368.675	642.356		13.6262	547.268	520.989	343.675	617.356		13.6262	0.896421	0.905432	0.89569	0.951411	0.912239	0.0264881	0.013244
13.6647	575.83	556.029	375.982	634.977		13.6647	550.83	531.029	350.982	609.977		13.6647	0.902255	0.922881	0.914734	0.940039	0.919977	0.0158374	0.00791871	0.00791871
13.6905	564.364	547.134	374.258	626.265		13.6905	539.364	522.134	349.258	601.265		13.6905	0.883474	0.907422	0.910241	0.926613	0.906937	0.017784	0.008892
13.7289	567.33	553.327	368.943	639.638		13.7289	542.33	528.327	343.943	614.638		13.7289	0.888332	0.918185	0.896389	0.947222	0.912532	0.0263413	0.0131707
13.751	568.569	556.515	376.665	641.54		13.751	543.569	531.515	351.665	616.54		13.751	0.890362	0.923725	0.916514	0.950153	0.920189	0.0245869	0.0122934
13.7894	575.298	552.696	378.193	639.712		13.7894	550.298	527.696	353.193	614.712		13.7894	0.901384	0.917088	0.920496	0.947336	0.921576	0.0190843	0.00954213	0.00954213
13.8152	576.63	549.285	370.764	635.616		13.8152	551.63	524.285	345.764	610.616		13.8152	0.903566	0.91116	0.901135	0.941024	0.914221	0.0183716	0.00918582
13.8536	567.609	554.139	374.573	645.958		13.8536	542.609	529.139	349.573	620.958		13.8536	0.888789	0.919596	0.911062	0.956962	0.919102	0.028385	0.0141925
13.8757	572.022	554.116	374.513	642.093		13.8757	547.022	529.116	349.513	617.093		13.8757	0.896018	0.919556	0.910906	0.951006	0.919371	0.0232223	0.0116112
13.9141	567.547	550.522	368.577	638.125		13.9141	542.547	525.522	343.577	613.125		13.9141	0.888688	0.91331	0.895435	0.944891	0.910581	0.0251218	0.0125609	0.0125609
13.9418	568.217	549.139	372.508	634.564		13.9418	543.217	524.139	347.508	609.564		13.9418	0.889785	0.910906	0.90568	0.939403	0.911444	0.0206906	0.0103453
13.9802	569.78	551.936	372.378	636.207		13.9802	544.78	526.936	347.378	611.207		13.9802	0.892345	0.915767	0.905341	0.941935	0.913847	0.0210339	0.010517
14.0023	563.891	554.663	364.839	641.808		14.0023	538.891	529.663	339.839	616.808		14.0023	0.882699	0.920507	0.885693	0.950566	0.909866	0.0321046	0.0160523
14.0407	572.518	543.581	370.537	647.481		14.0407	547.518	518.581	345.537	622.481		14.0407	0.89683	0.901247	0.900543	0.959309	0.914482	0.0299473	0.0149736	0.0149736
14.0665	562.26	543.612	366.976	639.712		14.0665	537.26	518.612	341.976	614.712		14.0665	0.880028	0.901301	0.891262	0.947336	0.904982	0.0295431	0.0147715
14.1049	571.667	550.445	371.185	639.141		14.1049	546.667	525.445	346.185	614.141		14.1049	0.895436	0.913176	0.902232	0.946456	0.914325	0.0226331	0.0113165
14.1271	569.553	560.938	371	635.596		14.1271	544.553	535.938	346	610.596		14.1271	0.891974	0.931412	0.90175	0.940993	0.916532	0.0233908	0.0116954
14.1655	568.704	566.252	374.901	636.605		14.1655	543.704	541.252	349.901	611.605		14.1655	0.890583	0.940647	0.911917	0.942548	0.921424	0.0248819	0.0124409	0.0124409
14.1913	568.148	550.746	370.477	638.081		14.1913	543.148	525.746	345.477	613.081		14.1913	0.889672	0.913699	0.900387	0.944823	0.912145	0.0238993	0.0119497
14.2297	570.976	562.583	374.262	635.258		14.2297	545.976	537.583	349.262	610.258		14.2297	0.894304	0.934271	0.910251	0.940472	0.919825	0.0214316	0.0107158
14.2518	574.314	560.542	365.46	650.816		14.2518	549.314	535.542	340.46	625.816		14.2518	0.899772	0.930724	0.887311	0.964449	0.920564	0.0344825	0.0172413
14.2902	573.124	556.419	373.792	647.158		14.2902	548.124	531.419	348.792	622.158		14.2902	0.897823	0.923558	0.909026	0.958811	0.922305	0.0265203	0.0132602	0.0132602
14.316	560.498	547.508	364.539	637.882		14.316	535.498	522.508	339.539	612.882		14.316	0.877141	0.908072	0.884911	0.944516	0.90366	0.0302403	0.0151202
14.3544	571.124	547.965	369.301	639.79		14.3544	546.124	522.965	344.301	614.79		14.3544	0.894547	0.908866	0.897322	0.947457	0.912048	0.0244065	0.0122033
14.3765	569.391	544.862	371.19	635.094		14.3765	544.391	519.862	346.19	610.094		14.3765	0.891708	0.903473	0.902245	0.940219	0.909411	0.0212066	0.0106033
14.4149	566.026	549.206	380.395	639.762		14.4149	541.026	524.206	355.395	614.762		14.4149	0.886196	0.911023	0.926235	0.947413	0.917717	0.0257734	0.0128867	0.0128867
14.4407	577.308	555.669	377.091	642.119		14.4407	552.308	530.669	352.091	617.119		14.4407	0.904676	0.922255	0.917624	0.951046	0.9239	0.0195665	0.00978323
14.4792	573.951	555.162	374.279	634.501		14.4792	548.951	530.162	349.279	609.501		14.4792	0.899177	0.921374	0.910296	0.939306	0.917538	0.0171085	0.00855426
14.5013	566.329	551.155	372.22	631.928		14.5013	541.329	526.155	347.22	606.928		14.5013	0.886693	0.91441	0.904929	0.93534	0.910343	0.0202489	0.0101244
14.5397	572.3	555.577	375.436	638.279		14.5397	547.3	530.577	350.436	613.279		14.5397	0.896473	0.922095	0.913311	0.945128	0.919252	0.0202634	0.0101317	0.0101317
14.5655	573.389	550.482	376.663	642.045		14.5655	548.389	525.482	351.663	617.045		14.5655	0.898257	0.91324	0.916509	0.950932	0.919734	0.0222646	0.0111323
14.6039	568.852	554.865	381.567	629.146		14.6039	543.852	529.865	356.567	604.146		14.6039	0.890825	0.920858	0.92929	0.931053	0.918006	0.018659	0.00932948
14.626	570.272	558.403	370.614	634.232		14.626	545.272	533.403	345.614	609.232		14.626	0.893151	0.927006	0.900744	0.938891	0.914948	0.0215679	0.010784
14.6644	573.026	552.995	374.225	634.482		14.6644	548.026	527.995	349.225	609.482		14.6644	0.897662	0.917608	0.910155	0.939276	0.916175	0.0174613	0.00873063	0.00873063
14.6902	567.377	549.496	374.56	634.712		14.6902	542.377	524.496	349.56	609.712		14.6902	0.888409	0.911527	0.911028	0.939631	0.912649	0.020972	0.010486
14.7286	574.736	551.414	372.691	640.238		14.7286	549.736	526.414	347.691	615.238		14.7286	0.900463	0.91486	0.906157	0.948147	0.917407	0.0213314	0.0106657
14.7508	568.047	552.512	365.937	632.787		14.7508	543.047	527.512	340.937	607.787		14.7508	0.889507	0.916768	0.888555	0.936664	0.907873	0.0232277	0.0116138
14.7892	575.035	550.287	375.339	635.809		14.7892	550.035	525.287	350.339	610.809		14.7892	0.900953	0.912901	0.913058	0.941321	0.917059	0.0171402	0.00857009	0.00857009
14.8168	573.528	551.334	378.614	628.425		14.8168	548.528	526.334	353.614	603.425		14.8168	0.898485	0.914721	0.921594	0.929942	0.916185	0.0133411	0.00667054
14.8412	576.98	549.119	378.999	628.192		14.8412	551.98	524.119	353.999	603.192		14.8412	0.904139	0.910872	0.922597	0.929583	0.916798	0.0114376	0.00571879
14.8796	573.283	551.049	371.076	624.842		14.8796	548.283	526.049	346.076	599.842		14.8796	0.898083	0.914226	0.901948	0.92442	0.909669	0.0120028	0.0060014
14.9017	573.708	549.175	371.789	629.691		14.9017	548.708	524.175	346.789	604.691		14.9017	0.898779	0.910969	0.903806	0.931893	0.911362	0.0145726	0.00728631	0.00728631
14.9401	572.466	554.019	374.872	637.679		14.9401	547.466	529.019	349.872	612.679		14.9401	0.896745	0.919387	0.911841	0.944203	0.918044	0.0198178	0.00990889
14.9659	569.32	545.525	374.76	632.794		14.9659	544.32	520.525	349.76	607.794		14.9659	0.891592	0.904626	0.911549	0.936675	0.91111	0.0189452	0.00947261
15.0043	568.463	554.689	376.422	630.621		15.0043	543.463	529.689	351.422	605.621		15.0043	0.890188	0.920552	0.915881	0.933326	0.914987	0.0181022	0.00905112
15.0265	571.198	556.573	374.038	622.87		15.0265	546.198	531.573	349.038	597.87		15.0265	0.894668	0.923826	0.909668	0.921381	0.912386	0.0133304	0.00666521	0.00666521
15.0649	578.369	552.056	368.313	624.081		15.0649	553.369	527.056	343.313	599.081		15.0649	0.906414	0.915976	0.894747	0.923247	0.910096	0.012338	0.00616899
15.0907	581.071	562.422	374.068	635.729		15.0907	556.071	537.422	349.068	610.729		15.0907	0.91084	0.933991	0.909746	0.941198	0.923944	0.0160411	0.00802056
15.1291	570.162	562.415	369.714	629.288		15.1291	545.162	537.415	344.714	604.288		15.1291	0.892971	0.933979	0.898398	0.931272	0.914155	0.0214709	0.0107355
15.1512	575.862	559.078	374.445	647.267		15.1512	550.862	534.078	349.445	622.267		15.1512	0.902308	0.928179	0.910728	0.958979	0.925049	0.0250554	0.0125277	0.0125277
15.1896	568.743	550.9	376.182	628.128		15.1896	543.743	525.9	351.182	603.128		15.1896	0.890647	0.913967	0.915255	0.929484	0.912338	0.0160796	0.00803982
15.2154	574.079	550.31	367.384	634.083		15.2154	549.079	525.31	342.384	609.083		15.2154	0.899387	0.912941	0.892326	0.938661	0.910829	0.0204319	0.010216
15.2538	571.9	554.655	370.653	627.963		15.2538	546.9	529.655	345.653	602.963		15.2538	0.895818	0.920493	0.900846	0.92923	0.911596	0.0158601	0.00793003
15.2759	573.714	546.572	381.233	629.361		15.2759	548.714	521.572	356.233	604.361		15.2759	0.898789	0.906445	0.928419	0.931384	0.916259	0.0161054	0.00805271	0.00805271
15.3143	559.977	548.512	371.305	634.139		15.3143	534.977	523.512	346.305	609.139		15.3143	0.876288	0.909817	0.902545	0.938748	0.906849	0.0256829	0.0128414
15.3401	570.318	554.998	372.886	645.064		15.3401	545.318	529.998	347.886	620.064		15.3401	0.893227	0.921089	0.906665	0.955584	0.919141	0.0268273	0.0134136
15.3786	568.979	562.072	375.136	626.854		15.3786	543.979	537.072	350.136	601.854		15.3786	0.891033	0.933383	0.912529	0.927521	0.916116	0.0188875	0.00944376
15.4007	561.415	548.404	373.949	643.093		15.4007	536.415	523.404	348.949	618.093		15.4007	0.878644	0.909629	0.909436	0.952547	0.912564	0.0303734	0.0151867	0.0151867
15.4391	570.263	547.201	366.664	637.234		15.4391	545.263	522.201	341.664	612.234		15.4391	0.893136	0.907538	0.890449	0.943517	0.90866	0.0244193	0.0122096
15.4667	576.694	551.893	368.443	636.06		15.4667	551.694	526.893	343.443	611.06		15.4667	0.90367	0.915693	0.895086	0.941708	0.914039	0.02029	0.010145
15.5051	563.552	557.192	363.532	628.564		15.5051	538.552	532.192	338.532	603.564		15.5051	0.882144	0.924902	0.882287	0.930156	0.904872	0.0262497	0.0131248
15.5273	571.591	548.469	369.175	639.901		15.5273	546.591	523.469	344.175	614.901		15.5273	0.895312	0.909742	0.896994	0.947628	0.912419	0.0243407	0.0121704	0.0121704
15.5657	569.239	550.689	367.325	627.167		15.5657	544.239	525.689	342.325	602.167		15.5657	0.891459	0.9136	0.892172	0.928003	0.906309	0.0177404	0.0088702
15.5915	570.785	548.818	366.985	628.431		15.5915	545.785	523.818	341.985	603.431		15.5915	0.893992	0.910348	0.891286	0.929951	0.906394	0.0178199	0.00890996
15.6299	564.436	550.754	366.271	632.699		15.6299	539.436	525.754	341.271	607.699		15.6299	0.883592	0.913713	0.889425	0.936529	0.905815	0.0242775	0.0121388
15.652	573.393	544.602	377.498	643.411		15.652	548.393	519.602	352.498	618.411		15.652	0.898263	0.903021	0.918685	0.953037	0.918252	0.0247769	0.0123885	0.0123885
15.6904	561.246	555.974	374.695	628.349		15.6904	536.246	530.974	349.695	603.349		15.6904	0.878367	0.922785	0.91138	0.929825	0.910589	0.0227864	0.0113932
15.7162	563.612	552.314	367.308	630.996		15.7162	538.612	527.314	342.308	605.996		15.7162	0.882242	0.916424	0.892128	0.933904	0.906175	0.0234097	0.0117049
15.7546	569.979	541.047	368.009	639.564		15.7546	544.979	516.047	343.009	614.564		15.7546	0.892671	0.896843	0.893955	0.947108	0.907644	0.026367	0.0131835
15.7767	568.727	551.46	370.277	629.034		15.7767	543.727	526.46	345.277	604.034		15.7767	0.890621	0.91494	0.899866	0.93088	0.909077	0.0176565	0.00882824	0.00882824
15.8152	569.018	555.71	371.316	635.948		15.8152	544.018	530.71	346.316	610.948		15.8152	0.891097	0.922326	0.902573	0.941536	0.914383	0.0222265	0.0111132
15.841	566.627	546.411	369.219	626.674		15.841	541.627	521.411	344.219	601.674		15.841	0.887181	0.906165	0.897108	0.927243	0.904424	0.0170744	0.0085372
15.8794	571.401	552.671	368.925	638.429		15.8794	546.401	527.671	343.925	613.429		15.8794	0.895001	0.917045	0.896342	0.945359	0.913437	0.0235526	0.0117763
15.9015	573.814	549.744	364.834	632.864		15.9015	548.814	524.744	339.834	607.864		15.9015	0.898953	0.911958	0.88568	0.936783	0.908343	0.0217844	0.0108922	0.0108922
15.9399	577.129	558.823	363.631	635.492		15.9399	552.129	533.823	338.631	610.492		15.9399	0.904383	0.927736	0.882545	0.940833	0.913874	0.0257588	0.0128794
15.9657	574.422	554.524	366.644	634.285		15.9657	549.422	529.524	341.644	609.285		15.9657	0.899949	0.920265	0.890397	0.938973	0.912396	0.0216573	0.0108287
16.0041	578.45	556.593	370.127	641.26		16.0041	553.45	531.593	345.127	616.26		16.0041	0.906547	0.923861	0.899475	0.949722	0.919901	0.0223647	0.0111823
16.0262	569.455	559.553	363.567	637.514		16.0262	544.455	534.553	338.567	612.514		16.0262	0.891813	0.929005	0.882378	0.943949	0.911786	0.0294092	0.0147046	0.0147046
16.0646	569.368	554.118	371.006	638.605		16.0646	544.368	529.118	346.006	613.605		16.0646	0.89167	0.919559	0.901766	0.94563	0.914656	0.0236499	0.0118249
16.0904	570.522	559.542	369.459	640.347		16.0904	545.522	534.542	344.459	615.347		16.0904	0.893561	0.928986	0.897734	0.948315	0.917149	0.0261074	0.0130537
16.1289	566.25	555.747	357.628	645.883		16.1289	541.25	530.747	332.628	620.883		16.1289	0.886563	0.92239	0.8669	0.956846	0.908175	0.0397564	0.0198782
16.151	570.098	557.188	375.715	644.101		16.151	545.098	532.188	350.715	619.101		16.151	0.892866	0.924895	0.914038	0.9541	0.921475	0.0254942	0.0127471	0.0127471
16.1894	566.17	566.679	370.122	638.592		16.1894	541.17	541.679	345.122	613.592		16.1894	0.886432	0.941389	0.899462	0.94561	0.918223	0.0297175	0.0148587
16.2152	571.921	561.073	372.436	639.724		16.2152	546.921	536.073	347.436	614.724		16.2152	0.895852	0.931647	0.905492	0.947355	0.920087	0.0236466	0.0118233
16.2536	573.807	557.681	365.901	633.42		16.2536	548.807	532.681	340.901	608.42		16.2536	0.898942	0.925752	0.888461	0.93764	0.912698	0.0228704	0.0114352
16.2757	569.908	555.696	370.291	637.186		16.2757	544.908	530.696	345.291	612.186		16.2757	0.892555	0.922302	0.899902	0.943443	0.914551	0.0230454	0.0115227	0.0115227
16.3141	563.265	543	375.542	621.769		16.3141	538.265	518	350.542	596.769		16.3141	0.881674	0.900237	0.913587	0.919684	0.903796	0.0168361	0.00841804
16.3418	577.425	564.688	374.544	628.534		16.3418	552.425	539.688	349.544	603.534		16.3418	0.904868	0.937929	0.910986	0.93011	0.920973	0.0156002	0.00780012
16.3802	567.658	552.066	372.458	621.2		16.3802	542.658	527.066	347.458	596.2		16.3802	0.88887	0.915993	0.90555	0.918807	0.907305	0.0135491	0.00677457
16.4023	567.301	556.299	376.865	636.742		16.4023	542.301	531.299	351.865	611.742		16.4023	0.888285	0.92335	0.917035	0.942759	0.917857	0.0225498	0.0112749	0.0112749
16.4407	564.181	550.956	371.98	628.611		16.4407	539.181	525.956	346.98	603.611		16.4407	0.883174	0.914064	0.904304	0.930228	0.907943	0.019671	0.00983551
16.4665	569.275	554.787	361.682	632.344		16.4665	544.275	529.787	336.682	607.344		16.4665	0.891518	0.920722	0.877465	0.935981	0.906422	0.0267013	0.0133506
16.5049	571.29	546.485	365.164	629.61		16.5049	546.29	521.485	340.164	604.61		16.5049	0.894819	0.906294	0.88654	0.931768	0.904855	0.0196854	0.00984271
16.527	572.97	553.54	369.624	631.201		16.527	547.97	528.54	344.624	606.201		16.527	0.897571	0.918555	0.898164	0.93422	0.912127	0.0176662	0.00883308	0.00883308
16.5654	565.153	551.471	366.593	637.567		16.5654	540.153	526.471	341.593	612.567		16.5654	0.884766	0.914959	0.890264	0.944031	0.908505	0.02708	0.01354
16.5913	567.519	548.329	368.6	637.185		16.5913	542.519	523.329	343.6	612.185		16.5913	0.888642	0.909499	0.895495	0.943442	0.909269	0.0243793	0.0121896
16.6297	567.46	550.022	374.278	651.311		16.6297	542.46	525.022	349.278	626.311		16.6297	0.888545	0.912441	0.910293	0.965212	0.919123	0.0325667	0.0162834
16.6518	567.73	548.627	375.374	633.735		16.6518	542.73	523.627	350.374	608.735		16.6518	0.888987	0.910017	0.913149	0.938125	0.91257	0.0201334	0.0100667	0.0100667
16.6902	567.233	552.72	376.256	631.474		16.6902	542.233	527.72	351.256	606.474		16.6902	0.888173	0.91713	0.915448	0.934641	0.913848	0.0191907	0.00959537
16.716	566.627	554.493	370.836	632.227		16.716	541.627	529.493	345.836	607.227		16.716	0.887181	0.920211	0.901322	0.935801	0.911129	0.0212986	0.0106493
16.7544	562.82	550.247	371.301	633.561		16.7544	537.82	525.247	346.301	608.561		16.7544	0.880945	0.912832	0.902534	0.937857	0.908542	0.0236323	0.0118162
16.7765	567.055	552.716	369.424	645.847		16.7765	542.055	527.716	344.424	620.847		16.7765	0.887882	0.917123	0.897643	0.956791	0.91486	0.0304827	0.0152414	0.0152414
16.8149	572.706	549.608	372.733	643.799		16.8149	547.706	524.608	347.733	618.799		16.8149	0.897138	0.911721	0.906266	0.953635	0.91719	0.0250302	0.0125151
16.8407	577.385	547.724	379.853	641.369		16.8407	552.385	522.724	354.853	616.369		16.8407	0.904802	0.908447	0.924823	0.94989	0.921991	0.0205366	0.0102683
16.8791	560.885	549.747	375.457	646.771		16.8791	535.885	524.747	350.457	621.771		16.8791	0.877775	0.911963	0.913366	0.958215	0.91533	0.0329882	0.0164941
16.9013	575.447	558.123	372.93	634.291		16.9013	550.447	533.123	347.93	609.291		16.9013	0.901628	0.92652	0.90678	0.938982	0.918477	0.0173768	0.00868838	0.00868838
16.9397	572.152	557.735	370.104	642.649		16.9397	547.152	532.735	345.104	617.649		16.9397	0.896231	0.925845	0.899415	0.951863	0.918338	0.0259941	0.0129971
16.9655	575.226	554.838	367.338	643.39		16.9655	550.226	529.838	342.338	618.39		16.9655	0.901266	0.920811	0.892206	0.953004	0.916822	0.0269136	0.0134568
17.0039	578.84	549.98	371.946	627.841		17.0039	553.84	524.98	346.946	602.841		17.0039	0.907186	0.912368	0.904215	0.929042	0.913203	0.0110838	0.00554191
17.026	575.272	546.937	369.77	644.802		17.026	550.272	521.937	344.77	619.802		17.026	0.901341	0.907079	0.898544	0.955181	0.915536	0.0266672	0.0133336	0.0133336
17.0644	570.473	549.162	372.343	635.41		17.0644	545.473	524.162	347.343	610.41		17.0644	0.89348	0.910946	0.90525	0.940706	0.912596	0.0201021	0.0100511
17.0902	580.332	556.954	373.085	643.765		17.0902	555.332	531.954	348.085	618.765		17.0902	0.909629	0.924488	0.907184	0.953582	0.923721	0.0213256	0.0106628
17.1286	581.097	557.103	366.474	640.468		17.1286	556.097	532.103	341.474	615.468		17.1286	0.910882	0.924747	0.889954	0.948501	0.918521	0.0245764	0.0122882
17.1507	575.708	547.601	370.665	648.485		17.1507	550.708	522.601	345.665	623.485		17.1507	0.902055	0.908233	0.900877	0.960856	0.918006	0.0287489	0.0143744	0.0143744
17.1892	570.083	551.769	372.44	639.015		17.1892	545.083	526.769	347.44	614.015		17.1892	0.892842	0.915477	0.905503	0.946262	0.915021	0.0227943	0.0113971
17.2168	575.244	554.854	378.882	641.196		17.2168	550.244	529.854	353.882	616.196		17.2168	0.901295	0.920839	0.922292	0.949623	0.923512	0.0198664	0.00993318
17.2552	575.999	560.573	381.212	636.704		17.2552	550.999	535.573	356.212	611.704		17.2552	0.902532	0.930778	0.928365	0.942701	0.926094	0.0169119	0.00845597
17.2773	579.786	552.304	374.128	628.82		17.2773	554.786	527.304	349.128	603.82		17.2773	0.908735	0.916407	0.909902	0.930551	0.916399	0.0100202	0.00501009	0.00501009
17.3157	570.631	549.618	366.885	645.664		17.3157	545.631	524.618	341.885	620.664		17.3157	0.893739	0.911739	0.891025	0.956509	0.913253	0.0302667	0.0151334
17.3415	573.639	557.492	368.45	647.181		17.3415	548.639	532.492	343.45	622.181		17.3415	0.898666	0.925423	0.895104	0.958847	0.91951	0.0295097	0.0147548
17.38	580.784	555.046	365.297	641.245		17.38	555.784	530.046	340.297	616.245		17.38	0.91037	0.921172	0.886887	0.949699	0.917032	0.0260601	0.0130301
17.4021	573.068	553.275	364.1	637.694		17.4021	548.068	528.275	339.1	612.694		17.4021	0.897731	0.918094	0.883767	0.944226	0.910955	0.0262806	0.0131403	0.0131403
17.4405	572.356	552.445	373.817	637.897		17.4405	547.356	527.445	348.817	612.897		17.4405	0.896565	0.916652	0.909092	0.944539	0.916712	0.020317	0.0101585
17.4663	574.255	555.408	372.19	649.714		17.4663	549.255	530.408	347.19	624.714		17.4663	0.899675	0.921801	0.904851	0.96275	0.92227	0.0285938	0.0142969
17.5047	575.989	553.301	377.834	643.701		17.5047	550.989	528.301	352.834	618.701		17.5047	0.902516	0.91814	0.919561	0.953484	0.923425	0.0214756	0.0107378
17.5268	579.901	553.898	371.89	634.927		17.5268	554.901	528.898	346.89	609.927		17.5268	0.908923	0.919177	0.904069	0.939962	0.918033	0.0159181	0.00795906	0.00795906
17.5652	577.225	557.298	377.162	648.252		17.5652	552.225	532.298	352.162	623.252		17.5652	0.90454	0.925086	0.917809	0.960497	0.926983	0.0239071	0.0119535
17.591	583.715	552.314	363.478	649.931		17.591	558.715	527.314	338.478	624.931		17.591	0.915171	0.916424	0.882146	0.963085	0.919206	0.0332807	0.0166404
17.6294	573.223	552.175	366.202	634.864		17.6294	548.223	527.175	341.202	609.864		17.6294	0.897985	0.916183	0.889245	0.939865	0.910819	0.0223799	0.0111899
17.6516	571.503	544.419	364.209	642.854		17.6516	546.503	519.419	339.209	617.854		17.6516	0.895168	0.902703	0.884051	0.952178	0.908525	0.0300938	0.0150469	0.0150469
17.69	570.691	557.65	371.594	641.349		17.69	545.691	532.65	346.594	616.349		17.69	0.893838	0.925698	0.903298	0.949859	0.918173	0.0249941	0.012497
17.7158	569.85	564.693	369.151	641.327		17.7158	544.85	539.693	344.151	616.327		17.7158	0.89246	0.937938	0.896931	0.949825	0.919288	0.028867	0.0144335
17.7542	569.562	552.326	375.577	641.935		17.7542	544.562	527.326	350.577	616.935		17.7542	0.891988	0.916445	0.913679	0.950762	0.918219	0.0242959	0.012148
17.7763	569.292	555.66	377.326	636.121		17.7763	544.292	530.66	352.326	611.121		17.7763	0.891546	0.922239	0.918237	0.941802	0.918456	0.0206846	0.0103423	0.0103423
17.8147	565.816	558.846	371.346	640.215		17.8147	540.816	533.846	346.346	615.215		17.8147	0.885852	0.927776	0.902652	0.948111	0.916098	0.0274278	0.0137139
17.8405	571.776	553.765	380.891	644.34		17.8405	546.776	528.765	355.891	619.34		17.8405	0.895615	0.918946	0.927528	0.954469	0.924139	0.0243034	0.0121517
17.8789	573.283	550.863	373.233	641.507		17.8789	548.283	525.863	348.233	616.507		17.8789	0.898083	0.913903	0.90757	0.950103	0.917414	0.0227411	0.0113705
17.901	571.685	548.668	368.099	636.783		17.901	546.685	523.668	343.099	611.783		17.901	0.895466	0.910088	0.894189	0.942822	0.910641	0.022634	0.011317	0.011317
17.9394	569.674	551.008	371.029	636.418		17.9394	544.674	526.008	346.029	611.418		17.9394	0.892172	0.914154	0.901825	0.94226	0.912603	0.021722	0.010861
17.9653	577.209	558.856	376.156	641.581		17.9653	552.209	533.856	351.156	616.581		17.9653	0.904514	0.927794	0.915188	0.950217	0.924428	0.0196497	0.00982486
18.0037	573.305	554.385	371.333	636.153		18.0037	548.305	529.385	346.333	611.153		18.0037	0.898119	0.920023	0.902618	0.941852	0.915653	0.0198562	0.00992812
18.0258	576.734	553.528	373.345	643.725		18.0258	551.734	528.528	348.345	618.725		18.0258	0.903736	0.918534	0.907861	0.953521	0.920913	0.022615	0.0113075	0.0113075
18.0642	574.75	559.68	369.843	641.621		18.0642	549.75	534.68	344.843	616.621		18.0642	0.900486	0.929226	0.898735	0.950278	0.919681	0.0247285	0.0123642
18.0918	572.63	557.216	373.625	645.882		18.0918	547.63	532.216	348.625	620.882		18.0918	0.897014	0.924943	0.908591	0.956845	0.921848	0.0259927	0.0129963
18.1302	577.381	553.137	366.282	638.751		18.1302	552.381	528.137	341.282	613.751		18.1302	0.904796	0.917855	0.889454	0.945855	0.91449	0.0239158	0.0119579
18.1524	569.839	565.024	374.903	646.164		18.1524	544.839	540.024	349.903	621.164		18.1524	0.892442	0.938513	0.911922	0.95728	0.925039	0.0286102	0.0143051	0.0143051
18.1908	562.384	552.085	374.274	648.999		18.1908	537.384	527.085	349.274	623.999		18.1908	0.880231	0.916026	0.910283	0.961649	0.917047	0.0336231	0.0168115
18.2166	568.644	555.982	371.565	641.806		18.2166	543.644	530.982	346.565	616.806		18.2166	0.890485	0.922799	0.903222	0.950563	0.916767	0.0261585	0.0130792
18.255	566.667	552.346	369.208	635.584		18.255	541.667	527.346	344.208	610.584		18.255	0.887246	0.91648	0.89708	0.940975	0.910445	0.0237016	0.0118508
18.2771	571.907	547.87	363.636	634.024		18.2771	546.907	522.87	338.636	609.024		18.2771	0.895829	0.908701	0.882558	0.93857	0.906415	0.0239473	0.0119737	0.0119737
18.3155	569.527	559.886	369.598	640.22		18.3155	544.527	534.886	344.598	615.22		18.3155	0.891931	0.929584	0.898096	0.948119	0.916932	0.0265365	0.0132682
18.3413	570.009	554.469	374.017	634.391		18.3413	545.009	529.469	349.017	609.391		18.3413	0.89272	0.920169	0.909613	0.939136	0.91541	0.0194422	0.00972112
18.3797	574.276	558.951	366.155	642.184		18.3797	549.276	533.951	341.155	617.184		18.3797	0.89971	0.927959	0.889123	0.951146	0.916984	0.0280602	0.0140301
18.4018	571.133	557.258	368.015	641.676		18.4018	546.133	532.258	343.015	616.676		18.4018	0.894562	0.925016	0.89397	0.950363	0.915978	0.0271233	0.0135617	0.0135617
18.4403	567.928	551.463	374.258	645.73		18.4403	542.928	526.463	349.258	620.73		18.4403	0.889312	0.914945	0.910241	0.956611	0.917777	0.0281847	0.0140924
18.4661	566.49	555.375	372.032	642.265		18.4661	541.49	530.375	347.032	617.265		18.4661	0.886956	0.921744	0.90444	0.951271	0.916103	0.0274114	0.0137057
18.5045	565.579	554.183	369.904	644.677		18.5045	540.579	529.183	344.904	619.677		18.5045	0.885464	0.919672	0.898893	0.954988	0.914754	0.0302898	0.0151449
18.5266	568.687	552.407	372.74	651.854		18.5266	543.687	527.407	347.74	626.854		18.5266	0.890555	0.916586	0.906285	0.966048	0.919868	0.0325943	0.0162971	0.0162971
18.565	566.442	557.405	365.699	630.451		18.565	541.442	532.405	340.699	605.451		18.565	0.886878	0.925272	0.887934	0.933064	0.908287	0.0243241	0.012162
18.5908	567.672	554.5	375.71	632.75		18.5908	542.672	529.5	350.71	607.75		18.5908	0.888892	0.920223	0.914025	0.936607	0.914937	0.0198048	0.0099024
18.6292	574.719	544.229	369.471	643.397		18.6292	549.719	519.229	344.471	618.397		18.6292	0.900435	0.902373	0.897765	0.953015	0.913397	0.0264795	0.0132398
18.6513	579.493	550.981	382.419	629.809		18.6513	554.493	525.981	357.419	604.809		18.6513	0.908255	0.914108	0.93151	0.932075	0.921487	0.0121395	0.00606976	0.00606976
18.6897	577.517	550.519	370.594	635.365		18.6897	552.517	525.519	345.594	610.365		18.6897	0.905018	0.913305	0.900692	0.940637	0.914913	0.0179301	0.00896503
18.7155	578.56	551.714	376.19	646.095		18.7155	553.56	526.714	351.19	621.095		18.7155	0.906727	0.915381	0.915276	0.957173	0.923639	0.0227207	0.0113603
18.754	573.522	549.925	366.177	629.844		18.754	548.522	524.925	341.177	604.844		18.754	0.898475	0.912272	0.88918	0.932129	0.908014	0.0186669	0.00933347
18.7761	571.856	552.742	369.526	625.606		18.7761	546.856	527.742	344.526	600.606		18.7761	0.895746	0.917168	0.897908	0.925597	0.909105	0.0146156	0.0073078	0.0073078
18.8145	571.645	561.905	374.75	633.507		18.8145	546.645	536.905	349.75	608.507		18.8145	0.8954	0.933093	0.911523	0.937774	0.919447	0.0196901	0.00984507
18.8403	585.9	551.995	370.76	648.448		18.8403	560.9	526.995	345.76	623.448		18.8403	0.91875	0.91587	0.901124	0.960799	0.924136	0.0256325	0.0128163
18.8787	577.247	562.65	371.139	635.223		18.8787	552.247	537.65	346.139	610.223		18.8787	0.904576	0.934387	0.902112	0.940418	0.920373	0.0198428	0.00992139
18.9008	578.623	551.37	366.816	635.695		18.9008	553.623	526.37	341.816	610.695		18.9008	0.90683	0.914784	0.890845	0.941146	0.913401	0.0210048	0.0105024	0.0105024
18.9392	566.296	555.154	367.29	639.776		18.9392	541.296	530.154	342.29	614.776		18.9392	0.886639	0.92136	0.892081	0.947435	0.911879	0.0281849	0.0140924
18.9669	574.306	554.864	372.014	643.564		18.9669	549.306	529.864	347.014	618.564		18.9669	0.899759	0.920856	0.904393	0.953273	0.91957	0.0242236	0.0121118
19.0053	570.023	552.785	372.047	641.841		19.0053	545.023	527.785	347.047	616.841		19.0053	0.892743	0.917243	0.904479	0.950617	0.916271	0.0249882	0.0124941
19.0274	570.769	564.964	376.549	637.388		19.0274	545.769	539.964	351.549	612.388		19.0274	0.893965	0.938409	0.916212	0.943755	0.923085	0.0227834	0.0113917	0.0113917
19.0658	570.684	547.376	370.839	631.618		19.0658	545.684	522.376	345.839	606.618		19.0658	0.893826	0.907842	0.90133	0.934863	0.909465	0.0178738	0.00893691
19.0916	560.013	551.246	370.274	631.835		19.0916	535.013	526.246	345.274	606.835		19.0916	0.876347	0.914568	0.899858	0.935197	0.906492	0.0247786	0.0123893
19.13	568.649	544.789	375.273	631.923		19.13	543.649	519.789	350.273	606.923		19.13	0.890493	0.903346	0.912886	0.935333	0.910515	0.0189193	0.00945963
19.1521	563.983	550.975	363.517	634.953		19.1521	538.983	525.975	338.517	609.953		19.1521	0.88285	0.914097	0.882248	0.940002	0.904799	0.0277852	0.0138926	0.0138926
19.1906	570.133	553.915	369.578	646.042		19.1906	545.133	528.915	344.578	621.042		19.1906	0.892924	0.919207	0.898044	0.957091	0.916816	0.0291609	0.0145804
19.2164	568.477	557.281	366.483	644.61		19.2164	543.477	532.281	341.483	619.61		19.2164	0.890211	0.925056	0.889978	0.954885	0.915032	0.0312651	0.0156326
19.2548	576.505	555.579	374.753	638.96		19.2548	551.505	530.579	349.753	613.96		19.2548	0.903361	0.922098	0.911531	0.946177	0.920792	0.0185808	0.00929039
19.2769	559.586	546.648	369.551	643.961		19.2769	534.586	521.648	344.551	618.961		19.2769	0.875648	0.906577	0.897973	0.953884	0.908521	0.0329319	0.0164659	0.0164659
19.3153	571.327	547.023	370.505	635.039		19.3153	546.327	522.023	345.505	610.039		19.3153	0.894879	0.907229	0.90046	0.940135	0.910676	0.0202781	0.010139
19.3411	573.838	551.315	368.173	629.11		19.3411	548.838	526.315	343.173	604.11		19.3411	0.898992	0.914688	0.894382	0.930997	0.909765	0.0166106	0.00830531
19.3795	566.389	559.535	363.827	635.63		19.3795	541.389	534.535	338.827	610.63		19.3795	0.886791	0.928974	0.883056	0.941046	0.909966	0.0293739	0.014687
19.4016	565.808	557.84	377.422	645.253		19.4016	540.808	532.84	352.422	620.253		19.4016	0.885839	0.926028	0.918487	0.955876	0.921557	0.0287688	0.0143844	0.0143844
19.44	567.806	561.427	374.092	642.612		19.44	542.806	536.427	349.092	617.612		19.44	0.889112	0.932262	0.909808	0.951806	0.920747	0.0271886	0.0135943
19.4658	564.453	553.903	365.781	636.568		19.4658	539.453	528.903	340.781	611.568		19.4658	0.88362	0.919186	0.888148	0.942491	0.908361	0.0277052	0.0138526
19.5042	568.843	557.835	383.688	641.789		19.5042	543.843	532.835	358.688	616.789		19.5042	0.890811	0.926019	0.934818	0.950537	0.925546	0.0252804	0.0126402
19.5264	569.483	553.357	372.929	634.292		19.5264	544.483	528.357	347.929	609.292		19.5264	0.891859	0.918237	0.906777	0.938984	0.913964	0.0198706	0.00993529	0.00993529
19.5648	560.763	567.196	376.674	638.197		19.5648	535.763	542.196	351.674	613.197		19.5648	0.877576	0.942288	0.916538	0.945002	0.920351	0.0312685	0.0156342
19.5906	568.21	552.736	367.693	640.958		19.5906	543.21	527.736	342.693	615.958		19.5906	0.889774	0.917158	0.893131	0.949257	0.91233	0.0274728	0.0137364
19.629	570.441	554.087	369.548	643.991		19.629	545.441	529.087	344.548	618.991		19.629	0.893428	0.919506	0.897966	0.953931	0.916207	0.0276018	0.0138009
19.6511	565.722	551.832	366.276	637.047		19.6511	540.722	526.832	341.276	612.047		19.6511	0.885698	0.915587	0.889438	0.943229	0.908488	0.0267059	0.0133529	0.0133529
19.6895	566.005	551.05	372.185	635.671		19.6895	541.005	526.05	347.185	610.671		19.6895	0.886162	0.914227	0.904838	0.941109	0.911584	0.02288	0.01144
19.7153	568.917	554.105	368.216	645.486		19.7153	543.917	529.105	343.216	620.486		19.7153	0.890932	0.919537	0.894494	0.956235	0.915299	0.0301125	0.0150563
19.7537	569.199	546.528	372.376	645.062		19.7537	544.199	521.528	347.376	620.062		19.7537	0.891394	0.906369	0.905336	0.955581	0.91467	0.0281161	0.0140581
19.7758	562.335	555.988	370.46	640.274		19.7758	537.335	530.988	345.46	615.274		19.7758	0.88015	0.922809	0.900343	0.948202	0.912876	0.0292955	0.0146477	0.0146477
19.8143	559.174	555.03	369.279	649.347		19.8143	534.174	530.03	344.279	624.347		19.8143	0.874973	0.921144	0.897265	0.962185	0.913892	0.0373094	0.0186547
19.8401	569.612	548.495	370.063	648.34		19.8401	544.612	523.495	345.063	623.34		19.8401	0.89207	0.909787	0.899308	0.960633	0.91545	0.0309879	0.015494
19.8785	564.556	554.564	376.979	642.55		19.8785	539.556	529.564	351.979	617.55		19.8785	0.883788	0.920335	0.917332	0.95171	0.918291	0.027763	0.0138815
19.9006	567.093	556.989	369.365	629.496		19.9006	542.093	531.989	344.365	604.496		19.9006	0.887944	0.924549	0.897489	0.931592	0.910394	0.0209784	0.0104892	0.0104892
19.939	567.845	556.487	373.31	643.227		19.939	542.845	531.487	348.31	618.227		19.939	0.889176	0.923677	0.90777	0.952753	0.918344	0.026926	0.013463
19.9666	576.293	558.221	370.051	638.154		19.9666	551.293	533.221	345.051	613.154		19.9666	0.903014	0.92669	0.899277	0.944935	0.918479	0.0214108	0.0107054
20.0051	573.331	550.279	368.882	645.97		20.0051	548.331	525.279	343.882	620.97		20.0051	0.898162	0.912888	0.89623	0.956981	0.916065	0.0282733	0.0141366
20.0272	575.252	556.416	372.503	640.215		20.0272	550.252	531.416	347.503	615.215		20.0272	0.901308	0.923553	0.905667	0.948111	0.91966	0.0212699	0.010635	0.010635
20.0656	571.574	549.457	380.014	639.227		20.0656	546.574	524.457	355.014	614.227		20.0656	0.895284	0.911459	0.925242	0.946589	0.919644	0.0217392	0.0108696
20.0914	578.198	559.676	371.986	640.016		20.0914	553.198	534.676	346.986	615.016		20.0914	0.906134	0.929219	0.90432	0.947805	0.921869	0.0206741	0.0103371
20.1298	572.455	557.548	366.734	646.901		20.1298	547.455	532.548	341.734	621.901		20.1298	0.896727	0.92552	0.890632	0.958415	0.917824	0.0310451	0.0155225
20.1519	571.324	552.048	364.474	640.044		20.1519	546.324	527.048	339.474	615.044		20.1519	0.894874	0.915962	0.884742	0.947848	0.910857	0.0278797	0.0139399	0.0139399
20.1903	573.278	558.765	378.431	640.588		20.1903	548.278	533.765	353.431	615.588		20.1903	0.898075	0.927635	0.921117	0.948686	0.923878	0.0208406	0.0104203
20.2161	572.483	561.8	377.184	646.715		20.2161	547.483	536.8	352.184	621.715		20.2161	0.896773	0.93291	0.917867	0.958129	0.92642	0.0258178	0.0129089
20.2545	571.534	559.644	374.496	637.397		20.2545	546.534	534.644	349.496	612.397		20.2545	0.895218	0.929163	0.910861	0.943769	0.919753	0.0211842	0.0105921
20.2767	565.113	557.915	372.867	636.271		20.2767	540.113	532.915	347.867	611.271		20.2767	0.884701	0.926158	0.906616	0.942033	0.914877	0.0247897	0.0123948	0.0123948
20.3151	576.122	550.238	370.91	635.273		20.3151	551.122	525.238	345.91	610.273		20.3151	0.902733	0.912816	0.901515	0.940495	0.91439	0.0181255	0.00906273
20.3409	571.624	552.748	369.234	634.022		20.3409	546.624	527.748	344.234	609.022		20.3409	0.895366	0.917178	0.897147	0.938567	0.912065	0.0202478	0.0101239
20.3793	574.059	549.313	374.161	638.745		20.3793	549.059	524.313	349.161	613.745		20.3793	0.899354	0.911209	0.909988	0.945846	0.916599	0.0202116	0.0101058
20.4014	570.065	551.111	365.457	629.177		20.4014	545.065	526.111	340.457	604.177		20.4014	0.892812	0.914334	0.887304	0.931101	0.906388	0.0201855	0.0100928	0.0100928
20.4398	569.403	557.61	375.49	634.037		20.4398	544.403	532.61	350.49	609.037		20.4398	0.891728	0.925628	0.913452	0.938591	0.91735	0.019928	0.00996402
20.4656	564.508	554.98	370.41	636.128		20.4656	539.508	529.98	345.41	611.128		20.4656	0.88371	0.921057	0.900212	0.941813	0.911698	0.0252307	0.0126154	0.0126154
20.504	566.937	550.466	370.913	647.171		20.504	541.937	525.466	345.913	622.171		20.504	0.887689	0.913213	0.901523	0.958831	0.915314	0.0308304	0.0154152	0.0154152
20.5261	574.447	544.488	379.092	638.699		20.5261	549.447	519.488	354.092	613.699		20.5261	0.89999	0.902823	0.922839	0.945775	0.917857	0.0212092	0.0106046	0.0106046
20.5646	575.627	546.431	371.138	635.793		20.5646	550.627	521.431	346.138	610.793		20.5646	0.901923	0.9062	0.90211	0.941297	0.912882	0.0190455	0.00952276	0.00952276
20.5904	571.93	549.79	372.068	642.094		20.5904	546.93	524.79	347.068	617.094		20.5904	0.895867	0.912038	0.904533	0.951007	0.915861	0.0243444	0.0121722	0.0121722
20.6288	576.936	552.074	370.853	640.362		20.6288	551.936	527.074	345.853	615.362		20.6288	0.904067	0.916007	0.901367	0.948338	0.917445	0.0215556	0.0107778	0.0107778
20.6509	568.099	549.077	362.688	647.823		20.6509	543.099	524.077	337.688	622.823		20.6509	0.889592	0.910799	0.880087	0.959836	0.910078	0.0355694	0.0177847	0.0177847
20.6893	571.854	567.416	373.078	648.306		20.6893	546.854	542.416	348.078	623.306		20.6893	0.895743	0.94267	0.907166	0.960581	0.92654	0.0302368	0.0151184	0.0151184
20.7151	576.753	551.651	371.683	636.524		20.7151	551.753	526.651	346.683	611.524		20.7151	0.903767	0.915272	0.90353	0.942423	0.916248	0.0182904	0.00914522	0.00914522
20.7535	571.652	562.256	374.452	637.786		20.7535	546.652	537.256	349.452	612.786		20.7535	0.895412	0.933703	0.910747	0.944368	0.921057	0.0221157	0.0110578	0.0110578
20.7756	575.46	554.82	376.198	635.607		20.7756	550.46	529.82	351.198	610.607		20.7756	0.901649	0.920779	0.915297	0.94101	0.919684	0.0163351	0.00816753	0.00816753
20.814	583.323	563.414	375.159	635.514		20.814	558.323	538.414	350.159	610.514		20.814	0.914529	0.935715	0.912589	0.940867	0.925925	0.0144548	0.00722739	0.00722739
20.8417	577.035	553.073	370.401	637.204		20.8417	552.035	528.073	345.401	612.204		20.8417	0.904229	0.917743	0.900189	0.943471	0.916408	0.0195413	0.00977067	0.00977067
20.8801	572.447	555.179	374.972	637.003		20.8801	547.447	530.179	349.972	612.003		20.8801	0.896714	0.921403	0.912102	0.943161	0.918345	0.0194259	0.00971294	0.00971294
20.9022	576.752	552.301	370.77	633.824		20.9022	551.752	527.301	345.77	608.824		20.9022	0.903765	0.916402	0.90115	0.938262	0.914895	0.0169419	0.00847093	0.00847093
20.9406	576.393	554.729	375.939	623.132		20.9406	551.393	529.729	350.939	598.132		20.9406	0.903177	0.920621	0.914622	0.921785	0.915051	0.00851545	0.00425772	0.00425772
20.9664	570.725	559.953	371.219	626.534		20.9664	545.725	534.953	346.219	601.534		20.9664	0.893893	0.9297	0.902321	0.927028	0.913235	0.0178378	0.00891891	0.00891891
21.0048	573.479	547.704	373.211	640.124		21.0048	548.479	522.704	348.211	615.124		21.0048	0.898404	0.908412	0.907512	0.947971	0.915575	0.0220655	0.0110328	0.0110328
21.027	578.733	547.377	372.464	637.339		21.027	553.733	522.377	347.464	612.339		21.027	0.90701	0.907844	0.905565	0.943679	0.916025	0.0184603	0.00923017	0.00923017
21.0654	567.651	554.869	374.137	639.036		21.0654	542.651	529.869	349.137	614.036		21.0654	0.888858	0.920865	0.909926	0.946295	0.916486	0.023903	0.0119515	0.0119515
21.0912	574.878	546.619	379.393	633.968		21.0912	549.878	521.619	354.393	608.968		21.0912	0.900696	0.906527	0.923624	0.938484	0.917333	0.017132	0.008566	0.008566
21.1296	578.03	562.372	376.307	638.638		21.1296	553.03	537.372	351.307	613.638		21.1296	0.905859	0.933904	0.915581	0.945681	0.925256	0.0179056	0.00895281	0.00895281
21.1517	578.12	551.471	369.381	635.844		21.1517	553.12	526.471	344.381	610.844		21.1517	0.906006	0.914959	0.89753	0.941375	0.914968	0.0189888	0.00949442	0.00949442
21.1901	579.29	555.577	374.397	627.667		21.1901	554.29	530.577	349.397	602.667		21.1901	0.907923	0.922095	0.910603	0.928774	0.917349	0.00978792	0.00489396	0.00489396
21.2159	577.395	556.542	376.084	635.689		21.2159	552.395	531.542	351.084	610.689		21.2159	0.904819	0.923772	0.915	0.941136	0.921182	0.0153934	0.00769668	0.00769668
21.2543	575.07	557.14	372.848	639.346		21.2543	550.07	532.14	347.848	614.346		21.2543	0.90101	0.924811	0.906566	0.946772	0.91979	0.0206624	0.0103312	0.0103312
21.2764	570.856	547.145	376.62	634.961		21.2764	545.856	522.145	351.62	609.961		21.2764	0.894108	0.907441	0.916397	0.940015	0.91449	0.0193241	0.00966203	0.00966203
21.3148	571.877	556.683	375.773	631.052		21.3148	546.877	531.683	350.773	606.052		21.3148	0.89578	0.924017	0.914189	0.93399	0.916994	0.01629	0.00814499	0.00814499
21.3406	571.876	552.862	377.626	631.61		21.3406	546.876	527.862	352.626	606.61		21.3406	0.895779	0.917377	0.919019	0.93485	0.916756	0.0160516	0.00802579	0.00802579
21.3791	577.533	562.256	381.164	627.093		21.3791	552.533	537.256	356.164	602.093		21.3791	0.905045	0.933703	0.928239	0.927889	0.923719	0.0127309	0.00636543	0.00636543
21.4012	577.527	551.372	373.223	630.944		21.4012	552.527	526.372	348.223	605.944		21.4012	0.905035	0.914787	0.907544	0.933824	0.915297	0.0130248	0.00651238	0.00651238
21.4396	574.88	551.536	371.799	638.325		21.4396	549.88	526.536	346.799	613.325		21.4396	0.900699	0.915072	0.903832	0.945199	0.916201	0.0202932	0.0101466	0.0101466
21.4654	567.664	545.065	372.842	636.062		21.4654	542.664	520.065	347.842	611.062		21.4654	0.888879	0.903826	0.906551	0.941711	0.910242	0.0223716	0.0111858	0.0111858
21.5038	568.55	563.171	383.937	635.813		21.5038	543.55	538.171	358.937	610.813		21.5038	0.890331	0.935293	0.935466	0.941328	0.925604	0.0236825	0.0118412	0.0118412
21.5259	567.377	556.322	373.483	633.487		21.5259	542.377	531.322	348.483	608.487		21.5259	0.888409	0.92339	0.908221	0.937743	0.914441	0.0211298	0.0105649	0.0105649
21.5643	567.955	545.154	372.59	640.187		21.5643	542.955	520.154	347.59	615.187		21.5643	0.889356	0.903981	0.905894	0.948068	0.911825	0.0252662	0.0126331	0.0126331
21.5901	572.534	549.826	372.288	647.286		21.5901	547.534	524.826	347.288	622.286		21.5901	0.896856	0.9121	0.905107	0.959009	0.918268	0.0278659	0.0139329	0.0139329
21.6285	574.47	554.976	372.825	639.01		21.6285	549.47	529.976	347.825	614.01		21.6285	0.900028	0.921051	0.906506	0.946254	0.91846	0.0205093	0.0102546	0.0102546
21.6507	578.663	559.947	376.792	640.786		21.6507	553.663	534.947	351.792	615.786		21.6507	0.906896	0.92969	0.916845	0.948991	0.925605	0.0181695	0.00908473	0.00908473
21.6891	564.528	559.582	369.009	641.108		21.6891	539.528	534.582	344.009	616.108		21.6891	0.883743	0.929055	0.896561	0.949488	0.914712	0.0300202	0.0150101	0.0150101
21.7167	560.728	553.774	371.825	629.754		21.7167	535.728	528.774	346.825	604.754		21.7167	0.877518	0.918962	0.9039	0.93199	0.908092	0.0233922	0.0116961	0.0116961
21.7551	572.123	551.596	366.843	628.753		21.7551	547.123	526.596	341.843	603.753		21.7551	0.896183	0.915176	0.890916	0.930447	0.908181	0.0181361	0.00906807	0.00906807
21.7772	571.11	560.794	370.251	633.113		21.7772	546.11	535.794	345.251	608.113		21.7772	0.894524	0.931162	0.899798	0.937167	0.915662	0.0216116	0.0108058	0.0108058
21.8157	575.92	560.843	369.372	643.262		21.8157	550.92	535.843	344.372	618.262		21.8157	0.902403	0.931247	0.897507	0.952807	0.920991	0.0259132	0.0129566	0.0129566
21.8415	570.155	545.674	370.8	644.334		21.8415	545.155	520.674	345.8	619.334		21.8415	0.89296	0.904884	0.901229	0.954459	0.913383	0.0278348	0.0139174	0.0139174
21.8799	573.95	553.413	380.877	643.201		21.8799	548.95	528.413	355.877	618.201		21.8799	0.899176	0.918334	0.927491	0.952713	0.924429	0.022243	0.0111215	0.0111215
21.902	570.525	558.843	375.346	637.559		21.902	545.525	533.843	350.346	612.559		21.902	0.893566	0.927771	0.913076	0.944018	0.919608	0.0214737	0.0107369	0.0107369
21.9404	563.039	553.729	375.059	633.997		21.9404	538.039	528.729	350.059	608.997		21.9404	0.881304	0.918883	0.912329	0.938529	0.912761	0.0237432	0.0118716	0.0118716
21.9662	573.975	553.166	381.213	637.103		21.9662	548.975	528.166	356.213	612.103		21.9662	0.899217	0.917905	0.928367	0.943316	0.922201	0.0185345	0.00926724	0.00926724
22.0046	575.184	548.936	367.379	634.902		22.0046	550.184	523.936	342.379	609.902		22.0046	0.901197	0.910554	0.892313	0.939924	0.910997	0.0206727	0.0103364	0.0103364
22.0267	568.109	550.575	373.77	642.094		22.0267	543.109	525.575	348.77	617.094		22.0267	0.889608	0.913402	0.908969	0.951007	0.915747	0.0256772	0.0128386	0.0128386
22.0651	572.917	552.585	373.646	627.141		22.0651	547.917	527.585	348.646	602.141		22.0651	0.897484	0.916895	0.908646	0.927963	0.912747	0.0128909	0.00644543	0.00644543
22.0909	580.386	555.318	364.861	634.819		22.0909	555.386	530.318	339.861	609.819		22.0909	0.909718	0.921645	0.88575	0.939796	0.914227	0.0226571	0.0113286	0.0113286
22.1294	562.134	561.145	371.548	625.206		22.1294	537.134	536.145	346.548	600.206		22.1294	0.879821	0.931772	0.903178	0.924981	0.909938	0.0234927	0.0117463	0.0117463
22.1515	573.896	555.759	376.7	634.71		22.1515	548.896	530.759	351.7	609.71		22.1515	0.899087	0.922411	0.916605	0.939628	0.919433	0.0167196	0.00835982	0.00835982
22.1899	564.918	557.824	374.624	640.901		22.1899	539.918	532.824	349.624	615.901		22.1899	0.884381	0.926	0.911195	0.949169	0.917686	0.0271515	0.0135758	0.0135758
22.2157	574.149	558.262	371.164	626.124		22.2157	549.149	533.262	346.164	601.124		22.2157	0.899502	0.926761	0.902177	0.926396	0.913709	0.0149013	0.00745063	0.00745063
22.2541	569.687	552.704	372.439	636.001		22.2541	544.687	527.704	347.439	611.001		22.2541	0.892193	0.917102	0.9055	0.941617	0.914103	0.0209768	0.0104884	0.0104884
22.2762	568.434	558.863	366.715	631.343		22.2762	543.434	533.863	341.715	606.343		22.2762	0.890141	0.927806	0.890582	0.934439	0.910742	0.0236893	0.0118446	0.0118446
22.3146	574.178	556.154	372.449	634.123		22.3146	549.178	531.154	347.449	609.123		22.3146	0.899549	0.923098	0.905526	0.938723	0.916724	0.0177477	0.00887386	0.00887386
22.3404	577.465	543.224	374.049	634.064		22.3404	552.465	518.224	349.049	609.064		22.3404	0.904933	0.900627	0.909696	0.938632	0.913472	0.0171775	0.00858876	0.00858876
22.3788	570.618	565.607	375.248	642.538		22.3788	545.618	540.607	350.248	617.538		22.3788	0.893718	0.939526	0.912821	0.951691	0.924439	0.0261348	0.0130674	0.0130674
22.401	582.016	555.557	372.934	635.591		22.401	557.016	530.557	347.934	610.591		22.401	0.912388	0.92206	0.90679	0.940985	0.920556	0.0150093	0.00750465	0.00750465
22.4394	576.918	558.305	376.445	639.013		22.4394	551.918	533.305	351.445	614.013		22.4394	0.904037	0.926836	0.915941	0.946259	0.923268	0.0179335	0.00896673	0.00896673
22.4652	587.988	545.119	369.112	638.726		22.4652	562.988	520.119	344.112	613.726		22.4652	0.92217	0.90392	0.896829	0.945817	0.917184	0.0218704	0.0109352	0.0109352
22.5036	582.031	549.589	367.538	634.792		22.5036	557.031	524.589	342.538	609.792		22.5036	0.912412	0.911688	0.892727	0.939754	0.914146	0.0193527	0.00967636	0.00967636
22.5257	570.651	551.453	378.301	625.376		22.5257	545.651	526.453	353.301	600.376		22.5257	0.893772	0.914928	0.920778	0.925243	0.91368	0.013928	0.006964	0.006964
22.5641	566.602	560.662	374.52	629.826		22.5641	541.602	535.662	349.52	604.826		22.5641	0.88714	0.930932	0.910924	0.932101	0.915274	0.0211249	0.0105625	0.0105625
22.5918	570.376	554.832	371.564	635.889		22.5918	545.376	529.832	346.564	610.889		22.5918	0.893322	0.9208	0.90322	0.941445	0.914697	0.0211449	0.0105725	0.0105725
22.6302	572.756	556.363	367.958	637.826		22.6302	547.756	531.363	342.958	612.826		22.6302	0.89722	0.923461	0.893822	0.94443	0.914733	0.0238192	0.0119096	0.0119096
22.6523	569.053	555.341	369.406	630.158		22.6523	544.053	530.341	344.406	605.158		22.6523	0.891155	0.921685	0.897596	0.932613	0.910762	0.0196177	0.00980886	0.00980886
22.6907	569.629	551.77	372.464	635.705		22.6907	544.629	526.77	347.464	610.705		22.6907	0.892098	0.915479	0.905565	0.941161	0.913576	0.0207367	0.0103684	0.0103684
22.7165	574.479	563.708	368.127	648.351		22.7165	549.479	538.708	343.127	623.351		22.7165	0.900042	0.936226	0.894262	0.96065	0.922795	0.0313326	0.0156663	0.0156663
22.7549	572.973	551.239	363.378	643.254		22.7549	547.973	526.239	338.378	618.254		22.7549	0.897575	0.914556	0.881885	0.952795	0.911703	0.0304706	0.0152353	0.0152353
22.777	571.758	542.195	367.895	642.664		22.777	546.758	517.195	342.895	617.664		22.777	0.895585	0.898838	0.893658	0.951886	0.909992	0.028011	0.0140055	0.0140055
22.8154	560.62	557.151	372.283	626.362		22.8154	535.62	532.151	347.283	601.362		22.8154	0.877341	0.92483	0.905094	0.926763	0.908507	0.0229686	0.0114843	0.0114843
22.8412	576.928	549.2	375.067	633.816		22.8412	551.928	524.2	350.067	608.816		22.8412	0.904054	0.911012	0.912349	0.93825	0.916416	0.0150032	0.00750158	0.00750158
22.8796	571.335	554.147	370.957	637.855		22.8796	546.335	529.147	345.957	612.855		22.8796	0.894892	0.91961	0.901638	0.944474	0.915154	0.0221567	0.0110784	0.0110784
22.9018	565.116	558.651	370.799	634.433		22.9018	540.116	533.651	345.799	609.433		22.9018	0.884706	0.927437	0.901226	0.939201	0.913142	0.0247254	0.0123627	0.0123627
22.9402	564.467	555.63	372.559	629.513		22.9402	539.467	530.63	347.559	604.513		22.9402	0.883643	0.922187	0.905813	0.931619	0.910815	0.0210196	0.0105098	0.0105098
22.966	569.143	564.531	378.128	638.682		22.966	544.143	539.531	353.128	613.682		22.966	0.891302	0.937656	0.920327	0.945749	0.923759	0.0240966	0.0120483	0.0120483
23.0044	582.821	559.165	375.902	630.466		23.0044	557.821	534.165	350.902	605.466		23.0044	0.913706	0.928331	0.914526	0.933087	0.922412	0.0097805	0.00489025	0.00489025
23.0265	570.844	559.402	372.806	629.807		23.0265	545.844	534.402	347.806	604.807		23.0265	0.894088	0.928743	0.906457	0.932072	0.91534	0.0181671	0.00908354	0.00908354
23.0649	566.555	563.921	372.561	630.015		23.0649	541.555	538.921	347.561	605.015		23.0649	0.887063	0.936596	0.905818	0.932392	0.915467	0.0233295	0.0116648	0.0116648
23.0907	570.195	558.137	376.875	633.229		23.0907	545.195	533.137	351.875	608.229		23.0907	0.893025	0.926544	0.917061	0.937345	0.918494	0.0188935	0.00944675	0.00944675
23.1291	563.759	551.33	373.616	629.389		23.1291	538.759	526.33	348.616	604.389		23.1291	0.882483	0.914714	0.908568	0.931427	0.909298	0.0203193	0.0101597	0.0101597
23.1512	572.552	558.911	377.815	632.064		23.1512	547.552	533.911	352.815	607.064		23.1512	0.896886	0.927889	0.919511	0.93555	0.919959	0.0167186	0.00835931	0.00835931
23.1897	566.004	559.355	381.044	634.625		23.1897	541.004	534.355	356.044	609.625		23.1897	0.88616	0.928661	0.927927	0.939497	0.920561	0.023536	0.011768	0.011768
23.2155	566.054	559.957	380.477	644.5		23.2155	541.054	534.957	355.477	619.5		23.2155	0.886242	0.929707	0.926449	0.954715	0.924278	0.0283274	0.0141637	0.0141637
23.2539	571.057	551.864	374.107	628.412		23.2539	546.057	526.864	349.107	603.412		23.2539	0.894437	0.915642	0.909847	0.929922	0.912462	0.0146821	0.00734106	0.00734106
23.276	565.994	553.273	376.87	636.139		23.276	540.994	528.273	351.87	611.139		23.276	0.886144	0.918091	0.917048	0.94183	0.915778	0.0228316	0.0114158	0.0114158
23.3144	570.712	553.667	374.116	639.13		23.3144	545.712	528.667	349.116	614.13		23.3144	0.893872	0.918776	0.909871	0.946439	0.917239	0.0220252	0.0110126	0.0110126
23.3402	570.004	564.146	372.235	637.59		23.3402	545.004	539.146	347.235	612.59		23.3402	0.892712	0.936987	0.904969	0.944066	0.919684	0.0247515	0.0123757	0.0123757
23.3786	578.666	553.072	372.405	638.347		23.3786	553.666	528.072	347.405	613.347		23.3786	0.906901	0.917742	0.905412	0.945233	0.918822	0.018445	0.00922249	0.00922249
23.4007	578.051	553.035	370.753	636.722		23.4007	553.051	528.035	345.753	611.722		23.4007	0.905893	0.917677	0.901106	0.942728	0.916851	0.0186037	0.00930186	0.00930186
23.4391	571.199	560.12	370.827	634.976		23.4391	546.199	535.12	345.827	609.976		23.4391	0.89467	0.92999	0.901299	0.940038	0.916499	0.0219366	0.0109683	0.0109683
23.4668	570.865	549.735	372.438	624.032		23.4668	545.865	524.735	347.438	599.032		23.4668	0.894123	0.911942	0.905498	0.923172	0.908684	0.0121477	0.00607385	0.00607385
23.5052	573.951	554.824	370.234	634.674		23.5052	548.951	529.824	345.234	609.674		23.5052	0.899177	0.920786	0.899754	0.939572	0.914822	0.0193215	0.00966074	0.00966074
23.5273	580.78	551.607	372.248	627.625		23.5273	555.78	526.607	347.248	602.625		23.5273	0.910363	0.915196	0.905002	0.928709	0.914818	0.0101537	0.00507683	0.00507683
23.5657	571.728	556.106	371.918	642.274		23.5657	546.728	531.106	346.918	617.274		23.5657	0.895536	0.923014	0.904142	0.951285	0.918494	0.0246893	0.0123447	0.0123447
23.5915	573.645	556.812	370.354	627.096		23.5915	548.645	531.812	345.354	602.096		23.5915	0.898676	0.924241	0.900066	0.927894	0.912719	0.0154955	0.00774773	0.00774773
23.6299	576.271	561.034	374.578	633.179		23.6299	551.271	536.034	349.578	608.179		23.6299	0.902978	0.931579	0.911075	0.937268	0.920725	0.0163256	0.00816282	0.00816282
23.6521	570.925	560.536	369.907	645.765		23.6521	545.925	535.536	344.907	620.765		23.6521	0.894221	0.930713	0.898901	0.956665	0.920125	0.0292616	0.0146308	0.0146308
23.6905	575.023	567.41	369.319	637.74		23.6905	550.023	542.41	344.319	612.74		23.6905	0.900933	0.94266	0.897369	0.944297	0.921315	0.0256425	0.0128212	0.0128212
23.7163	570.555	568.92	375.987	631.458		23.7163	545.555	543.92	350.987	606.458		23.7163	0.893615	0.945284	0.914747	0.934616	0.922065	0.0228007	0.0114003	0.0114003
23.7547	576.227	567.313	359.818	641.799		23.7547	551.227	542.313	334.818	616.799		23.7547	0.902905	0.942491	0.872607	0.950553	0.917139	0.0362623	0.0181312	0.0181312
23.7768	579.289	565.51	369.997	638.222		23.7768	554.289	540.51	344.997	613.222		23.7768	0.907921	0.939358	0.899136	0.94504	0.922864	0.0227313	0.0113657	0.0113657
23.8152	579.364	555.345	368.541	631.472		23.8152	554.364	530.345	343.541	606.472		23.8152	0.908044	0.921692	0.895341	0.934638	0.914929	0.0169828	0.00849142	0.00849142
23.841	581.454	552.474	370.65	625.726		23.841	556.454	527.474	345.65	600.726		23.841	0.911467	0.916702	0.900838	0.925782	0.913697	0.0104151	0.00520754	0.00520754
23.8794	575.48	563.865	369.276	643.283		23.8794	550.48	538.865	344.276	618.283		23.8794	0.901682	0.936499	0.897257	0.95284	0.922069	0.0269959	0.0134979	0.0134979
23.9015	576.802	562.342	371.33	631.676		23.9015	551.802	537.342	346.33	606.676		23.9015	0.903847	0.933852	0.90261	0.934952	0.918815	0.0180106	0.00900531	0.00900531
23.94	570.002	563.597	365.98	629.111		23.94	545.002	538.597	340.98	604.111		23.94	0.892709	0.936033	0.888667	0.930999	0.912102	0.024867	0.0124335	0.0124335
23.9658	580.847	562.342	370.223	632.897		23.9658	555.847	537.342	345.223	607.897		23.9658	0.910473	0.933852	0.899725	0.936834	0.920221	0.0180453	0.00902265	0.00902265
24.0042	576.866	558.236	368.675	635.713		24.0042	551.866	533.236	343.675	610.713		24.0042	0.903952	0.926716	0.89569	0.941173	0.916883	0.020841	0.0104205	0.0104205
24.0263	576.273	554.465	373.968	642.582		24.0263	551.273	529.465	348.968	617.582		24.0263	0.902981	0.920162	0.909485	0.951759	0.921097	0.0216339	0.010817	0.010817
24.0647	565.716	560.844	365.514	621.793		24.0647	540.716	535.844	340.514	596.793		24.0647	0.885689	0.931249	0.887452	0.919721	0.906028	0.0229662	0.0114831	0.0114831
24.0905	574.847	558.889	370.852	637.31		24.0905	549.847	533.889	345.852	612.31		24.0905	0.900645	0.927851	0.901364	0.943635	0.918374	0.0210678	0.0105339	0.0105339
24.1289	562.086	567.869	366.535	635.529		24.1289	537.086	542.869	341.535	610.529		24.1289	0.879743	0.943457	0.890113	0.94089	0.913551	0.0333374	0.0166687	0.0166687
24.151	576.274	548.562	374.945	635.946		24.151	551.274	523.562	349.945	610.946		24.151	0.902982	0.909904	0.912031	0.941532	0.916612	0.0170566	0.00852829	0.00852829
24.1894	575.933	561.509	372.031	622.659		24.1894	550.933	536.509	347.031	597.659		24.1894	0.902424	0.932404	0.904437	0.921056	0.91508	0.0142512	0.00712562	0.00712562
24.2152	577.807	553.407	366.73	636.684		24.2152	552.807	528.407	341.73	611.684		24.2152	0.905493	0.918324	0.890621	0.94267	0.914277	0.022055	0.0110275	0.0110275
24.2536	577.474	549.778	370.069	629.998		24.2536	552.474	524.778	345.069	604.998		24.2536	0.904948	0.912017	0.899324	0.932366	0.912164	0.0144348	0.0072174	0.0072174
24.2758	582.237	560.948	375.158	634.537		24.2758	557.237	535.948	350.158	609.537		24.2758	0.91275	0.931429	0.912587	0.939361	0.924032	0.0135153	0.00675764	0.00675764
24.3142	573.496	553.404	371.413	630.788		24.3142	548.496	528.404	346.413	605.788		24.3142	0.898432	0.918319	0.902826	0.933583	0.91329	0.0159933	0.00799665	0.00799665
24.3418	563.213	553.856	374.376	646.342		24.3418	538.213	528.856	349.376	621.342		24.3418	0.881589	0.919104	0.910548	0.957554	0.917199	0.0313287	0.0156644	0.0156644
24.3802	568.165	559.694	373.853	634.947		24.3802	543.165	534.694	348.853	609.947		24.3802	0.8897	0.92925	0.909185	0.939993	0.917032	0.0222493	0.0111246	0.0111246
24.4023	570.636	563.927	365.394	640.545		24.4023	545.636	538.927	340.394	615.545		24.4023	0.893747	0.936607	0.887139	0.94862	0.916528	0.030636	0.015318	0.015318
24.4408	575.831	563.132	374.95	643.328		24.4408	550.831	538.132	349.95	618.328		24.4408	0.902257	0.935225	0.912044	0.952909	0.925609	0.0228552	0.0114276	0.0114276
24.4666	578.846	568.061	371.48	634.989		24.4666	553.846	543.061	346.48	609.989		24.4666	0.907195	0.943791	0.903001	0.940058	0.923511	0.0213849	0.0106924	0.0106924
24.505	571.302	570.472	370.045	636.048		24.505	546.302	545.472	345.045	611.048		24.505	0.894838	0.947981	0.899261	0.94169	0.920943	0.0277672	0.0138836	0.0138836
24.5271	572.871	564.248	369.301	647.398		24.5271	547.871	539.248	344.301	622.398		24.5271	0.897408	0.937164	0.897322	0.959181	0.922769	0.03068	0.01534	0.01534
24.5655	573.559	560.32	371.36	638.497		24.5655	548.559	535.32	346.36	613.497		24.5655	0.898535	0.930338	0.902688	0.945464	0.919256	0.0224611	0.0112305	0.0112305
24.5913	568.626	558.769	373.836	640.956		24.5913	543.626	533.769	348.836	615.956		24.5913	0.890455	0.927642	0.909141	0.949253	0.919123	0.0251788	0.0125894	0.0125894
24.6297	565.557	565.112	376.786	648.762		24.6297	540.557	540.112	351.786	623.762		24.6297	0.885428	0.938666	0.916829	0.961283	0.925552	0.032325	0.0161625	0.0161625
24.6518	566.266	557.692	367.727	634.681		24.6518	541.266	532.692	342.727	609.681		24.6518	0.886589	0.925771	0.89322	0.939583	0.911291	0.0254744	0.0127372	0.0127372
24.6902	568.994	565.042	378.943	637.974		24.6902	543.994	540.042	353.943	612.974		24.6902	0.891058	0.938544	0.922451	0.944658	0.924178	0.0239843	0.0119922	0.0119922
24.716	574.201	549.811	368.014	645.697		24.716	549.201	524.811	343.014	620.697		24.716	0.899587	0.912074	0.893968	0.95656	0.915547	0.0283696	0.0141848	0.0141848
24.7545	572.76	555.395	379.826	645.827		24.7545	547.76	530.395	354.826	620.827		24.7545	0.897227	0.921779	0.924752	0.95676	0.925129	0.0244298	0.0122149	0.0122149
24.7766	573.994	560.394	376.773	648.166		24.7766	548.994	535.394	351.773	623.166		24.7766	0.899248	0.930467	0.916796	0.960365	0.926719	0.0258149	0.0129074	0.0129074
24.815	573.038	568.124	367.175	639.785		24.815	548.038	543.124	342.175	614.785		24.815	0.897682	0.943901	0.891781	0.947449	0.920203	0.0295461	0.014773	0.014773
24.8408	571.329	558.22	374.393	637.41		24.8408	546.329	533.22	349.393	612.41		24.8408	0.894883	0.926688	0.910593	0.943789	0.918988	0.0210232	0.0105116	0.0105116
24.8792	573.682	562.399	372.372	635.334		24.8792	548.682	537.399	347.372	610.334		24.8792	0.898737	0.933951	0.905326	0.940589	0.919651	0.0207005	0.0103502	0.0103502
24.9013	564.377	562.469	374.406	635.319		24.9013	539.377	537.469	349.406	610.319		24.9013	0.883495	0.934073	0.910627	0.940566	0.91719	0.0258836	0.0129418	0.0129418
24.9397	569.924	553.479	368.212	641.288		24.9397	544.924	528.479	343.212	616.288		24.9397	0.892581	0.918449	0.894484	0.949765	0.91382	0.0266986	0.0133493	0.0133493
24.9655	575.064	563.574	376.346	643.559		24.9655	550.064	538.574	351.346	618.559		24.9655	0.901	0.935993	0.915683	0.953265	0.926485	0.0229036	0.0114518	0.0114518
25.0039	573.451	566.01	369.956	648.2		25.0039	548.451	541.01	344.956	623.2		25.0039	0.898358	0.940227	0.899029	0.960417	0.924508	0.0309275	0.0154637	0.0154637
25.0261	571.687	559.856	376.021	643.084		25.0261	546.687	534.856	351.021	618.084		25.0261	0.895469	0.929532	0.914836	0.952533	0.923092	0.0240793	0.0120396	0.0120396
25.0645	577.255	558.817	373.651	649.364		25.0645	552.255	533.817	348.651	624.364		25.0645	0.904589	0.927726	0.908659	0.962211	0.925796	0.026288	0.013144	0.013144
25.0903	578.053	556.634	373.742	641.653		25.0903	553.053	531.634	348.742	616.653		25.0903	0.905896	0.923932	0.908896	0.950328	0.922263	0.0203055	0.0101528	0.0101528
25.1287	571.964	561.621	374.959	632.073		25.1287	546.964	536.621	349.959	607.073		25.1287	0.895923	0.932599	0.912068	0.935564	0.919038	0.0186181	0.00930905	0.00930905
25.1508	577.458	559.586	368.417	641.384		25.1508	552.458	534.586	343.417	616.384		25.1508	0.904922	0.929062	0.895018	0.949913	0.919729	0.0246851	0.0123426	0.0123426
25.1892	569.242	563.094	373.231	645.341		25.1892	544.242	538.094	348.231	620.341		25.1892	0.891464	0.935159	0.907564	0.956011	0.92255	0.0286911	0.0143456	0.0143456
25.2169	571.273	560.8	374.03	628.049		25.2169	546.273	535.8	349.03	603.049		25.2169	0.894791	0.931172	0.909647	0.929362	0.916243	0.017308	0.00865401	0.00865401
25.2553	578.715	553.171	378.337	632.908		25.2553	553.715	528.171	353.337	607.908		25.2553	0.906981	0.917914	0.920872	0.936851	0.920654	0.0123402	0.00617012	0.00617012
25.2774	578.794	555.601	368.181	636.725		25.2774	553.794	530.601	343.181	611.725		25.2774	0.90711	0.922137	0.894403	0.942733	0.916596	0.0207874	0.0103937	0.0103937
25.3158	586.019	561.523	371.807	644.142		25.3158	561.019	536.523	346.807	619.142		25.3158	0.918945	0.932429	0.903853	0.954163	0.927347	0.0213503	0.0106751	0.0106751
25.3416	577.628	552.557	368.088	644.44		25.3416	552.628	527.557	343.088	619.44		25.3416	0.9052	0.916847	0.894161	0.954623	0.917708	0.0262955	0.0131477	0.0131477
25.38	571.444	560.327	363.56	640.458		25.38	546.444	535.327	338.56	615.458		25.38	0.895071	0.93035	0.88236	0.948486	0.914067	0.0306377	0.0153189	0.0153189
25.4021	569.216	555.517	366.544	635.088		25.4021	544.216	530.517	341.544	610.088		25.4021	0.891422	0.921991	0.890137	0.94021	0.91094	0.0244446	0.0122223	0.0122223
25.4405	571.878	558.915	367.744	641.516		25.4405	546.878	533.915	342.744	616.516		25.4405	0.895782	0.927896	0.893264	0.950116	0.916765	0.0272569	0.0136284	0.0136284
25.4663	562.6	554.724	375.059	633.118		25.4663	537.6	529.724	350.059	608.118		25.4663	0.880585	0.920613	0.912329	0.937174	0.912675	0.0237567	0.0118783	0.0118783
25.5048	572.471	550.343	367.631	641.179		25.5048	547.471	525.343	342.631	616.179		25.5048	0.896753	0.912999	0.89297	0.949597	0.91308	0.0258489	0.0129245	0.0129245
25.5269	568.646	556.344	378.474	639.115		25.5269	543.646	531.344	353.474	614.115		25.5269	0.890488	0.923428	0.921229	0.946416	0.92039	0.0229597	0.0114798	0.0114798
25.5653	569.863	554.539	363.598	647.902		25.5653	544.863	529.539	338.598	622.902		25.5653	0.892481	0.920291	0.882459	0.959958	0.913797	0.0346865	0.0173432	0.0173432
25.5911	573.053	566.436	377.782	645.969		25.5911	548.053	541.436	352.782	620.969		25.5911	0.897706	0.940967	0.919425	0.956979	0.928769	0.0257991	0.0128996	0.0128996
25.6295	569.503	562.906	372.668	635.231		25.6295	544.503	537.906	347.668	610.231		25.6295	0.891892	0.934832	0.906097	0.940431	0.918313	0.0231617	0.0115808	0.0115808
25.6516	569.926	550.891	372.377	638.175		25.6516	544.926	525.891	347.377	613.175		25.6516	0.892584	0.913951	0.905339	0.944968	0.91421	0.0223044	0.0111522	0.0111522
25.69	570.9	556.349	369.433	646.638		25.69	545.9	531.349	344.433	621.638		25.69	0.89418	0.923437	0.897666	0.95801	0.918323	0.0295003	0.0147502	0.0147502
25.7158	571.516	543.432	372.583	648.303		25.7158	546.516	518.432	347.583	623.303		25.7158	0.895189	0.900988	0.905876	0.960576	0.915657	0.0302628	0.0151314	0.0151314
25.7542	575.823	546.304	373.81	653.876		25.7542	550.823	521.304	348.81	628.876		25.7542	0.902244	0.905979	0.909073	0.969165	0.921615	0.0318223	0.0159111	0.0159111
25.7764	574.146	549.461	370.807	645.493		25.7764	549.146	524.461	345.807	620.493		25.7764	0.899497	0.911466	0.901247	0.956245	0.917114	0.0266164	0.0133082	0.0133082
25.8148	573.77	550.063	374.862	644.55		25.8148	548.77	525.063	349.862	619.55		25.8148	0.898881	0.912512	0.911815	0.954792	0.9195	0.0243487	0.0121743	0.0121743
25.8406	571.387	546.812	376.885	638.787		25.8406	546.387	521.812	351.885	613.787		25.8406	0.894978	0.906862	0.917087	0.945911	0.91621	0.0217647	0.0108823	0.0108823
25.879	575.145	553.846	364.269	642.712		25.879	550.145	528.846	339.269	617.712		25.879	0.901133	0.919087	0.884207	0.95196	0.914097	0.0289823	0.0144911	0.0144911
25.9011	569.953	554.5	373.785	633.877		25.9011	544.953	529.5	348.785	608.877		25.9011	0.892629	0.920223	0.909008	0.938344	0.915051	0.0192232	0.00961158	0.00961158
25.9395	568.368	560.397	373.808	645.066		25.9395	543.368	535.397	348.808	620.066		25.9395	0.890032	0.930472	0.909068	0.955587	0.92129	0.0282077	0.0141038	0.0141038
25.9653	572.313	550.364	370.918	647.463		25.9653	547.313	525.364	345.918	622.463		25.9653	0.896494	0.913035	0.901536	0.959281	0.917587	0.0286454	0.0143227	0.0143227
26.0037	575.393	562.404	371.613	656.271		26.0037	550.393	537.404	346.613	631.271		26.0037	0.901539	0.93396	0.903348	0.972855	0.927926	0.0334436	0.0167218	0.0167218
26.0258	578.204	552.029	376.052	641.212		26.0258	553.204	527.029	351.052	616.212		26.0258	0.906144	0.915929	0.914916	0.949648	0.921659	0.0191694	0.00958471	0.00958471
26.0642	568	553.52	371.98	649.786		26.0642	543	528.52	346.98	624.786		26.0642	0.88943	0.91852	0.904304	0.962861	0.918779	0.0316977	0.0158488	0.0158488
26.0919	573.928	551.934	372.588	644.737		26.0919	548.928	526.934	347.588	619.737		26.0919	0.89914	0.915764	0.905889	0.95508	0.918968	0.025024	0.012512	0.012512
26.1303	572.404	563.978	368.981	646.56		26.1303	547.404	538.978	343.981	621.56		26.1303	0.896643	0.936695	0.896488	0.95789	0.921929	0.0305386	0.0152693	0.0152693
26.1524	576.95	558.556	372.165	648.651		26.1524	551.95	533.556	347.165	623.651		26.1524	0.90409	0.927272	0.904786	0.961112	0.924315	0.0267907	0.0133953	0.0133953
26.1908	570.352	556.205	371.615	647.148		26.1908	545.352	531.205	346.615	622.148		26.1908	0.893282	0.923186	0.903353	0.958796	0.919654	0.0289008	0.0144504	0.0144504
26.2166	576.769	550.944	374.327	639.933		26.2166	551.769	525.944	349.327	614.933		26.2166	0.903793	0.914043	0.910421	0.947677	0.918984	0.019594	0.00979702	0.00979702
26.255	569.189	552.734	371.418	627.317		26.255	544.189	527.734	346.418	602.317		26.255	0.891377	0.917154	0.902839	0.928234	0.909901	0.0161422	0.00807111	0.00807111
26.2772	579.544	554.48	374.453	642.692		26.2772	554.544	529.48	349.453	617.692		26.2772	0.908339	0.920189	0.910749	0.951929	0.922801	0.0200803	0.0100402	0.0100402
26.3156	569.411	557.481	370.316	642.412		26.3156	544.411	532.481	345.316	617.412		26.3156	0.891741	0.925404	0.899967	0.951497	0.917152	0.0270107	0.0135053	0.0135053
26.3414	572.397	548.034	376.229	634.25		26.3414	547.397	523.034	351.229	609.25		26.3414	0.896632	0.908986	0.915378	0.938919	0.914979	0.0177558	0.00887789	0.00887789
26.3798	566.309	562.953	374.748	644.3		26.3798	541.309	537.953	349.748	619.3		26.3798	0.88666	0.934914	0.911518	0.954407	0.921875	0.0293014	0.0146507	0.0146507
26.4019	569.909	558.064	368.436	641.504		26.4019	544.909	533.064	343.436	616.504		26.4019	0.892557	0.926417	0.895068	0.950098	0.916035	0.0274405	0.0137202	0.0137202
26.4403	571.849	554.339	369.615	646.736		26.4403	546.849	529.339	344.615	621.736		26.4403	0.895734	0.919943	0.89814	0.958161	0.917995	0.0289071	0.0144535	0.0144535
26.4661	574.327	556.579	372.854	643.985		26.4661	549.327	531.579	347.854	618.985		26.4661	0.899793	0.923836	0.906582	0.953921	0.921033	0.0241486	0.0120743	0.0120743
26.5045	576.977	556.737	372.785	638.619		26.5045	551.977	531.737	347.785	613.619		26.5045	0.904134	0.924111	0.906402	0.945652	0.920075	0.0192487	0.00962433	0.00962433
26.5266	572.469	565.511	367.474	631.648		26.5266	547.469	540.511	342.474	606.648		26.5266	0.89675	0.939359	0.89256	0.934909	0.915895	0.0246519	0.0123259	0.0123259
26.5651	580.537	559.337	371.936	633.558		26.5651	555.537	534.337	346.936	608.558		26.5651	0.909965	0.92863	0.904189	0.937852	0.920159	0.0157454	0.00787268	0.00787268
26.5909	579.801	556.859	370.689	642.367		26.5909	554.801	531.859	345.689	617.367		26.5909	0.90876	0.924323	0.900939	0.951428	0.921362	0.0222758	0.0111379	0.0111379
26.6293	570.676	554.764	373.929	641.808		26.6293	545.676	529.764	348.929	616.808		26.6293	0.893813	0.920682	0.909383	0.950566	0.918611	0.0239828	0.0119914	0.0119914
26.6514	568.606	546.75	372.375	640.78		26.6514	543.606	521.75	347.375	615.78		26.6514	0.890422	0.906754	0.905333	0.948982	0.912873	0.0251806	0.0125903	0.0125903
26.6898	560.148	554.335	373.209	646.322		26.6898	535.148	529.335	348.209	621.322		26.6898	0.876568	0.919937	0.907507	0.957523	0.915384	0.033492	0.016746	0.016746
26.7156	570.401	561.447	375.336	636.276		26.7156	545.401	536.447	350.336	611.276		26.7156	0.893363	0.932297	0.91305	0.942041	0.920188	0.0215617	0.0107809	0.0107809
26.754	564.707	557.621	368.854	638.187		26.754	539.707	532.621	343.854	613.187		26.754	0.884036	0.925647	0.896157	0.944986	0.912707	0.0277208	0.0138604	0.0138604
26.7761	561.989	549.351	373.9	629.437		26.7761	536.989	524.351	348.9	604.437		26.7761	0.879584	0.911275	0.909308	0.931501	0.907917	0.021387	0.0106935	0.0106935
26.8145	563.296	559.883	370.861	643.843		26.8145	538.296	534.883	345.861	618.843		26.8145	0.881725	0.929578	0.901388	0.953703	0.916598	0.0315846	0.0157923	0.0157923
26.8403	569.053	560.05	375.676	633.179		26.8403	544.053	535.05	350.676	608.179		26.8403	0.891155	0.929869	0.913937	0.937268	0.918057	0.0204068	0.0102034	0.0102034
26.8788	571.078	551.818	375.321	634.008		26.8788	546.078	526.818	350.321	609.008		26.8788	0.894471	0.915562	0.913011	0.938546	0.915398	0.018069	0.0090345	0.0090345
26.9009	570.986	553.87	375.823	628.597		26.9009	545.986	528.87	350.823	603.597		26.9009	0.894321	0.919128	0.91432	0.930207	0.914494	0.015004	0.00750202	0.00750202
26.9393	569.581	552.276	367.891	642.73		26.9393	544.581	527.276	342.891	617.73		26.9393	0.892019	0.916358	0.893647	0.951987	0.913503	0.0279583	0.0139791	0.0139791
26.9651	573.679	556.268	375.856	638.299		26.9651	548.679	531.268	350.856	613.299		26.9651	0.898732	0.923296	0.914406	0.945159	0.920398	0.0193806	0.00969029	0.00969029
27.0035	571.024	552.298	371.848	635.491		27.0035	546.024	527.298	346.848	610.491		27.0035	0.894383	0.916396	0.90396	0.940831	0.913893	0.0200935	0.0100467	0.0100467
27.0256	570.517	552.91	368.723	638.727		27.0256	545.517	527.91	343.723	613.727		27.0256	0.893553	0.91746	0.895816	0.945818	0.913162	0.0242922	0.0121461	0.0121461
27.064	569.808	557.477	369.016	640.748		27.064	544.808	532.477	344.016	615.748		27.064	0.892391	0.925397	0.896579	0.948933	0.915825	0.0265035	0.0132517	0.0132517
27.0917	575.807	560.991	378.768	636.115		27.0917	550.807	535.991	353.768	611.115		27.0917	0.902218	0.931504	0.921995	0.941793	0.924377	0.0168407	0.00842035	0.00842035
27.1301	571.407	559.482	378.614	628.463		27.1301	546.407	534.482	353.614	603.463		27.1301	0.89501	0.928882	0.921594	0.93	0.918871	0.0163383	0.00816914	0.00816914
27.1522	570.097	558.612	364.618	652.79		27.1522	545.097	533.612	339.618	627.79		27.1522	0.892865	0.92737	0.885117	0.967491	0.918211	0.0376388	0.0188194	0.0188194
27.1906	567.998	545.677	377.333	644.242		27.1906	542.998	520.677	352.333	619.242		27.1906	0.889426	0.90489	0.918255	0.954318	0.916722	0.0276937	0.0138469	0.0138469
27.2164	571.064	555.493	374.044	640.457		27.2164	546.064	530.493	349.044	615.457		27.2164	0.894449	0.921949	0.909683	0.948484	0.918641	0.0228553	0.0114276	0.0114276
27.2548	571.714	554.394	367.974	641.282		27.2548	546.714	529.394	342.974	616.282		27.2548	0.895513	0.920039	0.893863	0.949756	0.914793	0.0262023	0.0131011	0.0131011
27.2769	575.737	553.434	364.779	624.925		27.2769	550.737	528.434	339.779	599.925		27.2769	0.902103	0.918371	0.885537	0.924548	0.90764	0.0175142	0.00875712	0.00875712
27.3153	570.293	558.253	371.62	637.017		27.3153	545.293	533.253	346.62	612.017		27.3153	0.893186	0.926746	0.903366	0.943183	0.91662	0.0226051	0.0113025	0.0113025
27.3412	565.979	558.823	366.13	625.845		27.3412	540.979	533.823	341.13	600.845		27.3412	0.886119	0.927736	0.889058	0.925966	0.90722	0.0227115	0.0113557	0.0113557
27.3796	569.714	555.418	370.888	639.21		27.3796	544.714	530.418	345.888	614.21		27.3796	0.892237	0.921819	0.901458	0.946563	0.915519	0.024105	0.0120525	0.0120525
27.4017	562.841	557.61	370.592	625.523		27.4017	537.841	532.61	345.592	600.523		27.4017	0.880979	0.925628	0.900687	0.92547	0.908191	0.0215978	0.0107989	0.0107989
27.4401	560.769	555.068	377.313	639.497		27.4401	535.769	530.068	352.313	614.497		27.4401	0.877585	0.92121	0.918203	0.947005	0.916001	0.0286879	0.014344	0.014344
27.4659	567.191	557.916	373.315	637.087		27.4659	542.191	532.916	348.315	612.087		27.4659	0.888105	0.92616	0.907783	0.943291	0.916335	0.0237574	0.0118787	0.0118787
27.5043	563.011	550.288	370.644	634.258		27.5043	538.011	525.288	345.644	609.258		27.5043	0.881258	0.912903	0.900822	0.938931	0.908479	0.0241283	0.0120642	0.0120642
27.5264	563.893	558.733	370.894	634.771		27.5264	538.893	533.733	345.894	609.771		27.5264	0.882702	0.92758	0.901474	0.939722	0.912869	0.0256733	0.0128366	0.0128366
27.5648	563.555	557.116	365	640.503		27.5648	538.555	532.116	340	615.503		27.5648	0.882149	0.92477	0.886113	0.948555	0.910397	0.0318869	0.0159434	0.0159434
27.5906	559.701	559.744	371.418	638.504		27.5906	534.701	534.744	346.418	613.504		27.5906	0.875836	0.929337	0.902839	0.945475	0.913372	0.0305797	0.0152898	0.0152898
27.629	569.858	554.468	371.892	637.109		27.629	544.858	529.468	346.892	612.109		27.629	0.892473	0.920168	0.904075	0.943325	0.91501	0.0220289	0.0110145	0.0110145
27.6512	570.031	559.289	374.583	640.966		27.6512	545.031	534.289	349.583	615.966		27.6512	0.892756	0.928546	0.911088	0.949269	0.920415	0.0241568	0.0120784	0.0120784
27.6896	557.939	555.117	368.675	638.021		27.6896	532.939	530.117	343.675	613.021		27.6896	0.87295	0.921296	0.89569	0.94473	0.908667	0.0311135	0.0155567	0.0155567
27.7154	569.854	558.363	368.753	643.56		27.7154	544.854	533.363	343.753	618.56		27.7154	0.892467	0.926937	0.895894	0.953266	0.917141	0.0286431	0.0143216	0.0143216
27.7538	566.506	558.844	370.466	636.281		27.7538	541.506	533.844	345.466	611.281		27.7538	0.886983	0.927773	0.900358	0.942049	0.914291	0.0251139	0.012557	0.012557
27.7759	553.562	552.475	369.384	634.41		27.7759	528.562	527.475	344.384	609.41		27.7759	0.86578	0.916704	0.897538	0.939165	0.904797	0.0310803	0.0155401	0.0155401
27.7984	566.424	546.495	365.393	630.335		27.7984	541.424	521.495	340.393	605.335		27.7984	0.886848	0.906311	0.887137	0.932885	0.903295	0.0217276	0.0108638	0.0108638
27.8368	561.641	554.288	362.319	640.964		27.8368	536.641	529.288	337.319	615.964		27.8368	0.879014	0.919855	0.879125	0.949266	0.906815	0.0342137	0.0171069	0.0171069
27.859	566.611	547.803	369.1	633.712		27.859	541.611	522.803	344.1	608.712		27.859	0.887155	0.908584	0.896798	0.93809	0.907657	0.0221003	0.0110502	0.0110502
27.8974	562.425	553.14	361.331	638.289		27.8974	537.425	528.14	336.331	613.289		27.8974	0.880298	0.91786	0.87655	0.945143	0.904963	0.0326416	0.0163208	0.0163208
27.9195	570.111	553.383	376.311	642.382		27.9195	545.111	528.383	351.311	617.382		27.9195	0.892888	0.918282	0.915591	0.951451	0.919553	0.0241236	0.0120618	0.0120618
27.9579	572.005	557.154	372.901	640.118		27.9579	547.005	532.154	347.901	615.118		27.9579	0.89599	0.924836	0.906704	0.947962	0.918873	0.0227555	0.0113777	0.0113777
27.98	563.94	555.763	375.424	644.95		27.98	538.94	530.763	350.424	619.95		27.98	0.882779	0.922418	0.91328	0.955409	0.918472	0.0298932	0.0149466	0.0149466
28.0184	580.527	560.176	372.454	631.458		28.0184	555.527	535.176	347.454	606.458		28.0184	0.909949	0.930088	0.905539	0.934616	0.920048	0.0144397	0.00721986	0.00721986
28.0405	571.7	553.231	370.866	634.76		28.0405	546.7	528.231	345.866	609.76		28.0405	0.89549	0.918018	0.901401	0.939705	0.913653	0.0198137	0.00990686	0.00990686
28.0789	573.874	559.438	374.375	638.573		28.0789	548.874	534.438	349.375	613.573		28.0789	0.899051	0.928805	0.910546	0.945581	0.920996	0.0204628	0.0102314	0.0102314
28.1011	578.235	545.129	378.087	637.337		28.1011	553.235	520.129	353.087	612.337		28.1011	0.906195	0.903937	0.92022	0.943676	0.918507	0.0182601	0.00913005	0.00913005
28.1395	572.652	556.355	375.074	628.761		28.1395	547.652	531.355	350.074	603.761		28.1395	0.89705	0.923447	0.912368	0.93046	0.915831	0.0145687	0.00728433	0.00728433
28.1653	565.64	552.592	374.887	634.158		28.1653	540.64	527.592	349.887	609.158		28.1653	0.885564	0.916907	0.91188	0.938777	0.913282	0.0218585	0.0109293	0.0109293
28.2037	569.661	556.096	368.733	630.737		28.2037	544.661	531.096	343.733	605.737		28.2037	0.89215	0.922997	0.895842	0.933505	0.911123	0.020293	0.0101465	0.0101465
28.2258	574.628	556.039	370.216	638.728		28.2258	549.628	531.039	345.216	613.728		28.2258	0.900286	0.922898	0.899707	0.94582	0.917178	0.0219367	0.0109683	0.0109683
28.2642	572.693	549.578	373.389	633.978		28.2642	547.693	524.578	348.389	608.978		28.2642	0.897117	0.911669	0.907976	0.9385	0.913815	0.017577	0.00878851	0.00878851
28.2919	566.438	548.01	374.674	634.091		28.2919	541.438	523.01	349.674	609.091		28.2919	0.886871	0.908944	0.911325	0.938674	0.911454	0.0212253	0.0106127	0.0106127
28.3303	578.739	549.911	366.737	643.42		28.3303	553.739	524.911	341.737	618.42		28.3303	0.90702	0.912248	0.89064	0.953051	0.91574	0.0265226	0.0132613	0.0132613
28.3524	583.016	548.21	376.018	628.763		28.3524	558.016	523.21	351.018	603.763		28.3524	0.914026	0.909292	0.914828	0.930463	0.917152	0.00920385	0.00460192	0.00460192
28.3908	579.317	563.928	370.084	632.755		28.3908	554.317	538.928	345.084	607.755		28.3908	0.907967	0.936608	0.899363	0.936615	0.920138	0.0193435	0.00967174	0.00967174
28.4166	569.882	547.921	379.415	635.419		28.4166	544.882	522.921	354.415	610.419		28.4166	0.892512	0.90879	0.923681	0.94072	0.916426	0.0205996	0.0102998	0.0102998
28.455	575.159	554.789	366.233	630.458		28.455	550.159	529.789	341.233	605.458		28.455	0.901156	0.920726	0.889326	0.933075	0.911071	0.0195664	0.00978319	0.00978319
28.4771	576.154	549.574	372.97	641.899		28.4771	551.154	524.574	347.97	616.899		28.4771	0.902786	0.911662	0.906884	0.950707	0.91801	0.0220977	0.0110489	0.0110489
28.5155	575.064	551.109	373.299	624.857		28.5155	550.064	526.109	348.299	599.857		28.5155	0.901	0.91433	0.907742	0.924443	0.911879	0.00998877	0.00499438	0.00499438
28.5413	579.277	555.799	381.669	639.933		28.5413	554.277	530.799	356.669	614.933		28.5413	0.907901	0.922481	0.929556	0.947677	0.926904	0.0165248	0.00826241	0.00826241
28.5798	582.818	556.257	372.577	635.96		28.5798	557.818	531.257	347.577	610.96		28.5798	0.913701	0.923277	0.90586	0.941554	0.921098	0.0153851	0.00769256	0.00769256
28.6019	583.403	558.75	371.072	637.783		28.6019	558.403	533.75	346.072	612.783		28.6019	0.91466	0.927609	0.901938	0.944364	0.922143	0.0181466	0.00907328	0.00907328
28.6403	580.674	551.178	364.54	634.6		28.6403	555.674	526.178	339.54	609.6		28.6403	0.91019	0.91445	0.884914	0.939458	0.912253	0.0223356	0.0111678	0.0111678
28.6661	579.219	555.196	368.54	641.334		28.6661	554.219	530.196	343.54	616.334		28.6661	0.907806	0.921433	0.895339	0.949836	0.918603	0.0233902	0.0116951	0.0116951
28.7045	580.634	554.348	372.376	635.032		28.7045	555.634	529.348	347.376	610.032		28.7045	0.910124	0.919959	0.905336	0.940124	0.918886	0.0154118	0.00770591	0.00770591
28.7266	576.119	563.802	368.008	635.458		28.7266	551.119	538.802	343.008	610.458		28.7266	0.902729	0.936389	0.893952	0.94078	0.918463	0.0235781	0.011789	0.011789
28.765	575.438	551.162	371.379	623.222		28.765	550.438	526.162	346.379	598.222		28.765	0.901613	0.914422	0.902738	0.921923	0.910174	0.00974141	0.0048707	0.0048707
28.7908	573.965	551.668	374.374	634.696		28.7908	548.965	526.668	349.374	609.696		28.7908	0.8992	0.915302	0.910543	0.939606	0.916163	0.0170258	0.00851291	0.00851291
28.8292	575.452	558.036	365.762	616.753		28.8292	550.452	533.036	340.762	591.753		28.8292	0.901636	0.926369	0.888099	0.911954	0.907014	0.0161835	0.00809176	0.00809176
28.8514	574.296	560.101	372.483	629.208		28.8514	549.296	535.101	347.483	604.208		28.8514	0.899743	0.929957	0.905615	0.931149	0.916616	0.016278	0.00813902	0.00813902
28.8898	574.422	559.945	383.823	622.163		28.8898	549.422	534.945	358.823	597.163		28.8898	0.899949	0.929686	0.935169	0.920291	0.921274	0.0154873	0.00774367	0.00774367
28.9156	568.434	552.665	385.337	630.78		28.9156	543.434	527.665	360.337	605.78		28.9156	0.890141	0.917034	0.939115	0.933571	0.919965	0.0219844	0.0109922	0.0109922
28.954	572.834	558.369	373.891	629.398		28.954	547.834	533.369	348.891	604.398		28.954	0.897348	0.926947	0.909284	0.931441	0.916255	0.0158221	0.00791107	0.00791107
28.9761	580	556.546	376.594	637.437		28.9761	555	531.546	351.594	612.437		28.9761	0.909086	0.923779	0.916329	0.94383	0.923256	0.0149706	0.0074853	0.0074853
29.0145	570.395	560.162	378.771	634.754		29.0145	545.395	535.162	353.771	609.754		29.0145	0.893353	0.930063	0.922003	0.939695	0.921279	0.0199728	0.00998638	0.00998638
29.0403	570.179	551.485	379.618	639.256		29.0403	545.179	526.485	354.618	614.256		29.0403	0.892999	0.914983	0.92421	0.946634	0.919707	0.0222183	0.0111091	0.0111091
29.0787	565.455	559.368	367.839	632.541		29.0787	540.455	534.368	342.839	607.541		29.0787	0.885261	0.928683	0.893512	0.936285	0.910935	0.0253006	0.0126503	0.0126503
29.1008	575.383	550.882	374.974	645.484		29.1008	550.383	525.882	349.974	620.484		29.1008	0.901523	0.913936	0.912107	0.956232	0.920949	0.0241495	0.0120748	0.0120748
29.1393	580.25	544.769	368.308	642.938		29.1393	555.25	519.769	343.308	617.938		29.1393	0.909495	0.903312	0.894734	0.952308	0.914962	0.0256223	0.0128112	0.0128112
29.1669	571.313	557.296	379.148	633.324		29.1669	546.313	532.296	354.148	608.324		29.1669	0.894856	0.925082	0.922985	0.937492	0.920104	0.018008	0.00900399	0.00900399
29.2053	571.826	560.945	371.24	624.978		29.2053	546.826	535.945	346.24	599.978		29.2053	0.895697	0.931424	0.902375	0.92463	0.913531	0.0171839	0.00859193	0.00859193
29.2274	570.255	556.501	369.021	634.981		29.2274	545.255	531.501	344.021	609.981		29.2274	0.893123	0.923701	0.896592	0.940045	0.913365	0.022433	0.0112165	0.0112165
29.2658	583.883	554.369	373.456	632.814		29.2658	558.883	529.369	348.456	607.814		29.2658	0.915446	0.919996	0.908151	0.936706	0.920075	0.0121134	0.0060567	0.0060567
29.2916	569.045	552.482	374.429	640.391		29.2916	544.045	527.482	349.429	615.391		29.2916	0.891141	0.916716	0.910687	0.948383	0.916732	0.0237571	0.0118785	0.0118785
29.33	581.496	554.637	375.404	640.218		29.33	556.496	529.637	350.404	615.218		29.33	0.911536	0.920461	0.913228	0.948116	0.923335	0.016968	0.00848398	0.00848398
29.3522	572.653	544.185	367.728	627.617		29.3522	547.653	519.185	342.728	602.617		29.3522	0.897051	0.902297	0.893222	0.928697	0.905317	0.0160243	0.00801213	0.00801213
29.3906	580.673	571.346	371.861	625.276		29.3906	555.673	546.346	346.861	600.276		29.3906	0.910188	0.9495	0.903994	0.925089	0.922193	0.0202435	0.0101217	0.0101217
29.4164	569.211	566.374	374.97	640.25		29.4164	544.211	541.374	349.97	615.25		29.4164	0.891413	0.940859	0.912097	0.948165	0.923134	0.0262601	0.0131301	0.0131301
29.4548	574.296	553.216	372.779	629.112		29.4548	549.296	528.216	347.779	604.112		29.4548	0.899743	0.917992	0.906386	0.931001	0.91378	0.0137357	0.00686783	0.00686783
29.4769	576.924	560.519	373.52	634.486		29.4769	551.924	535.519	348.52	609.486		29.4769	0.904047	0.930684	0.908318	0.939282	0.920583	0.0170838	0.00854191	0.00854191
29.5153	574.82	559.642	372.384	644.531		29.5153	549.82	534.642	347.384	619.531		29.5153	0.900601	0.92916	0.905357	0.954763	0.92247	0.0248911	0.0124456	0.0124456
29.5411	572.756	553.715	376.471	622.91		29.5411	547.756	528.715	351.471	597.91		29.5411	0.89722	0.918859	0.916008	0.921443	0.913383	0.0110012	0.00550061	0.00550061
29.5795	577.202	557.374	367.08	639.639		29.5795	552.202	532.374	342.08	614.639		29.5795	0.904503	0.925218	0.891534	0.947224	0.917119	0.0243973	0.0121987	0.0121987
29.6016	584.023	566.328	369.462	630.115		29.6016	559.023	541.328	344.462	605.115		29.6016	0.915675	0.940779	0.897742	0.932546	0.921686	0.0190785	0.00953924	0.00953924
29.6401	574.918	559.82	372.683	631.389		29.6401	549.918	534.82	347.683	606.389		29.6401	0.900761	0.929469	0.906136	0.93451	0.917719	0.0167503	0.00837513	0.00837513
29.6659	572.891	559.98	373.9	636.555		29.6659	547.891	534.98	348.9	611.555		29.6659	0.897441	0.929747	0.909308	0.942471	0.919742	0.02019	0.010095	0.010095
29.7043	586.706	557.923	369.622	635.533		29.7043	561.706	532.923	344.622	610.533		29.7043	0.92007	0.926172	0.898159	0.940896	0.921324	0.0177462	0.00887309	0.00887309
29.7264	580.115	554.154	379.25	644.658		29.7264	555.115	529.154	354.25	619.658		29.7264	0.909274	0.919622	0.923251	0.954959	0.926776	0.0196993	0.00984964	0.00984964
29.7648	576.849	559.179	370.53	640.071		29.7648	551.849	534.179	345.53	615.071		29.7648	0.903924	0.928355	0.900525	0.94789	0.920173	0.0222502	0.0111251	0.0111251
29.7906	579.297	555.721	372.184	637.62		29.7906	554.297	530.721	347.184	612.62		29.7906	0.907934	0.922345	0.904836	0.944112	0.919807	0.0179099	0.00895497	0.00895497
29.829	580.649	563.583	369.419	627.248		29.829	555.649	538.583	344.419	602.248		29.829	0.910149	0.936009	0.897629	0.928128	0.917979	0.0173541	0.00867703	0.00867703
29.8511	580.895	555.847	371.767	629.309		29.8511	555.895	530.847	346.767	604.309		29.8511	0.910552	0.922564	0.903749	0.931304	0.917042	0.0122846	0.00614232	0.00614232
29.8895	579.54	561.885	373.397	624.861		29.8895	554.54	536.885	348.397	599.861		29.8895	0.908332	0.933058	0.907997	0.924449	0.918459	0.0123964	0.00619822	0.00619822
29.9153	580.88	560.436	373.762	639.199		29.9153	555.88	535.436	348.762	614.199		29.9153	0.910527	0.93054	0.908948	0.946546	0.92414	0.0178799	0.00893994	0.00893994
29.9538	577.761	557.068	372.98	634.176		29.9538	552.761	532.068	347.98	609.176		29.9538	0.905418	0.924686	0.90691	0.938805	0.918955	0.0158659	0.00793296	0.00793296
29.9759	567.849	560.872	364.584	633.889		29.9759	542.849	535.872	339.584	608.889		29.9759	0.889182	0.931297	0.885028	0.938362	0.910968	0.0277561	0.0138781	0.0138781
30.0143	585.29	552.087	370.903	632.924		30.0143	560.29	527.087	345.903	607.924		30.0143	0.917751	0.91603	0.901497	0.936875	0.918038	0.0145208	0.0072604	0.0072604
30.0401	575.398	557.638	373.079	628.716		30.0401	550.398	532.638	348.079	603.716		30.0401	0.901548	0.925677	0.907168	0.93039	0.916196	0.0139934	0.00699668	0.00699668
30.0785	581.937	560.918	371.762	625.989		30.0785	556.937	535.918	346.762	600.989		30.0785	0.912258	0.931377	0.903736	0.926188	0.91839	0.012673	0.00633648	0.00633648
30.1006	579.386	558.006	372.85	631.836		30.1006	554.386	533.006	347.85	606.836		30.1006	0.90808	0.926316	0.906571	0.935199	0.919042	0.0140195	0.00700973	0.00700973
30.139	572.991	552.324	379.51	641.233		30.139	547.991	527.324	354.51	616.233		30.139	0.897605	0.916442	0.923929	0.94968	0.921914	0.0215709	0.0107854	0.0107854
30.1667	578.714	566.858	373.794	638.017		30.1667	553.714	541.858	348.794	613.017		30.1667	0.906979	0.9417	0.909032	0.944724	0.925609	0.0203814	0.0101907	0.0101907
30.191	573.682	559.538	372.714	642.489		30.191	548.682	534.538	347.714	617.489		30.191	0.898737	0.928979	0.906217	0.951616	0.921387	0.0239067	0.0119533	0.0119533
30.2294	584.693	568.556	374.375	636.246		30.2294	559.693	543.556	349.375	611.246		30.2294	0.916773	0.944651	0.910546	0.941995	0.928491	0.017348	0.00867399	0.00867399
30.2516	579.891	562.4	375.422	634.184		30.2516	554.891	537.4	350.422	609.184		30.2516	0.908907	0.933953	0.913275	0.938817	0.923738	0.0148454	0.00742271	0.00742271
30.29	574.333	565.442	368.293	641.616		30.29	549.333	540.442	343.293	616.616		30.29	0.899803	0.939239	0.894695	0.950271	0.921002	0.027873	0.0139365	0.0139365
30.3158	569.792	549.286	368.299	637.499		30.3158	544.792	524.286	343.299	612.499		30.3158	0.892365	0.911162	0.894711	0.943926	0.910541	0.0237761	0.011888	0.011888
30.3542	579.486	562.786	383.312	639.517		30.3542	554.486	537.786	358.312	614.517		30.3542	0.908244	0.934624	0.933838	0.947036	0.930935	0.0162907	0.00814536	0.00814536
30.3763	579.052	549.66	377.095	626.01		30.3763	554.052	524.66	352.095	601.01		30.3763	0.907533	0.911812	0.917635	0.92622	0.9158	0.00808696	0.00404348	0.00404348
30.4147	575.705	550.562	377.175	640.732		30.4147	550.705	525.562	352.175	615.732		30.4147	0.90205	0.913379	0.917843	0.948908	0.920545	0.020043	0.0100215	0.0100215
30.4405	581.869	553.494	375.267	634.202		30.4405	556.869	528.494	350.267	609.202		30.4405	0.912147	0.918475	0.912871	0.938845	0.920584	0.0124978	0.00624889	0.00624889
30.4789	578.699	559.941	377.865	631.05		30.4789	553.699	534.941	352.865	606.05		30.4789	0.906955	0.929679	0.919642	0.933987	0.922566	0.0120182	0.0060091	0.0060091
30.501	574.108	556.065	377.924	643.085		30.501	549.108	531.065	352.924	618.085		30.501	0.899435	0.922943	0.919795	0.952534	0.923677	0.0218789	0.0109394	0.0109394
30.5395	578.021	553.987	371.129	643.769		30.5395	553.021	528.987	346.129	618.769		30.5395	0.905844	0.919332	0.902086	0.953589	0.920213	0.0234504	0.0117252	0.0117252
30.5653	577.823	550.426	376.963	633.764		30.5653	552.823	525.426	351.963	608.764		30.5653	0.90552	0.913143	0.917291	0.93817	0.918531	0.0139707	0.00698537	0.00698537
30.6037	570.917	554.587	372.867	629.509		30.6037	545.917	529.587	347.867	604.509		30.6037	0.894208	0.920374	0.906616	0.931612	0.913203	0.0162742	0.0081371	0.0081371
30.6258	579.284	552.588	370.051	648.08		30.6258	554.284	527.588	345.051	623.08		30.6258	0.907913	0.9169	0.899277	0.960232	0.921081	0.0270748	0.0135374	0.0135374
30.6642	575.764	555.439	373.34	637.425		30.6642	550.764	530.439	348.34	612.425		30.6642	0.902147	0.921855	0.907848	0.943812	0.918916	0.0185484	0.00927419	0.00927419
30.6918	577.257	553.888	369.639	639.303		30.6918	552.257	528.888	344.639	614.303		30.6918	0.904593	0.91916	0.898203	0.946706	0.917165	0.0215583	0.0107791	0.0107791
30.7162	578.872	552.521	374.581	643.585		30.7162	553.872	527.521	349.581	618.585		30.7162	0.907238	0.916784	0.911083	0.953305	0.922102	0.0211682	0.0105841	0.0105841
30.7546	579.017	563.709	375.611	647.771		30.7546	554.017	538.709	350.611	622.771		30.7546	0.907475	0.936228	0.913767	0.959756	0.929307	0.0237567	0.0118784	0.0118784
30.7767	584.503	556.212	371.689	637.928		30.7767	559.503	531.212	346.689	612.928		30.7767	0.916461	0.923199	0.903546	0.944587	0.921948	0.0171546	0.00857728	0.00857728
30.8152	573.564	559.195	379.778	631.701		30.8152	548.564	534.195	354.778	606.701		30.8152	0.898543	0.928383	0.924627	0.93499	0.921636	0.0159799	0.00798996	0.00798996
30.841	578.126	557.837	371.984	636.89		30.841	553.126	532.837	346.984	611.89		30.841	0.906016	0.926023	0.904314	0.942987	0.919835	0.0183137	0.00915683	0.00915683
30.8794	586.111	552.436	377.11	635.414		30.8794	561.111	527.436	352.11	610.414		30.8794	0.919095	0.916636	0.917674	0.940713	0.92353	0.0114997	0.00574983	0.00574983
30.9015	576.335	565.692	374.155	636.468		30.9015	551.335	540.692	349.155	611.468		30.9015	0.903082	0.939674	0.909972	0.942337	0.923766	0.020133	0.0100665	0.0100665
30.9399	579.155	564.117	369.971	641.803		30.9399	554.155	539.117	344.971	616.803		30.9399	0.907702	0.936937	0.899068	0.950559	0.923566	0.0242158	0.0121079	0.0121079
30.9657	574.321	563.055	372.105	635.899		30.9657	549.321	538.055	347.105	610.899		30.9657	0.899783	0.935091	0.90463	0.94146	0.920241	0.0210792	0.0105396	0.0105396
31.0041	571.77	573.921	369.389	641.862		31.0041	546.77	548.921	344.389	616.862		31.0041	0.895605	0.953975	0.897551	0.95065	0.924445	0.0322167	0.0161083	0.0161083
31.0262	576.177	572.986	371.033	623.46		31.0262	551.177	547.986	346.033	598.46		31.0262	0.902824	0.95235	0.901836	0.92229	0.919825	0.0236406	0.0118203	0.0118203
31.0646	572.292	563.753	374.813	632.77		31.0646	547.292	538.753	349.813	607.77		31.0646	0.89646	0.936304	0.911687	0.936638	0.920272	0.0197111	0.00985555	0.00985555
31.0904	566.439	565.802	374.201	640.552		31.0904	541.439	540.802	349.201	615.552		31.0904	0.886873	0.939865	0.910092	0.948631	0.921365	0.0282988	0.0141494	0.0141494
31.1288	571.553	564.956	372.95	627.439		31.1288	546.553	539.956	347.95	602.439		31.1288	0.895249	0.938395	0.906832	0.928422	0.917225	0.0197018	0.00985089	0.00985089
31.151	571.932	568.071	368.928	648.31		31.151	546.932	543.071	343.928	623.31		31.151	0.89587	0.943808	0.89635	0.960587	0.924154	0.0330993	0.0165496	0.0165496
31.1894	571.443	554.464	377.232	640.199		31.1894	546.443	529.464	352.232	615.199		31.1894	0.895069	0.920161	0.917992	0.948087	0.920327	0.0217105	0.0108553	0.0108553
31.2152	580.971	559.171	377.959	633.549		31.2152	555.971	534.171	352.959	608.549		31.2152	0.910676	0.928341	0.919887	0.937838	0.924186	0.011614	0.00580701	0.00580701

## Sheet: MRC5 XAB2-GFP DRB 3h
													average pre bleach													0
background	22													514.358	530.191	563.228	454.307	573.411	533.73	405.939	576.388	497.95	478.978	480.401
temps	1	2	3	4	5	6	7	8	9	10	11		temps	1	2	3	4	5	6	7	8	9	10	11		temps	1	2	3	4	5	6	7	8	9	10	11	moyenne	ecart	SEM	SEM
0	583.207	595.253	637.757	506.832	636.176	600.561	454.759	640.795	554.536	548.233	530.2		0	561.207	573.253	615.757	484.832	614.176	578.561	432.759	618.795	532.536	526.233	508.2		0	1.09108	1.08122	1.09326	1.06719	1.07109	1.084	1.06607	1.07357	1.06946	1.09866	1.05787	1.07759	0.0129622	0.00390826	0.00390826
0.028052	561.427	584.139	623.275	501.251	617.905	586.027	451.384	639.196	550.739	532.362	531.201		0.028052	539.427	562.139	601.275	479.251	595.905	564.027	429.384	617.196	528.739	510.362	509.201		0.028052	1.04874	1.06026	1.06755	1.05491	1.03923	1.05677	1.05776	1.0708	1.06183	1.06552	1.05995	1.05848	0.00884273	0.00266618
0.0664627	560.604	585.395	619.564	503.328	630.325	583.119	450.52	633.253	540.736	534.164	530.685		0.0664627	538.604	563.395	597.564	481.328	608.325	561.119	428.52	611.253	518.736	512.164	508.685		0.0664627	1.04714	1.06263	1.06096	1.05948	1.06089	1.05132	1.05563	1.06049	1.04174	1.06928	1.05888	1.05713	0.00774114	0.00233404
0.0885796	571.366	580.533	607.855	493.574	619.631	582.83	446.91	629.952	532.361	522.111	532.405		0.0885796	549.366	558.533	585.855	471.574	597.631	560.83	424.91	607.952	510.361	500.111	510.405		0.0885796	1.06806	1.05346	1.04017	1.03801	1.04224	1.05078	1.04673	1.05476	1.02492	1.04412	1.06246	1.04779	0.0119904	0.00361524
0.12699	560.683	577.003	617.28	490.231	624.009	578.938	443.968	622.677	540.103	518.022	522.146		0.12699	538.683	555.003	595.28	468.231	602.009	556.938	421.968	600.677	518.103	496.022	500.146		0.12699	1.04729	1.0468	1.05691	1.03065	1.04987	1.04348	1.03949	1.04214	1.04047	1.03558	1.0411	1.04307	0.00710165	0.00214123	0.00214123
0.152794	556.85	570.738	608.37	494.891	617.251	570.944	454.086	623.474	544.508	517.719	521.268		0.152794	534.85	548.738	586.37	472.891	595.251	548.944	432.086	601.474	522.508	495.719	499.268		0.152794	1.03984	1.03498	1.04109	1.04091	1.03809	1.02851	1.06441	1.04352	1.04932	1.03495	1.03927	1.04135	0.00929517	0.0028026
0.191204	549.132	560.363	605.055	493.151	599.87	572.379	440.821	630.744	532.355	517.668	522.915		0.191204	527.132	538.363	583.055	471.151	577.87	550.379	418.821	608.744	510.355	495.668	500.915		0.191204	1.02484	1.01541	1.0352	1.03708	1.00778	1.03119	1.03173	1.05614	1.02491	1.03484	1.0427	1.03108	0.0130228	0.00392653
0.213321	550.91	558.955	612.029	482.258	612.76	567.352	426.765	617.683	545.403	520.291	525.964		0.213321	528.91	536.955	590.029	460.258	590.76	545.352	404.765	595.683	523.403	498.291	503.964		0.213321	1.02829	1.01276	1.04758	1.0131	1.03026	1.02178	0.997108	1.03348	1.05111	1.04032	1.04905	1.02953	0.0172323	0.00519572
0.251732	545.117	567.89	615.21	477.124	596.16	565.421	438.727	607.876	524.797	518.495	507.974		0.251732	523.117	545.89	593.21	455.124	574.16	543.421	416.727	585.876	502.797	496.495	485.974		0.251732	1.01703	1.02961	1.05323	1.0018	1.00131	1.01816	1.02658	1.01646	1.00973	1.03657	1.0116	1.02019	0.0154779	0.00466676	0.00466676
0.277535	554.618	567.379	606.175	481.14	618.676	570.302	446.558	610.052	530.438	502.007	512.133		0.277535	532.618	545.379	584.175	459.14	596.676	548.302	424.558	588.052	508.438	480.007	490.133		0.277535	1.0355	1.02865	1.03719	1.01064	1.04057	1.0273	1.04587	1.02024	1.02106	1.00215	1.02026	1.02631	0.0131366	0.00396083
0.315946	556.96	570.343	604.599	498.92	599.894	563.545	439.916	611.01	530.811	511.806	504.121		0.315946	534.96	548.343	582.599	476.92	577.894	541.545	417.916	589.01	508.811	489.806	482.121		0.315946	1.04005	1.03424	1.03439	1.04977	1.00782	1.01464	1.0295	1.0219	1.02181	1.02261	1.00358	1.02548	0.0138509	0.00417621
0.338063	544.36	566.172	597.252	488.83	599.075	563.015	428.939	607.54	527.37	508.64	513.984		0.338063	522.36	544.172	575.252	466.83	577.075	541.015	406.939	585.54	505.37	486.64	491.984		0.338063	1.01556	1.02637	1.02135	1.02757	1.00639	1.01365	1.00246	1.01588	1.0149	1.016	1.02411	1.01675	0.00782347	0.00235887
0.376474	542.707	560.276	602.005	474.05	595.946	568.408	432.996	608.414	531.05	496.56	509.617		0.376474	520.707	538.276	580.005	452.05	573.946	546.408	410.996	586.414	509.05	474.56	487.617		0.376474	1.01234	1.01525	1.02979	0.995032	1.00093	1.02375	1.01246	1.01739	1.02229	0.990776	1.01502	1.01228	0.0121226	0.00365509	0.00365509
0.402277	537.411	568.666	602.889	503.944	596.166	576.494	439.872	597.333	536.071	499.937	510.85		0.402277	515.411	546.666	580.889	481.944	574.166	554.494	417.872	575.333	514.071	477.937	488.85		0.402277	1.00205	1.03107	1.03136	1.06083	1.00132	1.0389	1.0294	0.998169	1.03237	0.997826	1.01759	1.0219	0.0203064	0.00612262
0.440688	543.258	566.268	603.762	501.586	599.494	555.284	427.649	609.013	536.383	507.804	515.373		0.440688	521.258	544.268	581.762	479.586	577.494	533.284	405.649	587.013	514.383	485.804	493.373		0.440688	1.01342	1.02655	1.03291	1.05564	1.00712	0.999165	0.999286	1.01843	1.033	1.01425	1.027	1.02062	0.0167384	0.0050468
0.462804	544.501	561.474	588.381	488.371	612.563	548.281	442.144	603.213	526.747	509.793	511.276		0.462804	522.501	539.474	566.381	466.371	590.563	526.281	420.144	581.213	504.747	487.793	489.276		0.462804	1.01583	1.01751	1.0056	1.02655	1.02991	0.986044	1.03499	1.00837	1.01365	1.0184	1.01848	1.01594	0.0132256	0.00398768
0.501215	547.73	563.058	594.922	492.966	601.823	566.202	438.354	604.594	532.876	499.396	502.87		0.501215	525.73	541.058	572.922	470.966	579.823	544.202	416.354	582.594	510.876	477.396	480.87		0.501215	1.02211	1.0205	1.01721	1.03667	1.01118	1.01962	1.02566	1.01077	1.02596	0.996697	1.00098	1.01703	0.011528	0.00347584	0.00347584
0.528862	542.689	566.349	585.998	491.538	605.27	561.954	419.848	606.504	527.63	508.279	511.155		0.528862	520.689	544.349	563.998	469.538	583.27	539.954	397.848	584.504	505.63	486.279	489.155		0.528862	1.01231	1.0267	1.00137	1.03353	1.01719	1.01166	0.980069	1.01408	1.01542	1.01524	1.01822	1.01325	0.0137382	0.00414223
0.567272	547.933	562.376	586.46	483.626	595.639	555.297	426.014	598.543	524.488	508.915	508.047		0.567272	525.933	540.376	564.46	461.626	573.639	533.297	404.014	576.543	502.488	486.915	486.047		0.567272	1.0225	1.01921	1.00219	1.01611	1.0004	0.999189	0.995258	1.00027	1.00911	1.01657	1.01175	1.00841	0.00938119	0.00282854
0.589389	550.241	553.893	589.74	484.744	598.256	566.456	427.34	609.096	533.143	502.657	509.213		0.589389	528.241	531.893	567.74	462.744	576.256	544.456	405.34	587.096	511.143	480.657	487.213		0.589389	1.02699	1.00321	1.00801	1.01857	1.00496	1.0201	0.998525	1.01858	1.02649	1.00351	1.01418	1.01301	0.0098832	0.0029799
0.6278	543.107	558.933	588.504	488.335	597.718	552.546	429.847	603.86	521.025	502.187	512.651		0.6278	521.107	536.933	566.504	466.335	575.718	530.546	407.847	581.86	499.025	480.187	490.651		0.6278	1.01312	1.01272	1.00582	1.02648	1.00402	0.994035	1.0047	1.00949	1.00216	1.00252	1.02134	1.00876	0.0092419	0.00278654	0.00278654
0.653603	524.395	560.199	586.021	484.199	597.868	556.894	427.712	613.194	512.539	505.258	506.001		0.653603	502.395	538.199	564.021	462.199	575.868	534.894	405.712	591.194	490.539	483.258	484.001		0.653603	0.976743	1.0151	1.00141	1.01737	1.00429	1.00218	0.999441	1.02569	0.985116	1.00894	1.00749	1.00398	0.0139264	0.00419896
0.692014	531.469	558.924	588.069	477.005	596.108	551.684	429.182	603.418	508.559	514.992	506.277		0.692014	509.469	536.924	566.069	455.005	574.108	529.684	407.182	581.418	486.559	492.992	484.277		0.692014	0.990496	1.0127	1.00504	1.00154	1.00122	0.99242	1.00306	1.00873	0.977124	1.02926	1.00807	1.0027	0.0133732	0.00403216
0.714131	532.546	555.557	590.781	485.723	599.151	554.807	422.858	611.125	526.856	510.228	501.634		0.714131	510.546	533.557	568.781	463.723	577.151	532.807	400.858	589.125	504.856	488.228	479.634		0.714131	0.99259	1.00635	1.00986	1.02073	1.00652	0.998271	0.987484	1.0221	1.01387	1.01931	0.998404	1.00686	0.0116718	0.00351919
0.752542	536.187	552.262	582.534	474.96	608.486	559.268	424.575	598.989	511.739	500.043	506.579		0.752542	514.187	530.262	560.534	452.96	586.486	537.268	402.575	576.989	489.739	478.043	484.579		0.752542	0.999668	1.00013	0.995217	0.997035	1.0228	1.00663	0.991714	1.00104	0.98351	0.998048	1.0087	1.00041	0.0100747	0.00303763	0.00303763
0.778345	536.896	545.553	586.839	479.258	597.299	558.607	424.054	596.356	517.656	502.966	505.917		0.778345	514.896	523.553	564.839	457.258	575.299	536.607	402.054	574.356	495.656	480.966	483.917		0.778345	1.00105	0.987481	1.00286	1.0065	1.00329	1.00539	0.99043	0.996474	0.995393	1.00415	1.00732	1.00003	0.00666445	0.00200941
0.816756	532.111	561.871	583.016	484.788	599.761	547.533	422.319	591.852	526.37	506.471	501.345		0.816756	510.111	539.871	561.016	462.788	577.761	525.533	400.319	569.852	504.37	484.471	479.345		0.816756	0.991744	1.01826	0.996073	1.01867	1.00759	0.984643	0.986156	0.98866	1.01289	1.01147	0.997803	1.00127	0.0128995	0.00388933
0.838873	541.716	548.53	584.741	477.321	592.999	548.639	426.86	599.675	516.974	511.348	506.749		0.838873	519.716	526.53	562.741	455.321	570.999	526.639	404.86	577.675	494.974	489.348	484.749		0.838873	1.01042	0.993096	0.999135	1.00223	0.995794	0.986715	0.997343	1.00223	0.994023	1.02165	1.00905	1.00106	0.00970632	0.00292657
0.877283	535.093	544.705	586.801	481.373	583.409	546.226	429.611	599.143	509.62	504.848	498.825		0.877283	513.093	522.705	564.801	459.373	561.409	524.226	407.611	577.143	487.62	482.848	476.825		0.877283	0.997542	0.985881	1.00279	1.01115	0.979069	0.982194	1.00412	1.00131	0.979254	1.00808	0.992557	0.994905	0.0117338	0.00353787	0.00353787
0.903087	542.759	563.918	585.275	476.589	600.379	542.763	421.793	600.75	529.039	495.739	501.758		0.903087	520.759	541.918	563.275	454.589	578.379	520.763	399.793	578.75	507.039	473.739	479.758		0.903087	1.01245	1.02212	1.00008	1.00062	1.00866	0.975706	0.98486	1.0041	1.01825	0.989062	0.998662	1.00132	0.0141106	0.00425451
0.941497	541.248	553.612	577.314	477.983	591.398	548.226	430.823	597.065	523.442	506.548	503.31		0.941497	519.248	531.612	555.314	455.983	569.398	526.226	408.823	575.065	501.442	484.548	481.31		0.941497	1.00951	1.00268	0.985949	1.00369	0.993002	0.985941	1.00711	0.997704	1.00701	1.01163	1.00189	1.00056	0.00891965	0.00268938
0.963614	542.586	556.886	578.289	477.182	591.752	554.825	429.114	592.918	523.775	500.313	506.136		0.963614	520.586	534.886	556.289	455.182	569.752	532.825	407.114	570.918	501.775	478.313	484.136		0.963614	1.01211	1.00886	0.98768	1.00193	0.993619	0.998305	1.0029	0.990509	1.00768	0.998611	1.00778	1.00091	0.00796841	0.00240256
1.00202	536.201	552.145	593.764	471.808	592.795	540.385	433.745	592.932	518.645	487.729	496.042		1.00202	514.201	530.145	571.764	449.808	570.795	518.385	411.745	570.932	496.645	465.729	474.042		1.00202	0.999696	0.999914	1.01516	0.990097	0.995438	0.97125	1.0143	0.990534	0.997379	0.972339	0.986764	0.993897	0.0141666	0.00427139	0.00427139
1.02783	534.205	555.523	586.146	467.733	586.012	552.55	432.209	592.302	516.889	496.89	499.097		1.02783	512.205	533.523	564.146	445.733	564.012	530.55	410.209	570.302	494.889	474.89	477.097		1.02783	0.995815	1.00629	1.00163	0.981127	0.983609	0.994043	1.01052	0.989441	0.993852	0.991465	0.993123	0.994628	0.00884688	0.00266743
1.06624	543.513	542.048	589.998	471.249	595.997	548.103	431.267	598.072	524.065	502.606	502.252		1.06624	521.513	520.048	567.998	449.249	573.997	526.103	409.267	576.072	502.065	480.606	480.252		1.06624	1.01391	0.98087	1.00847	0.988867	1.00102	0.985711	1.0082	0.999451	1.00826	1.0034	0.999691	0.999805	0.0105235	0.00317294
1.08836	549.501	545.098	581.865	475.476	594.19	544.247	431.188	600.982	527.841	497.298	505.801		1.08836	527.501	523.098	559.865	453.476	572.19	522.247	409.188	578.982	505.841	475.298	483.801		1.08836	1.02555	0.986622	0.994029	0.998171	0.997871	0.978486	1.008	1.0045	1.01585	0.992317	1.00708	1.00077	0.0133279	0.00401852
1.12677	537.398	550.288	581.564	478.561	590.348	550.657	422.106	598.807	516.125	496.599	496.674		1.12677	515.398	528.288	559.564	456.561	568.348	528.657	400.106	576.807	494.125	474.599	474.674		1.12677	1.00202	0.996411	0.993495	1.00496	0.991171	0.990496	0.985631	1.00073	0.992318	0.990857	0.98808	0.994197	0.00611133	0.00184264	0.00184264
1.15257	538.641	542.258	582.253	473.203	589.781	543.658	435.967	596.476	519.832	495.473	506.071		1.15257	516.641	520.258	560.253	451.203	567.781	521.658	413.967	574.476	497.832	473.473	484.071		1.15257	1.00444	0.981266	0.994718	0.993168	0.990182	0.977382	1.01978	0.996682	0.999762	0.988507	1.00764	0.995775	0.0120396	0.00363006
1.19098	536.605	550.086	570.726	478.093	590.539	549.802	439.028	602.662	513.814	503.672	500.013		1.19098	514.605	528.086	548.726	456.093	568.539	527.802	417.028	580.662	491.814	481.672	478.013		1.19098	1.00048	0.99603	0.974252	1.00393	0.991504	0.988894	1.02732	1.00741	0.987677	1.00562	0.99503	0.998014	0.0136234	0.00410761
1.2131	525.634	553.089	578.227	474.417	588.727	557.774	436.633	596.236	525.276	501.498	506.582		1.2131	503.634	531.089	556.227	452.417	566.727	535.774	414.633	574.236	503.276	479.498	484.582		1.2131	0.979152	1.00169	0.98757	0.99584	0.988344	1.00383	1.02142	0.996266	1.0107	1.00109	1.0087	0.999509	0.0119215	0.00359446
1.25151	523.818	545.668	582.348	468.796	588.199	547.901	424.992	604.318	516.213	503.733	500.134		1.25151	501.818	523.668	560.348	446.796	566.199	525.901	402.992	582.318	494.213	481.733	478.134		1.25151	0.975621	0.987698	0.994887	0.983467	0.987423	0.985332	0.992741	1.01029	0.992495	1.00575	0.995282	0.991908	0.00984047	0.00296701	0.00296701
1.27731	525.601	542.005	578.594	468.991	593.752	547.895	422.543	599.408	511.666	506.94	500.844		1.27731	503.601	520.005	556.594	446.991	571.752	525.895	400.543	577.408	489.666	484.94	478.844		1.27731	0.979087	0.980789	0.988221	0.983896	0.997107	0.985321	0.986708	1.00177	0.983363	1.01245	0.99676	0.990497	0.010281	0.00309985
1.31572	538.792	543.832	589.667	471.018	597.792	545.578	428.957	597.648	518.515	493.635	503.332		1.31572	516.792	521.832	567.667	449.018	575.792	523.578	406.957	575.648	496.515	471.635	481.332		1.31572	1.00473	0.984235	1.00788	0.988358	1.00415	0.98098	1.00251	0.998716	0.997118	0.984669	1.00194	0.995935	0.00959645	0.00289344
1.33784	532.034	554.747	579.327	476.299	596.708	547.512	421.197	587.729	528.699	505.353	503.726		1.33784	510.034	532.747	557.327	454.299	574.708	525.512	399.197	565.729	506.699	483.353	481.726		1.33784	0.991594	1.00482	0.989523	0.999983	1.00226	0.984603	0.983392	0.981507	1.01757	1.00913	1.00276	0.997013	0.0116845	0.00352302
1.37625	535.061	548.14	583.862	469.763	592.254	551.994	429.31	596.919	510.092	499.113	505.715		1.37625	513.061	526.14	561.862	447.763	570.254	529.994	407.31	574.919	488.092	477.113	483.715		1.37625	0.997479	0.99236	0.997575	0.985596	0.994495	0.993001	1.00338	0.997451	0.980202	0.996106	1.0069	0.994958	0.00741893	0.00223689	0.00223689
1.4039	540.986	551.246	583.128	476.44	590.315	552.512	427.974	599.008	521.455	499.285	489.864		1.4039	518.986	529.246	561.128	454.44	568.315	530.512	405.974	577.008	499.455	477.285	467.864		1.4039	1.009	0.998218	0.996271	1.00029	0.991113	0.993971	1.00009	1.00108	1.00302	0.996465	0.973904	0.996674	0.00891962	0.00268937
1.44231	540.809	545.612	588.893	484.543	590.557	558.423	428.05	596.573	519.082	500.632	498.043		1.44231	518.809	523.612	566.893	462.543	568.557	536.423	406.05	574.573	497.082	478.632	476.043		1.44231	1.00865	0.987592	1.00651	1.01813	0.991535	1.00505	1.00027	0.996851	0.998256	0.999277	0.990929	1.00028	0.00889924	0.00268322
1.46442	536.383	544.239	584.706	474.532	592.294	559.574	420.342	601.806	520.858	503.225	500.139		1.46442	514.383	522.239	562.706	452.532	570.294	537.574	398.342	579.806	498.858	481.225	478.139		1.46442	1.00005	0.985002	0.999073	0.996093	0.994564	1.0072	0.981286	1.00593	1.00182	1.00469	0.995292	0.997364	0.00823973	0.00248437
1.50283	535.496	548.966	591.35	479.379	579.583	553.96	428.405	592.399	519.956	489.29	495.719		1.50283	513.496	526.966	569.35	457.379	557.583	531.96	406.405	570.399	497.956	467.29	473.719		1.50283	0.998325	0.993918	1.01087	1.00676	0.972397	0.996684	1.00115	0.989609	1.00001	0.975598	0.986092	0.993765	0.0120298	0.00362711	0.00362711
1.52864	535.958	545.674	580.175	477.267	589.344	554.798	434.092	594.877	523.952	490.403	503.65		1.52864	513.958	523.674	558.175	455.267	567.344	532.798	412.092	572.877	501.952	468.403	481.65		1.52864	0.999223	0.987709	0.991028	1.00211	0.98942	0.998254	1.01516	0.993908	1.00804	0.977922	1.0026	0.996852	0.0103359	0.00311638
1.56705	534.603	544.547	576.407	477.986	590.526	544.287	426.957	593.254	514.145	489.902	507.718		1.56705	512.603	522.547	554.407	455.986	568.526	522.287	404.957	571.254	492.145	467.902	485.718		1.56705	0.996589	0.985583	0.984338	1.0037	0.991481	0.978561	0.997581	0.991092	0.988342	0.976876	1.01107	0.991383	0.0103544	0.00312197
1.58917	535.378	549.036	578.416	470.006	602.067	550.196	416.638	591.569	527.154	498.185	494.068		1.58917	513.378	527.036	556.416	448.006	580.067	528.196	394.638	569.569	505.154	476.185	472.068		1.58917	0.998096	0.99405	0.987905	0.986131	1.01161	0.989632	0.972161	0.988169	1.01447	0.994169	0.982655	0.99264	0.0121786	0.00367198
1.62758	531.775	548.271	588.704	477.393	593.722	557.397	431.688	591.449	515.898	488.497	495.704		1.62758	509.775	526.271	566.704	455.393	571.722	535.397	409.688	569.449	493.898	466.497	473.704		1.62758	0.991091	0.992607	1.00617	1.00239	0.997055	1.00312	1.00924	0.987961	0.991862	0.973942	0.986061	0.994682	0.010271	0.00309684	0.00309684
1.65338	530.162	549.288	598.268	464.296	597.541	539.468	428.325	594.539	517.518	490.403	505.484		1.65338	508.162	527.288	576.268	442.296	575.541	517.468	406.325	572.539	495.518	468.403	483.484		1.65338	0.987955	0.994525	1.02315	0.973562	1.00371	0.969532	1.00095	0.993322	0.995115	0.977922	1.00642	0.993288	0.0156673	0.00472386
1.69179	528.559	554.206	584.581	466.309	595.37	549.212	430.834	598.94	516.597	497.948	495.67		1.69179	506.559	532.206	562.581	444.309	573.37	527.212	408.834	576.94	494.597	475.948	473.67		1.69179	0.984838	1.0038	0.998851	0.977993	0.999929	0.987788	1.00713	1.00096	0.993266	0.993674	0.98599	0.99402	0.0090507	0.00272889
1.71391	533.176	543.162	585.896	469.148	593.052	558.433	426.041	584.398	526.504	498.701	500.25		1.71391	511.176	521.162	563.896	447.148	571.052	536.433	404.041	562.398	504.504	476.701	478.25		1.71391	0.993815	0.982971	1.00119	0.984242	0.995886	1.00506	0.995325	0.975728	1.01316	0.995246	0.995523	0.994377	0.0104863	0.00316174
1.75232	525.558	547.086	584.316	472.148	598.735	557.03	424.043	591.297	511.11	492.948	492.269		1.75232	503.558	525.086	562.316	450.148	576.735	535.03	402.043	569.297	489.11	470.948	470.269		1.75232	0.979004	0.990372	0.998381	0.990846	1.0058	1.00244	0.990403	0.987697	0.982247	0.983235	0.97891	0.989939	0.00911319	0.00274773	0.00274773
1.77812	529.175	554.602	576.825	475.302	589.979	551.355	419.824	591.003	514.016	488.828	490.566		1.77812	507.175	532.602	554.825	453.302	567.979	529.355	397.824	569.003	492.016	466.828	468.566		1.77812	0.986036	1.00455	0.985081	0.997788	0.990527	0.991804	0.98001	0.987187	0.988083	0.974633	0.975365	0.987369	0.00895163	0.00269902
1.81653	536.313	546.57	581.023	473.096	594.875	546.14	431.032	589.268	522.05	493.772	495.6		1.81653	514.313	524.57	559.023	451.096	572.875	524.14	409.032	567.268	500.05	471.772	473.6		1.81653	0.999913	0.989399	0.992534	0.992932	0.999065	0.982033	1.00762	0.984177	1.00422	0.984955	0.985844	0.992972	0.00866822	0.00261357
1.83865	524.412	541.421	569.787	464.304	586.871	543.534	422.166	597.103	510.582	499.028	496.555		1.83865	502.412	519.421	547.787	442.304	564.871	521.534	400.166	575.103	488.582	477.028	474.555		1.83865	0.976776	0.979687	0.972585	0.97358	0.985107	0.97715	0.985779	0.99777	0.981186	0.995929	0.987832	0.983035	0.00839788	0.00253206
1.87706	531.264	548.855	579.864	475.734	591.391	568.763	424.154	590.674	519.48	496.698	486.803		1.87706	509.264	526.855	557.864	453.734	569.391	546.763	402.154	568.674	497.48	474.698	464.803		1.87706	0.990097	0.993709	0.990476	0.998739	0.99299	1.02442	0.990676	0.986616	0.999056	0.991064	0.967532	0.993216	0.0133044	0.00401143	0.00401143
1.90286	539.848	541.276	574.899	468.927	595.257	547.235	402.614	593.945	516.714	496.584	501.049		1.90286	517.848	519.276	552.899	446.927	573.257	525.235	380.614	571.945	494.714	474.584	479.049		1.90286	1.00679	0.979414	0.981661	0.983756	0.999732	0.984084	0.937614	0.992291	0.993501	0.990826	0.997187	0.986077	0.0181023	0.00545803
1.94127	531.157	548.531	576.652	462.312	595.098	557.783	420.856	598.707	512.199	504.889	498.47		1.94127	509.157	526.531	554.652	440.312	573.098	535.783	398.856	576.707	490.199	482.889	476.47		1.94127	0.989889	0.993098	0.984773	0.969195	0.999454	1.00385	0.982552	1.00055	0.984434	1.00817	0.991818	0.991616	0.0111949	0.00337539
1.96339	532.711	548.349	571.764	476.164	596.313	560.647	430.055	587.602	508.071	498.17	498.598		1.96339	510.711	526.349	549.764	454.164	574.313	538.647	408.055	565.602	486.071	476.17	476.598		1.96339	0.992911	0.992754	0.976095	0.999685	1.00157	1.00921	1.00521	0.981286	0.976144	0.994137	0.992085	0.992827	0.011132	0.00335643
2.0018	531.719	548.124	581.721	474.969	596.246	555.408	432.043	585.396	513.597	489.91	499.159		2.0018	509.719	526.124	559.721	452.969	574.246	533.408	410.043	563.396	491.597	467.91	477.159		2.0018	0.990982	0.99233	0.993773	0.997055	1.00146	0.999397	1.01011	0.977459	0.987241	0.976892	0.993252	0.992723	0.00979861	0.00295439	0.00295439
2.0276	538.143	547.894	569.145	469.638	596.814	545.283	425.127	596.117	514.865	500.661	490.999		2.0276	516.143	525.894	547.145	447.638	574.814	523.283	403.127	574.117	492.865	478.661	468.999		2.0276	1.00347	0.991896	0.971445	0.985321	1.00245	0.980427	0.993073	0.996059	0.989788	0.999338	0.976267	0.989957	0.0105821	0.00319064
2.06602	542.659	549.191	576.279	478.021	582.394	545.334	415.391	586.917	515.554	498.641	497.296		2.06602	520.659	527.191	554.279	456.021	560.394	523.334	393.391	564.917	493.554	476.641	475.296		2.06602	1.01225	0.994342	0.984111	1.00377	0.977299	0.980523	0.969089	0.980098	0.991171	0.995121	0.989374	0.988832	0.0124006	0.00373893
2.08813	547.16	539.395	573.505	476.688	599.37	537.983	423.202	610.389	515.989	498.754	490.99		2.08813	525.16	517.395	551.505	454.688	577.37	515.983	401.202	588.389	493.989	476.754	468.99		2.08813	1.021	0.975866	0.979186	1.00084	1.0069	0.96675	0.988331	1.02082	0.992045	0.995357	0.976248	0.993032	0.0181528	0.00547327
2.12654	543.602	550.197	577.951	475.28	600.734	551.549	426.88	587.114	511.293	492.235	496.936		2.12654	521.602	528.197	555.951	453.28	578.734	529.549	404.88	565.114	489.293	470.235	474.936		2.12654	1.01408	0.99624	0.98708	0.99774	1.00928	0.992167	0.997392	0.98044	0.982614	0.981746	0.988625	0.993401	0.0109879	0.00331297	0.00331297
2.15235	533.14	552.641	576.349	472.276	600.148	554.864	426.519	597.904	508.322	489.348	494.789		2.15235	511.14	530.641	554.349	450.276	578.148	532.864	404.519	575.904	486.322	467.348	472.789		2.15235	0.993745	1.00085	0.984235	0.991127	1.00826	0.998378	0.996502	0.99916	0.976648	0.975719	0.984156	0.991707	0.0103942	0.00313398
2.19076	531.046	555.077	567.69	475.302	589.04	550.304	423.201	591.686	511.666	504.557	489.066		2.19076	509.046	533.077	545.69	453.302	567.04	528.304	401.201	569.686	489.666	482.557	467.066		2.19076	0.989674	1.00544	0.968862	0.997788	0.988889	0.989834	0.988329	0.988372	0.983363	1.00747	0.972243	0.989115	0.0118694	0.00357877
2.21287	534.54	541.273	573.283	472.224	578.382	561.393	421.027	586.523	502.968	504.777	498.534		2.21287	512.54	519.273	551.283	450.224	556.382	539.393	399.027	564.523	480.968	482.777	476.534		2.21287	0.996466	0.979408	0.978792	0.991013	0.970302	1.01061	0.982973	0.979414	0.965896	1.00793	0.991951	0.986796	0.014312	0.00431523
2.25128	536.2	558.468	568.447	465.854	598.755	543.076	418.656	594.702	506.325	490.786	493.957		2.25128	514.2	536.468	546.447	443.854	576.755	521.076	396.656	572.702	484.325	468.786	471.957		2.25128	0.999694	1.01184	0.970206	0.976991	1.00583	0.976292	0.977133	0.993604	0.972637	0.978721	0.982424	0.985943	0.0143323	0.00432134	0.00432134
2.27893	523.829	546.888	572.903	467.032	586.892	551.062	419.695	593.564	513.044	496.916	501.096		2.27893	501.829	524.888	550.903	445.032	564.892	529.062	397.695	571.564	491.044	474.916	479.096		2.27893	0.975642	0.989999	0.978117	0.979584	0.985143	0.991255	0.979692	0.99163	0.986131	0.991519	0.997284	0.986	0.00695857	0.00209809
2.31734	526.448	549.263	579.707	471.406	590.232	540.326	419.007	597.972	513.098	503.179	501.641		2.31734	504.448	527.263	557.707	449.406	568.232	518.326	397.007	575.972	491.098	481.179	479.641		2.31734	0.980734	0.994478	0.990198	0.989212	0.990968	0.97114	0.977997	0.999278	0.986239	1.00459	0.998419	0.989387	0.00993614	0.00299586
2.33946	527.189	545.909	582.153	462.508	589.584	550.851	418.32	598.127	515.107	492.831	502.677		2.33946	505.189	523.909	560.153	440.508	567.584	528.851	396.32	576.127	493.107	470.831	480.677		2.33946	0.982175	0.988152	0.99454	0.969626	0.989838	0.990859	0.976305	0.999547	0.990274	0.982991	1.00058	0.987717	0.00939946	0.00283404
2.37787	532.384	543.333	567.476	472.257	593.925	557.364	429.703	602.849	512.554	490.42	506.602		2.37787	510.384	521.333	545.476	450.257	571.925	535.364	407.703	580.849	490.554	468.42	484.602		2.37787	0.992275	0.983293	0.968482	0.991085	0.997409	1.00306	1.00435	1.00774	0.985147	0.977957	1.00875	0.992686	0.0130423	0.0039324	0.0039324
2.40367	534.302	539.634	576.38	469.921	587.562	553.376	423.023	596.4	518.353	492.98	497.796		2.40367	512.302	517.634	554.38	447.921	565.562	531.376	401.023	574.4	496.353	470.98	475.796		2.40367	0.996004	0.976317	0.984291	0.985944	0.986312	0.99559	0.98789	0.99655	0.996792	0.983302	0.990415	0.989037	0.00667466	0.00201249
2.44208	541.638	545.237	575.477	472.328	582.42	557.703	421.263	598.698	517.491	501.556	493.105		2.44208	519.638	523.237	553.477	450.328	560.42	535.703	399.263	576.698	495.491	479.556	471.105		2.44208	1.01027	0.986885	0.982687	0.991242	0.977345	1.0037	0.983555	1.00054	0.995061	1.00121	0.98065	0.992103	0.0107971	0.00325544
2.4642	539.276	541.682	580.13	477.242	596.474	558.829	416.043	599.64	515.175	495.299	494.027		2.4642	517.276	519.682	558.13	455.242	574.474	536.829	394.043	577.64	493.175	473.299	472.027		2.4642	1.00567	0.98018	0.990949	1.00206	1.00185	1.00581	0.970696	1.00217	0.99041	0.988143	0.98257	0.992774	0.0117209	0.00353398
2.50261	532.811	541.578	567.214	472.147	596.576	558.569	420.601	604.574	516.02	499.335	497.387		2.50261	510.811	519.578	545.214	450.147	574.576	536.569	398.601	582.574	494.02	477.335	475.387		2.50261	0.993105	0.979983	0.968016	0.990843	1.00203	1.00532	0.981924	1.01073	0.992107	0.99657	0.989564	0.991836	0.0121621	0.003667	0.003667
2.52841	529.542	545.291	572.152	463.23	590.619	548.104	429.534	591.376	514.171	491.039	499.047		2.52841	507.542	523.291	550.152	441.23	568.619	526.104	407.534	569.376	492.171	469.039	477.047		2.52841	0.986749	0.986986	0.976784	0.971216	0.991643	0.985712	1.00393	0.987834	0.988394	0.979249	0.993019	0.986502	0.00871563	0.00262786
2.56682	526.042	548.745	579.227	459.147	597.091	537.716	422.106	595.302	507.31	493.527	501.302		2.56682	504.042	526.745	557.227	437.147	575.091	515.716	400.106	573.302	485.31	471.527	479.302		2.56682	0.979945	0.993501	0.989345	0.962228	1.00293	0.966249	0.985631	0.994645	0.974615	0.984444	0.997713	0.984659	0.0129238	0.00389668
2.58894	532.067	545.259	581.549	466.608	594.93	551.913	422.749	582.404	507.757	501.65	495.615		2.58894	510.067	523.259	559.549	444.608	572.93	529.913	400.749	560.404	485.757	479.65	473.615		2.58894	0.991659	0.986926	0.993468	0.978651	0.999161	0.992849	0.987215	0.972268	0.975513	1.0014	0.985875	0.987726	0.0093128	0.00280791
2.62735	525.475	548.23	582.439	472.045	590.67	549.887	422.344	586.107	518.904	493.202	497.112		2.62735	503.475	526.23	560.439	450.045	568.67	527.887	400.344	564.107	496.904	471.202	475.112		2.62735	0.978843	0.99253	0.995048	0.990619	0.991732	0.989053	0.986218	0.978693	0.997899	0.983765	0.988991	0.98849	0.00616455	0.00185868	0.00185868
2.65316	526.265	539.317	582.941	459.361	586.442	562.482	429.342	586.184	517.355	492.019	499.043		2.65316	504.265	517.317	560.941	437.361	564.442	540.482	407.342	564.184	495.355	470.019	477.043		2.65316	0.980378	0.975719	0.995939	0.962699	0.984359	1.01265	1.00346	0.978826	0.994788	0.981295	0.993011	0.987557	0.0140359	0.00423198
2.69157	531.589	539.094	587.471	478.735	590.659	554.967	418.53	585.336	522.533	494.967	501.41		2.69157	509.589	517.094	565.471	456.735	568.659	532.967	396.53	563.336	500.533	472.967	479.41		2.69157	0.990729	0.975298	1.00398	1.00534	0.991713	0.998571	0.976822	0.977355	1.00519	0.98745	0.997938	0.991854	0.0114889	0.00346402
2.71368	517.005	538.907	569.355	475.457	592.226	557.126	419.781	592.052	526.597	495.334	493.789		2.71368	495.005	516.907	547.355	453.457	570.226	535.126	397.781	570.052	504.597	473.334	471.789		2.71368	0.962375	0.974946	0.971818	0.998129	0.994446	1.00262	0.979904	0.989007	1.01335	0.988216	0.982074	0.986989	0.0147638	0.00445145
2.75209	526.746	540.364	575.125	471.05	584.285	560.179	420.316	593.243	519.751	495.968	489.736		2.75209	504.746	518.364	553.125	449.05	562.285	538.179	398.316	571.243	497.751	473.968	467.736		2.75209	0.981314	0.977694	0.982062	0.988429	0.980597	1.00834	0.981222	0.991073	0.9996	0.98954	0.973638	0.986682	0.0101697	0.00306628	0.00306628
2.7779	527.225	545.342	577.403	460.957	588.819	551.299	425.398	577.988	505.171	495.147	488.878		2.7779	505.225	523.342	555.403	438.957	566.819	529.299	403.398	555.988	483.171	473.147	466.878		2.7779	0.982245	0.987083	0.986107	0.966212	0.988504	0.991699	0.993741	0.964607	0.97032	0.987826	0.971852	0.980927	0.0106275	0.00320432
2.81631	521.016	540.315	576.847	462.555	579.361	551.954	418.472	585.07	517.646	491.041	495.964		2.81631	499.016	518.315	554.847	440.555	557.361	529.954	396.472	563.07	495.646	469.041	473.964		2.81631	0.970173	0.977601	0.98512	0.96973	0.97201	0.992926	0.976679	0.976893	0.995372	0.979254	0.986602	0.980215	0.00874956	0.00263809
2.83843	519.551	550.856	592.864	468.631	598.12	565.183	423.839	586.826	516.742	492.052	484.656		2.83843	497.551	528.856	570.864	446.631	576.12	543.183	401.839	564.826	494.742	470.052	462.656		2.83843	0.967325	0.997483	1.01356	0.983104	1.00472	1.01771	0.9899	0.97994	0.993557	0.981364	0.963063	0.990157	0.0175248	0.00528392
2.87684	527.232	537.6	579.668	471.334	583.811	563.496	426.026	584.034	516.192	486.888	495.681		2.87684	505.232	515.6	557.668	449.334	561.811	541.496	404.026	562.034	494.192	464.888	473.681		2.87684	0.982258	0.97248	0.990128	0.989054	0.97977	1.01455	0.995288	0.975096	0.992452	0.970583	0.986013	0.986152	0.0124954	0.0037675	0.0037675
2.90264	526.731	548.749	585.405	472.114	590.933	557.787	420.463	586.994	511.887	492.937	499.945		2.90264	504.731	526.749	563.405	450.114	568.933	535.787	398.463	564.994	489.887	470.937	477.945		2.90264	0.981284	0.993509	1.00031	0.990771	0.992191	1.00385	0.981584	0.980232	0.983807	0.983212	0.994889	0.989604	0.00815388	0.00245849
2.94105	513.638	543.566	576.621	461.654	580.843	548.506	421.654	590.152	514.001	498.434	500.18		2.94105	491.638	521.566	554.621	439.654	558.843	526.506	399.654	568.152	492.001	476.434	478.18		2.94105	0.955829	0.983733	0.984718	0.967747	0.974594	0.986466	0.984518	0.98571	0.988052	0.994688	0.995378	0.981949	0.0117043	0.00352899
2.96317	522.316	539.932	578.581	471.779	585.302	555.856	426.854	588.841	509	497.42	497.724		2.96317	500.316	517.932	556.581	449.779	563.302	533.856	404.854	566.841	487	475.42	475.724		2.96317	0.972701	0.976879	0.988198	0.990033	0.982371	1.00024	0.997328	0.983436	0.978009	0.992571	0.990265	0.986548	0.00868237	0.00261783
3.00158	522.897	556.416	570.635	469.714	586.662	546.543	424.07	579.173	519.914	509.563	494.774		3.00158	500.897	534.416	548.635	447.714	564.662	524.543	402.07	557.173	497.914	487.563	472.774		3.00158	0.97383	1.00797	0.97409	0.985488	0.984742	0.982788	0.99047	0.966663	0.999927	1.01792	0.984125	0.988001	0.0153336	0.00462325	0.00462325
3.02738	517.951	551.513	581.418	471.205	591.923	555.88	428.446	579.322	507.047	491.899	497.025		3.02738	495.951	529.513	559.418	449.205	569.923	533.88	406.446	557.322	485.047	469.899	475.025		3.02738	0.964215	0.998722	0.993235	0.98877	0.993917	1.00028	1.00125	0.966921	0.974087	0.981045	0.98881	0.986478	0.0131588	0.00396752
3.06579	519.778	541.611	578.629	469.404	585.29	560.701	422.905	590.519	497.006	495.583	500.118		3.06579	497.778	519.611	556.629	447.404	563.29	538.701	400.905	568.519	475.006	473.583	478.118		3.06579	0.967767	0.980046	0.988284	0.984806	0.98235	1.00931	0.9876	0.986347	0.953923	0.988736	0.995249	0.984038	0.0141907	0.00427866
3.08791	524.055	548.836	567.904	452.857	584.354	556.485	431.798	587.128	509.471	493.229	498.917		3.08791	502.055	526.836	545.904	430.857	562.354	534.485	409.798	565.128	487.471	471.229	476.917		3.08791	0.976082	0.993673	0.969242	0.948383	0.980717	1.00142	1.00951	0.980464	0.978955	0.983822	0.992749	0.983183	0.0164757	0.0049676
3.20116	336.618	344.962	360.556	301.014	382.436	357.096	281.45	361.078	327.565	315.219	325.174		3.20116	314.618	322.962	338.556	279.014	360.436	335.096	259.45	339.078	305.565	293.219	303.174		3.20116	0.611672	0.609143	0.601099	0.614153	0.628582	0.627838	0.639136	0.58828	0.613646	0.612176	0.631086	0.616074	0.0146321	0.00441174	0.00441174
3.23957	407.716	407.462	439.627	344.576	455.931	406.245	315.509	431.315	388.224	382.864	377.948		3.23957	385.716	385.462	417.627	322.576	433.931	384.245	293.509	409.315	366.224	360.864	355.948		3.23957	0.749899	0.727025	0.741488	0.71004	0.756754	0.719924	0.723038	0.710138	0.735463	0.753404	0.74094	0.733465	0.0166154	0.00500972
3.26169	416.958	424.757	445.53	355.806	470.078	423.123	325.282	450.07	394.877	389.626	384.812		3.26169	394.958	402.757	423.53	333.806	448.078	401.123	303.282	428.07	372.877	367.626	362.812		3.26169	0.767867	0.759646	0.751969	0.734759	0.781426	0.751547	0.747113	0.742676	0.748824	0.767522	0.755228	0.755325	0.0131308	0.00395908
3.3001	427.79	435.513	458.006	369.145	471.645	438.228	332.402	468.607	414.639	404.205	400.904		3.3001	405.79	413.513	436.006	347.145	449.645	416.228	310.402	446.607	392.639	382.205	378.904		3.3001	0.788926	0.779933	0.77412	0.76412	0.784158	0.779848	0.764652	0.774837	0.78851	0.797959	0.788725	0.780526	0.0105546	0.00318234
3.32222	434.357	440.41	463.326	373.346	486.313	440.522	342.216	467.687	416.995	409.618	404.322		3.32222	412.357	418.41	441.326	351.346	464.313	418.522	320.216	445.687	394.995	387.618	382.322		3.32222	0.801693	0.789169	0.783565	0.773367	0.809739	0.784146	0.788828	0.773241	0.793242	0.80926	0.79584	0.791099	0.0125056	0.00377058	0.00377058
3.36063	444.568	447.023	477.013	386.706	503.245	459.809	349.039	487.815	427.42	420.766	415.203		3.36063	422.568	425.023	455.013	364.706	481.245	437.809	327.039	465.815	405.42	398.766	393.203		3.36063	0.821545	0.801642	0.807866	0.802774	0.839267	0.820282	0.805636	0.808162	0.814178	0.832535	0.81849	0.815671	0.0121994	0.00367826
3.38275	445.752	457.843	479.991	385.447	505.661	465.143	357.997	489.717	429.556	425.001	414.685		3.38275	423.752	435.843	457.991	363.447	483.661	443.143	335.997	467.717	407.556	403.001	392.685		3.38275	0.823847	0.82205	0.813154	0.800003	0.843481	0.830276	0.827704	0.811462	0.818467	0.841377	0.817412	0.822657	0.012819	0.00386507
3.42116	446.457	467.049	486.856	386.413	500.795	462.401	357.812	498.593	426.074	415.868	422.697		3.42116	424.457	445.049	464.856	364.413	478.795	440.401	335.812	476.593	404.074	393.868	400.697		3.42116	0.825218	0.839413	0.825342	0.80213	0.834995	0.825139	0.827248	0.826861	0.811475	0.822309	0.834089	0.824929	0.0105458	0.00317967
3.44327	451.217	471.821	486.462	395.266	510.549	473.69	366.175	498.665	442.284	429.734	422.576		3.44327	429.217	449.821	464.462	373.266	488.549	451.69	344.175	476.665	420.284	407.734	400.576		3.44327	0.834472	0.848414	0.824643	0.821616	0.852005	0.84629	0.84785	0.826986	0.844028	0.851258	0.833838	0.839218	0.0112429	0.00338987	0.00338987
3.48168	460.457	469.924	505.105	405.091	512.421	477.9	367.059	509.255	437.366	434.521	427.355		3.48168	438.457	447.924	483.105	383.091	490.421	455.9	345.059	487.255	415.366	412.521	405.355		3.48168	0.852436	0.844836	0.857743	0.843243	0.85527	0.854178	0.850027	0.845359	0.834152	0.861252	0.843785	0.849298	0.00784843	0.00236639
3.5038	453.581	480.355	495.596	400.466	516.551	475.381	379.814	509.757	446.517	432.747	429.144		3.5038	431.581	458.355	473.596	378.466	494.551	453.381	357.814	487.757	424.517	410.747	407.144		3.5038	0.839068	0.86451	0.84086	0.833062	0.862472	0.849458	0.881448	0.84623	0.852529	0.857549	0.847509	0.852245	0.0136881	0.00412713
3.54221	472.409	481.721	498.595	401.156	509.424	470.427	371.929	513.819	450.849	440.339	426.982		3.54221	450.409	459.721	476.595	379.156	487.424	448.427	349.929	491.819	428.849	418.339	404.982		3.54221	0.875673	0.867086	0.846185	0.834581	0.850043	0.840176	0.862024	0.853277	0.861229	0.873399	0.843009	0.855153	0.0137315	0.00414021
3.56433	471.515	470.085	502.315	406.365	518.532	481.598	370.201	513.72	452.83	438.196	435.455		3.56433	449.515	448.085	480.315	384.365	496.532	459.598	348.201	491.72	430.83	416.196	413.455		3.56433	0.873935	0.845139	0.85279	0.846047	0.865927	0.861106	0.857767	0.853105	0.865207	0.868925	0.860646	0.859145	0.00921799	0.00277933	0.00277933
3.60274	472.553	484.554	498.186	425.344	518.484	482.358	380.001	518.397	452.365	449.806	433.223		3.60274	450.553	462.554	476.186	403.344	496.484	460.358	358.001	496.397	430.365	427.806	411.223		3.60274	0.875953	0.87243	0.845459	0.887823	0.865843	0.86253	0.881909	0.86122	0.864273	0.893164	0.856	0.869691	0.0142041	0.0042827
3.62854	468.977	478.795	509.809	417.527	529.29	498.767	373.916	519.234	455.427	448.39	447.06		3.62854	446.977	456.795	487.809	395.527	507.29	476.767	351.916	497.234	433.427	426.39	425.06		3.62854	0.869001	0.861567	0.866095	0.870616	0.884688	0.893274	0.866919	0.862672	0.870422	0.890208	0.884803	0.87457	0.0114295	0.00344613
3.66695	471.837	486.45	507.804	414.401	537.459	492.131	373.427	519.885	468.746	448.287	440.243		3.66695	449.837	464.45	485.804	392.401	515.459	470.131	351.427	497.885	446.746	426.287	418.243		3.66695	0.874561	0.876006	0.862535	0.863735	0.898935	0.880841	0.865714	0.863801	0.89717	0.889993	0.870613	0.876719	0.0134355	0.00405096
3.68907	466.8	489.432	520.702	415.881	543.191	487.352	382.932	524.641	449.267	450.54	443.272		3.68907	444.8	467.432	498.702	393.881	521.191	465.352	360.932	502.641	427.267	428.54	421.272		3.68907	0.864768	0.88163	0.885435	0.866993	0.908931	0.871887	0.889129	0.872053	0.858052	0.894696	0.876918	0.879136	0.0147706	0.00445352	0.00445352
3.72748	482.776	487.027	521.912	424.047	544.253	490.615	381.919	528.05	457.823	451.509	449.72		3.72748	460.776	465.027	499.912	402.047	522.253	468.615	359.919	506.05	435.823	429.509	427.72		3.72748	0.895828	0.877094	0.887584	0.884968	0.910783	0.878001	0.886634	0.877967	0.875234	0.896719	0.89034	0.887377	0.0107303	0.00323531
3.75513	479.02	491.873	526.612	425.522	538.121	504.289	381.121	520.218	460.484	455.957	450.615		3.75513	457.02	469.873	504.612	403.522	516.121	482.289	359.121	498.218	438.484	433.957	428.615		3.75513	0.888526	0.886234	0.895928	0.888214	0.900089	0.90362	0.884668	0.864379	0.880578	0.906006	0.892203	0.890041	0.0117331	0.00353767
3.79354	473.53	493.618	523.688	425.639	539.05	496.368	386.08	529.451	465.381	459.715	442.255		3.79354	451.53	471.618	501.688	403.639	517.05	474.368	364.08	507.451	443.381	437.715	420.255		3.79354	0.877852	0.889525	0.890737	0.888472	0.901709	0.88878	0.896884	0.880398	0.890412	0.913852	0.874801	0.890311	0.0110809	0.00334103
3.81565	476.118	493.452	525.09	417.136	549.883	486.965	384.585	529.12	463.22	455.435	455.306		3.81565	454.118	471.452	503.09	395.136	527.883	464.965	362.585	507.12	441.22	433.435	433.306		3.81565	0.882884	0.889212	0.893226	0.869756	0.920602	0.871162	0.893201	0.879824	0.886072	0.904916	0.901968	0.890257	0.0150236	0.00452977	0.00452977
3.85407	482.634	502.544	530.146	427.087	551.525	491.936	393.17	535.099	474.361	459.862	452.251		3.85407	460.634	480.544	508.146	405.087	529.525	469.936	371.17	513.099	452.361	437.862	430.251		3.85407	0.895552	0.906361	0.902203	0.891659	0.923465	0.880476	0.91435	0.890197	0.908446	0.914159	0.895609	0.902043	0.012703	0.00383009
3.87987	483.019	495.752	520.384	420.39	542.375	500.367	381.573	526.449	475.516	459.051	453.098		3.87987	461.019	473.752	498.384	398.39	520.375	478.367	359.573	504.449	453.516	437.051	431.098		3.87987	0.896301	0.89355	0.884871	0.876918	0.907508	0.896272	0.885781	0.875189	0.910766	0.912465	0.897372	0.894272	0.0127368	0.00384028
3.91828	486.225	495.488	522.669	430.306	550.924	498.048	390.961	538.818	469.207	458.679	451.024		3.91828	464.225	473.488	500.669	408.306	528.924	476.048	368.961	516.818	447.207	436.679	429.024		3.91828	0.902534	0.893052	0.888928	0.898745	0.922417	0.891927	0.908908	0.896649	0.898096	0.911689	0.893055	0.900545	0.0101112	0.00304863
3.9404	489.695	500.726	535.156	422.43	545.042	505.204	396.427	540.213	474.427	456.252	457.927		3.9404	467.695	478.726	513.156	400.43	523.042	483.204	374.427	518.213	452.427	434.252	435.927		3.9404	0.90928	0.902932	0.911098	0.881409	0.912159	0.905335	0.922373	0.899069	0.908579	0.906622	0.907424	0.906025	0.010072	0.00303682	0.00303682
3.97881	482.461	505.544	525.487	421.945	538.398	506.911	390.626	535.495	480.177	454.936	460.471		3.97881	460.461	483.544	503.487	399.945	516.398	484.911	368.626	513.495	458.177	432.936	438.471		3.97881	0.895216	0.912019	0.893931	0.880341	0.900572	0.908533	0.908083	0.890884	0.920126	0.903874	0.91272	0.902391	0.0115378	0.00347878
4.00461	489.091	505.347	533.115	423.034	543.763	512.594	396.529	533.335	468.074	463.629	458.741		4.00461	467.091	483.347	511.115	401.034	521.763	490.594	374.529	511.335	446.074	441.629	436.741		4.00461	0.908106	0.911648	0.907474	0.882738	0.909929	0.919181	0.922624	0.887136	0.89582	0.922023	0.909118	0.906891	0.0132754	0.00400269
4.04302	491.761	504.583	529.737	424.852	548.593	510.523	392.323	545.289	479.218	459.308	455.511		4.04302	469.761	482.583	507.737	402.852	526.593	488.523	370.323	523.289	457.218	437.308	433.511		4.04302	0.913297	0.910207	0.901477	0.88674	0.918352	0.9153	0.912263	0.907876	0.9182	0.913002	0.902395	0.90901	0.00924871	0.00278859
4.06514	488.151	506.332	532.097	427.568	550.385	507.538	388.844	537.647	474.092	467.596	459.91		4.06514	466.151	484.332	510.097	405.568	528.385	485.538	366.844	515.647	452.092	445.596	437.91		4.06514	0.906278	0.913505	0.905667	0.892718	0.921477	0.909708	0.903693	0.894617	0.907906	0.930306	0.911552	0.908857	0.0107542	0.00324252	0.00324252
4.10355	501.082	509.146	536.426	440.706	553.33	507.508	396.385	542.404	473.066	473.848	455.49		4.10355	479.082	487.146	514.426	418.706	531.33	485.508	374.385	520.404	451.066	451.848	433.49		4.10355	0.931418	0.918813	0.913353	0.921637	0.926613	0.909651	0.92227	0.90287	0.905845	0.943358	0.902351	0.918016	0.0128149	0.00386383
4.12935	478.862	510.78	537.349	432.855	557.486	520.423	392.249	535.122	478.357	465.313	459.814		4.12935	456.862	488.78	515.349	410.855	535.486	498.423	370.249	513.122	456.357	443.313	437.814		4.12935	0.888219	0.921895	0.914992	0.904356	0.933861	0.933849	0.912081	0.890237	0.916471	0.925539	0.911352	0.913896	0.0152446	0.00459641
4.16776	487.104	515.738	536.849	429.429	558.565	511.982	395.128	543.513	478.961	468.627	456.671		4.16776	465.104	493.738	514.849	407.429	536.565	489.982	373.128	521.513	456.961	446.627	434.671		4.16776	0.904243	0.931246	0.914104	0.896814	0.935743	0.918034	0.919173	0.904795	0.917684	0.932458	0.90481	0.916282	0.0129227	0.00389633
4.18988	489.05	508.773	535.867	430.662	564.458	507.92	393.462	545.148	481.546	473.999	460.266		4.18988	467.05	486.773	513.867	408.662	542.458	485.92	371.462	523.148	459.546	451.999	438.266		4.18988	0.908026	0.918109	0.912361	0.899528	0.94602	0.910423	0.915069	0.907631	0.922875	0.943674	0.912293	0.917819	0.01465	0.00441714	0.00441714
4.22829	493.959	506.962	542.297	435.432	558.686	503.881	401.928	539.885	485.273	461.671	465.616		4.22829	471.959	484.962	520.297	413.432	536.686	481.881	379.928	517.885	463.273	439.671	443.616		4.22829	0.91757	0.914694	0.923777	0.910028	0.935954	0.902856	0.935924	0.8985	0.93036	0.917935	0.923429	0.919184	0.0123615	0.00372714
4.25409	491.15	503.64	532.188	435.285	566.724	516.82	389.797	540.013	475.88	465.378	466.878		4.25409	469.15	481.64	510.188	413.285	544.724	494.82	367.797	518.013	453.88	443.378	444.878		4.25409	0.912109	0.908428	0.905829	0.909704	0.949971	0.927099	0.906041	0.898722	0.911497	0.925675	0.926056	0.916466	0.0145022	0.00437258
4.2925	498.876	504.664	531.303	430.57	555.279	517.769	397.852	542.83	482.757	468.343	467.76		4.2925	476.876	482.664	509.303	408.57	533.279	495.769	375.852	520.83	460.757	446.343	445.76		4.2925	0.927129	0.910359	0.904257	0.899326	0.930012	0.928877	0.925883	0.90361	0.925307	0.931865	0.927892	0.919502	0.0123686	0.00372928
4.31462	487.518	514.025	539.131	435.502	567.016	511.053	403.202	541.223	483.012	473.345	466.419		4.31462	465.518	492.025	517.131	413.502	545.016	489.053	381.202	519.223	461.012	451.345	444.419		4.31462	0.905048	0.928015	0.918156	0.910182	0.950481	0.916293	0.939063	0.900822	0.925819	0.942308	0.925101	0.923753	0.0156978	0.00473306	0.00473306
4.35303	486.499	511.045	543.278	438.942	568.256	509.251	405.65	543.481	487.247	475.727	462.559		4.35303	464.499	489.045	521.278	416.942	546.256	487.251	383.65	521.481	465.247	453.727	440.559		4.35303	0.903066	0.922395	0.925519	0.917754	0.952643	0.912917	0.945093	0.904739	0.934324	0.947281	0.917066	0.925709	0.0170466	0.00513973
4.37883	498.251	516.441	536.382	431.004	558.351	524.454	399.224	543.629	482.033	467.38	467.056		4.37883	476.251	494.441	514.382	409.004	536.351	502.454	377.224	521.629	460.033	445.38	445.056		4.37883	0.925914	0.932572	0.913275	0.900281	0.935369	0.941402	0.929263	0.904996	0.923853	0.929855	0.926427	0.923928	0.0127115	0.00383267
4.41725	487.399	519.344	535.88	435.518	560.167	509.7	393.405	551.493	488.356	472.55	472.903		4.41725	465.399	497.344	513.88	413.518	538.167	487.7	371.405	529.493	466.356	450.55	450.903		4.41725	0.904816	0.938047	0.912384	0.910217	0.938536	0.913758	0.914929	0.918639	0.936551	0.940648	0.938598	0.924284	0.0140157	0.00422589
4.43936	499.252	513.599	535.62	435.431	564.429	523.664	406.001	535.798	486.651	472.301	458.884		4.43936	477.252	491.599	513.62	413.431	542.429	501.664	384.001	513.798	464.651	450.301	436.884		4.43936	0.92786	0.927212	0.911922	0.910026	0.945969	0.939921	0.945958	0.891409	0.933127	0.940129	0.909416	0.925723	0.0178053	0.0053685	0.0053685
4.47777	499.992	526.629	542.803	440.007	568.208	519.351	404.006	555.91	473.798	477.447	463.455		4.47777	477.992	504.629	520.803	418.007	546.208	497.351	382.006	533.91	451.798	455.447	441.455		4.47777	0.929299	0.951788	0.924675	0.920098	0.95256	0.931841	0.941043	0.926303	0.907315	0.950872	0.918931	0.932248	0.0150557	0.00453945
4.50358	491.347	522.657	545.21	445.938	572.364	521.549	394.817	561.335	495.679	474.666	462.508		4.50358	469.347	500.657	523.21	423.938	550.364	499.549	372.817	539.335	473.679	452.666	440.508		4.50358	0.912492	0.944296	0.928949	0.933153	0.959807	0.935959	0.918407	0.935715	0.951258	0.945066	0.91696	0.934733	0.0148847	0.00448789
4.54199	499.577	514.193	543.189	442.648	557.877	522.042	400.962	546.663	491.368	475.447	468.314		4.54199	477.577	492.193	521.189	420.648	535.877	500.042	378.962	524.663	469.368	453.447	446.314		4.54199	0.928492	0.928332	0.925361	0.925911	0.934543	0.936883	0.933545	0.91026	0.9426	0.946697	0.929046	0.931061	0.00969343	0.00292268
4.5641	497.852	510.178	534.51	436.024	556.403	525.751	402.732	543.984	488.871	467.724	469.915		4.5641	475.852	488.178	512.51	414.024	534.403	503.751	380.732	521.984	466.871	445.724	447.915		4.5641	0.925139	0.920759	0.909951	0.911331	0.931972	0.943832	0.937905	0.905612	0.937586	0.930573	0.932378	0.926094	0.0126796	0.00382304	0.00382304
4.60251	502.979	513.724	550.445	434.424	561.001	514.457	397.808	543.058	496.237	471.945	463.457		4.60251	480.979	491.724	528.445	412.424	539.001	492.457	375.808	521.058	474.237	449.945	441.457		4.60251	0.935106	0.927448	0.938243	0.907809	0.939991	0.922671	0.925775	0.904005	0.952378	0.939385	0.918935	0.928341	0.014564	0.00439121
4.63016	493.156	517.069	539.572	437.354	560.388	518.01	405.195	554.358	496.313	476.037	470.101		4.63016	471.156	495.069	517.572	415.354	538.388	496.01	383.195	532.358	474.313	454.037	448.101		4.63016	0.916009	0.933757	0.918939	0.914259	0.938922	0.929328	0.943972	0.92361	0.952531	0.947928	0.932765	0.932002	0.0129952	0.00391821
4.66857	492.933	521.683	542.203	441.064	560.616	523.344	406.173	546.294	501.93	476.81	467.474		4.66857	470.933	499.683	520.203	419.064	538.616	501.344	384.173	524.294	479.93	454.81	445.474		4.66857	0.915575	0.942459	0.92361	0.922425	0.939319	0.939322	0.946382	0.909619	0.963811	0.949542	0.927297	0.934487	0.0162169	0.00488959
4.69069	499.412	512.658	542.793	440.509	560.258	517.503	408.633	543.83	494.263	474.854	462.963		4.69069	477.412	490.658	520.793	418.509	538.258	495.503	386.633	521.83	472.263	452.854	440.963		4.69069	0.928172	0.925437	0.924657	0.921203	0.938695	0.928378	0.952442	0.905345	0.948414	0.945459	0.917907	0.930555	0.0142855	0.00430723	0.00430723
4.7291	503.316	514.036	549.659	438.745	567.29	535.647	402.599	553.344	503.546	478.306	465.165		4.7291	481.316	492.036	527.659	416.745	545.29	513.647	380.599	531.344	481.546	456.306	443.165		4.7291	0.935762	0.928036	0.936848	0.91732	0.950959	0.962373	0.937577	0.921851	0.967056	0.952666	0.922491	0.939358	0.0168399	0.00507742
4.7549	500.331	515.888	548.901	436.59	561.881	517.031	401.723	559.584	493.594	484.645	470.356		4.7549	478.331	493.888	526.901	414.59	539.881	495.031	379.723	537.584	471.594	462.645	448.356		4.7549	0.929958	0.931529	0.935502	0.912577	0.941526	0.927494	0.935419	0.932677	0.94707	0.9659	0.933296	0.935723	0.0132011	0.00398028
4.79331	496.049	522.899	534.891	439.584	564.979	522.326	403.905	552.541	498.319	481.341	467.193		4.79331	474.049	500.899	512.891	417.584	542.979	500.326	381.905	530.541	476.319	459.341	445.193		4.79331	0.921633	0.944753	0.910628	0.919167	0.946928	0.937415	0.940795	0.920458	0.956559	0.959002	0.926712	0.934914	0.01619	0.00488147
4.81543	499.379	515.759	543.65	443.871	566.989	515.659	411.728	562.713	483.313	474.427	478.161		4.81543	477.379	493.759	521.65	421.871	544.989	493.659	389.728	540.713	461.313	452.427	456.161		4.81543	0.928107	0.931286	0.926179	0.928603	0.950434	0.924923	0.960066	0.938105	0.926424	0.944567	0.949543	0.937113	0.0121869	0.00367448	0.00367448
4.85384	499.702	518.925	545.839	450.692	573.052	525.338	408.605	558.248	484.216	476.821	470.678		4.85384	477.702	496.925	523.839	428.692	551.052	503.338	386.605	536.248	462.216	454.821	448.678		4.85384	0.928735	0.937257	0.930066	0.943618	0.961007	0.943058	0.952373	0.930359	0.928237	0.949565	0.933966	0.93984	0.0109948	0.00331506
4.87964	500.937	523.627	540.987	443.259	567.483	523.266	405.193	559.252	493.294	479.698	473.705		4.87964	478.937	501.627	518.987	421.259	545.483	501.266	383.193	537.252	471.294	457.698	451.705		4.87964	0.931136	0.946126	0.921451	0.927256	0.951295	0.939176	0.943967	0.932101	0.946468	0.955572	0.940267	0.939529	0.0105399	0.0031779
4.91806	501.382	512.209	540.861	443.769	574.713	524.927	406.603	559.974	497.258	479.744	461.264		4.91806	479.382	490.209	518.861	421.769	552.713	502.927	384.603	537.974	475.258	457.744	439.264		4.91806	0.932002	0.92459	0.921227	0.928379	0.963904	0.942288	0.947441	0.933353	0.954429	0.955668	0.91437	0.937968	0.0159067	0.00479604
4.94017	504.749	521.246	539.198	444.282	559.757	510.589	414.299	546.12	484.256	474.829	470.368		4.94017	482.749	499.246	517.198	422.282	537.757	488.589	392.299	524.12	462.256	452.829	448.368		4.94017	0.938548	0.941635	0.918275	0.929508	0.937821	0.915424	0.966399	0.909318	0.928318	0.945406	0.933321	0.933088	0.0158706	0.00478517	0.00478517
4.97858	493.658	515.138	541.523	431.92	567.333	522.518	414.451	559.54	498.869	483.68	475.91		4.97858	471.658	493.138	519.523	409.92	545.333	500.518	392.451	537.54	476.869	461.68	453.91		4.97858	0.916985	0.930114	0.922403	0.902297	0.951034	0.937774	0.966774	0.9326	0.957664	0.963885	0.944857	0.938763	0.0203621	0.00613939
5.00439	489.609	509.28	544.613	440.664	565.687	522.877	402.929	552.254	491.352	476.444	469.753		5.00439	467.609	487.28	522.613	418.664	543.687	500.877	380.929	530.254	469.352	454.444	447.753		5.00439	0.909113	0.919066	0.927889	0.921544	0.948163	0.938447	0.93839	0.91996	0.942568	0.948778	0.932041	0.931451	0.0130224	0.0039264
5.0428	507.742	509.909	541.262	450.597	564.871	509.52	402.545	559.855	498.06	480.377	475.636		5.0428	485.742	487.909	519.262	428.597	542.871	487.52	380.545	537.855	476.06	458.377	453.636		5.0428	0.944366	0.920252	0.921939	0.943408	0.94674	0.913421	0.937444	0.933147	0.956039	0.956989	0.944287	0.938003	0.0143966	0.00434075
5.06491	500.754	508.317	540.321	443.663	559.432	515.884	403.554	560.696	491.569	474.023	477.818		5.06491	478.754	486.317	518.321	421.663	537.432	493.884	381.554	538.696	469.569	452.023	455.818		5.06491	0.930781	0.917249	0.920269	0.928146	0.937255	0.925345	0.93993	0.934606	0.943004	0.943724	0.948829	0.933558	0.0101399	0.00305731	0.00305731
5.10332	501.984	520.914	548.572	450.057	568.059	524.341	407.745	553.216	493.464	484.967	477.78		5.10332	479.984	498.914	526.572	428.057	546.059	502.341	385.745	531.216	471.464	462.967	455.78		5.10332	0.933172	0.941009	0.934918	0.94222	0.9523	0.94119	0.950254	0.921629	0.946809	0.966572	0.94875	0.943529	0.0116865	0.00352362
5.12913	494.252	526.434	540.742	440.416	576.811	522.091	416.229	557.922	494.123	477.905	479.495		5.12913	472.252	504.434	518.742	418.416	554.811	500.091	394.229	535.922	472.123	455.905	457.495		5.12913	0.91814	0.95142	0.921016	0.920998	0.967563	0.936974	0.971154	0.929793	0.948133	0.951828	0.95232	0.942667	0.018582	0.0056027
5.16754	495.925	517.386	543.622	442.283	570.985	518.391	405.136	555.689	491.467	478.934	470.661		5.16754	473.925	495.386	521.622	420.283	548.985	496.391	383.136	533.689	469.467	456.934	448.661		5.16754	0.921392	0.934354	0.926129	0.925108	0.957402	0.930042	0.943827	0.925919	0.942799	0.953977	0.933931	0.935898	0.012092	0.00364588
5.18966	502.289	504.66	551.212	436.292	568.865	523.61	404.741	559.262	488.455	483.045	466.785		5.18966	480.289	482.66	529.212	414.292	546.865	501.61	382.741	537.262	466.455	461.045	444.785		5.18966	0.933765	0.910352	0.939605	0.911921	0.953705	0.93982	0.942854	0.932118	0.93675	0.96256	0.925863	0.935392	0.0156538	0.0047198	0.0047198
5.22807	498.202	517.962	547.812	441.162	571.659	519.696	404.263	558.357	494.331	480.296	482.035		5.22807	476.202	495.962	525.812	419.162	549.659	497.696	382.263	536.357	472.331	458.296	460.035		5.22807	0.925819	0.935441	0.933569	0.922641	0.958578	0.932487	0.941676	0.930548	0.948551	0.95682	0.957607	0.94034	0.0131267	0.00395786
5.25387	511.661	526.446	540.27	444.303	570.752	531.105	410.879	559.991	488.687	487.104	470.124		5.25387	489.661	504.446	518.27	422.303	548.752	509.105	388.879	537.991	466.687	465.104	448.124		5.25387	0.951986	0.951443	0.920178	0.929554	0.956996	0.953863	0.957975	0.933383	0.937216	0.971034	0.932813	0.945131	0.015354	0.0046294
5.29228	494.151	526.347	550.962	450.149	565.382	527.637	402.584	562.942	506.841	474.975	470.777		5.29228	472.151	504.347	528.962	428.149	543.382	505.637	380.584	540.942	484.841	452.975	448.777		5.29228	0.917943	0.951256	0.939161	0.942422	0.947631	0.947365	0.93754	0.938503	0.973674	0.945711	0.934173	0.943216	0.0135175	0.00407568
5.3144	496.604	521.126	548.034	445.142	568.669	527.785	396.179	558.427	496.417	476.647	466.692		5.3144	474.604	499.126	526.034	423.142	546.669	505.785	374.179	536.427	474.417	454.647	444.692		5.3144	0.922712	0.941409	0.933963	0.931401	0.953363	0.947643	0.921762	0.930669	0.95274	0.949202	0.925669	0.937321	0.0120055	0.0036198	0.0036198
5.35281	503.797	522.487	555.982	447.97	582.013	536.257	407.482	558.058	495.517	483.558	475.77		5.35281	481.797	500.487	533.982	425.97	560.013	514.257	385.482	536.058	473.517	461.558	453.77		5.35281	0.936697	0.943976	0.948074	0.937626	0.976635	0.963516	0.949606	0.930029	0.950932	0.963631	0.944566	0.949572	0.0136943	0.00412899
5.37861	505.672	526.195	546.595	435.277	563.074	521.167	404.298	560.172	501.832	490.439	478.48		5.37861	483.672	504.195	524.595	413.277	541.074	499.167	382.298	538.172	479.832	468.439	456.48		5.37861	0.940342	0.950969	0.931408	0.909687	0.943606	0.935243	0.941763	0.933697	0.963614	0.977997	0.950207	0.943503	0.0177826	0.00536166
5.41702	503.047	533.294	552.076	444.265	568.444	525.963	422.986	555.575	490.156	484.995	475.266		5.41702	481.047	511.294	530.076	422.265	546.444	503.963	400.986	533.575	468.156	462.995	453.266		5.41702	0.935239	0.964359	0.941139	0.929471	0.952971	0.944229	0.987799	0.925721	0.940166	0.966631	0.943517	0.948295	0.0183514	0.00553315
5.43914	507.522	514.354	558.307	434.896	574.238	523.45	401.406	559.895	484.136	488.351	483.318		5.43914	485.522	492.354	536.307	412.896	552.238	501.45	379.406	537.895	462.136	466.351	461.318		5.43914	0.943939	0.928636	0.952202	0.908848	0.963076	0.939521	0.934638	0.933216	0.928077	0.973637	0.960278	0.94237	0.0186937	0.00563635	0.00563635
5.47755	516.457	517.825	546.71	433.27	571.562	512.309	405.205	554.165	495.718	492.245	473.965		5.47755	494.457	495.825	524.71	411.27	549.562	490.309	383.205	532.165	473.718	470.245	451.965		5.47755	0.96131	0.935182	0.931612	0.905269	0.958409	0.918647	0.943997	0.923275	0.951336	0.981767	0.940809	0.941056	0.021693	0.00654068
5.5052	507.883	528.871	547.755	445.172	572.318	515.825	396.204	564.63	494.842	480.195	465.258		5.5052	485.883	506.871	525.755	423.172	550.318	493.825	374.204	542.63	472.842	458.195	443.258		5.5052	0.944641	0.956017	0.933467	0.931467	0.959727	0.925234	0.921824	0.941431	0.949577	0.956609	0.922684	0.940244	0.0141419	0.00426394
5.54361	508.304	528.99	542.512	447.976	566.973	525.406	407.055	551.66	504.773	488.269	470.927		5.54361	486.304	506.99	520.512	425.976	544.973	503.406	385.055	529.66	482.773	466.269	448.927		5.54361	0.945459	0.956241	0.924159	0.937639	0.950406	0.943185	0.948554	0.918929	0.96952	0.973466	0.934485	0.94564	0.0169044	0.00509687
5.56572	503.24	528.248	546.104	441.907	568.948	517.242	410.47	567.032	500.15	486.077	471.722		5.56572	481.24	506.248	524.104	419.907	546.948	495.242	388.47	545.032	478.15	464.077	449.722		5.56572	0.935614	0.954841	0.930536	0.92428	0.95385	0.927889	0.956967	0.945599	0.960236	0.96889	0.93614	0.944986	0.014898	0.00449192	0.00449192
5.60413	509.071	532.221	545.183	438.882	567.414	527.177	399.665	548.685	481.917	484.769	471.265		5.60413	487.071	510.221	523.183	416.882	545.414	505.177	377.665	526.685	459.917	462.769	449.265		5.60413	0.94695	0.962335	0.928901	0.917622	0.951175	0.946503	0.93035	0.913768	0.92362	0.966159	0.935188	0.938416	0.0175148	0.00528092
5.62994	517.906	527.612	544.033	443.262	568.944	532.685	402.606	561.774	485.662	481.42	472.723		5.62994	495.906	505.612	522.033	421.262	546.944	510.685	380.606	539.774	463.662	459.42	450.723		5.62994	0.964127	0.953642	0.926859	0.927263	0.953843	0.956823	0.937595	0.936476	0.931141	0.959167	0.938223	0.944105	0.0136367	0.00411162
5.66835	508.854	521.057	549.975	441.43	573.807	524.776	400.866	548.377	492.379	488.45	468.589		5.66835	486.854	499.057	527.975	419.43	551.807	502.776	378.866	526.377	470.379	466.45	446.589		5.66835	0.946528	0.941278	0.937409	0.92323	0.962324	0.942005	0.933308	0.913233	0.94463	0.973844	0.929618	0.940674	0.0169277	0.00510388
5.69047	511.741	499.681	551.783	433.911	576.949	529.633	409.641	565.254	490.226	474.411	470.074		5.69047	489.741	477.681	529.783	411.911	554.949	507.633	387.641	543.254	468.226	452.411	448.074		5.69047	0.952141	0.900961	0.940619	0.90668	0.967803	0.951105	0.954925	0.942514	0.940307	0.944534	0.932709	0.939482	0.0199458	0.00601388	0.00601388
5.72888	511.602	521.685	553.75	445.028	570.803	524.045	403.879	553.458	489.515	478.826	477.01		5.72888	489.602	499.685	531.75	423.028	548.803	502.045	381.879	531.458	467.515	456.826	455.01		5.72888	0.951871	0.942463	0.944111	0.93115	0.957085	0.940635	0.940731	0.922049	0.938879	0.953751	0.947147	0.942716	0.0100877	0.00304155
5.75468	510.491	536.214	540.941	445.491	575.114	536.562	403.968	561.245	493.482	485.285	473.451		5.75468	488.491	514.214	518.941	423.491	553.114	514.562	381.968	539.245	471.482	463.285	451.451		5.75468	0.949711	0.969866	0.921369	0.932169	0.964603	0.964087	0.94095	0.935559	0.946846	0.967236	0.939739	0.948376	0.0161799	0.00487842
5.79309	493.545	527.608	559.334	439.269	573.624	510.99	401.831	559.704	501.47	484.144	473.26		5.79309	471.545	505.608	537.334	417.269	551.624	488.99	379.831	537.704	479.47	462.144	451.26		5.79309	0.916765	0.953634	0.954026	0.918474	0.962005	0.916175	0.935685	0.932885	0.962887	0.964854	0.939341	0.941521	0.0190354	0.00573938
5.81521	503.238	517.617	543.387	448.38	570.079	530.389	405.373	560.987	479.451	479.603	468.017		5.81521	481.238	495.617	521.387	426.38	548.079	508.389	383.373	538.987	457.451	457.603	446.017		5.81521	0.93561	0.93479	0.925712	0.938528	0.955822	0.952522	0.944411	0.935111	0.918668	0.955374	0.928427	0.938634	0.0122802	0.00370261	0.00370261
5.85362	503.735	529.809	543.501	436.849	572.554	535.721	397.304	554.833	500.546	478.325	479.293		5.85362	481.735	507.809	521.501	414.849	550.554	513.721	375.304	532.833	478.546	456.325	457.293		5.85362	0.936576	0.957786	0.925915	0.913147	0.960139	0.962512	0.924533	0.924434	0.961032	0.952705	0.951899	0.942789	0.0181692	0.00547821
5.87942	508.067	521.39	547.496	439.664	571.019	528.267	404.799	559.981	497.797	481.067	467.451		5.87942	486.067	499.39	525.496	417.664	549.019	506.267	382.799	537.981	475.797	459.067	445.451		5.87942	0.944998	0.941906	0.933008	0.919343	0.957462	0.948546	0.942997	0.933366	0.955511	0.95843	0.927249	0.942074	0.0127698	0.00385023
5.91783	503.746	529.415	551.812	450.909	579.557	521.143	404.03	556.945	493.364	482.979	465.129		5.91783	481.746	507.415	529.812	428.909	557.557	499.143	382.03	534.945	471.364	460.979	443.129		5.91783	0.936598	0.957043	0.940671	0.944095	0.972352	0.935198	0.941102	0.928098	0.946609	0.962422	0.922416	0.944237	0.0147986	0.00446194
5.93995	501.858	526.191	563.477	442.972	565.392	527.097	407.675	557.658	498.132	474.763	464.606		5.93995	479.858	504.191	541.477	420.972	543.392	505.097	385.675	535.658	476.132	452.763	442.606		5.93995	0.932927	0.950962	0.961382	0.926625	0.947649	0.946354	0.950082	0.929335	0.956184	0.945269	0.921327	0.942554	0.0129889	0.00391629	0.00391629
5.97836	509.15	537.618	557.586	440.253	567.216	518.056	414.752	559.008	497.01	483.242	470.32		5.97836	487.15	515.618	535.586	418.253	545.216	496.056	392.752	537.008	475.01	461.242	448.32		5.97836	0.947104	0.972514	0.950922	0.92064	0.95083	0.929414	0.967515	0.931677	0.953931	0.962971	0.933221	0.94734	0.0168301	0.00507445
6.00416	497.21	530.161	545.249	443.133	576.865	518.424	402.362	551.178	491.312	475.631	476.697		6.00416	475.21	508.161	523.249	421.133	554.865	496.424	380.362	529.178	469.312	453.631	454.697		6.00416	0.92389	0.95845	0.929018	0.926979	0.967657	0.930104	0.936994	0.918093	0.942488	0.947081	0.946496	0.938841	0.0152499	0.00459801
6.04257	500.261	528.015	550.072	446.597	570.43	526.721	416.485	561.49	502.813	473.29	476.855		6.04257	478.261	506.015	528.072	424.597	548.43	504.721	394.485	539.49	480.813	451.29	454.855		6.04257	0.929822	0.954402	0.937581	0.934604	0.956435	0.945649	0.971784	0.935984	0.965584	0.942193	0.946824	0.947351	0.0133636	0.00402929
6.06469	502.449	529.414	544.118	441.343	562.719	525.258	407.672	553.313	492.61	472.772	479.389		6.06469	480.449	507.414	522.118	419.343	540.719	503.258	385.672	531.313	470.61	450.772	457.389		6.06469	0.934076	0.957041	0.92701	0.923039	0.942987	0.942908	0.950074	0.921797	0.945094	0.941112	0.952099	0.939749	0.0118533	0.0035739	0.0035739
6.1031	504.113	525.275	550.344	440.916	592.789	530.926	411.213	568.195	498.301	482.093	469.512		6.1031	482.113	503.275	528.344	418.916	570.789	508.926	389.213	546.195	476.301	460.093	447.512		6.1031	0.937311	0.949234	0.938064	0.922099	0.995428	0.953528	0.958797	0.947616	0.956523	0.960572	0.931539	0.950065	0.0193307	0.00582844
6.1289	498.111	522.522	543.984	447.117	584.591	531.078	406.805	562.378	502.771	475.418	476.098		6.1289	476.111	500.522	521.984	425.117	562.591	509.078	384.805	540.378	480.771	453.418	454.098		6.1289	0.925642	0.944042	0.926772	0.935748	0.981131	0.953812	0.947939	0.937524	0.9655	0.946636	0.945249	0.946363	0.0162593	0.00490236
6.16731	512.644	533.457	551.125	443.061	585.491	519.006	414.144	569.325	500.895	487.571	477.915		6.16731	490.644	511.457	529.125	421.061	563.491	497.006	392.144	547.325	478.895	465.571	455.915		6.16731	0.953897	0.964666	0.939451	0.926821	0.9827	0.931194	0.966018	0.949577	0.961733	0.972009	0.949031	0.954281	0.0172624	0.00520481
6.18943	506.038	529.038	542.375	446.158	568.99	517.68	408.086	564.537	501.051	477.223	479.263		6.18943	484.038	507.038	520.375	424.158	546.99	495.68	386.086	542.537	479.051	455.223	457.263		6.18943	0.941054	0.956331	0.923915	0.933638	0.953923	0.92871	0.951094	0.94127	0.962046	0.950405	0.951837	0.944929	0.0121662	0.00366823	0.00366823
6.22784	513.375	526.343	543.92	445.44	569.228	529.025	411.823	573.276	503.141	480.497	473.771		6.22784	491.375	504.343	521.92	423.44	547.228	507.025	389.823	551.276	481.141	458.497	451.771		6.22784	0.955318	0.951248	0.926658	0.932057	0.954338	0.949966	0.9603	0.956432	0.966243	0.95724	0.940405	0.950019	0.0121293	0.00365714
6.25365	512.747	525.651	550.458	444.146	571.416	515.449	402.766	567.385	488.681	491.161	478.394		6.25365	490.747	503.651	528.458	422.146	549.416	493.449	380.766	545.385	466.681	469.161	456.394		6.25365	0.954097	0.949943	0.938267	0.929209	0.958154	0.92453	0.937989	0.946211	0.937204	0.979504	0.950028	0.945921	0.0152047	0.00458439
6.29206	511.503	522.958	553.3	460.276	579.585	522.658	408.07	555.71	499.859	485.59	468.838		6.29206	489.503	500.958	531.3	438.276	557.585	500.658	386.07	533.71	477.859	463.59	446.838		6.29206	0.951679	0.944864	0.943312	0.964713	0.9724	0.938037	0.951055	0.925956	0.959652	0.967873	0.930136	0.949971	0.0152372	0.00459418
6.31417	503.356	528.887	549.257	443.937	567.201	527.292	402.246	558.183	499.613	482.844	477.259		6.31417	481.356	506.887	527.257	421.937	545.201	505.292	380.246	536.183	477.613	460.844	455.259		6.31417	0.935839	0.956047	0.936134	0.928749	0.950803	0.946719	0.936708	0.930246	0.959158	0.96214	0.947665	0.944564	0.0117088	0.00353035	0.00353035
6.35258	509.871	527.728	551.195	446.058	570.483	529.331	412.785	566.005	492.521	480.344	473.049		6.35258	487.871	505.728	529.195	424.058	548.483	507.331	390.785	544.005	470.521	458.344	451.049		6.35258	0.948506	0.953861	0.939575	0.933417	0.956527	0.950539	0.96267	0.943817	0.944916	0.956921	0.938902	0.94815	0.00895383	0.00269968
6.38023	499.736	518.992	550.007	444.701	572.857	523.16	408.177	559.544	489.022	493.686	483.39		6.38023	477.736	496.992	528.007	422.701	550.857	501.16	386.177	537.544	467.022	471.686	461.39		6.38023	0.928801	0.937384	0.937466	0.93043	0.960667	0.938977	0.951318	0.932607	0.937889	0.984776	0.960428	0.945522	0.0171241	0.00516312
6.41864	502.289	524.795	551.22	436.705	580.116	521.409	409.518	561.052	504.705	483.051	479.693		6.41864	480.289	502.795	529.22	414.705	558.116	499.409	387.518	539.052	482.705	461.051	457.693		6.41864	0.933765	0.948329	0.939619	0.91283	0.973326	0.935697	0.954622	0.935224	0.969384	0.962572	0.952732	0.9471	0.0178687	0.00538761
6.44076	507.439	531.466	548.753	450.887	578.925	526.233	412.491	560.706	490.905	482.935	479.659		6.44076	485.439	509.466	526.753	428.887	556.925	504.233	390.491	538.706	468.905	460.935	457.659		6.44076	0.943777	0.960911	0.935239	0.944047	0.971249	0.944735	0.961946	0.934623	0.94167	0.96233	0.952661	0.95029	0.0122354	0.00368912	0.00368912
6.47917	522.895	527.221	547.448	447.921	573.83	517.393	406.142	550.776	495.234	478.682	478.673		6.47917	500.895	505.221	525.448	425.921	551.83	495.393	384.142	528.776	473.234	456.682	456.673		6.47917	0.973827	0.952904	0.932922	0.937518	0.962364	0.928172	0.946305	0.917395	0.950364	0.953451	0.950609	0.945985	0.0160146	0.00482859
6.50497	504.616	519.603	548.913	447.953	576.374	521.184	410.373	561.521	502.481	472.379	474.712		6.50497	482.616	497.603	526.913	425.953	554.374	499.184	388.373	539.521	480.481	450.379	452.712		6.50497	0.938289	0.938536	0.935523	0.937589	0.966801	0.935275	0.956728	0.936037	0.964918	0.940291	0.942364	0.944759	0.0120186	0.00362375
6.54338	509.868	523.447	542.958	451.859	575.312	523.825	410.528	557.212	501.862	483.533	475.348		6.54338	487.868	501.447	520.958	429.859	553.312	501.825	388.528	535.212	479.862	461.533	453.348		6.54338	0.9485	0.945786	0.92495	0.946186	0.964949	0.940223	0.95711	0.928561	0.963675	0.963578	0.943688	0.947928	0.0136206	0.00410678
6.5655	501.798	510.423	561.566	440.98	572.864	517.284	407.049	566.396	484.757	480.606	483.21		6.5655	479.798	488.423	539.566	418.98	550.864	495.284	385.049	544.396	462.757	458.606	461.21		6.5655	0.93281	0.921221	0.957989	0.92224	0.960679	0.927968	0.94854	0.944495	0.929324	0.957468	0.960053	0.942072	0.0157572	0.00475097	0.00475097
6.60391	505.872	530.992	555.889	451.234	568.455	513.633	418.441	562.238	501.689	486.037	486.205		6.60391	483.872	508.992	533.889	429.234	546.455	491.633	396.441	540.238	479.689	464.037	464.205		6.60391	0.940731	0.960017	0.947909	0.944811	0.95299	0.921127	0.976603	0.937281	0.963327	0.968806	0.966287	0.952717	0.0162633	0.00490358
6.62971	508.185	529.398	549.498	448.673	571.3	531.652	414.983	549.631	494.974	474.807	483.6		6.62971	486.185	507.398	527.498	426.673	549.3	509.652	392.983	527.631	472.974	452.807	461.6		6.62971	0.945228	0.95701	0.936562	0.939173	0.957952	0.954888	0.968084	0.915409	0.949842	0.945361	0.960865	0.948216	0.0144395	0.00435369
6.66812	506.391	524.583	557.183	440.694	565.9	528.01	413.672	566.125	503.197	481.697	481.63		6.66812	484.391	502.583	535.183	418.694	543.9	506.01	391.672	544.125	481.197	459.697	459.63		6.66812	0.94174	0.947929	0.950207	0.92161	0.948534	0.948064	0.964855	0.944025	0.966356	0.959745	0.956764	0.949984	0.012446	0.0037526
6.69024	503.306	519.977	548.068	442.345	565.653	518.162	411.878	567.294	489.845	474.63	479.388		6.69024	481.306	497.977	526.068	420.345	543.653	496.162	389.878	545.294	467.845	452.63	457.388		6.69024	0.935742	0.939241	0.934023	0.925245	0.948104	0.929613	0.960435	0.946053	0.939542	0.944991	0.952097	0.941371	0.0102505	0.00309065	0.00309065
6.72865	506.743	508.612	545.993	446.359	556.437	529.264	407.122	561.127	495.995	486.91	490.606		6.72865	484.743	486.612	523.993	424.359	534.437	507.264	385.122	539.127	473.995	464.91	468.606		6.72865	0.942424	0.917806	0.930339	0.93408	0.932031	0.950414	0.948719	0.935354	0.951892	0.970629	0.975449	0.944467	0.0173582	0.00523369
6.75446	495.286	524.226	555.227	444.733	576.633	522.983	409.965	550.948	490.001	480.282	479.022		6.75446	473.286	502.226	533.227	422.733	554.633	500.983	387.965	528.948	468.001	458.282	457.022		6.75446	0.92015	0.947256	0.946734	0.930501	0.967252	0.938646	0.955723	0.917694	0.939855	0.956791	0.951335	0.942903	0.0154573	0.00466055
6.79287	508.29	528.666	548.341	450.397	572.936	531.405	401.822	552.578	499.564	488.138	479.125		6.79287	486.29	506.666	526.341	428.397	550.936	509.405	379.822	530.578	477.564	466.138	457.125		6.79287	0.945432	0.95563	0.934508	0.942968	0.960805	0.954425	0.935663	0.920522	0.95906	0.973193	0.95155	0.948523	0.0146671	0.0044223
6.81498	504.753	520.932	547.458	450.087	573.354	521.824	402.593	557.835	503.926	484.555	484.296		6.81498	482.753	498.932	525.458	428.087	551.354	499.824	380.593	535.835	481.926	462.555	462.296		6.81498	0.938555	0.941043	0.93294	0.942286	0.961534	0.936474	0.937563	0.929642	0.96782	0.965712	0.962314	0.946898	0.0143425	0.00432443	0.00432443
6.85339	498.914	519.341	550.273	448.097	573.007	530.592	406.512	562.709	484.551	496.368	484.523		6.85339	476.914	497.341	528.273	426.097	551.007	508.592	384.512	540.709	462.551	474.368	462.523		6.85339	0.927203	0.938042	0.937938	0.937906	0.960929	0.952902	0.947217	0.938098	0.92891	0.990375	0.962786	0.947482	0.0184402	0.00555992
6.8792	498.889	518.274	540.408	448.397	586.889	532.723	410.805	558.172	500.681	479.367	477.84		6.8792	476.889	496.274	518.408	426.397	564.889	510.723	388.805	536.172	478.681	457.367	455.84		6.8792	0.927155	0.936029	0.920423	0.938566	0.985138	0.956895	0.957792	0.930227	0.961303	0.954881	0.948875	0.947026	0.0187405	0.00565049
6.91761	507.048	524.85	550.776	447.305	575.61	522.38	402.253	562.052	511.37	480.261	483.61		6.91761	485.048	502.85	528.776	425.305	553.61	500.38	380.253	540.052	489.37	458.261	461.61		6.91761	0.943017	0.948432	0.938831	0.936162	0.965468	0.937516	0.936725	0.936959	0.982769	0.956747	0.960886	0.94941	0.0153064	0.00461506
6.93972	501.779	520.54	552.87	442.297	569.543	532.111	405.473	555.405	486.183	480.132	477.513		6.93972	479.779	498.54	530.87	420.297	547.543	510.111	383.473	533.405	464.183	458.132	455.513		6.93972	0.932773	0.940303	0.942549	0.925139	0.954888	0.955748	0.944657	0.925426	0.932187	0.956478	0.948194	0.941668	0.0116297	0.00350648	0.00350648
6.97814	514.74	519.281	549.672	446.074	566.803	517.036	411.905	566.016	495.923	492.283	481.159		6.97814	492.74	497.281	527.672	424.074	544.803	495.036	389.905	544.016	473.923	470.283	459.159		6.97814	0.957972	0.937929	0.936871	0.933453	0.950109	0.927503	0.960502	0.943836	0.951748	0.981847	0.955784	0.948868	0.0153182	0.00461862
7.00394	495.775	529.709	556.176	446.05	574.079	527.359	410.538	553.187	495.412	479.406	474.732		7.00394	473.775	507.709	534.176	424.05	552.079	505.359	388.538	531.187	473.412	457.406	452.732		7.00394	0.921101	0.957597	0.948419	0.9334	0.962798	0.946844	0.957134	0.921578	0.950721	0.954962	0.942405	0.945178	0.0142495	0.00429639
7.04235	505.486	526.822	550.663	449.903	572.3	532.483	399.528	561.859	493.804	492.24	482.395		7.04235	483.486	504.822	528.663	427.903	550.3	510.483	377.528	539.859	471.804	470.24	460.395		7.04235	0.93998	0.952152	0.938631	0.941881	0.959696	0.956445	0.930012	0.936624	0.947492	0.981757	0.958357	0.949366	0.014472	0.00436346
7.06447	502.422	516.992	555.787	445.499	577.628	532.405	405.798	557.717	489.177	489.088	470.28		7.06447	480.422	494.992	533.787	423.499	555.628	510.405	383.798	535.717	467.177	467.088	448.28		7.06447	0.934023	0.933611	0.947728	0.932187	0.968988	0.956299	0.945458	0.929438	0.9382	0.975176	0.933138	0.944931	0.0156995	0.00473358	0.00473358
7.10288	499.952	528.25	552.965	450.097	569.543	533.119	413.76	567.944	498.358	480.765	486.42		7.10288	477.952	506.25	530.965	428.097	547.543	511.119	391.76	545.944	476.358	458.765	464.42		7.10288	0.929221	0.954845	0.942718	0.942308	0.954888	0.957636	0.965072	0.947181	0.956638	0.9578	0.966735	0.952276	0.0110122	0.0033203
7.12868	511.629	528.052	560.246	453.948	573.029	518.955	406.67	558.405	494.6	481.045	477.27		7.12868	489.629	506.052	538.246	431.948	551.029	496.955	384.67	536.405	472.6	459.045	455.27		7.12868	0.951923	0.954472	0.955645	0.950785	0.960967	0.931099	0.947606	0.930631	0.949091	0.958384	0.947688	0.948936	0.00989239	0.00298267
7.16709	510.43	527.626	554.45	456.104	567.656	524.219	403.609	563.509	504.327	485.062	478.857		7.16709	488.43	505.626	532.45	434.104	545.656	502.219	381.609	541.509	482.327	463.062	456.857		7.16709	0.949592	0.953668	0.945354	0.95553	0.951597	0.940961	0.940065	0.939486	0.968625	0.966771	0.950992	0.951149	0.00986844	0.00297545
7.18921	510.041	529.981	556.215	445.747	568.392	542.214	397.821	562.252	494.98	476.714	481.02		7.18921	488.041	507.981	534.215	423.747	546.392	520.214	375.821	540.252	472.98	454.714	459.02		7.18921	0.948836	0.95811	0.948488	0.932733	0.95288	0.974677	0.925807	0.937306	0.949854	0.949342	0.955494	0.948502	0.0131804	0.00397405	0.00397405
7.22762	507.957	526.894	547.373	443.061	575.757	536.406	406.158	564.593	502.417	491.262	484.655		7.22762	485.957	504.894	525.373	421.061	553.757	514.406	384.158	542.593	480.417	469.262	462.655		7.22762	0.944784	0.952288	0.932789	0.926821	0.965725	0.963795	0.946345	0.941367	0.964789	0.979715	0.963061	0.952862	0.0160424	0.00483697
7.25342	507.554	517.044	559.484	444.524	579.871	542.037	402.636	562.929	495.588	484.945	485.503		7.25342	485.554	495.044	537.484	422.524	557.871	520.037	380.636	540.929	473.588	462.945	463.503		7.25342	0.944001	0.933709	0.954292	0.930041	0.972899	0.974345	0.937668	0.93848	0.951075	0.966526	0.964826	0.951624	0.0160782	0.00484776
7.29183	516.163	524.826	555.948	453.495	572.41	521.472	406.093	570.666	495.171	485.792	478.481		7.29183	494.163	502.826	533.948	431.495	550.41	499.472	384.093	548.666	473.171	463.792	456.481		7.29183	0.960738	0.948387	0.948014	0.949787	0.959888	0.935815	0.946185	0.951903	0.950237	0.968295	0.950209	0.951769	0.00859915	0.00259274
7.31395	518.145	526.026	553.612	441.848	575.29	523.432	407.24	559.715	498.094	486.881	486.495		7.31395	496.145	504.026	531.612	419.848	553.29	501.432	385.24	537.715	476.094	464.881	464.495		7.31395	0.964592	0.950651	0.943866	0.924151	0.96491	0.939487	0.94901	0.932904	0.956108	0.970568	0.966891	0.951194	0.0150839	0.00454795	0.00454795
7.35236	513.33	537.261	558.599	440.472	572.307	537.336	399.217	564.544	495.473	481.305	479.749		7.35236	491.33	515.261	536.599	418.472	550.307	515.336	377.217	542.544	473.473	459.305	457.749		7.35236	0.955231	0.971841	0.952721	0.921122	0.959708	0.965537	0.929246	0.941282	0.950844	0.958927	0.952849	0.950846	0.0150624	0.0045415
7.38001	512.072	525.297	559.818	442.365	564.839	529.755	405.013	569.721	497.594	486.839	478.258		7.38001	490.072	503.297	537.818	420.365	542.839	507.755	383.013	547.721	475.594	464.839	456.258		7.38001	0.952785	0.949276	0.954885	0.925289	0.946684	0.951334	0.943524	0.950264	0.955103	0.970481	0.949745	0.949943	0.0106916	0.00322365
7.41842	511.888	527.892	568.028	446.791	566.893	534.816	402.506	556.237	497.358	489.609	484.226		7.41842	489.888	505.892	546.028	424.791	544.893	512.816	380.506	534.237	475.358	467.609	462.226		7.41842	0.952427	0.95417	0.969462	0.935031	0.950266	0.960816	0.937348	0.92687	0.954629	0.976264	0.962168	0.952677	0.0148952	0.00449107
7.44053	506.239	533.433	561.329	440.01	572.118	529.737	408.363	563.211	501.442	481.203	479.45		7.44053	484.239	511.433	539.329	418.01	550.118	507.737	386.363	541.211	479.442	459.203	457.45		7.44053	0.941444	0.964621	0.957568	0.920105	0.959378	0.9513	0.951777	0.938969	0.962831	0.958714	0.952226	0.950812	0.0130027	0.00392047	0.00392047
7.47895	503.873	535.82	563.189	447.678	565.728	524.504	404.547	562.703	491.292	488.119	480.627		7.47895	481.873	513.82	541.189	425.678	543.728	502.504	382.547	540.703	469.292	466.119	458.627		7.47895	0.936844	0.969123	0.96087	0.936983	0.948235	0.941495	0.942376	0.938088	0.942448	0.973153	0.954676	0.949481	0.0130913	0.00394719
7.50475	502.904	527.675	559.798	446.939	583.129	530.732	400.404	556.782	499.015	485.064	479.232		7.50475	480.904	505.675	537.798	424.939	561.129	508.732	378.404	534.782	477.015	463.064	457.232		7.50475	0.934961	0.953761	0.95485	0.935357	0.978581	0.953164	0.93217	0.927815	0.957957	0.966775	0.951772	0.949742	0.0156918	0.00473127
7.54316	508.731	520.244	547.682	451.022	576.288	522.779	401.466	562.888	502.178	488.377	487.219		7.54316	486.731	498.244	525.682	429.022	554.288	500.779	379.466	540.888	480.178	466.377	465.219		7.54316	0.946289	0.939745	0.933338	0.944344	0.966651	0.938263	0.934786	0.938409	0.964309	0.973692	0.968398	0.949839	0.0152105	0.00458615
7.56528	507.731	518.383	545.869	438.374	579.94	534.387	412.803	557.691	504.222	487.216	476.824		7.56528	485.731	496.383	523.869	416.374	557.94	512.387	390.803	535.691	482.222	465.216	454.824		7.56528	0.944345	0.936235	0.930119	0.916504	0.97302	0.960012	0.962714	0.929393	0.968414	0.971268	0.94676	0.94898	0.0193536	0.00583534	0.00583534
7.60369	510.796	521.598	557.698	445.937	580.828	527.791	413.296	558.438	502.778	477.949	485.667		7.60369	488.796	499.598	535.698	423.937	558.828	505.791	391.296	536.438	480.778	455.949	463.667		7.60369	0.950304	0.942299	0.951121	0.933151	0.974568	0.947654	0.963929	0.930689	0.965514	0.95192	0.965168	0.952392	0.0138998	0.00419096
7.62949	506.014	524.225	540.098	449.123	576.395	539.735	409.729	549.467	509.468	484.505	484.454		7.62949	484.014	502.225	518.098	427.123	554.395	517.735	387.729	527.467	487.468	462.505	462.454		7.62949	0.941007	0.947254	0.919873	0.940164	0.966837	0.970032	0.955142	0.915124	0.978949	0.965608	0.962643	0.951148	0.0206091	0.00621387
7.6679	500.728	515.213	555.559	456.811	580.851	525.493	419.076	563.583	491.318	477.834	488.605		7.6679	478.728	493.213	533.559	434.811	558.851	503.493	397.076	541.583	469.318	455.834	466.605		7.6679	0.93073	0.930256	0.947323	0.957086	0.974608	0.943348	0.978167	0.939615	0.9425	0.95168	0.971283	0.951509	0.0169015	0.00509599
7.69002	502.329	528.161	551.746	446.876	576.743	526.119	421.647	564.872	493.741	492.271	475.907		7.69002	480.329	506.161	529.746	424.876	554.743	504.119	399.647	542.872	471.741	470.271	453.907		7.69002	0.933843	0.954677	0.940553	0.935218	0.967444	0.944521	0.984501	0.941851	0.947366	0.981821	0.944851	0.952422	0.0177854	0.0053625	0.0053625
7.72843	513.942	529.979	557.993	449.186	581.463	539.354	410.883	565.72	487.539	484.279	490.404		7.72843	491.942	507.979	535.993	427.186	559.463	517.354	388.883	543.72	465.539	462.279	468.404		7.72843	0.95642	0.958106	0.951645	0.940303	0.975676	0.969318	0.957984	0.943322	0.934911	0.965136	0.975028	0.957077	0.0136992	0.00413047
7.75423	513.736	526.067	553.701	450.529	580.364	535.38	418.046	556.486	498.965	489.524	477.877		7.75423	491.736	504.067	531.701	428.529	558.364	513.38	396.046	534.486	476.965	467.524	455.877		7.75423	0.95602	0.950728	0.944024	0.943259	0.973759	0.961873	0.97563	0.927302	0.957857	0.976086	0.948952	0.955954	0.0153261	0.00462099
7.79264	514.632	530.107	552.716	453.566	583.06	526.253	399.063	563.962	497.579	493.238	477.751		7.79264	492.632	508.107	530.716	431.566	561.06	504.253	377.063	541.962	475.579	471.238	455.751		7.79264	0.957762	0.958348	0.942276	0.949944	0.978461	0.944772	0.928867	0.940272	0.955073	0.98384	0.94869	0.953482	0.0161475	0.00486866
7.81476	507.801	523.363	558.615	453.206	581.967	534.526	409.567	561.653	509.364	489.026	482.955		7.81476	485.801	501.363	536.615	431.206	559.967	512.526	387.567	539.653	487.364	467.026	460.955		7.81476	0.944481	0.945628	0.952749	0.949151	0.976555	0.960273	0.954742	0.936266	0.97874	0.975047	0.959522	0.95756	0.0141246	0.00425871	0.00425871
7.85317	514.36	524.045	551.048	449.534	578.854	525.4	409.229	558.935	501.742	490.514	478.018		7.85317	492.36	502.045	529.048	427.534	556.854	503.4	387.229	536.935	479.742	468.514	456.018		7.85317	0.957233	0.946914	0.939314	0.941069	0.971126	0.943174	0.95391	0.931551	0.963434	0.978153	0.949245	0.952284	0.0142148	0.00428592
7.87897	506.785	515.403	564.203	448.834	587.653	531.31	419.841	569.169	505.885	487.843	481.755		7.87897	484.785	493.403	542.203	426.834	565.653	509.31	397.841	547.169	483.885	465.843	459.755		7.87897	0.942506	0.930614	0.962671	0.939528	0.986471	0.954247	0.980052	0.949306	0.971754	0.972577	0.957024	0.958795	0.0177066	0.00533874
7.91738	500.758	523.766	549.213	456.189	582.489	528.646	414.519	569.019	491.648	484.701	476.805		7.91738	478.758	501.766	527.213	434.189	560.489	506.646	392.519	547.019	469.648	462.701	454.805		7.91738	0.930788	0.946388	0.936056	0.955717	0.977465	0.949256	0.966941	0.949046	0.943162	0.966017	0.94672	0.951596	0.0139215	0.00419748
7.9395	512.418	529.484	555.061	444.631	582.875	527.799	407.287	562.131	505.098	479.715	475.197		7.9395	490.418	507.484	533.061	422.631	560.875	505.799	385.287	540.131	483.098	457.715	453.197		7.9395	0.953457	0.957173	0.946439	0.930276	0.978138	0.947669	0.949126	0.937096	0.970173	0.955607	0.943373	0.951684	0.0137138	0.00413486	0.00413486
7.97791	504.066	523.286	559.845	456.763	589.642	529.674	399.907	561.835	509.236	478.679	488.6		7.97791	482.066	501.286	537.845	434.763	567.642	507.674	377.907	539.835	487.236	456.679	466.6		7.97791	0.93722	0.945483	0.954933	0.956981	0.989939	0.951182	0.930946	0.936582	0.978483	0.953444	0.971273	0.955133	0.018391	0.0055451
8.00372	508.696	526.877	545.416	452.784	567.118	530.001	406.332	560.435	502.297	486.501	476.41		8.00372	486.696	504.877	523.416	430.784	545.118	508.001	384.332	538.435	480.297	464.501	454.41		8.00372	0.946221	0.952256	0.929315	0.948222	0.950659	0.951795	0.946773	0.934153	0.964548	0.969775	0.945898	0.949056	0.0115122	0.00347107
8.04213	507.121	524.339	557.759	452.457	580.636	523.971	403.826	576.235	497.938	485.072	470.05		8.04213	485.121	502.339	535.759	430.457	558.636	501.971	381.826	554.235	475.938	463.072	448.05		8.04213	0.943159	0.947469	0.951229	0.947503	0.974233	0.940497	0.9406	0.961565	0.955794	0.966792	0.932659	0.951045	0.0125094	0.00377172
8.06424	501.257	525.462	560.262	448.26	576.112	525.172	404.268	563.085	502.972	480.774	474.096		8.06424	479.257	503.462	538.262	426.26	554.112	503.172	382.268	541.085	480.972	458.774	452.096		8.06424	0.931759	0.949587	0.955673	0.938264	0.966344	0.942747	0.941689	0.938751	0.965904	0.957818	0.941081	0.948147	0.0117218	0.00353425	0.00353425
8.10265	500.383	519.868	554.788	455.808	580.908	522.848	407.697	552.649	511.486	486.599	481.756		8.10265	478.383	497.868	532.788	433.808	558.908	500.848	385.697	530.649	489.486	464.599	459.756		8.10265	0.930059	0.939036	0.945954	0.954879	0.974708	0.938393	0.950136	0.920645	0.983002	0.96998	0.957026	0.951256	0.019197	0.00578813
8.12846	506.181	518.153	554.731	453.276	588.78	529.25	413.994	558.43	498.955	484.541	480.137		8.12846	484.181	496.153	532.731	431.276	566.78	507.25	391.994	536.43	476.955	462.541	458.137		8.12846	0.941332	0.935801	0.945853	0.949305	0.988436	0.950387	0.965648	0.930675	0.957837	0.965683	0.953656	0.953147	0.0161309	0.00486365
8.16687	512.493	519.075	559.732	460.684	580.805	527.654	417.398	565.124	495.331	483.598	485.391		8.16687	490.493	497.075	537.732	438.684	558.805	505.654	395.398	543.124	473.331	461.598	463.391		8.16687	0.953603	0.93754	0.954732	0.965611	0.974528	0.947397	0.974034	0.942288	0.950559	0.963714	0.964593	0.957145	0.012327	0.00371672
8.18898	514.676	517.958	563.502	452.272	571.946	532.525	411.796	562.071	499.679	485.159	480.962		8.18898	492.676	495.958	541.502	430.272	549.946	510.525	389.796	540.071	477.679	463.159	458.962		8.18898	0.957847	0.935433	0.961426	0.947095	0.959078	0.956524	0.960233	0.936992	0.959291	0.966973	0.955374	0.954206	0.0101013	0.00304565	0.00304565
8.2274	510.247	512.885	554.894	455.214	579.166	525.432	403.366	577.472	502.515	483.371	476.636		8.2274	488.247	490.885	532.894	433.214	557.166	503.432	381.366	555.472	480.515	461.371	454.636		8.2274	0.949237	0.925865	0.946143	0.953571	0.97167	0.943234	0.939467	0.963711	0.964986	0.96324	0.946369	0.95159	0.0134546	0.00405672
8.25504	509.549	524.591	553.657	450.857	584.446	520.797	413.311	564.645	496.189	482.859	480.894		8.25504	487.549	502.591	531.657	428.857	562.446	498.797	391.311	542.645	474.189	460.859	458.894		8.25504	0.94788	0.947944	0.943946	0.943981	0.980878	0.93455	0.963966	0.941457	0.952282	0.962171	0.955232	0.952208	0.0129184	0.00389506
8.29345	516.971	519.973	559.73	457.617	570.626	528.185	409.01	567.211	492.092	480.347	479.953		8.29345	494.971	497.973	537.73	435.617	548.626	506.185	387.01	545.211	470.092	458.347	457.953		8.29345	0.962309	0.939234	0.954729	0.958861	0.956776	0.948392	0.95337	0.945909	0.944054	0.956927	0.953273	0.952167	0.0069807	0.00210476
8.31557	513.717	515.916	560.031	451.312	577.415	516.264	396.464	568.136	504.762	478.262	471.36		8.31557	491.717	493.916	538.031	429.312	555.415	494.264	374.464	546.136	482.762	456.262	449.36		8.31557	0.955983	0.931582	0.955263	0.944982	0.968616	0.926057	0.922464	0.947514	0.969498	0.952574	0.935386	0.946356	0.0160202	0.00483028	0.00483028
8.35398	496.986	519.834	558.518	450.557	586.942	533.298	403.997	576.931	502.05	480.058	487.759		8.35398	474.986	497.834	536.518	428.557	564.942	511.298	381.997	554.931	480.05	458.058	465.759		8.35398	0.923455	0.938972	0.952577	0.94332	0.985231	0.957972	0.941021	0.962773	0.964052	0.956323	0.969522	0.954111	0.0169077	0.00509788
8.37978	514.435	524.24	548.171	450.707	585.961	519.494	402.496	574.857	506.841	484.396	484.972		8.37978	492.435	502.24	526.171	428.707	563.961	497.494	380.496	552.857	484.841	462.396	462.972		8.37978	0.957379	0.947282	0.934206	0.943651	0.98352	0.932109	0.937324	0.959175	0.973674	0.96538	0.963721	0.954311	0.0167958	0.00506412
8.41819	507.575	519.078	555.776	446.247	573.526	530.382	412.113	565.207	506.938	491.924	476.816		8.41819	485.575	497.078	533.776	424.247	551.526	508.382	390.113	543.207	484.938	469.924	454.816		8.41819	0.944042	0.937546	0.947709	0.933833	0.961834	0.952508	0.961014	0.942432	0.973868	0.981097	0.946743	0.952966	0.0149422	0.00450524
8.44031	505.583	517.148	550.801	448.709	577.323	521.897	412.981	566.415	491.668	487.527	485.512		8.44031	483.583	495.148	528.801	426.709	555.323	499.897	390.981	544.415	469.668	465.527	463.512		8.44031	0.940169	0.933906	0.938876	0.939253	0.968456	0.936611	0.963153	0.944528	0.943203	0.971917	0.964845	0.949538	0.0143608	0.00432995	0.00432995
8.47872	510.758	527.213	559.459	449.776	562.678	527.48	402.627	562.183	502.566	484.908	483.535		8.47872	488.758	505.213	537.459	427.776	540.678	505.48	380.627	540.183	480.566	462.908	461.535		8.47872	0.95023	0.952889	0.954248	0.941601	0.942915	0.947071	0.937646	0.937186	0.965088	0.966449	0.96073	0.95055	0.0104048	0.00313715
8.50452	511.259	517.81	553.831	451.64	582.114	522.766	412.177	558.785	498.602	475.954	481.213		8.50452	489.259	495.81	531.831	429.64	560.114	500.766	390.177	536.785	476.602	453.954	459.213		8.50452	0.951204	0.935154	0.944255	0.945704	0.976811	0.938239	0.961172	0.931291	0.957128	0.947755	0.955896	0.94951	0.0130126	0.00392344
8.54294	511.427	515.696	545.521	445.06	576.104	534.246	413.887	557.913	502.772	473.042	480.129		8.54294	489.427	493.696	523.521	423.06	554.104	512.246	391.887	535.913	480.772	451.042	458.129		8.54294	0.951531	0.931167	0.929501	0.931221	0.96633	0.959748	0.965384	0.929778	0.965502	0.941676	0.95364	0.947771	0.0155093	0.00467624
8.56505	508.718	513.537	549.49	447.177	571.24	521.354	405.548	564.344	503.579	474.887	476.308		8.56505	486.718	491.537	527.49	425.177	549.24	499.354	383.548	542.344	481.579	452.887	454.308		8.56505	0.946264	0.927095	0.936548	0.93588	0.957847	0.935593	0.944842	0.940935	0.967123	0.945528	0.945686	0.94394	0.0110665	0.00333668	0.00333668
8.60346	506.97	516.732	549.673	454.295	586.658	530.858	413.346	567.928	497.479	486.379	480.342		8.60346	484.97	494.732	527.673	432.295	564.658	508.858	391.346	545.928	475.479	464.379	458.342		8.60346	0.942866	0.933121	0.936873	0.951548	0.984735	0.9534	0.964052	0.947153	0.954872	0.96952	0.954083	0.953839	0.0148107	0.00446559
8.62927	501.634	514.478	557.136	445.479	568.629	531.683	408.196	567.728	493.008	483.371	477.302		8.62927	479.634	492.478	535.136	423.479	546.629	509.683	386.196	545.728	471.008	461.371	455.302		8.62927	0.932491	0.92887	0.950123	0.932143	0.953294	0.954946	0.951365	0.946806	0.945894	0.96324	0.947755	0.946084	0.0107138	0.00323033
8.66768	511.295	523.584	551.088	453.705	575.339	519.739	409.757	567.643	500.995	479.914	476.061		8.66768	489.295	501.584	529.088	431.705	553.339	497.739	387.757	545.643	478.995	457.914	454.061		8.66768	0.951274	0.946045	0.939385	0.95025	0.964996	0.932568	0.955211	0.946659	0.961933	0.956023	0.945172	0.949956	0.00948182	0.00285888
8.68979	515.988	519.079	546.632	444.176	586.931	527.484	410.896	563.163	508.838	491.447	481.017		8.68979	493.988	497.079	524.632	422.176	564.931	505.484	388.896	541.163	486.838	469.447	459.017		8.68979	0.960398	0.937548	0.931474	0.929275	0.985211	0.947079	0.958016	0.938886	0.977684	0.980101	0.955488	0.954651	0.0198413	0.00598237	0.00598237
8.7282	514.883	521.73	552.939	446.818	576.812	520.458	408.066	566.01	501.515	494.391	489.55		8.7282	492.883	499.73	530.939	424.818	554.812	498.458	386.066	544.01	479.515	472.391	467.55		8.7282	0.95825	0.942548	0.942672	0.93509	0.967564	0.933915	0.951045	0.943826	0.962978	0.986248	0.97325	0.954308	0.0168072	0.00506757
8.75401	510.554	528.69	550.469	457.776	573.653	524.893	396.299	570.831	492.515	470.682	491.148		8.75401	488.554	506.69	528.469	435.776	551.653	502.893	374.299	548.831	470.515	448.682	469.148		8.75401	0.949834	0.955675	0.938286	0.959211	0.962055	0.942224	0.922058	0.95219	0.944904	0.936748	0.976577	0.949069	0.0146424	0.00441486
8.79242	512.755	531.413	552.223	448.1	583.582	536.385	399.099	575.639	493.102	480.267	479.952		8.79242	490.755	509.413	530.223	426.1	561.582	514.385	377.099	553.639	471.102	458.267	457.952		8.79242	0.954113	0.960811	0.9414	0.937912	0.979371	0.963756	0.928955	0.960531	0.946082	0.95676	0.953271	0.952997	0.0139014	0.00419143
8.81454	511.634	520.514	541.579	450.565	579.424	518.182	406.772	558.998	508.194	474.742	482.369		8.81454	489.634	498.514	519.579	428.565	557.424	496.182	384.772	536.998	486.194	452.742	460.369		8.81454	0.951933	0.940254	0.922502	0.943338	0.97212	0.92965	0.947857	0.93166	0.976391	0.945225	0.958302	0.947203	0.0168692	0.00508626	0.00508626
8.85295	516.947	521.809	545.028	450.228	575.984	517.192	416.057	573.408	497.847	481.931	477.051		8.85295	494.947	499.809	523.028	428.228	553.984	495.192	394.057	551.408	475.847	459.931	455.051		8.85295	0.962263	0.942697	0.928626	0.942596	0.96612	0.927796	0.97073	0.956661	0.955611	0.960234	0.947232	0.950961	0.0144088	0.00434441
8.87875	509.03	525.798	545.309	446.633	573.436	523.38	418.625	572.3	493.15	481.689	484.546		8.87875	487.03	503.798	523.309	424.633	551.436	501.38	396.625	550.3	471.15	459.689	462.546		8.87875	0.946871	0.95022	0.929125	0.934683	0.961677	0.939389	0.977056	0.954738	0.946179	0.959729	0.962834	0.951136	0.0139406	0.00420326
8.91716	507.806	525.032	549.835	447.499	573.957	516.442	414.854	568.518	499.237	496.672	484.549		8.91716	485.806	503.032	527.835	425.499	551.957	494.442	392.854	546.518	477.237	474.672	462.549		8.91716	0.944491	0.948776	0.93716	0.936589	0.962585	0.92639	0.967767	0.948177	0.958403	0.99101	0.96284	0.953108	0.017951	0.00541242
8.93928	505.614	521.522	543.992	447.136	577.047	529.614	409.833	560.882	505.098	488.132	481.643		8.93928	483.614	499.522	521.992	425.136	555.047	507.614	387.833	538.882	483.098	466.132	459.643		8.93928	0.940229	0.942155	0.926786	0.93579	0.967974	0.951069	0.955398	0.934929	0.970173	0.97318	0.956791	0.950407	0.0157063	0.00473562	0.00473562
8.97769	509.278	519.328	558.057	451.194	583.051	521.822	414.344	574.866	504.479	481.244	483.923		8.97769	487.278	497.328	536.057	429.194	561.051	499.822	392.344	552.866	482.479	459.244	461.923		8.97769	0.947353	0.938017	0.951758	0.944723	0.978445	0.93647	0.96651	0.95919	0.96893	0.9588	0.961537	0.955612	0.0132408	0.00399225
9.00349	503.171	530.632	550.521	446.836	568.755	533.215	410.818	565.162	495.588	479.134	486.112		9.00349	481.171	508.632	528.521	424.836	546.755	511.215	388.818	543.162	473.588	457.134	464.112		9.00349	0.93548	0.959338	0.938378	0.93513	0.953513	0.957816	0.957824	0.942354	0.951075	0.954394	0.966094	0.950127	0.0106143	0.00320033
9.0297	506.499	521.35	549.214	448.873	570.311	533.148	414.649	568.968	512.052	482.556	475.293		9.0297	484.499	499.35	527.214	426.873	548.311	511.148	392.649	546.968	490.052	460.556	453.293		9.0297	0.94195	0.941831	0.936058	0.939614	0.956227	0.957691	0.967262	0.948957	0.984138	0.961539	0.943573	0.952622	0.0144743	0.00436415
9.06811	506.825	521.388	541.479	450.208	570.075	531.796	415.345	570.894	502.5	479.84	488.153		9.06811	484.825	499.388	519.479	428.208	548.075	509.796	393.345	548.894	480.5	457.84	466.153		9.06811	0.942584	0.941903	0.922325	0.942552	0.955815	0.955158	0.968976	0.952299	0.964956	0.955868	0.970342	0.952071	0.0141157	0.00425604	0.00425604
9.09023	510.379	518.344	552.539	442.138	585.969	521.117	406.944	578.477	508.659	489.217	482.392		9.09023	488.379	496.344	530.539	420.138	563.969	499.117	384.944	556.477	486.659	467.217	460.392		9.09023	0.949493	0.936161	0.941961	0.924789	0.983534	0.935149	0.948281	0.965455	0.977324	0.975445	0.95835	0.954177	0.0193669	0.00583935
9.12864	507.708	525.078	557.92	450.332	585.83	537.783	410.923	577.532	499.077	476.145	497.064		9.12864	485.708	503.078	535.92	428.332	563.83	515.783	388.923	555.532	477.077	454.145	475.064		9.12864	0.9443	0.948862	0.951515	0.942825	0.983291	0.966375	0.958083	0.963816	0.958082	0.948154	0.988891	0.959472	0.0152135	0.00458705
9.15444	509.395	530.983	562.916	450.724	580.975	514.681	421.609	570.263	512.701	491.16	488.292		9.15444	487.395	508.983	540.916	428.724	558.975	492.681	399.609	548.263	490.701	469.16	466.292		9.15444	0.94758	0.96	0.960385	0.943688	0.974825	0.923091	0.984407	0.951204	0.985442	0.979502	0.970632	0.961887	0.0194347	0.00585979
9.19285	504.193	524.834	554.422	456.634	569.449	519.543	413.565	566.63	502.831	490.551	484.872		9.19285	482.193	502.834	532.422	434.634	547.449	497.543	391.565	544.63	480.831	468.551	462.872		9.19285	0.937467	0.948402	0.945305	0.956697	0.954724	0.9322	0.964591	0.944901	0.965621	0.978231	0.963513	0.953786	0.0136763	0.00412357	0.00412357
9.21497	509.308	515.906	558.987	444.478	560.589	517.735	407.727	565.607	498.873	493.429	475.345		9.21497	487.308	493.906	536.987	422.478	538.589	495.735	385.727	543.607	476.873	471.429	453.345		9.21497	0.947411	0.931563	0.95341	0.92994	0.939272	0.928813	0.95021	0.943126	0.957672	0.984239	0.943681	0.946303	0.0157884	0.00476037
9.25338	518.799	525.79	548.464	451.983	577.585	522.306	414.277	572.544	496.962	483.929	477.166		9.25338	496.799	503.79	526.464	429.983	555.585	500.306	392.277	550.544	474.962	461.929	455.166		9.25338	0.965863	0.950205	0.934726	0.946459	0.968913	0.937377	0.966345	0.955162	0.953834	0.964405	0.947472	0.953706	0.0117724	0.00354951
9.27918	511.708	525.91	562.583	451.526	581.829	516.431	404.583	568.634	498.293	492.284	472.521		9.27918	489.708	503.91	540.583	429.526	559.829	494.431	382.583	546.634	476.293	470.284	450.521		9.27918	0.952077	0.950432	0.959794	0.945453	0.976314	0.92637	0.942465	0.948378	0.956507	0.981849	0.937803	0.952495	0.016026	0.00483201
9.31759	498.298	526.522	550.442	452.702	569.256	517.023	407.111	578.694	490.648	479.918	484.986		9.31759	476.298	504.522	528.442	430.702	547.256	495.023	385.111	556.694	468.648	457.918	462.986		9.31759	0.926006	0.951586	0.938238	0.948042	0.954387	0.927479	0.948692	0.965832	0.941154	0.956031	0.96375	0.947382	0.0131433	0.00396287	0.00396287
9.33971	509.211	519.747	557.853	455.233	577.468	527.985	404.75	578.18	496.968	473.841	480.963		9.33971	487.211	497.747	535.853	433.233	555.468	505.985	382.75	556.18	474.968	451.841	458.963		9.33971	0.947222	0.938808	0.951396	0.953613	0.968708	0.948017	0.942876	0.96494	0.953846	0.943344	0.955376	0.95165	0.00913199	0.0027534
9.37812	501.365	525.483	551.673	453.85	572.376	532.408	410.93	570.704	494.077	490.827	482.436		9.37812	479.365	503.483	529.673	431.85	550.376	510.408	388.93	548.704	472.077	468.827	460.436		9.37812	0.931969	0.949626	0.940424	0.950569	0.959828	0.956304	0.9581	0.951969	0.94804	0.978807	0.958442	0.953098	0.0119268	0.00359607
9.40392	505.152	532.142	558.376	452.362	569.783	539.31	409.348	580.067	500.692	475.803	483.033		9.40392	483.152	510.142	536.376	430.362	547.783	517.31	387.348	558.067	478.692	453.803	461.033		9.40392	0.939331	0.962186	0.952325	0.947293	0.955306	0.969236	0.954203	0.968214	0.961325	0.94744	0.959685	0.956049	0.00921239	0.00277764
9.44234	498.186	533.712	559.816	445.471	570.079	516.441	414.647	569.087	500.831	476.413	486.323		9.44234	476.186	511.712	537.816	423.471	548.079	494.441	392.647	547.087	478.831	454.413	464.323		9.44234	0.925788	0.965147	0.954881	0.932125	0.955822	0.926388	0.967257	0.949164	0.961604	0.948714	0.966533	0.950311	0.0156763	0.00472659	0.00472659
9.46445	512.738	528.051	562.531	457.54	565.208	539.036	416.507	562.651	496.183	483.787	481.937		9.46445	490.738	506.051	540.531	435.54	543.208	517.036	394.507	540.651	474.183	461.787	459.937		9.46445	0.95408	0.95447	0.959702	0.958691	0.947328	0.968723	0.971839	0.937998	0.95227	0.964109	0.957403	0.956965	0.00954144	0.00287685
9.50286	505.114	531.794	561.849	447.417	576.874	518.906	409.192	573.189	497.247	480.291	493.186		9.50286	483.114	509.794	539.849	425.417	554.874	496.906	387.192	551.189	475.247	458.291	471.186		9.50286	0.939257	0.96153	0.958491	0.936409	0.967673	0.931007	0.953819	0.956281	0.954407	0.95681	0.980819	0.954227	0.0143223	0.00431833
9.52867	510.064	527.198	562.627	449.443	566.921	530.711	410.788	574.106	490.608	490.677	482.871		9.52867	488.064	505.198	540.627	427.443	544.921	508.711	388.788	552.106	468.608	468.677	460.871		9.52867	0.948881	0.952861	0.959872	0.940868	0.950315	0.953125	0.95775	0.957872	0.941074	0.978494	0.959347	0.954587	0.0103424	0.00311835
9.56708	506.68	530.337	555.699	444.66	573.4	531.128	410.158	566.115	504.837	474.739	490.928		9.56708	484.68	508.337	533.699	422.66	551.4	509.128	388.158	544.115	482.837	452.739	468.928		9.56708	0.942302	0.958782	0.947572	0.93034	0.961614	0.953906	0.956198	0.944008	0.969649	0.945219	0.976119	0.953246	0.0131472	0.00396402	0.00396402
9.58919	509.663	530.897	558.988	445.522	570.008	520.578	413.23	568.435	494.617	478.104	482.039		9.58919	487.663	508.897	536.988	423.522	548.008	498.578	391.23	546.435	472.617	456.104	460.039		9.58919	0.948101	0.959838	0.953411	0.932238	0.955699	0.93414	0.963766	0.948033	0.949125	0.952244	0.957615	0.950383	0.00983421	0.00296512
9.6276	507.803	529.325	568.197	458.06	579.395	521.221	404.809	574.399	492.975	489.149	485.36		9.6276	485.803	507.325	546.197	436.06	557.395	499.221	382.809	552.399	470.975	467.149	463.36		9.6276	0.944485	0.956873	0.969762	0.959836	0.972069	0.935344	0.943022	0.95838	0.945827	0.975303	0.964528	0.956857	0.0131803	0.003974
9.65341	513.556	523.315	553.609	450.019	579.029	535.602	401.891	570.609	500.474	487.436	484.439		9.65341	491.556	501.315	531.609	428.019	557.029	513.602	379.891	548.609	478.474	465.436	462.439		9.65341	0.95567	0.945537	0.943861	0.942136	0.971431	0.962289	0.935833	0.951805	0.960887	0.971727	0.962611	0.95489	0.0120518	0.00363377
9.69182	507.63	533.142	565.78	460.654	571.754	516.937	399.507	569.68	504.036	490.653	481.654		9.69182	485.63	511.142	543.78	438.654	549.754	494.937	377.507	547.68	482.036	468.653	459.654		9.69182	0.944149	0.964072	0.96547	0.965545	0.958744	0.927318	0.92996	0.950193	0.96804	0.978443	0.956814	0.955341	0.0160405	0.00483638	0.00483638
9.71394	517.056	528.617	555.927	458.125	582.418	531.037	396.182	578.334	496.838	483.864	482.632		9.71394	495.056	506.617	533.927	436.125	560.418	509.037	374.182	556.334	474.838	461.864	460.632		9.71394	0.962475	0.955537	0.947977	0.959979	0.977341	0.953736	0.92177	0.965207	0.953585	0.96427	0.95885	0.95643	0.0138553	0.00417754
9.75235	513.51	544.393	558.916	456.3	579.155	518.845	398.78	568.4	498.731	479.93	478.013		9.75235	491.51	522.393	536.916	434.3	557.155	496.845	376.78	546.4	476.731	457.93	456.013		9.75235	0.95558	0.985293	0.953284	0.955962	0.971651	0.930893	0.92817	0.947972	0.957387	0.956056	0.949235	0.953771	0.0160405	0.00483638
9.77999	506.557	533.332	550.394	444.46	585.546	519.294	401.614	578.068	489.789	485.818	473.119		9.77999	484.557	511.332	528.394	422.46	563.546	497.294	379.614	556.068	467.789	463.818	451.119		9.77999	0.942063	0.96443	0.938153	0.9299	0.982796	0.931734	0.935151	0.964745	0.939429	0.968349	0.939048	0.948709	0.0179243	0.00540439
9.8184	506.283	537.94	561.258	452.538	581.76	520.558	412.006	583.059	511.66	484.324	472.4		9.8184	484.283	515.94	539.258	430.538	559.76	498.558	390.006	561.059	489.66	462.324	450.4		9.8184	0.94153	0.973122	0.957442	0.947681	0.976194	0.934102	0.960751	0.973405	0.983351	0.96523	0.937551	0.959123	0.0168906	0.00509272	0.00509272
9.84052	509.735	527.02	553.109	454.565	580.717	516.177	402.218	569.464	503.701	483.499	482.593		9.84052	487.735	505.02	531.109	432.565	558.717	494.177	380.218	547.464	481.701	461.499	460.593		9.84052	0.948241	0.952525	0.942973	0.952143	0.974375	0.925894	0.936639	0.949818	0.967368	0.963507	0.958769	0.952023	0.0139039	0.00419219
9.87893	513.955	523.813	548.469	451.035	587.709	519.594	407.76	578.05	498.596	493.175	485.086		9.87893	491.955	501.813	526.469	429.035	565.709	497.594	385.76	556.05	476.596	471.175	463.086		9.87893	0.956446	0.946477	0.934735	0.944373	0.986568	0.932296	0.950291	0.964714	0.957116	0.983709	0.963958	0.956426	0.0176451	0.00532019
9.90473	515.768	528.969	551.901	455.681	579.746	525.896	404.285	575.326	496.095	481.412	472.93		9.90473	493.768	506.969	529.901	433.681	557.746	503.896	382.285	553.326	474.095	459.412	450.93		9.90473	0.95997	0.956201	0.940829	0.954599	0.972681	0.944103	0.941731	0.959988	0.952093	0.95915	0.938654	0.952727	0.0104666	0.0031558
9.94315	502.92	532.289	549.237	452.6	585.431	535.698	405.431	569.536	494.237	483.632	483.026		9.94315	480.92	510.289	527.237	430.6	563.431	513.698	383.431	547.536	472.237	461.632	461.026		9.94315	0.934992	0.962463	0.936099	0.947817	0.982596	0.962468	0.944554	0.949943	0.948362	0.963785	0.95967	0.953886	0.0139509	0.00420636	0.00420636
9.96526	511.202	530.516	558.869	452.801	584.78	530.239	407.909	569.234	504.383	477.725	474.471		9.96526	489.202	508.516	536.869	430.801	562.78	508.239	385.909	547.234	482.383	455.725	452.471		9.96526	0.951093	0.959119	0.9532	0.94826	0.98146	0.95224	0.950658	0.949419	0.968737	0.951453	0.941862	0.955227	0.0110091	0.00331936
10.0037	504.53	528.755	561.101	450.476	596.229	530.804	409.654	571.281	499.545	484.897	476.154		10.0037	482.53	506.755	539.101	428.476	574.229	508.804	387.654	549.281	477.545	462.897	454.154		10.0037	0.938122	0.955798	0.957163	0.943142	1.00143	0.953299	0.954957	0.95297	0.959021	0.966426	0.945365	0.957063	0.0166913	0.00503263
10.0295	508.308	541.429	553.78	453.673	581.8	517.954	408.928	572.717	500.27	473.472	476.47		10.0295	486.308	519.429	531.78	431.673	559.8	495.954	386.928	550.717	478.27	451.472	454.47		10.0295	0.945467	0.979702	0.944165	0.950179	0.976263	0.929223	0.953168	0.955462	0.960477	0.942573	0.946023	0.952973	0.0147705	0.00445348
10.0679	518.43	532.018	555.423	456.152	583.746	507.233	403.67	560.404	501.476	486.131	470.841		10.0679	496.43	510.018	533.423	434.152	561.746	485.233	381.67	538.404	479.476	464.131	448.841		10.0679	0.965146	0.961952	0.947082	0.955636	0.979657	0.909136	0.940216	0.934099	0.962899	0.969003	0.934306	0.95083	0.0201908	0.00608776	0.00608776
10.09	513.763	532.811	550.89	452.775	582.305	519.047	410.665	580.4	497.443	474.241	470.486		10.09	491.763	510.811	528.89	430.775	560.305	497.047	388.665	558.4	475.443	452.241	448.486		10.09	0.956072	0.963448	0.939034	0.948203	0.977144	0.931271	0.957447	0.968791	0.9548	0.944179	0.933567	0.952178	0.0145333	0.00438195
10.1284	512.761	532.434	553.368	453.171	593.965	525.169	408.254	567.245	502.908	482.642	480.595		10.1284	490.761	510.434	531.368	431.171	571.965	503.169	386.254	545.245	480.908	460.642	458.595		10.1284	0.954124	0.962737	0.943433	0.949074	0.997478	0.942741	0.951508	0.945968	0.965775	0.961718	0.95461	0.957197	0.0154476	0.00465763
10.1542	511.856	530.685	555.362	453.739	582.464	525.149	406.864	571.946	497.594	471.764	477.675		10.1542	489.856	508.685	533.362	431.739	560.464	503.149	384.864	549.946	475.594	449.764	455.675		10.1542	0.952365	0.959438	0.946974	0.950324	0.977421	0.942704	0.948084	0.954124	0.955103	0.939007	0.948531	0.952189	0.0101297	0.00305423
10.1926	515.279	542.594	547.652	447.487	570.208	529.194	410.442	570.025	503.696	480.819	481.264		10.1926	493.279	520.594	525.652	425.487	548.208	507.194	388.442	548.025	481.696	458.819	459.264		10.1926	0.95902	0.9819	0.933285	0.936563	0.956047	0.950283	0.956898	0.950791	0.967358	0.957912	0.956002	0.955096	0.013259	0.00399773	0.00399773
10.2147	506.791	539.869	554.711	442.537	582.854	526.974	405.572	581.28	501.808	485.128	478.051		10.2147	484.791	517.869	532.711	420.537	560.854	504.974	383.572	559.28	479.808	463.128	456.051		10.2147	0.942518	0.97676	0.945818	0.925667	0.978101	0.946123	0.944901	0.970318	0.963566	0.966908	0.949314	0.955454	0.0166385	0.0050167
10.2532	508.938	534.74	552.133	450.514	588.728	535.609	397.707	580.067	505.528	480.357	480.543		10.2532	486.938	512.74	530.133	428.514	566.728	513.609	375.707	558.067	483.528	458.357	458.543		10.2532	0.946692	0.967086	0.94124	0.943226	0.988345	0.962302	0.925526	0.968214	0.971037	0.956948	0.954501	0.956829	0.0172511	0.00520141
10.279	506.119	529.027	557.732	450.093	578.798	517.515	413.91	579.793	508.051	492.155	476.058		10.279	484.119	507.027	535.732	428.093	556.798	495.515	391.91	557.793	486.051	470.155	454.058		10.279	0.941211	0.956311	0.951181	0.942299	0.971028	0.928401	0.965441	0.967738	0.976103	0.981579	0.945165	0.956951	0.0167634	0.00505436
10.3174	509.338	530.249	560.901	449.615	585.607	525.672	402.596	574.841	498.158	493.823	478.834		10.3174	487.338	508.249	538.901	427.615	563.607	503.672	380.596	552.841	476.158	471.823	456.834		10.3174	0.947469	0.958616	0.956808	0.941247	0.982903	0.943684	0.93757	0.959147	0.956236	0.985062	0.950944	0.956335	0.0154657	0.0046631	0.0046631
10.3395	498.705	538.023	560.959	450.691	583.677	524.066	413.768	576.612	492.355	486.453	481.774		10.3395	476.705	516.023	538.959	428.691	561.677	502.066	391.768	554.612	470.355	464.453	459.774		10.3395	0.926797	0.973278	0.956911	0.943615	0.979537	0.940675	0.965091	0.962219	0.944582	0.969675	0.957064	0.956313	0.0159159	0.00479882
10.3779	511.469	529.852	558.65	450.45	586.264	521.654	405.698	571.674	499.906	487.046	471.003		10.3779	489.469	507.852	536.65	428.45	564.264	499.654	383.698	549.674	477.906	465.046	449.003		10.3779	0.951612	0.957867	0.952811	0.943085	0.984048	0.936156	0.945211	0.953652	0.959746	0.970913	0.934643	0.953613	0.0146014	0.00440248
10.4037	510.24	533.103	547.486	450.566	575.71	528.948	404.679	585.37	501.587	475.343	481.634		10.4037	488.24	511.103	525.486	428.566	553.71	506.948	382.679	563.37	479.587	453.343	459.634		10.4037	0.949223	0.963999	0.93299	0.94334	0.965643	0.949822	0.942701	0.977414	0.963122	0.94648	0.956772	0.953773	0.0128593	0.00387724
10.4421	507.449	537.476	549.195	447.265	584.141	529.029	402.881	573.664	495.817	479.857	476.964		10.4421	485.449	515.476	527.195	425.265	562.141	507.029	380.881	551.664	473.817	457.857	454.964		10.4421	0.943797	0.972247	0.936024	0.936074	0.980346	0.949973	0.938272	0.957105	0.951535	0.955904	0.947051	0.951666	0.014307	0.00431372	0.00431372
10.4642	516.551	528.079	561.522	457.311	580.817	524.84	408.765	578.042	507.044	486.254	482.193		10.4642	494.551	506.079	539.522	435.311	558.817	502.84	386.765	556.042	485.044	464.254	460.193		10.4642	0.961493	0.954523	0.95791	0.958187	0.974549	0.942125	0.952767	0.9647	0.974081	0.969259	0.957936	0.960685	0.00963643	0.00290549
10.5026	507.326	534.336	558.767	448.193	580.782	523.896	410.78	565.868	501.695	486.385	487.667		10.5026	485.326	512.336	536.767	426.193	558.782	501.896	388.78	543.868	479.695	464.385	465.667		10.5026	0.943558	0.966324	0.953019	0.938117	0.974488	0.940356	0.957731	0.943579	0.963339	0.969533	0.969331	0.956307	0.0132196	0.00398585
10.5284	508.116	537.799	558.191	452.179	577.228	528.279	408.894	572.186	505.6	476.822	492.566		10.5284	486.116	515.799	536.191	430.179	555.228	506.279	386.894	550.186	483.6	454.822	470.566		10.5284	0.945094	0.972856	0.951996	0.946891	0.96829	0.948568	0.953085	0.954541	0.971181	0.949567	0.979528	0.958327	0.0121855	0.00367405
10.5669	506.662	516.138	560.537	448.937	580.954	510.434	398.587	580.966	496.963	488.473	485.222		10.5669	484.662	494.138	538.537	426.937	558.954	488.434	376.587	558.966	474.963	466.473	463.222		10.5669	0.942267	0.932001	0.956162	0.939755	0.974788	0.915134	0.927694	0.969773	0.953836	0.973892	0.964241	0.949958	0.0200841	0.00605557	0.00605557
10.589	510.588	531.707	555.807	451.869	569.431	530.847	414.209	567.379	499.977	476.143	486.681		10.589	488.588	509.707	533.807	429.869	547.431	508.847	392.209	545.379	477.977	454.143	464.681		10.589	0.9499	0.961366	0.947764	0.946208	0.954692	0.95338	0.966178	0.946201	0.959889	0.94815	0.967278	0.954637	0.00788299	0.00237681
10.6274	508.137	527.154	548.963	455.562	562.568	518.804	409.897	568.783	497.723	490.739	490.228		10.6274	486.137	505.154	526.963	433.562	540.568	496.804	387.897	546.783	475.723	468.739	468.228		10.6274	0.945134	0.952778	0.935612	0.954337	0.942724	0.930816	0.955555	0.948637	0.955362	0.978623	0.974662	0.952204	0.0145387	0.00438357
10.655	505.935	519.971	549.989	468.174	584.406	525.494	399.65	578.346	495.795	483.747	481.844		10.655	483.935	497.971	527.989	446.174	562.406	503.494	377.65	556.346	473.795	461.747	459.844		10.655	0.940853	0.93923	0.937434	0.982098	0.980808	0.94335	0.930313	0.965228	0.951491	0.964025	0.95721	0.953822	0.017581	0.00530088
10.6934	512.067	525.837	558.888	449.311	575.959	525.557	404.869	571.616	506.494	482.093	479.088		10.6934	490.067	503.837	536.888	427.311	553.959	503.557	382.869	549.616	484.494	460.093	457.088		10.6934	0.952775	0.950294	0.953234	0.940578	0.966077	0.943468	0.943169	0.953552	0.972977	0.960572	0.951473	0.95347	0.00988359	0.00298001	0.00298001
10.7156	511.282	527.217	556.311	456.957	582.57	526.315	402.547	570.219	499.291	491.582	476.098		10.7156	489.282	505.217	534.311	434.957	560.57	504.315	380.547	548.219	477.291	469.582	454.098		10.7156	0.951249	0.952897	0.948658	0.957408	0.977606	0.944888	0.937449	0.951128	0.958511	0.980383	0.945249	0.955039	0.0132382	0.00399148
10.754	502.986	516.517	551.345	450.564	574.38	523.346	401.117	578.031	500.784	483.992	475.94		10.754	480.986	494.517	529.345	428.564	552.38	501.346	379.117	556.031	478.784	461.992	453.94		10.754	0.93512	0.932715	0.939841	0.943336	0.963323	0.939326	0.933927	0.964681	0.96151	0.964537	0.94492	0.947567	0.0131818	0.00397446
10.7798	509.124	515.215	561.961	455.478	575.911	527.225	407.217	584.119	499.508	486.757	476.394		10.7798	487.124	493.215	539.961	433.478	553.911	505.225	385.217	562.119	477.508	464.757	454.394		10.7798	0.947053	0.93026	0.95869	0.954152	0.965993	0.946593	0.948953	0.975244	0.958947	0.970309	0.945865	0.954733	0.0128844	0.00388479
10.8182	514.173	528.159	550.092	457.846	581.775	530.715	406.177	570.67	489.235	480.481	469.144		10.8182	492.173	506.159	528.092	435.846	559.775	508.715	384.177	548.67	467.235	458.481	447.144		10.8182	0.956869	0.954674	0.937617	0.959365	0.97622	0.953132	0.946391	0.95191	0.938317	0.957207	0.930773	0.951134	0.0125219	0.0037755	0.0037755
10.8403	510.67	524.466	552.785	453.153	576.03	525.527	414.413	574.653	485.73	485.673	469.251		10.8403	488.67	502.466	530.785	431.153	554.03	503.527	392.413	552.653	463.73	463.673	447.251		10.8403	0.950059	0.947708	0.942398	0.949035	0.966201	0.943412	0.96668	0.958821	0.931278	0.968046	0.930996	0.950421	0.0132713	0.00400144
10.8787	505.301	520.739	550.92	445.413	578.585	515.131	406.284	578.3	500.547	481.152	468.771		10.8787	483.301	498.739	528.92	423.413	556.585	493.131	384.284	556.3	478.547	459.152	446.771		10.8787	0.939621	0.940679	0.939087	0.931998	0.970656	0.923934	0.946655	0.965148	0.961034	0.958607	0.929997	0.946129	0.0155424	0.00468622
10.9045	505.025	519.033	560.281	459.106	580.721	535.302	415.421	571.82	502.715	490.407	471.615		10.9045	483.025	497.033	538.281	437.106	558.721	513.302	393.421	549.82	480.715	468.407	449.615		10.9045	0.939084	0.937461	0.955707	0.962138	0.974382	0.961727	0.969163	0.953906	0.965388	0.97793	0.935917	0.957527	0.014706	0.00443401
10.9429	506.451	531.255	553.21	454.793	582.372	531.507	408.988	572.576	494.224	481.8	479.891		10.9429	484.451	509.255	531.21	432.793	560.372	509.507	386.988	550.576	472.224	459.8	457.891		10.9429	0.941857	0.960513	0.943153	0.952644	0.977261	0.954616	0.953316	0.955217	0.948336	0.95996	0.953144	0.954547	0.00958035	0.00288858	0.00288858
10.965	502.392	515.769	556.997	452.499	577.667	522.925	398.014	570.901	511.638	491.498	470.431		10.965	480.392	493.769	534.997	430.499	555.667	500.925	376.014	548.901	489.638	469.498	448.431		10.965	0.933965	0.931305	0.949876	0.947595	0.969056	0.938537	0.926283	0.952311	0.983307	0.980208	0.933452	0.949627	0.0199222	0.00600678
11.0034	507.453	529.123	559.898	451.969	582.851	521.492	408.85	557.684	500.688	490.046	474.418		11.0034	485.453	507.123	537.898	429.969	560.851	499.492	386.85	535.684	478.688	468.046	452.418		11.0034	0.943805	0.956492	0.955027	0.946428	0.978096	0.935852	0.952976	0.92938	0.961317	0.977176	0.941752	0.952573	0.0155048	0.00467486
11.0293	514.987	520.069	558.432	453.505	574.381	525.444	401.56	570.74	490.645	489.341	482.695		11.0293	492.987	498.069	536.432	431.505	552.381	503.444	379.56	548.74	468.645	467.341	460.695		11.0293	0.958452	0.939415	0.952424	0.949809	0.963325	0.943257	0.935018	0.952032	0.941148	0.975704	0.958981	0.951779	0.0119413	0.00360043
11.0677	512.639	532.997	555.189	448.889	574.124	527.827	402.517	573.12	482.43	484.658	475.253		11.0677	490.639	510.997	533.189	426.889	552.124	505.827	380.517	551.12	460.43	462.658	453.253		11.0677	0.953887	0.963799	0.946666	0.939649	0.962877	0.947721	0.937375	0.956161	0.924651	0.965927	0.94349	0.949291	0.0127485	0.00384381	0.00384381
11.0898	515.727	529.845	556.339	451.4	581.976	538.078	407.75	578.701	497.313	483.65	487.2		11.0898	493.727	507.845	534.339	429.4	559.976	516.078	385.75	556.701	475.313	461.65	465.2		11.0898	0.959891	0.957854	0.948708	0.945176	0.97657	0.966928	0.950266	0.965844	0.954539	0.963823	0.968359	0.959814	0.00957734	0.00288768
11.1282	514.478	535.293	560.394	449.16	573.724	521.462	402.705	575.069	508.295	484.874	481.524		11.1282	492.478	513.293	538.394	427.16	551.724	499.462	380.705	553.069	486.295	462.874	459.524		11.1282	0.957462	0.968129	0.955908	0.940245	0.962179	0.935796	0.937838	0.959542	0.976593	0.966378	0.956543	0.956056	0.0131084	0.00395234
11.154	509.005	536.134	559.303	452.85	594.783	526.135	402.856	583.568	505.252	485.554	491.3		11.154	487.005	514.134	537.303	430.85	572.783	504.135	380.856	561.568	483.252	463.554	469.3		11.154	0.946822	0.969715	0.953971	0.948368	0.998905	0.944551	0.93821	0.974288	0.970482	0.967798	0.976893	0.962728	0.0180142	0.0054315
11.1924	510.893	531.496	550.095	448.128	582.85	529.461	407.13	572.328	500.31	482.818	473.837		11.1924	488.893	509.496	528.095	426.128	560.85	507.461	385.13	550.328	478.31	460.818	451.837		11.1924	0.950493	0.960968	0.937622	0.937974	0.978094	0.950783	0.948739	0.954787	0.960558	0.962086	0.940542	0.952968	0.0121774	0.00367162	0.00367162
11.2145	506.814	525.823	543.709	460.564	580.922	525.635	413.005	578.048	500.286	481.015	483.051		11.2145	484.814	503.823	521.709	438.564	558.922	503.635	391.005	556.048	478.286	459.015	461.051		11.2145	0.942562	0.950268	0.926284	0.965347	0.974732	0.943614	0.963212	0.964711	0.96051	0.958321	0.959722	0.955389	0.013607	0.00410268
11.2529	515.125	530.828	554.416	442.447	586.44	524.776	412.893	580.068	499.16	480.993	468.232		11.2529	493.125	508.828	532.416	420.447	564.44	502.776	390.893	558.068	477.16	458.993	446.232		11.2529	0.95872	0.959708	0.945294	0.925469	0.984355	0.942005	0.962936	0.968215	0.958248	0.958276	0.928875	0.953827	0.0172023	0.00518669
11.2787	507.276	514.087	547.55	456.682	577.969	527.535	409.124	580.984	498.248	487.021	477.219		11.2787	485.276	492.087	525.55	434.682	555.969	505.535	387.124	558.984	476.248	465.021	455.219		11.2787	0.943461	0.928132	0.933103	0.956802	0.969582	0.947174	0.953651	0.969805	0.956417	0.970861	0.947582	0.952415	0.0143796	0.00433562
11.3171	511.355	529.767	555.331	450.579	574.008	523.759	406.986	582.119	500.333	488.223	473.982		11.3171	489.355	507.767	533.331	428.579	552.008	501.759	384.986	560.119	478.333	466.223	451.982		11.3171	0.951391	0.957706	0.946918	0.943369	0.962674	0.940099	0.948384	0.971774	0.960604	0.97337	0.940844	0.954285	0.0117925	0.00355557	0.00355557
11.3393	497.424	529.488	557.689	451.627	566.303	524.089	407.839	568.749	495.805	485.505	479.554		11.3393	475.424	507.488	535.689	429.627	544.303	502.089	385.839	546.749	473.805	463.505	457.554		11.3393	0.924307	0.95718	0.951105	0.945676	0.949237	0.940718	0.950486	0.948578	0.951511	0.967696	0.952443	0.948994	0.0106343	0.00320636
11.3777	512.021	527.706	543.022	455.555	582.282	521.374	406.426	570.727	490.72	485.394	475.562		11.3777	490.021	505.706	521.022	433.555	560.282	499.374	384.426	548.727	468.72	463.394	453.562		11.3777	0.952686	0.953819	0.925064	0.954322	0.977104	0.935631	0.947005	0.952009	0.941299	0.967464	0.944133	0.950049	0.014253	0.00429743
11.4035	509.227	519.135	550.654	447.077	583.505	525.556	403.73	585.595	495.278	476.846	473.312		11.4035	487.227	497.135	528.654	425.077	561.505	503.556	381.73	563.595	473.278	454.846	451.312		11.4035	0.947254	0.937653	0.938615	0.93566	0.979237	0.943466	0.940363	0.977804	0.950452	0.949618	0.939449	0.949052	0.0153637	0.00463233
11.4419	514.82	526.242	548.98	463.323	586.342	518.812	401.552	580.135	501.127	480.62	482.28		11.4419	492.82	504.242	526.98	441.323	564.342	496.812	379.552	558.135	479.127	458.62	460.28		11.4419	0.958127	0.951058	0.935642	0.97142	0.984184	0.930831	0.934998	0.968332	0.962198	0.957497	0.958117	0.955673	0.0165715	0.00499648	0.00499648
11.464	506.243	517.28	563.003	448.728	571.911	512.164	405.743	576.323	492.63	484.39	478.731		11.464	484.243	495.28	541.003	426.728	549.911	490.164	383.743	554.323	470.63	462.39	456.731		11.464	0.941452	0.934155	0.96054	0.939294	0.959017	0.918375	0.945322	0.961718	0.945135	0.965368	0.95073	0.947373	0.0140533	0.00423724
11.5024	512.918	526.419	548.105	449.326	587.725	536.464	408.379	576.64	493.953	486.491	484.128		11.5024	490.918	504.419	526.105	427.326	565.725	514.464	386.379	554.64	471.953	464.491	462.128		11.5024	0.95443	0.951392	0.934089	0.940611	0.986596	0.963904	0.951816	0.962268	0.947791	0.969754	0.961964	0.956783	0.0144271	0.00434992
11.5301	509.314	523.447	552.302	447.29	578.234	527.158	404.766	574.574	505.203	498.373	483.024		11.5301	487.314	501.447	530.302	425.29	556.234	505.158	382.766	552.574	483.203	476.373	461.024		11.5301	0.947423	0.945786	0.941541	0.936129	0.970044	0.946468	0.942916	0.958684	0.970384	0.994561	0.959666	0.955782	0.0171904	0.0051831
11.5685	515.951	527.738	555.705	451.359	589.083	522.298	399.616	579.089	486.47	484.598	480.736		11.5685	493.951	505.738	533.705	429.359	567.083	500.298	377.616	557.089	464.47	462.598	458.736		11.5685	0.960326	0.95388	0.947582	0.945086	0.988964	0.937362	0.930229	0.966517	0.932764	0.965802	0.954903	0.953038	0.0172123	0.00518971	0.00518971
11.5906	514.46	530.017	561.059	442.985	586.812	509.761	404.814	572.338	495.352	482.167	475.766		11.5906	492.46	508.017	539.059	420.985	564.812	487.761	382.814	550.338	473.352	460.167	453.766		11.5906	0.957427	0.958178	0.957088	0.926653	0.985004	0.913873	0.943034	0.954804	0.950601	0.960727	0.944558	0.950177	0.0186122	0.00561178
11.629	518.659	523.309	552.864	454.021	587.902	525.594	405.072	578.433	487.85	481.378	476.686		11.629	496.659	501.309	530.864	432.021	565.902	503.594	383.072	556.433	465.85	459.378	454.686		11.629	0.965591	0.945526	0.942538	0.950945	0.986905	0.943538	0.943669	0.965379	0.935535	0.959079	0.946473	0.953198	0.014804	0.00446358
11.6548	504.926	523.653	556.409	447.11	572.74	516.785	403.522	586.627	485.934	482.197	482.92		11.6548	482.926	501.653	534.409	425.11	550.74	494.785	381.522	564.627	463.934	460.197	460.92		11.6548	0.938892	0.946175	0.948832	0.935733	0.960463	0.927033	0.939851	0.979595	0.931687	0.960789	0.959449	0.948045	0.0156773	0.00472688
11.6932	504.727	517.991	554.16	445.227	570.257	528.107	405.765	594.461	499.003	487.066	477.566		11.6932	482.727	495.991	532.16	423.227	548.257	506.107	383.765	572.461	477.003	465.066	455.566		11.6932	0.938505	0.935496	0.944839	0.931588	0.956133	0.948246	0.945377	0.993186	0.957933	0.970955	0.948305	0.951869	0.0176117	0.00531014	0.00531014
11.7153	514.384	534.188	555.747	451.219	578.062	524.206	405.88	581.373	488.954	493.066	482.274		11.7153	492.384	512.188	533.747	429.219	556.062	502.206	383.88	559.373	466.954	471.066	460.274		11.7153	0.95728	0.966045	0.947657	0.944778	0.969744	0.940937	0.94566	0.970479	0.937752	0.983481	0.958105	0.956538	0.0145599	0.00438998
11.7537	513.993	534.537	556.833	440.528	574.931	520.748	394.879	572.059	495.417	487.417	489.791		11.7537	491.993	512.537	534.833	418.528	552.931	498.748	372.879	550.059	473.417	465.417	467.791		11.7537	0.95652	0.966703	0.949585	0.921245	0.964284	0.934458	0.91856	0.95432	0.950731	0.971687	0.973752	0.951077	0.0190356	0.00573946
11.7795	509.431	533.396	547.318	456.018	583.216	513.541	405.661	585.605	495.517	497.771	484.856		11.7795	487.431	511.396	525.318	434.018	561.216	491.541	383.661	563.605	473.517	475.771	462.856		11.7795	0.94765	0.964551	0.932692	0.955341	0.978733	0.920955	0.94512	0.977822	0.950932	0.993304	0.963479	0.957325	0.0211659	0.00638176
11.818	512.486	519.843	552.934	453.181	586.517	517.749	400.983	577.817	490.18	489.297	478.283		11.818	490.486	497.843	530.934	431.181	564.517	495.749	378.983	555.817	468.18	467.297	456.283		11.818	0.95359	0.938989	0.942663	0.949096	0.984489	0.928839	0.933596	0.96431	0.940214	0.975612	0.949797	0.951018	0.0174366	0.00525733	0.00525733
11.8401	504.24	522.028	550.722	453.957	586.342	517.62	401.945	575.283	501.099	498.408	479.437		11.8401	482.24	500.028	528.722	431.957	564.342	495.62	379.945	553.283	479.099	476.408	457.437		11.8401	0.937558	0.94311	0.938735	0.950804	0.984184	0.928597	0.935966	0.959914	0.962142	0.994634	0.952199	0.95344	0.0206542	0.00622748
11.8785	506.074	526.416	556.193	440.589	584.446	518.994	412.945	576.282	492.623	491.389	475.686		11.8785	484.074	504.416	534.193	418.589	562.446	496.994	390.945	554.282	470.623	469.389	453.686		11.8785	0.941124	0.951386	0.948449	0.921379	0.980878	0.931172	0.963064	0.961647	0.94512	0.97998	0.944391	0.95169	0.018545	0.00559153
11.9043	518.052	526.241	556.24	454.385	590.073	518.682	403.199	580.702	494.699	500.777	470.643		11.9043	496.052	504.241	534.24	432.385	568.073	496.682	381.199	558.702	472.699	478.777	448.643		11.9043	0.964411	0.951056	0.948532	0.951746	0.990691	0.930587	0.939055	0.969315	0.94929	0.99958	0.933894	0.957105	0.022141	0.00667577
11.9427	505.741	525.255	559.427	448.463	588.268	530.689	402.515	573.351	501.935	500.512	474.158		11.9427	483.741	503.255	537.427	426.463	566.268	508.689	380.515	551.351	479.935	478.512	452.158		11.9427	0.940476	0.949196	0.954191	0.938711	0.987543	0.953084	0.93737	0.956562	0.963821	0.999027	0.94121	0.956472	0.0201719	0.00608207	0.00608207
11.9648	511.457	522.709	560.454	451.865	579.297	520.61	414.459	574.436	497.095	501.172	474.884		11.9648	489.457	500.709	538.454	429.865	557.297	498.61	392.459	552.436	475.095	479.172	452.884		11.9648	0.951589	0.944394	0.956014	0.9462	0.971898	0.934199	0.966794	0.958444	0.954101	1.0004	0.942722	0.956978	0.0180052	0.00542877
12.0032	505.456	522.263	548.078	453.959	577.529	517.859	406.758	568.528	505.563	486.462	476.28		12.0032	483.456	500.263	526.078	431.959	555.529	495.859	384.758	546.528	483.563	464.462	454.28		12.0032	0.939922	0.943553	0.934041	0.950809	0.968815	0.929045	0.947823	0.948194	0.971107	0.969694	0.945628	0.949875	0.0143243	0.00431895
12.029	507.193	529.242	550.98	455.797	575.656	521.403	413.11	582.18	497.14	497.887	479.659		12.029	485.193	507.242	528.98	433.797	553.656	499.403	391.11	560.18	475.14	475.887	457.659		12.029	0.943299	0.956716	0.939193	0.954854	0.965548	0.935685	0.96347	0.97188	0.954192	0.993546	0.952661	0.957368	0.0163126	0.00491843
12.0674	515.216	525.49	540.184	457.599	567.69	526.315	405.348	568.981	494.881	501.91	473.906		12.0674	493.216	503.49	518.184	435.599	545.69	504.315	383.348	546.981	472.881	479.91	451.906		12.0674	0.958897	0.94964	0.920025	0.958821	0.951656	0.944888	0.944349	0.94898	0.949655	1.00195	0.940686	0.951777	0.019667	0.00592983	0.00592983
12.0896	504.645	538.714	547.928	452.976	584.385	525.654	408.735	577.395	487.889	493.75	472.99		12.0896	482.645	516.714	525.928	430.976	562.385	503.654	386.735	555.395	465.889	471.75	450.99		12.0896	0.938345	0.974582	0.933775	0.948645	0.980771	0.94365	0.952693	0.963578	0.935613	0.984909	0.938779	0.954122	0.0188378	0.00567982
12.128	510.711	537.367	553.182	450.733	575.847	512.957	402.173	567.231	492.724	493.276	487.431		12.128	488.711	515.367	531.182	428.733	553.847	490.957	380.173	545.231	470.724	471.276	465.431		12.128	0.950139	0.972041	0.943103	0.943708	0.965882	0.919861	0.936528	0.945944	0.945323	0.98392	0.968839	0.952299	0.0184411	0.0055602
12.1538	509.879	522.656	554.816	452.709	570.519	526.781	408.916	576.288	489.182	498.812	483.041		12.1538	487.879	500.656	532.816	430.709	548.519	504.781	386.916	554.288	467.182	476.812	461.041		12.1538	0.948521	0.944294	0.946004	0.948057	0.95659	0.945762	0.953139	0.961657	0.93821	0.995478	0.959701	0.95431	0.0153577	0.00463051
12.1922	518.375	534.334	547.101	450.544	578.785	515.505	405.489	570.745	495.776	485.727	473.033		12.1922	496.375	512.334	525.101	428.544	556.785	493.505	383.489	548.745	473.776	463.727	451.033		12.1922	0.965039	0.96632	0.932306	0.943292	0.971005	0.924635	0.944697	0.95204	0.951452	0.968159	0.938869	0.95071	0.015549	0.0046882	0.0046882
12.2143	514.185	526.551	561.633	460.593	573.293	517.36	406.99	571.821	483.488	493.512	481.168		12.2143	492.185	504.551	539.633	438.593	551.293	495.36	384.99	549.821	461.488	471.512	459.168		12.2143	0.956893	0.951641	0.958108	0.965411	0.961428	0.92811	0.948394	0.953907	0.926775	0.984412	0.955802	0.953717	0.0160822	0.00484896
12.2527	519.442	524.808	550.344	449.928	582	516.364	407.177	572.926	496.87	506.539	477.278		12.2527	497.442	502.808	528.344	427.928	560	494.364	385.177	550.926	474.87	484.539	455.278		12.2527	0.967113	0.948353	0.938064	0.941936	0.976612	0.926244	0.948855	0.955824	0.953649	1.01161	0.947705	0.955997	0.0228684	0.00689507
12.2785	518.307	531.661	553.199	451.825	570.692	520.38	403.533	576.999	496.179	500.64	476.49		12.2785	496.307	509.661	531.199	429.825	548.692	498.38	381.533	554.999	474.179	478.64	454.49		12.2785	0.964907	0.961279	0.943133	0.946111	0.956891	0.933769	0.939878	0.962891	0.952262	0.999294	0.946065	0.955135	0.0177533	0.00535281
12.3169	518.379	537.544	555.672	452.321	579.642	529.278	400.414	583.102	492.111	491.99	467.071		12.3169	496.379	515.544	533.672	430.321	557.642	507.278	378.414	561.102	470.111	469.99	445.071		12.3169	0.965047	0.972375	0.947524	0.947203	0.9725	0.95044	0.932195	0.973479	0.944092	0.981235	0.926458	0.955686	0.018234	0.00549777	0.00549777
12.339	501.063	521.253	549.162	446.741	574.958	522.154	408.328	574.482	495.598	489.356	480.421		12.339	479.063	499.253	527.162	424.741	552.958	500.154	386.328	552.482	473.598	467.356	458.421		12.339	0.931381	0.941648	0.935966	0.934921	0.964331	0.937092	0.95169	0.958524	0.951095	0.975736	0.954247	0.948785	0.013977	0.00421424
12.3775	516.239	530.895	556.678	456.659	572.36	522.528	406.698	577.786	499.848	489.538	471.572		12.3775	494.239	508.895	534.678	434.659	550.36	500.528	384.698	555.786	477.848	467.538	449.572		12.3775	0.960886	0.959834	0.94931	0.956752	0.9598	0.937793	0.947675	0.964256	0.95963	0.976116	0.935827	0.955262	0.0117731	0.00354972
12.4051	506.121	525.339	552.489	455.524	581.001	517.095	417.974	566.638	494.441	490.19	480.327		12.4051	484.121	503.339	530.489	433.524	559.001	495.095	395.974	544.638	472.441	468.19	458.327		12.4051	0.941215	0.949355	0.941873	0.954254	0.97487	0.927614	0.975453	0.944915	0.948771	0.977477	0.954052	0.953622	0.0160737	0.0048464
12.4435	513.897	526.328	541.886	446.779	578.527	517.872	405.862	580.232	486.757	483.719	471.492		12.4435	491.897	504.328	519.886	424.779	556.527	495.872	383.862	558.232	464.757	461.719	449.492		12.4435	0.956333	0.95122	0.923047	0.935004	0.970555	0.92907	0.945615	0.9685	0.93334	0.963967	0.935661	0.946574	0.0166256	0.0050128	0.0050128
12.4656	501.775	537.416	550.612	450.188	582.931	532.094	413.21	579.058	494.8	489.408	478.898		12.4656	479.775	515.416	528.612	428.188	560.931	510.094	391.21	557.058	472.8	467.408	456.898		12.4656	0.932766	0.972133	0.93854	0.942508	0.978236	0.955716	0.963717	0.966463	0.949492	0.975844	0.951077	0.956954	0.0154948	0.00467187
12.504	509.824	527.926	558.142	450.048	579.678	528.03	413.703	571.056	486.96	482.41	473.911		12.504	487.824	505.926	536.142	428.048	557.678	506.03	391.703	549.056	464.96	460.41	451.911		12.504	0.948414	0.954234	0.951909	0.9422	0.972563	0.948102	0.964931	0.95258	0.933748	0.961234	0.940696	0.951874	0.0112493	0.0033918
12.5298	506.662	533.262	555.236	450.175	587.537	521.467	405.547	579.571	491.488	490.948	475.451		12.5298	484.662	511.262	533.236	428.175	565.537	499.467	383.547	557.571	469.488	468.948	453.451		12.5298	0.942267	0.964298	0.94675	0.94248	0.986268	0.935805	0.94484	0.967353	0.942841	0.979059	0.943902	0.954169	0.0170812	0.00515018
12.5682	517.519	531.677	545.388	453.883	584.495	521.67	410.681	587.922	499.177	488.88	471.687		12.5682	495.519	509.677	523.388	431.883	562.495	499.67	388.681	565.922	477.177	466.88	449.687		12.5682	0.963375	0.961309	0.929265	0.950641	0.980963	0.936186	0.957487	0.981842	0.958282	0.974742	0.936067	0.957287	0.0180205	0.0054334	0.0054334
12.5904	511.799	528.099	560.571	454.798	590.653	528.591	409.722	578.787	497.258	480.948	483.223		12.5904	489.799	506.099	538.571	432.798	568.653	506.591	387.722	556.787	475.258	458.948	461.223		12.5904	0.952254	0.95456	0.956222	0.952655	0.991702	0.949153	0.955124	0.965993	0.954429	0.958182	0.96008	0.959123	0.011688	0.00352407
12.6288	511.869	526.47	559.689	446.749	587.127	520.979	411.863	571.828	490.898	487.076	484.689		12.6288	489.869	504.47	537.689	424.749	565.127	498.979	389.863	549.828	468.898	465.076	462.689		12.6288	0.95239	0.951488	0.954656	0.934938	0.985553	0.934891	0.960399	0.953919	0.941656	0.970975	0.963132	0.954909	0.0151302	0.00456193
12.6546	514.012	526.997	554.757	444.732	566.571	534.188	408.321	574.364	491.499	490.663	473.67		12.6546	492.012	504.997	532.757	422.732	544.571	512.188	386.321	552.364	469.499	468.663	451.67		12.6546	0.956556	0.952482	0.945899	0.930499	0.949705	0.959639	0.951673	0.958319	0.942863	0.978464	0.940195	0.951481	0.0124275	0.00374704
12.693	517.527	527.308	553.04	449.673	581.06	533.442	411.174	577.749	497.95	488.305	486.544		12.693	495.527	505.308	531.04	427.673	559.06	511.442	389.174	555.749	475.95	466.305	464.544		12.693	0.96339	0.953069	0.942851	0.941375	0.974973	0.958242	0.958701	0.964192	0.955818	0.973541	0.966993	0.959377	0.0109204	0.00329264	0.00329264
12.7151	517.103	523.905	559.275	453.542	577.085	518.864	403.068	565.433	491.328	483.969	481.955		12.7151	495.103	501.905	537.275	431.542	555.085	496.864	381.068	543.433	469.328	461.969	459.955		12.7151	0.962566	0.94665	0.953921	0.949891	0.968041	0.930928	0.938733	0.942824	0.94252	0.964489	0.957441	0.950728	0.0116943	0.00352596
12.7535	510.947	523.416	545.555	450.733	572.309	515.449	413.581	579.497	484.592	488.955	479.3		12.7535	488.947	501.416	523.555	428.733	550.309	493.449	391.581	557.497	462.592	466.955	457.3		12.7535	0.950598	0.945728	0.929561	0.943708	0.959711	0.92453	0.964631	0.967225	0.928992	0.974898	0.951914	0.949227	0.0166975	0.00503449
12.7793	515.028	522.241	557.987	456.665	575.487	523.84	404.764	574.121	490.573	489.339	476.017		12.7793	493.028	500.241	535.987	434.665	553.487	501.84	382.764	552.121	468.573	467.339	454.017		12.7793	0.958532	0.943512	0.951634	0.956765	0.965254	0.940251	0.942911	0.957898	0.941004	0.9757	0.94508	0.952595	0.011381	0.00343149
12.8177	510.936	531.684	554.905	452.142	584.693	522.308	414.738	568.301	486.639	487.173	482.979		12.8177	488.936	509.684	532.905	430.142	562.693	500.308	392.738	546.301	464.639	465.173	460.979		12.8177	0.950576	0.961322	0.946162	0.946809	0.981309	0.937381	0.967481	0.9478	0.933103	0.971178	0.959572	0.95479	0.0147531	0.00444822	0.00444822
12.8398	504.552	522.631	549.004	453.916	579.266	531.787	412.057	576.741	492.648	490.694	488.159		12.8398	482.552	500.631	527.004	431.916	557.266	509.787	390.057	554.741	470.648	468.694	466.159		12.8398	0.938165	0.944247	0.935685	0.950714	0.971844	0.955141	0.960876	0.962443	0.945171	0.978529	0.970355	0.955743	0.0142972	0.00431078
12.8783	515.816	533.885	550.216	457.087	571.71	527.412	399.31	578.658	499.143	490.692	479.449		12.8783	493.816	511.885	528.216	435.087	549.71	505.412	377.31	556.658	477.143	468.692	457.449		12.8783	0.960064	0.965473	0.937837	0.957694	0.958667	0.946944	0.929475	0.965769	0.958214	0.978525	0.952224	0.955535	0.0136063	0.00410245
12.9041	502.701	527.347	559	454.021	576.15	524.843	405.352	565.553	487.23	488.766	475.9		12.9041	480.701	505.347	537	432.021	554.15	502.843	383.352	543.553	465.23	466.766	453.9		12.9041	0.934566	0.953142	0.953433	0.950945	0.96641	0.94213	0.944359	0.943033	0.93429	0.974504	0.944837	0.949241	0.0124093	0.00374154
12.9425	511.012	526.472	555.338	446.54	583.684	516.659	401.16	577.247	503.771	489.824	475.436		12.9425	489.012	504.472	533.338	424.54	561.684	494.659	379.16	555.247	481.771	467.824	453.436		12.9425	0.950724	0.951492	0.946931	0.934478	0.979549	0.926797	0.934032	0.963321	0.967508	0.976713	0.943871	0.952311	0.0175954	0.00530521	0.00530521
12.9646	499.041	520.964	551.099	450.58	583.694	532.698	409.137	584.651	492.765	491.939	482.198		12.9646	477.041	498.964	529.099	428.58	561.694	510.698	387.137	562.651	470.765	469.939	460.198		12.9646	0.92745	0.941103	0.939405	0.943371	0.979566	0.956848	0.953683	0.976167	0.945406	0.981128	0.957946	0.954734	0.0178042	0.00536816
13.003	510.266	526.671	558.25	452.743	585.356	517.193	406.975	585.547	494.503	487.017	468.409		13.003	488.266	504.671	536.25	430.743	563.356	495.193	384.975	563.547	472.503	465.017	446.409		13.003	0.949274	0.951867	0.952101	0.948132	0.982465	0.927797	0.948357	0.977721	0.948896	0.970852	0.929243	0.953337	0.0175339	0.00528668
13.0288	511.601	526.736	558.686	455.113	570.917	523.234	416.381	575.649	492.262	486.422	472.947		13.0288	489.601	504.736	536.686	433.113	548.917	501.234	394.381	553.649	470.262	464.422	450.947		13.0288	0.951869	0.95199	0.952875	0.953349	0.957284	0.939116	0.971528	0.960549	0.944395	0.96961	0.93869	0.95375	0.0107813	0.00325068
13.0672	508.912	519.068	553.96	447.298	578.458	516.374	405.992	582.452	491.437	484.991	473.387		13.0672	486.912	497.068	531.96	425.298	556.458	494.374	383.992	560.452	469.437	462.991	451.387		13.0672	0.946641	0.937527	0.944484	0.936147	0.970435	0.926263	0.945936	0.972351	0.942739	0.966622	0.939606	0.948068	0.0151075	0.00455508	0.00455508
13.0893	506.118	521.295	556.292	459.586	576.917	526.204	399.857	575.756	486.563	487.213	472.868		13.0893	484.118	499.295	534.292	437.586	554.917	504.204	377.857	553.756	464.563	465.213	450.868		13.0893	0.941209	0.941727	0.948625	0.963195	0.967748	0.94468	0.930823	0.960734	0.932951	0.971262	0.938525	0.949225	0.0141978	0.0042808
13.1277	510.461	523.703	557.892	449.409	576.398	521.961	405.177	583.691	488.864	480.96	460.009		13.1277	488.461	501.703	535.892	427.409	554.398	499.961	383.177	561.691	466.864	458.96	438.009		13.1277	0.949653	0.946269	0.951465	0.940793	0.966842	0.936731	0.943928	0.974501	0.937572	0.958207	0.911758	0.947065	0.0166955	0.00503388
13.1535	514.494	523.984	555.83	453.004	580.868	532.464	415.809	583.451	482.177	492.839	469.934		13.1535	492.494	501.984	533.83	431.004	558.868	510.464	393.809	561.451	460.177	470.839	447.934		13.1535	0.957494	0.946799	0.947804	0.948707	0.974638	0.956409	0.970119	0.974085	0.924142	0.983007	0.932418	0.955966	0.0183891	0.00554453
13.192	510.115	522.103	546.605	448.654	574.426	525.667	406.589	581.429	488.375	495.019	475.397		13.192	488.115	500.103	524.605	426.654	552.426	503.667	384.589	559.429	466.375	473.019	453.397		13.192	0.94898	0.943251	0.931426	0.939132	0.963403	0.943674	0.947406	0.970577	0.936589	0.987559	0.94379	0.950526	0.0166899	0.00503219	0.00503219
13.2141	498.255	524.791	559.194	457.031	580.457	524.768	407.95	584.324	484.376	490.91	477.945		13.2141	476.255	502.791	537.194	435.031	558.457	502.768	385.95	562.324	462.376	468.91	455.945		13.2141	0.925922	0.948321	0.953777	0.957571	0.973921	0.94199	0.950759	0.975599	0.928559	0.97898	0.949093	0.953136	0.0177163	0.00534166
13.2525	498.956	525.12	547.685	458.976	573.728	530.053	400.377	582.986	488.359	492.17	475.137		13.2525	476.956	503.12	525.685	436.976	551.728	508.053	378.377	560.986	466.359	470.17	453.137		13.2525	0.927285	0.948942	0.933343	0.961852	0.962186	0.951892	0.932104	0.973278	0.936557	0.981611	0.943248	0.950209	0.0178165	0.00537187
13.2801	504.156	528.083	549.201	454.981	574.469	529.017	402.334	570.682	498.435	493.463	478.31		13.2801	482.156	506.083	527.201	432.981	552.469	507.017	380.334	548.682	476.435	471.463	456.31		13.2801	0.937395	0.95453	0.936035	0.953058	0.963478	0.949951	0.936925	0.951931	0.956792	0.98431	0.949853	0.952205	0.0138203	0.00416698
13.3185	508.327	531.86	552.298	455.351	578.732	525.177	409.984	571.956	508.125	486.705	478.987		13.3185	486.327	509.86	530.298	433.351	556.732	503.177	387.984	549.956	486.125	464.705	456.987		13.3185	0.945504	0.961654	0.941533	0.953873	0.970913	0.942756	0.95577	0.954141	0.976252	0.970201	0.951262	0.956715	0.0117724	0.0035495	0.0035495
13.3407	504.928	532.443	551.637	457.96	563.902	524.792	413.865	584.01	491.451	487.921	477.447		13.3407	482.928	510.443	529.637	435.96	541.902	502.792	391.865	562.01	469.451	465.921	455.447		13.3407	0.938896	0.962754	0.94036	0.959616	0.94505	0.942035	0.96533	0.975054	0.942767	0.97274	0.948057	0.953878	0.013527	0.00407855
13.3791	500.743	536.001	561.157	458.178	575.813	530.193	407.892	572.846	497.113	485.753	476.446		13.3791	478.743	514.001	539.157	436.178	553.813	508.193	385.892	550.846	475.113	463.753	454.446		13.3791	0.930759	0.969464	0.957262	0.960095	0.965822	0.952154	0.950616	0.955686	0.954137	0.968213	0.945973	0.955471	0.0110779	0.00334012
13.4049	519.127	525.463	552.919	447.044	574.897	528.713	399.36	586.433	499.243	491.987	485.724		13.4049	497.127	503.463	530.919	425.044	552.897	506.713	377.36	564.433	477.243	469.987	463.724		13.4049	0.966501	0.949589	0.942636	0.935588	0.964225	0.949381	0.929598	0.979258	0.958415	0.981229	0.965286	0.956519	0.0167978	0.00506473
13.4433	509.19	531.308	548.026	460.257	577.853	524.978	399.169	578.08	491.049	490.468	477		13.4433	487.19	509.308	526.026	438.257	555.853	502.978	377.169	556.08	469.049	468.468	455		13.4433	0.947182	0.960613	0.933949	0.964672	0.96938	0.942383	0.929128	0.964766	0.94196	0.978057	0.947126	0.952656	0.0156949	0.00473218	0.00473218
13.4654	514.56	529.11	551.608	451.694	574.179	525.174	408.328	573.606	493.091	484.025	476.309		13.4654	492.56	507.11	529.608	429.694	552.179	503.174	386.328	551.606	471.091	462.025	454.309		13.4654	0.957622	0.956467	0.940308	0.945823	0.962973	0.942751	0.95169	0.957004	0.94606	0.964606	0.945688	0.951908	0.00831523	0.00250713
13.5038	516.573	527.892	548.966	451.857	578.812	531.517	404.507	572.023	496.802	499.972	470.104		13.5038	494.573	505.892	526.966	429.857	556.812	509.517	382.507	550.023	474.802	477.972	448.104		13.5038	0.961535	0.95417	0.935618	0.946182	0.971052	0.954635	0.942278	0.954258	0.953513	0.997899	0.932772	0.954901	0.0180378	0.00543861
13.5296	515.187	530.205	553.352	444.518	591.273	523.26	403.103	579.571	496.457	495.147	480.226		13.5296	493.187	508.205	531.352	422.518	569.273	501.26	381.103	557.571	474.457	473.147	458.226		13.5296	0.958841	0.958533	0.943405	0.930028	0.992784	0.939165	0.938819	0.967353	0.95282	0.987826	0.953842	0.956674	0.0198265	0.00597792
13.568	510.02	528.382	551.188	444.59	579.719	523.514	413.055	582.487	494.575	497.439	466.871		13.568	488.02	506.382	529.188	422.59	557.719	501.514	391.055	560.487	472.575	475.439	444.871		13.568	0.948795	0.955094	0.939563	0.930186	0.972634	0.93964	0.963335	0.972412	0.949041	0.992611	0.926042	0.953578	0.0201953	0.00608912	0.00608912
13.5901	505.661	524.422	558.172	450.821	577.3	528.389	399.833	580.545	492.086	497.051	475.128		13.5901	483.661	502.422	536.172	428.821	555.3	506.389	377.833	558.545	470.086	475.051	453.128		13.5901	0.940321	0.947625	0.951963	0.943901	0.968416	0.948774	0.930764	0.969043	0.944042	0.991801	0.94323	0.952716	0.0172081	0.00518844
13.6286	507.344	528.979	550.751	449.854	577.494	517.618	403.585	580.469	495.315	490.824	468.871		13.6286	485.344	506.979	528.751	427.854	555.494	495.618	381.585	558.469	473.315	468.824	446.871		13.6286	0.943593	0.95622	0.938787	0.941773	0.968754	0.928594	0.940006	0.968911	0.950527	0.9788	0.930205	0.949652	0.0166158	0.00500986
13.6544	511.291	531.284	553.226	454.311	569.082	526.724	410.455	580.722	492.334	484.211	481.443		13.6544	489.291	509.284	531.226	432.311	547.082	504.724	388.455	558.722	470.334	462.211	459.443		13.6544	0.951266	0.960568	0.943181	0.951584	0.954084	0.945655	0.95693	0.96935	0.94454	0.964994	0.956375	0.954411	0.00837549	0.00252531
13.6928	516.421	525.189	556.494	458.904	580.84	525.553	412.774	575.855	498.89	490.762	471.958		13.6928	494.421	503.189	534.494	436.904	558.84	503.553	390.774	553.855	476.89	468.762	449.958		13.6928	0.96124	0.949072	0.948983	0.961693	0.974589	0.943461	0.962643	0.960906	0.957706	0.978671	0.936631	0.957781	0.0125906	0.0037962	0.0037962
13.7149	506.257	527.985	548.508	457.121	569.091	528.607	407.669	569.558	502.33	487.4	472.062		13.7149	484.257	505.985	526.508	435.121	547.091	506.607	385.669	547.558	480.33	465.4	450.062		13.7149	0.941479	0.954345	0.934804	0.957769	0.954099	0.949183	0.950067	0.949981	0.964614	0.971652	0.936847	0.951349	0.0111156	0.00335149
13.7533	518.092	532.281	556.683	462.377	590.265	526.049	406.626	582.562	495.195	482.299	466.651		13.7533	496.092	510.281	534.683	440.377	568.265	504.049	384.626	560.562	473.195	460.299	444.651		13.7533	0.964489	0.962448	0.949319	0.969338	0.991026	0.94439	0.947498	0.972542	0.950286	0.961002	0.925584	0.957993	0.0172709	0.00520738
13.7791	507.321	532.628	544.767	449.23	583.143	520.894	402.081	579.079	491.128	486.761	482.028		13.7791	485.321	510.628	522.767	427.23	561.143	498.894	380.081	557.079	469.128	464.761	460.028		13.7791	0.943548	0.963103	0.928162	0.940399	0.978605	0.934732	0.936301	0.966499	0.942118	0.970318	0.957593	0.951034	0.0167763	0.00505826
13.8175	517.432	514.885	548.829	444.295	581.673	524.127	406.464	573.386	489.31	477.541	470.681		13.8175	495.432	492.885	526.829	422.295	559.673	502.127	384.464	551.386	467.31	455.541	448.681		13.8175	0.963206	0.929637	0.935374	0.929537	0.976042	0.940789	0.947098	0.956622	0.938467	0.951069	0.933973	0.945619	0.0148893	0.0044893	0.0044893
13.8396	515.187	520.238	549.184	449.448	583.381	525.11	411.859	577.528	501.195	490.807	478.506		13.8396	493.187	498.238	527.184	427.448	561.381	503.11	389.859	555.528	479.195	468.807	456.506		13.8396	0.958841	0.939734	0.936005	0.940879	0.97902	0.942631	0.960389	0.963809	0.962335	0.978765	0.950261	0.955697	0.0151008	0.00455305
13.878	520.577	535.382	554.097	444.988	591.024	526.945	408.344	577.73	495.012	489.244	476.99		13.878	498.577	513.382	532.097	422.988	569.024	504.945	386.344	555.73	473.012	467.244	454.99		13.878	0.96932	0.968297	0.944728	0.931062	0.992349	0.946069	0.95173	0.964159	0.949918	0.975502	0.947106	0.958204	0.0173935	0.00524433
13.9038	511.764	524.521	546.04	448.559	576.885	534.058	413.828	583.392	495.071	486.833	480.319		13.9038	489.764	502.521	524.04	426.559	554.885	512.058	391.828	561.392	473.071	464.833	458.319		13.9038	0.952186	0.947812	0.930422	0.938922	0.967692	0.959396	0.965239	0.973982	0.950037	0.970468	0.954035	0.955472	0.013528	0.00407886
13.9423	514.228	522.635	550.342	445.336	574.486	527.103	413.089	584.881	498.087	482.539	475.949		13.9423	492.228	500.635	528.342	423.336	552.486	505.103	391.089	562.881	476.087	460.539	453.949		13.9423	0.956976	0.944255	0.938061	0.931828	0.963508	0.946365	0.963419	0.976566	0.956093	0.961503	0.944939	0.953047	0.0131487	0.00396449	0.00396449
13.9644	514.454	519.882	550.625	454.732	587.137	533.705	411.179	582.449	499.729	488.865	475.128		13.9644	492.454	497.882	528.625	432.732	565.137	511.705	389.179	560.449	477.729	466.865	453.128		13.9644	0.957416	0.939062	0.938563	0.95251	0.985571	0.958734	0.958714	0.972346	0.959391	0.974711	0.94323	0.958204	0.0149426	0.00450535
14.0028	504.884	511.727	550.987	448.566	590.644	522.086	403.711	578.455	496.289	493.992	475.429		14.0028	482.884	489.727	528.987	426.566	568.644	500.086	381.711	556.455	474.289	471.992	453.429		14.0028	0.93881	0.923681	0.939206	0.938938	0.991687	0.936965	0.940317	0.965417	0.952483	0.985415	0.943856	0.950616	0.021424	0.00645957
14.0286	502.654	513.023	553.859	452.679	584.678	518.276	399.887	583.778	485.075	486.968	478.945		14.0286	480.654	491.023	531.859	430.679	562.678	496.276	377.887	561.778	463.075	464.968	456.945		14.0286	0.934475	0.926125	0.944305	0.947991	0.981282	0.929826	0.930897	0.974652	0.929962	0.97075	0.951175	0.947404	0.0199124	0.00600381
14.067	512.471	518.287	544.453	457.986	576.789	530.368	405.815	581.674	494.141	482.682	476.853		14.067	490.471	496.287	522.453	435.986	554.789	508.368	383.815	559.674	472.141	460.682	454.853		14.067	0.95356	0.936054	0.927605	0.959673	0.967524	0.952482	0.9455	0.971002	0.948169	0.961802	0.94682	0.951836	0.0130098	0.0039226	0.0039226
14.0891	510.447	520.505	557.154	451.15	585.468	524.672	410.293	595.4	487.587	492.842	483.731		14.0891	488.447	498.505	535.154	429.15	563.468	502.672	388.293	573.4	465.587	470.842	461.731		14.0891	0.949625	0.940237	0.950155	0.944626	0.98266	0.94181	0.956531	0.994815	0.935007	0.983014	0.961138	0.958147	0.0200444	0.00604362
14.1275	504.464	526.078	548.811	451.34	587.766	525.337	410.137	578.303	495.175	488.561	473.726		14.1275	482.464	504.078	526.811	429.34	565.766	503.337	388.137	556.303	473.175	466.561	451.726		14.1275	0.937993	0.950749	0.935342	0.945044	0.986668	0.943056	0.956147	0.965153	0.950245	0.974076	0.940311	0.953162	0.0161488	0.00486906
14.1552	500.164	520.239	551.983	441.702	578.799	541.186	408.137	587.348	499.994	492.102	486.981		14.1552	478.164	498.239	529.983	419.702	556.799	519.186	386.137	565.348	477.994	470.102	464.981		14.1552	0.929634	0.939736	0.940974	0.923829	0.97103	0.972751	0.95122	0.980846	0.959923	0.981469	0.967903	0.956301	0.020425	0.00615838
14.1936	517.933	528.599	537.747	451.102	576.441	532.317	406.973	579.862	496.967	496.915	477.362		14.1936	495.933	506.599	515.747	429.102	554.441	510.317	384.973	557.862	474.967	474.915	455.362		14.1936	0.96418	0.955503	0.915698	0.94452	0.966917	0.956134	0.948352	0.967858	0.953844	0.991517	0.94788	0.955673	0.0186342	0.00561843	0.00561843
14.2157	510.05	521.778	548.42	447.086	573.905	535.918	403.799	575.821	500.189	495.71	480.036		14.2157	488.05	499.778	526.42	425.086	551.905	513.918	381.799	553.821	478.189	473.71	458.036		14.2157	0.948854	0.942638	0.934648	0.93568	0.962495	0.962881	0.940533	0.960847	0.960315	0.989001	0.953446	0.953758	0.0158416	0.00477643
14.2541	510.841	524.765	549.104	434.331	587.063	525.326	410.475	576.191	493.983	496.264	477.049		14.2541	488.841	502.765	527.104	412.331	565.063	503.326	388.475	554.191	471.983	474.264	455.049		14.2541	0.950391	0.948272	0.935863	0.907604	0.985442	0.943035	0.956979	0.961489	0.947852	0.990158	0.947228	0.95221	0.0224876	0.00678027
14.2799	510.178	523.209	549.162	449.523	584.96	522.887	407.031	589.594	489.358	500.806	483.773		14.2799	488.178	501.209	527.162	427.523	562.96	500.887	385.031	567.594	467.358	478.806	461.773		14.2799	0.949103	0.945337	0.935966	0.941044	0.981774	0.938466	0.948495	0.984742	0.938564	0.999641	0.961225	0.95676	0.0220681	0.00665378
14.3183	510.128	530.616	554.33	443.243	592.692	535.224	412.021	579.127	492.135	501.602	480.655		14.3183	488.128	508.616	532.33	421.243	570.692	513.224	390.021	557.127	470.135	479.602	458.655		14.3183	0.949005	0.959308	0.945141	0.927221	0.995258	0.96158	0.960788	0.966583	0.94414	1.0013	0.954735	0.96046	0.0216542	0.00652897	0.00652897
14.3404	513.805	525.561	551.575	435.998	578.126	525.946	410.064	577.237	493.941	490.096	468.773		14.3404	491.805	503.561	529.575	413.998	556.126	503.946	388.064	555.237	471.941	468.096	446.773		14.3404	0.956154	0.949773	0.94025	0.911274	0.969856	0.944197	0.955967	0.963304	0.947767	0.977281	0.930001	0.94962	0.0184955	0.00557659
14.3788	515.075	527.744	546.889	455.46	574.758	531.464	407.93	586.397	479.915	489.396	469.356		14.3788	493.075	505.744	524.889	433.46	552.758	509.464	385.93	564.397	457.915	467.396	447.356		14.3788	0.958623	0.953891	0.93193	0.954113	0.963982	0.954536	0.95071	0.979196	0.9196	0.975819	0.931215	0.952147	0.0184253	0.00555543
14.4046	515.315	526.06	551.08	457.731	575.659	523.564	394.709	584.516	494.545	501.97	481.118		14.4046	493.315	504.06	529.08	435.731	553.659	501.564	372.709	562.516	472.545	479.97	459.118		14.4046	0.95909	0.950715	0.939371	0.959111	0.965554	0.939734	0.918141	0.975932	0.94898	1.00207	0.955698	0.955854	0.0216375	0.00652395
14.4431	519.73	522.365	550.983	450.358	580.438	523.455	402.046	581.599	494.092	489.349	474.494		14.4431	497.73	500.365	528.983	428.358	558.438	501.455	380.046	559.599	472.092	467.349	452.494		14.4431	0.967673	0.943745	0.939199	0.942882	0.973888	0.93953	0.936215	0.970872	0.948071	0.975721	0.94191	0.952701	0.0157328	0.00474363	0.00474363
14.4652	526.644	525.657	553.298	451.96	575.124	523.65	406.885	572.884	499.731	495.082	476.619		14.4652	504.644	503.657	531.298	429.96	553.124	501.65	384.885	550.884	477.731	473.082	454.619		14.4652	0.981115	0.949955	0.943309	0.946409	0.964621	0.939895	0.948136	0.955751	0.959395	0.98769	0.946333	0.956601	0.0155603	0.00469162
14.5036	509.586	523.654	549.233	465.862	565.441	531.17	405	578.642	499.755	492.954	474.274		14.5036	487.586	501.654	527.233	443.862	543.441	509.17	383	556.642	477.755	470.954	452.274		14.5036	0.947952	0.946177	0.936092	0.977009	0.947734	0.953985	0.943492	0.965741	0.959443	0.983247	0.941452	0.954757	0.015072	0.00454438
14.5294	517.424	530.491	549.753	457.686	570.533	531.341	403.988	575.305	496.091	491.751	482.399		14.5294	495.424	508.491	527.753	435.686	548.533	509.341	381.988	553.305	474.091	469.751	460.399		14.5294	0.96319	0.959072	0.937015	0.959012	0.956614	0.954305	0.940999	0.959952	0.952085	0.980736	0.958365	0.956486	0.0114225	0.003444
14.5678	512.005	524.238	546.029	446.753	580.833	520.806	408.986	567.902	500.2	492.585	487.59		14.5678	490.005	502.238	524.029	424.753	558.833	498.806	386.986	545.902	478.2	470.585	465.59		14.5678	0.952655	0.947278	0.930403	0.934947	0.974577	0.934567	0.953311	0.947108	0.960337	0.982477	0.96917	0.953348	0.0170071	0.00512784	0.00512784
14.5899	510.523	526.202	565.277	449.803	578.982	528.54	409.792	572.743	498.34	490.473	475.349		14.5899	488.523	504.202	543.277	427.803	556.982	506.54	387.792	550.743	476.34	468.473	453.349		14.5899	0.949773	0.950982	0.964577	0.941661	0.971349	0.949057	0.955297	0.955507	0.956602	0.978068	0.94369	0.956051	0.011254	0.0033932
14.6283	516.62	519.909	556.577	453.405	574.355	537.351	403.445	567.636	497.744	494.29	480.978		14.6283	494.62	497.909	534.577	431.405	552.355	515.351	381.445	545.636	475.744	472.29	458.978		14.6283	0.961627	0.939113	0.949131	0.949589	0.96328	0.965566	0.939661	0.946647	0.955405	0.986037	0.955407	0.955587	0.0134353	0.0040509
14.6541	507.269	528.418	556.638	455.495	577.093	527.968	413.553	577.761	494.571	494.458	475.625		14.6541	485.269	506.418	534.638	433.495	555.093	505.968	391.553	555.761	472.571	472.458	453.625		14.6541	0.943447	0.955162	0.949239	0.95419	0.968055	0.947986	0.964562	0.964213	0.949033	0.986387	0.944264	0.956958	0.012873	0.00388136
14.6925	509.268	532.371	548.083	459.867	581.157	525.698	413.569	576.741	495.355	494.687	479.653		14.6925	487.268	510.371	526.083	437.867	559.157	503.698	391.569	554.741	473.355	472.687	457.653		14.6925	0.947333	0.962618	0.93405	0.963813	0.975142	0.943732	0.964601	0.962443	0.950607	0.986866	0.952649	0.958532	0.0148884	0.00448901	0.00448901
14.7147	515.595	530.927	556.418	447.701	582.668	514.061	404.528	581.915	501.979	494.066	483.757		14.7147	493.595	508.927	534.418	425.701	560.668	492.061	382.528	559.915	479.979	472.066	461.757		14.7147	0.959634	0.959894	0.948848	0.937034	0.977777	0.921929	0.942329	0.97142	0.963909	0.985569	0.961192	0.957231	0.0185638	0.00559718
14.7531	514.882	534.068	555.063	451.272	577.917	529.582	417.282	577.183	496.159	485.803	470.104		14.7531	492.882	512.068	533.063	429.272	555.917	507.582	395.282	555.183	474.159	463.803	448.104		14.7531	0.958248	0.965819	0.946443	0.944894	0.969492	0.95101	0.973748	0.96321	0.952222	0.968318	0.932772	0.956925	0.0125944	0.00379735
14.7789	513.605	523.555	550.361	451.986	594.044	534.31	411.83	574.557	492.099	487.236	484.185		14.7789	491.605	501.555	528.361	429.986	572.044	512.31	389.83	552.557	470.099	465.236	462.185		14.7789	0.955765	0.94599	0.938094	0.946466	0.997616	0.959868	0.960317	0.958654	0.944068	0.97131	0.962083	0.958203	0.0162625	0.00490333
14.8173	502.931	525.243	547.436	451.149	592.293	531.732	409.544	565.475	487.454	488.632	476.682		14.8173	480.931	503.243	525.436	429.149	570.293	509.732	387.544	543.475	465.454	466.632	454.682		14.8173	0.935013	0.949174	0.932901	0.944623	0.994563	0.955038	0.954686	0.942897	0.93474	0.974224	0.946464	0.951302	0.0185572	0.00559521	0.00559521
14.8394	508.014	525.48	556.543	456.362	581.367	538.685	408.938	578.776	494.875	489.36	468.265		14.8394	486.014	503.48	534.543	434.362	559.367	516.685	386.938	556.776	472.875	467.36	446.265		14.8394	0.944895	0.949621	0.94907	0.956098	0.975508	0.968065	0.953193	0.965974	0.949643	0.975744	0.928944	0.956069	0.0141695	0.00427228
14.8778	513.509	535.296	547.23	453.479	581.264	525.208	406.899	581.158	502.15	489.419	475.335		14.8778	491.509	513.296	525.23	431.479	559.264	503.208	384.899	559.158	480.15	467.419	453.335		14.8778	0.955579	0.968135	0.932535	0.949752	0.975329	0.942814	0.94817	0.970106	0.964253	0.975867	0.94366	0.956927	0.0146643	0.00442146
14.9036	518.082	528.178	553.851	456.727	582.154	523.107	410.396	580.464	491.687	491.982	479.238		14.9036	496.082	506.178	531.851	434.727	560.154	501.107	388.396	558.464	469.687	469.982	457.238		14.9036	0.964469	0.954709	0.944291	0.956902	0.976881	0.938878	0.956785	0.968902	0.943241	0.981218	0.951785	0.958005	0.0137107	0.00413394
14.942	506.762	530.244	555.571	442.629	591.588	535.341	415.034	578.012	493.116	488.559	473.858		14.942	484.762	508.244	533.571	420.629	569.588	513.341	393.034	556.012	471.116	466.559	451.858		14.942	0.942461	0.958606	0.947345	0.92587	0.993333	0.9618	0.96821	0.964648	0.946111	0.974072	0.940586	0.95664	0.018659	0.00562591	0.00562591
14.9641	510.656	529.069	550.737	457.071	581.775	529.748	410.93	578.977	506.044	489.542	475.426		14.9641	488.656	507.069	528.737	435.071	559.775	507.748	388.93	556.977	484.044	467.542	453.426		14.9641	0.950032	0.95639	0.938762	0.957659	0.97622	0.951321	0.9581	0.966322	0.972073	0.976124	0.94385	0.958805	0.0126561	0.00381597
15.0026	515.901	523.723	543.317	450.134	588.147	523.607	409.815	584.826	480.667	491.374	482.564		15.0026	493.901	501.723	521.317	428.134	566.147	501.607	387.815	562.826	458.667	469.374	460.564		15.0026	0.960229	0.946307	0.925588	0.942389	0.987332	0.939815	0.955353	0.97647	0.92111	0.979949	0.958708	0.953932	0.0215319	0.00649212
15.0302	509.661	519.25	548.676	450.53	587.323	528.385	405.681	575.773	494.852	478.106	477.021		15.0302	487.661	497.25	526.676	428.53	565.323	506.385	383.681	553.773	472.852	456.106	455.021		15.0302	0.948097	0.93787	0.935103	0.943261	0.985895	0.948767	0.94517	0.960764	0.949597	0.952248	0.94717	0.950358	0.0136348	0.00411105
15.0686	512.998	528.724	550.779	453.151	576.143	520.277	408.506	582.549	489.915	485.57	484.507		15.0686	490.998	506.724	528.779	431.151	554.143	498.277	386.506	560.549	467.915	463.57	462.507		15.0686	0.954585	0.955739	0.938836	0.94903	0.966398	0.933576	0.952129	0.97252	0.939682	0.967831	0.962753	0.953916	0.0128382	0.00387085	0.00387085
15.0907	514.457	526.115	558.35	451.667	572.63	514.452	411.691	567.895	489.438	485.35	481.57		15.0907	492.457	504.115	536.35	429.667	550.63	492.452	389.691	545.895	467.438	463.35	459.57		15.0907	0.957422	0.950818	0.952279	0.945764	0.960271	0.922662	0.959975	0.947096	0.938724	0.967372	0.956639	0.95082	0.0122691	0.00369927
15.1291	510.006	527.094	558.303	452.844	577.438	526.508	408.799	572.795	493.347	489.794	482.183		15.1291	488.006	505.094	536.303	430.844	555.438	504.508	386.799	550.795	471.347	467.794	460.183		15.1291	0.948768	0.952665	0.952195	0.948354	0.968656	0.94525	0.952851	0.955597	0.946574	0.97665	0.957915	0.955043	0.00964906	0.0029093
15.1549	503.922	528.216	552.636	453.416	572.231	523.981	400.633	565.899	490.645	486.25	479.885		15.1549	481.922	506.216	530.636	431.416	550.231	501.981	378.633	543.899	468.645	464.25	457.885		15.1549	0.93694	0.954781	0.942134	0.949613	0.959575	0.940515	0.932734	0.943633	0.941148	0.969251	0.953132	0.947587	0.0108188	0.00326199
15.1934	521.61	532.428	548.66	449.793	574.989	523.145	403.909	567.058	490.086	490.158	481.581		15.1934	499.61	510.428	526.66	427.793	552.989	501.145	381.909	545.058	468.086	468.158	459.581		15.1934	0.971328	0.962725	0.935074	0.941639	0.964385	0.938949	0.940804	0.945644	0.940026	0.97741	0.956662	0.952241	0.0147718	0.00445388	0.00445388
15.2155	509.169	525.338	546.023	451.554	579.139	530.911	409.035	575.429	491.168	489.544	469.98		15.2155	487.169	503.338	524.023	429.554	557.139	508.911	387.035	553.429	469.168	467.544	447.98		15.2155	0.947141	0.949353	0.930392	0.945515	0.971623	0.9535	0.953432	0.960167	0.942198	0.976128	0.932514	0.951087	0.0142983	0.0043111
15.2539	505.854	529.051	551.588	448.615	577.832	525.95	403.894	576.132	494.853	490.603	476.273		15.2539	483.854	507.051	529.588	426.615	555.832	503.95	381.894	554.132	472.853	468.603	454.273		15.2539	0.940696	0.956356	0.940273	0.939046	0.969343	0.944205	0.940767	0.961387	0.949599	0.978339	0.945613	0.95142	0.0132836	0.00400516
15.2797	504.254	531.509	558.723	447.666	583.783	525.958	410.741	574.008	495.175	497.09	474.118		15.2797	482.254	509.509	536.723	425.666	561.783	503.958	388.741	552.008	473.175	475.09	452.118		15.2797	0.937585	0.960992	0.952941	0.936957	0.979722	0.94422	0.957635	0.957702	0.950245	0.991882	0.941127	0.955546	0.0172705	0.00520724
15.3181	512.339	526.446	551.856	455.62	567.16	524.279	407.163	573.287	494.308	489.365	475.644		15.3181	490.339	504.446	529.856	433.62	545.16	502.279	385.163	551.287	472.308	467.365	453.644		15.3181	0.953304	0.951443	0.940749	0.954465	0.950732	0.941074	0.94882	0.956451	0.948504	0.975754	0.944304	0.951418	0.00957908	0.0028882	0.0028882
15.3402	515.647	521.717	546.308	455.158	592.676	529.203	399.499	569.383	493.2	492.461	477.983		15.3402	493.647	499.717	524.308	433.158	570.676	507.203	377.499	547.383	471.2	470.461	455.983		15.3402	0.959735	0.942523	0.930898	0.953448	0.99523	0.950299	0.929941	0.949677	0.946279	0.982218	0.949173	0.953584	0.0197156	0.00594448
15.3786	512.316	522.882	550.807	460.447	574.001	522.937	407.09	581.342	492.68	490.836	480.216		15.3786	490.316	500.882	528.807	438.447	552.001	500.937	385.09	559.342	470.68	468.836	458.216		15.3786	0.953259	0.944721	0.938886	0.96509	0.962662	0.938559	0.948641	0.970426	0.945235	0.978826	0.953821	0.954557	0.0131901	0.00397697
15.4044	499.965	525.376	555.4	454.169	583.557	529.341	410.772	572.995	498.531	495.059	480.19		15.4044	477.965	503.376	533.4	432.169	561.557	507.341	388.772	550.995	476.531	473.059	458.19		15.4044	0.929247	0.949425	0.947041	0.951271	0.979327	0.950558	0.957711	0.955944	0.956985	0.987642	0.953767	0.956265	0.0156356	0.00471432
15.4428	513.842	530.736	546.912	451.543	583.377	534.53	409.625	577.744	497.981	490.753	473.02		15.4428	491.842	508.736	524.912	429.543	561.377	512.53	387.625	555.744	475.981	468.753	451.02		15.4428	0.956226	0.959534	0.931971	0.945491	0.979013	0.96028	0.954885	0.964183	0.955881	0.978652	0.938842	0.956814	0.0145492	0.00438675	0.00438675
15.465	514.073	528.093	563.752	457.787	577.273	537.699	406.988	574.524	502.932	494.89	478.443		15.465	492.073	506.093	541.752	435.787	555.273	515.699	384.988	552.524	480.932	472.89	456.443		15.465	0.956675	0.954549	0.96187	0.959235	0.968368	0.966218	0.948389	0.958597	0.965823	0.987289	0.95013	0.961559	0.0106754	0.00321874
15.5034	514.947	531.809	548.148	446.303	585.238	533.504	408.199	575.732	505.392	497.837	479.435		15.5034	492.947	509.809	526.148	424.303	563.238	511.504	386.199	553.732	483.392	475.837	457.435		15.5034	0.958374	0.961558	0.934165	0.933957	0.982259	0.958358	0.951373	0.960693	0.970764	0.993442	0.952195	0.95974	0.0179394	0.00540894
15.5292	516.794	519.35	562.416	453.133	581.432	535.354	402.477	583.519	492.054	485.135	483.625		15.5292	494.794	497.35	540.416	431.133	559.432	513.354	380.477	561.519	470.054	463.135	461.625		15.5292	0.961965	0.938059	0.959498	0.948991	0.975622	0.961824	0.937277	0.974203	0.943978	0.966923	0.960917	0.957205	0.0133855	0.00403587
15.5676	515.618	521.458	548.367	449.949	580.875	537.408	405.39	576.845	494.718	490.591	476.372		15.5676	493.618	499.458	526.367	427.949	558.875	515.408	383.39	554.845	472.718	468.591	454.372		15.5676	0.959679	0.942035	0.934554	0.941982	0.97465	0.965672	0.944453	0.962624	0.949328	0.978314	0.945819	0.954464	0.0145043	0.0043732	0.0043732
15.5897	508.69	531.967	553.147	453.549	577.171	524.986	401.109	575.502	500.766	495.127	480.022		15.5897	486.69	509.967	531.147	431.549	555.171	502.986	379.109	553.502	478.766	473.127	458.022		15.5897	0.94621	0.961856	0.943041	0.949906	0.968191	0.942398	0.933907	0.960294	0.961474	0.987784	0.953417	0.955316	0.0148899	0.00448948
15.6281	510.228	523.695	565.97	456.74	585.928	529.589	404.852	570.996	488.145	499.799	479.643		15.6281	488.228	501.695	543.97	434.74	563.928	507.589	382.852	548.996	466.145	477.799	457.643		15.6281	0.9492	0.946254	0.965808	0.95693	0.983462	0.951023	0.943127	0.952476	0.936128	0.997538	0.952628	0.957689	0.0181541	0.00547367
15.6539	515.687	530.669	557.448	449.02	576.847	533.791	403.381	569.452	505.551	495.907	473.465		15.6539	493.687	508.669	535.448	427.02	554.847	511.791	381.381	547.452	483.551	473.907	451.465		15.6539	0.959813	0.959408	0.950677	0.939937	0.967626	0.958896	0.939504	0.949797	0.971083	0.989413	0.939768	0.956902	0.0153788	0.00463688
15.6923	510.778	538.583	564.628	450.926	589.069	527.519	402.644	560.281	500.636	483.657	474.439		15.6923	488.778	516.583	542.628	428.926	567.069	505.519	380.644	538.281	478.636	461.657	452.439		15.6923	0.950269	0.974334	0.963425	0.944133	0.98894	0.947144	0.937688	0.933886	0.961212	0.963837	0.941795	0.955151	0.0168381	0.00507689	0.00507689
15.7144	509.012	530.794	554.608	453.953	581.752	538.336	402.916	566.384	488.751	491.388	480.813		15.7144	487.012	508.794	532.608	431.953	559.752	516.336	380.916	544.384	466.751	469.388	458.813		15.7144	0.946836	0.959643	0.945635	0.950796	0.97618	0.967411	0.938358	0.944474	0.937345	0.979978	0.955063	0.954702	0.0145554	0.00438861
15.7528	511.759	526.403	552.692	458.897	583.486	531.633	405.076	563.414	492.554	493.94	470.538		15.7528	489.759	504.403	530.692	436.897	561.486	509.633	383.076	541.414	470.554	471.94	448.538		15.7528	0.952176	0.951362	0.942233	0.961678	0.979204	0.954852	0.943679	0.939322	0.944982	0.985306	0.933675	0.953497	0.0162399	0.00489651
15.7787	509.261	520.479	547.905	453.293	583.973	527.423	397.787	564.889	487.574	494.013	472.363		15.7787	487.261	498.479	525.905	431.293	561.973	505.423	375.787	542.889	465.574	472.013	450.363		15.7787	0.94732	0.940188	0.933734	0.949343	0.980053	0.946964	0.925723	0.941881	0.934981	0.985458	0.937474	0.947556	0.0187356	0.005649
15.8171	512.134	530.336	550.841	454.757	573.332	536.98	402.737	576.527	498.477	487.202	480.896		15.8171	490.134	508.336	528.841	432.757	551.332	514.98	380.737	554.527	476.477	465.202	458.896		15.8171	0.952905	0.95878	0.938947	0.952565	0.961496	0.96487	0.937917	0.962072	0.956877	0.971239	0.955236	0.955718	0.010126	0.00305309	0.00305309
15.8392	511.547	527.96	555.557	455.391	580.729	536.386	397.132	567.568	489.476	496.577	482.845		15.8392	489.547	505.96	533.557	433.391	558.729	514.386	375.132	545.568	467.476	474.577	460.845		15.8392	0.951764	0.954298	0.94732	0.953961	0.974396	0.963758	0.92411	0.946529	0.938801	0.990811	0.959293	0.955004	0.0176443	0.00531994
15.8776	518.317	520.841	553.529	457.773	577.996	534.52	392.523	565.618	487.384	488.475	483.57		15.8776	496.317	498.841	531.529	435.773	555.996	512.52	370.523	543.618	465.384	466.475	461.57		15.8776	0.964926	0.940871	0.943719	0.959204	0.969629	0.960261	0.912756	0.943145	0.934599	0.973896	0.960802	0.951255	0.0180626	0.00544608
15.9052	506.407	519.355	558.862	450.705	576.694	527.454	398.693	572.676	484.169	489.273	483.913		15.9052	484.407	497.355	536.862	428.705	554.694	505.454	376.693	550.676	462.169	467.273	461.913		15.9052	0.941771	0.938068	0.953188	0.943646	0.967359	0.947022	0.927955	0.955391	0.928143	0.975562	0.961516	0.949057	0.0152965	0.00461208
15.9436	519.59	528.326	556.856	450.595	578.746	520.831	407.215	564.866	491.775	484.772	476.849		15.9436	497.59	506.326	534.856	428.595	556.746	498.831	385.215	542.866	469.775	462.772	454.849		15.9436	0.967401	0.954989	0.949626	0.943404	0.970937	0.934614	0.948949	0.941841	0.943417	0.966165	0.946812	0.95165	0.0118278	0.00356621	0.00356621
15.9658	519.661	525.151	558.858	458.022	590.063	516.791	403.032	571.695	500.327	499.795	473.378		15.9658	497.661	503.151	536.858	436.022	568.063	494.791	381.032	549.695	478.327	477.795	451.378		15.9658	0.967539	0.949	0.953181	0.959752	0.990674	0.927044	0.938644	0.953689	0.960592	0.99753	0.939587	0.95793	0.0212736	0.00641424
16.0042	517.357	526.283	558.477	448.09	582.642	534.592	401.408	569.505	485.853	494.009	471.244		16.0042	495.357	504.283	536.477	426.09	560.642	512.592	379.408	547.505	463.853	472.009	449.244		16.0042	0.96306	0.951135	0.952504	0.93789	0.977732	0.960396	0.934643	0.949889	0.931525	0.98545	0.935145	0.95267	0.0178271	0.00537506
16.03	522.125	526.601	547.383	462.091	585.232	535.168	404.19	561.948	502.029	491.21	471.739		16.03	500.125	504.601	525.383	440.091	563.232	513.168	382.19	539.948	480.029	469.21	449.739		16.03	0.97233	0.951735	0.932807	0.968709	0.982249	0.961475	0.941497	0.936778	0.96401	0.979606	0.936175	0.957034	0.0181266	0.00546539
16.0684	512.442	525.569	542.252	454.491	586.856	531.931	402.382	573.411	500.468	486.16	475.868		16.0684	490.442	503.569	520.252	432.491	564.856	509.931	380.382	551.411	478.468	464.16	453.868		16.0684	0.953504	0.949789	0.923697	0.95198	0.985081	0.955411	0.937043	0.956666	0.960875	0.969063	0.94477	0.953443	0.0159967	0.00482318	0.00482318
16.0905	517.436	520.766	546.815	454.509	587.345	524.197	403.429	571.855	492.597	491.972	471.547		16.0905	495.436	498.766	524.815	432.509	565.345	502.197	381.429	549.855	470.597	469.972	449.547		16.0905	0.963213	0.94073	0.931798	0.952019	0.985933	0.94092	0.939622	0.953966	0.945068	0.981197	0.935775	0.95184	0.0180435	0.00544032
16.1289	518.722	526.901	547.689	461.077	595.678	535.86	403.657	564.632	494.694	494.793	468.483		16.1289	496.722	504.901	525.689	439.077	573.678	513.86	381.657	542.632	472.694	472.793	446.483		16.1289	0.965714	0.952301	0.93335	0.966477	1.00047	0.962772	0.940184	0.941435	0.94928	0.987087	0.929397	0.957133	0.022184	0.00668874
16.1547	508.265	516.945	548.154	456.158	581.917	521.475	408.983	577.647	486.469	495.651	469.692		16.1547	486.265	494.945	526.154	434.158	559.917	499.475	386.983	555.647	464.469	473.651	447.692		16.1547	0.945383	0.933523	0.934176	0.955649	0.976467	0.93582	0.953304	0.964015	0.932762	0.988878	0.931914	0.950172	0.0195435	0.0058926
16.1931	513.789	516.361	548.094	449.591	591.833	520.755	404.116	575.58	487.2	493.165	468.477		16.1931	491.789	494.361	526.094	427.591	569.833	498.755	382.116	553.58	465.2	471.165	446.477		16.1931	0.956123	0.932421	0.934069	0.941194	0.99376	0.934471	0.941314	0.960429	0.93423	0.983688	0.929385	0.94919	0.0219533	0.00661918	0.00661918
16.2152	508.234	521.903	551.72	453.47	583.837	533.908	402.956	573.992	485.837	489.256	479.62		16.2152	486.234	499.903	529.72	431.47	561.837	511.908	380.956	551.992	463.837	467.256	457.62		16.2152	0.945323	0.942874	0.940507	0.949732	0.979816	0.959115	0.938457	0.957674	0.931493	0.975527	0.95258	0.9521	0.0150974	0.00455205
16.2537	514.971	526.776	555.662	456.069	594.984	528.803	404.948	563.345	496.209	489.952	476.844		16.2537	492.971	504.776	533.662	434.069	572.984	506.803	382.948	541.345	474.209	467.952	454.844		16.2537	0.958421	0.952065	0.947506	0.955453	0.999256	0.94955	0.943364	0.939202	0.952322	0.97698	0.946802	0.956447	0.0172753	0.00520871
16.2795	506.031	525.942	561.767	446.277	590.985	531.729	405.107	579.439	493.633	495.699	479.539		16.2795	484.031	503.942	539.767	424.277	568.985	509.729	383.107	557.439	471.633	473.699	457.539		16.2795	0.94104	0.950492	0.958345	0.933899	0.992281	0.955032	0.943756	0.967124	0.947149	0.988978	0.952412	0.957319	0.0187048	0.0056397
16.3179	509.529	527.783	558.442	439.519	570.955	525.952	407.257	579.576	493.724	489.515	475.266		16.3179	487.529	505.783	536.442	417.519	548.955	503.952	385.257	557.576	471.724	467.515	453.266		16.3179	0.947841	0.953964	0.952442	0.919024	0.95735	0.944208	0.949052	0.967362	0.947332	0.976068	0.943517	0.950742	0.0144857	0.00436762	0.00436762
16.34	502.18	530.217	547.6	447.265	583.6	528.04	409.42	576.578	486.376	485.871	472.48		16.34	480.18	508.217	525.6	425.265	561.6	506.04	387.42	554.578	464.376	463.871	450.48		16.34	0.933553	0.958555	0.933192	0.936074	0.979402	0.94812	0.95438	0.96216	0.932575	0.96846	0.937718	0.949472	0.0162708	0.00490584
16.3784	509.492	521.502	551.391	459.079	589.849	523.969	406.671	575.405	493.533	485.952	471.681		16.3784	487.492	499.502	529.391	437.079	567.849	501.969	384.671	553.405	471.533	463.952	449.681		16.3784	0.947769	0.942118	0.939923	0.962079	0.9903	0.940493	0.947608	0.960125	0.946948	0.968629	0.936054	0.952913	0.0161083	0.00485682
16.4042	512.831	521.927	549.536	460.636	583.704	530.676	408.213	578.722	496.581	483.789	472.816		16.4042	490.831	499.927	527.536	438.636	561.704	508.676	386.213	556.722	474.581	461.789	450.816		16.4042	0.95426	0.942919	0.93663	0.965506	0.979584	0.953059	0.951407	0.96588	0.953069	0.964113	0.938417	0.954986	0.0130212	0.00392604
16.4426	513.129	517.481	552.041	454.684	580.179	516.932	408.193	577.154	488.824	491.766	476.128		16.4426	491.129	495.481	530.041	432.684	558.179	494.932	386.193	555.154	466.824	469.766	454.128		16.4426	0.95484	0.934534	0.941077	0.952405	0.973436	0.927308	0.951358	0.96316	0.937491	0.980767	0.945311	0.951062	0.0164313	0.00495423	0.00495423
16.4647	519.001	519.422	550.092	449.367	579.263	526.8	396.513	579.878	492.255	503.266	480.512		16.4647	497.001	497.422	528.092	427.367	557.263	504.8	374.513	557.878	470.255	481.266	458.512		16.4647	0.966256	0.938195	0.937617	0.940701	0.971839	0.945797	0.922585	0.967886	0.944381	1.00478	0.954437	0.954043	0.0225421	0.00679671
16.5031	511.582	531.033	553.039	451.299	583.99	536.189	401.859	575.231	499.331	490.049	478.146		16.5031	489.582	509.033	531.039	429.299	561.99	514.189	379.859	553.231	477.331	468.049	456.146		16.5031	0.951832	0.960094	0.942849	0.944954	0.980083	0.963388	0.935754	0.959823	0.958592	0.977182	0.949512	0.956733	0.0137104	0.00413385
16.5289	510.936	524.863	562.172	457.959	582.255	529.25	400.188	576.337	494.298	482.849	470.518		16.5289	488.936	502.863	540.172	435.959	560.255	507.25	378.188	554.337	472.298	460.849	448.518		16.5289	0.950576	0.948457	0.959065	0.959613	0.977057	0.950387	0.931638	0.961742	0.948484	0.96215	0.933633	0.952982	0.0130558	0.00393646
16.5674	513.201	525.201	553.074	449.564	588.463	525.457	412.043	577.281	489.445	471.908	472.474		16.5674	491.201	503.201	531.074	427.564	566.463	503.457	390.043	555.281	467.445	449.908	450.474		16.5674	0.95498	0.949094	0.942911	0.941135	0.987883	0.943281	0.960842	0.96338	0.938738	0.939308	0.937705	0.950842	0.0152179	0.00458837	0.00458837
16.5895	512.833	527.146	556.517	453.558	578.034	533.708	406.191	575.932	496.787	491.145	479.639		16.5895	490.833	505.146	534.517	431.558	556.034	511.708	384.191	553.932	474.787	469.145	457.639		16.5895	0.954264	0.952763	0.949024	0.949926	0.969696	0.95874	0.946426	0.96104	0.953483	0.979471	0.95262	0.957041	0.00983816	0.00296632
16.6279	506.308	520.15	550.219	457.744	585.908	539.317	402.833	576.949	487.23	480.126	487.409		16.6279	484.308	498.15	528.219	435.744	563.908	517.317	380.833	554.949	465.23	458.126	465.409		16.6279	0.941579	0.939568	0.937842	0.95914	0.983427	0.969249	0.938154	0.962804	0.93429	0.956465	0.968794	0.953756	0.0164011	0.00494511
16.6537	514.11	530.659	553.937	453.964	579.582	532.021	402.741	585.976	488.026	488.797	481.999		16.6537	492.11	508.659	531.937	431.964	557.582	510.021	380.741	563.976	466.026	466.797	459.999		16.6537	0.956747	0.959389	0.944443	0.95082	0.972395	0.955579	0.937927	0.978465	0.935889	0.974569	0.957532	0.956705	0.0142087	0.00428408
16.6921	513.539	528.68	548.587	452.817	587.85	532.557	395.237	576.352	491.05	488.911	475.242		16.6921	491.539	506.68	526.587	430.817	565.85	510.557	373.237	554.352	469.05	466.911	453.242		16.6921	0.955637	0.955656	0.934945	0.948295	0.986814	0.956583	0.919442	0.961768	0.941962	0.974807	0.943467	0.95267	0.0184621	0.00556653	0.00556653
16.7142	513.381	524.163	555.215	448.907	584.154	532.192	397.48	579.809	495.514	486.486	483.315		16.7142	491.381	502.163	533.215	426.907	562.154	510.192	375.48	557.809	473.514	464.486	461.315		16.7142	0.95533	0.947137	0.946713	0.939688	0.980369	0.9559	0.924967	0.967766	0.950926	0.969744	0.960272	0.954437	0.0152731	0.004605
16.7526	506.84	523.851	550.35	454.501	586.049	528.129	400.857	574.216	485.988	491.296	476.665		16.7526	484.84	501.851	528.35	432.501	564.049	506.129	378.857	552.216	463.988	469.296	454.665		16.7526	0.942613	0.946548	0.938075	0.952002	0.983673	0.948287	0.933286	0.958062	0.931796	0.979786	0.946429	0.95096	0.0170737	0.0051479
16.7784	515.579	530.914	556.198	454.78	593.33	540.442	399.068	574.285	499.979	482.67	454.043		16.7784	493.579	508.914	534.198	432.78	571.33	518.442	377.068	552.285	477.979	460.67	432.043		16.7784	0.959603	0.95987	0.948458	0.952616	0.996371	0.971357	0.928879	0.958182	0.959893	0.961777	0.899339	0.954213	0.0243436	0.00733988
16.8168	517.702	526.762	549.608	449.918	594.33	540.491	404.085	571.473	489.853	490.354	473.376		16.8168	495.702	504.762	527.608	427.918	572.33	518.491	382.085	549.473	467.853	468.354	451.376		16.8168	0.96373	0.952039	0.936757	0.941914	0.998115	0.971449	0.941238	0.953303	0.939558	0.977819	0.939583	0.955955	0.0197424	0.00595255	0.00595255
16.839	508.538	523.656	552.476	449.188	580.567	540.113	400.513	569.978	503.799	486.191	470.01		16.839	486.538	501.656	530.476	427.188	558.567	518.113	378.513	547.978	481.799	464.191	448.01		16.839	0.945914	0.94618	0.941849	0.940307	0.974113	0.97074	0.932439	0.95071	0.967564	0.969128	0.932576	0.951956	0.0156463	0.00471752
16.8774	514.224	536.346	556.758	448.916	595.007	546.939	405.073	576.022	496.485	491.166	469.038		16.8774	492.224	514.346	534.758	426.916	573.007	524.939	383.073	554.022	474.485	469.166	447.038		16.8774	0.956969	0.970115	0.949452	0.939708	0.999296	0.98353	0.943672	0.961196	0.952876	0.979514	0.930553	0.960626	0.0207238	0.00624846
16.905	509.187	526.336	552.488	448.021	592.996	538.554	393.718	583.476	500.622	492.697	474.619		16.905	487.187	504.336	530.488	426.021	570.996	516.554	371.718	561.476	478.622	470.697	452.619		16.905	0.947176	0.951235	0.941871	0.937738	0.995789	0.96782	0.9157	0.974128	0.961184	0.982711	0.94217	0.956138	0.0228925	0.00690235
16.9434	505.531	528.764	545.138	456.556	579.178	529.401	409.997	583.006	493.116	491.839	468.638		16.9434	483.531	506.764	523.138	434.556	557.178	507.401	387.997	561.006	471.116	469.839	446.638		16.9434	0.940068	0.955815	0.928821	0.956525	0.971691	0.95067	0.955802	0.973313	0.946111	0.98092	0.92972	0.953587	0.0170662	0.00514567	0.00514567
16.9655	506.882	529.195	552.682	461.39	585.487	526.422	401.222	578.941	503.166	485.093	475.129		16.9655	484.882	507.195	530.682	439.39	563.487	504.422	379.222	556.941	481.166	463.093	453.129		16.9655	0.942695	0.956628	0.942215	0.967166	0.982693	0.945089	0.934185	0.96626	0.966293	0.966835	0.943232	0.955754	0.0151346	0.00456327
17.004	509.575	533.802	552.868	458.312	588.222	536.338	400.045	578.6	486.765	493.793	474.804		17.004	487.575	511.802	530.868	436.312	566.222	514.338	378.045	556.6	464.765	471.793	452.804		17.004	0.94793	0.965317	0.942545	0.96039	0.987463	0.963668	0.931286	0.965668	0.933356	0.984999	0.942555	0.956834	0.0190578	0.00574615
17.0298	503.175	534.97	557.859	466.34	577.411	527.284	401.046	578.348	487.753	492.032	475.778		17.0298	481.175	512.97	535.859	444.34	555.411	505.284	379.046	556.348	465.753	470.032	453.778		17.0298	0.935487	0.96752	0.951407	0.978061	0.968609	0.946704	0.933752	0.965231	0.93534	0.981323	0.944583	0.955274	0.0175485	0.00529106
17.0682	502.914	516.607	559.315	459.834	587.52	537.669	406.066	569.471	498.027	486.905	471.953		17.0682	480.914	494.607	537.315	437.834	565.52	515.669	384.066	547.471	476.027	464.905	449.953		17.0682	0.93498	0.932885	0.953992	0.963741	0.986239	0.966161	0.946118	0.94983	0.955973	0.970618	0.936621	0.954287	0.0165844	0.00500038	0.00500038
17.0903	521.789	518.726	567.766	463.232	576.786	522.568	396.964	574.499	492.288	487.81	480.979		17.0903	499.789	496.726	545.766	441.232	554.786	500.568	374.964	552.499	470.288	465.81	458.979		17.0903	0.971676	0.936882	0.968997	0.97122	0.967519	0.937868	0.923696	0.958553	0.944448	0.972508	0.955409	0.955343	0.0171024	0.00515656
17.1287	519.027	526.976	553.591	462.88	579.952	525.149	400.325	570.857	495.028	488.597	477.3		17.1287	497.027	504.976	531.591	440.88	557.952	503.149	378.325	548.857	473.028	466.597	455.3		17.1287	0.966306	0.952442	0.943829	0.970445	0.97304	0.942704	0.931976	0.952235	0.94995	0.974151	0.947751	0.954985	0.0139891	0.00421788
17.1545	504.547	526.024	560.875	465.224	569.789	530.763	411.435	575.472	490.078	486.01	474.204		17.1545	482.547	504.024	538.875	443.224	547.789	508.763	389.435	553.472	468.078	464.01	452.204		17.1545	0.938155	0.950647	0.956762	0.975605	0.955317	0.953222	0.959344	0.960242	0.94001	0.96875	0.941306	0.954487	0.0117404	0.00353987
17.1929	515.139	525.492	557.8	455.188	576.674	528.662	405.554	574.491	492.949	472.736	470.501		17.1929	493.139	503.492	535.8	433.188	554.674	506.662	383.554	552.491	470.949	450.736	448.501		17.1929	0.958748	0.949643	0.951302	0.953514	0.967324	0.949286	0.944857	0.95854	0.945775	0.941037	0.933598	0.950329	0.00925587	0.00279075	0.00279075
17.215	510.302	524.002	563.784	459.381	582.455	533.643	402.66	589.838	501.695	483.974	478.423		17.215	488.302	502.002	541.784	437.381	560.455	511.643	380.66	567.838	479.695	461.974	456.423		17.215	0.949344	0.946833	0.961927	0.962743	0.977406	0.958618	0.937728	0.985166	0.963339	0.964499	0.950088	0.95979	0.0136439	0.00411378
17.2534	507.543	529.147	553.823	459.627	576.295	529.639	407.81	575.473	498.935	498.848	480.059		17.2534	485.543	507.147	531.823	437.627	554.295	507.639	385.81	553.473	476.935	476.848	458.059		17.2534	0.94398	0.956537	0.944241	0.963285	0.966663	0.951116	0.950414	0.960243	0.957796	0.995553	0.953494	0.958484	0.0142441	0.00429475
17.2792	503.663	532.645	558.269	456.445	590.465	530.289	403.634	579.354	499.786	481.727	473.842		17.2792	481.663	510.645	536.269	434.445	568.465	508.289	381.634	557.354	477.786	459.727	451.842		17.2792	0.936436	0.963135	0.952135	0.956281	0.991375	0.952334	0.940127	0.966977	0.959505	0.959808	0.940553	0.956242	0.0153319	0.00462274
17.3176	506.379	530.881	555.443	452.87	588.254	528.545	404.905	575.121	506.211	477.845	479.147		17.3176	484.379	508.881	533.443	430.87	566.254	506.545	382.905	553.121	484.211	455.845	457.147		17.3176	0.941717	0.959808	0.947117	0.948412	0.987519	0.949067	0.943258	0.959633	0.972408	0.951703	0.951596	0.955658	0.0137035	0.00413177	0.00413177
17.3398	512.652	519.971	558.557	456.626	593.401	527.688	404.241	586.543	505.426	494.452	492.117		17.3398	490.652	497.971	536.557	434.626	571.401	505.688	382.241	564.543	483.426	472.452	470.117		17.3398	0.953912	0.93923	0.952646	0.956679	0.996495	0.947461	0.941622	0.979449	0.970832	0.986375	0.978594	0.963936	0.0193053	0.00582077
17.3782	508.55	535.899	551.345	447.491	582.248	524.839	399.529	582.888	507.328	483.262	478.529		17.3782	486.55	513.899	529.345	425.491	560.248	502.839	377.529	560.888	485.328	461.262	456.529		17.3782	0.945937	0.969272	0.939841	0.936572	0.977045	0.942123	0.930015	0.973108	0.974652	0.963013	0.950309	0.954717	0.0171192	0.00516163
17.404	505.727	527.597	558.545	457.234	592.115	527.826	404.284	572.849	495.892	485.63	476.266		17.404	483.727	505.597	536.545	435.234	570.115	505.826	382.284	550.849	473.892	463.63	454.266		17.404	0.940449	0.953614	0.952625	0.958018	0.994252	0.947719	0.941728	0.955691	0.951685	0.967957	0.945598	0.955394	0.0150476	0.00453701
17.4424	507.664	532.269	547.044	453.938	579.147	523.404	407.961	574.531	503.844	498.282	480.666		17.4424	485.664	510.269	525.044	431.938	557.147	501.404	385.961	552.531	481.844	476.282	458.666		17.4424	0.944215	0.962426	0.932205	0.950762	0.971637	0.939434	0.950786	0.958609	0.967655	0.994371	0.954757	0.956987	0.0171048	0.00515728	0.00515728
17.4645	497.373	519.247	552.799	456.982	583.23	527.206	403.924	574.299	492.071	493.978	485.425		17.4645	475.373	497.247	530.799	434.982	561.23	505.206	381.924	552.299	470.071	471.978	463.425		17.4645	0.924207	0.937865	0.942423	0.957463	0.978757	0.946558	0.940841	0.958206	0.944012	0.985385	0.964664	0.952762	0.0182614	0.00550601
17.5029	521.206	528.263	561.71	457.447	588.497	528.257	392.521	566.561	500.135	498.681	488.998		17.5029	499.206	506.263	539.71	435.447	566.497	506.257	370.521	544.561	478.135	476.681	466.998		17.5029	0.970543	0.95487	0.958244	0.958486	0.987943	0.948527	0.912751	0.944781	0.960206	0.995204	0.972101	0.960332	0.0221448	0.00667692
17.5287	501.366	522.322	563.99	459.74	590.083	521.284	408.703	566.587	498.123	491.335	470.392		17.5287	479.366	500.322	541.99	437.74	568.083	499.284	386.703	544.587	476.123	469.335	448.392		17.5287	0.93197	0.943664	0.962292	0.963534	0.990708	0.935462	0.952614	0.944827	0.956166	0.979867	0.933371	0.954043	0.0190482	0.00574325
17.5671	510.897	527.193	551.978	452.449	578.918	535.099	396.59	580.424	503.189	484.741	472.548		17.5671	488.897	505.193	529.978	430.449	556.918	513.099	374.59	558.424	481.189	462.741	450.548		17.5671	0.9505	0.952852	0.940965	0.947485	0.971237	0.961346	0.922775	0.968833	0.966339	0.966101	0.937859	0.953299	0.0152508	0.00459828	0.00459828
17.5892	508.217	524.181	556.525	453.1	573.769	530.162	400.672	559.035	495.855	484.991	474.132		17.5892	486.217	502.181	534.525	431.1	551.769	508.162	378.672	537.035	473.855	462.991	452.132		17.5892	0.94529	0.947171	0.949038	0.948918	0.962258	0.952096	0.93283	0.931724	0.951611	0.966622	0.941156	0.948065	0.0106379	0.00320746
17.6277	506.278	524.656	554.408	454.022	579.308	529.675	404.586	564.528	495.632	498.7	483.897		17.6277	484.278	502.656	532.408	432.022	557.308	507.675	382.586	542.528	473.632	476.7	461.897		17.6277	0.94152	0.948067	0.94528	0.950947	0.971917	0.951184	0.942472	0.941254	0.951163	0.995244	0.961483	0.954594	0.0163151	0.0049192
17.6535	508.496	520.367	551.908	457.099	585.269	532.657	399.991	581.238	497.069	484.391	474.635		17.6535	486.496	498.367	529.908	435.099	563.269	510.657	377.991	559.238	475.069	462.391	452.635		17.6535	0.945832	0.939977	0.940841	0.95772	0.982313	0.956771	0.931153	0.970245	0.954049	0.96537	0.942203	0.953316	0.0151949	0.00458144
17.6919	495.075	532.261	556.269	456.607	585.275	524.414	399.383	577.727	517.047	489.17	467.52		17.6919	473.075	510.261	534.269	434.607	563.275	502.414	377.383	555.727	495.047	467.17	445.52		17.6919	0.91974	0.96241	0.948584	0.956637	0.982324	0.941327	0.929655	0.964154	0.99417	0.975347	0.927393	0.954704	0.0238981	0.00720556	0.00720556
17.714	507.034	522.755	563.391	458.864	580.94	535.67	403.111	570.793	496.91	494.192	472.586		17.714	485.034	500.755	541.391	436.864	558.94	513.67	381.111	548.793	474.91	472.192	450.586		17.714	0.94299	0.944481	0.961229	0.961605	0.974763	0.962416	0.938839	0.952124	0.95373	0.985832	0.937938	0.955995	0.0151156	0.00455753
17.7524	513.543	520.812	559.789	457.404	586.001	531.739	398.34	571.231	499.01	493.114	470.41		17.7524	491.543	498.812	537.789	435.404	564.001	509.739	376.34	549.231	477.01	471.114	448.41		17.7524	0.955645	0.940816	0.954834	0.958392	0.98359	0.955051	0.927086	0.952884	0.957947	0.983581	0.933409	0.954839	0.0176229	0.00531351
17.78	508.197	531.009	559.092	461.475	583.206	531.271	403.658	585.567	495.029	492.195	477.883		17.78	486.197	509.009	537.092	439.475	561.206	509.271	381.658	563.567	473.029	470.195	455.883		17.78	0.945251	0.960049	0.953596	0.967353	0.978715	0.954174	0.940186	0.977756	0.949952	0.981663	0.948964	0.959787	0.0144782	0.00436535
17.8185	511.282	525.304	557.527	460.433	579.54	527.914	404.576	573.398	498.605	491.886	480.956		17.8185	489.282	503.304	535.527	438.433	557.54	505.914	382.576	551.398	476.605	469.886	458.956		17.8185	0.951249	0.949289	0.950817	0.965059	0.972322	0.947884	0.942448	0.956643	0.957134	0.981018	0.955361	0.957202	0.0114218	0.0034438	0.0034438
17.8406	509.812	522.622	564.786	448.973	587.894	528.488	401.828	570.845	505.287	496.193	472.692		17.8406	487.812	500.622	542.786	426.973	565.894	506.488	379.828	548.845	483.287	474.193	450.692		17.8406	0.948391	0.94423	0.963706	0.939834	0.986891	0.94896	0.935678	0.952214	0.970553	0.99001	0.938159	0.956239	0.0190641	0.00574805
17.879	510.525	527.773	561.666	460.123	587.269	522.8	405.282	575.07	501.54	496.715	472.711		17.879	488.525	505.773	539.666	438.123	565.269	500.8	383.282	553.07	479.54	474.715	450.711		17.879	0.949777	0.953946	0.958166	0.964377	0.985801	0.938303	0.944187	0.959544	0.963028	0.9911	0.938198	0.958766	0.0172781	0.00520954
17.9048	516.96	530.773	559.802	445.874	592.756	530.17	398.936	575.775	502.11	486.533	481.039		17.9048	494.96	508.773	537.802	423.874	570.756	508.17	376.936	553.775	480.11	464.533	459.039		17.9048	0.962288	0.959604	0.954857	0.933012	0.99537	0.952111	0.928554	0.960767	0.964173	0.969842	0.955534	0.957828	0.0177348	0.00534725
17.9432	511.114	528.698	554.763	451.15	585.046	530.017	405.764	573.236	503.051	489.115	468.363		17.9432	489.114	506.698	532.763	429.15	563.046	508.017	383.764	551.236	481.051	467.115	446.363		17.9432	0.950922	0.95569	0.94591	0.944626	0.981924	0.951825	0.945374	0.956362	0.966062	0.975232	0.929148	0.954825	0.0149553	0.00450919	0.00450919
17.9653	515.177	517.605	554.357	444.611	569.525	536.141	398.642	577.594	499.244	486.167	477.432		17.9653	493.177	495.605	532.357	422.611	547.525	514.141	376.642	555.594	477.244	464.167	455.432		17.9653	0.958821	0.934768	0.945189	0.930232	0.954856	0.963298	0.92783	0.963923	0.958417	0.969078	0.948026	0.950403	0.0143055	0.00431327
18.0037	510.689	515.663	551.549	444.77	582.268	536.162	399.325	574.62	494.502	491.778	483.646		18.0037	488.689	493.663	529.549	422.77	560.268	514.162	377.325	552.62	472.502	469.778	461.646		18.0037	0.950096	0.931105	0.940204	0.930582	0.977079	0.963338	0.929512	0.958763	0.948894	0.980792	0.960961	0.951939	0.018072	0.00544892
18.0295	513.509	529.876	556.704	448.619	581.538	530.416	398.501	572.731	493.391	487.752	481.348		18.0295	491.509	507.876	534.704	426.619	559.538	508.416	376.501	550.731	471.391	465.752	459.348		18.0295	0.955579	0.957912	0.949356	0.939055	0.975806	0.952572	0.927482	0.955486	0.946663	0.972387	0.956177	0.953498	0.013563	0.00408941
18.0679	506.489	526.302	549.09	445.197	582.91	538.059	411.453	582.047	487.277	486.524	467.983		18.0679	484.489	504.302	527.09	423.197	560.91	516.059	389.453	560.047	465.277	464.524	445.983		18.0679	0.94193	0.951171	0.935838	0.931522	0.978199	0.966892	0.959389	0.971649	0.934384	0.969823	0.928357	0.951741	0.0182146	0.00549191	0.00549191
18.0901	509.446	520.547	554.406	450.976	590.177	538.004	402.351	567.428	484.319	490.404	492.648		18.0901	487.446	498.547	532.406	428.976	568.177	516.004	380.351	545.428	462.319	468.404	470.648		18.0901	0.947679	0.940316	0.945276	0.944243	0.990872	0.966789	0.936966	0.946286	0.928444	0.977924	0.979699	0.954954	0.0203646	0.00614015
18.1285	510.285	517.022	550.502	461.2	598.523	529.82	405.509	582.023	494.491	491.7	469.028		18.1285	488.285	495.022	528.502	439.2	576.523	507.82	383.509	560.023	472.491	469.7	447.028		18.1285	0.949311	0.933668	0.938345	0.966747	1.00543	0.951455	0.944746	0.971607	0.948872	0.980629	0.930532	0.956485	0.0226011	0.00681448
18.1543	515.142	529.98	558.907	457.152	582.093	529.582	405.878	575.445	504.444	490.801	475.514		18.1543	493.142	507.98	536.907	435.152	560.093	507.582	383.878	553.445	482.444	468.801	453.514		18.1543	0.958753	0.958108	0.953268	0.957837	0.976774	0.95101	0.945655	0.960195	0.96886	0.978752	0.944033	0.959386	0.0114197	0.00344318
18.1927	515.762	525.56	544.628	450.245	594.788	533.558	402.943	572.6	500.902	497.903	480.932		18.1927	493.762	503.56	522.628	428.245	572.788	511.558	380.943	550.6	478.902	475.903	458.932		18.1927	0.959959	0.949772	0.927915	0.942634	0.998914	0.958459	0.938425	0.955259	0.961747	0.99358	0.955311	0.958361	0.021362	0.00644089	0.00644089
18.2148	503.915	524.024	547.406	451.488	581.23	525.333	401.486	579.287	502.838	498.801	468.129		18.2148	481.915	502.024	525.406	429.488	559.23	503.333	379.486	557.287	480.838	476.801	446.129		18.2148	0.936926	0.946875	0.932848	0.94537	0.975269	0.943049	0.934836	0.96686	0.965635	0.995455	0.92866	0.95198	0.0210243	0.00633908
18.2532	522.602	517.701	550.639	451.792	592.123	525.115	405.718	576.943	506.028	481.056	477.907		18.2532	500.602	495.701	528.639	429.792	570.123	503.115	383.718	554.943	484.028	459.056	455.907		18.2532	0.973257	0.934949	0.938588	0.946039	0.994266	0.94264	0.945261	0.962794	0.972041	0.958407	0.949014	0.956114	0.0180538	0.00544342
18.279	514.925	526.622	554.459	453.574	582.01	536.491	409.777	580.372	506.42	503.812	480.068		18.279	492.925	504.622	532.459	431.574	560.01	514.491	387.777	558.372	484.42	481.812	458.068		18.279	0.958331	0.951775	0.94537	0.949961	0.97663	0.963954	0.95526	0.968743	0.972828	1.00592	0.953513	0.963844	0.0171137	0.00515997
18.3174	515.963	532.178	549.87	456.03	580.684	520.421	408.363	577.085	498.213	502.276	480.993		18.3174	493.963	510.178	527.87	434.03	558.684	498.421	386.363	555.085	476.213	480.276	458.993		18.3174	0.96035	0.962254	0.937223	0.955367	0.974317	0.933845	0.951777	0.96304	0.956346	1.00271	0.955438	0.959333	0.0183433	0.00553072	0.00553072
18.3395	517.802	528.659	557.043	450.068	582.036	529.336	406.844	582.778	485.301	484.927	467.451		18.3395	495.802	506.659	535.043	428.068	560.036	507.336	384.844	560.778	463.301	462.927	445.451		18.3395	0.963925	0.955617	0.949958	0.942244	0.976675	0.950549	0.948035	0.972917	0.930416	0.966489	0.927249	0.953098	0.0161058	0.00485609
18.378	510.23	532.745	554.095	453.482	598.217	527.607	405.781	582.062	496.817	498.182	482.48		18.378	488.23	510.745	532.095	431.482	576.217	505.607	383.781	560.062	474.817	476.182	460.48		18.378	0.949204	0.963323	0.944724	0.949759	1.00489	0.947309	0.945416	0.971675	0.953543	0.994162	0.958533	0.962049	0.0203864	0.00614674
18.4038	515.98	533.612	561.388	459.439	585.293	524.923	409.725	579.344	500.956	494.07	477.97		18.4038	493.98	511.612	539.388	437.439	563.293	502.923	387.725	557.344	478.956	472.07	455.97		18.4038	0.960383	0.964959	0.957673	0.962871	0.982355	0.94228	0.955132	0.966959	0.961855	0.985577	0.949145	0.962654	0.0127368	0.00384029
18.4422	517.666	515.593	554.637	447.999	583.309	532.905	404.58	577.836	496.337	488.034	479.087		18.4422	495.666	493.593	532.637	425.999	561.309	510.905	382.58	555.836	474.337	466.034	457.087		18.4422	0.96366	0.930973	0.945686	0.93769	0.978895	0.957236	0.942457	0.964343	0.952579	0.972976	0.951471	0.95436	0.0148196	0.00446829	0.00446829
18.4643	515.72	521.054	555.026	447.001	593.814	530.004	413.84	577.731	493.567	500.62	475.806		18.4643	493.72	499.054	533.026	425.001	571.814	508.004	391.84	555.731	471.567	478.62	453.806		18.4643	0.959877	0.941273	0.946377	0.935493	0.997215	0.9518	0.965269	0.964161	0.947016	0.999252	0.944641	0.959307	0.0213872	0.00644848
18.5027	507.304	527.721	549.967	452.799	586.097	530.508	418.74	579.617	497.191	492.43	471.224		18.5027	485.304	505.721	527.967	430.799	564.097	508.508	396.74	557.617	475.191	470.43	449.224		18.5027	0.943515	0.953847	0.937395	0.948255	0.983757	0.952744	0.977339	0.967433	0.954294	0.982153	0.935103	0.957803	0.0173828	0.0052411
18.5285	517.384	529.567	558.845	448.47	589.024	532.945	406.104	584.098	495.716	494.836	478.081		18.5285	495.384	507.567	536.845	426.47	567.024	510.945	384.104	562.098	473.716	472.836	456.081		18.5285	0.963112	0.957329	0.953157	0.938727	0.988862	0.95731	0.946212	0.975207	0.951332	0.987177	0.949377	0.960709	0.0164281	0.00495326
18.5669	510.612	526.31	543.025	448.308	590.953	522.61	403.161	593.521	499.977	490.561	481.791		18.5669	488.612	504.31	521.025	426.308	568.953	500.61	381.161	571.521	477.977	468.561	459.791		18.5669	0.949946	0.951186	0.925069	0.93837	0.992226	0.937947	0.938962	0.991555	0.959889	0.978251	0.957099	0.956409	0.0224269	0.00676197	0.00676197
18.589	504.012	524.388	551.086	449.296	581.552	520.107	405.949	583.485	494.647	487.99	477.148		18.589	482.012	502.388	529.086	427.296	559.552	498.107	383.949	561.485	472.647	465.99	455.148		18.589	0.937115	0.947561	0.939382	0.940545	0.975831	0.933257	0.94583	0.974144	0.949185	0.972884	0.947434	0.951197	0.0156113	0.004707
18.6274	512.557	522.759	556.874	448.795	592.564	521.13	396.005	581.294	499.303	486.172	479.549		18.6274	490.557	500.759	534.874	426.795	570.564	499.13	374.005	559.294	477.303	464.172	457.549		18.6274	0.953728	0.944489	0.949658	0.939442	0.995035	0.935174	0.921334	0.970342	0.958535	0.969088	0.952432	0.953569	0.0198556	0.00598669
18.6551	507.318	520.203	553.631	454.389	586.587	530.24	404.273	585.484	498.343	479.531	472.055		18.6551	485.318	498.203	531.631	432.389	564.587	508.24	382.273	563.484	476.343	457.531	450.055		18.6551	0.943542	0.939668	0.9439	0.951755	0.984612	0.952242	0.941701	0.977612	0.956608	0.955223	0.936833	0.953063	0.0153757	0.00463594
18.6935	509.595	524.899	553.513	454.224	595.823	525.981	403.349	587.277	495.732	484.644	477.357		18.6935	487.595	502.899	531.513	432.224	573.823	503.981	381.349	565.277	473.732	462.644	455.357		18.6935	0.947969	0.948525	0.943691	0.951392	1.00072	0.944263	0.939425	0.980723	0.951364	0.965898	0.947869	0.956531	0.0187058	0.00564001	0.00564001
18.7156	515.124	523.122	548.538	457.106	577.458	534.866	411.741	580.068	488.784	485.629	470.161		18.7156	493.124	501.122	526.538	435.106	555.458	512.866	389.741	558.068	466.784	463.629	448.161		18.7156	0.958718	0.945173	0.934858	0.957736	0.968691	0.96091	0.960098	0.968215	0.937411	0.967954	0.93289	0.953878	0.0137796	0.00415471
18.754	513.362	521.868	559.551	452.204	580.396	522.76	395.387	575.598	500.419	499.095	473.132		18.754	491.362	499.868	537.551	430.204	558.396	500.76	373.387	553.598	478.419	477.095	451.132		18.754	0.955293	0.942808	0.954411	0.946946	0.973815	0.938228	0.919811	0.96046	0.960777	0.996068	0.939075	0.953426	0.0201586	0.00607805
18.7798	511.833	517.772	552.115	455.628	576.433	525.959	397.222	582.263	503.4	488.383	470.249		18.7798	489.833	495.772	530.115	433.628	554.433	503.959	375.222	560.263	481.4	466.383	448.249		18.7798	0.95232	0.935083	0.941209	0.954482	0.966904	0.944221	0.924331	0.972024	0.966763	0.973704	0.933073	0.951283	0.0170283	0.00513421
18.8182	513.627	528.971	548.877	459.782	583.001	514.328	408.661	579.957	502.671	488.539	475.761		18.8182	491.627	506.971	526.877	437.782	561.001	492.328	386.661	557.957	480.671	466.539	453.761		18.8182	0.955808	0.956205	0.93546	0.963626	0.978358	0.922429	0.952511	0.968023	0.965299	0.97403	0.944547	0.956027	0.0167524	0.00505104	0.00505104
18.8404	506.76	522.504	552.676	456.697	582.689	525.192	402.112	584.877	492.434	499.52	478.425		18.8404	484.76	500.504	530.676	434.697	560.689	503.192	380.112	562.877	470.434	477.52	456.425		18.8404	0.942457	0.944008	0.942205	0.956835	0.977814	0.942784	0.936378	0.976559	0.944741	0.996956	0.950093	0.95553	0.019527	0.0058876
18.8788	513.213	515.397	553.647	470.772	591.222	529.491	403.527	583.572	500.171	494.989	473.677		18.8788	491.213	493.397	531.647	448.772	569.222	507.491	381.527	561.572	478.171	472.989	451.677		18.8788	0.955003	0.930603	0.943929	0.987817	0.992695	0.950839	0.939863	0.974295	0.960279	0.987496	0.940209	0.960275	0.0219792	0.00662698
18.9046	517.754	527.51	547.738	460.406	578.796	532.861	409.896	570.346	491.178	490.857	475.532		18.9046	495.754	505.51	525.738	438.406	556.796	510.861	387.896	548.346	469.178	468.857	453.532		18.9046	0.963832	0.953449	0.933437	0.965	0.971024	0.957153	0.955553	0.951348	0.942219	0.978869	0.944071	0.955996	0.0132743	0.00400234
18.943	508.217	526.312	555.592	461.782	581.196	531.943	404.668	571.702	494.618	494.666	479.547		18.943	486.217	504.312	533.592	439.782	559.196	509.943	382.668	549.702	472.618	472.666	457.547		18.943	0.94529	0.95119	0.947382	0.968028	0.97521	0.955433	0.942674	0.953701	0.949127	0.986822	0.952428	0.957026	0.0138109	0.00416413	0.00416413
18.9651	500.407	530.385	557.118	465.957	581.86	530.59	410.353	582.786	498.953	493.513	474.94		18.9651	478.407	508.385	535.118	443.957	559.86	508.59	388.353	560.786	476.953	471.513	452.94		18.9651	0.930106	0.958872	0.950091	0.977218	0.976368	0.952898	0.956679	0.972931	0.957833	0.984415	0.942838	0.960023	0.0163751	0.00493728
19.0035	512.691	522.516	554.899	459.207	577.954	521.245	404.28	584.832	496.69	489.787	480.816		19.0035	490.691	500.516	532.899	437.207	555.954	499.245	382.28	562.832	474.69	467.787	458.816		19.0035	0.953988	0.94403	0.946151	0.96236	0.969556	0.935389	0.941718	0.976481	0.953288	0.976635	0.95507	0.955879	0.0139665	0.00421107
19.0293	510.034	522.75	551.362	468.548	583.289	524.863	399.817	585.895	503.009	490.644	476.841		19.0293	488.034	500.75	529.362	446.548	561.289	502.863	377.817	563.895	481.009	468.644	454.841		19.0293	0.948823	0.944472	0.939872	0.982921	0.97886	0.942168	0.930724	0.978325	0.965978	0.978425	0.946795	0.957942	0.0191472	0.00577309
19.0677	513.311	528.918	551.955	457.163	588.382	531.825	401.997	589.427	497.087	488.312	485.283		19.0677	491.311	506.918	529.955	435.163	566.382	509.825	379.997	567.427	475.087	466.312	463.283		19.0677	0.955194	0.956105	0.940924	0.957861	0.987742	0.955212	0.936094	0.984453	0.954085	0.973556	0.964368	0.960509	0.0161359	0.00486515	0.00486515
19.0898	514.913	529.374	559.711	463.909	592.372	526.475	405.086	587.888	488.58	485.695	472.801		19.0898	492.913	507.374	537.711	441.909	570.372	504.475	383.086	565.888	466.58	463.695	450.801		19.0898	0.958308	0.956965	0.954695	0.97271	0.9947	0.945188	0.943704	0.981783	0.937001	0.968092	0.938386	0.95923	0.0184943	0.00557625
19.1282	515.394	526.009	553.52	461.346	584.469	518.812	407.423	582.346	499.232	495.687	481.769		19.1282	493.394	504.009	531.52	439.346	562.469	496.812	385.423	560.346	477.232	473.687	459.769		19.1282	0.959243	0.950618	0.943703	0.967069	0.980918	0.930831	0.949461	0.972168	0.958393	0.988953	0.957053	0.959855	0.0167362	0.00504615
19.154	518.535	528.512	550.632	451.426	577.596	526.924	403.064	580.725	488.024	494.124	467.586		19.154	496.535	506.512	528.632	429.426	555.596	504.924	381.064	558.725	466.024	472.124	445.586		19.154	0.96535	0.955339	0.938575	0.945233	0.968932	0.946029	0.938723	0.969355	0.935885	0.98569	0.92753	0.952422	0.0179074	0.00539928
19.1925	518.053	521.138	555.883	454.866	575.537	520.127	401.865	576.133	504.921	495.431	473.193		19.1925	496.053	499.138	533.883	432.866	553.537	498.127	379.865	554.133	482.921	473.431	451.193		19.1925	0.964413	0.941431	0.947899	0.952805	0.965341	0.933295	0.935769	0.961388	0.969818	0.988419	0.939202	0.954525	0.0170298	0.00513469	0.00513469
19.2146	515.018	521.237	556.431	454.554	588.67	518.533	401.113	579.809	498.374	497.852	472.348		19.2146	493.018	499.237	534.431	432.554	566.67	496.533	379.113	557.809	476.374	475.852	450.348		19.2146	0.958512	0.941618	0.948871	0.952118	0.988244	0.930308	0.933917	0.967766	0.95667	0.993473	0.937443	0.955358	0.0208554	0.00628813
19.253	509.248	521.857	549.662	462.143	592.39	512.908	404.99	579.015	489.893	499.404	478.479		19.253	487.248	499.857	527.662	440.143	570.39	490.908	382.99	557.015	467.893	477.404	456.479		19.253	0.947294	0.942787	0.936853	0.968823	0.994732	0.919769	0.943467	0.966388	0.939638	0.996714	0.950205	0.955152	0.0241043	0.00726773
19.2788	510.037	527.78	558.967	461.05	584.717	527.079	397.491	584.048	502.947	497.728	481.392		19.2788	488.037	505.78	536.967	439.05	562.717	505.079	375.491	562.048	480.947	475.728	459.392		19.2788	0.948828	0.953959	0.953374	0.966417	0.98135	0.94632	0.924994	0.97512	0.965853	0.993214	0.956269	0.960518	0.0186865	0.00563418
19.3172	520.429	536.984	545.884	446.043	589.614	535.073	400.91	571.98	492.775	496.141	470.735		19.3172	498.429	514.984	523.884	424.043	567.614	513.073	378.91	549.98	470.775	474.141	448.735		19.3172	0.969032	0.971319	0.930146	0.933384	0.989891	0.961297	0.933417	0.954183	0.945426	0.989901	0.934085	0.955644	0.0223927	0.00675165	0.00675165
19.3393	510.379	531.526	559.035	452.871	582.499	531.494	405.273	574.301	498.714	494.623	471.203		19.3393	488.379	509.526	537.035	430.871	560.499	509.494	383.273	552.301	476.714	472.623	449.203		19.3393	0.949493	0.961024	0.953495	0.948414	0.977482	0.954592	0.944165	0.95821	0.957353	0.986732	0.935059	0.956911	0.0145448	0.00438542
19.3777	512.349	530.096	563.933	461.45	598.045	518.387	404.286	581.733	494.461	503.565	473.967		19.3777	490.349	508.096	541.933	439.45	576.045	496.387	382.286	559.733	472.461	481.565	451.967		19.3777	0.953323	0.958327	0.962191	0.967298	1.00459	0.930034	0.941733	0.971104	0.948812	1.0054	0.940813	0.962148	0.0243983	0.00735635
19.4035	512.993	525.138	565.934	458.599	591.025	528.018	399.474	586.338	504.619	494.441	467.154		19.4035	490.993	503.138	543.934	436.599	569.025	506.018	377.474	564.338	482.619	472.441	445.154		19.4035	0.954575	0.948976	0.965744	0.961022	0.992351	0.948079	0.929879	0.979093	0.969211	0.986352	0.926631	0.960174	0.0213025	0.00642295
19.4419	519.13	520.351	564.802	454.581	593.054	523.001	410.128	581.11	495.474	490.321	480.448		19.4419	497.13	498.351	542.802	432.581	571.054	501.001	388.128	559.11	473.474	468.321	458.448		19.4419	0.966507	0.939947	0.963734	0.952178	0.99589	0.938679	0.956124	0.970023	0.950846	0.97775	0.954304	0.960544	0.0167505	0.00505046	0.00505046
19.4641	510.67	527.808	555.414	456.149	580.646	532.185	398.853	577.655	505.671	497.783	474.223		19.4641	488.67	505.808	533.414	434.149	558.646	510.185	376.853	555.655	483.671	475.783	452.223		19.4641	0.950059	0.954012	0.947066	0.955629	0.974251	0.955887	0.928349	0.964029	0.971324	0.993329	0.941346	0.957753	0.0175801	0.00530059
19.5025	515.191	533.756	552.408	458.989	584.103	525.784	397.578	588.516	497.067	487.044	478.112		19.5025	493.191	511.756	530.408	436.989	562.103	503.784	375.578	566.516	475.067	465.044	456.112		19.5025	0.958849	0.96523	0.941729	0.961881	0.98028	0.943894	0.925208	0.982872	0.954045	0.970909	0.949441	0.957667	0.0172522	0.00520175
19.5301	509.832	538.344	560.472	462.276	587.027	523.767	399.032	573.23	480.639	491.423	483.787		19.5301	487.832	516.344	538.472	440.276	565.027	501.767	377.032	551.23	458.639	469.423	461.787		19.5301	0.94843	0.973884	0.956046	0.969116	0.985379	0.940114	0.92879	0.956352	0.921054	0.980051	0.961254	0.956406	0.0205684	0.00620161
19.5685	513.321	527.728	559.762	456.236	577.951	524.438	400.531	575.289	498.834	490.666	482.4		19.5685	491.321	505.728	537.762	434.236	555.951	502.438	378.531	553.289	476.834	468.666	460.4		19.5685	0.955213	0.953861	0.954786	0.955821	0.969551	0.941372	0.932483	0.959924	0.957594	0.978471	0.958367	0.956131	0.0121887	0.00367503	0.00367503
19.5906	513.224	531.111	551.197	457.708	590.259	520.572	399.117	575.815	504.382	487.51	477.612		19.5906	491.224	509.111	529.197	435.708	568.259	498.572	377.117	553.815	482.382	465.51	455.612		19.5906	0.955024	0.960241	0.939579	0.959061	0.991015	0.934128	0.929	0.960837	0.968735	0.971882	0.9484	0.956173	0.0179629	0.00541603
19.6291	512.443	527.85	552.578	461.547	575.99	518.361	396.492	588.699	501.281	494.531	468.52		19.6291	490.443	505.85	530.578	439.547	553.99	496.361	374.492	566.699	479.281	472.531	446.52		19.6291	0.953506	0.954091	0.942031	0.967511	0.966131	0.929986	0.922533	0.98319	0.962508	0.98654	0.929474	0.954318	0.0215028	0.00648335
19.6549	507.549	533.449	556.962	455.282	586.247	532.503	400.42	575.046	496.847	502.148	475.032		19.6549	485.549	511.449	534.962	433.282	564.247	510.503	378.42	553.046	474.847	480.148	453.032		19.6549	0.943991	0.964651	0.949814	0.953721	0.984019	0.956482	0.93221	0.959502	0.953603	1.00244	0.94303	0.958497	0.0197189	0.00594546
19.6933	504.685	540.205	559.741	465.236	579.211	525.509	397.743	580.357	492.929	486.272	475.312		19.6933	482.685	518.205	537.741	443.236	557.211	503.509	375.743	558.357	470.929	464.272	453.312		19.6933	0.938423	0.977394	0.954748	0.975631	0.971748	0.943378	0.925615	0.968717	0.945735	0.969297	0.943613	0.955845	0.0175534	0.00529256	0.00529256
19.7154	513.453	533.511	553.614	463.387	587.571	518.162	391.297	575.029	493.608	498.538	481.659		19.7154	491.453	511.511	531.614	441.387	565.571	496.162	369.297	553.029	471.608	476.538	459.659		19.7154	0.95547	0.964768	0.94387	0.971561	0.986328	0.929613	0.909736	0.959473	0.947099	0.994906	0.956824	0.956332	0.0241398	0.00727842
19.7538	511.069	531.546	546.936	456.385	584.582	526.121	396.767	581.483	489.198	485.782	476.659		19.7538	489.069	509.546	524.936	434.385	562.582	504.121	374.767	559.483	467.198	463.782	454.659		19.7538	0.950835	0.961062	0.932013	0.956149	0.981115	0.944525	0.923211	0.97067	0.938242	0.968274	0.946417	0.952047	0.0175111	0.00527979
19.7796	515.676	523.336	553.059	462.433	587.709	530.83	400.697	576.712	498.524	487.987	475.158		19.7796	493.676	501.336	531.059	440.433	565.709	508.83	378.697	554.712	476.524	465.987	453.158		19.7796	0.959792	0.945577	0.942885	0.969461	0.986568	0.953348	0.932892	0.962393	0.956971	0.972877	0.943292	0.956914	0.0155905	0.00470071
19.818	523.169	529.084	560.354	464.934	579.288	520.482	404.01	587.241	495.771	484.727	466.993		19.818	501.169	507.084	538.354	442.934	557.288	498.482	382.01	565.241	473.771	462.727	444.993		19.818	0.974359	0.956418	0.955837	0.974966	0.971882	0.93396	0.941053	0.98066	0.951442	0.966071	0.926296	0.95754	0.0180138	0.00543137	0.00543137
19.8401	511.267	526.516	559.753	459.371	583.798	529.498	399.369	586.47	504.488	487.286	477.39		19.8401	489.267	504.516	537.753	437.371	561.798	507.498	377.369	564.47	482.488	465.286	455.39		19.8401	0.95122	0.951575	0.95477	0.962721	0.979748	0.950852	0.92962	0.979322	0.968948	0.971414	0.947938	0.958921	0.0151519	0.00456846
19.8785	519.514	525.82	557.646	456.625	584	521.881	415.789	587.244	507.577	492.176	473.872		19.8785	497.514	503.82	535.646	434.625	562	499.881	393.789	565.244	485.577	470.176	451.872		19.8785	0.967253	0.950262	0.951029	0.956677	0.9801	0.936581	0.97007	0.980665	0.975152	0.981623	0.940615	0.96273	0.0164646	0.00496426
19.9043	505.499	529.89	556.685	445.419	586.61	519.69	399.764	574.076	490.367	481.004	470.123		19.9043	483.499	507.89	534.685	423.419	564.61	497.69	377.764	552.076	468.367	459.004	448.123		19.9043	0.940006	0.957938	0.949322	0.932011	0.984652	0.932476	0.930594	0.95782	0.94059	0.958298	0.932811	0.946956	0.0166839	0.00503038
19.9428	512.621	530.829	553.848	451.649	580.986	511.824	410.008	578.401	494.044	493.165	478.169		19.9428	490.621	508.829	531.848	429.649	558.986	489.824	388.008	556.401	472.044	471.165	456.169		19.9428	0.953852	0.95971	0.944285	0.945724	0.974844	0.917738	0.955829	0.965323	0.947974	0.983688	0.94956	0.954412	0.017355	0.00523274	0.00523274
19.9649	506.911	530.52	560.414	459.843	576.24	523.035	402.715	579.728	494.635	494.889	486.923		19.9649	484.911	508.52	538.414	437.843	554.24	501.035	380.715	557.728	472.635	472.889	464.923		19.9649	0.942751	0.959127	0.955943	0.96376	0.966567	0.938743	0.937863	0.967625	0.949161	0.987287	0.967782	0.957874	0.0149832	0.00451761
20.0033	513.019	526.347	554.439	456.059	590.356	525.464	404.767	578.633	500.748	490.236	470.837		20.0033	491.019	504.347	532.439	434.059	568.356	503.464	382.767	556.633	478.748	468.236	448.837		20.0033	0.954626	0.951256	0.945335	0.955431	0.991185	0.943294	0.942918	0.965726	0.961437	0.977573	0.934297	0.956643	0.0166282	0.0050136
20.0291	514.849	522.308	554.496	465.202	594.096	525.735	397.351	585.757	490.996	491.678	475.727		20.0291	492.849	500.308	532.496	443.202	572.096	503.735	375.351	563.757	468.996	469.678	453.727		20.0291	0.958184	0.943638	0.945436	0.975556	0.997707	0.943802	0.924649	0.978085	0.941853	0.980583	0.944476	0.957634	0.0221776	0.00668679
20.0675	516.236	525.149	556.373	456.847	576.756	516.981	414.92	584.914	493.238	495.752	479.514		20.0675	494.236	503.149	534.373	434.847	554.756	494.981	392.92	562.914	471.238	473.752	457.514		20.0675	0.96088	0.948996	0.948769	0.957166	0.967467	0.9274	0.967929	0.976623	0.946356	0.989089	0.952359	0.958458	0.0166682	0.00502564	0.00502564
20.0896	514.348	531.103	554.793	453.855	577.54	527.564	397.353	575.935	483.22	486.905	475.601		20.0896	492.348	509.103	532.793	431.855	555.54	505.564	375.353	553.935	461.22	464.905	453.601		20.0896	0.95721	0.960226	0.945963	0.95058	0.968834	0.947229	0.924654	0.961045	0.926237	0.970618	0.944214	0.950619	0.0152284	0.00459154
20.128	512.903	529.487	555.694	450.396	574.033	515.874	406.557	576.609	491.992	495.61	469.073		20.128	490.903	507.487	533.694	428.396	552.033	493.874	384.557	554.609	469.992	473.61	447.073		20.128	0.9544	0.957178	0.947563	0.942966	0.962718	0.925326	0.947328	0.962214	0.943853	0.988793	0.930626	0.951179	0.0171928	0.00518382
20.1538	512.484	533.089	555.004	464.011	575.86	527.297	401.126	586.349	493.857	502.591	471.476		20.1538	490.484	511.089	533.004	442.011	553.86	505.297	379.126	564.349	471.857	480.591	449.476		20.1538	0.953586	0.963972	0.946338	0.972935	0.965904	0.946728	0.933949	0.979112	0.947599	1.00337	0.935628	0.959011	0.0206969	0.00624034
20.1922	514.423	534.396	550.234	462.075	586.183	518.517	399.5	586.741	498.663	492.002	473.234		20.1922	492.423	512.396	528.234	440.075	564.183	496.517	377.5	564.741	476.663	470.002	451.234		20.1922	0.957356	0.966437	0.937869	0.968673	0.983907	0.930278	0.929943	0.979793	0.95725	0.98126	0.939287	0.957459	0.0204478	0.00616523	0.00616523
20.2144	502.278	531.763	556.59	460.024	593.019	518.647	386.74	580.638	491.055	493.806	467.337		20.2144	480.278	509.763	534.59	438.024	571.019	496.647	364.74	558.638	469.055	471.806	445.337		20.2144	0.933744	0.961471	0.949154	0.964159	0.995829	0.930522	0.89851	0.969204	0.941972	0.985026	0.927012	0.9506	0.0281292	0.00848128
20.2528	503.536	523.88	558.831	454.963	581.996	522.312	404.79	580.413	501.34	485.877	477.953		20.2528	481.536	501.88	536.831	432.963	559.996	500.312	382.79	558.413	479.34	463.877	455.953		20.2528	0.936189	0.946603	0.953133	0.953019	0.976605	0.937388	0.942975	0.968814	0.962626	0.968472	0.94911	0.954085	0.013451	0.00405562
20.2786	510.152	526.362	559.92	458.4	584.61	514.645	406.145	587.158	496.281	483.411	472.848		20.2786	488.152	504.362	537.92	436.4	562.61	492.645	384.145	565.158	474.281	461.411	450.848		20.2786	0.949052	0.951284	0.955066	0.960584	0.981164	0.923023	0.946313	0.980516	0.952467	0.963324	0.938484	0.954661	0.0169151	0.00510008
20.317	504.923	534.608	555.06	461.484	597.013	521.706	399.827	576.424	495.775	495.83	471.677		20.317	482.923	512.608	533.06	439.484	575.013	499.706	377.827	554.424	473.775	473.83	449.677		20.317	0.938886	0.966837	0.946437	0.967372	1.00279	0.936253	0.930749	0.961893	0.95145	0.989252	0.936046	0.957088	0.0232263	0.007003	0.007003
20.3391	514.845	530.28	554.087	456.506	579.254	537.148	405.73	579.743	499.12	494.93	470.753		20.3391	492.845	508.28	532.087	434.506	557.254	515.148	383.73	557.743	477.12	472.93	448.753		20.3391	0.958176	0.958674	0.94471	0.956415	0.971823	0.965185	0.94529	0.967651	0.958168	0.987373	0.934123	0.958872	0.0144969	0.00437097
20.3775	505.679	531.561	554.278	454.038	594.149	525.243	401.32	577.211	499.765	496.527	473.171		20.3775	483.679	509.561	532.278	432.038	572.149	503.243	379.32	555.211	477.765	474.527	451.171		20.3775	0.940356	0.96109	0.945049	0.950983	0.997799	0.94288	0.934427	0.963259	0.959463	0.990707	0.939156	0.956833	0.0208467	0.0062855
20.4052	496.885	525.77	557.87	460.054	585.754	525.318	401.651	576.73	499.362	494.846	472.75		20.4052	474.885	503.77	535.87	438.054	563.754	503.318	379.651	554.73	477.362	472.846	450.75		20.4052	0.923259	0.950168	0.951426	0.964225	0.983159	0.94302	0.935242	0.962424	0.958654	0.987198	0.93828	0.954278	0.0195819	0.00590418
20.4436	505.758	525.249	546.479	459.181	588.517	511.941	406.202	578.426	500.347	496.935	468.007		20.4436	483.758	503.249	524.479	437.181	566.517	489.941	384.202	556.426	478.347	474.935	446.007		20.4436	0.940509	0.949185	0.931202	0.962303	0.987977	0.917957	0.946453	0.965367	0.960632	0.991559	0.928407	0.952868	0.0235142	0.0070898	0.0070898
20.4657	502.401	523.023	553.923	456.634	587.68	526.076	406.759	573.589	501.748	483.49	474.681		20.4657	480.401	501.023	531.923	434.634	565.68	504.076	384.759	551.589	479.748	461.49	452.681		20.4657	0.933983	0.944987	0.944419	0.956697	0.986518	0.944441	0.947825	0.956975	0.963446	0.963489	0.942299	0.953189	0.0144419	0.00435441	0.00435441
20.5041	504.339	532.857	555.143	454.615	582.921	523.463	400.839	578.065	484.977	496.046	467.507		20.5041	482.339	510.857	533.143	432.615	560.921	501.463	378.839	556.065	462.977	474.046	445.507		20.5041	0.93775	0.963535	0.946585	0.952253	0.978218	0.939545	0.933242	0.96474	0.929766	0.989703	0.927366	0.951155	0.0205841	0.00620635	0.00620635
20.5299	499.78	529.822	559.394	457.775	591.011	520.309	401.82	581.29	484.906	490.985	470.406		20.5299	477.78	507.822	537.394	435.775	569.011	498.309	379.82	559.29	462.906	468.985	448.406		20.5299	0.928887	0.95781	0.954132	0.959208	0.992327	0.933636	0.935658	0.970335	0.929623	0.979137	0.9334	0.952196	0.0218492	0.00658778	0.00658778
20.5683	516.562	520.722	558.427	459.693	581.13	521.776	405.289	585.171	492.963	493.948	474.594		20.5683	494.562	498.722	536.427	437.693	559.13	499.776	383.289	563.171	470.963	471.948	452.594		20.5683	0.961514	0.940647	0.952415	0.96343	0.975095	0.936384	0.944204	0.977069	0.945803	0.985323	0.942118	0.956727	0.0167848	0.00506082	0.00506082
20.5904	509.041	524.135	565.783	447.041	584.289	521.136	412.912	570.616	481.829	487.42	479.933		20.5904	487.041	502.135	543.783	425.041	562.289	499.136	390.912	548.616	459.829	465.42	457.933		20.5904	0.946892	0.947084	0.965476	0.935581	0.980604	0.935185	0.962983	0.951817	0.923444	0.971694	0.953232	0.952181	0.0171099	0.00515883	0.00515883
20.6288	505.836	518.761	557.484	446.004	582.055	515.253	414.01	568.032	495.702	490.039	466.585		20.6288	483.836	496.761	535.484	424.004	560.055	493.253	392.01	546.032	473.702	468.039	444.585		20.6288	0.940661	0.936948	0.950741	0.933299	0.976708	0.924163	0.965687	0.947334	0.951304	0.977162	0.925447	0.948132	0.0186416	0.00562066	0.00562066
20.6546	507.475	515.946	558.619	461.799	593.727	527.398	399.269	564.855	493.303	490.166	477.186		20.6546	485.475	493.946	536.619	439.799	571.727	505.398	377.269	542.855	471.303	468.166	455.186		20.6546	0.943847	0.931638	0.952756	0.968066	0.997063	0.946918	0.929374	0.941822	0.946486	0.977427	0.947514	0.952992	0.0202436	0.00610367	0.00610367
20.693	509.918	527.851	552.271	457.622	593.455	528.531	404.334	575.86	492.852	497.803	471.177		20.693	487.918	505.851	530.271	435.622	571.455	506.531	382.334	553.86	470.852	475.803	449.177		20.693	0.948597	0.954093	0.941485	0.958872	0.996589	0.94904	0.941851	0.960915	0.94558	0.993371	0.935005	0.956854	0.020336	0.00613153	0.00613153
20.7152	508.001	526.826	557.306	459.398	581.56	535.569	402.707	573.797	498.485	483.53	467.977		20.7152	486.001	504.826	535.306	437.398	559.56	513.569	380.707	551.797	476.485	461.53	445.977		20.7152	0.94487	0.952159	0.950425	0.962781	0.975845	0.962227	0.937843	0.957335	0.956893	0.963572	0.928344	0.953845	0.0132349	0.00399046	0.00399046
20.7536	509.202	522.287	556.483	462.585	587.996	525.745	402.22	578.626	487.863	491.898	466.335		20.7536	487.202	500.287	534.483	440.585	565.996	503.745	380.22	556.626	465.863	469.898	444.335		20.7536	0.947205	0.943598	0.948964	0.969796	0.987069	0.94382	0.936644	0.965714	0.935561	0.981043	0.924926	0.953122	0.0199323	0.00600981	0.00600981
20.7794	512.254	526.135	554.088	466.497	574.979	533.792	399.711	573.787	502.779	483.083	477.066		20.7794	490.254	504.135	532.088	444.497	552.979	511.792	377.711	551.787	480.779	461.083	455.066		20.7794	0.953139	0.950856	0.944712	0.978407	0.964368	0.958897	0.930463	0.957318	0.965516	0.962639	0.947264	0.95578	0.0126762	0.00382201	0.00382201
20.8178	509.416	526.266	549.681	461.445	594.834	529.786	407.453	585.66	499.938	485.562	477.44		20.8178	487.416	504.266	527.681	439.445	572.834	507.786	385.453	563.66	477.938	463.562	455.44		20.8178	0.947621	0.951103	0.936887	0.967287	0.998994	0.951392	0.949535	0.977917	0.959811	0.967815	0.948042	0.959673	0.0174579	0.00526376	0.00526376
20.8399	502.292	529.124	562.215	456.067	583.309	525.484	402.225	579.535	492.338	480.737	472.423		20.8399	480.292	507.124	540.215	434.067	561.309	503.484	380.225	557.535	470.338	458.737	450.423		20.8399	0.933771	0.956494	0.959141	0.955449	0.978895	0.943331	0.936656	0.967291	0.944548	0.957741	0.937599	0.951901	0.0140673	0.00424144	0.00424144
20.8783	500.193	531.764	558.835	449.627	573.631	524.538	404.73	580.075	482.673	492.895	463.93		20.8783	478.193	509.764	536.835	427.627	551.631	502.538	382.73	558.075	460.673	470.895	441.93		20.8783	0.92969	0.961473	0.95314	0.941273	0.962017	0.941559	0.942827	0.968227	0.925139	0.983124	0.91992	0.948035	0.0195119	0.00588307	0.00588307
20.9041	501.857	519.95	559.299	456.936	586.718	526.709	408.982	582.935	492.187	489.795	475.621		20.9041	479.857	497.95	537.299	434.936	564.718	504.709	386.982	560.935	470.187	467.795	453.621		20.9041	0.932925	0.93919	0.953964	0.957362	0.98484	0.945627	0.953301	0.973189	0.944245	0.976652	0.944256	0.95505	0.0166007	0.00500529	0.00500529
20.9425	516.006	526.814	563.442	449.278	584.228	519.794	411.788	573.618	491.852	488.827	468.645		20.9425	494.006	504.814	541.442	427.278	562.228	497.794	389.788	551.618	469.852	466.827	446.645		20.9425	0.960433	0.952137	0.961319	0.940505	0.980498	0.932671	0.960214	0.957025	0.943572	0.974631	0.929735	0.953885	0.0161506	0.00486959	0.00486959
20.9646	507.179	532.833	549.236	452.919	593.64	515.335	402.656	575.73	488.361	495.556	477.533		20.9646	485.179	510.833	527.236	430.919	571.64	493.335	380.656	553.73	466.361	473.556	455.533		20.9646	0.943272	0.963489	0.936097	0.94852	0.996912	0.924316	0.937718	0.960689	0.936561	0.98868	0.948236	0.953135	0.0226272	0.00682235	0.00682235
21.0031	504.675	525.362	552.041	460.913	579.594	520.618	410.836	576.57	488.345	487.772	472.666		21.0031	482.675	503.362	530.041	438.913	557.594	498.618	388.836	554.57	466.345	465.772	450.666		21.0031	0.938404	0.949398	0.941077	0.966116	0.972416	0.934214	0.957869	0.962146	0.936529	0.972429	0.938105	0.9517	0.0149315	0.004502	0.004502
21.0289	517.526	516.924	553.8	462.743	576.786	522.911	403.966	585.423	504.651	492.524	472.501		21.0289	495.526	494.924	531.8	440.743	554.786	500.911	381.966	563.423	482.651	470.524	450.501		21.0289	0.963388	0.933483	0.9442	0.970144	0.967519	0.938511	0.940945	0.977506	0.969275	0.98235	0.937761	0.956826	0.0179563	0.00541404	0.00541404
21.0673	501.167	529.363	563.302	461.29	589.778	529.442	406.98	585.005	489.139	489.984	465.808		21.0673	479.167	507.363	541.302	439.29	567.778	507.442	384.98	563.005	467.139	467.984	443.808		21.0673	0.931584	0.956944	0.961071	0.966945	0.990177	0.950747	0.94837	0.976781	0.938124	0.977047	0.923829	0.956511	0.0205496	0.00619595	0.00619595
21.0894	510.91	524.269	553.419	450.865	589.647	530.33	414.561	582.905	488.536	488.095	475.09		21.0894	488.91	502.269	531.419	428.865	567.647	508.33	392.561	560.905	466.536	466.095	453.09		21.0894	0.950526	0.947337	0.943524	0.943998	0.989948	0.952411	0.967045	0.973137	0.936913	0.973103	0.94315	0.956463	0.0167491	0.00505005	0.00505005
21.1278	513.371	523.015	543.367	458.792	583.436	528.914	392.489	584.192	496.391	486.371	466.037		21.1278	491.371	501.015	521.367	436.792	561.436	506.914	370.489	562.192	474.391	464.371	444.037		21.1278	0.95531	0.944971	0.925677	0.961447	0.979116	0.949758	0.912672	0.97537	0.952687	0.969504	0.924306	0.950074	0.0216996	0.00654268	0.00654268
21.1536	501.678	522.03	548.183	450.338	591.013	519.994	407.345	590.382	494.578	486.255	464.555		21.1536	479.678	500.03	526.183	428.338	569.013	497.994	385.345	568.382	472.578	464.255	442.555		21.1536	0.932577	0.943114	0.934227	0.942838	0.99233	0.933045	0.949269	0.98611	0.949047	0.969261	0.921221	0.950276	0.0228782	0.00689803	0.00689803
21.192	512.224	525.152	554.527	463.771	576.959	522.835	413.246	587.808	490.318	492.528	468.804		21.192	490.224	503.152	532.527	441.771	554.959	500.835	391.246	565.808	468.318	470.528	446.804		21.192	0.95308	0.949002	0.945491	0.972406	0.967821	0.938368	0.963805	0.981644	0.940491	0.982358	0.930066	0.956776	0.0179094	0.0053999	0.0053999
21.2141	500.783	526.244	563.677	456.899	577.241	533.985	405.621	587.45	496.098	497.604	471.454		21.2141	478.783	504.244	541.677	434.899	555.241	511.985	383.621	565.45	474.098	475.604	449.454		21.2141	0.930837	0.951062	0.961737	0.95728	0.968313	0.959259	0.945022	0.981023	0.952099	0.992956	0.935582	0.957743	0.0183451	0.00553125	0.00553125
21.2525	506.723	524.041	548.634	454.545	581.487	532.755	399.12	581.955	495.292	498.57	473.121		21.2525	484.723	502.041	526.634	432.545	559.487	510.755	377.12	559.955	473.292	476.57	451.121		21.2525	0.942385	0.946907	0.935028	0.952099	0.975717	0.956954	0.929007	0.971489	0.95048	0.994972	0.939052	0.954008	0.0196831	0.00593467	0.00593467
21.2802	507.959	517.216	551.802	457.43	580.669	528.647	409.179	576.172	509.671	491.4	478.674		21.2802	485.959	495.216	529.802	435.43	558.669	506.647	387.179	554.172	487.671	469.4	456.674		21.2802	0.944788	0.934034	0.940653	0.958449	0.974291	0.949258	0.953787	0.961456	0.979357	0.980003	0.950611	0.956971	0.0155073	0.00467564	0.00467564
21.3186	510.727	536.67	559.397	456.924	578.332	533.853	396.934	567.97	502.847	490.305	478.945		21.3186	488.727	514.67	537.397	434.924	556.332	511.853	374.934	545.97	480.847	468.305	456.945		21.3186	0.95017	0.970726	0.954138	0.957335	0.970215	0.959012	0.923622	0.947226	0.965653	0.977717	0.951175	0.956999	0.0147298	0.0044412	0.0044412
21.3407	507.538	527.734	552.662	455.571	581.968	529.719	397.125	571.142	508.775	498.932	468.787		21.3407	485.538	505.734	530.662	433.571	559.968	507.719	375.125	549.142	486.775	476.932	446.787		21.3407	0.94397	0.953872	0.94218	0.954357	0.976556	0.951266	0.924093	0.952729	0.977557	0.995728	0.93003	0.954758	0.0212538	0.00640825	0.00640825
21.3791	505.575	527.777	543.311	450.991	589.026	533.174	405.268	568.848	510.397	489.892	474.277		21.3791	483.575	505.777	521.311	428.991	567.026	511.174	383.268	546.848	488.397	467.892	452.277		21.3791	0.940153	0.953953	0.925577	0.944276	0.988865	0.95774	0.944152	0.948749	0.980815	0.976855	0.941458	0.954781	0.0195964	0.00590855	0.00590855
21.4049	511.422	534.015	554.057	455.704	581.812	533.499	406.752	569.536	500.189	493.453	470.48		21.4049	489.422	512.015	532.057	433.704	559.812	511.499	384.752	547.536	478.189	471.453	448.48		21.4049	0.951521	0.965719	0.944656	0.95465	0.976284	0.958348	0.947808	0.949943	0.960315	0.984289	0.933554	0.957008	0.0144129	0.00434564	0.00434564
21.4433	507.914	526.943	546.882	454.116	584.449	543.063	411.142	580.799	493.299	483.945	471.817		21.4433	485.914	504.943	524.882	432.116	562.449	521.063	389.142	558.799	471.299	461.945	449.817		21.4433	0.944701	0.95238	0.931917	0.951154	0.980883	0.976268	0.958622	0.969484	0.946478	0.964439	0.936337	0.955697	0.015844	0.00477715	0.00477715
21.4655	510.105	531.872	548.944	460.058	586.673	534.288	408.801	582.612	506.377	499.088	472.618		21.4655	488.105	509.872	526.944	438.058	564.673	512.288	386.801	560.612	484.377	477.088	450.618		21.4655	0.948961	0.961677	0.935578	0.964234	0.984762	0.959827	0.952856	0.972629	0.972742	0.996054	0.938005	0.962484	0.0185496	0.00559291	0.00559291
21.5039	514.358	531.101	549.759	450.602	597.514	533.791	406.09	573.24	511.225	491.887	476.659		21.5039	492.358	509.101	527.759	428.602	575.514	511.791	384.09	551.24	489.225	469.887	454.659		21.5039	0.957229	0.960223	0.937025	0.943419	1.00367	0.958896	0.946177	0.956369	0.982478	0.98102	0.946417	0.961175	0.0200978	0.00605972	0.00605972
21.5297	516.403	537.342	552.591	450.365	586.456	537.45	400.672	572.396	495.195	487.016	475.364		21.5297	494.403	515.342	530.591	428.365	564.456	515.45	378.672	550.396	473.195	465.016	453.364		21.5297	0.961205	0.971994	0.942054	0.942898	0.984383	0.965751	0.93283	0.954905	0.950286	0.97085	0.943721	0.956443	0.0157784	0.00475737	0.00475737
21.5681	506.089	530.36	555.117	449.031	579.713	540.88	406.939	574.159	494.533	487.045	468.943		21.5681	484.089	508.36	533.117	427.031	557.713	518.88	384.939	552.159	472.533	465.045	446.943		21.5681	0.941153	0.958825	0.946539	0.939961	0.972624	0.972178	0.948269	0.957964	0.948956	0.970911	0.930355	0.95343	0.0142613	0.00429994	0.00429994
21.5902	508.378	528	547.985	454.821	586.411	531.036	401.197	573.729	494.201	490.207	467.1		21.5902	486.378	506	525.985	432.821	564.411	509.036	379.197	551.729	472.201	468.207	445.1		21.5902	0.945603	0.954374	0.933876	0.952706	0.984305	0.953734	0.934124	0.957218	0.948289	0.977512	0.926519	0.95166	0.0175545	0.00529288	0.00529288
21.6286	514.814	525.837	555.614	451.801	582.723	526.141	397.487	577.069	488.667	486.064	478.768		21.6286	492.814	503.837	533.614	429.801	560.723	504.141	375.487	555.069	466.667	464.064	456.768		21.6286	0.958116	0.950294	0.947421	0.946059	0.977873	0.944562	0.924984	0.963012	0.937176	0.968863	0.950807	0.951742	0.0147554	0.00444892	0.00444892
21.6544	508.425	522.202	562.453	448.73	578.16	528.866	413.358	565.959	505.666	484.91	472.234		21.6544	486.425	500.202	540.453	426.73	556.16	506.866	391.358	543.959	483.666	462.91	450.234		21.6544	0.945694	0.943438	0.959563	0.939299	0.969915	0.949668	0.964081	0.943737	0.971314	0.966453	0.937205	0.95367	0.0128154	0.003864	0.003864
21.6928	512.477	526.381	555.696	452.253	572.187	531.083	410.953	585.31	496.955	497.589	467.523		21.6928	490.477	504.381	533.696	430.253	550.187	509.083	388.953	563.31	474.955	475.589	445.523		21.6928	0.953572	0.95132	0.947567	0.947054	0.959499	0.953822	0.958157	0.97731	0.95382	0.992924	0.927399	0.956586	0.0168437	0.00507857	0.00507857
21.7149	499.716	526.186	554.297	451.403	593.854	540.045	395.954	585.98	496.062	477.759	467.997		21.7149	477.716	504.186	532.297	429.403	571.854	518.045	373.954	563.98	474.062	455.759	445.997		21.7149	0.928763	0.950952	0.945083	0.945183	0.997285	0.970613	0.921208	0.978472	0.952027	0.951524	0.928386	0.951772	0.0228884	0.00690112	0.00690112
21.7533	512.184	532.759	559.091	454.843	580.848	535.342	400.037	575.878	500.107	482.918	473.121		21.7533	490.184	510.759	537.091	432.843	558.848	513.342	378.037	553.878	478.107	460.918	451.121		21.7533	0.953003	0.96335	0.953594	0.952755	0.974603	0.961801	0.931266	0.960946	0.96015	0.962294	0.939052	0.95571	0.0119935	0.00361618	0.00361618
21.7792	510.887	521.791	562.533	449.811	582.905	525.659	404.495	568.234	494.089	494.612	470.693		21.7792	488.887	499.791	540.533	427.811	560.905	503.659	382.495	546.234	472.089	472.612	448.693		21.7792	0.950481	0.942663	0.959705	0.941678	0.97819	0.943659	0.942248	0.947684	0.948065	0.986709	0.933998	0.95228	0.0163342	0.00492494	0.00492494
21.8176	514.918	534.506	550.746	458.092	584.269	510.612	406.985	580.567	504.336	491.854	477.216		21.8176	492.918	512.506	528.746	436.092	562.269	488.612	384.985	558.567	482.336	469.854	455.216		21.8176	0.958318	0.966645	0.938778	0.959906	0.980569	0.915467	0.948382	0.969081	0.968643	0.980951	0.947576	0.957665	0.0193109	0.00582245	0.00582245
21.8397	509.692	529.644	562.442	459.238	568.561	528.94	393.429	569.622	496.317	490.995	474.762		21.8397	487.692	507.644	540.442	437.238	546.561	506.94	371.429	547.622	474.317	468.995	452.762		21.8397	0.948158	0.957474	0.959544	0.962429	0.953175	0.949807	0.914988	0.950092	0.952539	0.979157	0.942468	0.951803	0.0155512	0.00468886	0.00468886
21.8622	522.966	522.52	566.967	450.376	567.103	528.67	401.259	576.506	506.137	490.916	466.358		21.8622	500.966	500.52	544.967	428.376	545.103	506.67	379.259	554.506	484.137	468.916	444.358		21.8622	0.973965	0.944038	0.967578	0.942922	0.950632	0.949301	0.934276	0.962035	0.97226	0.978993	0.924974	0.954634	0.0175729	0.00529842	0.00529842
21.9006	512.795	533.709	559.269	453.39	570.834	535.92	402.801	593.081	494.771	489.831	467.539		21.9006	490.795	511.709	537.269	431.39	548.834	513.92	380.801	571.081	472.771	467.831	445.539		21.9006	0.95419	0.965142	0.95391	0.949556	0.957139	0.962884	0.938075	0.990792	0.949434	0.976727	0.927432	0.956844	0.0173038	0.00521731	0.00521731
21.9227	508.315	519.195	554.767	453.39	583.226	531.21	409.968	575.562	497.307	494.565	471.201		21.9227	486.315	497.195	532.767	431.39	561.226	509.21	387.968	553.562	475.307	472.565	449.201		21.9227	0.945481	0.937766	0.945917	0.949556	0.97875	0.95406	0.95573	0.960398	0.954527	0.986611	0.935055	0.954896	0.0157845	0.00475922	0.00475922
21.9611	517.095	532.121	555.279	464.606	577.294	533.235	395.743	572.225	506.606	490.945	478.1		21.9611	495.095	510.121	533.279	442.606	555.294	511.235	373.743	550.225	484.606	468.945	456.1		21.9611	0.96255	0.962146	0.946826	0.974244	0.968405	0.957854	0.920688	0.954608	0.973202	0.979053	0.949416	0.958999	0.0163573	0.00493192	0.00493192
21.9833	509.266	525.653	555.639	457.839	561.557	524.697	400.028	581.801	506.435	490.033	475.939		21.9833	487.266	503.653	533.639	435.839	539.557	502.697	378.028	559.801	484.435	468.033	453.939		21.9833	0.947329	0.949947	0.947465	0.959349	0.940961	0.941857	0.931244	0.971222	0.972858	0.977149	0.944918	0.953118	0.0149318	0.00450212	0.00450212
22.0217	513.491	531.257	545.346	448.866	578.67	526.083	403.439	582.178	497.087	496.658	479.501		22.0217	491.491	509.257	523.346	426.866	556.67	504.083	381.439	560.178	475.087	474.658	457.501		22.0217	0.955544	0.960517	0.92919	0.939598	0.970805	0.944454	0.939647	0.971876	0.954085	0.990981	0.952332	0.955366	0.0176542	0.00532294	0.00532294
22.0438	505.202	516.35	565.026	452.936	570.568	533.72	394.924	573.354	494.909	490.905	470.293		22.0438	483.202	494.35	543.026	430.936	548.568	511.72	372.924	551.354	472.909	468.905	448.293		22.0438	0.939428	0.9324	0.964132	0.948557	0.956675	0.958762	0.918671	0.956567	0.949711	0.97897	0.933165	0.948822	0.016961	0.00511393	0.00511393
22.0822	504.097	512.513	567.489	445.699	574.72	524.829	402.636	578.464	499.532	495.667	469.826		22.0822	482.097	490.513	545.489	423.699	552.72	502.829	380.636	556.464	477.532	473.667	447.826		22.0822	0.93728	0.925163	0.968505	0.932627	0.963916	0.942104	0.937668	0.965432	0.958995	0.988912	0.932193	0.950254	0.0199513	0.00601553	0.00601553
22.1043	509.986	517.477	556.791	459.765	583.586	528.388	402.251	572.293	496.231	496.883	477.041		22.1043	487.986	495.477	534.791	437.765	561.586	506.388	380.251	550.293	474.231	474.883	455.041		22.1043	0.948729	0.934526	0.949511	0.963589	0.979378	0.948772	0.93672	0.954726	0.952366	0.99145	0.947212	0.95518	0.0171043	0.00515713	0.00515713
22.1427	515.517	523.192	559.543	453.988	573.674	527.218	406.028	571.574	505.539	495.233	466.541		22.1427	493.517	501.192	537.543	431.988	551.674	505.218	384.028	549.574	483.539	473.233	444.541		22.1427	0.959482	0.945305	0.954397	0.950873	0.962092	0.94658	0.946024	0.953479	0.971059	0.988005	0.925355	0.954787	0.0160035	0.00482524	0.00482524
22.1648	503.958	520.077	551.498	457.118	585.756	527.606	410.872	576.482	501.913	485.419	465.915		22.1648	481.958	498.077	529.498	435.118	563.756	505.606	388.872	554.482	479.913	463.419	443.915		22.1648	0.93701	0.93943	0.940113	0.957762	0.983162	0.947307	0.957957	0.961994	0.963777	0.967516	0.924052	0.952735	0.0168532	0.00508143	0.00508143
22.2033	502.723	540.077	560.225	444.227	581.124	529.098	411.716	575.724	501.791	493.09	472.825		22.2033	480.723	518.077	538.225	422.227	559.124	507.098	389.716	553.724	479.791	471.09	450.825		22.2033	0.934609	0.977152	0.955608	0.929387	0.975084	0.950103	0.960036	0.960679	0.963532	0.983531	0.938436	0.957105	0.0177774	0.00536009	0.00536009
22.2291	504.719	526.469	561.669	454.977	577.692	529.42	400.602	573.686	504.588	496.919	472.11		22.2291	482.719	504.469	539.669	432.977	555.692	507.42	378.602	551.686	482.588	474.919	450.11		22.2291	0.938489	0.951486	0.958171	0.953049	0.969099	0.950706	0.932658	0.957143	0.969149	0.991525	0.936947	0.955311	0.0169674	0.00511587	0.00511587
22.2675	501.863	530.112	553.877	461.149	587.281	518.361	409.128	576.492	496.159	491.846	481.777		22.2675	479.863	508.112	531.877	439.149	565.281	496.361	387.128	554.492	474.159	469.846	459.777		22.2675	0.932937	0.958357	0.944337	0.966635	0.985822	0.929986	0.953661	0.962011	0.952222	0.980934	0.95707	0.956725	0.0173944	0.00524461	0.00524461
22.2896	504.203	520.689	567.142	458.75	580.843	526.838	396.911	588.358	514.001	488.513	469.109		22.2896	482.203	498.689	545.142	436.75	558.843	504.838	374.911	566.358	492.001	466.513	447.109		22.2896	0.937486	0.940584	0.967889	0.961354	0.974594	0.945868	0.923565	0.982598	0.988052	0.973976	0.9307	0.95697	0.0222227	0.00670039	0.00670039
22.328	511.722	529.332	552.742	448.414	591.223	520.17	412.783	575.057	507.238	484.488	474.385		22.328	489.722	507.332	530.742	426.414	569.223	498.17	390.783	553.057	485.238	462.488	452.385		22.328	0.952104	0.956886	0.942322	0.938603	0.992697	0.933375	0.962665	0.959522	0.974471	0.965572	0.941683	0.956354	0.0174855	0.00527209	0.00527209
22.3538	507.229	523.939	555.219	456.917	580.671	529.576	405.288	577.625	507.356	486.58	467.624		22.3538	485.229	501.939	533.219	434.917	558.671	507.576	383.288	555.625	485.356	464.58	445.624		22.3538	0.943369	0.946714	0.94672	0.95732	0.974294	0.950998	0.944201	0.963977	0.974708	0.96994	0.927609	0.954532	0.014909	0.00449524	0.00449524
22.3922	507.19	530.344	556.534	453.715	585.269	527.792	401.966	576.393	491.739	487.726	469.69		22.3922	485.19	508.344	534.534	431.715	563.269	505.792	379.966	554.393	469.739	465.726	447.69		22.3922	0.943293	0.958795	0.949054	0.950272	0.982313	0.947656	0.936018	0.961839	0.943345	0.972333	0.93191	0.952439	0.01521	0.00458599	0.00458599
22.4143	503.789	532.362	551.804	444.81	572.671	520.439	396.65	574.49	504.556	489.766	467.308		22.4143	481.789	510.362	529.804	422.81	550.671	498.439	374.65	552.49	482.556	467.766	445.308		22.4143	0.936681	0.962601	0.940656	0.93067	0.960343	0.933879	0.922922	0.958538	0.969085	0.976592	0.926951	0.947174	0.0186676	0.00562851	0.00562851
22.4527	509.167	527.463	566.111	453.985	581.092	522.276	396.794	568.721	500.73	492.007	460.101		22.4527	487.167	505.463	544.111	431.985	559.092	500.276	374.794	546.721	478.73	470.007	438.101		22.4527	0.947137	0.953361	0.966058	0.950866	0.975029	0.937321	0.923277	0.948529	0.961401	0.98127	0.911949	0.950563	0.0208176	0.00627675	0.00627675
[truncated: 282 more rows]

## Sheet: MRC5 XAB2-GFP UV 10Jm2 3h30
													average pre bleach													0
background	17													374.398	333.139	486.351	407.422	448.846	410.96	498.901	453.885	375.605	423.284	432.905
temps	1	2	3	4	5	6	7	8	9	10	11		temps	1	2	3	4	5	6	7	8	9	10	11		temps	1	2	3	4	5	6	7	8	9	10	11	moyenne	ecart	SEM	SEM
[truncated: 1,000 more rows]

## Sheet: MRC5 XAB2-GFP ATMi-UV
													average pre bleach												0
[truncated: 1,002 more rows]
