# Supplementary material for: XAB2 dynamics during DNA damage-dependent transcription inhibition
Source: eLife. 2022 Jul 26;11:e77094. doi: 10.7554/eLife.77094 (PMC9436415; doi:10.7554/eLife.77094)
Supplement: Figure 5—figure supplement 1—source data 1. [file elife-77094-fig5-figsupp1-data1.xlsx]

## Sheet: 29.01.20
	PLA							IF XAB2							IF AQR
Rawintden	NoUV	1h	2h	4h	16h	control		NoUV	1h	2h	4h	16h	control		NoUV	1h	2h	4h	16h	control
	8249960	15009728	23324415	25020759	1166690	858249
	8704117	16069382	28518139	25180843	8249960	1018828
	9060859	18362473	29167524	26851961	8704117	1140944
	9993403	20587317	30001601	27272190	9996064	1238901
	11732463	21791937	31095574	30050547	10000615	1260995
	11745908	22986390	31637726	31073228	10607837	1273554
	11773500	23067591	32719030	32255355	11735626	1280350
	11782593	23162103	33288960	33450825	11773500	1321274
	12423455	23440913	33545755	33549105	12423455	1357811
	12518534	23529833	34545374	34349496	12616788	1496270
	12616788	23617934	35003240	34386640	13067989	1535799
	12738688	23620571	35193035	34438369	13313032	1670324
	13067989	23718445	35450857	35137018	13427895	1758243
	13076002	23890236	35563627	35331760	13480784	1775979
	13313032	24300515	35606215	35822873	13482116	1784568
	13480784	24959230	36111163	36677638	14034700	1877154
	13565166	25081970	36264261	36699040	14408997	2037848
	14005111	25429680	37479372	36933573	14785209	2040882
	14034700	25610888	37860829	37328587	15586455	2137821
	14408997	25636813	38310044	38186013	15847913	2140446
	14785209	26083305	38835734	38369482	16467532	2183593
	15640390	26362292	39388404	38542692	16551395	2193775
	16467532	26848322	40349492	38577360	16614766	2256646
	16551395	26870788	40524685	38956517	16751382	2333695
	18377443	27353230	41074546	40927877	17180528	2385341
	18689880	27421584	41602488	42113610	17580114	2548301
	18719721	27703220	42834213	42836805	17581065	2558360
	18817159	27911908	43073820	43756847	18139789	2671032
	19238077	28764870	43159717	43931457	18377443	2685647
	19676954	29141443	43790464	43948935	18689880	2702403
	20467184	29155512	44012677	43977607	18817159	2727501
	20530019	29192836	44877056	44705832	19676954	2771197
	20911240	29323014	45333490	45502787	19810326	2810459
	20963000	29454929	46369218	45557691	20963000	2955594
	21010145	29524712	46553521	46797520	21045687	3027507
	21500359	29585198	46628738	47181395	21615362	3034313
	21630365	29595105	46998191	47628683	22074716	3034893
	22074716	29793558	47143895	47678056	23420956	3070217
	22385712	30065967	47483014	47805696	24459681	3088743
	22387657	30079827	48305178	48036820	24492391	3143323
	22657905	30891882	48321636	48098014	24720449	3205713
	22673207	31230311	48395874	49124732	25191993	3225182
	23277409	31280533	48880630	49743798	25583957	3236187
	23677589	31362215	49074476	49787360	25653395	3247139
	23779071	31381196	49977754	49876699	25947446	3346581
	24720449	31400759	50361387	50122193	26198877	3408901
	24935155	31723928	51002799	50319276	26939397	3411616
	25103454	32470039	51510854	51617810	27470388	3437065
	25111508	32608097	51546980	51624365	28020609	3493559
	25263907	32962303	51569548	51705416	28066539	3507851
	25546519	33345027	51732877	51746331	28956035	3618955
	25588964	33358794	52326136	52223402	29017910	3631939
	25639278	33492901	53407690	52337161	29357637	3667586
	25711696	33506653	53570072	52461119	29664932	3675570
	26170435	33571157	54305923	53858327	29780871	3726717
	26201800	34512426	54820244	54344143	29930186	3796241
	27110135	34692772	54848623	54532406	29943676	3848191
	27308933	34764073	55445984	55746622	30341797	3850426
	27649665	35032708	55809844	55890802	30351252	3859077
	27704895	35356154	56231289	56116563	30541711	3871804
	28457985	36215640	57133021	56922247	33238255	3933305
	28514302	36793152	57438975	59297316	34450422	4074281
	28587483	38120242	59640738	62503009	34762768	4199511
	29053007	38384388	60727881	62924984	34774497	4261009
	29386009	38492241	60820964	62972353	35819966	4343457
	29568750	38701961	60822283	63064472	36462078	4360359
	29694017	39024863	61009653	64065031	36613723	4493847
	30119207	39281560	61136172	64972923	38608339	4525767
	30154268	39366450	61332472	65268527	38657243	4528580
	30482262	39457147	61556936	66711408	44097167	4537672
	31389394	40091991	63343194	67609443	44468235	4678005
	31547673	40392648	63520023	68971928	44771386	4817467
	31738346	40742214	63806925	69450711	44894228	4882958
	32038463	40913869	66470877	69932907	46681951	4897101
	32459729	41337789	67457813	74873973	49688556	4910352
	33574143	42517456	67626554	75091540	55471088	5211286
	34014081	42976366	68400720	75501416	58176378	5357740
	34498595	43975879	68775250	80126561	63280544	5428753
	36479915	44046683	68879146	80572054	64671833	5476327
	36771776	45442612	69304262	83833334	64680897	6023364
	37714342	45810452	69770956	84594633	65182133	6224318
	39841627	48984963	70415321	87645874	65483435	6632739
		49164991	71930792	96835411	65499507	6760374
		50160215	74305175	97557169	68636490	6818313
		51022164	75502268	98700723	71675300	6832508
		51644139	77389544		72548554	7233364
		53054663	77472611		77707415	7257866
		58309039	78174750		100068488	7454686
		63488313			120240488	7792019
		71690136
Moyenne	2.25004e+07	3.36962e+07	5.06401e+07	5.19777e+07	3.14833e+07	3.53036e+06		#DIV/0!	#DIV/0!	#DIV/0!	#DIV/0!	#DIV/0!	#DIV/0!		#DIV/0!	#DIV/0!	#DIV/0!	#DIV/0!	#DIV/0!	#DIV/0!
SD	7.80955e+06	1.00719e+07	1.33507e+07	1.70549e+07	2.13079e+07	1.66135e+06		#DIV/0!	#DIV/0!	#DIV/0!	#DIV/0!	#DIV/0!	#DIV/0!		#DIV/0!	#DIV/0!	#DIV/0!	#DIV/0!	#DIV/0!	#DIV/0!
SEM	862421	1.06167e+06	1.42319e+06	1.84987e+06	2.25863e+06	176103		#DIV/0!	#DIV/0!	#DIV/0!	#DIV/0!	#DIV/0!	#DIV/0!		#DIV/0!	#DIV/0!	#DIV/0!	#DIV/0!	#DIV/0!	#DIV/0!
Par rapport à NoUV
Moyenne	100	149.758	225.063	231.008	139.923	15.6902		#DIV/0!	#DIV/0!	#DIV/0!	#DIV/0!	#DIV/0!	#DIV/0!		#DIV/0!	#DIV/0!	#DIV/0!	#DIV/0!	#DIV/0!	#DIV/0!
SD	34.7085	44.7632	59.3355	75.7983	94.7001	7.38364		#DIV/0!	#DIV/0!	#DIV/0!	#DIV/0!	#DIV/0!	#DIV/0!		#DIV/0!	#DIV/0!	#DIV/0!	#DIV/0!	#DIV/0!	#DIV/0!
SEM	3.83291	4.71845	6.32518	8.22148	10.0382	0.782665		#DIV/0!	#DIV/0!	#DIV/0!	#DIV/0!	#DIV/0!	#DIV/0!		#DIV/0!	#DIV/0!	#DIV/0!	#DIV/0!	#DIV/0!	#DIV/0!

## Sheet: 11.02.20
	PLA							IF XAB2							IF AQR
Rawintden	NoUV	1h	2h	4h	16h	control		NoUV	1h	2h	4h	16h	control		NoUV	1h	2h	4h	16h	control
	16314481	3534908	16366124	11264780	10773976			26253067	30580852	22434366	20949544	25873500			11327493	23248376	20473761	20608420	26625413
	18495254	4830267	16534174	12020844	12182574			27160052	32302374	24420870	22202933	30662533			16445216	28684472	23511086	22303264	29632387
	19054821	4911908	17069912	14844173	13768101			27280394	32524223	25319540	23308201	32231174			17986425	28752385	26590902	22344917	33384255
	19463908	5647332	18039036	15889269	18999848			27537415	33087537	30080913	23814053	33158054			19835603	30350403	27782646	23008536	34339573
	21731970	5992146	18844992	15915171	19253841			27871173	34456978	30609198	25109663	33426219			25171184	30767922	29510447	26834625	35831202
	21791140	6103514	18949935	15985565	19638734			28285039	35718351	30995541	25259349	35214659			25928529	31035803	30859596	29542272	36205950
	22050665	6273880	19314925	16340435	20811624			31613506	36645380	31335924	25441120	35769564			26651479	31975681	31467600	30044008	37540292
	23150236	6343715	20411958	16780545	21360873			31816529	37201796	31542285	26993323	35923936			27152459	32377879	31936170	30341446	38394960
	24283788	6347450	20467707	17017854	22776108			32170168	37696256	32513771	27902060	35956747			27871173	32399161	32623866	30627641	39360939
	24553533	6637233	20470602	17311466	22989791			34105572	38186420	33334100	28063847	35996349			28285039	33668001	33143040	30933820	39731653
	25135422	7137372	20730460	17573812	23027860			34299815	38916881	33371720	28804779	39792750			28765960	33674865	34204245	31130837	40590601
	25477644	7203566	20914460	18055184	23703431			34801529	41216704	33555593	29064389	39951613			29259003	33799339	34596443	31151870	40752072
	25481788	7316737	21635432	18094606	25716775			35562304	41377420	33705370	29639531	39974198			29259003	33849086	34691695	31348079	43852198
	25642894	7341908	23317323	18181471	26184717			36969925	41377420	33974445	29682852	40189700			29271485	34430730	34901526	31694364	45392778
	27031583	7437878	23349987	18220970	26349900			37799337	41806564	33976306	29946142	40324672			31570726	34587470	35048596	31883753	46175401
	27236075	7751282	23415174	18627506	28653150			38331474	41890595	34214314	30017325	40725798			31816529	34899577	35889911	31945877	46867287
	27434507	7947202	23419909	18717517	28718429			38515558	41972650	34243085	30868292	42668728			32170168	35148875	36658366	32249746	47313743
	28360886	8296110	24378605	18735082	28812156			39603952	42014601	34817898	30955047	42705119			32400873	35289281	37146654	32314226	47706444
	28695278	8345390	24589937	19066605	28933558			40183504	42427847	35120231	31017349	43547354			32589663	35551228	37229705	32677045	49479222
	28932122	8369246	24967712	19219139	30055710			40251360	43041948	35217479	31351268	45301271			33768634	35625476	37742193	32898858	50291053
	29306786	8443842	25127688	19224164	30668044			40544186	44331206	35438952	31874922	45499354			34370642	35656363	38020777	33272650	50294720
	29581090	8533532	25203637	19376316	31042104			40603390	44540929	35478278	32336628	47173662			35492717	36176244	38288034	33508760	50631427
	29868232	8772230	25794764	19409385	31552113			41106991	44559726	35970627	32387819	48051512			35574426	36468403	38485112	33854874	51336555
	30130395	8948103	26714351	19532786	32794634			41311131	44877197	36736344	32809908	49011443			35703458	36890742	38730655	34181944	51347641
	30231415	9014148	26716517	19888739	32989062			41782652	44890839	36771111	33227857	49063357			36576136	38165622	39210669	34817266	52075941
	30334427	9290987	26790598	20203115	33779696			41790675	45271841	37166223	33233765	49651919			36627139	38232844	39963866	35064949	53011337
	30710053	9311080	27128326	20547567	34943416			43060030	45629015	37212680	33246738	49829835			36909508	38440800	41328046	35309609	53493599
	30752477	9311473	27239895	20862911	35443111			43280014	46039726	37593990	33376950	51157869			38515558	38461513	41336866	35344256	53906316
	31074070	9471410	27341441	21366079	35948632			43328952	46692365	37826580	33465678	52609727			38915019	38898407	41571514	35669171	54187408
	31139880	9818380	27370879	21483300	36848285			43690156	46693264	38069067	33474445	52898585			38915019	38993829	42695274	35742011	54193958
	31401493	9829662	27494537	21868894	37026568			44243321	46959505	38531803	33652618	53532411			39033187	39214794	43115959	36364324	56406888
	31611962	9875883	27712543	22376486	37126832			44349565	46959505	38539170	33700367	53756359			39033187	39610498	43586598	36608258	56537873
	31855902	10112405	27804483	22448183	37562108			44940922	47476856	38758278	34774606	54167497			39062706	39958117	43986452	36612070	56899869
	32333991	10196675	27945619	22752084	37940796			45367090	47476856	39053195	34883148	56276943			39062706	40561955	44069257	36614673	57299882
	32472564	10252091	28169368	22874055	38161127			45692689	47581846	39213536	35165829	56911319			40183504	40617533	44489926	37435665	60873198
	32578971	10288728	28219884	22880552	38285569			45948180	48475278	39604790	35261665	57714571			40251360	40710482	44694734	37557915	61100847
	32628213	10307877	28280032	23169145	39721364			46195111	49066055	40010350	35318093	59798449			40603390	40955540	44989114	38362295	63359413
	33105076	10380858	28384987	23234219	40056946			46426752	49391222	40377602	35588220	60495178			41307230	41316634	45071687	38396124	63763327
	33205992	10603156	28442676	23424307	42126186			46516382	50454918	40381053	35889657	63019127			41311131	41377420	45184033	38856312	65079897
	33483484	10646753	28933941	23480495	42804538			47388255	50716784	40883301	36391300	63158663			41992285	41802076	45256592	39988533	65677256
	33571105	11010593	29238154	23666978	42954213			47517863	50716784	41151356	36758285	63167685			43060030	42200714	45360556	40361430	66192159
	33713387	11086145	29238610	23987591	43157609			48690633	50921260	41304870	37331793	64235407			43328952	42474071	45800699	41324065	66922893
	33907363	11210229	29290346	24007155	43435665			49553641	52386975	42104861	37494454	64922678			43925514	42635527	47051739	41410911	70163345
	33923890	11598082	29375900	24254040	44770931			50024874	52386975	42108382	37556358	66263150			43925514	42955497	47277404	41587634	70726539
	34115690	11624474	29377147	24393253	44994187			50188019	52532769	45518155	37588250	66297841			44222213	43684443	47672390	41594984	72010601
	34918004	11642454	29661806	24762049	45185775			50745428	52655918	46164286	39133505	71027241			45948180	43705327	48536699	41797240	72505630
	35040035	11912337	29738906	25712450	45271286			51112210	52655918	47034670	39405283	71672601			47388255	43878510	49755840	41959464	72672192
	37041280	12201981	29783759	25937652	45377265			51174446	52719506	47366561	39409632	72362962			47517863	44068029	50094291	42516051	73326213
	37587114	12253813	30016021	26213039	46538119			51920939	53137920	48029896	40005365	72625345			47764360	46476038	51273237	42890821	74517983
	37681160	12317821	30044526	26959657	46745852			52012243	53260172	49936777	40113029	78715924			47764360	46959505	51903633	43410253	76693133
	37839080	12405939	30133420	27589583	47650333			52135117	53602520	50055438	40554250	82026154			48479876	47216107	51914213	44212637	77318696
	37921165	12518039	30153098	27778753	47835244			52843807	54211685	50552046	40822762	82724298			48526696	47476856	54198465	45050000	78207358
	38098022	12631385	30334997	28097523	48181163			53227387	54305174	50631580	41455678	82751036			48526696	47854139	55963929	45288469	82728536
	38263131	12680765	30537472	28101655	48898452			53306716	54305174	51193171	41534233	87538989			49898406	48052311	56111227	45530673	84263578
	38337499	12803344	31418720	28262360	49273068			53484905	54404127	51423129	41704823	89201241			49898406	48588783	56226689	45660145	85186841
	38943057	12957642	31423537	28347628	51167080			53564234	60676078	52843833	42032648	90016775			50745428	49858928	56245763	45744006	85745271
	40489863	12989202	31688293	29301348	51447815			53802392	62475924	52863462	42627626	91300144			51507841	49890782	56437236	45974032	89431566
	40820798	13075425	31781572	29460041	52549696			53847998	63697310	52988205	42947237	95225666			51507841	50716784	57224480	46855700	89961591
	40989970	13260725	31942903	30134589	53219263			54142246	63697310	54098389	43363615	96337339			52012243	51012474	58273896	47127845	92074337
	41477991	13495673	32027690	31048212	53380727			54252001	65404499	54449057	43711584				52045938	51270066	59311068	48348801	99376300
	43179191	13571008	32341468	31251386	53787608			54308973	65990998	54717056	45137845				52045938	51380927	59435311	49183705
	44146948	13629964	32420972	32390584	58914658			54333876	70543663	55210973	46348786				52135117	51698671	61588792	49445061
	44491854	13638749	32526990	32926578	59684825			54411477	70543663	56093285	46573202				52251978	52386975	61594652	49883966
	46104134	13680283	33164117	33960955	60776718			54665800	74283968	56764203	47203118				53306716	52655918	61671597	50198581
	46139399	13711472	33197058	36053044	60823524			55107138	74283968	57580940	47405378				53484905	53494975	62725189	51496412
	46186147	13774919	33446689	37438591	61767223			55137424	82513869	58800086	47441829				54142246	54305174	64936983	52186045
	46586612	13944613	33634438	37727789	66392007			55949315	83656926	62967450	47816322				54411477	54568348	65571596	52517407
	47074500	14008510	34395425	40274978	68207912			56567347	83656926	63614929	49862960				55156355	54705951	66301456	53280995
	49173659	14031501	34445467	40832767	73925889			58036652	102175310	65069425	50452902				55730227	54857440	68229261	55164038
	49480382	14252411	34857782	42767025	80173904			58972266	102175310	66783424	50765874				55730227	54974356	69485179	55499705
	50106726	14364192	34925436	43197948				60375112		67411855	51314823				56072909	59285332	71379137	56467737
	50213296	14629613	35359322	46069056				61236895		67571997	51640071				56072909	61616053	71451878	56493918
	51539243	14939652	35437592	48670174				61673769		71063764	52390450				61089987	63697310	71708873	56505619
	52226474	15794918	35825231	49301118				61728735		71082962	52502191				61728735	65143227	74697973	56765712
	52944281	16076187	36413899	49520196				63816813		73013229	52572712				64530746	67357327	81097915	56951080
	53710562	16233561	36741915	49834520				64530746		85319923	52695444				65953798	70543663	83315177	57293004
	54384479	16400215	36793546	49929996				64720061		85526577	52733827				65953798	74283968	84492264	57666779
	55742131	16541630	36846427	50105278				65203044		87873808	53005895				66566617	83656926	110822082	57818264
	55828412	17093798	38485012	50559776				65216950		106418566	55070512				66566617	102175310	127985449	60373516
	60662215	17203453	38541901	50933772				66566934		118810732	55368721				66566934		133410362	61535528
	61079542	17770890	39323535	51408162				68237401			55499376				68536224			62127239
	70111050	17895616	39653384	51636966				70980191			56980729				68536224			62604510
	70701598	18497896	39744869	51769874				72226215			58113332				70980191			65296445
		18866792	39814496	52145184				77882582			59541922				73347552			65296636
		19791331	41221646	52171922				78938105			62509962				73347552			66234844
		19833174	41478157	52341252				79957971			62577924				73688850			67378937
		20215954	42464227	53368923				80489420			62727209				79003608			67607751
		20227126	42709185	54338890				85234079			63416593				79003608			68073034
		20537064	43233540	54394994				87488768			63902496				79792511			71434303
		20707424	43354607	55516241				87539400			67339007				79792511			72094544
		21342191	43529663	55523459				96686485			69404383				80675543			74769667
		21721405	44871545	58174914							88515479				80675543			93469630
		21790413	45758467	58292544											81739425
		22173597	46577671	59086419											81739425
		22837662	51102998	60057100											82582128
		22861435	54523211	60133341											82582128
		23014025		60987735											86139839
		23153726		61732134											86139839
		23525127		62492701											93991867
		24141575		64948148											93991867
		24268004		67903210
		24621569		76146772
		25266961		76940134
		25690725		77602989
		26281616
		26703945
		27804082
		28345400
		28529262
		29058293
		30223817
		30665771
		31498364
		40941529
		41045802
Moyenne	3.68026e+07	1.46039e+07	3.09414e+07	3.4511e+07	3.96574e+07	#DIV/0!		5.12499e+07	5.17501e+07	4.75239e+07	4.14656e+07	5.61285e+07	#DIV/0!		5.03075e+07	4.4891e+07	5.11077e+07	4.47957e+07	5.86828e+07	#DIV/0!
SD	1.15881e+07	6.74613e+06	7.78027e+06	1.70061e+07	1.47593e+07	#DIV/0!		1.48623e+07	1.48435e+07	1.76815e+07	1.24712e+07	1.84114e+07	#DIV/0!		1.88477e+07	1.29271e+07	2.02904e+07	1.37677e+07	1.74116e+07	#DIV/0!
SEM	1.27196e+06	634623	794070	1.66758e+06	1.76408e+06	#DIV/0!		1.55799e+06	1.77414e+06	1.97685e+06	1.30021e+06	2.39696e+06	#DIV/0!		1.88477e+06	1.45441e+06	2.26854e+06	1.43538e+06	2.24783e+06	#DIV/0!
Par rapport à NoUV
Moyenne	100	39.6816	84.0739	93.7731	107.757	#DIV/0!		100	100.976	92.7297	80.9085	109.519	#DIV/0!		100	89.2333	101.591	89.0439	116.648	#DIV/0!
SD	31.4873	18.3306	21.1405	46.2088	40.104	#DIV/0!		28.9996	28.963	34.5005	24.334	35.9248	#DIV/0!		37.465	25.6961	40.3328	27.3671	34.6105	#DIV/0!
SEM	3.45618	1.7244	2.15765	4.53115	4.79334	#DIV/0!		3.03999	3.46174	3.85727	2.53699	4.67701	#DIV/0!		3.7465	2.89104	4.50934	2.85321	4.46819	#DIV/0!

## Sheet: 28.02.20
	PLA							IF XAB2							IF AQR
Rawintden	NoUV	1h	2h	4h	16h	control		NoUV	1h	2h	4h	16h	control		NoUV	1h	2h	4h	16h	control
	6447456	4326149	7477966	5779086		978405				12529069	14868771	14405067					13648398	13979836	15973649
	7489928	4897182	8897278	6657218		1401263		12107586		14918385	16614316	14969810			10107141		15918034	14376828	16324776
	7494163	5429606	10555191	6770820		1517253		13175301		14995866	16947409	15837338			10369741		16061335	14781270	16783211
	7710591	6649881	11330987	7173582		1800366		13716140		15409852	18026983	15933149			12991884		16535188	14852175	19746464
	7766608	6945219	11500835	7536369		1916441		14017203		15667041	18122050	16016916			13586117		17792708	15580701	20007633
	7889867	7004650	12113942	7673314		2457056		14641433		15950525	18722268	16569631			14438570		19166091	15802366	21058671
	8002295	7538244	12667628	7722986		2495879		14890502		16474352	18800774	16617043			14643829		19566110	15842515	21711655
	8040423	8059777	12847391	8625010		3041488		15275492		17178588	19173714	18609853			15807842		19684999	16067096	21887410
	8483767	8081710	13274707	8633579		3090135		15959979		17497130	19525105	18666606			15872097		19720463	16434856	21929895
	8654437	8168008	13598472	8672093		3218016		16317244		17502845	19584832	19225429			15992358		19991395	17127150	23127879
	9029019	8988970	13642155	9032630		3245108		16443058		17600733	20329021	19646671			16357416		20321287	17355704	23899514
	9081304	9154447	14468673	9193590		3252586		17181427		18985080	20379350	19704410			16670230		21025383	17675639	24207881
	9598492	9255213	14557884	9429466		3413003		18228745		19222673	20426050	20518881			20650528		21501151	17812792	26555479
	9691520	9623228	15213359	9542255		3484109		18361351		19225509	21018681	21884896			20708866		22520974	17935897	27041825
	9973622	9743752	15741012	9795235		3517577		18617650		19770610	21037635	22075187			20886152		22662525	17961721	27414445
	10511330	9812309	15892268	10023933		3647860		19873791		19859382	21228024	22867400			20979397		23049022	18004137	27868293
	10623491	10161257	16468069	10383133		3711851		20115298		19969206	21539114	23152557			21547003		23384016	18178376	27988479
	10721424	10243121	16791348	10623139		3729763		20969981		20123523	21646766	23351121			21874718		23584340	18477693	28959635
	10871194	10415354	16827876	11002701		3808863		21569664		20931097	21960072	23867323			23658135		23589476	18998607	29082991
	11824491	10689108	16861822	11080641		3849159		24680878		21274665	22056778	25307441			24849857		24483510	19431983	33202101
	12412815	11205836	16956206	11106036		3891237		27607769		22005830	22124109	25333115			30818510		24961889	19668246	34747286
	12467087	11824970	17176266	11272868		3963204		28502288		22133100	23415867	28163967			32935422		26147466	19765798	34956847
	12658426	12071555	17347886	11710879		4003652		29164432		23250895	23484987	28309756			33994513		26189432	19878127	35873353
	12988122	12273684	17468656	11710967		4137158		31033725		24775763	24047847	29716385			34382458		27246561	19950063	37375673
	13362441	12299882	17687412	11906597		4243481				25865459	24700564	29826565			37368687		28243815	20379213	41203042
	13634732	12748936	17733740	11908401		4319387				28570492	24922183	32689247					32985471	22629031	43297289
	13753563	12835494	17810351	12089421		4433764				29836309	27964389	33904918					33076001	23044114	44894763
	14051601	13080586	18098814	12107932		4584545				30179115	27999327	35370693					35300060	23884461	47756002
	14530936	13126657	18492518	12193380		4586546				32183070	28177680	35536926					39419195	24200340	49016269
	14563498	13678978	18736776	12341174		4600406				33798109	28668102	35900649					43299757	25533657	50630238
	14639841	13790758	19238280	12413378		4625260				35609351	28847641	36589486					44250221	26193219	50929643
	15019326	13895284	19455983	12485701		4688356				37422647	28939421	38351506					45364817	26194085	56264196
	15449194	14076671	19849120	12665254		4790807				37835311	29564078						46463653	26560904
	15911341	15546742	19926534	12750602		4842889				38346992	30402049						51605162	27476496
	15928536	16329456	20136430	12996525		4951834					31213469							29117207
	16022618	16486468	20383383	13040579		5135524					32852246							29994272
	16244377	17133366	20714649	13054472		5141153					33809287							30568112
	16649747	17338310	21187185	13129944		5182044					40362132							37320501
	16944413	17533152	21585289	13244027		5281240
	17053097	17930948	21712507	13399857		5481474
	17632836	19936836	22364597	13803479		5553737
	17742828	21222104	23028712	14548072		5688427
	18186015	24102068	23088728	14891719		5702715
	18444191	26537764	23384619	14899431		5746147
	19009284		23786356	14909398		5867720
	19089926		24272779	15088972		5870417
	19370683		24355964	15236335		5908717
	19465445		24798720	15336719		5976662
	19803395		25068598	15514037		6036497
	20042024		25670525	15553917		6051921
	22980253		27893357	15649683		6082948
			28265059	15722770		6088645
			28603770	15816869		6159548
			28760656	16513254		6183219
			29481316	16562210		6201626
			32389154	16583720		6283311
			35554737	16777078		6414101
				16836220		6417805
				16935272		7078994
				16974391		7231246
				17065929		7376353
				17088084		7402022
				17584545		7608210
				17930724		9267078
				18413408		9579408
				19620982		9581545
				20061793		9798027
				20289888
				24411832
				26166836
Moyenne	1.34502e+07	1.23226e+07	1.93543e+07	1.33667e+07	#DIV/0!	4.97936e+06		1.9237e+07	#DIV/0!	2.285e+07	2.37764e+07	2.43412e+07	#DIV/0!		2.08955e+07	#DIV/0!	2.67282e+07	2.07641e+07	3.13036e+07	#DIV/0!
SD	4.25075e+06	4.91757e+06	5.89228e+06	4.04565e+06	#DIV/0!	1.91551e+06		5.50766e+06	#DIV/0!	7.4287e+06	5.57149e+06	7.32557e+06	#DIV/0!		7.88638e+06	#DIV/0!	9.97007e+06	5.39528e+06	1.14233e+07	#DIV/0!
SEM	595225	741351	780452	483547	#DIV/0!	234017		1.14843e+06	#DIV/0!	1.27401e+06	903814	1.29499e+06	#DIV/0!		1.6098e+06	#DIV/0!	1.70985e+06	875230	2.01937e+06	#DIV/0!
Par rapport à NoUV
Moyenne	100	91.6167	143.896	99.3792	#DIV/0!	37.0208		100	#DIV/0!	118.781	123.597	126.534	#DIV/0!		100	#DIV/0!	127.914	99.3712	149.811	#DIV/0!
SD	31.6037	36.5614	43.8083	30.0788	#DIV/0!	14.2416		28.6306	#DIV/0!	38.6168	28.9623	38.0806	#DIV/0!		37.742	#DIV/0!	47.714	25.8203	54.6686	#DIV/0!
SEM	4.42541	5.51184	5.80255	3.59511	#DIV/0!	1.73988		5.96989	#DIV/0!	6.62272	4.69831	6.73177	#DIV/0!		7.70406	#DIV/0!	8.18288	4.18861	9.66413	#DIV/0!

## Sheet: 18.05.21
	PLA							IF XAB2							IF AQR
Rawintden	NoUV	1h	2h	4h	16h	control		NoUV	1h	2h	4h	16h	control		NoUV	1h	2h	4h	16h	control
	6786886	5694184	13868587	15034575	7939083	835294			22206032	11711593	17568382	15572716				18232223	8144014	16561727	11133841
	8893760	6862195	13958555	15180858	9223671	1588477		17732516	24112030	13283352	17611840	15706572			12934711	18555199	9836835	18103723	15720853
	9201128	7603477	14290855	15583218	10068034	2354763		21934355	24607415	16768588	18147884	15710104			15540096	18889535	12663541	18736121	16770927
	10709418	8312684	17586661	15665691	10080343	2533384		22379856	24852145	18068608	18594415	15770482			15738251	19418625	12731960	18819390	17438448
	10827817	8502717	20066191	17134314	10719935	2755320		22488582	25151851	19242996	18871883	15806321			16071691	21754990	13173874	19692028	17774015
	11135119	9842738	20663201	18393368	11321213	2826026		22994859	26015655	20737307	18948745	16316262			16271565	21782754	13894991	19735505	18153807
	11397512	9875870	20841629	18554994	11406560	2903504		23170396	26236370	20776616	19768349	18227441			16342877	22332025	14355778	20213311	18661597
	11542001	9962472	20883164	18572807	11611071	3029227		23199387	26325236	20850046	19821307	18947182			16661220	22664938	14589521	20736572	18732957
	12939827	10058247	20973065	18636192	11983437	3210413		23287290	26393638	21106528	20007955	20144884			16979197	22792477	14839301	20996543	19040784
	12980977	10371031	21327070	18834416	12224870	3492357		23669184	27656687	21253734	20230166	20220935			16983421	23425247	15207391	21244239	19283604
	13267875	11032409	22664440	20246642	12391221	3501568		23867568	28800709	21290625	20338229	20318351			17004700	23937111	15292790	21253656	19498069
	13916188	11806431	22832832	20321276	12728862	3522878		24104520	28987034	21473921	20666290	20818147			17128004	24047828	15317040	21541923	19628342
	14022014	11817564	23616698	20385328	12899256	3660194		24689274	29024581	21820550	20970726	20975312			17139566	24315832	15437961	21552922	20119842
	14876001	12023495	24036047	20499847	13113902	3662148		25032630	30342967	21985858	21095852	21309998			17481132	25544371	15789256	21923722	20332314
	14879793	12160312	24435096	20553100	13489190	3667381		25047028	30617728	22107423	21619855	21606617			17550765	25710721	15971741	22806683	20535443
	15509511	12438981	25384359	20620679	14255208	3748236		25429045	30911582	22146476	21782186	22135060			17630331	26127664	16137581	23649281	20626711
	15608266	12689715	25771228	20654484	14261790	4037506		25648353	31201429	22601949	21798814	22479802			17771479	26740541	16291062	24053910	20884898
	15730438	12721974	25871464	20773416	14350270	4052984		26187441	31267959	23226516	21856756	23395425			17830618	26993306	16318126	24452183	21254611
	15897029	12745674	26086062	20840092	14885483	4173325		26335314	31348761	23803462	22047916	23578755			17911614	27357357	16521533	24620418	21431833
	16008079	12863977	26669190	21130313	15287893	4314287		26535894	31781249	24259929	22540448	23589399			18038166	27520239	16809041	24920006	21861934
	16378901	12881795	27684558	21228180	15516764	4367599		26582222	32177074	24359540	22919565	24039814			18114016	27595848	16889207	24950991	22202364
	17437861	13019439	27897076	21341568	15672842	4630885		26750592	32377946	24824774	23212579	24457781			18386937	28590330	17617833	25136544	22241273
	17610428	13044783	29010806	21786356	15951286	4727312		27290510	32621224	25124701	23369453	24864760			18688647	28627500	17720261	25750735	22552367
	17706032	13190644	29163348	22200663	16057749	4745449		27332781	33253127	25230670	24072877	25778269			18965643	28915493	17897175	25838171	22861886
	18109339	13229065	29765094	22243031	16646885	4760455		27372510	33268909	25415668	24566565	26058246			19109979	29139487	18309867	26253757	22940672
	18152694	13246151	29871370	22341345	17216784	4786301		27742394	33957472	25571901	24643887	26111227			19181578	29183630	18436209	26700976	23157973
	19652030	13354065	30347386	22423202	17230426	4822503		27755713	34288158	25605363	24674802	26287110			19190327	30295316	18519070	26707998	23543259
	19931047	13442066	30721614	22654624	17584332	4845719		27807551	34770965	25648383	24753129	26308376			19365214	30507029	19215625	26795892	23625864
	20837555	13586319	30977626	22882957	18015207	4859011		27835699	35592718	25900518	25949644	26329896			19618210	30953757	19429171	27081116	24267667
	21221309	13884195	30986802	22887751	18183708	4960106		27956592	36062627	26690818	25967827	26349119			20233754	31088326	19516866	27449291	24631853
	21290586	14061671	31106368	22947476	18297580	4994584		28035494	36341298	27063534	26265330	26815902			20483426	31291646	19845975	27572224	24987898
	21420245	14373619	31321337	23181821	18647548	5133998		28730352	38299369	28146971	26502208	26942247			20509864	31435316	19974092	28154692	26291640
	21857636	14489392	31714424	23181922	18896069	5134939		29041268	38496036	28518623	26871001	27057074			21237565	31642940	20379265	28159434	26301382
	22135377	14495393	32065354	23270016	19202215	5158174		29555107	38919823	28553528	27309118	27237470			21508731	31817243	20394171	28209852	26571545
	22135814	14898150	33066244	23303363	19264729	5258405		29866064	38977669	28938355	27311271	27484784			21667303	32243704	20441995	28505563	26664722
	22702157	14908407	33490715	23534557	19349524	5294944		30318356	39568254	28978921	27649064	27564874			21673218	32804291	20463218	28513274	26676288
	22832826	14916966	33914928	24251284	20170848	5304958		30613296	39782606	29108548	27775636	27746594			21699858	33102371	20821302	28518236	27100820
	22934189	14983544	33991522	24415601	20237328	5324984		30651721	40192723	29348491	27844924	28082562			22251805	35023223	20911168	28991370	27606303
	23031557	14994580	34249864	24684869	20756402	5434122		31072107	40421694	29571865	27911101	28179194			22412876	35758963	21035828	29105339	28237927
	23122101	15052736	34315067	24707592	20906665	5598710		32268374	41386419	29783646	28642402	28506896			22835588	37554421	21468566	29296044	28366438
	23230975	15057473	34491203	24913751	20963944	5789999		32667641	41418436	30259776	29372584	28839200			22975460	37708656	21717502	29542034	28605660
	23716908	15133338	34700568	24936851	21276742	5973429		32736980	41755720	30670423	29847313	29093261			23103860	37738876	22024890	29951466	29153574
	23855663	15579907	35090375	24978586	21386481	6561185		32807936	43087460	30823329	30118930	29113477			23114915	38673184	22024983	30481767	29234286
	24694913	15597136	35259796	25460281	21441045	6767798		33821655	43641211	30881348	30663096	29995024			23127234	39019030	23024375	30832089	29340810
	24810821	15623914	35738448	25632560	21513315	6817117		33994174	43948248	31482347	30817335	30561288			23400736	40001046	23067207	30880395	29526911
	24960367	15755954	35892595	25975398	21569471	7025533		34100216	44594765	32101324	30845177	31779026			23503100	40492139	23193113	32060142	29580791
	25669885	15758032	36226214	26108682	22083808	7520887		35358816	44921981	32445940	31000779	32358269			23523823	40937642	23760486	32461541	29995870
	26421436	15877861	36745446	26768184	22156541	9095913		35705983	45832337	33174318	31030416	33603625			26008873	41401994	23775422	32815976	30326263
	26828660	16012405	36755367	26817549	22457314	9137514		36683150	46039953	33376283	31364144	34111663			26705186	41813145	24776365	32957489	30997557
	27063192	16012405	37210511	26916836	22738878			36704374	46351950	34075668	32269326	34131271			26856612	43932480	25415176	33329688	31678028
	27936919	16100491	37369154	27042822	22970975			37222827	46353738	34475232	32355590	34443270			26925382	44500747	25654185	34669339	31732170
	28875808	16135074	37997774	27119723	23189271			37734336	46633223	34618577	32456431	34473318			26953149	44941527	25668786	34759746	31989972
	28975811	16189279	38004117	27490430	23451316			39562357	46941625	35355682	32873738	34482972			27126252	45444865	25974486	34774403	32081351
	29127365	16448092	38686155	28026073	23478411			40571248	48805897	36052030	33072459	34612213			29104723	45829353	26475423	35110740	32090511
	29138486	16464738	39165634	28117743	23825256			41476376	49869102	36315213	33276007	34630486			29281771	46400588	27081176	36342973	33245585
	29270855	16547317	39263308	28526688	25539058			42542876	50093339	37214759	33883739	34801933			31267291	46482886	27744974	36435829	33370891
	29292430	16777514	39586736	29383362	25757861			43547112	50531384	37885758	34731200	36196889			31948531	47864973	28171436	36488339	33430708
	30343767	16947689	40115792	29440933	26048876			46599869	51480404	38492017	34987659	37283021			33156439	51335648	29130163	36575169	35744463
	30696129	17067608	40128572	29586776	26560353			49034642	51975484	39288807	35150576	37741732			34656447	52136029	29267273	37323041	36036904
	30768343	17072672	40132839	30414352	26657927			49078541	53155656	39416057	35234953	37764473			36726947	53016468	29958679	38489915	36115607
	31587053	17171326	40180294	30429422	27114089			51338357	61469652	42228703	35300221	38511614			38693145	54488056	30760144	38907271	37679723
	31889018	17259626	40383344	30540676	27144455			52308497	63424810	42544913	35402782	38926320			39011448	54746733	30925519	39403785	37695731
	32622251	17303597	40513776	30556590	28356169			54085735	64223325	47942847	36214560	40089434			39872277	56932934	33642346	40016828	38133089
	32662193	17404514	41064596	31494874	28464100			56531016	65349088		36372954	41172100			43339559	79299950		41004201	38277136
	33367161	17470984	41147175	31673001	29529405			59853311	100459059		36911180	42036460			43384127	81457765		42211052	39038702
	34693962	17697388	41295371	31813058	30162167			62983799			38289380	42040071			44954621			42608779	40470808
	35170842	17795670	42308233	32627094	31176999			71922655			38517707	42460162						42973742	40603314
	37805295	17895009	44223243	32687697	31456139						39044056	44167285						43227096	40958580
	40182867	18233094	44342911	32908727	32242157						39325173	44416317						44676082	42488818
		18379805	45032352	33441447	32333744						40692182	46885806						45642593	43430127
		18414872	45275513	33861265	33456967						40752409	49476588						46076103	45207007
		18451478	45865092	35118424	35115012						40903423	51369345						47156753	46930340
		18848302	46264331	35910434	35421432						40916376	51401039						48346982	47023828
		19336299	46290746	36013437	35976796						47009482	55411647						50666069	54722881
		19875450	46331906	36477918	40926969						54672464	58460161						54856755	56166027
		19883801	47704671	37193605	42776643							60011932							56334720
		21526022	47775466	37278320	45311726
		22880336	48560546	38232034	46189245
		23770659	50432154	38317036	46425327
		24310227	51025731	38409334	49727500
		24336391	51796412	42107646	54491245
		24644314	52890888	42574507
		24664904	53756211	44846359
		24938063	55659726
		25984743	55699419
		26814761	56599672
		27480594	58990324
		28604962	59379059
			59747316
			60510204
			64706816
Moyenne	2.20622e+07	1.59429e+07	3.66132e+07	2.64488e+07	2.26779e+07	4.66738e+06		3.3474e+07	3.9707e+07	2.81273e+07	2.8909e+07	3.08116e+07	#DIV/0!		2.34595e+07	3.54202e+07	2.03467e+07	3.08982e+07	2.91994e+07	#DIV/0!
SD	7.762e+06	4.67572e+06	1.15182e+07	6.77456e+06	1.00356e+07	1.65265e+06		1.11323e+07	1.28504e+07	7.22113e+06	7.61589e+06	1.03813e+07	#DIV/0!		7.66757e+06	1.28902e+07	5.49009e+06	8.69408e+06	9.70123e+06	#DIV/0!
SEM	934435	498433	1.20744e+06	743605	1.11507e+06	236093		1.3703e+06	1.5939e+06	909777	879407	1.19082e+06	#DIV/0!		951045	1.59883e+06	691687	1.00391e+06	1.11281e+06	#DIV/0!
Par rapport à NoUV
Moyenne	100	72.2636	165.955	119.883	102.791	21.1556		100	118.62	84.0273	86.3625	92.0464	#DIV/0!		100	150.984	86.7314	131.709	124.467	#DIV/0!
SD	35.1824	21.1934	52.208	30.7067	45.4879	7.49088		33.2566	38.3893	21.5723	22.7516	31.0131	#DIV/0!		32.6843	54.9466	23.4025	37.06	41.3531	#DIV/0!
SEM	4.23546	2.25922	5.47288	3.3705	5.05421	1.07013		4.09361	4.7616	2.71786	2.62713	3.55745	#DIV/0!		4.05399	6.81529	2.94843	4.27932	4.74353	#DIV/0!

## Sheet: Moyenne des 3
	PLA							IF XAB2							IF XPB
	No UV	1h	2h	4h	16h	XAB2-GFP		NoUV	1h	2h	4h	16h	control		NoUV	1h	2h	4h	16h	control
	8249960	15009728	23324415	25020759	1166690	858249
	8704117	16069382	28518139	25180843	8249960	1018828
	9060859	18362473	29167524	26851961	8704117	1140944
	9993403	20587317	30001601	27272190	9996064	1238901
	11732463	21791937	31095574	30050547	10000615	1260995
	11745908	22986390	31637726	31073228	10607837	1273554
	11773500	23067591	32719030	32255355	11735626	1280350
	11782593	23162103	33288960	33450825	11773500	1321274
	12423455	23440913	33545755	33549105	12423455	1357811
	12518534	23529833	34545374	34349496	12616788	1496270
	12616788	23617934	35003240	34386640	13067989	1535799
	12738688	23620571	35193035	34438369	13313032	1670324
	13067989	23718445	35450857	35137018	13427895	1758243
	13076002	23890236	35563627	35331760	13480784	1775979
	13313032	24300515	35606215	35822873	13482116	1784568
	13480784	24959230	36111163	36677638	14034700	1877154
	13565166	25081970	36264261	36699040	14408997	2037848
	14005111	25429680	37479372	36933573	14785209	2040882
	14034700	25610888	37860829	37328587	15586455	2137821
	14408997	25636813	38310044	38186013	15847913	2140446
	14785209	26083305	38835734	38369482	16467532	2183593
	15640390	26362292	39388404	38542692	16551395	2193775
	16467532	26848322	40349492	38577360	16614766	2256646
	16551395	26870788	40524685	38956517	16751382	2333695
	18377443	27353230	41074546	40927877	17180528	2385341
	18689880	27421584	41602488	42113610	17580114	2548301
	18719721	27703220	42834213	42836805	17581065	2558360
	18817159	27911908	43073820	43756847	18139789	2671032
	19238077	28764870	43159717	43931457	18377443	2685647
	19676954	29141443	43790464	43948935	18689880	2702403
	20467184	29155512	44012677	43977607	18817159	2727501
	20530019	29192836	44877056	44705832	19676954	2771197
	20911240	29323014	45333490	45502787	19810326	2810459
	20963000	29454929	46369218	45557691	20963000	2955594
	21010145	29524712	46553521	46797520	21045687	3027507
	21500359	29585198	46628738	47181395	21615362	3034313
	21630365	29595105	46998191	47628683	22074716	3034893
	22074716	29793558	47143895	47678056	23420956	3070217
	22385712	30065967	47483014	47805696	24459681	3088743
	22387657	30079827	48305178	48036820	24492391	3143323
	22657905	30891882	48321636	48098014	24720449	3205713
	22673207	31230311	48395874	49124732	25191993	3225182
	23277409	31280533	48880630	49743798	25583957	3236187
	23677589	31362215	49074476	49787360	25653395	3247139
	23779071	31381196	49977754	49876699	25947446	3346581
	24720449	31400759	50361387	50122193	26198877	3408901
	24935155	31723928	51002799	50319276	26939397	3411616
	25103454	32470039	51510854	51617810	27470388	3437065
	25111508	32608097	51546980	51624365	28020609	3493559
	25263907	32962303	51569548	51705416	28066539	3507851
	25546519	33345027	51732877	51746331	28956035	3618955
	25588964	33358794	52326136	52223402	29017910	3631939
	25639278	33492901	53407690	52337161	29357637	3667586
	25711696	33506653	53570072	52461119	29664932	3675570
	26170435	33571157	54305923	53858327	29780871	3726717
	26201800	34512426	54820244	54344143	29930186	3796241
	27110135	34692772	54848623	54532406	29943676	3848191
	27308933	34764073	55445984	55746622	30341797	3850426
	27649665	35032708	55809844	55890802	30351252	3859077
	27704895	35356154	56231289	56116563	30541711	3871804
	28457985	36215640	57133021	56922247	33238255	3933305
	28514302	36793152	57438975	59297316	34450422	4074281
	28587483	38120242	59640738	62503009	34762768	4199511
	29053007	38384388	60727881	62924984	34774497	4261009
	29386009	38492241	60820964	62972353	35819966	4343457
	29568750	38701961	60822283	63064472	36462078	4360359
	29694017	39024863	61009653	64065031	36613723	4493847
	30119207	39281560	61136172	64972923	38608339	4525767
	30154268	39366450	61332472	65268527	38657243	4528580
	30482262	39457147	61556936	66711408	44097167	4537672
	31389394	40091991	63343194	67609443	44468235	4678005
	31547673	40392648	63520023	68971928	44771386	4817467
	31738346	40742214	63806925	69450711	44894228	4882958
	32038463	40913869	66470877	69932907	46681951	4897101
	32459729	41337789	67457813	74873973	49688556	4910352
	33574143	42517456	67626554	75091540	55471088	5211286
	34014081	42976366	68400720	75501416	58176378	5357740
	34498595	43975879	68775250	80126561	63280544	5428753
	36479915	44046683	68879146	80572054	64671833	5476327
	36771776	45442612	69304262	83833334	64680897	6023364
	37714342	45810452	69770956	84594633	65182133	6224318
	39841627	48984963	70415321	87645874	65483435	6632739
	45221797	49164991	71930792	96835411	65499507	6760374
	49585977	50160215	74305175	97557169	68636490	6818313
	51411313	51022164	75502268	98700723	71675300	6832508
	52233276	51644139	77389544		72548554	7233364
		53054663	77472611		77707415	7257866
		58309039	78174750		100068488	7454686
		63488313			120240488	7792019
		71690136
	16314481	3534908	16366124	11264780	10773976			26253067	30580852	22434366	20949544	25873500			11327493	23248376	20473761	20608420	26625413
	18495254	4830267	16534174	12020844	12182574			27160052	32302374	24420870	22202933	30662533			16445216	28684472	23511086	22303264	29632387
	19054821	4911908	17069912	14844173	13768101			27280394	32524223	25319540	23308201	32231174			17986425	28752385	26590902	22344917	33384255
	19463908	5647332	18039036	15889269	18999848			27537415	33087537	30080913	23814053	33158054			19835603	30350403	27782646	23008536	34339573
	21731970	5992146	18844992	15915171	19253841			27871173	34456978	30609198	25109663	33426219			25171184	30767922	29510447	26834625	35831202
	21791140	6103514	18949935	15985565	19638734			28285039	35718351	30995541	25259349	35214659			25928529	31035803	30859596	29542272	36205950
	22050665	6273880	19314925	16340435	20811624			31613506	36645380	31335924	25441120	35769564			26651479	31975681	31467600	30044008	37540292
	23150236	6343715	20411958	16780545	21360873			31816529	37201796	31542285	26993323	35923936			27152459	32377879	31936170	30341446	38394960
	24283788	6347450	20467707	17017854	22776108			32170168	37696256	32513771	27902060	35956747			27871173	32399161	32623866	30627641	39360939
	24553533	6637233	20470602	17311466	22989791			34105572	38186420	33334100	28063847	35996349			28285039	33668001	33143040	30933820	39731653
	25135422	7137372	20730460	17573812	23027860			34299815	38916881	33371720	28804779	39792750			28765960	33674865	34204245	31130837	40590601
	25477644	7203566	20914460	18055184	23703431			34801529	41216704	33555593	29064389	39951613			29259003	33799339	34596443	31151870	40752072
	25481788	7316737	21635432	18094606	25716775			35562304	41377420	33705370	29639531	39974198			29259003	33849086	34691695	31348079	43852198
	25642894	7341908	23317323	18181471	26184717			36969925	41377420	33974445	29682852	40189700			29271485	34430730	34901526	31694364	45392778
	27031583	7437878	23349987	18220970	26349900			37799337	41806564	33976306	29946142	40324672			31570726	34587470	35048596	31883753	46175401
	27236075	7751282	23415174	18627506	28653150			38331474	41890595	34214314	30017325	40725798			31816529	34899577	35889911	31945877	46867287
	27434507	7947202	23419909	18717517	28718429			38515558	41972650	34243085	30868292	42668728			32170168	35148875	36658366	32249746	47313743
	28360886	8296110	24378605	18735082	28812156			39603952	42014601	34817898	30955047	42705119			32400873	35289281	37146654	32314226	47706444
	28695278	8345390	24589937	19066605	28933558			40183504	42427847	35120231	31017349	43547354			32589663	35551228	37229705	32677045	49479222
	28932122	8369246	24967712	19219139	30055710			40251360	43041948	35217479	31351268	45301271			33768634	35625476	37742193	32898858	50291053
	29306786	8443842	25127688	19224164	30668044			40544186	44331206	35438952	31874922	45499354			34370642	35656363	38020777	33272650	50294720
	29581090	8533532	25203637	19376316	31042104			40603390	44540929	35478278	32336628	47173662			35492717	36176244	38288034	33508760	50631427
	29868232	8772230	25794764	19409385	31552113			41106991	44559726	35970627	32387819	48051512			35574426	36468403	38485112	33854874	51336555
	30130395	8948103	26714351	19532786	32794634			41311131	44877197	36736344	32809908	49011443			35703458	36890742	38730655	34181944	51347641
	30231415	9014148	26716517	19888739	32989062			41782652	44890839	36771111	33227857	49063357			36576136	38165622	39210669	34817266	52075941
	30334427	9290987	26790598	20203115	33779696			41790675	45271841	37166223	33233765	49651919			36627139	38232844	39963866	35064949	53011337
	30710053	9311080	27128326	20547567	34943416			43060030	45629015	37212680	33246738	49829835			36909508	38440800	41328046	35309609	53493599
	30752477	9311473	27239895	20862911	35443111			43280014	46039726	37593990	33376950	51157869			38515558	38461513	41336866	35344256	53906316
	31074070	9471410	27341441	21366079	35948632			43328952	46692365	37826580	33465678	52609727			38915019	38898407	41571514	35669171	54187408
	31139880	9818380	27370879	21483300	36848285			43690156	46693264	38069067	33474445	52898585			38915019	38993829	42695274	35742011	54193958
	31401493	9829662	27494537	21868894	37026568			44243321	46959505	38531803	33652618	53532411			39033187	39214794	43115959	36364324	56406888
	31611962	9875883	27712543	22376486	37126832			44349565	46959505	38539170	33700367	53756359			39033187	39610498	43586598	36608258	56537873
	31855902	10112405	27804483	22448183	37562108			44940922	47476856	38758278	34774606	54167497			39062706	39958117	43986452	36612070	56899869
	32333991	10196675	27945619	22752084	37940796			45367090	47476856	39053195	34883148	56276943			39062706	40561955	44069257	36614673	57299882
	32472564	10252091	28169368	22874055	38161127			45692689	47581846	39213536	35165829	56911319			40183504	40617533	44489926	37435665	60873198
	32578971	10288728	28219884	22880552	38285569			45948180	48475278	39604790	35261665	57714571			40251360	40710482	44694734	37557915	61100847
	32628213	10307877	28280032	23169145	39721364			46195111	49066055	40010350	35318093	59798449			40603390	40955540	44989114	38362295	63359413
	33105076	10380858	28384987	23234219	40056946			46426752	49391222	40377602	35588220	60495178			41307230	41316634	45071687	38396124	63763327
	33205992	10603156	28442676	23424307	42126186			46516382	50454918	40381053	35889657	63019127			41311131	41377420	45184033	38856312	65079897
	33483484	10646753	28933941	23480495	42804538			47388255	50716784	40883301	36391300	63158663			41992285	41802076	45256592	39988533	65677256
	33571105	11010593	29238154	23666978	42954213			47517863	50716784	41151356	36758285	63167685			43060030	42200714	45360556	40361430	66192159
	33713387	11086145	29238610	23987591	43157609			48690633	50921260	41304870	37331793	64235407			43328952	42474071	45800699	41324065	66922893
	33907363	11210229	29290346	24007155	43435665			49553641	52386975	42104861	37494454	64922678			43925514	42635527	47051739	41410911	70163345
	33923890	11598082	29375900	24254040	44770931			50024874	52386975	42108382	37556358	66263150			43925514	42955497	47277404	41587634	70726539
	34115690	11624474	29377147	24393253	44994187			50188019	52532769	45518155	37588250	66297841			44222213	43684443	47672390	41594984	72010601
	34918004	11642454	29661806	24762049	45185775			50745428	52655918	46164286	39133505	71027241			45948180	43705327	48536699	41797240	72505630
	35040035	11912337	29738906	25712450	45271286			51112210	52655918	47034670	39405283	71672601			47388255	43878510	49755840	41959464	72672192
	37041280	12201981	29783759	25937652	45377265			51174446	52719506	47366561	39409632	72362962			47517863	44068029	50094291	42516051	73326213
	37587114	12253813	30016021	26213039	46538119			51920939	53137920	48029896	40005365	72625345			47764360	46476038	51273237	42890821	74517983
	37681160	12317821	30044526	26959657	46745852			52012243	53260172	49936777	40113029	78715924			47764360	46959505	51903633	43410253	76693133
	37839080	12405939	30133420	27589583	47650333			52135117	53602520	50055438	40554250	82026154			48479876	47216107	51914213	44212637	77318696
	37921165	12518039	30153098	27778753	47835244			52843807	54211685	50552046	40822762	82724298			48526696	47476856	54198465	45050000	78207358
	38098022	12631385	30334997	28097523	48181163			53227387	54305174	50631580	41455678	82751036			48526696	47854139	55963929	45288469	82728536
	38263131	12680765	30537472	28101655	48898452			53306716	54305174	51193171	41534233	87538989			49898406	48052311	56111227	45530673	84263578
	38337499	12803344	31418720	28262360	49273068			53484905	54404127	51423129	41704823	89201241			49898406	48588783	56226689	45660145	85186841
	38943057	12957642	31423537	28347628	51167080			53564234	60676078	52843833	42032648	90016775			50745428	49858928	56245763	45744006	85745271
	40489863	12989202	31688293	29301348	51447815			53802392	62475924	52863462	42627626	91300144			51507841	49890782	56437236	45974032	89431566
	40820798	13075425	31781572	29460041	52549696			53847998	63697310	52988205	42947237	95225666			51507841	50716784	57224480	46855700	89961591
	40989970	13260725	31942903	30134589	53219263			54142246	63697310	54098389	43363615	96337339			52012243	51012474	58273896	47127845	92074337
	41477991	13495673	32027690	31048212	53380727			54252001	65404499	54449057	43711584				52045938	51270066	59311068	48348801	99376300
	43179191	13571008	32341468	31251386	53787608			54308973	65990998	54717056	45137845				52045938	51380927	59435311	49183705
	44146948	13629964	32420972	32390584	58914658			54333876	70543663	55210973	46348786				52135117	51698671	61588792	49445061
	44491854	13638749	32526990	32926578	59684825			54411477	70543663	56093285	46573202				52251978	52386975	61594652	49883966
	46104134	13680283	33164117	33960955	60776718			54665800	74283968	56764203	47203118				53306716	52655918	61671597	50198581
	46139399	13711472	33197058	36053044	60823524			55107138	74283968	57580940	47405378				53484905	53494975	62725189	51496412
	46186147	13774919	33446689	37438591	61767223			55137424	82513869	58800086	47441829				54142246	54305174	64936983	52186045
	46586612	13944613	33634438	37727789	66392007			55949315	83656926	62967450	47816322				54411477	54568348	65571596	52517407
	47074500	14008510	34395425	40274978	68207912			56567347	83656926	63614929	49862960				55156355	54705951	66301456	53280995
	49173659	14031501	34445467	40832767	73925889			58036652	102175310	65069425	50452902				55730227	54857440	68229261	55164038
	49480382	14252411	34857782	42767025	80173904			58972266	102175310	66783424	50765874				55730227	54974356	69485179	55499705
	50106726	14364192	34925436	43197948				60375112		67411855	51314823				56072909	59285332	71379137	56467737
	50213296	14629613	35359322	46069056				61236895		67571997	51640071				56072909	61616053	71451878	56493918
	51539243	14939652	35437592	48670174				61673769		71063764	52390450				61089987	63697310	71708873	56505619
	52226474	15794918	35825231	49301118				61728735		71082962	52502191				61728735	65143227	74697973	56765712
	52944281	16076187	36413899	49520196				63816813		73013229	52572712				64530746	67357327	81097915	56951080
	53710562	16233561	36741915	49834520				64530746		85319923	52695444				65953798	70543663	83315177	57293004
	54384479	16400215	36793546	49929996				64720061		85526577	52733827				65953798	74283968	84492264	57666779
	55742131	16541630	36846427	50105278				65203044		87873808	53005895				66566617	83656926	110822082	57818264
	55828412	17093798	38485012	50559776				65216950		106418566	55070512				66566617	102175310	127985449	60373516
	60662215	17203453	38541901	50933772				66566934		118810732	55368721				66566934		133410362	61535528
	61079542	17770890	39323535	51408162				68237401			55499376				68536224			62127239
	70111050	17895616	39653384	51636966				70980191			56980729				68536224			62604510
	70701598	18497896	39744869	51769874				72226215			58113332				70980191			65296445
		18866792	39814496	52145184				77882582			59541922				73347552			65296636
		19791331	41221646	52171922				78938105			62509962				73347552			66234844
		19833174	41478157	52341252				79957971			62577924				73688850			67378937
		20215954	42464227	53368923				80489420			62727209				79003608			67607751
		20227126	42709185	54338890				85234079			63416593				79003608			68073034
		20537064	43233540	54394994				87488768			63902496				79792511			71434303
		20707424	43354607	55516241				87539400			67339007				79792511			72094544
		21342191	43529663	55523459				96686485			69404383				80675543			74769667
		21721405	44871545	58174914							88515479				80675543			93469630
		21790413	45758467	58292544											81739425
		22173597	46577671	59086419											81739425
		22837662	51102998	60057100											82582128
		22861435	54523211	60133341											82582128
		23014025		60987735											86139839
		23153726		61732134											86139839
		23525127		62492701											93991867
		24141575		64948148											93991867
		24268004		67903210
		24621569		76146772
		25266961		76940134
		25690725		77602989
		26281616
		26703945
		27804082
		28345400
		28529262
		29058293
		30223817
		30665771
		31498364
		40941529
		41045802
	6447456	4326149	7477966	5779086		978405		7516179		12529069	14868771	14405067			4757105		13648398	13979836	15973649
	7489928	4897182	8897278	6657218		1401263		12107586		14918385	16614316	14969810			10107141		15918034	14376828	16324776
	7494163	5429606	10555191	6770820		1517253		13175301		14995866	16947409	15837338			10369741		16061335	14781270	16783211
	7710591	6649881	11330987	7173582		1800366		13716140		15409852	18026983	15933149			12991884		16535188	14852175	19746464
	7766608	6945219	11500835	7536369		1916441		14017203		15667041	18122050	16016916			13586117		17792708	15580701	20007633
	7889867	7004650	12113942	7673314		2457056		14641433		15950525	18722268	16569631			14438570		19166091	15802366	21058671
	8002295	7538244	12667628	7722986		2495879		14890502		16474352	18800774	16617043			14643829		19566110	15842515	21711655
	8040423	8059777	12847391	8625010		3041488		15275492		17178588	19173714	18609853			15807842		19684999	16067096	21887410
	8483767	8081710	13274707	8633579		3090135		15959979		17497130	19525105	18666606			15872097		19720463	16434856	21929895
	8654437	8168008	13598472	8672093		3218016		16317244		17502845	19584832	19225429			15992358		19991395	17127150	23127879
	9029019	8988970	13642155	9032630		3245108		16443058		17600733	20329021	19646671			16357416		20321287	17355704	23899514
	9081304	9154447	14468673	9193590		3252586		17181427		18985080	20379350	19704410			16670230		21025383	17675639	24207881
	9598492	9255213	14557884	9429466		3413003		18228745		19222673	20426050	20518881			20650528		21501151	17812792	26555479
	9691520	9623228	15213359	9542255		3484109		18361351		19225509	21018681	21884896			20708866		22520974	17935897	27041825
	9973622	9743752	15741012	9795235		3517577		18617650		19770610	21037635	22075187			20886152		22662525	17961721	27414445
	10511330	9812309	15892268	10023933		3647860		19873791		19859382	21228024	22867400			20979397		23049022	18004137	27868293
	10623491	10161257	16468069	10383133		3711851		20115298		19969206	21539114	23152557			21547003		23384016	18178376	27988479
	10721424	10243121	16791348	10623139		3729763		20969981		20123523	21646766	23351121			21874718		23584340	18477693	28959635
	10871194	10415354	16827876	11002701		3808863		21569664		20931097	21960072	23867323			23658135		23589476	18998607	29082991
	11824491	10689108	16861822	11080641		3849159		24680878		21274665	22056778	25307441			24849857		24483510	19431983	33202101
	12412815	11205836	16956206	11106036		3891237		27607769		22005830	22124109	25333115			30818510		24961889	19668246	34747286
	12467087	11824970	17176266	11272868		3963204		28502288		22133100	23415867	28163967			32935422		26147466	19765798	34956847
	12658426	12071555	17347886	11710879		4003652		29164432		23250895	23484987	28309756			33994513		26189432	19878127	35873353
	12988122	12273684	17468656	11710967		4137158		31033725		24775763	24047847	29716385			34382458		27246561	19950063	37375673
	13362441	12299882	17687412	11906597		4243481				25865459	24700564	29826565			37368687		28243815	20379213	41203042
	13634732	12748936	17733740	11908401		4319387				28570492	24922183	32689247					32985471	22629031	43297289
	13753563	12835494	17810351	12089421		4433764				29836309	27964389	33904918					33076001	23044114	44894763
	14051601	13080586	18098814	12107932		4584545				30179115	27999327	35370693					35300060	23884461	47756002
	14530936	13126657	18492518	12193380		4586546				32183070	28177680	35536926					39419195	24200340	49016269
	14563498	13678978	18736776	12341174		4600406				33798109	28668102	35900649					43299757	25533657	50630238
	14639841	13790758	19238280	12413378		4625260				35609351	28847641	36589486					44250221	26193219	50929643
	15019326	13895284	19455983	12485701		4688356				37422647	28939421	38351506					45364817	26194085	56264196
	15449194	14076671	19849120	12665254		4790807				37835311	29564078						46463653	26560904
	15911341	15546742	19926534	12750602		4842889				38346992	30402049						51605162	27476496
	15928536	16329456	20136430	12996525		4951834					31213469							29117207
	16022618	16486468	20383383	13040579		5135524					32852246							29994272
	16244377	17133366	20714649	13054472		5141153					33809287							30568112
	16649747	17338310	21187185	13129944		5182044					40362132							37320501
	16944413	17533152	21585289	13244027		5281240
	17053097	17930948	21712507	13399857		5481474
	17632836	19936836	22364597	13803479		5553737
	17742828	21222104	23028712	14548072		5688427
	18186015	24102068	23088728	14891719		5702715
	18444191	26537764	23384619	14899431		5746147
	19009284		23786356	14909398		5867720
	19089926		24272779	15088972		5870417
	19370683		24355964	15236335		5908717
	19465445		24798720	15336719		5976662
	19803395		25068598	15514037		6036497
	20042024		25670525	15553917		6051921
	22980253		27893357	15649683		6082948
			28265059	15722770		6088645
			28603770	15816869		6159548
			28760656	16513254		6183219
			29481316	16562210		6201626
			32389154	16583720		6283311
			35554737	16777078		6414101
				16836220		6417805
				16935272		7078994
				16974391		7231246
				17065929		7376353
				17088084		7402022
				17584545		7608210
				17930724		9267078
				18413408		9579408
				19620982		9581545
				20061793		9798027
				20289888
				24411832
				26166836
	6786886	5694184	13868587	15034575	7939083	835294		14385482	22206032	11711593	17568382	15572716			7964263	18232223	8144014	16561727	11133841
	8893760	6862195	13958555	15180858	9223671	1588477		17732516	24112030	13283352	17611840	15706572			12934711	18555199	9836835	18103723	15720853
	9201128	7603477	14290855	15583218	10068034	2354763		21934355	24607415	16768588	18147884	15710104			15540096	18889535	12663541	18736121	16770927
	10709418	8312684	17586661	15665691	10080343	2533384		22379856	24852145	18068608	18594415	15770482			15738251	19418625	12731960	18819390	17438448
	10827817	8502717	20066191	17134314	10719935	2755320		22488582	25151851	19242996	18871883	15806321			16071691	21754990	13173874	19692028	17774015
	11135119	9842738	20663201	18393368	11321213	2826026		22994859	26015655	20737307	18948745	16316262			16271565	21782754	13894991	19735505	18153807
	11397512	9875870	20841629	18554994	11406560	2903504		23170396	26236370	20776616	19768349	18227441			16342877	22332025	14355778	20213311	18661597
	11542001	9962472	20883164	18572807	11611071	3029227		23199387	26325236	20850046	19821307	18947182			16661220	22664938	14589521	20736572	18732957
	12939827	10058247	20973065	18636192	11983437	3210413		23287290	26393638	21106528	20007955	20144884			16979197	22792477	14839301	20996543	19040784
	12980977	10371031	21327070	18834416	12224870	3492357		23669184	27656687	21253734	20230166	20220935			16983421	23425247	15207391	21244239	19283604
	13267875	11032409	22664440	20246642	12391221	3501568		23867568	28800709	21290625	20338229	20318351			17004700	23937111	15292790	21253656	19498069
	13916188	11806431	22832832	20321276	12728862	3522878		24104520	28987034	21473921	20666290	20818147			17128004	24047828	15317040	21541923	19628342
	14022014	11817564	23616698	20385328	12899256	3660194		24689274	29024581	21820550	20970726	20975312			17139566	24315832	15437961	21552922	20119842
	14876001	12023495	24036047	20499847	13113902	3662148		25032630	30342967	21985858	21095852	21309998			17481132	25544371	15789256	21923722	20332314
	14879793	12160312	24435096	20553100	13489190	3667381		25047028	30617728	22107423	21619855	21606617			17550765	25710721	15971741	22806683	20535443
	15509511	12438981	25384359	20620679	14255208	3748236		25429045	30911582	22146476	21782186	22135060			17630331	26127664	16137581	23649281	20626711
	15608266	12689715	25771228	20654484	14261790	4037506		25648353	31201429	22601949	21798814	22479802			17771479	26740541	16291062	24053910	20884898
	15730438	12721974	25871464	20773416	14350270	4052984		26187441	31267959	23226516	21856756	23395425			17830618	26993306	16318126	24452183	21254611
	15897029	12745674	26086062	20840092	14885483	4173325		26335314	31348761	23803462	22047916	23578755			17911614	27357357	16521533	24620418	21431833
	16008079	12863977	26669190	21130313	15287893	4314287		26535894	31781249	24259929	22540448	23589399			18038166	27520239	16809041	24920006	21861934
	16378901	12881795	27684558	21228180	15516764	4367599		26582222	32177074	24359540	22919565	24039814			18114016	27595848	16889207	24950991	22202364
	17437861	13019439	27897076	21341568	15672842	4630885		26750592	32377946	24824774	23212579	24457781			18386937	28590330	17617833	25136544	22241273
	17610428	13044783	29010806	21786356	15951286	4727312		27290510	32621224	25124701	23369453	24864760			18688647	28627500	17720261	25750735	22552367
	17706032	13190644	29163348	22200663	16057749	4745449		27332781	33253127	25230670	24072877	25778269			18965643	28915493	17897175	25838171	22861886
	18109339	13229065	29765094	22243031	16646885	4760455		27372510	33268909	25415668	24566565	26058246			19109979	29139487	18309867	26253757	22940672
	18152694	13246151	29871370	22341345	17216784	4786301		27742394	33957472	25571901	24643887	26111227			19181578	29183630	18436209	26700976	23157973
	19652030	13354065	30347386	22423202	17230426	4822503		27755713	34288158	25605363	24674802	26287110			19190327	30295316	18519070	26707998	23543259
	19931047	13442066	30721614	22654624	17584332	4845719		27807551	34770965	25648383	24753129	26308376			19365214	30507029	19215625	26795892	23625864
	20837555	13586319	30977626	22882957	18015207	4859011		27835699	35592718	25900518	25949644	26329896			19618210	30953757	19429171	27081116	24267667
	21221309	13884195	30986802	22887751	18183708	4960106		27956592	36062627	26690818	25967827	26349119			20233754	31088326	19516866	27449291	24631853
	21290586	14061671	31106368	22947476	18297580	4994584		28035494	36341298	27063534	26265330	26815902			20483426	31291646	19845975	27572224	24987898
	21420245	14373619	31321337	23181821	18647548	5133998		28730352	38299369	28146971	26502208	26942247			20509864	31435316	19974092	28154692	26291640
	21857636	14489392	31714424	23181922	18896069	5134939		29041268	38496036	28518623	26871001	27057074			21237565	31642940	20379265	28159434	26301382
	22135377	14495393	32065354	23270016	19202215	5158174		29555107	38919823	28553528	27309118	27237470			21508731	31817243	20394171	28209852	26571545
	22135814	14898150	33066244	23303363	19264729	5258405		29866064	38977669	28938355	27311271	27484784			21667303	32243704	20441995	28505563	26664722
	22702157	14908407	33490715	23534557	19349524	5294944		30318356	39568254	28978921	27649064	27564874			21673218	32804291	20463218	28513274	26676288
	22832826	14916966	33914928	24251284	20170848	5304958		30613296	39782606	29108548	27775636	27746594			21699858	33102371	20821302	28518236	27100820
	22934189	14983544	33991522	24415601	20237328	5324984		30651721	40192723	29348491	27844924	28082562			22251805	35023223	20911168	28991370	27606303
	23031557	14994580	34249864	24684869	20756402	5434122		31072107	40421694	29571865	27911101	28179194			22412876	35758963	21035828	29105339	28237927
	23122101	15052736	34315067	24707592	20906665	5598710		32268374	41386419	29783646	28642402	28506896			22835588	37554421	21468566	29296044	28366438
	23230975	15057473	34491203	24913751	20963944	5789999		32667641	41418436	30259776	29372584	28839200			22975460	37708656	21717502	29542034	28605660
	23716908	15133338	34700568	24936851	21276742	5973429		32736980	41755720	30670423	29847313	29093261			23103860	37738876	22024890	29951466	29153574
	23855663	15579907	35090375	24978586	21386481	6561185		32807936	43087460	30823329	30118930	29113477			23114915	38673184	22024983	30481767	29234286
	24694913	15597136	35259796	25460281	21441045	6767798		33821655	43641211	30881348	30663096	29995024			23127234	39019030	23024375	30832089	29340810
	24810821	15623914	35738448	25632560	21513315	6817117		33994174	43948248	31482347	30817335	30561288			23400736	40001046	23067207	30880395	29526911
	24960367	15755954	35892595	25975398	21569471	7025533		34100216	44594765	32101324	30845177	31779026			23503100	40492139	23193113	32060142	29580791
	25669885	15758032	36226214	26108682	22083808	7520887		35358816	44921981	32445940	31000779	32358269			23523823	40937642	23760486	32461541	29995870
	26421436	15877861	36745446	26768184	22156541	9095913		35705983	45832337	33174318	31030416	33603625			26008873	41401994	23775422	32815976	30326263
	26828660	16012405	36755367	26817549	22457314	9137514		36683150	46039953	33376283	31364144	34111663			26705186	41813145	24776365	32957489	30997557
	27063192	16012405	37210511	26916836	22738878			36704374	46351950	34075668	32269326	34131271			26856612	43932480	25415176	33329688	31678028
	27936919	16100491	37369154	27042822	22970975			37222827	46353738	34475232	32355590	34443270			26925382	44500747	25654185	34669339	31732170
	28875808	16135074	37997774	27119723	23189271			37734336	46633223	34618577	32456431	34473318			26953149	44941527	25668786	34759746	31989972
	28975811	16189279	38004117	27490430	23451316			39562357	46941625	35355682	32873738	34482972			27126252	45444865	25974486	34774403	32081351
	29127365	16448092	38686155	28026073	23478411			40571248	48805897	36052030	33072459	34612213			29104723	45829353	26475423	35110740	32090511
	29138486	16464738	39165634	28117743	23825256			41476376	49869102	36315213	33276007	34630486			29281771	46400588	27081176	36342973	33245585
	29270855	16547317	39263308	28526688	25539058			42542876	50093339	37214759	33883739	34801933			31267291	46482886	27744974	36435829	33370891
	29292430	16777514	39586736	29383362	25757861			43547112	50531384	37885758	34731200	36196889			31948531	47864973	28171436	36488339	33430708
	30343767	16947689	40115792	29440933	26048876			46599869	51480404	38492017	34987659	37283021			33156439	51335648	29130163	36575169	35744463
	30696129	17067608	40128572	29586776	26560353			49034642	51975484	39288807	35150576	37741732			34656447	52136029	29267273	37323041	36036904
	30768343	17072672	40132839	30414352	26657927			49078541	53155656	39416057	35234953	37764473			36726947	53016468	29958679	38489915	36115607
	31587053	17171326	40180294	30429422	27114089			51338357	61469652	42228703	35300221	38511614			38693145	54488056	30760144	38907271	37679723
	31889018	17259626	40383344	30540676	27144455			52308497	63424810	42544913	35402782	38926320			39011448	54746733	30925519	39403785	37695731
	32622251	17303597	40513776	30556590	28356169			54085735	64223325	47942847	36214560	40089434			39872277	56932934	33642346	40016828	38133089
	32662193	17404514	41064596	31494874	28464100			56531016	65349088		36372954	41172100			43339559	79299950		41004201	38277136
	33367161	17470984	41147175	31673001	29529405			59853311	100459059		36911180	42036460			43384127	81457765		42211052	39038702
	34693962	17697388	41295371	31813058	30162167			62983799			38289380	42040071			44954621			42608779	40470808
	35170842	17795670	42308233	32627094	31176999			71922655			38517707	42460162						42973742	40603314
	37805295	17895009	44223243	32687697	31456139						39044056	44167285						43227096	40958580
	40182867	18233094	44342911	32908727	32242157						39325173	44416317						44676082	42488818
		18379805	45032352	33441447	32333744						40692182	46885806						45642593	43430127
		18414872	45275513	33861265	33456967						40752409	49476588						46076103	45207007
		18451478	45865092	35118424	35115012						40903423	51369345						47156753	46930340
		18848302	46264331	35910434	35421432						40916376	51401039						48346982	47023828
		19336299	46290746	36013437	35976796						47009482	55411647						50666069	54722881
		19875450	46331906	36477918	40926969						54672464	58460161						54856755	56166027
		19883801	47704671	37193605	42776643							60011932							56334720
		21526022	47775466	37278320	45311726
		22880336	48560546	38232034	46189245
		23770659	50432154	38317036	46425327
		24310227	51025731	38409334	49727500
		24336391	51796412	42107646	54491245
		24644314	52890888	42574507
		24664904	53756211	44846359
		24938063	55659726
		25984743	55699419
		26814761	56599672
		27480594	58990324
		28604962	59379059
			59747316
			60510204
			64706816
Moyenne	2.59254e+07	1.48882e+07	3.03499e+07	2.61481e+07	3.05492e+07	4.84758e+06		4.03153e+07	4.59516e+07	3.58804e+07	3.35927e+07	3.85161e+07	#DIV/0!		3.70148e+07	4.0616e+07	3.54758e+07	3.52566e+07	4.013e+07	#DIV/0!
SD	1.31252e+07	6.31126e+06	1.11352e+07	1.44424e+07	1.50363e+07	1.80824e+06		1.73586e+07	1.51262e+07	1.68816e+07	1.22481e+07	1.87966e+07	#DIV/0!		2.02738e+07	1.3707e+07	2.05387e+07	1.42967e+07	1.91459e+07	#DIV/0!
SEM	921209	401576	712855	900894	1.22364e+06	167891		1.28671e+06	1.30186e+06	1.2689e+06	855443	1.45453e+06	#DIV/0!		1.46696e+06	1.14225e+06	1.54378e+06	998527	1.47714e+06	#DIV/0!
Par rapport à NoUV
Moyenne	100	57.4271	117.066	100.859	117.835	18.6982		100	113.98	88.9995	83.325	95.5372	#DIV/0!		100	109.729	95.8423	95.25	108.416	#DIV/0!
SD	50.6268	24.3439	42.9507	55.7076	57.9983	6.97479		43.0571	37.5198	41.8739	30.3807	46.6241	#DIV/0!		54.7721	37.0311	55.4879	38.6244	51.7249	#DIV/0!
SEM	3.5533	1.54896	2.74964	3.47494	4.71983	0.647593		3.19161	3.22919	3.14743	2.12188	3.60788	#DIV/0!		3.96317	3.08593	4.17072	2.69764	3.99066	#DIV/0!
variance	171422502108265	3.96707e+13	1.23484e+14	2.07772e+14	2.24593e+14	3.24156e+12		2.99665e+14	2.27108e+14	2.83378e+14	1.49284e+14	3.51198e+14	#DIV/0!		4.08874e+14	1.86577e+14	4.19455e+14	2.03399e+14	3.64382e+14	#DIV/0!
t.test		1.09611e-27	0.000132387	0.864396	0.00223617	2.90285e-47			0.00275925	0.0146387	1.18387e-05	0.353195	#DIV/0!			0.0669655	0.470138	0.316647	0.136867	#DIV/0!
			***	***	***							**

## Sheet: Moyenne par rapport à NoUV
	PLA							IF XAB2							IF XPB
	No UV	1h	2h	4h	16h	XAB2-GFP		NoUV	1h	2h	4h	16h	control		NoUV	1h	2h	4h	16h	control
29.01.20	36.6658	66.7087				3.81437
	38.6843	71.4182			36.6658	4.52804
	40.2698	81.6095			38.6843	5.07077
	44.4143	91.4975			44.4261	5.50613
	52.1433	96.8513			44.4464	5.60432
	52.2031	102.16			47.1451	5.66014
	52.3257	102.521			52.1574	5.69034
	52.3661	102.941			52.3257	5.87222
	55.2144	104.18			55.2144	6.03461
	55.6369	104.575			56.0736	6.64997
	56.0736	104.967			58.0789	6.82565
	56.6154	104.978			59.168	7.42353
	58.0789	105.413			59.6784	7.81427
	58.1145	106.177			59.9135	7.8931
	59.168	108			59.9194	7.93127
	59.9135	110.928			62.3753	8.34275
	60.2885	111.473			64.0388	9.05694
	62.2438	113.019			65.7108	9.07042
	62.3753	113.824			69.2719	9.50125
	64.0388	113.939			70.4339	9.51292
	65.7108	115.924			73.1877	9.70468
	69.5116	117.164			73.5604	9.74993
	73.1877	119.324			73.8421	10.0294
	73.5604	119.424			74.4492	10.3718
	81.676	121.568			76.3565	10.6013
	83.0646	121.871			78.1324	11.3256
	83.1972	123.123			78.1366	11.3703
	83.6303	124.051			80.6198	11.871
	85.501	127.842			81.676	11.936
	87.4515	129.515			83.0646	12.0105
	90.9636	129.578			83.6303	12.122
	91.2429	129.744			87.4515	12.3162
	92.9372	130.322			88.0443	12.4907
	93.1672	130.908			93.1672	13.1357
	93.3767	131.219			93.5347	13.4553
	95.5554	131.487			96.0665	13.4856
	96.1332	131.531			98.1081	13.4882
	98.1081	132.413			104.091	13.6452
	99.4902	133.624			108.708	13.7275
	99.4989	133.686			108.853	13.9701
	100.7	137.295			109.867	14.2474
	100.768	138.799			111.962	14.3339
	103.453	139.022			113.704	14.3828
	105.232	139.385			114.013	14.4315
	105.683	139.469			115.32	14.8734
	109.867	139.556			116.437	15.1504
	110.821	140.993			119.728	15.1625
	111.569	144.309			122.088	15.2756
	111.605	144.922			124.534	15.5266
	112.282	146.496			124.738	15.5902
	113.538	148.197			128.691	16.084
	113.727	148.259			128.966	16.1417
	113.95	148.855			130.476	16.3001
	114.272	148.916			131.842	16.3356
	116.311	149.202			132.357	16.5629
	116.45	153.386			133.021	16.8719
	120.487	154.187			133.081	17.1028
	121.371	154.504			134.85	17.1127
	122.885	155.698			134.892	17.1511
	123.131	157.136			135.738	17.2077
	126.478	160.955			147.723	17.481
	126.728	163.522			153.11	18.1076
	127.053	169.42			154.498	18.6642
	129.122	170.594			154.551	18.9375
	130.602	171.074			159.197	19.3039
	131.414	172.006			162.051	19.379
	131.971	173.441			162.725	19.9723
	133.861	174.582			171.589	20.1142
	134.017	174.959			171.807	20.1267
	135.474	175.362			195.984	20.1671
	139.506	178.183			197.633	20.7908
	140.209	179.52			198.98	21.4106
	141.057	181.073			199.526	21.7016
	142.391	181.836			207.472	21.7645
	144.263	183.72			220.834	21.8234
	149.216	188.963			246.534	23.1608
	151.171	191.003				23.8117
	153.324	195.445				24.1274
	162.13	195.759				24.3388
	163.427	201.963				26.77
	167.616	203.598				27.6631
	177.071	217.707				29.4783
		218.507				30.0456
		222.93				30.3031
		226.761				30.3661
		229.525				32.1477
						32.2566
						33.1313
						34.6306
11.02.20	44.3297		44.47	30.6086	29.275			51.2255	59.67	43.7744	40.8772	50.4849			22.5165	46.2126	40.6973	40.9649	52.9254
	50.2553		44.9266	32.663	33.1025			52.9953	63.0291	47.6505	43.3228	59.8294			32.6894	57.0183	46.7348	44.3339	58.9026
	51.7757		46.3823	40.3346	37.4107			53.2301	63.462	49.404	45.4795	62.8902			35.753	57.1533	52.8568	44.4167	66.3604
	52.8873		49.0156	43.1743	51.6264			53.7316	64.5611	58.6945	46.4665	64.6987			39.4287	60.3298	55.2257	45.7358	68.2594
	59.0501		51.2056	43.2447	52.3165			54.3828	67.2332	59.7253	48.9945	65.222			50.0347	61.1598	58.6602	53.3412	71.2244
	59.2108		51.4907	43.436	53.3623			55.1904	69.6944	60.4792	49.2866	68.7116			51.5401	61.6922	61.342	58.7234	71.9693
	59.916		52.4825	44.4002	56.5493			61.685	71.5033	61.1433	49.6413	69.7943			52.9772	63.5605	62.5506	59.7208	74.6217
	62.9038		55.4633	45.5961	58.0417			62.0811	72.5889	61.546	52.67	70.0956			53.973	64.36	63.482	60.312	76.3206
	65.9839		55.6148	46.2409	61.8872			62.7711	73.5537	63.4416	54.4431	70.1596			55.4017	64.4023	64.849	60.8809	78.2408
	66.7168		55.6227	47.0387	62.4678			66.5475	74.5102	65.0422	54.7588	70.2369			56.2243	66.9245	65.881	61.4895	78.9777
	68.2979		56.3288	47.7515	62.5713			66.9265	75.9355	65.1156	56.2045	77.6445			57.1803	66.9381	67.9904	61.8812	80.685
	69.2278		56.8287	49.0595	64.4069			67.9055	80.4229	65.4744	56.7111	77.9544			58.1604	67.1855	68.77	61.923	81.006
	69.2391		58.7878	49.1666	69.8776			69.3899	80.7365	65.7666	57.8333	77.9985			58.1604	67.2844	68.9593	62.313	87.1684
	69.6768		63.3578	49.4027	71.1491			72.1365	80.7365	66.2917	57.9178	78.419			58.1852	68.4406	69.3764	63.0013	90.2307
	73.4502		63.4465	49.51	71.5979			73.7549	81.5739	66.2953	58.4316	78.6824			62.7556	68.7522	69.6688	63.3778	91.7864
	74.0058		63.6237	50.6146	77.8563			74.7932	81.7378	66.7597	58.5705	79.4651			63.2442	69.3726	71.3411	63.5013	93.1617
	74.545		63.6365	50.8592	78.0337			75.1524	81.8979	66.8158	60.2309	83.2561			63.9471	69.8681	72.8686	64.1053	94.0492
	77.0622		66.2415	50.9069	78.2883			77.2761	81.9798	67.9374	60.4002	83.3271			64.4057	70.1472	73.8393	64.2335	94.8298
	77.9708		66.8157	51.8077	78.6182			78.4069	82.7861	68.5274	60.5217	84.9705			64.781	70.6679	74.0043	64.9547	98.3536
	78.6143		67.8422	52.2222	81.6673			78.5393	83.9844	68.7171	61.1733	88.3928			67.1245	70.8155	75.0231	65.3956	99.9674
	79.6324		68.2769	52.2359	83.3312			79.1107	86.5	69.1492	62.195	88.7793			68.3212	70.8769	75.5768	66.1386	99.9747
	80.3777		68.4833	52.6493	84.3476			79.2262	86.9092	69.226	63.0959	92.0463			70.5516	71.9103	76.1081	66.6079	100.644
	81.1579		70.0895	52.7391	85.7333			80.2088	86.9459	70.1867	63.1958	93.7591			70.714	72.491	76.4998	67.2959	102.046
	81.8703		72.5882	53.0745	89.1095			80.6072	87.5654	71.6807	64.0194	95.6322			70.9705	73.3306	76.9879	67.9461	102.068
	82.1448		72.5941	54.0416	89.6378			81.5272	87.592	71.7486	64.8349	95.7335			72.7052	75.8647	77.9421	69.2089	103.515
	82.4247		72.7954	54.8959	91.7861			81.5429	88.3354	72.5195	64.8464	96.8819			72.8066	75.9984	79.4392	69.7013	105.375
	83.4453		73.713	55.8318	94.9482			84.0197	89.0323	72.6102	64.8718	97.229			73.3679	76.4117	82.1509	70.1876	106.333
	83.5606		74.0162	56.6887	96.306			84.4489	89.8337	73.3542	65.1258	99.8203			76.5603	76.4529	82.1685	70.2565	107.154
	84.4344		74.2921	58.0559	97.6796			84.5444	91.1071	73.808	65.299	102.653			77.3544	77.3213	82.6349	70.9023	107.712
	84.6132		74.3721	58.3744	100.124			85.2492	91.1089	74.2812	65.3161	103.217			77.3544	77.511	84.8687	71.0471	107.725
	85.3241		74.7081	59.4221	100.609			86.3285	91.6284	75.1841	65.6637	104.454			77.5893	77.9503	85.7049	72.2842	112.124
	85.896		75.3005	60.8014	100.881			86.5358	91.6284	75.1985	65.7569	104.891			77.5893	78.7368	86.6404	72.769	112.385
	86.5588		75.5503	60.9962	102.064			87.6897	92.6379	75.626	67.853	105.693			77.6479	79.4278	87.4352	72.7766	113.104
	87.8579		75.9338	61.8219	103.093			88.5212	92.6379	76.2014	68.0647	109.809			77.6479	80.6281	87.5998	72.7818	113.899
	88.2344		76.5418	62.1533	103.691			89.1566	92.8427	76.5143	68.6163	111.047			79.8758	80.7386	88.436	74.4137	121.002
	88.5235		76.679	62.171	104.029			89.6551	94.586	77.2777	68.8033	112.614			80.0107	80.9233	88.8431	74.6567	121.455
	88.6573		76.8425	62.9552	107.931			90.1369	95.7387	78.0691	68.9134	116.68			80.7105	81.4105	89.4283	76.2557	125.944
	89.9531		77.1276	63.132	108.843			90.5889	96.3732	78.7856	69.4405	118.039			82.1095	82.1282	89.5924	76.3229	126.747
	90.2273		77.2844	63.6485	114.465			90.7638	98.4487	78.7924	70.0287	122.964			82.1173	82.2491	89.8158	77.2377	129.364
	90.9813		78.6193	63.8012	116.308			92.465	98.9597	79.7724	71.0075	123.237			83.4713	83.0932	89.96	79.4883	130.552
	91.2194		79.4459	64.3079	116.715			92.7179	98.9597	80.2954	71.7236	123.254			85.5937	83.8856	90.1667	80.2295	131.575
	91.606		79.4471	65.179	117.268			95.0062	99.3587	80.595	72.8426	125.338			86.1283	84.429	91.0416	82.143	133.028
	92.133		79.5877	65.2322	118.023			96.6901	102.219	82.1559	73.16	126.679			87.3141	84.7499	93.5283	82.3156	139.469
	92.1779		79.8201	65.903	121.651			97.6096	102.219	82.1628	73.2808	129.294			87.3141	85.3859	93.9769	82.6669	140.589
	92.6991		79.8235	66.2813	122.258			97.9279	102.503	88.816	73.343	129.362			87.9039	86.8349	94.7621	82.6815	143.141
	94.8791		80.597	67.2834	122.779			99.0156	102.743	90.0767	76.3581	138.59			91.3347	86.8764	96.4801	83.0836	144.125
	95.2107		80.8065	69.8658	123.011			99.7312	102.743	91.7751	76.8884	139.849			94.1973	87.2207	98.9035	83.406	144.456
	100.649		80.9284	70.4777	123.299			99.8527	102.867	92.4227	76.8969	141.196			94.4549	87.5974	99.5763	84.5124	145.756
	102.132		81.5595	71.226	126.453			101.309	103.684	93.717	78.0593	141.708			94.9449	92.384	101.92	85.2574	148.125
	102.387		81.6369	73.2547	127.018			101.487	103.922	97.4377	78.2694	153.592			94.9449	93.345	103.173	86.2899	152.449
	102.816		81.8785	74.9664	129.475			101.727	104.59	97.6692	79.1303	160.051			96.3672	93.8551	103.194	87.8848	153.692
	103.039		81.9319	75.4804	129.978			103.11	105.779	98.6382	79.6543	161.413			96.4602	94.3734	107.734	89.5493	155.459
	103.52		82.4262	76.3465	130.918			103.858	105.961	98.7934	80.8892	161.466			96.4602	95.1233	111.244	90.0234	164.446
	103.969		82.9764	76.3578	132.867			104.013	105.961	99.8892	81.0425	170.808			99.1869	95.5173	111.537	90.5048	167.497
	104.171		85.3709	76.7944	133.885			104.361	106.155	100.338	81.3753	174.051			99.1869	96.5836	111.766	90.7622	169.332
	105.816		85.384	77.0261	139.031			104.516	118.392	103.11	82.015	175.643			100.871	99.1084	111.804	90.9289	170.442
	110.019		86.1034	79.6176	139.794			104.98	121.904	103.148	83.1759	178.147			102.386	99.1717	112.185	91.3861	177.77
	110.918		86.3568	80.0488	142.788			105.069	124.288	103.392	83.7996	185.806			102.386	100.814	113.749	93.1387	178.824
	111.378		86.7952	81.8817	144.607			105.644	124.288	105.558	84.612	187.975			103.389	101.401	115.835	93.6796	183.023
	112.704		87.0256	84.3642	145.046			105.858	127.619	106.242	85.291				103.456	101.913	117.897	96.1066	197.538
	117.326		87.8782	84.9162	146.152			105.969	128.763	106.765	88.0739				103.456	102.134	118.144	97.7662
	119.956		88.0942	88.0116	160.083			106.017	137.646	107.729	90.4367				103.633	102.765	122.425	98.2857
	120.893		88.3823	89.468	162.176			106.169	137.646	109.45	90.8746				103.865	104.134	122.436	99.1582
	125.274		90.1135	92.2787	165.142			106.665	144.944	110.76	92.1037				105.962	104.668	122.589	99.7836
	125.37		90.203	97.9633	165.27			107.526	144.944	112.353	92.4984				106.316	106.336	124.684	102.363
	125.497		90.8813	101.728	167.834			107.585	161.003	114.732	92.5695				107.623	107.947	129.08	103.734
	126.585		91.3914	102.514	180.4			109.17	163.233	122.863	93.3002				108.158	108.47	130.342	104.393
	127.911		93.4592	109.435	185.334			110.375	163.233	124.127	97.2937				109.639	108.743	131.792	105.911
	133.615		93.5952	110.951	200.871			113.242		126.965	98.4448				110.779	109.044	135.625	109.654
	134.448		94.7155	116.206	217.848			115.068		130.309	99.0555				110.779	109.277	138.121	110.321
	136.15		94.8993	117.377				117.805		131.535	100.127				111.46	117.846	141.886	112.245
	136.439		96.0783	125.179				119.487		131.848	100.761				111.46	122.479	142.03	112.297
	140.042		96.291	132.247				120.339		138.661	102.225				121.433	126.616	142.541	112.321
	141.91		97.3443	133.961				120.446		138.699	102.443				122.703	129.49	148.483	112.838
	143.86		98.9438	134.556				124.521		142.465	102.581				128.273	133.891	161.205	113.206
	145.942		99.8351	135.41				125.914		166.478	102.82				131.101	140.225	165.612	113.886
	147.773		99.9754	135.67				126.283		166.881	102.895				131.101	147.66	167.952	114.629
	151.462		100.119	136.146				127.226		171.461	103.426				132.32	166.291	220.29	114.93
	151.697		104.571	137.381				127.253		207.646	107.455				132.32	203.102	254.406	120.009
	164.831		104.726	138.397				129.887		231.826	108.037				132.32		265.19	122.319
	165.965		106.85	139.686				133.146			108.292				136.235			123.495
	190.506		107.746	140.308				138.498			111.182				136.235			124.444
	192.11		107.995	140.669				140.929			113.392				141.093			129.795
			108.184	141.689				151.966			116.179				145.799			129.795
			112.007	141.761				154.026			121.971				145.799			131.66
			112.704	142.222				156.016			122.103				146.477			133.934
			115.384	145.014				157.053			122.395				157.042			134.389
			116.049	147.65				166.311			123.74				157.042			135.314
			117.474	147.802				170.71			124.688				158.61			141.995
			117.803	150.849				170.809			131.393				158.61			143.308
			118.279	150.868				188.657			135.423				160.365			148.625
			121.925	158.073											160.365
			124.335	158.392											162.48
			126.561	160.55											162.48
			138.857	163.187											164.155
			148.15	163.394											164.155
				165.716											171.227
				167.738											171.227
				169.805											186.835
				176.477											186.835
				184.506
				206.906
				209.062
				210.863
28.02.20	47.9359	32.1643	55.5976	42.9667		7.2743				65.1301	77.2926	74.8821					65.3175	66.9036	76.4455
	55.6865	36.4098	66.15	49.4955		10.4182		62.9391		77.5505	86.3665	77.8178			48.37		76.1793	68.8035	78.1259
	55.718	40.3683	78.4763	50.3401		11.2806		68.4894		77.9533	88.098	82.3275			49.6267		76.8651	70.7391	80.3198
	57.3271	49.4409	84.2443	53.3346		13.3855		71.3008		80.1053	93.71	82.8256			62.1756		79.1329	71.0784	94.5011
	57.7436	51.6367	85.5071	56.0318		14.2485		72.8659		81.4422	94.2042	83.261			65.0194		85.151	74.5649	95.751
	58.66	52.0786	90.0654	57.05		18.2679		76.1108		82.9159	97.3243	86.1342			69.099		91.7236	75.6258	100.781
	59.4959	56.0458	94.182	57.4193		18.5565		77.4055		85.6389	97.7324	86.3806			70.0813		93.638	75.8179	103.906
	59.7794	59.9233	95.5185	64.1257		22.613		79.4068		89.2997	99.671	96.7399			75.652		94.207	76.8927	104.747
	63.0756	60.0864	98.6956	64.1894		22.9747		82.965		90.9556	101.498	97.0349			75.9595		94.3767	78.6527	104.95
	64.3445	60.728	101.103	64.4758		23.9255		84.8222		90.9853	101.808	99.9399			76.535		95.6733	81.9658	110.684
	67.1295	66.8317	101.427	67.1563		24.1269		85.4762		91.4942	105.677	102.13			78.2821		97.2521	83.0596	114.376
	67.5182	68.062	107.573	68.353		24.1825		89.3145		98.6905	105.938	102.43			79.7791		100.622	84.5907	115.852
	71.3634	68.8112	108.236	70.1067		25.3752		94.7588		99.9255	106.181	106.664			98.8277		102.899	85.2471	127.087
	72.0551	71.5473	113.109	70.9453		25.9039		95.4481		99.9403	109.262	113.765			99.1069		107.779	85.8363	129.415
	74.1525	72.4434	117.032	72.8262		26.1527		96.7804		102.774	109.36	114.754			99.9554		108.457	85.9598	131.198
	78.1502	72.9531	118.157	74.5265		27.1213		103.31		103.235	110.35	118.872			100.402		110.306	86.1628	133.37
	78.9841	75.5475	122.438	77.1971		27.5971		104.566		103.806	111.967	120.354			103.118		111.909	86.9967	133.945
	79.7123	76.1561	124.841	78.9815		27.7303		109.009		104.608	112.527	121.387			104.686		112.868	88.4291	138.593
	80.8258	77.4367	125.113	81.8035		28.3184		112.126		108.806	114.155	124.07			113.221		112.893	90.9221	139.183
	87.9134	79.472	125.365	82.383		28.6179		128.299		110.592	114.658	131.556			118.925		117.171	92.9961	158.896
	92.2875	83.3138	126.067	82.5718		28.9308		143.514		114.393	115.008	131.69			147.489		119.461	94.1268	166.291
	92.691	87.917	127.703	83.8122		29.4659		148.164		115.055	121.723	146.405			157.62		125.135	94.5937	167.294
	94.1136	89.7503	128.979	87.0687		29.7666		151.606		120.866	122.082	147.163			162.688		125.335	95.1312	171.68
	96.5648	91.2531	129.877	87.0694		30.7592		161.323		128.792	125.008	154.475			164.545		130.395	95.4755	178.87
	99.3478	91.4479	131.503	88.5239		31.5497				134.457	128.401	155.048			178.836		135.167	97.5293	197.186
	101.372	94.7865	131.848	88.5373		32.114				148.518	129.553	169.929					157.859	108.296	207.209
	102.256	95.4301	132.417	89.8831		32.9644				155.099	145.368	176.248					158.293	110.283	214.854
	104.472	97.2523	134.562	90.0207		34.0854				156.881	145.549	183.868					168.936	114.304	228.547
	108.035	97.5948	137.489	90.656		34.1003				167.298	146.476	184.732					188.649	115.816	234.578
	108.278	101.701	139.305	91.7549		34.2034				175.693	149.026	186.623					207.221	122.197	242.302
	108.845	102.532	143.034	92.2917		34.3881				185.109	149.959	190.204					211.769	125.354	243.735
	111.667	103.309	144.652	92.8294		34.8573				194.535	150.436	199.363					217.104	125.358
	114.863	104.658	147.575	94.1644		35.619				196.68	153.683						222.362	127.113
	118.299	115.588	148.151	94.7989		36.0062				199.34	158.039						246.968	131.495
	118.426	121.407	149.711	96.6273		36.8162					162.257							139.347
	119.126	122.575	151.548	96.9548		38.1819					170.776							143.544
	120.775	127.384	154.01	97.0581		38.2237					175.751							146.291
	123.788	128.908	157.524	97.6193		38.5278					209.815							178.606
	125.979	130.356	160.484	98.4675		39.2653
	126.787	133.314	161.429	99.626		40.754
	131.098	148.228	166.278	102.627		41.2912
	131.915	157.783	171.215	108.163		42.2926
	135.21	179.195	171.661	110.718		42.3989
	137.13	197.304	173.861	110.775		42.7218
	141.331		176.848	110.849		43.6257
	141.931		180.465	112.184		43.6457
	144.018		181.083	113.28		43.9305
	144.723		184.375	114.026		44.4356
	147.235		186.381	115.345		44.8805
	149.01		190.857	115.641		44.9952
	170.855		207.383	116.353		45.2259
			210.147	116.897		45.2682
			212.665	117.596		45.7954
			213.831	122.774		45.9714
			219.189	123.138		46.1082
			240.809	123.298		46.7155
			264.344	124.735		47.6879
				125.175		47.7155
				125.911		52.6313
				126.202		53.7633
				126.883		54.8421
				127.047		55.033
				130.739		56.566
				133.312		68.8994
				136.901		71.2215
				145.879		71.2374
				149.157		72.8469
				150.852
				181.498
				194.547
18.05.21	30.7626	25.8097	62.8614	68.1464	35.9851	3.78609			66.3381	34.9871	52.4836	46.5218				77.718	34.7152	70.5972	47.4599
	40.3123	31.1039	63.2692	68.8095	41.8077	7.20001		52.9739	72.032	39.6825	52.6134	46.9216			55.1364	79.0947	41.9312	77.1702	67.0128
	41.7055	34.4639	64.7754	70.6333	45.6349	10.6733		65.5265	73.5119	50.0943	54.2148	46.9322			66.2423	80.5199	53.9805	79.8659	71.4889
	48.542	37.6785	79.7142	71.0071	45.6907	11.4829		66.8573	74.243	53.978	55.5488	47.1126			67.087	82.7752	54.2721	80.2209	74.3344
	49.0787	38.5398	90.953	77.6638	48.5897	12.4889		67.1822	75.1384	57.4863	56.3777	47.2196			68.5083	92.7343	56.1559	83.9406	75.7648
	50.4716	44.6137	93.659	83.3707	51.3151	12.8094		68.6946	77.7189	61.9504	56.6073	48.743			69.3603	92.8527	59.2298	84.1259	77.3837
	51.6609	44.7639	94.4678	84.1033	51.7019	13.1606		69.219	78.3783	62.0678	59.0558	54.4525			69.6643	95.1941	61.1939	86.1627	79.5482
	52.3158	45.1564	94.656	84.184	52.6289	13.7304		69.3056	78.6437	62.2872	59.214	56.6026			71.0213	96.6132	62.1903	88.3932	79.8524
	58.6517	45.5905	95.0635	84.4713	54.3167	14.5517		69.5682	78.8481	63.0534	59.7716	60.1806			72.3767	97.1568	63.255	89.5013	81.1646
	58.8382	47.0082	96.6681	85.3698	55.411	15.8296		70.7091	82.6213	63.4932	60.4354	60.4078			72.3947	99.8541	64.8241	90.5572	82.1996
	60.1386	50.006	102.73	91.7709	56.1651	15.8714		71.3017	86.0389	63.6034	60.7582	60.6988			72.4854	102.036	65.1881	90.5973	83.1138
	63.0772	53.5144	103.493	92.1092	57.6955	15.968		72.0096	86.5956	64.151	61.7383	62.1919			73.011	102.508	65.2915	91.8261	83.6691
	63.5569	53.5649	107.046	92.3995	58.4678	16.5904		73.7565	86.7077	65.1865	62.6477	62.6614			73.0603	103.65	65.8069	91.873	85.7642
	67.4277	54.4983	108.947	92.9186	59.4407	16.5992		74.7822	90.6463	65.6803	63.0215	63.6613			74.5163	108.887	67.3044	93.4536	86.6699
	67.4449	55.1184	110.756	93.16	61.1418	16.6229		74.8252	91.4671	66.0435	64.5869	64.5474			74.8131	109.596	68.0823	97.2174	87.5358
	70.2992	56.3815	115.058	93.4663	64.6139	16.9894		75.9665	92.3449	66.1602	65.0719	66.126			75.1523	111.374	68.7892	100.809	87.9249
	70.7468	57.518	116.812	93.6195	64.6437	18.3006		76.6216	93.2108	67.5208	65.1215	67.1559			75.754	113.986	69.4434	102.534	89.0254
	71.3006	57.6642	117.266	94.1586	65.0447	18.3708		78.2321	93.4096	69.3867	65.2946	69.8912			76.006	115.064	69.5588	104.232	90.6014
	72.0556	57.7717	118.239	94.4608	67.4707	18.9162		78.6738	93.651	71.1102	65.8657	70.4389			76.3513	116.615	70.4258	104.949	91.3568
	72.559	58.3079	120.882	95.7763	69.2946	19.5551		79.2731	94.943	72.4739	67.3371	70.4707			76.8908	117.31	71.6514	106.226	93.1902
	74.2398	58.3887	125.484	96.2199	70.332	19.7968		79.4115	96.1255	72.7714	68.4697	71.8163			77.2141	117.632	71.9931	106.358	94.6414
	79.0397	59.0125	126.448	96.7338	71.0395	20.9902		79.9144	96.7255	74.1613	69.345	73.0649			78.3774	121.871	75.099	107.149	94.8072
	79.8219	59.1274	131.496	98.7499	72.3016	21.4272		81.5274	97.4523	75.0573	69.8137	74.2807			79.6635	122.03	75.5356	109.767	96.1333
	80.2552	59.7886	132.187	100.628	72.7841	21.5095		81.6537	99.34	75.3738	71.9151	77.0097			80.8443	123.257	76.2898	110.14	97.4527
	82.0833	59.9627	134.915	100.82	75.4545	21.5775		81.7724	99.3872	75.9265	73.3899	77.8461			81.4595	124.212	78.0489	111.911	97.7885
	82.2798	60.0402	135.396	101.265	78.0376	21.6946		82.8773	101.444	76.3932	73.6209	78.0044			81.7647	124.4	78.5875	113.817	98.7148
	89.0757	60.5293	137.554	101.636	78.0995	21.8587		82.9171	102.432	76.4932	73.7132	78.5298			81.802	129.139	78.9407	113.847	100.357
	90.3404	60.9282	139.25	102.685	79.7036	21.9639		83.072	103.874	76.6217	73.9472	78.5934			82.5475	130.041	81.9099	114.222	100.709
	94.4493	61.582	140.411	103.72	81.6566	22.0242		83.1561	106.329	77.3749	77.5217	78.6577			83.626	131.946	82.8201	115.438	103.445
	96.1887	62.9322	140.452	103.742	82.4204	22.4824		83.5172	107.733	79.7359	77.576	78.7151			86.2498	132.519	83.194	117.007	104.997
	96.5027	63.7366	140.994	104.013	82.9365	22.6387		83.7529	108.566	80.8493	78.4648	80.1095			87.3141	133.386	84.5968	117.531	106.515
	97.0904	65.1506	141.969	105.075	84.5228	23.2706		85.8288	114.415	84.086	79.1724	80.487			87.4268	133.998	85.143	120.014	112.073
	99.073	65.6753	143.75	105.076	85.6492	23.2749		86.7576	115.003	85.1962	80.2741	80.83			90.5287	134.883	86.8701	120.034	112.114
	100.332	65.7025	145.341	105.475	87.0369	23.3802		88.2926	116.269	85.3005	81.583	81.3689			91.6846	135.626	86.9336	120.249	113.266
	100.334	67.5281	149.878	105.626	87.3203	23.8345		89.2216	116.441	86.4501	81.5894	82.1078			92.3606	137.444	87.1375	121.51	113.663
	102.901	67.5746	151.802	106.674	87.7046	24.0001		90.5727	118.206	86.5713	82.5985	82.347			92.3858	139.834	87.2279	121.543	113.712
	103.493	67.6134	153.724	109.923	91.4274	24.0455		91.4538	118.846	86.9586	82.9766	82.8899			92.4993	141.104	88.7543	121.564	115.522
	103.953	67.9151	154.072	110.667	91.7287	24.1363		91.5686	120.071	87.6754	83.1836	83.8936			94.8521	149.292	89.1374	123.581	117.677
	104.394	67.9652	155.243	111.888	94.0815	24.631		92.8245	120.755	88.3427	83.3813	84.1822			95.5387	152.429	89.6688	124.066	120.369
	104.804	68.2288	155.538	111.991	94.7626	25.377		96.3982	123.637	88.9754	85.566	85.1612			97.3406	160.082	91.5134	124.879	120.917
	105.298	68.2502	156.337	112.925	95.0222	26.244		97.591	123.733	90.3977	87.7474	86.1539			97.9368	160.74	92.5745	125.928	121.936
	107.5	68.5941	157.285	113.03	96.44	27.0755		97.7981	124.741	91.6245	89.1656	86.9129			98.4841	160.868	93.8848	127.673	124.272
	108.129	70.6182	159.052	113.219	96.9374	29.7395		98.0101	128.719	92.0813	89.977	86.9733			98.5313	164.851	93.8852	129.934	124.616
	111.933	70.6963	159.82	115.403	97.1847	30.6761		101.038	130.373	92.2546	91.6026	89.6068			98.5838	166.325	98.1453	131.427	125.07
	112.459	70.8177	161.99	116.183	97.5123	30.8996		101.554	131.291	94.05	92.0634	91.2985			99.7496	170.511	98.3279	131.633	125.863
	113.137	71.4162	162.689	117.737	97.7668	31.8443		101.871	133.222	95.8992	92.1466	94.9363			100.186	172.605	98.8646	136.662	126.093
	116.353	71.4256	164.201	118.341	100.098	34.0895		105.631	134.199	96.9287	92.6114	96.6668			100.274	174.504	101.283	138.373	127.862
	119.759	71.9688	166.554	121.331	100.428	41.2286		106.668	136.919	99.1046	92.6999	100.387			110.867	176.483	101.347	139.884	129.271
	121.605	72.5786	166.599	121.555	101.791	41.4171		109.587	137.539	99.708	93.6969	101.905			113.835	178.236	105.613	140.487	132.132
	122.668	72.5786	168.662	122.005	103.067			109.65	138.471	101.797	96.401	101.963			114.481	187.27	108.337	142.073	135.033
	126.628	72.9779	169.381	122.576	104.119			111.199	138.477	102.991	96.6588	102.895			114.774	189.692	109.355	147.784	135.264
	130.884	73.1346	172.231	122.924	105.109			112.727	139.312	103.419	96.96	102.985			114.892	191.571	109.418	148.169	136.363
	131.337	73.3803	172.259	124.604	106.297			118.188	140.233	105.621	98.2067	103.014			115.63	193.716	110.721	148.232	136.752
	132.024	74.5534	175.351	127.032	106.419			121.202	145.802	107.701	98.8003	103.4			124.064	195.355	112.856	149.665	136.791
	132.075	74.6289	177.524	127.448	107.992			123.906	148.978	108.488	99.4084	103.455			124.819	197.79	115.438	154.918	141.715
	132.675	75.0032	177.967	129.301	115.76			127.092	149.648	111.175	101.224	103.967			133.282	198.141	118.268	155.314	142.249
	132.772	76.0466	179.433	133.184	116.751			130.092	150.957	113.18	103.756	108.134			136.186	204.033	120.086	155.538	142.504
	137.538	76.8179	181.831	133.445	118.07			139.212	153.792	114.991	104.522	111.379			141.335	218.827	124.172	155.908	152.367
	139.135	77.3615	181.889	134.106	120.389			146.486	155.271	117.371	105.008	112.749			147.729	222.239	124.757	159.096	153.613
	139.462	77.3844	181.908	137.858	120.831			146.617	158.797	117.751	105.261	112.817			156.555	225.992	127.704	164.07	153.949
	143.173	77.8316	182.123	137.926	122.899			153.368	183.634	126.154	105.456	115.049			164.936	232.265	131.12	165.849	160.616
	144.542	78.2318	183.044	138.43	123.036			156.266	189.475	127.098	105.762	116.288			166.293	233.367	131.825	167.965	160.684
	147.865	78.4311	183.635	138.502	128.529			161.575	191.86	143.224	108.187	119.763			169.962	242.686	143.406	170.579	162.549
	148.046	78.8885	186.131	142.755	129.018			168.88	195.223		108.66	122.997			184.742			174.787	163.163
	151.242	79.1898	186.506	143.563	133.846			178.805			110.268	125.579			184.932			179.932	166.409
	157.256	80.216	187.177	144.197	136.715			188.157			114.385	125.59			191.627			181.627	172.514
	159.417	80.6615	191.768	147.887	141.314			214.861			115.067	126.845						183.183	173.079
	171.358	81.1118	200.448	148.162	142.58						116.64	131.945						184.263	174.593
	182.135	82.6442	200.991	149.164	146.142						117.48	132.689						190.439	181.116
		83.3092	204.116	151.578	146.558						121.563	140.066						194.559	185.128
		83.4681	205.218	153.481	151.649						121.743	147.806						196.407	192.703
		83.6341	207.89	159.179	159.164						122.194	153.46						201.014	200.049
		85.4327	209.7	162.769	160.553						122.233	153.555						206.087	200.447
		87.6447	209.82	163.236	163.07						140.436	165.536						215.973
		90.0884	210.006	165.342	185.508						163.328	174.643						233.836
		90.1263	216.229	168.586	193.891							179.279
		97.5699	216.549	168.97	205.382
		103.709	220.108	173.292	209.36
		107.744	228.591	173.678	210.43
		110.19	231.282	174.096	225.397
		110.308	234.775	190.859	246.99
		111.704	239.736	192.975
		111.797	243.658	203.273
		113.035	252.286
		117.78	252.466
		121.542	256.546
		124.56	267.382
		129.656	269.144
			270.814
			274.272
Moyenne	100	104.462	127.909	103.733	106.46	23.9681		100	106.665	94.6365	90.4155	104.828	#DIV/0!		100	113.931	101.358	106.179	123.599	#DIV/0!
SD	33.1974	44.9998	53.7305	39.1795	44.7058	13.7873		30.4172	28.865	33.6509	28.7541	36.4655	#DIV/0!		35.7362	44.3639	39.5325	36.1833	39.6519	#DIV/0!
SEM	1.96645	3.04777	3.44681	2.44395	2.97379	0.96295		2.26716	2.51238	2.52936	2.01319	2.82178	#DIV/0!		2.59943	3.72294	2.97145	2.53334	3.0963	#DIV/0!
variance	1098.2	2015.7	2875.08	1529.06	1989.77	189.163		920.066	826.876	1125.99	822.744	1321.77	#DIV/0!		1270.32	1954.3	1553.99	1302.81	1562.69	#DIV/0!
t.test		0.219331	9.12513e-12	0.234643	0.0707243	2.27466e-123			0.0498433	0.115233	0.00170119	0.18323	#DIV/0!			0.00237837	0.731019	0.0894966	1.26467e-08	#DIV/0!
			***			***					**					**			***
