# Supplementary material for: XAB2 dynamics during DNA damage-dependent transcription inhibition
Source: eLife. 2022 Jul 26;11:e77094. doi: 10.7554/eLife.77094 (PMC9436415; doi:10.7554/eLife.77094)
Supplement: Figure 5—figure supplement 4—source data 1. [file elife-77094-fig5-figsupp4-data1.xlsx]

## Sheet: Rloops
		Without RNAseH							With RNAseH
		Area	Mean	IntDen	RawIntDen				Area	Mean	IntDen	RawIntDen
	1	10804	380.67	4112756	4112756			1	7495	259.171	1942486	1942486
	2	16102	509.908	8210532	8210532			2	12632	204.665	2585328	2585328
	3	9659	307.353	2968727	2968727			3	9871	271.878	2683706	2683706
	4	9363	576.505	5397818	5397818			4	12794	519.084	6641166		6641166
	5	18543	533.091	9885109	9885109			5	7990	207.438	1657427	1657427
	6	15442	517.086	7984844	7984844			6	7912	294.526	2330292	2330292
	7	10669	433.122	4620982	4620982			7	11018	269.524	2969615	2969615
	8	10463	345.995	3620141	3620141			8	9306	213.223	1984249	1984249
	9	10780	402.218	4335906	4335906			9	8509	223.578	1902421	1902421
	10	11900	474.109	5641896	5641896			10	7449	349.116	2600564	2600564
	11	10048	349.228	3509039	3509039			11	14454	202.672	2929417	2929417
	12	15785	461.638	7286959	7286959			12	11162	179.923	2008297	2008297
	13	10463	370.481	3876345	3876345			13	9603	154.79	1486450	1486450
	14	10732	456.466	4898791	4898791			14	9856	159.953	1576496	1576496
	15	20272	628.375	12738424	12738424			15	14793	205.791	3044266	3044266
	16	9073	392.435	3560567	3560567			1	7467	160.333	1197207	1197207
	17	11162	588.519	6569049	6569049			2	8756	177.396	1553281	1553281
	18	10271	320.417	3291002	3291002			3	6904	229.515	1584573	1584573
	19	8761	375.132	3286530	3286530			4	6055	168.031	1017427	1017427
	20	10691	501.533	5361888	5361888			5	6916	172.038	1189813	1189813
	21	9994	456.964	4566900	4566900			6	6313	160.493	1013192	1013192	59164705
	22	8500	416.231	3537964	3537964			7	10278	178.396	1833551	1833551
	23	9719	350.664	3408103	3408103			8	9122	217.508	1984110	1984110
	24	10728	502.015	5385614	5385614			9	14811	228.056	3377742	3377742
	25	10748	495.416	5324731	5324731			10	14703	213.583	3140316	3140316
	26	11710	1452.14	17004521		17004521		11	13227	160.893	2128135	2128135
	1	11216	472.933	5304414	5304414			12	8234	182.086	1499294	1499294
	2	9457	376.57	3561222	3561222			13	7370	244.902	1804927	1804927
	3	9119	430.479	3925535	3925535			14	6135	154.495	947828	947828
	4	18015	444.376	8005429	8005429			15	11743	213.205	2503672	2503672
	5	7796	630.405	4914639	4914639			16	13779	213.438	2940957	2940957
	6	11950	481.429	5753074	5753074			17	5605	237.643	1331991	1331991
	7	6978	556.617	3884073	3884073			18	10800	170.173	1837866	1837866
	8	14250	563.803	8034199	8034199			1	12815	330.695	4237861	4237861
	9	11813	495.234	5850195	5850195			2	14131	304.612	4304470	4304470
	10	10296	511.215	5263468	5263468			3	11626	229.181	2664453	2664453
	11	9630	489.624	4715077	4715077			4	9184	138.452	1271540	1271540
	12	7000	757.052	5299361	5299361			5	10389	222.774	2314401	2314401
	13	10654	546.241	5819652	5819652			6	8940	272.552	2436615	2436615
	14	11948	1048.67	12529496	12529496
	15	9014	522.413	4709034	4709034
	16	9231	320.022	2954126	2954126
	17	12998	444.025	5771435	5771435
	18	7226	468.335	3384191	3384191
	19	10859	548.982	5961393	5961393
	20	10253	433.364	4443286	4443286
	21	16861	529.559	8928902	8928902
	22	8677	553.296	4800948	4800948
	23	10029	663.9	6658251	6658251
	1	8179	619.332	5065513	5065513
	2	9546	516.528	4930779	4930779
	3	8684	427.323	3710873	3710873
	4	8633	333.356	2877861	2877861
	5	8657	623.389	5396676	5396676
	6	8761	824.984	7227682	7227682
	7	12002	495.314	5944762	5944762
	8	12188	501.931	6117532	6117532
	9	9018	568.792	5129367	5129367
	10	8310	479.275	3982772	3982772
	11	8926	523.498	4672743	4672743
	12	10672	462.64	4937299	4937299
	13	15162	604.442	9164551	9164551
	14	10298	527.279	5429916	5429916
	15	7109	494.329	3514185	3514185
	16	12594	571.024	7191472	7191472
	17	13414	537.941	7215938	7215938
	18	9274	534.697	4958779	4958779
	19	12151	527.115	6404972	6404972
	20	6638	446.972	2966997	2966997
	21	8778	428.773	3763768	3763768
	22	10426	651.655	6794155	6794155
	23	9734	445.732	4338751	4338751
	24	11565	651.399	7533427	7533427
	25	9512	517.779	4925117	4925117
	26	8682	717.799	6231934	6231934
	Without	with
Average	5.46324e+06	2.15306e+06
SD	1.99774e+06	826920
SEM	232232	134144
Percentage	100	39.4099
SD	36.5669	15.1361
SEM	4.25082	2.45539
Variance	3.93702e+12	6.65801e+11
t.test		2.91613e-22

## Sheet: ARN
		Without RNAseH							With RNAseH
		Area	Mean	IntDen	RawIntDen				Area	Mean	IntDen	RawIntDen
	1	5902	449.675	2653982	2653982			1	7242	278.473	2016703	2016703
	2	5100	381.732	1946832	1946832			2	10294	198.108	2039320	2039320
	3	5063	670.15	3392970	3392970			3	7996	283.84	2269582	2269582
	4	6240	556.549	3472867	3472867			4	7737	179.198	1386454	1386454
	5	6121	546.103	3342698	3342698			5	8913	195.391	1741522	1741522
	6	4133	314.879	1301394	1301394			6	8326	224.847	1872075	1872075
	7	4586	536.342	2459666	2459666			7	13423	246.068	3302969	3302969
	8	4176	532.423	2223399	2223399			8	7866	191.157	1503638	1503638
	9	9235	519.315	4795872	4795872			9	8364	183.124	1531650	1531650
	10	5780	449.074	2595647	2595647			10	12365	216.813	2680892	2680892
	11	5155	482.101	2485230	2485230			11	7975	164.001	1307908	1307908
	12	7408	532.125	3941983	3941983			12	6721	254.061	1707547	1707547
	13	7966	480.732	3829511	3829511			13	7280	271.229	1974550	1974550
	14	3899	672.745	2623033	2623033			1	4989	324.303	1617949	1617949
	15	4444	554.015	2462042	2462042			2	5132	267.931	1375024	1375024
	16	4872	463.517	2258253	2258253			3	4732	302.432	1431110	1431110
	17	3988	498.485	1987958	1987958			4	7530	304.671	2294170	2294170
	18	5536	489.865	2711891	2711891			5	4693	299.408	1405121	1405121
	19	5810	382.375	2221599	2221599			6	4926	294.35	1449966	1449966
	20	4041	289.486	1169812	1169812			7	4603	290.953	1339255	1339255
	21	3650	429.277	1566862	1566862			8	5815	350.105	2035861	2035861	59164705
	1	3485	332.395	1158398	1158398			9	6974	332.945	2321956	2321956
	2	4679	501.419	2346138	2346138			10	7743	346.005	2679119	2679119
	3	4962	578.406	2870050	2870050			11	7025	318.458	2237168	2237168
	4	5207	551.376	2871014	2871014			12	7392	319.102	2358805	2358805
	5	7340	339.703	2493419	2493419			13	7189	372.411	2677262	2677262
	6	5453	385.791	2103717	2103717			14	6756	351.822	2376907	2376907
	7	6495	397.809	2583767	2583767			15	4355	316.191	1377012	1377012
	8	6350	188.043	1194075	1194075			16	4519	396.859	1793404	1793404
	9	4834	571.223	2761293	2761293			17	4613	337.932	1558880	1558880
	10	5271	522.39	2753520	2753520			18	5541	290.646	1610470	1610470
	11	3858	449.355	1733612	1733612			19	7101	343.624	2440075	2440075
	12	3796	407.935	1548521	1548521			1	5609	439.52	2465267	2465267
	13	4826	519.771	2508414	2508414			2	6715	273.491	1836491	1836491
	14	4807	537.06	2581647	2581647			3	5137	337.631	1734409	1734409
	15	5176	528.941	2737799	2737799			4	6771	458.218	3102591	3102591
	16	9853	450.11	4434934	4434934			5	6459	431.096	2784447	2784447
	1	4936	433.271	2138626	2138626			6	5232	537.091	2810062	2810062
	2	7380	412.904	3047234	3047234			7	3722	455.277	1694541	1694541
	3	4839	374.81	1813704	1813704			8	9636	457.698	4410376	4410376
	4	5394	361.721	1951124	1951124			9	6806	483.947	3293743	3293743
	5	7171	506.334	3630919	3630919			10	4839	333.01	1611435	1611435
	6	4456	359.549	1602152	1602152			11	3745	490.621	1837375	1837375
	7	6086	257.929	1569754	1569754			12	3573	441.819	1578620	1578620
	8	4430	372.57	1650483	1650483			13	6509	632.044	4113976	4113976
	9	5602	251.189	1407163	1407163			14	8046	528.653	4253545	4253545
	10	5040	331.058	1668532	1668532			15	5166	429.094	2216702	2216702
	11	5213	368.483	1920900	1920900			16	3526	418.42	1475350	1475350
	12	5151	432.739	2229040	2229040			17	5376	454.975	2445945	2445945
	13	4329	510.892	2211652	2211652			18	5434	368.389	2001825	2001825
	14	4003	601.192	2406571	2406571			1	5492	238.763	1311289	1311289
	15	9507	330.115	3138401	3138401			2	5223	301.999	1577343	1577343
	16	7530	498.484	3753584	3753584			3	4689	388.699	1822608	1822608
	17	4779	385.177	1840761	1840761			4	6219	296.393	1843266	1843266
	18	4000	477.353	1909413	1909413			5	8819	455.54	4017406	4017406
	19	5311	392.063	2082245	2082245			6	5559	367.074	2040563	2040563
	1	5504	354.422	1950738	1950738			7	7922	443.241	3511353	3511353
	2	8135	371.161	3019395	3019395			8	4926	368.031	1812923	1812923
	3	6355	477.953	3037392	3037392			9	7657	430.404	3295601	3295601
	4	5321	463.633	2466989	2466989			10	5376	374.708	2014431	2014431
	5	6207	377.854	2345340	2345340			11	4686	294.792	1381393	1381393
	6	3181	442.022	1406072	1406072			12	4735	335.995	1590934	1590934
	7	5130	450.824	2312729	2312729
	8	7397	582.313	4307371	4307371
	9	3314	350.415	1161276	1161276
	10	5735	382.985	2196418	2196418
	11	5587	404.517	2260035	2260035
	12	7051	427.879	3016973	3016973
	13	4297	564.636	2426243	2426243
	14	4763	420.109	2000981	2000981
	15	4815	425.098	2046845	2046845
	16	6818	433.602	2956298	2956298
	17	3879	467.41	1813083	1813083
	18	7303	476.644	3480928	3480928
	19	5165	380.564	1965614	1965614
	20	4536	448.599	2034844	2034844
	21	5693	314.378	1789756	1789756
	22	4657	391.463	1823041	1823041
	23	5551	400.61	2223787	2223787
	24	6068	496.794	3014543	3014543
	25	4608	312.314	1439143	1439143
	Without	With
Average	2.40237e+06	2.15484e+06
SD	774414	775995
SEM	86046	98551.4
Percentage	100	89.6965
SD	32.2354	32.3012
SEM	3.58171	4.10226
Variance	5.92313e+11	5.92455e+11
t.test		0.060694
