# Supplementary material for: XAB2 dynamics during DNA damage-dependent transcription inhibition
Source: eLife. 2022 Jul 26;11:e77094. doi: 10.7554/eLife.77094 (PMC9436415; doi:10.7554/eLife.77094)
Supplement: Figure 5—figure supplement 4—source data 2. [file elife-77094-fig5-figsupp4-data2.xlsx]

## Sheet: PLA XAB2-Rloops PLA Acq-Rloops
PLA XAB2-Rloops																	PLA ACQ-Rloops
Without RNAseH					1.73897e+07	1.08461e+07	1.00704e+06	With RNAse					8.10547e+06	4.40615e+06	492623		Without RNAseH					7.00979e+06	4.14096e+06	402206	With RNAse					4.96103e+06	2.24819e+06	236980
		area	mean	intden	rawintden					area	mea,	intden	rawintden						area	mea,	intden	rawintden					area	mea,	intden	rawintden
image 1	1	561.048	2573.22	1.4437e+06	28017267			image 1	1	983.689	595.695	585978	11371819				image 1	1	547.65	800.79	438553	8510795			image 1	1	723.982	308.452	223314	4333754
	2	613.659	2766.03	1.6974e+06	32940703				2	646.277	452.452	292409	5674651					2	542.806	749.522	406845	7895465				2	591.965	483.223	286051	5551269
	3	574.909	2501.29	1.43802e+06	27906939				3	804.831	622.221	500783	9718466					3	461.133	1183.91	545940	10594817				3	453.507	158.01	71658.5	1390644
	4	563.83	2797.5	1.57732e+06	30610294				4	782.416	632.294	494717	9600747					4	608.712	919.266	559568	10859289				4	562.594	306.844	172628	3350123
	5	587.379	3693.94	2.16974e+06	42107199				5	720.633	617.963	445324	8642211					5	633.858	1262.34	800147	15528086				5	528.842	276.434	146190	2837040
	6	506.839	3709.89	1.88032e+06	36490440				6	639.32	641.989	410437	7965156					6	455.619	975.904	444641	8628945				6	477.983	477.544	228258	4429698
	7	355.035	1868	663205	12870511				7	1051.81	712.317	749222	14539809					7	564.449	1807.09	1.02001e+06	19794891				7	515.445	239.838	123623	2399100
	8	577.382	2700.93	1.55947e+06	30263896				8	701.825	685.679	481226	9338945					8	417.643	778.963	325328	6313494				8	532.14	344.944	183558	3562235
	9	595.315	2407.94	1.43348e+06	27818882				9	1002.65	892.81	895177	17372299					9	499.625	729.039	364246	7068760				9	605.93	588.311	356475	6917944
	10	433.874	2869.82	1.24514e+06	24163847				10	1005.12	506.94	509538	9888377					10	536.262	419.713	225076	4367949				10	621.285	437.022	271515	5269170
	11	558.42	1136.12	634432	12312132				11	836.11	638.414	533784	10358898					11	620.77	476.333	295693	5738388				11	526.987	715.267	376936	7315031
	12	371.06	510.376	189380	3675221				12	735.473	236.924	174252	3381622					12	448.354	461.011	206696	4011261				12	525.441	204.796	107608	2088300
	13	437.584	1257.02	550052	10674609				13	1020.27	498.645	508755	9873180					13	513.074	471.974	242158	4699442				13	581.917	406.72	236677	4593093
	14	595.624	1549.18	922726	17906929				14	828.947	563.379	467012	9063086					14	466.234	955.566	445518	8645963				14	497.512	655.925	326331	6332954
	15	424.444	1285.81	545755	10591226				15	879.549	702.516	617897	11991244					15	491.226	1150.61	565210	10968781				15	644.525	393.897	253877	4926868
	16	349.83	494.042	172831	3354053				16	816.992	487.015	397888	7721623					16	483.445	1120.18	541548	10509569				16	544.816	224.892	122525	2377778
	17	474.994	1940.71	921825	17889440				17	950.865	404.182	384323	7458377					17	687.861	968.614	666271	12930028				17	455.001	233.122	106071	2058471
	18	374.152	1232.07	460983	8946091				18	915.567	722.426	661430	12836072					18	599.746	904.667	542570	10529418				18	507.2	285.339	144724	2808592
	19	470.563	2140.86	1.00741e+06	19550303				19	1129.15	569.095	642596	12470568					19	631.127	944.86	596327	11572647				19	356.272	574.918	204827	3974982
	20	439.594	1402.39	616484	11963818				20	1153.84	747.435	862419	16736570					20	444.335	1034.74	459772	8922585				20	463.143	503.445	233167	4524965
	21	469.12	1258.34	590314	11455957				21	998.89	594.469	593809	11523791					21	550.948	1138.36	627175	12171301				21	875.787	286.588	250990	4870854
	22	407.491	1193.12	486185	9435167				22	1009.61	788.998	796579	15458841					22	392.29	1647.18	646174	12540010				22	613.298	469.757	288101	5591044
	23	451.909	2132.97	963909	18706139			image 2	1	1058.97	556.82	589657	11443215				image 2	1	697.754	1248.78	871344	16909774				23	785.56	192.133	150932	2929071
	24	488.237	1836.37	896583	17399573				2	1339.29	791.614	1.0602e+06	20574827					2	565.582	885.754	500967	9722039				24	620.409	388.277	240891	4674860
	25	405.997	1917.39	778455	15107119				3	1114.16	816.471	909680	17653745					3	667.301	1209.23	806922	15659572				25	668.486	664.666	444320	8622716
	26	452.888	1980.34	896875	17405239				4	918.865	723.064	664399	12893686					4	823.794	709.602	584566	11344402				26	759.125	514.26	390387	7576072
	27	511.58	3546.16	1.81415e+06	35206313				5	874.396	573.287	501280	9728114					5	501.635	1347.35	675878	13116456				27	502.047	166.288	83484.5	1620146
	28	438.409	3144.47	1.37856e+06	26753108				6	851.98	718.667	612291	11882445					6	462.112	782.835	361758	7020467				28	772.317	200.238	154647	3001166
	29	392.342	2049.15	803967	15602222				7	593.047	713.132	422921	8207437					7	813.231	748.578	608766	11814053				29	753.715	331.26	249675	4845339
	30	449.487	1716.51	771548	14973087				8	970.291	413.645	401356	7788939					8	548.011	465.448	255071	4950040				30	441.5	194.44	85845.4	1665962
	31	506.942	3342.71	1.69456e+06	32885581				9	944.372	609.796	575874	11175731					9	667.146	604.098	403022	7821262			image 2	1	632.57	559.175	353717	6864427
	32	448.766	2767.43	1.24193e+06	24101547				10	879.085	792.887	697014	13526644					10	748.716	637.643	477414	9264956				2	507.973	334.448	169890	3296985
	33	351.067	1944.66	682707	13248991				11	817.559	389.029	318054	6172333					11	443.562	549.189	243599	4727423				3	408.316	462.764	188954	3666940
	34	570.22	3189.2	1.81855e+06	35291688				12	882.073	640.919	565338	10971260					12	378.377	496.644	187919	3646857				4	532.707	349.126	185982	3609269
	35	387.962	3129.01	1.21394e+06	23558301			image 3	1	545.641	253.057	138078	2679619					13	850.28	1235.37	1.05041e+06	20384793				5	506.015	345.39	174773	3391732
	36	581.865	2953.87	1.71876e+06	33355114				2	788.909	329.946	260297	5051467					14	437.275	1034.13	452201	8775653				6	461.442	327.873	151294	2936099
image 2	1	411.047	1600.99	658081	12771083				3	783.705	291.222	228232	4429192					15	582.432	1477.99	860832	16705781				7	446.293	763.579	340780	6613359
	2	647.565	1550.6	1.00411e+06	19486378				4	967.869	129.793	125622	2437897					16	592.79	1137.32	674189	13083673				8	374.461	439.922	164734	3196912
	3	655.449	3718.4	2.43722e+06	47298029				5	1307.55	323.919	423540	8219451					17	609.073	1102.51	671510	13031691				9	375.749	387.403	145567	2824944
	4	672.608	2627.07	1.76699e+06	34291112				6	1057.79	510.947	540473	10488715					18	433.05	859.117	372040	7220021				10	380.026	464.192	176405	3423418
	5	499.831	2121.53	1.0604e+06	20578788				7	866.151	368.397	319088	6192390				image 3	1	393.012	365.41	143610	2786982				11	501.068	283.955	142281	2761181
	6	661.066	1938.72	1.28162e+06	24871832				8	759.022	209.618	159105	3087671					2	464.07	325.379	150998	2930359				12	612.525	176.888	108348	2102670
	7	650.554	2788.86	1.8143e+06	35209368				9	1006.46	397.841	400413	7770631					3	752.014	316.623	238105	4620793				13	590.059	723.529	426924	8285129
	8	571.766	3241.24	1.85323e+06	35964798				10	1029.76	913.736	940924	18260096					4	727.383	360.363	262122	5086879				14	645.452	424.567	274038	5318124
	9	502.923	1481.19	744923	14456378				11	937.622	90.701	85043	1650392					5	525.544	369.304	194086	3766534				15	511.168	288.175	147306	2858694
	10	301.084	719.884	216746	4206283				12	786.951	287.151	225973	4385365					6	514.208	421.697	216840	4208114				16	476.643	760.819	362639	7037574
	11	306.082	1427.28	436866	8478062				13	775.151	164.692	127661	2477464					7	744.285	366.237	272585	5289934				17	684.666	389.967	266997	5181492
	12	397.598	995.116	395656	7678318				14	922.833	201.732	186165	3612816					8	566.716	525.064	297562	5774650				18	538.53	518.433	279191	5418143
	13	468.811	2083.72	976872	18957704				15	560.223	266.423	149256	2896549					9	667.97	414.817	277085	5377267				19	437.121	736.457	321920	6247362
	14	543.322	2150.04	1.16816e+06	22669983				16	592.274	356.133	210928	4093388					10	821.733	40.533	33307.4	646382				20	575.012	783.312	450414	8740980
	15	345.193	1909.94	659298	12794695				17	613.607	300.578	184437	3579279					11	666.579	590.249	393448	7635467				21	460.824	514.449	237071	4600721
	16	759.795	3259.95	2.4769e+06	48068017			image 4	1	302.784	847.097	256488	4977543					12	640.093	438.434	280638	5446224				22	688.788	546.969	376745	7311328
	17	747.583	3751.99	2.80492e+06	54433807				2	461.288	538.292	248307	4818791					13	752.581	407.72	306843	5954754				23	576.3	519.183	299205	5806542
	18	497.255	1956.29	972773	18878170				3	435.214	351.664	153049	2970153					14	474.015	507.175	240408	4665499				24	623.449	546.962	341003	6617688
	19	695.899	2109.26	1.46783e+06	28485590				4	320.098	744.31	238252	4623656					15	622.779	373.507	232613	4514207				25	507.045	793.141	402159	7804510
	20	502.15	2042.31	1.02555e+06	19902292				5	521.783	953.679	497613	9656955					16	524.256	313.49	164349	3189452				26	548.835	685.164	376042	7297686
	21	480.096	1519.62	729565	14158347				6	451.703	463.45	209342	4062600					17	446.241	270.655	120778	2343876				27	492.72	475.426	234252	4546020
	22	721.973	2729.93	1.97093e+06	38249035				7	522.865	1134.13	592998	11508038					18	466.904	366.272	171014	3318793				28	396.258	263.991	104609	2030092
	23	639.939	3802.43	2.43332e+06	47222420				8	503.232	388.949	195732	3798477					19	489.835	336.263	164713	3196517				29	390.641	291.248	113773	2207949
									9	448.869	393.105	176453	3424338					20	500.192	401.978	201066	3902000				30	479.271	530.283	254150	4932166
image 3	1	643.803	1039.6	669296	12988716				10	459.845	342.61	157547	3057448					21	573.466	647.613	371384	7207285				31	462.988	355.706	164688	3196016
	2	591.501	985.337	582828	11310683				11	616.596	950.897	586319	11378432					22	598.2	475.601	284504	5521248				32	489.629	327.057	160136	3107696
	3	617.73	746.098	460887	8944218				12	624.583	1038.71	648760	12590195					23	378.223	64.137	24258	470765				33	459.999	377.756	173768	3372230
	4	655.449	1213.23	795212	15432320				13	476.849	659.064	314274	6098979					24	617.111	613.495	378595	7347219				34	363.486	183.575	66727	1294940
	5	710.018	1447.59	1.02782e+06	19946371				14	387.601	812.341	314864	6110432					25	504.881	402.784	203358	3946482				35	337.36	226.94	76560.7	1485778
	6	843.427	1057.8	892177	17314070				15	698.218	1246.35	870226	16888087					26	483.806	378.036	182896	3549376				36	509.673	378.853	193091	3747236
	7	584.39	627.836	366901	7120288				16	474.067	282.971	134147	2603329					27	481.229	688.111	331139	6426267				37	695.435	428.934	298296	5788897
	8	691.158	681.619	471107	9142560				17	555.895	183.978	102273	1984757					28	504.108	429.085	216305	4197741				38	310.668	433.194	134580	2611729
	9	574.239	127.222	73055.9	1417762				18	516.372	529.066	273195	5301772					29	685.851	631.616	433195	8406813				39	442.737	253.034	112027	2174064
	10	668.383	84.639	56571.4	1097856				19	534.253	584.447	312242	6059546					30	597.891	392.373	234596	4552703				40	676.06	731.308	494409	9594765
	11	658.231	637.74	419781	8146496				20	500.656	660.569	330718	6418090					31	585.782	471.591	276249	5361048				41	455.31	671.866	305908	5936610
	12	718.108	819.289	588338	11417606				21	510.395	576.903	294448	5714228					32	388.992	754.747	293591	5697587				42	576.352	940.948	542317	10524503
	13	572.59	477.397	273353	5304838				22	509.107	757.391	385593	7483026					33	555.534	650.871	361581	7017040			image 3	1	541.467	702.287	380265	7379632
	14	431.298	408.758	176296	3421306				23	509.003	504.367	256724	4982134					34	578.722	217.687	125981	2444848				2	589.801	721.932	425796	8263230
	15	601.034	886.591	532872	10341200				24	558.008	775.897	432956	8402189					35	551.566	723.508	399063	7744428				3	486.176	287.128	139595	2709057
	16	596.242	683.823	407724	7912512				25	389.405	652.96	254266	4934416					36	464.689	528.399	245541	4765102				4	747.274	361.721	270304	5245674
	17	744.388	1182.73	880413	17085785				26	469.79	707.625	332435	6451416					37	498.44	330.998	164983	3201743				5	502.305	530.336	266390	5169718
	18	527.812	1211.18	639277	12406151				27	493.957	627.46	309938	6014832					38	381.675	136.687	52169.9	1012438				6	755.054	539.038	407003	7898518
	19	470.769	1016.67	478618	9288317				28	340.813	593.073	202127	3922585					39	329.631	272.437	89803.6	1742778				7	692.292	475.258	329017	6385085
	20	630.612	1026.97	647620	12568061				29	342.771	884.524	303189	5883856				image 4	1	504.211	1380.79	696211	13511056				8	497.616	420.075	209036	4056666
	21	648.338	820.725	532107	10326367													2	650.914	1025.02	667203	12948099				9	619.379	572.268	354450	6878658
	22	532.088	1111.38	591351	11476090													3	419.91	718.39	301659	5854157				10	786.126	452.457	355688	6902684
	23	469.79	1146.09	538421	10448895													4	477.416	493.608	235656	4573278				11	808.026	569.484	460158	8930077
	24	705.741	1455.27	1.02705e+06	19931403													5	562.336	639.261	359479	6976250				12	637.208	587.192	374163	7261216
	25	551.309	1277.54	704321	13668439													6	445.004	219.828	97824.4	1898433				13	786.229	454.822	357594	6939670
	26	825.34	908.245	749611	14547364													7	343.338	530.376	182098	3533897				14	666.064	568.173	378440	7344209
image 4	1	949.886	1026.15	974722	18915982													8	610.722	163.151	99639.6	1933660				15	472.882	571.951	270465	5248798
	2	582.896	2040.83	1.18959e+06	23085888													9	564.397	789.593	445644	8648417				16	712.182	409.629	291730	5661478
	3	676.936	1419.57	960956	18648840													10	429.082	464.757	199419	3870034				17	810.036	657.003	532196	10328080
	4	514.362	1146.69	589813	11446226													11	349.212	341.598	119290	2315008				18	642.721	616.219	396057	7686104
	5	773.09	1425.45	1.102e+06	21386103													12	388.735	416.477	161899	3141902
	6	530.285	1575.59	835511	16214390													13	385.849	605.212	233521	4531828
	7	316.543	1916.81	606752	11774970													14	496.894	1073.65	533489	10353179
	8	395.124	1140.18	450514	8742925													15	437.327	1391.45	608520	11809277
	9	746.758	1070.63	799502	15515566													16	339.937	1012.15	344067	6677146
	10	621.543	714.952	444373	8623747													17	358.642	592.93	212649	4126792
	11	642	398.467	255816	4964503													18	343.441	436.55	149929	2909609
	12	510.034	165.405	84362.3	1637181													19	322.572	377.898	121899	2365644
	13	661.169	677.689	448067	8695430													20	356.787	1220.98	435631	8454087
	14	554.761	1072.15	594789	11542798													21	388.786	728.496	283229	5496503
	15	717.335	732.357	525345	10195136													22	503.799	629.126	316953	6150961
	16	474.634	940.192	446247	8660111													23	605.569	435.4	263665	5116822
	17	818.023	761.081	622582	12082159													24	399.092	1044.74	416946	8091484
	18	798.236	691.425	551920	10710860													25	410.738	852.456	350136	6794928
	19	552.597	1298.69	717653	13927164													26	429.649	254.395	109300	2121145
	20	552.958	1127.59	623510	12100182													27	290.16	988.334	286775	5565309
	21	652.203	1116.07	727906	14126144
	22	485.352	1313.57	637541	12372467
	23	422.95	544.941	230483	4472878
	24	608.97	1459.94	889062	17253633
	25	541.879	1934.64	1.04834e+06	20344644
	26	445.571	1473.34	656478	12739962
	27	666.218	1295.44	863048	16748781
	28	625.665	2049.36	1.28221e+06	24883344
	29	794.629	526.362	418262	8117028
	30	591.038	423.368	250227	4856034
	31	487.722	609.629	297330	5770141
PLA XAB2-Rloops
without RNAseH			1.73897e+07	1.08461e+07	1.00704e+06		100	5.79099
with RNAseH			8.10547e+06	4.40615e+06	492623		46.6106	2.83283
PLA AQR-Rloops
without RNAseH			7.00979e+06	4.14096e+06	402206		100	2.31289
with RNAseH			4.96103e+06	2.24819e+06	236980		70.7729	1.36276
	PLA XAB2-Rloops		PLA AQR-Rloops
	without	with	without	with
variance	1.16625e+14	1.91715e+13	1.69858e+13	1.69858e+13
t.test		9.6509e-12		4.11941e-05

## Sheet: IF XAB2-Rloops 
IF XAB2																	IF Rloops
Without RNAseH					4.3994e+07	1.51575e+07	1.64406e+06	With RNAse					4.05815e+07	1.27361e+07	1.42394e+06		Without RNAseH					3.41119e+07	1.38911e+07	1.49791e+06	With RNAse					2.17208e+07	6.77682e+06	743853
		area	mean	intden	rawintden					area	mea,	intden	rawintden						area	mea,	intden	rawintden					area	mea,	intden	rawintden
image 1	1	556.616	3930.9	2.188e+06	42461596			image 1	1	692.395	4428.49	3.06626e+06	59505582				image 1	1	556.616	2338.57	1.30169e+06	25261235			image 1	1	692.395	3232.18	2.23795e+06	43430818
	2	619.791	3268.23	2.02562e+06	39310285				2	430.989	4993.51	2.15215e+06	41765728					2	619.791	2102.23	1.30294e+06	25285635				2	430.989	2565.93	1.10589e+06	21461451
	3	627.932	3157.23	1.98253e+06	38474042				3	431.761	4188.3	1.80834e+06	35093723					3	627.932	2950.11	1.85247e+06	35949989				3	431.761	2622.01	1.13208e+06	21969797
	4	624.325	3237.45	2.02122e+06	39224946				4	395.176	2657.01	1.04999e+06	20376646					4	624.325	2389.17	1.49162e+06	28947196				4	395.176	2584.55	1.02135e+06	19820898
	5	597.067	3321.13	1.98293e+06	38481918				5	416.148	4673.29	1.94478e+06	37741506					5	597.067	1768.45	1.05588e+06	20490993				5	416.148	2444.55	1.0173e+06	19742200
	6	695.796	5396.25	3.75469e+06	72865598				6	438.821	4259.76	1.86927e+06	36276087					6	695.796	2686.85	1.8695e+06	36280585				6	438.821	2556.92	1.12203e+06	21774720
	7	881.816	4530.44	3.99501e+06	77529432				7	573.672	6074.4	3.48472e+06	67626294					7	881.816	3727.61	3.28706e+06	63790530				7	573.672	2852.31	1.63629e+06	31754780
	8	862.905	4094.13	3.53284e+06	68560246				8	523.792	4207.52	2.20387e+06	42769469					8	862.905	3140.38	2.70985e+06	52588838				8	523.792	2440.98	1.27857e+06	24812596
	9	593.717	3420.85	2.03101e+06	39414984				9	658.592	4661.03	3.06972e+06	59572670					9	593.717	2583.28	1.53374e+06	29764560				9	658.592	2419.9	1.59373e+06	30928717
	10	508.334	3600.95	1.83048e+06	35523334				10	408.367	2708.25	1.10596e+06	21462894					10	508.334	2554.26	1.29842e+06	25197791				10	408.367	1986.13	811070	15740072
	11	938.034	4250.23	3.98685e+06	77371091				11	571.972	4109.97	2.35079e+06	45620634					11	938.034	2739.61	2.56984e+06	49871770				11	571.972	2318.84	1.32631e+06	25739162
	12	554.916	3037.33	1.68546e+06	32709017				12	492.308	2953.02	1.4538e+06	28213161					12	554.916	1555.28	863051	16748839				12	492.308	2556.78	1.25872e+06	24427427
	13	535.18	3058.93	1.63708e+06	31770048				13	554.607	5737.22	3.1819e+06	61749683					13	535.18	1770.39	947480	18387309				13	554.607	3137.44	1.74005e+06	33768269
	14	489.216	3230.18	1.58026e+06	30667372				14	642.824	1568.27	1.00812e+06	19564157					14	489.216	2154.22	1.05388e+06	20452138				14	642.824	1709.79	1.09909e+06	21329607
	15	541.724	2666.22	1.44435e+06	28029930				15	558.214	3035.8	1.69462e+06	32886784					15	541.724	2115.64	1.1461e+06	22241755				15	558.214	1671.53	933072	18107705
	16	761.959	2707.73	2.06318e+06	40039246				16	381.933	4146.14	1.58355e+06	30731181					16	761.959	1507.86	1.14893e+06	22296711				16	381.933	2065.5	788882	15309473
	17	489.216	4014.52	1.96397e+06	38113812				17	445.52	3039.57	1.35419e+06	26280144					17	489.216	2229.7	1.09081e+06	21168789				17	445.52	1715.97	764498	14836258
image 2	1	664.26	3263.87	2.16806e+06	42074605				18	461.545	4909.64	2.26602e+06	43975681				image 2	1	664.26	2597.28	1.72527e+06	33481551				18	461.545	2211.36	1.02064e+06	19807184
	2	679.616	3394.39	2.30689e+06	44768679				19	451.188	4268.67	1.92597e+06	37376482					2	679.616	2482.15	1.68691e+06	32737072				19	451.188	2457.81	1.10893e+06	21520559
	3	901.294	2122.23	1.91275e+06	37119936				20	462.679	3688.68	1.70668e+06	33120679					3	901.294	1655.2	1.49182e+06	28951058				20	462.679	2116.65	979329	19005397
	4	746.913	2750.22	2.05417e+06	39864440				21	529.254	2889.75	1.52941e+06	29680617					4	746.913	2120.27	1.58366e+06	30733278				21	529.254	2027.95	1.0733e+06	20829066
	5	796.793	3247.4	2.58751e+06	50214566				22	431.71	3509.83	1.51523e+06	29405368					5	796.793	2091.22	1.66627e+06	32336571				22	431.71	1956.05	844445	16387764
	6	1021.87	3693.05	3.77382e+06	73236839				23	611.443	2539.3	1.55264e+06	30131363					6	1021.87	1937.31	1.97968e+06	38418776				23	611.443	2184.72	1.33583e+06	25923851
	7	1067.42	2184.68	2.33198e+06	45255591				24	497.77	4033.45	2.00773e+06	38963150					7	1067.42	1858.82	1.98415e+06	38505479				24	497.77	2981.41	1.48406e+06	28800430
	8	710.843	3904.17	2.77525e+06	53858031				25	810.757	3776.85	3.06211e+06	59424926					8	710.843	2302.61	1.63679e+06	31764435				25	810.757	2643.07	2.14289e+06	41586100
	9	1407.46	3419.59	4.81295e+06	93402813				26	568.777	4340.38	2.46871e+06	47909077					9	1407.46	2441.73	3.43665e+06	66693483				26	568.777	3098.76	1.7625e+06	34204132
	10	760.877	1941.81	1.47748e+06	28672819				27	512.198	3667.03	1.87825e+06	36450279					10	760.877	1429.18	1.08743e+06	21103327				27	512.198	2198.55	1.12609e+06	21853568
	11	741.708	2530.78	1.8771e+06	36428082				28	491.432	5585.73	2.74501e+06	53271090					11	741.708	1555.28	1.15357e+06	22386722				28	491.432	3515.81	1.72778e+06	33530286
	12	1010.79	2141.69	2.1648e+06	42011329				29	488.65	3918.91	1.91498e+06	37163058					12	1010.79	1861.92	1.88201e+06	36523386				29	488.65	1991.37	973084	18884197
image 3	1	608.042	4586.85	2.789e+06	54124883			image 2	1	432.328	615.182	265960		5161374			image 3	1	608.042	4010.3	2.43843e+06	47321604			image 2	1	432.328	2058.43	889917	17270219
	2	622.883	3569.34	2.22328e+06	43146241				2	425.939	3279.28	1.39677e+06	27106508					2	622.883	3717.83	2.31577e+06	44941180				2	425.939	2225.27	947828	18394072
	3	691.519	5322.71	3.68076e+06	71430773				3	477.571	3981.94	1.90166e+06	36904641					3	691.519	3783.45	2.61633e+06	50773857				3	477.571	2390	1.14139e+06	22150514
	4	413.52	6009.07	2.48487e+06	48222793				4	455.104	3180.02	1.44724e+06	28085950					4	413.52	4708.97	1.94725e+06	37789477				4	455.104	2222.87	1.01164e+06	19632383
	5	453.249	4727.6	2.14278e+06	41583928				5	451.394	3646.26	1.6459e+06	31941216					5	453.249	3700.03	1.67704e+06	32545500				5	451.394	2383.73	1.076e+06	20881496
	6	384.922	5785.89	2.22711e+06	43220598				6	462.988	4510.55	2.08833e+06	40527307					6	384.922	4622.87	1.77944e+06	34532857				6	462.988	2404.88	1.11343e+06	21607849
	7	463.606	4984.14	2.31068e+06	44842322				7	438.563	3655.24	1.60305e+06	31109718					7	463.606	3669.81	1.70135e+06	33017284				7	438.563	2409.79	1.05685e+06	20509735
	8	479.323	5846.01	2.80213e+06	54379607				8	424.908	829.951	352653		6843774				8	479.323	3596.9	1.72408e+06	33458373				8	424.908	2726.28	1.15842e+06	22480902
	9	408.986	1521.05	622089	12072591				9	661.066	3165.78	2.09279e+06	40613820					9	408.986	4997.2	2.04378e+06	39662764				9	661.066	2021.43	1.3363e+06	25932962
	10	569.292	1369.45	779618	15129687				10	543.682	4089.91	2.22361e+06	43152649					10	569.292	5039.31	2.86884e+06	55674281				10	543.682	2327.49	1.26541e+06	24557336
	11	552.339	3130.31	1.72899e+06	33553819				11	457.371	4769.66	2.18151e+06	42335520					11	552.339	2812.85	1.55365e+06	30150955				11	457.371	3032.78	1.38711e+06	26918968
	12	429.7	3092.16	1.3287e+06	25785477				12	475.716	3786.43	1.80126e+06	34956294					12	429.7	3149.7	1.35343e+06	26265394				12	475.716	2181.15	1.03761e+06	20136416
	13	504.211	5355.25	2.70018e+06	52401098				13	411.614	3569.45	1.46923e+06	28512744					13	504.211	6147.23	3.0995e+06	60150603				13	411.614	2618.28	1.07772e+06	20914804
	14	618.812	6220.81	3.84951e+06	74705679				14	465.565	4290.43	1.99747e+06	38764016					14	618.812	4643.88	2.87369e+06	55768336				14	465.565	2470.35	1.15011e+06	22319632
	15	434.493	6056.46	2.63149e+06	51068056				15	452.528	3541.62	1.60268e+06	31102485					15	434.493	4766.93	2.0712e+06	40194787				15	452.528	2144.86	970610	18836186
	16	530.388	5273.73	2.79712e+06	54282537				16	612.061	5832.01	3.56955e+06	69272666					16	530.388	4098.67	2.17389e+06	42187606				16	612.061	2794.4	1.71035e+06	33191917
	17	359.415	5065.39	1.82057e+06	35331075				17	379.872	3866.11	1.46863e+06	28500963					17	359.415	4491.44	1.61429e+06	31327758				17	379.872	2621.97	996012	19329156
	18	529.976	4530.5	2.40106e+06	46596199				18	289.284	1910.62	552711		10726215				18	529.976	3918.6	2.07676e+06	40302799				18	289.284	2216.11	641086	12441265
	19	342.977	6621.06	2.27087e+06	44069743				19	553.525	3505.1	1.94016e+06	37651755					19	342.977	5256.77	1.80295e+06	34989039				19	553.525	2423.78	1.34162e+06	26036263
	20	344.677	5790.19	1.99575e+06	38730614				20	730.733	3037.12	2.21932e+06	43069430					20	344.677	5044.31	1.73866e+06	33741384				20	730.733	2103.42	1.53704e+06	29828614
	21	331.435	5534.56	1.83435e+06	35598305				21	477.468	3427.14	1.63635e+06	31755892					21	331.435	5148.53	1.7064e+06	33115328				21	477.468	2644.45	1.26264e+06	24503433
	22	889.648	6986.46	6.21549e+06		120621178			22	539.199	5888.78	3.17523e+06	61620186					22	889.648	6425.68	5.7166e+06	110939433				22	539.199	2908.91	1.56848e+06	30438803
	23	557.183	5178.84	2.88556e+06	55998830				23	459.948	3029.44	1.39338e+06	27040777					23	557.183	2782.89	1.55058e+06	30091397				23	459.948	2453.67	1.12856e+06	21901478
	24	514.517	6028.05	3.10154e+06	60190102				24	675.081	3533.06	2.3851e+06	46286586					24	514.517	4526.49	2.32896e+06	45197027				24	675.081	2120.15	1.43127e+06	27776075
	25	392.909	6035.62	2.37145e+06	46021623				25	691.055	3744.76	2.58784e+06	50220990					25	392.909	5009.36	1.96822e+06	38196337				25	691.055	2129.72	1.47176e+06	28561709
	26	445.108	4564.5	2.03169e+06	39428174				26	430.731	5150.47	2218465	43052747					26	445.108	3585.15	1.59578e+06	30968530				26	430.731	3125.35	1.34618e+06	26124775
	27	384.612	6770.26	2.60393e+06	50533198				27	471.13	3690.84	1.73887e+06	33745368					27	384.612	4600.46	1.7694e+06	34337860				27	471.13	2456.06	1.15712e+06	22455777
	28	430.782	1676.15	722057	14012638				28	639.217	5235.8	3.34681e+06	64950098					28	430.782	7407.47	3.19101e+06	61926457				28	639.217	2630.14	1.68123e+06	32626856
	29	360.6	6985.08	2.51882e+06	48881563			image 3	1	717.696	3451.97	2.47747e+06	48079109					29	360.6	6376.95	2.29953e+06	44625873			image 3	1	717.696	1585.15	1.13765e+06	22077950
	30	262.231	7760.01	2.03492e+06	39490682				2	624.686	4209.48	2.62961e+06	51031566					30	262.231	5641.46	1.47937e+06	28709370				2	624.686	1603.36	1.0016e+06	19437512
	31	295.107	6724.95	1.98458e+06	38513780				3	434.956	3594.18	1.56331e+06	30338452					31	295.107	5570.03	1.64375e+06	31899557				3	434.956	1184.62	515258	9999386
image 4	1	431.401	6838.91	2.95031e+06	57255325				4	866.357	3305.12	2.86342e+06	55569038				image 4	1	431.401	3761.63	1.62277e+06	31492347				4	866.357	1205.97	1.0448e+06	20276045
	2	429.546	7028.97	3.01926e+06	58593462				5	796.484	3623.11	2.88574e+06	56002348					2	429.546	3566.31	1.5319e+06	29728795				5	796.484	1348.57	1.07411e+06	20844818
	3	442.48	6815.03	3.01551e+06	58520667				6	704.556	4304.51	3.03277e+06	58855555					3	442.48	3940.8	1.74372e+06	33839604				6	704.556	1367.78	963676	18701633
	4	501.789	5117.88	2.5681e+06	49837930				7	630.457	2315.91	1.46008e+06	28335204					4	501.789	3109.59	1.56036e+06	30281220				7	630.457	972.167	612910	11894459
	5	443.871	4354.96	1.93304e+06	37513627				8	577.486	2825.71	1.63181e+06	31667775					5	443.871	3194.99	1.41816e+06	27521630				8	577.486	1081.81	624729	12123834
	6	603.405	4500.57	2.71567e+06	52701689				9	659.726	3073.2	2.02747e+06	39346121					6	603.405	3348.1	2.02026e+06	39206301				9	659.726	1132.85	747368	14503832
	7	533.119	4898.36	2.61141e+06	50678413				10	537.241	2723.4	1.46312e+06	28394137					7	533.119	3134.14	1.67087e+06	32425796				10	537.241	1108.21	595379	11554252
	8	376.78	6261.06	2.35904e+06	45780884				11	658.489	1776.03	1.1695e+06	22695926					8	376.78	3420.44	1.28875e+06	25010257				11	658.489	939.079	618373	12000493
	9	380.954	4747.79	1.80869e+06	35100424				12	656.325	2732.57	1.79346e+06	34804784					9	380.954	3344.27	1.27401e+06	24724207				12	656.325	1019.84	669349	12989745
	10	522.04	7166.52	3.74121e+06	72604047				13	824.258	2744.96	2.26256e+06	43908395					10	522.04	3737.44	1.9511e+06	37864025				13	824.258	1186.2	977739	18974530
	11	410.686	4878.72	2.00362e+06	38883425				14	717.129	2866.14	2.0554e+06	39888144					11	410.686	3383.69	1.38963e+06	26968001				14	717.129	971.835	696931	13525024
	12	383.015	3883	1.48725e+06	28862314				15	731.3	3606	2.63707e+06	51176360					12	383.015	3274.63	1.25423e+06	24340330				15	731.3	1335.98	976999	18960175
	13	295.622	5883.22	1.73921e+06	33752037				16	853.011	3251.57	2.77362e+06	53826468					13	295.622	3860.92	1.14137e+06	22150113				16	853.011	1295.87	1.10539e+06	21451831
	14	269.239	3998.26	1.07649e+06	20890885				17	563.727	2766.21	1.55939e+06	30262373					14	269.239	3733.19	1.00512e+06	19505921				17	563.727	1054.15	594255	11532443
	15	528.584	4060.77	2.14646e+06	41655344				18	1105.91	3758.83	4.15695e+06	80672072					15	528.584	3311.16	1.75023e+06	33965838				18	1105.91	1555.95	1.72075e+06	33393775
	16	416.612	5404.57	2.25161e+06	43695963				19	644.525	2341.27	1.50901e+06	29284604					16	416.612	3973.53	1.65542e+06	32125961				19	644.525	1273.5	820800	15928893
	17	637.774	4803.32	3.06344e+06	59450728				20	683.532	3681.04	2.51611e+06	48828953					17	637.774	3486.64	2.22369e+06	43154176				20	683.532	1271.62	869194	16868063
	18	480.353	4928.96	2.36764e+06	45947769				21	605.62	3305.99	2.00218e+06	38855310					18	480.353	3151.37	1.51377e+06	29377095				21	605.62	1204.56	729508	14157238
	19	440.418	3536.14	1.55738e+06	30223383				22	721.251	3100.59	2.2363e+06	43398942					19	440.418	2357.34	1.03822e+06	20148192				22	721.251	1385.52	999307	19393103
	20	394.661	2976.39	1.17466e+06	22796183				23	709.348	3266.84	2.31733e+06	44971391					20	394.661	2161.57	853084	16555423				23	709.348	1489.4	1.05651e+06	20503137
	21	386.416	5622.79	2.17274e+06	42165314				24	572.23	2477.16	1.4175e+06	27508872					21	386.416	3108.74	1.20127e+06	23312445				24	572.23	1105.78	632760	12279681
	22	445.932	3698.83	1.64943e+06	32009646				25	751.499	4294.35	3.2272e+06	62628731					22	445.932	2857.87	1.27442e+06	24732019				25	751.499	1395.66	1.04884e+06	20354316
	23	312.266	3980.95	1.24312e+06	24124582				26	556.359	2760.09	1.5356e+06	29800677					23	312.266	3365.63	1.05097e+06	20395727				26	556.359	1301.76	724246	14055118
	24	399.453	3828.29	1.52922e+06	29676934													24	399.453	2772.35	1.10742e+06	21491285
	25	346.069	4898.16	1.6951e+06	32896074													25	346.069	3315.83	1.14751e+06	22269132
	26	317.419	3745.96	1.18904e+06	23075087													26	317.419	2902.26	921232	17877925
IF XAB2 Without RNAse			4.3994e+07	1.51575e+07	1.64406e+06		100	3.73701
IF XAB2 With RNAse			4.05815e+07	1.27361e+07	1.42394e+06		92.2432	3.23667
IF Rloops Without RNAse			3.41119e+07	1.38911e+07	1.49791e+06		100	3.40481
IF Rloops with RNAse			2.17208e+07	6.77682e+06	743853		63.6751	1.6908
	IF XAB2		IF Rloops
	without	with	without	with
variance	2.27046e+14	1.60181e+14	1.90718e+14	4.5372e+13
t.test		0.120516		9.51806e-12

## Sheet: IF AQR-Rloops
IF AQR																	IF Rloops
Without RNAseH					4.37031e+07	1.54357e+07	1.62707e+06	With RNAse					3.99306e+07	1.375e+07	1.4914e+06		Without RNAseH					3.2741e+07	1.13716e+07	1.19867e+06	With RNAse					2.22768e+07	6.97597e+06	756651
		area	mean	intden	rawintden					area	mea,	intden	rawintden						area	mea,	intden	rawintden					area	mea,	intden	rawintden
image 1	1	581.041	3339.61	1.94045e+06	37657401			image 1	1	692.395	4430.49	3.06765e+06	59532456				image 1	1	581.041	3072.01	1.78497e+06	34640039			image 1	1	692.395	3226.18	2.23379e+06	43350196
	2	520.597	3724.5	1.93896e+06	37628589				2	430.989	4995.51	2.15301e+06	41782456					2	520.597	2301.01	1.1979e+06	23247132				2	430.989	2559.93	1.1033e+06	21411267
	3	537.808	3608.78	1.94083e+06	37664802				3	431.761	4190.3	1.80921e+06	35110481					3	537.808	2514.64	1.35239e+06	26245304				3	431.761	2616.01	1.12949e+06	21919523
	4	529.976	3621.73	1.91943e+06	37249538				4	395.176	2659.01	1.05078e+06	20391984					4	529.976	1850.42	980678	19031568				4	395.176	2578.55	1.01898e+06	19774884
	5	532.707	6658.75	3.54716e+06	68838142				5	497.77	4035.45	2.00873e+06	38982470					5	532.707	3157.05	1.68178e+06	32637560				5	497.77	2975.41	1.48107e+06	28742470
	6	659.674	5694.7	3.75665e+06	72903543				6	611.443	2541.3	1.55386e+06	30155095					6	659.674	4462.53	2.94382e+06	57129289				6	611.443	2178.72	1.33216e+06	25852655
	7	495.245	4268.06	2.11374e+06	41020303				7	573.672	6076.4	3.48586e+06	67648560					7	495.245	2435.6	1.20622e+06	23408551				7	573.672	2846.31	1.63285e+06	31687982
	8	400.38	4650.91	1.86213e+06	36137549				8	523.792	4209.52	2.20492e+06	42789799					8	400.38	2444.09	978564	18990544				8	523.792	2434.98	1.27543e+06	24751606
	9	703.577	2857.62	2.01056e+06	39017978				9	438.821	4261.76	1.87015e+06	36293119					9	703.577	1565.41	1.10139e+06	21374130				9	438.821	2550.92	1.1194e+06	21723624
	10	461.751	2972.45	1.37253e+06	26636098				10	416.148	4675.29	1.94561e+06	37757658					10	461.751	2243.43	1.03591e+06	20103408				10	416.148	2438.55	1.0148e+06	19693744
	11	400.999	3736.69	1.49841e+06	29078895				11	658.592	4663.03	3.07104e+06	59598232					11	400.999	2408.81	965930	18745376				11	658.592	2413.9	1.58977e+06	30852031
	12	477.622	3323.93	1.58758e+06	30809481				12	408.367	2710.25	1.10678e+06	21478744					12	477.622	1881.31	898554	17437832				12	408.367	1980.13	808620	15692522
	13	504.623	3246.62	1.63832e+06	31794109				13	571.972	4111.97	2.35193e+06	45642834					13	504.623	1623.55	819282	15899433				13	571.972	2312.84	1.32288e+06	25672562
	14	726.353	5180.69	3.76301e+06	73027070				14	492.308	2955.02	1.45478e+06	28232269					14	726.353	3179.43	2.30939e+06	44817238				14	492.308	2550.78	1.25577e+06	24370103
	15	391.466	4382.65	1.71566e+06	33295019				15	554.607	5739.22	3.18301e+06	61771209					15	391.466	2960.73	1.15903e+06	22492680				15	554.607	3131.44	1.73672e+06	33703691
	16	465.565	4277.1	1.99127e+06	38643641				16	642.824	1570.27	1.00941e+06	19589107					16	465.565	3227.91	1.5028e+06	29164140				16	642.824	1703.79	1.09524e+06	21254757
	17	486.743	3829.34	1.86391e+06	36171969				17	431.71	3511.83	1.51609e+06	29422124					17	486.743	2908.62	1.41575e+06	27474825				17	431.71	1950.05	841855	16337496
	18	475.716	4028.49	1.91642e+06	37191017				18	810.757	3778.85	3.06373e+06	59456394					18	475.716	2848.64	1.35514e+06	26298614				18	810.757	2637.07	2.13803e+06	41491696
	19	653.027	5134.89	3.35322e+06	65074517				19	568.777	4342.38	2.46984e+06	47931153					19	653.027	3798.02	2.48021e+06	48132268				19	568.777	3092.76	1.75909e+06	34137904
image 2	1	1407.46	3409.59	4.79888e+06	93129673				20	491.432	5587.73	2.74599e+06	53290164				image 2	1	1407.46	2429.73	3.41976e+06	66365715				20	491.432	3509.81	1.72483e+06	33473064
	2	1010.79	2131.69	2.15469e+06	41815169				21	512.198	3669.03	1.87927e+06	36470159					2	1010.79	1849.92	1.86988e+06	36287994				21	512.198	2192.55	1.12302e+06	21793928
	3	741.708	2520.78	1.86969e+06	36284142				22	488.65	3920.91	1.91595e+06	37182024					3	741.708	1543.28	1.14466e+06	22213994				22	488.65	1985.37	970152	18827299
	4	666.373	2094.96	1.39602e+06	27091993				23	529.254	2891.75	1.53047e+06	29701159					4	666.373	1490.41	993170	19273993				23	529.254	2021.95	1.07013e+06	20767440
	5	657.562	4116.57	2.7069e+06	52531607				24	558.214	3037.8	1.69574e+06	32908450					5	657.562	2394.69	1.57466e+06	30558663				24	558.214	1665.53	929723	18042707
	6	1000.33	2277.76	2.27852e+06	44218245				25	381.933	4148.14	1.58431e+06	30746005					6	1000.33	1909.4	1.91003e+06	37067171				25	381.933	2059.5	786590	15265001
	7	973.744	3816	3.7158e+06	72110913				26	462.679	3690.68	1.7076e+06	33138637					7	973.744	1973.06	1.92126e+06	37284961				26	462.679	2110.65	976553	18951523
	8	752.787	3367.96	2.53536e+06	49202577				27	451.188	4270.67	1.92688e+06	37393994					8	752.787	2141.46	1.61206e+06	31284606				27	451.188	2451.81	1.10623e+06	21468023
	9	752.942	2724.52	2.0514e+06	39810645				28	461.545	4911.64	2.26695e+06	43993595					9	752.942	2098.9	1.58035e+06	30669172				28	461.545	2205.36	1.01788e+06	19753442
	10	908.972	2100.07	1.9089e+06	37045148				29	445.52	3041.57	1.35508e+06	26297436					10	908.972	1636.08	1.48715e+06	28860473				29	445.52	1709.97	761824	14784382
	11	668.434	3239.47	2.16537e+06	42022349			image 2	1	549.299	565.665	310719	6029990					11	668.434	2577.75	1.72305e+06	33438549			image 2	1	549.299	1900.38	1.04388e+06	20258011
	12	683.944	3369.59	2.30461e+06	44724528				2	461.7	3124.8	1.44272e+06	27998194					12	683.944	2462.01	1.68388e+06	32678279				2	461.7	2158.3	996486	19338348
image 3	1	464.328	6409.15	2.97595e+06	57752873				3	528.378	3748.29	1.98051e+06	38434926				image 3	1	464.328	4739.07	2.20048e+06	42703791				3	528.378	2286.47	1.20812e+06	23445485
	2	413.623	6427.18	2.65843e+06	51590940				4	497.512	3022.01	1.50349e+06	29177528					2	413.623	4510.27	1.86555e+06	36203929				4	497.512	2161.05	1.07515e+06	20864930
	3	547.393	4932.52	2.70003e+06	52398193				5	488.701	3476.43	1.69893e+06	32970417					3	547.393	4185.48	2.2911e+06	44462377				5	488.701	2313.74	1.13073e+06	21943546
	4	388.838	6071.08	2.36067e+06	45812365				6	709.194	3427.23	2.43057e+06	47168981					4	388.838	5047.45	1.96264e+06	38088062				6	709.194	2097.02	1.48719e+06	28861237
	5	439.182	4597.53	2.01915e+06	39184728				7	605.93	2752.32	1667713	32364552					5	439.182	3616.22	1.58818e+06	30821025				7	605.93	2140.58	1.29704e+06	25171050
	6	499.368	4036.11	2.0155e+06	39113992				8	775.563	2944.71	2.28381e+06	44320778					6	499.368	3964.97	1.97998e+06	38424510				8	775.563	2078.16	1.61174e+06	31278378
	7	407.388	7046.64	2.87072e+06	55710752				9	512.765	3288.13	1.68604e+06	32720223					7	407.388	5403.99	2.20152e+06	42723932				9	512.765	2568.34	1.31696e+06	25557581
	8	361.991	5266.35	1.90637e+06	36996103				10	607.475	5386.85	3.27238e+06	63505624					8	361.991	4699.86	1.70131e+06	33016492				10	607.475	2718.59	1.65148e+06	32049473
	9	370.184	6452.83	2.38874e+06	46357148				11	521.37	3444.58	1.7959e+06	34852290					9	370.184	4929.66	1.82488e+06	35414659				11	521.37	2347.82	1.22408e+06	23755192
	10	405.533	5057.08	2.05082e+06	39799253				12	497.925	4638.79	2.30977e+06	44824640					10	405.533	3906.09	1.58405e+06	30740892				12	497.925	2895.61	1.4418e+06	27980273
	11	794.938	6129.19	4.87233e+06	94555058				13	678.276	5040.65	3.41896e+06	66350133					11	794.938	5243.4	4.16818e+06	80889992				13	678.276	2580.62	1.75038e+06	33968767
	12	417.746	6482.51	2.70804e+06	52553671				14	664.106	5498.02	3.65127e+06	70858518					12	417.746	3921.67	1.63826e+06	31792952				14	664.106	2689.54	1.78614e+06	34662755
	13	401.875	5445.45	2.18839e+06	42469089				15	413.623	3662.05	1.51471e+06	29395308					13	401.875	3962.41	1.59239e+06	30902820				15	413.623	2522.53	1.04338e+06	20248337
	14	346.326	6175.61	2.13878e+06	41506250				16	325.612	1787.62	582071	11295987					14	346.326	4832.43	1.6736e+06	32478764				16	325.612	2126.45	692397	13437036
	15	314.791	6997.82	2.20285e+06	42749696				17	660.19	3253	2.1476e+06	41677432					15	314.791	5491.87	1.72879e+06	33549827				17	660.19	2668.61	1.76179e+06	34190250
	16	285.831	6120.87	1.74954e+06	33952449				18	596.448	3371.14	2.01071e+06	39020985					16	285.831	5475.01	1.56493e+06	30369898				18	596.448	2365.62	1.41097e+06	27382106
	17	301.548	6335.41	1.91043e+06	37074837				19	488.289	3384.16	1.65245e+06	32068344					17	301.548	5306.32	1.60011e+06	31052578				19	488.289	2088.57	1.01983e+06	19791292
	18	465.822	4932.78	2.2978e+06	44592345				20	440.418	3420.36	1.50639e+06	29233820					18	465.822	4115.23	1.91696e+06	37201670				20	440.418	2540.57	1.11891e+06	21714250
	19	314.069	5542.28	1.74066e+06	33780227				21	528.739	3558.86	1.88171e+06	36517439					19	314.069	4746.28	1.49066e+06	28928552				21	528.739	2073.48	1.09633e+06	21275940
	20	466.234	5798.71	2.70356e+06	52466724				22	576.97	3931.54	2.26838e+06	44021474					20	466.234	4371.28	2.03804e+06	39551370				22	576.97	2284.74	1.31823e+06	25582211
	21	548.99	6784.71	3.72474e+06	72284277				23	491.174	4140.75	2.03383e+06	39469624					21	548.99	4927.37	2.70508e+06	52496227				23	491.174	2427.54	1.19235e+06	23139346
	22	393.682	6389.58	2.51546e+06	48816405				24	692.55	3079.22	2.13252e+06	41384789					22	393.682	7080.63	2.78751e+06	54096024				24	692.55	2007.52	1.39031e+06	26981029
	23	448.354	1477.08	662254	12852064				25	569.344	711.899	405315	7865772					23	448.354	5349.4	2.39842e+06	46545082				25	569.344	2344.17	1.33464e+06	25900693
	24	354.571	1582.39	561071	10888446				26	472.469	3493.93	1.65078e+06	32035868					24	354.571	5055.95	1.79269e+06	34789979				26	472.469	2344.48	1.10769e+06	21496534
	25	377.038	3344.9	1.26115e+06	24474652				27	747.119	3552.37	2.65404e+06	51505770					25	377.038	3323.6	1.25312e+06	24318786				27	747.119	2082.01	1.55551e+06	30187083
	26	396.258	6462.48	2.56081e+06	49696461				28	536.211	4035.14	2.16368e+06	41989614					26	396.258	5001.08	1.98172e+06	38458337				28	536.211	2205.01	1.18235e+06	22945368
	27	503.078	5593.92	2.81417e+06	54613407				29	498.337	4499.57	2.2423e+06	43515316					27	503.078	2931.02	1.47453e+06	28615578				29	498.337	2905.24	1.44779e+06	28096525
	28	463.967	4292.12	1.9914e+06	38646245			image 3	1	863.471	3315.81	2.8631e+06	55562956					28	463.967	2734.75	1.26884e+06	24623713			image 3	1	863.471	1212.53	1.04698e+06	20318302
	29	395.485	6668.49	2.63729e+06	51180691				2	793.186	3636.43	2.88437e+06	55975641					29	395.485	6259.62	2.47559e+06	48042569				2	793.186	1355.8	1.0754e+06	20869896
	30	471.027	1628.18	766915	14883163				3	432.586	3611.22	1.56216e+06	30316191					30	471.027	7163.4	3.37415e+06	65480650				3	432.586	1192.68	515938	10012566
	31	497.564	6706.13	3.33673e+06	64754348				4	625.665	2328.76	1.45703e+06	28275850					31	497.564	4500.6	2.23934e+06	43457826				4	625.665	978.824	612416	11884884
	32	561.975	3097.32	1.74062e+06	33779335				5	560.945	2777.47	1.55801e+06	30235523					32	561.975	2803.75	1.57564e+06	30577687				5	560.945	1060.16	594692	11540911
image 4	1	461.906	6505.14	3.00476e+06	58312086				6	699.042	4332.78	3.02879e+06	58778447				image 4	1	461.906	3679.27	1.69948e+06	32980986				6	699.042	1378.9	963909	18706154
	2	410.325	3726.2	1.52895e+06	29671711				7	646.689	3499.07	2.26281e+06	43913308					2	410.325	3248.72	1.33303e+06	25869543				7	646.689	1580.59	1.02215e+06	19836424
	3	471.696	6565.61	3.09698e+06	60101610				8	641.948	2350.31	1.50878e+06	29280171					3	471.696	3442.17	1.62366e+06	31509626				8	641.948	1280.35	821919	15950610
	4	492.05	6295.33	3.09762e+06	60114114				9	1101.69	3772.08	4.15566e+06	80647069					4	492.05	3763.94	1.85205e+06	35941903				9	1101.69	1563.41	1.72239e+06	33425630
	5	525.235	4963.88	2.6072e+06	50596798				10	689.973	3202.18	2.20942e+06	42877139					5	525.235	3092.95	1.62453e+06	31526481				10	689.973	1429.57	986366	19141966
	6	637.723	4339.42	2.76735e+06	53704642				11	579.907	2696.14	1.56351e+06	30342317					6	637.723	3306.59	2.10869e+06	40922355				11	579.907	1276.01	739965	14360169
	7	468.914	4198.58	1.96877e+06	38207040				12	727.693	3622.13	2.6358e+06	51151692					7	468.914	3166.84	1.48498e+06	28818263				12	727.693	1343.52	977666	18973116
	8	563.263	4726.09	2.66203e+06	51660867				13	714.707	2875.88	2.05542e+06	39888510					8	563.263	3110.28	1.75191e+06	33998512				13	714.707	977.814	698851	13562276
	9	553.37	6873.15	3.8034e+06	73810770				14	772.265	4219.37	3.25847e+06	63235659					9	553.37	3668.41	2.02999e+06	39395107				14	772.265	1379.3	1.06518e+06	20671561
	10	409.759	4530.89	1.85657e+06	36029663				15	632.261	2382.26	1.50621e+06	29230369					10	409.759	3284.9	1.34602e+06	26121511				15	632.261	1076.05	680343	13203109
	11	546.31	3660.88	1.99998e+06	38812673				16	653.439	1787.13	1.16778e+06	22662608					11	546.31	2907.41	1.58835e+06	30824306				16	653.439	945.7	617957	11992416
	12	406.049	5957.16	2.41889e+06	46942388				17	534.047	2735.48	1.46087e+06	28350478					12	406.049	3367.47	1.36736e+06	26535664				17	534.047	1115.45	595701	11560492
	13	440.573	4654.15	2.05049e+06	39793020				18	653.594	2743.41	1.79308e+06	34797419					13	440.573	3327.61	1.46606e+06	28451104				18	653.594	1026.59	670975	13021314
	14	318.604	5587.5	1.7802e+06	34547512				19	657.252	3083.42	2.02659e+06	39329059					14	318.604	3780.36	1.20444e+06	23373952				19	657.252	1139.07	748655	14528808
	15	446.087	5153.86	2.29907e+06	44616962				20	820.908	2755.91	2.26235e+06	43904419					15	446.087	3893.27	1.73673e+06	33704023				20	820.908	1192.99	979339	19005584
	16	423.105	3689.14	1.56089e+06	30291517				21	574.754	2837.08	1.63062e+06	31644762					16	423.105	2756.27	1.16619e+06	22631719				21	574.754	1088.66	625713	12142932
	17	337.412	3785.37	1.27723e+06	24786626				22	717.696	3454.97	2.47962e+06	48120893					17	337.412	3299.11	1.11316e+06	21602599				22	717.696	1589.15	1.14053e+06	22133662
	18	673.433	4628.52	3.117e+06	60490159				23	624.686	4212.48	2.63148e+06	51067935					18	673.433	3452.72	2.32518e+06	45123654				23	624.686	1607.36	1.00409e+06	19486004
	19	507.355	4745.65	2.40773e+06	46725722				24	557.441	4177.49	2.3287e+06	45192099					19	507.355	3132.44	1.58926e+06	30841975				24	557.441	1607.7	896197	17392099
	20	478.498	3375.02	1.61494e+06	31340433				25	824.309	3334.24	2.74844e+06	53337768					20	478.498	2365.13	1.13171e+06	21962629				25	824.309	1325.34	1.09249e+06	21201481
	21	472.469	3560.93	1.68243e+06	32650208				26	701.516	3622.52	2.54125e+06	49316957					21	472.469	2832.87	1.33845e+06	25974624				26	701.516	1257.56	882198	17120419
	22	434.389	2815.36	1.22296e+06	23733504				27	625.82	3244.22	2.0303e+06	39401085					22	434.389	2131.88	926066	17971751				27	625.82	1188.3	743659	14431856
	23	428.412	5267.24	2.25655e+06	43791878													23	428.412	2999.47	1.28501e+06	24937630
	24	502.15	4185.3	2.10165e+06	40785734													24	502.15	3437.78	1.72628e+06	33501179
	25	254.141	4143.89	1.05313e+06	20437639													25	254.141	3890.66	988775	19188709
	26	300.002	3867.62	1.16029e+06	22517314													26	300.002	3020.99	906303	17588210
	27	313.76	5205.68	1.63334e+06	31697405													27	313.76	3500.74	1.09839e+06	21316027
IF AQR Without RNAse			4.37031e+07	1.54357e+07	1.62707e+06		100	3.72301
IF AQR With RNAse			3.99306e+07	1.375e+07	1.4914e+06		91.3677	3.41256
IF Rloops Without RNAse			3.2741e+07	1.13716e+07	1.19867e+06		100	2.74276
IF Rloops with RNAse			2.22768e+07	6.97597e+06	756651		68.0394	1.73134
	IF AQR		IF Rloops
	without	with	without	with
variance	2.35615e+14	1.86838e+14	1.27877e+14	4.80917e+13
t.test		0.090254		1.08158e-11
