# Supplementary material for: XAB2 dynamics during DNA damage-dependent transcription inhibition
Source: eLife. 2022 Jul 26;11:e77094. doi: 10.7554/eLife.77094 (PMC9436415; doi:10.7554/eLife.77094)
Supplement: Figure 5—figure supplement 5—source data 1. [file elife-77094-fig5-figsupp5-data1.xlsx]

## Sheet: IF EU-ARN
		noUV							1h							2h							4h							16h							NoEU
		Area	Mean	IntDen	RawIntDen				Area	Mean	IntDen	RawIntDen				Area	Mean	IntDen	RawIntDen				Area	Mean	IntDen	RawIntDen				Area	Mean	IntDen	RawIntDen				Area	Mean	IntDen	RawIntDen
	1	16202	519.602	8418590	8418590			1	14854	226.203	3360012	3360012			1	16933	460.471	7797162	7797162			1	13907	426.964	5937792	5937792			1	11751	586.607	6893223	6893223			1	14073	147.379	2074067	2074067
	2	18395	634.571	11672937	11672937			2	16592	217.851	3614589	3614589			2	18300	389.931	7135744	7135744			2	13128	456.715	5995758	5995758			2	10322	341.354	3523458	3523458			2	13620	131.669	1793337	1793337
	3	16126	532.337	8584460	8584460			3	15696	146.317	2296589	2296589			3	13663	644.336	8803566	8803566			3	14403	558.684	8046723	8046723			3	19862	994.556	19753881	19753881			3	9149	578.68	5294341	5294341
	4	16343	408.476	6675724	6675724			4	12080	160.551	1939460	1939460			4	15839	420.752	6664292	6664292			4	9183	558.368	5127497	5127497			4	17054	953.211	16256068	16256068			4	9056	451.018	4084417	4084417
	5	17705	606.562	10739179	10739179			5	17606	215.759	3798645	3798645			5	16979	573.381	9735443	9735443			5	15868	658.265	10445353	10445353			5	17122	817.75	14001509	14001509			5	15824	271.935	4303099	4303099
	6	12858	460.79	5924834	5924834			6	15434	204.202	3151647	3151647			6	12679	443.332	5621007	5621007			6	7828	786.11	6153668	6153668			6	13980	291.59	4076426	4076426			6	12833	178.526	2291026	2291026
	7	15768	591.647	9329092	9329092			7	13060	237.567	3102625	3102625			7	18513	891.154	16497926	16497926			7	11006	498.071	5481774	5481774			7	13030	753.93	9823711	9823711			7	10018	323.205	3237870	3237870
	8	15969	719.439	11488719	11488719			8	12268	206.719	2536031	2536031			8	13971	385.402	5384455	5384455			8	15998	722.38	11556631	11556631			8	18584	1028.45	19112667	19112667			8	15516	180.02	2793194	2793194
	9	15640	667.905	10446027	10446027			9	12974	252.382	3274398	3274398			9	13355	307.135	4101794	4101794			9	14044	583.014	8187844	8187844			9	17277	529.778	9152975	9152975			9	8136	254.098	2067340	2067340
	10	8886	766.385	6810099	6810099			10	12129	579.545	7029296	7029296			10	18826	318.678	5999433	5999433			10	16127	556.19	8969675	8969675			10	14063	785.222	11042581	11042581			10	9257	234.259	2168536	2168536
	11	20140	585.831	11798637	11798637			11	12114	265.902	3221137	3221137			11	16980	339.545	5765479	5765479			11	8638	734.436	6344059	6344059			11	14700	832.117	12232121	12232121			11	15703	233.759	3670719	3670719
	12	17658	490.389	8659281	8659281			12	9950	396.58	3945975	3945975			12	15184	309.32	4696720	4696720			12	15223	523.377	7967370	7967370			12	15512	970.358	15052199	15052199			12	14829	300.014	4448901	4448901
	13	18607	439.218	8172535	8172535			13	14362	270.804	3889290	3889290			13	13307	614.496	8177094	8177094			13	21840	448.154	9787673	9787673			13	14038	357.729	5021795	5021795			13	11464	247.302	2835067	2835067
	1	15527	516.862	8025309	8025309			14	11731	338.701	3973306	3973306			14	19002	693.802	13183626	13183626			14	15674	557.438	8737281	8737281			14	14220	772.96	10991494	10991494			14	13735	204.046	2802570	2802570
	2	18373	511.269	9393548	9393548			15	13422	192.074	2578012	2578012			15	14395	324.484	4670941	4670941			15	10722	779.715	8360105	8360105			15	12052	889.59	10721343	10721343			15	11489	209.813	2410545	2410545
	3	19000	624.78	11870829	11870829			16	14457	201.269	2909744	2909744			16	15657	431.097	6749683	6749683			16	14486	420.818	6095976	6095976			16	15095	281.01	4241853	4241853			16	18964	336.394	6379368	6379368
	4	19589	676.756	13256975	13256975			17	12967	231.875	3006728	3006728			17	13474	337.849	4552178	4552178			17	9478	442.175	4190934	4190934			17	12009	861.133	10341342	10341342			17	11335	218.669	2478608	2478608
	5	12984	1116.89	14501648	14501648			18	12926	253.212	3273016	3273016			1	9757	503.089	4908636	4908636			18	17165	345.058	5922927	5922927			18	16714	849.527	14198987	14198987			18	10030	189.535	1901041	1901041
	6	16713	990.229	16549690	16549690			19	13760	182.609	2512697	2512697			2	9085	476.962	4333196	4333196			19	10423	425.688	4436944	4436944			19	10569	687.535	7266562	7266562			19	14885	262.374	3905432	3905432
	7	15433	1095.44	16905870	16905870			20	21663	230.64	4996349	4996349			3	10794	691.149	7460264	7460264			20	12397	725.389	8992644	8992644			20	8463	850.388	7196831	7196831			20	9856	253.226	2495794	2495794
	8	16243	717.219	11649790	11649790			21	16814	218.489	3673681	3673681			4	8273	672.739	5565567	5565567			1	12557	306.201	3844960	3844960			21	14206	798.359	11341483	11341483			21	13012	211.864	2756774	2756774
	9	13747	822.698	11309624	11309624			22	12817	246.114	3154449	3154449			5	10857	566.075	6145871	6145871			2	12829	440.292	5648508	5648508			22	8432	659.715	5562717	5562717			22	16543	247.513	4094606	4094606
	10	12886	855.945	11029704	11029704			1	18779	336.75	6323835	6323835			6	17136	633.101	10848813	10848813			3	12252	302.773	3709571	3709571			23	16237	569.473	9246530	9246530			23	10196	265.141	2703382	2703382
	11	12873	864.473	11128361	11128361			2	12507	270.156	3378847	3378847			7	14179	587.04	8323634	8323634			4	13641	460.522	6281986	6281986			24	14890	928.437	13824421	13824421			24	13391	279.501	3742795	3742795
	12	18409	1011.39	18618610	18618610			3	11502	377.895	4346552	4346552			8	18412	938.763	17284510	17284510			5	12674	389.315	4934178	4934178			25	11005	830.752	9142424	9142424			25	12321	265.196	3267478	3267478
	13	11416	1063.45	12140379	12140379			4	21225	473.813	10056689	10056689			9	11532	560.653	6465445	6465445			6	11396	522.324	5952401	5952401			26	13187	824.801	10876656	10876656			1	15760	194.291	3062023	3062023
	14	20333	827.349	16822491	16822491			5	14703	519.826	7643007	7643007			10	14312	542.079	7758237	7758237			7	12635	603.385	7623768	7623768			27	16155	921.185	14881736	14881736			2	19103	195.113	3727250	3727250
	15	21975	527.632	11594705	11594705			6	22606	465.468	10522361	10522361			11	13521	535.871	7245518	7245518			8	12455	423.587	5275771	5275771			28	16439	876.209	14404000	14404000			3	17990	160.859	2893848	2893848
	16	12897	941.467	12142104	12142104			7	17521	655.184	11479474	11479474			12	23589	657.808	15517022	15517022			9	17607	663.734	11686368	11686368			29	13772	807.583	11122032	11122032			4	14970	205.18	3071549	3071549
	17	18018	508.585	9163683	9163683			8	14147	464.153	6566372	6566372			13	13193	501.631	6618024	6618024			10	24974	424.486	10601122	10601122			1	20020	513.376	10277791	10277791			5	13934	197.852	2756868	2756868
	18	19899	1022	20336677	20336677			9	19396	391.848	7600279	7600279			14	11840	550.395	6516674	6516674			11	12405	439.81	5455841	5455841			2	10580	739.528	7824208	7824208			6	13801	252.256	3481384	3481384
	19	13686	889.118	12168463	12168463			10	17692	348.952	6173664	6173664			15	10324	539.42	5568968	5568968			12	13113	426.614	5594195	5594195			3	10223	1136.41	11617552	11617552			7	14671	233.527	3426074	3426074
	20	12221	1304.05	15936814	15936814			11	14432	860.859	12423919	12423919			16	10781	570.463	6150164	6150164			13	12756	545.653	6960356	6960356			4	10878	680.294	7400238	7400238			8	17116	363.758	6226077	6226077
	21	16974	1273.68	21619394	21619394			12	9925	472.946	4693990	4693990			17	9667	501.195	4845051	4845051			14	16028	369.631	5924453	5924453			5	13843	799.715	11070449	11070449			9	10507	323.421	3398181	3398181
	22	15371	1259.71	19363012	19363012			13	9653	581.232	5610628	5610628			18	16162	480.216	7761248	7761248			15	24167	240.888	5821550	5821550			6	14566	1268.73	18480269	18480269			10	14126	203.281	2871547	2871547
	1	20213	699.67	14142439	14142439			14	15820	348.561	5514233	5514233			19	10936	403.644	4414246	4414246			16	12146	215.04	2611877	2611877			7	17334	453.65	7863561	7863561			11	20690	286.308	5923705	5923705
	2	16019	649.214	10399758	10399758			15	14306	233.046	3333963	3333963			20	11559	507.889	5870692	5870692			17	12082	260.965	3152981	3152981			8	17090	625.534	10690373	10690373			12	12870	257.889	3319034	3319034
	3	13972	532.775	7443936	7443936			16	9810	206.746	2028176	2028176			1	12464	389.17	4850619	4850619			18	12206	214.455	2617641	2617641			9	16580	392.811	6512813	6512813			13	10643	269.195	2865047	2865047
	4	14720	531.197	7819221	7819221			17	17779	424.755	7551718	7551718			2	14126	441.024	6229903	6229903			19	11235	300.698	3378338	3378338			10	13287	780.51	10370640	10370640			14	18017	289.107	5208839	5208839
	5	16675	883.798	14737337	14737337			18	11473	392.672	4505130	4505130			3	12833	489.767	6285180	6285180			20	11110	386.007	4288536	4288536			11	15692	313.341	4916949	4916949			15	12725	242.193	3081905	3081905
	6	15314	712.151	10905887	10905887			19	16642	481.154	8007367	8007367			4	10983	443.466	4870584	4870584			21	20122	433.021	8713245	8713245			12	15542	384.699	5978992	5978992			16	18400	553.948	10192648	10192648
	7	13935	562.903	7844058	7844058			20	13778	338.579	4664939	4664939			5	15205	564.154	8577958	8577958			22	13208	450.253	5946942	5946942			13	15736	420.54	6617625	6617625			17	13849	289.214	4005318	4005318
	8	22427	461.024	10339386	10339386			21	15208	499.252	7592631	7592631			6	12051	535.673	6455391	6455391			23	10904	485.405	5292858	5292858			14	14613	897.025	13108222	13108222			18	15169	132.033	2002812	2002812
	9	19858	497.641	9882147	9882147			22	20059	546.705	10966347	10966347			7	7765	781.751	6070296	6070296			24	17931	493.245	8844370	8844370			15	20808	811.699	16889834	16889834			19	13181	190.313	2508515	2508515
	10	16995	773.817	13151018	13151018			23	16195	858.38	13901466	13901466			8	12031	500.684	6023733	6023733			25	13775	460.383	6341775	6341775			1	9555	328.261	3136537	3136537			20	12584	288.212	3626866	3626866
	11	15547	712.109	11071151	11071151			24	18560	807.505	14987294	14987294			9	16660	628.394	10469036	10469036			1	9217	411.495	3792751	3792751			2	9364	650.785	6093951	6093951			21	9994	361.759	3615420	3615420
	12	17484	794.845	13897070	13897070			25	13909	616.473	8574524	8574524			10	13144	604.03	7939367	7939367			2	11977	544.348	6519659	6519659			3	17596	600.348	10563725	10563725			22	16899	330.567	5586258	5586258
	13	14909	699.53	10429292	10429292			1	13149	380.978	5009482	5009482			11	16140	408.922	6600001	6600001			3	9548	481.472	4597097	4597097			4	15124	741.425	11213315	11213315			23	20736	225.698	4680067	4680067
	14	14725	986.201	14521806	14521806			2	13181	341.628	4503001	4503001			12	12137	514.015	6238599	6238599			4	11106	405.027	4498230	4498230			5	9906	746.402	7393854	7393854			24	15707	391.309	6146295	6146295
	15	17180	763.977	13125123	13125123			3	19361	369.678	7157332	7157332			13	9716	467.069	4538043	4538043			5	8964	476.055	4267356	4267356			6	11299	898.362	10150589	10150589			25	10222	308.512	3153605	3153605
	16	15195	707.964	10757517	10757517			4	19910	400.223	7968433	7968433			14	10372	317.038	3288318	3288318			6	17758	382.302	6788915	6788915			7	12421	440.221	5467981	5467981			26	9306	345.684	3216938	3216938
	17	17007	558.582	9499806	9499806			5	17096	397.016	6787378	6787378			15	8560	772.825	6615378	6615378			7	16353	543.819	8893080	8893080			8	12745	866.166	11039290	11039290			27	11302	279.519	3159129	3159129
	1	9652	719.682	6946374	6946374			6	9262	508.476	4709507	4709507			16	11565	616.86	7133991	7133991			8	17530	582.802	10216518	10216518			9	14583	555.837	8105776	8105776			1	7878	125.874	991637	991637
	2	14975	532.752	7977956	7977956			7	10611	339.126	3598465	3598465			17	8075	632.136	5104499	5104499			9	12879	288.812	3719612	3719612			10	11945	1031.41	12320160	12320160			2	7673	149.27	1145347	1145347
	3	22247	659.723	14676848	14676848			8	16607	501.948	8335844	8335844			18	13788	439.139	6054853	6054853			10	10878	328.212	3570289	3570289			11	10315	841.247	8677458	8677458			3	10336	123.723	1278806	1278806
	4	18617	676.17	12588255	12588255			9	16883	469.374	7924446	7924446			19	11031	477.104	5262937	5262937			11	17748	366.92	6512103	6512103			12	14305	316.396	4526049	4526049			4	17649	134.643	2376311	2376311
	5	21998	520.348	11446620	11446620			10	16734	360.198	6027545	6027545			20	15037	371.345	5583914	5583914			12	18447	644.736	11893450	11893450			13	15167	668.361	10137035	10137035			5	14011	270.674	3792412	3792412
	6	14036	606.97	8519436	8519436			11	13095	356.432	4667473	4667473			21	8695	439.052	3817554	3817554			13	12581	414.638	5216558	5216558			14	9783	1767.18	17288359	17288359			6	18584	179.084	3328093	3328093
	7	11638	590.611	6873525	6873525			12	15767	472.027	7442456	7442456			1	13334	529.391	7058897	7058897			14	13983	416.012	5817097	5817097			15	15260	404.104	6166627	6166627			7	18923	234.001	4427999	4427999
	8	11893	487.482	5797626	5797626			13	16102	427.653	6886065	6886065			2	13224	290.713	3844385	3844385			15	21849	320.605	7004904	7004904			16	8790	357.291	3140590	3140590			8	13316	262.443	3494693	3494693
	9	18517	530.529	9823804	9823804			14	17618	310.557	5471392	5471392			3	16694	533.181	8900916	8900916			16	12113	387.91	4698759	4698759			17	10795	632.063	6823116	6823116			9	9949	231.733	2305512	2305512
	10	20577	873.755	17979266	17979266			15	11963	294.323	3520988	3520988			4	18017	409.144	7371541	7371541			17	15565	421.144	6555110	6555110			18	11399	664.328	7572673	7572673			10	18601	220.676	4104787	4104787
	11	18201	736.956	13413339	13413339			16	13356	377.732	5044985	5044985			5	12593	687.282	8654942	8654942			18	18795	286.624	5387096	5387096			19	11061	327.358	3620908	3620908			11	13033	244.504	3186621	3186621
	12	20386	507.08	10337336	10337336			17	13463	449.323	6049238	6049238			6	12227	466.019	5698014	5698014			19	14754	554.123	8175529	8175529			20	16085	581.2	9348596	9348596			12	11651	686.281	7995859	7995859
	13	14200	490.67	6967509	6967509			18	10820	364.852	3947699	3947699			7	12211	608.747	7433410	7433410			20	10703	321.308	3438960	3438960			21	18312	556.551	10191571	10191571			13	17213	244.75	4212885	4212885
	14	23267	550.772	12814808	12814808			19	16863	292.628	4934593	4934593			8	15396	920.973	14179303	14179303			21	16054	461.477	7408551	7408551			22	13007	623.517	8110091	8110091			14	17080	278.871	4763125	4763125
	15	19989	835.219	16695184	16695184			20	12094	276.931	3349207	3349207			9	13511	408.304	5516593	5516593			22	13075	353.573	4622963	4622963			23	9993	732.913	7324001	7324001			15	18433	197.786	3645788	3645788
	16	15592	687.711	10722784	10722784			21	15602	416.742	6502013	6502013			10	13164	345.561	4548967	4548967			1	10074	366.031	3687397	3687397			1	10508	1149.98	12083984	12083984			16	9000	275.953	2483577	2483577
	17	13282	535.745	7115770	7115770			1	8453	377.578	3191671	3191671			11	18637	387.104	7214449	7214449			2	19651	344.881	6777258	6777258			2	14364	528.272	7588092	7588092			17	10410	249.334	2595563	2595563
	18	15091	475.026	7168621	7168621			2	19138	358.513	6861227	6861227			12	16757	391.927	6567515	6567515			3	11856	404.201	4792208	4792208			3	8369	1116.26	9342014	9342014			18	9529	239.451	2281725	2281725
	19	15719	475.863	7480089	7480089			3	16219	326.869	5301495	5301495			13	14961	359.506	5378572	5378572			4	9417	384.721	3622922	3622922			4	8312	1435.46	11931546	11931546			19	13835	160.101	2215001	2215001
	20	24866	638.716	15882302	15882302			4	22523	377.087	8493127	8493127			14	12372	234.088	2896137	2896137			5	14413	379.873	5475104	5475104			5	14005	1128.28	15801528	15801528			20	17111	181.639	3108030	3108030
	21	12841	589.151	7565285	7565285			5	12439	516.304	6422300	6422300			15	14209	362.478	5150447	5150447			6	13343	464.604	6199213	6199213			6	10194	1468.08	14965633	14965633			21	11219	172.054	1930274	1930274
	22	14640	590.842	8649934	8649934			6	22131	431.908	9558546	9558546			16	14940	459.741	6868527	6868527			7	9736	370.885	3610939	3610939			7	14552	1040.03	15134453	15134453			22	10712	135.387	1450266	1450266
	23	18774	509.554	9566376	9566376			7	17368	588.698	10224508	10224508			17	12206	440.181	5372847	5372847			8	11720	381.109	4466596	4466596			8	14521	1274.07	18500752	18500752			23	15723	127.198	1999936	1999936
	24	12579	545.428	6860944	6860944			8	13730	438.667	6022901	6022901			18	13350	404.149	5395393	5395393			9	12775	316.319	4040979	4040979			9	12904	891.076	11498448	11498448			24	8025	208.539	1673529	1673529
								9	17031	544.901	9280210	9280210										10	12841	432.799	5557567	5557567			10	13111	1187.83	15573624	15573624			25	16613	268.135	4454524	4454524
								10	17247	528.908	9122080	9122080										11	13098	399.131	5227816	5227816			11	11500	1069.7	12301509	12301509			26	11576	269.93	3124707	3124707
								11	19732	554.082	10933141	10933141										12	19354	470.513	9106300	9106300			12	14192	1152.87	16361499	16361499
								12	19485	411.569	8019431	8019431										13	13620	455.372	6202165	6202165			13	11271	882.022	9941265	9941265
								13	17101	376.943	6446100	6446100										14	13047	380.525	4964712	4964712			14	14304	1039.47	14868571	14868571
								14	12118	528.616	6405771	6405771										15	11571	629.955	7289213	7289213			15	11821	1208.16	14281653	14281653
								15	12949	587.35	7605598	7605598										16	20983	482.325	10120635	10120635			16	20552	535.783	11011418	11011418
								16	18948	358.15	6786220	6786220										17	17226	425.02	7321402	7321402			17	15796	1200.4	18961468	18961468
								17	21516	363.339	7817610	7817610										18	14128	440.641	6225375	6225375			18	7896	808.114	6380868	6380868
	No UV	1h	2h	4h	16h	No EU		18	13465	318.868	4293563	4293563										19	15390	631.99	9726321	9726321			19	8318	840.645	6992488	6992488
Average	1.12906e+07	6.00246e+06	6.85789e+06	6.19261e+06	1.0387e+07	3.4048e+06		19	15779	337.387	5323633	5323633										20	9607	603.417	5797030	5797030			20	8946	739.118	6612147	6612147
SD	3.5961e+06	2.75701e+06	2.76465e+06	2.18953e+06	4.07741e+06	1.50196e+06		20	11385	578.386	6584923	6584923										21	11517	477.685	5501495	5501495			21	13888	1090.85	15149712	15149712
SEM	412501	293899	317127	218953	429797	170064																22	19490	478.663	9329151	9329151			22	11484	924.268	10614297	10614297
																						23	15147	483.824	7328481	7328481			23	10692	897.923	9600588	9600588
Percentage	100	53.1634	60.7398	54.8476	91.9972	30.1561																24	10974	444.589	4878916	4878916
SD	31.8504	24.4187	24.4863	19.3925	36.1134	13.3028																25	14949	292.278	4369261	4369261
SEM	3.65349	2.60304	2.80877	1.93925	3.80668	1.50624																26	18666	521.432	9733052	9733052
																						27	20104	313.911	6310860	6310860
																						28	10112	252.358	2551842	2551842
variance	1.27618e+13	7.51475e+12	7.54271e+12	4.74611e+12	1.64406e+13	2.22697e+12																29	12206	299.038	3650056	3650056
t test		3.26164e-19	2.22022e-14	1.5919e-19	0.131257	1.64794e-32																30	12309	284.484	3501716	3501716
																						31	13547	323.873	4387508	4387508
																						32	15002	433.249	6499604	6499604
																						33	11425	365.106	4171335	4171335

## Sheet: IF XAB2
		noUV							1h							2h							4h							16h							NoEU
		Area	Mean	IntDen	RawIntDen				Area	Mean	IntDen	RawIntDen				Area	Mean	IntDen	RawIntDen				Area	Mean	IntDen	RawIntDen				Area	Mean	IntDen	RawIntDen				Area	Mean	IntDen	RawIntDen
	1	16202	3158.35	51171640	51171640			1	14854	3002.84	44604110	44604110			1	16933	3722.04	63025245	63025245			1	13907	4038.75	56166956	56166956			1	11751	3251.46	38207881	38207881			1	14073	2923.75	41145891	41145891
	2	18395	4237.75	77953426	77953426			2	16592	3056.18	50708127	50708127			2	18300	3535.85	64705989	64705989			2	13128	4469.26	58672383	58672383			2	10322	2408.74	24863044	24863044			2	13620	2643.2	36000451	36000451
	3	16126	3889.02	62714298	62714298			3	15696	2835.85	44511535	44511535			3	13663	4550.98	62180040	62180040			3	14403	5848.37	84234094	84234094			3	19862	4838.54	96103064	96103064			3	9149	4553.25	41657653	41657653
	4	16343	3229.68	52782581	52782581			4	12080	2314.51	27959269		27959269		4	15839	3557.03	56339847	56339847			4	9183	5313.81	48796718	48796718			4	17054	3978.14	67843144	67843144			4	9056	4712.61	42677366	42677366
	5	17705	3261.73	57748889	57748889			5	17606	2790.21	49124470	49124470			5	16979	4274.08	72569605	72569605			5	15868	6227.92	98824628	98824628			5	17122	3491.07	59774170	59774170			5	15824	3799.72	60126765	60126765
	6	12858	3573.4	45946823	45946823			6	15434	3181.64	49105425	49105425			6	12679	3891.19	49336441	49336441			6	7828	7300.41	57147629	57147629			6	13980	3292.51	46029221	46029221			6	12833	3118.62	40021195	40021195
	7	15768	3966.08	62537112	62537112			7	13060	2925.42	38206001	38206001			7	18513	5801.57	107404521	107404521			7	11006	5467.61	60176570	60176570			7	13030	4486.01	58452666	58452666			7	10018	4182.88	41904041	41904041
	8	15969	4577.82	73103173	73103173			8	12268	2821.28	34611512	34611512			8	13971	3516.42	49127914	49127914			8	15998	6697.21	107142002	107142002			8	18584	3958.04	73556172	73556172			8	15516	3023.78	46916993	46916993
	9	15640	4278.27	66912129	66912129			9	12974	3789.38	49163393	49163393			9	13355	3564.36	47601982	47601982			9	14044	5104.44	71686723	71686723			9	17277	4700.16	81204758	81204758			9	8136	3977.88	32363989	32363989
	10	8886	6489.98	57669991	57669991			10	12129	4989.63	60519247	60519247			10	18826	3041.84	57265773	57265773			10	16127	4808.85	77552367	77552367			10	14063	4233.46	59535127	59535127			10	9257	3988.39	36920566	36920566
	11	20140	3294.4	66349217	66349217			11	12114	3353.18	40620466	40620466			11	16980	3150.78	53500171	53500171			11	8638	5364.85	46341595	46341595			11	14700	4170.02	61299323	61299323			11	15703	3848.01	60425255	60425255
	12	17658	2932.63	51784415	51784415			12	9950	5077.82	50524347	50524347			12	15184	2769.82	42057023	42057023			12	15223	4734.62	72075069	72075069			12	15512	4880.34	75703846	75703846			12	14829	4224.42	62643892	62643892
	13	18607	2520.54	46899678	46899678			13	14362	4293.05	61656830	61656830			13	13307	4548.35	60524843	60524843			13	21840	4638.28	101299976	101299976			13	14038	3627.88	50928145	50928145			13	11464	4197.43	48119327	48119327
	1	15527	2420.41	37581743	37581743			14	11731	4891.98	57387853	57387853			14	19002	5055.05	96055992	96055992			14	15674	5509.4	86354331	86354331			14	14220	4231.5	60171879	60171879			14	13735	3407.22	46798221	46798221
	2	18373	2530.77	46497912	46497912			15	13422	2757.29	37008301	37008301			15	14395	3405.22	49018176	49018176			15	10722	5321.7	57059294	57059294			15	12052	4743.54	57169196	57169196			15	11489	3285.06	37742078	37742078
	3	19000	2586.96	49152231	49152231			16	14457	2610.11	37734420	37734420			16	15657	4281.43	67034326	67034326			16	14486	3800.99	55061178	55061178			16	15095	2884.99	43548888	43548888			16	18964	4134.2	78400938	78400938
	4	19589	3032.9	59411473	59411473			17	12967	3129.49	40580057	40580057			17	13474	2621.49	35322005	35322005			17	9478	3889.84	36867855	36867855			17	12009	4471.13	53693785	53693785			17	11335	3440.16	38994275	38994275
	5	12984	4109.13	53352988	53352988			18	12926	3188.02	41208295	41208295			²	9757	3699.62	36097187	36097187			18	17165	3796.86	65173018	65173018			18	16714	4261.79	71231507	71231507			18	10030	2776.43	27847560	27847560
	6	16713	3361.67	56183543	56183543			19	13760	2930.09	40318062	40318062			2	9085	4138.39	37597310	37597310			19	10423	4536.65	47285511	47285511			19	10569	3945.74	41702575	41702575			19	14885	3783.99	56324758	56324758
	7	15433	4348.67	67113026	67113026			20	21663	3297.05	71424047	71424047			3	10794	3742.91	40400914	40400914			20	12397	5180.88	64227411	64227411			20	8463	5582.34	47243345	47243345			20	9856	3845.55	37901706	37901706
	8	16243	3019.56	49046780	49046780			21	16814	3227.91	54274144	54274144			4	8273	4383.11	36261479	36261479			1	12557	3071.94	38574378	38574378			21	14206	4175.76	59320871	59320871			21	13012	3757.36	48890752	48890752
	9	13747	3607.85	49597066	49597066			22	12817	3536.88	45332212	45332212			5	10857	3828.78	41569076	41569076			2	12829	3251.14	41708923	41708923			22	8432	4481.38	37786974	37786974			22	16543	3175.9	52538898	52538898
	10	12886	3809.55	49089853	49089853			1	18779	3196.59	60028745	60028745			6	17136	5503.97	94315958	94315958			3	12252	3234.72	39631733	39631733			23	16237	3626.73	58887242	58887242			23	10196	2986.61	30451451	30451451
	11	12873	3655.99	47063553	47063553			2	12507	2883.4	36062659	36062659			7	14179	4137.79	58669689	58669689			4	13641	3599.99	49107461	49107461			24	14890	4637.43	69051291	69051291			24	13391	3890.33	52095383	52095383
	12	18409	4020.41	74011792	74011792			3	11502	3941.55	45335762	45335762			8	18412	5707.63	105088839	105088839			5	12674	3137.39	39763228	39763228			25	11005	3837.71	42234038	42234038			25	12321	4676.81	57623015	57623015
	13	11416	4783.11	54603966	54603966			4	21225	3757.22	79747084	79747084			9	11532	4030.47	46479342	46479342			6	11396	4267.39	48631225	48631225			26	13187	3716.11	49004385	49004385			1	15760	2852.82	44960358	44960358
	14	20333	3392.28	68975333	68975333			5	14703	4812.77	70762161	70762161			10	14312	3781.55	54121513	54121513			7	12635	4037.15	51009429	51009429			27	16155	4140.46	66889163	66889163			2	19103	3009.7	57494316	57494316
	15	21975	2650.99	58255385	58255385			6	22606	3826.51	86502026	86502026			11	13521	3906.95	52825816	52825816			8	12455	3183.79	39654074	39654074			28	16439	3985.98	65525475	65525475			3	17990	2586.41	46529432	46529432
	16	12897	4374.64	56419782	56419782			7	17521	4464.12	78215929	78215929			12	23589	5418.8	127824154	127824154			9	17607	5108.84	89951273	89951273			29	13772	3639.54	50123704	50123704			4	14970	3168.59	47433802	47433802
	17	18018	2181.43	39304998	39304998			8	14147	4338.61	61378269	61378269			13	13193	4076.13	53776436	53776436			10	24974	3737.64	93343713	93343713			1	20020	3258.3	65231215	65231215			5	13934	3493.93	48684398	48684398
	18	19899	3454.75	68746135	68746135			9	19396	3556.64	68984530	68984530			14	11840	4464.79	52863083	52863083			11	12405	4229.29	52464356	52464356			2	10580	2926.43	30961576	30961576			6	13801	3046.86	42049722	42049722
	19	13686	2994.76	40986218	40986218			10	17692	3338.16	59058774	59058774			15	10324	3807.22	39305696	39305696			12	13113	4014.58	52643179	52643179			3	10223	5825.24	59551449	59551449			7	14671	4013.29	58878992	58878992
	20	12221	4352.41	53190808	53190808			11	14432	6344.06	91557404	91557404			16	10781	4815.15	51912161	51912161			13	12756	4496.73	57360358	57360358			4	10878	3254.96	35407420	35407420			8	17116	4332.81	74160469	74160469
	21	16974	4431.13	75214067	75214067			12	9925	3625.76	35985715	35985715			17	9667	3783.79	36577883	36577883			14	16028	3504.54	56170724	56170724			5	13843	3824.31	52939970	52939970			9	10507	3831.33	40255758	40255758
	22	15371	4781.36	73494223	73494223			13	9653	4423.68	42701744	42701744			18	16162	3705.7	59891600	59891600			15	24167	2505.62	60553423	60553423			6	14566	5189.41	75589018	75589018			10	14126	2943.22	41575973	41575973
	1	20213	4216.74	85232947	85232947			14	15820	3329.29	52669393	52669393			19	10936	2895.25	31662502	31662502			16	12146	2415.48	29338454	29338454			7	17334	3814.65	66123152	66123152			11	20690	2949.57	61026580	61026580
	2	16019	3793.06	60761030	60761030			15	14306	2807.28	40160925	40160925			20	11559	4308.78	49805224	49805224			17	12082	2560.74	30938835	30938835			8	17090	5452.17	93177526	93177526			12	12870	3207.93	41286054	41286054
	3	13972	4079.93	57004786	57004786			16	9810	2671.31	26205564		26205564		1	12464	2999.16	37381490	37381490			18	12206	2358.15	28783535	28783535			9	16580	2923.25	48467504	48467504			13	10643	4273.3	45480714	45480714
	4	14720	3412.12	50226431	50226431			17	17779	3348	59524031	59524031			2	14126	3344.59	47245699	47245699			19	11235	3289.09	36952921	36952921			10	13287	6290.55	83582509	83582509			14	18017	4348.17	78341002	78341002
	5	16675	5722.99	95430886		95430886		18	11473	3453.21	39618631	39618631			3	12833	3996.91	51292334	51292334			20	11110	2801.73	31127194	31127194			11	15692	3509.82	55076181	55076181			15	12725	3571.14	45442755	45442755
	6	15314	4308.97	65987555	65987555			19	16642	4379.4	72882044	72882044			4	10983	3332.11	36596620	36596620			21	20122	3727.09	74996397	74996397			12	15542	3438.43	53440164	53440164			16	18400	4365.2	80319626	80319626
	7	13935	3931.86	54790499	54790499			20	13778	3266.01	44999135	44999135			5	15205	4049.3	61569548	61569548			22	13208	3859.09	50970794	50970794			13	15736	3779.31	59471232	59471232			17	13849	4000.01	55396083	55396083
	8	22427	2990.95	67077949	67077949			21	15208	4318.6	65677206	65677206			6	12051	4339.43	52294501	52294501			23	10904	4221.88	46035393	46035393			14	14613	4169.97	60935784	60935784			18	15169	2354.11	35709474	35709474
	9	19858	3884.31	77134596	77134596			22	20059	4569.23	91654132	91654132			7	7765	4863.41	37764353	37764353			24	17931	4262.76	76435624	76435624			15	20808	4390.65	91360689	91360689			19	13181	3297.24	43460911	43460911
	10	16995	4476.16	76072391	76072391			23	16195	5590.8	90543043	90543043			8	12031	3970.24	47765993	47765993			25	13775	4377.68	60302586	60302586			1	9555	2852.45	27255111	27255111			20	12584	4643.13	58429158	58429158
	11	15547	5561.46	86463995	86463995			24	18560	5062.31	93956461	93956461			9	16660	4018.09	66941355	66941355			1	9217	3435.39	31663982	31663982			2	9364	3929.56	36796408	36796408			21	9994	4408.89	44062435	44062435
	12	17484	5480.16	95815089		95815089		25	13909	3911.28	54401989	54401989			10	13144	4409.56	57959266	57959266			2	11977	4727.42	56620338	56620338			3	17596	3722.78	65506114	65506114			22	16899	4331.09	73191030	73191030
	13	14909	4804.6	71631728	71631728			1	13149	3847.43	50589912	50589912			11	16140	3242.11	52327635	52327635			3	9548	3707.84	35402503	35402503			4	15124	4730.62	71545852	71545852			23	20736	3140.53	65122114	65122114
	14	14725	7020.39	103375263		103375263		2	13181	3463.51	45652533	45652533			12	12137	4143.35	50287789	50287789			4	11106	3162.97	35127921	35127921			5	9906	5176.28	51276224	51276224			24	15707	4356.72	68431049	68431049
	15	17180	4689.44	80564672	80564672			3	19361	3746.85	72542801	72542801			13	9716	3943.32	38313266	38313266			5	8964	4545.52	40745998	40745998			6	11299	5026.56	56795063	56795063			25	10222	3764.62	38481951	38481951
	16	15195	4653.9	70716015	70716015			4	19910	3585.59	71389190	71389190			14	10372	3333.06	34570469	34570469			6	17758	3233.44	57419363	57419363			7	12421	2891.31	35912906	35912906			26	9306	5133.22	47769758	47769758
	17	17007	4101.76	69758619	69758619			5	17096	3608.43	61689739	61689739			15	8560	4627.42	39610737	39610737			7	16353	3650.4	59695024	59695024			8	12745	4834.93	61621183	61621183			27	11302	3896.58	44039116	44039116
	1	9652	3307.23	31921364	31921364			6	9262	4065.42	37653907	37653907			16	11565	4565.3	52797690	52797690			8	17530	4769.77	83614012	83614012			9	14583	4862.85	70914869	70914869			1	7878	3113.88	24531127		24531127
	2	14975	2861.82	42855698	42855698			7	10611	3793.05	40248081	40248081			17	8075	5490.98	44339652	44339652			9	12879	3498.73	45060125	45060125			10	11945	6116.08	73056610	73056610			2	7673	3070.14	23557164		23557164
	3	22247	3496.36	77783517	77783517			8	16607	4225.22	70168171	70168171			18	13788	4221.25	58202572	58202572			10	10878	4015.53	43680933	43680933			11	10315	5499.6	56728362	56728362			3	10336	2892.38	29895669	29895669
	4	18617	3952.68	73587012	73587012			9	16883	3882.72	65552030	65552030			19	11031	3472.75	38307904	38307904			11	17748	3452.68	61278155	61278155			12	14305	3515.41	50287912	50287912			4	17649	2488.6	43921299	43921299
	5	21998	3011.22	66240775	66240775			10	16734	4037.46	67562921	67562921			20	15037	3385.94	50914423	50914423			12	18447	4368.56	80586747	80586747			13	15167	4217.14	63961341	63961341			5	14011	3932.8	55102395	55102395
	6	14036	4015.15	56356666	56356666			11	13095	3735	48909792	48909792			21	8695	3940.24	34260362	34260362			13	12581	3985.41	50140445	50140445			14	9783	7974.64	78015895	78015895			6	18584	2605.62	48422776	48422776
	7	11638	2847.07	33134196	33134196			12	15767	3559.61	56124453	56124453			1	13334	3872.94	51641841	51641841			14	13983	3927.89	54923676	54923676			15	15260	3330.87	50829080	50829080			7	18923	3572.5	67602392	67602392
	8	11893	2401.56	28561716	28561716			13	16102	3880.39	62482056	62482056			2	13224	3008.97	39790596	39790596			15	21849	3762.27	82201839	82201839			16	8790	2785.67	24486058	24486058			8	13316	4215.26	56130394	56130394
	9	18517	2611.35	48354384	48354384			14	17618	3261.14	57454682	57454682			3	16694	4216.69	70393350	70393350			16	12113	3959.64	47963119	47963119			17	10795	3530.39	38110574	38110574			9	9949	3749.19	37300680	37300680
	10	20577	4208.15	86591190	86591190			15	11963	3110.55	37211505	37211505			4	18017	3757.37	67696564	67696564			17	15565	4250.19	66154198	66154198			18	11399	4734.89	53972955	53972955			10	18601	3573.3	66467031	66467031
	11	18201	3559.4	64784662	64784662			16	13356	3655.94	48828767	48828767			5	12593	5085.36	64039898	64039898			18	18795	3393.85	63787441	63787441			19	11061	2970.7	32858902	32858902			11	13033	3745.42	48814010	48814010
	12	20386	2776.4	56599700	56599700			17	13463	3548.68	47775939	47775939			6	12227	3838.83	46937381	46937381			19	14754	4811.87	70994365	70994365			20	16085	4829.69	77685604	77685604			12	11651	6929.57	80736434	80736434
	13	14200	3267.26	46395036	46395036			18	10820	3405.81	36850891	36850891			7	12211	4562.39	55711389	55711389			20	10703	4148.82	44404845	44404845			21	18312	4470.48	81863495	81863495			13	17213	4008.38	68996229	68996229
	14	23267	3174.31	73856743	73856743			19	16863	2586.12	43609766	43609766			8	15396	6296.26	96937200	96937200			21	16054	3865.43	62055619	62055619			22	13007	4656.28	60564254	60564254			14	17080	3491.44	59633786	59633786
	15	19989	4362.87	87209392	87209392			20	12094	3046.7	36846764	36846764			9	13511	3709.69	50121571	50121571			22	13075	3789.08	49542165	49542165			23	9993	5167.47	51638475	51638475			15	18433	2754.91	50781278	50781278
	16	15592	4389.84	68446321	68446321			21	15602	4058.41	63319237	63319237			10	13164	3951.93	52023192	52023192			1	10074	3821.6	38498781	38498781			1	10508	4193.68	44067155	44067155			16	9000	4044.64	36401787	36401787
	17	13282	3085.73	40984617	40984617			1	8453	2688.48	22725710		22725710		11	18637	3626	67577718	67577718			2	19651	3765.85	74002759	74002759			2	14364	4540.02	65212862	65212862			17	10410	4035.49	42009483	42009483
	18	15091	2874.98	43386279	43386279			2	19138	3093.33	59200141	59200141			12	16757	3574.22	59893213	59893213			3	11856	3648.11	43251977	43251977			3	8369	5507.92	46095760	46095760			18	9529	4539.13	43253388	43253388
	19	15719	2505.87	39389789	39389789			3	16219	2962.22	48044204	48044204			13	14961	3173.14	47473342	47473342			4	9417	3138.76	29557697	29557697			4	8312	6560.19	54528265	54528265			19	13835	3283.06	45421189	45421189
	20	24866	3818.35	94947037		94947037		4	22523	2955.29	66561946	66561946			14	12372	2710.98	33540234	33540234			5	14413	3716.2	53561513	53561513			5	14005	4636.26	64930880	64930880			20	17111	4045.72	69226250	69226250
	21	12841	4638.37	59561263	59561263			5	22131	3118.15	69007763	69007763			15	14209	3745.35	53217724	53217724			6	13343	4719.57	62973256	62973256			6	10194	5520.35	56274491	56274491			21	11219	4046.13	45393500	45393500
	22	14640	3670.12	53730635	53730635			6	17368	3812.29	66211902	66211902			16	14940	4537.6	67791770	67791770			7	9736	3355.07	32665008	32665008			7	14552	4524.74	65843964	65843964			22	10712	3059.38	32772031	32772031
	23	18774	3496.66	65646197	65646197			7	12439	3804.74	47327192	47327192			17	12206	3568.8	43560784	43560784			8	11720	3447.55	40405320	40405320			8	14521	4257.65	61825334	61825334			23	15723	2507.93	39432258	39432258
	24	12579	3671.84	46188084	46188084			8	19732	3701.95	73046807	73046807			18	13350	3149.71	42048679	42048679			9	12775	3950.5	50467685	50467685			9	12904	3979.91	51356753	51356753			24	8025	3670.45	29455394	29455394
								9	17247	4679.93	80714790	80714790										10	12841	4624.07	59377636	59377636			10	13111	5127.73	67229608	67229608			25	16613	4984.87	82813678	82813678
								10	13730	3416.8	46912605	46912605										11	13098	4264.09	55851029	55851029			11	11500	4924.64	56633325	56633325			26	11576	4732.28	54780922	54780922
								11	17031	3880.41	66087226	66087226										12	19354	4275.05	82739318	82739318			12	14192	5042.77	71566933	71566933
								12	12949	4139.55	53602962	53602962										13	13620	5402.32	73579580	73579580			13	11271	3839.08	43270313	43270313
								13	19485	3178.3	61929235	61929235										14	13047	3663.11	47792549	47792549			14	14304	4543.47	64989844	64989844
								14	17101	3307.25	56557298	56557298										15	11571	6439.66	74513256	74513256			15	11821	5864.05	69318902	69318902
								15	21516	3112.98	66978800	66978800										16	20983	4572.26	95939812	95939812			16	20552	4458.01	91620990	91620990
								16	13465	3041.94	40959756	40959756										17	17226	3885.08	66924357	66924357			17	15796	5411.59	85481397	85481397
								17	18948	3050.96	57809562	57809562										18	14128	4347.79	61425616	61425616			18	7896	3069.03	24233082	24233082
								18	12118	4351.79	52734991	52734991										19	15390	4751.09	73119206	73119206			19	8318	3331.86	27714393	27714393
								19	15017	3128.42	46979485	46979485										20	9607	4951.57	47569766	47569766			20	8946	3879.11	34702510	34702510
								20	11595	4703.27	54534470	54534470										21	11517	4980.61	57361647	57361647			21	13888	4748.03	65940588	65940588
																						22	19490	5074.3	98898110	98898110			22	11484	4291.82	49287294	49287294
																						23	15147	4551.87	68947194	68947194			23	10692	3855.94	41227677	41227677
	No UV	1h	2h	4h	16h	No EU																24	10974	4377.11	48034418	48034418
Average	5.9248e+07	5.59846e+07	5.44902e+07	5.74824e+07	5.74826e+07	5.02541e+07																25	14949	3269.53	48876201	48876201
SD	1.3951e+07	1.47646e+07	1.81523e+07	1.82659e+07	1.62283e+07	1.34385e+07																26	18666	4617.67	86193395	86193395
SEM	1.64414e+06	1.60144e+06	2.08221e+06	1.82659e+06	1.71061e+06	1.5415e+06																27	20104	3046.8	61252974	61252974
																						28	10112	2727.65	27582030	27582030
Percentage	100	94.4921	91.9697	97.0199	97.0204	84.8199																29	12206	3303.01	40316577	40316577
SD	23.5467	24.92	30.6379	30.8296	27.3904	22.6818																30	12309	3799.19	46764232	46764232
SEM	2.77501	2.70295	3.5144	3.08296	2.8872	2.60178																31	13547	3284.98	44501677	44501677
																						32	15002	4186.83	62810863	62810863
																						33	11425	3573.11	40822832	40822832
variance	1.91926e+14	2.15428e+14	325170812931061	3.30308e+14	2.6043e+14	1.78217e+14
t test		0.15711	0.0750806	0.473473	0.457942	0.000104313

## Sheet: PLA
		noUV							1h							2h							4h							16h							contrôle noEU
		Area	Mean	IntDen	RawIntDen				Area	Mean	IntDen	RawIntDen				Area	Mean	IntDen	RawIntDen				Area	Mean	IntDen	RawIntDen				Area	Mean	IntDen	RawIntDen				Area	Mean	IntDen	RawIntDen
	1	15899	1603.07	25487258	25487258			1	12092	642.828	7773074	7773074			1	11888	610.998	7263550	7263550			1	17961	1453.03	26097945	26097945			1	16404	1497.19	24559945	24559945			1	14378	227.001	3263815	3263815
	2	13126	1567.04	20568899	20568899			2	12692	619.381	7861178	7861178			2	20256	798.547	16175375	16175375			2	16233	1258.84	20434703	20434703			2	9907	619.915	6141500	6141500			2	13191	217.952	2875001	2875001
	3	23092	1497.35	34576727	34576727			3	11689	707.639	8271596	8271596			3	13094	703.803	9215602	9215602			3	9485	1577.54	14962932	14962932			3	9763	580.125	5663761	5663761			3	16089	292.841	4711526	4711526
	4	14786	1303.01	19266314	19266314			4	10820	627.684	6791542	6791542			4	15641	726.705	11366389	11366389			4	11281	969.717	10939375	10939375			4	15876	1191.57	18917421	18917421			4	18155	298.344	5416438	5416438
	5	12462	898.093	11192030	11192030			5	15601	474.951	7409713	7409713			5	20809	554.821	11545275	11545275			5	17451	1644.04	28690076	28690076			5	13920	1005.35	13994502	13994502			5	11643	318.998	3714092	3714092
	6	21561	1154.93	24901517	24901517			6	10328	519.249	5362803	5362803			6	10528	544.132	5728617	5728617			6	26673	1027.33	27401983	27401983			6	11647	1262.85	14708442	14708442			6	15416	204.719	3155941	3155941
	7	19748	1244.92	24584634	24584634			7	11625	689.8	8018930	8018930			7	14668	977.017	14330890	14330890			7	11258	1561.53	17579720	17579720			7	18652	888.003	16563025	16563025			7	14749	238.74	3521175	3521175
	8	11297	1785.6	20171950	20171950			8	15321	594.641	9110494	9110494			8	16378	659.401	10799676	10799676			8	12096	1555.85	18819589	18819589			8	13678	1224.26	16745382	16745382			8	17151	359.37	6163548	6163548
	9	11562	1639.6	18957003	18957003			9	11777	715.115	8421912	8421912			9	16724	1035.78	17322305	17322305			9	11415	639.81	7303430	7303430			9	15279	1117.02	17066872	17066872			9	13208	310.921	4106645	4106645
	10	20092	1577.26	31690388	31690388			10	13125	492.641	6465909	6465909			10	24420	590.431	14418330	14418330			10	14985	1559.99	23376391	23376391			10	15476	847.767	13120041	13120041			10	19246	232.157	4468102	4468102
	11	10502	1569.65	16484430	16484430			11	12154	284.365	3456175	3456175			11	21623	921.051	19915880	19915880			11	15502	1004.49	15571618	15571618			11	16467	1116.97	18393096	18393096			11	18831	236.984	4462646	4462646
	12	16084	1348.42	21687917	21687917			12	10947	433.291	4743234	4743234			12	17155	1450.32	24880195	24880195			12	13385	1059.1	14176020	14176020			12	13497	1261.56	17027279	17027279			12	16742	231.467	3875228	3875228
	13	15123	1336.72	20215214	20215214			13	11901	513.679	6113294	6113294			13	14827	623.691	9247473	9247473			13	17789	1061.01	18874324	18874324			13	12057	1093.67	13186394	13186394			13	18307	190.709	3491313	3491313
	14	9378	1384.05	12979598	12979598			14	12246	666.622	8163456	8163456			14	22000	1050.71	23115733	23115733			14	16640	767.337	12768482	12768482			14	18780	1156.03	21710293	21710293			14	12863	124.005	1595077	1595077
	15	8543	1139.55	9735172	9735172			15	13974	458.788	6411106	6411106			15	9382	544.495	5108452	5108452			15	11381	1283.13	14603362	14603362			15	10644	994.9	10589711	10589711			15	16841	257.256	4332442	4332442
	16	17565	1382.56	24284676	24284676			16	13113	618.934	8116079	8116079			16	12894	973.023	12546159	12546159			16	8309	549.953	4569560	4569560			1	11410	2445.41	27902154	27902154			16	16384	215.402	3529140	3529140
	17	14758	1894.08	27952869	27952869			17	9462	472.727	4472940	4472940			17	11943	746.556	8916120	8916120			17	13621	1444.37	19673767	19673767			2	10699	1350.4	14447945	14447945			17	12732	229.436	2921175	2921175
	18	23723	1424.81	33800873	33800873			18	11508	581.454	6691370	6691370			1	14206	432.338	6141798	6141798			18	12339	1147.69	14161414	14161414			3	11706	1934.27	22642506	22642506			18	12741	234.843	2992130	2992130
	19	12527	1836.02	22999792	22999792			19	12195	735.281	8966753	8966753			2	15999	1008.75	16139026	16139026			19	15645	1100.86	17222917	17222917			4	15274	2762.36	42192369	42192369			19	17228	169.34	2917385	2917385
	20	13589	1093.79	14863502	14863502			1	17709	459.69	8140647	8140647			3	11833	855.196	10119534	10119534			20	18179	802.451	14587762	14587762			5	7088	929.156	6585861	6585861			20	11070	236.651	2619728	2619728
	21	13904	1292.96	17977327	17977327			2	11294	448.73	5067956	5067956			4	11287	572.632	6463302	6463302			21	11637	1442.76	16789410	16789410			6	12462	1945.87	24249386	24249386			21	20142	302.909	6101194	6101194
	22	9940	1781.44	17707545	17707545			3	15626	635.009	9922645	9922645			5	13318	755.87	10066677	10066677			22	10592	712.483	7546617	7546617			7	11771	1778.53	20935076	20935076			22	22092	302.089	6673743	6673743
	23	9187	1862.55	17111279	17111279			4	8045	641.693	5162419	5162419			6	14511	440.846	6397122	6397122			23	13325	1378.46	18367940	18367940			8	9959	2029.31	20209910	20209910			1	11758	387.909	4561033	4561033
	24	13968	1377.73	19244147	19244147			5	11792	520.536	6138155	6138155			7	13781	503.461	6938201	6938201			24	10349	1317.34	13633135	13633135			9	10563	2172.22	22945204	22945204			2	13072	348.63	4557297	4557297
	1	14479	1338.81	19384682	19384682			6	10860	723.558	7857835	7857835			8	11989	513.779	6159696	6159696			1	15341	1391.55	21347792	21347792			10	18560	1931.92	35856514	35856514			3	11111	364.446	4049357	4049357
	2	16313	1376.06	22447639	22447639			7	14525	567.546	8243607	8243607			9	17863	721.294	12884474	12884474			2	15918	792.821	12620129	12620129			11	13734	1588	21809571	21809571			4	10169	403.808	4106325	4106325
	3	20578	1198.76	24668142	24668142			8	14337	707.873	10148779	10148779			10	16730	959.919	16059445	16059445			3	9691	688.046	6667852	6667852			12	13502	2001.13	27019243	27019243			5	18073	378.188	6834989	6834989
	4	15951	1316.39	20997685	20997685			9	17882	732.268	13094418	13094418			11	15694	1304.23	20468600	20468600			4	13327	1130.65	15068143	15068143			13	9474	1650.65	15638283	15638283			6	18547	344.376	6387136	6387136
	5	14087	1430.46	20150882	20150882			10	12805	653.833	8372334	8372334			12	14139	526.207	7440039	7440039			5	16688	1247.05	20810757	20810757			14	11766	1859.27	21876147	21876147			7	10896	436.962	4761137	4761137
	6	14239	1583.81	22551895	22551895			11	9989	624.556	6238688	6238688			13	11390	956.104	10890022	10890022			6	15926	1265.58	20155658	20155658			1	15494	1211.35	18768593	18768593			8	19056	340.24	6483618	6483618
	7	12111	1325.57	16053917	16053917			12	9483	626.115	5937444	5937444			14	15764	1349.8	21278316	21278316			7	11782	999.948	11781388	11781388			2	11475	1731.46	19868541	19868541			9	12400	389.382	4828335	4828335
	8	11516	1447.16	16665530	16665530			13	18650	760.858	14189998	14189998			15	12199	789.3	9628670	9628670			8	11619	936.203	10877747	10877747			3	13621	567.011	7723262	7723262			10	16889	365.745	6177068	6177068
	9	16977	1747.96	29675097	29675097			14	15630	599.848	9375630	9375630			16	10291	1037.57	10677667	10677667			9	11295	867.95	9803500	9803500			4	15050	362.902	5461680	5461680			11	16242	340.783	5535004	5535004
	10	17271	1059.4	18296913	18296913			15	11939	797.077	9516298	9516298			17	12068	701.643	8467429	8467429			10	12084	897.99	10851312	10851312			1	10493	2913.99	30576526	30576526			12	8603	372.256	3202518	3202518
	11	10639	1217.57	12953684	12953684			16	15227	590.094	8985359	8985359			18	13327	923.716	12310366	12310366			11	9713	1189.76	11556133	11556133			2	14112	2327.97	32852362	32852362			13	10474	331.897	3476294	3476294
	12	14112	856.7	12089745	12089745			17	17305	668.773	11573116	11573116			19	10111	1057.62	10693614	10693614			12	17019	896.628	15259715	15259715			3	13572	2401.72	32596153	32596153			14	10677	383.384	4093392	4093392
	13	15057	1029.63	15503183	15503183			18	14978	867.305	12990489	12990489			20	9433	1212.03	11433073	11433073			13	11202	1478.31	16559984	16559984			4	11740	2779.61	32632633	32632633			15	7553	364.837	2755614	2755614
	14	19902	1173.7	23358948	23358948			1	12354	1151.66	14227665	14227665			21	13378	1300.31	17395595	17395595			14	10916	1199.99	13099140	13099140			5	15204	3098.37	47107578	47107578			16	9631	252.929	2435959	2435959
	15	17187	2106.12	36197830	36197830			2	13581	1067.71	14500537	14500537			22	10538	723.146	7620511	7620511			15	11913	1202.54	14325817	14325817			6	11282	1742.89	19663321	19663321			17	16244	383.222	6225065	6225065
	1	10590	1227.11	12995127	12995127			3	11523	620.094	7145341	7145341			1	18618	334.451	6226811	6226811			16	10988	706.244	7760206	7760206			7	12066	2302.35	27780198	27780198			18	9964	407.495	4060278	4060278
	2	7500	1408.79	10565893	10565893			4	19013	961.453	18280098	18280098			2	11756	383.468	4508044	4508044			17	9897	1094.99	10837090	10837090			8	8483	2603.17	22082668	22082668			19	12666	348.497	4414063	4414063
	3	18103	1104.29	19990991	19990991			5	13085	716.409	9374210	9374210			3	16260	488.875	7949100	7949100			18	12517	648.542	8117797	8117797			9	13927	2599.2	36199119	36199119			1	18734	313.76	5877982	5877982
	4	13633	1647.21	22456369	22456369			6	10978	955.486	10489329	10489329			4	11444	474.292	5427794	5427794			19	19797	808.025	15996478	15996478			10	9301	2032.19	18901365	18901365			2	19129	266.003	5088378	5088378
	5	11524	1472.05	16963922	16963922			7	11953	825.628	9868736	9868736			5	19099	496.135	9475684	9475684			20	10582	1079.73	11425688	11425688			11	14820	2086.55	30922690	30922690			3	12573	444.865	5593289	5593289
	6	16413	1079.39	17716048	17716048			8	16646	848.112	14117674	14117674			6	11596	404.916	4695403	4695403			21	12576	505.596	6358381	6358381										4	20093	396.097	7958781	7958781
	7	14419	1858.24	26793961	26793961			9	21961	970.907	21322080	21322080			7	11380	520.556	5923923	5923923			22	13118	1438.47	18869859	18869859										5	19420	426.717	8286850	8286850
	8	10791	1189.53	12836230	12836230			10	14641	1266.13	18537347	18537347			8	18967	475.803	9024554	9024554			23	11596	708.052	8210569	8210569										6	18702	461.561	8632105	8632105
	9	10025	1807.49	18120073	18120073			11	12019	1052.26	12647085	12647085			9	11272	714.425	8053002	8053002			24	11965	785.332	9396500	9396500										7	13970	488.314	6821749	6821749
	10	13132	1890.02	24819709	24819709			12	18172	955.128	17356584	17356584			10	19789	499.257	9879797	9879797			25	10352	893.965	9254326	9254326										8	16499	364.633	6016085	6016085
	11	16925	1440.41	24378895	24378895			13	20083	933.192	18741288	18741288			11	10317	458.066	4725872	4725872			26	17492	1536.99	26885053	26885053										9	12531	390.117	4888556	4888556
	12	19593	1724.41	33786409	33786409			14	9410	631.181	5939412	5939412			12	9517	501.341	4771261	4771261			1	9839	1582.98	15574982	15574982										10	8525	435.889	3715955	3715955
	13	11763	2095.1	24644650	24644650			15	14568	887.414	12927854	12927854			13	13529	470.261	6362165	6362165			2	15367	1497.06	23005362	23005362										11	16484	556.644	9175715	9175715
	14	14376	1843.05	26495698	26495698			16	12914	884.082	11417035	11417035			14	10354	480.011	4970031	4970031			3	11194	1834.26	20532750	20532750										12	16428	370.932	6093677	6093677
	15	12064	1674.48	20200892	20200892			17	16053	1504.52	24152107	24152107			15	13472	392.562	5288597	5288597			4	12920	1055.62	13638660	13638660										13	14715	526.644	7749567	7749567
	16	16113	1494.85	24086569	24086569			18	12457	955.888	11907495	11907495			16	19753	270.374	5340693	5340693			5	12647	1103.4	13954767	13954767										14	12711	559.708	7114447	7114447
	17	12052	1474.65	17772514	17772514			19	17635	939.313	16564780	16564780			17	10875	363.81	3956431	3956431			6	11796	1386.32	16352980	16352980										15	16277	387.921	6314183	6314183
	18	13341	1079.15	14396927	14396927			20	18449	1113.79	20548240	20548240			18	9278	374.397	3473654	3473654			7	12042	1425.11	17161207	17161207										16	15859	304.621	4830991	4830991
	19	11546	1454.28	16791087	16791087			21	18822	841.441	15837610	15837610			19	17707	386.707	6847413	6847413			8	14109	694.081	9792790	9792790										17	16016	365.078	5847087	5847087
	20	16154	1392.77	22498738	22498738			1	11880	858.034	10193438	10193438			20	12256	371.262	4550182	4550182			9	15644	1476.07	23091585	23091585										18	13594	449.897	6115896	6115896
	21	13889	1560.92	21679561	21679561			2	11903	1673.24	19916524	19916524			21	13793	503.647	6946806	6946806			10	9519	862.172	8207016	8207016										19	11901	267.712	3186044	3186044
	22	13961	1561.25	21796638	21796638			3	11140	966.425	10765969	10765969			22	12594	402.285	5066377	5066377			11	11990	1018.15	12207612	12207612										20	11638	275.708	3208685	3208685
	23	17499	1426.58	24963794	24963794			4	11945	1473.76	17604116	17604116			23	11048	334.427	3694744	3694744			12	15562	1344.34	20920672	20920672										21	19041	302.14	5753043	5753043
	24	17524	1590.07	27864459	27864459			5	13569	1149.74	15600782	15600782			24	10993	300.346	3301703	3301703			13	14682	1167.11	17135544	17135544										22	13837	298.444	4129565	4129565
	25	16398	1611.48	26425135	26425135			6	16830	1122.59	18893105	18893105			25	13682	528.061	7224932	7224932			14	14716	1248.41	18371608	18371608										23	11279	321.009	3620665	3620665
	26	17486	1731	30268294	30268294			7	15847	1008.6	15983342	15983342			26	11136	851.601	9483428	9483428			15	16349	3185.02	52071915	52071915										24	13726	272.097	3734810	3734810
	1	15357	931.309	14302106	14302106			8	10530	998.53	10514519	10514519			27	21974	568.196	12485536	12485536			16	12409	2504.47	31077980	31077980										25	15012	298.406	4479677	4479677
	2	13225	1115.52	14752709	14752709			9	13320	1622.48	21611493	21611493			28	16368	377.894	6185373	6185373			17	14462	1420.14	20538134	20538134										26	12176	387.558	4718908	4718908
	3	17136	1908.64	32706400	32706400			10	14815	854.95	12666091	12666091			29	13393	476.391	6380299	6380299			18	13805	1910.96	26380837	26380837										27	13582	195.825	2659690	2659690
	4	16407	1334.57	21896318	21896318			11	14875	736.365	10953431	10953431			30	12247	658.019	8058755	8058755			19	13352	1394.99	18625912	18625912										1	15567	378.774	5896370	5896370
	5	13363	1245.68	16646013	16646013			12	12908	780.928	10080214	10080214			1	8176	371.018	3033440	3033440			20	11724	1783.44	20909023	20909023										2	16291	368.271	5999502	5999502
	6	18244	1708.2	31164352	31164352			13	13243	792.947	10500997	10500997			2	9983	539.879	5389613	5389613			21	14412	1752.71	25260070	25260070										3	13890	311.266	4323487	4323487
	7	14945	1249.41	18672440	18672440			14	16806	900.738	15137795	15137795			3	9901	528.141	5229123	5229123			22	11977	1493.94	17892897	17892897										4	14865	518.16	7702453	7702453
	8	16064	910.025	14618644	14618644			15	11757	994.675	11694395	11694395			4	18328	722.004	13232890	13232890			23	10478	837.67	8777103	8777103										5	17772	351.103	6239805	6239805
	9	15207	1561.35	23743371	23743371			16	18613	500.426	9314437	9314437			5	11019	551.953	6081971	6081971			1	9170	921.495	8450106	8450106										6	14166	334.73	4741788	4741788
	10	16713	1706.14	28514735	28514735			17	15563	722.059	11237411	11237411			6	8869	535.349	4748009	4748009			2	9475	954.507	9043956	9043956										7	17568	307.789	5407245	5407245
	11	14234	1228.16	17481605	17481605			18	11595	2068.15	23980216	23980216			7	12279	572.983	7035661	7035661			3	9349	1208.46	11297932	11297932										8	14319	368.115	5271037	5271037
	12	13091	1627.05	21299699	21299699			19	10492	1365.09	14322470	14322470			8	12641	488.822	6179205	6179205			4	8971	1085.99	9742465	9742465										9	19427	326.614	6345125	6345125
	13	18110	1093.84	19809444	19809444			20	16181	1144.84	18524682	18524682			9	9725	634.231	6167892	6167892			5	13982	1365.8	19096565	19096565										10	18354	282.969	5193607	5193607
	14	12982	1380.8	17925530	17925530			21	15927	833.157	13269687	13269687			10	9611	740.2	7114067	7114067			6	13207	1126	14871042	14871042										11	13476	467.084	6294424	6294424
	15	13154	1110.36	14605677	14605677			22	12069	1345.39	16237497	16237497			11	13947	498.983	6959321	6959321			7	11029	1197.35	13205515	13205515										12	17416	387.473	6748232	6748232
	16	18380	1192.99	21927086	21927086			23	12838	1802.24	23137199	23137199			12	16140	581.768	9389739	9389739			8	15029	1014.65	15249169	15249169										13	20536	240.193	4932598	4932598
	17	21324	1548.03	33010241	33010241			24	13276	1319.22	17513950	17513950			13	11994	630.91	7567135	7567135			9	13562	762.152	10336311	10336311										14	19028	409.146	7785234	7785234
	18	24955	1458.8	36404450	36404450										14	10813	660.403	7140936	7140936			10	12489	1192.06	14887691	14887691										15	21669	293.951	6369628	6369628
	19	25097	1150.05	28862885	28862885										15	10467	624.195	6533448	6533448			11	9171	783.627	7186639	7186639										16	11045	324.616	3585388	3585388
	20	15937	827.949	13195018	13195018										16	12283	428.804	5267002	5267002			12	7921	927.14	7343877	7343877										17	14392	477.282	6869038	6869038
	21	18180	1315.11	23908748	23908748										17	12134	422.415	5125587	5125587			13	9693	612.274	5934775	5934775										18	13262	273.117	3622080	3622080
															18	10491	873.986	9168991	9168991			14	15383	690.58	10623191	10623191										19	14899	249.425	3716187	3716187
															19	11290	562.403	6349525	6349525			15	11325	919.828	10417056	10417056										20	11451	253.623	2904233	2904233
															20	12566	848.903	10667312	10667312			16	11095	1121.1	12438585	12438585										21	16098	280.813	4520522	4520522
															21	17015	849.906	14461151	14461151			17	12422	878.654	10914634	10914634										22	15905	279.757	4449542	4449542
															22	17027	692.409	11789652	11789652			18	13518	716.537	9686151	9686151										23	13411	351.986	4720479	4720479
															23	12654	793.792	10044642	10044642			19	19331	1061.23	20514702	20514702										24	14907	244.331	3642241	3642241
															24	13324	415.06	5530260	5530260			20	12218	1105.57	13507846	13507846										25	18534	230.812	4277872	4277872
															25	15521	467.98	7263524	7263524			21	10416	991.83	10330901	10330901										26	22534	273.168	6155558	6155558
															26	20536	505.272	10376256	10376256			22	15471	1071.02	16569800	16569800										27	13352	317.695	4241858	4241858
																						23	12630	1096.02	13842731	13842731										28	11844	302.512	3582955	3582955
																						24	13067	934.396	12209750	12209750										29	11982	260.685	3123524	3123524
																						25	13525	1347.86	18229805	18229805										30	13762	652.262	8976429	8976429
																						26	14133	1394.11	19702970	19702970										31	15633	385.761	6030599	6030599
																						27	13888	1446.17	20084405	20084405										32	12745	464.52	5920304	5920304
																																				33	14244	432.007	6153506	6153506
	No UV	1h	2h	4h	16h	No EU
Average	2.14674e+07	1.16968e+07	9.0073e+06	1.53925e+07	2.1269e+07	4.98225e+06
SD	6.27399e+06	5.04728e+06	4.53477e+06	6.73314e+06	9.53442e+06	1.58695e+06
SEM	676542	557379	465258	673314	1.43737e+06	157907
Percentage	100	54.4862	41.9581	71.7019	99.0758	23.2085
SD	29.2257	23.5114	21.124	31.3645	44.4136	7.39239
SEM	3.15149	2.5964	2.16728	3.13645	6.6956	0.73557
variance	3.89052e+13	2.51644e+13	2.03477e+13	4.48818e+13	8.88392e+13	2.49348e+12
t test		9.23274e-22	2.39897e-32	1.53475e-09	0.901016	1.552e-41
