# Supplementary material for: XAB2 dynamics during DNA damage-dependent transcription inhibition
Source: eLife. 2022 Jul 26;11:e77094. doi: 10.7554/eLife.77094 (PMC9436415; doi:10.7554/eLife.77094)
Supplement: Figure 5—source data 1. [file elife-77094-fig5-data1.xlsx]

## Sheet: IF R-loops
		siMock											siXAB2											siAQR											siCCDC16
		Area	Mean	Min	Max	IntDen	RawIntDen	NUCLEOLI	NUCLEI	NUCLEI-NUCLEOLI			Area	Mean	Min	Max	IntDen	RawIntDen	NUCLEOLI	NUCLEI	NUCLEI-NUCLEOLI			Area	Mean	Min	Max	IntDen	RawIntDen	NUCLEOLI	NUCLEI	NUCLEI-NUCLEOLI			Area	Mean	Min	Max	IntDen	RawIntDen	NUCLEOLI	NUCLEI	NUCLEI-NUCLEOLI
	1	14.158	2144.65	990	4026	30363	2356967	2356967				1	15.562	2670.16	1353	5060	41552.3	3225548	3225548				1	15.858	3137.93	2051	5245	49761.5	3862793	3862793				1	11.452	1465.1	1055	2140	16778.8	1302473	1302473
	2	123.296	515.797	15	4026	63595.7	4936694		4936694	2579727		2	219.797	493.18	9	5060	108399	8414634		8414634	5189086		2	130.626	1037.63	92	5245	135541	10521542		10521542	6658749		2	151.392	384.609	0	2140	58226.8	4519925		4519925	3217452
	3	17.211	1955.55	936	4438	33656.4	2612615	2612615				3	15.768	2183.83	1352	3330	34434.3	2673006	2673006				3	17.185	3353	2129	5907	57621.1	4472905	4472905				3	6.982	1549.69	1056	2584	10820.2	839931	839931
	4	151.366	529.912	37	4438	80210.9	6226467		6226467	3613852		4	284.285	395.339	11	3330	112389	8724350		8724350	6051344		4	123.592	1184.92	151	5907	146447	11368120		11368120	6895215		4	98.871	482.895	6	2584	47744.4	3706216		3706216	2866285
	5	18.576	2175.93	990	4662	40420.6	3137698	3137698				5	11.749	2334.97	1231	5265	27432.7	2129493	2129493				5	7.111	4278.34	2136	7411	30423.3	2361644	2361644				5	9.224	1417.2	982	2290	13071.8	1014712	1014712
	6	137.338	586.233	12	4662	80511.9	6249829		6249829	3112131		6	229.716	329.48	0	5265	75686.8	5875279		5875279	3745786		6	86.363	1040.44	163	7411	89855.2	6975120		6975120	4613476		6	101.641	463.07	18	2290	47066.9	3653621		3653621	2638909
	7	14.815	2239.37	1265	7013	33175.3	2575271	2575271				7	18.267	2849.54	1260	5833	52052.6	4040644	4040644				7	6.75	3882.06	1936	7330	26205.1	2034200	2034200				7	7.948	1805.32	1311	2673	14349.3	1113880	1113880
	8	110.233	689.291	12	7013	75982.9	5898265		5898265	3322994		8	118.774	883.337	67	5833	104918	8144368		8144368	4103724		8	80.128	840.084	57	7330	67313.9	5225325		5225325	3191125		8	129.673	506.995	44	2673	65743.4	5103412		5103412	3989532
	9	15.626	2607.19	1175	4984	40740.4	3162519	3162519				9	9.108	2067.7	1260	3412	18832.1	1461863	1461863				9	13.282	4296.84	2283	8261	57068.9	4430040	4430040				9	6.351	1712.26	1311	2529	10874.5	844144	844144
	10	149.176	580.712	29	4984	86628.5	6724641		6724641	3562122		10	119.006	486.871	7	3412	57940.7	4497712		4497712	3035849		10	126.027	1060.28	122	8261	133624	10372708		10372708	5942668		10	92.482	490.725	25	2529	45383	3522913		3522913	2678769
	11	8.283	2065.33	867	4197	17107.7	1328005	1328005				11	13.359	2731.03	1262	5330	36483.6	2832080	2832080				11	7.987	2917.55	1780	5076	23302.4	1808879	1808879				11	7.034	1707.06	1203	2663	12007	932057	932057
	12	108.597	476.694	16	4197	51767.7	4018529		4018529	2690524		12	153.325	504.339	0	5330	77327.5	6002639		6002639	3170559		12	90.743	763.266	49	5076	69260.7	5376447		5376447	3567568		12	123.953	315.627	7	2663	39122.9	3036964		3036964	2104907
	13	7.755	1751.75	1074	3312	13585	1054554	1054554				13	8.425	1958.64	1261	3659	16501.5	1280950	1280950				13	3.787	2544.69	1831	3750	9637.71	748139	748139				13	5.964	1518.59	1164	2252	9057.59	703106	703106
	14	118.749	396.647	9	3312	47101.3	3656294		3656294	2601740		14	185.015	304.72	2	3659	56377.7	4376388		4376388	3095438		14	60.328	731.675	109	3750	44140.2	3426434		3426434	2678295		14	108.43	390.789	0	2252	42373.2	3289274		3289274	2586168
	15	6.48	1830.86	1074	3275	11863.6	920923	920923				15	14.647	3171.62	1721	5360	46455.1	3606133	3606133				15	3.002	2368.09	1782	3745	7107.99	551766	551766				15	4.844	1641.52	1149	2461	7951.09	617213	617213
	16	82.021	444.319	6	3275	36443.6	2828976		2828976	1908053		16	184.306	538.202	0	5360	99194.1	7700061		7700061	4093928		16	74.524	635.564	100	3745	47364.7	3676738		3676738	3124972		16	99.631	408.63	12	2461	40712.4	3160346		3160346	2543133
	17	9.7	2131.8	1211	4187	20679.1	1605243	1605243				17	11.22	3643.2	1720	7555	40878.3	3173226	3173226				17	8.927	3635.95	2248	6184	32459.6	2519712	2519712				17	12.509	1022.83	749	1530	12794.2	993168	993168
	18	101.834	576.209	56	4187	58677.8	4554934		4554934	2949691		18	263.519	438.844	0	7555	115644	8976992		8976992	5803766		18	94.143	944.964	149	6184	88962.2	6905800		6905800	4386088		18	109.357	445.701	24	1530	48740.7	3783555		3783555	2790387
	19	5.771	1959.62	1210	3463	11309.5	877911	877911				19	17.881	3247.73	1505	6318	58071.2	4507844	4507844				19	8.541	2822.55	2052	4051	24107.2	1871349	1871349				19	5.977	1786.71	1311	2539	10679.8	829034	829034
	20	104.952	357.695	0	3463	37540.7	2914145		2914145	2036234		20	226.766	553.171	1	6318	125441	9737476		9737476	5229632		20	129.222	829.426	133	4051	107180	8319977		8319977	6448628		20	92.095	458.399	24	2539	42216.3	3277094		3277094	2448060
	21	11.104	1930.8	1210	3727	21440.5	1664348	1664348				21	13.681	3327.91	1511	7834	45529	3534246	3534246				21	9.43	4580.39	2365	7792	43192.2	3352843	3352843				21	7.15	876.187	591	1619	6264.43	486284	486284
	22	148.262	473.215	0	3727	70159.7	5446228		5446228	3781880		22	241.246	496.942	4	7834	119885	9306238		9306238	5771992		22	89.983	1192.72	181	7792	107324	8331135		8331135	4978292		22	86.491	270.477	8	1619	23394	1815985		1815985	1329701
	23	7.652	1703.86	1210	2658	13038	1012091	1012091				23	5.694	2065	1505	3335	11758	912729	912729				23	6.209	3368.57	2017	6763	20916.3	1623649	1623649				23	9.675	1217.62	939	1667	11779.9	914430	914430
	24	89.171	503.511	0	2658	44898.6	3485305		3485305	2473214		24	163.502	415.71	0	3335	67969.3	5276195		5276195	4363466		24	84.366	842.104	119	6763	71044.9	5514942		5514942	3891293		24	135.934	397	0	1667	53965.5	4189139		4189139	3274709
	25	7.91	2320.74	1350	3971	18356.4	1424935	1424935				1	18.383	1839.82	1023	3645	33821.3	2625419	2625419				25	13.9	5099.78	2245	9868	70886.7	5502667	5502667				25	6.055	1402.95	944	2167	8494.41	659389	659389
	26	121.621	417.501	0	3971	50777.1	3941629		3941629	2516694		2	185.53	460.627	17	3645	85460.2	6633947		6633947	4008528		26	131.064	1116.7	126	9868	146359	11361300		11361300	5858633		26	119.895	335.04	15	2167	40169.7	3118221		3118221	2458832
	27	8.077	2283.73	1377	3932	18446.1	1431898	1431898				3	22.312	2138.17	1023	4263	47706.9	3703305	3703305				1	10.061	6182.86	4525	8546	62206	4828811					27	6.583	1523.43	1055	2762	10028.5	778473	778473
	28	109.1	526.246	27	3932	57413.4	4456780		4456780	3024882		4	193.569	533.233	1	4263	103217	8012361		8012361	4309056		2	102.259	2427.56	843	8546	248241	19269998					28	92.237	431.157	12	2762	39768.5	3087081		3087081	2308608
	29	7.82	2510.61	1375	4773	19631.7	1523937	1523937				5	23.227	2612.93	1022	4916	60689.7	4711113	4711113				3	7.691	4051.27	2927	6306	31157.1	2418607	2418607				29	6.39	2258.92	1783	3227	14433.6	1120426	1120426
	30	89.441	587.295	25	4773	52528.6	4077592		4077592	2553655		6	311.995	437.906	4	4916	136625	10605647		10605647	5894534		4	117.46	1176.48	242	6306	138190	10727176		10727176	8308569		30	127.534	505.303	7	3227	64443.5	5002502		5002502	3882076
	31	7.691	2017.68	1183	4085	15517.4	1204554	1204554				7	20.779	3169.24	1500	6259	65853.8	5111982	5111982				5	6.312	4528.21	3036	6931	28583.4	2218823	2218823				31	5.887	1950.79	1421	2758	11484.7	891510	891510
	32	119.921	426.763	0	4085	51177.8	3972739		3972739	2768185		8	218.393	686.127	33	6259	149845	11631903		11631903	6519921		6	89.738	1018.95	0	6931	91438.5	7098022		7098022	4879199		32	106.472	481.199	44	2758	51234.1	3977108		3977108	3085598
	33	6.776	1780.66	1046	3600	12065.9	936628	936628				9	14.815	1445.26	943	2113	21411	1662051	1662051				7	7.613	4694.01	2771	7419	35737.4	2774161	2774161				33	6.621	1591.14	1173	2374	10535.7	817845	817845
	34	101.358	409.034	0	3600	41458.7	3218281		3218281	2281653		10	285.896	276.936	0	2113	79174.8	6146041		6146041	4483990		8	99.76	755.147	0	7419	75333.6	5847862		5847862	3073701		34	95.689	438.64	21	2374	41973.1	3258215		3258215	2440370
	35	9.327	1159.65	723	2279	10815.8	839589	839589				11	28.496	2118.69	1023	4709	60373.1	4686534	4686534				9	6.995	4529.04	2762	6604	31680.9	2459270	2459270				35	4.728	1508.22	1092	2352	7130.56	553518	553518
	36	131.399	288.944	0	2279	37967	2947233		2947233	2107644		12	319.377	447.654	14	4709	142970	11098246		11098246	6411712		10	76.353	989.285	0	6604	75535	5863491		5863491	3404221		36	99.953	352.891	21	2352	35272.6	2738079		2738079	2184561
	37	7.974	1745.56	1183	2947	13919.3	1080502	1080502				13	21.526	2560.34	958	5688	55114.4	4278319	4278319				11	11.749	3585.14	2639	5960	42120.5	3269651	3269651				37	4.625	1340.58	1092	1821	6199.83	481269	481269
	38	123.824	399.079	0	2947	49415.6	3835948		3835948	2755446		14	243.011	510.714	30	5688	124109	9634115		9634115	5355796		12	90.408	1263.64	7	5960	114242	8868209		8868209	5598558		38	73.983	414.016	32	1821	30630	2377692		2377692	1896423
	39	8.953	2105.5	1184	4028	18850.9	1463320	1463320				15	10.834	1742.64	958	3435	18879.7	1465557	1465557				13	15.768	4231.4	2598	7034	66720.3	5179240	5179240				39	12.096	1836.44	1044	3223	22214.3	1724414	1724414
	40	109.435	439.757	0	4028	48124.6	3735733		3735733	2272413		16	151.186	375.731	26	3435	56805.4	4409584		4409584	2944027		14	155.386	1192.48	0	7034	185295	14383716		14383716	9204476		40	141.975	478.199	23	3223	67892.4	5270226		5270226	3545812
	41	5.552	1614.04	1128	2711	8961.56	695652	695652				17	16.451	2488.88	959	5861	40943.6	3178298	3178298				15	9.159	4205.98	3203	6032	38523.8	2990454	2990454				41	8.773	1730.11	1165	2868	15178	1178207	1178207
	42	75.451	483.388	32	2711	36472.2	2831201		2831201	2135549		18	212.982	391.448	1	5861	83371.4	6471805		6471805	3293507		16	108.224	1565.53	340	6032	169428	13152031		13152031	10161577		42	75.967	576.936	20	2868	43827.8	3402189		3402189	2223982
	43	13.307	1956.28	1129	3822	26033	2020840	2020840				19	19.452	2093.1	862	5509	40715.4	3160584	3160584				17	7.832	4180.32	3201	6417	32741.9	2541632	2541632				43	9.971	2408.82	1603	3302	24018	1864425	1864425
	44	86.26	684.791	27	3822	59069.8	4585361		4585361	2564521		20	225.749	435.553	12	5509	98325.5	7632631		7632631	4472047		18	116.108	1063.17	0	6417	123442	9582332		9582332	7040700		44	115.927	615.172	23	3302	71315.3	5535933		5535933	3671508
	45	14.196	2680.93	1073	6315	38059	2954379	2954379				21	14.763	1583.14	862	3077	23372	1814282	1814282				19	4.328	4751.39	3589	6657	20566.1	1596468	1596468				45	8.064	1897.44	1201	3185	15301.5	1187800	1187800
	46	134.401	641.379	36	6315	86201.7	6691506		6691506	3737127		22	223.185	306.081	0	3077	68312.6	5302850		5302850	3488568		20	69.654	1304.26	60	6657	90847.5	7052144		7052144	5455676		46	107.502	492.345	23	3185	52928.3	4108621		4108621	2920821
	47	11.362	2249.31	1073	4854	25557	1983892	1983892				23	16.914	3137.52	1788	5623	53069.2	4119559	4119559				21	8.708	4524.27	3258	6515	39399.1	3058405	3058405				47	5.668	1594.76	1201	2198	9039.4	701694	701694
	48	121.596	460.695	30	4854	56018.4	4348498		4348498	2364606		24	243.655	601.389	20	5623	146531	11374667		11374667	7255108		22	87.741	1265.76	0	6515	111059	8621077		8621077	5562672		48	143.444	347.949	0	2198	49911.2	3874416		3874416	3172722
	49	5.398	1728.16	1081	3379	9328.01	724098	724098				25	10.86	2637.94	1470	4157	28647.4	2223787	2223787				23	11.968	4370.43	2928	9041	52303.6	4060129	4060129				49	6.467	1543.34	1092	2470	9980.6	774756	774756
	50	75.876	457.387	9	3379	34704.9	2694011		2694011	1969913		26	127.393	568.823	49	4157	72463.8	5625091		5625091	3401304		24	65.042	1839.72	92	9041	119660	9288741		9288741	5228612		50	170.947	314.63	0	2470	53785.1	4175134		4175134	3400378
	51	4.676	1572.14	1073	2435	7351.74	570688	570688				27	14.531	2528.86	1469	4166	36747.2	2852548	2852548				1	8.837	2698.2	1863	4093	23844.6	1850968	1850968				51	12.457	3658.5	1710	9279	45574.5	3537772	3537772
	52	94.414	333.595	14	2435	31496.1	2444919		2444919	1874231		28	208.242	487.748	3	4166	101569	7884446		7884446	5031898		2	82.82	984.151	178	4093	81507.3	6327105		6327105	4476137		52	117.744	814.986	36	9279	95959.5	7448969		7448969	3911197
	53	10.125	1841.09	1074	3641	18641.9	1447098	1447098				29	12.431	2060.87	1150	3629	25619.5	1988743	1988743				3	11.323	2651.5	1694	4884	30024.2	2330666	2330666				53	6.776	1435.43	1055	2064	9726.59	755038	755038
	54	100.43	497.284	0	3641	49942.3	3876827		3876827	2429729		30	187.063	356.428	0	3629	66674.5	5175690		5175690	3186947		4	97.506	961.3	156	4884	93732.3	7276079		7276079	4945413		54	98.871	383.947	16	2064	37961.4	2946796		2946796	2191758
	55	10.705	2163.79	1076	5734	23163.7	1798108	1798108				31	12.612	2028.33	1150	3392	25580.7	1985733	1985733				5	10.357	4184.39	2861	6552	43339.1	3364251	3364251				55	6.377	1236.29	873	1946	7883.45	611962	611962
	56	124.713	436.819	0	5734	54477.1	4228847		4228847	2430739		32	298.842	278.821	0	3392	83323.5	6468085		6468085	4482352		6	84.366	1445.2	181	6552	121925	9464602		9464602	6100351		56	87.251	373.906	37	1946	32623.8	2532464		2532464	1920502
	57	9.739	2476.81	1595	4170	24121.6	1872469	1872469				33	11.027	3171.39	1660	6148	34971.6	2714711	2714711				7	13.385	2257.38	1639	3673	30214.2	2345417	2345417				57	3.44	1146.21	875	1832	3942.45	306037	306037
	58	120.23	506.936	0	4170	60948.9	4731230		4731230	2858761		34	335.389	349.79	0	6148	117316	9106784		9106784	6392073		8	90.936	1009.37	212	3673	91787.5	7125111		7125111	4779694		58	78.131	290.944	1	1832	22731.7	1764578		1764578	1458541
	59	5.578	2548.48	1599	4469	14215.4	1103490	1103490				35	6.905	2177.66	1405	3682	15036.5	1167226	1167226				9	10.28	2706.65	2027	4466	27824.4	2159904	2159904				59	3.684	1051.4	871	1477	3873.7	300701	300701
	60	104.771	446.118	0	4469	46740.3	3628275		3628275	2524785		36	148.88	440.379	10	3682	65563.7	5089464		5089464	3922238		10	94.788	1157.58	164	4466	109724	8517461		8517461	6357557		60	87.689	320.34	0	1477	28090.5	2180557		2180557	1879856
	61	8.502	2424.02	1598	3816	20609.7	1599852	1599852				37	17.069	3077.02	1405	6548	52521.6	4077053	4077053				11	13.359	3248.5	2028	5649	43396.4	3368696	3368696				61	7.82	1632.79	1114	2693	12767.6	991103	991103
	62	131.695	487.603	0	3816	64215	4984769		4984769	3384917		38	285.277	459.197	0	6548	130998	10168910		10168910	6091857		12	78.53	1405.85	289	5649	110402	8570062		8570062	5201366		62	95.586	515.197	39	2693	49245.8	3822763		3822763	2831660
	63	15.111	1809.44	991	3794	27342.2	2122469	2122469				39	6.66	2275.41	1412	3197	15154.5	1176387	1176387				13	12.264	2410.11	1805	3550	29557.3	2294421	2294421				63	7.613	1860.25	1383	2816	14162.9	1099409	1099409
	64	132.095	460.397	0	3794	60816	4720915		4720915	2598446		40	199.546	295.978	0	3197	59061.2	4584698		4584698	3408311		14	88.334	1059.37	203	3550	93578.1	7264108		7264108	4969687		64	76.881	663.222	39	2816	50989.4	3958111		3958111	2858702
	65	6.055	1579.82	992	2963	9565.28	742516	742516				41	15.484	3802.36	2142	8141	58877.6	4570443	4570443				15	8.348	2715.37	1972	3856	22667.1	1759559	1759559				65	9.675	1739.68	1274	2387	16830.7	1306503	1306503
	66	161.479	229.251	0	2963	37019.2	2873663		2873663	2131147		42	211.861	755.355	74	8141	160031	12422572		12422572	7852129		16	69.951	1111.91	153	3856	77779.2	6037700		6037700	4278141		66	111.599	458.891	17	2387	51211.7	3975372		3975372	2668869
	67	12.328	2345.07	1211	4762	28910.7	2244228	2244228				43	9.494	1672.53	1024	2633	15879.3	1232652	1232652				17	7.343	2958.57	1972	4641	21724.4	1686386	1686386				67	5.411	1515.17	1169	2304	8197.92	636373	636373
	68	136.938	515.134	0	4762	70541.6	5475877		5475877	3231649		44	138.587	331.096	2	2633	45885.6	3561928		3561928	2329276		18	85.937	848.575	163	4641	72924.4	5660841		5660841	3974455		68	90.227	423.923	19	2304	38249.5	2969160		2969160	2332787
	69	9.636	2793.24	1458	5173	26915.4	2089341	2089341				1	14.608	3320.63	1627	9186	48509.3	3765591	3765591				19	7.575	3285.54	2060	5362	24887.2	1931898	1931898				69	10.383	1277.25	960	1847	13261.8	1029466	1029466
	70	126.091	567.097	0	5173	71506.1	5550746		5550746	3461405		2	134.864	806.037	10	9186	108706	8438401		8438401	4672810		20	70.801	1012.02	149	5362	71651.6	5562041		5562041	3630143		70	128.204	409.785	8	1847	52536.2	4078182		4078182	3048716
	1	7.266	2252.84	1467	3759	16368.2	1270599	1270599				3	8.824	3280.11	2543	4405	28944.8	2246873	2246873				21	10.048	3796.93	2284	5986	38152.1	2961604	2961604				1	12.702	2365.04	1631	3442	30040.5	2331932	2331932
	2	120.024	455.348	0	3759	54652.6	4242474		4242474	2971875		4	112.926	970.618	81	4405	109608	8508441		8508441	6261568		22	79.239	1327.33	242	5986	105176	8164386		8164386	5202782		2	109.151	680.878	31	3442	74318.7	5769079		5769079	3437147
	3	10.216	2261.63	1470	4383	23104	1793476	1793476				5	7.291	3630.91	2543	5784	26474.3	2055098	2055098				23	11.439	2351.91	1777	3471	26904.6	2088499	2088499				3	11.22	2443.27	1623	3455	27414.5	2128087	2128087
	4	111.431	601.945	2	4383	67075.6	5206820		5206820	3413344		6	94.775	944.803	68	5784	89543.4	6950913		6950913	4895815		24	80.14	1102.29	199	3471	88338.3	6857369		6857369	4768870		4	132.893	550.641	22	3455	73176.4	5680408		5680408	3552321
	5	7.163	2205.9	1472	3809	15799.8	1226478	1226478				7	14.84	2777.83	1586	4874	41223.9	3200056	3200056				25	13.565	2708.42	1890	4519	36739.8	2851967	2851967				5	7.317	1838.07	1460	2325	13449.4	1044025	1044025
	6	115.721	477.313	17	3809	55235.2	4287700		4287700	3061222		8	196.364	590.998	13	4874	116051	9008582		9008582	5808526		26	78.169	1324.08	347	4519	103503	8034525		8034525	5182558		6	98.833	619.901	60	2325	61266.4	4755877		4755877	3711852
	7	14.982	2343.97	1467	4634	35117.6	2726043	2726043				9	11.233	2482.99	1586	4577	27892.2	2165166	2165166				27	9.018	3798.96	2501	6226	34257.4	2659270	2659270				7	7.716	2282.83	1583	3594	17615.4	1367414	1367414
	8	155.811	614.22	0	4634	95702.1	7428988		7428988	4702945		10	130.407	665.818	58	4577	86827.3	6740073		6740073	4574907		28	70.852	1319.24	100	6226	93471.5	7255838		7255838	4596568		8	115.013	552.629	15	3594	63559.3	4933868		4933868	3566454
	9	15.253	2657.59	1467	4865	40535.1	3146584	3146584				11	28.508	1806.99	1190	4154	51514.6	3998879	3998879				29	10.795	4473.9	2834	7082	48297.2	3749127	3749127				9	10.937	1781.42	1178	2718	19483.5	1512429	1512429
	10	121.492	856.331	81	4865	104038	8076060		8076060	4929476		12	223.559	682.339	49	4154	152543	11841308		11841308	7842429		30	80.475	1512.15	169	7082	121691	9446419		9446419	5697292		10	191.495	475.261	46	2718	91009.9	7064755		7064755	5552326
	11	11.027	1936.36	1395	2964	21352.7	1657527	1657527				13	11.517	2493.55	1461	4353	28717.6	2229237	2229237				31	10.19	2582.86	1890	4394	26319	2043044	2043044				11	7.884	1179.99	898	1835	9302.97	722154	722154
	12	129.467	613.524	16	2964	79430.9	6165915		6165915	4508388		14	194.148	454.708	5	4353	88280.9	6852908		6852908	4623671		32	92.391	1027.83	178	4394	94962.9	7371611		7371611	5328567		12	118.195	352.448	0	1835	41657.4	3233708		3233708	2511554
	13	8.425	2009.91	1395	3224	16933.5	1314480	1314480				15	27.839	5311	2961	10630	147851	11477080					1	5.449	3614.72	2249	5720	19697.3	1529026	1529026				13	14.222	2202.27	1357	4392	31320.7	2431309	2431309
	14	135.663	464.193	20	3224	62973.8	4888417		4888417	3573937		16	598.445	692.449	0	10630	414392	32167707					2	95.767	1045.57	176	5720	100130	7772731		7772731	6243705		14	116.417	747.486	44	4392	87020	6755030		6755030	4323721
	15	10.435	2321.06	1646	3908	24219.4	1880058	1880058				17	7.613	2883.16	1837	5281	21950.7	1703948	1703948				3	9.224	3426.27	1909	7253	31602.9	2453209	2453209				15	6.506	1725.77	1357	2620	11227.1	871514	871514
	16	131.824	566.12	0	3908	74628.2	5793105		5793105	3913047		18	173.24	458.808	6	5281	79484.1	6170047		6170047	4466099		4	100.482	1010.76	191	7253	101563	7883934		7883934	5430725		16	184.152	298.248	0	2620	54922.8	4263450		4263450	3391936
	17	9.791	2487.99	1646	3737	24358.7	1890874	1890874				19	7.098	2635.62	2037	3650	18707.9	1452226	1452226				5	7.433	2862.11	1907	4649	21274.2	1651435	1651435				17	14.57	2287.17	1556	3751	33323.6	2586785	2586785
	18	109.113	713.293	50	3737	77829.3	6041590		6041590	4150716		20	153.067	557.74	15	3650	85371.5	6627068		6627068	5174842		6	97.815	899.442	210	4649	87978.9	6829465		6829465	5178030		18	124.533	740.702	75	3751	92241.6	7160363		7160363	4573578
	19	10.022	2023.92	1252	3403	20284.6	1574614	1574614				21	12.599	3601.41	2209	5970	45373.6	3522182	3522182				7	7.948	2990.45	2080	4973	23769.1	1845106	1845106				19	8.232	2635.97	2223	3369	21698.6	1684383	1684383
	20	147.888	460.042	18	3403	68034.8	5281280		5281280	3706666		22	133.782	860.001	28	5970	115053	8931115		8931115	5408933		8	88.681	991.841	139	4973	87957.9	6827836		6827836	4982730		20	96.346	1098.12	126	3369	105800	8212821		8212821	6528438
	21	5.501	1813.27	1253	3157	9974.31	774268	774268				23	16.309	3459.68	1709	6270	56423.6	4379949	4379949				9	9.778	3291.86	2025	5469	32186.6	2498523	2498523				21	6.39	2018.96	1414	2960	12900.3	1001403	1001403
	22	98.343	370.928	0	3157	36478.2	2831661		2831661	2057393		24	172.48	720.655	37	6270	124299	9648853		9648853	5268904		10	79.213	1133.42	188	5469	89781.5	6969396		6969396	4470873		22	86.414	547.931	34	2960	47349	3675522		3675522	2674119
	23	11.414	3004.05	2077	5015	34287.2	2661584	2661584				25	14.57	2742.39	1616	4886	39956.2	3101646	3101646				11	6.815	3638.52	2936	5040	24795.4	1924776	1924776				23	9.327	2048.38	1245	3448	19104.7	1483027	1483027
	24	115.605	830.143	33	5015	95969	7449705		7449705	4788121		26	136.745	802.26	45	4886	109705	8515991		8515991	5414345		12	62.067	1542.05	358	5040	95709.7	7429576		7429576	5504800		24	161.105	354.869	0	3448	57171.3	4437990		4437990	2954963
	25	20.135	4320.71	2184	9121	86997.3	6753270																13	2.795	1445.62	996	2426	4041.16	313700	313700				25	12.805	1657.52	1046	2988	21224.5	1647576	1647576
	26	180.377	984.948	0	9121	177662	13791239																14	50.035	556.848	94	2426	27861.7	2162798		2162798	1849098		26	191.082	339.7	1	2988	64910.7	5038768		5038768	3391192
	27	7.974	2339.74	1646	3654	18657.4	1448301	1448301															15	2.834	1144.11	997	1579	3242.5	251703	251703				27	11.22	1582.78	956	2867	17759.4	1378598	1378598
	28	78.388	767.549	50	3654	60167	4670538		4670538	3222237													16	53.255	504.59	122	1579	26872.1	2085977		2085977	1834274		28	101.628	515.04	45	2867	52342.5	4063151		4063151	2684553
	29	7.369	2693.61	1649	4932	19848.3	1540748	1540748															17	10.113	2178.71	1667	3056	22032.3	1710285	1710285				29	10.873	2227.88	1645	3467	24222.8	1880327	1880327
	30	128.32	476.592	0	4932	61156.3	4747334		4747334	3206586													18	75.876	881.401	163	3056	66877.6	5191453		5191453	3481168		30	102.208	921.268	133	3467	94160.8	7309344		7309344	5429017
	31	16.36	3089.93	1788	6189	50552.7	3924214	3924214															19	21.99	2657.27	1667	5576	58433.4	4535963	4535963				31	9.687	2281.62	1447	3707	22103.1	1715782	1715782
	32	115.373	924.21	11	6189	106629	8277226		8277226	4353012													20	103.702	956.488	107	5576	99189.8	7699730		7699730	3163767		32	176.294	398.519	8	3707	70256.3	5453727		5453727	3737945
	33	12.625	2741.07	1788	4487	34605	2686252	2686252															21	7.91	3556.07	2190	5600	28127.5	2183428	2183428				33	11.607	2759.87	1691	4555	32033.5	2486639	2486639
	34	127.418	732.775	11	4487	93369	7247876		7247876	4561624													22	58.331	1460.48	288	5600	85191.2	6613071		6613071	4429643		34	118.581	709.773	0	4555	84165.6	6533456		6533456	4046817
	35	8.309	2395.44	1538	4054	19903.8	1545060	1545060															23	9.945	4054.39	2473	6150	40321.3	3129987	3129987				35	11.787	1416.89	1023	2298	16701.3	1296459	1296459
	36	85.126	715.347	23	4054	60894.5	4727011		4727011	3181951													24	69.126	1402.1	239	6150	96921.4	7523642		7523642	4393655		36	110.903	492.762	11	2298	54649	4242191		4242191	2945732
	37	10.821	2254.65	1360	4147	24397.8	1893905	1893905																										37	7.845	1443.64	1022	2172	11325.8	879178	879178
	38	153.106	467.269	0	4147	71541.6	5553498		5553498	3659593																								38	174.825	292.105	0	2172	51067.3	3964159		3964159	3084981
	39	6.196	2186.09	1539	3679	13545.8	1051510	1051510																										39	6.016	1427.85	1024	2238	8589.97	666807	666807
	40	99.155	545.818	33	3679	54120.4	4201161		4201161	3149651																								40	91.284	422.772	9	2238	38592.1	2995761		2995761	2328954
	41	7.613	2255.6	1647	3256	17172.8	1333061	1333061																										41	6.441	1354.17	1024	2140	8722.4	677087	677087
	42	93.59	620.639	24	3256	58085.3	4508943		4508943	3175882																								42	137.247	314.67	10	2140	43187.7	3352498		3352498	2675411
	43	5.398	1893.21	1244	3405	10218.9	793254	793254																										43	6.068	1161.26	911	1732	7045.96	546951	546951
	44	81.416	538.093	27	3405	43809.3	3400748		3400748	2607494																								44	123.206	325.876	7	1732	40149.8	3116678		3116678	2569727
	45	14.943	2754.35	1681	5048	41159.3	3195043	3195043																										45	9.507	1437.9	814	2749	13670.3	1061174	1061174
	46	112.964	830.427	20	5048	93808.7	7282012		7282012	4086969																								46	102.594	390.895	19	2749	40103.6	3113089		3113089	2051915
	47	4.754	1730.76	1289	2529	8227.24	638649	638649																										47	5.256	1092.89	848	1897	5744.17	445898	445898
	48	99.155	339.416	0	2529	33654.7	2612485		2612485	1973836																								48	114.768	280.139	0	1897	32151	2495761		2495761	2049863
	49	8.876	2975.47	1575	6484	26409.9	2050099	2050099																										1	10.087	1693.73	1311	2615	17084.3	1326190	1326190
	50	123.438	495.787	0	6484	61198.9	4750634		4750634	2700535																								2	153.518	492.733	17	2615	75643.2	5871897		5871897	4545707
	51	5.101	3105.28	2010	5008	15841.2	1229690	1229690																										3	13.307	1677.66	1243	2432	22325.2	1733021	1733021
	52	81.48	592.315	0	5008	48262	3746393		3746393	2516703																								4	178.587	457.457	29	2432	81695.7	6341724		6341724	4608703
	53	8.696	2619.83	2060	3775	22780.8	1768386	1768386																										5	11.491	1459.97	1063	2093	16776.4	1302290	1302290
	54	113.338	667.396	0	3775	75641.4	5871753		5871753	4103367																								6	145.466	416.441	18	2093	60578.2	4702453		4702453	3400163
	55	8	1950.29	1485	3134	15602	1211127	1211127																										7	7.742	1200.82	817	2102	9297.04	721694	721694
	56	132.803	467.588	0	3134	62097.1	4820360		4820360	3609233																								8	114.446	319.937	11	2102	36615.5	2842321		2842321	2120627
	57	5.024	2484.43	1540	4459	12482	968927	968927																										9	15.832	1319.3	857	2068	20887.6	1621425	1621425
	58	97.338	456.474	0	4459	44432.4	3449116		3449116	2480189																								10	164.996	399.167	0	2068	65860.9	5112529		5112529	3491104
	59	9.185	2330.35	1467	3612	21404.4	1661542	1661542																										11	7.163	1128.26	792	1640	8081.18	627311	627311
	60	133.821	439.91	0	3612	58869.1	4569782		4569782	2908240																								12	129.299	292.521	0	1640	37822.7	2936034		2936034	2308723
	61	10.332	2234.13	1398	4470	23082	1791769	1791769																										13	9.752	1427.02	1054	1996	13916.1	1080252	1080252
	62	114.42	532.366	0	4470	60913.4	4728479		4728479	2936710																								14	127.38	414.789	59	1996	52835.7	4101437		4101437	3021185
	63	7.935	1853.16	1395	2573	14705.7	1141548	1141548																										15	11.169	1232.49	890	1883	13765.6	1068573	1068573
	64	169.595	334.097	0	2573	56661.2	4398390		4398390	3256842																								16	146.368	357.535	0	1883	52331.7	4062309		4062309	2993736
	65	9.365	2414.02	1538	4939	22608.3	1754995	1754995																										17	4.908	1126.12	907	1594	5527.17	429053	429053
	66	118.723	615.354	0	4939	73056.6	5671105		5671105	3916110																								18	151.457	275.035	4	1594	41655.9	3233586		3233586	2804533
	67	5.81	1766.58	1360	2677	10263.6	796728	796728																										19	7.446	1212.9	927	1807	9031.18	701056	701056
	68	82.781	523.943	9	2677	43372.7	3366858		3366858	2570130																								20	121.866	354.339	0	1807	43181.9	3352047		3352047	2650991
	69	5.578	1700.6	1359	2521	9485.95	736358	736358																										21	11.62	1352.96	883	2372	15721.1	1220373	1220373
	70	88.218	477.862	0	2521	42155.9	3272402		3272402	2536044																								22	130.781	403.297	0	2372	52743.5	4094274		4094274	2873901
	1	12.148	2034.84	1133	4238	24719.2	1918856	1918856																										23	15.575	1538.46	1027	2539	23960.9	1859993	1859993
	2	100.366	582.716	54	4238	58484.7	4539943		4539943	2621087																								24	168.088	461.455	17	2539	77564.9	6021069		6021069	4161076
	3	6.905	1778.35	1133	3124	12279.3	953197	953197																										25	14.261	1158.78	791	1880	16524.9	1282767	1282767
	4	88.913	493.505	40	3124	43879.1	3406169		3406169	2452972																								26	156.172	340.358	0	1880	53154.3	4126163		4126163	2843396
	5	8.696	2140.26	1131	4475	18610.7	1444677	1444677																										27	14.196	1148.22	837	1604	16300.3	1265334	1265334
	6	96.552	559.155	38	4475	53987.8	4190867		4190867	2746190																								28	149.782	383.614	8	1604	57458.5	4460285		4460285	3194951
	7	10.357	2339.32	1370	4140	24229.1	1880809	1880809																										29	11.336	910.268	678	1393	10319.1	801036	801036
	8	124.739	532.473	57	4140	66420.1	5155936		5155936	3275127																								30	208.615	257.44	4	1393	53705.8	4168980		4168980	3367944
AVEC NUCLEOLE							SANS NUCLEOLE										siMock	siXAB2	siAQR	siCCDC16
	siMock	siXAB2	siAQR	siCCDC16				siMock	siXAB2	siAQR	siCCDC16					Average	1.63641e+06	2.86315e+06	2522697	1.14575e+06
Average	4.68019e+06	7.70234e+06	7.53433e+06	4.21229e+06			Average	3.04378e+06	4.83919e+06	5.01163e+06	3.06653e+06					SD	723977	1.15462e+06	1.11288e+06	592148
SD	1.35682e+06	2.24063e+06	2.37432e+06	1.38466e+06			SD	749449	1.30913e+06	1.59078e+06	915953					SEM	84735	170240	154328	68835.8
SEM	158804	330363	329259	160964			SEM	87716.4	193020	220601	106477
																Percentage	100	174.965	154.16	70.0163
Percentage	100	164.573	160.984	90.0026			Percentage	100	158.986	164.652	100.748					SD	44.2418	70.5582	68.0073	36.1858
SD	28.9907	47.8748	50.7313	29.5857			SD	24.6223	43.0099	52.2634	30.0926					SEM	5.17811	10.4032	9.43091	4.20652
SEM	3.39311	7.05875	7.03516	3.43926			SEM	2.88183	6.34146	7.24762	3.4982

## Sheet: p-value
	siMokc	siXAB2	siAQR	siZNF830
	2579727	5189086	6658749	3217452
	3613852	6051344	6895215	2866285
	3112131	3745786	4613476	2638909
	3322994	4103724	3191125	3989532
	3562122	3035849	5942668	2678769
	2690524	3170559	3567568	2104907
	2601740	3095438	2678295	2586168
	1908053	4093928	3124972	2543133
	2949691	5803766	4386088	2790387
	2036234	5229632	6448628	2448060
	3781880	5771992	4978292	1329701
	2473214	4363466	3891293	3274709
	2516694	4008528	5858633	2458832
	3024882	4309056		2308608
	2553655	5894534	8308569	3882076
	2768185	6519921	4879199	3085598
	2281653	4483990	3073701	2440370
	2107644	6411712	3404221	2184561
	2755446	5355796	5598558	1896423
	2272413	2944027	9204476	3545812
	2135549	3293507	10161577	2223982
	2564521	4472047	7040700	3671508
	3737127	3488568	5455676	2920821
	2364606	7255108	5562672	3172722
	1969913	3401304	5228612	3400378
	1874231	5031898	4476137	3911197
	2429729	3186947	4945413	2191758
	2430739	4482352	6100351	1920502
	2858761	6392073	4779694	1458541
	2524785	3922238	6357557	1879856
	3384917	6091857	5201366	2831660
	2598446	3408311	4969687	2858702
	2131147	7852129	4278141	2668869
	3231649	2329276	3974455	2332787
	3461405	4672810	3630143	3048716
	2971875	6261568	5202782	3437147
	3413344	4895815	4768870	3552321
	3061222	5808526	5182558	3711852
	4702945	4574907	4596568	3566454
	4929476	7842429	5697292	5552326
	4508388	4623671	5328567	2511554
	3573937		6243705	4323721
	3913047	4466099	5430725	3391936
	4150716	5174842	5178030	4573578
	3706666	5408933	4982730	6528438
	2057393	5268904	4470873	2674119
	4788121	5414345	5504800	2954963
			1849098	3391192
	3222237		1834274	2684553
	3206586		3481168	5429017
	4353012		3163767	3737945
	4561624		4429643	4046817
	3181951		4393655	2945732
	3659593			3084981
	3149651			2328954
	3175882			2675411
	2607494			2569727
	4086969			2051915
	1973836			2049863
	2700535			4545707
	2516703			4608703
	4103367			3400163
	3609233			2120627
	2480189			3491104
	2908240			2308723
	2936710			3021185
	3256842			2993736
	3916110			2804533
	2570130			2650991
	2536044			2873901
	2621087			4161076
	2452972			2843396
	2746190			3194951
	3275127			3367944
Variance	5.61674e+11	1.71381e+12	2.53058e+12	8.3897e+11
p-value		4.94094e-12	7.08942e-12	0.86921
