# Supplementary material for: XAB2 dynamics during DNA damage-dependent transcription inhibition
Source: eLife. 2022 Jul 26;11:e77094. doi: 10.7554/eLife.77094 (PMC9436415; doi:10.7554/eLife.77094)
Supplement: Figure 5—source data 2. [file elife-77094-fig5-data2.xlsx]

## Sheet: IF R-loops
		noUV											1h											2h											4h											16h
		Area	Mean	Min	Max	IntDen	RawIntDen	NUCLEOLI	NUCLEI	NUCLEI-NUCLEOLI			Area	Mean	Min	Max	IntDen	RawIntDen	NUCLEOLI	NUCLEI	NUCLEI-NUCLEOLI			Area	Mean	Min	Max	IntDen	RawIntDen	NUCLEOLI	NUCLEI	NUCLEI-NUCLEOLI			Area	Mean	Min	Max	IntDen	RawIntDen	NUCLEOLI	NUCLEI	NUCLEI-NUCLEOLI			Area	Mean	Min	Max
	1	1282	3512	2154	5476	4502384	4502384	4502384				1	1277	1152.65	716	1916	1471930	1471930	1471930				1	1172	2831.18	1812	4655	3318137	3318137	3318137				1	901	1687.8	914	3167	1520706	1520706	1520706				1	692	3018.87	2209	4246
	2	14543	1008.11	162	5476	14660906	14660906		14660906	10158522		2	7586	560.021	153	1916	4248323	4248323		4248323	2776393		2	12182	1091.24	226	4655	13293470	13293470		13293470	9975333		2	10638	486.053	163	3167	5170635	5170635		5170635	3649929		2	7942	1099.97	129	4246
	3	1093	2990.41	2153	4448	3268519	3268519	3268519				3	1069	979.062	722	1500	1046617	1046617	1046617				3	614	2600.74	1841	3652	1596854	1596854	1596854				3	892	1312.57	889	2377	1170810	1170810	1170810				3	739	3325.76	2211	4909
	4	15724	844.93	126	4448	13285686	13285686		13285686	10017167		4	6925	522.476	156	1500	3618144	3618144		3618144	2571527		4	12083	864.481	141	3652	10445523	10445523		10445523	8848669		4	12256	497.37	95	2377	6095770	6095770		6095770	4924960		4	10219	1051.69	141	4909
	5	708	2993.89	2155	4236	2119671	2119671	2119671				5	1129	1091.2	722	1740	1231961	1231961	1231961				5	391	2528.37	1840	3501	988594	988594	988594				5	522	1474.3	912	2603	769585	769585	769585				5	938	3110.91	2299	4858
	6	13891	760.182	203	4236	10559682	10559682		10559682	8440011		6	7907	582.284	192	1740	4604117	4604117		4604117	3372156		6	9085	801.284	111	3501	7279663	7279663		7279663	6291069		6	11652	400.664	98	2603	4668535	4668535		4668535	3898950		6	7081	1487.38	199	4858
	7	1359	3510.57	2155	5472	4770864	4770864	4770864				7	705	1054.68	764	1808	743553	743553	743553				7	447	1768.81	1335	2562	790656	790656	790656				7	650	1367.02	912	2540	888564	888564	888564				7	601	3417.69	2305	4882
	8	12504	1195.59	196	5472	14949597	14949597		14949597	10178733		8	8335	476.975	195	1808	3975586	3975586		3975586	3232033		8	6963	694.579	101	2562	4836356	4836356		4836356	4045700		8	11692	358.154	102	2540	4187537	4187537		4187537	3298973		8	7247	1304.38	211	4882
	9	1211	3420.18	2153	5429	4141837	4141837	4141837				9	914	1025.74	749	1750	937528	937528	937528				9	1005	2245.19	1428	3584	2256416	2256416	2256416				9	513	1445.97	912	2750	741782	741782	741782				9	731	3584.3	2300	5888
	10	9427	1342.41	176	5429	12654936	12654936		12654936	8513099		10	7209	563.131	163	1750	4059612	4059612		4059612	3122084		10	15548	688.609	114	3584	10706496	10706496		10706496	8450080		10	12547	355.338	105	2750	4458431	4458431		4458431	3716649		10	9505	1082.4	253	5888
	11	934	3175.23	2157	4800	2965663	2965663	2965663				11	845	1560.59	1097	2301	1318695	1318695	1318695				11	675	2104.98	1428	3295	1420864	1420864	1420864				11	557	2268.32	1359	3635	1263455	1263455	1263455				11	976	4155	2301	7715
	12	8958	1087.2	205	4800	9739157	9739157		9739157	6773494		12	7790	674.854	186	2301	5257112	5257112		5257112	3938417		12	8722	727.546	91	3295	6345658	6345658		6345658	4924794		12	10422	552.831	123	3635	5761608	5761608		5761608	4498153		12	11206	1274.09	216	7715
	13	1243	3290.32	2153	5489	4089865	4089865	4089865				13	658	1466.67	1096	1979	965069	965069	965069				13	935	2213.76	1428	3921	2069870	2069870	2069870				13	700	2069.97	1360	3654	1448979	1448979	1448979				13	301	2906.03	2300	4185
	14	12006	1157.26	202	5489	13894048	13894048		13894048	9804183		14	8375	571.566	161	1979	4786868	4786868		4786868	3821799		14	11920	704.119	153	3921	8393101	8393101		8393101	6323231		14	9781	692.995	104	3654	6778188	6778188		6778188	5329209		14	8704	1219.82	177	4185
	15	889	2998.18	2155	3993	2665386	2665386	2665386				15	1031	2108.2	1234	3677	2173552	2173552	2173552				15	1084	2246.12	1428	4400	2434795	2434795	2434795				15	734	2342.78	1358	4297	1719603	1719603	1719603				15	339	2875.56	2304	3739
	16	9889	997.092	240	3993	9860245	9860245		9860245	7194859		16	8268	880.201	225	3677	7277506	7277506		7277506	5103954		16	13849	725.403	134	4400	10046105	10046105		10046105	7611310		16	14800	636.326	95	4297	9417621	9417621		9417621	7698018		16	7517	1041.34	223	3739
	17	636	2854.14	2106	3771	1815232	1815232	1815232				17	834	1401.05	1091	1940	1168476	1168476	1168476				17	1030	2266.77	1574	3539	2334775	2334775	2334775				17	498	2268.79	1579	3349	1129857	1129857	1129857				17	468	2863.82	2299	3962
	18	8610	862.538	216	3771	7426453	7426453		7426453	5611221		18	7070	672.938	182	1940	4757674	4757674		4757674	3589198		18	15712	681.453	140	3539	10706990	10706990		10706990	8372215		18	11817	602.293	27	3349	7117291	7117291		7117291	5987434		18	13651	1157.48	112	3962
	19	1518	2050.7	1255	3345	3112969	3112969	3112969				19	640	1611.83	1097	2393	1031574	1031574	1031574				19	651	2629.32	1575	4471	1711684	1711684	1711684				19	553	2849.81	1698	4501	1575947	1575947	1575947				19	791	3786.57	2663	5744
	20	13727	682.129	213	3345	9363587	9363587		9363587	6250618		20	7995	567.569	163	2393	4537714	4537714		4537714	3506140		20	9967	721.863	200	4471	7194804	7194804		7194804	5483120		20	11191	745.945	60	4501	8347866	8347866		8347866	6771919		20	8411	1272.3	195	5744
	1	2029	2256.64	1551	3643	4578733	4578733	4578733				21	435	1340.22	1096	1900	582998	582998	582998				21	549	2554.53	1574	4394	1402439	1402439	1402439				21	564	2652.83	1693	3741	1496194	1496194	1496194				21	515	4105.3	3088	6026
	2	11260	1008.63	69	3643	11357201	11357201		11357201	6778468		22	5266	728.575	224	1900	3836677	3836677		3836677	3253679		22	18203	764.963	111	4394	13924628	13924628		13924628	12522189		22	12857	758.126	95	3741	9747226	9747226		9747226	8251032		22	7103	1608.05	192	6026
	3	940	2118.09	1428	2991	1991002	1991002	1991002				23	835	1574.53	1183	2433	1314728	1314728	1314728				23	531	1982.82	1575	2784	1052876	1052876	1052876				23	640	2972.34	2010	4681	1902296	1902296	1902296				23	830	3868.08	2483	6975
	4	9787	694.692	208	2991	6798946	6798946		6798946	4807944		24	9056	675.02	187	2433	6112978	6112978		6112978	4798250		24	7585	672.214	139	2784	5098745	5098745		5098745	4045869		24	7653	986.655	138	4681	7550869	7550869		7550869	5648573		24	6965	1669.54	172	6975
	5	1062	1943.63	1426	2700	2064132	2064132	2064132				25	750	1589.21	1182	2465	1191911	1191911	1191911				25	595	2410.97	1574	4083	1434529	1434529	1434529				25	361	3081.57	2017	4406	1112448	1112448	1112448				1	1476	2741.21	1378	5358
	6	13717	587.825	96	2700	8063201	8063201		8063201	5999069		26	8316	678.169	175	2465	5639652	5639652		5639652	4447741		26	8602	780.741	82	4083	6715937	6715937		6715937	5281408		26	11398	651.228	108	4406	7422695	7422695		7422695	6310247		2	17483	784.558	163	5358
	7	1042	2605.5	1362	4648	2714927	2714927	2714927				27	1006	1847.07	1312	2647	1858151	1858151	1858151				27	963	1717.59	944	3216	1654035	1654035	1654035				27	480	2612.56	1619	4743	1254029	1254029	1254029				3	1228	1653.11	1132	2623
	8	10088	778.256	100	4648	7851043	7851043		7851043	5136116		28	8696	844.421	278	2647	7343088	7343088		7343088	5484937		28	12412	474.507	118	3216	5889579	5889579		5889579	4235544		28	10803	655.322	115	4743	7079442	7079442		7079442	5825413		4	15450	598.108	163	2623
	9	1086	2010.28	1428	2967	2183163	2183163	2183163				29	847	2229.04	1385	3362	1888000	1888000	1888000				29	790	1311.16	940	2941	1035817	1035817	1035817				29	568	2112.81	1302	3533	1200078	1200078	1200078				5	436	1941.32	1132	4343
	10	9345	788.892	109	2967	7372192	7372192		7372192	5189029		30	8722	794.365	214	3362	6928455	6928455		6928455	5040455		30	9404	562.887	78	2941	5293389	5293389		5293389	4257572		30	16506	556.907	124	3533	9192308	9192308		9192308	7992230		6	17076	533.77	97	4343
	11	1202	2228.54	1426	3517	2678706	2678706	2678706				31	630	1703.18	1198	2520	1073005	1073005	1073005				31	1033	1634.19	1186	2810	1688123	1688123	1688123				31	530	1940.4	1302	3310	1028414	1028414	1028414				7	518	2655.8	1810	4614
	12	10841	742.588	106	3517	8050394	8050394		8050394	5371688		32	8538	655.914	201	2520	5600193	5600193		5600193	4527188		32	7992	729.679	110	2810	5831591	5831591		5831591	4143468		32	12371	545.773	143	3310	6751755	6751755		6751755	5723341		8	10890	912.471	297	4614
	13	1614	2258.48	1368	4342	3645193	3645193	3645193				33	863	1650.24	1197	2490	1424156	1424156	1424156				33	708	1714.91	1156	2604	1214156	1214156	1214156				33	433	1470.88	986	2694	636892	636892	636892				9	791	3746.12	2135	5890
	14	10057	951.112	120	4342	9565329	9565329		9565329	5920136		34	11376	612.834	114	2490	6971598	6971598		6971598	5547442		34	8110	663.13	128	2604	5377985	5377985		5377985	4163829		34	9544	447.209	74	2694	4268163	4268163		4268163	3631271		10	9211	1280.82	234	5890
	15	1739	2353.81	1426	3994	4093273	4093273	4093273				35	711	1810.14	1197	2707	1287010	1287010	1287010				35	884	1710.51	1186	2922	1512089	1512089	1512089				35	736	2597.92	1618	4282	1912067	1912067	1912067				11	782	2477.14	1686	4193
	16	13852	816.807	85	3994	11314414	11314414		11314414	7221141		36	10546	575.016	140	2707	6064114	6064114		6064114	4777104		36	11261	638.758	85	2922	7193057	7193057		7193057	5680968		36	14243	756.456	154	4282	10774197	10774197		10774197	8862130		12	9493	966.782	204	4193
	17	1038	2187.84	1426	3505	2270978	2270978	2270978				37	672	1789.1	1197	2666	1202276	1202276	1202276				1	751	2187.77	1676	3099	1643018	1643018	1643018				1	592	1869.6	1247	2874	1106800	1106800	1106800				13	849	3365.08	2080	5456
	18	11791	680.252	83	3505	8020851	8020851		8020851	5749873		38	9559	669.559	228	2666	6400318	6400318		6400318	5198042		2	8778	919.302	193	3099	8069636	8069636		8069636	6426618		2	13700	589.126	118	2874	8071021	8071021		8071021	6964221		14	13510	948.341	219	5456
	19	1504	2153.32	1380	3633	3238601	3238601	3238601				39	672	1578.34	1189	2543	1060646	1060646	1060646				3	650	2423.09	1677	3620	1575005	1575005	1575005				3	831	2244.17	1244	5045	1864907	1864907	1864907				15	893	2638.92	1848	4339
	20	9001	891.749	114	3633	8026629	8026629		8026629	4788028		40	5504	880.235	203	2543	4844815	4844815		4844815	3784169		4	13765	623.561	158	3620	8583313	8583313		8583313	7008308		4	15064	562.831	208	5045	8478489	8478489		8478489	6613582		16	7013	1194.32	163	4339
	21	1349	2056.57	1174	3788	2774306	2774306	2774306				41	504	1643	1197	2498	828071	828071	828071				5	663	2255.01	1675	3435	1495073	1495073	1495073				5	880	2827.12	1247	5687	2487867	2487867	2487867				17	882	2602.92	1825	3794
	22	9276	817.642	77	3788	7584446	7584446		7584446	4810140		42	8108	615.25	217	2498	4988449	4988449		4988449	4160378		6	7752	960.618	177	3435	7446714	7446714		7446714	5951641		6	16340	656.986	204	5687	10735147	10735147		10735147	8247280		18	8311	1060.14	197	3794
	23	836	1798.21	1174	2905	1503308	1503308	1503308				1	761	2113.86	1516	3014	1608651	1608651	1608651				7	302	1607.64	1291	2119	485508	485508	485508				7	365	1964.53	1247	3425	717054	717054	717054				19	647	2399.03	1779	3180
	24	10131	555.095	150	2905	5623671	5623671		5623671	4120363		2	7835	877.627	351	3014	6876206	6876206		6876206	5267555		8	5657	668.655	165	2119	3782584	3782584		3782584	3297076		8	10877	484.013	212	3425	5264611	5264611		5264611	4547557		20	7610	958.281	221	3180
	25	1144	2214.7	1405	3700	2533619	2533619	2533619				3	573	2037.66	1515	2871	1167577	1167577	1167577				9	687	2178.05	1497	3707	1496324	1496324	1496324				9	567	2127.74	1246	3644	1206428	1206428	1206428				21	832	2660.93	1779	4496
	26	9679	850.502	66	3700	8232006	8232006		8232006	5698387		4	6782	832.986	270	2871	5649312	5649312		5649312	4481735		10	11553	643.292	177	3707	7431949	7431949		7431949	5935625		10	11315	580.493	158	3644	6568279	6568279		6568279	5361851		22	7295	1150.42	192	4496
	27	937	2379.43	1405	3999	2229527	2229527	2229527				5	1069	2601.34	1515	4637	2780836	2780836	2780836				11	423	2354.5	1857	3108	995953	995953	995953				11	862	2176.87	1247	4695	1876460	1876460	1876460				23	343	1922.81	1394	3351
	28	9900	708.551	129	3999	7014655	7014655		7014655	4785128		6	11220	819.978	315	4637	9200151	9200151		9200151	6419315		12	5499	917.671	164	3108	5046271	5046271		5046271	4050318		12	11735	626.315	250	4695	7349801	7349801		7349801	5473341		24	12387	661.989	139	3351
	29	2010	2626.7	1405	5245	5279675	5279675	5279675				7	517	2562.16	1978	3377	1324639	1324639	1324639				13	388	2269.09	1857	3066	880407	880407	880407				13	647	2224.81	1247	4648	1439453	1439453	1439453				25	341	2056.55	1432	2946
	30	10437	1077.2	141	5245	11242769	11242769		11242769	5963094		8	6289	1187.27	409	3377	7466748	7466748		7466748	6142109		14	8862	713.061	212	3066	6319144	6319144		6319144	5438737		14	14900	575.881	107	4648	8580629	8580629		8580629	7141176		26	8290	690.772	144	2946
	31	1158	2016.93	1406	3216	2335605	2335605	2335605				9	472	2499.02	1978	3807	1179536	1179536	1179536				15	870	2437.98	1946	3141	2121045	2121045	2121045				15	834	3130.85	1813	5294	2611131	2611131	2611131				27	697	2954.27	2034	4221
	32	9348	807.357	104	3216	7547169	7547169		7547169	5211564		10	6991	1115.09	329	3807	7795605	7795605		7795605	6616069		16	12392	834.042	165	3141	10335449	10335449		10335449	8214404		16	17954	733.736	219	5294	13173495	13173495		13173495	10562364		28	8769	1008.08	249	4221
	33	939	2553.45	1409	4419	2397688	2397688	2397688				11	458	2505.81	1978	3623	1147659	1147659	1147659				17	585	2460.95	1940	3390	1439656	1439656	1439656				17	401	2346.76	1678	3494	941051	941051	941051				29	913	2875.31	1848	4924
	34	10859	689.478	198	4419	7487039	7487039		7487039	5089351		12	5912	1137.65	276	3623	6725768	6725768		6725768	5578109		18	7151	1060	244	3390	7580040	7580040		7580040	6140384		18	14223	666.75	245	3494	9483189	9483189		9483189	8542138		30	8231	1220.15	280	4924
	35	1682	2104.36	1405	3335	3539528	3539528	3539528				13	624	2588.26	1978	3773	1615077	1615077	1615077				19	437	2216.52	1589	3525	968619	968619	968619				19	483	2887.6	2096	4478	1394711	1394711	1394711				31	729	2781.81	2010	4079
	36	8402	986.741	161	3335	8290597	8290597		8290597	4751069		14	6348	1222.67	349	3773	7761533	7761533		7761533	6146456		20	6442	835.955	170	3525	5385220	5385220		5385220	4416601		20	14742	832.714	184	4478	12275869	12275869		12275869	10881158		32	8683	1195.94	320	4079
	37	1218	2712.46	1740	4528	3303773	3303773	3303773				15	1146	2695.2	1825	4532	3088705	3088705	3088705				21	736	1708.41	1138	2964	1257390	1257390	1257390				21	397	2527.22	1566	4222	1003307	1003307	1003307				1	1459	2306.34	1254	5816
	38	11003	868.303	161	4528	9553939	9553939		9553939	6250166		16	10765	1032.18	215	4532	11111371	11111371		11111371	8022666		22	9787	653.047	189	2964	6391375	6391375		6391375	5133985		22	12623	595.814	187	4222	7520954	7520954		7520954	6517647		2	12153	847.189	133	5816
	39	1442	2956.91	1740	5346	4263867	4263867	4263867				17	400	2262.74	1823	3288	905097	905097	905097				23	554	2010.48	1320	3102	1113805	1113805	1113805				1	666	1791.1	1063	3159	1192875	1192875	1192875				3	435	1049.2	798	1543
	40	9261	1079.64	155	5346	9998537	9998537		9998537	5734670		18	6369	888.86	193	3288	5661149	5661149		5661149	4756052		24	8548	670.157	171	3102	5728501	5728501		5728501	4614696		2	12502	549.536	133	3159	6870296	6870296		6870296	5677421		4	11325	378.09	42	1543
	41	1206	2878.15	1740	4884	3471049	3471049	3471049				19	1248	2833.85	2056	4013	3536647	3536647	3536647				25	767	2244.89	1407	4313	1721831	1721831	1721831				3	638	2033.36	1038	3653	1297283	1297283	1297283				5	621	1229.05	729	3127
	42	11819	905.248	111	4884	10699127	10699127		10699127	7228078		20	8120	1500.23	338	4013	12181868	12181868		12181868	8645221		26	15856	569.008	157	4313	9022194	9022194		9022194	7300363		4	16720	497.506	165	3653	8318306	8318306		8318306	7021023		6	13877	423.025	87	3127
	43	1199	2941.36	1740	4712	3526695	3526695	3526695				21	809	3953.14	2620	6549	3198089	3198089	3198089				27	1115	1997.62	1317	3545	2227349	2227349	2227349				5	881	2002.8	1073	3917	1764468	1764468	1764468				7	1104	2806.11	1553	4836
	44	10275	951.31	132	4712	9774712	9774712		9774712	6248017		22	8742	1745.66	305	6549	15260525	15260525		15260525	12062436		28	15135	647.007	158	3545	9792452	9792452		9792452	7565103		6	17202	594.768	101	3917	10231199	10231199		10231199	8466731		8	10413	915.776	178	4836
	1	1480	2288.07	1450	3895	3386343	3386343	3386343				1	824	2602.63	1640	4565	2144565	2144565	2144565				29	556	1926.57	1311	2944	1071175	1071175	1071175				7	853	2421.09	1400	4293	2065194	2065194	2065194				9	322	1799.28	1379	2909
	2	6715	1265.37	280	3895	8496930	8496930		8496930	5110587		2	8413	927.06	272	4565	7799353	7799353		7799353	5654788		30	8186	721.118	206	2944	5903076	5903076		5903076	4831901		8	17633	667.547	159	4293	11770852	11770852		11770852	9705658		10	12695	597.127	96	2909
	3	988	2463.43	1504	4018	2433870	2433870	2433870				3	554	2450.03	1642	3529	1357319	1357319	1357319				31	687	1989.04	1319	3023	1366467	1366467	1366467				9	298	2328.74	1416	3767	693966	693966	693966				11	821	2180.92	1346	3847
	4	6117	1036.36	327	4018	6339414	6339414		6339414	3905544		4	8388	785.745	230	3529	6590832	6590832		6590832	5233513		32	10589	667.385	168	3023	7066940	7066940		7066940	5700473		10	9524	582.505	104	3767	5547776	5547776		5547776	4853810		12	10161	721.584	149	3847
	5	1119	2321.3	1505	3557	2597536	2597536	2597536				5	916	2627.03	1521	4615	2406364	2406364	2406364				33	555	2208.14	1591	3079	1225520	1225520	1225520				11	531	2403.76	1381	4009	1276399	1276399	1276399				13	2041	2464.03	1422	4351
	6	6661	1067.45	330	3557	7110317	7110317		7110317	4512781		6	7353	1153.07	228	4615	8478487	8478487		8478487	6072123		34	9213	738.768	177	3079	6806272	6806272		6806272	5580752		12	13691	559.211	168	4009	7656155	7656155		7656155	6379756		14	16070	1004.06	193	4351
	7	729	2167.79	1507	2962	1580316	1580316	1580316				7	878	2466.62	1564	4239	2165690	2165690	2165690				35	499	2002.37	1591	2657	999181	999181	999181				13	556	2488.09	1413	4049	1383375	1383375	1383375				15	207	1373.39	1121	1915
	8	6672	804.731	291	2962	5369165	5369165		5369165	3788849		8	11437	920.071	245	4239	10522849	10522849		10522849	8357159		36	11346	673.088	155	2657	7636860	7636860		7636860	6637679		14	14180	625.184	182	4049	8865111	8865111		8865111	7481736		16	9273	605.519	86	1915
	9	920	2116.4	1504	3385	1947088	1947088	1947088				9	801	2293.63	1564	3762	1837195	1837195	1837195				37	223	1814.05	1582	2215	404533	404533	404533				15	262	2255.37	1410	3606	590908	590908	590908				17	1031	2568.97	1597	4274
	10	6971	966.779	349	3385	6739419	6739419		6739419	4792331		10	10044	845.729	281	3762	8494500	8494500		8494500	6657305		38	7467	622.151	168	2215	4645605	4645605		4645605	4241072		16	9803	506.414	166	3606	4964380	4964380		4964380	4373472		18	11659	1003.02	134	4274
	11	1009	2597.27	1498	4665	2620645	2620645	2620645				11	815	2965.97	2087	4720	2417263	2417263	2417263				39	798	3042.36	2061	4554	2427801	2427801	2427801				17	333	1420.98	872	2784	473186	473186	473186				19	453	2914.41	2007	4699
	12	4609	1216.27	412	4665	5605798	5605798		5605798	2985153		12	6312	1302.57	289	4720	8221827	8221827		8221827	5804564		40	15695	770.016	153	4554	12085394	12085394		12085394	9657593		18	9561	421.882	166	2784	4033612	4033612		4033612	3560426		20	14236	814.766	218	4699
	13	272	2687.57	1509	4038	731020	731020					13	863	3066.07	2049	5153	2646019	2646019	2646019				41	543	3157.06	2097	5678	1714282	1714282	1714282				19	295	3149.08	1962	4661	928979	928979	928979				21	1550	2632.23	1742	4413
	14	2891	822.846	360	4038	2378848	2378848					14	10499	1075.37	213	5153	11290283	11290283		11290283	8644264		42	14939	673.455	247	5678	10060744	10060744		10060744	8346462		20	13080	619.658	157	4661	8105124	8105124		8105124	7176145		22	16048	1034.72	142	4413
	15	1179	2579.47	1506	4361	3041200	3041200	3041200				15	932	3162.3	2097	4993	2947259	2947259	2947259				43	591	3379.84	2101	4901	1997484	1997484	1997484				21	292	2679.15	1960	3640	782312	782312	782312				1	1039	3576.25	1878	7233
	16	7273	1036.7	314	4361	7539938	7539938		7539938	4498738		16	12365	1195	206	4993	14776208	14776208		14776208	11828949		44	10548	937.711	122	4901	9890977	9890977		9890977	7893493		22	5784	980.398	166	3640	5670624	5670624		5670624	4888312		2	10858	1126.61	296	7233
	17	1458	2599.99	1504	4383	3790779	3790779	3790779				17	1301	3446.52	2100	5510	4483924	4483924	4483924				45	935	3150.75	2276	5269	2945954	2945954	2945954				23	346	3323.14	1958	4555	1149806	1149806	1149806				3	1834	4543.79	2420	8782
	18	9491	1047.04	351	4383	9937426	9937426		9937426	6146647		18	12021	1257.84	250	5510	15120514	15120514		15120514	10636590		46	13490	1237.46	249	5269	16693303	16693303		16693303	13747349		24	13656	546.364	171	4555	7461147	7461147		7461147	6311341		4	13831	1625.89	230	8782
	19	1516	3236.92	1435	6190	4907172	4907172	4907172				19	844	3061.5	2241	4207	2583906	2583906	2583906				47	412	3069.15	2279	4148	1264490	1264490	1264490				1	891	1574.06	891	2958	1402487	1402487	1402487				5	884	4752.44	2635	9206
	20	8402	1330.23	330	6190	11176604	11176604		11176604	6269432		20	7037	1335.78	285	4207	9399860	9399860		9399860	6815954		48	10950	698.421	171	4148	7647715	7647715		7647715	6383225		2	11718	486.582	67	2958	5701765	5701765		5701765	4299278		6	9831	1352.15	264	9206
	21	1639	2648.35	1494	5037	4340652	4340652	4340652				21	824	2942.16	2250	4177	2424340	2424340	2424340				49	621	2640.17	1827	4096	1639547	1639547	1639547				3	928	1490.29	891	3138	1382993	1382993	1382993				7	671	2700.36	1770	4494
	22	6918	1373.24	333	5037	9500103	9500103		9500103	5159451		22	7006	1130.12	189	4177	7917652	7917652		7917652	5493312		50	11032	824.586	160	4096	9096833	9096833		9096833	7457286		4	11699	540.962	102	3138	6328713	6328713		6328713	4945720		8	10212	977.852	294	4494
	23	1211	2657.4	1504	4924	3218110	3218110	3218110				23	1155	3218.93	2251	5343	3717870	3717870	3717870				51	314	2561.84	2126	3215	804419	804419	804419				5	976	1624.42	844	3236	1585434	1585434	1585434				9	1249	2974.14	1697	5302
	24	7149	1057.75	361	4924	7561868	7561868		7561868	4343758		24	10445	1249.54	135	5343	13051416	13051416		13051416	9333546		52	6083	980.612	212	3215	5965062	5965062		5965062	5160643		6	12154	457.431	129	3236	5559614	5559614		5559614	3974180		10	11795	1045.27	287	5302
	1	921	2438.97	1847	3508	2246292	2246292	2246292				25	1237	2597.57	1480	5153	3213190	3213190	3213190				53	583	3048.4	2126	4227	1777219	1777219	1777219				7	840	1734.35	891	4061	1456852	1456852	1456852				11	258	2196.16	1697	5958
	2	8795	892.177	148	3508	7846693	7846693		7846693	5600401		26	7532	1002.88	285	3971	7553701	7553701		7553701	4340511		54	8280	870.12	207	4227	7204596	7204596		7204596	5427377		8	13137	505.008	147	4061	6634286	6634286		6634286	5177434		12	9072	1006.9	276	5958
	3	1298	2599.02	1847	3970	3373530	3373530	3373530				1	613	1932.4	1543	2774	1184563	1184563	1184563				55	509	2348.44	1766	3161	1195356	1195356	1195356				9	920	1431.78	871	3193	1317240	1317240	1317240				13	737	4424.33	2635	7847
	4	13653	831.677	111	3970	11354883	11354883		11354883	7981353		2	8591	722.021	150	2774	6202880	6202880		6202880	5018317		56	8729	757.415	226	3161	6611472	6611472		6611472	5416116		10	13443	455.761	101	3193	6126794	6126794		6126794	4809554		14	9862	1450.48	359	7847
	5	1072	2499.5	1326	4453	2679464	2679464	2679464				3	571	2184.88	1542	3124	1247568	1247568	1247568				57	722	2452.35	1766	4170	1770599	1770599	1770599				11	1044	1535.72	846	3073	1603290	1603290	1603290				15	598	4191.38	2894	6129
	6	9975	771.841	81	4453	7699113	7699113		7699113	5019649		4	13194	582.138	117	3124	7680728	7680728		7680728	6433160		58	22946	796.839	193	4170	18284264	18284264		18284264	16513665		12	11449	490.386	70	3073	5614435	5614435		5614435	4011145		16	9359	1165.39	191	6129
	7	1020	2056.65	1325	3196	2097782	2097782	2097782				5	633	2151.16	1644	3065	1361684	1361684	1361684				1	1393	2123.49	1287	3977	2958015	2958015	2958015				13	955	1767.94	891	3462	1688386	1688386	1688386
	8	11456	660.563	67	3196	7567406	7567406		7567406	5469624		6	7156	967.438	313	3065	6922987	6922987		6922987	5561303		2	7448	1064.84	325	3977	7930935	7930935		7930935	4972920		14	14715	437.235	135	3462	6433919	6433919		6433919	4745533
	9	1262	2383.97	1325	3708	3008569	3008569	3008569				7	592	2146.59	1643	3075	1270780	1270780	1270780				3	788	2139.73	1442	3546	1686104	1686104	1686104				15	1097	1488.69	858	2728	1633088	1633088	1633088
	10	11941	804.617	123	3708	9607929	9607929		9607929	6599360		8	9367	740.592	222	3075	6937123	6937123		6937123	5666343		4	11556	780.823	282	3546	9023196	9023196		9023196	7337092		16	12696	517.218	88	2728	6566604	6566604		6566604	4933516
	11	1122	2076.85	1326	3219	2330228	2330228	2330228				9	807	2577.91	2086	3396	2080374	2080374	2080374				5	634	2919.41	1825	4261	1850906	1850906	1850906				17	834	1319.21	891	2484	1100218	1100218	1100218
	12	10631	687.619	110	3219	7310074	7310074		7310074	4979846		10	7164	1052.49	261	3396	7540069	7540069		7540069	5459695		6	11558	838.486	251	4261	9691220	9691220		9691220	7840314		18	9918	548.145	99	2484	5436498	5436498		5436498	4336280
	13	877	2522.18	1782	3985	2211949	2211949	2211949				11	1248	2924.71	2097	4566	3650037	3650037	3650037				7	756	2366.55	1811	3308	1789111	1789111	1789111				19	627	1438.19	891	2653	901748	901748	901748
	14	9592	916.138	134	3985	8787597	8787597		8787597	6575648		12	10539	1235.34	200	4566	13019268	13019268		13019268	9369231		8	12228	845.483	257	3308	10338566	10338566		10338566	8549455		20	15888	367.415	106	2653	5837489	5837489		5837489	4935741
	15	1359	2808.62	1673	4744	3816915	3816915	3816915				13	575	3009.34	2101	3818	1730373	1730373	1730373				9	335	3346.16	1823	8765	1120965	1120965	1120965				21	707	1378.06	891	2812	974287	974287	974287
	16	9226	1013	168	4744	9345903	9345903		9345903	5528988		14	10162	957.86	222	3818	9733771	9733771		9733771	8003398		10	9939	627.881	236	8765	6240509	6240509		6240509	5119544		22	16755	422.638	67	3408	7081301	7081301		7081301	6107014
	17	1110	2564.57	1680	4189	2846671	2846671	2846671				15	664	2827.36	2099	4128	1877366	1877366	1877366				11	730	3089.93	2133	5139	2255651	2255651	2255651				23	1099	1573.27	891	3985	1729020	1729020	1729020
	18	10744	804.769	165	4189	8646441	8646441		8646441	5799770		16	8557	992.831	156	4128	8495654	8495654		8495654	6618288		12	5892	1377.03	280	5139	8113458	8113458		8113458	5857807		24	11365	545.57	105	3985	6200407	6200407		6200407	4471387
	19	698	2610.54	1674	3916	1822156	1822156	1822156				17	714	2953.6	2098	4313	2108871	2108871	2108871				13	576	2893.74	2132	4347	1666792	1666792	1666792				25	504	1489.41	891	2831	750661	750661	750661
	20	10563	624.763	201	3916	6599374	6599374		6599374	4777218		18	8148	1070.67	205	4313	8723848	8723848		8723848	6614977		14	9468	1184.52	267	4347	11215054	11215054		11215054	9548262		26	10147	434.342	94	2831	4407273	4407273		4407273	3656612
	21	1363	1815.14	1131	3149	2474038	2474038	2474038				19	560	2924.49	2108	4554	1637715	1637715	1637715				15	424	2808.87	2133	3536	1190960	1190960	1190960				27	699	1584.14	892	3196	1107311	1107311	1107311
	22	8994	772.79	118	3149	6950471	6950471		6950471	4476433		20	9217	904.572	219	4554	8337437	8337437		8337437	6699722		16	7936	959.138	326	3536	7611717	7611717		7611717	6420757		28	11775	440.922	129	3196	5191851	5191851		5191851	4084540
	23	2106	1727.73	1003	2973	3638596	3638596	3638596				21	1042	3683.86	2351	6445	3838577	3838577	3838577				17	454	2797.44	2131	4131	1270036	1270036	1270036				29	1523	1870.79	827	4850	2849219	2849219	2849219
	24	7897	909.842	167	2973	7185020	7185020		7185020	3546424		22	11832	1507.61	213	6445	17838031	17838031		17838031	13999454		18	9510	1113.53	307	4131	10589624	10589624		10589624	9319588		30	12537	660.558	190	4850	8281418	8281418		8281418	5432199
	25	1347	2933.64	1739	4919	3951606	3951606	3951606				23	1098	3208.96	2387	4797	3523443	3523443	3523443				19	761	3132.56	2133	4416	2383879	2383879	2383879				31	492	1445.76	890	3047	711316	711316	711316
	26	9932	1063.48	181	4919	10562516	10562516		10562516	6610910		24	10150	1381.71	172	4797	14024406	14024406		14024406	10500963		20	11593	1266.95	383	4416	14687763	14687763		14687763	12303884		32	16702	414.765	100	3047	6927402	6927402		6927402	6216086
	27	1101	2099.52	1130	3839	2311572	2311572	2311572				25	465	3147.84	2452	4340	1463747	1463747	1463747				21	593	2833.55	2131	4025	1680295	1680295	1680295				33	349	1297.64	891	2216	452875	452875	452875
	28	9550	684.361	129	3839	6535649	6535649		6535649	4224077		26	7208	1096.38	146	4340	7902730	7902730		7902730	6438983		22	11424	883.654	256	4025	10094869	10094869		10094869	8414574		34	10528	398.663	82	2216	4197124	4197124		4197124	3744249
	29	948	2113.23	1415	3199	2003343	2003343	2003343				27	753	2351.65	1771	3693	1770790	1770790	1770790				23	653	3033.55	2132	4746	1980906	1980906	1980906				35	224	1300.98	892	2145	291419	291419	291419
	30	9213	796.898	100	3199	7341820	7341820		7341820	5338477		28	12548	709.038	201	3693	8897004	8897004		8897004	7126214		24	7031	1307.07	308	4746	9190029	9190029		9190029	7209123		36	9307	360.749	37	2145	3357488	3357488		3357488	3066069
	31	1238	2484.9	1414	4194	3076304	3076304	3076304				29	548	2513.82	1770	3559	1377574	1377574	1377574				25	663	2960.2	1928	4676	1962613	1962613	1962613
	32	10580	803.355	106	4194	8499500	8499500		8499500	5423196		30	10086	793.211	171	3559	8000328	8000328		8000328	6622754		26	9535	1095.44	293	4676	10445034	10445034		10445034	8482421
	33	1122	3298.18	1739	5413	3700558	3700558	3700558				31	593	2375.68	1770	3668	1408779	1408779	1408779				27	510	2636.9	1926	3751	1344821	1344821	1344821
	34	10467	984.431	85	5413	10304044	10304044		10304044	6603486		32	11524	664.29	150	3668	7655280	7655280		7655280	6246501		28	8628	804.87	270	3751	6944420	6944420		6944420	5599599
	35	823	1605.26	1086	2502	1321125	1321125	1321125				33	578	2106.46	1386	3502	1217533	1217533	1217533				29	466	2600.41	1925	3727	1211789	1211789	1211789
	36	9514	505.762	143	2502	4811818	4811818		4811818	3490693		34	9079	763.583	114	3502	6932570	6932570		6932570	5715037		30	8892	799.487	170	3727	7109040	7109040		7109040	5897251
	37	1283	1859.67	1086	3297	2385952	2385952	2385952				35	1573	1901.21	1346	3135	2990597	2990597	2990597				31	663	3079.92	2097	5153	2041988	2041988	2041988
	38	8829	759.901	80	3297	6709169	6709169		6709169	4323217		36	17436	839.305	221	3135	14634114	14634114		14634114	11643517		32	8027	1274.09	304	5153	10227082	10227082		10227082	8185094
	39	1269	2054.49	1195	3260	2607147	2607147	2607147															33	478	2864.06	2097	3997	1369022	1369022	1369022
	40	9763	730.75	98	3260	7134308	7134308		7134308	4527161													34	9030	874.323	268	3997	7895135	7895135		7895135	6526113
	41	607	1938.3	1195	2808	1176548	1176548	1176548															35	451	2866.43	2097	4304	1292762	1292762	1292762
	42	9294	617.491	129	2808	5738962	5738962		5738962	4562414													36	9972	733.167	170	4304	7311145	7311145		7311145	6018383
	43	1282	2220.33	1446	3784	2846463	2846463	2846463															1	532	3340.56	2232	4949	1777179	1777179	1777179
	44	8119	1013.6	112	3784	8229448	8229448		8229448	5382985													2	10607	985.748	284	4949	10455825	10455825		10455825	8678646
	45	923	2372.45	1479	3796	2189772	2189772	2189772															3	594	4183.26	3194	6254	2484855	2484855	2484855
	46	8095	807.479	105	3796	6536545	6536545		6536545	4346773													4	8952	1348.99	293	6254	12076120	12076120		12076120	9591265
	47	1041	2202.06	1478	3395	2292344	2292344	2292344															5	393	4344.46	3193	6211	1707373	1707373	1707373
	48	8297	860.091	125	3395	7136174	7136174		7136174	4843830													6	8777	1507.28	276	6211	13229353	13229353		13229353	11521980
	49	864	1877.93	1283	3019	1622534	1622534	1622534															7	456	3080.04	2335	5143	1404497	1404497	1404497
	50	9275	720.533	94	3019	6682940	6682940		6682940	5060406													8	8485	1054.39	252	5143	8946496	8946496		8946496	7541999
																							9	580	3348.33	2338	5257	1942032	1942032	1942032
																							10	9273	1156.62	195	5257	10725343	10725343		10725343	8783311
																							11	418	2662.31	2028	3583	1112844	1112844	1112844
																							12	8876	933.754	381	3583	8288001	8288001		8288001	7175157
																							13	356	3620.65	2821	5058	1288951	1288951	1288951
																							14	6192	1418.87	366	5058	8785655	8785655		8785655	7496704
																							15	399	3440.43	2817	4541	1372733	1372733	1372733
																							16	5309	1512.12	347	4541	8027830	8027830		8027830	6655097
																							17	1054	4152.47	2815	6194	4376706	4376706
																							18	20687	1289.03	568	6194	26666203	26666203
AVEC NUCLEOLE							SANS NUCLEOLE										No UV	1h	2h	4h	16h
	No UV	1h	2h	4h	16h			No UV	1h	2h	4h	16h				Average	2.91125e+06	1.86409e+06	1.59026e+06	1.28741e+06	2.37821e+06
Average	8.623e+06	8.03554e+06	8.57918e+06	7.07916e+06	1.05343e+07		Average	5.71175e+06	6.17145e+06	6.98893e+06	5.79175e+06	8.15609e+06				SD	921026	904013	552553	516304	1.45385e+06
SD	2.18535e+06	3.19077e+06	2.76611e+06	2.13677e+06	3.23641e+06		SD	1.55222e+06	2.42239e+06	2.41886e+06	1.8312e+06	2.17845e+06				SEM	111691	113895	64671.4	67217.1	212067
SEM	265012	401999	323749	278184	472079		SEM	188235	305192	283106	238402	317760
																Percentage	100	64.0306	54.6246	44.2221	81.6905
Percentage	100	93.1873	99.4919	82.0963	122.165		Percentage	100	108.048	122.361	101.401	142.795				SD	31.6368	31.0524	18.9799	17.7348	49.9392
SD	25.3432	37.003	32.0783	24.7799	37.5323		SD	27.176	42.4106	42.3489	32.0602	38.1398				SEM	3.83653	3.91224	2.22143	2.30888	7.28438
SEM	3.07332	4.66194	3.75448	3.22607	5.47465		SEM	3.29557	5.34323	4.95656	4.17388	5.56327
							t.test		0.202681	0.000263853	0.792747	4.26899e-09
										***		***
[truncated: 5 more columns]

## Sheet: IF XAB2
		noUV							1h							2h							4h							16h
		Area	Mean	IntDen	RawIntDen				Area	Mean	IntDen	RawIntDen				Area	Mean	IntDen	RawIntDen				Area	Mean	IntDen	RawIntDen				Area	Mean	IntDen	RawIntDen
	7	6418	324.21	2080778	2080778			6	6052	1064.94	6445035		6445035		10	7989	283.755	2266917	2266917			18	9867	633.876	6254456		6254456		5	12692	333.355	4230941	4230941
	8	7025	508.936	3575277	3575277			1	5522	1227.55	6778551	6778551			3	7452	673.411	5018256	5018256			4	12592	525.416	6616033		6616033		14	6497	658.195	4276295	4276295
	15	3554	1316.66	4679420	4679420			7	8660	791.004	6850093	6850093			4	6442	1123.3	7236327	7236327			11	5697	1227.26	6991688		6991688		3	7041	611.953	4308758	4308758
	14	5206	1695.16	8824985	8824985			5	7258	990.436	7188582	7188582			18	7389	1003.59	7415488	7415488			9	9387	824.514	7739712		7739712		1	11555	376.349	4348715	4348715
	5	10423	955.569	9959895	9959895			8	7526	1142.55	8598840	8598840			6	5499	1392.19	7655678	7655678			4	12453	629.903	7844187		7844187		12	6900	817.995	5644166	5644166
	3	9452	1073.69	10148492	10148492			6	7051	1219.74	8600388	8600388			2	5657	1454.34	8227226	8227226			11	8567	920.425	7885285		7885285		7	11994	516.167	6190903	6190903
	2	10798	981.857	10602097	10602097			6	8279	1048.69	8682139	8682139			25	8280	1016.13	8413555	8413555			19	11111	749.217	8324553		8324553		12	9065	714.199	6474212	6474212
	5	7740	1572.91	12174336	12174336			4	7882	1101.71	8683665	8683665			16	7292	1203.87	8778588	8778588			14	10792	785.709	8479367		8479367		4	10646	635.465	6765158	6765158
	2	6758	1844.08	12462299	12462299			2	8283	1126.24	9328674	9328674			24	8729	1007.81	8797185	8797185			6	11200	770.05	8624558		8624558		9	8716	792.438	6906887	6906887
	4	15537	805.173	12509979	12509979			3	7330	1304.7	9563455	9563455			6	11344	791.347	8977041	8977041			15	10233	850.147	8699556		8699556		1	11599	612.527	7104698	7104698
	9	10167	1243.06	12638210	12638210			2	8909	1135.76	10118523	10118523			8	8862	1028.62	9115605	9115605			8	12816	681.169	8729860		8729860		13	7615	1061.11	8080350	8080350
	25	9655	1349.5	13029411	13029411			1	7392	1378.29	10188307	10188307			6	8632	1060.08	9150622	9150622			5	11315	780.027	8826009	8826009			9	8585	971.981	8344461	8344461
	19	9898	1324.9	13113873	13113873			18	11263	921.022	10373471	10373471			1	6425	1489.58	9570528	9570528			3	12429	714.4	8879277	8879277			15	8560	993.85	8507356	8507356
	7	8564	1565.97	13410937	13410937			12	7541	1386.76	10457523	10457523			7	8548	1156.24	9883519	9883519			2	12459	714.007	8895815	8895815			7	8529	1038.13	8854214	8854214
	4	7656	1755.61	13440967	13440967			17	10462	1022.8	10700516	10700516			2	7919	1251.32	9909234	9909234			5	13765	652.556	8982429	8982429			2	8743	1058.96	9258454	9258454
	9	9859	1417.07	13970844	13970844			4	9674	1116.68	10802774	10802774			4	6269	1598.63	10021796	10021796			2	11875	787.431	9350741	9350741			1	7793	1228.61	9574581	9574581
	3	7138	1970.63	14066368	14066368			7	7861	1389.72	10924615	10924615			17	11078	907.073	10048555	10048555			6	15819	599.101	9477172	9477172			13	9572	1118.17	10703163	10703163
	22	11518	1223.99	14097887	14097887			8	6509	1681.2	10942932	10942932			11	7467	1353.93	10109776	10109776			7	10516	903.413	9500292	9500292			6	12750	939.979	11984726	11984726
	16	11679	1220.19	14250611	14250611			10	7218	1622.65	11712298	11712298			14	6813	1501.02	10226432	10226432			8	9605	1013.2	9731784	9731784			8	9445	1470.22	13886251	13886251
	10	9810	1453.74	14261181	14261181			3	7587	1544	11714320	11714320			23	9787	1066.69	10439710	10439710			3	14488	685.264	9928111	9928111			16	7368	1913.99	14102270	14102270
	8	10416	1375.79	14330222	14330222			19	8957	1311.02	11742761	11742761			14	9213	1191.39	10976288	10976288			7	9387	1060.8	9957713	9957713			15	16311	947.086	15447922	15447922
	10	9897	1457.99	14429744	14429744			3	13851	852.896	11813461	11813461			20	10589	1113.59	11791775	11791775			9	13916	716.427	9969800	9969800			3	9801	1671.36	16380964	16380964
	15	10890	1328.09	14462886	14462886			8	9521	1250.07	11901896	11901896			9	9184	1289.17	11839743	11839743			5	13452	774.4	10417230	10417230			10	7816	2099.32	16408324	16408324
	24	11325	1299.66	14718705	14718705			15	9941	1228.06	12208184	12208184			21	8186	1460.59	11956350	11956350			2	15064	701.737	10570970	10570970			4	9734	1721.06	16752751	16752751
	23	8452	1748.95	14782093	14782093			4	7536	1631.68	12296338	12296338			13	11346	1070.5	12145937	12145937			1	12376	857.6	10613652	10613652			6	11375	1494.39	16998670	16998670
	5	10796	1370.25	14793231	14793231			10	8759	1404.51	12302138	12302138			3	8309	1471.32	12225167	12225167			17	13342	842.276	11237646	11237646			16	17358	992.51	17227992	17227992
	8	8792	1684.12	14806742	14806742			1	8785	1406.7	12357887	12357887			7	7938	1550.87	12310808	12310808			10	13428	842.49	11312951	11312951			10	13204	1315.6	17371200	17371200
	4	9268	1625.15	15061924	15061924			13	12006	1056.12	12679736	12679736			13	10544	1175.65	12396085	12396085			4	10877	1046.18	11379289	11379289			9	7108	2560.84	18202457	18202457
	11	10249	1473.18	15098609	15098609			5	7451	1706.2	12712868	12712868			15	7842	1591.5	12480546	12480546			12	8193	1425.85	11682000	11682000			3	9391	1943.4	18250435	18250435
	7	14254	1062.04	15138349	15138349			9	8135	1570.66	12777304	12777304			10	11553	1082.27	12503477	12503477			13	12161	970.317	11800022	11800022			5	8241	2237.7	18440859	18440859
	18	11480	1342.13	15407638	15407638			16	9477	1350.49	12798601	12798601			26	6083	2088.08	12701786	12701786			16	17481	681.039	11905250	11905250			5	7198	2563.21	18449956	18449956
	1	9634	1622.4	15630206	15630206			11	8585	1496.52	12847653	12847653			21	8508	1494.33	12713719	12713719			4	12316	987.468	12161658	12161658			1	8996	2100.44	18895585	18895585
	21	10406	1506.72	15678959	15678959			2	8714	1477.62	12875963	12875963			12	9708	1358.17	13185075	13185075			15	12582	976.389	12284924	12284924			11	7510	2635.3	19791122	19791122
	17	8859	1772.6	15703498	15703498			13	8667	1502.58	13022885	13022885			28	13954	959.281	13385808	13385808			5	13491	932.179	12576023	12576023			6	10337	1945.19	20107396	20107396
	18	10161	1555.05	15800835	15800835			13	7324	1847.96	13534441	13534441			22	10235	1341.26	13727796	13727796			10	10584	1190.65	12601874	12601874			5	9297	2174.24	20213941	20213941
	4	9368	1743.96	16337415	16337415			14	9045	1531.13	13849099	13849099			3	7151	1934.01	13830136	13830136			1	13700	954.24	13073091	13073091			8	6943	2925.26	20310073	20310073
	6	10494	1596.34	16751941	16751941			8	6549	2119.52	13880729	13880729			12	8169	1740.6	14218998	14218998			14	11466	1178.96	13517919	13517919			8	10885	1887.63	20546818	20546818
	17	9777	1716.17	16779008	16779008			11	7322	1917.88	14042741	14042741			19	10950	1381	15121997	15121997			6	13982	1019.84	14259425	14259425			12	9020	2283.53	20597458	20597458
	12	9291	1813.56	16849824	16849824			17	10152	1391.8	14129590	14129590			29	8722	1760.41	15354287	15354287			11	16985	839.734	14262876	14262876			9	8563	2414.86	20678472	20678472
	1	7080	2395.64	16961147	16961147			2	8712	1627.35	14177437	14177437			19	7508	2092.87	15713278	15713278			7	11735	1215.63	14265460	14265460			7	6975	2977.53	20768241	20768241
	6	8565	1996.72	17101926	17101926			7	8836	1633.75	14435814	14435814			8	12039	1316.64	15851043	15851043			6	14900	966.52	14401151	14401151			14	8890	2390.04	21247420	21247420
	22	10069	1704.88	17166480	17166480			15	10585	1394.37	14759353	14759353			11	9868	1624.66	16032152	16032152			3	16551	879.421	14555304	14555304			3	9754	2231.46	21765621	21765621
	13	8231	2102.65	17306948	17306948			7	7709	1923.27	14826521	14826521			9	15856	1011.5	16038367	16038367			10	14223	1059.69	15071960	15071960			11	11031	2006.12	22129566	22129566
	2	10474	1680.66	17603263	17603263			15	9104	1652.52	15044540	15044540			1	12014	1368.45	16440553	16440553			7	10328	1480.57	15291309	15291309			10	9292	2388.56	22194521	22194521
	3	12223	1444.48	17655858	17655858			5	10445	1481.02	15469208	15469208			16	8493	1951.3	16572405	16572405			1	12921	1189.68	15371917	15371917			6	10044	2362.87	23732695	23732695
	14	11229	1573.94	17673751	17673751			3	6961	2229.09	15516718	15516718			1	7752	2167.26	16800595	16800595			18	13064	1234.43	16126619	16126619			2	13441	1791.92	24085148	24085148
	3	12001	1481.37	17777933	17777933			12	9395	1704.54	16014184	16014184			11	8874	1927.31	17102971	17102971			12	12913	1325.38	17114570	17114570			4	6860	3535.3	24252153	24252153
	9	8282	2159.66	17886290	17886290			9	8456	1914.66	16190337	16190337			22	15135	1187.9	17978912	17978912			9	12388	1398.83	17328730	17328730			13	8643	2829.29	24453562	24453562
	11	11343	1587.34	18005239	18005239			9	13169	1264.56	16653028	16653028			20	11992	1502.14	18013628	18013628			3	16340	1075.1	17567193	17567193			2	9431	2746.42	25901507	25901507
	6	14862	1249.77	18574144	18574144			18	12659	1320.14	16711704	16711704			15	14939	1215.26	18154781	18154781			13	12068	1466.86	17702004	17702004			4	13869	2034.63	28218264	28218264
	12	7401	2544.05	18828542	18828542			10	10868	1609.67	17493909	17493909			7	12731	1426.35	18158910	18158910			12	17591	1167.38	20535396	20535396			11	11042	2592.07	28621652	28621652
	19	11247	1695.75	19072096	19072096			20	11894	1478.74	17588146	17588146			18	11032	1683.11	18568045	18568045			9	14742	1413.36	20835747	20835747			8	18012	1708.89	30780467	30780467
	15	10118	1900.68	19231116	19231116			16	14324	1249.83	17902572	17902572			14	8475	2298.81	19482385	19482385			12	12623	1654.6	20885960	20885960			2	15358	2191.66	33659501	33659501
	12	10452	1860.8	19449088	19449088			4	11738	1602.93	18815158	18815158			19	10574	1854.8	19612630	19612630			8	15420	1370.38	21131177	21131177			14	15324	2213.9	33925833	33925833
	13	12272	1626.18	19956480	19956480			14	18095	1110.15	20088199	20088199			9	10897	1813.91	19766210	19766210			1	17049	1258.24	21451737	21451737			7	13291	3344.3	44449114	44449114
	5	14332	1397.69	20031748	20031748			1	8710	2343.81	20414593	20414593			5	9936	1998.24	19854482	19854482			10	11735	1890.32	22182936	22182936
	6	10432	1937.44	20211400	20211400			6	10861	2285.02	24817570	24817570			17	10010	2053.02	20550746	20550746			11	13524	1670.58	22592915	22592915
	2	16677	1218.06	20313497	20313497			5	11598	2208.98	25619737	25619737			5	12392	1686.68	20901292	20901292			2	17476	1429.76	24986471	24986471
	1	12470	1666.54	20781719	20781719			12	10781	2400.32	25877868	25877868			16	10548	2003.92	21137379	21137379			8	17954	1392.86	25007379	25007379
	10	10256	2052.16	21046970	21046970			9	12409	2106.24	26136397	26136397			8	12893	1669.04	21518935	21518935			16	17262	1521.24	26259609	26259609
	13	14282	1479.13	21124971	21124971			10	10559	2596.15	27412736	27412736			10	14703	1495.5	21988351	21988351			17	14907	1809.75	26977941	26977941
	10	10299	2069.71	21315925	21315925			11	9407	2952.97	27778603	27778603			5	14577	1590.03	23177873	23177873
	9	11681	1831.67	21395685	21395685			11	12214	2379.02	29057401	29057401			13	12504	1921.93	24031814	24031814
	14	9736	2226.75	21679641	21679641			14	12676	2466.02	31259239	31259239			2	11325	2124.7	24062259	24062259
	16	9810	2244.65	22019979	22019979										18	12129	2040.4	24748046	24748046
	20	10903	2143.06	23365807	23365807										27	14217	1753.98	24936390	24936390
	21	10529	2256.04	23753868	23753868										15	10013	2492.13	24953725	24953725
	1	15474	1543.67	23886737	23886737										4	11451	2304.04	26383570	26383570
	20	11042	2201.25	24306165	24306165										12	15695	1785.32	28020580	28020580
	11	8985	2720.57	24444351	24444351										17	13490	2381.86	32131330	32131330
	8	12978	1923.28	24960355	24960355
	7	13537	1870.97	25327374	25327374
	No UV	1h	2h	4h	16h
Average	1.64733e+07	1.46991e+07	1.50687e+07	1.4736e+07	1.71055e+07
SD	4.67571e+06	5.71332e+06	5.99023e+06	5.1356e+06	8.65909e+06
SEM	551037	719810	715970	726284	1.16759e+06
Percentage	100	89.2301	91.4738	89.4539	103.838
SD	28.3836	34.6823	36.3633	31.1754	52.5644
SEM	3.34504	4.36956	4.34625	4.40886	7.08779
p-value		0.0526563	0.12246	0.0595995	0.625722

## Sheet: IF AQR
		noUV							1h							2h							4h							16h
		Area	Mean	IntDen	RawIntDen				Area	Mean	IntDen	RawIntDen				Area	Mean	IntDen	RawIntDen				Area	Mean	IntDen	RawIntDen				Area	Mean	IntDen	RawIntDen
	1	226.612	342.62	77641.6	6027020			1	237.755	255.96	60855.7	4723999			1	178.754	403.651	72154.3	5601061			1	211.385	570.594	120615	9362878			1	178.136	1444.62	257338	19976205
	2	194.767	337.504	65734.6	5102728			2	239.971	387.111	92895.3	7211108			2	156.777	285.486	44757.7	3474367			2	197.665	927.462	183327	14230983			2	418.969	861.257	360840	28010667
	3	153.35	240.244	36841.5	2859862			3	243.475	463.095	112752	8752498			3	186.445	375.62	70032.4	5436350			3	268.994	559.003	150369	11672540			3	316.401	1158.06	366412	28443146
	4	133.795	266.966	35718.7	2772704			4	256.086	492.218	126050	9784798			4	163.721	241.53	39543.4	3069606			4	114.394	289.429	33109.1	2570130			4	208.422	858.213	178871	13885036
	5	261.729	387.909	101527	7881138			5	193.053	316.849	61168.7	4748294			5	188.905	235.743	44533.2	3456939			5	118.542	431.009	51092.9	3966144			5	165.524	171.333	28359.8	2201461
	6	248.215	318.991	79178.4	6146317			6	237.317	259.672	61624.5	4783678			6	148.893	602.408	89694.3	6962630			6	154.342	524.03	80879.9	6278402			6	311.338	1030.21	320744	24898104
	7	155.579	274.94	42774.8	3320447			7	281.013	294.354	82717.5	6421041			7	188.403	399.599	75285.6	5844136			7	198.142	620.997	123045	9551550			7	252.879	251.766	63666.2	4942166
	8	172.068	346.71	59657.8	4631004			8	265.941	391.302	104063	8078030			8	189.24	238.133	45064.4	3498179			8	142.117	832.372	118294	9182723			8	285.239	294.886	84113	6529370
	9	165.64	297.8	49327.6	3829112			9	191.108	378.838	72399	5620058			9	155.308	331.974	51558.4	4002282			9	105.557	504.565	53260.5	4134406			9	284.917	1322.87	376907	29257861
	10	203.102	376.995	76568.2	5943698			10	275.951	290.648	80204.6	6225975			10	166.902	332.442	55485.4	4307120			10	189.962	935.421	177694	13793719			10	242.483	418.609	101505	7879479
	11	205.214	274.133	56255.9	4366932			11	227.604	533.248	121369	9421430			11	179.166	414.982	74350.8	5771572			11	133.705	484.007	64714.2	5023513			11	148.571	1851.4	275065	21352236
	12	191.907	243.933	46812.5	3633873			12	197.91	512.469	101423	7873064			12	181.846	363.233	66052.4	5127400			12	117.035	835.491	97781.9	7590434			1	224.19	427.437	95827.1	7438691
	13	279.468	311.493	87052.1	6757524			13	175.791	316.219	55588.5	4315122			13	165.15	291.504	48142	3737082			13	101.396	1181.42	119792	9298971			2	253.136	271.101	68625.6	5327141
	14	186.947	344.199	64347.1	4995019			14	204.184	404.879	82669.8	6417338			14	235.333	699.251	164557	12773926			14	99.541	486.151	48392	3756488			3	185.582	600.488	111440	8650630
	15	251.011	439.291	110267	8559579			15	192.706	373.154	71908.8	5582005			15	221.871	745.81	165474	12845094			15	150.207	1356.33	203730	15814812			4	281.477	726.901	204606	15882785
	16	179.733	282.515	50777.3	3941652			16	260.028	478.865	124518	9665882			16	176.525	374.89	66177.7	5137119			16	185.556	676.855	125594	9749419			5	235.926	833.891	196736	15271882
	17	172.97	394.344	68209.7	5294860			17	182.348	231.37	42189.9	3275040			17	179.372	335.387	60159.3	4669934			1	133.009	401.486	53401.4	4145344			6	308.324	600.34	185099	14368526
	18	237.008	348.815	82671.7	6417491			18	155.102	320.59	49724.3	3859905			18	172.442	321.444	55430.4	4302848			2	120.926	431.615	52193.4	4051573			7	258.199	865.482	223467	17346863
	19	267.577	435.942	116648	9054942			19	189.227	580.828	109909	8531782			1	293.213	432.155	126713	9836271			3	155.54	611.305	95082.5	7380893			8	245.742	289.471	71135.1	5521946
	20	189.691	380.952	72263.2	5609517			20	169.685	301.896	51227.1	3976568			2	276.402	440.398	121727	9449175			4	145.582	726.144	105714	8206155			9	264.756	287.284	76060.2	5904261
	21	182.168	404.167	73626.3	5715331			21	174.503	298.863	52152.5	4048400			3	297.966	531.653	158415	12297127			5	122.575	408.731	50100.1	3889078			10	266.031	834.643	222041	17236213
	22	177.453	315.936	56063.8	4352021			22	144.049	609.647	87819.3	6817075			4	249.697	403.897	100852	7828733			6	167.431	562.724	94217.2	7313721			1	220.995	768.24	169777	13179157
	23	200.126	260.331	52098.9	4044240			23	184.306	306.343	56461	4382852			5	176.757	691.806	122282	9492271			7	121.415	558.652	67828.9	5265297			2	150.194	223.736	33603.8	2608536
	24	174.954	371.169	64937.4	5040843			24	295.545	427.353	126302	9804342			6	180.004	347.694	62586.2	4858330			8	142.297	366.389	52136.1	4047130			3	163.257	818.178	133573	10368774
	25	228.789	506.354	115848	8992853			1	159.16	687.91	109488	8499134			7	167.881	496.203	83303.2	6466513			9	131.515	437.315	57513.5	4464552			4	292.491	893.841	261441	20294656
	26	198.103	368.277	72956.9	5663368			2	233.375	539.276	125853	9769515			8	150.941	628.65	94889.3	7365894			10	163.45	432.95	70765.6	5493266			5	224.254	895.064	200722	15581266
	27	182.889	370.834	67821.5	5264724			3	160.938	254.44	40949	3178714			9	160.294	420.09	67337.9	5227181			11	148.519	545.073	80953.9	6284141			6	196.544	936.56	184076	14289090
	28	208.847	373.489	78002.1	6055005			4	166.696	487.531	81269.6	6308646			10	259.887	275.014	71472.5	5548135			12	114.008	504.824	57554	4467695			7	199.031	873.881	173929	13501463
	29	201.878	361.062	72890.3	5658199			5	258.199	308.223	79582.9	6177714			11	289.722	410.507	118933	9232312			13	145.054	644.906	93546.3	7261642			8	223.881	564.729	126432	9814417
	30	195.694	565.154	110597	8585253			6	270.501	300.575	81306	6311473			12	164.429	333.957	54912.2	4262624			14	127.496	490.881	62585.1	4858245			9	146.716	890.536	130656	10142310
	31	168.448	433.625	73043.4	5670082			7	245.072	548.722	134476	10438879			13	171.553	385.728	66172.8	5136745			15	111.212	813.878	90513.4	7026213			10	188.029	471.537	88662.7	6882551
	32	379.279	260.95	98972.8	7682880			8	283.422	554.294	157099	12195015			1	131.154	658.301	86338.9	6702163			16	149.434	639.386	95546.1	7416880			11	134.504	1027.61	138217	10729226
	1	235.23	532.494	125258	9723339			9	233.826	701.239	163968	12728184			2	148.288	399.199	59196.2	4595179			17	107.09	1000.72	107167	8318964			12	206.696	1429.08	295384	22929561
	2	204.068	438.164	89415.2	6940959			10	153.402	395.714	60703.3	4712167			3	184.448	684.983	126344	9807582			18	155.347	652.164	101312	7864440			13	218.341	318.931	69635.9	5405568
	3	207.688	590.107	122558	9513705			11	261.922	759.466	198921	15441455			4	213.24	576.846	123007	9548535			19	100.804	759.7	76580.5	5944650			14	176.68	513.521	90728.9	7042938
	4	206.915	879.306	181941	14123415			12	144.436	283.838	40996.3	3182389			5	156.532	522.895	81849.8	6353692			20	126.529	389.31	49259.1	3823800			15	293.445	1108.54	325294	25251335
	5	254.038	523.096	132886	10315453			13	174.967	299.36	52378.1	4065913			6	127.715	578.876	73931	5738979			21	136.719	647.261	88493	6869376			16	175.456	1000.35	175517	13624726
	6	192.435	422.828	81367	6316207			14	199.598	273.817	54653.2	4242522			7	145.724	513.191	74784.2	5805214			22	114.201	326.056	37235.9	2890484			17	155.025	1367.39	211980	16455168
	7	213.936	654.947	140116	10876705			15	271.635	766.723	208269	16167118			8	207.121	668.892	138541	10754438			23	109.512	362.411	39688.3	3080855			1	223.481	1728.12	386204	29979508
	8	181.936	360.094	65514.1	5085609			16	202.316	409.474	82843.1	6430797			9	151.031	412.563	62309.9	4836883			24	190.619	487.413	92909.9	7212245			2	217.942	483.356	105344	8177423
	9	302.269	616.647	186393	14468997			17	163.012	304.076	49568	3847773			10	136.101	592.599	80653.3	6260810			25	172.3	1547.2	266582	20693758			3	145.415	914.979	133052	10328287
	10	312.266	364.251	113743	8829453			18	144.114	325.065	46846.3	3636498			11	162.2	440.472	71444.7	5545979			26	134.169	1192.47	159992	12419607			4	160.384	1175.3	188500	14632537
	11	245.6	444.35	109132	8471534			19	179.591	312.104	56051.2	4351038			12	159.766	460.719	73607.1	5713842			27	99.889	791.76	79088.1	6139307			5	179.733	855.779	153812	11939826
	12	214.799	448.258	96285.2	7474255			20	286.888	339.916	97517.7	7569931			13	221.111	604.415	133643	10374181			28	177.182	567.822	100608	7809830			6	203.926	1185.64	241782	18768615
	13	306.623	324.369	99459	7720622			21	178.715	332.937	59501.1	4618841			14	248.241	919.886	228353	17726208			29	110.594	561.038	62047.5	4816508			7	234.109	1405.48	329035	25541749
	14	180.802	445.396	80528.7	6251133			22	276.092	562.839	155396	12062776			1	110.285	582.787	64272.7	4989241			30	163.669	1029.3	168464	13077238			8	179.488	996.086	178786	13878468
	15	194.097	229.551	44555.1	3458645			23	130.678	237.058	30978.2	2404716			2	89.789	574.051	51543.6	4001133			31	147.038	1138.45	167396	12994283			1	322.391	1052.01	339159	26327647
	16	219.063	598.755	131165	10181831			24	223.03	617.904	137811	10697772			3	83.091	536.463	44575	3460187			32	119.779	419.601	50259.4	3901449			2	220.956	785.12	173477	13466384
	17	202.522	414.732	83992.3	6520002			25	209.04	456.184	95360.7	7402491			4	180.107	485.122	87373.8	6782497			1	192.332	687.516	132231	10264618			3	172.815	145.528	25149.4	1952252
	18	293.934	436.382	128268	9956928			1	260.118	429.481	111716	8672083			5	157.872	767.301	121135	9403271			2	185.955	629.804	117115	9091221			4	325.315	961.837	312900	24289264
	19	204.312	409.871	83741.8	6500559			2	291.062	444.182	129284	10035846			6	147.257	968.409	142605	11069886			3	199.495	553.98	110516	8578931			5	256.795	214.308	55033.1	4272012
	20	205.111	451.98	92706.1	7196422			3	262.592	649.452	170541	13238422			7	179.965	619.65	111515	8656513			4	189.305	950.939	180017	13974049			6	289.748	249.168	72195.9	5604293
	21	213.459	377.787	80642	6259928			4	244.351	278.871	68142.2	5289620			8	165.782	434.07	71960.9	5586047			5	188.467	603.096	113664	8823293			7	292.62	1249.12	365519	28373828
	22	146.896	327.577	48119.8	3735356			5	282.546	450.453	127274	9879795			9	157.846	454.326	71713.6	5566851			6	97.854	492.107	48154.4	3738045			8	254.18	416.01	105741	8208287
	1	273.915	424.895	116385	9034532			6	320.716	477.874	153262	11897152			10	151.65	409.935	62166.6	4825753			7	178.793	926.099	165580	12853329			9	291.796	648.126	189120	14680701
	2	285.664	555.86	158789	12326187			7	202.818	283.156	57429.3	4458015			11	154.445	503.853	77817.7	6040691			8	239.12	1190.67	284714	22101244
	3	213.82	461.323	98640	7657047			8	328.819	475.938	156498	12148324			12	168.01	565.103	94943.1	7370072			9	158.568	1597.74	253350	19666622
	4	235.191	647.834	152365	11827506			9	218.419	317.577	69364.8	5384526			13	220.441	716.309	157904	12257481			10	116.932	536.871	62777.5	4873181
	5	216.216	438.414	94791.9	7358335			10	235.552	392.235	92391.6	7172008			14	146.188	816.834	119411	9269428			11	142.31	444.953	63321.4	4915397
	6	154.999	493.671	76518.6	5939850			11	170.935	309.197	52852.4	4102729			15	108.765	506.258	55063.1	4274336			12	141.718	554.837	78630.2	6103765
	7	165.782	380.795	63128.8	4900446			12	233.053	455.096	106061	8233135			16	169.685	708.578	120235	9333392			13	138.085	637.464	88024.1	6832976
	8	185.414	394.08	73068.1	5671999			13	185.337	291.599	54044	4195232			17	121.042	407.587	49335	3829688			14	170.097	1427.01	242730	18842179
	9	183.379	577.257	105857	8217260			14	212.725	302.347	64316.6	4992656			18	142.336	852.072	121280	9414540			15	175.508	623.97	109512	8500961
	10	131.476	458.033	60220.4	4674681			15	219.874	287.071	63119.5	4899725			19	115.683	617.089	71386.4	5541455			16	138.291	1286	177842	13805232
	11	129.209	574.52	74233.1	5762434			16	228.132	313.032	71412.5	5543477			20	186.264	703.131	130968	10166565			1	139.824	450.254	62956.3	4887059
	12	225.903	464.928	105029	8152973			17	263.648	411.536	108501	8422496			21	129.17	805.623	104063	8077980			2	118.491	358.952	42532.6	3301644
	13	240.834	457.689	110227	8556488			18	220.299	218.535	48143.1	3737165			22	169.608	868.077	147232	11429097			3	173.24	487.909	84525.5	6561394
	14	248.086	602.569	149489	11604267			19	219.217	285.835	62659.9	4864051			23	166.774	652.897	108886	8452400			4	93.319	957.288	89333.2	6934593
	15	190.129	424.404	80691.5	6263773			20	200.628	257.969	51755.9	4017614			24	112.101	1391.06	155940	12104998			5	128.14	513.493	65798.9	5107718
	16	211.9	483.685	102493	7956128										25	117.087	1716.41	200969	15600450			6	124.893	565.755	70659	5484990
	17	191.881	604.792	116048	9008373										26	101.332	769.942	78019.6	6056361			7	85.95	525.428	45160.8	3505657
	18	157.498	450.022	70877.7	5501967										27	175.379	716.182	125603	9750101			8	114.15	419.071	47836.8	3713389
	19	151.315	521.369	78890.9	6123999										28	156.635	1234.44	193356	15009521			9	100.378	498	49988.5	3880416
	20	165.756	375.054	62167.5	4825823																	10	164.094	533.652	87569.1	6797653
	21	227.655	651.024	148209	11504898																	11	138.729	279.404	38761.4	3008899
	22	150.89	445.101	67161.2	5213466																	12	135.534	660.324	89496.5	6947272
	23	137.454	555.616	76371.4	5928418																	13	159.534	1924.76	307064	23836221
	24	171.695	644.444	110648	8589146																	14	201.955	524.837	105994	8227873
	25	197.755	601.604	118970	9235216																	15	120.565	662.331	79854	6198760
	26	188.145	596.742	112274	8715421																	16	120.964	592.31	71648.3	5561787
	27	167.109	381.25	63710.1	4945573																	17	137.003	559.9	76707.8	5954535
	28	138.484	576.007	79767.8	6192070																	18	148.532	538.861	80038.2	6213064
	29	191.933	312.163	59914.2	4650911																	19	120.681	647.261	78112	6063540
	30	172.21	392.16	67533.8	5242391																	20	119.831	725.338	86917.8	6747096
																						21	200.705	486.067	97556.3	7572922
																						22	124.443	626.921	78015.6	6056056
																						23	98.742	774.932	76518.6	5939850
																						24	80.797	669.389	54084.9	4198406
	No UV	1h	2h	4h	16h
Average	6.92111e+06	6.98472e+06	7.33017e+06	7.73945e+06	1.41608e+07
SD	2.4814e+06	3.14469e+06	3.21504e+06	4.44461e+06	7.88527e+06
SEM	270743	378576	376292	473797	1.06325e+06
Percentage	100	100.919	105.91	111.824	204.604
SD	35.8526	45.4362	46.4528	64.2183	113.931
SEM	3.91184	5.46988	5.43688	6.84569	15.3624
p-value		0.891495	0.37912	0.0885291	1.125e-08
					µµµ

## Sheet: PLA XAB2-Rloops
		noUV							1h							2h							4h							16h							contrôle GFP
		Area	Mean	IntDen	RawIntDen				Area	Mean	IntDen	RawIntDen				Area	Mean	IntDen	RawIntDen				Area	Mean	IntDen	RawIntDen				Area	Mean	IntDen	RawIntDen				Area	Mean	IntDen	RawIntDen
	1	12808	783.139	10030440	10030440			1	17950	567.534	10187235	10187235			1	16799	67.972	1141864	1141864			1	20824	872.056	18159698	18159698			1	12162	2184.75	26570902	26570902			1	13971	70.021	978262	978262
	2	11737	1502.55	17635432	17635432			2	13491	794.428	10717630	10717630			2	19777	191.996	3797113	3797113			2	16924	1009.99	17093058	17093058			2	11844	1163.49	13780361	13780361			2	19384	81.062	1571307	1571307
	3	9524	893.842	8512954	8512954			3	8314	671.975	5586798	5586798			3	20091	83.566	1678932	1678932			3	23394	1081.42	25298684	25298684			3	11147	1316.44	14674406	14674406			3	18230	83.27	1518008	1518008
	4	9151	1187.98	10871196	10871196			4	13418	1310.7	17586956	17586956			4	11686	130.942	1530190	1530190			4	13004	560.051	7282901	7282901			4	14817	2343.36	34721622	34721622			4	9891	46.65	461416	461416
	5	6070	1491.33	9052385	9052385			5	6144	1189.05	7305495	7305495			5	13587	102.882	1397857	1397857			5	8828	1116.45	9856036	9856036			5	11062	3165.69	35018874	35018874			5	9241	52.896	488811	488811
	6	10185	1736.94	17690768	17690768			6	8538	1025.67	8757148	8757148			6	12448	199.609	2484738	2484738			6	13372	692.287	9257265	9257265			6	10107	3592.72	36311665	36311665			6	13155	62.806	826219	826219
	7	16520	1624.02	26828834	26828834			7	9625	911.146	8769781	8769781			7	20449	52.852	1080768	1080768			7	12014	814.431	9784580	9784580			7	12407	922.351	11443613	11443613			7	10966	60.889	667710	667710
	8	8808	1130.38	9956412	9956412			8	16375	1094.96	17930014	17930014			8	14760	76.182	1124443	1124443			8	18624	936.108	17434077	17434077			8	9119	805.064	7341382	7341382			8	11029	49.731	548481	548481
	9	13230	1376.91	18216496	18216496			9	13134	1174.31	15423428	15423428			9	17341	178.32	3092247	3092247			9	17902	810.213	14504430	14504430			9	12391	1976.99	24496915	24496915			9	12947	67.709	876634	876634
	10	9632	1427.01	13744938	13744938			10	11184	793.201	8871164	8871164			10	14859	160.265	2381373	2381373			10	18794	1136.02	21350338	21350338			10	9913	2211.13	21918938	21918938			10	13902	68.194	948037	948037
	11	9086	1174.23	10669044	10669044			11	9662	598.839	5785984	5785984			11	18536	179.927	3335130	3335130			11	10645	891.288	9487766	9487766			1	20557	1420.34	29197862	29197862			11	12155	64.963	789626	789626
	12	17137	1310.2	22452853	22452853			12	8390	1072.32	8996734	8996734			12	13750	110.418	1518254	1518254			1	20947	993.434	20809456	20809456			2	15894	1822.64	28969055	28969055			12	12355	98.334	1214915	1214915
	13	12340	2563.32	31631360	31631360			13	12341	745.582	9201227	9201227			13	23295	74.348	1731928	1731928			2	19410	1150.62	22333432	22333432			3	18494	1886.21	34883490	34883490			1	21076	106.016	2234392	2234392
	14	11352	2012.07	22841002	22841002			14	9966	758.108	7555308	7555308			14	16629	240.544	4000007	4000007			3	15926	455.939	7261291	7261291			4	25314	1666.97	42197746	42197746			2	15067	64.146	966492	966492
	15	11632	1343.83	15631431	15631431			1	18332	484.718	8885859	8885859			15	15347	153.482	2355485	2355485			4	20873	764.986	15967561	15967561			5	18796	779.959	14660103	14660103			3	19472	74.536	1451364	1451364
	16	14764	1233.17	18206523	18206523			2	19581	728.612	14266954	14266954			16	12865	386.297	4969707	4969707			5	14286	730.208	10431755	10431755			6	17663	950.498	16788647	16788647			4	14967	108.488	1623743	1623743
	17	9321	2541.12	23685770	23685770			3	17845	687.26	12264156	12264156			17	11942	276.695	3304287	3304287			6	14209	969.623	13777378	13777378			7	28458	643.991	18326702	18326702			5	14137	101.222	1430973	1430973
	18	18078	1660.38	30016315	30016315			4	14681	706.095	10366174	10366174			1	21130	177.684	3754473	3754473			7	17594	1458.33	25657779	25657779			8	18969	1589.55	30152251	30152251			6	15676	102.388	1605038	1605038
	1	16622	1081.72	17980388	17980388			5	17136	885.017	15165659	15165659			2	14870	231.283	3439184	3439184			8	13905	862.668	11995401	11995401			9	20381	603.699	12303995	12303995			7	23289	86.974	2025528	2025528
	2	12884	2088.47	26907804	26907804			6	13992	758.617	10614575	10614575			3	15549	172.772	2686425	2686425			9	14499	904.586	13115590	13115590			10	23565	1574.22	37096416	37096416			8	17188	148.036	2544443	2544443
	3	12214	1182.49	14442973	14442973			7	12542	635.601	7971714	7971714			4	18427	141.313	2603979	2603979			10	13260	632.694	8389525	8389525			1	16500	1016.17	16766781	16766781			9	22225	123.154	2737088	2737088
	4	11076	1898.27	21025266	21025266			8	13560	753.47	10217047	10217047			5	12923	224.808	2905196	2905196			11	19683	556.345	10950540	10950540			2	21732	904.606	19658900	19658900			10	14915	98.831	1474060	1474060
	5	14954	1335.82	19975830	19975830			9	15885	918.401	14588802	14588802			6	14041	276.653	3884486	3884486			12	15951	1076.33	17168482	17168482			3	18367	1875.25	34442777	34442777			11	22610	102.656	2321063	2321063
	6	12319	1521.53	18743738	18743738			10	17380	885.898	15396908	15396908			7	14900	174.795	2604451	2604451			13	20933	668.977	14003702	14003702			4	20108	1068.43	21483981	21483981			12	14783	77.688	1148455	1148455
	7	11743	1301.49	15283357	15283357			11	17037	524.186	8930550	8930550			8	20777	363.663	7555835	7555835			14	21515	1097	23601949	23601949			5	25431	1921.86	48874712	48874712			13	19316	75.794	1464035	1464035
	8	10237	1828.61	18719481	18719481			12	12303	720.133	8859791	8859791			9	14856	235.418	3497364	3497364			15	14798	1342.24	19862443	19862443			6	15892	1877.2	29832397	29832397			14	23031	82.766	1906178	1906178
	9	10596	1397.98	14813050	14813050			13	12398	502.93	6235320	6235320			10	13460	198.836	2676336	2676336			16	20165	1036.36	20898260	20898260			7	16932	1720.97	29139502	29139502			15	19380	102.614	1988657	1988657
	10	8384	1839.78	15424716	15424716			14	14778	589.788	8715883	8715883			11	19580	260.037	5091529	5091529			17	13410	784.919	10525761	10525761			1	16472	1567.86	25825847	25825847			16	20977	119.726	2511486	2511486
	11	11465	1240.77	14225478	14225478			15	15920	729.579	11614890	11614890			1	12808	385.621	4939037	4939037			18	22430	720.489	16160561	16160561			2	19969	1986.73	39672943	39672943			17	21854	84.238	1840928	1840928
	12	14725	2400.74	35350874	35350874			16	15535	648.263	10070759	10070759			2	10369	311.509	3230042	3230042			19	18954	978.92	18554442	18554442			3	18688	1640.8	30663204	30663204			18	14810	85.514	1266464	1266464
	13	9245	1864.6	17238209	17238209			17	14962	743.376	11122397	11122397			3	17527	383.209	6716498	6716498			20	12009	445.277	5347337	5347337			4	17748	678.966	12050285	12050285			19	10686	89.477	956155	956155
	14	11504	1491.03	17152747	17152747			18	12410	626.768	7778187	7778187			4	8754	713.279	6244045	6244045			21	15626	677.957	10593758	10593758			5	20877	1440.76	30078670	30078670			20	11008	58.982	649275	649275
	15	12157	2761.34	33569663	33569663			19	13036	667.595	8702772	8702772			5	11717	98.818	1157849	1157849			1	18074	1195.36	21604863	21604863			6	15201	1440.36	21894944	21894944			1	7932	184.64	1464568	1464568
	16	6296	2884.14	18158558	18158558			20	19079	1195.37	22806393	22806393			6	7167	256.129	1835674	1835674			2	12341	620.26	7654626	7654626			7	17172	1344.76	23092212	23092212			2	6446	177.431	1143721	1143721
	17	6194	2982.7	18474832	18474832			21	14782	982.043	14516564	14516564			7	17668	101.908	1800504	1800504			3	14123	927.805	13103392	13103392			8	14478	1400.03	20269593	20269593			3	5598	195.69	1095472	1095472
	1	18610	1065.97	19837802	19837802			22	17570	624.75	10976853	10976853			8	8639	440.112	3802126	3802126			4	24707	685.842	16945108	16945108			9	13201	1177.26	15540991	15540991			4	7826	108.701	850694	850694
	2	16478	721.781	11893506	11893506			23	17946	594.148	10662588	10662588			9	10318	399.581	4122877	4122877			5	21850	921.467	20134049	20134049			10	18711	882.592	16514172	16514172			5	9654	124.733	1204176	1204176
	3	16584	898.551	14901572	14901572			24	16816	633.511	10653119	10653119			10	11323	586.76	6643887	6643887			6	22589	706.247	15953411	15953411			11	15761	845.779	13330325	13330325			6	8489	193.574	1643250	1643250
	4	19293	930.573	17953553	17953553			25	16193	1025.21	16601176	16601176			11	15110	424.503	6414235	6414235			7	18106	943.646	17085649	17085649			1	12632	1823.31	23032031	23032031			7	7217	112.077	808860	808860
	5	12679	1964.79	24911551	24911551			26	16821	923.36	15531831	15531831			12	15194	470.986	7156163	7156163			8	14011	725.361	10163026	10163026			2	8859	881.495	7809160	7809160			8	9134	91.785	838361	838361
	6	13450	1324.14	17809677	17809677			1	14967	356.952	5342497	5342497			13	15227	501.684	7639145	7639145			9	16891	892.866	15081396	15081396			3	13460	1790.71	24102991	24102991			9	8539	177.48	1515500	1515500
	7	14333	2248.78	32231745	32231745			2	15675	587.009	9201364	9201364			14	13136	203.638	2674985	2674985			10	16357	1328.22	21725735	21725735			4	7148	2952.74	21106192	21106192			10	9079	114.167	1036525	1036525
	8	17714	1137.02	20141088	20141088			3	17983	589.408	10599328	10599328			15	8245	699.701	5769034	5769034			11	14493	1016.05	14725589	14725589			5	13554	1240.16	16809121	16809121			11	8306	149.552	1242179	1242179
	9	12980	1355.5	17594444	17594444			4	18622	543.336	10117997	10117997			16	9824	545.277	5356802	5356802			12	14719	1365.15	20093592	20093592			6	12786	2590.84	33126502	33126502			12	7547	142.498	1075429	1075429
	10	13094	1575.8	20633475	20633475			5	17601	597.16	10510610	10510610			1	27695	173.732	4811510	4811510			13	16645	1039.46	17301859	17301859			7	9599	2267.04	21761282	21761282			1	7429	74.536	553728	553728
	11	11045	1948.59	21522142	21522142			6	13210	456.793	6034230	6034230			2	26743	262.525	7020698	7020698			14	20216	908.949	18375314	18375314			8	16430	1810.02	29738685	29738685			2	9502	63.053	599130	599130
	12	11272	1459.53	16451840	16451840			7	14471	704.165	10189968	10189968			3	21683	479.966	10407095	10407095			15	18646	433.934	8091137	8091137			9	11227	1490.16	16730005	16730005			3	9197	145.147	1334920	1334920
	13	8609	1638.71	14107664	14107664			8	13629	709.079	9664040	9664040			4	12698	239.521	3041436	3041436			16	18982	462.238	8774201	8774201			10	12140	2237.23	27159962	27159962			4	9515	74.916	712825	712825
	14	12025	1125.62	13535584	13535584			9	14644	676.917	9912766	9912766			5	15466	224.733	3475715	3475715			17	16867	1150.42	19404089	19404089			11	10397	3438.84	35753621	35753621			5	8762	108.525	950893	950893
	15	15365	2332.38	35837061	35837061			10	17474	656.198	11466400	11466400			6	15645	243.941	3816454	3816454			1	19721	878.349	17321917	17321917			12	11346	1595.85	18106507	18106507			6	7965	107.312	854741	854741
	16	16015	1352.11	21654077	21654077			11	12605	475.693	5996111	5996111			7	16355	529.876	8666118	8666118			2	13865	949.413	13163605	13163605			13	11864	3006.58	35670057	35670057			7	11384	94.444	1075153	1075153
	17	12903	2635.85	34010384	34010384			12	14738	708.926	10448157	10448157			8	18057	643.628	11621988	11621988			3	18155	621.122	11276475	11276475			14	16734	2174.7	36391444	36391444			8	10740	178.174	1913584	1913584
	18	6660	2726.87	18160976	18160976			13	15300	494.061	7559127	7559127			9	16018	349.619	5600205	5600205			4	19163	870.025	16672286	16672286			15	8070	2007.4	16199738	16199738			9	12083	146.027	1764447	1764447
	19	6692	2679.98	17934409	17934409			14	13752	599.153	8239551	8239551			10	17710	225.389	3991644	3991644			5	14829	1107.13	16417572	16417572			16	7067	1378.59	9742492	9742492			10	11733	260.113	3051900	3051900
	20	9656	1715.76	16567396	16567396			15	13858	392.366	5437411	5437411			1	11046	351.094	3878182	3878182			6	14763	586.626	8660362	8660362			17	11249	2109.77	23732795	23732795			11	7271	163.314	1187455	1187455
	21	12042	1339.26	16127303	16127303			16	15553	429.185	6675115	6675115			2	15429	266.086	4105439	4105439			7	19599	957.675	18769480	18769480			18	13001	1830.66	23800441	23800441			12	11237	203.416	2285785	2285785
	1	9534	1355.17	12920239	12920239			17	12561	530.872	6668281	6668281			3	13452	262.548	3531789	3531789			8	17338	828.333	14361631	14361631			19	12371	1610.05	19917865	19917865			13	10120	130.097	1316583	1316583
	2	5878	1908.52	11218295	11218295			18	16056	631.464	10138784	10138784			4	11388	302.944	3449927	3449927			9	15623	1066.56	16662879	16662879			20	14646	1763.03	25821282	25821282
	3	11692	1404.8	16424935	16424935			19	12562	490.554	6162345	6162345			5	9720	516.858	5023859	5023859			10	20448	1667.62	34099405		34099405		21	9888	1652.32	16338155	16338155
	4	13563	1285.99	17441930	17441930			1	15946	475.978	7589953	7589953			6	16032	338.522	5427187	5427187			11	16495	1056.36	17424680	17424680			22	15382	2349.78	36144238	36144238
	5	10969	832.887	9135934	9135934			2	18879	627.804	11852309	11852309										1	15994	755.157	12077989	12077989			23	9949	1874.85	18652861	18652861
	6	9763	1184.59	11565145	11565145			3	19268	598.164	11525426	11525426										2	11228	923.214	10365849	10365849			24	13488	1662.32	22421407	22421407
	7	12044	1172.15	14117377	14117377			4	17644	571.418	10082105	10082105										3	16514	1221.55	20172638	20172638			25	11837	1287.21	15236654	15236654
	8	14786	1178.49	17425187	17425187			5	17079	481.129	8217201	8217201										4	16219	888.51	14410749	14410749
	9	13071	804.835	10520000	10520000			6	17619	797.662	14054011	14054011										5	17073	1191.25	20338188	20338188
	10	18473	1003.79	18542940	18542940			7	15865	819.611	13003134	13003134										6	19916	1131.68	22538483	22538483
	11	13999	1262.45	17673064	17673064			8	13790	679.323	9367861	9367861										7	17435	953.862	16630584	16630584
	12	19047	1159.37	22082421	22082421			9	14676	604.207	8867340	8867340										8	17110	887.928	15192442	15192442
	13	16213	1103.67	17893890	17893890			10	17477	877.841	15342019	15342019										9	17222	910.111	15673926	15673926
	14	15128	999.407	15119036	15119036			11	21050	774.46	16302376	16302376
	15	12906	1373.53	17726756	17726756			12	15847	608.053	9635810	9635810
	16	17356	1278.63	22191871	22191871			13	11433	649.874	7430010	7430010
	17	8865	1151.83	10210949	10210949			14	13129	633.022	8310941	8310941
	18	9587	1496.65	14348423	14348423			15	14386	749.215	10778201	10778201
	19	8882	1185.94	10533567	10533567			16	15949	597.067	9522616	9522616
	20	16648	1739.73	28963108	28963108			17	15332	700.964	10747185	10747185
	21	10461	1936.62	20258965	20258965			18	12536	596.392	7476372	7476372
	22	6371	1625.33	10354981	10354981			19	13327	670.629	8937470	8937470
								20	19578	1003.71	19650721	19650721
								21	19901	821.986	16358347	16358347
								22	15565	736.019	11456130	11456130
	No UV	1h	2h	4h	16h	control GFP		23	17372	486.087	8444310	8444310
Average	1.82775e+07	1.04712e+07	4.08326e+06	1.53127e+07	2.40523e+07	1.34307e+06		24	16540	537.404	8888664	8888664
SD	6.41855e+06	3.42934e+06	2.25464e+06	4.83895e+06	9.16871e+06	602482		25	17118	536.631	9186057	9186057
SEM	726758	374172	291073	586809	1.15515e+06	79800.7
Percentage	100	57.2901	22.3403	83.7789	131.595	7.34822
SD	35.1172	18.7626	12.3356	26.4749	50.1638	3.2963
SEM	3.97624	2.04717	1.59252	3.21055	6.32005	0.436605
variance	4.0372e+13	1.17403e+13	4.9987e+12	2.30711e+13	8.27309e+13
p-value		2.75417e-16	1.9977e-33	0.00184568	4.91165e-05
		***	***	**	***

## Sheet: PLA AQR-Rloops
		noUV							1h							2h							4h							16h							contrôle GFP
		Area	Mean	IntDen	RawIntDen				Area	Mean	IntDen	RawIntDen				Area	Mean	IntDen	RawIntDen				Area	Mean	IntDen	RawIntDen				Area	Mean	IntDen	RawIntDen				Area	Mean	IntDen	RawIntDen
	1	317.444	1493.23	474018	36796232			1	191.778	739.987	141913	11016182			1	294.72	1075.83	317069	24612837			1	200.564	1010.77	202724	15736720			1	234.328	1723.72	403915	31354421			1	108.829	289.071	31459.4	2442073
	2	186.303	559.212	104183	8087319			2	183.005	685.135	125383	9733027			2	256.782	411.308	105617	8198610			2	132.262	1886.61	249526	19369771			2	204.351	1543.11	315337	24478382			2	135.251	242.685	32823.4	2547953
	3	343.711	798.875	274582	21314784			3	184.371	723.067	133312	10348535			3	249.851	388.969	97184.4	7544053			3	247.313	2346.06	580213		45039692		3	167.585	1290.32	216239	16785793			3	143.56	328.064	47096.8	3655945
	4	284.504	1140.59	324504	25189973			4	178.355	770.175	137364	10663070			4	224.061	536.029	120103	9323157			4	145.028	1531.16	222061	17237766			4	173.614	806.431	140008	10868272			4	158.799	291.66	46315.5	3595296
	5	352.265	929.674	327492	25421924			5	176.822	379.009	67017	5202277			5	197.562	429.064	84766.9	6580133			5	147.656	1093.01	161390	12528059			5	165.563	1254.26	207658	16119708			5	106.794	270.21	28856.8	2240040
	6	187.952	1548.95	291128	22599157			6	173.769	445.233	77367.6	6005751			6	277.509	604.486	167750	13021827			6	149.202	989.016	147563	11454787			6	185.054	1605.78	297155	23066999			6	93.293	295.053	27526.5	2136774
	7	199.92	468.103	93583.1	7264496			7	192.049	788.321	151396	11752295			7	250.895	437.323	109722	8517303			7	184.822	1223.42	226115	17552428			7	168.448	1344.41	226464	17579540			7	98.833	366.796	36251.4	2814060
	8	209.672	617.795	129534	10055236			8	238.747	721.72	172308	13375642			8	258.16	548.888	141701	10999720			8	189.485	1835.87	347870	27003847			8	178.123	1622.06	288925	22428184			8	97.209	185.982	18079.2	1403418
	9	338.906	957.418	324475	25187750			9	236.08	1241.29	293045	22747962			9	229.806	744.348	171056	13278422			9	163.244	1346.05	219734	17057096			9	171.36	1677.22	287409	22310449			9	117.757	302.665	35640.8	2766658
	10	331.435	1110.66	368113	28575195			10	225.504	1106.02	249411	19360843			10	173.511	560.398	97235.3	7548007			10	217.787	3904.59	850371		66011057		10	276.427	3026.87	836709	64950549			10	180.055	329.944	59408.1	4611627
	11	331.306	618.919	205051	15917359			11	176.989	728.745	128980	10012226			11	210.432	727.919	153177	11890563			11	199.172	2307.1	459511	35670092			11	258.019	2076.45	535763	41589243			11	115.502	235.76	27230.8	2113822
	12	270.27	952.874	257533	19991303			12	167.753	787.668	132133	10257009			12	156.403	378.294	59166.4	4592862			12	156.919	1030.34	161679	12550557			12	234.302	1615.76	378576	29387392			12	123.863	228.287	28276.2	2194977
	13	193.762	1400.84	271430	21070079			13	189.794	812.372	154183	11968676			13	290.997	564.505	164269	12751607			13	153.299	1924.62	295042	22902992			13	172.558	990.059	170842	13261841			13	142.71	195.771	27938.4	2168753
	14	314.288	1422.51	447079	34705043			14	156.287	412.911	64532.8	5009432			14	280.717	706.743	198395	15400647			14	166.98	2411.71	402707	31260583			14	165.666	843.955	139814	10853258			14	109.937	364.769	40101.6	3112935
	15	360.909	1094.62	395059	30666887			15	236.544	650.571	153888	11945778			15	222.554	436.994	97254.7	7549515			15	146.059	1608.09	234876	18232568			15	188.338	1279.01	240886	18699083			15	112.204	144.507	16214.3	1258657
	16	211.784	1024.72	217019	16846361			16	173.369	1045.79	181308	14074230			16	297.799	573.691	170845	13262023			16	147.205	1834.43	270038	20962014			16	181.588	951.796	172835	13416516			16	121.827	238.901	29104.7	2259287
	17	226.457	1225.99	277635	21551773			17	210.367	788.007	165771	12868160			17	204.635	487.293	99717.1	7740657			17	144.384	1586.17	229018	17777780			17	157.692	1330.08	209742	16281481			17	173.794	289.003	50227.2	3898943
	18	211.153	1276.97	269636	20930794			18	189.266	537.327	101698	7894401			18	206.451	185.22	38238.9	2968343			18	118.117	1487.72	175725	13640884			18	165.318	1099.73	181806	14112892			18	99.387	212.722	21141.7	1641150
	19	222.18	1169.36	259808	20167909			19	204.441	757.978	154962	12029114			19	223.352	655.097	146318	11358080			1	194.071	313.263	60795.2	4719303			19	172.854	2142.16	370281	28743474			19	128.5	184.133	23661.2	1836730
	20	226.161	1161.41	262665	20389685			20	324.092	821.446	266224	20665934			20	237.381	475.132	112788	8755264			2	222.077	614.74	136520	10597506			20	169.015	898.985	151942	11794681			20	146.497	273.788	40109.1	3113518
	1	296.846	1453.94	431595	33503066			21	290.044	983.346	285214	22140039			21	196.957	299.251	58939.4	4575245			3	194.934	765.526	149227	11583937			21	163.089	1059.51	172795	13413382			21	133.125	182.05	24235.4	1881305
	2	266.018	547.137	145548	11298374			22	228.57	968.411	221349	17182514			22	201.053	332.82	66914.6	5194324			4	244.17	722.642	176448	13696949			22	283.912	2391.35	678934	52703032			22	127.238	206.838	26317.6	2042937
	3	223.198	841.817	187892	14585329			23	196.519	625.894	123000	9548017			23	189.743	530.67	100691	7816243			5	185.852	1095.97	203688	15811544			23	207.636	282.123	58578.9	4547256			23	137.144	196.567	26958.1	2092651
	4	250.701	1014.16	254251	19736560			24	319.016	1219.83	389147	30207965			1	158.207	366.574	57994.6	4501896			6	169.286	830.573	140604	10914564			24	138.458	1079.58	149477	11603328			24	120.861	174.622	21105.1	1638306
	5	202.445	2098.62	424854	32979826			1	182.438	541.431	98777.8	7667744			2	178.445	260.334	46455.3	3606146			7	277.368	1088.01	301778	23425893			25	176.306	470.786	83002.6	6443173			25	109.216	178.723	19519.4	1515213
	6	239.326	1584.21	379143	29431440			2	251.9	973.56	245239	19036997			3	189.099	314.547	59480.4	4617237			8	205.008	568.852	116619	9052705			26	147.347	973.388	143426	11133613			1	168.461	261.997	44136.4	3426139
	7	219.23	1043.9	228855	17765132			3	196.867	413.923	81487.5	6325566			4	214.206	472.881	101294	7863070			9	481.255	1053.95	507218	39373427			27	219.449	1336.48	293289	22766941			2	121.17	133.368	16160.3	1254460
	8	247.185	650.853	160881	12488567			4	202.818	826.93	167716	13019188			5	195.733	249.852	48904.3	3796257			10	204.042	708.539	144572	11222556			28	160.564	921.653	147985	11487477			3	142.851	288.219	41172.5	3196062
	9	235.99	1176.29	277593	21548457			5	261.742	1142.3	298988	23209309			6	277.11	728.394	201845	15668485			11	207.159	639.534	132486	10284347			29	162.316	955.167	155039	12035107			4	114.961	156.372	17976.7	1395462
	10	279.12	1265.43	353208	27418155			6	207.572	275.958	57281.1	4446513			7	192.86	500.788	96582	7497294			12	301.741	840.026	253470	19675940			30	160.783	1755.58	282267	21911349			5	140.494	132.161	18567.8	1441349
	11	224.19	708.543	158848	12330779			7	300.401	923.536	277431	21535941			8	270.991	1192.38	323125	25082988			13	189.124	687.965	130111	10100017			31	172.519	1134.71	195759	15196020			6	118.568	196.948	23351.8	1812709
	12	220.261	964.106	212355	16484285			8	188.828	252.308	47642.7	3698324			9	178.226	306.299	54590.4	4237648			14	222.541	350.561	78014.2	6055942			32	184.332	2084.57	384253	29828134			7	82.781	373.433	30913.3	2399678
	13	221.433	1274.48	282213	21907115			9	270.424	1042.69	281968	21888116			10	176.835	290.934	51447.2	3993648			15	207.43	428.808	88947.7	6904674			33	178.664	1721.5	307569	23875428			8	151.186	190.816	28848.8	2239419
	14	330.984	1108.15	366779	28471695			10	184.139	524.167	96519.6	7492445			11	194.11	312.462	60652	4708180			16	206.812	707.844	146390	11363727			34	179.141	1854.82	332273	25793117			9	176.912	214.552	37956.7	2946437
	15	289.451	1406.63	407151	31605564			11	169.337	619.236	104860	8139853			12	192.345	331.16	63697	4944552			17	202.226	1061.66	214695	16665972			35	167.791	1254.93	210566	16345461			10	123.76	158.973	19674.5	1527255
	16	275.281	1209.74	333018	25850893			12	177.505	416.701	73966.4	5741727			13	303.325	828.113	251188	19498741			18	181.537	931.518	169105	13126953			36	272.782	1660.89	453061	35169418			11	126.091	254.312	32066.6	2489206
	17	208.023	681.474	141762	11004445			13	313.928	1010.99	317379	24636894			14	171.733	417.807	71751.4	5569790			19	252.943	863.657	218456	16957903			37	173.666	1394.18	242122	18794975			12	116.571	175.099	20411.6	1584471
	18	214.992	452.505	97284.9	7551858			14	182.413	870.15	158726	12321319			15	164.03	320.793	52619.5	4084653			20	179.038	594.077	106362	8256477			38	165.795	1064.81	176540	13704145			13	112.411	132.463	14890.2	1155873
	19	229.845	766.24	176117	13671255			15	259.436	920.697	238862	18541924			16	178.097	334.389	59553.7	4622930			1	285.599	906.779	258976	20103287			39	224.744	1626.87	365629	28382380			14	134.169	147.424	19779.7	1535423
	20	215.958	708.949	153103	11884813			16	289.838	714.777	207169	16081757			17	338.275	585.615	198099	15377656			2	215.224	614.451	132245	10265637			40	194.857	1651.03	321714	24973428			15	128.951	185.937	23976.8	1861229
	21	295.532	1669.06	493259	38289824			17	293.69	616.538	181071	14055834			18	173.601	546.389	94853.9	7363144			3	220.879	718.398	158679	12317660			41	165.06	1571.94	259465	20141261			16	150.271	184.631	27744.8	2153724
	22	245.639	518.696	127412	9890497			18	198.541	498.698	99012.1	7685933			19	180.545	397.572	71779.5	5571971			4	190.361	234.072	44558.2	3458887			42	156.571	1650.91	258485	20065175			17	114.91	158.665	18232.2	1415295
	1	335.531	783.767	262978	20413994			19	192.023	430.071	82583.5	6410639			20	185.466	587.109	108889	8452615			5	162.239	331.517	53785	4175128			43	170.213	1654.05	281541	21854923			18	116.108	374.81	43518.3	3378163
	2	309.792	829.658	257022	19951624			20	162.471	674.814	109638	8510753			21	192.474	664.063	127815	9921762			6	243.694	300.018	73112.5	5675446			44	239.455	3312.09	793097	61565133			19	97.982	156.845	15368	1192962
	3	250.637	1210.76	303461	23556536			21	267.564	319.271	85425.5	6631253			22	187.849	494.471	92885.9	7210376			7	207.018	341.485	70693.4	5487660			1	201.182	1937.52	389794	30258235			20	155.837	292.468	45577.2	3537988
	4	232.499	1383.14	321579	24962962			22	273.799	1069.03	292700	22721166			23	167.907	504.426	84696.8	6574688			8	191.52	531.91	101872	7907913			2	256.692	2194.55	563321	43728499			21	143.315	328.204	47036.6	3651273
	5	217.439	524.513	114050	8853263			23	237.124	1513.8	358959	27864594			24	275.732	853.241	235266	18262770			9	169.994	504.383	85742.1	6655835			3	233.8	1817.59	424952	32987441			22	91.425	130.349	11917.2	925090
	6	207.971	734.765	152810	11862050			24	181.086	298.562	54065.3	4196885			25	287.455	643.171	184883	14351728			10	383.93	710.041	272606	21161339			4	242.882	2331.06	566173	43949838			23	113.866	220.371	25092.8	1947861
	7	196.029	776.528	152222	11816432			25	231.327	790.679	182905	14198218			26	181.781	402.712	73205.6	5682673			11	211.256	631.015	133306	10348020			5	234.612	3052.02	716040	55583427			24	88.359	178.768	15795.8	1226168
	8	327.351	1169.63	382881	29721563			26	237.343	673.798	159921	12414053			27	173.601	344.815	59860.3	4646729			12	212.016	772.504	163783	12713868			6	223.494	1530.53	342065	26553215			25	139.541	346.025	48284.5	3748138
	9	196.197	437.074	85752.6	6656644			27	220.235	276.674	60933.2	4730016			28	187.437	620.527	116309	9028662			13	200.654	523.757	105094	8158035			7	222.528	1218.34	271114	21045542			26	132.996	184.072	24480.9	1900359
	10	214.386	670.189	143679	11153281			28	180.493	481.397	86888.9	6744857			29	224.512	413.346	92801.1	7203799			14	230.451	859.696	198117	15379095			8	236.802	2333.3	552530	42890799			27	137.737	216.446	29812.7	2314244
	11	229.91	1159.62	266608	20695795			1	304.704	1197.54	364896	28325476			30	200.989	695.136	139715	10845519			15	185.169	474.982	87952.1	6827390			9	229.046	2583.83	591818	45940556			28	126.014	275.174	34675.8	2691749
	12	227.732	1472.33	335297	26027844			2	225.581	199.596	45025.2	3495133			1	149.086	1000.86	149214	11582937			16	198.348	434.149	86112.5	6684587			10	269.072	2514.4	676553	52518226			29	93.654	225.995	21165.3	1642983
	13	209.221	797.268	166805	12948422			3	192.01	288.416	55378.8	4298845			2	136.694	1086	148449	11523535			17	196.248	424.184	83245.4	6462024			11	259.268	2087.84	541310	42019862			30	75.529	323.679	24447	1897731
	14	223.095	984.667	219674	17052470			4	221.021	846.051	186995	14515696			3	149.859	1757.62	263395	20446358			18	173.601	1104.29	191705	14881359			12	232.37	3164.49	735332	57081025			31	92.121	216.425	19937.3	1547655
	15	286.475	1108.13	317451	24642523			5	221.819	1132.88	251294	19507024			4	140.829	715.814	100807	7825279			19	257.014	846.53	217570	16889116			13	246.309	1398.18	344384	26733253			32	148.352	127.383	18897.5	1466941
	16	193.144	769.186	148563	11532409			6	183.405	936.57	171771	13333952			5	121.673	654.744	79664.5	6184054			1	209.272	827.906	173258	13449329			14	244.595	1146.01	280309	21759349			33	100.288	188.241	18878.4	1465455
	17	293.947	672.55	197694	15346251			7	325.109	700.953	227886	17689941			6	160.899	854.184	137438	10668764			2	206.039	892.982	183989	14282356			15	228.84	746.252	170772	13256413			1	215.584	94.349	20340.1	1578926
	18	190.851	619.778	118285	9182018			8	211.359	617.931	130605	10138389			7	98.292	815.14	80121.4	6219520			3	217.774	750.09	163350	12680271			16	215.082	2516.99	541359	42023636			2	198.515	83.968	16669	1293954
	19	190.438	1048.96	199762	15506757			9	300.195	535.022	160611	12467622			8	132.893	1464.36	194604	15106355			4	204.197	814.445	166307	12909762			17	251.565	2278.08	573083	44486278			3	207.43	109.009	22611.8	1755264
	20	205.472	1078.96	221696	17209452			10	193.401	516.966	99981.8	7761204			9	158.477	2144.3	339823	26379174			5	188.583	893.71	168539	13083020			18	270.553	2634	712637	55319333			4	225.53	90.789	20475.7	1589448
	21	344.562	794.256	273670	21243958			11	184.886	533.297	98599.2	7653881			10	143.779	648.246	93204	7235070			6	181.769	572.87	104130	8083191			19	260.788	2303.54	600736	46632843			5	218.728	42.547	9306.11	722398
	22	202.702	740.918	150186	11658347			12	191.289	562.625	107624	8354417			11	123.966	1188.2	147297	11434090			7	174.31	718.875	125307	9727104			20	264.949	1473.57	390421	30306908			6	213.974	90.993	19470.1	1511391
	23	225.581	497.498	112226	8711682			13	314.366	1152.58	362332	28126465			12	142.607	1138.59	162371	12604228			8	191.456	592.699	113476	8808689			1	217.942	2029.4	442292	34333482			7	235.591	102.295	24099.8	1870773
	24	231.777	601.968	139522	10830600			14	192.603	826.535	159193	12357528			13	160.049	471.127	75403.5	5853284			9	188.532	608.259	114676	8901875			2	242.959	329.961	80167.1	6223070			8	196.003	24.552	4812.28	373559
	25	305.181	738.608	225409	17497620			15	194.38	782.65	152132	11809413			14	144.59	983.051	142140	11033759			10	181.962	516.215	93931.4	7291533			3	251.951	2274.64	573098	44487404			9	203.102	82.885	16834.2	1306772
	1	180.854	547.046	98935.3	7679974			16	273.954	488.396	133798	10386228			15	107.58	300.069	32281.3	2505877			11	244.518	755.39	184706	14338049			4	210.612	248.785	52397	4067382			10	232.885	60.648	14124	1096394
	2	211.836	312.748	66251.2	5142832			17	246.837	918.759	226784	17604342			16	134.491	1119.04	150501	11682795			12	183.675	988.275	181522	14090825			5	253.239	1639.18	415105	32222986			11	216.795	116.182	25187.8	1955231
	3	252.144	606.547	152937	11871947			18	216.048	1042.29	225185	17480288			17	124.7	758.326	94563.4	7340597			13	206.709	505.099	104408	8104820			6	327.402	3585.32	1.17384e+06		91120990		12	198.052	87.502	17329.9	1345255
	4	207.417	394.525	81831.2	6352243			19	244.144	740.893	180885	14041410			18	107.618	837.731	90155.2	6998406			14	198.734	434.801	86410	6707679			7	221.317	2092.99	463215	35957644			13	270.192	106.982	28905.8	2243847
	5	206.992	287.5	59510.3	4619555			20	186.715	1071.43	200052	15529303			19	144.191	715.111	103113	8004240			15	202.174	850.608	171971	13349449			8	274.482	942.242	258629	20076351			14	194.793	48.804	9506.61	737962
	6	203.527	272.43	55446.8	4304120			21	213.845	874.93	187100	14523836			20	153.775	567.77	87309.1	6777475			16	184.641	667.497	123247	9567231			9	305.67	3580.32	1.0944e+06		84953734		15	171.952	117.128	20140.4	1563420
	7	240.293	697.179	167527	13004477			22	237.639	1072.15	254786	19778028			21	148.159	522.936	77477.5	6014284			17	200.641	546.19	109588	8506913			10	241.929	486.395	117673	9134490			16	141.859	140.546	19937.7	1547690
	8	210.019	373.44	78429.5	6088186			23	230.901	1065.77	246088	19102896			22	128.462	1099.88	141293	10968011			18	221.188	1102.69	243902	18933181			11	249.413	2895.4	722151	56057807			17	204.828	99.417	20363.3	1580723
	9	262.862	399.51	105016	8151997			1	322.198	809.239	260735	20239873			23	165.795	676.227	112115	8703038			19	304.369	873.353	265822	20634714			12	263.468	2354.24	620267	48148964			18	207.314	144.796	30018.2	2330201
	10	222.721	719.188	160178	12434043			2	211.861	643.566	136347	10584092			24	140.004	957.242	134018	10403308			20	178.393	552.061	98484.1	7644943			13	244.57	2188.84	535323	41555101			19	143.148	109.014	15605.1	1211366
	11	247.082	1121.23	277035	21505135			3	271.274	784.396	212786	16517801			25	101.139	1497.56	151461	11757346			21	179.591	649.189	116589	9050337			14	316.337	261.278	82651.7	6415938			20	168.397	109.854	18499	1436009
	12	186.02	460.824	85722.3	6654296			4	269.471	736.769	198538	15411734			26	154.355	1467.14	226461	17579268			22	167.662	869.123	145719	11311632			15	248.524	1965.94	488584	37926902			21	190.052	101.261	19244.8	1493901
	13	243.603	928.932	226291	17566099			5	261.046	1407.4	367396	28519569			27	132.056	1881.7	248490	19289360			23	213.291	905.831	193206	14997845			16	192.603	2311.82	445262	34563984			22	283.654	116.425	33024.5	2563566
	14	188.016	449.192	84455.4	6555951			6	175.675	394.996	69391	5386558			28	97.905	116.766	11432	887420			24	173.472	418.916	72670.3	5641119			17	266.753	211.49	56415.5	4379317			23	209.04	72.111	15074.1	1170146
	15	207.688	628.221	130474	10128182			7	170.097	650.406	110632	8587963			29	118.298	262.702	31077	2412388			25	189.189	494.252	93506.8	7258579			18	233.98	732.043	171284	13296094			24	267.925	148.921	39899.6	3097253
	16	194.097	539.262	104669	8125066			8	245.742	767.503	188608	14640892			30	97.313	767.682	74705.1	5799072			26	160.667	722.394	116065	9009693			19	294.733	2206.8	650418	50489479			25	298.907	100.717	30105.1	2336943
	17	195.553	566.616	110803	8601234			9	178.303	786.176	140178	10881461			31	84.701	687.094	58197.4	4517643			27	172.687	676.999	116909	9075165			20	335.853	245.177	82343.6	6392022			26	137.119	107.913	14796.8	1148623
	18	220.042	726.662	159896	12412108			10	184.113	708.737	130488	10129265			32	144.23	1045	150720	11699815			28	187.9	745.944	140163	10880340			1	199.108	684.005	136191	10571983			27	161.711	160.395	25937.7	2013441
	19	209.633	872.963	183002	14205733			11	181.975	880.872	160296	12443201			1	179.746	577.573	103816	8058874			29	185.054	757.711	140217	10884524			2	213.163	2928.38	624220	48455813			28	228.969	99.585	22801.8	1770020
	20	180.326	374.57	67544.6	5243227			12	240.305	564.032	135540	10521445			2	213.974	694.237	148549	11531270			30	200.718	1215.99	244072	18946344			3	265.503	2846.97	755881	58676158			29	204.738	100.901	20658.2	1603617
	21	163.63	1088.73	178149	13829060			13	146.291	683.36	99969.4	7760240			3	187.179	601.602	112607	8741281			31	207.739	766.142	159158	12354810			4	259.655	3399.3	882645	68516335			30	202.161	111.569	22555	1750860
	22	233.156	539.151	125706	9758089			14	305.747	724.944	221650	17205821			4	197.214	642.717	126753	9839352			32	216.705	673.76	146007	11333984			5	238.476	2855.55	680981	52861930
	23	260.492	817.122	212854	16523032			15	181.923	720.215	131024	10170881			5	203.527	552.767	112503	8733167			33	173.949	676.395	117658	9133358			6	197.098	2154.72	424692	32967239
	24	209.646	403.97	84690.5	6574203			16	223.984	945.403	211755	16437721			6	191.855	497.76	95498	7413147			34	183.752	725.751	133359	10352119			7	240.28	1673.92	402210	31222008
	25	228.57	691.772	158118	12274105			17	247.842	1044.42	258850	20093560			7	168.474	505.571	85175.5	6611852			35	188.171	357.737	67315.8	5225470			8	197.549	2413.72	476829	37014416
	26	228.596	466.362	106608	8275600			18	209.775	976.665	204879	15904013			8	295.132	1047.85	309255	24006300			36	163.411	250.937	41006	3183141			9	238.128	378.969	90243.3	7005246
	27	177.118	508.633	90088.1	6993196			19	191.804	555.548	106556	8271549			9	356.735	1016.4	362587	28146229										10	228.428	283.84	64837	5033050
	28	208.203	293.279	61061.6	4739980			20	213.24	285.383	60855	4723942			10	199.366	455.176	90746.5	7044307										11	197.511	2066.65	408185	31685830
	29	247.726	823.504	204003	15835981			21	183.611	407.228	74771.4	5804220			11	276.183	622.472	171916	13345186										12	265.323	481.793	127831	9923017
	30	185.801	429.224	79750.2	6190703			22	194.535	570.445	110972	8614295			12	173.137	626.457	108463	8419585										13	277.445	1931.26	535817	41593461
	31	204.081	710.264	144951	11251996			23	199.675	672.552	134292	10424550			13	177.221	298.791	52952.1	4110468										14	242.444	351.885	85312.5	6622482
	32	188.248	457.023	86033.8	6678480			24	211.411	752.062	158994	12342085			14	293.909	893.853	262711	20393257										15	255.159	3433.46	876078	68006614
	33	278.579	716.658	199645	15497719			25	182.902	715	130775	10151567			15	191.701	312.399	59887.1	4648805										16	221.175	1892.83	418647	32497951
								26	364.271	866.956	315807	24514926			16	179.785	566.056	101768	7899879										17	207.353	2706.34	561166	43561164
								27	171.527	896.138	153712	11932077			17	192.744	595.829	114843	8914794										18	233.413	1840.48	429594	33347712
															18	175.302	460.51	80728.2	6266620										19	235.758	2196.12	517752	40191121
	No UV	1h	2h	4h	16h	contrôle GFP									19	275.526	597.544	164639	12780273										20	228.711	2668.64	610350	47379115
Average	1.61653e+07	1.31613e+07	9.75997e+06	1.28133e+07	2.87884e+07	2.01535e+06									20	319.995	655.114	209633	16273036										21	195.578	2468.41	482768	37475423
SD	8.28631e+06	6.34806e+06	5.42089e+06	6.50479e+06	1.66092e+07	811950									21	226.844	537.287	121880	9461087										22	275.448	1859.81	512283	39766549
SEM	828631	628552	521626	681887	1.62089e+06	86554.2									22	205.665	902.522	185617	14408763										23	171.179	435.551	74557.3	5787601
															23	176.268	827.704	145898	11325478										24	326.604	3196.83	1.0441e+06		81049300
Percentage	100	81.417	60.376	79.2645	178.088	12.4671
SD	51.2598	39.2697	33.5341	40.2392	102.746	5.0228
SEM	5.12598	3.88828	3.22682	4.21821	10.027	0.535432
variance	5.87809e+13	4.45532e+13	3.15812e+13	3.15282e+13	2.8619e+14
p-value			9.98277e-06
