# Supplementary material for: XAB2 dynamics during DNA damage-dependent transcription inhibition
Source: eLife. 2022 Jul 26;11:e77094. doi: 10.7554/eLife.77094 (PMC9436415; doi:10.7554/eLife.77094)
Supplement: Figure 6—figure supplement 1—source data 1. [file elife-77094-fig6-figsupp1-data1.xlsx]

## Sheet: 1-23.04.2021
	PLA							IF XAB2						IF CSB
Rawintden	NoUV	1h	2h	4h	16h	CSB-GFP		NoUV	1h	2h	4h	16h		NoUV	1h	2h	4h	16h
	5790978	3530804	4888196	1899498	4544902	1097204		8752661	11938467	16305344	15856792	8097873		5451919	8080545	7123158	11038274	6871047
	6137820	4799806	5791730	2509203	5548272	1121349		11072382	17173666	19016076	17402720	9399985		6714641	10075076	7811195	11241244	8102827
	6169463	5294993	6602973	2863113	5706394	1137035		11836529	17559572	19126061	17774090	10518078		7125022	10105702	9106265	11720748	9457141
	6537483	5879343	7127633	3410737	6506564	1329990		11972155	17651739	20005185	18526164	11157837		7603100	10112105	9449988	11727227	9924243
	7034040	6141823	7887186	3483893	7470963	1546435		12126671	18154584	20014267	18556497	11919943		8492852	10236613	10053213	11775413	10180153
	7156072	6278383	8037121	3751022	7514063	1681718		13483537	18697580	20082413	18727211	12627320		8730237	10806929	10261425	11871314	10799619
	7326638	6404521	8093618	3894690	7771554	1693892		13732068	18700595	20266811	19803627	12890252		9143095	10939985	10310063	11902042	10842810
	8059361	6470900	8161551	3985295	8302400	1799026		13852965	19039739	20655076	19829611	13102051		9173811	11091908	10325367	12020832	11337321
	8067767	7632692	8277012	4044346	8700232	1816367		14183204	19438932	20800628	19881834	13166567		9704984	11225767	10794466	12100412	11440407
	8231532	7765526	8556428	4080465	9031588	1925233		15643947	20857144	20997489	20111380	13379480		9832650	11339473	10858677	12242754	11642578
	8249604	8122212	8588832	4101325	9141227	1971486		15986046	20942388	21095603	20261852	13752678		10405540	11530844	10939934	12279436	11663014
	8651794	8161239	9175262	4203654	9337593	2054166		16084917	21022857	21171578	20413850	14184019		10503280	11544752	11128228	12396639	11670796
	8780278	8469719	9439133	4212487	9547254	2078981		16602241	21152446	21232268	20557656	14633480		10509803	11601418	11133796	12471577	11812558
	9497953	8480074	9452253	4303242	9586389	2116403		17286920	21210492	21253167	20640072	15375587		10687142	11995958	11190222	12785480	12060588
	9549989	8614043	9631238	4389844	9653072	2196272		17390407	21333800	21925007	20648646	16325139		10939729	12391947	11372702	12852655	12114107
	9610280	8822293	9815731	4506813	9702193	2198555		17823722	21564451	21978253	20649538	16388253		10958559	12651634	11574076	12879632	12243961
	9872760	9019361	9970466	4510246	9822030	2230009		17892485	21604259	21992116	21221369	17835987		11117270	12707073	11878387	13121360	12435945
	9889462	9117788	10055785	4574598	9958828	2248300		18080452	21625445	22016341	21438237	17985343		11140847	12835741	11977399	13143827	12505824
	9913234	9161341	10257360	4712640	10016973	2261928		18156120	21667704	22278804	21723623	18124586		11259059	12964571	11980942	13413650	12842608
	9981940	9480333	10306974	4793719	10354218	2262440		18553466	21678294	22462142	21776358	18829722		11305830	13185964	12010921	13512311	12994304
	10094627	9510593	11035398	4877234	10531263	2472502		19033018	22392477	22670553	21860315	19032728		11488967	13222174	12160321	13585937	13178670
	10238615	9751548	11096906	4922302	10533865	2523806		19137362	22660222	22673194	22028071	19175303		11565991	13498571	12358877	13663097	13238024
	10303606	9790602	11139377	4947524	10604128	2654919		19356167	22664322	22842847	22115200	19303862		11581391	13683595	12556564	14124336	13349150
	10500273	9815404	11149152	4959045	10639372	2668425		19386504	23031259	22848652	22291380	19413876		11861846	13749848	12605218	14225688	13972239
	10511447	9870554	11189841	5096688	10791764	2677249		19453660	23039667	23019841	22518805	19461246		11862303	13884435	12730689	14245764	13986097
	10566455	9948629	11351903	5337300	10872507	2708584		19564262	23609515	23277580	22537647	19741553		12337013	14221999	12755523	14379503	14160593
	10671499	10005981	11541710	5398337	11086112	2718384		19728433	23622235	23427779	23009792	19797385		12429340	14287691	12756722	14617738	14280845
	10791442	10089935	11565974	5468828	11423568	2797462		19747659	23692588	23656232	23090762	19867942		12581975	14324304	12835991	14945166	14308779
	10890458	10357211	11673083	5505062	11598034	2803525		19753965	23703666	23817974	23313345	19873143		12594561	14492678	12859856	14975641	14405605
	10950074	10428765	11830537	5614424	11636428	2821120		19822482	24267265	24230444	23355546	19909147		12630385	14546186	13413320	15159090	14583981
	10954343	10496831	11930986	5637915	11734115	2876247		20152146	24314706	24452084	23356550	20026364		12703458	15035238	13496489	15245470	14602843
	11154570	10521346	11973303	5660416	11787648	2879436		20190612	24517108	24634725	23430993	20237063		12999013	15102446	13698516	15382211	14825000
	11391703	10656657	12050738	5715289	11876707	2957458		20449023	24667807	24746335	23653988	20258422		13190799	15265925	13798445	15522493	15163278
	11433242	10795116	12327082	5716196	12007547	3045981		20510568	25173726	24819071	24207767	20309953		13538129	15360940	13879513	15531236	15283313
	11660931	10925868	12470857	5824181	12149954	3112806		20805588	25427404	24874172	24289310	20414866		13710382	16005862	13968536	15772094	15357765
	11699626	11043158	12541193	5913563	12162596	3158887		20923089	25569992	24964388	24378757	20476975		13727132	16012932	14111930	15796346	15541266
	11847252	11215847	12623217	5916059	12300734	3174227		20989005	25987623	25134688	24462990	20635199		13845199	16048588	14414841	15895779	15659134
	11908619	11443450	12629791	5921149	12386264	3245021		21023845	26359020	25216195	24638734	20747538		13872171	16064036	14629170	16085639	15867425
	11958346	11667309	12660724	5926888	12816638	3285200		21121229	26665483	25251651	24767549	22279881		13971162	16092761	14977462	16244983	15968385
	12041699	11735460	12834567	5933065	13267667	3329960		21631092	26802346	25380739	24885034	22327435		14087793	16139544	15145348	16667341	16091607
	12115522	11927323	12971899	6033316	13279840	3387631		21781714	26922982	25494593	24975299	22510243		14187932	16269148	15563891	16781292	16100332
	12137321	12053167	13208753	6044372	13523404	3466921		21830422	27280502	25808315	25097652	22523932		14244165	16317865	15987784	16870701	16571965
	12184016	12885463	13499956	6178147	14033592	3484978		21874104	27404296	26398831	25730594	22701348		14512538	16380618	16107006	16895804	17178767
	12379798	12903473	13727546	6220756	14104889	3499877		21947641	27518960	26545147	25829463	22832824		14886856	16547872	16172763	17760810	17250235
	12417057	12912848	13817225	6259293	14339983	3561496		22029311	27866911	26563347	26164340	22841650		14941759	16566003	16433634	17765934	17269421
	12440896	13052928	13841830	6275702	14386226	3570281		22519557	28316213	26589435	26614384	22972624		14965562	16635501	16442101	17800559	17417684
	12713894	13085593	13908735	6323486	14393995	3585153		22687688	28367901	27031645	27181767	23574463		14969143	17005905	16446570	17888833	17486097
	12745293	13432673	14002807	6652536	14777351	3592867		22707597	28375396	27351195	27627375	23764780		14996084	17062667	16779501	18171854	18023789
	12775784	13534412	14208125	6731818	15097531	3610134		22842221	28384663	27570703	27850551	23954597		15086998	17079970	16795067	18376659	18202167
	13029278	13550783	14219028	6858392	15249545	3621781		22876132	28736166	27771551	27941464	24269130		15099130	17319951	16931527	18548291	18383345
	13245337	13770033	14271700	6894417	15598635	3669910		23177005	28867875	27845562	28628752	24277896		15317264	17408959	17314691	19107848	19007466
	13253554	13844188	14278457	6912368	16268091	3727052		23358459	29020530	28022930	29221645	24611507		15367551	17840228	17349507	20223752	19644829
	13940751	13869776	14299722	6976533	16438183	3743449		23358467	29285545	28584188	30195893	25064275		15485975	17931927	18074394	20338991	19892951
	14011220	13873341	14380479	6991401	16552317	3766294		23565958	29407576	29103251	30343157	25083136		15490044	17992363	18399811	20449575	19923179
	14280772	13964467	14422140	7097377	16678963	3785027		23637063	29619712	29311971	30509943	25313672		15519558	18120488	18593065	20878483	20414961
	14440624	14911793	14458510	7169626	17031129	3821023		23837865	30002126	29475221	30690516	25317179		15642364	18204441	18940451	20909959	20498194
	14491053	15084356	14477893	7284129	17399776	3824006		23869158	30138654	29687551	30715258	25453169		15876940	18237753	19040946	21153326	20524058
	14510235	15181217	14524528	7334659	17499562	3827972		23890782	30159559	29941456	30756135	26603787		16287270	18367158	19047604	21602289	21660825
	14535634	15382012	14584043	7349579	17501853	3837841		23952723	30483612	30665254	31348516	26604362		16337301	18470085	19125510	21910053	21984777
	14549636	15554743	14643125	7350652	17782812	3852872		24450077	30629724	30855978	31690752	26688033		16348423	19613665	19260815	22378388	22241282
	14624950	15567330	14821764	7386250	18033486	3916632		24577647	31036704	31083673	32029339	26782658		16443246	19732658	19841354	22709747	22511652
	14772588	15631595	15021800	7540253	18043607	3933342		24695427	31049551	31506297	32234550	27545888		16768867	20035775	20201597	22744265	22961910
	15149214	15632089	15243670	7591933	19020368	3942632		25407292	31164431	32013172	32414866	27609625		17052220	20035775	20363766	23877277	23179611
	15310147	15911486	15418763	7615208	19215813	3944832		26207112	31185913	32348736	32424300	28431121		17311229	20092473	21325836	24452273	23541761
	15348166	16210816	15465374	7645778	19558556	4086200		26410721	31552463	32484176	33000636	28458002		17493045	20194533	21451892	24617460	24270314
	15349283	16369267	15574701	7688483	20115453	4106167		26417123	31552611	33027387	33319146	29033942		17923950	20745543	21667034	24917496	26339034
	15448979	16564545	15696850	7797350	20507008	4179806		26649458	31552611	33475214	33365472	30722511		18017101	20886195	21708843	25272451	26558841
	15540819	16800265	15719703	7803422	20841819	4182670		26802108	31794583	34228300	33697075	31309263		18120025	20906368	22073511	25527115	26625983
	15678733	16995938	15839379	8034100	23240331	4210131		27278022	31897838	34482705	34169065	32062823		18266439	21145884	22163079	25597245	29729244
	15960993	17005447	16026645	8062944		4415254		27293773	31959100	35739855	34531532	33123523		18419544	22108891	22344086	25646302	30171224
	16020181	17012864	16138337	8065429		4478271		27361489	32365475	36163457	34553970			18461231	22336178	23131748	25730553	31006122
	16278927	17211920	16239631	8130246		4486533		28018773	32779169	36694465	34974362			18573517	22493317	23794489	26339664	34730950
	16370717	17283661	16386708	8323406		4524941		28098632	33057538	36913623	35911469			18630536	22839505	24814162	26550416
	16806617	17889562	16488745	8332601		4526342		28211513	33329808	37134332	36955584			18719122	22929737	25691441	27912413
	17183864	18084849	16517137	8334852		4531263		28213989	33797383	37449647	38137661			18790135	23543040	25752079	30658187
	17217723	18106255	17109083	8416390		4610371		28582687	33923072	37803212	38518194			18932903	23790868	26354486	30696331
	17316385	18906892	17382910	8580918		4640706		28788874	34861378	37874244	41020401			19322632	23902975	26365309	32679526
	17376148	18921419	17650803	8729249		4661689		28902824	35009049	38410258	41129254			19382984	24056061	27171632	32871193
	17561343	19138984	17685486	8839367		4739354		29106891	36035318	39214781	41836761			19627841	24764802	27433155	33364086
	17685013	19186597	17724625	8866759		4744016		29134810	36345488	39434471	42529956			19944664	25042951	28009455	33985332
	18037380	19210690	17749694	8895143		4788418		29224768	36736431	39753893				19987445	25138930	29630102	34146860
	18256752	19374813	17905253	8895951		4918394		29329846	37004851	40297098				20047797	25479759	30418324
	18936559	19507362	18039698	8900786		4919369		29660641	37347727	41290448				20058992	26171535	30483930
	19245269	19538181	18160790	9004170		4931910		30264226	37869506	41685080				20836117	26226757	32002166
	19482797	19624029	18422843	9069033		4943687		30371078	38334262	41761861				20975403	26350313	32960016
	19548980	19901309	18516694	9188557		5097080		30426214	38580433	43861723				21146780	26641943	33945354
	19665698	20678195	18646769	9365952		5134028		30733579	39057431					21168880	26750693	35740176
	19913474	20824517	19047999	9420310		5172440		30881150	39235475					21436749	27132355	36071910
	20228044	21525116	19354169	9422631		5217790		31366132	39543230					22327420	27544660
	20324908	22085171	19644064	9530706		5243756		31480101	39857967					22516961	27862088
	20454672	22402683	19736961	9631359		5266159		31682304	40139047					23177853	27920833
	21621297	22425706	19807432	9658814		5269944		31767245	40428472					23272031	28094369
	23991978	23218005	19909540	9702308		5318572		32420597	40525770					23310920	28425405
	25383057	23866889	19981822	9748158		5397498		32423071	40731479					23713097	28616320
	26098799	24270360	20076099	9796498		5586635		33328185	40951716					24283495	28855635
		24703172	20179252	9923937		5617759		33422493	41042107					24347858	28906521
		25673491	20408822	9975631		5618409		33463256	41828889					25378042	28916135
		25794004	20540787	10034024		5657454		33909842	42690541					25410613	28929601
		27548651	21010825	10104838		5827159		34639417	44726629					25813798	29218233
			21313646	10353627		5857485		34673395	44876129					26615268	29962050
			21328916	10453842		5966475		36444353	45038773					26754286	32556273
			22138910	11473712		6032570		39240454	45413021					27944557	33433156
			22338946	11946483		6037403		39461863	50007651					29317876	34607222
			22887171	11976394		6613872		39729720	53389000					29794662	34634368
			23370616			6712496		42205853	53907942					29847688	35089248
			23795684			6850851			55585622						35100968
			23821873			6851516			56223715						37131358
			25108415			6851973
			25651089			6947106
			26715316			7054060
			26716473			7232697
			26913651			7433727
						8915137
Moyenne	1.35417e+07	1.41323e+07	1.51149e+07	6.9396e+06	1.29121e+07	3.98283e+06		2.42114e+07	3.06102e+07	2.80624e+07	2.68733e+07	2.09289e+07		1.63679e+07	1.97301e+07	1.77517e+07	1.86997e+07	1.69176e+07
SD	4.3374e+06	5.38028e+06	4.86666e+06	2.18985e+06	4.10034e+06	1.57853e+06		6.81095e+06	9.00182e+06	6.67417e+06	6.45468e+06	5.6581e+06		5.41917e+06	6.91566e+06	6.87674e+06	6.26646e+06	5.71059e+06
SEM	445008	540739	459857	214732	493623	148496		664681	870239	719695	721655	676272		528857	668562	733062	696274	672999
Par rapport à NoUV
Moyenne	100	104.361	111.617	51.246	95.3507	29.4115		100	126.429	115.906	110.994	86.4426		100	120.541	108.455	114.246	103.359
SD	32.0299	39.7311	35.9382	16.1711	30.2793	11.6568		28.1312	37.1801	27.5663	26.6597	23.3696		33.1086	42.2514	42.0136	38.2851	34.889
SEM	3.28619	3.99312	3.39585	1.58571	3.6452	1.09658		2.74532	3.59434	2.97255	2.98064	2.7932		3.23107	4.0846	4.47867	4.2539	4.11171

## Sheet: 2-28.04.2021
	PLA							IF XAB2						IF CSB
Rawintden	NoUV	1h	2h	4h	16h	CSB-GFP		NoUV	1h	2h	4h	16h		NoUV	1h	2h	4h	16h
	2289979	5522214	4160829		2860604	2022254		14870143	23848105	19272313	15660444	14891179		6837761	12214725	8744404	11401514	11597757
	2623998	6781802	4194695		3359873	2162726		18195389	25753177	19487536	22718430	16060540		6856279	12220933	10025793	11428972	11864168
	3250684	7052544	4277856		3652455	2816645		18750459	26177280	20944452	22900690	17044389		7962007	12517567	10287997	11605856	11976822
	3988820	7169794	4335562		5346111	3009049		18941288	27121844	21716492	23291960	17147822		8073624	13960385	10948540	12053995	12812241
	4366734	7313825	4438227		5396200	3639468		19130744	27212518	21827229	23712359	17328250		9524058	15423605	11533371	12147619	12817924
	5383594	7644758	4526535		5423700	3686708		19539870	27236283	22003220	24056135	17869450		10120593	16211133	11892042	12185760	12955732
	5764768	7774769	4663605		5596621	3941407		19748808	27428095	22395902	24929307	18347920		10270682	16462285	12180210	12243889	12959277
	6392242	7806872	4694862		5694165	3981181		19937397	28422042	22522821	24937174	18688861		10336588	16824389	12504489	12490618	13080640
	6914681	7943514	5230206		5782750	4044094		20960187	29048239	22957706	25107221	19198213		10710321	16958413	12682972	12501025	13332264
	7059348	8026505	5309619		6189095	4068579		21235881	29480856	23787992	25152489	20078037		11132637	17230297	12961023	12515469	14016043
	7162868	8303647	5384999		6367346	4273043		21598618	29953527	23800441	25167503	20411237		11705297	17429925	13150881	12699793	14023851
	7195993	8358285	5399831		6504316	4362096		22447677	30542606	23983692	25347514	20500026		11851899	17434372	13476962	13373286	14261035
	7608074	8412053	5484006		6707717	4505890		22488538	30785318	25718126	25386258	20703607		11998893	17929688	13654695	13444261	14566720
	8241877	8423545	5805330		6794781	4541476		22880716	31041555	25821170	25701331	20941735		12210793	18116087	13896318	13604431	14999942
	8541377	8524832	5883291		7427576	4575741		23156667	31176088	26093406	26062194	21054580		12218739	18204763	13908686	13738995	16582760
	8605651	8611684	6207981		7472235	4697845		23492402	31681932	26590113	26332330	21206506		12478341	18601595	14584493	13895381	17075067
	9590377	8740728	6393772		7488272	4704950		23635971	32172982	26691348	26472092	21715511		12487068	18631462	14630835	14067009	17087956
	9733635	8841032	6535020		7488452	4705954		23733776	32564125	27237831	27216306	22483674		12487317	18699636	14954097	14116748	17424679
	9802194	9610935	6729731		7491720	4781711		24551516	32610772	27560972	28378688	22743447		13062485	18954268	15368999	14298406	17590749
	10398432	9838813	6757608		7582512	4786107		25043108	32670836	28061612	28464635	23374170		13226589	19135072	15675521	14470945	17732780
	10446516	9884316	6822140		7603673	4900756		25936889	33310043	28699289	28591749	23696692		13706782	19210985	15786711	14483146	17845536
	10538936	9944857	6881270		7635958	4909153		26068049	33830435	29387229	28672973	23815179		13982321	19891624	15903321	14563841	17988780
	10634992	10131891	6890431		7855587	5055338		26220326	33890835	29737413	29008960	24569136		14100272	20000222	17351090	14624719	17991665
	11381270	10280562	6938140		8475428	5080774		26576570	34274154	30493235	29010732	24712381		14105785	20055469	17566279	14750596	18382266
	11419222	10311770	6948157		8738231	5086247		26693497	34347029	32604281	29044452	24795661		14184257	20060146	17701233	14847372	19023867
	11962578	10666301	7077711		8987433	5101544		26786976	34581316	32768633	29107420	24929560		14678728	20079497	17745544	14933951	19178204
	12004213	10703923	7534316		9709433	5112957		26919852	34766290	32783932	29256999	24954357		14772895	20428523	17802225	15187966	19460966
	12012937	10713830	7663087		10097973	5168611		28029367	34906489	32924839	29673191	25895611		14876164	20724379	18315452	15193407	19776983
	12093804	10818473	7738082		10565660	5236556		28172287	35268031	33229950	30261154	25971247		15054239	21316044	18800000	15237924	20047461
	12294403	10898063	7743736		10900406	5247604		28488086	35547682	33499583	30353220	26044142		15271727	21881440	18994949	15508942	20058564
	12346662	11124805	7854988		10995837	5258509		28559822	36717954	33557035	30452999	26504305		15345315	21887629	19267612	15592850	20088826
	12620288	11216490	7864422		11925678	5336990		28848066	36998889	33840840	30638263	26962171		15505605	22435658	19296700	15626382	20112573
	12701522	11594141	7874560		12233044	5537096		29476408	37846020	33993149	30701045	27151609		15558902	22556616	19433004	15689936	20581258
	12887098	11974762	8044623		12431719	5618942		29738784	37862998	34156593	30760681	27306769		15891656	22863895	19804240	15826386	20730437
	12928307	12346853	8169473		12655536	5720358		29999500	37867806	34578464	31021570	27693866		15920968	23233254	19828475	15864412	20934384
	13564433	12400012	8282469		12969812	5763515		30013984	37889168	35288869	31076710	28375288		16022353	23552634	19890577	16025440	21244352
	13740198	12547681	8488115		13024855	5829211		30421904	38455554	36366562	31130229	28957628		16824857	23567033	20140518	16151436	21448444
	13820022	12979362	8533842		13279017	5851306		30468460	38555164	36605798	31169422	29196683		16954597	23637736	20462397	16502001	21727359
	13895004	13064553	8622082		13329418	6059800		30794154	38781703	36620438	31292063	29322827		17142123	23754053	20701962	16544993	21894724
	14070931	13356924	8817060		14936839	6136054		31039289	39671420	37399803	31332593	29398696		17280706	24285753	20785200	16557427	22021326
	14331876	13866646	8938302		16506537	6332309		31281469	40094624	37747754	31395841	30484695		17300013	24345575	20900893	16811873	22287333
	14630157	13867597	8983422		16663737	6478400		31380069	40500512	38136218	31635418	30700375		18991658	24763095	21302327	16829452	22953692
	14762169		9021609		16903237	7100096		31540862	40996888	39313565	31801505	30997791		19862122	25089356	21812128	17052923	24000037
	15354820		9043119			7107215		32638886	41284870	39720687	31820469	31227377		20035755	25484143	21854614	17153495	24047348
	16102666		9129689			7108823		32830023	43628906	39907209	31963857	31488816		20440187	25516976	22269705	17276538	24675073
	16196587		9247924			7249199		33042220	44033679	40393686	32096099	32786093		20492153	25653586	22382182	17658216	25598056
	16217987		9575056			7353463		33109363	44097913	41306713	32115478	33063509		20656972	26032073	22869681	17818301	26251955
	16308133		9723783			7461445		33540938	44220794	41419250	32585923	33811434		21297617	28044732	23147239	17889527	26312168
	16879546		9987467			7464194		33986894	45023997	41542739	33178771	34785847		21589771	28274546	23763886	17976404	26984798
	17511546		10479770			7481184		35332703	46697946	41807035	33547955	35598159		22457456	28289374	23773304	18152246	27298012
	17611838		11292843			7519735		35714833	47003657	41920520	33974085	36170759		22890197	28649497	23919669	18349012	28105683
	18132690		11704155			7746920		36384999	47624243	42188068	34336717	36729230		23499873	29279065	24139227	18707597	28527007
	18357330		11821360			7982529		36671207	48515997	42784375	34361931	36866195		23718919	29376741	24326835	18727530	28553743
	18565732		12116557			7985088		36938388	49614611	43338436	34563871	36998169		23789787	30895864	24342777	18987460	29420108
	19076867		12586992			8003157		37972432	51283413	43399806	35128206	37752206		24071270	32330277	24984878	19016997	32186109
	19263112		12991058			8004648		38369732	51730581	43601083	35359137	39102832		24176372	32430520	26531465	19813520	32788743
	19275376		12993007			8139461		39675918	52326969	43712521	35810956	40049887		24376983	32593628	26793280	20304204	35300243
	19415581		14163733			8298175		39763305	52724949	44847427	36302257	48614017		24820252	35931062	27087726	20663093	35556638
	19507402					8426566		39839858	53730964	45564555	36346631	51158120		25221822	36082426	27331724	20862347	35576313
	19688438					8511161		40514857	54043179	46735584	36531487	56308924		25359928	36742928	27665748	21725079
	19763503					8634934		41000575	54971559	46752275	37394475			25876174	36848354	28038008	22508734
	21680348					8799049		41013403	56527300	46819987	37403289			26373487	36988251	28320213	22615260
	22302044					8829246		42034705	57679954	47405396	37573627			27502785	37091246	28534680	22936591
	22975402					8925217		43314270	60741904	48088256	39018549			28373781	38350211	28603938	23769759
	22978002					9321819		43663497	62552082	48756680	40065289			28547538	39421585	29752869	23847608
						9425999		45211518	64631780	48900601	42679067			29549707	42641854	29889700	23969500
						9641269		46983562		49399981	42864551			32461376	43554036	29977536	25776362
						10389579		48479754		49806839	43516425			32621132		30125633	26693809
								50833106		50175826	43921712			32892477		31565534	27396675
										50819621	45169901					31938834	29165553
										52060041	47307837					33287425	29829112
										53573076	52528169					38041178	30397768
										56171504	53027188					39331550	31542780
										58486353	53641167					40359808	32628333
										60231985	55764493					40378182	32739539
										60738070	62229320					45866883
										61843659						46386222
										65102671						47109335
										68760537						49263800
Moyenne	1.29103e+07	9.89038e+06	7.84486e+06	#DIV/0!	9.04771e+06	6.0741e+06		3.05312e+07	3.95239e+07	3.81049e+07	3.30068e+07	2.7779e+07		1.78548e+07	2.43177e+07	2.2666e+07	1.79412e+07	2.07749e+07
SD	5.26801e+06	2.12169e+06	2.49088e+06	#DIV/0!	3.64497e+06	1.93125e+06		8.21694e+06	9.97337e+06	1.16921e+07	8.34114e+06	8.52388e+06		6.59862e+06	7.6406e+06	9.2158e+06	5.38163e+06	6.31196e+06
SEM	653416	327383	327069	#DIV/0!	555852	234198		989203	1.22764e+06	1.31547e+06	956794	1.10043e+06		794380	933448	1.03686e+06	621417	821747
Par rapport à NoUV
Moyenne	100	76.6086	60.7645	#DIV/0!	70.0815	47.0486		100	129.454	124.806	108.108	90.9854		100	136.197	126.946	100.484	116.355
SD	40.8048	16.4341	19.2938	#DIV/0!	28.2331	14.959		26.9132	32.6661	38.2956	27.32	27.9186		36.9571	42.793	51.6153	30.1411	35.3517
SEM	5.06121	2.53584	2.5334	#DIV/0!	4.3055	1.81405		3.23997	4.02092	4.30859	3.13382	3.60427		4.44912	5.228	5.80718	3.4804	4.60239

## Sheet: 3-07.05.2021
	PLA							IF XAB2						IF CSB
Rawintden	NoUV	1h	2h	4h	16h	CSB-GFP		NoUV	1h	2h	4h	16h		NoUV	1h	2h	4h	16h
	5971526	4609026	3984175	8859626	6591183	1287289		15240163	13039666	1177293	12907283	16954144		1798048	1183387	1918924	1664968	2074098
	6137199	4940682	5104585	4765170	7144134	1318086		17697869	13626129	1329293	13065247	17128227		1869646	1207637	1935107	2230381	2129170
	6793387	5009699	5495817	6101951	7930730	1558745		17877695	13952717	1346048	14017101	17141317		2196206	1295962	2093963	2275224	2202927
	6862111	5236902	5530688	6210437	8093568	1562505		18019470	14056891	1502967	14455851	17872320		2283310	1532695	2236022	2283093	2273630
	6879936	5272441	5543342	6763656	8104182	1991874		18027005	15399303	1540988	14554592	18374285		2357470	1864313	2288730	2306706	2335989
	7306785	5369087	5589306	6930498	8925009	2050199		18250688	15628916	1622557	14807037	18443213		2444291	1876145	2629483	2367826	2343591
	7433005	5372508	5883713	7318921	9544495	2085329		18990893	15733628	1630759	15770907	18518393		2475069	1877729	2793298	2422898	2399171
	7444033	5373445	5900907	7321165	9773758	2236247		19306449	15851697	1648271	15814887	19086990		2602982	1920434	3060283	2448717	2461550
	7642997	5656779	5991479	7471753	9838215	2297580		19522185	16286872	1667881	15904171	19300818		2611962	1938326	3312728	2520084	2468328
	7773262	5840490	6061330	7534129	9921028	2360268		19570777	16330303	1801628	16068801	19562160		2630902	2047895	3357145	2520716	2568836
	7969657	5851991	6304114	7578449	10056791	2420223		20024925	16363553	1885992	16209454	19840617		2811138	2056350	3460638	2561343	2638371
	8062408	6133833	6462977	7843561	10145852	2668833		20295463	16508233	2275402	16369141	19900155		2983968	2079614	3697733	2620435	2643768
	8555809	6139237	6646464	7958321	10197456	2699736		20669346	16561075	2343746	16915093	20345047		3054355	2151695	3860179	2657445	2695552
	8694231	6219073	6674414	8120146	10296898	2701299		20831370	16868948	2351334	17096253	20513161		3139490	2196969	3907187	2718331	2712661
	8911904	6360073	6681273	8373762	10832716	2714943		21193696	16871921	2407004	17109253	20651794		3187865	2202583	3912377	2761322	2722299
	9086772	6488637	6703063	8431155	10852675	2734704		21260710	17062295	2487142	17247165	20764714		3263472	2352475	3967624	2768761	2731374
	9193527	6619428	6770000	8436016	11208145	2786592		21357950	17088459	2716021	17512484	21159418		3297342	2405985	4218249	2868820	2862447
	9311500	6760366	7004239	8639300	11262911	2845870		21553563	17158805	2859503	17605757	21286660		3302509	2431919	4506702	2920058	2890235
	9476801	7004565	7033693	8728500	11559886	2888632		21596956	17452027	2886052	17707967	21561032		3395844	2448415	4666650	2939940	2952654
	9493520	7011983	7103434	8851646	11741923	2907372		21726152	17627458	2897175	17911238	21996410		3476140	2556162	4843155	2997490	2982374
	9532040	7267998	7156452	8885516	11832807	2913083		21744936	17665359	2990597	17930122	22071019		3504953	2565950	5225014	3012110	3011391
	9609343	7420325	7201360	8896525	11902496	2940391		21928056	17817606	3010475	18127826	22368198		3542327	2654072	5292934	3021244	3112536
	9771104	7843380	7266286	8905148	11980377	2944154		21998223	18040073	3079583	18220540	22521644		3580720	2705268	5408488	3090352	3169070
	9788707	8001289	7561901	9186211	12504261	2955824		22391605	18292065	3079652	18248437	22806410		3623015	2720808	5503326	3097144	3175777
	9821857	8054560	7818951	9357060	12735401	2960918		22445202	18431719	3088868	18336019	22929396		3634617	2743499	5515431	3115685	3218073
	9905379	8182793	8025030	9625006	13399533	3041660		22445889	18900083	3137563	18340163	23019813		3640194	2770618	5787515	3193190	3270214
	10005250	8223880	8317182	9786711	13401323	3104347		22933094	18958172	3147672	18344888	23367581		3661298	2782629	5886771	3241164	3293296
	10106011	8228796	8321812	9870052	13421112	3160478		23044510	19004768	3154887	18414221	23466927		3674623	2783228	6020379	3293525	3347217
	10113502	8230649	8345535	9966489	13599965	3177665		23111417	19009025	3181582	18502429	23540776		3722314	2785571	6028322	3330624	3434001
	10326642	8252573	8362142	10130583	13638181	3195393		23632685	19091735	3343153	18648157	23841652		3738057	2889779	6043744	3345212	3458433
	10513172	8469369	8378361	10301365	14025721	3200017		23752397	19111872	3374711	18739089	24410549		3847893	2894292	6056064	3366810	3495560
	10702456	8591793	8402135	10333604	14195699	3278068		23849757	19117773	3375417	18768859	25227835		3886000	2933576	6174460	3402357	3544947
	10896101	8643710	8467148	10577621	14211631	3298184		24015801	19148906	3748772	19153979	25239210		3914734	2968590	6455691	3445369	3613793
	10918212	8659493	8552807	10615605	14227738	3382378		24115584	19182647	3811006	19279168	25328221		3937145	3050788	6571631	3457602	3661976
	10926074	8734396	8626188	10713680	14299036	3412267		24301762	19231115	3828341	19488762	25605310		3988641	3052873	6794458	3475360	3827108
	10961424	8745115	8642245	10786685	14934948	3424580		24690376	19700567	4065458	19593579	25632860		4017786	3057703	7013555	3523958	3853559
	10997600	8816099	8711967	10815376	14941081	3440267		24964116	19702668	4606405	19611587	25638600		4089847	3105251	7024166	3534134	3956316
	11066688	9003605	8717021	10968503	15252591	3511716		25099107	19783496	4631447	19938068	26008682		4091181	3131555	8704482	3572456	4082854
	11214473	9216811	8813004	11074883	15272746	3514852		25243673	20040823	4755551	19996825	26697826		4115001	3137134	8994961	3601191	4169412
	11267452	10092750	8855468	11256903	15470561	3518741		25472559	20073874	5024771	20466208	26937028		4154821	3140036	9033566	3685794	4202973
	11395971	10117311	8914643	11288146	15569261	3804546		25714681	20085617		20727486	27832546		4200082	3147690		3702029	4232085
	11518138	10287961	8925239	11354530	15811382	3822604		25732835	20098859		21067704	28022776		4278351	3172030		3706188	4288526
	11543309	10288218	8966824	11361982	16022346	3867351		26756415	20183067		21250635	28671669		4392865	3177217		3809979	4304002
	11594088	10293623	8985711	11370881	16487471	3875594		26884094	20289597		21543806	29170702		4441677	3303372		3847516	4354475
	11626745	10309200	9260428	11558309	16594508	3940875		27317861	20511007		21835648	29299610		4659465	3350673		3902985	4465694
	11701152	10319369	9297585	11633677	17216561	3967033		27637390	20655599		21895959	29345801		4661024	3408139		3905528	4506881
	12020670	10353127	9450903	11804677	17458076	4109328		27700056	21058946		22820866	29650934		4776233	3424805		3912958	4520745
	12027738	10390182	9451969	11886728	17818594	4305498		27780820	21415594		22863980	29800756		4805374	3466397		3934364	4684071
	12068339	10399957	9490609	11920229	18580001	4484654		27809963	21578253		23681514	30197666		4819410	3504381		3997089	4835028
	12094521	10410558	9745252	11993088	19037506	4518427		27876336	21959184		24525109	30284407		4936953	3561074		4230168	4961789
	12155713	10551995	9747559	12087544	19133204	4627997		28773517	22031154		24941220	30682998		4971960	3612878		4656361	4985680
	12179843	10731091	9769573	12090589	19287971	4633851		29052516	22041741		25376348	30791811		5050245	3751773		4669404	5075405
	12228105	11375265	9794347	12170909	19492015	4643744		29600061	22049685		26059517	31020085		5064548	3775144		4669698	5162135
	12351537	11435491	10172623	12385404	19888507	4699595		29654917	22931123		26244182	31141969		5126715	3783561		4693509	5261085
	12383575	11759353	10345525	12419668	20323283	4700588		30130254	22941617		26315497	31676027		5271596	3804223		4776469	5313450
	12411630	11782432	10441771	12458641	20361180	4723722		30718893	23029350		26317791	32323472		5608912	3827327		4796444	5315181
	12413947	11812285	10564000	12730577	20682657	4724351		30988078	23092515		26377501	32541938		5696359	3841777		4947889	5421156
	12454449	12009045	10857192	12738494	20878678	4912706		31093668	23593413		27294986	34063424		5750987	3858068		4967269	5574172
	12676329	12083629	10905540	12806880	22900613	5015887		31202347	23734865		27418860	34198529		5760910	3872135		5310395	5576979
	13150511	12232322	11208343	13024887	23997065	5073436		31908319	23772440		27687460	34353973		5768308	4050681		5320000	5635471
	13160631	12277408	11244067	13129143	24629826	5139026		32254827	24762286		28254424	35276754		5805323	4172832		5447332	5821837
	13217579	12504818	11245169	13149720	24800894	5139646		32747238	25491661		29071927	35746447		5997465	4247256		5636002	5866543
	13355030	12653772	11258880	13329360	24870331	5180198		32941675	26577907		29427119	35895518		6029996	4451267		5695662	5972573
	13684648	12770647	11377743	13935108	24968825	5237453		33404504	26625589		29556616	36691453		6288504	4465017		5715959	6066543
	13727267	12961706	11405173	14074231	25487559	5435462		33775238	26755068		30486642	38604959		6392101	4519673		5769685	6246993
	14136607	13012546	11513076	14210028	25895992	5455129		33965361	26820564		30821416	38727731		6413542	4525165		5781954	6274541
	14277346	13050131	11536321	14424587		5544277		34704316	26896764		31305660	38926542		6421153	4634718		6054381	6292619
	14678985	13154051	11636121	14716600		6108265		34793196	27156307		31798804	39907402		6426359	4668220		6285473	6501708
	14691214	13199657	11783413	15217738		6465032		35611261	27236817		32390558	41030418		6491077	4679384		6353931	6540139
	14867373	13296240	11831479	15366906				36617473	27597948		32900180	42787480		6619139	4818748		6920713	7014561
	14876595	13419762	11937187	15512835				36673945	28754829		33526883	43568742		6680628	4868476		7073425	7181087
	15009308	13763420	12167954	16108122				36916832	28940811		33723298	43618539		6692433	4937527		7414367	7197482
	15296243	13892762	12263020	16458380				39498268	29041267		36373959	44359963		6703911	4977252		8607726	7330264
	15487471	13947723	12410361	16666401				40705602	29195238		36438832	46655156		6809754	5223993			7612795
	15597469	14261009	12453341	16896801				42808661	32205704		51424345	50733320		7045326	5256315			7653273
	15686984	14511479	12505985	17124203				43180963	33350602			51951081		7225301	5298842			7783425
	15694580	15303730	12550884	17488519				48388337	33650737			53609007		7701884	5906761			7824167
	15797210	15679716	12594253	17934623				51092039	36242190			58072574		7730673	5910353			8512755
	15936142	16328110	12680832	18232413					36506608						5946010
	16072885	16485822	12848131	18236850					37713774						6292549
	16383262	16534300	13144563	18245085					40844090						7452451
	16562199	16536234	13460769	18791363					41181017						7889179
	17394623	17464273	13478078	18928734
	17468458	20514783	13533262	19305616
	17801876		13602091	20505343
	18615870		13752871	20732124
	18751826		13764921	20799635
	19270122		14268455	21386751
	20048859		14327513	23424267
			14403415
			14443497
			15072439
			15085290
			15121802
			15123212
			15234373
			15723851
			15740361
			15752278
			17313628
			17420351
			17495325
			17707325
			19225730
			20681099
			23504990
			23880300
			24856422
			27166526
Moyenne	1.19886e+07	1.01478e+07	1.10719e+07	1.22439e+07	1.51131e+07	3.60359e+06		2.71616e+07	2.20777e+07	2.82032e+06	2.24126e+07	2.90807e+07		4.50082e+06	3.4675e+06	4.90503e+06	3.94757e+06	4.41224e+06
SD	3.23516e+06	3.48645e+06	4.36305e+06	4.04166e+06	5.07318e+06	1.17938e+06		7.32153e+06	6.229e+06	1.01369e+06	6.86851e+06	9.40387e+06		1.49675e+06	1.33843e+06	1.90399e+06	1.4193e+06	1.6802e+06
SEM	342926	380403	417904	428415	624465	141981		829000	687879	160278	793107	1.06478e+06		169474	147805	301047	166117	190245
Par rapport à NoUV
Moyenne	100	84.6452	92.3532	102.129	126.062	30.0584		100	81.2828	10.3835	82.5157	107.065		100	77.0416	108.981	87.7079	98.032
SD	26.9852	29.0813	36.3932	33.7124	42.3165	9.83749		26.9554	22.9331	3.73205	25.2875	34.6219		33.2551	29.7375	42.3031	31.5343	37.331
SEM	2.86043	3.17303	3.48584	3.57351	5.20881	1.1843		3.0521	2.53254	0.590089	2.91995	3.92016		3.7654	3.28396	6.68871	3.69082	4.2269

## Sheet: Moyenne des 3
	PLA							IF XAB2						IF CSB
Rawintden	NoUV	1h	2h	4h	16h	CSB-GFP		NoUV	1h	2h	4h	16h		NoUV	1h	2h	4h	16h
	5790978		4888196		4544902	1097204		8752661	11938467	16305344	15856792	8097873		5451919	8080545	7123158	11038274	6871047
	6137820	4799806	5791730		5548272	1121349		11072382	17173666	19016076	17402720	9399985		6714641	10075076	7811195	11241244	8102827
	6169463	5294993	6602973		5706394	1137035		11836529	17559572	19126061	17774090	10518078		7125022	10105702	9106265	11720748	9457141
	6537483	5879343	7127633		6506564	1329990		11972155	17651739	20005185	18526164	11157837		7603100	10112105	9449988	11727227	9924243
	7034040	6141823	7887186		7470963	1546435		12126671	18154584	20014267	18556497	11919943		8492852	10236613	10053213	11775413	10180153
	7156072	6278383	8037121		7514063	1681718		13483537	18697580	20082413	18727211	12627320		8730237	10806929	10261425	11871314	10799619
	7326638	6404521	8093618		7771554	1693892		13732068	18700595	20266811	19803627	12890252		9143095	10939985	10310063	11902042	10842810
	8059361	6470900	8161551		8302400	1799026		13852965	19039739	20655076	19829611	13102051		9173811	11091908	10325367	12020832	11337321
	8067767	7632692	8277012		8700232	1816367		14183204	19438932	20800628	19881834	13166567		9704984	11225767	10794466	12100412	11440407
	8231532	7765526	8556428		9031588	1925233		15643947	20857144	20997489	20111380	13379480		9832650	11339473	10858677	12242754	11642578
	8249604	8122212	8588832		9141227	1971486		15986046	20942388	21095603	20261852	13752678		10405540	11530844	10939934	12279436	11663014
	8651794	8161239	9175262		9337593	2054166		16084917	21022857	21171578	20413850	14184019		10503280	11544752	11128228	12396639	11670796
	8780278	8469719	9439133		9547254	2078981		16602241	21152446	21232268	20557656	14633480		10509803	11601418	11133796	12471577	11812558
	9497953	8480074	9452253		9586389	2116403		17286920	21210492	21253167	20640072	15375587		10687142	11995958	11190222	12785480	12060588
	9549989	8614043	9631238		9653072	2196272		17390407	21333800	21925007	20648646	16325139		10939729	12391947	11372702	12852655	12114107
	9610280	8822293	9815731		9702193	2198555		17823722	21564451	21978253	20649538	16388253		10958559	12651634	11574076	12879632	12243961
	9872760	9019361	9970466		9822030	2230009		17892485	21604259	21992116	21221369	17835987		11117270	12707073	11878387	13121360	12435945
	9889462	9117788	10055785		9958828	2248300		18080452	21625445	22016341	21438237	17985343		11140847	12835741	11977399	13143827	12505824
	9913234	9161341	10257360		10016973	2261928		18156120	21667704	22278804	21723623	18124586		11259059	12964571	11980942	13413650	12842608
	9981940	9480333	10306974		10354218	2262440		18553466	21678294	22462142	21776358	18829722		11305830	13185964	12010921	13512311	12994304
	10094627	9510593	11035398		10531263	2472502		19033018	22392477	22670553	21860315	19032728		11488967	13222174	12160321	13585937	13178670
	10238615	9751548	11096906		10533865	2523806		19137362	22660222	22673194	22028071	19175303		11565991	13498571	12358877	13663097	13238024
	10303606	9790602	11139377		10604128	2654919		19356167	22664322	22842847	22115200	19303862		11581391	13683595	12556564	14124336	13349150
	10500273	9815404	11149152		10639372	2668425		19386504	23031259	22848652	22291380	19413876		11861846	13749848	12605218	14225688	13972239
	10511447	9870554	11189841		10791764	2677249		19453660	23039667	23019841	22518805	19461246		11862303	13884435	12730689	14245764	13986097
	10566455	9948629	11351903		10872507	2708584		19564262	23609515	23277580	22537647	19741553		12337013	14221999	12755523	14379503	14160593
	10671499	10005981	11541710		11086112	2718384		19728433	23622235	23427779	23009792	19797385		12429340	14287691	12756722	14617738	14280845
	10791442	10089935	11565974		11423568	2797462		19747659	23692588	23656232	23090762	19867942		12581975	14324304	12835991	14945166	14308779
	10890458	10357211	11673083		11598034	2803525		19753965	23703666	23817974	23313345	19873143		12594561	14492678	12859856	14975641	14405605
	10950074	10428765	11830537		11636428	2821120		19822482	24267265	24230444	23355546	19909147		12630385	14546186	13413320	15159090	14583981
	10954343	10496831	11930986		11734115	2876247		20152146	24314706	24452084	23356550	20026364		12703458	15035238	13496489	15245470	14602843
	11154570	10521346	11973303		11787648	2879436		20190612	24517108	24634725	23430993	20237063		12999013	15102446	13698516	15382211	14825000
	11391703	10656657	12050738		11876707	2957458		20449023	24667807	24746335	23653988	20258422		13190799	15265925	13798445	15522493	15163278
	11433242	10795116	12327082		12007547	3045981		20510568	25173726	24819071	24207767	20309953		13538129	15360940	13879513	15531236	15283313
	11660931	10925868	12470857		12149954	3112806		20805588	25427404	24874172	24289310	20414866		13710382	16005862	13968536	15772094	15357765
	11699626	11043158	12541193		12162596	3158887		20923089	25569992	24964388	24378757	20476975		13727132	16012932	14111930	15796346	15541266
	11847252	11215847	12623217		12300734	3174227		20989005	25987623	25134688	24462990	20635199		13845199	16048588	14414841	15895779	15659134
	11908619	11443450	12629791		12386264	3245021		21023845	26359020	25216195	24638734	20747538		13872171	16064036	14629170	16085639	15867425
	11958346	11667309	12660724		12816638	3285200		21121229	26665483	25251651	24767549	22279881		13971162	16092761	14977462	16244983	15968385
	12041699	11735460	12834567		13267667	3329960		21631092	26802346	25380739	24885034	22327435		14087793	16139544	15145348	16667341	16091607
	12115522	11927323	12971899		13279840	3387631		21781714	26922982	25494593	24975299	22510243		14187932	16269148	15563891	16781292	16100332
	12137321	12053167	13208753		13523404	3466921		21830422	27280502	25808315	25097652	22523932		14244165	16317865	15987784	16870701	16571965
	12184016	12885463	13499956		14033592	3484978		21874104	27404296	26398831	25730594	22701348		14512538	16380618	16107006	16895804	17178767
	12379798	12903473	13727546		14104889	3499877		21947641	27518960	26545147	25829463	22832824		14886856	16547872	16172763	17760810	17250235
	12417057	12912848	13817225		14339983	3561496		22029311	27866911	26563347	26164340	22841650		14941759	16566003	16433634	17765934	17269421
	12440896	13052928	13841830		14386226	3570281		22519557	28316213	26589435	26614384	22972624		14965562	16635501	16442101	17800559	17417684
	12713894	13085593	13908735		14393995	3585153		22687688	28367901	27031645	27181767	23574463		14969143	17005905	16446570	17888833	17486097
	12745293	13432673	14002807		14777351	3592867		22707597	28375396	27351195	27627375	23764780		14996084	17062667	16779501	18171854	18023789
	12775784	13534412	14208125		15097531	3610134		22842221	28384663	27570703	27850551	23954597		15086998	17079970	16795067	18376659	18202167
	13029278	13550783	14219028		15249545	3621781		22876132	28736166	27771551	27941464	24269130		15099130	17319951	16931527	18548291	18383345
	13245337	13770033	14271700		15598635	3669910		23177005	28867875	27845562	28628752	24277896		15317264	17408959	17314691	19107848	19007466
	13253554	13844188	14278457		16268091	3727052		23358459	29020530	28022930	29221645	24611507		15367551	17840228	17349507	20223752	19644829
	13940751	13869776	14299722		16438183	3743449		23358467	29285545	28584188	30195893	25064275		15485975	17931927	18074394	20338991	19892951
	14011220	13873341	14380479		16552317	3766294		23565958	29407576	29103251	30343157	25083136		15490044	17992363	18399811	20449575	19923179
	14280772	13964467	14422140		16678963	3785027		23637063	29619712	29311971	30509943	25313672		15519558	18120488	18593065	20878483	20414961
	14440624	14911793	14458510		17031129	3821023		23837865	30002126	29475221	30690516	25317179		15642364	18204441	18940451	20909959	20498194
	14491053	15084356	14477893		17399776	3824006		23869158	30138654	29687551	30715258	25453169		15876940	18237753	19040946	21153326	20524058
	14510235	15181217	14524528		17499562	3827972		23890782	30159559	29941456	30756135	26603787		16287270	18367158	19047604	21602289	21660825
	14535634	15382012	14584043		17501853	3837841		23952723	30483612	30665254	31348516	26604362		16337301	18470085	19125510	21910053	21984777
	14549636	15554743	14643125		17782812	3852872		24450077	30629724	30855978	31690752	26688033		16348423	19613665	19260815	22378388	22241282
	14624950	15567330	14821764		18033486	3916632		24577647	31036704	31083673	32029339	26782658		16443246	19732658	19841354	22709747	22511652
	14772588	15631595	15021800		18043607	3933342		24695427	31049551	31506297	32234550	27545888		16768867	20035775	20201597	22744265	22961910
	15149214	15632089	15243670		19020368	3942632		25407292	31164431	32013172	32414866	27609625		17052220	20035775	20363766	23877277	23179611
	15310147	15911486	15418763		19215813	3944832		26207112	31185913	32348736	32424300	28431121		17311229	20092473	21325836	24452273	23541761
	15348166	16210816	15465374		19558556	4086200		26410721	31552463	32484176	33000636	28458002		17493045	20194533	21451892	24617460	24270314
	15349283	16369267	15574701		20115453	4106167		26417123	31552611	33027387	33319146	29033942		17923950	20745543	21667034	24917496	26339034
	15448979	16564545	15696850		20507008	4179806		26649458	31552611	33475214	33365472	30722511		18017101	20886195	21708843	25272451	26558841
	15540819	16800265	15719703		20841819	4182670		26802108	31794583	34228300	33697075	31309263		18120025	20906368	22073511	25527115	26625983
	15678733	16995938	15839379		23240331	4210131		27278022	31897838	34482705	34169065	32062823		18266439	21145884	22163079	25597245	29729244
	15960993	17005447	16026645			4415254		27293773	31959100	35739855	34531532	33123523		18419544	22108891	22344086	25646302	30171224
	16020181	17012864	16138337			4478271		27361489	32365475	36163457	34553970			18461231	22336178	23131748	25730553	31006122
	16278927	17211920	16239631			4486533		28018773	32779169	36694465	34974362			18573517	22493317	23794489	26339664
	16370717	17283661	16386708			4524941		28098632	33057538	36913623	35911469			18630536	22839505	24814162	26550416
	16806617	17889562	16488745			4526342		28211513	33329808	37134332	36955584			18719122	22929737	25691441	27912413
	17183864	18084849	16517137			4531263		28213989	33797383	37449647	38137661			18790135	23543040	25752079	30658187
	17217723	18106255	17109083			4610371		28582687	33923072	37803212	38518194			18932903	23790868	26354486	30696331
	17316385	18906892	17382910			4640706		28788874	34861378	37874244	41020401			19322632	23902975	26365309	32679526
	17376148	18921419	17650803			4661689		28902824	35009049	38410258	41129254			19382984	24056061	27171632	32871193
	17561343	19138984	17685486			4739354		29106891	36035318	39214781	41836761			19627841	24764802	27433155	33364086
	17685013	19186597	17724625			4744016		29134810	36345488	39434471	42529956			19944664	25042951	28009455	33985332
	18037380	19210690	17749694			4788418		29224768	36736431	39753893				19987445	25138930	29630102	34146860
	18256752	19374813	17905253			4918394		29329846	37004851	40297098				20047797	25479759	30418324
	18936559	19507362	18039698			4919369		29660641	37347727	41290448				20058992	26171535	30483930
	19245269	19538181	18160790			4931910		30264226	37869506	41685080				20836117	26226757	32002166
	19482797	19624029	18422843			4943687		30371078	38334262	41761861				20975403	26350313	32960016
	19548980	19901309	18516694			5097080		30426214	38580433	43861723				21146780	26641943	33945354
	19665698	20678195	18646769			5134028		30733579	39057431					21168880	26750693	35740176
	19913474	20824517	19047999			5172440		30881150	39235475					21436749	27132355	36071910
	20228044	21525116	19354169			5217790		31366132	39543230					22327420	27544660
	20324908	22085171	19644064			5243756		31480101	39857967					22516961	27862088
	20454672	22402683	19736961			5266159		31682304	40139047					23177853	27920833
	21621297	22425706	19807432			5269944		31767245	40428472					23272031	28094369
		23218005	19909540			5318572		32420597	40525770					23310920	28425405
		23866889	19981822			5397498		32423071	40731479					23713097	28616320
		24270360	20076099			5586635		33328185	40951716					24283495	28855635
		24703172	20179252			5617759		33422493	41042107					24347858	28906521
		25673491	20408822			5618409		33463256	41828889					25378042	28916135
		25794004	20540787			5657454		33909842	42690541					25410613	28929601
		27548651	21010825			5827159		34639417	44726629					25813798	29218233
			21313646			5857485		34673395	44876129					26615268	29962050
			21328916			5966475		36444353	45038773					26754286	32556273
			22138910			6032570		39240454	45413021					27944557	33433156
			22338946			6037403		39461863						29317876	34607222
			22887171			6613872		39729720						29794662	34634368
			23370616			6712496		42205853						29847688	35089248
			23795684			6850851									35100968
			23821873			6851516									37131358
			25108415			6851973
			25651089			6947106
			26715316			7054060
			26716473			7232697
			26913651			7433727
						8915137
	2289979	5522214	4160829		2860604	2022254		14870143	23848105	19272313	15660444	14891179		6837761	12214725	8744404	11401514	11597757
	2623998	6781802	4194695		3359873	2162726		18195389	25753177	19487536	22718430	16060540		6856279	12220933	10025793	11428972	11864168
	3250684	7052544	4277856		3652455	2816645		18750459	26177280	20944452	22900690	17044389		7962007	12517567	10287997	11605856	11976822
	3988820	7169794	4335562		5346111	3009049		18941288	27121844	21716492	23291960	17147822		8073624	13960385	10948540	12053995	12812241
	4366734	7313825	4438227		5396200	3639468		19130744	27212518	21827229	23712359	17328250		9524058	15423605	11533371	12147619	12817924
	5383594	7644758	4526535		5423700	3686708		19539870	27236283	22003220	24056135	17869450		10120593	16211133	11892042	12185760	12955732
	5764768	7774769	4663605		5596621	3941407		19748808	27428095	22395902	24929307	18347920		10270682	16462285	12180210	12243889	12959277
	6392242	7806872	4694862		5694165	3981181		19937397	28422042	22522821	24937174	18688861		10336588	16824389	12504489	12490618	13080640
	6914681	7943514	5230206		5782750	4044094		20960187	29048239	22957706	25107221	19198213		10710321	16958413	12682972	12501025	13332264
	7059348	8026505	5309619		6189095	4068579		21235881	29480856	23787992	25152489	20078037		11132637	17230297	12961023	12515469	14016043
	7162868	8303647	5384999		6367346	4273043		21598618	29953527	23800441	25167503	20411237		11705297	17429925	13150881	12699793	14023851
	7195993	8358285	5399831		6504316	4362096		22447677	30542606	23983692	25347514	20500026		11851899	17434372	13476962	13373286	14261035
	7608074	8412053	5484006		6707717	4505890		22488538	30785318	25718126	25386258	20703607		11998893	17929688	13654695	13444261	14566720
	8241877	8423545	5805330		6794781	4541476		22880716	31041555	25821170	25701331	20941735		12210793	18116087	13896318	13604431	14999942
	8541377	8524832	5883291		7427576	4575741		23156667	31176088	26093406	26062194	21054580		12218739	18204763	13908686	13738995	16582760
	8605651	8611684	6207981		7472235	4697845		23492402	31681932	26590113	26332330	21206506		12478341	18601595	14584493	13895381	17075067
	9590377	8740728	6393772		7488272	4704950		23635971	32172982	26691348	26472092	21715511		12487068	18631462	14630835	14067009	17087956
	9733635	8841032	6535020		7488452	4705954		23733776	32564125	27237831	27216306	22483674		12487317	18699636	14954097	14116748	17424679
	9802194	9610935	6729731		7491720	4781711		24551516	32610772	27560972	28378688	22743447		13062485	18954268	15368999	14298406	17590749
	10398432	9838813	6757608		7582512	4786107		25043108	32670836	28061612	28464635	23374170		13226589	19135072	15675521	14470945	17732780
	10446516	9884316	6822140		7603673	4900756		25936889	33310043	28699289	28591749	23696692		13706782	19210985	15786711	14483146	17845536
	10538936	9944857	6881270		7635958	4909153		26068049	33830435	29387229	28672973	23815179		13982321	19891624	15903321	14563841	17988780
	10634992	10131891	6890431		7855587	5055338		26220326	33890835	29737413	29008960	24569136		14100272	20000222	17351090	14624719	17991665
	11381270	10280562	6938140		8475428	5080774		26576570	34274154	30493235	29010732	24712381		14105785	20055469	17566279	14750596	18382266
	11419222	10311770	6948157		8738231	5086247		26693497	34347029	32604281	29044452	24795661		14184257	20060146	17701233	14847372	19023867
	11962578	10666301	7077711		8987433	5101544		26786976	34581316	32768633	29107420	24929560		14678728	20079497	17745544	14933951	19178204
	12004213	10703923	7534316		9709433	5112957		26919852	34766290	32783932	29256999	24954357		14772895	20428523	17802225	15187966	19460966
	12012937	10713830	7663087		10097973	5168611		28029367	34906489	32924839	29673191	25895611		14876164	20724379	18315452	15193407	19776983
	12093804	10818473	7738082		10565660	5236556		28172287	35268031	33229950	30261154	25971247		15054239	21316044	18800000	15237924	20047461
	12294403	10898063	7743736		10900406	5247604		28488086	35547682	33499583	30353220	26044142		15271727	21881440	18994949	15508942	20058564
	12346662	11124805	7854988		10995837	5258509		28559822	36717954	33557035	30452999	26504305		15345315	21887629	19267612	15592850	20088826
	12620288	11216490	7864422		11925678	5336990		28848066	36998889	33840840	30638263	26962171		15505605	22435658	19296700	15626382	20112573
	12701522	11594141	7874560		12233044	5537096		29476408	37846020	33993149	30701045	27151609		15558902	22556616	19433004	15689936	20581258
	12887098	11974762	8044623		12431719	5618942		29738784	37862998	34156593	30760681	27306769		15891656	22863895	19804240	15826386	20730437
	12928307	12346853	8169473		12655536	5720358		29999500	37867806	34578464	31021570	27693866		15920968	23233254	19828475	15864412	20934384
	13564433	12400012	8282469		12969812	5763515		30013984	37889168	35288869	31076710	28375288		16022353	23552634	19890577	16025440	21244352
	13740198	12547681	8488115		13024855	5829211		30421904	38455554	36366562	31130229	28957628		16824857	23567033	20140518	16151436	21448444
	13820022	12979362	8533842		13279017	5851306		30468460	38555164	36605798	31169422	29196683		16954597	23637736	20462397	16502001	21727359
	13895004	13064553	8622082		13329418	6059800		30794154	38781703	36620438	31292063	29322827		17142123	23754053	20701962	16544993	21894724
	14070931	13356924	8817060		14936839	6136054		31039289	39671420	37399803	31332593	29398696		17280706	24285753	20785200	16557427	22021326
	14331876	13866646	8938302		16506537	6332309		31281469	40094624	37747754	31395841	30484695		17300013	24345575	20900893	16811873	22287333
	14630157	13867597	8983422		16663737	6478400		31380069	40500512	38136218	31635418	30700375		18991658	24763095	21302327	16829452	22953692
	14762169		9021609		16903237	7100096		31540862	40996888	39313565	31801505	30997791		19862122	25089356	21812128	17052923	24000037
	15354820		9043119			7107215		32638886	41284870	39720687	31820469	31227377		20035755	25484143	21854614	17153495	24047348
	16102666		9129689			7108823		32830023	43628906	39907209	31963857	31488816		20440187	25516976	22269705	17276538	24675073
	16196587		9247924			7249199		33042220	44033679	40393686	32096099	32786093		20492153	25653586	22382182	17658216	25598056
	16217987		9575056			7353463		33109363	44097913	41306713	32115478	33063509		20656972	26032073	22869681	17818301	26251955
	16308133		9723783			7461445		33540938	44220794	41419250	32585923	33811434		21297617	28044732	23147239	17889527	26312168
	16879546		9987467			7464194		33986894	45023997	41542739	33178771	34785847		21589771	28274546	23763886	17976404	26984798
	17511546		10479770			7481184		35332703	46697946	41807035	33547955	35598159		22457456	28289374	23773304	18152246	27298012
	17611838		11292843			7519735		35714833	47003657	41920520	33974085	36170759		22890197	28649497	23919669	18349012	28105683
	18132690		11704155			7746920		36384999	47624243	42188068	34336717	36729230		23499873	29279065	24139227	18707597	28527007
	18357330		11821360			7982529		36671207	48515997	42784375	34361931	36866195		23718919	29376741	24326835	18727530	28553743
	18565732		12116557			7985088		36938388	49614611	43338436	34563871	36998169		23789787	30895864	24342777	18987460	29420108
	19076867		12586992			8003157		37972432	51283413	43399806	35128206	37752206		24071270	32330277	24984878	19016997	32186109
	19263112		12991058			8004648		38369732	51730581	43601083	35359137	39102832		24176372	32430520	26531465	19813520	32788743
	19275376		12993007			8139461		39675918	52326969	43712521	35810956	40049887		24376983	32593628	26793280	20304204
	19415581		14163733			8298175		39763305	52724949	44847427	36302257	48614017		24820252	35931062	27087726	20663093
	19507402					8426566		39839858	53730964	45564555	36346631	51158120		25221822	36082426	27331724	20862347
	19688438					8511161		40514857	54043179	46735584	36531487	56308924		25359928	36742928	27665748	21725079
	19763503					8634934		41000575	54971559	46752275	37394475			25876174	36848354	28038008	22508734
	21680348					8799049		41013403	56527300	46819987	37403289			26373487	36988251	28320213	22615260
	22302044					8829246		42034705	57679954	47405396	37573627			27502785	37091246	28534680	22936591
	22975402					8925217		43314270		48088256	39018549			28373781	38350211	28603938	23769759
	22978002					9321819		43663497		48756680	40065289			28547538	39421585	29752869	23847608
						9425999		45211518		48900601	42679067			29549707		29889700	23969500
						9641269		46983562		49399981	42864551			32461376		29977536	25776362
						10389579		48479754		49806839	43516425			32621132		30125633	26693809
								50833106		50175826	43921712			32892477		31565534	27396675
										50819621	45169901					31938834	29165553
										52060041	47307837					33287425	29829112
										53573076	52528169						30397768
										56171504	53027188						31542780
										58486353	53641167						32628333
										60231985	55764493						32739539
										60738070	62229320
										61843659
										65102671
										68760537
	5971526	4609026	3984175	8859626	6591183	1287289		15240163	13039666	1177293	12907283	16954144
	6137199	4940682	5104585	4765170	7144134	1318086		17697869	13626129	1329293	13065247	17128227
	6793387	5009699	5495817	6101951	7930730	1558745		17877695	13952717	1346048	14017101	17141317
	6862111	5236902	5530688	6210437	8093568	1562505		18019470	14056891	1502967	14455851	17872320
	6879936	5272441	5543342	6763656	8104182	1991874		18027005	15399303	1540988	14554592	18374285
	7306785	5369087	5589306	6930498	8925009	2050199		18250688	15628916	1622557	14807037	18443213
	7433005	5372508	5883713	7318921	9544495	2085329		18990893	15733628	1630759	15770907	18518393
	7444033	5373445	5900907	7321165	9773758	2236247		19306449	15851697	1648271	15814887	19086990
	7642997	5656779	5991479	7471753	9838215	2297580		19522185	16286872	1667881	15904171	19300818
	7773262	5840490	6061330	7534129	9921028	2360268		19570777	16330303	1801628	16068801	19562160
	7969657	5851991	6304114	7578449	10056791	2420223		20024925	16363553	1885992	16209454	19840617
	8062408	6133833	6462977	7843561	10145852	2668833		20295463	16508233	2275402	16369141	19900155
	8555809	6139237	6646464	7958321	10197456	2699736		20669346	16561075	2343746	16915093	20345047
	8694231	6219073	6674414	8120146	10296898	2701299		20831370	16868948	2351334	17096253	20513161
	8911904	6360073	6681273	8373762	10832716	2714943		21193696	16871921	2407004	17109253	20651794
	9086772	6488637	6703063	8431155	10852675	2734704		21260710	17062295	2487142	17247165	20764714
	9193527	6619428	6770000	8436016	11208145	2786592		21357950	17088459	2716021	17512484	21159418
	9311500	6760366	7004239	8639300	11262911	2845870		21553563	17158805	2859503	17605757	21286660
	9476801	7004565	7033693	8728500	11559886	2888632		21596956	17452027	2886052	17707967	21561032
	9493520	7011983	7103434	8851646	11741923	2907372		21726152	17627458	2897175	17911238	21996410
	9532040	7267998	7156452	8885516	11832807	2913083		21744936	17665359	2990597	17930122	22071019
	9609343	7420325	7201360	8896525	11902496	2940391		21928056	17817606	3010475	18127826	22368198
	9771104	7843380	7266286	8905148	11980377	2944154		21998223	18040073	3079583	18220540	22521644
	9788707	8001289	7561901	9186211	12504261	2955824		22391605	18292065	3079652	18248437	22806410
	9821857	8054560	7818951	9357060	12735401	2960918		22445202	18431719	3088868	18336019	22929396
	9905379	8182793	8025030	9625006	13399533	3041660		22445889	18900083	3137563	18340163	23019813
	10005250	8223880	8317182	9786711	13401323	3104347		22933094	18958172	3147672	18344888	23367581
	10106011	8228796	8321812	9870052	13421112	3160478		23044510	19004768	3154887	18414221	23466927
	10113502	8230649	8345535	9966489	13599965	3177665		23111417	19009025	3181582	18502429	23540776
	10326642	8252573	8362142	10130583	13638181	3195393		23632685	19091735	3343153	18648157	23841652
	10513172	8469369	8378361	10301365	14025721	3200017		23752397	19111872	3374711	18739089	24410549
	10702456	8591793	8402135	10333604	14195699	3278068		23849757	19117773	3375417	18768859	25227835
	10896101	8643710	8467148	10577621	14211631	3298184		24015801	19148906	3748772	19153979	25239210
	10918212	8659493	8552807	10615605	14227738	3382378		24115584	19182647	3811006	19279168	25328221
	10926074	8734396	8626188	10713680	14299036	3412267		24301762	19231115	3828341	19488762	25605310
	10961424	8745115	8642245	10786685	14934948	3424580		24690376	19700567	4065458	19593579	25632860
	10997600	8816099	8711967	10815376	14941081	3440267		24964116	19702668	4606405	19611587	25638600
	11066688	9003605	8717021	10968503	15252591	3511716		25099107	19783496	4631447	19938068	26008682
	11214473	9216811	8813004	11074883	15272746	3514852		25243673	20040823	4755551	19996825	26697826
	11267452	10092750	8855468	11256903	15470561	3518741		25472559	20073874	5024771	20466208	26937028
	11395971	10117311	8914643	11288146	15569261	3804546		25714681	20085617		20727486	27832546
	11518138	10287961	8925239	11354530	15811382	3822604		25732835	20098859		21067704	28022776
	11543309	10288218	8966824	11361982	16022346	3867351		26756415	20183067		21250635	28671669
	11594088	10293623	8985711	11370881	16487471	3875594		26884094	20289597		21543806	29170702
	11626745	10309200	9260428	11558309	16594508	3940875		27317861	20511007		21835648	29299610
	11701152	10319369	9297585	11633677	17216561	3967033		27637390	20655599		21895959	29345801
	12020670	10353127	9450903	11804677	17458076	4109328		27700056	21058946		22820866	29650934
	12027738	10390182	9451969	11886728	17818594	4305498		27780820	21415594		22863980	29800756
	12068339	10399957	9490609	11920229	18580001	4484654		27809963	21578253		23681514	30197666
	12094521	10410558	9745252	11993088	19037506	4518427		27876336	21959184		24525109	30284407
	12155713	10551995	9747559	12087544	19133204	4627997		28773517	22031154		24941220	30682998
	12179843	10731091	9769573	12090589	19287971	4633851		29052516	22041741		25376348	30791811
	12228105	11375265	9794347	12170909	19492015	4643744		29600061	22049685		26059517	31020085
	12351537	11435491	10172623	12385404	19888507	4699595		29654917	22931123		26244182	31141969
	12383575	11759353	10345525	12419668	20323283	4700588		30130254	22941617		26315497	31676027
	12411630	11782432	10441771	12458641	20361180	4723722		30718893	23029350		26317791	32323472
	12413947	11812285	10564000	12730577	20682657	4724351		30988078	23092515		26377501	32541938
	12454449	12009045	10857192	12738494	20878678	4912706		31093668	23593413		27294986	34063424
	12676329	12083629	10905540	12806880	22900613	5015887		31202347	23734865		27418860	34198529
	13150511	12232322	11208343	13024887	23997065	5073436		31908319	23772440		27687460	34353973
	13160631	12277408	11244067	13129143	24629826	5139026		32254827	24762286		28254424	35276754
	13217579	12504818	11245169	13149720	24800894	5139646		32747238	25491661		29071927	35746447
	13355030	12653772	11258880	13329360	24870331	5180198		32941675	26577907		29427119	35895518
	13684648	12770647	11377743	13935108	24968825	5237453		33404504	26625589		29556616	36691453
	13727267	12961706	11405173	14074231	25487559	5435462		33775238	26755068		30486642	38604959
	14136607	13012546	11513076	14210028	25895992	5455129		33965361	26820564		30821416	38727731
	14277346	13050131	11536321	14424587		5544277		34704316	26896764		31305660	38926542
	14678985	13154051	11636121	14716600		6108265		34793196	27156307		31798804	39907402
	14691214	13199657	11783413	15217738		6465032		35611261	27236817		32390558	41030418
	14867373	13296240	11831479	15366906				36617473	27597948		32900180	42787480
	14876595	13419762	11937187	15512835				36673945	28754829		33526883	43568742
	15009308	13763420	12167954	16108122				36916832	28940811		33723298	43618539
	15296243	13892762	12263020	16458380				39498268	29041267		36373959	44359963
	15487471	13947723	12410361	16666401				40705602	29195238		36438832	46655156
	15597469	14261009	12453341	16896801				42808661	32205704		51424345	50733320
	15686984	14511479	12505985	17124203				43180963	33350602			51951081
	15694580	15303730	12550884	17488519				48388337	33650737			53609007
	15797210	15679716	12594253	17934623				51092039	36242190			58072574
	15936142	16328110	12680832	18232413					36506608
	16072885	16485822	12848131	18236850					37713774
	16383262	16534300	13144563	18245085					40844090
	16562199	16536234	13460769	18791363					41181017
	17394623	17464273	13478078	18928734
	17468458	20514783	13533262	19305616
	17801876		13602091	20505343
	18615870		13752871	20732124
	18751826		13764921	20799635
	19270122		14268455	21386751
	20048859		14327513	23424267
			14403415
			14443497
			15072439
			15085290
			15121802
			15123212
			15234373
			15723851
			15740361
			15752278
			17313628
			17420351
			17495325
			17707325
			19225730
			20681099
			23504990
			23880300
			24856422
			27166526
Moyenne	1.26713e+07	1.18901e+07	1.2024e+07	1.22439e+07	1.27947e+07	4.44698e+06		2.6855e+07	2.93004e+07	2.70072e+07	2.74429e+07	2.59618e+07		1.69575e+07	2.12454e+07	1.89058e+07	1.8335e+07	1.81309e+07
SD	4.09714e+06	4.67849e+06	5.09632e+06	4.04166e+06	4.94809e+06	1.87673e+06		7.78622e+06	9.70803e+06	1.52937e+07	8.41245e+06	8.80135e+06		5.94148e+06	7.19211e+06	6.6889e+06	5.85142e+06	5.61053e+06
SEM	261224	312595	305109	428415	370875	118695		490486	617707	1.06816e+06	553499	610264		450423	548393	530464	468489	497854
Par rapport à NoUV
Moyenne	100	93.8345	94.8917	96.6269	100.973	35.0948		100	109.106	100.567	102.189	96.6741		100	125.286	111.489	108.123	106.92
SD	32.3339	36.9218	40.2193	31.8961	39.0495	14.8109		28.9936	36.1498	56.9492	31.3255	32.7736		35.0375	42.4125	39.4451	34.5064	33.0858
SEM	2.06154	2.46694	2.40787	3.38098	2.92688	0.936721		1.82642	2.30016	3.9775	2.06106	2.27244		2.65618	3.23392	3.1282	2.76272	2.93589
variance	1.67183e+13	2.17905e+13	2.58794e+13	1.61515e+13	2.4346e+13	3.50804e+12		6.03846e+13	9.38643e+13	2.32756e+14	7.0463e+13	7.70913e+13		3.50983e+13	5.14257e+13	4.446e+13	3.40197e+13	3.12302e+13
t.test inégale		0.0557771	0.107672	0.395615	0.785869	5.57879e-93			0.00204857	0.89708	0.42701	0.254612			4.09522e-09	0.00542829	0.0347988	0.0816035
									**						***	**
