# Supplementary material for: XAB2 dynamics during DNA damage-dependent transcription inhibition
Source: eLife. 2022 Jul 26;11:e77094. doi: 10.7554/eLife.77094 (PMC9436415; doi:10.7554/eLife.77094)
Supplement: Figure 6—figure supplement 1—source data 2. [file elife-77094-fig6-figsupp1-data2.xlsx]

## Sheet: 31.03.2021
	PLA							IF XAB2							IF XPB
Rawintden	NoUV	1h	2h	4h	16h	control		NoUV	1h	2h	4h	16h	control		NoUV	1h	2h	4h	16h	control
	27977434	14526741	31363411	52305708	70248083	10529700		63926448	29535528	25022633	30485988	20705894			74991267	40419493	52351273	53888326	52474598
	32283008	21681138	30551863	25480936	42864883	9840279		42047145	33964394	25558309	26461633	25011826			50702435	43445091	65432936	51514214	66931733
	38470170	35881614	23874403	37097540	52735390			56016258	38309465	21964456	15344019	18715988			77375917	58304510	48024731	35341766	45016784
	36331662	15461903	21164665	41826522	24235720	7576404		73736991	32691972	27585680	16131972	31296644			83776668	45782729	60839634	40800674	70898478
	37483332	20241831	25750301	53539378	12251984			58523710	50923321	27346501	31163512	22548519			65044748	61203257	42391099	55369387	59942506
	36857370	33446301	27477866	29513564	45382708	8612136		62584964	26762965	38766220	29084560	15145860			72801117	37843858	70488570	56305397	23039922
	29700788	23035866	36433486	42346387	40548569	9060792		58683270	31778099	30308245	35010173	34542333			65825107	50013232	55275411	69861338	81994095
	24181167	43779062	52933095	60512019	14425819	9229900		48431925	35527593	22700427	17667833	19737159			52831983	44634835	50059723	37014705	46512148
	24586461	25448386	24062530	29732279	74532998	10332699		46804334	52956327	19331058	34752539	23322574			46978759	70349811	42109538	63008706	32599956
	24506859	19800690	39099448	26411581	36797758	10811524		31322352	27255161	17197877	27942037	29121542			30217779	38370476	47252552	54378454	68697521
	30427681	23470579	35220729	40581129	24884608	9170933		66895696	28811686	21493302	15889963	29580374			76587797	44701486	42326724	32448182	85368620
	36089053	31458624	31226833	23871100	30933465	13226745		54265099	38833406	18544203	15843023	27387364			65525869	47132284	38573338	31211907	76246153
	54607116	30631074	36432882	45552693	45684738	9592740		43010564	27037999	17278985	16507911	30315272			47955200	37295199	25846383	34544476	76593458
	33148241	33204195	29253456	52419341	46112619	8852372		61142585	23833583	22475986	19857662	31422380			63200758	30298194	39318193	40874494	73186161
	29554548	23805615	32908048	30525631	34569842	8698502		52321511	33968401	17045596	31919121	35781849			66746397	38205155	30601447	67880524	83209081
	26431366	27300767	26042278	53406802	44983381	8395897		60693357	26189689	25384869	20137704	21867645			79454738	33767451	47767101	40477026	60392501
	24511539	42594578	35505040	53546642	26580006	6637210		42128767	34235999	20106163	30317752	20352774			49925517	36586330	48901709	65354637	43920876
	34166528	33253811	18999723	40480012	43378635	5544006		41568911	34835305	21681662	32031233	20773280			45553420	42891216	38411260	76741449	53265015
	22468412	33713846	13100199	27783468	46893698	9787485		55338577	44135985	19051107	17720874	20751424			41450460	66390372	26087263	36257711	51316088
	24408370	35802640	25966080	55858159	39794660	12001305		74900017	19719316	17093342	19061041	20267952			84078264	34643794	26388618	46010432	50340825
	30242640	22175898	21708785	55664054	19915970	7659169		41437122	26066444	28787749	36799483	31152596			48970676	46320395	48340631	82539761	63594543
	33805873	23972520	20368601		21506792	9846227		109807056	25588615	24756740	17230922	32683743			100570608	47617718	50610933	34792113	77829645
	24458744	17656034	26860528	29560049	23130103	4728090		58623180	34227996	15585990	25098285	42661304			71138616	39116244	35597524	55936995	109250897
	17273262	22757987	25417429	37795073	16548079	9344390		65718679	37538901	21552902	22962487	27787612			92123198	44923581	36442216	58234852	66352569
	55238162	32807562	43421237	19398924	21076261	6502514		59749701	50681061	18013560	24132026	14726446			70002439	72183222	32453678	42447528	41546078
	28629758	20764476	34820818	34393668	29941740	5504573		73838365	47970600	27599174	21233341	26814967			87989581	63620840	52654970	37619442	88806610
	46334620	13008783	26463996		47276910	9860649		54731770	26871152	20597579	34752996	30948920			51719696	41021191	36390357	91852934	77219856
	32696464	11745763	22751465	17602535	45462516	7745651		43760904	36200445	20572408	16996570	19039847			81481337	48964521	37343853	37180979	51542200
	25103751	20211338	24183647	40829297	24563750	8081047		67632510	28718155	21349143	27204490	27609374			103761178	37389292	36379592	43893621	85272233
	28319733	19712041	23179397	27654119	21732949	9166401		54284153	47574162	16564975	16975975	35124315			74573150	65960375	31565816	44536974	82220999
	17226250	27301574	44738158	25829883	42333533	9325407		59143895	51099516	19857819	19722846	15412253			70428570	73115345	33652410	49065543	47050515
	44054372	46479567	21740151	28844200	45618396	9734350		72460184	45715429	25018929	24354343	31394545			72039939	62484972	52757358	55026598	83823771
	26433934	16970222	31993298	17972663	52434280	11697034		72505491	50823932	30715689	27185912	20646061			87951238	63216958	61203646	68816726	55427894
	26288903	20371074	30441721	23741600	33244236	7092548		55884393	37677606	25977546	37825298	21100936			70576362	49997920	64249703	73920988	47988400
	22942324	17857055	33182734	44074209	53346144	12902834		78496582	28728346	16837672	22946962	35171504			86045718	49633707	35982047	49159822	61043450
	25794842	24137694	32642951	33725114	41881233	6529322		62502976	31636972	16394068	14744753	27401188			73106342	35407559	32037726	31093876	58908009
	49178353	23884759	20772272	24326695	39269894	6606581		64347243	43045896	26349981	20545564	29026024			74183685	58876400	50922359	43469260	78434201
	25711229	20850279	42530919	31285784	34728771	9809686		140022054	48204563	21647149	20604197	17442500			163819985	64661368	42796091	47375863	41398261
	24615179	28126955	26940709	34603166	48381253	6653594		64841454	50229185	15728972	35169853	26557130			67039598	71627026	28326946	69873040	68445059
	17187894	14550211	48456316	27669891	60110787	5729404		56718878	47321965	14935810	14767853	32471696			66154319	63955557	27504785	31947796	71579414
	25702837	18907968	30475986	28444508	64417729	5662595		61492806	31651459	19885799	32754375	36318272			60623586	53508395	39289139	83960188	87503803
	23375954	36455363	42740549	42969812	54191631	9671733		57747160	45681830	29740578	25531405	36999956			63928483	66423142	59340119	67201977	92684372
	23092181	33050802	30730389	21592627	42811528	6007627		78907734	53581543	22102425	28520046	25442068			91367751	73377200	34417473	65711680	57660996
	32058945	28942828	20470218	33020547	57949009	9232555		72646522	33820650	19941676	15898328	38784350			78510239	42745834	38765637	33529656	97133372
	19324253	21678967	20494518	42304599	42839113	7607668		42966776	33790819	18746501	20468408	32597736			46012540	40287842	41076983	49455768	82207217
	21652090	13023692	19732056	29386135	36074762	5878178		73692731	43165413	17096266	16424794	19532605			89573286	51270273	29542151	42071586	51182781
	28719292	10710068	34634118	36367108	19731232	7771322		49518640	32380896	18257772	15054660	30196594			54922680	40291941	34204682	32663693	66589749
	13094282	28694520	25779212	41888715	61297328	5697716		61778680	27950190	18625778	25224934	22647552			73630062	34054791	36623962	57247351	56107440
	15173559	33492944	30481621	24211829	18346237	8809594		93203954	35159292	18711056	14338780	22131555			97928589	38083634	46289408	31088282	70380750
	22671418	34795371	22140368	38368050	20542959	4821222		55128769	18864287	12546953	22830001	25665209			57481991	17883732	25386029	63234801	75006532
	34461817	20578127	36495322	34525007	23859003	2518980		95012452	29311515	16381248	16002906	38957998			106747091	40029473	31175447	30853644	90678658
	17999722	25277509	31485610	26074980	40519352	4235637		60505168	47180345	18269410	14052853	23829710			60879747	61749925	31166234	29048482	51855448
	21180398	41540267	49182070	34872675	44360576	5821103		59159904	44742173	16125247	18019180	24880528			74310972	59558166	32989526	49046567	70378152
	19863962	22865996	30613325	59985395	58624162	8449042		65255952	37116334	15254707	15630708	29402649			70754837	41788506	30026286	30922358	74992250
	34142045	30299436	41466062	40304945	22698086	10808144		60858519	39298602	21654792	17669168	53437996			61929592	51461232	44534505	35099890	114753370
	59956710	42256999	18633675	50963844	65605415	6871209		74740729	40408619	19829657	30660725	26016722			80036206	43031257	36707323	64099103	59702121
	57664583	16040285	40568619	38027354	27792268	10210606		70417261	33738095	26519119	29844248	42593468			86527223	35237512	58855187	62489278	103777365
	20097245	26179353	31687553	55766418	43865867	4630491		59841860	29169311	18369644	23849793	39603319			60461835	31318185	36695226	68057961	93306826
	25545525	38856593	19718390	26946667	28115918	4773952		54338507	27564264	30137067	28009068	20289706			63461118	35269409	64002604	81497465	57378726
	23713712	23050201	22661681	47365886	41522400	8074807		51094844	38291059	18586078	19546256	35570933			53780926	49074869	34546982	46907121	100633108
	30854988	27567396	22212572	47511566	38282667	5826994		60386541	62494162	16888183		65697767			73635598	70800775	36140202		156431387
	40222046	27432671	26281354	52401318	46126297	5824724		54366575	25468276	14400309		35714510			67756822	24250857	27124110		92830800
	18359244	31022025	49941926	27229758	27050866	10734773		65315284	32994041	26492211		31972446			77909503	37497816	54443090		72912098
	37670256	20117172	18181973	23696649	28493057	4656291		71929864	46834177	25286184		29827305			92374564	59584300	53307961		69301738
	32848829	14702045	25304422	38426070	35280782	5765177		88761823	35595065	28025434		52496906			83232201	44529445	57726602		111197219
	53705486	13464338	25776960	28465957	62876737	4854845		104601984	59911418	19239138		40769709			104851720	78816917	39711050		105868686
	21542582	25717409	42892771	37010759	64483401	4082233		70418850	53697578	14654721		18186542			89680675	80400883	26101944		54002249
	14397735	21961441	39264930	24543652	41306599	10705489		59100613	18295897	19461121		46880100			66464261	27511743	35374492		103344317
	15556891	19268278	42765912	22916057	43415905	5871766		63425965		35046171		28484600			59383777		71463890		75487748
	19144991	46763293	32372745	23105937	44703050	5063890		72245697		35508419		34941868			89595716		71787644		86117167
	28670036	36004340	29120632	36463408	31486165	3748661		95985049		31831548		28665848			93776385		55010473		48194888
	25156371	31046267	33853289	34466935	27629078	4781040		59495310		23174772					53533739		35105526
	28989542	31548564	44840887	28686600		2948028		75215458		21321856					98699646		32532177
	13636596	14447609	20195204	59694596		6748887		81913078		34203775					107698299		77708239
	26791556	20323336	36834090	62876196						28903316							64453837
	34412611	15965044	45584934	27283306						14006399							21804394
	32691927	16237026	22206500	35381108						27226207							49835678
	22199377	29403993	38467236	45819176						17305657							22431871
	29150946	24405018	27766953	41429726						14448179							18476497
	19679725	28715294	35088567	32732154						29875229							61599443
	20138949	20778374	58137133	31962814						26046044							45780693
	18608511	21399887	34876146	32119018						23146932							42178631
	19677532	23470022	47634370	43638173						22209319							40628127
	22504722	16743493	54514682	38190512						26995311							49222411
	24891205	22918082	50236154	33740870						26153477							54173598
	23564678	19726443	20971560	40572733						32556722							62129422
	22369593	16597999	31413543	35931051						20029586							33015744
	21228014	21298472	27600903	37851906						21009620							35066095
	17975802	20370042	32849488	32772503						15966017							26592006
	23886648	29173741	27016535	41415423						32254014							73964384
	23423630		25726485	38071661						23020019							46119241
	19382505			54021244						29783998							58302038
	28319926			36455720						20192044							34223274
	27495698			49984535						17690707							40133763
	18029328			38014627
				46236496
				49073310
				49013849
				29173777
				67295690
Moyenne	2.78568e+07	2.5213e+07	3.15396e+07	3.76207e+07	3.92589e+07	7.66093e+06		6.44908e+07	3.7138e+07	2.2297e+07	2.32486e+07	2.9329e+07	#DIV/0!		7.35968e+07	4.90031e+07	4.32443e+07	5.10376e+07	7.168e+07	#DIV/0!
SD	9.78321e+06	8.26757e+06	9.55515e+06	1.11172e+07	1.4408e+07	2.42816e+06		1.70907e+07	1.00558e+07	5.66112e+06	6.87712e+06	9.40732e+06	#DIV/0!		1.9977e+07	1.41761e+07	1.33464e+07	1.60932e+07	2.22885e+07	#DIV/0!
SEM	1.00374e+06	871478	1.00165e+06	1.123e+06	1.698e+06	286162		1.98675e+06	1.21944e+06	583900	887833	1.11644e+06	#DIV/0!		2.32228e+06	1.7191e+06	1.37658e+06	2.07762e+06	2.64516e+06	#DIV/0!
Par rapport à NoUV
Moyenne	100	90.5092	113.22	135.05	140.931	27.5011		100	57.5865	34.5739	36.0495	45.4778	#DIV/0!		100	66.5832	58.7584	69.3476	97.3956	#DIV/0!
SD	35.1196	29.6788	34.301	39.9083	51.7216	8.71658		26.501	15.5926	8.77818	10.6637	14.5871	#DIV/0!		27.1439	19.2618	18.1345	21.8667	30.2846	#DIV/0!
SEM	3.6032	3.12842	3.59572	4.03134	6.09545	1.02726		3.08067	1.89088	0.9054	1.37668	1.73117	#DIV/0!		3.15541	2.33584	1.87044	2.82298	3.59412	#DIV/0!

## Sheet: 14.04.21
	PLA							IF XAB2							IF XPB
Rawintden	NoUV	1h	2h	4h	16h	control		NoUV	1h	2h	4h	16h	control		NoUV	1h	2h	4h	16h	control
	22098872	18399658	36194954	18623610	29216216	6460686		57300365	70214360	87129548	46473302	25563874	89267134		8977938	9191816	13770688	8065317	7041409	955279
	22053261	15266591	49439200	20808319	14946408	4530643		22518996	53510182	46583691	61042978	48238323	110064395		7409385	7172817	9238392	12839796	11113762	1229880
	23147546	17082256	16902890	21863514	36048624	4764596		39138077	53102011	69128238	76641643	20396500	55110126		8716599	5588606	12051090	16704684	5729800	567543
	16742000	23606317	23065388	16670441	22707636	6000677		38950793	62028617	74524955	66683880	20419937	75990981		5103021	7940960	15032120	15344403	6532097	673853
	23349348	15913140	34740415	15320687	34986241	7138546		61081244	83503215	51683818	50841633	41752033	52247791		9112141	10640262	8552477	8796441	7434177	437206
	28397139	25716816	36053950	30379098	36043631	5935437		45000384	66287128	46303339	64964948	30106832	73390760		5915148	9772531	7552717	12901398	6949414	830001
	16580421	21084640	26791953	18136100	24304903	4235414		61370163	66429727	56494884	69632768	59731722	100358872		10082323	12470850	7878045	14923584	11817402	1002899
	18559865	17066468	20929853	25810568	24307374	5126931		57340442	69534222	50344694	75693939	24447862	63073877		9553521	10105024	7795236	10753932	4849861	428385
	32227446	17375218	30461554	13341344	29603817	3939905		45346093	51394563	56965680	28919053	66224929	76611964		7816553	6162991	9027902	5955578	12955504	608293
	25333125	15910380	25524260	25642773	23447578	4666750		90007402	42613499	71025915	39126411	111271312	49965694		13992877	5733181	13020001	6097817	18957825	495665
	26658527	23366825	22190980	12782940	37347604	4359893		69458793	43537601	82265371	59843290	53787456	74329601		10811395	4840279	13087527	9843517	14216723	594441
	19193303	21255480	33111154	18979167	23449915	4768693		62883884	55247839	52907815	45995917	76211358	42435793		11685520	9339327	9052404	8535895	18254885	525733
	17138978	16396479	30305274	14859934	43047677	2083908		41834183	42183818	70997889	65345429	50591969	78996610		6089692	4536976	13118396	14383784	11851641	679223
	29209998	20277505	42103339	19275217	41297490	2226369		63439538	66691562	75360333	48732872	71760920	82169765		9343063	9936210	13445274	9383054	11280892	854255
	35385454	15878910	15832257	19257165	28544862	3221030		52882722	59245543	68152519	48441217	48533058	80914008		5582051	9015992		10367033	12604182	802136
	28158240	23704240	33165394	16677930	8761247	5290945		49420259	54426976	42741392	57825895	47758650	61497210		5035837	6439091	7562679	12534637	7775810	517607
	12141590	18197768	20951466	24951334	41960364	5405023		157203179	44047415	79659608	42095738	47729176	80838727		32036362	4972382	14120912	6615210	9376932	738028
	25832681	19399146	37999126	16377420	14862220	8529895		82115075	45002494	55306189	66940292	53788120	82489857		14318535	6435312	8763955	11246938	10241069	706936
	17022206	20533164	40072826	22206603	31574717	6737300		51865294	84512381	64781326	55693457	39036294	86360461		7997718	10662105	11163217	9550508	6939175	814317
	47039458	21005668	29801859	13365171	24979080	8621437		37966467	83899226	53030173	48171253	56147828	89711724		6337571	12471219	7824238	8238724	10572465	903778
	26217125	22115948	34763472	20632439	39646939	7436728		33921220	50565143	86980524	67994769	41393958	50215910		5598802	5690353	11596963	11808708	7941949	437187
	31949316	29584072	28877480	28946671	24091328	5475903		54791042	38689823	65732090	38367996	52580505	48132614		6743000	5220114	9352511	6883961	12541512	473181
	24462742	21010128	36404456	23416883	27173972	6405659		86336725	54597904	96277904	52409144	30290487	57675241		11570501	6031452	15099140	8865147	6611551	458057
	16648248	19296047	26083011	23734069	15249082	5358636		88492600	54304379	76093224	40714359	43731677	51596156		11359507	6183745	12646647	6634350	10869030	504870
	18885773	13216733	15133372	29870173	46324414	6719948		81643616	50588389	59462269	50586951	43728698	71481583		8667755	6522297	9860184	10128692	8538338	602117
	16892869	22533451	28369051	20335846	26375528	7704141		75183669	72939375	53924070	39550752	34893735	37565928		13311052	9965648	8659574	6930817	7308884	458351
	29224027	13759899	18767364	18201230	30511016	7616267		73483959	72036722	62950168	79673740	74263239	86978304		13677965	8889537	9455403	13779818	15575213	1024349
	25115059	18489012	23849171	34739746	37375606	9180749		48894223	55041800	93706050	47487364	50160408	73946384		8952263	6646575	18884955	8210882	9737362	662020
	34566970	16312034	23469476	18737127	23528085	9830597		56973321	45069912	87466370	79595069	56609023	74787135		10408705	5500916	15365003	13904975	11808938	639930
	20613521	11432493	26002904	29941052	22806511	4932603		78317616	85162049	61513154	40496672	28183333	63855667		12746455	10096587	10528200	7602066	5373826	768764
	36495648	29781169	27975826	15016353	11052039	3103633		39520675	79228523	64162952	34209638	48754444	59356631		7817524	10494339	10397215	7149067	9688440	400552
	32978704	22261183	17678556	20744369	39050631	3896380		63497408	65854974	56980143	42890653	42076197	47361360		11917110	10315848	8733512	8026127	6817409	444199
	32513639	12115413	22713948	16249966	30780677	5345771		38703501	57117774	103468542	38729671	36183356	51466754		7233649	7604948	19113375	7673719	6825377	393034
	20947276	18403701	27415346	19432774	33300637	4660988		54990029	40985122	71471275	46338954	38839223	92109375		10815898	5418733	14189954	9878968	6862363	1106575
	18016783	26028472	37709156	18068871	29352058	4089149		53980791	37857697	62355812	37501127	37282363	70206591		11452161	4766449	8922277	8467320	6497222	558375
	30644744	37884010	38662015	20418578	46103754	4140542		77247003	55507295	58503646	43098971	37876652	68747576		15437258	7559574	10937605	7696881	6538198	545058
	26328383	35430453	38093912	21976364	40308910	8678370		60367444	70505525	35949157	76904930	19544112	87154862		11475516	8814807	5960328	14723818	8226197	834409
	26457993	37710406	20686568	21853396	23019510	3679627		45771811	64599405	41101178	42660689	86849114	53302095		7215259	7906741	6579563	10243235	16367186	453173
	39689044	34755213	26037239	19045809	21150766	7332135		42869669	74095648	50318401	46118388	56416985	62663184		7567723	9192435	8289263	9195204	9172664	442078
	23468436	35749069	26135535	13187664	19048287	5587438		38409759	40127213	39668684	44250068	35527038	79457792		6729737	4975370	7288703	8767093	7775929	636209
	11492258	37772964	25012025	14078651	30470397	6557781		55141263	35634945	70325632	44875410	19660101	75401628		9794064	4161075	13730865	8521519	7977447	502091
	21582376	17927062	56546078	16960905	32839461	6417165		88333917	33910942	37126567	62838198	90942164	61716641		14599233	3949382	5412316	11390975	20719946	357782
	10989312	30302952	20586444	13103841	20003983	7307214		45192182	56211792	63108106	40513255	55281565	71120321		7898358	7632777	10355978	5037618	8226905	730797
	11341298	25787290	35960619	14267467	25850027	7206422		58674512	82323959	84570531	54721829	41553957	77155912		11170486	8836922	15046265	9738936	9370692	532499
	15123600	23671876	22321120	22395614	16634412	6877306		42077198	80994281	61089657	47746995	46923929	45917120		6296483	8343478	8771350	10332673	9392446	326759
	27486507	17137894	35739881	19452105	16857810	4861166		38509708	69352260	89048369	60196418	31421783	63845554		5865014	8042892	15201584	12927470	6144346	370762
	12870478	18219219	27631467	16000415	24810960	7127720		33395520	80087708	44423516	57495892	66616199	77113413		6023794	9891330	6998945	11650151	10436591	480140
	18303210	26985304	27991891	14002854	47046658	8599885		69271086	69022700	76113946	42858977	58369295	96757941		12356394	7388474	15260934	10123321	8393938	699394
	17944626	19061538	24505316	21558959	27060860	8994395		35814078	93240655	77272220	35840007	43558022	72877212		5821811	11150091	11732417	6525231	8520869	682767
	21831874	45059421	18391861	16618957	25392580	23832895		49230045	47403250	44475678	63308599	35124266	86671552		10233379	5196232	7909958	11070454	6544417	499413
	12839894	27973923	36319694	20981935	33791018	12889236		45425072	69550554	67511024	43873374	37260894	74153781		5737175	7102470	10546298	6940384	7277244	457042
	18718874	29614966	24676203	32135676	37139372	9400909		41854737	43832506	56460964	46884411	48728416	66663127		6248697	6627047	9039085	7311160	9189157	563173
	33116261	19502034	18080289	35128952	31654552	4542105		38922181	45926076	55168112	46399467	41200949	60734128		5788313	7044365	9373574	7063523	6015522	390452
	30651489	15674668	25458324	16238434	15335025	6276941		47303541	59250323	48577122	31775800	32067318	58219124		7108268	10089667	6773383	7371529	5929910	500895
	21987251	25155257	36873506	19753596	43100695	12437989		70970665	66564691	56475560	51248599	55923351	62568729		12519774	13165522	8578029	8679486	8889627	361297
	21812222	22040554	40682766	27746317	28633539	10802345		45688110	45251877	46017466	36970350	48108491	111238330		8898834	7322923	6863466	5004741	9656821	1272127
	23440396	24126373	19265359	17130266	11902182	7549181		54429042	72661112	69092439	46837276	58719399	69080726		10480260	14250412	9619663	8366409	9976672	712025
	36907201	13504887	34789232	19494915	22403968	7624732		57675218	43623161	34753928	64596791	41955703	61861591		9936458	7805522	6700371	10495605	7842215	882577
	19476719	26762882	38623067	18530408	28367395	6149262		65697916	36375887	36076938	55337914	56516447	120024364		12270361	6963584	7122765	7063745	10311854	1521036
	21368611	23732011	36832368	15066695	29621483	8881177		65341275	42160610	52356419	75186085	47627647	44366034		11925862	6772285	7644154	14194919	8908933	462833
	39227708	17047348	26578794	16951002	44604937	6895496		57357994	52664251	72987626	47616788	48603849	52742605		9692176	10405826	10229070	6567466	8328183	536710
	22351778	21136104	35494064	18311568	29437120	4880690		57859455	46103980	77736267	50499569	74852882	87979415		10940216	7125684	11895109	6543299	12615330	852053
	17386552	19015710	47065986	18242530	24700599	9476989		44625249	40142106	60486975	50091253	60141877	92441745		7064524	6774879	8572850	7176544	10172780	929874
	23172737	22416999	30859280	11340863	25546219	7934806		53844232	45850637	48616895	38764197	66181187	99500321		10201392	7620270	7189274	5288328	12644003	903858
	20757045	21954446	39361992	13276687	35624995	5429257		50196514	47776231	64408294	62375493	97217820	80134396		8496389	9000404	7959255	11531476	15756972	720392
	22056040	15760381	30644012	21292329	31199715	7185882		55833747	62455072	75233767	70193492	42899563	61508955		9407932	10027792	9445972	9889526	7320249	635132
	26091696	10389616	48111739	18099053	34904934	7613763		39165375	55729099	46592563	53825145	49785414	55496030		6420527	7182960	9122587	7784870	11078480	571660
	14107738	32732148	35924153	20943375	32415881	6631051		85188534	99843301	58854475	43756402	48710331	45051003		16102346	18906465	8147535	7231776	7860044	323890
	12806669	16720525	17184719	20422326	29681374	6143494		62783319	72993510	49317569	49132949	77234548	52494544		12779671	12076678	7966911	8136099	12722694	410519
	10325878	14282248	37779464	10996484	33738155	7392871		59470414	84184651	61435595	70512276	62379093	109340692		11952860	14105576	8563596	10982052	11138073	1272059
	8445317	10888228	49070987	11828703	27230414	6789024		69596934	54291186	60476633	42525245	62956277	121260359		12638080	9069003	8113268	5586461	11859152	1045998
	12481049	20372836	63027173	13410774	41560527	7392117		39513141	46285156	44778742	40021122	50951720	63574188		6402324	6283008	8662738	6975718	9121211	509185
	10665104	12948591	43223950	14464935	29876403	7148404		46303184	85802283	108663592	40193697	66196069	48343407		8945226	13636472	17121515	7022979	12904074	404643
	9684292	18459269	49586072	14545699	30185119	4611160		51616301	54066900	54442602	48705201	58283743	85082229		11700068	8945149	7809921	7535007	10687585	695912
	15826463	11893200	27951197	14550055	22949887	6357512		49471626	42397440	84372487	55822527		102000918		9013699	6866737	15258975	7444930		684275
	9285467	14867939	46172519	29654144	33235470	8576182		59317114	50169438	62369606	72194476		91312548		9441930	8658676	8641426	11209145		914181
	15080903	16402361	24496720	18601764	27945625	3631052		72175439	52830677	54632938	54563594		121399576		12382641	6837471	9252042	11222843		942828
	13107702	26507130	44990171	24488091	38829256	4361322		51934863	87857558	40018469	77323206		65220195		10568490	13438966	7246043	11560073		611311
	11703889	20568611	30488253	23809585	35589926	6194238		48110552	95564552	49112323	47375629		63724423		8512120	11468444	7334715	7690986		569095
	15079758	15345098	34610596	12922858	25863500	4292852		59562461	87210652	48660055	70276420				11972763	15312299	8533766	10704515
	10982675	18708886	36969460	16426220	39510338	6087504		69663515	38481509	85326992	42072214				13709815	7554410	15683246	6675319
	8561603	20186967	39445980	20482095	23841992	5138128		71483090	39374473	73843407	43172019				14495289	7701219	11703784	6904722
	8616171	22797307	52778053	11182701	23309944	4802369		77807873	75633382	57925782	41617063				16716517	11718365	10139309	6411025
	9616946	17670873	48588921	20774614	41460345	5995085			54107719	69851213	72040936					8506079	9969099	11389608
	16249116	23267738	39362795	13906729	23134501	4935613				54298593	68909995						8389827	9211799
	10019261	14212808	41674824	18323742	33146705	6623045				78513010	55364865						13757760	7696950
	14237256	22400892	24043332	13316212	31469720	7453231				67758375	48687554						10350299	6131720
	6066588	31201464	16723767	13755821	32178324	4523856				47956855	82406884						7844817	11988231
	15168530	19435149	25839869	12003919	27637110	6595077				61008096	49088094						8817362	5748805
	12676174	12868564	35092906	11575410	23779448	6478073				42726184							6473379
	15198657			17279811	23457964	3869418				88085168							17452127
	10668235				87465696	6018564				48884488							8009427
	9694809					6312574				51271713							8500014
	8235860					3677312				49258474							7739818
	20180828					7361758
	5820391					4098949
	9051580					3657646
	9740316					6410533
	15402996					3131083
	11727351					4029273
	7892154
Moyenne	1.97339e+07	2.13086e+07	3.19988e+07	1.89858e+07	2.99143e+07	6.35692e+06		5.73777e+07	5.96129e+07	6.22705e+07	5.28912e+07	5.01708e+07	7.27846e+07		9.9656e+06	8.47838e+06	1.01989e+07	9210171	9.75009e+06	658828
SD	8.66803e+06	6.88916e+06	1.00567e+07	5.38594e+06	1.03125e+07	2.65935e+06		1.85045e+07	1.64228e+07	1.5942e+07	1.28713e+07	1.78109e+07	1.95813e+07		3.76596e+06	2.79416e+06	3.08406e+06	2.65051e+06	3.23106e+06	246462
SEM	862501	726181	1.06007e+06	564600	1.07516e+06	265935		2.03113e+06	1.79188e+06	1.64429e+06	1.36435e+06	2.07048e+06	2.20307e+06		413368	304867	319803	280953	375604	27729.1
Par rapport à NoUV
Moyenne	100	107.98	162.152	96.2091	151.589	32.2133		100	103.896	108.527	92.1808	87.4395	126.852		100	85.0764	102.341	92.4196	97.8375	6.61102
SD	43.9246	34.9103	50.9615	27.2929	52.258	13.4761		32.2503	28.6224	27.7843	22.4326	31.0415	34.1271		37.7896	28.038	30.9471	26.5965	32.4222	2.47313
SEM	4.37066	3.67987	5.37181	2.86107	5.44827	1.34761		3.53993	3.12296	2.86574	2.37785	3.60851	3.83959		4.14795	3.0592	3.20906	2.81923	3.769	0.278249

## Sheet: 04.05.21
	PLA							IF XAB2							IF XPB
Rawintden	NoUV	1h	2h	4h	16h	control		NoUV	1h	2h	4h	16h	control		NoUV	1h	2h	4h	16h	control
	26084980	8766047	31949205	49316436	52342920	53820883		30171271	29837936	34694807	24205115	33201926	45972627		5429334	5401957	6936213	4699647	8078178	894329
	29189387	11538473	37963383	44416562	33151230	49980650		26463597	55417228	23681265	35451441	20238585	39020615		5064485	9121345	4558780	7116163	6487293	679765
	24364627	16698320	55106949	47388521	51713869	82756891		30885199	36375860	30455732	37663592	35404899	48886457		7330521	6506018	6040246	7327585	10646640	1297254
	15019468	20453130	35895071	39575049	31300171	64704171		30171205	70002918	23305144	39622017	23516153	47081794		6387834	13862293	4278055	8020281	7513318	924058
	11543175	23781251	31698506	39904717	30983195	65608988		53023300	31179425	24102994	32359779	28686203	45672314		12407427	4652199	4743602	5599226	9721989	791697
	19225387	18504897	36937888	28696226	41670351	57581641		30029768	39514959	24845497	41564794	25584240	45628643		5169080	7770245	4650416	6973218	8621273	970681
	27142266	12592205	32286924	44080744	25997638	70984365		37468296	26937626	28701628	62528018	16988087	66348210		7664647	5904377	5333020	11820017	6711116	1683362
	21747466	20730457	32384466	38344861	32883882	42483527		40189633	43662846	43184787	45679522	33555301	72347124		7421705	9445545	8696209	9116175	11687082	1981921
	22665666	17858549	47704368	35975158	33923331	82207472		44432989	45414741	34591049	47432754	36214401	40418755		9988423	8915865	7497605	8809187	9125651	1029712
	22388677	15645115	45923648	30628181	77145216	47114176		46210197	44021901	42522645	46786073	42462607	64137444		10445282	9480243	10171016	13222033	13243736	1510578
	22246765	13271312	48694517	37769336	66831162	64898599		37886496	44300778	70278100	38605423	23431333	50565334		8205572	9260730	16626344	7620832	9784346	1127146
	20243028	8958680	45305821	62930670	44209397	63836533		62519968	51106217	51366113	46659306	28197261	46165115		12527951	10522939	11613636	9457636	10342686	1079828
	26751429	16085832	53106267	37706298	35643982	78669422		61768258	59339703	38819338	40877481	31851235	61619274		12752358	13844575	8567052	7310339	9944030	1689843
	36077207	14525160	44347124	29549593	33163512	73602766		55216152	44271360	43176825	55744675	33720155	54754194		12368228	10359840	10053255	10826560	10673545	1359511
	32277443	17761550	59849388	23114885	41930251	74671007		61787270	28191659	37419484	16884676	35063116	46948427		11575356	6785911	8332535	3214784	10574424	990714
	40644451	13499589	48108506	68001582	32935128	94946043		40493729	40749289	45458328	43878426	35626295	66537139		8705198	7832661	9572564	7826387	14122147	1896273
	39266774	16184303	49540685	51624657	48938910	102365503		30262273	21944858	76622970	29097398	33264196	36726177		6030739	5166334	16649926	5530756	5711412	731649
	6243820	11492946	57446625	34493069	25280270	57085658		39762371	49614544	28107034	31763707	22720996	37030365		7345845	9127034	5788683	6120590	4079531	808557
	23779085	25111305	45055204	42085432	55398703	48471240		44407088	25261661	24533241	27118622	36986990	33001764		8026975	5410934	4666797	5500083	6681979	391697
	46788600	23578585	41267832	33442334	39418066	44941316		36592145	48141952	34124874	54350650	41390047	24613551		6639414	8771373	6959013	9333049	24942829	445260
	25483347	24906330	41592711	41589211	44757757	54610940		41585909	37907561	57345382	25541089	43934068	32668764		7984142	7911424	11807930	5078302	9056722	732223
	23284381	18746869	37116047	30674077	53547061	67011428		30722401	26383903	72845708	33787970	41434387	61828857		7138862	5774330	14647963	7090315	9789073	1520637
	24266508	24740529	42302746	48788042	48360472	102762770		58115489	33612155	36744302	24846571	56521192	39828807		11420409	7054824	7044003	5261838	12399486	794335
	25327127	29710343	41430758	38299116	50993535	69131609		45145235	33616637	41901588	36753449	37045144	45053257		10864798	7158186	8679993	9248555	10284111	998865
	5436548	37664334	51051297	27784370	61759466	62312187		82132388	81019758	24723806	35115351	49600303	70223011		18275576	15128370	5004680	8488783	9479182	1274864
	11313257	26916865	34245387	36910920	47577671	50487812		58135627	30516932	37651393	22793585	38942123	57056167		12986475	6692626	7361552	5475593	7458237	1294409
	19792999	16839403	43864485	28296108	60807972	70983569		53286590	30763800	22779296	50499270	37534172	60434665		11603462	7401970	4354409	11361672	7188968	1267971
	38970587	19098239	45371515	61916512	39238101	61296631		55318523	49667940	28454654	53077983	33935639	71733011		10868995	11812661	5431870	13041599	7083164	1406196
	28599200	15803295	42497228	41878989	44135375	58915501		49050966	44231605	70524842	51773119	19225002	46275201		10239063	9551971	14458046	10087422	3471506	1007569
	17486253	27479155		33884900	41557772	64021952		40401665	53557197	36674922	56546285	42883290	26775398		7286324	11756796	8236437	12012485	9472876	275206
	33080844	36299710	26001086	47659159	48482722	37226511		46431105	75680048	63770660	36103749	56021687	28376721		9346383	15232034	14569688	7958462	10436534	206089
	21575791	34315162	34553920	54819777	50473165	34918097		45324165	47509421	48892471	50598040	27949108	33055547		12495029	9509049	10533197	10601852	6261309	267093
	24425981	57445051	21473996	15610138	48307021	58220461		60984932	70223681	32516451	50593216	66389975	21724769		11482581	16228259	6456974	9592993	14866348	164374
	51762850	46035605	43932587	17410955	54713108	76138018		61464023	41716679	24474566	52944768	34563722	34508171		14397644	9216288	5131252	11109388	9403941	246317
	13760718	42709193	23785049	19671472	47251150	66874424		101759955	34348086	63907307	38128879	53440017	30682831		22314955	6904873	13700928	7623152	13190674	294848
	8717273	58428274	36427489	28011564	38536996	86025971		49955320	37584307	44474465	43394747	53307665	34917742		7095502	7030769	9277272	8776269	12595790	352125
	20963114	21651674	29579032	51793999	38436869	54493660		59320678	21836072	31514545	39266701	25444123	35738404		4829176	4083430	6620823	7738133	5957661	536153
	20454123	105312752	44893881	38241093	32637236	63263871		34981244	45284117	34160592	39690575	66160617	56653016		4352457	8790070	6929064	7542856	16677796	855505
	16619443	17178876	45209839	38216416	52754351	91504269		23523534	33961227	66877446	45548703	45168974	34047760		3996223	6636655	16083442	10426732	9774795	368109
	16335115	14513272	51144758	39797332	68159596	61237874		20993122	34695916	64809711	45676120	42285616	26907592		6294546	7408744	15648380	9814432	11281668	366861
	16559892	14126446	76476438	33950033	48695595	47321254		20843571	50655056	46494876	28807353	34776078	26084566		4120735	10716088	8407567	5286925	9450714	297584
	27783425	39516506	33740830	37355943	70056603	47610173		27871760	32868227	62697287	32332177	20426562	60735663		4817550	6514800	14174379	5804509	6364195	864442
	30889362	41574478	22187186	38935498	57146923	96107497		23461951	56930646	35558127	18829392	25114411	47121485		6326659	10912391	7644914	2733267	6248866	701033
	29802734	38262132	22739121	28937626	27996424	80643417		28335228	37163792	39014062	22009442	42118399	63015606		7049330	7099644	7828292	3508561	12014484	1464243
	30052560	38467675	39331337	28637777	26812853	62646152		34575439	36739620	39800452	22952373	62346737	35590734		5889142	7356412	8152972	3815301	15507132	814300
	29717903	32723089	20328138	49806693	41050926	66937930		31017355	57094535	49596158	35347325	48134167	51126451		5421217	12579520	10914424	6848255	11750506	914653
	21369580	45656186	21253142	32322285	37474446	41990209		27545842	82384131	42610726	38616853	26372928	55230256		6932434	15966528	8892694	9955627	5726671	1233667
	18300179	45641309	43981924	27394286	39990660	94895465		27717885	59777102	39337991	43981622	21527071	42454587		10877223	11638205	8371314	8969367	4864317	656164
	16961758	42002120	39728271	37657682	29827839	97676059		36388272	45274713	28840320	23236360	15765543	51738637		6418089	10071737	5828734	5167989	3541725	936571
	41824825	26342093	18984336	29932770	60916630	49964316		45072115	42715188	45227383	32785700	41959739	24642881		8023681	7993543	9497013	5413917	9776411	285559
		31217570	32068383	34723295	25493966	46888673		29573359	51976205	34249626	29512647	32646557	41502434		7285005	11788585	6269267	3869906	8023103	494034
		26342093	25944581	39597808	21243050	47173388		34381803	50036546	35330878	15483838	27642453	58998079		7540514	9495466	6054821	3159975	6638508	1041476
		47353974	23017510	36531557	34152809	48236972		32187703	43743487	82666202	17316853	37659490	55030454		8301366	9821787	18150631	2828975	7842238	634253
		39007490	50068739	34365478	23052294	78103024		31506854	38562508	43215298	34175866	45629817	36377078		14085478	7411095	8970188	6178734	10461911	338617
		49155829	41013361	46810190	25475934	70291959		34337210	40105813	35927450	28475130	47005999	51486136		11973945	8606504	8582169	6176532	12105863	583379
		38673942	40011056	35457233	22865432	75092056		61770345	27789764	57514505	24192360	36649977	33748734		13251739	5697186	11302545	5286890	8980809	287767
		19028326	36553000	36615463	21299375	48655550		50373804	46246392	28215385	26937229	41972484	24748594		27605801	9854317	6299216	6109116	9034524	164807
		12506342	66323224	35029694	22928989	64944236		53570028	31683927	63833268	67540981	48004319	42115504		7519516	6291621	11376948	13899059	12306894	466516
		26060253	48646624	42028544	23905088	55030493		134963314	39426538	49404886	16187118	44957141	46237319		8260524	7061574	9038939	4617486	10421503	541097
		38465677	32241476	44280497	26350727	62655907		29963314	51247034	35584357	61072242	27256489	44170460		12330745	10101078	6869243	13336273	5588388	656504
		35301714	42569596	31194379	20574801	58149216		38834870	24176654	27719932	41624683	24464472	47453104		6283393	8464362	5741045	8672952	6189070	689955
		45182983	32519612	52179190	37308727	75269524		49468401	31417421	44117678	36375648	17744838	39959626		7827172	7101016	8996057	8296597	4485353	549331
		42979232	27497494	32748472	21639895	40724170		37728651	29888134	32650473	56050142	27406493	57487037		7420143	6126039	6782344	11391953	5724075	858470
		43963632	38421840	41477814	23185416	31058086		42156044	37090932	28334666	41940520	25985838	45732382		5293956	7682871	5965555	7896028	4938297	724442
		54855049	36580456	45598425		45657938		31498295	63161268	30436714	29484958		39506064		4511310	12043851	6952415	4955830		595393
		38708630	40224049	32033167		36028466		32573764	35771478	27171210	27836428		41901308		6065933	8786802	5026376	4684875		876232
		31558186	38522540	46610595		39940234		27501331	73824288	19052211	38920155		49927437		4337178	15889596	3067292	9333013		1555303
		39619745	23890249	22839030		30601835		34738699	78071828	44118174	36440888		36913005		6471617	17549878	9099969	13877012		775398
		33163306	26105255	33791048		34916733		25652232	38147659	78565318	41927517		30324207		8687104	9092548	16521248	9183620		1155013
		21645499	35589550	40861110		41945460		33414299	61475041	22692529	101579428		48647562		9890622	15443731	4734814	18722399		809746
		22016991	34298472			53136005		43955996	77300561	19616823	56434984		83753606		10854402	15027176	4049903	12459564		1582555
		46159901	39782805			44557332		52299440	46597267	42718799	58372984		43183249		9689604	11853602	10215879	10173150		722436
		45371058	37751992			39022041		50535901	67617523	32182842	36512893		41025182		11319789	16203186	5973246	6961890		745822
		32845456	48276447			74622195		51449297	47423862	28842286	42053096		37094413		13441745	12198488	6739906	8991207		843188
		24183372	26063732			28191415		44814229	42037219	43844240	50334290		61916818		8985570	7628584	8704750	13630966		1044714
		31715902	22862793			48348864		57004367	50287115	55917982	60029146		56573581		10646194	13304350	11841987	11709207		1286617
		19311672	25128751			42216281		44002541	48553146	63280649	34156500		31382908		12012543	10361681	14201996	9059035		481565
			62456976			31622318		52302348	51961740	41149157	30858536		50232245		12185459	15126608	8417098	4849389		861454
			57510645			30979095		57192879	73797377	65722562	35885229		48689883		11007303	13569424	13836818	7713665		790097
			35936526			56606197		57431821		32576349	29422645				11143756		6525615	6695727
			26582028			57095262		44960352		51364546	37313014				8369878		11519110	7162208
			61141856			11628455		55613896		38151977	30765836				17357215		8575058	7185775
			31309030					39661832		40582720	32344470				11191172		9547948	5190196
			40738818					74102171		28081618	31403958				11086968		6329635	6589339
			42337084					44770579		37748229	60009511				6559059		7865876	12196194
			44448700					54347301		46904878	67479086				6346162		8039045	13474188
			72441519					32916601		38076454	68744615				7701423		8676342	17240460
			39843485					33402236		34437704	48779676						7915816	10408719
			34042119					38361716		50498154	46179689						9758223	10732840
			57622235							58027800	20327354						11619343	4386886
			50051041							39895506	50952986						8328562	7982549
			42125092							49498163	42403928						8158060	7816224
			45087982							55991622	25239205						10495260	5000307
			45562202							47892191	31470683						8933589	6527452
			64663776							37955916	35632686						7610446	6720078
			60679807							51258682	46420320						10107873	8000138
			58975173							42150854	34181497						8776425	6511552
			31287415							52498105	33618269						10634845	6834121
			42705829							40876154	34367373						10036880	5292602
			53493313							59117430							12760187
Moyenne	2.44921e+07	2.99161e+07	4.06951e+07	3.81429e+07	4.05749e+07	5.9114e+07		4.42306e+07	4.5575e+07	4.24187e+07	3.95416e+07	3.61478e+07	4.56433e+07		9.28134e+06	9.61845e+06	8.85422e+06	8.09345e+06	9.26263e+06	846050
SD	9.74801e+06	1.53538e+07	1.19836e+07	9.95494e+06	1.38376e+07	1.88063e+07		1.70055e+07	1.47676e+07	1.43117e+07	1.37634e+07	1.18759e+07	1.29765e+07		3.89279e+06	3.23067e+06	3.25975e+06	3.10811e+06	3.56957e+06	427689
SEM	1.37858e+06	1.74973e+06	1.2044e+06	1.18984e+06	1.72969e+06	2.07681e+06		1.80258e+06	1.66148e+06	1.43117e+06	1.38327e+06	1.48448e+06	1.45998e+06		417351	363479	325975	312377	446196	48118.8
Par rapport à NoUV
Moyenne	100	122.146	166.156	155.735	165.665	241.359		100	103.04	95.9036	89.3988	81.7258	103.194		100	103.632	95.3981	87.2014	99.7985	9.11561
SD	39.8005	62.6888	48.9283	40.6454	56.4979	76.7849		38.4474	33.3877	32.357	31.1174	26.8499	29.3384		41.9421	34.8083	35.1216	33.4878	38.4596	4.60806
SEM	5.62865	7.14405	4.91748	4.85806	7.06224	8.47948		4.07542	3.75642	3.2357	3.12742	3.35624	3.30083		4.49667	3.91624	3.51216	3.36565	4.80745	0.518447

## Sheet: Moyenne des 3
	PLA							IF XAB2						IF XPB
31.03.21	No UV	1h	2h	4h	16h	XAB2-GFP		NoUV	1h	2h	4h	16h		NoUV	1h	2h	4h	16h
	27977434	14526741	31363411	52305708	70248083	10529700
	32283008	21681138	30551863	25480936	42864883	9840279
	38470170	35881614	23874403	37097540	52735390
	36331662	15461903	21164665	41826522	24235720	7576404
	37483332	20241831	25750301	53539378	12251984
	36857370	33446301	27477866	29513564	45382708	8612136
	29700788	23035866	36433486	42346387	40548569	9060792
	24181167	43779062	52933095	60512019	14425819	9229900
	24586461	25448386	24062530	29732279	74532998	10332699
	24506859	19800690	39099448	26411581	36797758	10811524
	30427681	23470579	35220729	40581129	24884608	9170933
	36089053	31458624	31226833	23871100	30933465	13226745
	54607116	30631074	36432882	45552693	45684738	9592740
	33148241	33204195	29253456	52419341	46112619	8852372
	29554548	23805615	32908048	30525631	34569842	8698502
	26431366	27300767	26042278	53406802	44983381	8395897
	24511539	42594578	35505040	53546642	26580006	6637210
	34166528	33253811	18999723	40480012	43378635	5544006
	22468412	33713846	13100199	27783468	46893698	9787485
	24408370	35802640	25966080	55858159	39794660	12001305
	30242640	22175898	21708785	55664054	19915970	7659169
	33805873	23972520	20368601		21506792	9846227
	24458744	17656034	26860528	29560049	23130103	4728090
	17273262	22757987	25417429	37795073	16548079	9344390
	55238162	32807562	43421237	19398924	21076261	6502514
	28629758	20764476	34820818	34393668	29941740	5504573
	46334620	13008783	26463996		47276910	9860649
	32696464	11745763	22751465	17602535	45462516	7745651
	25103751	20211338	24183647	40829297	24563750	8081047
	28319733	19712041	23179397	27654119	21732949	9166401
	17226250	27301574	44738158	25829883	42333533	9325407
	44054372	46479567	21740151	28844200	45618396	9734350
	26433934	16970222	31993298	17972663	52434280	11697034
	26288903	20371074	30441721	23741600	33244236	7092548
	22942324	17857055	33182734	44074209	53346144	12902834
	25794842	24137694	32642951	33725114	41881233	6529322
	49178353	23884759	20772272	24326695	39269894	6606581
	25711229	20850279	42530919	31285784	34728771	9809686
	24615179	28126955	26940709	34603166	48381253	6653594
	17187894	14550211	48456316	27669891	60110787	5729404
	25702837	18907968	30475986	28444508	64417729	5662595
	23375954	36455363	42740549	42969812	54191631	9671733
	23092181	33050802	30730389	21592627	42811528	6007627
	32058945	28942828	20470218	33020547	57949009	9232555
	19324253	21678967	20494518	42304599	42839113	7607668
	21652090	13023692	19732056	29386135	36074762	5878178
	28719292	10710068	34634118	36367108	19731232	7771322
	13094282	28694520	25779212	41888715	61297328	5697716
	15173559	33492944	30481621	24211829	18346237	8809594
	22671418	34795371	22140368	38368050	20542959	4821222
	34461817	20578127	36495322	34525007	23859003	2518980
	17999722	25277509	31485610	26074980	40519352	4235637
	21180398	41540267	49182070	34872675	44360576	5821103
	19863962	22865996	30613325	59985395	58624162	8449042
	34142045	30299436	41466062	40304945	22698086	10808144
	59956710	42256999	18633675	50963844	65605415	6871209
	57664583	16040285	40568619	38027354	27792268	10210606
	20097245	26179353	31687553	55766418	43865867	4630491
	25545525	38856593	19718390	26946667	28115918	4773952
	23713712	23050201	22661681	47365886	41522400	8074807
	30854988	27567396	22212572	47511566	38282667	5826994
	40222046	27432671	26281354	52401318	46126297	5824724
	18359244	31022025	49941926	27229758	27050866	10734773
	37670256	20117172	18181973	23696649	28493057	4656291
	32848829	14702045	25304422	38426070	35280782	5765177
	53705486	13464338	25776960	28465957	62876737	4854845
	21542582	25717409	42892771	37010759	64483401	4082233
	14397735	21961441	39264930	24543652	41306599	10705489
	15556891	19268278	42765912	22916057	43415905	5871766
	19144991	46763293	32372745	23105937	44703050	5063890
	28670036	36004340	29120632	36463408	31486165	3748661
	25156371	31046267	33853289	34466935	27629078	4781040
	28989542	31548564	44840887	28686600		2948028
	13636596	14447609	20195204	59694596		6748887
	26791556	20323336	36834090	62876196
	34412611	15965044	45584934	27283306
	32691927	16237026	22206500	35381108
	22199377	29403993	38467236	45819176
	29150946	24405018	27766953	41429726
	19679725	28715294	35088567	32732154
	20138949	20778374	58137133	31962814
	18608511	21399887	34876146	32119018
	19677532	23470022	47634370	43638173
	22504722	16743493	54514682	38190512
	24891205	22918082	50236154	33740870
	23564678	19726443	20971560	40572733
	22369593	16597999	31413543	35931051
	21228014	21298472	27600903	37851906
	17975802	20370042	32849488	32772503
	23886648	29173741	27016535	41415423
	23423630		25726485	38071661
	19382505			54021244
	28319926			36455720
	27495698			49984535
	18029328			38014627
				46236496
				49073310
				49013849
				29173777
				67295690
14.04.21	22098872	18399658	36194954	18623610	29216216	6460686			33910942	34753928	28919053	19544112		8977938	9191816	13770688	8065317	7041409
	22053261	15266591	49439200	20808319	14946408	4530643		33395520	35634945	35949157	31775800	19660101		7409385	7172817	9238392	12839796	11113762
	23147546	17082256	16902890	21863514	36048624	4764596		33921220	36375887	36076938	34209638	20396500		8716599	5588606	12051090	16704684	5729800
	16742000	23606317	23065388	16670441	22707636	6000677		35814078	37857697	37126567	35840007	20419937		5103021	7940960	15032120	15344403	6532097
	23349348	15913140	34740415	15320687	34986241	7138546		37966467	38481509	39668684	36970350	24447862		9112141	10640262	8552477	8796441	7434177
	28397139	25716816	36053950	30379098	36043631	5935437		38409759	38689823	40018469	37501127	25563874		5915148	9772531	7552717	12901398	6949414
	16580421	21084640	26791953	18136100	24304903	4235414		38509708	39374473	41101178	38367996	28183333		10082323	12470850	7878045	14923584	11817402
	18559865	17066468	20929853	25810568	24307374	5126931		38703501	40127213	42726184	38729671	30106832		9553521	10105024	7795236	10753932	4849861
	32227446	17375218	30461554	13341344	29603817	3939905		38922181	40142106	42741392	38764197	30290487		7816553	6162991	9027902	5955578	12955504
	25333125	15910380	25524260	25642773	23447578	4666750		38950793	40985122	44423516	39126411	31421783		13992877	5733181	13020001	6097817	18957825
	26658527	23366825	22190980	12782940	37347604	4359893		39138077	42160610	44475678	39550752	32067318		10811395	4840279	13087527	9843517	14216723
	19193303	21255480	33111154	18979167	23449915	4768693		39165375	42183818	44778742	40021122	34893735		11685520	9339327	9052404	8535895	18254885
	17138978	16396479	30305274	14859934	43047677	2083908		39513141	42397440	46017466	40193697	35124266		6089692	4536976	13118396	14383784	11851641
	29209998	20277505	42103339	19275217	41297490	2226369		39520675	42613499	46303339	40496672	35527038		9343063	9936210	13445274	9383054	11280892
	35385454	15878910	15832257	19257165	28544862	3221030		41834183	43537601	46583691	40513255	36183356		5582051	9015992		10367033	12604182
	28158240	23704240	33165394	16677930	8761247	5290945		41854737	43623161	46592563	40714359	37260894		5035837	6439091	7562679	12534637	7775810
	12141590	18197768	20951466	24951334	41960364	5405023		42077198	43832506	47956855	41617063	37282363			4972382	14120912	6615210	9376932
	25832681	19399146	37999126	16377420	14862220	8529895		42869669	44047415	48577122	42072214	37876652		14318535	6435312	8763955	11246938	10241069
	17022206	20533164	40072826	22206603	31574717	6737300		44625249	45002494	48616895	42095738	38839223		7997718	10662105	11163217	9550508	6939175
	47039458	21005668	29801859	13365171	24979080	8621437		45000384	45069912	48660055	42525245	39036294		6337571	12471219	7824238	8238724	10572465
	26217125	22115948	34763472	20632439	39646939	7436728		45192182	45251877	48884488	42660689	41200949		5598802	5690353	11596963	11808708	7941949
	31949316	29584072	28877480	28946671	24091328	5475903		45346093	45850637	49112323	42858977	41393958		6743000	5220114	9352511	6883961	12541512
	24462742	21010128	36404456	23416883	27173972	6405659		45425072	45926076	49258474	42890653	41553957		11570501	6031452	15099140	8865147	6611551
	16648248	19296047	26083011	23734069	15249082	5358636		45688110	46103980	49317569	43098971	41752033		11359507	6183745	12646647	6634350	10869030
	18885773	13216733	15133372	29870173	46324414	6719948		45771811	46285156	50318401	43172019	41955703		8667755	6522297	9860184	10128692	8538338
	16892869	22533451	28369051	20335846	26375528	7704141		46303184	47403250	50344694	43756402	42076197		13311052	9965648	8659574	6930817	7308884
	29224027	13759899	18767364	18201230	30511016	7616267		47303541	47776231	51271713	43873374	42899563		13677965	8889537	9455403	13779818	15575213
	25115059	18489012	23849171	34739746	37375606	9180749		48110552	50169438	51683818	44250068	43558022		8952263	6646575	18884955	8210882	9737362
	34566970	16312034	23469476	18737127	23528085	9830597		48894223	50565143	52356419	44875410	43728698		10408705	5500916	15365003	13904975	11808938
	20613521	11432493	26002904	29941052	22806511	4932603		49230045	50588389	52907815	45995917	43731677		12746455	10096587	10528200	7602066	5373826
	36495648	29781169	27975826	15016353	11052039	3103633		49420259	51394563	53030173	46118388	46923929		7817524	10494339	10397215	7149067	9688440
	32978704	22261183	17678556	20744369	39050631	3896380		49471626	52664251	53924070	46338954	47627647		11917110	10315848	8733512	8026127	6817409
	32513639	12115413	22713948	16249966	30780677	5345771		50196514	52830677	54298593	46399467	47729176		7233649	7604948	19113375	7673719	6825377
	20947276	18403701	27415346	19432774	33300637	4660988		51616301	53102011	54442602	46473302	47758650		10815898	5418733	14189954	9878968	6862363
	18016783	26028472	37709156	18068871	29352058	4089149		51865294	53510182	54632938	46837276	48108491		11452161	4766449	8922277	8467320	6497222
	30644744	37884010	38662015	20418578	46103754	4140542		51934863	54066900	55168112	46884411	48238323		15437258	7559574	10937605	7696881	6538198
	26328383	35430453	38093912	21976364	40308910	8678370		52882722	54107719	55306189	47375629	48533058		11475516	8814807	5960328	14723818	8226197
	26457993	37710406	20686568	21853396	23019510	3679627		53844232	54291186	56460964	47487364	48603849		7215259	7906741	6579563	10243235	16367186
	39689044	34755213	26037239	19045809	21150766	7332135		53980791	54304379	56475560	47616788	48710331		7567723	9192435	8289263	9195204	9172664
	23468436	35749069	26135535	13187664	19048287	5587438		54429042	54426976	56494884	47746995	48728416		6729737	4975370	7288703	8767093	7775929
	11492258	37772964	25012025	14078651	30470397	6557781		54791042	54597904	56965680	48171253	48754444		9794064	4161075	13730865	8521519	7977447
	21582376	17927062	56546078	16960905	32839461	6417165		54990029	55041800	56980143	48441217	49785414		14599233	3949382	5412316	11390975	20719946
	10989312	30302952	20586444	13103841	20003983	7307214		55141263	55247839	57925782	48687554	50160408		7898358	7632777	10355978	5037618	8226905
	11341298	25787290	35960619	14267467	25850027	7206422		55833747	55507295	58503646	48705201	50591969		11170486	8836922	15046265	9738936	9370692
	15123600	23671876	22321120	22395614	16634412	6877306		56973321	55729099	58854475	48732872	50951720		6296483	8343478	8771350	10332673	9392446
	27486507	17137894	35739881	19452105	16857810	4861166		57300365	56211792	59462269	49088094	52580505		5865014	8042892	15201584	12927470	6144346
	12870478	18219219	27631467	16000415	24810960	7127720		57340442	57117774	60476633	49132949	53787456		6023794	9891330	6998945	11650151	10436591
	18303210	26985304	27991891	14002854	47046658	8599885		57357994	59245543	60486975	50091253	53788120		12356394	7388474	15260934	10123321	8393938
	17944626	19061538	24505316	21558959	27060860	8994395		57675218	59250323	61008096	50499569	55281565		5821811	11150091	11732417	6525231	8520869
	21831874	45059421	18391861	16618957	25392580	23832895		57859455	62028617	61089657	50586951	55923351		10233379	5196232	7909958	11070454	6544417
	12839894	27973923	36319694	20981935	33791018	12889236		58674512	62455072	61435595	50841633	56147828		5737175	7102470	10546298	6940384	7277244
	18718874	29614966	24676203	32135676	37139372	9400909		59317114	64599405	61513154	51248599	56416985		6248697	6627047	9039085	7311160	9189157
	33116261	19502034	18080289	35128952	31654552	4542105		59470414	65854974	62355812	52409144	56516447		5788313	7044365	9373574	7063523	6015522
	30651489	15674668	25458324	16238434	15335025	6276941		59562461	66287128	62369606	53825145	56609023		7108268	10089667	6773383	7371529	5929910
	21987251	25155257	36873506	19753596	43100695	12437989		60367444	66429727	62950168	54563594	58283743		12519774	13165522	8578029	8679486	8889627
	21812222	22040554	40682766	27746317	28633539	10802345		61081244	66564691	63108106	54721829	58369295		8898834	7322923	6863466	5004741	9656821
	23440396	24126373	19265359	17130266	11902182	7549181		61370163	66691562	64162952	55337914	58719399		10480260	14250412	9619663	8366409	9976672
	36907201	13504887	34789232	19494915	22403968	7624732		62783319	69022700	64408294	55364865	59731722		9936458	7805522	6700371	10495605	7842215
	19476719	26762882	38623067	18530408	28367395	6149262		62883884	69352260	64781326	55693457	60141877		12270361	6963584	7122765	7063745	10311854
	21368611	23732011	36832368	15066695	29621483	8881177		63439538	69534222	65732090	55822527	62379093		11925862	6772285	7644154	14194919	8908933
	39227708	17047348	26578794	16951002	44604937	6895496		63497408	69550554	67511024	57495892	62956277		9692176	10405826	10229070	6567466	8328183
	22351778	21136104	35494064	18311568	29437120	4880690		65341275	70214360	67758375	57825895	66181187		10940216	7125684	11895109	6543299	12615330
	17386552	19015710	47065986	18242530	24700599	9476989		65697916	70505525	68152519	59843290	66196069		7064524	6774879	8572850	7176544	10172780
	23172737	22416999	30859280	11340863	25546219	7934806		69271086	72036722	69092439	60196418	66224929		10201392	7620270	7189274	5288328	12644003
	20757045	21954446	39361992	13276687	35624995	5429257		69458793	72661112	69128238	61042978	66616199		8496389	9000404	7959255	11531476	15756972
	22056040	15760381	30644012	21292329	31199715	7185882		69596934	72939375	69851213	62375493	71760920		9407932	10027792	9445972	9889526	7320249
	26091696	10389616	48111739	18099053	34904934	7613763		69663515	72993510	70325632	62838198	74263239		6420527	7182960	9122587	7784870	11078480
	14107738	32732148	35924153	20943375	32415881	6631051		70970665	74095648	70997889	63308599	74852882		16102346	18906465	8147535	7231776	7860044
	12806669	16720525	17184719	20422326	29681374	6143494		71483090	75633382	71025915	64596791	76211358		12779671	12076678	7966911	8136099	12722694
	10325878	14282248	37779464	10996484	33738155	7392871		72175439	79228523	71471275	64964948	77234548		11952860	14105576	8563596	10982052	11138073
	8445317	10888228	49070987	11828703	27230414	6789024		73483959	80087708	72987626	65345429	86849114		12638080	9069003	8113268	5586461	11859152
	12481049	20372836	63027173	13410774	41560527	7392117		75183669	80994281	73843407	66683880	90942164		6402324	6283008	8662738	6975718	9121211
	10665104	12948591	43223950	14464935	29876403	7148404		77247003	82323959	74524955	66940292	97217820		8945226	13636472	17121515	7022979	12904074
	9684292	18459269	49586072	14545699	30185119	4611160		77807873	83503215	75233767	67994769	111271312		11700068	8945149	7809921	7535007	10687585
	15826463	11893200	27951197	14550055	22949887	6357512		78317616	83899226	75360333	68909995			9013699	6866737	15258975	7444930
	9285467	14867939	46172519	29654144	33235470	8576182		81643616	84184651	76093224	69632768			9441930	8658676	8641426	11209145
	15080903	16402361	24496720	18601764	27945625	3631052		82115075	84512381	76113946	70193492			12382641	6837471	9252042	11222843
	13107702	26507130	44990171	24488091	38829256	4361322		85188534	85162049	77272220	70276420			10568490	13438966	7246043	11560073
	11703889	20568611	30488253	23809585	35589926	6194238		86336725	85802283	77736267	70512276			8512120	11468444	7334715	7690986
	15079758	15345098	34610596	12922858	25863500	4292852		88333917	87210652	78513010	72040936			11972763	15312299	8533766	10704515
	10982675	18708886	36969460	16426220	39510338	6087504		88492600	87857558	79659608	72194476			13709815	7554410	15683246	6675319
	8561603	20186967	39445980	20482095	23841992	5138128		90007402	93240655	82265371	75186085			14495289	7701219	11703784	6904722
	8616171	22797307	52778053	11182701	23309944	4802369				84372487	75693939			16716517	11718365	10139309	6411025
	9616946	17670873	48588921	20774614	41460345	5995085				84570531	76641643				8506079	9969099	11389608
	16249116	23267738	39362795	13906729	23134501	4935613				85326992	76904930					8389827	9211799
	10019261	14212808	41674824	18323742	33146705	6623045				86980524	77323206					13757760	7696950
	14237256	22400892	24043332	13316212	31469720	7453231				87129548	79595069					10350299	6131720
	6066588	31201464	16723767	13755821	32178324	4523856				87466370	79673740					7844817	11988231
	15168530	19435149	25839869	12003919	27637110	6595077				88085168	82406884					8817362	5748805
	12676174	12868564	35092906	11575410	23779448	6478073				89048369						6473379
	15198657			17279811	23457964	3869418				93706050						17452127
	10668235					6018564				96277904						8009427
	9694809					6312574				103468542						8500014
	8235860					3677312				108663592						7739818
	20180828					7361758
	5820391					4098949
	9051580					3657646
	9740316					6410533
	15402996					3131083
	11727351					4029273
	7892154
04.05.21	26084980	8766047	31949205	49316436	52342920			20843571	21836072	19052211	16187118	15765543		5429334	5401957	6936213	4699647	8078178
	29189387	11538473	37963383	44416562	33151230			20993122	21944858	19616823	16884676	16988087		5064485	9121345	4558780	7116163	6487293
	24364627	16698320	55106949	47388521	51713869			23461951	24176654	22692529	17316853	17744838		7330521	6506018	6040246	7327585	10646640
	15019468	20453130	35895071	39575049	31300171			23523534	25261661	22779296	18829392	19225002		6387834	13862293	4278055	8020281	7513318
	11543175	23781251	31698506	39904717	30983195			25652232	26383903	23305144	20327354	20238585		12407427	4652199	4743602	5599226	9721989
	19225387	18504897	36937888	28696226	41670351			26463597	26937626	23681265	22009442	20426562		5169080	7770245	4650416	6973218	8621273
	27142266	12592205	32286924	44080744	25997638			27501331	27789764	24102994	22793585	21527071		7664647	5904377	5333020	11820017	6711116
	21747466	20730457	32384466	38344861	32883882			27545842	28191659	24474566	22952373	22720996		7421705	9445545	8696209	9116175	11687082
	22665666	17858549	47704368	35975158	33923331			27717885	29837936	24533241	23236360	23431333		9988423	8915865	7497605	8809187	9125651
	22388677	15645115	45923648	30628181	77145216			27871760	29888134	24723806	24192360	23516153		10445282	9480243	10171016	13222033	13243736
	22246765	13271312	48694517	37769336	66831162			28335228	30516932	24845497	24205115	24464472		8205572	9260730	16626344	7620832	9784346
	20243028	8958680	45305821	62930670	44209397			29573359	30763800	27171210	24846571	25114411		12527951	10522939	11613636	9457636	10342686
	26751429	16085832	53106267	37706298	35643982			29963314	31179425	27719932	25239205	25444123		12752358	13844575	8567052	7310339	9944030
	36077207	14525160	44347124	29549593	33163512			30029768	31417421	28081618	25541089	25584240		12368228	10359840	10053255	10826560	10673545
	32277443	17761550	59849388	23114885	41930251			30171205	31683927	28107034	26937229	25985838		11575356	6785911	8332535		10574424
	40644451	13499589	48108506	68001582	32935128			30171271	32868227	28215385	27118622	26372928		8705198	7832661	9572564	7826387	14122147
	39266774	16184303	49540685	51624657	48938910			30262273	33612155	28334666	27836428	27256489		6030739	5166334	16649926	5530756	5711412
	6243820	11492946	57446625	34493069	25280270			30722401	33616637	28454654	28475130	27406493		7345845	9127034	5788683	6120590	4079531
	23779085	25111305	45055204	42085432	55398703			30885199	33961227	28701628	28807353	27642453		8026975	5410934	4666797	5500083	6681979
	46788600	23578585	41267832	33442334	39418066			31017355	34348086	28840320	29097398	27949108		6639414	8771373	6959013	9333049
	25483347	24906330	41592711	41589211	44757757			31498295	34695916	28842286	29422645	28197261		7984142	7911424	11807930	5078302	9056722
	23284381	18746869	37116047	30674077	53547061			31506854	35771478	30436714	29484958	28686203		7138862	5774330	14647963	7090315	9789073
	24266508	24740529	42302746	48788042	48360472			32187703	36375860	30455732	29512647	31851235		11420409	7054824	7044003	5261838	12399486
	25327127	29710343	41430758	38299116	50993535			32573764	36739620	31514545	30765836	32646557		10864798	7158186	8679993	9248555	10284111
	5436548	37664334	51051297	27784370	61759466			32916601	37090932	32182842	30858536	33201926		18275576	15128370	5004680	8488783	9479182
	11313257	26916865	34245387	36910920	47577671			33402236	37163792	32516451	31403958	33264196		12986475	6692626	7361552	5475593	7458237
	19792999	16839403	43864485	28296108	60807972			33414299	37584307	32576349	31470683	33555301		11603462	7401970	4354409	11361672	7188968
	38970587	19098239	45371515	61916512	39238101			34337210	37907561	32650473	31763707	33720155		10868995	11812661	5431870	13041599	7083164
	28599200	15803295	42497228	41878989	44135375			34381803	38147659	34124874	32332177	33935639		10239063	9551971	14458046	10087422	3471506
	17486253	27479155		33884900	41557772			34575439	38562508	34160592	32344470	34563722		7286324	11756796	8236437	12012485	9472876
	33080844	36299710	26001086	47659159	48482722			34738699	39426538	34249626	32359779	34776078		9346383	15232034	14569688	7958462	10436534
	21575791	34315162	34553920	54819777	50473165			34981244	39514959	34437704	32785700	35063116		12495029	9509049	10533197	10601852	6261309
	24425981	57445051	21473996	15610138	48307021			36388272	40105813	34591049	33618269	35404899		11482581	16228259	6456974	9592993	14866348
	51762850	46035605	43932587	17410955	54713108			36592145	40749289	34694807	33787970	35626295		14397644	9216288	5131252	11109388	9403941
	13760718	42709193	23785049	19671472	47251150			37468296	41716679	35330878	34156500	36214401			6904873	13700928	7623152	13190674
	8717273	58428274	36427489	28011564	38536996			37728651	42037219	35558127	34175866	36649977		7095502	7030769	9277272	8776269	12595790
	20963114	21651674	29579032	51793999	38436869			37886496	42715188	35584357	34181497	36986990		4829176	4083430	6620823	7738133	5957661
	20454123		44893881	38241093	32637236			38361716	43662846	35927450	34367373	37045144		4352457	8790070	6929064	7542856	16677796
	16619443	17178876	45209839	38216416	52754351			38834870	43743487	36674922	35115351	37534172		3996223	6636655	16083442	10426732	9774795
	16335115	14513272	51144758	39797332	68159596			39661832	44021901	36744302	35347325	37659490		6294546	7408744	15648380	9814432	11281668
	16559892	14126446	76476438	33950033	48695595			39762371	44231605	37419484	35451441	38942123		4120735	10716088	8407567	5286925	9450714
	27783425	39516506	33740830	37355943	70056603			40189633	44271360	37651393	35632686	41390047		4817550	6514800	14174379	5804509	6364195
	30889362	41574478	22187186	38935498	57146923			40401665	44300778	37748229	35885229	41434387		6326659	10912391	7644914		6248866
	29802734	38262132	22739121	28937626	27996424			40493729	45274713	37955916	36103749	41959739		7049330	7099644	7828292	3508561	12014484
	30052560	38467675	39331337	28637777	26812853			41585909	45284117	38076454	36375648	41972484		5889142	7356412	8152972	3815301	15507132
	29717903	32723089	20328138	49806693	41050926			42156044	45414741	38151977	36440888	42118399		5421217	12579520	10914424	6848255	11750506
	21369580	45656186	21253142	32322285	37474446			43955996	46246392	38819338	36512893	42285616		6932434	15966528	8892694	9955627	5726671
	18300179	45641309	43981924	27394286	39990660			44002541	46597267	39014062	36753449	42462607		10877223	11638205	8371314	8969367	4864317
	16961758	42002120	39728271	37657682	29827839			44407088	47423862	39337991	37313014	42883290		6418089	10071737	5828734	5167989	3541725
	41824825	26342093	18984336	29932770	60916630			44432989	47509421	39800452	37663592	43934068		8023681	7993543	9497013	5413917	9776411
		31217570	32068383	34723295	25493966			44770579	48141952	39895506	38128879	44957141		7285005	11788585	6269267	3869906	8023103
		26342093	25944581	39597808	21243050			44814229	48553146	40582720	38605423	45168974		7540514	9495466	6054821	3159975	6638508
		47353974	23017510	36531557	34152809			44960352	49614544	40876154	38616853	45629817		8301366	9821787	18150631		7842238
		39007490	50068739	34365478	23052294			45072115	49667940	41149157	38920155	47005999		14085478	7411095	8970188	6178734	10461911
		49155829	41013361	46810190	25475934			45145235	50036546	41901588	39266701	48004319		11973945	8606504	8582169	6176532	12105863
		38673942	40011056	35457233	22865432			45324165	50287115	42150854	39622017	48134167		13251739	5697186	11302545	5286890	8980809
		19028326	36553000	36615463	21299375			46210197	50655056	42522645	39690575	49600303			9854317	6299216	6109116	9034524
		12506342	66323224	35029694	22928989			46431105	51106217	42610726	40877481	53307665		7519516	6291621	11376948	13899059	12306894
		26060253	48646624	42028544	23905088			49050966	51247034	42718799	41564794	53440017		8260524	7061574	9038939	4617486	10421503
		38465677	32241476	44280497	26350727			49468401	51961740	43176825	41624683	56021687		12330745	10101078	6869243	13336273	5588388
		35301714	42569596	31194379	20574801			49955320	51976205	43184787	41927517	56521192		6283393	8464362	5741045	8672952	6189070
		45182983	32519612	52179190	37308727			50373804	53557197	43215298	41940520	62346737		7827172	7101016	8996057	8296597	4485353
		42979232	27497494	32748472	21639895			50535901	55417228	43844240	42053096	66160617		7420143	6126039	6782344	11391953	5724075
		43963632	38421840	41477814	23185416			51449297	56930646	44117678	42403928	66389975		5293956	7682871	5965555	7896028	4938297
		54855049	36580456	45598425				52299440	57094535	44118174	43394747			4511310	12043851	6952415	4955830
		38708630	40224049	32033167				52302348	59339703	44474465	43878426			6065933	8786802	5026376	4684875
		31558186	38522540	46610595				53023300	59777102	45227383	43981622			4337178	15889596	3067292	9333013
		39619745	23890249	22839030				53286590	61475041	45458328	45548703			6471617	17549878	9099969	13877012
		33163306	26105255	33791048				53570028	63161268	46494876	45676120			8687104	9092548	16521248	9183620
		21645499	35589550	40861110				54347301	67617523	46904878	45679522			9890622	15443731	4734814	18722399
		22016991	34298472					55216152	70002918	47892191	46179689			10854402	15027176	4049903	12459564
		46159901	39782805					55318523	70223681	48892471	46420320			9689604	11853602	10215879	10173150
		45371058	37751992					55613896	73797377	49404886	46659306			11319789	16203186	5973246	6961890
		32845456	48276447					57004367	73824288	49498163	46786073			13441745	12198488	6739906	8991207
		24183372	26063732					57192879	75680048	49596158	47432754			8985570	7628584	8704750	13630966
		31715902	22862793					57431821	77300561	50498154	48779676			10646194	13304350	11841987	11709207
		19311672	25128751					58115489	78071828	51258682	50334290			12012543	10361681	14201996	9059035
			62456976					58135627	81019758	51364546	50499270			12185459	15126608	8417098	4849389
			57510645					59320678	82384131	51366113	50593216			11007303	13569424	13836818	7713665
			35936526					60984932		52498105	50598040			11143756		6525615	6695727
			26582028					61464023		55917982	50952986			8369878		11519110	7162208
			61141856					61768258		55991622	51773119			17357215		8575058	7185775
			31309030					61770345		57345382	52944768			11191172		9547948	5190196
			40738818					61787270		57514505	53077983			11086968		6329635	6589339
			42337084					62519968		58027800	54350650			6559059		7865876	12196194
			44448700							59117430	55744675			6346162		8039045	13474188
			72441519							62697287	56050142			7701423		8676342	17240460
			39843485							63280649	56434984					7915816	10408719
			34042119							63770660	56546285					9758223	10732840
			57622235							63833268	58372984					11619343	4386886
			50051041							63907307	60009511					8328562	7982549
			42125092							64809711	60029146					8158060	7816224
			45087982							65722562	61072242					10495260	5000307
			45562202							66877446	62528018					8933589	6527452
			64663776							70278100	67479086					7610446	6720078
			60679807							70524842	67540981					10107873	8000138
			58975173							72845708	68744615					8776425	6511552
			31287415							76622970	101579428					10634845	6834121
			42705829							78565318						10036880	5292602
			53493313							82666202						12760187
Moyenne	2.38379e+07	2.49421e+07	3.49243e+07	3.12144e+07	3.56303e+07	6.90279e+06		4.8953e+07	5.22516e+07	5.20376e+07	4.60238e+07	4.36674e+07		9.29739e+06	9.03093e+06	9.50217e+06	8.71449e+06	9.41148e+06
SD	9.98436e+06	9.87451e+06	1.14224e+07	1.28237e+07	1.31888e+07	2.63794e+06		1.4988e+07	1.64561e+07	1.80684e+07	1.47684e+07	1.68271e+07		2.98748e+06	3.05811e+06	3.23889e+06	2.87826e+06	3.13134e+06
SEM	636580	617157	682618	796826	875371	201141		1.1633e+06	1.29693e+06	1.29724e+06	1.07997e+06	1.43241e+06		231178	239530	233140	211614	267528
Par rapport à NoUV
Moyenne	100	104.632	146.508	130.944	149.469	28.9572		100	106.738	106.301	94.0165	89.2027		100	97.134	102.202	93.7305	101.227
SD	41.8844	41.4235	47.9169	53.7954	55.327	11.0661		30.6172	33.6162	36.9098	30.1686	34.3739		32.1325	32.8921	34.8365	30.9577	33.6797
SEM	2.67045	2.58897	2.86358	3.34268	3.67218	0.843785		2.37636	2.64933	2.64997	2.20615	2.9261		2.48649	2.57631	2.50759	2.27605	2.87745
variance	9.92823e+13	97124985407213	1.30005e+14	1.63812e+14	1.73178e+14	6.91824e+12		2.23288e+14	269122635901012	3.24786e+14	2.1694e+14	2.81098e+14		8.87161e+12	9.29465e+12	1.0436e+13	8.23958e+12	9.7337e+12
t.test		0.213588	5.59408e-29	1.86092e-12	1.63871e-24	8.01414e-76			0.0592133	0.0775269	0.0658485	0.00449777			0.424033	0.533229	0.0637554	0.74718
			***	***	***	***						**
