# Supplementary material for: XAB2 dynamics during DNA damage-dependent transcription inhibition
Source: eLife. 2022 Jul 26;11:e77094. doi: 10.7554/eLife.77094 (PMC9436415; doi:10.7554/eLife.77094)
Supplement: Figure 6—source data 1. [file elife-77094-fig6-data1.xlsx]

## Sheet: 1-23.04.2021
	PLA							IF XAB2						IF CSA
Rawintden	NoUV	1h	2h	4h	16h	control		NoUV	1h	2h	4h	16h		NoUV	1h	2h	4h	16h
	8575474	3591986	1562952	1796987		2340034		18616965	25831941		22180549	17219006		3700759	4005220	2611752	3398531	3469532
	8893434	4311535	4074497	1849288	7801359	3095625		19094286	28954792	18956398	23093943	18437718		3835373	4426628	4216280	3915833	4106217
	9460374	6090294	7206372	1931822	8779827	4542409		19382650	30048745	19702607	24596514	19380327		3878730	4647807	4332495	4065417	4724528
	10592213	6218357	7288559	2103483	10107313	4733324		20355181	30127224	20919559	25088312	19764941		3911733	4680582	4932193	4071375	4842316
	10682704	6580278	7929801	2123353	10119852	7224479		22016387	30478471	21339127	25397702	20231126		3956601	4938648	4935078	4475171	4940507
	10873891	7487334	8039985	2125100	10184548	7789795		25679016	30643321	21808744	26092758	20812381		4359557	4972955	5007578	4479374	5184057
	12818201	7796894	8343984	2139427	10274495	7941928		27578239	30787739	22111147	26194718	22195426		4381958	5045135	5153022	4756101	5245766
	12927960	7995033	8720408	2163658	10361509	8296108		28957325	31218834	22969962	26257495	22279111		4407330	5101203	5284107	4867302	5268448
	12955128	8548929	8792788	2203976	10773610	8362072		29627837	31296623	23090703	26977857	22670242		4450806	5175110	5332835	5559430	5279250
	13143859	9038985	8853219	2269022	11002984	8753697		29925502	31318005	23336459	27065769	23185928		4612590	5233129	5587021	5597266	5371331
	13170746	9109294	8919671	2435224	11421404	9002933		30998609	31422596	24145976	27231879	24015729		4739092	5309960	5695549	5691784	5413881
	13432643	9123422	9078667	2458392	11930259	9064003		31345571	31612210	24644992	27578626	24698126		4783643	5540798	5980460	5697220	5430646
	13496123	9199569	9509335	2466681	12100124	9320440		31935605	31871343	24919353	27928920	26264606		4868889	5611377	6039383	5837911	5593502
	13821612	9296802	9644823	2479746	12473209	9372184		32432911	32109721	25675857	28282955	26500762		5045664	5647638	6067329	6008292	5839476
	13854673	10019292	9726874	2492099	13337919	9887412		32736510	32129447	25711690	28606983	26604359		5063264	5673475	6077694	6116658	6062679
	14421660	10268592	9908270	2548928	13412626	9898822		33011156	32179303	25794851	29773752	27402650		5066030	5721069	6163339	6164525	6098062
	14439473	10456994	9985482	2571180	13455224	9968015		33210453	32284416	25825252	30112817	27632682		5331162	5781773	6177664	6174084	6098347
	14536727	10582933	10550130	2649841	13578063	10109751		34742315	32723739	26048911	30325675	27685055		5426832	5795730	6232758	6206478	6100391
	14634897	11101283	10643736	2652072	13809104	10395044		34745427	33124512	26097870	30356043	28003793		5467258	5803240	6337735	6226042	6117580
	14650150	11109770	10696235	2683058	14210187	10554916		34752578	33136531	26426902	30524845	28083592		5589226	5827072	6461121	6336340	6307684
	14754259	11188746	10779688	2687810	14622094	10731373		35019270	33209594	27118902	30611944	28139957		5600354	5870733	6474952	6409211	6737301
	14843742	11255772	10941833	2700380	14706215	10844725		35161952	33427030	27229702	31242873	28354622		5724256	5937457	6573071	6466630	6829906
	14951481	11261006	10953958	2701689	14761331	11316989		36132329	34201364	27424149	31363161	30180895		5847593	5951806	6681086	6575739	6832019
	15182456	11383325	11170767	2704467	15053754	11346424		36250215	34211091	28926161	31976204	30219258		5927495	6054383	6773963	6718948	6854157
	15650725	11640428	11518917	2783515	15178738	11638034		36633729	34343668	29308630	32100946	30399959		5940580	6101680	6849389	6923361	6896457
	15889021	12004355	11961536	2791432	15291062	12391889		36737559	34678166	29516497	32511601	30957813		6115571	6107267	6890404	7149040	6910204
	16227136	12039823	12395251	2814112	15303518	12408614		36766951	35270986	29706187	32726512	31137038		6204183	6118303	6895381	7344712	6937251
	16241804	12128685	12439204	2834842	15565260	12511493		37351566	35312517	29763519	32767063	31252573		6215337	6226322	6901274	7425248	7084513
	16343703	12217334	12490187	2838250	16208018	12557535		37958373	35420432	29801061	32827041	31333969		6639441	6288071	6974179	7535203	7403455
	16345132	12470748	12514260	2860672	16385369	12592308		38367885	35547398	30873955	33217036	31366463		6658937	6333830	7008139	7592619	7488429
	16746559	12546840	12523105	2903765	16519986	12709814		39352147	35695307	30883631	33854406	31633488		6666740	6367101	7152888	7669596	7576894
	16871012	13931005	12744713	2909424	16649313	12899004		39983654	36162707	31029331	34732409	31687892		6783511	6391507	7364942	7818300	7578806
	16954372	13965184	12826922	2982286	17084295	12972870		40418064	36652985	31388995	34763672	31947443		6809569	6400822	7375245	7903243	7597487
	17038208	14558053	12877955	2984247	17505708	13002897		40730162	37106122	31983772	34988408	32069511		6895253	6421482	7385873	8082278	7618853
	17048098	14681763	12936434	3043630	17810740	13037593		40797054	37290211	32172715	35083759	32157551		7155371	6454182	7389710	8257792	7759145
	17174066	14719149	12990769	3087378	18309419	13190162		40940321	37298259	32332256	35448344	32818276		7349146	6468313	7393283	8338325	7851825
	17420546	14768888	13014605	3089968	18553030	13191550		41100000	37488200	32655009	35771701	32945893		7645667	6526007	7416663	8375524	7982561
	17721871	14968238	13100379	3090190	18742667	13282764		43026858	37500702	32740713	36746336	33043029		7691550	6649972	7620423	8556334	8030176
	17777484	15120066	13160080	3141658	18977546	13303182		43400144	38666074	33507760	37145456	34190499		7735248	6681852	7638416	8963701	8243317
	17784776	15216564	13307610	3194023	19204684	13469849		44638770	38882278	33809535	38087368	35182001		8137900	6682708	7759623	8991567	8407108
	17861300	15226588	13429449	3331500	20074865	13630136		44652500	38908139	33962175	38194034	35316145		8200103	6698149	7809393	9109290	8472290
	18029373	15227102	13453782	3353771	20652824	13675772		44905097	39009299	33962790	38550144	35341119		8373353	6769790	7810443	9609038	8474804
	18060527	15275490	13502807	3358035	21123120	13776097		45712569	39115042	34002745	40927428	35846488		8455550	6842683	7848599	9684825	8490670
	18095659	15348293	13564193	3498909	21313124	13876657		46142326	39620636	34552457	41210585	36047217		8681246	6886910	7914485	9728886	8539540
	18276030	15677981	13599321	3541871	21668642	13902634		46459706	39636321	34607148	41715570	36208422		8917690	7063413	8101947	9751749	8545890
	18331433	15706204	13606730	3555053	21783676	14171038		46553706	39638772	35279506	42686302	36543903		9210773	7074571	8548763	9857198	8587978
	18416397	15767707	14003029	3588196	21885993	14256320		46659489	39668647	35328044	42984559	36948476		9285218	7076616	9193846	10093642	8720040
	18640177	15854352	14305667	3655785	23051585	14411206		46944544	39704758	35487432	43083777	36959489		9394874	7110880	9320544	10278547	8856682
	18857586	15957031	14566061	3751468	23686150	14428506		47944750	39792418	35748330	43105855	37414276		9446001	7160131	9614039	10401202	9141779
	18858283	15959396	14582941	3754359	24161259	14666688		49210745	39965864	36219131	43230016	37544603		9647711	7200689	9678151	10430641	9564582
	19227503	16038409	14761324	3795661	24473505	14725767		50712183	40000416	36389098	43510605	37573066		9671647	7280731	9739979	10689983	10186385
	19316445	16277411	14793294	3803445	25093602	15123557		52320336	40039074	36567898	44569704	37736331		9851917	7373336	9743886	10740827	10443007
	19436523	16441290	14933394	3813109	25395068	15135376		53954034	40187043	36647212	44689929	40346914		9870024	7471695	10121082	10746763	10849633
	19901644	16574788	15067610	3835597	26108799	15267705		54015427	40611933	37042154	44754267	41779891		9918890	7501719	10224094	11223500	10950621
	19903708	16604552	15126838	3865116	26917132	15312828		54487360	40832372	37288643	44790248	42087619		10241909	7555520	10257325	11331883	11171792
	20553130	16615019	15134786	3878506	26999031	15354247		54540659	41318197	37846759	44817599	42629395		10467697	7880872	10411940	11706988	11383166
	20760191	16659591	15295550	3909752	28296847	15406696		55131333	41371819	38124738	44898171	42750008		10516434	7937156	10728340	11997975	11389669
	20988043	16683736	15324028	3920222	30792086	15650052		55428379	41455266	38950770	46136542	43351832		10618208	8029990	10906223	12258611	11627257
	21099911	16727724	15365184	3933176		15725848		56087523	41579304	39016870	46401904	43522148		10670476	8134474	10959189	12312768	11728509
	21323781	16850957	15388642	3941497		15739370		56240486	41656684	39082926	46451047	44304155		10963495	8216109	11021531	12745912	11882739
	21363819	16930374	15494409	4065415		15856679		57036426	41661757	39333770	46455613	45712985		10991596	8270491	11227008	13002199	12370494
	21370612	16930459	15523655	4112922		16133866		57318553	41882219	39395020	48445496	46455037		12091749	8363244	11289612	13368846	12821680
	21564298	17403348	15524456	4158632		16367025		57514776	42082613	40160288	48473464	46740371		12187729	8409310	11302180	13607975	13101001
	22532241	17543669	16589591	4167732		16723867		58371042	42160492	40538255	48830545	47395747		12459052	8497674	11423425	14352875	13116023
	22565358	17633809	16672727	4332295		16727304		58788518	43271685	41255619	50343830	51614441		12775023	8530401	11439321	14597154	13474103
	22919658	17862904	16686945	4399735		16861350		59081981	43682532	41362810	50784755	51635626		12857411	8550519	11459547	14877750	14160544
	22959949	17872538	17373579	4462043		17047866		59967442	44265100	41405516	51477548	52466467		13118266	9076146	11950270	14977127	14214274
	23322404	18022998	17678936	4489428		17739528		60086946	44524463	41967664	51858964			13147188	9084372	12191727	15360171	14984388
	23362967	18105910	17960261	4551755		17854242		60365567	45058153	42508821	53722487			13291729	9176533	12194143	15366991	15336241
	23535201	18267486	18506129	4728237		17971335		61520197	45451565	42677542	53831918			13446041	9200075	12238096	15435905	15835846
	23868446	19040208	18695815	4813495		18003807		62722802	45509605	42709936	54645942			14242096	9245379	12879476	15550419	17137065
	24248294	19044453	18716004	4864529		18938613		64112202	45604705	43308492	54671270			14478387	9246140	12887454	16026283
	24783090	19254020	18770440	4911232		19076882		65533325	45976664	43633612	55372225			15226653	9376770	13198125	16050427
	25740764	19269485	18942206	4998460		19264707		65579036	47257819	44759350	55831956			15366683	9409700	13303752	16070439
	25918539	19352616	19436211	5003370		19282414		66848912	47421863	45333670	56126264			15620127	9519644	13426100	16237786
	26148026	19636846	19644794	5008045		19307552		70316609	47527679	45827554	56557473				9618835	13450904	16324247
	26181474	19815808	19705357	5162571		19327988		73605563	48012619	46893525	58580644				9788990	13685258	16361603
	26407853	19850008	19819185	5200999		19535370		74817260	48341569	48208248	58837010				10154483	14321797	16377250
	28034126	19863704	20475979	5336239		19817948		75323369	48681330	48751764	58867827				10358780	14366861	16466578
	28238133	19999334	20808711	5361802		20114759			48900486	48790198	59231575				10461280	14487508	16635556
	29923250	20015029	20889999	5362073		20169087			49583309	49855761	59253975				10612527	15455034	16670770
	31544523	20329550	21196246	5504303		20171849			49826718	50684321	59296954				10832405	16615119	17036742
	31814639	20644655	21225092	5596500		20231754			51408404	51147068	59770581				10966713	16990947	17413552
	31981278	21139563	21347730	5614329		21173877			53177793	52180751	60012804				11176080	17186414	17767695
		21930131	21472468	5691684		21208002			54442533	54441101	60906641				11245864	17330570	17873113
		22447506	22416978	5721152		21208947			54983095	54494381	63930306				11352840	17450852	18021332
		23139831	22596120	5815795		21407251			55077446	54861578	64188812				11618085	17873783	18379430
		23374939	22697243	5826880		21479318			55539912	56901780	66159390				11931050	17892196	18471812
		24060061	22734683	5852678		21525874			55718759	57202215	68323088				12158985	19193500	18493492
		25557478	23310480	5892619		21685938			56987140	57635825	68548678				12584909	19363165	19868162
			27554848	6139645		22035528			57566936	58252366	70416115				12691447	20320104	20505110
			27909861	6692848		22221607			57585414	59942300	70789129				12711436	20336328	20541063
				6883938		23095701			58932535	61883233					12848760	20784036
				6900405		23826985			59653609						13209894
				7110270		24750409			62691770						13442306
									62996842						14241369
									63403619						14822308
									63463110						14978893
									65363569						15253554
									65792438						16121952
									67806459						17366197
Moyenne	1.87692e+07	1.49534e+07	1.4612e+07	3.82217e+06	1.72815e+07	1.46572e+07		4.51763e+07	4.23273e+07	3.66968e+07	4.27488e+07	3.32292e+07		8.27098e+06	8.26479e+06	1.00066e+07	1.08862e+07	8.61511e+06
SD	5.28319e+06	4.66606e+06	4.88539e+06	1.3166e+06	5.54605e+06	4.7936e+06		1.38931e+07	9.83172e+06	1.04673e+07	1.29119e+07	8.52875e+06		3.29208e+06	2.90835e+06	4.3026e+06	4.69621e+06	3.14058e+06
SEM	576443	491846	509338	135081	734593	491813		1.56309e+06	978293	1.0913e+06	1.34616e+06	1.04195e+06		380137	289392	446158	489613	372718
Par rapport à NoUV
Moyenne	100	79.6698	77.8509	20.364	92.0734	78.0916		100	93.6936	81.2304	94.6266	73.5546		100	99.9253	120.984	131.62	104.161
SD	28.1482	24.8601	26.0287	7.01469	29.5487	25.5397		30.7531	21.763	23.17	28.5811	18.8788		39.8028	35.1634	52.0204	56.7793	37.9711
SEM	3.07122	2.62049	2.71368	0.719692	3.91382	2.62032		3.45999	2.1655	2.41564	2.97979	2.30642		4.59603	3.49888	5.39427	5.91966	4.50634

## Sheet: 2-28.04.2021
	PLA							IF XAB2						IF CSA
Rawintden	NoUV	1h	2h	4h	16h	control		NoUV	1h	2h	4h	16h		NoUV	1h	2h	4h	16h
	7718755	3609976	4504976		5088868	5979584		20860501	22224125	17630976	18592547	9994804		5410517		4010488	3918641	3454626
	8152295	3952924	4759526	5396171	5161194	7883321		21277789	24732072	18153148	20221608	12147769		5673250	10027348	4057180	4366852	4832645
	8774778	4258832	4760643	6328287	5382498	7996153		22210684	24813550	19352214	20320945	13334036		6356026	10207740	4105759	4649608	5070458
	10125873	4648548	5148139	6388051	9001869	8564892		24806700	27916990	19714913	20478268	13730498		7172666	10626721	4156453	4683102	5169605
	10253773	6558833	5184098	6452834	9489373	8933603		24912014	28067792	19835971	20555661	14713937		7227912	11056673	4163374	4728809	5298057
	10353354	6961510	5212974	7243587	9738106	9003394		25676765	28229099	20310118	21235394	14763466		7242422	11519563	4754382	4825567	5721339
	10488160	7118931	5337457	8048500	10260532	9011436		26038872	28879384	20507420	21665134	16676880		7319444	11585960	4918259	4838071	5820302
	10882156	7281189	5484575	8421355	10430789	9089529		26885075	29591807	20846002	22132693	19254608		7532198	11793140	4947066	4860031	6424390
	11286782	7753921	5743535	8517943	10823257	9126742		28423743	30983818	21060762	22302273	19759102		7959375	11831360	5202525	4938339	6426626
	11914074	7783872	5780505	8629939	10824462	9379115		28462048	31254971	21150629	23164998	19774401		8317129	12016319	5271835	4965449	6514541
	11936222	8144166	5812540	8738994	10926396	10151379		28845993	31562572	21390849	23911572	20882820		8383781	12091570	5289430	5034251	6734546
	12301300	8721177	6154105	8763678	11236644	10198388		29587301	31768374	23577164	24033294	21813014		8463289	12267186	5342694	5060613	6903024
	13502890	8760309	6585451	8798334	11432435	10363978		30235110	32165139	23778676	24408453	22909333		8959934	12381400	5514317	5196228	6940694
	13647199	9047418	6591995	9143430	11844573	10422573		30734704	32414572	23795530	24720785	23219045		9005620	12745063	5581710	5216394	6940779
	13662271	9102427	6692851	9299166	12151318	10456496		30869231	33252334	23844078	24835806	23784551		9053582	12789421	5764375	5221929	7414956
	13755927	9256781	6727810	9342383	12833303	10490998		30908236	33562648	24240080	24892871	23958829		9089630	13069284	5785211	5382937	7977544
	13830677	9514356	7021528	9854456	13355323	10960518		30991994	34133435	24317492	25863215	24109308		9314382	13165691	5853842	5467155	8044573
	13889906	9552860	7148233	10134573	13437869	11008645		31189414	35030385	25272293	25882480	25015848		9352257	13756913	5978828	5583447	8071074
	14181201	10041460	7220269	10187882	13466890	11009687		31354980	35404937	25407587	25882711	26746079		9425743	14571067	6011419	5590291	8076824
	14269261	10118022	7367550	10512318	13653339	11164581		31393778	35508340	25440720	25980287	26819673		9436535	14930407	6102352	5618592	8163790
	14540203	10821262	7435087	10549968	14262000	11173733		31592814	35775646	25951066	26298756	26919719		9585953	15316772	6113552	5693936	8394888
	14824437	11196945	7499867	11031434	14771513	11445112		31733644	35781881	26238274	26377508	27805014		9605200	15890453	6252112	5775405	8478657
	14852635	11199460	7623130	11343431	14975761	11451371		31768343	36360439	26410073	26482997	28173786		9610340	16423008	6374642	5777055	8635870
	14927863	11560659	7681290	11841650	15610912	11546149		32398062	36397093	26685324	26810597	28220133		9637040	16541071	6375177	5867624	8800588
	15070223	11772637	7939076	11993464	17454854	11573404		32404556	36775741	26956975	27213590	28754275		9657822	17134339	6403035	5923569	9025988
	15618341	12044684	8233536	12029862	17579271	11588967		32864121	38008666	27004810	27838944	29165549		9718302	17461524	6419299	5998459	9043694
	16110433	12167471	8273780	12106872	17790700	12080891		33204470	38255459	27093169	28051799	29673528		9721687	18057288	6469112	6065256	9218856
	16408561	12232497	8390304	12180136	17792411	12113299		33477669	38590709	27153634	28068541	29699100		9817389	18199539	6510892	6088409	9277622
	16463087	12338167	8626184	12225636	18082920	12216252		33505405	39155232	27414881	28231732	29873961		9892762	18343163	6651672	6109422	9622233
	16516669	12502971	9064641	12352976	18427115	12462062		33606748	39396398	27662103	28494483	30574973		10133354	18362175	6664318	6428213	9953320
	16633779	13168670	9197715	13165513	20034965	12753263		33747174	40736474	27966089	28580319	30668845		10153094	19043759	6689965	6457617	10273409
	16711519	13244286	9354809	13228173	20148320	12867315		33845527	43033314	28138640	28618187	30853072		10304582	19239740	6858830	7068563	10291194
	16776576	13546349	9485887	13297604	20350958	13021680		33931156	43208171	28227086	30040974	31233885		10502810	19852675	6952615	7263512	10948403
	16793174	13657038	9516315	13505226	20739590	13145968		34190849	43718002	28407191	30217244	31880594		10527160	20149427	6996920	7315169	11005267
	16974326	14153165	10007381	13543468	21030485	13161832		34302799	44309730	28538992	30303084	32138957		10734120	20449061	7011829	7327924	11296373
	17152879	14358603	10010968	13973961	21647888	13217046		34540077	45205367	28572717	30605166	32467527		10884557	20498004	7017734	7337685	11454685
	17454774	14420545	10286255	14071289	21783683	13394467		34682153	46054568	28732119	31339169	32551630		10929729	21604362	7129201	7705027	13205512
	17508038	14494129	10333496	14203059	22753020	13484031		35504822	46436586	28820406	31654381	32802402		10982861	21819058	7134721	7837713	14852694
	18355037	14848686	10626313	14546259	23281354	13541545		35521867	47286971	28962116	31874571	33814247		11047000	22014021	7173429	7930887	15237622
	18585832	14907792	10640911	14587882	23493312	13705165		35824881	47781550	29447043	32089803	34302767		11123631	22083014	7396701	8184429
	18750993	14951577	10818002	14636818	25054544	13802774		36453930	48127293	29449835	32198399	39348854		11153607	22134805	7420074	8336289
	18865818	15289853	10839743	14747664	26335000	13823151		36622161	49383331	29452420	32760185	40623857		11171833	23008425	7622590	8378518
	19222770	15348724	11106635	15066479	26404900	14008856		36772168	49955750	29569333	32938696	41321508		11213171	23213017	7623533	8408233
	19490226	15527469	11512247	15212178	26406988	14104170		37297436	50316200	29694026	32988470	41384426		11214134	23263711	7703516	8443000
	19545478	15703218	11686225	15287177	31582724	14127812		37786027	50560440	29703767	33080585	42467074		11273053	23528718	7723733	8671664
	19627723	15721075	11750037	15664656	31690594	14251339		38186298	50895805	29793625	33080972			11305597	23547775	7736896	8724194
	20644975	15815353	11865770	15749000		14346886		39106918	52495561	29923561	33708293			11500202	23610053	7791255	8789659
	22199737	15910119	12060737	15760863		14771131		39233535	53903445	30316779	33775126			11801375	24055776	7894675	8871277
	24237344	16010653	12331026	17059347		15130027		39370872	54850455	30707582	34191133			11961132	25109153	8025549	8875210
	27164356	16105789	12415331	17329888		15150507		39434823	56326842	30804796	34205130			11974589	25586165	8059942	9005116
		16333008	12441658	18463629		15544995		39507283	59000971	30836348	34208725			12156113	27032802	8208787	9238926
		16492401	12610279	18538939		15838174		39619581	65035108	31062796	34564271			12255194	27978761	8236774	9764649
		16545630	12700444	19062884		16124440		39641831		31076327	34689351			12524859		8289515	9778257
		16604615	12816039	19346716		16316947		40003526		31172266	34914138			12728279		8307065	9857543
		18169658	13129893	19727888		16768115		40048134		31182304	35646186			12965243		8336743	9906169
		18341192	13527158	19900165		16847304		40668565		31219458	35741458			13050565		8435248	10004131
		18575730	13713622	20228696		17842732		41270567		31336020	36166294			13552595		8456793	10041897
		18653232	13726522	20394871		18012483		42037242		31388828	36266153			14324719		8503135	10182201
		18816224	13768765	20470289		18348254		42070355		31627883	36417607			14375910		8514775	10224068
		19030908	14390047	20496756		19067532		42861738		31720420	36527315			14598638		8556121	10355056
		19091111	15238227	20759093		19118277		42889999		31896720	36866887			15285596		8721926	10433939
		19163397	17342233	21166771		19125256		44106957		32093163	37352281			15907782		8762390	10704307
		19361888	18154540	21496016		19494116		44539724		32477582	37635102			15998951		8775499	10800790
		19412674	18356832	23777810		20096995		45121949		32496150	38247004			16097768		8833911	10876572
		19739494		25659739		20524286		45569696		32914436	38339811			16519280		8873462	10877803
		19861674		29902557		20691942		45915369		33028913	38521833			17353100		9377005	11008727
		20003617				20970400		46375516		33323362	39779272			17470079		9838200	11435808
		20022675				22142898		48555438		33918989	39801865			17491518		9973271	11483430
		20468048				22233072		51217481		33984173	40734581			18224581		10052432	11996909
		20533206				27051173		51548302		34215514	41638887			18738446		10104679	12035674
		20829612				29830566		52524449		34956378	41775688			18822161		10240386	12146092
		20954348				31074161		54203370		35411737	42978369			19179695		10819651	12252201
		20982184						58849341		35765964	43181005			20252728		10865292	12541472
		21212910						60598858		35977180	44157235			22389174		10994790	12623188
		21355945						61990405		36177927	45453241			22422731		11254998	12817625
		21418638								36450167	46101758			22770760		11398512	13538559
		21419957								38435006	46568877			23156245		11496208	13626243
		21890088								38948502	47549496			25539222		11590661	13820546
		21955917								40751137	48371766					12169681	13891071
		22582430								41045920	49454450					12786266	13896893
		23274363								42560338	50106453					12865904	14091360
		23810159								46501378	53518090					13529315	14257324
		24519381								47538543	53826262					14131100	14516401
		24730926								48878193	58937352					14317441	15108707
		25593752								50285148						14635465
		25620619								50947931						14815411
		27372091								51023833						14927871
		28028801								55303643						15732281
		29152468								61007138						16004371
		29552859
Moyenne	1.54591e+07	1.57632e+07	9.65262e+06	1.4029e+07	1.65223e+07	1.42739e+07		3.69375e+07	3.98965e+07	3.10603e+07	3.32052e+07	2.68917e+07		1.22562e+07	1.77056e+07	8.278e+06	8.58262e+06	8.43634e+06
SD	3.97913e+06	6.06364e+06	3.41555e+06	5.12593e+06	6.60538e+06	4.88305e+06		8.66809e+06	9.71045e+06	8.34042e+06	8.75985e+06	8.11565e+06		4.4043e+06	5.05096e+06	2.8929e+06	3.07017e+06	2.61685e+06
SEM	562734	639164	426944	635794	973910	575473		1.00091e+06	1.3466e+06	884083	955778	1.20981e+06		498689	707276	306647	334983	419032
Par rapport à NoUV
Moyenne	100	101.967	62.4398	90.7493	106.877	92.3332		100	108.011	84.0887	89.8957	72.8033		100	144.462	67.5412	70.0266	68.8331
SD	25.7397	39.2238	22.0941	33.158	42.7281	31.5869		23.4669	26.2889	22.5798	23.7153	21.9713		35.9352	41.2114	23.6035	25.0499	21.3512
SEM	3.64015	4.13455	2.76176	4.11275	6.29992	3.72255		2.70973	3.64561	2.39346	2.58756	3.27529		4.06886	5.77075	2.50197	2.73316	3.41893

## Sheet: 3-07.05.2021
	PLA							IF XAB2						IF CSA
Rawintden	NoUV	1h	2h	4h	16h	control		NoUV	1h	2h	4h	16h		NoUV	1h	2h	4h	16h
	4480089	4920800	2232034	3952818	3893651	1305952		21814870	24287531	20627952	17470946	17803605		1457130	1360260	1292374	1486328	2114831
	4545344	5532471	2710420	4325829	4442231	1543613		23635643	24461053	23617379	21811202	18060796		1463442	1363743	1556197	1534873	2144455
	4591258	6154827	2729444	4703072	4651830	1808532		28232864	24581776	25266342	23172842	19511470		1605788	1382363	1575315	1591087	2154623
	4750336	6627233	2762899	5336919	5072067	1955708		28332966	24734112	26502050	24032551	19618279		1714476	1395424	1800070	1662543	2264698
	5696125	6676381	3176867	5713383	5320297	2160189		29161117	25145144	27746888	24375474	20269175		1721025	1410771	1846489	1751988	2471688
	5965332	6729024	3495636	5911514	5825977	2290328		30426284	25151841	28738020	24608473	20360200		1765343	1493641	1879507	1816329	2514150
	6029618	6746990	3570171	5948879	5880105	2429344		30465369	25745268	29499779	24755128	20911295		1790350	1559025	1975803	1861375	2525824
	6197962	7019621	3574271	6286781	6178936	2470388		30900058	26257619	29597616	25325621	23662419		1804085	1614325	2018678	1880786	2583613
	6560145	7261040	3787955	6451505	6222950	2496101		31795662	27418303	30779144	26075249	24644438		1890988	1627744	2026378	1926980	2596746
	6806467	7344456	3872367	6663557	6229298	2496938		32135340	27575831	31033026	26628442	25953831		1929548	1653645	2139624	1976665	2606891
	6833882	7433376	3925680	6906776	6253790	2526233		32779431	27802161	31151673	26731329	26867274		1982135	1656478	2179568	1978266	2662222
	6896661	7558676	4025055	6931132	6290251	2555512		32885366	27999812	32090824	26820410	27582512		1992172	1669515	2217625	2094782	2816440
	6932999	7599887	4044417	6977292	7134252	2703126		33250792	28242330	32356643	27371639	28156958		1993182	1717848	2269080	2111359	2855837
	7113354	7761475	4068962	7058746	7151737	2834987		33849740	28599256	32960538	28036591	28209341		2009785	1718055	2293331	2126577	2900090
	7206478	7807633	4112856	7259990	7252749	2854325		34291810	29261801	33119794	28210754	28463002		2010175	1756806	2308331	2128057	2909959
	7211072	7822774	4213162	8049431	8207230	2866421		34671494	29367191	33922125	28607997	28680762		2013076	1759035	2310874	2148287	2923062
	7277624	7906863	4388389	8076410	8464445	2905040		34798765	29485625	34074023	29416369	28959924		2019513	1775926	2342515	2182920	2973293
	7472502	8110292	4390322	8164090	8567182	2905333		35168835	29758242	34470627	29655203	29613602		2026184	1778286	2352530	2210833	3006320
	7525980	8245174	4395458	8167284	8924340	2919393		35356238	29895048	34731060	29670128	29638271		2032948	1804460	2359059	2225929	3009262
	7627383	8445956	4396916	8262172	8956315	2938844		35359799	29986644	35594679	29811653	29989708		2034756	1823103	2398898	2237410	3023385
	8031634	8495550	4422404	8321577	8992149	2968889		35893819	30056046	35659287	29926353	30277114		2047559	1831448	2425991	2270074	3261335
	8122078	8562261	4557804	8412740	9294389	2974005		36180764	30065361	35818733	30047611	30966343		2052923	1832637	2450096	2276494	3263886
	8328899	8649035	4575241	8487649	9329474	2989232		36593912	30196133	35820010	30054658	30971398		2063990	1832964	2552889	2284212	3265514
	8332663	8698194	4884314	8590720	9664481	2998734		36773427	30288077	35837678	30137476	31132597		2083256	1852310	2589035	2298687	3272497
	8404713	8830420	4885563	8604706	9758027	3024987		37509556	30813646	36066361	30274607	31172727		2117898	1881112	2590747	2322165	3273657
	8446475	8975823	4989390	8753668	10057942	3031652		37558912	31124164	36135906	30463423	31174137		2167100	1886012	2604289	2327239	3338792
	8576657	9075705	5030975	8803658	10244644	3120648		37587887	31229077	36708075	30491715	31258425		2233260	1919081	2626219	2328818	3398699
	8710988	9076952	5111451	8916814	10448961	3195303		38076832	31722936	37003382	30796722	31464823		2244306	1921167	2639615	2377639	3447903
	8790638	9203291	5177844	9643108	10664944	3406250		38264830	31881896	37171366	30980243	31659703		2251891	1992219	2651491	2388101	3468493
	8851589	9358857	5234171	9682285	10686204	3473154		38613490	32065550	37495020	31081631	32720772		2271380	2043906	2651782	2390464	3485460
	8871079	9362353	5369951	9697386	10748859	3523545		38941625	32324424	37746823	31294932	32837142		2295720	2082298	2700695	2426807	3512427
	9420962	9534963	5444872	9774889	10813557	3587352		39011910	33388835	38274978	31701579	33344281		2317605	2110514	2755189	2439426	3573469
	9505719	9541312	5518707	9790357	10917515	3616751		39873076	33484554	38543318	31735949	33456113		2350579	2155537	2781691	2440813	3593032
	9518931	9546068	5518877	9936662	10936708	3635594		39880589	33744366	38935670	32524420	33654779		2362728	2161531	2827396	2449031	3595361
	9627536	9607766	5554849	9977425	11061988	3658922		40175362	33864450	39481396	32650278	33816777		2382796	2166554	2881675	2449153	3657416
	9649775	9656204	5687913	10041864	11154004	3698719		40184057	34031206	39891485	32812559	34114916		2415515	2253802	2884486	2457465	3672236
	9706630	9770555	5723344	10151494	11198958	3739797		40244028	34451726	39977773	32876160	34148564		2451577	2257240	2912477	2510272	3811449
	9760501	9868280	5759948	10249493	11232307	3749269		40390609	34587871	40009912	33504451	34631383		2452281	2277313	2975426	2543773	3841876
	9777650	9907649	5798745	10301065	11298675	3779345		40536615	34621236	40259718	33666331	34653571		2458193	2339246	2989385	2552060	3857172
	10052291	9930562	5825133	10378006	11387701	3781431		40625037	34967347	40926894	33738667	35040522		2459581	2445617	3005823	2565596	3866151
	10141097	9931664	5843580	10429839	11510088	3795682		40678184	35096481	41220013	34276731	35268847		2463803	2475265	3060940	2616152	3869270
	10225003	10024818	5866309	10479974	11729454	3810689		40740913	35206525	41377315	34418787	35368164		2503103	2484548	3095325	2617152	3987295
	10381423	10047747	5883311	10803849	11949191	3824137		41424803	35324327	41438980	34698682	35742368		2522012	2486610	3166760	2682289	3998304
	10707447	10113060	5905146	10914098	12062842	3914530		41727729	35479593	41946152	34704639	36053811		2532000	2521163	3261877	2703693	4031308
	10782855	10250066	5943952	10973597	12080643	3955614		42119178	36025673	42153461	34724653	36106054		2532362	2698111	3465848	2709000	4081882
	11126422	10314718	6026436	10979916	12289405	4071579		42214079	36176000	42521700	34966754	36363901		2548674	2758054	3539547	2711050	4243737
	11257890	10336965	6061759	11053158	12492913	4139602		42341024	36287451	43035156	35228354	36443377		2564384	2762091	3958869	2741351	4267229
	11281834	10384224	6203339	11118905	12511116	4168443		42826556	36350312	43501406	35240692	37434121		2565305	2775662	4024888	2836033	4565277
	11298807	10773590	6226728	11282451	12822816	4174454		42882283	36539989	44084378	35250984	38059458		2581040	2800200	4065857	2926790	4696084
	11337059	10775289	6253308	11315562	12878387	4188800		42911758	37103225	44682908	36417145	38435292		2588245	2809199	4104634	3054534	4701176
	11433346	11000609	6257415	11394454	13224977	4204715		43049842	37550146	44939685	36566117	38753538		2607159	2827424	4166219	3074620	4707153
	11512565	11097134	6332218	11571612	13702448	4328951		43063200	37823789	45138128	36888203	39972772		2619283	2864465	4213837	3176053	4715000
	11694546	11111497	6368643	11660254	14079903	4377248		43117433	37939322	45576148	37444683	40228742		2644821	2896683	4293647	3261576	4730027
	11894733	11157565	6401900	11763457	14144457	4411020		43409863	37965115	45678254	37453594	40275195		2653914	2967757	4342256	3344187	4730338
	12051729	11157714	6484199	11815540	14522486	4422959		44394650	38444510	46810139	37516579	40711293		2700035	3026147	4360239	3431164	4780767
	12083499	11300411	6556794	11892583	14647613	4437417		44620560	38462782	47012343	37724833	41053093		2745480	3046806	4447071	3454683	4804148
	12382151	11326245	6611668	11958243	14850966	4485446		44675331	38500235	47133280	38758274	41743198		2745737	3056161	4487719	3464518	4900563
	12571437	11396894	6636069	12383675	15007355	4486055		45135015	38527809	47550526	38845515	42183372		2790116	3137031	4523401	3529086	5039850
	12572896	11689217	6667300	12647080	15225191	4559955		45282599	39284248	47738436	39374483	43810284		2801126	3201554	4634245	3562486	5066169
	12933723	11821247	6797650	12662002	15366160	4685556		45792565	39508089	48262480	39601577	44386218		2811714	3236060	4754344	3674699	5127817
	13082773	11992764	6877844	13128951	16685526	4699913		46091767	39897239	48569976	40073592	44976289		2817311	3398165	4804154	3685545	5303548
	13156793	12101340	6925005	13597383	17196276	4700006		46133836	40516509	51091444	40200944	45084714		2863236	3462791	4821258	3953639	5503969
	13506073	12305090	6966714	13770958	17832467	4709759		46143432	41752473	51560729	40643511	45092900		2871384	3515447	4897046	4283192	5889020
	13803896	12475994	7151898	14915253	19043747	4765654		46238917	41989452	51852950	41705389	45996026		2875690	3684471	5083273	4566122	5996976
	14145032	12532653	7226708	15263911	20276887	4816170		46664423	42782129	51867159	42374476	46265962		2879105	3710962	5087973	4646511	6085147
	14321789	12556550	7240261	15671560		4951485		46725940	43213564	52048520	42387733	46524294		2920383	3815461	5184169	4852071	6119248
	14833458	12567167	7451594	16514380		4965099		47415544	43213605	52750272	43695164	48554597		2960372	3838951	5187146	4990840	6588979
	15005202	12613528	7567098	17044447		4969942		47760299	45259112	53949408	44955982	48715331		3050795	3863004	5274375	5014691	6615274
	15072760	12744567	7682347	17583349		5005744		48102555	45915358	56932777	45169794	50177856		3133063	3945122	5284785	5037675	6685451
	15077389	12844196	7757068			5032726		48272374	46232752	57231603	47241393	51154350		3194419	3961893	5311271	5054754	6848765
	15266291	12852379	7761948			5050839		49047005	46534227	59985354	47453340	55441092		3233861	4094286	5359580	5082470	6947325
	15372718	12924010	7782648			5129275		50079348	46693433	60567304	47833314	57055500		3238536	4099476	5417395	5132374	7104107
	15440507	12987388	7809720			5204553		50118622	47368735	60632011	48086435	57868220		3366959	4109537	5979324	5278157
	15919550	13010693	7888681			5310051		51175049	48488227	60840846	48977785	58058584		3487913	4125255	5988377	5322449
	15920211	13114480	7980829			5359287		51219360	49467063	62432690	49379869			3594136	4156829	6027647	5328590
	15943457	13368348	8009262			5376742		51990361	49922568	62720242	51842108			3594495	4194562	6368983	5355712
	16511902	13457049	8295469			5389202		52187686	50410185	65309274	52009013			3596685	4234769	6402432	5416951
	16760626	13486169	8316379			5460735		53194921	50810544	65661573	52213470			3722133	4238183		5432981
	17134492	13561154	8814223			5501360		53343844	51372265		53001000			3746751	4280644		5435822
	17461945	13581566	8898865			5554781		53432937	51575222		54361710			3890013	4318165		5617419
	17529236	13844187	9145449			5615289		53606845	52133221		54874618			3921246	4331472		5658554
	17683878	14063577	9172594			5653825		54621847	52269863		62166346			3986416	4380830		5711507
	18042378	14124271	9308242			5753243		54956779	52404914		62221537			4206149	4397543		5711917
	18382340	14193239	9881485			5868212		55867640	52751701		63392957			4268968	4549085		5824678
	18492980	14800460	10285679			5913479		57466268	53976500		65670980			4337351	4558849		5882612
	19023701	14918087	10347818			5998601		57952539	55059829		67655978			4337948	4601080		6205290
	19047461	15275325	10698484			6162052		59325289	55885371		68039900			4399259	4602518		6226352
	19222884	15337002	10699894			6392703		59741339	56004439					4587800	4654772		6758296
	19339751	15463386	10981823			6529095		61421654	57214939					4641937	4852619
	19518988	15649734	11154909			6606625		61459150	57470324					4665875	4855953
	19658180	15693227	11354812			6639908		61863289	57711233					4706176	4905740
	19797169	15696993	11484661			6763052		62601373	57873543					4911652	4917396
	20310999	15809677	12346861			7104114		63151935	58449532					5042096	5034410
	20524438	16120326	12658271			7130304		63241319	58491019					5075622	5167165
	20739055	16528319	13014776			7470976		63636678	59620473					5086951	5198626
	21289360	16629712	13657595			8153012			60333493					5207755	5244454
	21940008	17670882	14687176			9604241			61757640					5221611	5259414
	22066399	17697385				9621112			65113867					5495355	5322657
	22130361	18176892							65120585					5595599	5349916
	22715966								65379956					5731914	5518908
									65680420					6089754	5648533
									66762426						5708676
									67192556						5841477
									68248819						6196544
									69183341						6350018
									69947290						6389808
									69975675						6719866
									72340394						6788738
									72932574						6806747
									75357782						7353517
Moyenne	1.23907e+07	1.11125e+07	6.69647e+06	9.9457e+06	1.0753e+07	4.34996e+06		4.35883e+07	4.28574e+07	4.20955e+07	3.74836e+07	3.55245e+07		2.98823e+06	3.37227e+06	3.48163e+06	3.36443e+06	4.03119e+06
SD	4.87999e+06	3.01557e+06	2.61455e+06	2.98583e+06	3.66999e+06	1.59612e+06		9.49893e+06	1.36858e+07	1.03069e+07	1.10504e+07	9.45429e+06		1.10301e+06	1.52537e+06	1.332e+06	1.42781e+06	1.30034e+06
SEM	487999	303076	265468	359452	455206	161232		974570	1.30489e+06	1.16702e+06	1.18473e+06	1.09904e+06		109753	145438	151795	152205	153246
Par rapport à NoUV
Moyenne	100	89.6841	54.0443	80.2674	86.7827	35.1066		100	98.3233	96.5752	85.9947	81.5		100	112.852	116.511	112.589	134.902
SD	39.3843	24.3373	21.1009	24.0973	29.6189	12.8815		21.7924	31.3978	23.6459	25.3518	21.69		36.9118	51.0459	44.5748	47.7811	43.5153
SEM	3.93843	2.44599	2.14247	2.90098	3.67377	1.30123		2.23585	2.99366	2.67738	2.718	2.52141		3.67286	4.86703	5.07977	5.09349	5.12833

## Sheet: Moyenne des 3
	PLA							IF XAB2						IF CSA
31.03.21	No UV	1h	2h	4h	16h	XAB2-GFP		NoUV	1h	2h	4h	16h		NoUV	1h	2h	4h	16h
	8575474	3591986	1562952			2340034		18616965	25831941		22180549	17219006		3700759	4005220	2611752	3398531	3469532
	8893434	4311535	4074497		7801359	3095625		19094286	28954792	18956398	23093943	18437718		3835373	4426628	4216280	3915833	4106217
	9460374	6090294	7206372		8779827	4542409		19382650	30048745	19702607	24596514	19380327		3878730	4647807	4332495	4065417	4724528
	10592213	6218357	7288559		10107313	4733324		20355181	30127224	20919559	25088312	19764941		3911733	4680582	4932193	4071375	4842316
	10682704	6580278	7929801		10119852	7224479		22016387	30478471	21339127	25397702	20231126		3956601	4938648	4935078	4475171	4940507
	10873891	7487334	8039985		10184548	7789795		25679016	30643321	21808744	26092758	20812381		4359557	4972955	5007578	4479374	5184057
	12818201	7796894	8343984		10274495	7941928		27578239	30787739	22111147	26194718	22195426		4381958	5045135	5153022	4756101	5245766
	12927960	7995033	8720408		10361509	8296108		28957325	31218834	22969962	26257495	22279111		4407330	5101203	5284107	4867302	5268448
	12955128	8548929	8792788		10773610	8362072		29627837	31296623	23090703	26977857	22670242		4450806	5175110	5332835	5559430	5279250
	13143859	9038985	8853219		11002984	8753697		29925502	31318005	23336459	27065769	23185928		4612590	5233129	5587021	5597266	5371331
	13170746	9109294	8919671		11421404	9002933		30998609	31422596	24145976	27231879	24015729		4739092	5309960	5695549	5691784	5413881
	13432643	9123422	9078667		11930259	9064003		31345571	31612210	24644992	27578626	24698126		4783643	5540798	5980460	5697220	5430646
	13496123	9199569	9509335		12100124	9320440		31935605	31871343	24919353	27928920	26264606		4868889	5611377	6039383	5837911	5593502
	13821612	9296802	9644823		12473209	9372184		32432911	32109721	25675857	28282955	26500762		5045664	5647638	6067329	6008292	5839476
	13854673	10019292	9726874		13337919	9887412		32736510	32129447	25711690	28606983	26604359		5063264	5673475	6077694	6116658	6062679
	14421660	10268592	9908270		13412626	9898822		33011156	32179303	25794851	29773752	27402650		5066030	5721069	6163339	6164525	6098062
	14439473	10456994	9985482		13455224	9968015		33210453	32284416	25825252	30112817	27632682		5331162	5781773	6177664	6174084	6098347
	14536727	10582933	10550130		13578063			34742315	32723739	26048911	30325675	27685055		5426832	5795730	6232758	6206478	6100391
	14634897	11101283	10643736		13809104			34745427	33124512	26097870	30356043	28003793		5467258	5803240	6337735	6226042	6117580
	14650150	11109770	10696235		14210187			34752578	33136531	26426902	30524845	28083592		5589226	5827072	6461121	6336340	6307684
	14754259	11188746	10779688		14622094			35019270	33209594	27118902	30611944	28139957		5600354	5870733	6474952	6409211	6737301
	14843742	11255772	10941833		14706215			35161952	33427030	27229702	31242873	28354622		5724256	5937457	6573071	6466630	6829906
	14951481	11261006	10953958		14761331			36132329	34201364	27424149	31363161	30180895		5847593	5951806	6681086	6575739	6832019
	15182456	11383325	11170767		15053754			36250215	34211091	28926161	31976204	30219258		5927495	6054383	6773963	6718948	6854157
	15650725	11640428	11518917		15178738			36633729	34343668	29308630	32100946	30399959		5940580	6101680	6849389	6923361	6896457
	15889021	12004355	11961536		15291062			36737559	34678166	29516497	32511601	30957813		6115571	6107267	6890404	7149040	6910204
	16227136	12039823	12395251		15303518			36766951	35270986	29706187	32726512	31137038		6204183	6118303	6895381	7344712	6937251
	16241804	12128685	12439204		15565260			37351566	35312517	29763519	32767063	31252573		6215337	6226322	6901274	7425248	7084513
	16343703	12217334	12490187		16208018			37958373	35420432	29801061	32827041	31333969		6639441	6288071	6974179	7535203	7403455
	16345132	12470748	12514260		16385369			38367885	35547398	30873955	33217036	31366463		6658937	6333830	7008139	7592619	7488429
	16746559	12546840	12523105		16519986			39352147	35695307	30883631	33854406	31633488		6666740	6367101	7152888	7669596	7576894
	16871012	13931005	12744713		16649313			39983654	36162707	31029331	34732409	31687892		6783511	6391507	7364942	7818300	7578806
	16954372	13965184	12826922		17084295			40418064	36652985	31388995	34763672	31947443		6809569	6400822	7375245	7903243	7597487
	17038208	14558053	12877955		17505708			40730162	37106122	31983772	34988408	32069511		6895253	6421482	7385873	8082278	7618853
	17048098	14681763	12936434		17810740			40797054	37290211	32172715	35083759	32157551		7155371	6454182	7389710	8257792	7759145
	17174066	14719149	12990769		18309419			40940321	37298259	32332256	35448344	32818276		7349146	6468313	7393283	8338325	7851825
	17420546	14768888	13014605		18553030			41100000	37488200	32655009	35771701	32945893		7645667	6526007	7416663	8375524	7982561
	17721871	14968238	13100379		18742667			43026858	37500702	32740713	36746336	33043029		7691550	6649972	7620423	8556334	8030176
	17777484	15120066	13160080		18977546			43400144	38666074	33507760	37145456	34190499		7735248	6681852	7638416	8963701	8243317
	17784776	15216564	13307610		19204684			44638770	38882278	33809535	38087368	35182001		8137900	6682708	7759623	8991567	8407108
	17861300	15226588	13429449		20074865			44652500	38908139	33962175	38194034	35316145		8200103	6698149	7809393	9109290	8472290
	18029373	15227102	13453782		20652824			44905097	39009299	33962790	38550144	35341119		8373353	6769790	7810443	9609038	8474804
	18060527	15275490	13502807		21123120			45712569	39115042	34002745	40927428	35846488		8455550	6842683	7848599	9684825	8490670
	18095659	15348293	13564193		21313124			46142326	39620636	34552457	41210585	36047217		8681246	6886910	7914485	9728886	8539540
	18276030	15677981	13599321		21668642			46459706	39636321	34607148	41715570	36208422		8917690	7063413	8101947	9751749	8545890
	18331433	15706204	13606730		21783676			46553706	39638772	35279506	42686302	36543903		9210773	7074571	8548763	9857198	8587978
	18416397	15767707	14003029		21885993			46659489	39668647	35328044	42984559	36948476		9285218	7076616	9193846	10093642	8720040
	18640177	15854352	14305667		23051585			46944544	39704758	35487432	43083777	36959489		9394874	7110880	9320544	10278547	8856682
	18857586	15957031	14566061		23686150			47944750	39792418	35748330	43105855	37414276		9446001	7160131	9614039	10401202	9141779
	18858283	15959396	14582941		24161259			49210745	39965864	36219131	43230016	37544603		9647711	7200689	9678151	10430641	9564582
	19227503	16038409	14761324		24473505			50712183	40000416	36389098	43510605	37573066		9671647	7280731	9739979	10689983	10186385
	19316445	16277411	14793294		25093602			52320336	40039074	36567898	44569704	37736331		9851917	7373336	9743886	10740827	10443007
	19436523	16441290	14933394		25395068			53954034	40187043	36647212	44689929	40346914		9870024	7471695	10121082	10746763	10849633
	19901644	16574788	15067610		26108799			54015427	40611933	37042154	44754267	41779891		9918890	7501719	10224094	11223500	10950621
	19903708	16604552	15126838		26917132			54487360	40832372	37288643	44790248	42087619		10241909	7555520	10257325	11331883	11171792
	20553130	16615019	15134786		26999031			54540659	41318197	37846759	44817599	42629395		10467697	7880872	10411940	11706988	11383166
	20760191	16659591	15295550		28296847			55131333	41371819	38124738	44898171	42750008		10516434	7937156	10728340	11997975	11389669
	20988043	16683736	15324028		30792086			55428379	41455266	38950770	46136542	43351832		10618208	8029990	10906223	12258611	11627257
	21099911	16727724	15365184					56087523	41579304	39016870	46401904	43522148		10670476	8134474	10959189	12312768	11728509
	21323781	16850957	15388642					56240486	41656684	39082926	46451047	44304155		10963495	8216109	11021531	12745912	11882739
	21363819	16930374	15494409					57036426	41661757	39333770	46455613	45712985		10991596	8270491	11227008	13002199	12370494
	21370612	16930459	15523655					57318553	41882219	39395020	48445496	46455037		12091749	8363244	11289612	13368846	12821680
	21564298	17403348	15524456					57514776	42082613	40160288	48473464	46740371		12187729	8409310	11302180	13607975	13101001
	22532241	17543669	16589591					58371042	42160492	40538255	48830545	47395747		12459052	8497674	11423425	14352875	13116023
	22565358	17633809	16672727					58788518	43271685	41255619	50343830	51614441		12775023	8530401	11439321	14597154	13474103
	22919658	17862904	16686945					59081981	43682532	41362810	50784755	51635626		12857411	8550519	11459547	14877750	14160544
	22959949	17872538	17373579					59967442	44265100	41405516	51477548	52466467		13118266	9076146	11950270	14977127	14214274
	23322404	18022998	17678936					60086946	44524463	41967664	51858964			13147188	9084372	12191727	15360171	14984388
	23362967	18105910	17960261					60365567	45058153	42508821	53722487			13291729	9176533	12194143	15366991	15336241
	23535201	18267486	18506129					61520197	45451565	42677542	53831918			13446041	9200075	12238096	15435905	15835846
	23868446	19040208	18695815					62722802	45509605	42709936	54645942			14242096	9245379	12879476	15550419	17137065
	24248294	19044453	18716004					64112202	45604705	43308492	54671270			14478387	9246140	12887454	16026283
	24783090	19254020	18770440					65533325	45976664	43633612	55372225			15226653	9376770	13198125	16050427
	25740764	19269485	18942206					65579036	47257819	44759350	55831956			15366683	9409700	13303752	16070439
	25918539	19352616	19436211					66848912	47421863	45333670	56126264			15620127	9519644	13426100	16237786
	26148026	19636846	19644794					70316609	47527679	45827554	56557473				9618835	13450904	16324247
	26181474	19815808	19705357					73605563	48012619	46893525	58580644				9788990	13685258	16361603
	26407853	19850008	19819185					74817260	48341569	48208248	58837010				10154483	14321797	16377250
	28034126	19863704	20475979					75323369	48681330	48751764	58867827				10358780	14366861	16466578
	28238133	19999334	20808711						48900486	48790198	59231575				10461280	14487508	16635556
	29923250	20015029	20889999						49583309	49855761	59253975				10612527	15455034	16670770
	31544523	20329550	21196246						49826718	50684321	59296954				10832405	16615119	17036742
	31814639	20644655	21225092						51408404	51147068	59770581				10966713	16990947	17413552
	31981278	21139563	21347730						53177793	52180751	60012804				11176080	17186414	17767695
		21930131	21472468						54442533	54441101	60906641				11245864	17330570	17873113
		22447506	22416978						54983095	54494381	63930306				11352840	17450852	18021332
		23139831	22596120						55077446	54861578	64188812				11618085	17873783	18379430
		23374939	22697243						55539912	56901780	66159390				11931050	17892196	18471812
		24060061	22734683						55718759	57202215	68323088				12158985	19193500	18493492
		25557478	23310480						56987140	57635825	68548678				12584909	19363165	19868162
			27554848						57566936	58252366	70416115				12691447	20320104	20505110
			27909861						57585414	59942300	70789129				12711436	20336328	20541063
									58932535	61883233					12848760	20784036
									59653609						13209894
									62691770						13442306
									62996842						14241369
									63403619						14822308
									63463110						14978893
									65363569						15253554
									65792438						16121952
									67806459						17366197
	7718755	3609976	4504976		5088868	5979584		20860501	22224125	17630976	18592547	9994804		5410517		4010488	3918641	3454626
	8152295	3952924	4759526	5396171	5161194	7883321		21277789	24732072	18153148	20221608	12147769		5673250	10027348	4057180	4366852	4832645
	8774778	4258832	4760643	6328287	5382498	7996153		22210684	24813550	19352214	20320945	13334036		6356026	10207740	4105759	4649608	5070458
	10125873	4648548	5148139	6388051	9001869	8564892		24806700	27916990	19714913	20478268	13730498		7172666	10626721	4156453	4683102	5169605
	10253773	6558833	5184098	6452834	9489373	8933603		24912014	28067792	19835971	20555661	14713937		7227912	11056673	4163374	4728809	5298057
	10353354	6961510	5212974	7243587	9738106	9003394		25676765	28229099	20310118	21235394	14763466		7242422	11519563	4754382	4825567	5721339
	10488160	7118931	5337457	8048500	10260532	9011436		26038872	28879384	20507420	21665134	16676880		7319444	11585960	4918259	4838071	5820302
	10882156	7281189	5484575	8421355	10430789	9089529		26885075	29591807	20846002	22132693	19254608		7532198	11793140	4947066	4860031	6424390
	11286782	7753921	5743535	8517943	10823257	9126742		28423743	30983818	21060762	22302273	19759102		7959375	11831360	5202525	4938339	6426626
	11914074	7783872	5780505	8629939	10824462	9379115		28462048	31254971	21150629	23164998	19774401		8317129	12016319	5271835	4965449	6514541
	11936222	8144166	5812540	8738994	10926396			28845993	31562572	21390849	23911572	20882820		8383781	12091570	5289430	5034251	6734546
	12301300	8721177	6154105	8763678	11236644			29587301	31768374	23577164	24033294	21813014		8463289	12267186	5342694	5060613	6903024
	13502890	8760309	6585451	8798334	11432435			30235110	32165139	23778676	24408453	22909333		8959934	12381400	5514317	5196228	6940694
	13647199	9047418	6591995	9143430	11844573			30734704	32414572	23795530	24720785	23219045		9005620	12745063	5581710	5216394	6940779
	13662271	9102427	6692851	9299166	12151318			30869231	33252334	23844078	24835806	23784551		9053582	12789421	5764375	5221929	7414956
	13755927	9256781	6727810	9342383	12833303			30908236	33562648	24240080	24892871	23958829		9089630	13069284	5785211	5382937	7977544
	13830677	9514356	7021528	9854456	13355323			30991994	34133435	24317492	25863215	24109308		9314382	13165691	5853842	5467155	8044573
	13889906	9552860	7148233	10134573	13437869			31189414	35030385	25272293	25882480	25015848		9352257	13756913	5978828	5583447	8071074
	14181201	10041460	7220269	10187882	13466890			31354980	35404937	25407587	25882711	26746079		9425743	14571067	6011419	5590291	8076824
	14269261	10118022	7367550	10512318	13653339			31393778	35508340	25440720	25980287	26819673		9436535	14930407	6102352	5618592	8163790
	14540203	10821262	7435087	10549968	14262000			31592814	35775646	25951066	26298756	26919719		9585953	15316772	6113552	5693936	8394888
	14824437	11196945	7499867	11031434	14771513			31733644	35781881	26238274	26377508	27805014		9605200	15890453	6252112	5775405	8478657
	14852635	11199460	7623130	11343431	14975761			31768343	36360439	26410073	26482997	28173786		9610340	16423008	6374642	5777055	8635870
	14927863	11560659	7681290	11841650	15610912			32398062	36397093	26685324	26810597	28220133		9637040	16541071	6375177	5867624	8800588
	15070223	11772637	7939076	11993464	17454854			32404556	36775741	26956975	27213590	28754275		9657822	17134339	6403035	5923569	9025988
	15618341	12044684	8233536	12029862	17579271			32864121	38008666	27004810	27838944	29165549		9718302	17461524	6419299	5998459	9043694
	16110433	12167471	8273780	12106872	17790700			33204470	38255459	27093169	28051799	29673528		9721687	18057288	6469112	6065256	9218856
	16408561	12232497	8390304	12180136	17792411			33477669	38590709	27153634	28068541	29699100		9817389	18199539	6510892	6088409	9277622
	16463087	12338167	8626184	12225636	18082920			33505405	39155232	27414881	28231732	29873961		9892762	18343163	6651672	6109422	9622233
	16516669	12502971	9064641	12352976	18427115			33606748	39396398	27662103	28494483	30574973		10133354	18362175	6664318	6428213	9953320
	16633779	13168670	9197715	13165513	20034965			33747174	40736474	27966089	28580319	30668845		10153094	19043759	6689965	6457617	10273409
	16711519	13244286	9354809	13228173	20148320			33845527	43033314	28138640	28618187	30853072		10304582	19239740	6858830	7068563	10291194
	16776576	13546349	9485887	13297604	20350958			33931156	43208171	28227086	30040974	31233885		10502810	19852675	6952615	7263512	10948403
	16793174	13657038	9516315	13505226	20739590			34190849	43718002	28407191	30217244	31880594		10527160	20149427	6996920	7315169	11005267
	16974326	14153165	10007381	13543468	21030485			34302799	44309730	28538992	30303084	32138957		10734120	20449061	7011829	7327924	11296373
	17152879	14358603	10010968	13973961	21647888			34540077	45205367	28572717	30605166	32467527		10884557	20498004	7017734	7337685	11454685
	17454774	14420545	10286255	14071289	21783683			34682153	46054568	28732119	31339169	32551630		10929729	21604362	7129201	7705027	13205512
	17508038	14494129	10333496	14203059	22753020			35504822	46436586	28820406	31654381	32802402		10982861	21819058	7134721	7837713	14852694
	18355037	14848686	10626313	14546259	23281354			35521867	47286971	28962116	31874571	33814247		11047000	22014021	7173429	7930887	15237622
	18585832	14907792	10640911	14587882	23493312			35824881	47781550	29447043	32089803	34302767		11123631	22083014	7396701	8184429
	18750993	14951577	10818002	14636818	25054544			36453930	48127293	29449835	32198399	39348854		11153607	22134805	7420074	8336289
	18865818	15289853	10839743	14747664	26335000			36622161	49383331	29452420	32760185	40623857		11171833	23008425	7622590	8378518
	19222770	15348724	11106635	15066479	26404900			36772168	49955750	29569333	32938696	41321508		11213171	23213017	7623533	8408233
	19490226	15527469	11512247	15212178	26406988			37297436	50316200	29694026	32988470	41384426		11214134	23263711	7703516	8443000
	19545478	15703218	11686225	15287177	31582724			37786027	50560440	29703767	33080585	42467074		11273053	23528718	7723733	8671664
	19627723	15721075	11750037	15664656	31690594			38186298	50895805	29793625	33080972			11305597	23547775	7736896	8724194
	20644975	15815353	11865770	15749000				39106918	52495561	29923561	33708293			11500202	23610053	7791255	8789659
	22199737	15910119	12060737	15760863				39233535	53903445	30316779	33775126			11801375	24055776	7894675	8871277
	24237344	16010653	12331026	17059347				39370872	54850455	30707582	34191133			11961132	25109153	8025549	8875210
	27164356	16105789	12415331	17329888				39434823	56326842	30804796	34205130			11974589	25586165	8059942	9005116
		16333008	12441658	18463629				39507283	59000971	30836348	34208725			12156113	27032802	8208787	9238926
		16492401	12610279	18538939				39619581	65035108	31062796	34564271			12255194	27978761	8236774	9764649
		16545630	12700444	19062884				39641831		31076327	34689351			12524859		8289515	9778257
		16604615	12816039	19346716				40003526		31172266	34914138			12728279		8307065	9857543
		18169658	13129893	19727888				40048134		31182304	35646186			12965243		8336743	9906169
		18341192	13527158	19900165				40668565		31219458	35741458			13050565		8435248	10004131
		18575730	13713622	20228696				41270567		31336020	36166294			13552595		8456793	10041897
		18653232	13726522	20394871				42037242		31388828	36266153			14324719		8503135	10182201
		18816224	13768765	20470289				42070355		31627883	36417607			14375910		8514775	10224068
		19030908	14390047	20496756				42861738		31720420	36527315			14598638		8556121	10355056
		19091111	15238227	20759093				42889999		31896720	36866887			15285596		8721926	10433939
		19163397	17342233	21166771				44106957		32093163	37352281			15907782		8762390	10704307
		19361888	18154540	21496016				44539724		32477582	37635102			15998951		8775499	10800790
		19412674	18356832	23777810				45121949		32496150	38247004			16097768		8833911	10876572
		19739494		25659739				45569696		32914436	38339811			16519280		8873462	10877803
		19861674		29902557				45915369		33028913	38521833			17353100		9377005	11008727
		20003617						46375516		33323362	39779272			17470079		9838200	11435808
		20022675						48555438		33918989	39801865			17491518		9973271	11483430
		20468048						51217481		33984173	40734581			18224581		10052432	11996909
		20533206						51548302		34215514	41638887			18738446		10104679	12035674
		20829612						52524449		34956378	41775688			18822161		10240386	12146092
		20954348						54203370		35411737	42978369			19179695		10819651	12252201
		20982184						58849341		35765964	43181005			20252728		10865292	12541472
		21212910						60598858		35977180	44157235			22389174		10994790	12623188
		21355945						61990405		36177927	45453241			22422731		11254998	12817625
		21418638						66867855		36450167	46101758			22770760		11398512	13538559
		21419957						69168048		38435006	46568877			23156245		11496208	13626243
		21890088						74098336		38948502	47549496			25539222		11590661	13820546
		21955917								40751137	48371766					12169681	13891071
		22582430								41045920	49454450					12786266	13896893
		23274363								42560338	50106453					12865904	14091360
		23810159								46501378	53518090					13529315	14257324
		24519381								47538543	53826262					14131100	14516401
		24730926								48878193	58937352					14317441	15108707
		25593752								50285148						14635465
		25620619								50947931						14815411
		27372091								51023833						14927871
		28028801								55303643						15732281
		29152468								61007138						16004371
		29552859
	4480089	4920800	2232034	3952818	3893651	1305952		21814870	24287531	20627952	17470946	17803605		1457130	1360260	1292374	1486328	2114831
	4545344	5532471	2710420	4325829	4442231	1543613		23635643	24461053	23617379	21811202	18060796		1463442	1363743	1556197	1534873	2144455
	4591258	6154827	2729444	4703072	4651830	1808532		28232864	24581776	25266342	23172842	19511470		1605788	1382363	1575315	1591087	2154623
	4750336	6627233	2762899	5336919	5072067	1955708		28332966	24734112	26502050	24032551	19618279		1714476	1395424	1800070	1662543	2264698
	5696125	6676381	3176867	5713383	5320297	2160189		29161117	25145144	27746888	24375474	20269175		1721025	1410771	1846489	1751988	2471688
	5965332	6729024	3495636	5911514	5825977	2290328		30426284	25151841	28738020	24608473	20360200		1765343	1493641	1879507	1816329	2514150
	6029618	6746990	3570171	5948879	5880105	2429344		30465369	25745268	29499779	24755128	20911295		1790350	1559025	1975803	1861375	2525824
	6197962	7019621	3574271	6286781	6178936	2470388		30900058	26257619	29597616	25325621	23662419		1804085	1614325	2018678	1880786	2583613
	6560145	7261040	3787955	6451505	6222950	2496101		31795662	27418303	30779144	26075249	24644438		1890988	1627744	2026378	1926980	2596746
	6806467	7344456	3872367	6663557	6229298	2496938		32135340	27575831	31033026	26628442	25953831		1929548	1653645	2139624	1976665	2606891
	6833882	7433376	3925680	6906776	6253790	2526233		32779431	27802161	31151673	26731329	26867274		1982135	1656478	2179568	1978266	2662222
	6896661	7558676	4025055	6931132	6290251	2555512		32885366	27999812	32090824	26820410	27582512		1992172	1669515	2217625	2094782	2816440
	6932999	7599887	4044417	6977292	7134252	2703126		33250792	28242330	32356643	27371639	28156958		1993182	1717848	2269080	2111359	2855837
	7113354	7761475	4068962	7058746	7151737	2834987		33849740	28599256	32960538	28036591	28209341		2009785	1718055	2293331	2126577	2900090
	7206478	7807633	4112856	7259990	7252749	2854325		34291810	29261801	33119794	28210754	28463002		2010175	1756806	2308331	2128057	2909959
	7211072	7822774	4213162	8049431	8207230	2866421		34671494	29367191	33922125	28607997	28680762		2013076	1759035	2310874	2148287	2923062
	7277624	7906863	4388389	8076410	8464445	2905040		34798765	29485625	34074023	29416369	28959924		2019513	1775926	2342515	2182920	2973293
	7472502	8110292	4390322	8164090	8567182	2905333		35168835	29758242	34470627	29655203	29613602		2026184	1778286	2352530	2210833	3006320
	7525980	8245174	4395458	8167284	8924340	2919393		35356238	29895048	34731060	29670128	29638271		2032948	1804460	2359059	2225929	3009262
	7627383	8445956	4396916	8262172	8956315	2938844		35359799	29986644	35594679	29811653	29989708		2034756	1823103	2398898	2237410	3023385
	8031634	8495550	4422404	8321577	8992149	2968889		35893819	30056046	35659287	29926353	30277114		2047559	1831448	2425991	2270074	3261335
	8122078	8562261	4557804	8412740	9294389	2974005		36180764	30065361	35818733	30047611	30966343		2052923	1832637	2450096	2276494	3263886
	8328899	8649035	4575241	8487649	9329474	2989232		36593912	30196133	35820010	30054658	30971398		2063990	1832964	2552889	2284212	3265514
	8332663	8698194	4884314	8590720	9664481	2998734		36773427	30288077	35837678	30137476	31132597		2083256	1852310	2589035	2298687	3272497
	8404713	8830420	4885563	8604706	9758027	3024987		37509556	30813646	36066361	30274607	31172727		2117898	1881112	2590747	2322165	3273657
	8446475	8975823	4989390	8753668	10057942	3031652		37558912	31124164	36135906	30463423	31174137		2167100	1886012	2604289	2327239	3338792
	8576657	9075705	5030975	8803658	10244644	3120648		37587887	31229077	36708075	30491715	31258425		2233260	1919081	2626219	2328818	3398699
	8710988	9076952	5111451	8916814	10448961	3195303		38076832	31722936	37003382	30796722	31464823		2244306	1921167	2639615	2377639	3447903
	8790638	9203291	5177844	9643108	10664944	3406250		38264830	31881896	37171366	30980243	31659703		2251891	1992219	2651491	2388101	3468493
	8851589	9358857	5234171	9682285	10686204	3473154		38613490	32065550	37495020	31081631	32720772		2271380	2043906	2651782	2390464	3485460
	8871079	9362353	5369951	9697386	10748859	3523545		38941625	32324424	37746823	31294932	32837142		2295720	2082298	2700695	2426807	3512427
	9420962	9534963	5444872	9774889	10813557	3587352		39011910	33388835	38274978	31701579	33344281		2317605	2110514	2755189	2439426	3573469
	9505719	9541312	5518707	9790357	10917515	3616751		39873076	33484554	38543318	31735949	33456113		2350579	2155537	2781691	2440813	3593032
	9518931	9546068	5518877	9936662	10936708	3635594		39880589	33744366	38935670	32524420	33654779		2362728	2161531	2827396	2449031	3595361
	9627536	9607766	5554849	9977425	11061988	3658922		40175362	33864450	39481396	32650278	33816777		2382796	2166554	2881675	2449153	3657416
	9649775	9656204	5687913	10041864	11154004	3698719		40184057	34031206	39891485	32812559	34114916		2415515	2253802	2884486	2457465	3672236
	9706630	9770555	5723344	10151494	11198958	3739797		40244028	34451726	39977773	32876160	34148564		2451577	2257240	2912477	2510272	3811449
	9760501	9868280	5759948	10249493	11232307	3749269		40390609	34587871	40009912	33504451	34631383		2452281	2277313	2975426	2543773	3841876
	9777650	9907649	5798745	10301065	11298675	3779345		40536615	34621236	40259718	33666331	34653571		2458193	2339246	2989385	2552060	3857172
	10052291	9930562	5825133	10378006	11387701	3781431		40625037	34967347	40926894	33738667	35040522		2459581	2445617	3005823	2565596	3866151
	10141097	9931664	5843580	10429839	11510088	3795682		40678184	35096481	41220013	34276731	35268847		2463803	2475265	3060940	2616152	3869270
	10225003	10024818	5866309	10479974	11729454	3810689		40740913	35206525	41377315	34418787	35368164		2503103	2484548	3095325	2617152	3987295
	10381423	10047747	5883311	10803849	11949191	3824137		41424803	35324327	41438980	34698682	35742368		2522012	2486610	3166760	2682289	3998304
	10707447	10113060	5905146	10914098	12062842	3914530		41727729	35479593	41946152	34704639	36053811		2532000	2521163	3261877	2703693	4031308
	10782855	10250066	5943952	10973597	12080643	3955614		42119178	36025673	42153461	34724653	36106054		2532362	2698111	3465848	2709000	4081882
	11126422	10314718	6026436	10979916	12289405	4071579		42214079	36176000	42521700	34966754	36363901		2548674	2758054	3539547	2711050	4243737
	11257890	10336965	6061759	11053158	12492913	4139602		42341024	36287451	43035156	35228354	36443377		2564384	2762091	3958869	2741351	4267229
	11281834	10384224	6203339	11118905	12511116	4168443		42826556	36350312	43501406	35240692	37434121		2565305	2775662	4024888	2836033	4565277
	11298807	10773590	6226728	11282451	12822816	4174454		42882283	36539989	44084378	35250984	38059458		2581040	2800200	4065857	2926790	4696084
	11337059	10775289	6253308	11315562	12878387	4188800		42911758	37103225	44682908	36417145	38435292		2588245	2809199	4104634	3054534	4701176
	11433346	11000609	6257415	11394454	13224977	4204715		43049842	37550146	44939685	36566117	38753538		2607159	2827424	4166219	3074620	4707153
	11512565	11097134	6332218	11571612	13702448	4328951		43063200	37823789	45138128	36888203	39972772		2619283	2864465	4213837	3176053	4715000
	11694546	11111497	6368643	11660254	14079903	4377248		43117433	37939322	45576148	37444683	40228742		2644821	2896683	4293647	3261576	4730027
	11894733	11157565	6401900	11763457	14144457	4411020		43409863	37965115	45678254	37453594	40275195		2653914	2967757	4342256	3344187	4730338
	12051729	11157714	6484199	11815540	14522486	4422959		44394650	38444510	46810139	37516579	40711293		2700035	3026147	4360239	3431164	4780767
	12083499	11300411	6556794	11892583	14647613	4437417		44620560	38462782	47012343	37724833	41053093		2745480	3046806	4447071	3454683	4804148
	12382151	11326245	6611668	11958243	14850966	4485446		44675331	38500235	47133280	38758274	41743198		2745737	3056161	4487719	3464518	4900563
	12571437	11396894	6636069	12383675	15007355	4486055		45135015	38527809	47550526	38845515	42183372		2790116	3137031	4523401	3529086	5039850
	12572896	11689217	6667300	12647080	15225191	4559955		45282599	39284248	47738436	39374483	43810284		2801126	3201554	4634245	3562486	5066169
	12933723	11821247	6797650	12662002	15366160	4685556		45792565	39508089	48262480	39601577	44386218		2811714	3236060	4754344	3674699	5127817
	13082773	11992764	6877844	13128951	16685526	4699913		46091767	39897239	48569976	40073592	44976289		2817311	3398165	4804154	3685545	5303548
	13156793	12101340	6925005	13597383	17196276	4700006		46133836	40516509	51091444	40200944	45084714		2863236	3462791	4821258	3953639	5503969
	13506073	12305090	6966714	13770958	17832467	4709759		46143432	41752473	51560729	40643511	45092900		2871384	3515447	4897046	4283192	5889020
	13803896	12475994	7151898	14915253	19043747	4765654		46238917	41989452	51852950	41705389	45996026		2875690	3684471	5083273	4566122	5996976
	14145032	12532653	7226708	15263911	20276887	4816170		46664423	42782129	51867159	42374476	46265962		2879105	3710962	5087973	4646511	6085147
	14321789	12556550	7240261	15671560		4951485		46725940	43213564	52048520	42387733	46524294		2920383	3815461	5184169	4852071	6119248
	14833458	12567167	7451594	16514380		4965099		47415544	43213605	52750272	43695164	48554597		2960372	3838951	5187146	4990840	6588979
	15005202	12613528	7567098	17044447		4969942		47760299	45259112	53949408	44955982	48715331		3050795	3863004	5274375	5014691	6615274
	15072760	12744567	7682347	17583349		5005744		48102555	45915358	56932777	45169794	50177856		3133063	3945122	5284785	5037675	6685451
	15077389	12844196	7757068			5032726		48272374	46232752	57231603	47241393	51154350		3194419	3961893	5311271	5054754	6848765
	15266291	12852379	7761948			5050839		49047005	46534227	59985354	47453340	55441092		3233861	4094286	5359580	5082470	6947325
	15372718	12924010	7782648			5129275		50079348	46693433	60567304	47833314	57055500		3238536	4099476	5417395	5132374	7104107
	15440507	12987388	7809720			5204553		50118622	47368735	60632011	48086435	57868220		3366959	4109537	5979324	5278157
	15919550	13010693	7888681			5310051		51175049	48488227	60840846	48977785	58058584		3487913	4125255	5988377	5322449
	15920211	13114480	7980829			5359287		51219360	49467063	62432690	49379869			3594136	4156829	6027647	5328590
	15943457	13368348	8009262			5376742		51990361	49922568	62720242	51842108			3594495	4194562	6368983	5355712
	16511902	13457049	8295469			5389202		52187686	50410185	65309274	52009013			3596685	4234769	6402432	5416951
	16760626	13486169	8316379			5460735		53194921	50810544	65661573	52213470			3722133	4238183		5432981
	17134492	13561154	8814223			5501360		53343844	51372265		53001000			3746751	4280644		5435822
	17461945	13581566	8898865			5554781		53432937	51575222		54361710			3890013	4318165		5617419
	17529236	13844187	9145449			5615289		53606845	52133221		54874618			3921246	4331472		5658554
	17683878	14063577	9172594			5653825		54621847	52269863		62166346			3986416	4380830		5711507
	18042378	14124271	9308242			5753243		54956779	52404914		62221537			4206149	4397543		5711917
	18382340	14193239	9881485			5868212		55867640	52751701		63392957			4268968	4549085		5824678
	18492980	14800460	10285679			5913479		57466268	53976500		65670980			4337351	4558849		5882612
	19023701	14918087	10347818			5998601		57952539	55059829		67655978			4337948	4601080		6205290
	19047461	15275325	10698484			6162052		59325289	55885371		68039900			4399259	4602518		6226352
	19222884	15337002	10699894			6392703		59741339	56004439					4587800	4654772		6758296
	19339751	15463386	10981823			6529095		61421654	57214939					4641937	4852619
	19518988	15649734	11154909			6606625		61459150	57470324					4665875	4855953
	19658180	15693227	11354812			6639908		61863289	57711233					4706176	4905740
	19797169	15696993	11484661			6763052		62601373	57873543					4911652	4917396
	20310999	15809677	12346861			7104114		63151935	58449532					5042096	5034410
	20524438	16120326	12658271			7130304		63241319	58491019					5075622	5167165
	20739055	16528319	13014776			7470976		63636678	59620473					5086951	5198626
	21289360	16629712	13657595			8153012		69345479	60333493					5207755	5244454
	21940008	17670882	14687176			9604241		69499457	61757640					5221611	5259414
	22066399	17697385				9621112		69977556	65113867					5495355	5322657
	22130361	18176892						72244321	65120585					5595599	5349916
	22715966							77757896	65379956					5731914	5518908
								80925796	65680420					6089754	5648533
								85884398	66762426					7239370	5708676
								87577646	67192556					7832103	5841477
									68248819						6196544
									69183341						6350018
									69947290						6389808
									69975675						6719866
									72340394						6788738
									72932574						6806747
									75357782						7353517
Moyenne	1.53361e+07	1.38517e+07	1.03227e+07	1.19264e+07	1.45477e+07	5.12686e+06		4.34749e+07	4.20684e+07	3.63858e+07	3.79589e+07	3.26091e+07		7.39528e+06	8.04839e+06	7.47274e+06	7.64599e+06	6.76338e+06
SD	5.60062e+06	5.11807e+06	5.10213e+06	4.62578e+06	6.03841e+06	2.25315e+06		1.30155e+07	1.15929e+07	1.06654e+07	1.17334e+07	9.40084e+06		4.96249e+06	6.04625e+06	4.15577e+06	4.62242e+06	3.29136e+06
SEM	366124	306411	320768	399606	465873	201528		807188	714847	662716	723514	689303		310155	373538	258227	284490	243971
Par rapport à NoUV
Moyenne	100	90.3211	67.3096	77.7671	94.8593	33.43		100	96.7648	83.6938	87.3123	75.0068		100	108.831	101.047	103.39	91.4554
SD	36.5193	33.3728	33.2688	30.1627	39.3739	14.6919		29.938	26.6657	24.5323	26.989	21.6236		67.1035	81.7582	56.1949	62.505	44.5062
SEM	2.38734	1.99797	2.09159	2.60566	3.03776	1.31408		1.85668	1.64428	1.52436	1.66421	1.58552		4.19397	5.05104	3.49178	3.84692	3.29902
variance	3.12329e+13	2.61008e+13	2.59288e+13	2.12381e+13	3.62453e+13	5.03609e+12		1.68752e+14	1.33884e+14	1.13312e+14	1.3715e+14	8.79007e+13		2.45301e+13	3.64176e+13	1.72038e+13	2.12858e+13	1.07735e+13
t.test égale		0.00182505	9.05875e-23	5.44902e-09	0.178714	2.36664e-58			0.192358	3.18272e-11	4.96881e-07	2.33889e-20			0.180141	0.847711	0.551197	0.13457
t.test inégale		0.00198877	1.42354e-22	1.03122e-09	0.184225	1.33241e-76			0.192661	3.24402e-11	5.06645e-07	3.19705e-22			0.179175	0.847868	0.551635	0.110035

## Sheet: Moyenne par rapport à NoUV
	PLA							IF XAB2						IF CSA
	No UV	1h	2h	4h	16h	XAB2-GFP		NoUV	1h	2h	4h	16h		NoUV	1h	2h	4h	16h
	45.689	19.1376	8.32721			12.4674		41.2096	57.1803		49.0978	38.1152		44.7439	48.425	31.5773	41.0898	41.9483
	47.3831	22.9713	21.7084		41.5646	16.4931		42.2662	64.0929	41.961	51.1196	40.8128		46.3715	53.52	50.9768	47.3443	49.6461
	50.4036	32.4483	38.3946		46.7778	24.2014		42.9045	66.5144	43.6127	54.4457	42.8994		46.8957	56.1942	52.3819	49.1528	57.1218
	56.4339	33.1306	38.8325		53.8505	25.2185		45.0572	66.6882	46.3065	55.5343	43.7507		47.2947	56.5904	59.6325	49.2248	58.5459
	56.9161	35.0589	42.249		53.9173	38.4911		48.7344	67.4657	47.2353	56.2191	44.7826		47.8372	59.7106	59.6674	54.1069	59.7331
	57.9347	39.8915	42.836		54.262	41.503		56.8418	67.8306	48.2748	57.7577	46.0693		52.7091	60.1254	60.544	54.1577	62.6777
	68.2937	41.5408	44.4557		54.7412	42.3136		61.0459	68.1502	48.9442	57.9834	49.1307		52.9799	60.9981	62.3025	57.5035	63.4238
	68.8785	42.5965	46.4612		55.2048	44.2006		64.0985	69.1045	50.8452	58.1223	49.316		53.2867	61.676	63.8874	58.848	63.698
	69.0232	45.5476	46.8468		57.4004	44.552		65.5827	69.2767	51.1125	59.7169	50.1817		53.8123	62.5695	64.4765	67.2161	63.8286
	70.0288	48.1585	47.1688		58.6225	46.6386		66.2416	69.324	51.6565	59.9115	51.3232		55.7684	63.271	67.5497	67.6736	64.9419
	70.172	48.5331	47.5228		60.8518	47.9665		68.617	69.5555	53.4484	60.2792	53.1601		57.2979	64.1999	68.8619	68.8164	65.4564
	71.5674	48.6084	48.37		63.5629	48.2918		69.385	69.9753	54.553	61.0467	54.6706		57.8365	66.9909	72.3066	68.8821	65.6591
	71.9056	49.0141	50.6645		64.4679	49.6581		70.6911	70.5489	55.1603	61.8221	58.1381		58.8672	67.8442	73.019	70.5831	67.6281
	73.6398	49.5322	51.3864		66.4556	49.9338		71.7919	71.0765	56.8348	62.6058	58.6608		61.0045	68.2826	73.3569	72.6431	70.602
	73.8159	53.3815	51.8235		71.0627	52.6788		72.464	71.1202	56.9142	63.323	58.8901		61.2173	68.595	73.4822	73.9533	73.3007
	76.8367	54.7097	52.79		71.4607	52.7396		73.0719	71.2305	57.0982	65.9057	60.6572		61.2507	69.1704	74.5177	74.532	73.7285
	76.9316	55.7135	53.2014		71.6877	53.1083		73.5131	71.4632	57.1655	66.6563	61.1664		64.4563	69.9044	74.6909	74.6476	73.7319
	77.4498	56.3845	56.2097		72.3422	53.8634		76.9039	72.4357	57.6606	67.1274	61.2823		65.613	70.0731	75.357	75.0393	73.7566
	77.9728	59.1462	56.7084		73.5731	55.3834		76.9108	73.3228	57.769	67.1947	61.9878		66.1017	70.1639	76.6262	75.2758	73.9644
	78.0541	59.1914	56.9882		75.71	56.2352		76.9266	73.3494	58.4973	67.5683	62.1645		67.5764	70.4521	78.118	76.6093	76.2629
	78.6088	59.6122	57.4328		77.9046	57.1754		77.517	73.5111	60.0291	67.7611	62.2892		67.7109	70.9799	78.2852	77.4904	81.4572
	79.0855	59.9693	58.2967		78.3528	57.7793		77.8328	73.9925	60.2743	69.1577	62.7644		69.209	71.7867	79.4715	78.1846	82.5768
	79.6596	59.9972	58.3613		78.6465	60.2954		79.9808	75.7065	60.7048	69.424	66.807		70.7002	71.9601	80.7775	79.5038	82.6023
	80.8902	60.6489	59.5164		80.2044	60.4523		80.2417	75.728	64.0295	70.781	66.8919		71.6662	73.2004	81.9004	81.2353	82.87
	83.385	62.0187	61.3713		80.8703	62.0059		81.0906	76.0215	64.8762	71.0571	67.2919		71.8244	73.7722	82.8124	83.7067	83.3814
	84.6546	63.9576	63.7295		81.4688	66.0224		81.3205	76.7619	65.3363	71.9661	68.5267		73.9401	73.8397	83.3082	86.4353	83.5476
	86.4561	64.1466	66.0403		81.5352	66.1115		81.3855	78.0741	65.7562	72.4418	68.9234		75.0115	73.9732	83.3684	88.801	83.8746
	86.5342	64.6201	66.2745		82.9297	66.6596		82.6796	78.1661	65.8831	72.5316	69.1792		75.1464	75.2792	83.4397	89.7748	85.6551
	87.0771	65.0924	66.5461		86.3542	66.9049		84.0228	78.405	65.9662	72.6643	69.3594		80.274	76.0258	84.3211	91.1042	89.5113
	87.0847	66.4425	66.6744		87.2991	67.0902		84.9293	78.686	68.3411	73.5276	69.4313		80.5097	76.579	84.7317	91.7984	90.5386
	89.2235	66.8479	66.7215		88.0163	67.7162		87.108	79.0134	68.3625	74.9385	70.0224		80.604	76.9813	86.4818	92.729	91.6082
	89.8866	74.2226	67.9022		88.7054	68.7242		88.5059	80.048	68.685	76.882	70.1428		82.0159	77.2763	89.0456	94.5269	91.6313
	90.3307	74.4047	68.3402		91.0229	69.1178		89.4675	81.1333	69.4812	76.9512	70.7173		82.3309	77.389	89.1702	95.5539	91.8572
	90.7774	77.5634	68.6121		93.2681	69.2777		90.1583	82.1363	70.7977	77.4486	70.9875		83.3669	77.6388	89.2987	97.7186	92.1155
	90.8301	78.2225	68.9236		94.8933	69.4626		90.3064	82.5438	71.216	77.6597	71.1824		86.5118	78.0341	89.3451	99.8406	93.8117
	91.5012	78.4217	69.2131		97.5502	70.2755		90.6235	82.5616	71.5691	78.4667	72.6449		88.8546	78.205	89.3883	100.814	94.9323
	92.8144	78.6867	69.3401		98.8481	70.2829		90.977	82.9821	72.2835	79.1825	72.9274		92.4397	78.9025	89.671	101.264	96.5129
	94.4198	79.7488	69.7971		99.8585	70.7688		95.2422	83.0097	72.4733	81.3399	73.1424		92.9945	80.4013	92.1345	103.45	97.0886
	94.7161	80.5577	70.1152		101.11	70.8776		96.0685	85.5893	74.1712	82.2234	75.6824		93.5228	80.7867	92.3521	108.375	99.6656
	94.755	81.0719	70.9012		102.32	71.7656		98.8102	86.0679	74.8391	84.3084	77.8772		98.3911	80.7971	93.8175	108.712	101.646
	95.1627	81.1253	71.5504		106.956	72.6196		98.8406	86.1252	75.177	84.5445	78.1741		99.1431	80.9838	94.4193	110.136	102.434
	96.0582	81.128	71.68		110.036	72.8627		99.3997	86.3491	75.1784	85.3327	78.2294		101.238	81.85	94.4319	116.178	102.464
	96.2241	81.3858	71.9412		112.541	73.3973		101.187	86.5832	75.2668	90.595	79.348		102.232	82.7313	94.8933	117.094	102.656
	96.4113	81.7737	72.2683		113.554	73.933		102.138	87.7023	76.4836	91.2218	79.7924		104.96	83.266	95.6899	117.627	103.247
	97.3723	83.5302	72.4554		115.448	74.0714		102.841	87.737	76.6047	92.3396	80.1492		107.819	85.4	97.9564	117.903	103.324
	97.6675	83.6806	72.4949		116.061	75.5015		103.049	87.7425	78.093	94.4883	80.8918		111.363	85.5349	103.359	119.178	103.833
	98.1202	84.0083	74.6063		116.606	75.9558		103.283	87.8086	78.2004	95.1485	81.7874		112.263	85.5596	111.158	122.037	105.429
	99.3124	84.4699	76.2187		122.816	76.781		103.914	87.8885	78.5533	95.3682	81.8117		113.588	85.9739	112.69	124.272	107.081
	100.471	85.017	77.6061		126.197	76.8732		106.128	88.0826	79.1308	95.417	82.8184		114.207	86.5694	116.238	125.755	110.528
	100.474	85.0296	77.696		128.728	78.1422		108.931	88.4665	80.1729	95.6919	83.1069		116.645	87.0597	117.013	126.111	115.64
	102.442	85.4506	78.6464		130.392	78.457		112.254	88.543	80.5491	96.313	83.1699		116.935	88.0275	117.761	129.247	123.158
	102.916	86.7239	78.8168		133.695			115.814	88.6286	80.9449	98.6573	83.5313		119.114	89.1471	117.808	129.862	126.261
	103.555	87.5971	79.5632		135.302			119.43	88.9561	81.1205	98.9235	89.31		119.333	90.3363	122.369	129.933	131.177
	106.033	88.3083	80.2783		139.104			119.566	89.8966	81.9947	99.0659	92.4819		119.924	90.6993	123.614	135.697	132.398
	106.044	88.4669	80.5938		143.411			120.611	90.3846	82.5403	99.1455	93.1631		123.83	91.3498	124.016	137.008	135.072
	109.504	88.5227	80.6362		143.847			120.729	91.46	83.7758	99.2061	94.3624		126.559	95.2835	125.885	141.543	137.628
	110.608	88.7601	81.4927		150.762			122.036	91.5787	84.3911	99.3844	94.6293		127.149	95.964	129.711	145.061	137.706
	111.822	88.8888	81.6444		164.056			122.694	91.7634	86.2195	102.126	95.9615		128.379	97.0864	131.861	148.212	140.579
	112.418	89.1231	81.8637					124.153	92.0379	86.3659	102.713	96.3385		129.011	98.3496	132.502	148.867	141.803
	113.61	89.7797	81.9887					124.491	92.2092	86.5121	102.822	98.0695		132.554	99.3366	133.256	154.104	143.668
	113.824	90.2028	82.5522					126.253	92.2204	87.0673	102.832	101.188		132.894	99.9941	135.74	157.203	149.565
	113.86	90.2033	82.708					126.878	92.7085	87.2029	107.237	102.831		146.195	101.116	136.497	161.636	155.02
	114.892	92.7228	82.7123					127.312	93.152	88.8969	107.299	103.462		147.355	101.673	136.649	164.527	158.397
	120.049	93.4704	88.3872					129.207	93.3244	89.7335	108.089	104.913		150.636	102.741	138.115	173.533	158.579
	120.225	93.9506	88.8301					130.131	95.7841	91.3214	111.439	114.251		154.456	103.137	138.307	176.486	162.908
	122.113	95.1712	88.9059					130.781	96.6935	91.5587	112.415	114.298		155.452	103.38	138.551	179.879	171.208
	122.328	95.2226	92.5642					132.741	97.9831	91.6532	113.948	116.137		158.606	109.735	144.484	181.081	171.857
	124.259	96.0242	94.1911					133.006	98.5572	92.8976	114.792			158.956	109.834	147.404	185.712	181.168
	124.475	96.4659	95.6899					133.622	99.7385	94.0955	118.917			160.703	110.949	147.433	185.794	185.422
	125.392	97.3268	98.5983					136.178	100.609	94.4689	119.16			162.569	111.233	147.964	186.627	191.463
	127.168	101.444	99.6089					138.84	100.738	94.5406	120.962			172.194	111.781	155.719	188.012	207.195
	129.192	101.466	99.7164					141.916	100.948	95.8656	121.018			175.051	111.79	155.815	193.765
	132.041	102.583	100.006					145.061	101.772	96.5853	122.569			184.097	113.37	159.572	194.057
	137.143	102.665	100.922					145.163	104.608	99.0771	123.587			185.79	113.768	160.849	194.299
	138.091	103.108	103.554					147.974	104.971	100.348	124.238			188.855	115.097	162.328	196.323
	139.313	104.623	104.665					155.649	105.205	101.442	125.193				116.296	162.628	197.368
	139.491	105.576	104.988					162.93	106.278	103.801	129.671				118.354	165.461	197.82
	140.698	105.758	105.594					165.612	107.007	106.711	130.239				122.772	173.157	198.009
	149.362	105.831	109.093					166.732	107.759	107.915	130.307				125.243	173.702	199.089
	150.449	106.554	110.866						108.244	108	131.112				126.482	175.161	201.132
	159.427	106.637	111.299						109.755	110.358	131.162				128.31	186.859	201.557
	168.065	108.313	112.931						110.294	112.192	131.257				130.969	200.885	205.982
	169.504	109.992	113.085						113.795	113.217	132.305				132.593	205.429	210.538
	170.392	112.629	113.738						117.712	115.505	132.841				135.124	207.792	214.82
		116.841	114.403						120.511	120.508	134.82				135.968	209.535	216.094
		119.597	119.435						121.708	120.626	141.513				137.261	210.989	217.886
		123.286	120.389						121.917	121.439	142.085				140.468	216.102	222.216
		124.539	120.928						122.94	125.955	146.447				144.252	216.325	223.333
		128.189	121.127						123.336	126.62	151.237				147.008	232.058	223.595
		136.167	124.195						126.144	127.58	151.736				152.157	234.11	240.215
			146.809						127.427	128.945	155.87				153.446	245.68	247.916
			148.7						127.468	132.685	156.695				153.687	245.876	248.351
									130.45	136.982					155.348	251.289
									132.046						159.714
									138.771						162.524
									139.447						172.185
									140.347						179.209
									140.479						181.102
									144.686						184.423
									145.635						194.922
									150.093
	49.9302	23.3518	29.1413		32.9183	38.68		56.4751	60.1668	47.7319	50.3352	27.0587		44.145		32.722	31.9727	28.1867
	52.7346	25.5702	30.7879	34.9061	33.3861	50.9947		57.6049	66.9566	49.1456	54.7455	32.8874		46.2887	81.8143	33.103	35.6297	39.4301
	56.7613	27.549	30.7951	40.9357	34.8177	51.7246		60.1305	67.1771	52.3918	55.0144	36.0989		51.8596	83.2862	33.4994	37.9367	41.3705
	65.5011	30.07	33.3017	41.3223	58.2303	55.4036		67.1586	75.579	53.3737	55.4403	37.1723		58.5226	86.7047	33.913	38.21	42.1794
	66.3284	42.427	33.5343	41.7413	61.3838	57.7887		67.4437	75.9873	53.7015	55.6499	39.8347		58.9734	90.2127	33.9695	38.5829	43.2275
	66.9726	45.0318	33.7211	46.8565	62.9927	58.2401		69.5141	76.424	54.9851	57.4901	39.9688		59.0918	93.9895	38.7916	39.3724	46.6811
	67.8446	46.0501	34.5263	52.0632	66.3721	58.2921		70.4944	78.1845	55.5193	58.6535	45.1489		59.7202	94.5312	40.1287	39.4744	47.4885
	70.3932	47.0997	35.478	54.4751	67.4735	58.7973		72.7853	80.1132	56.4359	59.9193	52.1275		61.4561	96.2216	40.3637	39.6536	52.4174
	73.0106	50.1577	37.1531	55.0999	70.0122	59.038		76.9509	83.8818	57.0173	60.3784	53.4934		64.9415	96.5335	42.448	40.2925	52.4356
	77.0684	50.3514	37.3923	55.8244	70.02	60.6705		77.0546	84.6158	57.2606	62.7141	53.5348		67.8604	98.0426	43.0135	40.5137	53.1529
	77.2117	52.682	37.5995	56.5298	70.6794	65.6661		78.0941	85.4486	57.9109	64.7352	56.5356		68.4043	98.6565	43.1571	41.075	54.948
	79.5732	56.4145	39.809	56.6895	72.6863	65.9702		80.101	86.0058	63.8299	65.0648	59.0539		69.053	100.089	43.5917	41.2901	56.3226
	87.3459	56.6677	42.5992	56.9136	73.9528	67.0413		81.8548	87.0799	64.3754	66.0804	62.0219		73.1052	101.021	44.992	42.3966	56.6299
	88.2794	58.5249	42.6415	59.146	76.6188	67.4203		83.2073	87.7552	64.4211	66.926	62.8604		73.4779	103.988	45.5418	42.5612	56.6306
	88.3769	58.8807	43.2939	60.1534	78.603	67.6398		83.5715	90.0233	64.5525	67.2374	64.3914		73.8692	104.35	47.0322	42.6063	60.4995
	88.9828	59.8792	43.5201	60.4329	83.0146	67.863		83.6771	90.8634	65.6246	67.3919	64.8632		74.1634	106.634	47.2022	43.92	65.0897
	89.4663	61.5454	45.4201	63.7454	86.3914	70.9001		83.9039	92.4086	65.8342	70.0189	65.2706		75.9971	107.42	47.7622	44.6072	65.6366
	89.8494	61.7944	46.2397	65.5574	86.9253	71.2115		84.4384	94.8369	68.4191	70.071	67.7248		76.3062	112.244	48.782	45.556	65.8528
	91.7337	64.955	46.7056	65.9022	87.1131	71.2182		84.8866	95.8509	68.7854	70.0717	72.409		76.9057	118.887	49.0479	45.6118	65.8998
	92.3034	65.4503	47.6584	68.0009	88.3191	72.2202		84.9916	96.1309	68.8751	70.3358	72.6083		76.9938	121.819	49.7898	45.8428	66.6093
	94.056	69.9993	48.0952	68.2444	92.2564	72.2794		85.5305	96.8546	70.2567	71.198	72.8791		78.2129	124.971	49.8812	46.4575	68.4949
	95.8946	72.4295	48.5143	71.3589	95.5523	74.0348		85.9117	96.8714	71.0343	71.4112	75.2759		78.37	129.652	51.0117	47.1222	69.1784
	96.077	72.4458	49.3116	73.3771	96.8735	74.0753		86.0057	98.4378	71.4994	71.6968	76.2742		78.4119	133.997	52.0115	47.1357	70.4611
	96.5636	74.7823	49.6878	76.5999	100.982	74.6884		87.7105	98.537	72.2445	72.5837	76.3997		78.6297	134.961	52.0158	47.8746	71.805
	97.4845	76.1535	51.3554	77.5819	112.91	74.8647		87.7281	99.5621	72.98	73.6747	77.8458		78.7993	139.801	52.2431	48.3311	73.6441
	101.03	77.9133	53.2601	77.8174	113.715	74.9654		88.9723	102.9	73.1095	75.3677	78.9592		79.2928	142.471	52.3758	48.9421	73.7886
	104.213	78.7075	53.5205	78.3155	115.082	78.1475		89.8937	103.568	73.3487	75.944	80.3344		79.3204	147.332	52.7822	49.4871	75.2177
	106.142	79.1282	54.2742	78.7895	115.093	78.3571		90.6333	104.476	73.5124	75.9893	80.4037		80.1012	148.492	53.1231	49.676	75.6972
	106.495	79.8117	55.8001	79.0838	116.973	79.0231		90.7084	106.004	74.2197	76.4311	80.8771		80.7162	149.664	54.2718	49.8475	78.5089
	106.841	80.8778	58.6363	79.9075	119.199			90.9828	106.657	74.889	77.1424	82.7749		82.6792	149.819	54.375	52.4485	81.2103
	107.599	85.184	59.4971	85.1636	129.6			91.3629	110.285	75.7119	77.3748	83.029		82.8403	155.38	54.5842	52.6885	83.822
	108.102	85.6731	60.5133	85.5689	130.333			91.6292	116.503	76.1791	77.4773	83.5278		84.0763	156.979	55.962	57.6732	83.9671
	108.522	87.6271	61.3612	86.018	131.644			91.861	116.976	76.4185	81.3292	84.5588		85.6937	161.98	56.7272	59.2638	89.3293
	108.63	88.3431	61.558	87.361	134.158			92.5641	118.357	76.9061	81.8064	86.3096		85.8923	164.402	57.0887	59.6853	89.7933
	109.802	91.5524	64.7346	87.6084	136.04			92.8672	119.959	77.2629	82.0388	87.009		87.5809	166.846	57.2103	59.7894	92.1684
	110.957	92.8813	64.7578	90.3931	140.033			93.5095	122.383	77.3542	82.8566	87.8986		88.8084	167.246	57.2585	59.869	93.4601
	112.909	93.282	66.5385	91.0227	140.912			93.8942	124.682	77.7858	84.8438	88.1263		89.1769	176.273	58.168	62.8662	107.745
	113.254	93.758	66.8441	91.8751	147.182			96.1214	125.717	78.0248	85.6972	88.8052		89.6105	178.024	58.213	63.9488	121.185
	118.733	96.0515	68.7383	94.0952	150.6			96.1675	128.019	78.4085	86.2933	91.5445		90.1338	179.615	58.5289	64.709	124.326
	120.226	96.4338	68.8327	94.3644	151.971			96.9879	129.358	79.7213	86.876	92.8671		90.759	180.178	60.3506	66.7777
	121.294	96.717	69.9782	94.681	162.07			98.6909	130.294	79.7288	87.17	106.528		91.0036	180.6	60.5413	68.0168
	122.037	98.9052	70.1189	95.398	170.353			99.1463	133.694	79.7358	88.6909	109.98		91.1523	187.728	62.1936	68.3613
	124.346	99.2861	71.8453	97.4603	170.805			99.5524	135.244	80.0524	89.1742	111.869		91.4896	189.398	62.2013	68.6038
	126.076	100.442	74.4691	98.4028	170.818			100.974	136.22	80.3899	89.3089	112.039		91.4974	189.811	62.8539	68.8874
	126.434	101.579	75.5945	98.8879	204.299			102.297	136.881	80.4163	89.5583	114.97		91.9782	191.974	63.0188	70.7531
	126.966	101.695	76.0073	101.33	204.996			103.381	137.789	80.6596	89.5593			92.2437	192.129	63.1262	71.1817
	133.546	102.305	76.7559	101.875				105.873	142.12	81.0113	91.2577			93.8315	192.637	63.5698	71.7159
	143.603	102.918	78.0171	101.952				106.216	145.932	82.0759	91.4386			96.2888	196.274	64.4136	72.3818
	156.784	103.568	79.7655	110.352				106.588	148.495	83.1339	92.5648			97.5923		65.4814	72.4139
	175.718	104.183	80.3109	112.102				106.761	152.492	83.3971	92.6027			97.7021		65.762	73.4738
		105.653	80.4812	119.435				106.957	159.732	83.4825	92.6125			99.1832		66.9765	75.3815
		106.684	81.5719	119.923				107.261	176.068	84.0956	93.575			99.9916		67.2048	79.6709
		107.028	82.1552	123.312				107.321		84.1322	93.9137			102.192		67.6351	79.782
		107.41	82.9029	125.148				108.301		84.3919	94.5222			103.852		67.7783	80.4289
		117.534	84.9331	127.613				108.421		84.4191	96.5041			105.785		68.0205	80.8256
		118.643	87.5029	128.728				110.101		84.5197	96.762			106.481		68.8242	81.6249
		120.161	88.7091	130.853				111.731		84.8353	97.9122			110.577		69	81.933
		120.662	88.7925	131.928				113.806		84.9782	98.1825			116.877		69.3781	83.0778
		121.716	89.0658	132.416				113.896		85.6254	98.5925			117.295		69.4731	83.4194
		123.105	93.0847	132.587				116.039		85.8759	98.8895			119.112		69.8104	84.4881
		123.494	98.5713	134.284				116.115		86.3532	99.8089			124.717		71.1632	85.1317
		123.962	112.181	136.921				119.41		86.8851	101.123			129.793		71.4934	87.3377
		125.246	117.436	139.051				120.581		87.9258	101.889			130.537		71.6003	88.1249
		125.574	118.745	153.811				122.158		87.9761	103.545			131.344		72.0769	88.7432
		127.689		165.985				123.37		89.1085	103.796			134.783		72.3996	88.7533
		128.479		193.43				124.306		89.4184	104.289			141.586		76.5081	89.8215
		129.397						125.551		90.2156	107.693			142.54		80.271	93.3061
		129.52						131.453		91.8281	107.755			142.715		81.3731	93.6947
		132.401						138.66		92.0045	110.28			148.697		82.019	97.8842
		132.823						139.556		92.6309	112.728			152.889		82.4453	98.2005
		134.74						142.198		94.6366	113.098			153.572		83.5525	99.1014
		135.547						146.744		95.8694	116.354			156.489		88.2788	99.9672
		135.727						159.321		96.8283	116.903			165.244		88.6512	102.327
		137.22						164.058		97.4002	119.546			182.676		89.7078	102.994
		138.145						167.825		97.9436	123.054			182.95		91.8309	104.581
		138.55								98.6807	124.81			185.789		93.0018	110.463
		138.559								104.054	126.075			188.935		93.7989	111.178
		141.6								105.444	128.73			208.378		94.5696	112.763
		142.026								110.325	130.956					99.2939	113.339
		146.079								111.123	133.887					104.325	113.386
		150.555								115.223	135.652					104.974	114.973
		154.02								125.892	144.888					110.387	116.327
		158.608								128.7	145.723					115.297	118.441
		159.977								132.327	159.56					116.818	123.274
		165.558								136.136						119.412
		165.732								137.93						120.881
		177.061								138.136						121.798
		181.309								149.722						128.362
		188.578								165.163						130.582
		191.168
	36.1568	39.7136	18.0138	31.9015	31.424	10.5398		50.0475	55.7203	47.3245		40.8449		48.7623	45.5206	43.2488	49.7394	70.772
	36.6835	44.6502	21.8746	34.9119	35.8513	12.4578		54.2247	56.1184	54.1828	50.0391	41.435		48.9735	45.6372	52.0776	51.364	71.7634
	37.054	49.6729	22.0282	37.9564	37.5429	14.5959		64.7717	56.3954	57.9659	53.163	44.7631		53.7371	46.2603	52.7173	53.2451	72.1037
	38.3379	53.4855	22.2982	43.0719	40.9344	15.7837		65.0013	56.7448	60.8008	55.1353	45.0081		57.3743	46.6973	60.2387	55.6364	75.7873
	45.9709	53.8822	25.6391	46.1102	42.9378	17.4339		66.9012	57.6878	63.6567	55.9221	46.5014		57.5935	47.2109	61.7921	58.6296	82.7141
	48.1436	54.307	28.2118	47.7092	47.0189	18.4842		69.8038	57.7032	65.9306	56.4566	46.7102		59.0765	49.9841	62.897	60.7828	84.1351
	48.6624	54.452	28.8133	48.0108	47.4558	19.6062		69.8935	59.0646	67.6782	56.7931	47.9746		59.9134	52.1722	66.1195	62.2902	84.5258
	50.021	56.6523	28.8464	50.7379	49.8675	19.9374		70.8907	60.2401	67.9027	58.1019	54.2862		60.373	54.0228	67.5543	62.9398	86.4596
	52.9441	58.6007	30.5709	52.0673	50.2227	20.1449		72.9454	62.9029	70.6133	59.8217	56.5391		63.2812	54.4718	67.812	64.4857	86.8991
	54.932	59.2739	31.2522	53.7787	50.2739	20.1517		73.7247	63.2643	71.1958	61.0908	59.5431		64.5716	55.3386	71.6017	66.1484	87.2386
	55.1533	59.9915	31.6824	55.7416	50.4716	20.3881		75.2024	63.7835	71.468	61.3268	61.6387		66.3314	55.4334	72.9384	66.2019	89.0903
	55.6599	61.0028	32.4845	55.9381	50.7659	20.6244		75.4454	64.237	73.6226	61.5312	63.2796		66.6673	55.8697	74.212	70.1011	94.2511
	55.9532	61.3354	32.6407	56.3107	57.5774	21.8157		76.2838	64.7934	74.2324	62.7958	64.5975		66.7011	57.4871	75.9339	70.6558	95.5695
	57.4088	62.6395	32.8388	56.9681	57.7185	22.8799		77.6579	65.6122	75.6179	64.3214	64.7177		67.2567	57.4941	76.7455	71.1651	97.0504
	58.1603	63.012	33.1931	58.5922	58.5338	23.036		78.6721	67.1322	75.9832	64.7209	65.2996		67.2698	58.7909	77.2474	71.2146	97.3807
	58.1974	63.1342	34.0026	64.9634	66.237	23.1336		79.5431	67.374	77.8239	65.6323	65.7992		67.3668	58.8654	77.3325	71.8916	97.8192
	58.7345	63.8128	35.4168	65.1812	68.3128	23.4453		79.8351	67.6457	78.1724	67.4868	66.4397		67.5822	59.4307	78.3914	73.0506	99.5001
	60.3073	65.4546	35.4324	65.8888	69.142	23.4477		80.6841	68.2712	79.0823	68.0348	67.9393		67.8055	59.5097	78.7265	73.9847	100.605
	60.7389	66.5432	35.4738	65.9146	72.0245	23.5611		81.1141	68.585	79.6798	68.069	67.9959		68.0318	60.3856	78.945	74.4899	100.704
	61.5573	68.1636	35.4856	66.6804	72.2825	23.7181		81.1222	68.7952	81.6611	68.3937	68.8022		68.0923	61.0095	80.2782	74.8741	101.176
	64.8198	68.5639	35.6913	67.1598	72.5717	23.9606		82.3474	68.9544	81.8093	68.6568	69.4616		68.5208	61.2887	81.1849	75.9672	109.139
	65.5497	69.1023	36.784	67.8956	75.011	24.0019		83.0057	68.9758	82.1751	68.935	71.0428		68.7003	61.3285	81.9915	76.182	109.225
	67.2189	69.8026	36.9248	68.5001	75.2941	24.1248		83.9535	69.2758	82.178	68.9512	71.0544		69.0707	61.3395	85.4315	76.4403	109.279
	67.2493	70.1993	39.4192	69.3319	77.9978	24.2015		84.3654	69.4867	82.2186	69.1412	71.4242		69.7154	61.9869	86.6411	76.9247	109.513
	67.8308	71.2665	39.4292	69.4448	78.7528	24.4133		86.0542	70.6925	82.7432	69.4558	71.5163		70.8747	62.9507	86.6984	77.7104	109.552
	68.1678	72.4399	40.2672	70.647	81.1733	24.4671		86.1674	71.4049	82.9028	69.889	71.5195		72.5212	63.1147	87.1516	77.8802	111.731
	69.2185	73.2461	40.6028	71.0505	82.68	25.1854		86.2339	71.6455	84.2154	69.9539	71.7129		74.7352	64.2213	87.8854	77.933	113.736
	70.3026	73.2561	41.2523	71.9637	84.329	25.7879		87.3556	72.7786	84.8929	70.6536	72.1864		75.1049	64.2911	88.3337	79.5668	115.383
	70.9454	74.2757	41.7881	77.8253	86.0721	27.4904		87.7869	73.1432	85.2783	71.0747	72.6335		75.3587	66.6689	88.7312	79.9169	116.072
	71.4373	75.5312	42.2427	78.1415	86.2437	28.0303		88.5868	73.5646	86.0208	71.3073	75.0678		76.0109	68.3986	88.7409	79.996	116.64
	71.5946	75.5595	43.3385	78.2634	86.7493	28.437		89.3396	74.1585	86.5985	71.7966	75.3348		76.8254	69.6833	90.3777	81.2122	117.542
	76.0325	76.9525	43.9432	78.8889	87.2715	28.952		89.5009	76.6005	87.8102	72.7296	76.4982		77.5578	70.6276	92.2014	81.6345	119.585
	76.7165	77.0038	44.5391	79.0137	88.1105	29.1892		91.4766	76.8201	88.4258	72.8084	76.7548		78.6612	72.1342	93.0883	81.6809	120.239
	76.8231	77.0421	44.5404	80.1945	88.2654	29.3413		91.4938	77.4161	89.326	74.6173	77.2106		79.0678	72.3348	94.6178	81.9559	120.317
	77.6996	77.5401	44.8308	80.5234	89.2765	29.5296		92.1701	77.6916	90.578	74.9061	77.5822		79.7394	72.5029	96.4342	81.96	122.394
	77.8791	77.931	45.9047	81.0435	90.0191	29.8507		92.19	78.0742	91.5188	75.2784	78.2662		80.8343	75.4226	96.5282	82.2381	122.89
	78.338	78.8539	46.1906	81.9283	90.3819	30.1823		92.3276	79.0389	91.7168	75.4243	78.3434		82.0411	75.5377	97.465	84.0053	127.549
	78.7727	79.6426	46.486	82.7192	90.651	30.2587		92.6639	79.3513	91.7905	76.8657	79.4511		82.0647	76.2094	99.5715	85.1264	128.567
	78.9111	79.9603	46.7991	83.1354	91.1867	30.5014		92.9988	79.4278	92.3636	77.2371	79.502		82.2625	78.282	100.039	85.4037	129.079
	81.1277	80.1452	47.0121	83.7564	91.9052	30.5183		93.2017	80.2219	93.8942	77.403	80.3897		82.309	81.8417	100.589	85.8567	129.379
	81.8444	80.1541	47.161	84.1747	92.8929	30.6333		93.3236	80.5181	94.5667	78.6375	80.9136		82.4502	82.8338	102.433	87.5485	129.484
	82.5215	80.9059	47.3444	84.5793	94.6633	30.7544		93.4675	80.7706	94.9276	78.9634	81.1414		83.7654	83.1445	103.584	87.582	133.433
	83.7839	81.091	47.4816	87.1931	96.4367	30.8629		95.0365	81.0408	95.069	79.6055	81.9999		84.3982	83.2135	105.974	89.7618	133.802
	86.4151	81.6181	47.6579	88.0829	97.3539	31.5925		95.7315	81.3971	96.2326	79.6192	82.7144		84.7324	84.3698	109.157	90.4781	134.906
	87.0237	82.7238	47.971	88.5631	97.4976	31.924		96.6295	82.6499	96.7082	79.6651	82.8343		84.7445	90.2913	115.983	90.6557	136.599
	89.7965	83.2456	48.6367	88.6141	99.1824	32.8599		96.8473	82.9947	97.553	80.2205	83.4258		85.2904	92.2972	118.45	90.7243	142.015
	90.8575	83.4251	48.9218	89.2052	100.825	33.4089		97.1385	83.2504	98.731	80.8207	83.6082		85.8162	92.4323	132.482	91.7383	142.801
	91.0508	83.8065	50.0644	89.7358	100.972	33.6417		98.2524	83.3947	99.8006	80.849	85.8811		85.847	92.8865	134.691	94.9068	152.775
	91.1877	86.9489	50.2532	91.0557	103.487	33.6902		98.3803	83.8298	101.138	80.8726	87.3158		86.3735	93.7076	136.062	97.9439	157.153
	91.4965	86.9627	50.4677	91.323	103.936	33.806		98.4479	85.122	102.511	83.548	88.178		86.6147	94.0088	137.36	102.219	157.323
	92.2735	88.7811	50.5009	91.9597	106.733	33.9344		98.7647	86.1473	103.1	83.8898	88.9081		87.2476	94.6187	139.421	102.891	157.523
	92.9129	89.5601	51.1046	93.3894	110.586	34.9371		98.7953	86.7751	103.556	84.6287	91.7053		87.6533	95.8583	141.014	106.285	157.786
	94.3816	89.676	51.3985	94.1048	113.633	35.3269		98.9197	87.0402	104.561	85.9054	92.2925		88.5079	96.9364	143.685	109.147	158.289
	95.9972	90.0478	51.6669	94.9377	114.154	35.5994		99.5906	87.0993	104.795	85.9258	92.3991		88.8122	99.3149	145.312	111.912	158.299
	97.2642	90.049	52.3311	95.3581	117.205	35.6958		101.85	88.1991	107.392	86.0703	93.3996		90.3557	101.269	145.914	114.823	159.987
	97.5206	91.2007	52.917	95.9798	118.214	35.8125		102.368	88.2411	107.855	86.5481	94.1837		91.8765	101.96	148.82	115.61	160.769
	99.9309	91.4092	53.3599	96.5098	119.856	36.2001		102.494	88.327	108.133	88.919	95.767		91.8851	102.273	150.18	115.939	163.996
	101.459	91.9794	53.5568	99.9432	121.118	36.205		103.548	88.3903	109.09	89.1191	96.7768		93.3702	104.98	151.374	118.1	168.657
	101.47	94.3386	53.8089	102.069	122.876	36.8014		103.887	90.1257	109.521	90.3327	100.509		93.7386	107.139	155.083	119.217	169.537
	104.382	95.4041	54.8609	102.189	124.014	37.8151		105.057	90.6392	110.723	90.8537	101.831		94.093	108.294	159.102	122.972	171.6
	105.585	96.7884	55.5081	105.958	134.662	37.9309		105.743	91.532	111.429	91.9366	103.184		94.2803	113.718	160.769	123.335	177.481
	106.183	97.6646	55.8887	109.739	138.784	37.9317		105.84	92.9527	117.214	92.2287	103.433		95.8171	115.881	161.342	132.307	184.188
	109.002	99.309	56.2253	111.139	143.918	38.0104		105.862	95.7883	118.29	93.2441	103.452		96.0898	117.643	163.878	143.335	197.074
	111.405	100.688	57.7198	120.374	153.694	38.4615		106.081	96.3319	118.961	95.6802	105.524		96.2339	123.299	170.11	152.804	200.687
	114.158	101.146	58.3236	123.188	163.646	38.8692		107.057	98.1505	118.993	97.2153	106.143		96.3482	124.186	170.267	155.494	203.637
	115.585	101.338	58.433	126.478		39.9613		107.198	99.1403	119.409	97.2457	106.736		97.7295	127.683	173.486	162.373	204.778
	119.714	101.424	60.1386	133.28		40.0711		108.78	99.1404	121.019	100.245	111.394		99.0677	128.469	173.586	167.017
	121.1	101.798	61.0707	137.558		40.1102		109.571	103.833	123.77	103.138	111.762		102.094	129.274	176.505	167.815
	121.646	102.856	62.0009	141.908		40.3992		110.357	105.339	130.615	103.628	115.118		104.847	132.022	176.853	168.584
	121.683	103.66	62.6039			40.6169		110.746	106.067	131.3	108.381	117.358		106.9	132.583	177.74	169.155
	123.208	103.726	62.6433			40.7631		112.523	106.759	137.618	108.867	127.193		108.22	137.014	179.356	170.083
	124.066	104.304	62.8104			41.3961		114.892	107.124	138.953	109.739	130.896		108.376	137.187	181.291	171.753
	124.614	104.816	63.0288			42.0037		114.982	108.673	139.102	110.32	132.761		112.674	137.524	200.096	176.632
	128.48	105.004	63.6661			42.8551		117.405	111.241	139.581	112.365	133.198		116.722	138.05	200.399	178.114
	128.485	105.841	64.4098			43.2525		117.507	113.487	143.233	113.287			120.276	139.107	201.713	178.319
	128.673	107.89	64.6393			43.3933		119.276	114.532	143.892	118.936			120.288	140.369	213.136	179.227
	133.26	108.606	66.9491			43.4939		119.729	115.651	149.832	119.319			120.362	141.715	214.255	181.276
	135.268	108.841	67.1179			44.0712		122.039	116.569	150.64	119.788			124.56	141.829		181.813
	138.285	109.446	71.1357			44.3991		122.381	117.858		121.595			125.384	143.25		181.908
	140.928	109.611	71.8189			44.8302		122.586	118.324		124.716			130.178	144.506		187.985
	141.471	111.73	73.8089			45.3185		122.984	119.604		125.893			131.223	144.951		189.361
	142.719	113.501	74.028			45.6296		125.313	119.917		142.622			133.404	146.603		191.133
	145.612	113.991	75.1228			46.4319		126.081	120.227		142.748			140.757	147.162		191.147
	148.356	114.547	79.7492			47.3598		128.171	121.023		145.436			142.859	152.233		194.921
	149.249	119.448	83.0112			47.7251		131.839	123.833		150.662			145.148	152.56		196.859
	153.532	120.397	83.5127			48.4121		132.954	126.318		155.216			145.168	153.973		207.658
	153.724	123.28	86.3428			49.7312		136.104	128.212		156.097			147.22	154.022		208.363
	155.14	123.778	86.3542			51.5927		137.058	128.485					153.529	155.77		226.164
	156.083	124.798	88.6295			52.6935		140.913	131.262					155.341	162.391
	157.529	126.302	90.0264			53.3192		140.999	131.848					156.142	162.503
	158.653	126.653	91.6397			53.5878		141.926	132.401					157.49	164.169
	159.774	126.684	92.6877			54.5816		143.62	132.773					164.367	164.559
	163.921	127.593	99.6461			57.3342		144.883	134.095					168.732	168.475
	165.644	130.1	102.159			57.5456		145.088	134.19					169.854	172.917
	167.376	133.393	105.037			60.295		145.995	136.781					170.233	173.97
	171.817	134.211	110.224			65.7994			138.417					174.276	175.504
	177.068	142.614	118.534			77.5116			141.684					174.739	176.004
	178.088	142.828				77.6478			149.384					183.9	178.121
	178.604	146.698							149.399					187.255	179.033
	183.331								149.994					191.816	184.688
									150.684					203.791	189.026
									153.166						191.039
									154.153						195.483
									156.576
									158.72
									160.473
									160.538
									165.963
									167.321
									172.885
Moyenne	100	90.4159	64.825	85.3519	94.0799	47.0279		100	98.4607	86.8338	90.4517	76.5339		100	108.966	101.29	105.678	104.704
SD	32.873	31.3045	25.3857	29.2164	34.4696	18.947		25.3334	27.4281	23.9293	26.0497	21.0729		37.3487	41.0202	48.3959	52.212	39.8458
SEM	2.14897	1.87415	1.59599	2.52392	2.65938	1.42014		1.60544	1.69129	1.4869	1.60935	1.54514		2.34347	2.59435	3.00717	3.21343	3.00349
variance	1076.02	976.458	641.887	847.23	1181.08	356.972		639.203	749.443	570.402	675.995	441.682		1389.44	1675.93	2333.12	2715.77	1578.66
t.test inégale		0.000837197	1.75897e-33	1.38099e-05	0.0842504	6.42723e-64			0.509496	3.43433e-09	3.14673e-05	3.23659e-23			0.0106187	0.73525	0.154017	0.21775
		***	***	***		***				***	***	***			*
