# Supplementary material for: XAB2 dynamics during DNA damage-dependent transcription inhibition
Source: eLife. 2022 Jul 26;11:e77094. doi: 10.7554/eLife.77094 (PMC9436415; doi:10.7554/eLife.77094)
Supplement: Figure 6—source data 2. [file elife-77094-fig6-data2.xlsx]

## Sheet: 12.04.2021
	PLA							IF XAB2						IF XPB
Rawintden	NoUV	1h	2h	4h	16h	control		NoUV	1h	2h	4h	16h		NoUV	1h	2h	4h	16h
	7923554	6267445	8330046	11390956	5873708	2123731		38641407	34349163	33413160	27603162	21316572		3498095	3820948	4001469	3363164	6303133
	8822706	7756244	8950652	11918184	6189313	2326395		39573673	40782271	35667479	32012289	24570094		3684457	3858935	4085029	4723168	6839573
	9764365	8234708	9970663	13326401	6732243	2471264		40443050	41830335	35940912	36090851	25422026		4300269	3985841	4090030	4877225	6866520
	12345867	9509002	10321565	13390256	7369800	2512876		40810408	42367021	40203649	38843485	25660255		4451218	4129967	4285427	5014666	6925655
	12609903	11039407	10416564	13510862	7913931	2734245		42020831	42461520	41082380	39470664	25852462		4531138	4154301	4308924	5187486	7242610
	13170710	11286695	11435488	14811022	7916414	2750403		42536469	44709780	41756720	40072783	27675731		4556733	4259465	4346854	5251657	7622287
	13222413	11881501	11664160	15162427	7963299	2843101		42733866	45477620	41816656	42101949	31951161		4688966	4296108	4377304	5322508	7811641
	13767407	12499218	11737341	15609554	8074057	2846581		45137673	46190047	43519541	45130240	33189612		4691654	4346983	4689608	5563777	8081908
	13900307	12693164	12175394	16016175	8148911	2873308		45407702	46243181	44752929	47311854	34606968		4703466	4478372	4765433	5693727	8168834
	14071935	12850785	12226665	16431023	8625317	3089211		46411604	46749885	45554318	47975379	35719093		4876242	4553482	4846210	5846288	8220282
	14336928	12870791	12339242	16569450	9411771	3162768		47609706	47255876	45603989	48474138	39249436		5071962	5185351	5146225	6498520	8274576
	14607622	13009666	12854106	16783687	9445127	3179411		47671268	47561083	46097273	48784396	40481212		5127108	5509407	5223185	6540582	8905712
	15500068	13513395	13573464	16902966	9652964	3258734		47762635	47863348	46265323	49316181	41242024		5133825	5630496	5269831	6929012	9115607
	16232640	13669341	13603699	17191819	9675207	3451682		47915924	49383960	46524807	49811496	41421668		5202745	5832487	5291007	6961481	9237278
	16312979	13800219	13712835	17288929	9682095	3488835		48476304	49827296	46556227	50329912	43713728		5357939	6352591	5421850	7045772	9637741
	16335398	14021316	13846210	18158063	10315045	3599935		48607916	50106614	47020528	50787102	44103704		5397082	6653877	5500883	7113317	9699147
	16442790	15237886	13966628	18314227	10428344	3606702		48909036	51598517	47307093	51516599	45483306		5407172	6929281	5557485	7127775	9767520
	16532859	16299815	14026633	19008692	10639811	3627783		50151202	51786183	48892991	51594809	48323376		5458888	6986667	5591804	7150064	10269301
	16697246	16338388	14066462	19662033	10675039	3646042		50594117	52082936	49104291	51622432	48589460		5504087	7028856	5734698	7253894	10432933
	16841210	16440783	14126959	19866032	10925817	3669181		50767888	52628415	49574284	52383499	49518495		5509431	7161555	5905696	7281237	10898857
	17225575	17060893	14901178	20175906	11606376	3703531		50779540	52786309	49783909	52589308	49925932		5518573	7183197	5917472	7295768	11193038
	17463312	17093750	15064323	20533317	11734839	3797561		51255726	53412506	50416088	52916038	50186800		5563170	7267701	5975430	7343445	11356187
	17556635	17180490	15758967	20930934	12060073	3823345		52391741	53762414	51004524	53624749	50248280		5744028	7392970	6300213	7360428	11484352
	17595368	17289238	16011411	21082807	12094468	3875939		52457467	54043399	51131494	53662971	51066972		5795721	7417832	6412734	7522254	12085188
	17638190	17453166	16466971	21093792	12304415	3939917		53544674	54283882	51757925	54176175	52097363		6258015	7457942	6486353	7545487	12714838
	17850668	17522287	16599585	21527129	12468666	3963709		53785374	54689360	52063663	54222517	52164658		6290401	7532260	6543259	7548614	12746442
	18154551	17941902	16695252	21539495	12479683	4041981		54126315	55636415	52533051	55118879	52452348		6416174	7594728	6583909	7561181	12931625
	18239469	18139577	16838661	21862092	12823056	4066774		55262952	56952524	52805568	55336622	52849502		6425281	7636760	6627799	7681993	13251051
	18272169	18587717	16844581	22103893	13011503	4226940		55336797	57293323	52896552	55383766	52974491		6427335	7687665	6724284	7774255	13336194
	18646183	18765339	16864652	22290417	13295570	4233829		55687892	57656847	53009117	55702795	54580687		6431277	7851530	6790516	7872460	13351151
	18657720	19311980	17344705	22592471	13435581	4252156		55847818	58269067	53199331	55741819	55338612		6662387	7945542	6863789	8239311	13587326
	18784694	19398686	17971621	23394150	13589696	4281784		56935222	58482267	53623976	55878669	55878489		6908563	7990340	6872362	8377845	13806770
	19390610	19399897	18037007	23564995	13739131	4287574		57220637	58579109	54387644	56251266	58383147		6996058	8118354	6885121	8462243	14067154
	19591281	19543252	18303939	23935835	13913923	4335968		57246579	58876390	55860771	56457382	58868134		7049545	8183442	6885474	8522690	14106675
	19702871	19563811	18494499	24067389	13995195	4362848		57745576	59345050	56307060	57587478	59293849		7197277	8270048	6966672	8562313	14156637
	19763039	19626772	18678536	24067662	14080048	4553576		58115957	59519077	56938189	57806998	59564295		7210892	8392564	7073899	8570374	14222666
	19783696	20097004	19097967	24270637	14096891	4562466		58190511	59574917	58048497	58081069	59724343		7461670	8413587	7244516	8644422	14239318
	19840240	20308273	19199085	24428713	14331477	4581156		59178226	59904015	58152730	58466288	59888740		7477981	8513149	7437693	8686846	14974534
	19861019	20824826	19442779	24452030	14593732	4679426		59515428	59970797	58849977	59046164	60340153		7566751	8518744	7580162	8710150	14996753
	20009806	21006142	19552934	25208091	14839408	4696017		59618318	60999159	59917275	59450416	60764015		7582897	8593665	7669157	8710336	15083243
	20264294	21255416	19587545	25339469	15484866	4728321		59664161	61101848	60266524	59783177	60769717		7612327	8612856	7671352	8730671	15179958
	20270485	21316470	19604128	26201497	15730980	4793827		61058725	61679122	60919877	60557513	60811375		7643054	8649688	7701022	8780957	15194905
	20432414	21498031	19883666	26446409	15993288	4823652		61135133	62556570	61507206	60735781	61275587		7643813	8670520	7753681	8970783	15497987
	20507272	22299263	19920334	26845793	16080920	4883193		61768349	63447503	61697555	61303362	61420351		7673132	8902478	7963073	9050611	15746149
	20653065	22331627	20164781	26986938	16300410	4892338		62186848	63791410	62938385	61316039	61558958		7693118	8937899	8039284	9067985	15937942
	20723334	22447173	20165384	27107377	16314100	4896528		62925610	63921171	63123436	62629300	61896987		7833260	8945347	8049305	9134195	16086603
	20859767	22565655	20242618	28310997	16567671	4922766		63420191	64421722	63494613	65672773	63183233		7839131	9001978	8130213	9177988	16371273
	20894080	22631519	20368935	28463233	16907234	4932170		63577308	64953962	63540904	66178864	63230465		7901866	9020477	8254089	9205315	16396061
	20982959	22907451	20499375	29354663	17034471	4942106		63996431	65604265	63557844	68269349	63917038		7924338	9125621	8271920	9265399	16536528
	21094061	23960181	20559392	29643308	17264492	5000813		64212254	66412726	64710289	68318954	64406820		8043072	9232165	8489097	9445300	16619357
	21220124	24692510	20574130	30238689	17551686	5032643		64572645	66484479	64901449	69497729	64603526		8057471	9350560	8492398	9450117	16800086
	22261984	24931980	21331575	31234615	17987394	5199424		64656832	66599496	65194139	70346820	64746918		8125822	9497773	8560670	9462771	16856156
	22274864	25056061	21722055	31837520	18003122	5222459		65112330	67149593	65732223	71778711	66153606		8153347	9530194	8634060	9596666	16986142
	22362029	26878780	21757733	31916623	18115537	5430771		65985764	67279355	65793317	71861694	68256318		8254995	9700778	8652814	9788925	16986506
	22365450	28008112	22033348	32930340	18333655	5455139		66560648	67907968	66366308	72568286	70413447		8266658	9776459	8727772	10002827	17291107
	22966838	28550573	22274919	33125669	18532464	5662880		67345210	67998149	66493778	73913334	71298873		8335365	9912323	8810608	10210861	17314974
	23007172	28709382	22305380	34298744	19542312	5664107		67380086	68136668	67187947	74427326	71632507		8429093	9963294	8848897	10444300	17901208
	23073204	29098524	22319269	34686661	19729800	5688237		67524279	68479975	68116560	74611911	71806134		8472830	10000754	8904792	10542402	18418410
	23110131	29315690	22714073	35460337	19905108	5766631		67846879	69298478	68179677	75339265	72204490		8545998	10024511	9148755	10580507	18466647
	23146766	29822633	22960441	36801626	19950647	5775478		67882189	71533718	68739027	76015167	72947715		8567548	10211906	9322607	10918908	18799487
	23417878	33639246	23626781	36879161	20441879	5800749		68767459	71897023	68843048	77129304	75121990		8618784	10243536	9364527	11618779	18817571
	23635981		23846906	37652760	20470191	5880002		69344173	72263168	69057435	78615338	76243252		8728735	10309077	9374645	11672568	19016744
	23726393		23925683	38202016	20500117	5883934		69656781	72442241	69606343	79524689	77512762		8847421	10569452	9388396	12059551	19100197
	23877653		24200319	40975243	20742620	5984716		69763264	73565672	69653617	80767008	78828213		8858569	10589880	9471058	12817138	19465688
	24648239		24403350	41266283	21359458	6005570		69829590	73702621	69674074	80787908	81961437		8979655	10646927	9588777	12824445	20654932
	24847655		24462516	41488645	21632708	6009122		70859173	74069840	69857763	82034042	82446551		9057757	10729243	9590598	12844624	21085831
	25139407		25916841	43158701	21974105	6037353		71026360	74074671	70774018	82064809	83296785		9191276	10799223	9683563	13801584	21286632
	25861794		26101527	44109287	22043750	6067427		71252153	74344213	71087502	82680846	88217056		9379230	10808724	9738047	13824067	21329826
	25894805		26121024	45012956	22299835	6118192		71327238	75493976	71125048	83550847	89869191		9408754	11050044	9839538	13918488	21440882
	26359332		26127803	45081668	22601996	6124154		71683175	76684152	71351430	83763805	92483008		9469138	11535266	9856377	14088234	22037241
	27257146		26508934	46014984	23404707	6188022		72027573	77276491	71486329	84142296	92878307		9522831	11563967	9873144	14490972	22126478
	27757023		26523695	46452446	23571516	6195022		72038284	78109818	71607457	84386964	94329548		9650031	11694696	9904245	14542913	22466476
	27801372		27136834	51303613	24037001	6196034		72150438	79020472	72184297	85038480	99917278		9685342	11757667	10058667	14616110	24718764
	28592350		27251689	51559157	24425814	6290220		73031590	79543256	72213786	85867938	101367601		9755029	11911044	10071671	14768945	25031248
	28867289		27279040	54899277	25017862	6581160		73615001	79706018	74172131	86282283	103058457		9759254	11915464	10133984	15267566	25077941
	28952351		27288604	56282708	25254747	6630166		74885605	79819935	74849565	86954807	104372774		9779597	12236935	10299710	15510648	25814526
	29037578		29599305	56837104	25291796	6739980		77116902	79860832	76338918	88304770	107349098		9913598	12480793	10429238	15626835	27395103
	29128006		30171074	59965767	25773123	6760291		77129792	80233201	76687862	88653006	107524518		9942978	12667002	10549942	15632447	27854949
	29182174		30965398	60877997	26264057	6811982		77164073	81508382	77387161	89128887	122780795		10309932	12786562	10619804	15760288	28529905
	29347518		31553245	63297758	26739765	6814559		77452009	82513889	79201292	89183266	127177281		10448707	12795827	10705738	16028661	30262956
	29709070		31559566	63548639	27494052	6843512		78310843	82831684	79888991	90610589			10518684	13043693	11377967	16286555
	31204993		33374348	77354591	28559620	6851577		79541824	83446781	80865451	92525024			11056336	13728153	11554110	16416326
	31208756		34503800		33397562	6902840		79838042	83564438	81186115	102910895			11349752	13891439	11661368	16860884
	32029948		35708195		37215487	7209718		80244466	84347546	82680427	104402532			11353143	14323955	11817158	17807409
	33157072		37513104			7430546		81210711	84399227	82821110	108452873			11406799	14586259	11834493	18058235
	33297255		38233038			7645636		82771937	84641856	83906021	110996662			11705918	15168648	12150163	20669948
	35253596		41387050			7911494		84302719	84812216	85704260	114053498			11840375	15659167	12991508	22220761
	35434460		42778528			7940299		84754532	87461867	92308387	121692290			11903700	15749001	14260497	26257121
	39128156		45255650			7942022		86994492	87601215	92977722	126095548			11966275	15752040	14825995	27211888
	41267331		47878454			7973709		88665810	87747411	94539651				12124803	16234179	15515001
	42281321		52671553			8069377		90489500	87892986	101734437				12150960	16455416	15552408
						8081230		91438056	88531599	103585155				12476368	16979704	17057692
						8389063		91649945	89498009					12987574	17223457
						8677818		94297283	90322472					13307506	17590547
						8977591		96025108	90439256					13415583	17600727
						9198417		96814765	91271513					13491008	17761859
								97670037	91977897					13965243	17876877
								99997973	92758269					14045188	18096556
								102269013	93562119					14731954	18698301
								109161153	94952584					14911022	18819947
								112040042	97323027					14928679	19036522
								112867154	97451532					15690025	19224758
								113381418	98155580					15992892	19812566
								113458686	100008043					16156612	19964077
								117465541	107158355					17610568	20578444
									108192379						23186737
															24945092
Moyenne	2.20136e+07	1.89713e+07	2.18283e+07	3.02913e+07	1.64523e+07	5.21256e+06		6.79145e+07	6.88729e+07	6.26213e+07	6.78029e+07	6.29744e+07		8.68139e+06	1.07595e+07	8280937	1.05289e+07	1.54614e+07
SD	6.84896e+06	5.95518e+06	8.85774e+06	1.42812e+07	6.48259e+06	1.67466e+06		1.85738e+07	1.66489e+07	1.48813e+07	2.02148e+07	2.29259e+07		3.13346e+06	4.64857e+06	2.77058e+06	4.58931e+06	5.71712e+06
SEM	717966	762482	928543	1.5771e+06	707308	170919		1.81262e+06	1.61708e+06	1.55149e+06	2.14276e+06	2.56319e+06		305795	449394	288853	486466	639193
Par rapport à NoUV
Moyenne	100	86.1799	99.1582	137.602	74.737	23.6788		100	101.411	92.2061	99.8358	92.726		100	123.937	95.3872	121.281	178.098
SD	31.1124	27.0522	40.2375	64.8746	29.4481	7.60738		27.3489	24.5145	21.9119	29.7651	33.757		36.094	53.5463	31.914	52.8638	65.8549
SEM	3.26146	3.46368	4.21804	7.1642	3.21305	0.776425		2.66898	2.38106	2.28447	3.15509	3.77415		3.52242	5.17652	3.32726	5.60355	7.3628

## Sheet: 21.03.2021
	PLA							IF XAB2						IF XPB
Rawintden	NoUV	1h	2h	4h	16h	control		NoUV	1h	2h	4h	16h		NoUV	1h	2h	4h	16h
	4677870	1968641	1731516	7125256		1172037		21307941	17286897	17260813	22826896			3417115	2133911	5625833	5030476
	4750073	2641376	3512343	7831919		1495478		23543326	22318432	22490632	24604423			3521982	3031576	6398494	6531793
	5400368	2725816	4077389	7977183		3967216		26665138	24739282	23121130	24941904			3602490	4681209	8351346	6865548
	5890420	4175105	5304813	8116594		4537228		27994735	24831920	29978203	31187335			3951579	4975395	8929960	7062795
	6163927	4261467	5628446	8553768		4606963		28459392	25045161	31225928	33348609			4107889	4978370	10193643	7162902
	6178607	4588975	5649909	8609314		4646975		28570252	26786552	31921045	35148827			4414167	5486056	10691373	8131725
	7117479	4843357	6043671	8691606		4829789		29087010	26814805	33393426	35807059			4823191	5589656	10913167	8176001
	7560269	5048873	6341909	8894610		4844422		29583047	27074830	33959686	35855283			4911724	5604618	10926595	8418909
	8051931	5187390	7125334	9189935		4846539		30616759	27346198	35345583	37176221			6142821	5679185	11131419	8772925
	8090020	5230039	7251020	9322819		4933454		33658677	27602441	36770604	39371949			6202200	6233369	11270930	8977686
	8116592	5368898	7313959	9698324		5215082		33954140	28049510	36972223	39588211			6353002	6415219	11364603	9366916
	8245391	5790313	7630208	9739057		5784396		35347937	28077625	37197330	39902749			6624244	7142229	11425162	9372653
	8507845	6058259	7669556	9796523		6268894		35437855	28807620	37788466	40473458			6626843	7619561	11656765	9671065
	8631365	6251743	7677101	10026179		6290361		35756012	28986058	39044775	40737621			6770167	7797057	12014540	9714913
	8682801	6299839	7698181	10203938		6419304		36761539	29007974	41028874	41242581			7018327	8022915	12074034	9808164
	8861361	6310938	8022349	10208896		6421917		37756868	29802773	41730429	41455712			7173021	8071507	12105432	9811570
	9039656	6450317	8269251	10358981		6710289		37792593	30225160	41932469	41495136			7318140	8092505	12144588	9967460
	9162977	6657756	8472105	10717681		7664139		39013406	31358096	42544714	41510709			7540972	8141440	12181069	10252075
	9262950	6814709	8563702	10782098		8264572		39053001	31522813	42559932	41697314			8051957	8165780	12305318	10423514
	9574966	7018091	9010912	10989388		8348899		39151459	31687056	43291291	41920505			8080733	8214747	12353225	10423514
	9653544	7277036	9398534	11263900		8675241		39476610	31712691	43382616	42495954			8107680	8296743	12417043	10496688
	9802308	7300015	9440638	11313397		9171770		40966230	32691145	44105457	42673793			8154325	8476456	12437594	10723179
	9825923	7444780	9581388	11489338		9766556		41615343	33932988	44508963	43255396			8170188	8485683	12460847	11027957
	9840976	7512083	9655310	11513526		9943252		41672663	34036510	44650651	43389942			8257789	8498544	12516433	11130474
	9866673	7671602	9938208	11579410		9950341		41856083	34191144	45178694	43389942			8346373	8710459	12851187	11309257
	9978435	7691827	10007885	11644326		10037270		42143441	34201690	45205510	44120634			8567359	8733677	13218841	11714373
	10018689	7754538	10574246	11677489		10256248		42304894	35655917	45921175	44964332			8678763	8897975	13317207	11949225
	10042392	8071306	10626651	12143804		10905843		42446219	35657286	46126404	45125238			9556921	9403523	13326671	12195589
	10042653	8081752	10788189	12248516		10968860		43117041	35724672	47581203	45385236			9567121	9544892	13737014	12225076
	10227881	8273556	10978418	12261973		11430838		43182135	35888374	48454766	45415741			9671919	9575256	13873824	12374745
	10424364	8278063	11150514	12288555		12160003		43699516	36807822	48736362	45673694			9695919	9583720	14073825	12542572
	10580013	8284337	11256445	12560099		12404996		43746555	37567874	48904728	46551730			9716525	9600505	14410466	12576906
	10650695	8287047	11408347	12561516		12589218		43816567	37776937	49105587	46723778			9990592	9922465	14575685	12605293
	10673607	8334822	11627047	12596609		13655748		43916659	37987767	49329859	46983724			10074354	9978495	14875098	12631855
	10773217	8390114	11690458	12809492		14580915		44902036	39032035	51394939	47957920			10212840	11101236	14941987	12660142
	10834026	8444775	11979835	12870995		15016346		45758079	39588797	51579170	48244105			10343937	11209737	15132511	12854433
	10918667	8669078	12487018	12995355		15650038		45784007	39783723	51943772	48468470			10508388	11267800	15535295	12951048
	10935436	8672768	12666641	13154018		16025759		46670234	40006767	52426826	48911162			10763253	11331456	15995978	13084726
	11011000	8737473	12736959	13155686		16486469		46800651	40173575	52690594	49683891			10883202	11385732	16151410	13142557
	11057577	8748273	12853271	13312935		16900788		47185601	40447532	52874891	50151941			10936281	11471894	16169969	13183077
	11123008	8826093	13083967	13329981		17767316		47467387	40603056	53002102	50278642			11248704	11864296	17625549	13220296
	11201595	8959238	13221511	13413044				47890040	41249687	53871402	50343706			11312426	11865285	17745959	13235748
	11325240	9010530	13432210	13494487				47905161	41475833	55408700	50443723			11373810	11877745	17972255	13561075
	11498252	9166076	13501499	13539068				48148482	41769379	56920207	50490671			11390923	12067526	18220587	13590489
	11570946	9251323	13979442	13868280				48243306	42867044	57534543	50537660			11596118	12245905	18750990	13678810
	11588972	9547823	13991577	13985093				48316451	43262272	57738740	50781214			11922889	12332211	18756937	14002965
	11884140	9702819	14317595	13986352				48403631	44040598	58217237	50837075			12031676	12450680	18854119	14239330
	11968296	9717594	14686725	14330823				48838206	44509505	58530083	50842951			12081080	12839741	18921767	14252722
	11986570	9719147	14836640	14490141				49148064	44685939	58724086	51098608			12220678	12961166	19198459	14293067
	12090670	9762305	14924194	14507213				49334015	44840654	60409852	51197641			12233762	13390678	19414648	14322425
	12292631	9944637	15611531	14579577				49478776	44939160	61492766	51405959			12276774	13427550	19714222	14480599
	12298131	9976424	15681869	14759832				49570357	45911436	62495148	51898083			12303470	13441508	19765143	14517785
	12334017	9983177	15995949	14895385				50042077	46801684	63807237	51950614			12311264	13453312	19793062	14601037
	12487199	10006721	16554669	15263952				50058981	46857211	65687944	51957803			12334810	14507915	20026763	14644161
	12786813	10024477	16678512	15479212				51394298	47081702	66089202	52048097			12392037	14635379	20533208	14719802
	12909926	10028946	16877843	15534621				51728510	47254586	66187821	52506142			12537675	14651622	20562186	14884663
	12934147	10141647	16887044	15841500				52079087	47580043	66450761	52533213			12559399	15130670	20999729	14913887
	13103774	10200766	16950641	16052460				52140370	48275488	67985779	52810959			12577638	15242108	21212314	15065777
	13257374	10234635	17195147	16093974				52185315	48321127	68361848	53737125			12628739	15772941	21733117	15066600
	13596428	10362273	17224514	16334163				52206055	48541879	68411982	54052122			12814009	15937471	22145694	15190067
	13604397	10439816	17571581	16615349				52729959	48861211	68842514	54342149			13066927	16086434	22814680	15373599
	13663944	10486119	17648906	16710983				53650375	50960256	69454995	54715126			13081659	16091162	23499798	15421273
	13666918	10490544	17747301	16884191				53755544	52079600	69691735	55069605			13127260	16865878	25331182	15427357
	13674779	10533346	17954384	16899344				53864548	53487675	70214896	55164318			13132823	17030001	25508058	15522342
	13745590	10684263	18204369	17112260				53965941	54877665	70615660	56065795			13164529	17169558	25838814	15676869
	13757237	10892034	18517050	17416368				55218990	55746184	71410419	56322481			13531466	17341025	26304185	15892536
	13797727	10998000	18577143	17562337				56726724	56536317	73040352	56811447			13649362	17407777	26479151	15924110
	13913862	11069687	18670810	17812157				56758486	56767978	74086467	57063546			13771318	17773183	26532472	15965147
	13973221	11100288	18713108	18010681				57304262	58004576	74968254	57254224			14546467	17953345	27343245	15981567
	14170084	11126139	18755155	18213368				57616166	58417781	75131224	57670233			14604727	17970033	27932374	17153068
	14328068	11161915	19223841	18461860				57733850	59075790	75676457	58801761			14860200	18282204	27967165	17588300
	14446642	11275098	19264731	19098265				58004406	59554949	76418509	59247203			14982986	18560423	29013794	17614193
	14549798	11286168	19496055	19121431				58670272	61060104	77896011	61110948			15372135	18576276	29189209	18377975
	14817481	11295682	19752457	19331399				59037602	61262625	82045973	61620073			15398914	18698582	29190199	19436533
	14906014	11396480	20213318	19361600				61538514	62685220	83120443	61646891			16028848	18929206	29307046	19939978
	15132087	11417170	20751345	19536550				61700223	64593097	84474717	61811324			16751836	19042015	30468461	20672487
	15243849	11609789	20943333	19895353				61887272	68073344	88188498	63759011			17017898	20475306	31189313	20753716
	15250978	11629034	21290222	19898137				62465976	68093680	90047777	64566257			18248007	21762550	31341060	20808535
	15293634	11866888	21388665	20411414				63121360	68430596	92480473	65086853			18887673	22822245	33586932	22060286
	15637430	11990836	21605189	20451816				63277442	69573027	111946347	67051674			19084549	22969724	45203399	22372248
	15809831	12081160	21844840	20620719				63986638	69588412		67345338			19332047	24194480		22786773
	15910392	12196547	21926481	21045100				64022697	70842555		69665835			19362068	25091512		23226077
	16437707	12471564	22096492	22463937				64303471	74605420		75018282			20530695	31318597		27047220
	16474070	12563487	22162923	22642626				64490803	83140481		77561996			20627504	39101019		34471429
	18159062	12983209	22225090	22753512				68623588	109979617		86458403			21223183	55362896		37347067
	18223591	13004699	22834557	22948343				71339221						21232337
	18322948	13122562	23377873	23903793				73385947						21717510
	18682718	13245584	23663722	24453013				74250090						22849959
	19347419	13282006	23784760	24522817				75230856						23047918
	19465881	13294550	24436272	24744913				80749376						25842529
	19540883	13773851	24537776	25930916				81094163						26362836
	19654285	13987196	24572967	28883596				81940274						28183310
	19921041	14050531	24776572	29542432
	20092275	14134550	25422310	39113085
	20186964	14193987	26280399
	20270449	14623668	27757347
	21937852	14682101	28372841
	22827373	14783639	28809838
	23777536	15063525	28933656
	25433256	15432722	29222928
		15449720	29990584
		15621544	30349855
		15924480	31372171
		16114004	32948085
		16365020	34333927
		16365941	36082073
		16391209
		16579011
		18448750
		19114687
		19655646
		19664739
		21274965
Moyenne	1.28141e+07	1.04679e+07	1.63951e+07	1.54088e+07	#DIV/0!	9.0637e+06		4.93217e+07	4.444e+07	5.58842e+07	4.99158e+07	#DIV/0!		1.21916e+07	1.33944e+07	1.82758e+07	1.41958e+07	#DIV/0!
SD	4.27872e+06	3.82944e+06	7.54269e+06	5.54261e+06	#DIV/0!	4.36212e+06		1.30183e+07	1.57159e+07	1.77906e+07	1.10505e+07	#DIV/0!		5.38588e+06	7.71577e+06	7.34522e+06	5.35119e+06	#DIV/0!
SEM	427872	360243	732610	571676	#DIV/0!	681248		1.35725e+06	1.70463e+06	1.98905e+06	1.19859e+06	#DIV/0!		561517	836893	821221	580418	#DIV/0!
Par rapport à NoUV
Moyenne	100	81.6904	127.945	120.249	#DIV/0!	70.7321		100	90.1024	113.306	101.205	#DIV/0!		100	109.866	149.905	116.439	#DIV/0!
SD	33.3906	29.8845	58.8623	43.2539	#DIV/0!	34.0415		26.3946	31.8641	36.0705	22.4049	#DIV/0!		44.177	63.2877	60.2483	43.8925	#DIV/0!
SEM	3.33906	2.8113	5.71721	4.4613	#DIV/0!	5.31638		2.75183	3.45614	4.03281	2.43016	#DIV/0!		4.60577	6.86452	6.73596	4.76081	#DIV/0!

## Sheet: Moyenne des 2
	PLA							IF XAB2						IF XPB
	No UV	1h	2h	4h	16h	XAB2-GFP		NoUV	1h	2h	4h	16h		NoUV	1h	2h	4h	16h
	7923554	6267445	8330046	11390956	5873708	2123731		38641407	34349163	33413160	27603162	21316572		3498095	3820948	4001469	3363164	6303133
	8822706	7756244	8950652	11918184	6189313	2326395		39573673	40782271	35667479	32012289	24570094		3684457	3858935	4085029	4723168	6839573
	9764365	8234708	9970663	13326401	6732243	2471264		40443050	41830335	35940912	36090851	25422026		4300269	3985841	4090030	4877225	6866520
	12345867	9509002	10321565	13390256	7369800	2512876		40810408	42367021	40203649	38843485	25660255		4451218	4129967	4285427	5014666	6925655
	12609903	11039407	10416564	13510862	7913931	2734245		42020831	42461520	41082380	39470664	25852462		4531138	4154301	4308924	5187486	7242610
	13170710	11286695	11435488	14811022	7916414	2750403		42536469	44709780	41756720	40072783	27675731		4556733	4259465	4346854	5251657	7622287
	13222413	11881501	11664160	15162427	7963299	2843101		42733866	45477620	41816656	42101949	31951161		4688966	4296108	4377304	5322508	7811641
	13767407	12499218	11737341	15609554	8074057	2846581		45137673	46190047	43519541	45130240	33189612		4691654	4346983	4689608	5563777	8081908
	13900307	12693164	12175394	16016175	8148911	2873308		45407702	46243181	44752929	47311854	34606968		4703466	4478372	4765433	5693727	8168834
	14071935	12850785	12226665	16431023	8625317	3089211		46411604	46749885	45554318	47975379	35719093		4876242	4553482	4846210	5846288	8220282
	14336928	12870791	12339242	16569450	9411771	3162768		47609706	47255876	45603989	48474138	39249436		5071962	5185351	5146225	6498520	8274576
	14607622	13009666	12854106	16783687	9445127	3179411		47671268	47561083	46097273	48784396	40481212		5127108	5509407	5223185	6540582	8905712
	15500068	13513395	13573464	16902966	9652964	3258734		47762635	47863348	46265323	49316181	41242024		5133825	5630496	5269831	6929012	9115607
	16232640	13669341	13603699	17191819	9675207	3451682		47915924	49383960	46524807	49811496	41421668		5202745	5832487	5291007	6961481	9237278
	16312979	13800219	13712835	17288929	9682095	3488835		48476304	49827296	46556227	50329912	43713728		5357939	6352591	5421850	7045772	9637741
	16335398	14021316	13846210	18158063	10315045	3599935		48607916	50106614	47020528	50787102	44103704		5397082	6653877	5500883	7113317	9699147
	16442790	15237886	13966628	18314227	10428344	3606702		48909036	51598517	47307093	51516599	45483306		5407172	6929281	5557485	7127775	9767520
	16532859	16299815	14026633	19008692	10639811	3627783		50151202	51786183	48892991	51594809	48323376		5458888	6986667	5591804	7150064	10269301
	16697246	16338388	14066462	19662033	10675039	3646042		50594117	52082936	49104291	51622432	48589460		5504087	7028856	5734698	7253894	10432933
	16841210	16440783	14126959	19866032	10925817	3669181		50767888	52628415	49574284	52383499	49518495		5509431	7161555	5905696	7281237	10898857
	17225575	17060893	14901178	20175906	11606376	3703531		50779540	52786309	49783909	52589308	49925932		5518573	7183197	5917472	7295768	11193038
	17463312	17093750	15064323	20533317	11734839	3797561		51255726	53412506	50416088	52916038	50186800		5563170	7267701	5975430	7343445	11356187
	17556635	17180490	15758967	20930934	12060073	3823345		52391741	53762414	51004524	53624749	50248280		5744028	7392970	6300213	7360428	11484352
	17595368	17289238	16011411	21082807	12094468	3875939		52457467	54043399	51131494	53662971	51066972		5795721	7417832	6412734	7522254	12085188
	17638190	17453166	16466971	21093792	12304415	3939917		53544674	54283882	51757925	54176175	52097363		6258015	7457942	6486353	7545487	12714838
	17850668	17522287	16599585	21527129	12468666	3963709		53785374	54689360	52063663	54222517	52164658		6290401	7532260	6543259	7548614	12746442
	18154551	17941902	16695252	21539495	12479683	4041981		54126315	55636415	52533051	55118879	52452348		6416174	7594728	6583909	7561181	12931625
	18239469	18139577	16838661	21862092	12823056	4066774		55262952	56952524	52805568	55336622	52849502		6425281	7636760	6627799	7681993	13251051
	18272169	18587717	16844581	22103893	13011503	4226940		55336797	57293323	52896552	55383766	52974491		6427335	7687665	6724284	7774255	13336194
	18646183	18765339	16864652	22290417	13295570	4233829		55687892	57656847	53009117	55702795	54580687		6431277	7851530	6790516	7872460	13351151
	18657720	19311980	17344705	22592471	13435581	4252156		55847818	58269067	53199331	55741819	55338612		6662387	7945542	6863789	8239311	13587326
	18784694	19398686	17971621	23394150	13589696	4281784		56935222	58482267	53623976	55878669	55878489		6908563	7990340	6872362	8377845	13806770
	19390610	19399897	18037007	23564995	13739131	4287574		57220637	58579109	54387644	56251266	58383147		6996058	8118354	6885121	8462243	14067154
	19591281	19543252	18303939	23935835	13913923	4335968		57246579	58876390	55860771	56457382	58868134		7049545	8183442	6885474	8522690	14106675
	19702871	19563811	18494499	24067389	13995195	4362848		57745576	59345050	56307060	57587478	59293849		7197277	8270048	6966672	8562313	14156637
	19763039	19626772	18678536	24067662	14080048	4553576		58115957	59519077	56938189	57806998	59564295		7210892	8392564	7073899	8570374	14222666
	19783696	20097004	19097967	24270637	14096891	4562466		58190511	59574917	58048497	58081069	59724343		7461670	8413587	7244516	8644422	14239318
	19840240	20308273	19199085	24428713	14331477	4581156		59178226	59904015	58152730	58466288	59888740		7477981	8513149	7437693	8686846	14974534
	19861019	20824826	19442779	24452030	14593732	4679426		59515428	59970797	58849977	59046164	60340153		7566751	8518744	7580162	8710150	14996753
	20009806	21006142	19552934	25208091	14839408	4696017		59618318	60999159	59917275	59450416	60764015		7582897	8593665	7669157	8710336	15083243
	20264294	21255416	19587545	25339469	15484866	4728321		59664161	61101848	60266524	59783177	60769717		7612327	8612856	7671352	8730671	15179958
	20270485	21316470	19604128	26201497	15730980	4793827		61058725	61679122	60919877	60557513	60811375		7643054	8649688	7701022	8780957	15194905
	20432414	21498031	19883666	26446409	15993288	4823652		61135133	62556570	61507206	60735781	61275587		7643813	8670520	7753681	8970783	15497987
	20507272	22299263	19920334	26845793	16080920	4883193		61768349	63447503	61697555	61303362	61420351		7673132	8902478	7963073	9050611	15746149
	20653065	22331627	20164781	26986938	16300410	4892338		62186848	63791410	62938385	61316039	61558958		7693118	8937899	8039284	9067985	15937942
	20723334	22447173	20165384	27107377	16314100	4896528		62925610	63921171	63123436	62629300	61896987		7833260	8945347	8049305	9134195	16086603
	20859767	22565655	20242618	28310997	16567671	4922766		63420191	64421722	63494613	65672773	63183233		7839131	9001978	8130213	9177988	16371273
	20894080	22631519	20368935	28463233	16907234	4932170		63577308	64953962	63540904	66178864	63230465		7901866	9020477	8254089	9205315	16396061
	20982959	22907451	20499375	29354663	17034471	4942106		63996431	65604265	63557844	68269349	63917038		7924338	9125621	8271920	9265399	16536528
	21094061	23960181	20559392	29643308	17264492	5000813		64212254	66412726	64710289	68318954	64406820		8043072	9232165	8489097	9445300	16619357
	21220124	24692510	20574130	30238689	17551686	5032643		64572645	66484479	64901449	69497729	64603526		8057471	9350560	8492398	9450117	16800086
	22261984	24931980	21331575	31234615	17987394	5199424		64656832	66599496	65194139	70346820	64746918		8125822	9497773	8560670	9462771	16856156
	22274864	25056061	21722055	31837520	18003122	5222459		65112330	67149593	65732223	71778711	66153606		8153347	9530194	8634060	9596666	16986142
	22362029	26878780	21757733	31916623	18115537	5430771		65985764	67279355	65793317	71861694	68256318		8254995	9700778	8652814	9788925	16986506
	22365450	28008112	22033348	32930340	18333655	5455139		66560648	67907968	66366308	72568286	70413447		8266658	9776459	8727772	10002827	17291107
	22966838	28550573	22274919	33125669	18532464	5662880		67345210	67998149	66493778	73913334	71298873		8335365	9912323	8810608	10210861	17314974
	23007172	28709382	22305380	34298744	19542312	5664107		67380086	68136668	67187947	74427326	71632507		8429093	9963294	8848897	10444300	17901208
	23073204	29098524	22319269	34686661	19729800	5688237		67524279	68479975	68116560	74611911	71806134		8472830	10000754	8904792	10542402	18418410
	23110131	29315690	22714073	35460337	19905108	5766631		67846879	69298478	68179677	75339265	72204490		8545998	10024511	9148755	10580507	18466647
	23146766	29822633	22960441	36801626	19950647	5775478		67882189	71533718	68739027	76015167	72947715		8567548	10211906	9322607	10918908	18799487
	23417878	33639246	23626781	36879161	20441879	5800749		68767459	71897023	68843048	77129304	75121990		8618784	10243536	9364527	11618779	18817571
	23635981		23846906	37652760	20470191	5880002		69344173	72263168	69057435	78615338	76243252		8728735	10309077	9374645	11672568	19016744
	23726393		23925683	38202016	20500117	5883934		69656781	72442241	69606343	79524689	77512762		8847421	10569452	9388396	12059551	19100197
	23877653		24200319	40975243	20742620	5984716		69763264	73565672	69653617	80767008	78828213		8858569	10589880	9471058	12817138	19465688
	24648239		24403350	41266283	21359458	6005570		69829590	73702621	69674074	80787908	81961437		8979655	10646927	9588777	12824445	20654932
	24847655		24462516	41488645	21632708	6009122		70859173	74069840	69857763	82034042	82446551		9057757	10729243	9590598	12844624	21085831
	25139407		25916841	43158701	21974105	6037353		71026360	74074671	70774018	82064809	83296785		9191276	10799223	9683563	13801584	21286632
	25861794		26101527	44109287	22043750	6067427		71252153	74344213	71087502	82680846	88217056		9379230	10808724	9738047	13824067	21329826
	25894805		26121024	45012956	22299835	6118192		71327238	75493976	71125048	83550847	89869191		9408754	11050044	9839538	13918488	21440882
	26359332		26127803	45081668	22601996	6124154		71683175	76684152	71351430	83763805	92483008		9469138	11535266	9856377	14088234	22037241
	27257146		26508934	46014984	23404707	6188022		72027573	77276491	71486329	84142296	92878307		9522831	11563967	9873144	14490972	22126478
	27757023		26523695	46452446	23571516	6195022		72038284	78109818	71607457	84386964	94329548		9650031	11694696	9904245	14542913	22466476
	27801372		27136834		24037001	6196034		72150438	79020472	72184297	85038480	99917278		9685342	11757667	10058667	14616110	24718764
	28592350		27251689		24425814	6290220		73031590	79543256	72213786	85867938	101367601		9755029	11911044	10071671	14768945	25031248
	28867289		27279040		25017862	6581160		73615001	79706018	74172131	86282283	103058457		9759254	11915464	10133984	15267566	25077941
	28952351		27288604		25254747	6630166		74885605	79819935	74849565	86954807	104372774		9779597	12236935	10299710	15510648	25814526
	29037578		29599305		25291796	6739980		77116902	79860832	76338918	88304770	107349098		9913598	12480793	10429238	15626835	27395103
	29128006		30171074		25773123	6760291		77129792	80233201	76687862	88653006	107524518		9942978	12667002	10549942	15632447	27854949
	29182174		30965398		26264057	6811982		77164073	81508382	77387161	89128887	122780795		10309932	12786562	10619804	15760288	28529905
	29347518		31553245		26739765	6814559		77452009	82513889	79201292	89183266	127177281		10448707	12795827	10705738	16028661	30262956
	29709070		31559566		27494052	6843512		78310843	82831684	79888991	90610589			10518684	13043693	11377967	16286555
	31204993		33374348		28559620	6851577		79541824	83446781	80865451	92525024			11056336	13728153	11554110	16416326
	31208756		34503800		33397562	6902840		79838042	83564438	81186115	102910895			11349752	13891439	11661368	16860884
	32029948		35708195		37215487	7209718		80244466	84347546	82680427	104402532			11353143	14323955	11817158	17807409
	33157072		37513104			7430546		81210711	84399227	82821110	108452873			11406799	14586259	11834493	18058235
	33297255		38233038			7645636		82771937	84641856	83906021	110996662			11705918	15168648	12150163	20669948
	35253596		41387050			7911494		84302719	84812216	85704260	114053498			11840375	15659167	12991508	22220761
	35434460		42778528			7940299		84754532	87461867	92308387	121692290			11903700	15749001	14260497	26257121
	39128156		45255650			7942022		86994492	87601215	92977722	126095548			11966275	15752040	14825995	27211888
	41267331		47878454			7973709		88665810	87747411	94539651				12124803	16234179	15515001
	42281321		52671553			8069377		90489500	87892986	101734437				12150960	16455416	15552408
						8081230		91438056	88531599	103585155				12476368	16979704	17057692
						8389063		91649945	89498009					12987574	17223457
						8677818		94297283	90322472					13307506	17590547
						8977591		96025108	90439256					13415583	17600727
						9198417		96814765	91271513					13491008	17761859
								97670037	91977897					13965243	17876877
								99997973	92758269					14045188	18096556
								102269013	93562119					14731954	18698301
								109161153	94952584					14911022	18819947
								112040042	97323027					14928679	19036522
								112867154	97451532					15690025	19224758
								113381418	98155580					15992892	19812566
								113458686	100008043					16156612	19964077
								117465541	107158355					17610568	20578444
									108192379						23186737
															24945092
	4677870	1968641	1731516	7125256		1172037		21307941	17286897	17260813	22826896			3417115	2133911	5625833	5030476
	4750073	2641376	3512343	7831919		1495478		23543326	22318432	22490632	24604423			3521982	3031576	6398494	6531793
	5400368	2725816	4077389	7977183		3967216		26665138	24739282	23121130	24941904			3602490	4681209	8351346	6865548
	5890420	4175105	5304813	8116594		4537228		27994735	24831920	29978203	31187335			3951579	4975395	8929960	7062795
	6163927	4261467	5628446	8553768		4606963		28459392	25045161	31225928	33348609			4107889	4978370	10193643	7162902
	6178607	4588975	5649909	8609314		4646975		28570252	26786552	31921045	35148827			4414167	5486056	10691373	8131725
	7117479	4843357	6043671	8691606		4829789		29087010	26814805	33393426	35807059			4823191	5589656	10913167	8176001
	7560269	5048873	6341909	8894610		4844422		29583047	27074830	33959686	35855283			4911724	5604618	10926595	8418909
	8051931	5187390	7125334	9189935		4846539		30616759	27346198	35345583	37176221			6142821	5679185	11131419	8772925
	8090020	5230039	7251020	9322819		4933454		33658677	27602441	36770604	39371949			6202200	6233369	11270930	8977686
	8116592	5368898	7313959	9698324		5215082		33954140	28049510	36972223	39588211			6353002	6415219	11364603	9366916
	8245391	5790313	7630208	9739057		5784396		35347937	28077625	37197330	39902749			6624244	7142229	11425162	9372653
	8507845	6058259	7669556	9796523		6268894		35437855	28807620	37788466	40473458			6626843	7619561	11656765	9671065
	8631365	6251743	7677101	10026179		6290361		35756012	28986058	39044775	40737621			6770167	7797057	12014540	9714913
	8682801	6299839	7698181	10203938		6419304		36761539	29007974	41028874	41242581			7018327	8022915	12074034	9808164
	8861361	6310938	8022349	10208896		6421917		37756868	29802773	41730429	41455712			7173021	8071507	12105432	9811570
	9039656	6450317	8269251	10358981		6710289		37792593	30225160	41932469	41495136			7318140	8092505	12144588	9967460
	9162977	6657756	8472105	10717681		7664139		39013406	31358096	42544714	41510709			7540972	8141440	12181069	10252075
	9262950	6814709	8563702	10782098		8264572		39053001	31522813	42559932	41697314			8051957	8165780	12305318	10423514
	9574966	7018091	9010912	10989388		8348899		39151459	31687056	43291291	41920505			8080733	8214747	12353225	10423514
	9653544	7277036	9398534	11263900		8675241		39476610	31712691	43382616	42495954			8107680	8296743	12417043	10496688
	9802308	7300015	9440638	11313397		9171770		40966230	32691145	44105457	42673793			8154325	8476456	12437594	10723179
	9825923	7444780	9581388	11489338		9766556		41615343	33932988	44508963	43255396			8170188	8485683	12460847	11027957
	9840976	7512083	9655310	11513526		9943252		41672663	34036510	44650651	43389942			8257789	8498544	12516433	11130474
	9866673	7671602	9938208	11579410		9950341		41856083	34191144	45178694	43389942			8346373	8710459	12851187	11309257
	9978435	7691827	10007885	11644326		10037270		42143441	34201690	45205510	44120634			8567359	8733677	13218841	11714373
	10018689	7754538	10574246	11677489		10256248		42304894	35655917	45921175	44964332			8678763	8897975	13317207	11949225
	10042392	8071306	10626651	12143804		10905843		42446219	35657286	46126404	45125238			9556921	9403523	13326671	12195589
	10042653	8081752	10788189	12248516		10968860		43117041	35724672	47581203	45385236			9567121	9544892	13737014	12225076
	10227881	8273556	10978418	12261973		11430838		43182135	35888374	48454766	45415741			9671919	9575256	13873824	12374745
	10424364	8278063	11150514	12288555		12160003		43699516	36807822	48736362	45673694			9695919	9583720	14073825	12542572
	10580013	8284337	11256445	12560099		12404996		43746555	37567874	48904728	46551730			9716525	9600505	14410466	12576906
	10650695	8287047	11408347	12561516		12589218		43816567	37776937	49105587	46723778			9990592	9922465	14575685	12605293
	10673607	8334822	11627047	12596609		13655748		43916659	37987767	49329859	46983724			10074354	9978495	14875098	12631855
	10773217	8390114	11690458	12809492		14580915		44902036	39032035	51394939	47957920			10212840	11101236	14941987	12660142
	10834026	8444775	11979835	12870995		15016346		45758079	39588797	51579170	48244105			10343937	11209737	15132511	12854433
	10918667	8669078	12487018	12995355		15650038		45784007	39783723	51943772	48468470			10508388	11267800	15535295	12951048
	10935436	8672768	12666641	13154018		16025759		46670234	40006767	52426826	48911162			10763253	11331456	15995978	13084726
	11011000	8737473	12736959	13155686		16486469		46800651	40173575	52690594	49683891			10883202	11385732	16151410	13142557
	11057577	8748273	12853271	13312935		16900788		47185601	40447532	52874891	50151941			10936281	11471894	16169969	13183077
	11123008	8826093	13083967	13329981		17767316		47467387	40603056	53002102	50278642			11248704	11864296	17625549	13220296
	11201595	8959238	13221511	13413044				47890040	41249687	53871402	50343706			11312426	11865285	17745959	13235748
	11325240	9010530	13432210	13494487				47905161	41475833	55408700	50443723			11373810	11877745	17972255	13561075
	11498252	9166076	13501499	13539068				48148482	41769379	56920207	50490671			11390923	12067526	18220587	13590489
	11570946	9251323	13979442	13868280				48243306	42867044	57534543	50537660			11596118	12245905	18750990	13678810
	11588972	9547823	13991577	13985093				48316451	43262272	57738740	50781214			11922889	12332211	18756937	14002965
	11884140	9702819	14317595	13986352				48403631	44040598	58217237	50837075			12031676	12450680	18854119	14239330
	11968296	9717594	14686725	14330823				48838206	44509505	58530083	50842951			12081080	12839741	18921767	14252722
	11986570	9719147	14836640	14490141				49148064	44685939	58724086	51098608			12220678	12961166	19198459	14293067
	12090670	9762305	14924194	14507213				49334015	44840654	60409852	51197641			12233762	13390678	19414648	14322425
	12292631	9944637	15611531	14579577				49478776	44939160	61492766	51405959			12276774	13427550	19714222	14480599
	12298131	9976424	15681869	14759832				49570357	45911436	62495148	51898083			12303470	13441508	19765143	14517785
	12334017	9983177	15995949	14895385				50042077	46801684	63807237	51950614			12311264	13453312	19793062	14601037
	12487199	10006721	16554669	15263952				50058981	46857211	65687944	51957803			12334810	14507915	20026763	14644161
	12786813	10024477	16678512	15479212				51394298	47081702	66089202	52048097			12392037	14635379	20533208	14719802
	12909926	10028946	16877843	15534621				51728510	47254586	66187821	52506142			12537675	14651622	20562186	14884663
	12934147	10141647	16887044	15841500				52079087	47580043	66450761	52533213			12559399	15130670	20999729	14913887
	13103774	10200766	16950641	16052460				52140370	48275488	67985779	52810959			12577638	15242108	21212314	15065777
	13257374	10234635	17195147	16093974				52185315	48321127	68361848	53737125			12628739	15772941	21733117	15066600
	13596428	10362273	17224514	16334163				52206055	48541879	68411982	54052122			12814009	15937471	22145694	15190067
	13604397	10439816	17571581	16615349				52729959	48861211	68842514	54342149			13066927	16086434	22814680	15373599
	13663944	10486119	17648906	16710983				53650375	50960256	69454995	54715126			13081659	16091162	23499798	15421273
	13666918	10490544	17747301	16884191				53755544	52079600	69691735	55069605			13127260	16865878	25331182	15427357
	13674779	10533346	17954384	16899344				53864548	53487675	70214896	55164318			13132823	17030001	25508058	15522342
	13745590	10684263	18204369	17112260				53965941	54877665	70615660	56065795			13164529	17169558	25838814	15676869
	13757237	10892034	18517050	17416368				55218990	55746184	71410419	56322481			13531466	17341025	26304185	15892536
	13797727	10998000	18577143	17562337				56726724	56536317	73040352	56811447			13649362	17407777	26479151	15924110
	13913862	11069687	18670810	17812157				56758486	56767978	74086467	57063546			13771318	17773183	26532472	15965147
	13973221	11100288	18713108	18010681				57304262	58004576	74968254	57254224			14546467	17953345	27343245	15981567
	14170084	11126139	18755155	18213368				57616166	58417781	75131224	57670233			14604727	17970033	27932374	17153068
	14328068	11161915	19223841	18461860				57733850	59075790	75676457	58801761			14860200	18282204	27967165	17588300
	14446642	11275098	19264731	19098265				58004406	59554949	76418509	59247203			14982986	18560423	29013794	17614193
	14549798	11286168	19496055	19121431				58670272	61060104	77896011	61110948			15372135	18576276	29189209	18377975
	14817481	11295682	19752457	19331399				59037602	61262625	82045973	61620073			15398914	18698582	29190199	19436533
	14906014	11396480	20213318	19361600				61538514	62685220	83120443	61646891			16028848	18929206	29307046	19939978
	15132087	11417170	20751345	19536550				61700223	64593097	84474717	61811324			16751836	19042015	30468461	20672487
	15243849	11609789	20943333	19895353				61887272	68073344	88188498	63759011			17017898	20475306	31189313	20753716
	15250978	11629034	21290222	19898137				62465976	68093680	90047777	64566257			18248007	21762550	31341060	20808535
	15293634	11866888	21388665	20411414				63121360	68430596	92480473	65086853			18887673	22822245	33586932	22060286
	15637430	11990836	21605189	20451816				63277442	69573027	111946347	67051674			19084549	22969724	45203399	22372248
	15809831	12081160	21844840	20620719				63986638	69588412		67345338			19332047	24194480		22786773
	15910392	12196547	21926481	21045100				64022697	70842555		69665835			19362068	25091512		23226077
	16437707	12471564	22096492	22463937				64303471	74605420		75018282			20530695			27047220
	16474070	12563487	22162923	22642626				64490803	83140481		77561996			20627504			34471429
	18159062	12983209	22225090	22753512				68623588	109979617		86458403			21223183			37347067
	18223591	13004699	22834557	22948343				71339221						21232337
	18322948	13122562	23377873	23903793				73385947						21717510
	18682718	13245584	23663722	24453013				74250090						22849959
	19347419	13282006	23784760	24522817				75230856						23047918
	19465881	13294550	24436272	24744913				80749376						25842529
	19540883	13773851	24537776	25930916				81094163						26362836
	19654285	13987196	24572967	28883596				81940274						28183310
	19921041	14050531	24776572	29542432
	20092275	14134550	25422310
	20186964	14193987	26280399
	20270449	14623668	27757347
	21937852	14682101	28372841
	22827373	14783639	28809838
	23777536	15063525	28933656
	25433256	15432722	29222928
	26914197	15449720	29990584
	27227633	15621544	30349855
	28769051	15924480	31372171
	29235566	16114004	32948085
	30015224	16365020	34333927
		16365941	36082073
		16391209
		16579011
		18448750
		19114687
		19655646
		19664739
		21274965
Moyenne	1.74837e+07	1.3449e+07	1.89048e+07	1.99835e+07	1.64523e+07	6.36509e+06		5.92315e+07	5.79996e+07	5.94878e+07	5.9065e+07	6.29744e+07		1.03207e+07	1.14498e+07	1.29297e+07	1.23202e+07	1.54614e+07
SD	7.40353e+06	6.19284e+06	8.59534e+06	9.06675e+06	6.48259e+06	3.26934e+06		1.86608e+07	2.0263e+07	1.65961e+07	1.8643e+07	2.29259e+07		4.6648e+06	4.93363e+06	7.34904e+06	5.29118e+06	5.71712e+06
SEM	528824	469478	612393	705845	707308	279319		1.32953e+06	1.46618e+06	1.26544e+06	1.41332e+06	2.56319e+06		332353	358869	560359	401123	639193
Par rapport à NoUV
Moyenne	100	76.9228	108.128	114.297	94.1007	36.4058		100	97.9202	100.433	99.7188	106.319		100	110.94	125.28	119.374	149.81
SD	42.3452	35.4205	49.1619	51.8581	37.0778	18.6993		31.5048	34.2098	28.019	31.4748	38.7055		45.1986	47.8034	71.207	51.2678	55.3948
SEM	3.02466	2.68522	3.50264	4.03715	4.04552	1.59759		2.24463	2.47534	2.13643	2.3861	4.32741		3.22027	3.47719	5.42948	3.8866	6.19333
variance	5.45326e+13	3.81308e+13	7.35049e+13	8.17077e+13	4.15236e+13	1.06106e+13		3.46458e+14	4.0844e+14	2.73828e+14	3.45564e+14	5.19026e+14		2.16499e+13	2.42119e+13	5.36943e+13	2.78357e+13	3.22769e+13
t.test		2.39161e-08	0.0798283	0.00488883	0.244412	3.51159e-51			0.534042	0.88905	0.931632	0.197312			0.0215134	7.95006e-05	0.000147088	7.12453e-11
		***		**		***									*	***	***	***

## Sheet: Moy par rapport à NoUV
	PLA							IF XAB2						IF XPB
	No UV	1h	2h	4h	16h	XAB2-GFP		NoUV	1h	2h	4h	16h		NoUV	1h	2h	4h	16h
	35.9939	28.4707	37.8404	51.745	26.6821	9.64735		56.8972	50.5771	49.1989	40.644	31.3874		40.2942	44.0131	46.0925	38.7399	72.6051
	40.0784	35.2338	40.6596	54.14	28.1158	10.568		58.2699	60.0495	52.5182	47.1362	36.178		42.4408	44.4506	47.055	54.4056	78.7843
	44.356	37.4073	45.2931	60.537	30.5822	11.2261		59.55	61.5927	52.9208	53.1416	37.4324		49.5343	45.9125	47.1126	56.1802	79.0947
	56.0828	43.196	46.8872	60.8271	33.4784	11.4151		60.0909	62.3829	59.1975	57.1947	37.7832		51.2731	47.5726	49.3634	57.7634	79.7758
	57.2823	50.1481	47.3187	61.375	35.9501	12.4207		61.8732	62.5221	60.4914	58.1182	38.0662		52.1937	47.8529	49.634	59.7541	83.4268
	59.8298	51.2714	51.9473	67.2811	35.9614	12.4941		62.6324	65.8325	61.4843	59.0048	40.7509		52.4885	49.0643	50.0709	60.4933	87.8003
	60.0647	53.9734	52.9861	68.8775	36.1744	12.9152		62.9231	66.9631	61.5725	61.9926	47.0462		54.0117	49.4864	50.4217	61.3094	89.9814
	62.5404	56.7795	53.3185	70.9086	36.6775	12.931		66.4625	68.0121	64.0799	66.4516	48.8697		54.0426	50.0724	54.0191	64.0885	93.0946
	63.1441	57.6605	55.3084	72.7557	37.0176	13.0524		66.8601	68.0903	65.896	69.6639	50.9567		54.1787	51.5859	54.8925	65.5854	94.0959
	63.9237	58.3765	55.5413	74.6402	39.1817	14.0332		68.3383	68.8364	67.076	70.6409	52.5942		56.1689	52.4511	55.823	67.3427	94.6885
	65.1275	58.4674	56.0527	75.2691	42.7543	14.3673		70.1025	69.5815	67.1492	71.3753	57.7925		58.4234	59.7295	59.2788	74.8557	95.3139
	66.3572	59.0982	58.3916	76.2423	42.9058	14.4429		70.1931	70.0309	67.8755	71.8321	59.6062		59.0586	63.4622	60.1653	75.3402	102.584
	70.4112	61.3865	61.6594	76.7841	43.8499	14.8033		70.3276	70.4759	68.1229	72.6151	60.7264		59.136	64.8571	60.7026	79.8145	105.002
	73.739	62.0949	61.7967	78.0963	43.951	15.6798		70.5533	72.7149	68.505	73.3445	60.9909		59.9298	67.1838	60.9465	80.1885	106.403
	74.104	62.6894	62.2925	78.5374	43.9823	15.8485		71.3785	73.3677	68.5513	74.1078	64.3659		61.7175	73.1748	62.4537	81.1595	111.016
	74.2058	63.6938	62.8984	82.4856	46.8575	16.3532		71.5723	73.779	69.2349	74.781	64.9401		62.1684	76.6453	63.3641	81.9375	111.723
	74.6937	69.2202	63.4454	83.1949	47.3722	16.384		72.0156	75.9757	69.6569	75.8551	66.9715		62.2846	79.8176	64.016	82.104	112.511
	75.1028	74.0442	63.718	86.3497	48.3328	16.4797		73.8447	76.2521	71.992	75.9703	71.1533		62.8803	80.4786	64.4114	82.3608	118.291
	75.8496	74.2194	63.8989	89.3175	48.4929	16.5627		74.4968	76.689	72.3031	76.011	71.5451		63.401	80.9646	66.0573	83.5568	120.176
	76.5036	74.6846	64.1737	90.2442	49.6321	16.6678		74.7527	77.4922	72.9952	77.1316	72.913		63.4625	82.4932	68.0271	83.8718	125.543
	78.2496	77.5015	67.6907	91.6519	52.7236	16.8238		74.7698	77.7247	73.3038	77.4346	73.513		63.5678	82.7424	68.1627	84.0391	128.931
	79.3295	77.6508	68.4318	93.2755	53.3072	17.251		75.471	78.6467	74.2347	77.9157	73.8971		64.0815	83.7158	68.8303	84.5883	130.811
	79.7535	78.0448	71.5873	95.0817	54.7846	17.3681		77.1437	79.1619	75.1011	78.9592	73.9876		66.1648	85.1588	72.5715	84.7839	132.287
	79.9294	78.5388	72.7341	95.7716	54.9408	17.607		77.2405	79.5757	75.2881	79.0155	75.1931		66.7603	85.4452	73.8676	86.648	139.208
	80.124	79.2835	74.8035	95.8215	55.8945	17.8976		78.8413	79.9298	76.2105	79.7712	76.7103		72.0854	85.9072	74.7156	86.9156	146.461
	81.0892	79.5975	75.4059	97.79	56.6407	18.0057		79.1958	80.5268	76.6606	79.8394	76.8093		72.4584	86.7633	75.3711	86.9516	146.825
	82.4696	81.5036	75.8405	97.8462	56.6907	18.3613		79.6978	81.9213	77.3518	81.1593	77.233		73.9072	87.4828	75.8393	87.0964	148.958
	82.8554	82.4016	76.492	99.3116	58.2505	18.4739		81.3714	83.8592	77.753	81.4799	77.8177		74.0121	87.967	76.3449	88.488	152.637
	83.0039	84.4373	76.5189	100.41	59.1066	19.2015		81.4801	84.361	77.887	81.5493	78.0018		74.0358	88.5534	77.4563	89.5508	153.618
	84.7029	85.2442	76.6101	101.257	60.397	19.2328		81.9971	84.8963	78.0528	82.019	80.3668		74.0812	90.4409	78.2192	90.682	153.79
	84.7553	87.7274	78.7908	102.629	61.033	19.316		82.2326	85.7977	78.3328	82.0765	81.4828		76.7433	91.5238	79.0632	94.9077	156.511
	85.3321	88.1213	81.6386	106.271	61.7331	19.4506		83.8337	86.1116	78.9581	82.278	82.2777		79.579	92.0398	79.162	96.5035	159.039
	88.0846	88.1268	81.9356	107.047	62.4119	19.4769		84.254	86.2542	80.0826	82.8266	85.9657		80.5868	93.5144	79.3089	97.4756	162.038
	88.9961	88.778	83.1482	108.732	63.2059	19.6967		84.2922	86.692	82.2517	83.1301	86.6798		81.2029	94.2642	79.313	98.1719	162.493
	89.5031	88.8714	84.0139	109.329	63.5751	19.8188		85.0269	87.382	82.9088	84.7941	87.3067		82.9046	95.2618	80.2483	98.6283	163.069
	89.7764	89.1574	84.8499	109.331	63.9606	20.6853		85.5723	87.6383	83.8381	85.1174	87.7049		83.0615	96.673	81.4835	98.7212	163.829
	89.8702	91.2935	86.7552	110.253	64.0371	20.7256		85.6821	87.7205	85.4729	85.5209	87.9405		85.9501	96.9152	83.4488	99.5741	164.021
	90.1271	92.2532	87.2145	110.971	65.1027	20.8105		87.1364	88.2051	85.6264	86.0881	88.1826		86.138	98.062	85.674	100.063	172.49
	90.2215	94.5997	88.3216	111.077	66.2941	21.2569		87.6329	88.3034	86.6531	86.942	88.8473		87.1606	98.1265	87.315	100.331	172.746
	90.8974	95.4234	88.8219	114.511	67.4101	21.3323		87.7844	89.8176	88.2246	87.5372	89.4714		87.3465	98.9895	88.3402	100.333	173.742
	92.0534	96.5557	88.9792	115.108	70.3422	21.4791		87.8519	89.9688	88.7389	88.0272	89.4798		87.6855	99.2105	88.3654	100.568	174.856
	92.0815	96.8331	89.0545	119.024	71.4602	21.7766		89.9053	90.8188	89.7009	89.1673	89.5411		88.0395	99.6348	88.7072	101.147	175.028
	92.8171	97.6578	90.3243	120.137	72.6518	21.9121		90.0178	92.1108	90.5657	89.4298	90.2246		88.0482	99.8748	89.3138	103.333	178.52
	93.1572	101.298	90.4909	121.951	73.0498	22.1826		90.9502	93.4227	90.846	90.2655	90.4378		88.386	102.547	91.7257	104.253	181.378
	93.8194	101.445	91.6014	122.592	74.0469	22.2241		91.5664	93.929	92.673	90.2842	90.6419		88.6162	102.955	92.6036	104.453	183.587
	94.1387	101.969	91.6041	123.139	74.1091	22.2432		92.6542	94.1201	92.9455	92.2179	91.1396		90.2304	103.04	92.719	105.216	185.3
	94.7584	102.508	91.9549	128.607	75.261	22.3624		93.3824	94.8571	93.492	96.6992	93.0335		90.2981	103.693	93.651	105.72	188.579
	94.9143	102.807	92.5287	129.298	76.8035	22.4051		93.6138	95.6408	93.5602	97.4444	93.1031		91.0207	103.906	95.0779	106.035	188.864
	95.318	104.06	93.1213	133.348	77.3815	22.4502		94.2309	96.5984	93.5851	100.523	94.114		91.2796	105.117	95.2833	106.727	190.482
	95.8227	108.842	93.3939	134.659	78.4264	22.7169		94.5487	97.7888	95.282	100.596	94.8352		92.6472	106.344	97.785	108.799	191.437
	96.3954	112.169	93.4609	137.363	79.731	22.8615		95.0794	97.8944	95.5635	102.331	95.1248		92.8131	107.708	97.823	108.855	193.518
	101.128	113.257	96.9017	141.888	81.7103	23.6191		95.2033	98.0638	95.9945	103.581	95.336		93.6004	109.404	98.6094	109.001	194.164
	101.187	113.821	98.6755	144.626	81.7817	23.7238		95.874	98.8738	96.7868	105.69	97.4072		93.9175	109.777	99.4548	110.543	195.661
	101.583	122.101	98.8376	144.986	82.2924	24.67		97.1601	99.0648	96.8767	105.812	100.503		95.0884	111.742	99.6708	112.758	195.666
	101.598	127.231	100.09	149.591	83.2832	24.7807		98.0066	99.9904	97.7204	106.852	103.68		95.2227	112.614	100.534	115.221	199.174
	104.33	129.695	101.187	150.478	84.1863	25.7244		99.1618	100.123	97.9081	108.833	104.983		96.0141	114.179	101.488	117.618	199.449
	104.513	130.416	101.325	155.807	88.7737	25.73		99.2132	100.327	98.9302	109.59	105.475		97.0938	114.766	101.929	120.307	206.202
	104.813	132.184	101.388	157.569	89.6254	25.8396		99.4255	100.833	100.298	109.862	105.73		97.5976	115.198	102.573	121.437	212.16
	104.981	133.171	103.182	161.084	90.4217	26.1957		99.9005	102.038	100.391	110.933	106.317		98.4404	115.471	105.383	121.876	212.715
	105.147	135.473	104.301	167.177	90.6286	26.2359		99.9525	105.329	101.214	111.928	107.411		98.6886	117.63	107.386	125.774	216.549
	106.379	152.811	107.328	167.529	92.8601	26.3507		101.256	105.864	101.367	113.568	110.613		99.2788	117.994	107.869	133.835	216.757
	107.37		108.328	171.043	92.9887	26.7107		102.105	106.403	101.683	115.756	112.264		100.545	118.749	107.985	134.455	219.052
	107.78		108.686	173.538	93.1247	26.7286		102.565	106.667	102.491	117.095	114.133		101.912	121.748	108.144	138.913	220.013
	108.468		109.933	186.136	94.2263	27.1864		102.722	108.321	102.561	118.925	116.07		102.041	121.984	109.096	147.639	224.223
	111.968		110.856	187.458	97.0283	27.2811		102.82	108.523	102.591	118.955	120.683		103.436	122.641	110.452	147.723	237.922
	112.874		111.124	188.468	98.2696	27.2973		104.336	109.063	102.861	120.79	121.398		104.335	123.589	110.473	147.956	242.885
	114.199		117.731	196.054	99.8205	27.4255		104.582	109.071	104.211	120.836	122.65		105.873	124.395	111.544	158.979	245.198
	117.481		118.57	200.373	100.137	27.5621		104.915	109.467	104.672	121.743	129.894		108.038	124.504	112.171	159.238	245.696
	117.631		118.658	204.478	101.3	27.7927		105.025	111.16	104.727	123.024	132.327		108.378	127.284	113.341	160.326	246.975
	119.741		118.689	204.79	102.673	27.8198		105.549	112.913	105.061	123.337	136.176		109.074	132.873	113.535	162.281	253.845
	123.819		120.421	209.03	106.319	28.11		106.056	113.785	105.259	123.895	136.758		109.692	133.204	113.728	166.92	254.872
	126.09		120.488	211.017	107.077	28.1418		106.072	115.012	105.438	124.255	138.895		111.158	134.71	114.086	167.518	258.789
	126.292		123.273		109.191	28.1464		106.237	116.353	106.287	125.214	147.122		111.564	135.435	115.865	168.361	284.733
	129.885		123.795		110.958	28.5742		107.535	117.123	106.33	126.435	149.258		112.367	137.202	116.014	170.122	288.332
	131.134		123.919		113.647	29.8958		108.394	117.362	109.214	127.046	151.747		112.416	137.253	116.732	175.865	288.87
	131.52		123.962		114.723	30.1185		110.265	117.53	110.212	128.036	153.683		112.65	140.956	118.641	178.665	297.355
	131.907		134.459		114.892	30.6173		113.55	117.59	112.405	130.024	158.065		114.194	143.765	120.133	180.004	315.561
	132.318		137.056		117.078	30.7096		113.569	118.139	112.918	130.536	158.323		114.532	145.91	121.524	180.068	320.858
	132.564		140.665		119.308	30.9444		113.619	120.016	113.948	131.237	180.787		118.759	147.287	122.328	181.541	328.633
	133.315		143.335		121.469	30.9561		114.043	121.497	116.619	131.317	187.261		120.357	147.394	123.318	184.632	348.596
	134.958		143.364		124.896	31.0876		115.308	121.965	117.632	133.419			121.164	150.249	131.062	187.603
	141.753		151.608		129.736	31.1243		117.121	122.87	119.07	136.238			127.357	158.133	133.091	189.098
	141.77		156.738			31.3571		117.557	123.044	119.542	151.53			130.737	160.014	134.326	194.219
	145.501		162.209			32.7512		118.155	124.197	121.742	153.726			130.776	164.996	136.121	205.122
	150.621		170.409			33.7543		119.578	124.273	121.949	159.69			131.394	168.017	136.32	208.011
	151.257		173.679			34.7314		121.877	124.63	123.547	163.436			134.839	174.726	139.956	238.095
	160.144		188.006			35.9391		124.131	124.881	126.194	167.937			136.388	180.376	149.648	255.958
	160.966		194.327			36.0699		124.796	128.782	135.919	179.185			137.117	181.411	164.265	302.453
	177.745		205.58			36.0778		128.094	128.988	136.904	185.668			137.838	181.446	170.779	313.451
	187.463		217.495			36.2217		130.555	129.203	139.204				139.664	187	178.716
	192.069					36.6563		133.24	129.417	149.798				139.966	189.548	179.146
						36.7101		134.637	130.357	152.523				143.714	195.587	196.486
						38.1085		134.949	131.78					149.602	198.395
						39.4202		138.847	132.994					153.288	202.624
						40.782		141.391	133.166					154.533	202.741
						41.7851		142.554	134.392					155.401	204.597
								143.813	135.432					160.864	205.922
								147.241	136.581					161.785	208.452
								150.585	137.765					169.696	215.384
								160.733	139.812					171.758	216.785
								164.972	143.302					171.962	219.28
								166.19	143.492					180.732	221.448
								166.947	144.528					184.22	228.219
								167.061	147.256					186.106	229.964
								172.961	157.784					202.854	237.041
									159.307
	36.5056		13.5126	55.6047		9.14645		43.202	35.0493	34.9964	46.2817			28.0285	17.5031	46.1452	41.2619
	37.069		27.4099	61.1194		11.6705		47.7342	45.2507	45.5999	49.8856			28.8886	24.8661	52.4829	53.5762
	42.1439		31.8195	62.2531		30.9597		54.0637	50.159	46.8782	50.5699			29.549	38.3971	68.5009	56.3138
	45.9682	32.5821	41.3982	63.341		35.408		56.7595	50.3469	60.781	63.2325			32.4124	40.8101	73.2469	57.9317
	48.1026	33.256	43.9238	66.7527		35.9522		57.7016	50.7792	63.3107	67.6145			33.6945	40.8345	83.6121	58.7528
	48.2172	35.8119	44.0913	67.1861		36.2645		57.9263	54.3099	64.7201	71.2644			36.2067	44.9987	87.6947	66.6995
	55.544	37.797	47.1641	67.8283		37.6911		58.9741	54.3672	67.7054	72.599			39.5616	45.8485	89.5139	67.0627
	58.9995	39.4008	49.4916	69.4126		37.8053		59.9798	54.8944	68.8535	72.6968			40.2878	45.9712	89.6241	69.0551
	62.8364	40.4818	55.6053	71.7172		37.8219		62.0757	55.4446	71.6634	75.375			50.3858	46.5828	91.3041	71.9589
	63.1336	40.8146	56.5862	72.7542		38.5001		68.2432	55.9641	74.5526	79.8268			50.8728	51.1285	92.4485	73.6384
	63.341	41.8983	57.0773	75.6846		40.6979		68.8422	56.8705	74.9614	80.2653			52.1097	52.6201	93.2168	76.831
	64.3461	45.187	59.5453	76.0025		45.1408		71.6681	56.9275	75.4178	80.903			54.3346	58.5833	93.7135	76.8781
	66.3943	47.278	59.8524	76.451		48.9218		71.8505	58.4076	76.6163	82.0602			54.3559	62.4985	95.6132	79.3258
	67.3582	48.7879	59.9112	78.2432		49.0893		72.4955	58.7694	79.1635	82.5958			55.5315	63.9544	98.5478	79.6854
	67.7596	49.1632	60.0758	79.6304		50.0955		74.5342	58.8138	83.1863	83.6196			57.567	65.807	99.0358	80.4503
	69.1531	49.2499	62.6055	79.6691		50.1159		76.5523	60.4253	84.6087	84.0517			58.8358	66.2056	99.2934	80.4782
	70.5445	50.3376	64.5323	80.8403		52.3664		76.6247	61.2817	85.0183	84.1316			60.0262	66.3778	99.6145	81.7569
	71.5069	51.9564	66.1154	83.6396		59.8101		79.0999	63.5787	86.2596	84.1632			61.8539	66.7792	99.9138	84.0914
	72.287	53.1812	66.8302	84.1423		64.4958		79.1802	63.9127	86.2905	84.5415			66.0452	66.9788	100.933	85.4976
	74.722	54.7684	70.3202	85.76		65.1539		79.3798	64.2457	87.7733	84.9941			66.2812	67.3805	101.326	85.4976
	75.3352	56.7892	73.3451	87.9022		67.7006		80.039	64.2977	87.9585	86.1608			66.5023	68.053	101.849	86.0978
	76.4961	56.9685	73.6737	88.2885		71.5755		83.0593	66.2815	89.4241	86.5214			66.8849	69.5271	102.018	87.9556
	76.6804	58.0982	74.7721	89.6615		76.2171		84.3753	68.7993	90.2422	87.7006			67.015	69.6028	102.209	90.4555
	76.7979	58.6235	75.349	89.8503		77.596		84.4916	69.0092	90.5294	87.9734			67.7335	69.7083	102.665	91.2964
	76.9984	59.8683	77.5567	90.3644		77.6514		84.8634	69.3227	91.6001	87.9734			68.4601	71.4465	105.41	92.7628
	77.8706	60.0262	78.1004	90.871		78.3297		85.4461	69.3441	91.6544	89.4548			70.2727	71.6369	108.426	96.0857
	78.1847	60.5156	82.5202	91.1298		80.0386		85.7734	72.2926	93.1054	91.1654			71.1865	72.9846	109.233	98.0121
	78.3697	62.9876	82.9292	94.7689		85.108		86.0599	72.2953	93.5215	91.4917			78.3895	77.1313	109.31	100.033
	78.3718	63.0691	84.1898	95.5861		85.5998		87.42	72.432	96.4712	92.0188			78.4732	78.2908	112.676	100.275
	79.8173	64.5659	85.6744	95.6911		89.205		87.552	72.7639	98.2423	92.0807			79.3328	78.5399	113.798	101.502
	81.3506	64.6011	87.0174	95.8985		94.8953		88.601	74.6281	98.8132	92.6037			79.5296	78.6093	115.439	102.879
	82.5652	64.65	87.844	98.0176		96.8072		88.6964	76.1691	99.1546	94.3839			79.6986	78.747	118.2	103.161
	83.1168	64.6712	89.0295	98.0287		98.2449		88.8383	76.593	99.5619	94.7327			81.9466	81.3878	119.555	103.393
	83.2956	65.044	90.7362	98.3025		106.568		89.0413	77.0204	100.017	95.2598			82.6337	81.8474	122.011	103.611
	84.073	65.4755	91.231	99.9639		113.788		91.0391	79.1377	104.204	97.235			83.7696	91.0566	122.56	103.843
	84.5475	65.9021	93.4893	100.444		117.186		92.7748	80.2665	104.577	97.8152			84.8449	91.9465	124.123	105.437
	85.2081	67.6525	97.4473	101.414		122.131		92.8273	80.6617	105.316	98.2701			86.1938	92.4228	127.426	106.229
	85.3389	67.6813	98.8491	102.652		125.063		94.6242	81.1139	106.296	99.1677			88.2843	92.9449	131.205	107.326
	85.9286	68.1863	99.3978	102.666		128.659		94.8886	81.4522	106.83	100.734			89.2682	93.3901	132.48	107.8
	86.2921	68.2706	100.306	103.893		131.892		95.6691	82.0076	107.204	101.683			89.7035	94.0968	132.632	108.133
	86.8027	68.8779	102.106	104.026		138.654		96.2404	82.3229	107.462	101.94			92.2661	97.3155	144.571	108.438
	87.416	69.9169	103.179	104.674				97.0973	83.634	109.225	102.072			92.7888	97.3236	145.559	108.565
	88.3809	70.3172	104.823	105.309				97.128	84.0925	112.341	102.275			93.2923	97.4258	147.415	111.233
	89.7311	71.531	105.364	105.657				97.6213	84.6877	115.406	102.37			93.4327	98.9824	149.452	111.474
	90.2984	72.1963	109.094	108.227				97.8136	86.9132	116.652	102.465			95.1158	100.446	153.803	112.199
	90.4391	74.5102	109.189	109.138				97.9619	87.7145	117.066	102.959			97.7961	101.153	153.852	114.858
	92.7425	75.7197	111.733	109.148				98.1386	89.2926	118.036	103.072			98.6884	102.125	154.649	116.796
	93.3993	75.835	114.614	111.836				99.0197	90.2433	118.67	103.084			99.0936	105.316	155.204	116.906
	93.5419	75.8471	115.783	113.079				99.648	90.601	119.063	103.603			100.239	106.312	157.473	117.237
	94.3542	76.1839	116.467	113.213				100.025	90.9147	122.481	103.804			100.346	109.835	159.246	117.478
	95.9303	77.6068	121.831	113.777				100.318	91.1144	124.677	104.226			100.699	110.138	161.704	118.775
	95.9733	77.8549	122.38	115.184				100.504	93.0857	126.709	105.224			100.918	110.252	162.121	119.08
	96.2533	77.9076	124.831	116.242				101.461	94.8907	129.37	105.33			100.982	110.349	162.35	119.763
	97.4487	78.0913	129.191	119.118				101.495	95.0033	133.183	105.345			101.175	118.999	164.267	120.117
	99.7869	78.2299	130.157	120.798				104.202	95.4584	133.996	105.528			101.644	120.045	168.421	120.737
	100.748	78.2648	131.713	121.23				104.88	95.8089	134.196	106.456			102.839	120.178	168.659	122.09
	100.937	79.1443	131.785	123.625				105.591	96.4688	134.729	106.511			103.017	124.108	172.248	122.329
	102.26	79.6056	132.281	125.272				105.715	97.8788	137.842	107.075			103.167	125.022	173.991	123.575
	103.459	79.87	134.189	125.596				105.806	97.9714	138.604	108.952			103.586	129.376	178.263	123.582
	106.105	80.866	134.418	127.47				105.848	98.4189	138.706	109.591			105.105	130.725	181.647	124.595
	106.167	81.4712	137.127	129.664				106.91	99.0664	139.579	110.179			107.18	131.947	187.135	126.1
	106.632	81.8325	137.73	130.411				108.776	103.322	140.82	110.935			107.301	131.986	192.754	126.491
	106.655	81.867	138.498	131.762				108.99	105.592	141.3	111.654			107.675	138.34	207.776	126.541
	106.716	82.2011	140.114	131.881				109.211	108.447	142.361	111.846			107.72	139.687	209.227	127.32
	107.269	83.3788	142.065	133.542				109.416	111.265	143.174	113.674			107.98	140.831	211.94	128.588
	107.36	85.0002	144.505	135.915				111.957	113.026	144.785	114.194			110.99	142.238	215.757	130.357
	107.676	85.8272	144.974	137.055				115.014	114.628	148.09	115.186			111.957	142.785	217.192	130.616
	108.582	86.3866	145.705	139.004				115.078	115.097	150.211	115.697			112.958	145.782	217.629	130.952
	109.045	86.6254	146.035	140.553				116.185	117.605	151.999	116.083			119.316	147.26	224.28	131.087
	110.582	86.8272	146.363	142.135				116.817	118.442	152.329	116.927			119.794	147.397	229.112	140.696
	111.815	87.1063	150.021	144.074				117.056	119.776	153.434	119.221			121.889	149.958	229.397	144.266
	112.74	87.9896	150.34	149.041				117.604	120.748	154.939	120.124			122.896	152.24	237.982	144.478
	113.545	88.076	152.145	149.222				118.954	123.8	157.935	123.903			126.088	152.37	239.421	150.743
	115.634	88.1503	154.146	150.86				119.699	124.21	166.349	124.935			126.308	153.373	239.429	159.426
	116.325	88.9369	157.742	151.096				124.77	127.095	168.527	124.989			131.475	155.265	240.388	163.555
	118.089	89.0983	161.941	152.461				125.098	130.963	171.273	125.323			137.405	156.19	249.914	169.564
	118.961	90.6015	163.439	155.261				125.477	138.019	178.803	129.272			139.587	167.946	255.827	170.23
	119.017	90.7517	166.147	155.283				126.65	138.06	182.572	130.908			149.677	178.505	257.071	170.68
	119.35	92.6079	166.915	159.288				127.979	138.743	187.505	131.964			154.924	187.197	275.493	180.947
	122.033	93.5752	168.605	159.604				128.295	141.06		135.948			156.539	188.406		183.506
	123.378	94.28	170.475	160.922				129.733	141.091		136.543			158.569	198.452		186.906
	124.163	95.1805	171.112	164.234				129.806	143.634		141.248			158.815	205.81		190.509
	128.278	97.3267	172.439	175.306				130.376	151.263		152.1			168.401			221.852
	128.562	98.0441	172.957	176.701				130.755	168.568		157.257			169.195			282.748
	141.711	101.32	173.442	177.566				139.135			175.295			174.081			306.335
	142.215	101.487	178.198	179.086				144.641						174.156
	142.99	102.407	182.438	186.543				148.79						178.135
	145.798	103.367	184.669	190.829				150.542						187.424
	150.985	103.651	185.614	191.373				152.531						189.048
	151.91	103.749	190.698	193.107				163.72						211.97
	152.495	107.49	191.49	202.362				164.419						216.238
	153.38	109.155	191.765					166.134						231.17
	155.462	109.649	193.354
	156.798	110.304	198.393
	157.537	110.768	205.089
	158.188	114.121	216.615
	171.201	114.577	221.419
	178.142	115.37	224.829
	185.557	117.554	225.795
	198.478	120.435	228.052
		120.568	234.043
		121.909	236.847
		124.273	244.825
		125.752
		127.711
		127.718
		127.915
		129.381
		143.972
		149.169
		153.39
		153.461
		166.027
Moyenne	100	84.3903	111.605	117.291	72.6481	37.7604		100	95.7122	101.289	100.504	92.726		100	112.373	119.282	118.916	178.098
SD	32.2406	27.8797	49.0064	38.778	26.4802	29.137		26.8391	27.0515	29.6869	26.3604	33.757		39.9672	47.4959	51.0907	48.6091	65.8549
SEM	2.33285	2.13202	3.52755	3.03733	2.92425	2.48934		1.9122	1.96252	2.27021	1.99837	3.77415		2.84754	3.47325	3.907	3.68505	7.3628
variance	1034.01	772.734	2389.18	1494.51	692.65	842.768		716.678	727.932	876.158	690.876	1125.29		1589.27	2243.8	2594.99	2349.26	4282.65
t.test		1.20345e-06	0.00639994	8.95282e-06	7.70751e-12	5.56095e-51			0.118441	0.664336	0.85539	0.0881167			0.00616667	8.24806e-05	6.06784e-05	1.22544e-16
		***		***	***	***									**	***	***
