# Supplementary material for: XAB2 dynamics during DNA damage-dependent transcription inhibition
Source: eLife. 2022 Jul 26;11:e77094. doi: 10.7554/eLife.77094 (PMC9436415; doi:10.7554/eLife.77094)
Supplement: Figure 7—source data 1. [file elife-77094-fig7-data1.xlsx]

## Sheet: MRC5 Pol2-GFP siMock NoUV
														average pre bleach														0
background	15														163.723	212.084	210.368	152.687	178.442	139.002	184.189	207.427	167.386	160.186	319.96	160.106
temps	1	2	3	4	5	6	7	8	9	10	11	12		temps	1	2	3	4	5	6	7	8	9	10	11	12		temps	1	2	3	4	5	6	7	8	9	10	11	12	moyenne	ecart	SEM
0	216.423	261.621	261.424	207.166	228.364	194.767	252.481	277.739	224.361	221.298	411.154	211.601		0	201.423	246.621	246.424	192.166	213.364	179.767	237.481	262.739	209.361	206.298	396.154	196.601		0	1.23027	1.16285	1.17139	1.25856	1.1957	1.29327	1.28933	1.26666	1.25077	1.28787	1.23813	1.22794	1.2394	0.0443081	0.0127906
0.021216	211.412	260.029	255.197	197.014	222.649	187.161	242.546	267.553	221.019	212.025	395.607	204.125		0.021216	196.412	245.029	240.197	182.014	207.649	172.161	227.546	252.553	206.019	197.025	380.607	189.125		0.021216	1.19966	1.15534	1.14179	1.19208	1.16367	1.23855	1.23539	1.21755	1.2308	1.22998	1.18954	1.18125	1.19797	0.0331265	0.00956279
0.042432	210.367	251.2	250.96	202.085	225.658	186.878	241.009	262.588	214.023	206.915	392.786	201.174		0.042432	195.367	236.2	235.96	187.085	210.658	171.878	226.009	247.588	199.023	191.915	377.786	186.174		0.042432	1.19328	1.11371	1.12165	1.22529	1.18054	1.23652	1.22705	1.19362	1.18901	1.19808	1.18073	1.16282	1.18519	0.0381386	0.0110097
0.063648	207.413	249.981	247.967	193.191	223.696	182.952	233.608	260.191	209.015	202.218	384.356	200.679		0.063648	192.413	234.981	232.967	178.191	208.696	167.952	218.608	245.191	194.015	187.218	369.356	185.679		0.063648	1.17523	1.10796	1.10743	1.16704	1.16954	1.20827	1.18687	1.18206	1.15909	1.16876	1.15438	1.15973	1.1622	0.0292867	0.00845433
0.084864	204.931	251.797	240.021	193.188	217.424	179.175	231.106	259.008	210.435	199.592	386.649	197.875		0.084864	189.931	236.797	225.021	178.188	202.424	164.175	216.106	244.008	195.435	184.592	371.649	182.875		0.084864	1.16007	1.11653	1.06965	1.16702	1.13439	1.1811	1.17328	1.17636	1.16757	1.15236	1.16155	1.14221	1.15017	0.0315116	0.00909663
0.10608	203.508	247.772	238.814	189.284	216.586	176.233	227.783	257.093	208.04	202.534	383.708	199.466		0.10608	188.508	232.772	223.814	174.284	201.586	161.233	212.783	242.093	193.04	187.534	368.708	184.466		0.10608	1.15138	1.09755	1.06392	1.14145	1.1297	1.15994	1.15524	1.16712	1.15326	1.17073	1.15236	1.15215	1.14123	0.0310374	0.00895972
0.127296	200.607	242.199	243.885	187.358	211.815	176.972	226.849	256.643	207.461	198.726	378.603	195.749		0.127296	185.607	227.199	228.885	172.358	196.815	161.972	211.849	241.643	192.461	183.726	363.603	180.749		0.127296	1.13366	1.07127	1.08802	1.12883	1.10296	1.16525	1.15017	1.16496	1.1498	1.14696	1.1364	1.12893	1.1306	0.0294593	0.00850416
0.148512	199.171	246.384	239.903	189.659	218.415	181.197	226.296	254.093	205.925	196.492	376.345	195.352		0.148512	184.171	231.384	224.903	174.659	203.415	166.197	211.296	239.093	190.925	181.492	361.345	180.352		0.148512	1.12489	1.091	1.06909	1.1439	1.13995	1.19565	1.14717	1.15266	1.14063	1.13301	1.12934	1.12645	1.13281	0.0311988	0.00900632
0.169728	200.452	244.207	239.079	186.775	210.631	175.784	224.95	251.298	206.865	198.361	375.445	191.512		0.169728	185.452	229.207	224.079	171.775	195.631	160.784	209.95	236.298	191.865	183.361	360.445	176.512		0.169728	1.13272	1.08074	1.06518	1.12502	1.09633	1.15671	1.13986	1.13919	1.14624	1.14468	1.12653	1.10247	1.1213	0.0286544	0.0082718
0.190944	201.57	240.514	237.037	188.311	213.911	171.885	228.338	251.751	203.294	195.128	371.071	192.162		0.190944	186.57	225.514	222.037	173.311	198.911	156.885	213.338	236.751	188.294	180.128	356.071	177.162		0.190944	1.13955	1.06333	1.05547	1.13508	1.11471	1.12866	1.15826	1.14137	1.12491	1.12449	1.11286	1.10653	1.1171	0.0304282	0.00878388
0.21216	196.124	243.273	238.002	180.488	212.259	175.145	230.608	247.066	205.025	191.769	365.629	190.227		0.21216	181.124	228.273	223.002	165.488	197.259	160.145	215.608	232.066	190.025	176.769	350.629	175.227		0.21216	1.10628	1.07633	1.06006	1.08384	1.10545	1.15211	1.17058	1.11878	1.13525	1.10352	1.09585	1.09444	1.10854	0.0315699	0.00911344
0.233376	196.703	242.876	235.726	187.94	212.455	171.998	221.673	252.884	205.05	192.199	358.147	190.625		0.233376	181.703	227.876	220.726	172.94	197.455	156.998	206.673	237.884	190.05	177.199	343.147	175.625		0.233376	1.10982	1.07446	1.04924	1.13265	1.10655	1.12947	1.12207	1.14683	1.1354	1.10621	1.07247	1.09693	1.10684	0.0293577	0.00847485
0.254592	192.065	240.914	229.957	189.171	212.135	175.851	221.878	247.058	200.91	190.947	359.669	182.001		0.254592	177.065	225.914	214.957	174.171	197.135	160.851	206.878	232.058	185.91	175.947	344.669	167.001		0.254592	1.08149	1.06521	1.02181	1.14071	1.10475	1.15719	1.12318	1.11875	1.11067	1.09839	1.07722	1.04307	1.0952	0.0394345	0.0113838
0.275808	200.91	239.453	230.53	184.718	213.382	178.124	217.052	247.61	205.285	190.355	361.132	184.57		0.275808	185.91	224.453	215.53	169.718	198.382	163.124	202.052	232.61	190.285	175.355	346.132	169.57		0.275808	1.13551	1.05832	1.02454	1.11154	1.11174	1.17354	1.09698	1.12141	1.1368	1.0947	1.0818	1.05911	1.1005	0.0407013	0.0117495
0.297024	199.002	237.442	233.484	183.927	214.722	172.737	221.592	251.422	204.565	192.937	367.721	187.204		0.297024	184.002	222.442	218.484	168.927	199.722	157.737	206.592	236.422	189.565	177.937	352.721	172.204		0.297024	1.12386	1.04884	1.03858	1.10636	1.11925	1.13479	1.12163	1.13979	1.1325	1.11082	1.10239	1.07556	1.10453	0.0332497	0.00959837
0.31824	197.856	241.341	233.972	184.068	213.93	174	224.913	249.97	202.968	194.408	358.248	186.584		0.31824	182.856	226.341	218.972	169.068	198.93	159	209.913	234.97	187.968	179.408	343.248	171.584		0.31824	1.11686	1.06722	1.0409	1.10729	1.11481	1.14387	1.13966	1.13278	1.12296	1.12	1.07278	1.07169	1.10424	0.0329609	0.009515
0.339456	195.46	241.923	236.425	184.149	211.851	173.157	224.455	249.888	201.995	194.794	358.808	187.606		0.339456	180.46	226.923	221.425	169.149	196.851	158.157	209.455	234.888	186.995	179.794	343.808	172.606		0.339456	1.10223	1.06997	1.05256	1.10782	1.10316	1.13781	1.13717	1.13239	1.11715	1.12241	1.07453	1.07807	1.10294	0.028462	0.00821626
0.360672	197.649	238.11	237.384	182.65	210.966	174.925	228.046	245.631	200.095	199.198	365.468	189.83		0.360672	182.649	223.11	222.384	167.65	195.966	159.925	213.046	230.631	185.095	184.198	350.468	174.83		0.360672	1.1156	1.05199	1.05712	1.098	1.0982	1.15053	1.15667	1.11187	1.1058	1.1499	1.09535	1.09196	1.10692	0.0334879	0.00966713
0.381888	194.099	241.648	235.811	185.868	213.497	172.03	221.6	243.813	198.084	191.012	352.951	184.61		0.381888	179.099	226.648	220.811	170.868	198.497	157.03	206.6	228.813	183.084	176.012	337.951	169.61		0.381888	1.09391	1.06867	1.04964	1.11908	1.11239	1.1297	1.12167	1.1031	1.09378	1.0988	1.05623	1.05936	1.09219	0.0274854	0.00793434
0.403104	197.867	240.052	238.477	182.449	216.273	171.743	223.177	241.561	199.433	191.999	361.692	182.799		0.403104	182.867	225.052	223.477	167.449	201.273	156.743	208.177	226.561	184.433	176.999	346.692	167.799		0.403104	1.11693	1.06115	1.06231	1.09668	1.12794	1.12763	1.13024	1.09225	1.10184	1.10496	1.08355	1.04805	1.09613	0.0279022	0.00805467
0.42432	196.657	239.985	239.633	183.359	205.888	171.895	220.246	246.277	198.585	192.711	350.498	185.455		0.42432	181.657	224.985	224.633	168.359	190.888	156.895	205.246	231.277	183.585	177.711	335.498	170.455		0.42432	1.10954	1.06083	1.06781	1.10264	1.06975	1.12873	1.11432	1.11498	1.09678	1.10941	1.04856	1.06464	1.09067	0.0266087	0.00768127
0.445536	192.829	241.73	232.609	181.617	208.988	171.281	221.194	249.671	201.683	189.654	356.115	186.891		0.445536	177.829	226.73	217.609	166.617	193.988	156.281	206.194	234.671	186.683	174.654	341.115	171.891		0.445536	1.08616	1.06906	1.03442	1.09123	1.08712	1.12431	1.11947	1.13134	1.11528	1.09032	1.06612	1.07361	1.0907	0.028252	0.00815564
0.466752	195.224	244.182	232.286	182.539	210.43	171.502	217.059	243.295	196.096	191.399	361.147	181.199		0.466752	180.224	229.182	217.286	167.539	195.43	156.502	202.059	228.295	181.096	176.399	346.147	166.199		0.466752	1.10078	1.08062	1.03288	1.09727	1.0952	1.1259	1.09702	1.1006	1.08191	1.10121	1.08184	1.03806	1.08611	0.0265798	0.00767293
0.487968	195.28	244.128	232.848	178.16	210.055	170.925	223.426	241.154	198.98	189.985	359.037	185.008		0.487968	180.28	229.128	217.848	163.16	195.055	155.925	208.426	226.154	183.98	174.985	344.037	170.008		0.487968	1.10113	1.08037	1.03556	1.06859	1.0931	1.12175	1.13159	1.09028	1.09914	1.09239	1.07525	1.06185	1.08758	0.0259642	0.0074952
0.509184	191.233	241.447	228.127	183.028	209.106	170.23	221.971	238.063	201.316	191.499	361.532	184.976		0.509184	176.233	226.447	213.127	168.028	194.106	155.23	206.971	223.063	186.316	176.499	346.532	169.976		0.509184	1.07641	1.06772	1.01311	1.10048	1.08778	1.11675	1.12369	1.07538	1.11309	1.10184	1.08305	1.06165	1.08508	0.0301605	0.0087066
0.5304	189.346	241.958	232.261	181.887	215.341	171.779	219.258	244.835	199.357	191.041	354.941	186.977		0.5304	174.346	226.958	217.261	166.887	200.341	156.779	204.258	229.835	184.357	176.041	339.941	171.977		0.5304	1.06488	1.07013	1.03277	1.093	1.12272	1.12789	1.10896	1.10803	1.10139	1.09898	1.06245	1.07414	1.08878	0.0281302	0.00812049
0.551616	194.06	236.735	237.775	184.559	215.648	171.182	215.616	243.979	198.441	188.14	361.164	189.971		0.551616	179.06	221.735	222.775	169.559	200.648	156.182	200.616	228.979	183.441	173.14	346.164	174.971		0.551616	1.09367	1.04551	1.05898	1.1105	1.12444	1.1236	1.08919	1.1039	1.09592	1.08087	1.0819	1.09284	1.09178	0.0234312	0.00676399
0.572832	194.413	240.574	234.095	178.898	216.07	171.934	216.703	238.168	193.373	191.664	357.36	187.393		0.572832	179.413	225.574	219.095	163.898	201.07	156.934	201.703	223.168	178.373	176.664	342.36	172.393		0.572832	1.09583	1.06361	1.04148	1.07343	1.12681	1.12901	1.09509	1.07589	1.06564	1.10287	1.07001	1.07674	1.0847	0.0260382	0.00751658
0.594048	194.171	232.08	232.795	181.299	208.016	172.266	221.439	244.153	198.095	188.547	349.91	186.932		0.594048	179.171	217.08	217.795	166.299	193.016	157.266	206.439	229.153	183.095	173.547	334.91	171.932		0.594048	1.09435	1.02356	1.0353	1.08915	1.08167	1.1314	1.1208	1.10474	1.09385	1.08341	1.04672	1.07386	1.08157	0.0326321	0.00942007
0.615264	192.805	236.97	231.333	178.261	212.22	174.861	218.661	243.056	195.302	189.994	357.066	183.951		0.615264	177.805	221.97	216.333	163.261	197.22	159.861	203.661	228.056	180.302	174.994	342.066	168.951		0.615264	1.08601	1.04661	1.02835	1.06926	1.10523	1.15007	1.10572	1.09945	1.07716	1.09244	1.06909	1.05524	1.08205	0.0321407	0.00927822
0.63648	192.599	242.004	233.918	184.286	210.07	171.348	219.447	244.621	199.726	187.062	355.706	188.616		0.63648	177.599	227.004	218.918	169.286	195.07	156.348	204.447	229.621	184.726	172.062	340.706	173.616		0.63648	1.08475	1.07035	1.04064	1.10872	1.09318	1.12479	1.10999	1.107	1.10359	1.07414	1.06484	1.08438	1.08886	0.0237307	0.00685045
0.657696	189.596	236.724	236.382	181.402	213.707	174.993	218.776	242.398	198.882	191.062	359.176	186.036		0.657696	174.596	221.724	221.382	166.402	198.707	159.993	203.776	227.398	183.882	176.062	344.176	171.036		0.657696	1.06641	1.04545	1.05236	1.08983	1.11356	1.15102	1.10634	1.09628	1.09855	1.09911	1.07568	1.06827	1.08857	0.0291572	0.00841696
0.678912	196.664	239.757	239.486	180.023	208.351	167.831	218.475	241.894	198.44	192.822	362.628	190.401		0.678912	181.664	224.757	224.486	165.023	193.351	152.831	203.475	226.894	183.44	177.822	347.628	175.401		0.678912	1.10958	1.05976	1.06711	1.0808	1.08355	1.09949	1.10471	1.09385	1.09591	1.1101	1.08647	1.09553	1.09057	0.0158045	0.00456238
0.700128	197.81	236.641	233.666	178.974	210.815	167.047	216.47	242.116	198.13	189.436	351.345	186.139		0.700128	182.81	221.641	218.666	163.974	195.815	152.047	201.47	227.116	183.13	174.436	336.345	171.139		0.700128	1.11658	1.04506	1.03944	1.07392	1.09736	1.09385	1.09382	1.09492	1.09406	1.08896	1.05121	1.06891	1.07984	0.0240768	0.00695038
0.721344	193.307	236.382	234.543	178.395	209.758	167.832	215.675	242.353	199.22	194.682	356.674	185.699		0.721344	178.307	221.382	219.543	163.395	194.758	152.832	200.675	227.353	184.22	179.682	341.674	170.699		0.721344	1.08908	1.04384	1.04361	1.07013	1.09143	1.0995	1.08951	1.09606	1.10057	1.12171	1.06786	1.06616	1.08162	0.0236267	0.00682044
0.74256	194.064	236.684	231.965	176.885	210.391	173.264	216.989	243.047	199.794	190.394	361.559	187.092		0.74256	179.064	221.684	216.965	161.885	195.391	158.264	201.989	228.047	184.794	175.394	346.559	172.092		0.74256	1.0937	1.04527	1.03136	1.06024	1.09498	1.13858	1.09664	1.09941	1.104	1.09494	1.08313	1.07486	1.08476	0.0286409	0.00826792
0.763776	194.726	234.602	234.269	175.293	208.229	169.79	214.098	240.236	195.648	187.884	353.467	187.964		0.763776	179.726	219.602	219.269	160.293	193.229	154.79	199.098	225.236	180.648	172.884	338.467	172.964		0.763776	1.09774	1.03545	1.04231	1.04982	1.08286	1.11358	1.08094	1.08586	1.07923	1.07927	1.05784	1.08031	1.07377	0.0230192	0.00664506
0.784992	194.764	238.006	241.464	178.468	211.106	167.171	217.623	241.264	197.227	189.644	357.35	190.856		0.784992	179.764	223.006	226.464	163.468	196.106	152.171	202.623	226.264	182.227	174.644	342.35	175.856		0.784992	1.09797	1.0515	1.07651	1.07061	1.09899	1.09474	1.10008	1.09081	1.08866	1.09026	1.06998	1.09837	1.08571	0.0152588	0.00440484
0.806208	196.998	241.59	233.399	177.964	207.69	171.752	218.653	245.604	192.558	191.599	343.819	184.495		0.806208	181.998	226.59	218.399	162.964	192.69	156.752	203.653	230.604	177.558	176.599	328.819	169.495		0.806208	1.11162	1.0684	1.03818	1.06731	1.07984	1.1277	1.10567	1.11174	1.06077	1.10246	1.02769	1.05864	1.08	0.0316998	0.00915096
0.827424	188.644	238.4	228.68	179.291	209.251	174.028	215.491	242.578	192.769	191.277	347.857	187.279		0.827424	173.644	223.4	213.68	164.291	194.251	159.028	200.491	227.578	177.769	176.277	332.857	172.279		0.827424	1.06059	1.05336	1.01574	1.076	1.08859	1.14407	1.08851	1.09715	1.06203	1.10045	1.04031	1.07603	1.07524	0.0328042	0.00946975
0.84864	187.074	235.34	237.499	178.464	208.903	170.636	214.652	245.421	196.273	189.586	340.079	185.634		0.84864	172.074	220.34	222.499	163.464	193.903	155.636	199.652	230.421	181.273	174.586	325.079	170.634		0.84864	1.05101	1.03893	1.05767	1.07058	1.08664	1.11967	1.08395	1.11085	1.08296	1.0899	1.016	1.06576	1.07283	0.0293705	0.00847854
0.869856	187.198	237.384	235.198	177.644	210.088	171.054	219.073	245.09	194.111	195.399	347.925	186.731		0.869856	172.198	222.384	220.198	162.644	195.088	156.054	204.073	230.09	179.111	180.399	332.925	171.731		0.869856	1.05176	1.04857	1.04673	1.06521	1.09328	1.12268	1.10795	1.10926	1.07005	1.12619	1.04052	1.07261	1.07957	0.0310275	0.00895687
0.891072	192.216	231.43	229.693	176.19	214.368	170.436	214.84	241.326	196.153	193.125	349.968	189.033		0.891072	177.216	216.43	214.693	161.19	199.368	155.436	199.84	226.326	181.153	178.125	334.968	174.033		0.891072	1.08241	1.02049	1.02056	1.05569	1.11727	1.11823	1.08497	1.09111	1.08225	1.11199	1.0469	1.08699	1.07657	0.0339805	0.00980932
0.912288	192.452	237.91	233.94	178.096	210.865	170.153	218.353	237.478	192.843	192.615	349.477	188.527		0.912288	177.452	222.91	218.94	163.096	195.865	155.153	203.353	222.478	177.843	177.615	334.477	173.527		0.912288	1.08385	1.05105	1.04075	1.06817	1.09764	1.1162	1.10405	1.07256	1.06247	1.10881	1.04537	1.08383	1.07789	0.0253811	0.0073269
0.933504	191.772	237.717	234.265	182.21	211.482	173.714	217.47	237.731	193.802	194.652	345.201	189.319		0.933504	176.772	222.717	219.265	167.21	196.482	158.714	202.47	222.731	178.802	179.652	330.201	174.319		0.933504	1.0797	1.05014	1.04229	1.09512	1.10109	1.14181	1.09925	1.07378	1.0682	1.12152	1.03201	1.08877	1.08281	0.0321457	0.00927967
0.933504	195.436	236.793	235.858	176.375	212.676	170.184	220.901	232.467	194.08	190.736	347.806	187.07		0.933504	180.436	221.793	220.858	161.375	197.676	155.184	205.901	217.467	179.08	175.736	332.806	172.07		0.933504	1.10208	1.04578	1.04986	1.0569	1.10779	1.11642	1.11788	1.0484	1.06986	1.09708	1.04015	1.07473	1.07724	0.0294664	0.00850622
0.975936	188.504	235.532	233.63	179.29	213.15	169.758	214.13	229.144	193.833	189.49	353.147	181.715		0.975936	173.504	220.532	218.63	164.29	198.15	154.758	199.13	214.144	178.833	174.49	338.147	166.715		0.975936	1.05974	1.03983	1.03927	1.07599	1.11044	1.11335	1.08112	1.03238	1.06839	1.0893	1.05684	1.04128	1.06733	0.0275294	0.00794704
0.997152	191.592	238.856	235.627	181.721	211.309	167.869	216.906	236.478	197.413	188.237	352.858	180.948		0.997152	176.592	223.856	220.627	166.721	196.309	152.869	201.906	221.478	182.413	173.237	337.858	165.948		0.997152	1.0786	1.05551	1.04877	1.09192	1.10012	1.09976	1.09619	1.06774	1.08977	1.08148	1.05594	1.03649	1.07519	0.0217838	0.00628843
1.01837	188.201	238.701	233.302	181.715	210.504	171.366	216.784	236.732	196.749	189.567	349.366	180.298		1.01837	173.201	223.701	218.302	166.715	195.504	156.366	201.784	221.732	181.749	174.567	334.366	165.298		1.01837	1.05789	1.05478	1.03771	1.09188	1.09561	1.12492	1.09553	1.06896	1.08581	1.08978	1.04502	1.03243	1.07336	0.0282291	0.00814903
1.03958	188.091	240.89	234.791	178.246	206.35	169.77	212.61	237.422	198.446	194.073	361.08	181.967		1.03958	173.091	225.89	219.791	163.246	191.35	154.77	197.61	222.422	183.446	179.073	346.08	166.967		1.03958	1.05722	1.0651	1.04479	1.06916	1.07233	1.11344	1.07287	1.07229	1.09595	1.11791	1.08163	1.04285	1.07546	0.0237646	0.00686026
1.0608	193.602	242.367	235.734	182.098	211.903	168.743	217.875	241.148	196.479	193.913	353.192	179.771		1.0608	178.602	227.367	220.734	167.098	196.903	153.743	202.875	226.148	181.479	178.913	338.192	164.771		1.0608	1.09088	1.07206	1.04927	1.09439	1.10345	1.10605	1.10145	1.09025	1.08419	1.11691	1.05698	1.02914	1.08292	0.026148	0.00754829
1.08202	189.623	235.295	239.766	181.194	216.183	168.986	214.375	241.735	197.032	191.757	355.819	181.334		1.08202	174.623	220.295	224.766	166.194	201.183	153.986	199.375	226.735	182.032	176.757	340.819	166.334		1.08202	1.06657	1.03872	1.06844	1.08846	1.12744	1.1078	1.08245	1.09308	1.0875	1.10345	1.06519	1.0389	1.08067	0.0266282	0.00768689
1.10323	194.068	235.203	237.883	184.093	210.717	173.879	219.808	234.608	195.866	187.839	355.115	180.128		1.10323	179.068	220.203	222.883	169.093	195.717	158.879	204.808	219.608	180.866	172.839	340.115	165.128		1.10323	1.09372	1.03828	1.05949	1.10745	1.09681	1.143	1.11195	1.05873	1.08053	1.07899	1.06299	1.03137	1.08028	0.032309	0.00932679
1.12445	191.852	232.49	237.323	180.964	218.642	172.213	214.35	237.329	197.312	190.398	354.355	180.78		1.12445	176.852	217.49	222.323	165.964	203.642	157.213	199.35	222.329	182.312	175.398	339.355	165.78		1.12445	1.08019	1.02549	1.05683	1.08696	1.14122	1.13102	1.08231	1.07184	1.08917	1.09497	1.06062	1.03544	1.07967	0.0339078	0.00978835
1.14566	191.119	234.633	236.742	179.13	213.18	166.915	215.209	234.858	193.723	187.436	359.885	177.578		1.14566	176.119	219.633	221.742	164.13	198.18	151.915	200.209	219.858	178.723	172.436	344.885	162.578		1.14566	1.07571	1.0356	1.05407	1.07495	1.11061	1.0929	1.08698	1.05993	1.06773	1.07647	1.0779	1.01544	1.06902	0.0254643	0.00735091
1.16688	194.084	238.041	229.11	184.328	214.115	166.609	219.18	238.055	195.333	188.626	348.751	179.273		1.16688	179.084	223.041	214.11	169.328	199.115	151.609	204.18	223.055	180.333	173.626	333.751	164.273		1.16688	1.09382	1.05166	1.01779	1.10899	1.11585	1.0907	1.10854	1.07534	1.07735	1.0839	1.0431	1.02603	1.07442	0.0328414	0.00948049
1.1881	192.233	231.397	232.278	182.617	211.119	165.77	212.018	239.088	197.921	185.381	350.366	182.561		1.1881	177.233	216.397	217.278	167.617	196.119	150.77	197.018	224.088	182.921	170.381	335.366	167.561		1.1881	1.08252	1.02034	1.03285	1.09778	1.09906	1.08466	1.06965	1.08032	1.09281	1.06365	1.04815	1.04656	1.0682	0.0260941	0.00753272
1.20931	192.866	232.447	234.772	182.196	210.848	165.777	216.352	238.008	195.016	186.398	358.632	184.545		1.20931	177.866	217.447	219.772	167.196	195.848	150.777	201.352	223.008	180.016	171.398	343.632	169.545		1.20931	1.08638	1.02529	1.0447	1.09503	1.09754	1.08471	1.09318	1.07512	1.07545	1.06999	1.07398	1.05895	1.07336	0.0215417	0.00621854
1.23053	188.668	235.212	230.841	181.351	218.92	166.231	216.214	234.434	194.499	184.185	355.667	181.385		1.23053	173.668	220.212	215.841	166.351	203.92	151.231	201.214	219.434	179.499	169.185	340.667	166.385		1.23053	1.06074	1.03833	1.02602	1.08949	1.14278	1.08798	1.09243	1.05789	1.07237	1.05618	1.06472	1.03922	1.06901	0.0313828	0.00905944
1.25174	189.089	235.089	227.665	181.607	214.349	168.093	214.687	234.421	198.03	188.101	349.682	183.634		1.25174	174.089	220.089	212.665	166.607	199.349	153.093	199.687	219.421	183.03	173.101	334.682	168.634		1.25174	1.06331	1.03775	1.01092	1.09117	1.11716	1.10138	1.08414	1.05782	1.09346	1.08063	1.04601	1.05326	1.06975	0.0302998	0.0087468
1.27296	189.101	236.776	233.186	175.575	212	165.691	212.858	237.787	197.531	186.997	355.493	182.217		1.27296	174.101	221.776	218.186	160.575	197	150.691	197.858	222.787	182.531	171.997	340.493	167.217		1.27296	1.06339	1.0457	1.03716	1.05166	1.104	1.0841	1.07421	1.07405	1.09048	1.07373	1.06417	1.04441	1.06726	0.0201561	0.00581857
1.29418	188.551	233.178	232.396	176.738	207.703	163.761	217.141	231.893	194.969	187.338	350.048	176.983		1.29418	173.551	218.178	217.396	161.738	192.703	148.761	202.141	216.893	179.969	172.338	335.048	161.983		1.29418	1.06003	1.02874	1.03341	1.05928	1.07992	1.07021	1.09747	1.04564	1.07517	1.07586	1.04715	1.01172	1.05705	0.0246229	0.00710801
1.31539	185.644	237.825	228.803	176.782	206.719	163.302	210.841	232.93	196.831	181.399	347.126	178.407		1.31539	170.644	222.825	213.803	161.782	191.719	148.302	195.841	217.93	181.831	166.399	332.126	163.407		1.31539	1.04227	1.05065	1.01633	1.05957	1.0744	1.06691	1.06326	1.05064	1.0863	1.03879	1.03802	1.02062	1.05065	0.0208636	0.0060228
1.33661	188.3	232.616	237.102	179.356	210.828	167.702	212.63	234.08	197.819	187.674	352.373	179.418		1.33661	173.3	217.616	222.102	164.356	195.828	152.702	197.63	219.08	182.819	172.674	337.373	164.418		1.33661	1.05849	1.02609	1.05578	1.07643	1.09743	1.09856	1.07297	1.05618	1.0922	1.07796	1.05442	1.02693	1.06612	0.0243939	0.00704191
1.35782	185.609	232.504	233.927	173.071	209.326	167.441	212.987	234.173	191.243	186.429	346.946	174.322		1.35782	170.609	217.504	218.927	158.071	194.326	152.441	197.987	219.173	176.243	171.429	331.946	159.322		1.35782	1.04206	1.02556	1.04069	1.03526	1.08901	1.09669	1.07491	1.05663	1.05291	1.07019	1.03746	0.995103	1.05137	0.0284364	0.00820887
1.37904	187.542	236.105	235.24	180.566	208.306	167.369	211.641	232.565	195.835	188.852	355.647	180.004		1.37904	172.542	221.105	220.24	165.566	193.306	152.369	196.641	217.565	180.835	173.852	340.647	165.004		1.37904	1.05386	1.04254	1.04693	1.08435	1.0833	1.09617	1.0676	1.04888	1.08035	1.08531	1.06465	1.03059	1.06538	0.0207435	0.00598813
1.40026	189.005	237.553	233.873	179.924	209.704	168.198	210.535	235.344	195.977	184.972	345.744	175.849		1.40026	174.005	222.553	218.873	164.924	194.704	153.198	195.535	220.344	180.977	169.972	330.744	160.849		1.40026	1.0628	1.04936	1.04043	1.08015	1.09113	1.10213	1.0616	1.06227	1.0812	1.06109	1.0337	1.00464	1.06088	0.0267297	0.00771619
1.42147	186.407	230.507	235.483	177.888	206.242	166.744	217.548	232.036	195.609	183.242	353.138	172.182		1.42147	171.407	215.507	220.483	162.888	191.242	151.744	202.548	217.036	180.609	168.242	338.138	157.182		1.42147	1.04693	1.01614	1.04808	1.06681	1.07173	1.09167	1.09968	1.04633	1.079	1.05029	1.05681	0.981737	1.0546	0.0322281	0.00930344
1.44269	188.818	235.575	235.91	175.518	205.634	163.637	216.643	237.6	197.475	182.83	351.966	181.326		1.44269	173.818	220.575	220.91	160.518	190.634	148.637	201.643	222.6	182.475	167.83	336.966	166.326		1.44269	1.06166	1.04004	1.05011	1.05129	1.06832	1.06932	1.09476	1.07315	1.09014	1.04772	1.05315	1.03885	1.06154	0.0181847	0.00524946
1.4639	186.348	236.262	234.338	176.311	206.269	162.323	209.722	233.727	194.63	185.204	343.838	178.71		1.4639	171.348	221.262	219.338	161.311	191.269	147.323	194.722	218.727	179.63	170.204	328.838	163.71		1.4639	1.04657	1.04328	1.04264	1.05648	1.07188	1.05987	1.05719	1.05448	1.07315	1.06254	1.02775	1.02251	1.05153	0.0157163	0.00453691
1.48512	192.178	235.285	232.237	180.031	204.003	161.524	208.929	235.038	194.911	185.949	347.01	183.484		1.48512	177.178	220.285	217.237	165.031	189.003	146.524	193.929	220.038	179.911	170.949	332.01	168.484		1.48512	1.08218	1.03867	1.03265	1.08085	1.05918	1.05412	1.05288	1.0608	1.07483	1.06719	1.03766	1.05233	1.05778	0.0164768	0.00475643
1.50634	190.487	228.363	231.505	180.216	203.299	167.373	215.043	235.507	197.336	182.473	351.181	178.993		1.50634	175.487	213.363	216.505	165.216	188.299	152.373	200.043	220.507	182.336	167.473	336.181	163.993		1.50634	1.07185	1.00603	1.02917	1.08206	1.05524	1.0962	1.08608	1.06306	1.08931	1.04549	1.0507	1.02428	1.05829	0.0284596	0.00821559
1.52755	191.112	225.698	237.515	180.212	206.314	164.515	210.246	232.607	197.999	187.667	350.846	180.841		1.52755	176.112	210.698	222.515	165.212	191.314	149.515	195.246	217.607	182.999	172.667	335.846	165.841		1.52755	1.07567	0.993466	1.05774	1.08203	1.07213	1.07564	1.06003	1.04908	1.09328	1.07792	1.04965	1.03582	1.0602	0.0266175	0.0076838
1.54877	187.339	230.2	238.068	178.98	203.84	164.427	212.705	235.937	196.21	187.827	345.234	178.45		1.54877	172.339	215.2	223.068	163.98	188.84	149.427	197.705	220.937	181.21	172.827	330.234	163.45		1.54877	1.05262	1.01469	1.06037	1.07396	1.05827	1.075	1.07338	1.06513	1.08259	1.07892	1.03211	1.02089	1.05733	0.0230135	0.00664342
1.56998	190.141	233.249	235.8	173.877	205.776	162.663	208.421	232.316	196.026	187.302	348.2	183.348		1.56998	175.141	218.249	220.8	158.877	190.776	147.663	193.421	217.316	181.026	172.302	333.2	168.348		1.56998	1.06974	1.02907	1.04959	1.04054	1.06912	1.06231	1.05012	1.04768	1.08149	1.07564	1.04138	1.05148	1.05568	0.0158918	0.00458758
1.5912	185.169	238.19	237.065	175.461	203.147	160.723	210.829	235.931	192.889	185.443	346.519	183.221		1.5912	170.169	223.19	222.065	160.461	188.147	145.723	195.829	220.931	177.889	170.443	331.519	168.221		1.5912	1.03937	1.05237	1.0556	1.05092	1.05438	1.04836	1.0632	1.0651	1.06275	1.06403	1.03613	1.05069	1.05357	0.00941052	0.00271658
1.61242	187.646	236.623	232.321	176.636	207.771	162.799	210.673	229.671	187.36	182.691	352	180.768		1.61242	172.646	221.623	217.321	161.636	192.771	147.799	195.673	214.671	172.36	167.691	337	165.768		1.61242	1.0545	1.04498	1.03305	1.05861	1.0803	1.06329	1.06235	1.03492	1.02972	1.04685	1.05326	1.03536	1.04977	0.0151561	0.0043752
1.63363	186.804	239.64	231.604	178.096	206.132	164.852	208.525	231.027	192.018	182.135	343.473	176.804		1.63363	171.804	224.64	216.604	163.096	191.132	149.852	193.525	216.027	177.018	167.135	328.473	161.804		1.63363	1.04936	1.0592	1.02964	1.06817	1.07111	1.07806	1.05069	1.04146	1.05754	1.04338	1.02661	1.01061	1.04882	0.0198164	0.00572049
1.65485	189.055	231.319	237.001	175.093	204.117	162.263	209.803	231.562	190.94	183.708	348.097	186.486		1.65485	174.055	216.319	222.001	160.093	189.117	147.263	194.803	216.562	175.94	168.708	333.097	171.486		1.65485	1.06311	1.01997	1.0553	1.04851	1.05982	1.05943	1.05763	1.04404	1.0511	1.0532	1.04106	1.07108	1.05202	0.0130375	0.0037636
1.67606	187.733	230.172	237.454	175.07	203.316	162.551	211.465	233.246	191.133	187.009	345.103	180.685		1.67606	172.733	215.172	222.454	160.07	188.316	147.551	196.465	218.246	176.133	172.009	330.103	165.685		1.67606	1.05503	1.01456	1.05745	1.04836	1.05533	1.06151	1.06665	1.05216	1.05226	1.07381	1.0317	1.03485	1.0503	0.0162859	0.00470132
1.69728	185.86	234.591	231.276	173.917	205.995	158.346	210.989	230.007	191.981	183.809	351.293	180.89		1.69728	170.86	219.591	216.276	158.917	190.995	143.346	195.989	215.007	176.981	168.809	336.293	165.89		1.69728	1.04359	1.0354	1.02808	1.0408	1.07034	1.03125	1.06407	1.03654	1.05732	1.05383	1.05105	1.03613	1.0457	0.0134958	0.0038959
1.7185	187.492	235.925	232.437	176.561	209.476	160.478	209.375	228.684	192.572	185.129	348.102	175.744		1.7185	172.492	220.925	217.437	161.561	194.476	145.478	194.375	213.684	177.572	170.129	333.102	160.744		1.7185	1.05356	1.04169	1.0336	1.05812	1.08985	1.04659	1.0553	1.03017	1.06085	1.06207	1.04107	1.00398	1.04807	0.0210065	0.00606405
1.73971	184.858	235.367	228.794	180.016	210.247	159.924	208.6	232.152	193.239	183.558	345.879	178.761		1.73971	169.858	220.367	213.794	165.016	195.247	144.924	193.6	217.152	178.239	168.558	330.879	163.761		1.73971	1.03747	1.03906	1.01629	1.08075	1.09417	1.04261	1.05109	1.04688	1.06484	1.05227	1.03412	1.02283	1.04853	0.0224935	0.00649331
1.76093	187.798	235.115	231.61	177.258	203.748	163.836	206.801	230.278	192.266	183.115	344.537	177.255		1.76093	172.798	220.115	216.61	162.258	188.748	148.836	191.801	215.278	177.266	168.115	329.537	162.255		1.76093	1.05543	1.03787	1.02967	1.06269	1.05775	1.07075	1.04133	1.03785	1.05903	1.0495	1.02993	1.01342	1.04543	0.0166149	0.00479632
1.78214	188.527	233.149	231.941	176.479	202.439	163.699	211.86	232.408	198.529	187.317	348.324	180.273		1.78214	173.527	218.149	216.941	161.479	187.439	148.699	196.86	217.408	183.529	172.317	333.324	165.273		1.78214	1.05988	1.0286	1.03124	1.05758	1.05042	1.06977	1.06879	1.04812	1.09644	1.07573	1.04177	1.03227	1.05505	0.0204658	0.00590798
1.80336	185.323	228.931	232.097	175.035	206.424	164.991	212.5	231.779	194.344	179.128	349.238	177.767		1.80336	170.323	213.931	217.097	160.035	191.424	149.991	197.5	216.779	179.344	164.128	334.238	162.767		1.80336	1.04031	1.00871	1.03199	1.04813	1.07275	1.07906	1.07227	1.04509	1.07144	1.02461	1.04462	1.01662	1.0463	0.0235331	0.00679341
1.82458	188.949	230.413	230.93	174.623	211.808	165.765	208.567	230.434	187.357	180.824	343.675	175.537		1.82458	173.949	215.413	215.93	159.623	196.808	150.765	193.567	215.434	172.357	165.824	328.675	160.537		1.82458	1.06246	1.0157	1.02644	1.04543	1.10292	1.08463	1.05092	1.0386	1.0297	1.0352	1.02724	1.00269	1.04349	0.0284729	0.00821942
1.84579	185.443	230.373	235.179	176.252	208.284	165.832	207.442	227.587	191.275	182.747	344.015	176.014		1.84579	170.443	215.373	220.179	161.252	193.284	150.832	192.442	212.587	176.275	167.747	329.015	161.014		1.84579	1.04104	1.01551	1.04664	1.0561	1.08317	1.08511	1.04481	1.02488	1.0531	1.0472	1.0283	1.00567	1.04429	0.0240688	0.00694806
1.86701	186.471	235.879	233.223	178.739	208.021	165.687	210.942	230.325	189.246	184.115	346.686	180.43		1.86701	171.471	220.879	218.223	163.739	193.021	150.687	195.942	215.325	174.246	169.115	331.686	165.43		1.86701	1.04732	1.04147	1.03734	1.07239	1.0817	1.08407	1.06381	1.03808	1.04098	1.05574	1.03665	1.03325	1.05273	0.0183972	0.00531081
1.88822	194.252	234.051	230.218	175.904	208.841	164.429	205.274	231.056	190.285	184.973	343.658	178.017		1.88822	179.252	219.051	215.218	160.904	193.841	149.429	190.274	216.056	175.285	169.973	328.658	163.017		1.88822	1.09485	1.03285	1.02305	1.05382	1.08629	1.07502	1.03304	1.0416	1.04719	1.0611	1.02718	1.01818	1.04951	0.0252419	0.0072867
1.90944	188.296	233.902	233.394	172.819	204.647	161.382	209.13	230.739	196.224	183.563	342.46	177.625		1.90944	173.296	218.902	218.394	157.819	189.647	146.382	194.13	215.739	181.224	168.563	327.46	162.625		1.90944	1.05847	1.03215	1.03815	1.03361	1.06279	1.0531	1.05397	1.04007	1.08267	1.0523	1.02344	1.01573	1.04554	0.018587	0.0053656
1.93066	186.597	236.786	232.857	178.954	205.577	164.206	207.195	227.201	191.222	185.409	339.767	177.896		1.93066	171.597	221.786	217.857	163.954	190.577	149.206	192.195	212.201	176.222	170.409	324.767	162.896		1.93066	1.04809	1.04575	1.0356	1.07379	1.068	1.07341	1.04347	1.02302	1.05279	1.06382	1.01502	1.01743	1.04668	0.0208665	0.00602363
1.95187	185.672	230.239	230.909	174.211	208.492	166.121	207.854	233.525	191.305	178.949	340.311	177.069		1.95187	170.672	215.239	215.909	159.211	193.492	151.121	192.854	218.525	176.305	163.949	325.311	162.069		1.95187	1.04244	1.01488	1.02634	1.04273	1.08434	1.08719	1.04704	1.0535	1.05328	1.02349	1.01672	1.01226	1.04202	0.0251671	0.00726513
1.97309	183.605	236.37	234.171	174.45	209.287	163.331	206.798	232.77	192.144	179.47	339.492	179.549		1.97309	168.605	221.37	219.171	159.45	194.287	148.331	191.798	217.77	177.144	164.47	324.492	164.549		1.97309	1.02982	1.04379	1.04185	1.0443	1.08879	1.06712	1.04131	1.04986	1.0583	1.02675	1.01416	1.02775	1.04448	0.0200953	0.00580101
1.9943	182.215	233.26	228.348	179.88	201.188	163.295	207.315	234.425	193.622	184.608	347.383	177.139		1.9943	167.215	218.26	213.348	164.88	186.188	148.295	192.315	219.425	178.622	169.608	332.383	162.139		1.9943	1.02133	1.02912	1.01417	1.07986	1.04341	1.06686	1.04412	1.05784	1.06713	1.05882	1.03883	1.0127	1.04451	0.0221232	0.00638641
2.01552	191.257	232.911	227.142	175.208	202.804	159.446	205.459	232.316	190.496	183.592	345.641	183.179		2.01552	176.257	217.911	212.142	160.208	187.804	144.446	190.459	217.316	175.496	168.592	330.641	168.179		2.01552	1.07655	1.02748	1.00843	1.04926	1.05246	1.03917	1.03404	1.04768	1.04845	1.05248	1.03338	1.05042	1.04332	0.016715	0.00482521
2.03674	185.233	229.903	235.534	176.141	206.26	165.692	203.876	231.334	190.513	181.397	343.647	183.55		2.03674	170.233	214.903	220.534	161.141	191.26	150.692	188.876	216.334	175.513	166.397	328.647	168.55		2.03674	1.03976	1.01329	1.04832	1.05537	1.07183	1.0841	1.02545	1.04294	1.04855	1.03877	1.02715	1.05274	1.04569	0.0195658	0.00564817
2.05795	186.998	228.462	226.021	173.109	200.927	158.841	205.181	234.237	192.629	180.836	341.725	180.149		2.05795	171.998	213.462	211.021	158.109	185.927	143.841	190.181	219.237	177.629	165.836	326.725	165.149		2.05795	1.05054	1.0065	1.0031	1.03551	1.04194	1.03482	1.03253	1.05694	1.06119	1.03527	1.02114	1.0315	1.03425	0.0178142	0.00514251
2.07917	189.576	229.766	231.45	173.133	206.241	161.663	203.528	232.344	191.928	185.553	341.973	178.913		2.07917	174.576	214.766	216.45	158.133	191.241	146.663	188.528	217.344	176.928	170.553	326.973	163.913		2.07917	1.06629	1.01265	1.02891	1.03567	1.07172	1.05512	1.02356	1.04781	1.05701	1.06472	1.02192	1.02378	1.04243	0.0203756	0.00588194
2.10038	188.294	232.266	228.835	175.976	206.034	160.51	210.292	230.81	194.421	181.898	343.097	176.412		2.10038	173.294	217.266	213.835	160.976	191.034	145.51	195.292	215.81	179.421	166.898	328.097	161.412		2.10038	1.05846	1.02443	1.01648	1.05429	1.07056	1.04682	1.06028	1.04042	1.0719	1.0419	1.02543	1.00816	1.04326	0.0210029	0.006063
2.1216	186.206	232.59	228.802	179.797	204.06	161.052	209.961	232.941	192.949	182.28	341.264	180.677		2.1216	171.206	217.59	213.802	164.797	189.06	146.052	194.961	217.941	177.949	167.28	326.264	165.677		2.1216	1.0457	1.02596	1.01632	1.07932	1.0595	1.05072	1.05848	1.05069	1.06311	1.04429	1.0197	1.0348	1.04572	0.0187963	0.00542603
2.14282	187.379	236.041	230.674	176.669	200.314	161.861	211.158	236.888	194.877	182.391	345.75	177.745		2.14282	172.379	221.041	215.674	161.669	185.314	146.861	196.158	221.888	179.877	167.391	330.75	162.745		2.14282	1.05287	1.04223	1.02522	1.05883	1.03851	1.05654	1.06498	1.06972	1.07462	1.04498	1.03372	1.01648	1.04823	0.0179156	0.0051718
2.16403	185.659	234.93	224.099	178.672	203.821	160.714	208.146	233.097	193.155	182.306	348.545	178.577		2.16403	170.659	219.93	209.099	163.672	188.821	145.714	193.146	218.097	178.155	167.306	333.545	163.577		2.16403	1.04236	1.037	0.993967	1.07195	1.05816	1.04829	1.04863	1.05144	1.06434	1.04445	1.04246	1.02168	1.04373	0.0203275	0.00586804
2.18525	188.37	231.068	228.786	176.341	207.157	160.609	205.806	233.142	188.089	181.904	348.689	175.551		2.18525	173.37	216.068	213.786	161.341	192.157	145.609	190.806	218.142	173.089	166.904	333.689	160.551		2.18525	1.05892	1.01879	1.01625	1.05668	1.07686	1.04754	1.03593	1.05166	1.03407	1.04194	1.04291	1.00278	1.04036	0.0205589	0.00593486
2.20646	184.932	234.127	227.735	174.087	203.427	162.097	207.528	230.97	188.969	181.946	346.283	178.616		2.20646	169.932	219.127	212.735	159.087	188.427	147.097	192.528	215.97	173.969	166.946	331.283	163.616		2.20646	1.03792	1.03321	1.01125	1.04192	1.05595	1.05824	1.04527	1.04119	1.03933	1.0422	1.03539	1.02192	1.03865	0.012893	0.00372189
2.22768	185.021	234.756	231.442	173.271	200.025	161.723	207.369	233.186	192.446	182.209	347.894	177.355		2.22768	170.021	219.756	216.442	158.271	185.025	146.723	192.369	218.186	177.446	167.209	332.894	162.355		2.22768	1.03847	1.03618	1.02887	1.03657	1.03689	1.05555	1.04441	1.05187	1.0601	1.04384	1.04042	1.01405	1.0406	0.0122569	0.00353827
2.2489	182.822	236.971	231.527	174.334	199.984	160.843	211.425	230.949	189.849	181.46	342.268	184.206		2.2489	167.822	221.971	216.527	159.334	184.984	145.843	196.425	215.949	174.849	166.46	327.268	169.206		2.2489	1.02503	1.04662	1.02928	1.04354	1.03666	1.04922	1.06643	1.04109	1.04459	1.03917	1.02284	1.05684	1.04177	0.0126246	0.0036444
2.27011	184.148	235.278	233.024	175.704	198.853	164.852	212.146	229.883	188.434	179.04	343.385	181.758		2.27011	169.148	220.278	218.024	160.704	183.853	149.852	197.146	214.883	173.434	164.04	328.385	166.758		2.27011	1.03313	1.03864	1.03639	1.05251	1.03032	1.07806	1.07035	1.03595	1.03613	1.02406	1.02633	1.04155	1.04195	0.0168163	0.00485445
2.29133	185.132	237.897	226.985	173.01	200.179	165.612	208.692	230.074	189.522	180.704	339.165	182.022		2.29133	170.132	222.897	211.985	158.01	185.179	150.612	193.692	215.074	174.522	165.704	324.165	167.022		2.29133	1.03914	1.05099	1.00769	1.03486	1.03775	1.08353	1.05159	1.03687	1.04263	1.03445	1.01314	1.0432	1.03965	0.0190784	0.00550747
2.31254	183.403	232.344	226.316	174.424	194.346	164.36	208.391	229.064	195.063	185.019	333.624	176.76		2.31254	168.403	217.344	211.316	159.424	179.346	149.36	193.391	214.064	180.063	170.019	318.624	161.76		2.31254	1.02858	1.0248	1.00451	1.04413	1.00506	1.07452	1.04996	1.032	1.07573	1.06139	0.995823	1.01033	1.0339	0.0275247	0.00794571
2.33376	183.027	234.907	230.639	171.146	203.064	164.973	209.862	231.627	190.575	180.195	341.48	175.629		2.33376	168.027	219.907	215.639	156.146	188.064	149.973	194.862	216.627	175.575	165.195	326.48	160.629		2.33376	1.02629	1.03689	1.02506	1.02266	1.05392	1.07893	1.05795	1.04435	1.04892	1.03127	1.02038	1.00327	1.03749	0.0204202	0.00589481
2.35498	184.136	234.84	230.828	178.785	198.401	164.674	209.639	230	189.731	181.217	343.722	176.326		2.35498	169.136	219.84	215.828	163.785	183.401	149.674	194.639	215	174.731	166.217	328.722	161.326		2.35498	1.03306	1.03657	1.02595	1.07269	1.02779	1.07678	1.05674	1.03651	1.04388	1.03765	1.02738	1.00762	1.04022	0.0198801	0.0057389
2.37619	182.382	233.577	225.579	174.862	202.235	161.333	207.101	231.985	189.549	181.446	346.545	175.376		2.37619	167.382	218.577	210.579	159.862	187.235	146.333	192.101	216.985	174.549	166.446	331.545	160.376		2.37619	1.02235	1.03062	1.001	1.04699	1.04927	1.05274	1.04296	1.04608	1.04279	1.03908	1.03621	1.00169	1.03432	0.0174945	0.00505023
2.39741	182.737	229.341	229.663	172.967	202.31	155.681	206.419	234.618	187.4	180.576	351.416	177.844		2.39741	167.737	214.341	214.663	157.967	187.31	140.681	191.419	219.618	172.4	165.576	336.416	162.844		2.39741	1.02452	1.01064	1.02042	1.03458	1.04969	1.01208	1.03925	1.05877	1.02995	1.03365	1.05143	1.0171	1.03184	0.0157778	0.00455465
2.41862	183.07	228.377	228.377	175.478	200.585	162.195	208.887	231.503	190.446	180.919	349.227	175.592		2.41862	168.07	213.377	213.377	160.478	185.585	147.195	193.887	216.503	175.446	165.919	334.227	160.592		2.41862	1.02655	1.0061	1.0143	1.05103	1.04003	1.05895	1.05265	1.04376	1.04815	1.03579	1.04459	1.00304	1.03541	0.0187428	0.00541057
2.43984	184.58	233.572	224.431	173.633	193.953	161.532	204.488	233.488	186.819	183.608	341.7	178.55		2.43984	169.58	218.572	209.431	158.633	178.953	146.532	189.488	218.488	171.819	168.608	326.7	163.55		2.43984	1.03577	1.03059	0.995545	1.03894	1.00286	1.05418	1.02877	1.05333	1.02648	1.05258	1.02106	1.02151	1.03014	0.0186869	0.00539444
2.46106	184.608	228.557	228.859	174.916	199.097	158.985	203.001	229.623	186.813	185.995	347.029	182.376		2.46106	169.608	213.557	213.859	159.916	184.097	143.985	188.001	214.623	171.813	170.995	332.029	167.376		2.46106	1.03594	1.00695	1.01659	1.04735	1.03169	1.03585	1.0207	1.03469	1.02645	1.06748	1.03772	1.04541	1.0339	0.0157387	0.00454336
2.48227	180.266	230.728	227.383	171.856	202.462	159.933	206.071	232.496	189.251	181.966	346.129	182.263		2.48227	165.266	215.728	212.383	156.856	187.462	144.933	191.071	217.496	174.251	166.966	331.129	167.263		2.48227	1.00942	1.01718	1.00958	1.02731	1.05055	1.04267	1.03736	1.04854	1.04101	1.04233	1.03491	1.0447	1.0338	0.0145641	0.00420429
2.50349	183.858	232.565	225.046	173.217	192.191	164.585	205.33	230.54	184.535	182.68	342.784	176.573		2.50349	168.858	217.565	210.046	158.217	177.191	149.585	190.33	215.54	169.535	167.68	327.784	161.573		2.50349	1.03136	1.02584	0.998469	1.03622	0.992987	1.07614	1.03334	1.03911	1.01284	1.04678	1.02445	1.00916	1.02723	0.0225508	0.00650987
2.5247	181.223	231.271	224.371	173.346	193.916	165.095	203.35	235.195	183.078	180.074	342.914	178.324		2.5247	166.223	216.271	209.371	158.346	178.916	150.095	188.35	220.195	168.078	165.074	327.914	163.324		2.5247	1.01527	1.01974	0.99526	1.03707	1.00265	1.07981	1.02259	1.06156	1.00413	1.03052	1.02486	1.0201	1.02613	0.0242567	0.00700232
2.54592	180.235	235.794	229.707	173.831	204.415	160.858	207.131	229.625	181.689	182.431	348.559	180.18		2.54592	165.235	220.794	214.707	158.831	189.415	145.858	192.131	214.625	166.689	167.431	333.559	165.18		2.54592	1.00923	1.04107	1.02063	1.04024	1.06149	1.04933	1.04312	1.0347	0.995836	1.04523	1.0425	1.03169	1.03459	0.0181196	0.00523068
2.56714	179.947	237.969	227.161	172.888	201.44	165.488	206.649	227.307	185.63	180.306	342.424	180.167		2.56714	164.947	222.969	212.161	157.888	186.44	150.488	191.649	212.307	170.63	165.306	327.424	165.167		2.56714	1.00747	1.05133	1.00852	1.03407	1.04482	1.08264	1.0405	1.02353	1.01938	1.03196	1.02333	1.03161	1.03326	0.02049	0.00591496
2.58835	183.102	235.746	222.899	173.356	201.912	165.405	210.828	232.984	186.523	180.168	344.97	178.87		2.58835	168.102	220.746	207.899	158.356	186.912	150.405	195.828	217.984	171.523	165.168	329.97	163.87		2.58835	1.02674	1.04084	0.988263	1.03713	1.04746	1.08204	1.06319	1.0509	1.02472	1.0311	1.03128	1.02351	1.03727	0.0231826	0.00669225
2.60957	184.329	233.661	228.833	170.52	199.85	158.513	215.016	227.958	189.369	180.129	347.343	176.44		2.60957	169.329	218.661	213.833	155.52	184.85	143.513	200.016	212.958	174.369	165.129	332.343	161.44		2.60957	1.03424	1.03101	1.01647	1.01856	1.03591	1.03246	1.08593	1.02667	1.04172	1.03086	1.0387	1.00833	1.0334	0.0192053	0.00554408
2.63078	183.245	236.025	228.567	172.781	200.877	158.11	208.731	228.291	186.691	181.472	342.467	177.697		2.63078	168.245	221.025	213.567	157.781	185.877	143.11	193.731	213.291	171.691	166.472	327.467	162.697		2.63078	1.02762	1.04216	1.01521	1.03336	1.04166	1.02956	1.05181	1.02827	1.02572	1.03924	1.02346	1.01618	1.03119	0.01095	0.00316098
2.652	181.672	228.677	223.638	172.663	200.371	161.701	206.742	229.176	188.683	179.965	343.127	177.901		2.652	166.672	213.677	208.638	157.663	185.371	146.701	191.742	214.176	173.683	164.965	328.127	162.901		2.652	1.01801	1.00751	0.991776	1.03259	1.03883	1.05539	1.04101	1.03254	1.03762	1.02984	1.02552	1.01746	1.02734	0.0168363	0.00486023
2.67322	183.097	231.014	223.717	172.036	199.004	162.986	205.147	229.082	191.208	179.165	347.512	176.546		2.67322	168.097	216.014	208.717	157.036	184.004	147.986	190.147	214.082	176.208	164.165	332.512	161.546		2.67322	1.02671	1.01853	0.992151	1.02849	1.03117	1.06464	1.03235	1.03208	1.0527	1.02484	1.03923	1.00899	1.02932	0.0187108	0.00540133
2.69443	183.85	230.279	222.493	174.719	197.054	166.431	210.16	230.009	186.68	179.869	344.65	180.285		2.69443	168.85	215.279	207.493	159.719	182.054	151.431	195.16	215.009	171.68	164.869	329.65	165.285		2.69443	1.03131	1.01507	0.986333	1.04606	1.02024	1.08942	1.05956	1.03655	1.02565	1.02924	1.03028	1.03235	1.03351	0.0248815	0.00718266
2.71565	180.487	231.421	225.025	175.777	199.93	162.196	204.981	226.575	183.614	180.538	352.109	176.402		2.71565	165.487	216.421	210.025	160.777	184.93	147.196	189.981	211.575	168.614	165.538	337.109	161.402		2.71565	1.01077	1.02045	0.998369	1.05299	1.03636	1.05895	1.03145	1.02	1.00734	1.03341	1.0536	1.00809	1.02765	0.0201496	0.00581668
2.73686	179.011	229.023	225.148	171.577	198.855	160.507	205.895	228.386	187.04	180.56	344.951	178.709		2.73686	164.011	214.023	210.148	156.577	183.855	145.507	190.895	213.386	172.04	165.56	329.951	163.709		2.73686	1.00176	1.00914	0.998954	1.02548	1.03033	1.0468	1.03641	1.02873	1.0278	1.03355	1.03122	1.0225	1.02439	0.0142687	0.00411901
2.75808	181.089	236.285	229.021	177.508	201.274	155.854	209.11	226.185	187.72	179.271	345.396	173.752		2.75808	166.089	221.285	214.021	162.508	186.274	140.854	194.11	211.185	172.72	164.271	330.396	158.752		2.75808	1.01445	1.04338	1.01736	1.06432	1.04389	1.01333	1.05386	1.01812	1.03187	1.0255	1.03262	0.991543	1.02919	0.0200948	0.00580087
2.7793	180.444	229.533	225.392	172.872	198.628	157.804	207.58	227.676	188.422	177.582	334.277	174.314		2.7793	165.444	214.533	210.392	157.872	183.628	142.804	192.58	212.676	173.422	162.582	319.277	159.314		2.7793	1.01051	1.01155	1.00011	1.03396	1.02906	1.02736	1.04556	1.02531	1.03606	1.01496	0.997864	0.995053	1.01895	0.0163809	0.00472877
2.80051	180.87	231.646	229.522	171.022	199.432	159.14	204.604	229.819	187.631	179.881	341.39	177.606		2.80051	165.87	216.646	214.522	156.022	184.432	144.14	189.604	214.819	172.631	164.881	326.39	162.606		2.80051	1.01311	1.02151	1.01975	1.02184	1.03357	1.03697	1.0294	1.03564	1.03133	1.02931	1.0201	1.01561	1.02568	0.00800839	0.00231182
2.82173	181.568	229.224	225.553	169.955	197.98	157.73	206.014	228.352	187.395	178.816	339.399	177.786		2.82173	166.568	214.224	210.553	154.955	182.98	142.73	191.014	213.352	172.395	163.816	324.399	162.786		2.82173	1.01738	1.01009	1.00088	1.01486	1.02543	1.02682	1.03705	1.02857	1.02992	1.02266	1.01387	1.01674	1.02036	0.00995282	0.00287313
2.84294	181.081	230.862	222.204	170.415	199.794	161.422	203.523	226.584	189.877	177.33	343.213	178.216		2.84294	166.081	215.862	207.204	155.415	184.794	146.422	188.523	211.584	174.877	162.33	328.213	163.216		2.84294	1.0144	1.01781	0.984959	1.01787	1.03559	1.05338	1.02353	1.02004	1.04475	1.01339	1.02579	1.01942	1.02258	0.0171866	0.00496134
2.86416	182.797	229.271	229.912	173.653	196.413	161.398	202.041	231.492	187.505	180.049	342.58	179.647		2.86416	167.797	214.271	214.912	158.653	181.413	146.398	187.041	216.492	172.505	165.049	327.58	164.647		2.86416	1.02488	1.01031	1.0216	1.03908	1.01665	1.05321	1.01548	1.0437	1.03058	1.03036	1.02381	1.02836	1.02817	0.012371	0.00357119
2.88538	179.124	233.877	225.619	168.959	200.179	162.386	205.322	229.401	188.431	180.906	331.391	176.619		2.88538	164.124	218.877	210.619	153.959	185.179	147.386	190.322	214.401	173.431	165.906	316.391	161.619		2.88538	1.00245	1.03203	1.00119	1.00833	1.03775	1.06032	1.0333	1.03362	1.03611	1.03571	0.988844	1.00945	1.02326	0.0206854	0.00597137
2.90659	181.99	231.964	226.997	171.173	198.253	159.288	204.255	223.587	188.199	180.285	340.495	176.584		2.90659	166.99	216.964	211.997	156.173	183.253	144.288	189.255	208.587	173.199	165.285	325.495	161.584		2.90659	1.01995	1.02301	1.00774	1.02283	1.02696	1.03803	1.0275	1.00559	1.03473	1.03183	1.0173	1.00923	1.02206	0.0105918	0.00305759
2.92781	182.457	231.259	227.118	173.405	198.115	159.823	203.757	228.223	188.942	179.506	339.796	170.631		2.92781	167.457	216.259	212.118	158.405	183.115	144.823	188.757	213.223	173.942	164.506	324.796	155.631		2.92781	1.02281	1.01969	1.00832	1.03745	1.02618	1.04188	1.0248	1.02794	1.03917	1.02697	1.01511	0.97205	1.02186	0.0184625	0.00532965
2.94902	178.813	230.401	226.695	173.225	197.105	154.569	205.693	228.359	185.797	181.381	346.025	177.783		2.94902	163.813	215.401	211.695	158.225	182.105	139.569	190.693	213.359	170.797	166.381	331.025	162.783		2.94902	1.00055	1.01564	1.00631	1.03627	1.02052	1.00408	1.03531	1.0286	1.02038	1.03868	1.03458	1.01672	1.02147	0.0133418	0.00385144
2.97024	182.813	229.571	232.368	172.59	191.562	155.093	204.564	231.451	187.531	177.171	338.64	178.486		2.97024	167.813	214.571	217.368	157.59	176.562	140.093	189.564	216.451	172.531	162.171	323.64	163.486		2.97024	1.02498	1.01173	1.03327	1.03211	0.989462	1.00785	1.02918	1.04351	1.03074	1.01239	1.0115	1.02111	1.02065	0.0146928	0.00424146
2.99146	179.592	232.479	224.985	171.149	193.661	156.727	209.582	233.422	185.138	175.446	340.858	176.532		2.99146	164.592	217.479	209.985	156.149	178.661	141.727	194.582	218.422	170.138	160.446	325.858	161.532		2.99146	1.00531	1.02544	0.998179	1.02268	1.00122	1.01961	1.05643	1.05301	1.01644	1.00162	1.01843	1.00891	1.01894	0.0189741	0.00547736
3.01267	182.978	228.453	229.168	170.635	199.926	153.82	203.765	227.421	185.762	180.705	337.857	179.075		3.01267	167.978	213.453	214.168	155.635	184.926	138.82	188.765	212.421	170.762	165.705	322.857	164.075		3.01267	1.02599	1.00646	1.01806	1.01931	1.03633	0.998694	1.02484	1.02408	1.02017	1.03445	1.00905	1.02479	1.02019	0.0110194	0.00318101
3.03389	182.311	232.396	226.776	172.554	199.383	154.037	205.884	231.289	186.807	179.751	341.385	177.615		3.03389	167.311	217.396	211.776	157.554	184.383	139.037	190.884	216.289	171.807	164.751	326.385	162.615		3.03389	1.02191	1.02505	1.00669	1.03188	1.03329	1.00026	1.03635	1.04272	1.02641	1.0285	1.02008	1.01567	1.02407	0.0121769	0.00351518
3.0551	181.905	231.658	225.876	174.509	196.03	156.85	209.035	224.457	186.456	177.67	343.859	178.779		3.0551	166.905	216.658	210.876	159.509	181.03	141.85	194.035	209.457	171.456	162.67	328.859	163.779		3.0551	1.01943	1.02157	1.00241	1.04468	1.0145	1.02049	1.05346	1.00979	1.02431	1.01551	1.02781	1.02294	1.02308	0.0140463	0.00405482
3.07632	179.123	229.885	227.42	176.825	194.058	157.659	206.461	225.369	188.605	179.062	335.268	175.603		3.07632	164.123	214.885	212.42	161.825	179.058	142.659	191.461	210.369	173.605	164.062	320.268	160.603		3.07632	1.00244	1.01321	1.00975	1.05985	1.00345	1.02631	1.03948	1.01418	1.03715	1.0242	1.00096	1.0031	1.01951	0.0184181	0.00531684
3.09754	180.722	228.984	227.243	171.727	199.532	160.571	205.167	228.202	184.74	181.053	334.087	173.845		3.09754	165.722	213.984	212.243	156.727	184.532	145.571	190.167	213.202	169.74	166.053	319.087	158.845		3.09754	1.01221	1.00896	1.00891	1.02646	1.03413	1.04726	1.03246	1.02784	1.01406	1.03663	0.99727	0.992124	1.01986	0.0168196	0.00485539
3.11875	180.404	227.989	227.248	173.498	200.209	158.239	204.727	225.008	186.531	180.344	339.021	177.91		3.11875	165.404	212.989	212.248	158.498	185.209	143.239	189.727	210.008	171.531	165.344	324.021	162.91		3.11875	1.01027	1.00427	1.00894	1.03806	1.03792	1.03048	1.03007	1.01244	1.02476	1.0322	1.01269	1.01751	1.02163	0.0119827	0.00345911
3.13997	182.702	231.85	230.543	170.111	195.753	158.671	198.265	229.622	183.918	182.044	340.391	175.879		3.13997	167.702	216.85	215.543	155.111	180.753	143.671	183.265	214.622	168.918	167.044	325.391	160.879		3.13997	1.0243	1.02247	1.0246	1.01588	1.01295	1.03359	0.994984	1.03469	1.00915	1.04281	1.01697	1.00483	1.01977	0.0135367	0.00390771
3.16118	180.583	228.393	228.036	172.303	192.851	157.117	198.95	226.348	187.304	178.117	339.044	176.804		3.16118	165.583	213.393	213.036	157.303	177.851	142.117	183.95	211.348	172.304	163.117	324.044	161.804		3.16118	1.01136	1.00617	1.01268	1.03023	0.996685	1.02241	0.998703	1.0189	1.02938	1.0183	1.01276	1.01061	1.01402	0.0105755	0.00305288
3.1824	181.452	231.785	228.743	170.409	195.419	157.035	202.502	220.571	187.453	176.35	332.198	174.244		3.1824	166.452	216.785	213.743	155.409	180.419	142.035	187.502	205.571	172.453	161.35	317.198	159.244		3.1824	1.01667	1.02217	1.01604	1.01783	1.01108	1.02182	1.01799	0.991053	1.03027	1.00727	0.991367	0.994616	1.01151	0.0128939	0.00372215
3.20362	185.26	228.797	226.506	170.704	200.524	158.375	200.093	223.824	182.976	179.656	337.344	177.898		3.20362	170.26	213.797	211.506	155.704	185.524	143.375	185.093	208.824	167.976	164.656	322.344	162.898		3.20362	1.03993	1.00808	1.00541	1.01976	1.03969	1.03146	1.00491	1.00674	1.00352	1.02791	1.00745	1.01744	1.01769	0.0138457	0.00399692
3.22483	184.555	229.434	227.068	167.533	201.176	155	204.468	230.23	185.73	181.105	335.431	178.121		3.22483	169.555	214.434	212.068	152.533	186.176	140	189.468	215.23	170.73	166.105	320.431	163.121		3.22483	1.03562	1.01108	1.00808	0.998994	1.04334	1.00718	1.02866	1.03762	1.01998	1.03695	1.00147	1.01883	1.02065	0.0154575	0.00446218
3.24605	179.228	230.248	222.365	173.421	202.426	156.333	200.168	228.277	187.969	180.155	336.845	177.543		3.24605	164.228	215.248	207.365	158.421	187.426	141.333	185.168	213.277	172.969	165.155	321.845	162.543		3.24605	1.00308	1.01492	0.985724	1.03756	1.05034	1.01677	1.00532	1.0282	1.03335	1.03102	1.00589	1.01522	1.01895	0.0178825	0.00516224
3.26726	180.267	229.851	224.93	170.656	197.384	159.75	201.358	229.167	187.35	174.83	340.207	172.697		3.26726	165.267	214.851	209.93	155.656	182.384	144.75	186.358	214.167	172.35	159.83	325.207	157.697		3.26726	1.00943	1.01305	0.997917	1.01945	1.02209	1.04136	1.01178	1.03249	1.02966	0.997779	1.0164	0.984954	1.0147	0.016019	0.0046243
3.28848	179.762	227.606	227.521	170.325	199.26	156.542	198.347	225.039	188.346	175.449	337.165	174.833		3.28848	164.762	212.606	212.521	155.325	184.26	141.542	183.347	210.039	173.346	160.449	322.165	159.833		3.28848	1.00634	1.00246	1.01023	1.01728	1.0326	1.01828	0.995429	1.01259	1.03561	1.00164	1.00689	0.998295	1.01147	0.0126771	0.00365958
3.3097	177.842	229.144	226.751	165.888	198.273	154.999	198.637	220.531	187.238	171.263	331.533	172.393		3.3097	162.842	214.144	211.751	150.888	183.273	139.999	183.637	205.531	172.238	156.263	316.533	157.393		3.3097	0.994618	1.00971	1.00657	0.98822	1.02707	1.00718	0.997004	0.99086	1.02899	0.975511	0.989288	0.983055	0.99984	0.0165794	0.00478607
3.33091	176.042	225.297	228.159	167.74	198.916	158.56	198.295	221.414	190.932	174.923	339.863	172.728		3.33091	161.042	210.297	213.159	152.74	183.916	143.56	183.295	206.414	175.932	159.923	324.863	157.728		3.33091	0.983623	0.991575	1.01327	1.00035	1.03067	1.03279	0.995147	0.995117	1.05106	0.998359	1.01532	0.985147	1.0077	0.0211742	0.00611246
3.35213	172.738	226.809	224.733	168.017	195.802	155.134	201.494	224.176	187.931	178.739	338.292	175.985		3.35213	157.738	211.809	209.733	153.017	180.802	140.134	186.494	209.176	172.931	163.739	323.292	160.985		3.35213	0.963443	0.998704	0.996981	1.00216	1.01322	1.00815	1.01251	1.00843	1.03313	1.02218	1.01041	1.00549	1.00624	0.0167395	0.00483227
3.37334	177.241	230.92	226.03	166.899	199.566	153.7	203.649	227.178	184.38	178.257	337.245	176.183		3.37334	162.241	215.92	211.03	151.899	184.566	138.7	188.649	212.178	169.38	163.257	322.245	161.183		3.37334	0.990947	1.01809	1.00315	0.994841	1.03432	0.997831	1.02421	1.02291	1.01191	1.01917	1.00714	1.00673	1.01094	0.0131749	0.00380326
3.39456	177.671	229.221	230.835	165.783	196.45	154.254	200.366	218.493	185.078	177.866	342.414	175.228		3.39456	162.671	214.221	215.835	150.783	181.45	139.254	185.366	203.493	170.078	162.866	327.414	160.228		3.39456	0.993573	1.01008	1.02599	0.987532	1.01685	1.00182	1.00639	0.981035	1.01608	1.01673	1.0233	1.00076	1.00668	0.0141684	0.00409008
3.41578	177.896	226.004	224.135	167.987	199.216	153.116	199.671	221.68	189.809	182.33	334.778	173.712		3.41578	162.896	211.004	209.135	152.987	184.216	138.116	184.671	206.68	174.809	167.33	319.778	158.712		3.41578	0.994947	0.994909	0.994138	1.00197	1.03236	0.993629	1.00262	0.9964	1.04435	1.0446	0.99943	0.991293	1.00755	0.0203252	0.00586739
3.43699	178.581	220.723	218.338	167.477	195.838	157.113	198.127	223.101	188.446	177.112	336.286	177.405		3.43699	163.581	205.723	203.338	152.477	180.838	142.113	183.127	208.101	173.446	162.112	321.286	162.405		3.43699	0.999131	0.970008	0.966582	0.998627	1.01342	1.02238	0.994235	1.00325	1.0362	1.01202	1.00414	1.01436	1.00286	0.019827	0.00572355
3.45821	181.359	227.204	221.255	166.669	201.254	159.649	201.123	228.45	181.468	177.199	334.553	169.772		3.45821	166.359	212.204	206.255	151.669	186.254	144.649	186.123	213.45	166.468	162.199	319.553	154.772		3.45821	1.0161	1.00057	0.980448	0.993335	1.04378	1.04063	1.0105	1.02904	0.994516	1.01257	0.998727	0.966685	1.00724	0.0231146	0.00667262
3.47942	178.103	234.448	221.531	164.24	197.084	155.937	199.743	226.927	183.54	178.443	336.335	177.417		3.47942	163.103	219.448	206.531	149.24	182.084	140.937	184.743	211.927	168.54	163.443	321.335	162.417		3.47942	0.996212	1.03472	0.98176	0.977427	1.02041	1.01392	1.00301	1.0217	1.00689	1.02033	1.0043	1.01443	1.00793	0.0167502	0.00483537
3.50064	176.047	230.83	225.727	169.547	201.124	159.491	199.512	224.082	180.615	179.615	340.504	173.737		3.50064	161.047	215.83	210.727	154.547	186.124	144.491	184.512	209.082	165.615	164.615	325.504	158.737		3.50064	0.983654	1.01766	1.00171	1.01218	1.04305	1.03949	1.00175	1.00798	0.989419	1.02765	1.01733	0.991449	1.01111	0.0190179	0.00549
3.52186	178.225	230.776	232.887	167.754	198.507	159.009	200.317	222.775	186.688	177.273	333.984	170.711		3.52186	163.225	215.776	217.887	152.754	183.507	144.009	185.317	207.775	171.688	162.273	318.984	155.711		3.52186	0.996957	1.01741	1.03574	1.00044	1.02838	1.03602	1.00612	1.00168	1.0257	1.01303	0.996948	0.972549	1.01092	0.0188221	0.00543347
3.54307	179.535	226.699	229.261	164.445	198.447	157.467	201.496	222.391	181.246	176.358	342.216	177.164		3.54307	164.535	211.699	214.261	149.445	183.447	142.467	186.496	207.391	166.246	161.358	327.216	162.164		3.54307	1.00496	0.998186	1.01851	0.978769	1.02805	1.02493	1.01253	0.999827	0.993189	1.00732	1.02268	1.01285	1.00848	0.0144667	0.00417617
3.56429	178.588	226.397	229.218	168.16	195.481	154.112	203.038	221.695	184.656	172.717	332.862	177.947		3.56429	163.588	211.397	214.218	153.16	180.481	139.112	188.038	206.695	169.656	157.717	317.862	162.947		3.56429	0.999174	0.996762	1.0183	1.0031	1.01142	1.00079	1.0209	0.996472	1.01356	0.984588	0.993442	1.01774	1.00469	0.0114873	0.0033161
3.5855	181.48	221.187	226.889	172.468	195.601	157.831	199.964	223.583	184.174	176.247	335.079	174.759		3.5855	166.48	206.187	211.889	157.468	180.601	142.831	184.964	208.583	169.174	161.247	320.079	159.759		3.5855	1.01684	0.972196	1.00723	1.03131	1.0121	1.02755	1.00421	1.00557	1.01068	1.00662	1.00037	0.997833	1.00771	0.0150547	0.00434593
3.60672	178.838	226.848	229.234	174.452	194.624	156.221	198.654	228.384	181.215	175.185	339.627	178.044		3.60672	163.838	211.848	214.234	159.452	179.624	141.221	183.654	213.384	166.215	160.185	324.627	163.044		3.60672	1.0007	0.998888	1.01838	1.04431	1.00662	1.01597	0.997096	1.02872	0.993004	0.999995	1.01459	1.01835	1.01138	0.0150087	0.00433263
3.62794	179.867	225.586	223.478	169.854	199.886	154.017	198.82	226.78	180.099	175.054	342.287	175.602		3.62794	164.867	210.586	208.478	154.854	184.886	139.017	183.82	211.78	165.099	160.054	327.287	160.602		3.62794	1.00699	0.992938	0.991015	1.01419	1.03611	1.00011	0.997997	1.02099	0.986337	0.999177	1.0229	1.0031	1.00599	0.0148336	0.00428208
3.64915	178.125	232.037	224.747	167.548	195.966	153.762	201.757	223.999	181.592	172.096	339.48	173.716		3.64915	163.125	217.037	209.747	152.548	180.966	138.762	186.757	208.999	166.592	157.096	324.48	158.716		3.64915	0.996346	1.02336	0.997047	0.999092	1.01414	0.998277	1.01394	1.00758	0.995256	0.980711	1.01413	0.991318	1.0026	0.0121039	0.00349409
3.67037	181.204	236.332	220.699	168.158	197.14	156.037	200.118	222.304	178.321	176.671	337.075	176.312		3.67037	166.204	221.332	205.699	153.158	182.14	141.037	185.118	207.304	163.321	161.671	322.075	161.312		3.67037	1.01515	1.04361	0.977805	1.00309	1.02072	1.01464	1.00504	0.999408	0.975715	1.00927	1.00661	1.00753	1.00655	0.0180006	0.00519633
3.69158	179.495	234.054	231.955	170.164	198.631	149.867	199.932	223.08	180.364	174.988	335.471	173.525		3.69158	164.495	219.054	216.955	155.164	183.631	134.867	184.932	208.08	165.364	159.988	320.471	158.525		3.69158	1.00471	1.03287	1.03131	1.01623	1.02908	0.970255	1.00403	1.00315	0.98792	0.998765	1.0016	0.990125	1.00584	0.0189284	0.00546416
3.7128	179.852	232.44	223.812	169.561	193.964	157.848	198.672	220.781	183.95	177.199	334.045	175.141		3.7128	164.852	217.44	208.812	154.561	178.964	142.848	183.672	205.781	168.95	162.199	319.045	160.141		3.7128	1.00689	1.02526	0.992603	1.01228	1.00292	1.02767	0.997194	0.992065	1.00934	1.01257	0.997139	1.00022	1.00635	0.0117013	0.00337787
3.73402	176.625	226.738	223.326	170.194	194.794	157.453	196.884	218.824	184.922	175.108	341.873	176.087		3.73402	161.625	211.738	208.326	155.194	179.794	142.453	181.884	203.824	169.922	160.108	326.873	161.087		3.73402	0.987184	0.99837	0.990293	1.01642	1.00757	1.02483	0.987486	0.982631	1.01515	0.999514	1.0216	1.00613	1.0031	0.0144028	0.00415772
3.75523	179.859	227.949	224.364	170.122	194.014	151.671	196.178	221.631	180.391	174.653	347.131	180.675		3.75523	164.859	212.949	209.364	155.122	179.014	136.671	181.178	206.631	165.391	159.653	332.131	165.675		3.75523	1.00694	1.00408	0.995227	1.01595	1.0032	0.983234	0.983653	0.996163	0.988081	0.996674	1.03804	1.03478	1.00384	0.0179611	0.00518493
3.77645	175.532	228.446	225.162	168.905	191.518	153.474	197.822	219.602	186.999	175.414	336.729	177.722		3.77645	160.532	213.446	210.162	153.905	176.518	138.474	182.822	204.602	171.999	160.414	321.729	162.722		3.77645	0.980508	1.00642	0.99902	1.00798	0.989215	0.996205	0.992579	0.986382	1.02756	1.00142	1.00553	1.01634	1.00076	0.0131741	0.00380302
3.79766	179.057	226.824	228.316	166.544	187.012	153.465	198.836	220.476	183.398	173.325	342.902	178.3		3.79766	164.057	211.824	213.316	151.544	172.012	138.465	183.836	205.476	168.398	158.325	327.902	163.3		3.79766	1.00204	0.998775	1.01401	0.992516	0.963963	0.99614	0.998084	0.990595	1.00605	0.988383	1.02482	1.01995	0.99961	0.016089	0.00464449
3.81888	178.076	226.015	225.529	169.279	191.725	151.687	199.234	221.082	176.321	174.531	331.952	178.251		3.81888	163.076	211.015	210.529	154.279	176.725	136.687	184.234	206.082	161.321	159.531	316.952	163.251		3.81888	0.996047	0.994961	1.00076	1.01043	0.990375	0.983349	1.00024	0.993517	0.963766	0.995912	0.990598	1.01964	0.994967	0.0136923	0.00395262
3.8401	178.906	227.89	226.092	169.075	187.72	153.926	199.254	222.43	179.946	172.637	322.821	178.752		3.8401	163.906	212.89	211.092	154.075	172.72	138.926	184.254	207.43	164.946	157.637	307.821	163.752		3.8401	1.00112	1.0038	1.00344	1.00909	0.967931	0.999457	1.00035	1.00002	0.985423	0.984088	0.96206	1.02277	0.994963	0.0172107	0.00496829
3.86131	176.653	226.773	226.055	166.713	193.746	151.123	198.252	223.003	182.888	176.923	331.289	175.626		3.86131	161.653	211.773	211.055	151.713	178.746	136.123	183.252	208.003	167.888	161.923	316.289	160.626		3.86131	0.987355	0.998535	1.00327	0.993623	1.0017	0.979291	0.994913	1.00278	1.003	1.01084	0.988526	1.00325	0.997257	0.00882761	0.00254831
3.88253	181.038	228.019	228.135	161.047	188.176	153.182	195.369	222.809	184.008	172.875	329.601	175.282		3.88253	166.038	213.019	213.135	146.047	173.176	138.182	180.369	207.809	169.008	157.875	314.601	160.282		3.88253	1.01414	1.00441	1.01315	0.956514	0.970486	0.994104	0.979261	1.00184	1.00969	0.985574	0.98325	1.0011	0.992794	0.0180485	0.00521014
3.90374	181.055	223.103	225.564	163.293	190.345	153.21	199.692	223.338	184.419	175.133	335.521	175.736		3.90374	166.055	208.103	210.564	148.293	175.345	138.21	184.692	208.338	169.419	160.133	320.521	160.736		3.90374	1.01424	0.98123	1.00093	0.971224	0.982642	0.994306	1.00273	1.00439	1.01215	0.99967	1.00175	1.00393	0.997433	0.0129041	0.0037251
3.92496	182.026	227.209	220.802	164.35	192.468	155.955	197.431	218.469	183.833	172.698	340.327	172.555		3.92496	167.026	212.209	205.802	149.35	177.468	140.955	182.431	203.469	168.833	157.698	325.327	157.555		3.92496	1.02017	1.00059	0.978295	0.978147	0.994539	1.01405	0.990456	0.980919	1.00864	0.984469	1.01677	0.984067	0.995927	0.0156395	0.00451472
3.94618	180.299	227.199	223.494	167.98	193.925	148.856	195.276	220.265	181.72	176.76	325.926	176.207		3.94618	165.299	212.199	208.494	152.98	178.925	133.856	180.276	205.265	166.72	161.76	310.926	161.207		3.94618	1.00962	1.00054	0.991091	1.00192	1.0027	0.962982	0.978756	0.989578	0.996021	1.00983	0.971764	1.00688	0.993474	0.0152538	0.0044034
3.96739	178.518	225.93	224.829	165.86	188.738	154.548	195.457	224.237	181.365	177.95	329.921	178.64		3.96739	163.518	210.93	209.829	150.86	173.738	139.548	180.457	209.237	166.365	162.95	314.921	163.64		3.96739	0.998746	0.99456	0.997437	0.988037	0.973636	1.00393	0.979739	1.00873	0.9939	1.01726	0.98425	1.02207	0.996858	0.0145534	0.00420122
3.98861	177.505	227.509	218.878	166.391	185.136	150.202	199.492	220.427	181.152	174.949	330.053	176.4		3.98861	162.505	212.509	203.878	151.391	170.136	135.202	184.492	205.427	166.152	159.949	315.053	161.4		3.98861	0.992559	1.00201	0.969149	0.991514	0.95345	0.972665	1.00165	0.990359	0.992628	0.998522	0.984663	1.00808	0.988103	0.0158162	0.00456575
4.00982	179.156	223.702	220.311	165.911	190.912	149.627	199.217	219.968	183.036	178.087	327.202	172.662		4.00982	164.156	208.702	205.311	150.911	175.912	134.627	184.217	204.968	168.036	163.087	312.202	157.662		4.00982	1.00264	0.984055	0.975961	0.988371	0.985819	0.968529	1.00015	0.988146	1.00388	1.01811	0.975752	0.984735	0.98968	0.0141178	0.00407547
4.03104	176.202	226.738	225.622	165.684	195.402	153.711	199.117	222.101	181.408	176.993	336.236	175.133		4.03104	161.202	211.738	210.622	150.684	180.402	138.711	184.117	207.101	166.408	161.993	321.236	160.133		4.03104	0.984601	0.99837	1.00121	0.986884	1.01098	0.99791	0.99961	0.998429	0.994157	1.01128	1.00399	1.00017	0.998965	0.00800774	0.00231164
4.05226	177.411	225.182	230.777	165.816	190.888	154.039	202.102	216.594	185.954	173.612	330.005	171.891		4.05226	162.411	210.182	215.777	150.816	175.888	139.039	187.102	201.594	170.954	158.612	315.005	156.891		4.05226	0.991985	0.991033	1.02571	0.987748	0.985685	1.00027	1.01582	0.97188	1.02132	0.990175	0.984513	0.97992	0.995504	0.0169307	0.00488748
4.07347	176.85	222.867	221.051	169.769	190.409	152.602	202.72	223.155	184.675	177.357	340.521	171.462		4.07347	161.85	207.867	206.051	154.769	175.409	137.602	187.72	208.155	169.675	162.357	325.521	156.462		4.07347	0.988559	0.980117	0.979478	1.01364	0.983	0.989931	1.01917	1.00351	1.01367	1.01355	1.01738	0.97724	0.998271	0.0166746	0.00481355
4.09469	182.018	226.03	229.221	165.665	195.572	157.956	198.392	223.94	181.775	174.444	339.894	171.092		4.09469	167.018	211.03	214.221	150.665	180.572	142.956	183.392	208.94	166.775	159.444	324.894	156.092		4.09469	1.02012	0.995031	1.01831	0.986759	1.01193	1.02845	0.995673	1.00729	0.99635	0.995369	1.01542	0.974929	1.0038	0.0156424	0.00451559
4.1159	178.834	225.71	223.842	168.11	190.046	156.141	200.652	223.29	184.112	174.878	336.074	172.658		4.1159	163.834	210.71	208.842	153.11	175.046	141.141	185.652	208.29	169.112	159.878	321.074	157.658		4.1159	1.00068	0.993523	0.992746	1.00277	0.980966	1.01539	1.00794	1.00416	1.01031	0.998078	1.00348	0.98471	0.999563	0.0101622	0.00293356
4.13712	174.141	224.949	228.319	168.533	192.079	152.364	196.066	223.749	182.329	174.623	333.102	173.368		4.13712	159.141	209.949	213.319	153.533	177.079	137.364	181.066	208.749	167.329	159.623	318.102	158.368		4.13712	0.972012	0.989934	1.01403	1.00554	0.992359	0.988219	0.983045	1.00637	0.999659	0.996487	0.994192	0.989145	0.99425	0.0113002	0.00326208
4.15834	178.57	224.552	223.256	165.297	190.802	150.672	201.271	223.104	185.027	174.662	326.166	171.944		4.15834	163.57	209.552	208.256	150.297	175.802	135.672	186.271	208.104	170.027	159.662	311.166	156.944		4.15834	0.999064	0.988062	0.98996	0.984349	0.985203	0.976047	1.0113	1.00326	1.01578	0.99673	0.972514	0.980251	0.991877	0.013597	0.00392512
4.17955	180.186	228.743	221.959	168.784	192.876	153.242	202.128	224.307	182.699	174.261	333.676	170.68		4.17955	165.186	213.743	206.959	153.784	177.876	138.242	187.128	209.307	167.699	159.261	318.676	155.68		4.17955	1.00893	1.00782	0.983795	1.00719	0.996825	0.994536	1.01596	1.00906	1.00187	0.994227	0.995986	0.972356	0.999047	0.0122038	0.00352293
4.20077	177.037	220.577	225.075	167.34	197.724	152.659	196.789	223.338	181.417	172.575	332.319	176.173		4.20077	162.037	205.577	210.075	152.34	182.724	137.659	181.789	208.338	166.417	157.575	317.319	161.173		4.20077	0.989701	0.96932	0.998607	0.99773	1.02399	0.990342	0.98697	1.00439	0.994211	0.983701	0.991745	1.00666	0.994781	0.0134753	0.00388998
4.22198	178.503	226.092	219.998	166.26	195.089	152.627	201.701	224.946	176.797	173.652	329.742	174.756		4.22198	163.503	211.092	204.998	151.26	180.089	137.627	186.701	209.946	161.797	158.652	314.742	159.756		4.22198	0.998655	0.995324	0.974473	0.990656	1.00923	0.990111	1.01364	1.01214	0.96661	0.990425	0.983691	0.997814	0.993564	0.0143317	0.00413719
4.264	82.532	99.319	110.551	78.867	90.176	70.65	90.308	96.369	90.931	80.001	148.682	83.472		4.264	67.532	84.319	95.551	63.867	75.176	55.65	75.308	81.369	75.931	65.001	133.682	68.472		4.264	0.412477	0.397574	0.454209	0.418288	0.42129	0.400355	0.408863	0.392278	0.453628	0.405785	0.417808	0.427667	0.417518	0.0198526	0.00573096
4.28522	94.065	116.803	120.649	87.963	101.369	78.151	99.172	109.746	98.433	88.841	182.287	95.521		4.28522	79.065	101.803	105.649	72.963	86.369	63.151	84.172	94.746	83.433	73.841	167.287	80.521		4.28522	0.482919	0.480013	0.50221	0.477861	0.484016	0.454319	0.456987	0.456768	0.498447	0.460971	0.522837	0.502923	0.481689	0.0219087	0.00632451
4.30643	100.356	126.507	130.197	92.813	107.509	78.994	105.796	114.964	101.405	96.119	192.97	95.879		4.30643	85.356	111.507	115.197	77.813	92.509	63.994	90.796	99.964	86.405	81.119	177.97	80.879		4.30643	0.521343	0.525769	0.547597	0.509625	0.518425	0.460383	0.49295	0.481924	0.516202	0.506406	0.556225	0.505159	0.511834	0.0262401	0.00757486
4.32765	102.763	130.461	137.67	95.06	110.104	83.667	109.261	115.954	105.311	98.407	199.527	100.822		4.32765	87.763	115.461	122.67	80.06	95.104	68.667	94.261	100.954	90.311	83.407	184.527	85.822		4.32765	0.536045	0.544412	0.583121	0.524342	0.532967	0.494002	0.511763	0.486697	0.539537	0.520689	0.576718	0.536032	0.532194	0.0285234	0.00823399
4.34886	104.768	131.427	142.514	97.542	112.226	82.241	112.32	122.007	109.366	102.296	205.45	104.494		4.34886	89.768	116.427	127.514	82.542	97.226	67.241	97.32	107.007	94.366	87.296	190.45	89.494		4.34886	0.548291	0.548967	0.606147	0.540597	0.544859	0.483743	0.528371	0.515878	0.563763	0.544967	0.59523	0.558967	0.548315	0.0324742	0.00937448
4.37008	104.067	137.919	141.038	97.302	115.658	84.865	112.338	122.03	114.158	106.649	203.403	106.457		4.37008	89.067	122.919	126.038	82.302	100.658	69.865	97.338	107.03	99.158	91.649	188.403	91.457		4.37008	0.54401	0.579578	0.599131	0.539025	0.564092	0.50262	0.528468	0.515989	0.592391	0.572142	0.588832	0.571228	0.558126	0.0315685	0.00911305
4.3913	107.477	139.04	148.613	99.721	116.272	88.781	115.084	125.068	112.072	107	208.79	110.924		4.3913	92.477	124.04	133.613	84.721	101.272	73.781	100.084	110.068	97.072	92	193.79	95.924		4.3913	0.564837	0.584863	0.635139	0.554868	0.567533	0.530793	0.543377	0.530635	0.579929	0.574333	0.605669	0.599128	0.572592	0.0311576	0.00899442
4.41251	108.855	143.637	144.655	100.833	118.56	88.716	117.638	124.231	117.167	106.337	212.207	111.697		4.41251	93.855	128.637	129.655	85.833	103.56	73.716	102.638	109.231	102.167	91.337	197.207	96.697		4.41251	0.573254	0.606539	0.616324	0.562151	0.580355	0.530325	0.557243	0.5266	0.610368	0.570194	0.616348	0.603956	0.579471	0.0318163	0.00918459
4.43373	109.526	140.373	149.231	100.836	117.98	91.451	119.535	129.505	120.859	110.75	215.196	111.952		4.43373	94.526	125.373	134.231	85.836	102.98	76.451	104.535	114.505	105.859	95.75	200.196	96.952		4.43373	0.577352	0.591148	0.638077	0.562171	0.577105	0.550001	0.567542	0.552026	0.632424	0.597743	0.62569	0.605549	0.589736	0.0306508	0.00884812
4.45494	114.337	143.163	150.685	102.98	123.194	92.848	119.377	129.181	120.822	107.318	216.282	113.108		4.45494	99.337	128.163	135.685	87.98	108.194	77.848	104.377	114.181	105.822	92.318	201.282	98.108		4.45494	0.606737	0.604304	0.644988	0.576213	0.606324	0.560051	0.566684	0.550464	0.632203	0.576318	0.629084	0.612769	0.597178	0.0306959	0.00886114
4.47616	111.13	146.492	151.893	107.208	120.32	92.487	118.164	133.063	123.696	108.719	217.45	113.023		4.47616	96.13	131.492	136.893	92.208	105.32	77.487	103.164	118.063	108.696	93.719	202.45	98.023		4.47616	0.587149	0.62	0.650731	0.603903	0.590218	0.557454	0.560099	0.569179	0.649373	0.585064	0.632735	0.612238	0.601512	0.0322723	0.00931622
4.49738	110.046	150.023	153.954	106.426	123.505	92.887	119.206	130.226	122.273	114.094	228.103	110.906		4.49738	95.046	135.023	138.954	91.426	108.505	77.887	104.206	115.226	107.273	99.094	213.103	95.906		4.49738	0.580528	0.636649	0.660528	0.598782	0.608067	0.560332	0.565756	0.555502	0.640872	0.618619	0.666029	0.599016	0.607557	0.0379851	0.0109654
4.51859	112.513	147.166	155.383	108.476	122.713	95.631	119.456	132.739	123.86	112.015	232.926	113.85		4.51859	97.513	132.166	140.383	93.476	107.713	80.631	104.456	117.739	108.86	97.015	217.926	98.85		4.51859	0.595597	0.623178	0.667321	0.612208	0.603629	0.580073	0.567113	0.567617	0.650353	0.60564	0.681103	0.617403	0.61427	0.0366588	0.0105825
4.53981	113.723	146.637	158.3	109.421	125.704	95.218	122.722	135.257	124.693	109.358	228.237	114.978		4.53981	98.723	131.637	143.3	94.421	110.704	80.218	107.722	120.257	109.693	94.358	213.237	99.978		4.53981	0.602987	0.620684	0.681187	0.618397	0.62039	0.577102	0.584845	0.579756	0.655329	0.589053	0.666448	0.624449	0.618386	0.0344884	0.00995595
4.56102	113.173	148.411	155.726	108.12	126.762	95.43	120.614	132.061	124.116	114.807	227.668	113.146		4.56102	98.173	133.411	140.726	93.12	111.762	80.43	105.614	117.061	109.116	99.807	212.668	98.146		4.56102	0.599628	0.629049	0.668951	0.609876	0.626319	0.578627	0.5734	0.564348	0.651882	0.62307	0.66467	0.613006	0.616902	0.0343392	0.00991287
4.58224	112.869	147.901	159.006	105.731	132.495	96.803	123.494	134.15	124.81	113.074	238.676	115.743		4.58224	97.869	132.901	144.006	90.731	117.495	81.803	108.494	119.15	109.81	98.074	223.676	100.743		4.58224	0.597771	0.626644	0.684543	0.59423	0.658447	0.588504	0.589037	0.574419	0.656028	0.612252	0.699074	0.629227	0.625848	0.0406316	0.0117293
4.60346	114.033	152.952	158.195	109.663	129.554	98.694	126.968	133.218	126.293	115.165	229.16	116.441		4.60346	99.033	137.952	143.195	94.663	114.554	83.694	111.968	118.218	111.293	100.165	214.16	101.441		4.60346	0.604881	0.65046	0.680688	0.619982	0.641966	0.602108	0.607898	0.569926	0.664888	0.625305	0.669333	0.633586	0.630918	0.0323711	0.00934472
4.62467	111.804	152.068	161.348	109.337	130.818	101.055	123.723	133.394	127.418	112.408	235.903	118.396		4.62467	96.804	137.068	146.348	94.337	115.818	86.055	108.723	118.394	112.418	97.408	220.903	103.396		4.62467	0.591266	0.646292	0.695676	0.617847	0.649049	0.619094	0.59028	0.570775	0.671609	0.608094	0.690407	0.645797	0.633016	0.0402205	0.0116107
4.64589	116.361	157.247	160.611	109.609	126.372	96.446	127.251	134.464	124.202	115.212	233.301	114.305		4.64589	101.361	142.247	145.611	94.609	111.372	81.446	112.251	119.464	109.202	100.212	218.301	99.305		4.64589	0.6191	0.670711	0.692172	0.619628	0.624134	0.585936	0.609434	0.575933	0.652396	0.625599	0.682275	0.620245	0.631464	0.0361745	0.0104427
4.6671	114.596	156.131	159.651	107.814	126.916	98.672	125.972	138.388	127.415	112.816	237.196	116.783		4.6671	99.596	141.131	144.651	92.814	111.916	83.672	110.972	123.388	112.415	97.816	222.196	101.783		4.6671	0.608319	0.665449	0.687609	0.607872	0.627182	0.60195	0.60249	0.594851	0.671591	0.610641	0.694449	0.635723	0.634011	0.0362066	0.0104519
4.68832	116.609	151.072	162.02	109.765	125.137	98.772	125.307	137.933	127.993	113	233.423	117.007		4.68832	101.609	136.072	147.02	94.765	110.137	83.772	110.307	122.933	112.993	98	218.423	102.007		4.68832	0.620614	0.641596	0.69887	0.62065	0.617213	0.60267	0.59888	0.592657	0.675044	0.61179	0.682656	0.637122	0.633313	0.0348748	0.0100675
4.70954	117.341	153.897	159.12	109.523	131.146	97.988	129.919	134.453	127.044	113.365	239.202	118.112		4.70954	102.341	138.897	144.12	94.523	116.146	82.988	114.919	119.453	112.044	98.365	224.202	103.112		4.70954	0.625085	0.654916	0.685085	0.619065	0.650888	0.597029	0.623919	0.57588	0.669375	0.614068	0.700718	0.644023	0.638338	0.0362514	0.0104649
4.73075	116.292	156.106	157.899	112.185	130.871	100.505	126.5	138.276	131.343	115.26	240.99	118.774		4.73075	101.292	141.106	142.899	97.185	115.871	85.505	111.5	123.276	116.343	100.26	225.99	103.774		4.73075	0.618678	0.665331	0.679281	0.6365	0.649346	0.615137	0.605357	0.594311	0.695058	0.625898	0.706306	0.648158	0.644947	0.0357318	0.0103149
4.75197	113.492	159.097	162.785	108.574	130.392	98.764	125.295	137.118	130.451	113.401	240.752	115.831		4.75197	98.492	144.097	147.785	93.574	115.392	83.764	110.295	122.118	115.451	98.401	225.752	100.831		4.75197	0.601576	0.679434	0.702507	0.61285	0.646662	0.602612	0.598815	0.588728	0.689729	0.614293	0.705562	0.629777	0.639379	0.0436672	0.0126056
4.77318	114.129	156.986	162.88	111.523	127.5	99.592	127.71	137.466	128.483	116.315	242.559	118.275		4.77318	99.129	141.986	147.88	96.523	112.5	84.592	112.71	122.466	113.483	101.315	227.559	103.275		4.77318	0.605467	0.669481	0.702958	0.632164	0.630455	0.608569	0.611926	0.590406	0.677972	0.632484	0.71121	0.645041	0.643178	0.0391814	0.0113107
4.7944	115.028	154.445	159.934	112.384	128.315	98.952	132.421	139.507	126.735	113.383	238.746	121.459		4.7944	100.028	139.445	144.934	97.384	113.315	83.952	117.421	124.507	111.735	98.383	223.746	106.459		4.7944	0.610958	0.6575	0.688954	0.637803	0.635023	0.603965	0.637503	0.600245	0.667529	0.614181	0.699293	0.664928	0.643157	0.0328951	0.009496
4.81562	116.741	158.937	162.801	110.88	127.129	99.834	133.132	140.776	129.41	116.811	235.719	121.765		4.81562	101.741	143.937	147.801	95.88	112.129	84.834	118.132	125.776	114.41	101.811	220.719	106.765		4.81562	0.621421	0.67868	0.702583	0.627953	0.628376	0.61031	0.641363	0.606363	0.68351	0.635581	0.689832	0.666839	0.649401	0.0331782	0.00957772
4.83683	116.054	157.822	170.939	116.198	131.631	101.429	131.229	138.691	129.669	115.007	239.841	120.614		4.83683	101.054	142.822	155.939	101.198	116.631	86.429	116.229	123.691	114.669	100.007	224.841	105.614		4.83683	0.617225	0.673423	0.741267	0.662782	0.653606	0.621784	0.631031	0.596311	0.685057	0.624319	0.702715	0.65965	0.655764	0.0410423	0.0118479
4.85805	116.75	154.635	169.373	110.27	130.957	102.621	129.334	139.793	128.252	114.677	240.887	121.352		4.85805	101.75	139.635	154.373	95.27	115.957	87.621	114.334	124.793	113.252	99.677	225.887	106.352		4.85805	0.621476	0.658395	0.733823	0.623958	0.649828	0.63036	0.620743	0.601624	0.676592	0.622259	0.705984	0.66426	0.650775	0.0392865	0.011341
4.87926	116.979	159.295	164.973	110.223	130.808	105.063	129.807	139.541	128.163	116.608	242.701	122.731		4.87926	101.979	144.295	149.973	95.223	115.808	90.063	114.807	124.541	113.163	101.608	227.701	107.731		4.87926	0.622874	0.680368	0.712907	0.62365	0.648993	0.647928	0.623311	0.600409	0.67606	0.634313	0.711654	0.672873	0.654612	0.0362828	0.0104739
4.90048	115.736	158.178	168.001	112.453	127.327	101.139	131.065	144.135	131.367	117.982	243.143	123.359		4.90048	100.736	143.178	153.001	97.453	112.327	86.139	116.065	129.135	116.367	102.982	228.143	108.359		4.90048	0.615282	0.675101	0.727301	0.638255	0.629486	0.619698	0.630141	0.622557	0.695201	0.642891	0.713035	0.676795	0.657145	0.0388562	0.0112168
4.9217	117.056	158.534	169.247	115.153	133.347	102.347	131.757	141.194	132.189	115.523	250.239	121.019		4.9217	102.056	143.534	154.247	100.153	118.347	87.347	116.757	126.194	117.189	100.523	235.239	106.019		4.9217	0.623345	0.67678	0.733224	0.655938	0.663222	0.628389	0.633898	0.608378	0.700112	0.62754	0.735213	0.66218	0.662352	0.0422301	0.0121908
4.94291	115.065	162.464	167.855	114.657	131.04	100.554	129.822	141.679	136.26	116.84	244.847	123.291		4.94291	100.065	147.464	152.855	99.657	116.04	85.554	114.822	126.679	121.26	101.84	229.847	108.291		4.94291	0.611184	0.69531	0.726607	0.65269	0.650294	0.61549	0.623393	0.610717	0.724433	0.635762	0.718361	0.676371	0.661717	0.0450675	0.0130099
4.96413	115.473	154.844	172.192	113.39	132.052	103.7	131.766	140.853	126.591	114.766	247.184	123.22		4.96413	100.473	139.844	157.192	98.39	117.052	88.7	116.766	125.853	111.591	99.766	232.184	108.22		4.96413	0.613676	0.659381	0.747224	0.644392	0.655965	0.638122	0.633947	0.606734	0.666669	0.622814	0.725665	0.675927	0.657543	0.0425645	0.0122873
4.98534	116.358	158.659	173.373	117.686	130.419	105.357	133.832	139.069	131.752	114.592	248.071	123.217		4.98534	101.358	143.659	158.373	102.686	115.419	90.357	118.832	124.069	116.752	99.592	233.071	108.217		4.98534	0.619081	0.677369	0.752837	0.672528	0.646813	0.650043	0.645164	0.598134	0.697501	0.621728	0.728437	0.675908	0.665462	0.0452489	0.0130622
5.00656	120.979	157.76	169.287	113.273	126.946	104.626	134.4	144.543	131.023	118.47	248.352	127.881		5.00656	105.979	142.76	154.287	98.273	111.946	89.626	119.4	129.543	116.023	103.47	233.352	112.881		5.00656	0.647306	0.67313	0.733414	0.643625	0.627351	0.644784	0.648247	0.624524	0.693146	0.645937	0.729315	0.705039	0.667985	0.038198	0.0110268
5.02778	117.793	159.132	167.808	114.379	129.647	103.152	128.394	143.587	130.408	116.515	249.02	122.691		5.02778	102.793	144.132	152.808	99.379	114.647	88.152	113.394	128.587	115.408	101.515	234.02	107.691		5.02778	0.627846	0.679599	0.726384	0.650869	0.642487	0.63418	0.61564	0.619915	0.689472	0.633733	0.731403	0.672623	0.660346	0.0396245	0.0114386
5.04899	117.801	160.403	171.671	110.391	133.385	102.235	129.695	144.162	133.184	114.727	251.413	124.307		5.04899	102.801	145.403	156.671	95.391	118.385	87.235	114.695	129.162	118.184	99.727	236.413	109.307		5.04899	0.627895	0.685592	0.744747	0.62475	0.663435	0.627583	0.622703	0.622687	0.706057	0.622571	0.738882	0.682716	0.664135	0.0467213	0.0134873
5.07021	122.104	159.327	168.219	117.414	132.6	104.15	132.15	145.807	129.909	115.831	248.729	123.314		5.07021	107.104	144.327	153.219	102.414	117.6	89.15	117.15	130.807	114.909	100.831	233.729	108.314		5.07021	0.654177	0.680519	0.728338	0.670746	0.659036	0.64136	0.636032	0.630618	0.686491	0.629463	0.730494	0.676514	0.668649	0.0343847	0.00992599
5.09142	117.56	158.635	169.978	117.657	129.622	102.447	130.401	143.553	133.443	118.777	248.232	123.235		5.09142	102.56	143.635	154.978	102.657	114.622	87.447	115.401	128.553	118.443	103.777	233.232	108.235		5.09142	0.626423	0.677256	0.736699	0.672338	0.642347	0.629108	0.626536	0.619751	0.707604	0.647854	0.72894	0.676021	0.665906	0.0409771	0.0118291
5.11264	116.548	161.232	173.226	118.288	131.37	103.019	132.625	147.299	132.465	117.353	247.872	125.067		5.11264	101.548	146.232	158.226	103.288	116.37	88.019	117.625	132.299	117.465	102.353	232.872	110.067		5.11264	0.620242	0.689501	0.752139	0.67647	0.652143	0.633223	0.638611	0.63781	0.701761	0.638964	0.727815	0.687463	0.671345	0.0414899	0.0119771
5.13386	120.276	164.408	172.524	114.43	128.242	105.412	131.691	148.101	132.474	118.408	244.361	121.733		5.13386	105.276	149.408	157.524	99.43	113.242	90.412	116.691	133.101	117.474	103.408	229.361	106.733		5.13386	0.643012	0.704476	0.748802	0.651203	0.634613	0.650439	0.63354	0.641677	0.701815	0.64555	0.716842	0.66664	0.669884	0.0382119	0.0110308
5.15507	118.878	162.219	169.41	118.384	129.434	104.65	131.08	146.154	132.737	114.843	245.518	122.876		5.15507	103.878	147.219	154.41	103.384	114.434	89.65	116.08	131.154	117.737	99.843	230.518	107.876		5.15507	0.634473	0.694155	0.733999	0.677099	0.641293	0.644957	0.630223	0.63229	0.703386	0.623295	0.720458	0.673779	0.667451	0.0384065	0.011087
5.17629	118.471	160.925	170.077	115.931	135.492	104.446	132.425	144.997	132.119	116.584	250.609	124.265		5.17629	103.471	145.925	155.077	100.931	120.492	89.446	117.425	129.997	117.119	101.584	235.609	109.265		5.17629	0.631987	0.688054	0.73717	0.661034	0.675243	0.643489	0.637525	0.626713	0.699694	0.634164	0.736369	0.682454	0.671158	0.0390008	0.0112586
5.1975	120.273	163.195	171.837	115.433	135.841	106.158	129.233	144.97	133.853	113.34	255.482	124.761		5.1975	105.273	148.195	156.837	100.433	120.841	91.158	114.233	129.97	118.853	98.34	240.482	109.761		5.1975	0.642994	0.698757	0.745536	0.657772	0.677199	0.655806	0.620195	0.626582	0.710053	0.613912	0.751599	0.685552	0.67383	0.0462256	0.0133442
5.21872	121.15	164.296	173.017	114.128	134.276	105.95	130.223	150.231	134.724	113.457	254.831	119.52		5.21872	106.15	149.296	158.017	99.128	119.276	90.95	115.223	135.231	119.724	98.457	239.831	104.52		5.21872	0.64835	0.703948	0.751145	0.649225	0.668428	0.654309	0.62557	0.651946	0.715257	0.614642	0.749565	0.652818	0.673767	0.0454814	0.0131294
5.23994	121.006	160.949	174.99	116.179	132.454	105.724	132.429	143.966	132.693	113.901	255.279	128.289		5.23994	106.006	145.949	159.99	101.179	117.454	90.724	117.429	128.966	117.693	98.901	240.279	113.289		5.23994	0.647471	0.688167	0.760524	0.662658	0.658218	0.652683	0.637547	0.621742	0.703123	0.617414	0.750965	0.707587	0.675675	0.0470502	0.0135822
5.26115	120.577	161.618	171.291	116.403	132.851	106.317	135.316	144.861	133.678	116.743	253.124	124.086		5.26115	105.577	146.618	156.291	101.403	117.851	91.317	120.316	129.861	118.678	101.743	238.124	109.086		5.26115	0.64485	0.691321	0.742941	0.664125	0.660442	0.65695	0.653221	0.626057	0.709008	0.635156	0.74423	0.681336	0.675803	0.0391806	0.0113105
5.28237	121.19	156.876	170.723	114.319	136.976	103.863	133.122	144.592	131.421	119.422	250.013	125.363		5.28237	106.19	141.876	155.723	99.319	121.976	88.863	118.122	129.592	116.421	104.422	235.013	110.363		5.28237	0.648595	0.668962	0.740241	0.650476	0.683559	0.639295	0.641309	0.62476	0.695524	0.651881	0.734507	0.689312	0.672368	0.0371938	0.0107369
5.30358	123.44	159.983	165.861	117.179	137.875	105.082	129.308	145.502	133.199	120.902	250.031	122.301		5.30358	108.44	144.983	150.861	102.179	122.875	90.082	114.308	130.502	118.199	105.902	235.031	107.301		5.30358	0.662337	0.683612	0.717129	0.669207	0.688597	0.648065	0.620602	0.629147	0.706146	0.66112	0.734563	0.670187	0.674226	0.0340339	0.00982474
5.3248	121.791	162.015	166.801	117.529	135.443	108.087	133.596	146.914	130.499	116.409	251.44	122.777		5.3248	106.791	147.015	151.801	102.529	120.443	93.087	118.596	131.914	115.499	101.409	236.44	107.777		5.3248	0.652265	0.693193	0.721597	0.671499	0.674968	0.669683	0.643882	0.635954	0.690016	0.633071	0.738967	0.67316	0.674855	0.0325169	0.00938683
5.34602	120.346	161.263	171.037	115.449	137.882	102.995	129.673	148.064	131.602	117.865	259.901	123.576		5.34602	105.346	146.263	156.037	100.449	122.882	87.995	114.673	133.064	116.602	102.865	244.901	108.576		5.34602	0.64344	0.689647	0.741733	0.657877	0.688636	0.633051	0.622584	0.641499	0.696605	0.642161	0.76541	0.678151	0.675066	0.0442121	0.0127629
5.36723	122.241	159.014	172.642	116.282	133.329	105.551	134.8	148.4	130.292	120.431	250.912	121.295		5.36723	107.241	144.014	157.642	101.282	118.329	90.551	119.8	133.4	115.292	105.431	235.912	106.295		5.36723	0.655014	0.679043	0.749363	0.663332	0.663121	0.651439	0.650419	0.643118	0.688779	0.658179	0.737316	0.663904	0.675252	0.0342147	0.00987693
5.38845	121.085	161.81	171.043	120.462	130.604	105.356	133.417	149.97	134.568	119.1	255.846	122.963		5.38845	106.085	146.81	156.043	105.462	115.604	90.356	118.417	134.97	119.568	104.1	240.846	107.963		5.38845	0.647953	0.692226	0.741762	0.690709	0.64785	0.650036	0.642911	0.650687	0.714325	0.64987	0.752737	0.674322	0.679616	0.0389395	0.0112409
5.40966	120.431	165.44	172.337	116.872	135.009	105.841	132.621	149.595	136.476	120.393	252.358	122.483		5.40966	105.431	150.44	157.337	101.872	120.009	90.841	117.621	134.595	121.476	105.393	237.358	107.483		5.40966	0.643959	0.709342	0.747913	0.667196	0.672536	0.653525	0.638589	0.648879	0.725724	0.657942	0.741836	0.671324	0.681564	0.0391068	0.0112892
5.43088	117.464	165.852	169.327	118.708	133.901	102.159	135.857	149.643	131.982	117.945	257.136	126.212		5.43088	102.464	150.852	154.327	103.708	118.901	87.159	120.857	134.643	116.982	102.945	242.136	111.212		5.43088	0.625837	0.711285	0.733605	0.679221	0.666327	0.627036	0.656158	0.649111	0.698876	0.64266	0.756769	0.694615	0.678458	0.0417027	0.0120385
5.4521	120.726	167.452	172.752	115.838	135.39	103.821	133.187	149.555	129.985	117.845	254.186	125.722		5.4521	105.726	152.452	157.752	100.838	120.39	88.821	118.187	134.555	114.985	102.845	239.186	110.722		5.4521	0.645761	0.718829	0.749886	0.660424	0.674671	0.638993	0.641662	0.648687	0.686945	0.642036	0.747549	0.691554	0.678916	0.0407647	0.0117677
5.47331	120.315	162.198	172.527	118.479	133.993	103.748	134.712	149.572	132.523	118.254	256.491	123.414		5.47331	105.315	147.198	157.527	103.479	118.993	88.748	119.712	134.572	117.523	103.254	241.491	108.414		5.47331	0.64325	0.694056	0.748816	0.677721	0.666842	0.638468	0.649941	0.648769	0.702108	0.644589	0.754753	0.677139	0.678871	0.0397601	0.0114777
5.49453	122.858	164.292	167.853	114.063	137.54	107.213	135.105	147.717	129.42	119.06	254.291	125.242		5.49453	107.858	149.292	152.853	99.063	122.54	92.213	120.105	132.717	114.42	104.06	239.291	110.242		5.49453	0.658783	0.703929	0.726598	0.648799	0.68672	0.663396	0.652075	0.639826	0.68357	0.649621	0.747877	0.688556	0.679146	0.0336961	0.00972721
5.51574	119.74	166.879	174.313	114.863	136.64	107.925	134.156	147.294	133.199	118.813	259.275	125.629		5.51574	104.74	151.879	159.313	99.863	121.64	92.925	119.156	132.294	118.199	103.813	244.275	110.629		5.51574	0.639738	0.716127	0.757306	0.654039	0.681676	0.668518	0.646923	0.637786	0.706146	0.648079	0.763454	0.690973	0.68423	0.0438592	0.0126611
5.53696	119.957	161.19	174.926	116.56	134.652	105.342	132.773	147.228	127.764	121.801	257.183	126.886		5.53696	104.957	146.19	159.926	101.56	119.652	90.342	117.773	132.228	112.764	106.801	242.183	111.886		5.53696	0.641064	0.689303	0.76022	0.665153	0.670535	0.649935	0.639414	0.637468	0.673676	0.666732	0.756916	0.698825	0.679103	0.0417619	0.0120556
5.55818	121.97	162.18	171.282	117.279	133.385	106.568	134.65	151.051	129.972	122.391	255.164	125.824		5.55818	106.97	147.18	156.282	102.279	118.385	91.568	119.65	136.051	114.972	107.391	240.164	110.824		5.55818	0.653359	0.693971	0.742898	0.669862	0.663435	0.658755	0.649605	0.655899	0.686867	0.670415	0.750605	0.692191	0.682322	0.0335782	0.00969318
5.57939	123.276	162.279	171.554	118.004	137.527	103.436	132.532	146.984	130.205	118.915	256.812	127.095		5.57939	108.276	147.279	156.554	103.004	122.527	88.436	117.532	131.984	115.205	103.915	241.812	112.095		5.57939	0.661336	0.694438	0.744191	0.67461	0.686647	0.636223	0.638106	0.636292	0.688259	0.648715	0.755756	0.70013	0.680392	0.039911	0.0115213
5.60061	123.884	163.654	171.584	118.656	135.192	102.338	131.434	145.252	132.18	123.089	253.756	126.329		5.60061	108.884	148.654	156.584	103.656	120.192	87.338	116.434	130.252	117.18	108.089	238.756	111.329		5.60061	0.665049	0.700921	0.744333	0.678881	0.673562	0.628324	0.632144	0.627942	0.700058	0.674773	0.746205	0.695346	0.680628	0.0399509	0.0115328
5.62182	120.711	162.643	169.636	114.64	136.832	104.266	133.312	147.659	131.531	120.762	253.923	124.23		5.62182	105.711	147.643	154.636	99.64	121.832	89.266	118.312	132.659	116.531	105.762	238.923	109.23		5.62182	0.645669	0.696154	0.735073	0.652578	0.682752	0.642194	0.642341	0.639546	0.696181	0.660246	0.746727	0.682236	0.676808	0.0365606	0.0105541
5.64304	121.055	163.273	171.675	116.208	136.051	102.958	132.352	144.815	132.858	121.195	251.11	126.336		5.64304	106.055	148.273	156.675	101.208	121.051	87.958	117.352	129.815	117.858	106.195	236.11	111.336		5.64304	0.64777	0.699125	0.744766	0.662848	0.678375	0.632784	0.637128	0.625835	0.704109	0.662949	0.737935	0.695389	0.677418	0.0396374	0.0114423
5.66426	124.081	164.795	175.83	113.754	136.401	105.204	133.132	146.876	137.329	122.885	253.823	124.886		5.66426	109.081	149.795	160.83	98.754	121.401	90.204	118.132	131.876	122.329	107.885	238.823	109.886		5.66426	0.666252	0.706301	0.764517	0.646776	0.680337	0.648942	0.641363	0.635771	0.73082	0.673499	0.746414	0.686333	0.68561	0.0428947	0.0123826
5.68547	118.605	164.134	175.241	115.406	135.889	103.009	133.395	150.118	134.045	121.97	257.374	120.653		5.68547	103.605	149.134	160.241	100.406	120.889	88.009	118.395	135.118	119.045	106.97	242.374	105.653		5.68547	0.632806	0.703184	0.761717	0.657595	0.677468	0.633151	0.642791	0.651401	0.7112	0.667787	0.757513	0.659894	0.679709	0.0446014	0.0128753
5.70669	122.988	165.119	176.337	118.209	134.665	102.108	132.872	148.045	135.141	117.294	253.622	122.432		5.70669	107.988	150.119	161.337	103.209	119.665	87.108	117.872	133.045	120.141	102.294	238.622	107.432		5.70669	0.659577	0.707829	0.766927	0.675953	0.670608	0.626669	0.639952	0.641407	0.717748	0.638596	0.745786	0.671005	0.680171	0.0450631	0.0130086
5.7279	120.847	166.082	169.035	115.919	134.952	104.847	132.705	145.715	131.898	120.399	251.87	129.202		5.7279	105.847	151.082	154.035	100.919	119.952	89.847	117.705	130.715	116.898	105.399	236.87	114.202		5.7279	0.6465	0.712369	0.732216	0.660955	0.672217	0.646374	0.639045	0.630174	0.698374	0.65798	0.74031	0.71329	0.67915	0.0383405	0.011068
5.74912	124.238	166.495	171.786	117.737	135.873	101.552	134.457	148.571	132.687	122.822	261.713	130.093		5.74912	109.238	151.495	156.786	102.737	120.873	86.552	119.457	133.571	117.687	107.822	246.713	115.093		5.74912	0.667211	0.714317	0.745294	0.672862	0.677378	0.622669	0.648557	0.643943	0.703087	0.673106	0.771074	0.718855	0.688196	0.0435018	0.0125579
5.77034	124.401	166.489	166.962	119.578	134.82	103.288	134.806	146.916	132.592	118.15	255.461	128.008		5.77034	109.401	151.489	151.962	104.578	119.82	88.288	119.806	131.916	117.592	103.15	240.461	113.008		5.77034	0.668207	0.714289	0.722362	0.684919	0.671477	0.635158	0.650452	0.635964	0.70252	0.64394	0.751534	0.705832	0.682221	0.0376127	0.0108579
5.79155	119.993	165.137	170.808	119.51	137.049	103.1	133.112	146.722	131.053	120.682	255.088	126.868		5.79155	104.993	150.137	155.808	104.51	122.049	88.1	118.112	131.722	116.053	105.682	240.088	111.868		5.79155	0.641283	0.707914	0.740645	0.684474	0.683968	0.633806	0.641255	0.635029	0.693325	0.659746	0.750368	0.698712	0.680877	0.0399198	0.0115239
5.81277	123.408	162.86	173.176	119.68	136.007	102.303	133.929	145.829	133.617	120.341	256.987	127.28		5.81277	108.408	147.86	158.176	104.68	121.007	87.303	118.929	130.829	118.617	105.341	241.987	112.28		5.81277	0.662142	0.697177	0.751901	0.685587	0.678129	0.628072	0.64569	0.630724	0.708643	0.657618	0.756303	0.701285	0.683606	0.0421694	0.0121733
5.83398	124.863	166.919	173.85	119.524	139.027	101.964	132.291	146.232	133.405	119.73	255.227	130.361		5.83398	109.863	151.919	158.85	104.524	124.027	86.964	117.291	131.232	118.405	104.73	240.227	115.361		5.83398	0.671029	0.716316	0.755105	0.684565	0.695053	0.625633	0.636797	0.632666	0.707377	0.653803	0.750802	0.720529	0.687473	0.0444884	0.0128427
5.8552	121.726	164.457	168.405	118.252	140.32	103.168	131.249	147.239	134.92	121.539	251.781	128.383		5.8552	106.726	149.457	153.405	103.252	125.32	88.168	116.249	132.239	119.92	106.539	236.781	113.383		5.8552	0.651868	0.704707	0.729222	0.676235	0.702299	0.634295	0.63114	0.637521	0.716428	0.665096	0.740032	0.708175	0.683085	0.0386703	0.0111632
5.87642	122.086	160.447	168.084	122.506	135.143	106.44	131.733	148.283	134.315	120.042	247.941	134.573		5.87642	107.086	145.447	153.084	107.506	120.143	91.44	116.733	133.283	119.315	105.042	232.941	119.573		5.87642	0.654067	0.6858	0.727696	0.704096	0.673287	0.657834	0.633768	0.642554	0.712813	0.655751	0.728031	0.746836	0.685211	0.03784	0.0109235
5.89763	123.632	165.486	172.984	115.771	137.929	105.328	133.643	149.286	136.342	119.299	254.204	128.802		5.89763	108.632	150.486	157.984	100.771	122.929	90.328	118.643	134.286	121.342	104.299	239.204	113.802		5.89763	0.66351	0.709559	0.750988	0.659986	0.6889	0.649835	0.644138	0.64739	0.724923	0.651113	0.747605	0.710792	0.687395	0.0400446	0.0115599
5.91885	121.957	169.26	175.894	117.991	138.251	102.908	131.656	147.075	134.628	120.852	252.371	131.109		5.91885	106.957	154.26	160.894	102.991	123.251	87.908	116.656	132.075	119.628	105.852	237.371	116.109		5.91885	0.653279	0.727354	0.764821	0.674525	0.690704	0.632425	0.63335	0.636731	0.714683	0.660808	0.741876	0.725201	0.68798	0.0460103	0.013282
5.94006	122.15	164.897	172.19	116.396	135.554	104.159	134.841	146.365	134.663	118.846	253.704	127.058		5.94006	107.15	149.897	157.19	101.396	120.554	89.159	119.841	131.365	119.663	103.846	238.704	112.058		5.94006	0.654458	0.706782	0.747214	0.664079	0.67559	0.641425	0.650642	0.633308	0.714892	0.648285	0.746042	0.699899	0.681885	0.0400326	0.0115564
5.96128	122.182	166.163	173.94	111.074	134.391	104.874	132.81	147.808	136.522	120.299	251.216	125.381		5.96128	107.182	151.163	158.94	96.074	119.391	89.874	117.81	132.808	121.522	105.299	236.216	110.381		5.96128	0.654654	0.712751	0.755533	0.629223	0.669073	0.646568	0.639615	0.640264	0.725998	0.657355	0.738266	0.689425	0.679894	0.0432307	0.0124796
5.9825	125.693	162.984	167.453	117.234	135.07	103.596	134.693	146.842	130.934	123.623	256.453	128.337		5.9825	110.693	147.984	152.453	102.234	120.07	88.596	119.693	131.842	115.934	108.623	241.453	113.337		5.9825	0.676098	0.697762	0.724696	0.669567	0.672878	0.637374	0.649838	0.635607	0.692615	0.678106	0.754634	0.707887	0.683089	0.0351382	0.0101435
6.00371	122.068	166.078	172.088	117.017	135.472	103.462	131.722	150.029	134.56	121.221	254.587	126.74		6.00371	107.068	151.078	157.088	102.017	120.472	88.462	116.722	135.029	119.56	106.221	239.587	111.74		6.00371	0.653957	0.712351	0.746729	0.668146	0.675131	0.63641	0.633708	0.650972	0.714277	0.663111	0.748802	0.697913	0.683459	0.0399984	0.0115465
6.02493	122.073	165.52	175.438	114.256	136.59	102.03	133.147	149.843	132.845	122.663	258.749	128.999		6.02493	107.073	150.52	160.438	99.256	121.59	87.03	118.147	134.843	117.845	107.663	243.749	113.999		6.02493	0.653988	0.70972	0.762654	0.650063	0.681396	0.626108	0.641445	0.650075	0.704031	0.672113	0.76181	0.712022	0.685452	0.0453043	0.0130782
6.04614	120.491	166.956	174.794	114.534	134.188	103.658	130.667	145.726	133.867	121.243	255.39	127.465		6.04614	105.491	151.956	159.794	99.534	119.188	88.658	115.667	130.726	118.867	106.243	240.39	112.465		6.04614	0.644325	0.71649	0.759592	0.651884	0.667935	0.63782	0.62798	0.630227	0.710137	0.663249	0.751312	0.702441	0.680283	0.0463334	0.0133753
6.06736	121.658	171.014	168.641	116.447	136.45	104.369	133.682	147.941	134.587	122.003	254.622	127.923		6.06736	106.658	156.014	153.641	101.447	121.45	89.369	118.682	132.941	119.587	107.003	239.622	112.923		6.06736	0.651453	0.735624	0.730344	0.664413	0.680611	0.642935	0.644349	0.640906	0.714438	0.667993	0.748911	0.705301	0.685607	0.039545	0.0114157
6.08858	120.331	165.965	169.172	116.216	135.217	105.378	132.274	145.521	134.486	119.067	255.699	126.374		6.08858	105.331	150.965	154.172	101.216	120.217	90.378	117.274	130.521	119.486	104.067	240.699	111.374		6.08858	0.643348	0.711818	0.732868	0.6629	0.673702	0.650194	0.636705	0.629239	0.713835	0.649664	0.752278	0.695627	0.679348	0.040844	0.0117906
6.10979	124.524	169.292	168.686	115.362	135.41	106.769	137.838	146.772	136.524	123.069	254.097	127.335		6.10979	109.524	154.292	153.686	100.362	120.41	91.769	122.838	131.772	121.524	108.069	239.097	112.335		6.10979	0.668958	0.727505	0.730557	0.657307	0.674783	0.660201	0.666913	0.63527	0.72601	0.674648	0.747271	0.701629	0.689254	0.0358684	0.0103543
6.13101	121.334	171.046	175.455	117.296	137.135	104.013	135.439	146.318	136.09	119.207	256.138	125.867		6.13101	106.334	156.046	160.455	102.296	122.135	89.013	120.439	131.318	121.09	104.207	241.138	110.867		6.13101	0.649474	0.735775	0.762734	0.669973	0.68445	0.640374	0.653888	0.633081	0.723418	0.650538	0.75365	0.69246	0.687485	0.0458474	0.013235
6.15222	117.391	172.593	174.123	117.922	133.71	104.923	139.041	148.829	131.236	119.858	257.948	126.892		6.15222	102.391	157.593	159.123	102.922	118.71	89.923	124.041	133.829	116.236	104.858	242.948	111.892		6.15222	0.625391	0.74307	0.756403	0.674073	0.665256	0.646921	0.673444	0.645187	0.694419	0.654602	0.759307	0.698862	0.686411	0.0451301	0.0130279
6.17344	123.281	168.596	170.415	118.142	135.079	107.322	138.653	146.492	134.27	122.749	254.948	130.103		6.17344	108.281	153.596	155.415	103.142	120.079	92.322	123.653	131.492	119.27	107.749	239.948	115.103		6.17344	0.661366	0.724223	0.738776	0.675514	0.672928	0.66418	0.671338	0.63392	0.712545	0.67265	0.74993	0.718917	0.691357	0.035988	0.0103888
6.19466	122.952	166.221	168.461	116.21	137.448	108.981	139.396	145.628	134.028	123.391	249.818	130.837		6.19466	107.952	151.221	153.461	101.21	122.448	93.981	124.396	130.628	119.028	108.391	234.818	115.837		6.19466	0.659357	0.713025	0.729488	0.662861	0.686204	0.676115	0.675372	0.629755	0.711099	0.676658	0.733897	0.723502	0.689778	0.0323161	0.00932884
6.21587	119.473	170.309	168.758	117.876	136.086	106.704	137.648	151.206	138.248	122.737	258.694	130.209		6.21587	104.473	155.309	153.758	102.876	121.086	91.704	122.648	136.206	123.248	107.737	243.694	115.209		6.21587	0.638107	0.7323	0.7309	0.673772	0.678572	0.659734	0.665882	0.656646	0.73631	0.672575	0.761638	0.71958	0.693835	0.0398154	0.0114937
6.23709	124.272	171.125	172.658	115.377	137.615	107.275	138.44	143.286	133.959	125.664	255.779	129.153		6.23709	109.272	156.125	157.658	100.377	122.615	92.275	123.44	128.286	118.959	110.664	240.779	114.153		6.23709	0.667419	0.736148	0.749439	0.657405	0.68714	0.663842	0.670181	0.618464	0.710687	0.690848	0.752528	0.712984	0.69309	0.0406644	0.0117388
6.2583	123.335	167.394	175.628	115.699	135.256	108.008	135.425	145.858	133.076	121.817	256.459	126.654		6.2583	108.335	152.394	160.628	100.699	120.256	93.008	120.425	130.858	118.076	106.817	241.459	111.654		6.2583	0.661696	0.718556	0.763557	0.659514	0.67392	0.669115	0.653812	0.630863	0.705411	0.666832	0.754653	0.697375	0.687942	0.0409165	0.0118116
6.27952	127.997	168.862	167.519	117.424	134.486	108.041	138.338	149.06	137.604	122.543	251.779	129.487		6.27952	112.997	153.862	152.519	102.424	119.486	93.041	123.338	134.06	122.604	107.543	236.779	114.487		6.27952	0.690171	0.725477	0.72501	0.670812	0.669605	0.669352	0.669628	0.6463	0.732463	0.671364	0.740026	0.71507	0.693773	0.0318094	0.00918257
6.30074	121.478	171.704	170.16	117.922	139.184	108.97	135.678	149.103	138.395	122.049	258.695	129.103		6.30074	106.478	156.704	155.16	102.922	124.184	93.97	120.678	134.103	123.395	107.049	243.695	114.103		6.30074	0.650354	0.738878	0.737564	0.674073	0.695933	0.676036	0.655186	0.646507	0.737188	0.66828	0.761641	0.712672	0.696193	0.0401083	0.0115783
6.32195	120.983	173.039	169.396	115.256	135.328	109.264	139.066	153.414	136.202	121.58	255.022	132.923		6.32195	105.983	158.039	154.396	100.256	120.328	94.264	124.066	138.414	121.202	106.58	240.022	117.923		6.32195	0.64733	0.745173	0.733933	0.656613	0.674324	0.678151	0.67358	0.667291	0.724087	0.665352	0.750162	0.736531	0.696044	0.0383721	0.0110771
6.34317	123.163	170.536	175.89	119.902	135.278	107.676	135.211	151.224	135.173	120.824	251.715	129.157		6.34317	108.163	155.536	160.89	104.902	120.278	92.676	120.211	136.224	120.173	105.824	236.715	114.157		6.34317	0.660645	0.733371	0.764802	0.687041	0.674044	0.666726	0.652651	0.656733	0.717939	0.660633	0.739826	0.713009	0.693952	0.0382723	0.0110483
6.36438	120.644	171.779	171.778	118.872	137.768	108.934	135.112	154.016	133.077	125.993	257.504	126.094		6.36438	105.644	156.779	156.778	103.872	122.768	93.934	120.112	139.016	118.077	110.993	242.504	111.094		6.36438	0.64526	0.739231	0.745256	0.680295	0.687998	0.675777	0.652113	0.670193	0.705417	0.692902	0.757919	0.693878	0.69552	0.035822	0.0103409
6.3856	123.25	169.457	173.626	120.534	136.574	108.705	136.765	151.103	132.116	124.466	253.391	130.421		6.3856	108.25	154.457	158.626	105.534	121.574	93.705	121.765	136.103	117.116	109.466	238.391	115.421		6.3856	0.661177	0.728283	0.75404	0.69118	0.681306	0.674129	0.661088	0.656149	0.699676	0.683369	0.745064	0.720904	0.696364	0.0335029	0.00967144
6.40682	122.694	166.151	175.342	120.148	138.928	110.009	136.373	146.626	132.552	126.372	263.887	131.427		6.40682	107.694	151.151	160.342	105.148	123.928	95.009	121.373	131.626	117.552	111.372	248.887	116.427		6.40682	0.657781	0.712695	0.762197	0.688652	0.694498	0.68351	0.658959	0.634566	0.702281	0.695268	0.777868	0.727187	0.699622	0.0416015	0.0120093
6.42803	124.195	166.595	170.702	118.418	137.173	109.189	137.682	150.388	137.595	119.292	265.945	133.629		6.42803	109.195	151.595	155.702	103.418	122.173	94.189	122.682	135.388	122.595	104.292	250.945	118.629		6.42803	0.666949	0.714788	0.740141	0.677322	0.684663	0.677611	0.666066	0.652702	0.732409	0.651069	0.7843	0.74094	0.69908	0.0424037	0.0122409
6.44925	126.285	169.867	175.676	118.728	138.488	113.054	133.416	152.661	137.108	121.782	260.87	132.056		6.44925	111.285	154.867	160.676	103.728	123.488	98.054	118.416	137.661	122.108	106.782	245.87	117.056		6.44925	0.679714	0.730216	0.763785	0.679352	0.692033	0.705417	0.642905	0.663661	0.729499	0.666613	0.768439	0.731116	0.704396	0.0403368	0.0116442
6.47046	125.03	172.019	172.441	122.142	136.382	109.916	135.267	148.03	134.048	122.094	258.413	133.371		6.47046	110.03	157.019	157.441	107.142	121.382	94.916	120.267	133.03	119.048	107.094	243.413	118.371		6.47046	0.672049	0.740363	0.748407	0.701712	0.68023	0.682841	0.652955	0.641335	0.711218	0.668561	0.76076	0.739329	0.69998	0.0398287	0.0114975
6.49168	125.167	171.609	172.378	122.975	136.767	109.728	136.643	151.221	133.122	126.821	265.319	130.836		6.49168	110.167	156.609	157.378	107.975	121.767	94.728	121.643	136.221	118.122	111.821	250.319	115.836		6.49168	0.672886	0.73843	0.748108	0.707167	0.682388	0.681489	0.660425	0.656718	0.705686	0.698071	0.782344	0.723496	0.704767	0.0378585	0.0109288
6.5129	124.314	171.468	172.297	120.822	139.445	105.883	135.982	148.852	138.643	121.816	264.417	133.368		6.5129	109.314	156.468	157.297	105.822	124.445	90.883	120.982	133.852	123.643	106.816	249.417	118.368		6.5129	0.667676	0.737765	0.747723	0.693066	0.697396	0.653827	0.656836	0.645297	0.73867	0.666826	0.779525	0.73931	0.701993	0.0449327	0.012971
6.53411	122.4	169.246	174.409	121.335	139.415	112.774	136.737	144.94	137.042	122.868	263.695	131.82		6.53411	107.4	154.246	159.409	106.335	124.415	97.774	121.737	129.94	122.042	107.868	248.695	116.82		6.53411	0.655985	0.727288	0.757762	0.696426	0.697227	0.703402	0.660936	0.626438	0.729105	0.673393	0.777268	0.729642	0.702906	0.0439944	0.0127001
6.55533	121.61	171.913	175.248	122.851	139.666	108.431	139.023	149.229	137.916	121.982	258.927	131.303		6.55533	106.61	156.913	160.248	107.851	124.666	93.431	124.023	134.229	122.916	106.982	243.927	116.303		6.55533	0.65116	0.739863	0.76175	0.706355	0.698634	0.672158	0.673347	0.647115	0.734327	0.667862	0.762366	0.726413	0.703446	0.041306	0.011924
6.57654	122.982	167.159	176.552	120.514	139.067	107.551	132.859	148.399	135.418	121.154	254.859	130.771		6.57654	107.982	152.159	161.552	105.514	124.067	92.551	117.859	133.399	120.418	106.154	239.859	115.771		6.57654	0.65954	0.717448	0.767949	0.691049	0.695277	0.665827	0.639881	0.643114	0.719403	0.662693	0.749652	0.72309	0.694577	0.041662	0.0120268
6.59776	121.927	167.88	176.781	118.43	137.441	111.427	137.75	151.225	140.383	124.17	252.451	127.815		6.59776	106.927	152.88	161.781	103.43	122.441	96.427	122.75	136.225	125.383	109.17	237.451	112.815		6.59776	0.653096	0.720847	0.769038	0.6774	0.686165	0.693712	0.666435	0.656738	0.749065	0.681521	0.742126	0.704627	0.700064	0.0377618	0.0109009
6.61898	119.373	167.043	175.465	121.196	138.658	109.936	139.296	151.903	139.426	123.907	256.901	130.987		6.61898	104.373	152.043	160.465	106.196	123.658	94.936	124.296	136.903	124.426	108.907	241.901	115.987		6.61898	0.637497	0.716901	0.762782	0.695516	0.692985	0.682985	0.674829	0.660006	0.743348	0.679879	0.756034	0.724439	0.702267	0.0389464	0.0112429
6.64019	120.649	169.158	176.904	116.557	135.69	110.444	136.082	150.453	136.037	122.497	262.116	133.885		6.64019	105.649	154.158	161.904	101.557	120.69	95.444	121.082	135.453	121.037	107.497	247.116	118.885		6.64019	0.64529	0.726873	0.769622	0.665133	0.676352	0.68664	0.657379	0.653016	0.723101	0.671077	0.772333	0.742539	0.699113	0.0456692	0.0131836
6.66141	122.125	166.081	181.636	117.082	135.722	110.201	133.547	151.658	137.708	122.997	252.333	132.933		6.66141	107.125	151.081	166.636	102.082	120.722	95.201	118.547	136.658	122.708	107.997	237.333	117.933		6.66141	0.654305	0.712365	0.792116	0.668572	0.676532	0.684892	0.643616	0.658825	0.733084	0.674198	0.741757	0.736593	0.698071	0.0448897	0.0129585
6.68262	122.15	171.208	176.489	120.612	132.609	112.182	135.346	150.696	138.747	124.718	254.762	125.345		6.68262	107.15	156.208	161.489	105.612	117.609	97.182	120.346	135.696	123.747	109.718	239.762	110.345		6.68262	0.654458	0.736539	0.76765	0.691691	0.659086	0.699143	0.653384	0.654187	0.739291	0.684942	0.749349	0.6892	0.698243	0.0407729	0.0117701
6.70384	123.378	171.556	179.106	118.231	135.347	111.558	134.414	150.23	137.592	122.347	255.205	128.97		6.70384	108.378	156.556	164.106	103.231	120.347	96.558	119.414	135.23	122.592	107.347	240.205	113.97		6.70384	0.661959	0.73818	0.78009	0.676097	0.67443	0.694654	0.648323	0.651941	0.732391	0.670141	0.750734	0.711841	0.699232	0.0428538	0.0123708
6.72506	122.864	168.549	174.752	121.084	132.921	107.455	134.551	150.792	137.024	125.824	253.342	129.51		6.72506	107.864	153.549	159.752	106.084	117.921	92.455	119.551	135.792	122.024	110.824	238.342	114.51		6.72506	0.658819	0.724002	0.759393	0.694782	0.660835	0.665137	0.649067	0.65465	0.728998	0.691847	0.744911	0.715214	0.695638	0.0383219	0.0110626
6.74627	119.809	166.959	176.619	119.258	135.324	111.075	134.951	154.101	138.055	125.439	256.201	130.404		6.74627	104.809	151.959	161.619	104.258	120.324	96.075	119.951	139.101	123.055	110.439	241.201	115.404		6.74627	0.64016	0.716505	0.768268	0.682823	0.674301	0.691179	0.651239	0.670603	0.735157	0.689443	0.753846	0.720797	0.699527	0.039847	0.0115028
6.76749	123.071	169.461	173.047	121.653	136.119	108.839	132.204	148.108	136.361	122.958	257.732	128.474		6.76749	108.071	154.461	158.047	106.653	121.119	93.839	117.204	133.108	121.361	107.958	242.732	113.474		6.76749	0.660083	0.728302	0.751288	0.698509	0.678757	0.675093	0.636325	0.641711	0.725037	0.673955	0.758631	0.708743	0.694703	0.0404894	0.0116883
6.7887	122.95	171.272	170.2	119.983	134.511	109.443	135.206	149.077	134.339	122.762	256.019	130.693		6.7887	107.95	156.272	155.2	104.983	119.511	94.443	120.206	134.077	119.339	107.762	241.019	115.693		6.7887	0.659344	0.736841	0.737754	0.687572	0.669745	0.679439	0.652623	0.646382	0.712957	0.672731	0.753278	0.722603	0.694272	0.0368223	0.0106297
6.80992	122.331	170.054	173.975	120.547	131.54	106.28	137.2	150.62	131.619	125.353	257.535	133.464		6.80992	107.331	155.054	158.975	105.547	116.54	91.28	122.2	135.62	116.619	110.353	242.535	118.464		6.80992	0.655564	0.731098	0.755699	0.691265	0.653096	0.656683	0.663449	0.653821	0.696707	0.688906	0.758016	0.73991	0.695351	0.0410082	0.011838
6.83114	125.323	172.267	172.214	116.975	137.883	108.19	134.221	149.128	133.972	126.538	263.627	129.13		6.83114	110.323	157.267	157.214	101.975	122.883	93.19	119.221	134.128	118.972	111.538	248.627	114.13		6.83114	0.673838	0.741532	0.747328	0.667871	0.688642	0.670424	0.647276	0.646628	0.710764	0.696304	0.777056	0.71284	0.698375	0.0410255	0.0118431
6.85235	127.091	172.343	173.624	118.911	135.741	108.805	139.439	148.669	132.645	124.007	253.956	127.528		6.85235	112.091	157.343	158.624	103.911	120.741	93.805	124.439	133.669	117.645	109.007	238.956	112.528		6.85235	0.684637	0.741891	0.754031	0.680551	0.676638	0.674849	0.675605	0.644415	0.702836	0.680504	0.74683	0.702834	0.697135	0.0339014	0.00978648
6.87357	123.733	173.936	169.93	118.963	134.363	107.961	135.731	152.765	136.517	124.765	252.741	129.333		6.87357	108.733	158.936	154.93	103.963	119.363	92.961	120.731	137.765	121.517	109.765	237.741	114.333		6.87357	0.664127	0.749402	0.736471	0.680891	0.668916	0.668777	0.655474	0.664162	0.725969	0.685236	0.743033	0.714108	0.69638	0.0349243	0.0100818
6.89478	124.062	168.973	171.409	117.671	131.502	109.281	134.054	149.422	131.692	123.106	253.46	132.197		6.89478	109.062	153.973	156.409	102.671	116.502	94.281	119.054	134.422	116.692	108.106	238.46	117.197		6.89478	0.666136	0.726001	0.743501	0.672429	0.652883	0.678273	0.646369	0.648045	0.697143	0.674879	0.74528	0.731996	0.690245	0.0373122	0.0107711
6.916	124.964	170.539	174.599	117.469	138.273	106.166	134.521	151.337	137.184	124.123	255.845	126.255		6.916	109.964	155.539	159.599	102.469	123.273	91.166	119.521	136.337	122.184	109.123	240.845	111.255		6.916	0.671646	0.733385	0.758665	0.671106	0.690828	0.655863	0.648904	0.657278	0.729953	0.681228	0.752734	0.694883	0.695539	0.0387075	0.0111739
6.93722	124.906	171.711	172.86	120.015	132.143	108.193	135.523	152.059	133.548	124.211	255.785	130.342		6.93722	109.906	156.711	157.86	105.015	117.143	93.193	120.523	137.059	118.548	109.211	240.785	115.342		6.93722	0.671291	0.738911	0.750399	0.687781	0.656475	0.670446	0.654344	0.660758	0.708231	0.681777	0.752546	0.72041	0.696114	0.0367004	0.0105945
6.95843	123.636	168.55	176.979	117.296	134.337	106.092	135.655	152.554	135.294	123.554	255.581	130.179		6.95843	108.636	153.55	161.979	102.296	119.337	91.092	120.655	137.554	120.294	108.554	240.581	115.179		6.95843	0.663534	0.724006	0.769979	0.669973	0.66877	0.655331	0.655061	0.663145	0.718662	0.677676	0.751909	0.719392	0.694787	0.0400502	0.0115615
6.97965	124.292	166.98	173.695	115.654	130.997	108.985	134.698	147.045	134.1	123.313	257.165	130.139		6.97965	109.292	151.98	158.695	100.654	115.997	93.985	119.698	132.045	119.1	108.313	242.165	115.139		6.97965	0.667541	0.716604	0.754368	0.659219	0.650053	0.676144	0.649865	0.636586	0.711529	0.676171	0.756859	0.719142	0.689507	0.0410385	0.0118468
7.00086	124.687	171.397	173.862	118.937	130.541	108.205	134.758	154.164	134.008	125.922	256.432	134.783		7.00086	109.687	156.397	158.862	103.937	115.541	93.205	119.758	139.164	119.008	110.922	241.432	119.783		7.00086	0.669954	0.73743	0.755162	0.680721	0.647497	0.670532	0.650191	0.670906	0.710979	0.692458	0.754568	0.748148	0.699046	0.0406012	0.0117206
7.02208	124.011	172.56	174.641	120.271	131.776	109.501	132.774	152.428	136.469	122.806	258.343	127.985		7.02208	109.011	157.56	159.641	105.271	116.776	94.501	117.774	137.428	121.469	107.806	243.343	112.985		7.02208	0.665825	0.742914	0.758865	0.689458	0.654418	0.679856	0.63942	0.662537	0.725682	0.673006	0.760541	0.705689	0.696517	0.0416511	0.0120237
7.0433	126.509	171.236	172.903	118.654	134.066	108.774	130.475	150.155	133.199	122.376	259.08	131.509		7.0433	111.509	156.236	157.903	103.654	119.066	93.774	115.475	135.155	118.199	107.376	244.08	116.509		7.0433	0.681082	0.736671	0.750603	0.678867	0.667251	0.674626	0.626938	0.651579	0.706146	0.670322	0.762844	0.727699	0.694552	0.0419827	0.0121194
7.06451	126.794	167.789	171.195	119.904	137.01	107.485	134.119	148.139	131.837	124.413	259.301	123.534		7.06451	111.794	152.789	156.195	104.904	122.01	92.485	119.119	133.139	116.837	109.413	244.301	108.534		7.06451	0.682823	0.720418	0.742484	0.687054	0.68375	0.665352	0.646722	0.64186	0.698009	0.683038	0.763535	0.677888	0.691078	0.035967	0.0103828
7.08573	124.171	168.856	171.946	118.125	134.658	107.481	133.237	148.255	127.989	122.548	263.113	126.163		7.08573	109.171	153.856	156.946	103.125	119.658	92.481	118.237	133.255	112.989	107.548	248.113	111.163		7.08573	0.666802	0.725449	0.746054	0.675403	0.670569	0.665324	0.641933	0.642419	0.67502	0.671395	0.775449	0.694309	0.687511	0.0410399	0.0118472
7.10694	124.604	175.417	173.6	119.559	139.817	108.969	133.069	149.4	130.041	123.963	256.754	125.378		7.10694	109.604	160.417	158.6	104.559	124.817	93.969	118.069	134.4	115.041	108.963	241.754	110.378		7.10694	0.669447	0.756385	0.753917	0.684795	0.69948	0.676028	0.641021	0.647939	0.68728	0.680229	0.755575	0.689406	0.695125	0.0398668	0.0115086
7.12816	119.613	170.277	170.912	119.332	136.255	109.043	135.145	149.299	134.449	124.414	257.239	125.954		7.12816	104.613	155.277	155.912	104.332	121.255	94.043	120.145	134.299	119.449	109.414	242.239	110.954		7.12816	0.638962	0.732149	0.741139	0.683308	0.679519	0.676561	0.652292	0.647452	0.713614	0.683044	0.757091	0.693003	0.691511	0.0377224	0.0108895
7.14938	122.413	173.144	173.725	114.101	131.683	109.569	136.027	152.02	133.039	125.263	259.285	128.655		7.14938	107.413	158.144	158.725	99.101	116.683	94.569	121.027	137.02	118.039	110.263	244.285	113.655		7.14938	0.656065	0.745668	0.754511	0.649048	0.653897	0.680345	0.657081	0.66057	0.70519	0.688344	0.763485	0.709873	0.693673	0.0418897	0.0120925
7.17059	123.787	168.917	176.008	118.82	136.454	110.725	135.145	149.761	132.04	122.388	257.732	127.1		7.17059	108.787	153.917	161.008	103.82	121.454	95.725	120.145	134.761	117.04	107.388	242.732	112.1		7.17059	0.664457	0.725737	0.765363	0.679955	0.680634	0.688661	0.652292	0.64968	0.699222	0.670397	0.758631	0.700161	0.694599	0.0379907	0.010967
7.19181	123.36	168.756	171.767	116.807	139.05	109.032	139.66	150.362	134.354	123.906	255.799	129.124		7.19181	108.36	153.756	156.767	101.807	124.05	94.032	124.66	135.362	119.354	108.906	240.799	114.124		7.19181	0.661849	0.724978	0.745203	0.666771	0.695182	0.676482	0.676805	0.652577	0.713046	0.679873	0.75259	0.712803	0.696513	0.032959	0.00951443
7.21302	126.167	171.351	172.034	113.701	138.056	107.737	135.471	152.444	136.512	125.823	254.687	131.053		7.21302	111.167	156.351	157.034	98.701	123.056	92.737	120.471	137.444	121.512	110.823	239.687	116.053		7.21302	0.678993	0.737213	0.746472	0.646428	0.689612	0.667165	0.654062	0.662614	0.725939	0.69184	0.749115	0.724851	0.697859	0.0372509	0.0107534
7.23424	127.184	166.998	172.595	115.273	131.065	107.486	135.447	152.05	135.191	128.432	257.501	128.518		7.23424	112.184	151.998	157.595	100.273	116.065	92.486	120.447	137.05	120.191	113.432	242.501	113.518		7.23424	0.685205	0.716688	0.749139	0.656724	0.650434	0.66536	0.653932	0.660715	0.718047	0.708128	0.757909	0.709018	0.694275	0.0375869	0.0108504
7.25546	124.142	165.274	176.107	116.651	138.514	109.803	137.396	157.396	137.072	125.478	255.392	127.713		7.25546	109.142	150.274	161.107	101.651	123.514	94.803	122.396	142.396	122.072	110.478	240.392	112.713		7.25546	0.666625	0.70856	0.765834	0.665749	0.692178	0.682028	0.664513	0.686488	0.729284	0.689687	0.751318	0.70399	0.700521	0.0332081	0.00958634
7.27667	124.829	165.622	178.293	116.229	133.768	110.131	135.283	154.788	133.382	127.11	261.753	130.572		7.27667	109.829	150.622	163.293	101.229	118.768	95.131	120.283	139.788	118.382	112.11	246.753	115.572		7.27667	0.670821	0.7102	0.776225	0.662985	0.665581	0.684388	0.653041	0.673915	0.707239	0.699875	0.771199	0.721847	0.699776	0.040506	0.0116931
7.29789	128.68	170.421	178.096	116.449	137.5	106.221	134.959	155.406	132.838	124.391	256.914	127.369		7.29789	113.68	155.421	163.096	101.449	122.5	91.221	119.959	140.406	117.838	109.391	241.914	112.369		7.29789	0.694343	0.732828	0.775289	0.664426	0.686496	0.656259	0.651282	0.676894	0.703989	0.682901	0.756075	0.701841	0.698552	0.0387033	0.0111727
7.3191	124.791	167.605	171.601	116.821	133.468	111.542	136.853	151.467	135.666	127.96	261.093	128.65		7.3191	109.791	152.605	156.601	101.821	118.468	96.542	121.853	136.467	120.666	112.96	246.093	113.65		7.3191	0.670589	0.719551	0.744414	0.666862	0.6639	0.694539	0.661565	0.657904	0.720885	0.705181	0.769136	0.709842	0.698697	0.0359539	0.010379
7.34032	126.047	167.5	176.671	112.608	138.244	110.099	139.374	153.492	135.906	125.13	261.552	129.164		7.34032	111.047	152.5	161.671	97.608	123.244	95.099	124.374	138.492	120.906	110.13	246.552	114.164		7.34032	0.678261	0.719055	0.768515	0.63927	0.690665	0.684158	0.675252	0.667667	0.722318	0.687514	0.77057	0.713053	0.701358	0.0393083	0.0113473
7.36154	122.488	164.011	178.057	118.487	137.364	109.682	136.793	149.922	134.233	126.639	264.514	129.242		7.36154	107.488	149.011	163.057	103.487	122.364	94.682	121.793	134.922	119.233	111.639	249.514	114.242		7.36154	0.656523	0.702604	0.775103	0.677774	0.685734	0.681158	0.66124	0.650456	0.712323	0.696934	0.779828	0.71354	0.699435	0.0418442	0.0120794
7.38275	125.046	169.324	178.858	121.095	135.658	106.519	136.515	146.664	137.143	123.432	262.464	126.844		7.38275	110.046	154.324	163.858	106.095	120.658	91.519	121.515	131.664	122.143	108.432	247.464	111.844		7.38275	0.672147	0.727656	0.778911	0.694854	0.676173	0.658403	0.65973	0.634749	0.729708	0.676914	0.773421	0.698562	0.698436	0.0454776	0.0131282
7.40397	124.774	168.33	174.504	118.486	136.454	105.937	139.304	147.146	135.261	123.807	263.884	129.477		7.40397	109.774	153.33	159.504	103.486	121.454	90.937	124.304	132.146	120.261	108.807	248.884	114.477		7.40397	0.670485	0.722969	0.758214	0.677767	0.680634	0.654216	0.674872	0.637073	0.718465	0.679255	0.777859	0.715008	0.697235	0.0418993	0.0120953
7.42518	119.802	168.23	175.102	117.284	136.403	110.245	138.405	146.894	136.012	122.44	259.372	128.263		7.42518	104.802	153.23	160.102	102.284	121.403	95.245	123.405	131.894	121.012	107.44	244.372	113.263		7.42518	0.640117	0.722498	0.761056	0.669895	0.680348	0.685208	0.669991	0.635858	0.722952	0.670721	0.763757	0.707425	0.694152	0.0420387	0.0121355
7.4464	120.596	170.636	180.103	120.307	135.906	111.195	134.066	148.361	134.162	120.827	262.288	132.328		7.4464	105.596	155.636	165.103	105.307	120.906	96.195	119.066	133.361	119.162	105.827	247.288	117.328		7.4464	0.644967	0.733842	0.784829	0.689694	0.677563	0.692043	0.646434	0.64293	0.711899	0.660652	0.772871	0.732815	0.699211	0.0488397	0.0140988
7.46762	121.31	166.372	177.299	119.556	133.866	110.209	134.283	150.462	135.536	122.041	264.873	125.111		7.46762	106.31	151.372	162.299	104.556	118.866	95.209	119.283	135.462	120.536	107.041	249.873	110.111		7.46762	0.649328	0.713737	0.7715	0.684775	0.666131	0.684949	0.647612	0.653059	0.720108	0.66823	0.78095	0.687738	0.69401	0.0448313	0.0129417
7.48883	123.297	168.592	175.697	116.832	135.476	109.386	135.167	151.559	133.268	124.003	262.32	128.392		7.48883	108.297	153.592	160.697	101.832	120.476	94.386	120.167	136.559	118.268	109.003	247.32	113.392		7.48883	0.661464	0.724204	0.763885	0.666935	0.675153	0.679028	0.652412	0.658348	0.706558	0.680479	0.772971	0.708231	0.695806	0.0403481	0.0116475
7.51005	125.258	167.69	180.246	121.237	137.296	108.371	134.509	147.117	135.067	120.582	266.403	132.082		7.51005	110.258	152.69	165.246	106.237	122.296	93.371	119.509	132.117	120.067	105.582	251.403	117.082		7.51005	0.673441	0.719951	0.785509	0.695784	0.685352	0.671726	0.648839	0.636933	0.717306	0.659122	0.785732	0.731278	0.700915	0.0489252	0.0141235
7.53126	120.577	169.303	172.635	121.102	135.443	109.803	138.914	150.778	134.903	122.982	261.952	128.863		7.53126	105.577	154.303	157.635	106.102	120.443	94.803	123.914	135.778	119.903	107.982	246.952	113.863		7.53126	0.64485	0.727557	0.749329	0.6949	0.674968	0.682028	0.672755	0.654583	0.716326	0.674105	0.771821	0.711173	0.697866	0.0383528	0.0110715
7.55248	122.989	166.559	178.576	120.565	134.731	105.462	137.523	149.462	135.461	123.101	264.57	126.344		7.55248	107.989	151.559	163.576	105.565	119.731	90.462	122.523	134.462	120.461	108.101	249.57	111.344		7.55248	0.659583	0.714619	0.77757	0.691383	0.670978	0.650799	0.665203	0.648238	0.71966	0.674848	0.780003	0.695439	0.695694	0.045035	0.0130005
7.5737	123.732	170.658	178.761	117.092	137.568	107.985	133.023	149.837	134.614	124.165	256.953	128.48		7.5737	108.732	155.658	163.761	102.092	122.568	92.985	118.023	134.837	119.614	109.165	241.953	113.48		7.5737	0.664121	0.733946	0.77845	0.668637	0.686877	0.668949	0.640771	0.650046	0.7146	0.68149	0.756197	0.70878	0.696072	0.0429833	0.0124082
7.59491	121.888	171.08	181.629	116.456	135.251	104.269	132.411	150.453	137.88	123.557	256.862	131.294		7.59491	106.888	156.08	166.629	101.456	120.251	89.269	117.411	135.453	122.88	108.557	241.862	116.294		7.59491	0.652858	0.735936	0.792083	0.664472	0.673892	0.642216	0.637449	0.653016	0.734111	0.677694	0.755912	0.726356	0.6955	0.0510214	0.0147286
7.61613	121.372	173.051	177.941	115.726	131.28	103.939	134.344	151.839	134.329	124.939	255.675	132.905		7.61613	106.372	158.051	162.941	100.726	116.28	88.939	119.344	136.839	119.329	109.939	240.675	117.905		7.61613	0.649706	0.745229	0.774552	0.659691	0.651639	0.639842	0.647943	0.659698	0.712897	0.686322	0.752203	0.736418	0.693012	0.0484943	0.0139991
7.63734	122.045	168.761	180.54	120.134	137.969	103.547	136.595	151.755	135.921	121.614	263.115	128.9		7.63734	107.045	153.761	165.54	105.134	122.969	88.547	121.595	136.755	120.921	106.614	248.115	113.9		7.63734	0.653817	0.725001	0.786906	0.68856	0.689124	0.637022	0.660165	0.659293	0.722408	0.665565	0.775455	0.711404	0.697893	0.0478902	0.0138247
7.65856	121.409	169.149	174.864	117.171	131.188	107.981	135.85	151.032	136.118	123.654	259.446	128.316		7.65856	106.409	154.149	159.864	102.171	116.188	92.981	120.85	136.032	121.118	108.654	244.446	113.316		7.65856	0.649932	0.726831	0.759925	0.669155	0.651123	0.668921	0.65612	0.655807	0.723585	0.6783	0.763988	0.707756	0.69262	0.042137	0.0121639
7.67978	123.748	167.35	176.084	120.267	132.655	105.328	136.024	150.063	137.893	127.126	258.492	129.535		7.67978	108.748	152.35	161.084	105.267	117.655	90.328	121.024	135.063	122.893	112.126	243.492	114.535		7.67978	0.664219	0.718348	0.765724	0.689432	0.659344	0.649835	0.657065	0.651136	0.734189	0.699975	0.761007	0.71537	0.697137	0.0420796	0.0121473
7.70099	125.584	171.544	173.849	114.922	132.29	106.014	132.878	149.699	134.533	122.943	255.752	129.735		7.70099	110.584	156.544	158.849	99.922	117.29	91.014	117.878	134.699	119.533	107.943	240.752	114.735		7.70099	0.675433	0.738123	0.7551	0.654425	0.657299	0.65477	0.639984	0.649381	0.714116	0.673861	0.752443	0.716619	0.690129	0.0425796	0.0122917
7.72221	121.746	168.047	180.039	117.046	133.453	107.271	135.112	149.016	135.531	123.458	265.898	130.021		7.72221	106.746	153.047	165.039	102.046	118.453	92.271	120.112	134.016	120.531	108.458	250.898	115.021		7.72221	0.651991	0.721635	0.784525	0.668336	0.663816	0.663813	0.652113	0.646088	0.720078	0.677076	0.784153	0.718405	0.696002	0.0494477	0.0142743
7.74342	124.172	169.764	180.899	116.316	129.868	106.799	135.769	152.309	133.228	119.131	266.604	131.081		7.74342	109.172	154.764	165.899	101.316	114.868	91.799	120.769	137.309	118.228	104.131	251.604	116.081		7.74342	0.666808	0.729731	0.788613	0.663555	0.643726	0.660417	0.65568	0.661964	0.706319	0.650064	0.78636	0.725026	0.694855	0.0518836	0.0149775
7.76464	121.005	165.45	178.241	119.745	134.914	105.558	133.771	151.448	137.034	123.02	263.912	129.266		7.76464	106.005	150.45	163.241	104.745	119.914	90.558	118.771	136.448	122.034	108.02	248.912	114.266		7.76464	0.647465	0.709389	0.775978	0.686013	0.672004	0.651489	0.644833	0.657813	0.729057	0.674342	0.777946	0.71369	0.695002	0.0469454	0.013552
7.78586	124.663	170.87	177.639	116.636	134.437	106.583	133.437	151.119	135.493	122.583	267.011	131.761		7.78586	109.663	155.87	162.639	101.636	119.437	91.583	118.437	136.119	120.493	107.583	252.011	116.761		7.78586	0.669807	0.734945	0.773116	0.665651	0.669331	0.658863	0.643019	0.656227	0.719851	0.671614	0.787632	0.729273	0.698277	0.0487619	0.0140763
7.80707	120.608	173.268	176.536	117.237	133.766	107.387	134.345	148.501	138.434	123.778	268.333	129.914		7.80707	105.608	158.268	161.536	102.237	118.766	92.387	119.345	133.501	123.434	108.778	253.333	114.914		7.80707	0.64504	0.746252	0.767873	0.669587	0.66557	0.664647	0.647949	0.643605	0.737421	0.679074	0.791764	0.717737	0.698043	0.0518249	0.0149605
7.82829	123.571	172.912	175.488	122.498	136.654	110.475	135.94	148.902	135.16	125.379	258.265	131.893		7.82829	108.571	157.912	160.488	107.498	121.654	95.475	120.94	133.902	120.16	110.379	243.265	116.893		7.82829	0.663137	0.744574	0.762891	0.704043	0.681755	0.686863	0.656608	0.645538	0.717862	0.689069	0.760297	0.730098	0.703561	0.0398858	0.011514
7.8495	123.274	172.777	176.251	121.213	137.67	105.685	131.22	151.383	133.259	122.97	264.749	127.048		7.8495	108.274	157.777	161.251	106.213	122.67	90.685	116.22	136.383	118.259	107.97	249.749	112.048		7.8495	0.661323	0.743937	0.766518	0.695627	0.687448	0.652403	0.630983	0.657499	0.706505	0.67403	0.780562	0.699836	0.696389	0.0466257	0.0134597
7.87072	124.816	173.814	175.564	120.447	135.486	108.647	135.069	150.252	135.3	124.372	262.563	126.469		7.87072	109.816	158.814	160.564	105.447	120.486	93.647	120.069	135.252	120.3	109.372	247.563	111.469		7.87072	0.670742	0.748827	0.763253	0.69061	0.675209	0.673712	0.65188	0.652047	0.718698	0.682782	0.77373	0.69622	0.699809	0.0419371	0.0121062
7.89194	121.897	170.976	177.38	120.398	134.762	105.409	137.527	147.001	134.772	121.673	261.119	132.194		7.89194	106.897	155.976	162.38	105.398	119.762	90.409	122.527	132.001	119.772	106.673	246.119	117.194		7.89194	0.652913	0.735445	0.771885	0.69029	0.671152	0.650417	0.665225	0.636374	0.715544	0.665933	0.769217	0.731978	0.696364	0.0470403	0.0135794
7.91315	120.212	169.134	170.777	118.91	138.031	106.658	133.997	149.215	134.096	123.143	255.805	131.829		7.91315	105.212	154.134	155.777	103.91	123.031	91.658	118.997	134.215	119.096	108.143	240.805	116.829		7.91315	0.642621	0.72676	0.740497	0.680544	0.689471	0.659403	0.64606	0.647047	0.711505	0.67511	0.752609	0.729698	0.691777	0.0394158	0.0113784
7.93437	124.56	170.644	175.739	117.179	135.746	108.723	134.234	152.573	132.26	119.234	257.96	130.966		7.93437	109.56	155.644	160.739	102.179	120.746	93.723	119.234	137.573	117.26	104.234	242.96	115.966		7.93437	0.669178	0.73388	0.764084	0.669207	0.676666	0.674259	0.647346	0.663236	0.700536	0.650707	0.759344	0.724308	0.694396	0.0411756	0.0118864
7.95558	120.863	168.202	174.66	118.688	133.543	109.37	134.11	147.84	135.125	121.204	264.036	130.679		7.95558	105.863	153.202	159.66	103.688	118.543	94.37	119.11	132.84	120.125	106.204	249.036	115.679		7.95558	0.646597	0.722366	0.758955	0.67909	0.66432	0.678913	0.646673	0.640419	0.717652	0.663005	0.778334	0.722515	0.693237	0.0458762	0.0132433
7.9768	121.652	169.826	171.997	121.487	134.855	106.445	134.979	146.992	133.41	121.527	260.048	128.427		7.9768	106.652	154.826	156.997	106.487	119.855	91.445	119.979	131.992	118.41	106.527	245.048	113.427		7.9768	0.651416	0.730023	0.746297	0.697422	0.671673	0.65787	0.651391	0.63633	0.707407	0.665021	0.76587	0.708449	0.690764	0.0416377	0.0120198
7.99802	123.826	167.582	174.931	121.27	136.45	105.933	135.755	147.69	132.387	121.086	262.133	130.192		7.99802	108.826	152.582	159.931	106.27	121.45	90.933	120.755	132.69	117.387	106.086	247.133	115.192		7.99802	0.664695	0.719442	0.760244	0.696001	0.680611	0.654187	0.655604	0.639695	0.701295	0.662268	0.772386	0.719473	0.693825	0.042575	0.0122903
8.01923	120.143	168.079	173.806	120.509	134.921	105.254	132.788	151.786	131.727	118.479	263.419	127.386		8.01923	105.143	153.079	158.806	105.509	119.921	90.254	117.788	136.786	116.727	103.479	248.419	112.386		8.01923	0.6422	0.721786	0.754896	0.691017	0.672043	0.649302	0.639496	0.659442	0.697352	0.645994	0.776406	0.701947	0.687657	0.045231	0.0130571
8.04045	118.935	168.718	178.548	122.234	132.365	103.877	134.876	148.938	136.008	121.428	261.326	130.731		8.04045	103.935	153.718	163.548	107.234	117.365	88.877	119.876	133.938	121.008	106.428	246.326	115.731		8.04045	0.634821	0.724799	0.777437	0.702314	0.657719	0.639396	0.650832	0.645712	0.722928	0.664403	0.769864	0.72284	0.692755	0.0506826	0.0146308
8.06166	120.887	166.262	180.477	124.415	135.201	106.527	135.569	152.109	135.423	120.167	258.096	130.525		8.06166	105.887	151.262	165.477	109.415	120.201	91.527	120.569	137.109	120.423	105.167	243.096	115.525		8.06166	0.646744	0.713218	0.786607	0.716598	0.673612	0.65846	0.654594	0.660999	0.719433	0.656531	0.759769	0.721553	0.697343	0.0457375	0.0132033
8.08288	122.712	166.604	184.046	119.07	135.026	106.238	137.204	145.059	132.685	120.439	266.588	130.858		8.08288	107.712	151.604	169.046	104.07	120.026	91.238	122.204	130.059	117.685	105.439	251.588	115.858		8.08288	0.657891	0.714831	0.803572	0.681592	0.672631	0.656381	0.663471	0.627011	0.703075	0.658229	0.78631	0.723633	0.695719	0.0538641	0.0155492
8.1041	122.6	166.02	180.19	122.99	133.378	106.625	135.217	147.45	134.021	124.5	260.229	132.71		8.1041	107.6	151.02	165.19	107.99	118.378	91.625	120.217	132.45	119.021	109.5	245.229	117.71		8.1041	0.657207	0.712077	0.785243	0.707265	0.663396	0.659165	0.652683	0.638538	0.711057	0.683581	0.766436	0.7352	0.697654	0.0469995	0.0135676
8.12531	126.364	169.205	180.283	120.149	136.559	107.749	138.663	145.401	134.086	122.425	259.937	130.108		8.12531	111.364	154.205	165.283	105.149	121.559	92.749	123.663	130.401	119.086	107.425	244.937	115.108		8.12531	0.680197	0.727095	0.785685	0.688659	0.681222	0.667252	0.671392	0.62866	0.711445	0.670627	0.765523	0.718949	0.699725	0.044287	0.0127846
8.14653	120.363	170.466	177.221	118.199	133.723	108.945	136.726	149.084	134.302	123.628	258.843	133.915		8.14653	105.363	155.466	162.221	103.199	118.723	93.945	121.726	134.084	119.302	108.628	243.843	118.915		8.14653	0.643543	0.733041	0.771129	0.675887	0.665329	0.675856	0.660876	0.646416	0.712736	0.678138	0.762104	0.742727	0.697315	0.0450685	0.0130102
8.16774	121.973	171.851	177.824	119.26	135.815	106.912	137.469	146.426	134.99	123.276	259.287	132.811		8.16774	106.973	156.851	162.824	104.26	120.815	91.912	122.469	131.426	119.99	108.276	244.287	117.811		8.16774	0.653377	0.739571	0.773996	0.682836	0.677053	0.66123	0.66491	0.633602	0.716846	0.67594	0.763491	0.735831	0.698224	0.0460425	0.0132913
8.18896	118.561	167.034	179.052	122.064	137.227	108.485	140.56	149.269	136.444	122.281	265.334	128.843		8.18896	103.561	152.034	164.052	107.064	122.227	93.485	125.56	134.269	121.444	107.281	250.334	113.843		8.18896	0.632537	0.716858	0.779833	0.701201	0.684966	0.672546	0.681691	0.647308	0.725532	0.669729	0.782391	0.711048	0.70047	0.0464929	0.0134213
8.21018	120.572	172.029	175.682	124.414	136.202	111.041	135.736	146.861	135.897	126.763	254.492	130.148		8.21018	105.572	157.029	160.682	109.414	121.202	96.041	120.736	131.861	120.897	111.763	239.492	115.148		8.21018	0.64482	0.74041	0.763813	0.716592	0.679222	0.690935	0.655501	0.635699	0.722265	0.697709	0.748505	0.719199	0.701222	0.0414053	0.0119527
8.23139	119.39	168.68	183.613	119.815	138.836	107.31	136.194	151.98	134.208	125.765	258.821	130.695		8.23139	104.39	153.68	168.613	104.815	123.836	92.31	121.194	136.98	119.208	110.765	243.821	115.695		8.23139	0.6376	0.724619	0.801514	0.686471	0.693983	0.664093	0.657987	0.660377	0.712174	0.691478	0.762035	0.722615	0.701246	0.0469143	0.013543
8.25261	121.665	168.932	173.759	119.267	137.433	108.433	134.781	146.141	136.221	126.299	260.574	133.829		8.25261	106.665	153.932	158.759	104.267	122.433	93.433	119.781	131.141	121.221	111.299	245.574	118.829		8.25261	0.651496	0.725808	0.754672	0.682882	0.68612	0.672172	0.650316	0.632228	0.7242	0.694812	0.767514	0.74219	0.698701	0.0439625	0.0126909
8.27382	122.302	169.682	178.01	122.018	135.94	108.517	138.689	146.904	135.701	125.528	254.048	132.679		8.27382	107.302	154.682	163.01	107.018	120.94	93.517	123.689	131.904	120.701	110.528	239.048	117.679		8.27382	0.655387	0.729344	0.77488	0.700899	0.677753	0.672777	0.671533	0.635906	0.721094	0.689999	0.747118	0.735007	0.700975	0.0411126	0.0118682
8.29504	122.246	166.577	175.336	121.486	132.492	108.922	135.798	143.385	135.507	126.133	260.334	132.087		8.29504	107.246	151.577	160.336	106.486	117.492	93.922	120.798	128.385	120.507	111.133	245.334	117.087		8.29504	0.655044	0.714703	0.762169	0.697415	0.658431	0.67569	0.655838	0.618941	0.719935	0.693776	0.766764	0.731309	0.695835	0.0453414	0.0130889
8.31626	125.628	170.005	178.453	118.534	137.033	105.443	136.247	143.884	136.133	124.395	265.406	128.864		8.31626	110.628	155.005	163.453	103.534	122.033	90.443	121.247	128.884	121.133	109.395	250.406	113.864		8.31626	0.675701	0.730867	0.776986	0.678082	0.683879	0.650662	0.658275	0.621347	0.723674	0.682926	0.782616	0.711179	0.698016	0.0489219	0.0141225
8.33747	122.212	171.048	181.289	121.099	134.083	103.636	135.704	144.161	134.792	122.538	257.718	130.756		8.33747	107.212	156.048	166.289	106.099	119.083	88.636	120.704	129.161	119.792	107.538	242.718	115.756		8.33747	0.654837	0.735785	0.790467	0.694881	0.667347	0.637662	0.655327	0.622682	0.715663	0.671333	0.758588	0.722996	0.693964	0.0513879	0.0148344
8.35869	124.948	168.621	181.234	121.693	134.6	107.432	138.244	149.645	132.627	125.783	263.041	130.043		8.35869	109.948	153.621	166.234	106.693	119.6	92.432	123.244	134.645	117.627	110.783	248.041	115.043		8.35869	0.671548	0.724341	0.790205	0.698771	0.670244	0.664971	0.669117	0.64912	0.702729	0.691591	0.775224	0.718543	0.7022	0.0439193	0.0126784
8.3799	118.717	173.896	182.615	120.194	138.117	104.945	136.228	151.064	133.702	125.001	258.584	128.905		8.3799	103.717	158.896	167.615	105.194	123.117	89.945	121.228	136.064	118.702	110.001	243.584	113.905		8.3799	0.63349	0.749213	0.79677	0.688953	0.689953	0.647079	0.658172	0.655961	0.709151	0.686709	0.761294	0.711435	0.699015	0.0495975	0.0143176
8.40112	122.468	176.789	177.711	118.901	136.539	107.032	137.238	147.423	136.72	121.621	261.893	132.474		8.40112	107.468	161.789	162.711	103.901	121.539	92.032	122.238	132.423	121.72	106.621	246.893	117.474		8.40112	0.6564	0.762854	0.773458	0.680485	0.68111	0.662093	0.663656	0.638408	0.727181	0.665608	0.771636	0.733726	0.701385	0.0492716	0.0142235
8.42234	121.392	170.191	174.585	118.822	137.171	103.655	137.735	149.769	137.037	124.062	266.764	129.956		8.42234	106.392	155.191	159.585	103.822	122.171	88.655	122.735	134.769	122.037	109.062	251.764	114.956		8.42234	0.649828	0.731744	0.758599	0.679968	0.684652	0.637799	0.666354	0.649718	0.729075	0.680847	0.78686	0.717999	0.697787	0.0468527	0.0135252
8.44355	122.468	172.342	173.613	119.443	137.79	108.124	137.416	148.113	131.7	125.041	259.328	132.883		8.44355	107.468	157.342	158.613	104.443	122.79	93.124	122.416	133.113	116.7	110.041	244.328	117.883		8.44355	0.6564	0.741886	0.753978	0.684035	0.688121	0.669949	0.664622	0.641735	0.697191	0.686959	0.76362	0.736281	0.698731	0.0404935	0.0116895
8.46477	122.446	170.411	178.013	122.38	136.613	106.453	140.025	146.522	133.142	120.305	269.079	130.358		8.46477	107.446	155.411	163.013	107.38	121.613	91.453	125.025	131.522	118.142	105.305	254.079	115.358		8.46477	0.656266	0.732781	0.774894	0.70327	0.681525	0.657928	0.678787	0.634065	0.705806	0.657393	0.794095	0.72051	0.699777	0.049211	0.014206
8.48598	120.628	169.264	178.874	121.374	132.795	106.645	136.634	146.704	137.761	122.949	266.703	130.795		8.48598	105.628	154.264	163.874	106.374	117.795	91.645	121.634	131.704	122.761	107.949	251.703	115.795		8.48598	0.645162	0.727373	0.778987	0.696682	0.660129	0.659309	0.660376	0.634942	0.733401	0.673899	0.786669	0.72324	0.698347	0.0512305	0.014789
8.5072	122.619	169.895	173.552	118.526	132.412	108.327	135.713	150.835	139.957	124.73	263.77	131.08		8.5072	107.619	154.895	158.552	103.526	117.412	93.327	120.713	135.835	124.957	109.73	248.77	116.08		8.5072	0.657323	0.730348	0.753688	0.678029	0.657982	0.67141	0.655376	0.654857	0.74652	0.685017	0.777503	0.72502	0.699423	0.044453	0.0128325
8.52842	119.221	168.263	178.906	119.331	137.103	107.113	138.231	148.937	137.148	124.683	268.989	124.457		8.52842	104.221	153.263	163.906	104.331	122.103	92.113	123.231	133.937	122.148	109.683	253.989	109.457		8.52842	0.636568	0.722653	0.779139	0.683301	0.684271	0.662676	0.669047	0.645707	0.729738	0.684724	0.793814	0.683653	0.697941	0.0493227	0.0142382
8.54963	123.957	164.093	173.853	117.289	136.113	108.039	136.915	150.292	136.789	125.514	264.622	128.675		8.54963	108.957	149.093	158.853	102.289	121.113	93.039	121.915	135.292	121.789	110.514	249.622	113.675		8.54963	0.665495	0.702991	0.755119	0.669928	0.678723	0.669338	0.661902	0.65224	0.727594	0.689911	0.780165	0.709998	0.69695	0.039938	0.0115291
8.57085	122.785	165.426	174.097	118.924	135.355	107.783	139.068	146.578	135.392	121.348	257.794	131.785		8.57085	107.785	150.426	159.097	103.924	120.355	92.783	124.068	131.578	120.392	106.348	242.794	116.785		8.57085	0.658337	0.709276	0.756279	0.680636	0.674475	0.667496	0.673591	0.634335	0.719248	0.663904	0.758825	0.729423	0.693819	0.0400257	0.0115544
8.59206	123.13	169.246	174.131	119.399	133.502	107.201	141.029	146.77	136.257	124.129	266.204	131.74		8.59206	108.13	154.246	159.131	104.399	118.502	92.201	126.029	131.77	121.257	109.129	251.204	116.74		8.59206	0.660444	0.727288	0.756441	0.683747	0.664091	0.663309	0.684238	0.63526	0.724415	0.681265	0.78511	0.729142	0.699562	0.0445912	0.0128724
8.61328	122.529	168.049	177.138	119.949	134.416	109.855	134.066	147.191	131.978	125.449	265.166	132.003		8.61328	107.529	153.049	162.138	104.949	119.416	94.855	119.066	132.191	116.978	110.449	250.166	117.003		8.61328	0.656773	0.721644	0.770735	0.687349	0.669213	0.682402	0.646434	0.63729	0.698852	0.689506	0.781866	0.730785	0.697737	0.0459837	0.0132744
8.6345	125.416	168.718	179.946	116.037	136.672	107.712	139.289	150.833	135.211	124.759	271.502	127.685		8.6345	110.416	153.718	164.946	101.037	121.672	92.712	124.289	135.833	120.211	109.759	256.502	112.685		8.6345	0.674406	0.724799	0.784083	0.661728	0.681856	0.666985	0.674791	0.654848	0.718166	0.685198	0.801668	0.703815	0.702695	0.0473967	0.0136823
8.65571	125.945	170.249	173.988	116.667	134.695	102.978	140.137	150.774	132.903	126.642	263.916	128.961		8.65571	110.945	155.249	158.988	101.667	119.695	87.978	125.137	135.774	117.903	111.642	248.916	113.961		8.65571	0.677638	0.732017	0.755761	0.665854	0.670776	0.632928	0.679395	0.654563	0.704378	0.696953	0.777959	0.711785	0.696667	0.0423768	0.0122331
8.67693	123.716	174.85	175.77	115.765	132.7	108.492	139.794	148.4	133.04	124.254	267.318	127.339		8.67693	108.716	159.85	160.77	100.765	117.7	93.492	124.794	133.4	118.04	109.254	252.318	112.339		8.67693	0.664023	0.753712	0.764232	0.659946	0.659596	0.672597	0.677533	0.643118	0.705196	0.682045	0.788591	0.701654	0.697687	0.0468744	0.0135315
8.69814	119.437	172.744	171.631	118.796	136.486	109.637	136.182	150.048	134.03	123.212	258.907	133.399		8.69814	104.437	157.744	156.631	103.796	121.486	94.637	121.182	135.048	119.03	108.212	243.907	118.399		8.69814	0.637887	0.743782	0.744557	0.679797	0.680813	0.680834	0.657922	0.651063	0.711111	0.675541	0.762304	0.739504	0.697093	0.0417042	0.012039
8.71936	122.618	170.02	179.686	116.151	134.694	105.355	134.566	150.794	129.9	126.759	262.399	128.663		8.71936	107.618	155.02	164.686	101.151	119.694	90.355	119.566	135.794	114.9	111.759	247.399	113.663		8.71936	0.657317	0.730938	0.782847	0.662474	0.670771	0.650029	0.649149	0.65466	0.686437	0.697684	0.773218	0.709923	0.693787	0.0469325	0.0135482
8.74058	124.674	168.719	173.392	114.62	133.418	108.897	135.283	150.335	133.057	127.164	261.531	132.635		8.74058	109.674	153.719	158.392	99.62	118.418	93.897	120.283	135.335	118.057	112.164	246.531	117.635		8.74058	0.669874	0.724803	0.752928	0.652447	0.66362	0.67551	0.653041	0.652447	0.705298	0.700212	0.770505	0.734732	0.696285	0.0415766	0.0120021
8.76179	122.045	165.075	175.743	115.583	135.454	108.572	135.816	149.151	132.939	126.429	267.884	131.992		8.76179	107.045	150.075	160.743	100.583	120.454	93.572	120.816	134.151	117.939	111.429	252.884	116.992		8.76179	0.653817	0.707621	0.764103	0.658754	0.67503	0.673172	0.655935	0.646739	0.704593	0.695623	0.79036	0.730716	0.696372	0.0458395	0.0132327
8.78301	125.659	168.736	176.39	116.303	139.515	105.739	136.731	147.277	133.656	127.649	266.119	132.435		8.78301	110.659	153.736	161.39	101.303	124.515	90.739	121.731	132.277	118.656	112.649	251.119	117.435		8.78301	0.675891	0.724883	0.767179	0.66347	0.697788	0.652791	0.660903	0.637704	0.708876	0.70324	0.784844	0.733483	0.700921	0.0458153	0.0132258
8.80422	121.037	168.863	176.436	117.68	140.561	106.569	135.575	147.181	132.792	124.787	260.677	130.266		8.80422	106.037	153.863	161.436	102.68	125.561	91.569	120.575	132.181	117.792	109.787	245.677	115.266		8.80422	0.64766	0.725482	0.767398	0.672488	0.70365	0.658762	0.654627	0.637242	0.703715	0.685373	0.767836	0.719936	0.695347	0.0440727	0.0127227
8.82544	120.577	165.419	173.794	118.711	136.841	102.979	132.578	145.112	132.045	125.888	267.323	133.567		8.82544	105.577	150.419	158.794	103.711	121.841	87.979	117.578	130.112	117.045	110.888	252.323	118.567		8.82544	0.64485	0.709243	0.754839	0.679241	0.682803	0.632935	0.638355	0.627267	0.699252	0.692246	0.788607	0.740553	0.690849	0.0513458	0.0148223
8.84666	121.775	168.039	176.984	119.075	143.23	109.344	132.71	147.88	133.762	126.792	261.548	131.003		8.84666	106.775	153.039	161.984	104.075	128.23	94.344	117.71	132.88	118.762	111.792	246.548	116.003		8.84666	0.652168	0.721597	0.770003	0.681625	0.718607	0.678726	0.639072	0.640611	0.70951	0.69789	0.770558	0.724539	0.700409	0.0444193	0.0128227
8.86787	123.211	171.638	176.618	121.007	137.539	105.374	133.207	148.184	133.123	126.124	262.675	132.064		8.86787	108.211	156.638	161.618	106.007	122.539	90.374	118.207	133.184	118.123	111.124	247.675	117.064		8.86787	0.660939	0.738567	0.768263	0.694278	0.686714	0.650165	0.64177	0.642077	0.705692	0.693719	0.77408	0.731166	0.698953	0.0463478	0.0133795
8.88909	121.6	170.675	175.313	115.509	139.089	106.698	133.452	146.525	136.341	122.741	254.913	131.505		8.88909	106.6	155.675	160.313	100.509	124.089	91.698	118.452	131.525	121.341	107.741	239.913	116.505		8.88909	0.651099	0.734026	0.762059	0.65827	0.695401	0.659691	0.643101	0.634079	0.724917	0.6726	0.749821	0.727674	0.692728	0.0450818	0.013014
8.9103	121.116	167.384	175.681	119.829	139.054	108.336	132.089	147.184	132.132	124.214	259.582	127.915		8.9103	106.116	152.384	160.681	104.829	124.054	93.336	117.089	132.184	117.132	109.214	244.582	112.915		8.9103	0.648143	0.718509	0.763809	0.686563	0.695204	0.671475	0.635701	0.637256	0.699772	0.681796	0.764413	0.705252	0.692324	0.0426326	0.012307
8.93152	118.019	172.607	176.005	120.061	137.955	110.042	134.627	149.322	131.889	123.368	264.188	129.624		8.93152	103.019	157.607	161.005	105.061	122.955	95.042	119.627	134.322	116.889	108.368	249.188	114.624		8.93152	0.629227	0.743136	0.765349	0.688082	0.689046	0.683748	0.64948	0.647563	0.69832	0.676514	0.778809	0.715926	0.6971	0.0465989	0.0134519
8.95274	121.055	167.564	177.553	119.536	139.928	107.587	135.994	152.433	136.549	125.667	262.382	130.59		8.95274	106.055	152.564	162.553	104.536	124.928	92.587	120.994	137.433	121.549	110.667	247.382	115.59		8.95274	0.64777	0.719357	0.772707	0.684644	0.700102	0.666086	0.656902	0.662561	0.72616	0.690866	0.773164	0.721959	0.701857	0.042207	0.0121841
8.97395	120.331	169.661	178.274	118.523	135.667	108.226	137.602	149.119	133.827	127.067	261.62	129.049		8.97395	105.331	154.661	163.274	103.523	120.667	93.226	122.602	134.119	118.827	112.067	246.62	114.049		8.97395	0.643348	0.729245	0.776135	0.678009	0.676223	0.670683	0.665632	0.646585	0.709898	0.699606	0.770783	0.712334	0.698207	0.0437201	0.0126209
8.99517	124.161	171.298	172.656	119.724	139.799	105.574	134.716	151.513	133.223	127.15	259.545	132.206		8.99517	109.161	156.298	157.656	104.724	124.799	90.574	119.716	136.513	118.223	112.15	244.545	117.206		8.99517	0.666741	0.736964	0.749429	0.685875	0.699379	0.651604	0.649963	0.658126	0.70629	0.700124	0.764298	0.732053	0.700071	0.039215	0.0113204
9.01638	121.745	167.943	177.745	115.521	137.826	107.007	135.37	147.023	132.773	123.881	254.138	133.773		9.01638	106.745	152.943	162.745	100.521	122.826	92.007	120.37	132.023	117.773	108.881	239.138	118.773		9.01638	0.651984	0.721144	0.77362	0.658348	0.688323	0.661914	0.653514	0.63648	0.703601	0.679717	0.747399	0.74184	0.693157	0.0442613	0.0127771
9.0376	125.204	169.382	178.053	120.898	134.858	105.117	135.801	148.519	129.603	126.657	259.546	131.079		9.0376	110.204	154.382	163.053	105.898	119.858	90.117	120.801	133.519	114.603	111.657	244.546	116.079		9.0376	0.673112	0.727929	0.775084	0.693564	0.67169	0.648317	0.655854	0.643692	0.684663	0.697047	0.764301	0.725013	0.696689	0.0433242	0.0125066
9.05882	122.504	170.337	176.663	120.987	135.536	105.925	135.728	148.517	135.195	126.184	259.976	133.581		9.05882	107.504	155.337	161.663	105.987	120.536	90.925	120.728	133.517	120.195	111.184	244.976	118.581		9.05882	0.65662	0.732432	0.768477	0.694147	0.675489	0.654129	0.655457	0.643682	0.718071	0.694094	0.765645	0.740641	0.699907	0.0445582	0.0128628
9.08003	124.763	168.119	176.427	119.711	136.835	107.235	136.309	151.063	134.941	125.263	258.948	130.166		9.08003	109.763	153.119	161.427	104.711	121.835	92.235	121.309	136.063	119.941	110.263	243.948	115.166		9.08003	0.670418	0.721974	0.767355	0.68579	0.682769	0.663554	0.658612	0.655957	0.716553	0.688344	0.762432	0.719311	0.699422	0.0381994	0.0110272
9.10125	122.748	166.353	179.885	117.565	136.837	110.868	137.399	149.207	130.51	129.575	265.036	130.555		9.10125	107.748	151.353	164.885	102.565	121.837	95.868	122.399	134.207	115.51	114.575	250.036	115.555		9.10125	0.658111	0.713647	0.783793	0.671735	0.68278	0.68969	0.66453	0.647009	0.690081	0.715263	0.781459	0.721741	0.701653	0.0443508	0.012803
9.12246	123.78	165.489	174.499	120.995	134.058	109.665	134.099	149.034	134.713	124.155	265.846	132.738		9.12246	108.78	150.489	159.499	105.995	119.058	94.665	119.099	134.034	119.713	109.155	250.846	117.738		9.12246	0.664414	0.709573	0.75819	0.694199	0.667207	0.681036	0.646613	0.646175	0.715191	0.681427	0.783991	0.735375	0.698616	0.0435041	0.0125586
9.14368	122.157	164.522	181.601	119.961	135.653	107.042	140.21	149.446	133.802	127.516	266.174	130.992		9.14368	107.157	149.522	166.601	104.961	120.653	92.042	125.21	134.446	118.802	112.516	251.174	115.992		9.14368	0.654501	0.705014	0.79195	0.687427	0.676145	0.662165	0.679791	0.648161	0.709749	0.702409	0.785016	0.72447	0.702233	0.0463895	0.0133915
9.1649	123.905	164.444	177.449	118.649	138.009	109.854	138.234	151.047	135.409	126.832	262.29	131.184		9.1649	108.905	149.444	162.449	103.649	123.009	94.854	123.234	136.047	120.409	111.832	247.29	116.184		9.1649	0.665177	0.704646	0.772213	0.678835	0.689348	0.682395	0.669063	0.655879	0.719349	0.698139	0.772877	0.725669	0.702799	0.0387037	0.0111728
9.18611	124.669	167.887	178.231	119.683	137.241	109.627	138.524	150.488	136.957	126.878	262.157	130.905		9.18611	109.669	152.887	163.231	104.683	122.241	94.627	123.524	135.488	121.957	111.878	247.157	115.905		9.18611	0.669844	0.72088	0.77593	0.685607	0.685044	0.680762	0.670638	0.653185	0.728597	0.698426	0.772461	0.723927	0.705442	0.0396044	0.0114328
9.20733	122.122	165.864	176.167	120.413	137.786	112.134	138.849	147.964	135.633	123.61	264.149	133.586		9.20733	107.122	150.864	161.167	105.413	122.786	97.134	123.849	132.964	120.633	108.61	249.149	118.586		9.20733	0.654287	0.711342	0.766119	0.690388	0.688098	0.698798	0.672402	0.641016	0.720687	0.678025	0.778687	0.740672	0.703377	0.0423042	0.0122122
9.22854	120.556	167.974	175.729	121.55	136.657	108.49	136.654	150.309	133.247	122.369	266.188	129.211		9.22854	105.556	152.974	160.729	106.55	121.657	93.49	121.654	135.309	118.247	107.369	251.188	114.211		9.22854	0.644722	0.72129	0.764037	0.697834	0.681771	0.672582	0.660485	0.652322	0.706433	0.670278	0.78506	0.713346	0.697513	0.0434813	0.012552
9.24976	120.917	168.756	177.213	118.354	134.805	110.79	132.164	154.586	135.48	123.633	262.18	129.852		9.24976	105.917	153.756	162.213	103.354	119.805	95.79	117.164	139.586	120.48	108.633	247.18	114.852		9.24976	0.646927	0.724978	0.771091	0.676903	0.671393	0.689129	0.636108	0.672941	0.719773	0.678169	0.772533	0.71735	0.698108	0.0438652	0.0126628
9.27098	121.584	169.747	176.476	120.44	135.251	111.812	135.81	149.213	135.267	127.831	253.007	132.608		9.27098	106.584	154.747	161.476	105.44	120.251	96.812	120.81	134.213	120.267	112.831	238.007	117.608		9.27098	0.651001	0.72965	0.767588	0.690565	0.673892	0.696481	0.655903	0.647038	0.718501	0.704376	0.743864	0.734563	0.701118	0.0391336	0.0112969
9.29219	118.578	167.092	173.528	122.332	139.779	108.916	133.474	150.262	133.487	129.099	262.228	128.076		9.29219	103.578	152.092	158.528	107.332	124.779	93.916	118.474	135.262	118.487	114.099	247.228	113.076		9.29219	0.632641	0.717132	0.753574	0.702956	0.699267	0.675647	0.64322	0.652095	0.707867	0.712292	0.772683	0.706257	0.697969	0.0418956	0.0120942
9.31341	118.65	168.543	172.93	118.977	134.913	107.54	136.41	151.068	134.374	125.154	262.828	129.101		9.31341	103.65	153.543	157.93	103.977	119.913	92.54	121.41	136.068	119.374	110.154	247.828	114.101		9.31341	0.633081	0.723973	0.750732	0.680983	0.671998	0.665748	0.65916	0.655981	0.713166	0.687664	0.774558	0.712659	0.694142	0.0417613	0.0120555
9.33462	121.319	166.942	174.499	118.155	135.713	110.019	134.819	148.213	130.202	125.468	261.641	129.154		9.33462	106.319	151.942	159.499	103.155	120.713	95.019	119.819	133.213	115.202	110.468	246.641	114.154		9.33462	0.649383	0.716424	0.75819	0.675599	0.676481	0.683582	0.650522	0.642217	0.688241	0.689624	0.770849	0.71299	0.692842	0.0407234	0.0117558
9.35584	124.02	167.129	171.634	122.554	137.55	108.72	137.823	150.967	137.19	123.548	269.226	131.269		9.35584	109.02	152.129	156.634	107.554	122.55	93.72	122.823	135.967	122.19	108.548	254.226	116.269		9.35584	0.66588	0.717306	0.744571	0.70441	0.686776	0.674237	0.666832	0.655494	0.729989	0.677638	0.794555	0.7262	0.703657	0.0407377	0.01176
9.37706	121.384	169.394	171.927	121.494	136.561	109.11	131.353	154.032	135.601	125.701	270.721	130.209		9.37706	106.384	154.394	156.927	106.494	121.561	94.11	116.353	139.032	120.601	110.701	255.721	115.209		9.37706	0.64978	0.727986	0.745964	0.697468	0.681234	0.677043	0.631705	0.67027	0.720496	0.691079	0.799227	0.71958	0.700986	0.0452961	0.0130759
9.39827	120.671	169.912	177.758	117.099	140.957	110.103	133.405	147.791	133.474	128.823	260.804	128.164		9.39827	105.671	154.912	162.758	102.099	125.957	95.103	118.405	132.791	118.474	113.823	245.804	113.164		9.39827	0.645425	0.730428	0.773682	0.668683	0.705869	0.684187	0.642845	0.640182	0.707789	0.710569	0.768233	0.706807	0.698725	0.0450235	0.0129972
9.41949	119.307	168.822	178.568	116.559	138.083	111.646	136.609	150.396	132.43	126.796	262.585	128.101		9.41949	104.307	153.822	163.568	101.559	123.083	96.646	121.609	135.396	117.43	111.796	247.585	113.101		9.41949	0.637093	0.725289	0.777532	0.665147	0.689763	0.695287	0.660241	0.652741	0.701552	0.697915	0.773799	0.706413	0.698564	0.0439353	0.012683
9.4407	125.868	169.028	174.751	120.372	139.447	110.772	133.411	147.723	132.479	126.28	261.26	130.268		9.4407	110.868	154.028	159.751	105.372	124.447	95.772	118.411	132.723	117.479	111.28	246.26	115.268		9.4407	0.677167	0.72626	0.759388	0.690119	0.697407	0.689	0.642878	0.639855	0.701845	0.694693	0.769658	0.719948	0.700685	0.0394504	0.0113884
9.46192	124.949	168.54	177.4	117.956	136.103	107.99	131.614	151.675	133.8	125.754	260.495	128.863		9.46192	109.949	153.54	162.4	102.956	121.103	92.99	116.614	136.675	118.8	110.754	245.495	113.863		9.46192	0.671554	0.723959	0.77198	0.674296	0.678667	0.668985	0.633122	0.658907	0.709737	0.69141	0.767267	0.711173	0.696755	0.0420987	0.0121528
9.48314	125.267	167.672	177.449	115.413	137.957	107.98	128.342	146.744	130.941	125.549	261.495	131.409		9.48314	110.267	152.672	162.449	100.413	122.957	92.98	113.342	131.744	115.941	110.549	246.495	116.409		9.48314	0.673496	0.719866	0.772213	0.657641	0.689057	0.668913	0.615357	0.635135	0.692656	0.69013	0.770392	0.727075	0.692661	0.0483898	0.0139689
9.50435	126.814	166.187	175.403	119.432	140.465	109.933	133.993	150.58	132.363	126.077	263.4	133.552		9.50435	111.814	151.187	160.403	104.432	125.465	94.933	118.993	135.58	117.363	111.077	248.4	118.552		9.50435	0.682945	0.712865	0.762487	0.683963	0.703112	0.682964	0.646038	0.653628	0.701152	0.693426	0.776346	0.740459	0.703282	0.0397279	0.0114685
9.52557	124.206	168.686	173.697	119.137	139.903	109.034	133.255	148.284	136.998	128.021	254.947	130.412		9.52557	109.206	153.686	158.697	104.137	124.903	94.034	118.255	133.284	121.998	113.021	239.947	115.412		9.52557	0.667016	0.724648	0.754378	0.682031	0.699962	0.676496	0.642031	0.642559	0.728842	0.705562	0.749927	0.720847	0.699525	0.0381087	0.011001
9.54678	126.625	161.879	176.287	118.437	139.39	110.678	132.238	148.95	134.778	124.666	260.85	131.232		9.54678	111.625	146.879	161.287	103.437	124.39	95.678	117.238	133.95	119.778	109.666	245.85	116.232		9.54678	0.681791	0.692552	0.766689	0.677446	0.697087	0.688323	0.63651	0.64577	0.715579	0.684617	0.768376	0.725969	0.698393	0.0407409	0.0117609
9.568	122.985	168.674	179.273	114.706	139.324	109.68	134.032	149.981	133.507	124.89	258.346	129.892		9.568	107.985	153.674	164.273	99.706	124.324	94.68	119.032	134.981	118.507	109.89	243.346	114.892		9.568	0.659558	0.724591	0.780884	0.653011	0.696717	0.681144	0.64625	0.65074	0.707986	0.686016	0.76055	0.7176	0.697087	0.0434909	0.0125547
9.58922	123.831	164.898	179.27	119.108	137.763	108.631	134.285	148.136	131.084	126.537	264.265	128.985		9.58922	108.831	149.898	164.27	104.108	122.763	93.631	119.285	133.136	116.084	111.537	249.265	113.985		9.58922	0.664725	0.706787	0.780869	0.681841	0.68797	0.673597	0.647623	0.641846	0.693511	0.696298	0.77905	0.711935	0.697171	0.0441877	0.0127559
9.61043	124.885	165.514	180.189	116.358	141.114	110.455	133.244	148.071	134.5	124.026	269.049	132.123		9.61043	109.885	150.514	165.189	101.358	126.114	95.455	118.244	133.071	119.5	109.026	254.049	117.123		9.61043	0.671163	0.709691	0.785238	0.66383	0.706749	0.686719	0.641971	0.641532	0.713919	0.680622	0.794001	0.731534	0.702247	0.0494021	0.0142612
9.63165	126.547	167.482	179.382	114.228	138.641	107.277	133.495	148.976	134.573	125.077	262.466	130.145		9.63165	111.547	152.482	164.382	99.228	123.641	92.277	118.495	133.976	119.573	110.077	247.466	115.145		9.63165	0.681314	0.718971	0.781402	0.64988	0.69289	0.663856	0.643334	0.645895	0.714355	0.687183	0.773427	0.71918	0.697641	0.0461278	0.0133159
9.65286	124.656	166.559	181.165	118.84	136.808	110.522	136.94	150.091	137.221	122.691	266.656	130.763		9.65286	109.656	151.559	166.165	103.84	121.808	95.522	121.94	135.091	122.221	107.691	251.656	115.763		9.65286	0.669764	0.714619	0.789877	0.680086	0.682618	0.687201	0.662038	0.651271	0.730174	0.672288	0.786522	0.72304	0.704125	0.046098	0.0133073
9.67408	124.747	168.911	179.416	117.951	139.712	111.512	133.775	146.867	137.346	124.753	254.911	127.763		9.67408	109.747	153.911	164.416	102.951	124.712	96.512	118.775	131.867	122.346	109.753	239.911	112.763		9.67408	0.67032	0.725709	0.781563	0.674263	0.698892	0.694323	0.644854	0.635728	0.730921	0.685161	0.749815	0.704302	0.699654	0.042359	0.012228
9.6953	123.896	171.918	180.903	120.531	138.373	107.81	132.957	147.641	131.78	121.96	268.681	132.042		9.6953	108.896	156.918	165.903	105.531	123.373	92.81	117.957	132.641	116.78	106.96	253.681	117.042		9.6953	0.665122	0.739887	0.788632	0.691161	0.691388	0.66769	0.640413	0.639459	0.697669	0.667725	0.792851	0.731028	0.701085	0.0519546	0.014998
9.71651	119.899	169.919	179.816	117.405	135.886	108.413	134.224	149.81	135.377	126.383	263.532	129.057		9.71651	104.899	154.919	164.816	102.405	120.886	93.413	119.224	134.81	120.377	111.383	248.532	114.057		9.71651	0.640709	0.730461	0.783465	0.670687	0.677451	0.672029	0.647292	0.649916	0.719158	0.695336	0.776759	0.712384	0.697971	0.0478928	0.0138255
9.73773	122.376	170.643	181.036	115.576	138.672	111.7	131.207	149.058	135.101	125.668	264.421	129.524		9.73773	107.376	155.643	166.036	100.576	123.672	96.7	116.207	134.058	120.101	110.668	249.421	114.524		9.73773	0.655839	0.733875	0.789264	0.658709	0.693064	0.695676	0.630912	0.646291	0.717509	0.690873	0.779537	0.715301	0.700571	0.049947	0.0144185
9.75894	120.472	169.668	180.131	120.559	139.654	111.043	129.783	150.555	134.062	126.438	266.983	131.863		9.75894	105.472	154.668	165.131	105.559	124.654	96.043	114.783	135.555	119.062	111.438	251.983	116.863		9.75894	0.644209	0.729278	0.784962	0.691344	0.698567	0.690949	0.623181	0.653508	0.711302	0.69568	0.787544	0.72991	0.703369	0.0504334	0.0145589
9.78016	123.461	169.085	177.273	118.644	136.054	109.67	134.756	146.268	134.671	122.399	257.71	131.882		9.78016	108.461	154.085	162.273	103.644	121.054	94.67	119.756	131.268	119.671	107.399	242.71	116.882		9.78016	0.662466	0.726529	0.771376	0.678802	0.678392	0.681072	0.65018	0.63284	0.71494	0.670465	0.758563	0.730029	0.696304	0.0434189	0.0125339
9.80138	120.642	169.912	179.718	116.188	136.889	109.339	133.859	152.543	136.678	124.242	260.692	134.027		9.80138	105.642	154.912	164.718	101.188	121.889	94.339	118.859	137.543	121.678	109.242	245.692	119.027		9.80138	0.645247	0.730428	0.782999	0.662717	0.683072	0.67869	0.64531	0.663092	0.72693	0.681971	0.767883	0.743426	0.70098	0.0475099	0.0137149
9.82259	122.861	168.635	174.428	119.931	137.122	106.582	134.331	147.464	133.606	121.954	264.385	130.318		9.82259	107.861	153.635	159.428	104.931	122.122	91.582	119.331	132.464	118.606	106.954	249.385	115.318		9.82259	0.658801	0.724407	0.757852	0.687231	0.684377	0.658856	0.647873	0.638606	0.708578	0.667687	0.779425	0.72026	0.694496	0.0444147	0.0128214
9.84381	119.492	169.014	177.404	119.562	133.562	109.279	132.418	147.289	133.005	120.516	270.32	129.869		9.84381	104.492	154.014	162.404	104.562	118.562	94.279	117.418	132.289	118.005	105.516	255.32	114.869		9.84381	0.638223	0.726194	0.771999	0.684814	0.664427	0.678259	0.637487	0.637762	0.704987	0.65871	0.797974	0.717456	0.693191	0.0526683	0.015204
9.86502	122.775	172.389	178.501	118.603	130.615	104.384	134.564	151.002	133.751	121.141	264.989	130.065		9.86502	107.775	157.389	163.501	103.603	115.615	89.384	119.564	136.002	118.751	106.141	249.989	115.065		9.86502	0.658276	0.742108	0.777214	0.678533	0.647912	0.643043	0.649138	0.655663	0.709444	0.662612	0.781312	0.71868	0.693661	0.0508226	0.0146712
9.88624	122.446	168.25	181.629	120.287	133.407	106.496	131.579	151.09	135.708	120.365	267.259	129.612		9.88624	107.446	153.25	166.629	105.287	118.407	91.496	116.579	136.09	120.708	105.365	252.259	114.612		9.88624	0.656266	0.722592	0.792083	0.689563	0.663558	0.658237	0.632932	0.656087	0.721135	0.657767	0.788407	0.715851	0.696207	0.0527727	0.0152342
9.90746	123.94	171.691	178.314	118.025	138.762	106.046	136.472	147.249	137.26	122.797	269.037	131.334		9.90746	108.94	156.691	163.314	103.025	123.762	91.046	121.472	132.249	122.26	107.797	254.037	116.334		9.90746	0.665391	0.738817	0.776325	0.674748	0.693568	0.655	0.659497	0.637569	0.730407	0.67295	0.793964	0.726606	0.70207	0.0503751	0.014542
9.92867	121.869	166.461	182.028	117.43	136.743	108.358	137.43	153.436	138.213	121.451	266.265	132.838		9.92867	106.869	151.461	167.028	102.43	121.743	93.358	122.43	138.436	123.213	106.451	251.265	117.838		9.92867	0.652742	0.714156	0.79398	0.670851	0.682253	0.671633	0.664698	0.667397	0.736101	0.664547	0.7853	0.736	0.703305	0.0491248	0.0141811
9.94989	120.976	168.853	178.91	119.172	138.412	107.362	133.583	146.711	137.19	124.412	261.718	132.309		9.94989	105.976	153.853	163.91	104.172	123.412	92.362	118.583	131.711	122.19	109.412	246.718	117.309		9.94989	0.647288	0.725435	0.779158	0.68226	0.691607	0.664467	0.643812	0.634976	0.729989	0.683032	0.771089	0.732696	0.698817	0.0486338	0.0140394
9.9711	122.476	168.992	177.378	119.667	133.366	109.727	134.454	148.456	132.929	120.486	267.881	133.437		9.9711	107.476	153.992	162.378	104.667	118.366	94.727	119.454	133.456	117.929	105.486	252.881	118.437		9.9711	0.656449	0.72609	0.771876	0.685502	0.663329	0.681482	0.648541	0.643388	0.704533	0.658523	0.790351	0.739741	0.697484	0.0494533	0.0142759
9.99232	122.299	169.245	179.23	120.089	140.574	107.34	133.267	145.05	133.746	123.373	263.069	126.296		9.99232	107.299	154.245	164.23	105.089	125.574	92.34	118.267	130.05	118.746	108.373	248.069	111.296		9.99232	0.655368	0.727283	0.780679	0.688266	0.703723	0.664309	0.642096	0.626968	0.709414	0.676546	0.775312	0.695139	0.695425	0.0480913	0.0138828
10.0135	121.538	172.096	181.128	120.066	141.002	106.348	137.9	148.736	133.836	121.925	264.587	128.641		10.0135	106.538	157.096	166.128	105.066	126.002	91.348	122.9	133.736	118.836	106.925	249.587	113.641		10.0135	0.65072	0.740726	0.789701	0.688115	0.706121	0.657173	0.66725	0.644738	0.709952	0.667506	0.780056	0.709786	0.700987	0.0485431	0.0140132
10.0348	123.331	168.182	177.333	120.093	136.847	104.996	135.77	143.916	135.379	123.387	262.001	129.005		10.0348	108.331	153.182	162.333	105.093	121.847	89.996	120.77	128.916	120.379	108.387	247.001	114.005		10.0348	0.661672	0.722271	0.771662	0.688292	0.682836	0.647446	0.655685	0.621501	0.71917	0.676633	0.771974	0.71206	0.694267	0.0469667	0.0135581
10.056	124.455	169.669	181.895	115.229	139.326	106.066	138.442	147.634	135.116	124.185	265.347	129.05		10.056	109.455	154.669	166.895	100.229	124.326	91.066	123.442	132.634	120.116	109.185	250.347	114.05		10.056	0.668537	0.729283	0.793347	0.656436	0.696729	0.655144	0.670192	0.639425	0.717599	0.681615	0.782431	0.712341	0.700257	0.0492061	0.0142046
10.0772	124.224	168.461	175.684	120.511	134.037	106.003	132.796	147.993	135.549	122.716	262.744	125.59		10.0772	109.224	153.461	160.684	105.511	119.037	91.003	117.796	132.993	120.549	107.716	247.744	110.59		10.0772	0.667126	0.723587	0.763823	0.69103	0.667089	0.654691	0.639539	0.641156	0.720186	0.672444	0.774296	0.69073	0.692141	0.0447991	0.0129324
10.0984	121.707	169.652	172.955	119.055	132.196	105.254	137.295	147.057	131.641	126.496	265.884	126.294		10.0984	106.707	154.652	157.955	104.055	117.196	90.254	122.295	132.057	116.641	111.496	250.884	111.294		10.0984	0.651752	0.729202	0.75085	0.681494	0.656772	0.649302	0.663965	0.636644	0.696838	0.696042	0.78411	0.695127	0.691008	0.0447355	0.012914
10.1196	122.564	170.612	176.543	118.492	134.415	109.783	134.871	150.646	131.459	121.72	268.952	130.189		10.1196	107.564	155.612	161.543	103.492	119.415	94.783	119.871	135.646	116.459	106.72	253.952	115.189		10.1196	0.656987	0.733729	0.767906	0.677806	0.669207	0.681885	0.650805	0.653946	0.695751	0.666226	0.793698	0.719455	0.697283	0.0468432	0.0135225
10.1408	125.481	171.549	176.862	121.042	139.195	106.465	133.868	146.073	134.253	123.82	262.609	131.032		10.1408	110.481	156.549	161.862	106.042	124.195	91.465	118.868	131.073	119.253	108.82	247.609	116.032		10.1408	0.674803	0.738147	0.769423	0.694507	0.695995	0.658014	0.645359	0.6319	0.712443	0.679336	0.773874	0.72472	0.699877	0.0457184	0.0131978
10.162	125.922	168.579	174.727	120.447	133.993	111.019	133.326	146.698	132.639	126.39	263.199	126.109		10.162	110.922	153.579	159.727	105.447	118.993	96.019	118.326	131.698	117.639	111.39	248.199	111.109		10.162	0.677497	0.724143	0.759274	0.69061	0.666842	0.690777	0.642417	0.634913	0.702801	0.69538	0.775718	0.693971	0.696195	0.0416179	0.012014
10.1833	129.672	170.055	177.055	118.872	135.327	109.169	135.284	150.317	131.04	123.335	261.093	132.603		10.1833	114.672	155.055	162.055	103.872	120.327	94.169	120.284	135.317	116.04	108.335	246.093	117.603		10.1833	0.700402	0.731103	0.77034	0.680295	0.674318	0.677467	0.653047	0.65236	0.693248	0.676308	0.769136	0.734532	0.701046	0.0410221	0.0118421
10.2045	124.967	169.161	179.578	119.574	133.339	108.389	135.274	148.836	132.42	121.321	264.383	132.929		10.2045	109.967	154.161	164.578	104.574	118.339	93.389	120.274	133.836	117.42	106.321	249.383	117.929		10.2045	0.671664	0.726887	0.782333	0.684893	0.663177	0.671856	0.652993	0.64522	0.701492	0.663735	0.779418	0.736568	0.698353	0.0475019	0.0137126
10.2257	124.648	170.093	177.81	119.747	137.278	110.193	136.743	148.318	133.255	123.999	267.873	131.656		10.2257	109.648	155.093	162.81	104.747	122.278	95.193	121.743	133.318	118.255	108.999	252.873	116.656		10.2257	0.669716	0.731282	0.773929	0.686026	0.685252	0.684834	0.660968	0.642723	0.706481	0.680454	0.790326	0.728617	0.703384	0.044795	0.0129312
10.2469	123.524	171.346	166.858	118.878	136.926	109.826	134.312	146.692	132.029	124.742	264.144	129.233		10.2469	108.524	156.346	151.858	103.878	121.926	94.826	119.312	131.692	117.029	109.742	249.144	114.233		10.2469	0.66285	0.73719	0.721868	0.680334	0.683279	0.682194	0.64777	0.634884	0.699156	0.685092	0.778671	0.713484	0.693898	0.0397034	0.0114614
10.2681	123.109	169.153	173.293	117.781	137.897	112.338	132.609	149.317	134.698	123.455	261.704	131.862		10.2681	108.109	154.153	158.293	102.781	122.897	97.338	117.609	134.317	119.698	108.455	246.704	116.862		10.2681	0.660316	0.72685	0.752457	0.67315	0.688721	0.700266	0.638524	0.647539	0.715101	0.677058	0.771045	0.729904	0.698411	0.0416621	0.0120268
10.2893	122.274	172.033	176.187	122.34	136.819	111.463	133.199	146.803	135.521	123.645	261.034	131.386		10.2893	107.274	157.033	161.187	107.34	121.819	96.463	118.199	131.803	120.521	108.645	246.034	116.386		10.2893	0.655216	0.740429	0.766214	0.703008	0.682679	0.693971	0.641727	0.635419	0.720018	0.678244	0.768951	0.726931	0.701067	0.0450013	0.0129907
10.3106	128.204	170.05	173.708	120.771	133.993	112.696	136.453	144.591	135.781	126.718	261.079	130.33		10.3106	113.204	155.05	158.708	105.771	118.993	97.696	121.453	129.591	120.781	111.718	246.079	115.33		10.3106	0.691435	0.731079	0.75443	0.692732	0.666842	0.702841	0.659394	0.624755	0.721572	0.697428	0.769092	0.720335	0.702661	0.0405048	0.0116927
10.3318	126.358	166.554	173.41	121.441	136.712	110.017	135.717	147.296	133.203	125.312	257.443	134.822		10.3318	111.358	151.554	158.41	106.441	121.712	95.017	120.717	132.296	118.203	110.312	242.443	119.822		10.3318	0.68016	0.714595	0.753013	0.697121	0.68208	0.683568	0.655398	0.637796	0.70617	0.68865	0.757728	0.748392	0.700389	0.0377968	0.010911
10.353	123.71	168.463	173.383	118.252	132.853	106.531	133.315	150.635	137.532	122.63	255.528	132.788		10.353	108.71	153.463	158.383	103.252	117.853	91.531	118.315	135.635	122.532	107.63	240.528	117.788		10.353	0.663986	0.723596	0.752885	0.676235	0.660454	0.658489	0.642357	0.653893	0.732032	0.671907	0.751743	0.735688	0.693605	0.0418075	0.0120688
10.3742	123.417	169.804	175.648	119.745	132.824	108.888	133.084	148.259	130.932	123.03	252.951	130.715		10.3742	108.417	154.804	160.648	104.745	117.824	93.888	118.084	133.259	115.932	108.03	237.951	115.715		10.3742	0.662197	0.729919	0.763652	0.686013	0.660291	0.675446	0.641103	0.642439	0.692603	0.674404	0.743689	0.72274	0.691208	0.0401604	0.0115933
10.3954	121.958	164.481	174.995	120.292	138.406	107.346	135.069	149.006	135.386	122.67	259.299	134.842		10.3954	106.958	149.481	159.995	105.292	123.406	92.346	120.069	134.006	120.386	107.67	244.299	119.842		10.3954	0.653285	0.704821	0.760548	0.689595	0.691573	0.664352	0.65188	0.64604	0.719212	0.672157	0.763529	0.748517	0.697126	0.0426229	0.0123042
10.4166	124.329	165.023	176.129	120.408	135.498	105.75	133.234	153.832	134.606	125.42	263.661	132.562		10.4166	109.329	150.023	161.129	105.408	120.498	90.75	118.234	138.832	119.606	110.42	248.661	117.562		10.4166	0.667767	0.707376	0.765938	0.690355	0.675276	0.65287	0.641917	0.669306	0.714552	0.689325	0.777162	0.734276	0.698843	0.0427689	0.0123463
10.4379	122.808	165.472	175.032	121.065	137.187	107.415	135.932	147.66	135.246	125.649	257.342	131.627		10.4379	107.808	150.472	160.032	106.065	122.187	92.415	120.932	132.66	120.246	110.649	242.342	116.627		10.4379	0.658477	0.709493	0.760724	0.694658	0.684742	0.664849	0.656565	0.639551	0.718375	0.690754	0.757413	0.728436	0.697003	0.0392654	0.0113349
10.4591	123.422	163.522	178.935	121.466	139.471	110.545	135.036	149.23	134.414	122.554	260.589	132.049		10.4591	108.422	148.522	163.935	106.466	124.471	95.545	120.036	134.23	119.414	107.554	245.589	117.049		10.4591	0.662227	0.700299	0.779277	0.697284	0.697541	0.687366	0.6517	0.64712	0.713405	0.671433	0.767561	0.731072	0.700524	0.0421429	0.0121656
10.4803	121.09	168.271	176.575	121.287	141.586	108.431	131.921	145.662	131.306	121.994	259.658	131.351		10.4803	106.09	153.271	161.575	106.287	126.586	93.431	116.921	130.662	116.306	106.994	244.658	116.351		10.4803	0.647984	0.722691	0.768058	0.696112	0.709394	0.672158	0.634788	0.629919	0.694837	0.667937	0.764651	0.726712	0.694603	0.0462144	0.013341
10.5015	121.281	168.967	181.037	120.905	135.033	107.504	131.086	147.077	134.248	122.592	263.416	129.772		10.5015	106.281	153.967	166.037	105.905	120.033	92.504	116.086	132.077	119.248	107.592	248.416	114.772		10.5015	0.64915	0.725973	0.789269	0.69361	0.672671	0.665489	0.630255	0.63674	0.712413	0.67167	0.776396	0.71685	0.695041	0.0512178	0.0147853
10.5227	120.163	169.628	171.907	117.122	137.939	108.837	132.164	149.133	131.746	125.736	260.531	132.846		10.5227	105.163	154.628	156.907	102.122	122.939	93.837	117.164	134.133	116.746	110.736	245.531	117.846		10.5227	0.642322	0.729089	0.745869	0.668834	0.688956	0.675079	0.636108	0.646652	0.697466	0.691297	0.767379	0.73605	0.693758	0.0430367	0.0124236
10.5439	122.449	171.728	177.904	120.253	138.595	109.816	133.32	150.13	133.852	121.492	259.795	128.753		10.5439	107.449	156.728	162.904	105.253	123.595	94.816	118.32	135.13	118.852	106.492	244.795	113.753		10.5439	0.656284	0.738991	0.774376	0.68934	0.692632	0.682122	0.642384	0.651459	0.710047	0.664803	0.765079	0.710486	0.698167	0.0434545	0.0125442
10.5652	121.53	171.61	174.785	119.306	139.79	112.105	135.837	151.766	133.142	126.023	254.743	134.352		10.5652	106.53	156.61	159.785	104.306	124.79	97.105	120.837	136.766	118.142	111.023	239.743	119.352		10.5652	0.650671	0.738435	0.75955	0.683138	0.699329	0.698589	0.656049	0.659346	0.705806	0.693089	0.74929	0.745456	0.703229	0.0378754	0.0109337
10.5864	122.237	169.032	176.729	120.154	134.509	111.409	131.327	152.235	130.922	123.365	257.601	132.94		10.5864	107.237	154.032	161.729	105.154	119.509	96.409	116.327	137.235	115.922	108.365	242.601	117.94		10.5864	0.65499	0.726279	0.76879	0.688691	0.669734	0.693582	0.631564	0.661607	0.692543	0.676496	0.758222	0.736637	0.696595	0.0425252	0.012276
10.6076	120.119	168.182	177.557	118.286	136.604	110.97	134.896	145.995	132.614	121.439	258.477	132.696		10.6076	105.119	153.182	162.557	103.286	121.604	95.97	119.896	130.995	117.614	106.439	243.477	117.696		10.6076	0.642053	0.722271	0.772726	0.676457	0.681474	0.690424	0.65094	0.631524	0.702651	0.664472	0.76096	0.735113	0.694256	0.0457764	0.0132145
10.6288	120.693	173.245	174.047	117.32	135.39	106.832	130.989	147.674	135.098	119.778	257.862	131.275		10.6288	105.693	158.245	159.047	102.32	120.39	91.832	115.989	132.674	120.098	104.778	242.862	116.275		10.6288	0.645559	0.746144	0.756041	0.670131	0.674671	0.660655	0.629728	0.639618	0.717491	0.654103	0.759038	0.726238	0.689951	0.0479339	0.0138373
10.65	121.733	170.879	167.785	117.574	134.428	108.522	133.107	148.554	132.47	121.662	262.975	132.236		10.65	106.733	155.879	152.785	102.574	119.428	93.522	118.107	133.554	117.47	106.662	247.975	117.236		10.65	0.651911	0.734988	0.726275	0.671794	0.66928	0.672813	0.641228	0.643861	0.701791	0.665864	0.775018	0.73224	0.690588	0.0427295	0.0123349
10.6712	120.871	171.781	178.019	118.399	136.558	107.789	133.972	145.604	131.911	120.699	267.947	129.395		10.6712	105.871	156.781	163.019	103.399	121.558	92.789	118.972	130.604	116.911	105.699	252.947	114.395		10.6712	0.646646	0.739241	0.774923	0.677197	0.681217	0.667539	0.645924	0.629639	0.698451	0.659852	0.790557	0.714495	0.693807	0.0516685	0.0149154
10.6924	121.465	166.287	177.564	121.966	137.594	108.963	135.027	145.669	133.137	123.385	263.367	128.851		10.6924	106.465	151.287	162.564	106.966	122.594	93.963	120.027	130.669	118.137	108.385	248.367	113.851		10.6924	0.650274	0.713336	0.77276	0.700559	0.687022	0.675985	0.651652	0.629952	0.705776	0.676621	0.776243	0.711098	0.69594	0.0449772	0.0129838
10.7137	124.083	166.79	177.204	121.53	135.34	105.745	134.51	146.208	131.836	124.329	259.793	129.781		10.7137	109.083	151.79	162.204	106.53	120.34	90.745	119.51	131.208	116.836	109.329	244.793	114.781		10.7137	0.666265	0.715708	0.771048	0.697703	0.674391	0.652834	0.648845	0.632551	0.698003	0.682514	0.765073	0.716906	0.693487	0.0434905	0.0125546
10.7349	125.3	168.339	177.766	119.866	141.505	109.854	134.307	149.813	135.886	121.796	257.065	131.031		10.7349	110.3	153.339	162.766	104.866	126.505	94.854	119.307	134.813	120.886	106.796	242.065	116.031		10.7349	0.673698	0.723011	0.77372	0.686805	0.70894	0.682395	0.647743	0.64993	0.722199	0.666701	0.756547	0.724714	0.701367	0.0402777	0.0116272
10.7561	120.153	167.646	174.414	120.249	137.568	115.517	136.202	146.209	133.776	122.604	260.618	131.917		10.7561	105.153	152.646	159.414	105.249	122.568	100.517	121.202	131.209	118.776	107.604	245.618	116.917		10.7561	0.642261	0.719744	0.757786	0.689314	0.686877	0.723136	0.658031	0.632556	0.709593	0.671745	0.767651	0.730247	0.699078	0.0432398	0.0124823
10.7773	120.178	167.951	170.954	120.349	138.564	109.431	132.758	149.468	129.338	122.023	258.645	131.04		10.7773	105.178	152.951	155.954	105.349	123.564	94.431	117.758	134.468	114.338	107.023	243.645	116.04		10.7773	0.642413	0.721182	0.741339	0.689969	0.692458	0.679352	0.639333	0.648267	0.68308	0.668118	0.761485	0.72477	0.69098	0.0394679	0.0113934
10.7985	124.081	167.569	172.849	120.222	139.669	108.683	135.025	148.682	132.314	119.488	263.912	132.728		10.7985	109.081	152.569	157.849	105.222	124.669	93.683	120.025	133.682	117.314	104.488	248.912	117.728		10.7985	0.666252	0.719381	0.750347	0.689137	0.698651	0.673971	0.651641	0.644478	0.700859	0.652293	0.777946	0.735313	0.696689	0.0423575	0.0122276
10.8197	122.544	167.89	174.763	122.348	138.234	111.467	132.842	150.091	134.081	120.481	259.535	127.975		10.8197	107.544	152.89	159.763	107.348	123.234	96.467	117.842	135.091	119.081	105.481	244.535	112.975		10.8197	0.656865	0.720894	0.759445	0.703061	0.690609	0.693999	0.639789	0.651271	0.711415	0.658492	0.764267	0.705626	0.696311	0.040245	0.0116177
10.841	126.327	169.094	174.105	120.763	136.192	111.184	136.048	146.609	136.018	123.409	265.656	133.555		10.841	111.327	154.094	159.105	105.763	121.192	96.184	121.048	131.609	121.018	108.409	250.656	118.555		10.841	0.679971	0.726571	0.756317	0.69268	0.679166	0.691964	0.657195	0.634484	0.722987	0.67677	0.783397	0.740478	0.703498	0.0431387	0.0124531
10.8622	127.622	168.125	172.916	120.464	142.539	111.646	135.168	149.967	134.773	123.636	268.692	132.359		10.8622	112.622	153.125	157.916	105.464	127.539	96.646	120.168	134.967	119.773	108.636	253.692	117.359		10.8622	0.68788	0.722002	0.750665	0.690722	0.714734	0.695287	0.652417	0.650673	0.71555	0.678187	0.792886	0.733008	0.707001	0.0405276	0.0116993
10.8834	125.553	170.688	170.136	123.999	135.364	108.912	135.517	146.697	131.142	124.792	268.06	129.988		10.8834	110.553	155.688	155.136	108.999	120.364	93.912	120.517	131.697	116.142	109.792	253.06	114.988		10.8834	0.675243	0.734087	0.73745	0.713874	0.674525	0.675618	0.654312	0.634908	0.693857	0.685404	0.79091	0.718199	0.699032	0.0423975	0.0122391
10.9046	122.115	168.329	172.417	122.506	135.552	109.273	136.199	146.808	132.888	121.911	261.082	128.237		10.9046	107.115	153.329	157.417	107.506	120.552	94.273	121.199	131.808	117.888	106.911	246.082	113.237		10.9046	0.654244	0.722964	0.748293	0.704096	0.675579	0.678215	0.658015	0.635443	0.704288	0.667419	0.769101	0.707263	0.693743	0.0397826	0.0114842
10.9258	119.8	170.905	172.714	120.977	134.121	111.819	133.864	148.117	132.493	125.101	262.414	127.951		10.9258	104.8	155.905	157.714	105.977	119.121	96.819	118.864	133.117	117.493	110.101	247.414	112.951		10.9258	0.640105	0.73511	0.749705	0.694082	0.66756	0.696532	0.645337	0.641754	0.701928	0.687333	0.773265	0.705476	0.694849	0.0426553	0.0123135
10.947	122.839	167.607	176.173	119.532	141.118	112.236	128.217	147.541	133.756	125.588	263.175	130.101		10.947	107.839	152.607	161.173	104.532	126.118	97.236	113.217	132.541	118.756	110.588	248.175	115.101		10.947	0.658666	0.71956	0.766147	0.684618	0.706771	0.699532	0.614679	0.638977	0.709474	0.690373	0.775643	0.718905	0.698612	0.0467015	0.0134816
10.9683	123.299	171.421	173.173	119.264	134.894	111.127	134.268	148.566	132.976	122.252	263.072	132.046		10.9683	108.299	156.421	158.173	104.264	119.894	96.127	119.268	133.566	117.976	107.252	248.072	117.046		10.9683	0.661476	0.737543	0.751887	0.682863	0.671892	0.691553	0.647531	0.643919	0.704814	0.669547	0.775321	0.731053	0.69745	0.0427988	0.012355
10.9895	123.603	171.021	177.27	117.353	134.304	108.798	135.665	149.767	132.784	120.749	262.447	128.676		10.9895	108.603	156.021	162.27	102.353	119.304	93.798	120.665	134.767	117.784	105.749	247.447	113.676		10.9895	0.663333	0.735657	0.771362	0.670347	0.668585	0.674798	0.655115	0.649709	0.703667	0.660165	0.773368	0.710005	0.694676	0.0442069	0.0127614
11.0107	123.682	170.832	175.385	117.744	137.319	110.157	134.357	149.357	134.304	122.344	267.649	132.848		11.0107	108.682	155.832	160.385	102.744	122.319	95.157	119.357	134.357	119.304	107.344	252.649	117.848		11.0107	0.663815	0.734766	0.762402	0.672908	0.685481	0.684575	0.648014	0.647732	0.712748	0.670122	0.789626	0.736062	0.700688	0.0461342	0.0133178
11.0319	119.853	171.66	175.93	120.023	136.963	108.952	137.086	149.586	132.252	124.249	259.048	134.985		11.0319	104.853	156.66	160.93	105.023	121.963	93.952	122.086	134.586	117.252	109.249	244.048	119.985		11.0319	0.640428	0.73867	0.764992	0.687834	0.683486	0.675906	0.66283	0.648836	0.700489	0.682014	0.762744	0.74941	0.699803	0.0436621	0.0126042
11.0531	120.346	169.703	176.468	120.041	138.567	111.009	136.893	149.566	132.29	123.331	266.283	133.901		11.0531	105.346	154.703	161.468	105.041	123.567	96.009	121.893	134.566	117.29	108.331	251.283	118.901		11.0531	0.64344	0.729443	0.76755	0.687951	0.692475	0.690705	0.661782	0.64874	0.700716	0.676283	0.785357	0.742639	0.702257	0.0453382	0.013088
11.0743	120.455	169.258	175.572	121.032	135.669	109.571	135.269	147.407	127.744	122.041	263.878	129.615		11.0743	105.455	154.258	160.572	106.032	120.669	94.571	120.269	132.407	112.744	107.041	248.878	114.615		11.0743	0.644105	0.727345	0.763291	0.694442	0.676235	0.680359	0.652965	0.638331	0.673557	0.66823	0.77784	0.715869	0.692714	0.0449817	0.0129851
11.0956	120.111	170.617	171.093	121.159	140.557	108.756	137.241	148.855	133.295	121.116	257.213	132.445		11.0956	105.111	155.617	156.093	106.159	125.557	93.756	122.241	133.855	118.295	106.116	242.213	117.445		11.0956	0.642004	0.733753	0.741999	0.695274	0.703627	0.674496	0.663672	0.645312	0.70672	0.662456	0.757009	0.733545	0.696656	0.0392649	0.0113348
11.1168	123.103	164.211	175.913	119.857	140.269	110.306	134.224	146.854	133.053	122.454	261.498	131.439		11.1168	108.103	149.211	160.913	104.857	125.269	95.306	119.224	131.854	118.053	107.454	246.498	116.439		11.1168	0.660279	0.703547	0.764912	0.686746	0.702013	0.685647	0.647292	0.635665	0.705274	0.670809	0.770402	0.727262	0.696654	0.0421598	0.0121705
11.138	122.145	167.215	172.889	118.278	135.808	108.412	134.971	148.804	131.387	120.926	258.59	130.08		11.138	107.145	152.215	157.889	103.278	120.808	93.412	119.971	133.804	116.387	105.926	243.59	115.08		11.138	0.654428	0.717712	0.750537	0.676405	0.677014	0.672021	0.651348	0.645066	0.695321	0.66127	0.761313	0.718774	0.690101	0.0389112	0.0112327
11.1592	123.054	169.154	172.004	117.648	137.111	106.286	135.883	145.793	130.34	124.714	262.656	133.83		11.1592	108.054	154.154	157.004	102.648	122.111	91.286	120.883	130.793	115.34	109.714	247.656	118.83		11.1592	0.65998	0.726854	0.74633	0.672279	0.684316	0.656727	0.656299	0.63055	0.689066	0.684917	0.774021	0.742196	0.693628	0.0439097	0.0126757
11.1804	126.151	166.2	178.518	115.456	130.568	109.044	135.305	143.111	130.854	125.511	260.994	133.582		11.1804	111.151	151.2	163.518	100.456	115.568	94.044	120.305	128.111	115.854	110.511	245.994	118.582		11.1804	0.678896	0.712926	0.777295	0.657923	0.647648	0.676568	0.653161	0.61762	0.692137	0.689893	0.768826	0.740647	0.692795	0.049136	0.0141843
11.2016	125.663	169.498	174.27	118.073	134.809	109.909	137.608	145.155	132.342	125.689	258.882	132.128		11.2016	110.663	154.498	159.27	103.073	119.809	94.909	122.608	130.155	117.342	110.689	243.882	117.128		11.2016	0.675915	0.728476	0.757101	0.675062	0.671415	0.682791	0.665664	0.627474	0.701026	0.691004	0.762226	0.731565	0.697477	0.040113	0.0115796
11.2228	123.292	168.591	173.599	119.179	132.83	106.663	136.336	146.272	133.172	125.405	259.069	129.382		11.2228	108.292	153.591	158.599	104.179	117.83	91.663	121.336	131.272	118.172	110.405	244.069	114.382		11.2228	0.661433	0.7242	0.753912	0.682306	0.660325	0.659439	0.658758	0.632859	0.705985	0.689231	0.76281	0.714414	0.692139	0.0407697	0.0117692
11.2441	124.657	169.481	172.878	117.961	136.465	111.593	135.192	150.608	133.855	122.422	264.503	133.96		11.2441	109.657	154.481	157.878	102.961	121.465	96.593	120.192	135.608	118.855	107.422	249.503	118.96		11.2441	0.669771	0.728396	0.750484	0.674329	0.680696	0.694906	0.652547	0.653763	0.710065	0.670609	0.779793	0.743008	0.700697	0.0414422	0.0119633
11.2653	124.745	168.04	178.795	117.752	133.599	111.944	133.4	150.559	132.069	123.568	260.447	132.027		11.2653	109.745	153.04	163.795	102.752	118.599	96.944	118.4	135.559	117.069	108.568	245.447	117.027		11.2653	0.670308	0.721602	0.778611	0.67296	0.664634	0.697431	0.642818	0.653527	0.699395	0.677763	0.767117	0.730935	0.698092	0.043546	0.0125706
11.2865	124.226	169.462	181.066	120.424	134.948	109.357	137.792	147.832	131.923	124.167	261.157	129.469		11.2865	109.226	154.462	166.066	105.424	119.948	94.357	122.792	132.832	116.923	109.167	246.157	114.469		11.2865	0.667138	0.728307	0.789407	0.69046	0.672194	0.67882	0.666663	0.64038	0.698523	0.681502	0.769336	0.714958	0.699807	0.0439302	0.0126816
11.3077	124.818	168.876	179.539	116.81	136.733	108.034	133.811	148.997	130.891	125.89	258.939	128.988		11.3077	109.818	153.876	164.539	101.81	121.733	93.034	118.811	133.997	115.891	110.89	243.939	113.988		11.3077	0.670754	0.725543	0.782148	0.66679	0.682197	0.669302	0.64505	0.645996	0.692358	0.692259	0.762404	0.711953	0.695563	0.0431418	0.012454
11.3289	123.579	167.864	179.1	117.887	134.045	108.541	135.058	147.164	132.661	124.72	258.984	130.55		11.3289	108.579	152.864	164.1	102.887	119.045	93.541	120.058	132.164	117.661	109.72	243.984	115.55		11.3289	0.663186	0.720772	0.780061	0.673844	0.667134	0.672949	0.65182	0.63716	0.702932	0.684955	0.762544	0.721709	0.694922	0.0439746	0.0126944
11.3501	124.181	166.987	176.07	115.363	136.373	109.377	137.002	148.598	134.257	124.448	266.144	128.938		11.3501	109.181	151.987	161.07	100.363	121.373	94.377	122.002	133.598	119.257	109.448	251.144	113.938		11.3501	0.666863	0.716637	0.765658	0.657313	0.68018	0.678964	0.662374	0.644073	0.712467	0.683257	0.784922	0.711641	0.697029	0.0432371	0.0124815
11.3714	125.896	169.459	173.394	117.951	137.129	102.652	135.498	147.767	135.241	125.431	267.328	128.903		11.3714	110.896	154.459	158.394	102.951	122.129	87.652	120.498	132.767	120.241	110.431	252.328	113.903		11.3714	0.677338	0.728292	0.752937	0.674263	0.684417	0.630583	0.654209	0.640067	0.718345	0.689393	0.788623	0.711422	0.695824	0.0464694	0.0134146
11.3926	124.829	168.595	179.887	123.085	134.114	107.469	137.768	148.078	132.107	126.256	266.674	127.351		11.3926	109.829	153.595	164.887	108.085	119.114	92.469	122.768	133.078	117.107	111.256	251.674	112.351		11.3926	0.670821	0.724219	0.783802	0.707888	0.66752	0.665237	0.666533	0.641566	0.699622	0.694543	0.786579	0.701729	0.700838	0.0455684	0.0131545
11.4138	124.87	165.191	174.238	117.494	133.247	107.89	135.6	148.854	136.242	123.202	260.998	132.702		11.4138	109.87	150.191	159.238	102.494	118.247	92.89	120.6	133.854	121.242	108.202	245.998	117.702		11.4138	0.671072	0.708168	0.756949	0.67127	0.662662	0.668266	0.654763	0.645307	0.724326	0.675478	0.768839	0.73515	0.695187	0.041888	0.012092
11.435	120.124	165.036	171.174	116.949	134.039	106.773	133.864	149.225	132.488	125.687	260.188	128.549		11.435	105.124	150.036	156.174	101.949	119.039	91.773	118.864	134.225	117.488	110.687	245.188	113.549		11.435	0.642084	0.707437	0.742384	0.667701	0.6671	0.66023	0.645337	0.647096	0.701898	0.690991	0.766307	0.709211	0.687315	0.0396983	0.0114599
11.4562	119.254	167.212	176.078	118.315	134.215	107.094	130.548	149.063	133.017	123.432	262.11	129.288		11.4562	104.254	152.212	161.078	103.315	119.215	92.094	115.548	134.063	118.017	108.432	247.11	114.288		11.4562	0.63677	0.717698	0.765696	0.676647	0.668086	0.662539	0.627334	0.646315	0.705059	0.676914	0.772314	0.713827	0.6891	0.0470108	0.0135708
11.4774	125.834	170.648	172.283	121.521	136.437	109.948	131.289	146.881	135.186	120.487	262.729	128.386		11.4774	110.834	155.648	157.283	106.521	121.437	94.948	116.289	131.881	120.186	105.487	247.729	113.386		11.4774	0.67696	0.733899	0.747656	0.697644	0.680539	0.683072	0.631357	0.635795	0.718017	0.658529	0.774249	0.708193	0.695492	0.0435229	0.012564
11.4987	123.462	169.272	173.319	119.597	132.115	108.03	134.549	150.8	134.147	120.925	258.948	129.434		11.4987	108.462	154.272	158.319	104.597	117.115	93.03	119.549	135.8	119.147	105.925	243.948	114.434		11.4987	0.662472	0.727411	0.752581	0.685043	0.656318	0.669273	0.649056	0.654689	0.71181	0.661263	0.762432	0.714739	0.692257	0.0400957	0.0115746
11.5199	125.764	169.09	179.618	117.175	136.912	106.089	133.193	147.15	132.207	123.254	266.868	130.949		11.5199	110.764	154.09	164.618	102.175	121.912	91.089	118.193	132.15	117.207	108.254	251.868	115.949		11.5199	0.676532	0.726553	0.782524	0.669181	0.683201	0.655309	0.641694	0.637092	0.70022	0.675803	0.787185	0.724201	0.696625	0.0498068	0.014378
11.5411	123.569	168.02	175.186	117.096	133.03	110.783	130.01	145.75	132.721	124.215	263.055	130.409		11.5411	108.569	153.02	160.186	102.096	118.03	95.783	115.01	130.75	117.721	109.215	248.055	115.409		11.5411	0.663125	0.721507	0.761456	0.668664	0.661446	0.689079	0.624413	0.630343	0.70329	0.681802	0.775268	0.720829	0.691768	0.0470785	0.0135904
11.5623	120.757	169.072	179.458	115.706	134.934	109.809	132.918	145.92	132.486	118.474	264.282	127.578		11.5623	105.757	154.072	164.458	100.706	119.934	94.809	117.918	130.92	117.486	103.474	249.282	112.578		11.5623	0.64595	0.726468	0.781763	0.65956	0.672116	0.682072	0.640201	0.631162	0.701887	0.645962	0.779103	0.703147	0.689116	0.0514562	0.0148541
11.5835	120.462	166.517	179.146	121.268	137.64	107.85	134.98	146.113	131.793	119.357	267.042	126.91		11.5835	105.462	151.517	164.146	106.268	122.64	92.85	119.98	131.113	116.793	104.357	252.042	111.91		11.5835	0.644148	0.714421	0.78028	0.695987	0.68728	0.667978	0.651396	0.632093	0.697746	0.651475	0.787729	0.698974	0.692459	0.0498397	0.0143875
11.6047	119.963	165.071	179.097	119.241	134.806	109.515	131.663	146.762	128.634	124.433	265.912	126.806		11.6047	104.963	150.071	164.097	104.241	119.806	94.515	116.663	131.762	113.634	109.433	250.912	111.806		11.6047	0.6411	0.707602	0.780047	0.682712	0.671398	0.679956	0.633388	0.635222	0.678874	0.683163	0.784197	0.698325	0.689665	0.0491997	0.0142027
11.626	121.313	167.342	178.76	120.358	137.438	108.565	130.725	149.062	129.23	120.197	263.959	132.324		11.626	106.313	152.342	163.76	105.358	122.438	93.565	115.725	134.062	114.23	105.197	248.959	117.324		11.626	0.649346	0.718311	0.778445	0.690028	0.686148	0.673122	0.628295	0.64631	0.682434	0.656719	0.778093	0.73279	0.693337	0.0494657	0.0142795
11.6472	122.977	168.065	176.941	121.665	136.442	109.451	134.023	147.757	130.841	123.364	265.436	127.328		11.6472	107.977	153.065	161.941	106.665	121.442	94.451	119.023	132.757	115.841	108.364	250.436	112.328		11.6472	0.659509	0.72172	0.769798	0.698588	0.680567	0.679496	0.646201	0.640018	0.692059	0.676489	0.782709	0.701585	0.695728	0.0442261	0.012767
11.6684	120.883	165.405	177.758	119.736	134.251	108.603	136.011	146.219	127.507	120.743	268.941	128.069		11.6684	105.883	150.405	162.758	104.736	119.251	93.603	121.011	131.219	112.507	105.743	253.941	113.069		11.6684	0.646719	0.709177	0.773682	0.685954	0.668288	0.673395	0.656994	0.632604	0.672141	0.660127	0.793664	0.706213	0.689913	0.0491853	0.0141986
11.6896	125.083	168.301	175.759	120.71	133.633	105.858	133.844	146.675	133.042	124.535	261.982	129.292		11.6896	110.083	153.301	160.759	105.71	118.633	90.858	118.844	131.675	118.042	109.535	246.982	114.292		11.6896	0.672373	0.722832	0.764179	0.692333	0.664825	0.653647	0.645229	0.634802	0.705208	0.6838	0.771914	0.713852	0.69375	0.0439868	0.0126979
11.7108	122.787	166.562	168.384	123.071	135.315	108.667	135.925	147.115	131.881	121.457	259.808	129.38		11.7108	107.787	151.562	153.384	108.071	120.315	93.667	120.925	132.115	116.881	106.457	244.808	114.38		11.7108	0.658349	0.714633	0.729122	0.707796	0.674251	0.673856	0.656527	0.636923	0.698272	0.664585	0.76512	0.714402	0.691153	0.0367286	0.0106026
11.732	122.315	168.225	174.512	126.205	132.91	112.838	136.18	150.609	129.842	122.809	264.405	127.727		11.732	107.315	153.225	159.512	111.205	117.91	97.838	121.18	135.609	114.842	107.809	249.405	112.727		11.732	0.655466	0.722474	0.758252	0.728322	0.660773	0.703863	0.657911	0.653768	0.686091	0.673025	0.779487	0.704077	0.698626	0.0419736	0.0121167
11.7532	121.339	166.583	179.413	123.381	136.599	108.596	134.221	144.88	131.273	123.89	255.015	130.79		11.7532	106.339	151.583	164.413	108.381	121.599	93.596	119.221	129.88	116.273	108.89	240.015	115.79		11.7532	0.649505	0.714732	0.781549	0.709826	0.681446	0.673345	0.647276	0.626149	0.69464	0.679773	0.75014	0.723208	0.694299	0.0446224	0.0128814
11.7745	121.503	166.262	181.671	121.051	134.818	107.103	131.399	151.671	130.521	123.6	260.537	129.627		11.7745	106.503	151.262	166.671	106.051	119.818	92.103	116.399	136.671	115.521	108.6	245.537	114.627		11.7745	0.650506	0.713218	0.792283	0.694566	0.671466	0.662604	0.631954	0.658888	0.690147	0.677963	0.767398	0.715944	0.693911	0.0473264	0.0136619
11.7957	124.822	170.285	176.005	120.723	134.601	109.267	132.058	148.33	133.916	124.132	258.791	128.476		11.7957	109.822	155.285	161.005	105.723	119.601	94.267	117.058	133.33	118.916	109.132	243.791	113.476		11.7957	0.670778	0.732187	0.765349	0.692418	0.67025	0.678172	0.635532	0.642781	0.71043	0.681284	0.761941	0.708755	0.695823	0.0417488	0.0120519
11.8169	122.449	170.259	170.786	122.282	133.782	107.703	136.37	147.341	133.009	126.919	260.998	133.203		11.8169	107.449	155.259	155.786	107.282	118.782	92.703	121.37	132.341	118.009	111.919	245.998	118.203		11.8169	0.656284	0.732064	0.74054	0.702629	0.66566	0.666921	0.658943	0.638013	0.705011	0.698682	0.768839	0.73828	0.697655	0.0410722	0.0118565
11.8381	122.958	169.549	176.808	123.914	136.814	109.633	130.843	148.797	132.895	120.935	262.314	130.69		11.8381	107.958	154.549	161.808	108.914	121.814	94.633	115.843	133.797	117.895	105.935	247.314	115.69		11.8381	0.659393	0.728717	0.769166	0.713317	0.682651	0.680805	0.628936	0.645032	0.70433	0.661326	0.772952	0.722584	0.697434	0.046165	0.0133267
11.8593	122.652	170.178	177.402	120.271	136.397	111.774	133.142	152.205	134.702	124.573	262.548	128.833		11.8593	107.652	155.178	162.402	105.271	121.397	96.774	118.142	137.205	119.702	109.573	247.548	113.833		11.8593	0.657524	0.731683	0.77199	0.689458	0.680314	0.696208	0.641418	0.661462	0.715125	0.684037	0.773683	0.710985	0.701157	0.0420368	0.012135
11.8805	119.66	166.237	172.031	122.789	135.455	108.76	134.968	148.816	133.96	126.478	265.308	132.414		11.8805	104.66	151.237	157.031	107.789	120.455	93.76	119.968	133.816	118.96	111.478	250.308	117.414		11.8805	0.63925	0.7131	0.746458	0.705949	0.675035	0.674525	0.651331	0.645124	0.710693	0.695929	0.782309	0.733352	0.697755	0.0433441	0.0125124
11.9018	121.671	167.394	175.156	123.428	140.915	108.558	131.946	146.813	134.879	127.293	260.879	125.266		11.9018	106.671	152.394	160.156	108.428	125.915	93.558	116.946	131.813	119.879	112.293	245.879	110.266		11.9018	0.651532	0.718556	0.761313	0.710134	0.705634	0.673072	0.634924	0.635467	0.716183	0.701017	0.768467	0.688706	0.697084	0.0433671	0.012519
11.923	123.108	167.65	176.767	120.677	137.913	108.372	136.58	148.437	131.604	124.837	263.641	130.14		11.923	108.108	152.65	161.767	105.677	122.913	93.372	121.58	133.437	116.604	109.837	248.641	115.14		11.923	0.660309	0.719763	0.768971	0.692117	0.68881	0.671734	0.660083	0.643297	0.696617	0.685685	0.777099	0.719149	0.698636	0.0415855	0.0120047
11.9442	121.132	171.26	177.233	120.356	132.219	105.681	130.636	145.307	135.244	122.876	261.713	135.041		11.9442	106.132	156.26	162.233	105.356	117.219	90.681	115.636	130.307	120.244	107.876	246.713	120.041		11.9442	0.64824	0.736784	0.771186	0.690014	0.656901	0.652374	0.627812	0.628207	0.718363	0.673443	0.771074	0.74976	0.69368	0.0537512	0.0155166
11.9654	119.467	166.028	178.835	120.55	137.222	107.42	131.401	150.114	134.72	122.957	267.906	133.37		11.9654	104.467	151.028	163.835	105.55	122.222	92.42	116.401	135.114	119.72	107.957	252.906	118.37		11.9654	0.638071	0.712115	0.778801	0.691285	0.684938	0.664885	0.631965	0.651382	0.715233	0.673949	0.790429	0.739323	0.697698	0.0516024	0.0148963
11.9866	122.021	170.48	176.042	121.082	136.32	105.335	130.538	148.128	129.09	122.854	261.12	132.039		11.9866	107.021	155.48	161.042	106.082	121.32	90.335	115.538	133.128	114.09	107.854	246.12	117.039		11.9866	0.65367	0.733107	0.765525	0.694769	0.679883	0.649885	0.62728	0.641807	0.681598	0.673306	0.76922	0.731009	0.691755	0.047809	0.0138013
12.0078	122.521	165.326	177.301	120.111	135.155	108.269	132.792	148.269	134.979	122.997	261.885	130.057		12.0078	107.521	150.326	162.301	105.111	120.155	93.269	117.792	133.269	119.979	107.997	246.885	115.057		12.0078	0.656724	0.708805	0.77151	0.68841	0.673354	0.670993	0.639517	0.642487	0.71678	0.674198	0.771611	0.71863	0.694418	0.0444811	0.0128406
12.0291	121.477	168.843	178.212	117.245	134.226	105.368	135.433	149.408	133.837	122.826	264.593	128.954		12.0291	106.477	153.843	163.212	102.245	119.226	90.368	120.433	134.408	118.837	107.826	249.593	113.954		12.0291	0.650348	0.725388	0.77584	0.669639	0.668148	0.650122	0.653856	0.647978	0.709958	0.673131	0.780075	0.711741	0.693019	0.0475847	0.0137365
12.0503	122.277	172.138	174.663	119.011	135.161	110.498	132.699	147.241	133.114	120.445	267.713	128.09		12.0503	107.277	157.138	159.663	104.011	120.161	95.498	117.699	132.241	118.114	105.445	252.713	113.09		12.0503	0.655234	0.740924	0.75897	0.681206	0.673388	0.687028	0.639012	0.637531	0.705638	0.658267	0.789826	0.706345	0.694447	0.0481666	0.0139045
12.0715	119.335	166.411	170.487	117.801	137.062	107.087	133.22	146.636	135.069	123.718	257.606	127.009		12.0715	104.335	151.411	155.487	102.801	122.062	92.087	118.22	131.636	120.069	108.718	242.606	112.009		12.0715	0.637264	0.713921	0.739119	0.673281	0.684041	0.662489	0.641841	0.634614	0.717318	0.678699	0.758238	0.699593	0.686701	0.0401321	0.0115851
12.0927	119.078	163.239	181.046	119.288	136.763	111.56	134.683	151.187	135.966	123.313	265.093	129.696		12.0927	104.078	148.239	166.046	104.288	121.763	96.56	119.683	136.187	120.966	108.313	250.093	114.696		12.0927	0.635695	0.698964	0.789312	0.68302	0.682366	0.694669	0.649784	0.656554	0.722677	0.676171	0.781637	0.716375	0.698935	0.0478169	0.0138035
12.1139	120.375	168.286	176.667	121.768	135.976	108.025	131.811	146.895	133.323	122.349	267.483	129.019		12.1139	105.375	153.286	161.667	106.768	120.976	93.025	116.811	131.895	118.323	107.349	252.483	114.019		12.1139	0.643617	0.722762	0.768496	0.699262	0.677955	0.669237	0.634191	0.635863	0.706887	0.670153	0.789107	0.712147	0.69414	0.049433	0.0142701
12.1351	121.607	167.898	173.414	122.046	135.994	105.183	133.887	145.976	134.95	126.794	265.944	127.21		12.1351	106.607	152.898	158.414	107.046	120.994	90.183	118.887	130.976	119.95	111.794	250.944	112.21		12.1351	0.651142	0.720932	0.753032	0.701083	0.678056	0.648791	0.645462	0.631432	0.716607	0.697902	0.784297	0.700848	0.694132	0.0461149	0.0133122
12.1564	121.937	166.11	176.767	120.595	138.904	111.08	129.216	150.038	136.796	121.224	269.071	128.056		12.1564	106.937	151.11	161.767	105.595	123.904	96.08	114.216	135.038	121.796	106.224	254.071	113.056		12.1564	0.653157	0.712501	0.768971	0.69158	0.694364	0.691215	0.620102	0.651015	0.727635	0.66313	0.79407	0.706132	0.697823	0.049565	0.0143082
12.1776	121.104	168.194	175.347	123.601	137.185	108.389	133.364	150.671	135.422	125.383	261.48	132.418		12.1776	106.104	153.194	160.347	108.601	122.185	93.389	118.364	135.671	120.422	110.383	246.48	117.418		12.1776	0.648069	0.722328	0.762221	0.711267	0.68473	0.671856	0.642623	0.654067	0.719427	0.689094	0.770345	0.733377	0.700784	0.0428236	0.0123621
12.1988	126.401	169.262	179.882	120.013	135.643	108.155	134.647	149.005	132.291	124.551	263.878	132.636		12.1988	111.401	154.262	164.882	105.013	120.643	93.155	119.647	134.005	117.291	109.551	248.878	117.636		12.1988	0.680423	0.727364	0.783778	0.687768	0.676089	0.670172	0.649588	0.646035	0.700722	0.6839	0.77784	0.734738	0.701535	0.04544	0.0131174
12.22	124.6	166.238	176.322	121.765	137.143	106.825	132.957	149.033	134.164	122.765	260.56	128.585		12.22	109.6	151.238	161.322	106.765	122.143	91.825	117.957	134.033	119.164	107.765	245.56	113.585		12.22	0.669422	0.713105	0.766856	0.699243	0.684495	0.660604	0.640413	0.64617	0.711911	0.67275	0.76747	0.709436	0.695156	0.0416281	0.012017
12.2412	124.497	165.398	176.188	119.86	136.14	109.32	132.858	149.544	134.345	125.427	270.147	129.623		12.2412	109.497	150.398	161.188	104.86	121.14	94.32	117.858	134.544	119.345	110.427	255.147	114.623		12.2412	0.668793	0.709144	0.766219	0.686766	0.678874	0.678554	0.639876	0.648634	0.712993	0.689368	0.797433	0.715919	0.699381	0.0455283	0.0131429
12.2624	125.172	169.041	179.794	121.384	135.696	110.798	134.483	147.709	132.698	124.357	266.089	129.03		12.2624	110.172	154.041	164.794	106.384	120.696	95.798	119.483	132.709	117.698	109.357	251.089	114.03		12.2624	0.672916	0.726321	0.78336	0.696747	0.676386	0.689187	0.648698	0.639787	0.703153	0.682688	0.78475	0.712216	0.701351	0.0456642	0.0131821
12.2836	121.861	164.257	177.545	121.461	133.358	110.583	128.583	145.996	137.993	125.985	270.01	127.865		12.2836	106.861	149.257	162.545	106.461	118.358	95.583	113.583	130.996	122.993	110.985	255.01	112.865		12.2836	0.652693	0.703764	0.772669	0.697251	0.663284	0.68764	0.616666	0.631529	0.734787	0.692852	0.797005	0.704939	0.696257	0.053259	0.0153745
12.3049	121.931	168.069	177.867	118.211	135.652	108.272	134.982	147.141	136.918	125.635	264.807	127.186		12.3049	106.931	153.069	162.867	103.211	120.652	93.272	119.982	132.141	121.918	110.635	249.807	112.186		12.3049	0.653121	0.721738	0.7742	0.675966	0.676139	0.671014	0.651407	0.637049	0.728364	0.690667	0.780744	0.700698	0.696759	0.0464883	0.01342
12.3261	122.874	169.828	173.983	120.197	137.131	108.234	130.06	147.413	134.146	124.43	267.72	127.387		12.3261	107.874	154.828	158.983	105.197	122.131	93.234	115.06	132.413	119.146	109.43	252.72	112.387		12.3261	0.65888	0.730032	0.755737	0.688973	0.684428	0.670741	0.624685	0.63836	0.711804	0.683144	0.789848	0.701954	0.694882	0.0472681	0.0136451
12.3473	124.521	169.804	176.404	116.933	133.577	110.665	131.8	148.969	131.997	124.065	266.645	126.216		12.3473	109.521	154.804	161.404	101.933	118.577	95.665	116.8	133.969	116.997	109.065	251.645	111.216		12.3473	0.66894	0.729919	0.767246	0.667596	0.664511	0.68823	0.634132	0.645861	0.698965	0.680866	0.786488	0.69464	0.693949	0.0462565	0.0133531
12.3685	123.285	166.7	171.686	118.312	133.695	108.406	131.995	148.759	133.5	125.269	261.391	127.765		12.3685	108.285	151.7	156.686	103.312	118.695	93.406	116.995	133.759	118.5	110.269	246.391	112.765		12.3685	0.661391	0.715283	0.744818	0.676628	0.665172	0.671978	0.63519	0.644849	0.707944	0.688382	0.770067	0.704315	0.690501	0.0399577	0.0115348
12.3897	123.96	167.665	170.372	119.464	134.966	110.206	133.066	147.81	133.455	122.182	265.962	126.998		12.3897	108.96	152.665	155.372	104.464	119.966	95.206	118.066	132.81	118.455	107.182	250.962	111.998		12.3897	0.665513	0.719833	0.738572	0.684172	0.672295	0.684928	0.641005	0.640274	0.707676	0.66911	0.784353	0.699524	0.692271	0.0413141	0.0119263
12.4109	123.139	168.768	171.382	119.76	140.045	109.616	132.541	149.648	133.386	121.083	264.513	125.475		12.4109	108.139	153.768	156.382	104.76	125.045	94.616	117.541	134.648	118.386	106.083	249.513	110.475		12.4109	0.660499	0.725034	0.743373	0.686111	0.700758	0.680683	0.638155	0.649135	0.707263	0.66225	0.779825	0.690012	0.693591	0.0410142	0.0118398
12.4322	125.714	167.245	173.723	117.093	136.331	109.447	131.69	145.717	133.056	120.164	257.238	125.988		12.4322	110.714	152.245	158.723	102.093	121.331	94.447	116.69	130.717	118.056	105.164	242.238	110.988		12.4322	0.676227	0.717853	0.754501	0.668644	0.679945	0.679467	0.633534	0.630184	0.705292	0.656513	0.757088	0.693216	0.687705	0.0408584	0.0117948
12.4534	120.453	168.693	174.822	112.063	139.532	110.839	131.433	145.745	133.076	122.081	260.889	126.92		12.4534	105.453	153.693	159.822	97.063	124.532	95.839	116.433	130.745	118.076	107.081	245.889	111.92		12.4534	0.644093	0.724681	0.759725	0.635701	0.697883	0.689482	0.632139	0.630319	0.705411	0.66848	0.768498	0.699037	0.687954	0.0476602	0.0137583
12.4746	122.779	170.544	175.667	116.404	139.511	108.389	134.749	146.396	134.289	122.833	261.725	124.957		12.4746	107.779	155.544	160.667	101.404	124.511	93.389	119.749	131.396	119.289	107.833	246.725	109.957		12.4746	0.6583	0.733408	0.763742	0.664131	0.697765	0.671856	0.650142	0.633457	0.712658	0.673175	0.771111	0.686776	0.693044	0.0441549	0.0127464
12.4958	125.112	168.182	174.174	118.557	138.75	109.943	133.561	150.798	134.317	123.717	258.393	131.364		12.4958	110.112	153.182	159.174	103.557	123.75	94.943	118.561	135.798	119.317	108.717	243.393	116.364		12.4958	0.67255	0.722271	0.756645	0.678232	0.693501	0.683036	0.643692	0.654679	0.712825	0.678693	0.760697	0.726793	0.698635	0.0375194	0.0108309
12.517	123.788	169.9	175.134	117.158	135.093	108.338	129.558	146.981	133.84	121.824	268.257	127.448		12.517	108.788	154.9	160.134	102.158	120.093	93.338	114.558	131.981	118.84	106.824	253.257	112.448		12.517	0.664463	0.730372	0.761209	0.66907	0.673007	0.671489	0.621959	0.636277	0.709976	0.666876	0.791526	0.702335	0.691546	0.0498202	0.0143819
12.5382	124.04	166.016	169.12	116.358	136.87	106.44	133.701	147.124	135.767	123.779	260.822	126.096		12.5382	109.04	151.016	154.12	101.358	121.87	91.44	118.701	132.124	120.767	108.779	245.822	111.096		12.5382	0.666002	0.712058	0.732621	0.66383	0.682965	0.657834	0.644452	0.636967	0.721488	0.67908	0.768289	0.69389	0.68829	0.0390279	0.0112664
12.5595	125.129	168.818	173.821	118.502	134.389	107.309	133.859	147.666	134.233	124.763	261.895	125.963		12.5595	110.129	153.818	158.821	103.502	119.389	92.309	118.859	132.666	119.233	109.763	246.895	110.963		12.5595	0.672653	0.72527	0.754967	0.677872	0.669062	0.664086	0.64531	0.63958	0.712323	0.685223	0.771642	0.69306	0.692587	0.0412064	0.0118953
12.5807	123.937	165.867	177.078	118.273	139.803	109.352	131.379	149.768	131.801	125.049	265.275	122.813		12.5807	108.937	150.867	162.078	103.273	124.803	94.352	116.379	134.768	116.801	110.049	250.275	107.813		12.5807	0.665373	0.711356	0.770449	0.676372	0.699402	0.678784	0.631846	0.649713	0.697794	0.687008	0.782206	0.673385	0.693641	0.0443418	0.0128004
12.6019	122.743	160.817	178.572	121.075	136.631	106.628	130.998	147.818	135.217	126.695	261.205	128.948		12.6019	107.743	145.817	163.572	106.075	121.631	91.628	115.998	132.818	120.217	111.695	246.205	113.948		12.6019	0.65808	0.687544	0.777551	0.694723	0.681626	0.659187	0.629777	0.640313	0.718202	0.697284	0.769486	0.711703	0.69379	0.0460166	0.0132838
12.6231	124.215	166.749	181.011	118.524	138.851	106.523	127.2	148.218	133.528	125.82	266.419	130.563		12.6231	109.215	151.749	166.011	103.524	123.851	91.523	112.2	133.218	118.528	110.82	251.419	115.563		12.6231	0.667071	0.715514	0.789145	0.678016	0.694067	0.658432	0.609157	0.642241	0.708112	0.691822	0.785782	0.721791	0.696762	0.0530412	0.0153117
12.6443	123.229	167.255	176.378	119.442	140.537	108.002	130.486	148.719	133.462	125.893	255.995	127.074		12.6443	108.229	152.255	161.378	104.442	125.537	93.002	115.486	133.719	118.462	110.893	240.995	112.074		12.6443	0.661049	0.7179	0.767122	0.684028	0.703515	0.669072	0.626998	0.644656	0.707717	0.692277	0.753203	0.699999	0.693961	0.0409783	0.0118294
12.6655	123.966	162.649	178.092	117.006	133.396	111.149	134.631	148.234	131.518	125.477	257.904	128.747		12.6655	108.966	147.649	163.092	102.006	118.396	96.149	119.631	133.234	116.518	110.477	242.904	113.747		12.6655	0.66555	0.696182	0.77527	0.668074	0.663497	0.691712	0.649502	0.642318	0.696103	0.68968	0.759169	0.710448	0.692292	0.0406577	0.0117369
12.6868	122.287	166.287	175.044	114.314	134.524	109.101	131.429	150.413	134.12	123.938	260.842	127.228		12.6868	107.287	151.287	160.044	99.314	119.524	94.101	116.429	135.413	119.12	108.938	245.842	112.228		12.6868	0.655295	0.713336	0.760781	0.650443	0.669818	0.676978	0.632117	0.652823	0.711648	0.680073	0.768351	0.700961	0.689385	0.0431223	0.0124483
12.708	120.439	165.492	177.155	114.04	133.957	112.93	134.107	147.854	132.193	123.512	257.106	129.71		12.708	105.439	150.492	162.155	99.04	118.957	97.93	119.107	132.854	117.193	108.512	242.106	114.71		12.708	0.644008	0.709588	0.770815	0.648649	0.666641	0.704525	0.646657	0.640486	0.700136	0.677413	0.756675	0.716463	0.690171	0.0439355	0.0126831
12.7292	122.997	170.757	178.829	116.064	133.296	109.902	134.796	151.434	132.64	125.933	259.534	128.502		12.7292	107.997	155.757	163.829	101.064	118.296	94.902	119.796	136.434	117.64	110.933	244.534	113.502		12.7292	0.659632	0.734413	0.778773	0.661905	0.662936	0.682741	0.650397	0.657745	0.702807	0.692527	0.764263	0.708918	0.696421	0.0431774	0.0124642
12.7504	120.893	169.385	180.025	116.11	132.03	109.806	131.719	148.275	131.833	126.189	258.901	130.413		12.7504	105.893	154.385	165.025	101.11	117.03	94.806	116.719	133.275	116.833	111.189	243.901	115.413		12.7504	0.646781	0.727943	0.784458	0.662206	0.655842	0.68205	0.633692	0.642516	0.697985	0.694125	0.762285	0.720854	0.692561	0.0484646	0.0139905
12.7716	120.361	169.954	176.362	116.64	129.997	108.777	134.156	149.925	132.125	125.081	258.817	132.55		12.7716	105.361	154.954	161.362	101.64	114.997	93.777	119.156	134.925	117.125	110.081	243.817	117.55		12.7716	0.643531	0.730626	0.767046	0.665677	0.644449	0.674647	0.646923	0.65047	0.69973	0.687208	0.762022	0.734201	0.692211	0.0459755	0.013272
12.7928	123.463	170.398	178.504	117.3	133.859	108.622	133.151	152.655	132.636	121.459	258.27	129.07		12.7928	108.463	155.398	163.504	102.3	118.859	93.622	118.151	137.655	117.636	106.459	243.27	114.07		12.7928	0.662478	0.73272	0.777228	0.67	0.666091	0.673532	0.641466	0.663632	0.702783	0.664597	0.760313	0.712465	0.693942	0.0432284	0.012479
12.814	122.162	169.322	174.587	118.089	136.546	108.212	134.3	151.461	132.545	122.152	259.387	131.704		12.814	107.162	154.322	159.587	103.089	121.546	93.212	119.3	136.461	117.545	107.152	244.387	116.704		12.814	0.654531	0.727646	0.758608	0.675167	0.681149	0.670582	0.647705	0.657875	0.702239	0.668923	0.763804	0.728917	0.694762	0.0406337	0.0117299
12.8353	120.387	168.535	171.419	117.898	132.657	107.782	132.01	144.262	132.315	126.988	260.727	128.127		12.8353	105.387	153.535	156.419	102.898	117.657	92.782	117.01	129.262	117.315	111.988	245.727	113.127		12.8353	0.64369	0.723936	0.743549	0.673916	0.659355	0.667489	0.635272	0.623169	0.700865	0.699113	0.767992	0.706576	0.687077	0.0445032	0.012847
12.8565	124.618	166.915	175.518	115.565	130.601	108.143	133.149	149.509	133.8	125.591	257.733	128.466		12.8565	109.618	151.915	160.518	100.565	115.601	93.143	118.149	134.509	118.8	110.591	242.733	113.466		12.8565	0.669532	0.716297	0.763034	0.658636	0.647833	0.670086	0.641456	0.648465	0.709737	0.690392	0.758635	0.708693	0.690233	0.0417063	0.0120396
12.8777	119.532	170.804	169.558	116.495	136.725	106.297	132.865	143.548	136.173	125.637	265.637	132.301		12.8777	104.532	155.804	154.558	101.495	121.725	91.297	117.865	128.548	121.173	110.637	250.637	117.301		12.8777	0.638468	0.734634	0.734703	0.664727	0.682153	0.656806	0.639914	0.619727	0.723913	0.690679	0.783338	0.732646	0.691809	0.0500337	0.0144435
12.8989	119.097	171.815	179.134	121.04	130.972	105.118	134.314	152.201	134.117	125.28	271.505	129.366		12.8989	104.097	156.815	164.134	106.04	115.972	90.118	119.314	137.201	119.117	110.28	256.505	114.366		12.8989	0.635811	0.739401	0.780223	0.694494	0.649912	0.648324	0.647781	0.661443	0.71163	0.688451	0.801677	0.714314	0.697788	0.0541753	0.0156391
12.9201	119.241	166.301	168.69	119.225	133.511	105.218	132.025	152.156	137.877	123.136	263.707	129.624		12.9201	104.241	151.301	153.69	104.225	118.511	90.218	117.025	137.156	122.877	108.136	248.707	114.624		12.9201	0.63669	0.713402	0.730576	0.682607	0.664141	0.649043	0.635353	0.661226	0.734094	0.675066	0.777306	0.715926	0.689619	0.0444266	0.0128249
12.9413	118.291	169.18	176.606	121.859	132.319	106.373	133.431	149.737	131.596	122.39	267.337	130.763		12.9413	103.291	154.18	161.606	106.859	117.319	91.373	118.431	134.737	116.596	107.39	252.337	115.763		12.9413	0.630888	0.726977	0.768206	0.699858	0.657461	0.657352	0.642987	0.649564	0.696569	0.670409	0.788651	0.72304	0.692663	0.0506416	0.014619
12.9626	120.551	167.393	176.934	120.438	132.27	105.328	135.066	147.929	134.993	122.267	266.749	128.387		12.9626	105.551	152.393	161.934	105.438	117.27	90.328	120.066	132.929	119.993	107.267	251.749	113.387		12.9626	0.644692	0.718551	0.769765	0.690551	0.657187	0.649835	0.651863	0.640848	0.716864	0.669641	0.786813	0.7082	0.692067	0.0491565	0.0141903
12.9838	119.458	166.768	177.281	118.563	134.35	106.536	133.038	148.979	135.638	123.046	268.492	132.785		12.9838	104.458	151.768	162.281	103.563	119.35	91.536	118.038	133.979	120.638	108.046	253.492	117.785		12.9838	0.638016	0.715604	0.771414	0.678271	0.668843	0.658525	0.640853	0.64591	0.720717	0.674504	0.792261	0.735669	0.695049	0.0516475	0.0149094
13.005	121.211	170.472	174.153	118.141	132.645	106.594	131.011	147.653	134.437	124.682	268.952	131.203		13.005	106.211	155.472	159.153	103.141	117.645	91.594	116.011	132.653	119.437	109.682	253.952	116.203		13.005	0.648723	0.733069	0.756545	0.675508	0.659288	0.658942	0.629848	0.639517	0.713542	0.684717	0.793698	0.725788	0.693265	0.0511326	0.0147607
13.0262	121.927	170.719	176.752	116.312	131.22	107.063	130.894	147.783	130.56	125.678	263.003	131.763		13.0262	106.927	155.719	161.752	101.312	116.22	92.063	115.894	132.783	115.56	110.678	248.003	116.763		13.0262	0.653096	0.734233	0.7689	0.663529	0.651302	0.662316	0.629213	0.640144	0.69038	0.690935	0.775105	0.729286	0.690703	0.0499731	0.014426
13.0474	120.39	169.867	178.561	120.005	135.002	105.413	131.85	147.991	136.473	122.209	260.5	128.865		13.0474	105.39	154.867	163.561	105.005	120.002	90.413	116.85	132.991	121.473	107.209	245.5	113.865		13.0474	0.643708	0.730216	0.777499	0.687716	0.672497	0.650446	0.634403	0.641147	0.725706	0.669279	0.767283	0.711185	0.69259	0.0493736	0.0142529
13.0686	118.612	169.71	168.145	116.226	133.855	104.562	133.459	149.752	134.374	124.449	263.961	130.697		13.0686	103.612	154.71	153.145	101.226	118.855	89.562	118.459	134.752	119.374	109.449	248.961	115.697		13.0686	0.632849	0.729476	0.727986	0.662966	0.666069	0.644324	0.643139	0.649636	0.713166	0.683263	0.778099	0.722628	0.6878	0.0455598	0.013152
13.0899	120.868	166.18	178.047	116.734	132.86	107.333	131.094	147.502	134.532	123.257	262.671	126.683		13.0899	105.868	151.18	163.047	101.734	117.86	92.333	116.094	132.502	119.532	108.257	247.671	111.683		13.0899	0.646628	0.712832	0.775056	0.666293	0.660493	0.664259	0.630299	0.638789	0.71411	0.675821	0.774068	0.697557	0.688017	0.0484098	0.0139747
13.1111	119.885	168.473	174.551	115.902	131.306	109.231	133.378	145.207	133.348	122.912	267.867	132.139		13.1111	104.885	153.473	159.551	100.902	116.306	94.231	118.378	130.207	118.348	107.912	252.867	117.139		13.1111	0.640624	0.723643	0.758437	0.660844	0.651784	0.677913	0.642699	0.627725	0.707036	0.673668	0.790307	0.731634	0.690526	0.0514996	0.0148667
13.1323	121.985	165.655	178.571	121.11	135.094	108.523	132.482	149.601	135.557	124.182	272.728	131.666		13.1323	106.985	150.655	163.571	106.11	120.094	93.523	117.482	134.601	120.557	109.182	257.728	116.666		13.1323	0.65345	0.710356	0.777547	0.694953	0.673012	0.67282	0.637834	0.648908	0.720233	0.681596	0.8055	0.72868	0.700407	0.0513047	0.0148104
13.1535	119.657	171.28	176.093	117.092	132.303	109.4	129.619	149.541	136.16	127.429	265.306	129.391		13.1535	104.657	156.28	161.093	102.092	117.303	94.4	114.619	134.541	121.16	112.429	250.306	114.391		13.1535	0.639231	0.736879	0.765767	0.668637	0.657371	0.679129	0.62229	0.648619	0.723836	0.701866	0.782303	0.71447	0.695033	0.0509476	0.0147073
13.1747	119.456	168.765	172.97	117.345	134.951	109.582	132.907	148.729	133.626	122.503	263.562	130.115		13.1747	104.456	153.765	157.97	102.345	119.951	94.582	117.907	133.729	118.626	107.503	248.562	115.115		13.1747	0.638004	0.72502	0.750922	0.670294	0.672211	0.680438	0.640142	0.644704	0.708697	0.671114	0.776852	0.718992	0.691449	0.0447622	0.0129217
13.1959	119.724	170.322	177.279	118.567	135.373	109.117	131.507	149.37	136.477	127.945	262.669	127.417		13.1959	104.724	155.322	162.279	103.567	120.373	94.117	116.507	134.37	121.477	112.945	247.669	112.417		13.1959	0.63964	0.732362	0.771405	0.678298	0.674576	0.677093	0.632541	0.647795	0.72573	0.705087	0.774061	0.702141	0.696727	0.0474404	0.0136949
13.2172	121.948	173.797	174.381	120.084	135.931	109.658	131.811	153.194	135.226	123.985	262.472	129.484		13.2172	106.948	158.797	159.381	105.084	120.931	94.658	116.811	138.194	120.226	108.985	247.472	114.484		13.2172	0.653224	0.748747	0.757629	0.688233	0.677703	0.680985	0.634191	0.66623	0.718256	0.680366	0.773446	0.715051	0.699505	0.0433698	0.0125198
13.2384	120.46	169.106	172.682	116.021	133.13	110.901	132.735	146.785	133.133	123.335	265.459	129.206		13.2384	105.46	154.106	157.682	101.021	118.13	95.901	117.735	131.785	118.133	108.335	250.459	114.206		13.2384	0.644136	0.726628	0.749553	0.661623	0.662006	0.689928	0.639208	0.635332	0.705752	0.676308	0.782781	0.713315	0.690547	0.0464493	0.0134088
13.2596	119.559	170.646	178.035	116.673	137.002	109.982	133.001	150.461	133.768	121.687	264.852	129.486		13.2596	104.559	155.646	163.035	101.673	122.002	94.982	118.001	135.461	118.768	106.687	249.852	114.486		13.2596	0.638633	0.733889	0.774999	0.665893	0.683705	0.683316	0.640652	0.653054	0.709545	0.66602	0.780884	0.715064	0.695471	0.0483747	0.0139646
13.2808	122.089	170.594	171.596	117.178	139.278	112.006	130.896	147.854	134.684	122.343	265.835	130.312		13.2808	107.089	155.594	156.596	102.178	124.278	97.006	115.896	132.854	119.684	107.343	250.835	115.312		13.2808	0.654086	0.733644	0.74439	0.669201	0.69646	0.697877	0.629224	0.640486	0.715018	0.670116	0.783956	0.720223	0.696223	0.045858	0.0132381
13.302	119.178	167.713	174.898	117.925	136.52	111.226	132.3	146.039	132.708	122.937	265.523	131.731		13.302	104.178	152.713	159.898	102.925	121.52	96.226	117.3	131.039	117.708	107.937	250.523	116.731		13.302	0.636306	0.72006	0.760087	0.674093	0.681004	0.692266	0.636846	0.631736	0.703213	0.673824	0.782981	0.729086	0.693458	0.0483584	0.0139599
13.3232	117.708	167.386	170.114	118.243	137.187	112.293	132.839	150.348	133.045	122.423	265.477	125.344		13.3232	102.708	152.386	155.114	103.243	122.187	97.293	117.839	135.348	118.045	107.423	250.477	110.344		13.3232	0.627327	0.718518	0.737346	0.676176	0.684742	0.699942	0.639772	0.65251	0.705226	0.670615	0.782838	0.689193	0.69035	0.0431217	0.0124482
13.3444	120.162	165.22	173.49	115.553	131.713	111.114	131.952	150.359	129.482	123.229	267.499	129.037		13.3444	105.162	150.22	158.49	100.553	116.713	96.114	116.952	135.359	114.482	108.229	252.499	114.037		13.3444	0.642316	0.708305	0.753394	0.658558	0.654065	0.69146	0.634957	0.652563	0.68394	0.675647	0.789157	0.712259	0.688052	0.0465791	0.0134462
13.3657	117.897	169.792	173.814	118.842	135.633	108.42	132.525	147.321	132.155	121.153	261.635	126.3		13.3657	102.897	154.792	158.814	103.842	120.633	93.42	117.525	132.321	117.155	106.153	246.635	111.3		13.3657	0.628481	0.729863	0.754934	0.680099	0.676033	0.672079	0.638068	0.637917	0.699909	0.662687	0.77083	0.695164	0.687172	0.0456491	0.0131778
13.3869	120.495	166.735	178.818	116.116	134.795	108.396	132.815	147.476	132.499	119.386	265.191	127.278		13.3869	105.495	151.735	163.818	101.116	119.795	93.396	117.815	132.476	117.499	104.386	250.191	112.278		13.3869	0.64435	0.715448	0.778721	0.662245	0.671337	0.671906	0.639642	0.638664	0.701964	0.651656	0.781944	0.701273	0.688262	0.0498892	0.0144018
13.4081	120.653	166.583	178.817	117.408	136.917	109.346	131.371	149.899	130.85	119.082	260.704	130.573		13.4081	105.653	151.583	163.817	102.408	121.917	94.346	116.371	134.899	115.85	104.082	245.704	115.573		13.4081	0.645315	0.714732	0.778716	0.670707	0.683229	0.678741	0.631802	0.650345	0.692113	0.649758	0.76792	0.721853	0.690436	0.0473776	0.0136767
13.4293	121.754	167.098	172.429	121.374	137.001	107.783	128.64	149.316	130.398	124.975	261.544	128.687		13.4293	106.754	152.098	157.429	106.374	122.001	92.783	113.64	134.316	115.398	109.975	246.544	113.687		13.4293	0.652039	0.71716	0.74835	0.696682	0.683699	0.667496	0.616975	0.647534	0.689412	0.686546	0.770545	0.710073	0.690543	0.0428627	0.0123734
13.4505	116.333	165.881	175.115	117.346	137.533	110.981	134.037	144.878	134.221	124.336	261.143	129.314		13.4505	101.333	150.881	160.115	102.346	122.533	95.981	119.037	129.878	119.221	109.336	246.143	114.314		13.4505	0.618929	0.711422	0.761118	0.670301	0.686681	0.690503	0.646277	0.626139	0.712252	0.682557	0.769292	0.713989	0.690788	0.0470618	0.0135856
13.4717	120.235	166.051	170.307	117.545	139.694	104.705	131.112	150.238	132.766	124.543	268.543	126.412		13.4717	105.235	151.051	155.307	102.545	124.694	89.705	116.112	135.238	117.766	109.543	253.543	111.412		13.4717	0.642762	0.712223	0.738263	0.671604	0.698791	0.645353	0.630396	0.651979	0.703559	0.68385	0.79242	0.695864	0.688922	0.0459188	0.0132556
13.493	120.015	168.497	173.812	117.721	134.888	108.173	133.003	151.53	132.134	121.628	265.66	126.845		13.493	105.015	153.497	158.812	102.721	119.888	93.173	118.003	136.53	117.134	106.628	250.66	111.845		13.493	0.641418	0.723756	0.754924	0.672757	0.671858	0.670302	0.640663	0.658208	0.699784	0.665652	0.78341	0.698568	0.690108	0.0443759	0.0128102
13.5142	118.384	165.921	178.152	117.188	135.003	108.239	133.284	147.877	134.002	123.27	265.099	128.797		13.5142	103.384	150.921	163.152	102.188	120.003	93.239	118.284	132.877	119.002	108.27	250.099	113.797		13.5142	0.631456	0.71161	0.775555	0.669266	0.672502	0.670777	0.642188	0.640597	0.710943	0.675903	0.781656	0.71076	0.691101	0.0490833	0.0141691
13.5354	119.76	166.617	172.377	113.651	135.391	110.894	131.947	149.121	132.815	125.801	259.93	129.121		13.5354	104.76	151.617	157.377	98.651	120.391	95.894	116.947	134.121	117.815	110.801	244.93	114.121		13.5354	0.63986	0.714892	0.748103	0.646101	0.674677	0.689877	0.63493	0.646594	0.703852	0.691703	0.765501	0.712784	0.689073	0.0426319	0.0123068
13.5566	120.237	169.948	175.771	115.335	137.931	109.936	132.061	148.188	129.893	121.328	264.234	130.11		13.5566	105.237	154.948	160.771	100.335	122.931	94.936	117.061	133.188	114.893	106.328	249.234	115.11		13.5566	0.642774	0.730598	0.764237	0.65713	0.688911	0.682985	0.635549	0.642096	0.686395	0.663779	0.778953	0.718961	0.691031	0.0478817	0.0138223
13.5778	119.983	169.063	173.111	115.258	138.064	109.175	133.752	148.056	131.949	124.092	263.161	130.452		13.5778	104.983	154.063	158.111	100.258	123.064	94.175	118.752	133.056	116.949	109.092	248.161	115.452		13.5778	0.641222	0.726425	0.751592	0.656626	0.689656	0.67751	0.644729	0.64146	0.698678	0.681034	0.775599	0.721097	0.692136	0.0442825	0.0127833
13.599	120.028	168.088	176.491	118.14	138.278	112.136	132.27	146.88	133.6	124.651	264.252	126.06		13.599	105.028	153.088	161.491	103.14	123.278	97.136	117.27	131.88	118.6	109.651	249.252	111.06		13.599	0.641497	0.721828	0.767659	0.675501	0.690856	0.698812	0.636683	0.63579	0.708542	0.684524	0.779009	0.693665	0.694531	0.0462502	0.0133513
13.6203	119.737	166.155	178.155	121.409	134.921	108.877	134.164	148.896	129.382	123.078	263.626	125.527		13.6203	104.737	151.155	163.155	106.409	119.921	93.877	119.164	133.896	114.382	108.078	248.626	110.527		13.6203	0.63972	0.712714	0.775569	0.696911	0.672043	0.675367	0.646966	0.64551	0.683343	0.674704	0.777052	0.690336	0.690853	0.0453567	0.0130934
13.6415	119.5	168.394	173.707	118.386	132.528	110.131	135.291	147.484	130.896	120.639	262.79	128.876		13.6415	104.5	153.394	158.707	103.386	117.528	95.131	120.291	132.484	115.896	105.639	247.79	113.876		13.6415	0.638272	0.723271	0.754425	0.677112	0.658632	0.684388	0.653085	0.638702	0.692388	0.659478	0.77444	0.711254	0.688787	0.0443236	0.0127951
13.6627	121.228	165.403	176.331	120.237	134.83	111.982	134.054	146.243	131.736	124.781	268.269	127.45		13.6627	106.228	150.403	161.331	105.237	119.83	96.982	119.054	131.243	116.736	109.781	253.269	112.45		13.6627	0.648827	0.709168	0.766899	0.689235	0.671533	0.697704	0.646369	0.63272	0.697406	0.685335	0.791564	0.702347	0.694926	0.0465294	0.0134319
13.6839	120.898	169.94	174.354	118.885	135.53	110.772	135.822	148.963	135.39	120.089	256.21	126.465		13.6839	105.898	154.94	159.354	103.885	120.53	95.772	120.822	133.963	120.39	105.089	241.21	111.465		13.6839	0.646811	0.73056	0.757501	0.68038	0.675456	0.689	0.655968	0.645833	0.719236	0.656044	0.753875	0.696195	0.692238	0.0399394	0.0115295
13.7051	124.195	167.72	175.009	117.504	136.224	109.419	138.078	145.22	131.413	120.735	256.898	130.904		13.7051	109.195	152.72	160.009	102.504	121.224	94.419	123.078	130.22	116.413	105.735	241.898	115.904		13.7051	0.666949	0.720093	0.760614	0.671336	0.679345	0.679266	0.668216	0.627788	0.695476	0.660077	0.756025	0.72392	0.692425	0.0401248	0.011583
13.7263	121.368	168.824	176.853	116.754	136.24	108.451	135.725	150.388	131.873	123.935	257.166	127.875		13.7263	106.368	153.824	161.853	101.754	121.24	93.451	120.725	135.388	116.873	108.935	242.166	112.875		13.7263	0.649682	0.725298	0.76938	0.666424	0.679435	0.672302	0.655441	0.652702	0.698224	0.680054	0.756862	0.705002	0.692567	0.0399112	0.0115214
13.7476	123.515	167.144	176.513	118.377	136.517	108.49	133.487	150.456	133.098	125.088	267.079	130.001		13.7476	108.515	152.144	161.513	103.377	121.517	93.49	118.487	135.456	118.098	110.088	252.079	115.001		13.7476	0.662795	0.717377	0.767764	0.677053	0.680987	0.672582	0.643291	0.65303	0.705543	0.687252	0.787844	0.71828	0.697817	0.0442378	0.0127703
13.7688	121.021	169.968	175.889	118.853	137.987	110.496	129.205	151.024	132.685	122.867	262.656	130.097		13.7688	106.021	154.968	160.889	103.853	122.987	95.496	114.205	136.024	117.685	107.867	247.656	115.097		13.7688	0.647562	0.730692	0.764797	0.680171	0.689225	0.687014	0.620043	0.655769	0.703075	0.673387	0.774021	0.71888	0.695386	0.0459405	0.0132619
13.79	120.835	169.314	177.156	120.567	135.366	109.484	133.255	149.822	133.981	122.358	257.885	127.685		13.79	105.835	154.314	162.156	105.567	120.366	94.484	118.255	134.822	118.981	107.358	242.885	112.685		13.79	0.646426	0.727609	0.77082	0.691396	0.674537	0.679733	0.642031	0.649974	0.710818	0.670209	0.75911	0.703815	0.693873	0.0423262	0.0122185
13.8112	121.649	169.696	174.107	117.838	134.477	107.529	135.266	149.349	132.775	123.652	263.549	125.624		13.8112	106.649	154.696	159.107	102.838	119.477	92.529	120.266	134.349	117.775	108.652	248.549	110.624		13.8112	0.651398	0.72941	0.756327	0.673523	0.669555	0.665669	0.652949	0.647693	0.703613	0.678287	0.776812	0.690942	0.691348	0.0423454	0.0122241
13.8324	121.607	170.695	181.268	115.611	137.674	104.6	133.068	150.599	131.28	125.257	267.016	125.56		13.8324	106.607	155.695	166.268	100.611	122.674	89.6	118.068	135.599	116.28	110.257	252.016	110.56		13.8324	0.651142	0.73412	0.790367	0.658938	0.687471	0.644597	0.641016	0.65372	0.694682	0.688307	0.787648	0.690543	0.693546	0.0519508	0.0149969
13.8536	119.905	167.748	178.375	116.706	136.912	105.928	134.491	151.433	134.828	126.68	259.991	126.221		13.8536	104.905	152.748	163.375	101.706	121.912	90.928	119.491	136.433	119.828	111.68	244.991	111.221		13.8536	0.640746	0.720225	0.776615	0.666109	0.683201	0.654151	0.648742	0.65774	0.715878	0.69719	0.765692	0.694671	0.693413	0.0445374	0.0128568
13.8748	122.506	168.934	178.947	115.839	136.087	106.609	131.527	151.988	131.91	123.371	267.092	124.283		13.8748	107.506	153.934	163.947	100.839	121.087	91.609	116.527	136.988	116.91	108.371	252.092	109.283		13.8748	0.656633	0.725817	0.779334	0.660431	0.678577	0.65905	0.632649	0.660416	0.698445	0.676533	0.787885	0.682567	0.691528	0.0489575	0.0141328
13.8961	121.016	166.522	184.369	116.537	134.074	106.761	131.599	146.731	132.489	122.055	265.887	126.411		13.8961	106.016	151.522	169.369	101.537	119.074	91.761	116.599	131.731	117.489	107.055	250.887	111.411		13.8961	0.647532	0.714444	0.805108	0.665002	0.667296	0.660144	0.63304	0.635072	0.701904	0.668318	0.784119	0.695858	0.68982	0.055143	0.0159184
13.9173	120.386	167.213	178.517	118.061	136.873	109.741	133.545	148.146	130.142	123.816	261.871	125.783		13.9173	105.386	152.213	163.517	103.061	121.873	94.741	118.545	133.146	115.142	108.816	246.871	110.783		13.9173	0.643684	0.717702	0.77729	0.674984	0.682982	0.681582	0.643606	0.641894	0.687883	0.679311	0.771567	0.691935	0.691202	0.0448257	0.0129401
13.9385	118.698	165.577	174.458	113.139	136.061	106.958	131.901	150.264	130.471	121.324	262.543	128.162		13.9385	103.698	150.577	159.458	98.139	121.061	91.958	116.901	135.264	115.471	106.324	247.543	113.162		13.9385	0.633374	0.709988	0.757995	0.642748	0.678431	0.661561	0.63468	0.652105	0.689848	0.663754	0.773668	0.706794	0.683746	0.0461253	0.0133152
13.9597	120.213	171.063	174.4	112.042	137.482	107.569	132.945	149.367	130.841	126.197	263.216	127.453		13.9597	105.213	156.063	159.4	97.042	122.482	92.569	117.945	134.367	115.841	111.197	248.216	112.453		13.9597	0.642627	0.735855	0.757719	0.635563	0.686395	0.665957	0.640348	0.64778	0.692059	0.694175	0.775771	0.702366	0.689718	0.0469675	0.0135584
13.9809	116.858	168.282	177.722	115.123	133.807	105.665	133.683	148.732	130.985	122.661	261.594	127.445		13.9809	101.858	153.282	162.722	100.123	118.807	90.665	118.683	133.732	115.985	107.661	246.594	112.445		13.9809	0.622135	0.722743	0.773511	0.655742	0.6658	0.652259	0.644355	0.644719	0.692919	0.672101	0.770702	0.702316	0.684942	0.0492264	0.0142104
14.0021	118.566	168.769	176.496	116.387	129.891	109.236	132.543	149.497	133.473	124.191	268.382	126.444		14.0021	103.566	153.769	161.496	101.387	114.891	94.236	117.543	134.497	118.473	109.191	253.382	111.444		14.0021	0.632568	0.725039	0.767683	0.66402	0.643855	0.677949	0.638165	0.648407	0.707783	0.681652	0.791917	0.696064	0.689592	0.0511104	0.0147543
14.0234	118.402	168.411	173.687	118.218	136.451	105.763	133.602	147.568	136.645	123.99	264.126	126.933		14.0234	103.402	153.411	158.687	103.218	121.451	90.763	118.602	132.568	121.645	108.99	249.126	111.933		14.0234	0.631566	0.723351	0.75433	0.676012	0.680617	0.652964	0.643915	0.639107	0.726733	0.680397	0.778615	0.699118	0.690561	0.0471053	0.0135981
14.0446	118.854	167.732	175.184	115.842	135.459	105.957	133.862	148.2	134.39	127.063	267.48	127.753		14.0446	103.854	152.732	160.184	100.842	120.459	90.957	118.862	133.2	119.39	112.063	252.48	112.753		14.0446	0.634327	0.720149	0.761446	0.660451	0.675058	0.65436	0.645327	0.642154	0.713261	0.699581	0.789098	0.70424	0.691621	0.0489797	0.0141392
14.0658	118.864	168.838	173.509	111.862	136.492	108.166	133.875	146.999	132.139	122.527	267.142	124.944		14.0658	103.864	153.838	158.509	96.862	121.492	93.166	118.875	131.999	117.139	107.527	252.142	109.944		14.0658	0.634388	0.725364	0.753484	0.634384	0.680847	0.670252	0.645397	0.636364	0.699813	0.671264	0.788041	0.686695	0.685524	0.0492089	0.0142054
14.087	117.758	163.732	174.773	115.637	135.428	106.533	132.413	146.957	131.305	125.644	267.618	126.5		14.087	102.758	148.732	159.773	100.637	120.428	91.533	117.413	131.957	116.305	110.644	252.618	111.5		14.087	0.627632	0.701289	0.759492	0.659108	0.674884	0.658503	0.63746	0.636162	0.694831	0.690723	0.789529	0.696414	0.685502	0.0489977	0.0141444
14.1082	118.523	165.595	179.134	116.505	137.378	106.313	129.997	153.679	131.762	124.122	268.396	127.261		14.1082	103.523	150.595	164.134	101.505	122.378	91.313	114.997	138.679	116.762	109.122	253.396	112.261		14.1082	0.632305	0.710073	0.780223	0.664793	0.685812	0.656921	0.624343	0.668568	0.697561	0.681221	0.791961	0.701167	0.691246	0.0513681	0.0148287
14.1294	121.803	167.658	174.135	116.623	137.312	104.077	134.946	147.526	129.972	125.027	265.897	127.144		14.1294	106.803	152.658	159.135	101.623	122.312	89.077	119.946	132.526	114.972	110.027	250.897	112.144		14.1294	0.652339	0.7198	0.75646	0.665566	0.685442	0.640835	0.651212	0.638905	0.686867	0.686871	0.78415	0.700436	0.689074	0.0455832	0.0131587
14.1507	119.058	165.508	177.728	115.824	133.663	107.923	134.264	152.553	131.229	120.161	265.362	127.026		14.1507	104.058	150.508	162.728	100.824	118.663	92.923	119.264	137.553	116.229	105.161	250.362	112.026		14.1507	0.635573	0.709663	0.773539	0.660333	0.664993	0.668503	0.647509	0.66314	0.694377	0.656494	0.782478	0.699699	0.688025	0.0472552	0.0136414
14.1719	118.825	166.944	176.366	113.129	138.464	107.389	131.958	153.802	134.534	120.826	271.968	130.238		14.1719	103.825	151.944	161.366	98.129	123.464	92.389	116.958	138.802	119.534	105.826	256.968	115.238		14.1719	0.634149	0.716434	0.767065	0.642682	0.691898	0.664662	0.634989	0.669161	0.714122	0.660645	0.803124	0.719761	0.693224	0.0531753	0.0153504
14.1931	118.902	166.41	175.357	112.783	135.943	107.553	131.537	150.405	131.95	122.261	266.179	128.539		14.1931	103.902	151.41	160.357	97.783	120.943	92.553	116.537	135.405	116.95	107.261	251.179	113.539		14.1931	0.63462	0.713916	0.762269	0.640416	0.67777	0.665842	0.632704	0.652784	0.698684	0.669604	0.785032	0.709149	0.686899	0.0490779	0.0141676
14.2143	117.369	166.98	178.611	116.012	137.406	104.624	131.344	149.458	134.56	124.876	263.144	127.156		14.2143	102.369	151.98	163.611	101.012	122.406	89.624	116.344	134.458	119.56	109.876	248.144	112.156		14.2143	0.625256	0.716604	0.777737	0.661564	0.685969	0.64477	0.631656	0.648219	0.714277	0.685928	0.775546	0.700511	0.689003	0.051026	0.0147299
14.2355	119.338	169.239	181.921	112.526	136.867	104.395	130.436	149.572	131.909	124.501	271.344	125.368		14.2355	104.338	154.239	166.921	97.526	121.867	89.395	115.436	134.572	116.909	109.501	256.344	110.368		14.2355	0.637283	0.727255	0.793471	0.638733	0.682948	0.643122	0.626726	0.648769	0.698439	0.683587	0.801174	0.689343	0.689238	0.0587119	0.0169487
14.2567	121.145	169.537	178.331	113.504	136.478	102.332	133.621	150.35	133.817	126.954	260.057	122.67		14.2567	106.145	154.537	163.331	98.504	121.478	87.332	118.621	135.35	118.817	111.954	245.057	107.67		14.2567	0.64832	0.72866	0.776406	0.645138	0.680768	0.628281	0.644018	0.652519	0.709838	0.698901	0.765898	0.672492	0.687603	0.0491703	0.0141942
14.278	118.177	167.909	176.977	115.195	135.513	108.409	134.504	146.841	135.952	123.162	266.006	128.475		14.278	103.177	152.909	161.977	100.195	120.513	93.409	119.504	131.841	120.952	108.162	251.006	113.475		14.278	0.630192	0.720984	0.769969	0.656213	0.67536	0.672	0.648812	0.635602	0.722593	0.675228	0.784491	0.708749	0.691683	0.0502667	0.0145107
14.2992	118.663	164.15	180.541	116.118	139.927	106.694	136.545	146.225	132.61	121.812	266.428	128.527		14.2992	103.663	149.15	165.541	101.118	124.927	91.694	121.545	131.225	117.61	106.812	251.428	113.527		14.2992	0.63316	0.70326	0.786911	0.662258	0.700097	0.659662	0.659893	0.632633	0.702627	0.666801	0.78581	0.709074	0.691849	0.0513347	0.014819
14.3204	115.989	165.118	180.873	109.741	138.497	105.095	133.627	150.363	133.078	123.673	260.835	126.077		14.3204	100.989	150.118	165.873	94.741	123.497	90.095	118.627	135.363	118.078	108.673	245.835	111.077		14.3204	0.616828	0.707824	0.788489	0.620493	0.692083	0.648158	0.644051	0.652582	0.705423	0.678418	0.76833	0.693772	0.684704	0.0536444	0.0154858
14.3416	120.442	166.758	179.834	114.318	135.604	110.329	130.496	148.598	134.68	125.594	258.38	124.502		14.3416	105.442	151.758	164.834	99.318	120.604	95.329	115.496	133.598	119.68	110.594	243.38	109.502		14.3416	0.644026	0.715557	0.78355	0.650469	0.67587	0.685813	0.627052	0.644073	0.714994	0.690411	0.760657	0.683934	0.689701	0.0476951	0.0137684
14.3628	120.912	167.39	177.257	113.668	132.488	107.389	134.988	146.466	131.407	124.753	265.934	126.726		14.3628	105.912	152.39	162.257	98.668	117.488	92.389	119.988	131.466	116.407	109.753	250.934	111.726		14.3628	0.646897	0.718537	0.7713	0.646212	0.658408	0.664662	0.65144	0.633795	0.69544	0.685161	0.784266	0.697825	0.687829	0.0490168	0.0141499
14.384	117.623	165.784	171.966	112.439	132.122	107.617	135.12	146.902	131.014	124.625	264.557	127.777		14.384	102.623	150.784	156.966	97.439	117.122	92.617	120.12	131.902	116.014	109.625	249.557	112.777		14.384	0.626808	0.710964	0.746149	0.638163	0.656357	0.666302	0.652157	0.635897	0.693092	0.684362	0.779962	0.70439	0.682884	0.0467675	0.0135006
14.4052	117.794	167.82	173.124	114.447	134.776	108.602	135.085	150.914	132.315	122.933	261.4	126.367		14.4052	102.794	152.82	158.124	99.447	119.776	93.602	120.085	135.914	117.315	107.933	246.4	111.367		14.4052	0.627852	0.720564	0.751654	0.651314	0.67123	0.673388	0.651966	0.655238	0.700865	0.673799	0.770095	0.695583	0.686963	0.0427399	0.012338
14.4265	118.727	169.482	176.304	115.885	131.639	110.897	135.021	147.536	132.174	125.923	259.921	127.917		14.4265	103.727	154.482	161.304	100.885	116.639	95.897	120.021	132.536	117.174	110.923	244.921	112.917		14.4265	0.633551	0.728401	0.76677	0.660732	0.65365	0.689899	0.651619	0.638953	0.700023	0.692465	0.765473	0.705264	0.690567	0.0455705	0.0131551
14.4477	121.447	170.195	177.413	116.023	134.49	104.368	135.401	149.919	131.066	127.108	264.507	126.765		14.4477	106.447	155.195	162.413	101.023	119.49	89.368	120.401	134.919	116.066	112.108	249.507	111.765		14.4477	0.650164	0.731763	0.772042	0.661636	0.669628	0.642928	0.653682	0.650441	0.693403	0.699862	0.779806	0.698069	0.691952	0.0472656	0.0136444
14.4689	119.129	164.564	177.061	112.232	136.079	104.872	132.514	148.744	132.395	123.496	263.425	125.568		14.4689	104.129	149.564	162.061	97.232	121.079	89.872	117.514	133.744	117.395	108.496	248.425	110.568		14.4689	0.636006	0.705212	0.770369	0.636807	0.678532	0.646554	0.638008	0.644777	0.701343	0.677313	0.776424	0.690592	0.683495	0.0490399	0.0141566
14.4901	119.052	167.86	174.04	111.09	134.117	109.139	135.131	149.756	132.818	127.554	260.836	128.534		14.4901	104.052	152.86	159.04	96.09	119.117	94.139	120.131	134.756	117.818	112.554	245.836	113.534		14.4901	0.635536	0.720753	0.756008	0.629328	0.667537	0.677251	0.652216	0.649656	0.70387	0.702647	0.768333	0.709118	0.689354	0.0452482	0.013062
14.5113	121.797	161.541	180.314	112.511	134.17	109.279	136.634	149.508	134.394	126.158	263.269	130.151		14.5113	106.797	146.541	165.314	97.511	119.17	94.279	121.634	134.508	119.394	111.158	248.269	115.151		14.5113	0.652302	0.690958	0.785832	0.638635	0.667834	0.678259	0.660376	0.64846	0.713285	0.693932	0.775937	0.719217	0.693752	0.0477722	0.0137906
14.5325	119.317	167.18	177.035	114.403	130.269	104.841	132.92	149.561	135.377	123.747	266.71	130.55		14.5325	104.317	152.18	162.035	99.403	115.269	89.841	117.92	134.561	120.377	108.747	251.71	115.55		14.5325	0.637155	0.717547	0.770245	0.651026	0.645973	0.646331	0.640212	0.648716	0.719158	0.67888	0.786691	0.721709	0.688637	0.0529532	0.0152863
14.5538	119.576	163.793	173.393	114.134	136.028	108.205	136.513	151.055	134.089	127.571	263.805	125.598		14.5538	104.576	148.793	158.393	99.134	121.028	93.205	121.513	136.055	119.089	112.571	248.805	110.598		14.5538	0.638736	0.701577	0.752933	0.649264	0.678247	0.670532	0.659719	0.655918	0.711463	0.702753	0.777612	0.69078	0.690794	0.0418544	0.0120823
14.575	118.798	165.545	174.392	113.069	135.684	107.014	132.554	150.379	131.434	124.339	260.823	128.078		14.575	103.798	150.545	159.392	98.069	120.684	92.014	117.554	135.379	116.434	109.339	245.823	113.078		14.575	0.633985	0.709837	0.757681	0.642289	0.676319	0.661964	0.638225	0.652659	0.695602	0.682576	0.768292	0.70627	0.685475	0.0443864	0.0128132
14.5962	121.426	167.387	175.749	113.278	134.126	108.849	132.131	151.907	132.87	122.216	264.285	128.749		14.5962	106.426	152.387	160.749	98.278	119.126	93.849	117.131	136.907	117.87	107.216	249.285	113.749		14.5962	0.650036	0.718523	0.764132	0.643658	0.667588	0.675165	0.635929	0.660026	0.704181	0.669323	0.779112	0.710461	0.689844	0.0463056	0.0133673
14.6174	119.818	162.036	178.984	110.03	137.961	107.998	136.165	150.163	132.812	122.261	264.461	126.276		14.6174	104.818	147.036	163.984	95.03	122.961	92.998	121.165	135.163	117.812	107.261	249.461	111.276		14.6174	0.640215	0.693292	0.77951	0.622386	0.689079	0.669043	0.65783	0.651618	0.703834	0.669604	0.779662	0.695015	0.687591	0.0491967	0.0142019
14.6386	116.695	166.459	174.379	114.423	138.32	105.545	133.099	151.716	130.564	125.437	263.115	123.149		14.6386	101.695	151.459	159.379	99.423	123.32	90.545	118.099	136.716	115.564	110.437	248.115	108.149		14.6386	0.62114	0.714147	0.75762	0.651157	0.691091	0.651396	0.641184	0.659105	0.690404	0.689431	0.775455	0.675484	0.684801	0.0461465	0.0133213
14.6598	121.564	164.818	179.428	113.579	139.871	108.837	138.315	149.329	132.973	122.091	259.16	128.393		14.6598	106.564	149.818	164.428	98.579	124.871	93.837	123.315	134.329	117.973	107.091	244.16	113.393		14.6598	0.650879	0.70641	0.78162	0.645629	0.699783	0.675079	0.669503	0.647597	0.704796	0.668542	0.763095	0.708237	0.693431	0.0436023	0.0125869
14.6811	119.572	166.011	171.827	117.797	136.028	108.361	133.072	148.73	135.069	120.718	265.192	123.709		14.6811	104.572	151.011	156.827	102.797	121.028	93.361	118.072	133.73	120.069	105.718	250.192	108.709		14.6811	0.638712	0.712035	0.745488	0.673255	0.678247	0.671654	0.641037	0.644709	0.717318	0.659971	0.781947	0.678981	0.686946	0.0442209	0.0127655
14.7023	120.826	161.15	176.118	114.851	136.725	108.483	133.059	147.721	129.534	121.247	259.882	127.883		14.7023	105.826	146.15	161.118	99.851	121.725	93.483	118.059	132.721	114.534	106.247	244.882	112.883		14.7023	0.646371	0.689114	0.765886	0.65396	0.682153	0.672532	0.640967	0.639845	0.684251	0.663274	0.765351	0.705052	0.684063	0.0431456	0.0124551
14.7235	118.197	167.757	176.704	116.937	138.536	107.208	132.262	152.735	133.76	122.654	260.351	126.867		14.7235	103.197	152.757	161.704	101.937	123.536	92.208	117.262	137.735	118.76	107.654	245.351	111.867		14.7235	0.630314	0.720267	0.768672	0.667622	0.692301	0.66336	0.63664	0.664017	0.709498	0.672057	0.766817	0.698706	0.690856	0.0447984	0.0129322
14.7447	122.954	169.111	172.332	114.783	136.379	108.964	133.033	148.44	135.902	123.238	262.229	125.116		14.7447	107.954	154.111	157.332	99.783	121.379	93.964	118.033	133.44	120.902	108.238	247.229	110.116		14.7447	0.659369	0.726652	0.747889	0.653515	0.680214	0.675992	0.640826	0.643311	0.722294	0.675703	0.772686	0.687769	0.690518	0.0425761	0.0122907
14.7659	120.708	169.217	172.52	119.197	132.85	110.456	133.154	151.95	130.313	122.383	264.029	125.902		14.7659	105.708	154.217	157.52	104.197	117.85	95.456	118.154	136.95	115.313	107.383	249.029	110.902		14.7659	0.645651	0.727151	0.748783	0.682424	0.660437	0.686726	0.641483	0.660233	0.688905	0.670365	0.778312	0.692679	0.690262	0.0417533	0.0120531
14.7871	118.882	171.987	169.174	117.488	127.899	109.894	136.1	147.485	130.006	122.685	266.303	127.92		14.7871	103.882	156.987	154.174	102.488	112.899	94.894	121.1	132.485	115.006	107.685	251.303	112.92		14.7871	0.634498	0.740212	0.732877	0.671231	0.632691	0.682683	0.657477	0.638707	0.68707	0.672251	0.785419	0.705283	0.6867	0.0470496	0.0135821
14.8084	121.103	166.823	168.931	119.455	130.471	108.881	133.59	149.315	130.116	124.426	264.78	123.423		14.8084	106.103	151.823	153.931	104.455	115.471	93.881	118.59	134.315	115.116	109.426	249.78	108.423		14.8084	0.648063	0.715863	0.731722	0.684113	0.647105	0.675395	0.64385	0.64753	0.687728	0.683119	0.780659	0.677195	0.685195	0.0408416	0.01179
14.8296	120.8	168.007	176.49	119.392	130.762	109.827	132.711	152.241	133.723	123.547	262.951	127.879		14.8296	105.8	153.007	161.49	104.392	115.762	94.827	117.711	137.241	118.723	108.547	247.951	112.879		14.8296	0.646213	0.721446	0.767654	0.683701	0.648736	0.682201	0.639078	0.661636	0.709277	0.677632	0.774943	0.705027	0.693128	0.0447066	0.0129057
14.8508	120.756	167.977	169.685	118.622	132.628	111.86	131.081	147.79	131.45	122.564	265.791	126.887		14.8508	105.756	152.977	154.685	103.622	117.628	96.86	116.081	132.79	116.45	107.564	250.791	111.887		14.8508	0.645944	0.721305	0.735306	0.678658	0.659193	0.696827	0.630228	0.640178	0.695697	0.671495	0.783819	0.698831	0.688123	0.0440717	0.0127224
14.872	124.139	171.888	172.219	119.314	128.848	107.583	132.173	147.514	131.754	125.067	259.915	128.231		14.872	109.139	156.888	157.219	104.314	113.848	92.583	117.173	132.514	116.754	110.067	244.915	113.231		14.872	0.666607	0.739745	0.747352	0.68319	0.638009	0.666057	0.636157	0.638847	0.697513	0.687121	0.765454	0.707225	0.68944	0.0439012	0.0126732
14.8932	117.701	171.975	172.565	119.332	133.029	111.495	131.512	151.508	133.216	124.42	259.836	129.302		14.8932	102.701	156.975	157.565	104.332	118.029	96.495	116.512	136.508	118.216	109.42	244.836	114.302		14.8932	0.627284	0.740156	0.748997	0.683308	0.66144	0.694201	0.632568	0.658102	0.706248	0.683082	0.765207	0.713915	0.692876	0.0442761	0.0127814
14.9144	119.973	163.842	170.104	117.311	136.235	109.683	134.094	148.438	133.007	125.113	264.295	127.743		14.9144	104.973	148.842	155.104	102.311	121.235	94.683	119.094	133.438	118.007	110.113	249.295	112.743		14.9144	0.641161	0.701808	0.737298	0.670072	0.679407	0.681165	0.646586	0.643302	0.704999	0.687408	0.779143	0.704177	0.68971	0.0402186	0.0116101
14.9356	121.247	166.638	170.558	120.013	140.227	106.601	131.637	150.405	134.384	125.027	257.023	128.879		14.9356	106.247	151.638	155.558	105.013	125.227	91.601	116.637	135.405	119.384	110.027	242.023	113.879		14.9356	0.648943	0.714991	0.739456	0.687768	0.701778	0.658993	0.633247	0.652784	0.713226	0.686871	0.756416	0.711273	0.692145	0.0379291	0.0109492
14.9569	120.384	169.053	171.555	120.357	141.569	105.958	133.571	147.471	132.089	122.047	261.503	125.552		14.9569	105.384	154.053	156.555	105.357	126.569	90.958	118.571	132.471	117.089	107.047	246.503	110.552		14.9569	0.643672	0.726378	0.744195	0.690021	0.709299	0.654367	0.643747	0.63864	0.699515	0.668268	0.770417	0.690493	0.689918	0.0424865	0.0122648
14.9781	121.79	170.175	169.913	119.851	136.218	110.255	129.669	147.238	133.246	123.363	261.39	128.729		14.9781	106.79	155.175	154.913	104.851	121.218	95.255	114.669	132.238	118.246	108.363	246.39	113.729		14.9781	0.652259	0.731668	0.73639	0.686707	0.679311	0.68528	0.622562	0.637516	0.706427	0.676483	0.770064	0.710336	0.69125	0.0426615	0.0123153
14.9993	116.819	169.523	169.849	118.14	139.547	108.326	128.493	148.794	131.529	121.114	261.338	127.224		14.9993	101.819	154.523	154.849	103.14	124.547	93.326	113.493	133.794	116.529	106.114	246.338	112.224		14.9993	0.621897	0.728594	0.736086	0.675501	0.697967	0.671403	0.616177	0.645018	0.696169	0.662443	0.769902	0.700936	0.685174	0.0460889	0.0133047
15.0205	121.149	169.074	171.027	120.579	143.463	108.133	131.823	151.199	130.43	125.12	259.894	128.255		15.0205	106.149	154.074	156.027	105.579	128.463	93.133	116.823	136.199	115.43	110.12	244.894	113.255		15.0205	0.648344	0.726477	0.741686	0.691475	0.719913	0.670014	0.634256	0.656612	0.689604	0.687452	0.765389	0.707375	0.694883	0.0392677	0.0113356
15.0417	120.844	167.89	174.472	120.987	138.084	106.965	128.787	147.857	133.42	123.151	259.241	127.438		15.0417	105.844	152.89	159.472	105.987	123.084	91.965	113.787	132.857	118.42	108.151	244.241	112.438		15.0417	0.646481	0.720894	0.758062	0.694147	0.689768	0.661611	0.617773	0.640501	0.707466	0.67516	0.763348	0.702272	0.68979	0.0447478	0.0129176
15.0629	120.189	164.66	170.79	121.977	134.772	106.4	130.882	148.876	133.648	120.345	253.324	127.431		15.0629	105.189	149.66	155.79	106.977	119.772	91.4	115.882	133.876	118.648	105.345	238.324	112.431		15.0629	0.642481	0.705665	0.740559	0.700631	0.671208	0.657547	0.629148	0.645413	0.708829	0.657643	0.744855	0.702229	0.68385	0.0385845	0.0111384
15.0842	121.658	165.683	175.557	118.927	138.653	111.011	133.26	147.702	134.08	118.327	262.36	128.889		15.0842	106.658	150.683	160.557	103.927	123.653	96.011	118.26	132.702	119.08	103.327	247.36	113.889		15.0842	0.651453	0.710488	0.763219	0.680655	0.692957	0.690719	0.642058	0.639753	0.711409	0.645045	0.773096	0.711335	0.692682	0.0446598	0.0128922
15.1054	124.213	169.447	170.115	116.025	137.423	109.629	132.452	149.666	134.104	121.944	261.613	125.988		15.1054	109.213	154.447	155.115	101.025	122.423	94.629	117.452	134.666	119.104	106.944	246.613	110.988		15.1054	0.667059	0.728236	0.73735	0.661649	0.686064	0.680777	0.637671	0.649222	0.711553	0.667625	0.770761	0.693216	0.690932	0.0393392	0.0113562
15.1266	122.233	169.792	175.421	115.89	139.559	107.422	131.254	153.22	135.805	118.594	261.852	126.933		15.1266	107.233	154.792	160.421	100.89	124.559	92.422	116.254	138.22	120.805	103.594	246.852	111.933		15.1266	0.654965	0.729863	0.762573	0.660765	0.698034	0.664899	0.631167	0.666355	0.721715	0.646712	0.771508	0.699118	0.692306	0.0459204	0.0132561
15.1478	122.309	164.507	177.566	114.745	137.871	104.108	132.951	150.318	134.999	118.937	264.422	126.794		15.1478	107.309	149.507	162.566	99.745	122.871	89.108	117.951	135.318	119.999	103.937	249.422	111.794		15.1478	0.655429	0.704943	0.772769	0.653266	0.688575	0.641058	0.640381	0.652365	0.7169	0.648853	0.77954	0.69825	0.687694	0.0489274	0.0141241
15.169	120.976	164.424	176.321	118.753	133.695	108.142	131.533	146.018	134.173	121.364	263.251	128.818		15.169	105.976	149.424	161.321	103.753	118.695	93.142	116.533	131.018	119.173	106.364	248.251	113.818		15.169	0.647288	0.704552	0.766851	0.679516	0.665172	0.670079	0.632682	0.631635	0.711965	0.664004	0.77588	0.710892	0.688376	0.0473822	0.0136781
15.1902	119.539	163.908	174.27	115.5	131.378	107.874	128.197	146.967	131.56	120.828	267.696	126.963		15.1902	104.539	148.908	159.27	100.5	116.378	92.874	113.197	131.967	116.56	105.828	252.696	111.963		15.1902	0.63851	0.702119	0.757101	0.658211	0.652188	0.668151	0.61457	0.63621	0.696354	0.660658	0.789773	0.699305	0.681096	0.0511615	0.0147691
15.2115	121.535	167.854	174.451	119.113	138.972	106.14	131.088	145.192	129.468	121.58	263.651	124.847		15.2115	106.535	152.854	159.451	104.113	123.972	91.14	116.088	130.192	114.468	106.58	248.651	109.847		15.2115	0.650702	0.720725	0.757962	0.681874	0.694745	0.655676	0.630266	0.627653	0.683856	0.665352	0.777131	0.686089	0.686003	0.0466025	0.013453
15.2327	119.776	166.89	177.691	118.674	137.1	107.36	132.308	150.809	134.344	122.139	269.674	128.314		15.2327	104.776	151.89	162.691	103.674	122.1	92.36	117.308	135.809	119.344	107.139	254.674	113.314		15.2327	0.639958	0.716179	0.773363	0.678998	0.684254	0.664453	0.63689	0.654732	0.712987	0.668842	0.795955	0.707744	0.69453	0.0498008	0.0143763
15.2539	120.941	166.105	172.511	119.644	136.629	106.302	127.524	148.565	135.247	118.527	268.307	125.06		15.2539	105.941	151.105	157.511	104.644	121.629	91.302	112.524	133.565	120.247	103.527	253.307	110.06		15.2539	0.647074	0.712478	0.74874	0.685351	0.681615	0.656842	0.610916	0.643914	0.718381	0.646293	0.791682	0.68742	0.685892	0.0506567	0.0146233
15.2751	121.893	166.715	174.27	117.692	130.461	106.779	131.242	151.428	132.029	122.973	268.756	125.896		15.2751	106.893	151.715	159.27	102.692	115.461	91.779	116.242	136.428	117.029	107.973	253.756	110.896		15.2751	0.652888	0.715354	0.757101	0.672567	0.647049	0.660273	0.631102	0.657716	0.699156	0.674049	0.793086	0.692641	0.687749	0.0476516	0.0137558
15.2963	120.788	166.707	175.461	117.362	132.487	105.933	132.472	145.081	133.368	122.665	266.165	124.218		15.2963	105.788	151.707	160.461	102.362	117.487	90.933	117.472	130.081	118.368	107.665	251.165	109.218		15.2963	0.646139	0.715316	0.762763	0.670406	0.658403	0.654187	0.63778	0.627118	0.707156	0.672126	0.784988	0.682161	0.684878	0.0491643	0.0141925
15.3175	121.693	167.028	175.896	117.358	134.041	102.847	133.205	148.962	136.416	121.325	270.393	125.491		15.3175	106.693	152.028	160.896	102.358	119.041	87.847	118.205	133.962	121.416	106.325	255.393	110.491		15.3175	0.651667	0.71683	0.764831	0.670379	0.667111	0.631986	0.64176	0.645828	0.725365	0.66376	0.798202	0.690112	0.688986	0.0522027	0.0150696
15.3388	123.265	170.453	175.514	118.96	136.514	106.611	133.997	148.299	135.702	119.575	270.093	128.566		15.3388	108.265	155.453	160.514	103.96	121.514	91.611	118.997	133.299	120.702	104.575	255.093	113.566		15.3388	0.661268	0.732979	0.763015	0.680872	0.68097	0.659065	0.64606	0.642631	0.7211	0.652836	0.797264	0.709318	0.695615	0.0496801	0.0143414
15.36	120.459	168.244	176.836	118.163	132.808	110.355	132.888	150.583	132.602	122.018	268.269	125.3		15.36	105.459	153.244	161.836	103.163	117.808	95.355	117.888	135.583	117.602	107.018	253.269	110.3		15.36	0.64413	0.722564	0.769299	0.675652	0.660202	0.686	0.640039	0.653643	0.70258	0.668087	0.791564	0.688919	0.69189	0.0479513	0.0138423
15.3812	122.972	166.457	172.543	115.057	135.954	109.269	133.197	147.017	136.85	122.546	261.268	129.437		15.3812	107.972	151.457	157.543	100.057	120.954	94.269	118.197	132.017	121.85	107.546	246.268	114.437		15.3812	0.659479	0.714138	0.748892	0.655309	0.677832	0.678187	0.641716	0.636451	0.727958	0.671383	0.769683	0.714758	0.691315	0.0430658	0.012432
15.4024	120.643	169.302	174.98	113.896	131.259	108.103	133.71	146.966	132.781	120.388	266.951	123.214		15.4024	105.643	154.302	159.98	98.896	116.259	93.103	118.71	131.966	117.781	105.388	251.951	108.214		15.4024	0.645254	0.727552	0.760476	0.647706	0.651521	0.669798	0.644501	0.636205	0.703649	0.657911	0.787444	0.67589	0.683992	0.0499985	0.0144333
15.4236	122.831	169.646	176.428	116.551	129.206	108.654	133.472	150.91	134.868	120.851	264.463	127.709		15.4236	107.831	154.646	161.428	101.551	114.206	93.654	118.472	135.91	119.868	105.851	249.463	112.709		15.4236	0.658618	0.729174	0.76736	0.665094	0.640016	0.673762	0.643209	0.655219	0.716117	0.660801	0.779668	0.703965	0.691084	0.0477127	0.0137735
15.4448	122.523	169.508	175.355	112.546	134.613	109.31	131.437	146.416	134.416	123.934	267.679	122.052		15.4448	107.523	154.508	160.355	97.546	119.613	94.31	116.437	131.416	119.416	108.934	252.679	107.052		15.4448	0.656736	0.728523	0.762259	0.638864	0.670317	0.678482	0.632161	0.633554	0.713417	0.680048	0.78972	0.668632	0.687726	0.0508692	0.0146847
15.466	121.638	168.359	170.312	113.323	131.985	112.685	132.499	149.226	134.545	121.697	264.21	124.093		15.466	106.638	153.359	155.312	98.323	116.985	97.685	117.499	134.226	119.545	106.697	249.21	109.093		15.466	0.651331	0.723106	0.738287	0.643953	0.655589	0.702762	0.637927	0.6471	0.714187	0.666083	0.778878	0.68138	0.686715	0.0446638	0.0128933
15.4873	119.362	166.227	172.99	114.208	135.527	111.587	133.778	149.701	133.139	119.858	268.947	126.689		15.4873	104.362	151.227	157.99	99.208	120.527	96.587	118.778	134.701	118.139	104.858	253.947	111.689		15.4873	0.637429	0.713053	0.751017	0.649749	0.675439	0.694863	0.644871	0.64939	0.705788	0.654602	0.793683	0.697594	0.688956	0.0475363	0.0137226
15.5085	120.382	163.434	169.791	116.165	138.029	108.75	132.045	148.803	133.868	118.951	263.117	122.015		15.5085	105.382	148.434	154.791	101.165	123.029	93.75	117.045	133.803	118.868	103.951	248.117	107.015		15.5085	0.643659	0.699884	0.73581	0.662566	0.68946	0.674453	0.635462	0.645061	0.710143	0.64894	0.775462	0.668401	0.682442	0.042113	0.012157
15.5297	123.815	165.4	175.21	117.019	137.392	107.394	133.982	149.643	134.695	122.219	271.288	128.765		15.5297	108.815	150.4	160.21	102.019	122.392	92.394	118.982	134.643	119.695	107.219	256.288	113.765		15.5297	0.664628	0.709154	0.76157	0.668159	0.68589	0.664698	0.645978	0.649111	0.715084	0.669341	0.800999	0.710561	0.695431	0.0470226	0.0135743
15.5509	121.269	166.133	177.043	114.258	134.472	109.072	134.423	149.149	137.613	123.082	266.708	124.836		15.5509	106.269	151.133	162.043	99.258	119.472	94.072	119.423	134.149	122.613	108.082	251.708	109.836		15.5509	0.649077	0.71261	0.770283	0.650076	0.669527	0.676769	0.648372	0.646729	0.732516	0.674729	0.786685	0.686021	0.69195	0.0484145	0.0139761
15.5721	125.048	164.432	176.438	116.338	135.485	108.117	132.696	145.346	132.617	119.933	269.898	126.232		15.5721	110.048	149.432	161.438	101.338	120.485	93.117	117.696	130.346	117.617	104.933	254.898	111.232		15.5721	0.672159	0.70459	0.767407	0.663699	0.675204	0.669899	0.638996	0.628395	0.702669	0.655071	0.796655	0.69474	0.689124	0.0495465	0.0143028
15.5933	122.74	165.35	180.084	116.994	140.277	109.261	133.407	145.254	133.919	120.975	268.611	124.36		15.5933	107.74	150.35	165.084	101.994	125.277	94.261	118.407	130.254	118.919	105.975	253.611	109.36		15.5933	0.658062	0.708918	0.784739	0.667996	0.702058	0.678129	0.642856	0.627952	0.710448	0.661575	0.792633	0.683047	0.693201	0.0512403	0.0147918
15.6146	121.42	163.068	175.355	115.668	138.523	107.985	131.671	145.441	136.413	122.268	267.011	124.579		15.6146	106.42	148.068	160.355	100.668	123.523	92.985	116.671	130.441	121.413	107.268	252.011	109.579		15.6146	0.649999	0.698158	0.762259	0.659311	0.692229	0.668949	0.633431	0.628853	0.725347	0.669647	0.787632	0.684415	0.688353	0.0490001	0.0141451
15.6358	119.885	170.683	174.466	118.075	138.129	110.721	132.385	154.011	134.824	126.226	264.649	122.29		15.6358	104.885	155.683	159.466	103.075	123.129	95.721	117.385	139.011	119.824	111.226	249.649	107.29		15.6358	0.640624	0.734064	0.758033	0.675075	0.690021	0.688633	0.637308	0.670169	0.715854	0.694356	0.78025	0.670119	0.696209	0.0438672	0.0126634
15.657	124.305	168.636	176.342	114.48	137.883	113.132	134.661	147.885	136.247	126.363	267.41	123.96		15.657	109.305	153.636	161.342	99.48	122.883	98.132	119.661	132.885	121.247	111.363	252.41	108.96		15.657	0.667621	0.724412	0.766951	0.65153	0.688642	0.705978	0.649665	0.640636	0.724356	0.695211	0.788879	0.680549	0.698702	0.0462919	0.0133633
15.6782	122.816	168.462	178.289	115.522	139.611	107.342	133.9	151.805	134.864	121.604	266.675	127.024		15.6782	107.816	153.462	163.289	100.522	124.611	92.342	118.9	136.805	119.864	106.604	251.675	112.024		15.6782	0.658526	0.723591	0.776206	0.658355	0.698326	0.664324	0.645533	0.659534	0.716093	0.665502	0.786582	0.699686	0.696022	0.0471494	0.0136109
15.6994	119.608	169.112	173.537	119.433	137.282	108.463	133.643	149.948	131.591	118.779	271.255	124.985		15.6994	104.608	154.112	158.537	104.433	122.282	93.463	118.643	134.948	116.591	103.779	256.255	109.985		15.6994	0.638932	0.726656	0.753617	0.683969	0.685274	0.672388	0.644138	0.650581	0.69654	0.647866	0.800896	0.686951	0.690651	0.0487526	0.0140737
15.7206	122.575	167.699	177.987	116.844	136.65	110.687	134.784	148.277	134.201	120.375	271.567	125.049		15.7206	107.575	152.699	162.987	101.844	121.65	95.687	119.784	133.277	119.201	105.375	256.567	110.049		15.7206	0.657054	0.719994	0.77477	0.667013	0.681732	0.688388	0.650332	0.642525	0.712132	0.65783	0.801871	0.687351	0.695083	0.0498495	0.0143903
15.7419	120.113	169.478	177.398	118.683	133.64	109.568	133.084	148.993	134.678	117.322	268.681	126.904		15.7419	105.113	154.478	162.398	103.683	118.64	94.568	118.084	133.993	119.678	102.322	253.681	111.904		15.7419	0.642016	0.728382	0.771971	0.679057	0.664864	0.680338	0.641103	0.645977	0.714982	0.638771	0.792851	0.698937	0.691604	0.0518254	0.0149607
15.7631	124.045	167.411	175.142	117.075	136.513	108.114	133.379	150.64	134.245	121.678	262.902	128.393		15.7631	109.045	152.411	160.142	102.075	121.513	93.114	118.379	135.64	119.245	106.678	247.902	113.393		15.7631	0.666033	0.718636	0.761247	0.668526	0.680965	0.669877	0.642704	0.653917	0.712395	0.665964	0.77479	0.708237	0.693608	0.0419979	0.0121237
15.7843	121.137	167.374	178.118	118.567	136.192	109.228	129.789	146.675	136.047	118.961	259.039	125.084		15.7843	106.137	152.374	163.118	103.567	121.192	94.228	114.789	131.675	121.047	103.961	244.039	110.084		15.7843	0.648271	0.718461	0.775393	0.678298	0.679166	0.677892	0.623213	0.634802	0.723161	0.649003	0.762716	0.687569	0.688162	0.0484158	0.0139764
15.8055	121.411	169.509	175.245	113.686	136.447	109.545	133.726	149.992	133.455	125.18	261.004	125.529		15.8055	106.411	154.509	160.245	98.686	121.447	94.545	118.726	134.992	118.455	110.18	246.004	110.529		15.8055	0.649944	0.728528	0.761736	0.64633	0.680595	0.680172	0.644588	0.650793	0.707676	0.687826	0.768858	0.690349	0.69145	0.0431035	0.0124429
15.8267	122.162	166.603	176.361	112.019	139.636	107.607	132.716	147.54	133.858	121.414	264.106	122.502		15.8267	107.162	151.603	161.361	97.019	124.636	92.607	117.716	132.54	118.858	106.414	249.106	107.502		15.8267	0.654531	0.714826	0.767041	0.635412	0.698466	0.66623	0.639105	0.638972	0.710083	0.664316	0.778553	0.671443	0.686582	0.0483633	0.0139613
15.8479	122.368	167.323	173.615	115.127	137.279	111.121	134.775	146.716	132.258	120.348	264.917	124.006		15.8479	107.368	152.323	158.615	100.127	122.279	96.121	119.775	131.716	117.258	105.348	249.917	109.006		15.8479	0.65579	0.718221	0.753988	0.655768	0.685257	0.69151	0.650283	0.635	0.700524	0.657661	0.781087	0.680836	0.688827	0.0440879	0.0127271
15.8692	121.954	168.807	168.248	117.122	134.508	110.524	134.166	146.721	136.669	124.029	264.999	126.598		15.8692	106.954	153.807	153.248	102.122	119.508	95.524	119.166	131.721	121.669	109.029	249.999	111.598		15.8692	0.653261	0.725218	0.728475	0.668834	0.669728	0.687215	0.646977	0.635024	0.726877	0.680641	0.781344	0.697026	0.691718	0.0422283	0.0121903
15.8904	123.438	168.229	174.215	117.814	135.199	105.772	131.237	149.208	134.115	122.663	262.639	122.329		15.8904	108.438	153.229	159.215	102.814	120.199	90.772	116.237	134.208	119.115	107.663	247.639	107.329		15.8904	0.662325	0.722493	0.75684	0.673366	0.673601	0.653029	0.631075	0.647014	0.711619	0.672113	0.773968	0.670362	0.687317	0.0443733	0.0128095
15.9116	122.564	168.28	170.93	115.343	137.465	106.974	131.196	145.985	133.965	123.426	262.181	126.638		15.9116	107.564	153.28	155.93	100.343	122.465	91.974	116.196	130.985	118.965	108.426	247.181	111.638		15.9116	0.656987	0.722733	0.741224	0.657183	0.6863	0.661676	0.630852	0.631476	0.710722	0.676876	0.772536	0.697276	0.687153	0.0436633	0.0126045
15.9328	119.671	170.259	174.188	114.337	134.922	110.352	134.244	145.287	135.504	121.001	267.226	123.428		15.9328	104.671	155.259	159.188	99.337	119.922	95.352	119.244	130.287	120.504	106.001	252.226	108.428		15.9328	0.639317	0.732064	0.756712	0.650594	0.672048	0.685978	0.647401	0.628111	0.719917	0.661738	0.788304	0.677226	0.688284	0.0502812	0.0145149
15.954	123.862	165.031	175.717	114.575	136.24	108.554	132.39	146.65	137.657	119.575	261.672	126.955		15.954	108.862	150.031	160.717	99.575	121.24	93.554	117.39	131.65	122.657	104.575	246.672	111.955		15.954	0.664915	0.707414	0.76398	0.652153	0.679435	0.673043	0.637335	0.634682	0.732779	0.652836	0.770945	0.699255	0.689064	0.0466217	0.0134585
15.9752	118.251	166.914	172.92	113.562	137.182	109.515	134.982	144.001	138.012	125.294	263.931	129.858		15.9752	103.251	151.914	157.92	98.562	122.182	94.515	119.982	129.001	123.012	110.294	248.931	114.858		15.9752	0.630644	0.716292	0.750684	0.645518	0.684714	0.679956	0.651407	0.621911	0.7349	0.688538	0.778006	0.717387	0.691663	0.0491843	0.0141983
15.9964	120.032	166.55	172.94	114.68	136.907	109.672	134.566	145.244	136.412	124.431	256.149	122.543		15.9964	105.032	151.55	157.94	99.68	121.907	94.672	119.566	130.244	121.412	109.431	241.149	107.543		15.9964	0.641522	0.714576	0.750779	0.65284	0.683173	0.681086	0.649149	0.627903	0.725341	0.68315	0.753684	0.671699	0.686242	0.0417754	0.0120595
16.0177	120.324	163.142	173.273	116.105	136.752	108.957	133.138	146.736	134.942	121.734	260.862	126.863		16.0177	105.324	148.142	158.273	101.105	121.752	93.957	118.138	131.736	119.942	106.734	245.862	111.863		16.0177	0.643305	0.698507	0.752362	0.662173	0.682304	0.675942	0.641396	0.635096	0.716559	0.666314	0.768414	0.698681	0.686754	0.0425483	0.0122826
16.0389	118.806	167.024	169.699	113.1	134.557	115.005	131.045	147.639	132.999	120.552	268.688	125.818		16.0389	103.806	152.024	154.699	98.1	119.557	100.005	116.045	132.639	117.999	105.552	253.688	110.818		16.0389	0.634033	0.716811	0.735373	0.642492	0.670003	0.719452	0.630032	0.63945	0.704951	0.658935	0.792873	0.692154	0.68638	0.0497306	0.014356
16.0601	120.981	167.716	175.011	111.308	134.197	112.933	132.765	145.073	134.334	124.892	266.11	129.268		16.0601	105.981	152.716	160.011	96.308	119.197	97.933	117.765	130.073	119.334	109.892	251.11	114.268		16.0601	0.647318	0.720074	0.760624	0.630756	0.667986	0.704546	0.639371	0.627079	0.712927	0.686028	0.784816	0.713702	0.691269	0.0509156	0.0146981
16.0813	121.085	168.795	175.508	113.548	134.55	108.942	131.815	146.343	135.41	123.715	265.735	129.137		16.0813	106.085	153.795	160.508	98.548	119.55	93.942	116.815	131.343	120.41	108.715	250.735	114.137		16.0813	0.647953	0.725162	0.762986	0.645426	0.669964	0.675834	0.634213	0.633202	0.719355	0.678681	0.783644	0.712884	0.690775	0.0500308	0.0144427
16.1025	119.117	164.607	179.616	117.185	137.624	113.041	132.597	145.109	137.637	119.6	261.68	129.692		16.1025	104.117	149.607	164.616	102.185	122.624	98.041	117.597	130.109	122.637	104.6	246.68	114.692		16.1025	0.635933	0.705415	0.782514	0.669246	0.687191	0.705323	0.638459	0.627253	0.73266	0.652992	0.77097	0.71635	0.693692	0.0515781	0.0148893
16.1237	119.152	172.645	173.74	113.685	130.343	113.086	133.543	147.191	138.531	117.306	263.934	126.282		16.1237	104.152	157.645	158.74	98.685	115.343	98.086	118.543	132.191	123.531	102.306	248.934	111.282		16.1237	0.636147	0.743315	0.754582	0.646324	0.646388	0.705647	0.643595	0.63729	0.738001	0.638671	0.778015	0.695052	0.688585	0.0535866	0.0154691
16.145	118.903	169.977	180.787	114.451	131.251	111.636	130.684	145.852	134.387	119.381	263.98	127.018		16.145	103.903	154.977	165.787	99.451	116.251	96.636	115.684	130.852	119.387	104.381	248.98	112.018		16.145	0.634626	0.730735	0.78808	0.65134	0.651476	0.695215	0.628073	0.630835	0.713244	0.651625	0.778159	0.699649	0.687755	0.0560068	0.0161678
16.1662	118.836	164.865	172.29	115.787	132.468	111.517	134.097	145.536	134.183	118.12	264.688	127.471		16.1662	103.836	149.865	157.29	100.787	117.468	96.517	119.097	130.536	119.183	103.12	249.688	112.471		16.1662	0.634217	0.706631	0.747689	0.66009	0.658296	0.694359	0.646602	0.629311	0.712025	0.643752	0.780372	0.702478	0.684652	0.0474869	0.0137083
16.1874	121.244	168.566	175.157	115.344	133.702	108.485	133.202	144.692	135.285	119.864	265.554	128.811		16.1874	106.244	153.566	160.157	100.344	118.702	93.485	118.202	129.692	120.285	104.864	250.554	113.811		16.1874	0.648924	0.724082	0.761318	0.657189	0.665212	0.672546	0.641743	0.625242	0.718608	0.65464	0.783078	0.710848	0.688619	0.0500881	0.0144592
16.2086	123.003	168.021	174.081	116.993	133.883	106.423	133.49	148.336	140.942	119.456	263.477	127.24		16.2086	108.003	153.021	159.081	101.993	118.883	91.423	118.49	133.336	125.942	104.456	248.477	112.24		16.2086	0.659668	0.721512	0.756203	0.667989	0.666226	0.657712	0.643307	0.64281	0.752404	0.652093	0.776587	0.701036	0.691462	0.0483547	0.0139588
16.2298	120.136	168.438	176.038	116.055	136.127	107.279	133.102	145.806	137.846	123.52	261.167	125.854		16.2298	105.136	153.438	161.038	101.055	121.127	92.279	118.102	130.806	122.846	108.52	246.167	110.854		16.2298	0.642157	0.723478	0.765506	0.661846	0.678801	0.66387	0.6412	0.630613	0.733908	0.677463	0.769367	0.692379	0.690049	0.0476825	0.0137648
16.251	120.577	167.695	173.829	115.297	134.151	106.087	132.37	143.237	137.322	124.039	264.83	122.145		16.251	105.577	152.695	158.829	100.297	119.151	91.087	117.37	128.237	122.322	109.039	249.83	107.145		16.251	0.64485	0.719975	0.755005	0.656881	0.667728	0.655295	0.637226	0.618228	0.730778	0.680703	0.780815	0.669213	0.684725	0.0504446	0.0145621
16.2723	120.595	163.334	167.03	115.01	133.674	108.643	131.5	150.117	135.382	123.326	261.371	125.906		16.2723	105.595	148.334	152.03	100.01	118.674	93.643	116.5	135.117	120.382	108.326	246.371	110.906		16.2723	0.64496	0.699412	0.722686	0.655002	0.665055	0.673683	0.632503	0.651396	0.719188	0.676252	0.770005	0.692704	0.68357	0.0393678	0.0113645
16.2935	117.012	168.106	169.914	115.484	135.669	106.16	131.033	143.984	134.59	123.851	262.355	123.605		16.2935	102.012	153.106	154.914	100.484	120.669	91.16	116.033	128.984	119.59	108.851	247.355	108.605		16.2935	0.623076	0.721913	0.736395	0.658106	0.676235	0.65582	0.629967	0.621829	0.714456	0.67953	0.77308	0.678332	0.680728	0.0476641	0.0137594
16.3147	118.19	167.158	172.871	115.041	133.958	107.155	132.845	143.343	133.335	122.835	265.959	125.337		16.3147	103.19	152.158	157.871	100.041	118.958	92.155	117.845	128.343	118.335	107.835	250.959	110.337		16.3147	0.630271	0.717443	0.750451	0.655205	0.666646	0.662978	0.639805	0.618739	0.706959	0.673187	0.784344	0.68915	0.682931	0.0494802	0.0142837
16.3359	119.805	167.133	179.546	116.83	139.921	108.185	128.508	145.34	132.897	119.79	268.267	125.742		16.3359	104.805	152.133	164.546	101.83	124.921	93.185	113.508	130.34	117.897	104.79	253.267	110.742		16.3359	0.640135	0.717325	0.782181	0.666921	0.700063	0.670388	0.616259	0.628366	0.704342	0.654178	0.791557	0.691679	0.688616	0.0554061	0.0159944
16.3571	120.094	166.368	179.992	116.568	136.096	109.115	128.834	146.596	134.448	124.382	263.717	127.685		16.3571	105.094	151.368	164.992	101.568	121.096	94.115	113.834	131.596	119.448	109.382	248.717	112.685		16.3571	0.6419	0.713718	0.784301	0.665205	0.678628	0.677079	0.618029	0.634421	0.713608	0.682845	0.777337	0.703815	0.690907	0.0516686	0.0149154
16.3783	116.278	166.276	176.679	115.861	137.607	108.009	133.954	147.787	134.991	122.072	261.477	126.222		16.3783	101.278	151.276	161.679	100.861	122.607	93.009	118.954	132.787	119.991	107.072	246.477	111.222		16.3783	0.618593	0.713284	0.768553	0.660575	0.687095	0.669122	0.645826	0.640163	0.716852	0.668424	0.770336	0.694677	0.687792	0.0478261	0.0138062
16.3996	116.842	163.728	177.669	114.724	139.53	108.08	135.743	146.649	134.001	122.471	260.241	128.284		16.3996	101.842	148.728	162.669	99.724	124.53	93.08	120.743	131.649	119.001	107.471	245.241	113.284		16.3996	0.622038	0.70127	0.773259	0.653128	0.697872	0.669633	0.655539	0.634677	0.710937	0.670915	0.766473	0.707556	0.688608	0.0473845	0.0136787
16.4208	118.768	170.881	172.053	113.521	136.975	108.337	131.268	145.639	133.806	119.329	263.563	128.27		16.4208	103.768	155.881	157.053	98.521	121.975	93.337	116.268	130.639	118.806	104.329	248.563	113.27		16.4208	0.633801	0.734997	0.746563	0.64525	0.683554	0.671482	0.631243	0.629808	0.709773	0.6513	0.776856	0.707469	0.685174	0.0498208	0.014382
16.442	118.997	167.141	170.948	114.297	138.371	105.409	134.115	147.981	134.963	120.323	258.725	129.999		16.442	103.997	152.141	155.948	99.297	123.371	90.409	119.115	132.981	119.963	105.323	243.725	114.999		16.442	0.6352	0.717363	0.74131	0.650332	0.691377	0.650417	0.6467	0.641098	0.716685	0.657505	0.761735	0.718268	0.685666	0.043984	0.0126971
16.4632	119.518	169.202	174.278	111.853	134.27	108.923	132.702	147.661	135.136	123.23	261.385	133.014		16.4632	104.518	154.202	159.278	96.853	119.27	93.923	117.702	132.661	120.136	108.23	246.385	118.014		16.4632	0.638382	0.727081	0.757139	0.634325	0.668395	0.675698	0.639029	0.639556	0.717718	0.675653	0.770048	0.737099	0.69001	0.0495993	0.0143181
16.4844	119.423	163.94	172.223	113.407	134.671	109.153	132.93	145.567	137.178	124.08	260.815	128.664		16.4844	104.423	148.94	157.223	98.407	119.671	94.153	117.93	130.567	122.178	109.08	245.815	113.664		16.4844	0.637802	0.70227	0.747371	0.644503	0.670642	0.677352	0.640267	0.629461	0.729918	0.680959	0.768267	0.70993	0.686562	0.0456926	0.0131903
16.5056	116.558	167.88	173.551	112.501	130.993	112.533	131.801	147.789	136.511	121.606	263.712	129.432		16.5056	101.558	152.88	158.551	97.501	115.993	97.533	116.801	132.789	121.511	106.606	248.712	114.432		16.5056	0.620303	0.720847	0.753684	0.638569	0.65003	0.701668	0.634137	0.640173	0.725933	0.665515	0.777321	0.714726	0.686909	0.0521009	0.0150402
16.5268	121.68	165.834	177.227	112.592	136.835	111.593	132.37	144.816	140.164	121.67	265.509	130.577		16.5268	106.68	150.834	162.227	97.592	121.835	96.593	117.37	129.816	125.164	106.67	250.509	115.577		16.5268	0.651587	0.7112	0.771158	0.639165	0.682769	0.694906	0.637226	0.62584	0.747757	0.665914	0.782938	0.721878	0.694361	0.0534407	0.015427
16.5481	124.66	166.746	176.269	113.491	133.911	111.972	131.968	147.329	136.388	120.98	265.356	123.833		16.5481	109.66	151.746	161.269	98.491	118.911	96.972	116.968	132.329	121.388	105.98	250.356	108.833		16.5481	0.669789	0.7155	0.766604	0.645053	0.666383	0.697633	0.635044	0.637955	0.725198	0.661607	0.782459	0.679756	0.690248	0.0486079	0.0140319
16.5693	116.931	165.497	175.943	113.108	134.756	108.075	128.732	146.805	134.933	118.936	262.468	122.734		16.5693	101.931	150.497	160.943	98.108	119.756	93.075	113.732	131.805	119.933	103.936	247.468	107.734		16.5693	0.622581	0.709611	0.765054	0.642545	0.671118	0.669597	0.617475	0.635429	0.716505	0.648847	0.773433	0.672892	0.678757	0.0521875	0.0150652
16.5905	121.515	164.715	171.932	112.883	131.973	106.613	129.419	145.469	134.453	119.05	258.636	127.743		16.5905	106.515	149.715	156.932	97.883	116.973	91.613	114.419	130.469	119.453	104.05	243.636	112.743		16.5905	0.65058	0.705924	0.745988	0.641071	0.655522	0.659079	0.621205	0.628988	0.713638	0.649558	0.761457	0.704177	0.678099	0.0464543	0.0134102
16.6117	119.692	162.961	179.391	112.51	134.043	109.287	131.761	148.143	137.351	118.169	262.767	126.827		16.6117	104.692	147.961	164.391	97.51	119.043	94.287	116.761	133.143	122.351	103.169	247.767	111.827		16.6117	0.639445	0.697654	0.781444	0.638628	0.667123	0.678316	0.63392	0.641879	0.730951	0.644058	0.774368	0.698456	0.68552	0.0526327	0.0151938
16.6329	119.769	165.607	179.755	109.997	137.066	109.708	129.62	146.065	134.713	121.068	259.646	128.332		16.6329	104.769	150.607	164.755	94.997	122.066	94.708	114.62	131.065	119.713	106.068	244.646	113.332		16.6329	0.639915	0.71013	0.783175	0.62217	0.684064	0.681345	0.622296	0.631861	0.715191	0.662156	0.764613	0.707856	0.685398	0.053353	0.0154017
16.6541	119.252	165.433	179.406	113.134	133.753	111.051	133.731	145.382	134.649	118.621	258.772	128.69		16.6541	104.252	150.433	164.406	98.134	118.753	96.051	118.731	130.382	119.649	103.621	243.772	113.69		16.6541	0.636758	0.709309	0.781516	0.642715	0.665497	0.691007	0.644615	0.628569	0.714809	0.64688	0.761882	0.710092	0.686137	0.0505605	0.0145956
16.6754	119.816	164.717	176.575	114.403	130.704	111.32	132.835	146.64	133.929	116.273	257.776	131.051		16.6754	104.816	149.717	161.575	99.403	115.704	96.32	117.835	131.64	118.929	101.273	242.776	116.051		16.6754	0.640202	0.705933	0.768058	0.651026	0.648411	0.692942	0.639751	0.634633	0.710507	0.632222	0.758769	0.724839	0.683941	0.0494844	0.0142849
16.6966	120.188	167.788	176.556	114.941	130.975	108.911	133.44	145.06	129.888	116.874	264.948	128.418		16.6966	105.188	152.788	161.556	99.941	115.975	93.911	118.44	130.06	114.888	101.874	249.948	113.418		16.6966	0.642475	0.720413	0.767968	0.65455	0.649929	0.675611	0.643035	0.627016	0.686366	0.635974	0.781184	0.708393	0.682743	0.0517491	0.0149387
16.7178	120.743	165.179	175.775	112.002	132.645	109.369	135.194	144.209	133.222	120.775	260.767	126.603		16.7178	105.743	150.179	160.775	97.002	117.645	94.369	120.194	129.209	118.222	105.775	245.767	111.603		16.7178	0.645864	0.708112	0.764256	0.635301	0.659288	0.678906	0.652558	0.622914	0.706284	0.660327	0.768117	0.697057	0.683249	0.0471953	0.0136241
16.739	118.8	167.423	174.764	112.078	134.879	106.285	135.117	145.073	132.869	121.954	259.844	127.23		16.739	103.8	152.423	159.764	97.078	119.879	91.285	120.117	130.073	117.869	106.954	244.844	112.23		16.739	0.633997	0.718692	0.75945	0.635799	0.671807	0.656719	0.65214	0.627079	0.704175	0.667687	0.765232	0.700973	0.682813	0.047108	0.0135989
16.7602	120.246	163.927	174.958	113.193	138.125	107.044	131.963	144.358	135.565	120.241	257.556	128.457		16.7602	105.246	148.927	159.958	98.193	123.125	92.044	116.963	129.358	120.565	105.241	242.556	113.457		16.7602	0.642829	0.702208	0.760372	0.643101	0.689998	0.66218	0.635017	0.623632	0.720281	0.656993	0.758081	0.708637	0.683611	0.04693	0.0135475
16.7814	120.012	165.159	173.2	110.643	135.281	110.772	136.021	144.419	133.781	117.704	260.897	128.844		16.7814	105.012	150.159	158.2	95.643	120.281	95.772	121.021	129.419	118.781	102.704	245.897	113.844		16.7814	0.6414	0.708017	0.752015	0.626401	0.67406	0.689	0.657048	0.623926	0.709623	0.641155	0.768523	0.711054	0.683519	0.0478254	0.013806
16.8027	120.264	163.951	175.718	112.812	131.65	107.247	135.554	143.641	132.714	120.42	264.066	125.607		16.8027	105.264	148.951	160.718	97.812	116.65	92.247	120.554	128.641	117.714	105.42	249.066	110.607		16.8027	0.642939	0.702322	0.763985	0.640606	0.653712	0.66364	0.654513	0.620175	0.703249	0.658111	0.778428	0.690836	0.681043	0.0490606	0.0141626
16.8239	119.005	167.414	175.735	110.592	129.381	105.173	132.071	142.881	135.36	120.753	259.848	122.087		16.8239	104.005	152.414	160.735	95.592	114.381	90.173	117.071	127.881	120.36	105.753	244.848	107.087		16.8239	0.635249	0.71865	0.764065	0.626066	0.640996	0.648719	0.635603	0.616511	0.719056	0.66019	0.765245	0.668851	0.674934	0.0530649	0.0153185
16.8451	121.328	164.743	175.173	109.664	135.452	103.924	133.587	147.405	134.902	121.286	257.251	128.761		16.8451	106.328	149.743	160.173	94.664	120.452	88.924	118.587	132.405	119.902	106.286	242.251	113.761		16.8451	0.649437	0.706056	0.761394	0.619989	0.675019	0.639734	0.643834	0.638321	0.71632	0.663517	0.757128	0.710536	0.681774	0.0476396	0.0137524
16.8663	126.177	165.01	177.547	111.262	127.998	108.925	134.883	146.532	130.322	120.887	260.658	126.473		16.8663	111.177	150.01	162.547	96.262	112.998	93.925	119.883	131.532	115.322	105.887	245.658	111.473		16.8663	0.679055	0.707315	0.772679	0.630455	0.633246	0.675712	0.65087	0.634113	0.688958	0.661026	0.767776	0.696245	0.683121	0.047903	0.0138284
16.8875	124.087	166.773	170.749	112.098	131.597	105.65	132.674	145.015	134.728	120.67	264.789	125.972		16.8875	109.087	151.773	155.749	97.098	116.597	90.65	117.674	130.015	119.728	105.67	249.789	110.972		16.8875	0.666289	0.715628	0.740364	0.63593	0.653415	0.652151	0.638877	0.626799	0.715281	0.659671	0.780687	0.693116	0.681517	0.0476611	0.0137586
16.9087	121.151	166.594	173.623	112.685	133.441	106.974	132.178	146.895	136.529	123.418	256.473	126.482		16.9087	106.151	151.594	158.623	97.685	118.441	91.974	117.178	131.895	121.529	108.418	241.473	111.482		16.9087	0.648356	0.714784	0.754026	0.639774	0.663749	0.661676	0.636184	0.635863	0.72604	0.676827	0.754697	0.696301	0.684023	0.0442697	0.0127796
16.93	122.971	165.721	173.935	109.815	131.916	108.527	133.25	148.315	134.312	122.791	268.837	127.823		16.93	107.971	150.721	158.935	94.815	116.916	93.527	118.25	133.315	119.312	107.791	253.837	112.823		16.93	0.659473	0.710667	0.755509	0.620978	0.655203	0.672849	0.642004	0.642709	0.712795	0.672912	0.793339	0.704677	0.686926	0.0504996	0.014578
16.9512	122.643	163.532	172.461	108.43	133.567	105.366	133.635	147.349	133.387	122.811	264.798	130.249		16.9512	107.643	148.532	157.461	93.43	118.567	90.366	118.635	132.349	118.387	107.811	249.798	115.249		16.9512	0.657469	0.700346	0.748502	0.611907	0.664455	0.650108	0.644094	0.638052	0.707269	0.673037	0.780715	0.719829	0.682982	0.0494058	0.0142622
16.9724	123.695	163.724	172.663	111.721	134.907	103.778	135.887	146.974	134.034	121.854	262.043	128.72		16.9724	108.695	148.724	157.663	96.721	119.907	88.778	120.887	131.974	119.034	106.854	247.043	113.72		16.9724	0.663895	0.701251	0.749462	0.633461	0.671964	0.638684	0.656321	0.636244	0.711135	0.667063	0.772105	0.710279	0.684322	0.0449865	0.0129865
16.9936	121.512	164.721	177.336	109.304	132.881	105.901	132.656	145.158	133.348	120.669	261.142	128.829		16.9936	106.512	149.721	162.336	94.304	117.881	90.901	117.656	130.158	118.348	105.669	246.142	113.829		16.9936	0.650561	0.705952	0.771676	0.617631	0.660611	0.653957	0.638779	0.627489	0.707036	0.659665	0.769289	0.71096	0.681134	0.0517032	0.0149254
17.0148	122.456	164.89	174.282	108.685	133.727	107.966	128.029	146.438	133.421	122.139	264.57	128.392		17.0148	107.456	149.89	159.282	93.685	118.727	92.966	113.029	131.438	118.421	107.139	249.57	113.392		17.0148	0.656327	0.706749	0.757158	0.613577	0.665352	0.668813	0.613658	0.63366	0.707472	0.668842	0.780003	0.708231	0.681653	0.0523743	0.0151192
17.036	124.348	165.547	178.085	108.812	135.192	106.11	130.654	150.796	134.276	122.368	267.653	122.48		17.036	109.348	150.547	163.085	93.812	120.192	91.11	115.654	135.796	119.276	107.368	252.653	107.48		17.036	0.667883	0.709847	0.775236	0.614409	0.673562	0.65546	0.62791	0.654669	0.71258	0.670272	0.789638	0.671305	0.685231	0.0533705	0.0154067
17.0572	124.982	166.142	176.767	108.111	133.596	110.03	130.339	147.937	132.832	125.584	269.758	126.348		17.0572	109.982	151.142	161.767	93.111	118.596	95.03	115.339	132.937	117.832	110.584	254.758	111.348		17.0572	0.671756	0.712652	0.768971	0.609818	0.664618	0.683661	0.626199	0.640886	0.703954	0.690348	0.796217	0.695464	0.688712	0.0540754	0.0156102
17.0785	122.008	165.165	172.206	111.757	132.778	107.336	133.155	145.601	132.061	126.485	269.842	125.155		17.0785	107.008	150.165	157.206	96.757	117.778	92.336	118.155	130.601	117.061	111.485	254.842	110.155		17.0785	0.653591	0.708046	0.74729	0.633696	0.660033	0.66428	0.641488	0.629624	0.699347	0.695973	0.79648	0.688013	0.684822	0.049364	0.0142502
17.0997	123.454	163.183	175.286	112.149	129.971	108.404	132.249	145.769	131.934	122.592	264.91	124.418		17.0997	108.454	148.183	160.286	97.149	114.971	93.404	117.249	130.769	116.934	107.592	249.91	109.418		17.0997	0.662423	0.6987	0.761931	0.636264	0.644303	0.671964	0.636569	0.630434	0.698589	0.67167	0.781065	0.68341	0.681444	0.0482247	0.0139213
17.1209	123.475	170.066	171.514	110.383	133.376	108.761	130.575	149.744	130.118	120.279	257.876	128.056		17.1209	108.475	155.066	156.514	95.383	118.376	93.761	115.575	134.744	115.118	105.279	242.876	113.056		17.1209	0.662551	0.731154	0.744001	0.624698	0.663385	0.674532	0.627481	0.649598	0.68774	0.657231	0.759082	0.706132	0.682299	0.0442266	0.0127671
17.1421	121.554	163.798	174.338	111.834	136.046	102.355	131.85	148.756	134.762	120.864	265.744	125.881		17.1421	106.554	148.798	159.338	96.834	121.046	87.355	116.85	133.756	119.762	105.864	250.744	110.881		17.1421	0.650818	0.7016	0.757425	0.634201	0.678347	0.628446	0.634403	0.644835	0.715484	0.660883	0.783672	0.692547	0.681888	0.0503385	0.0145315
17.1633	123.652	165.202	172.549	114.137	135.028	109.865	134.412	146.669	131.975	123.532	263.162	128.552		17.1633	108.652	150.202	157.549	99.137	120.028	94.865	119.412	131.669	116.975	108.532	248.162	113.552		17.1633	0.663632	0.70822	0.748921	0.649284	0.672643	0.682474	0.648313	0.634773	0.698834	0.677538	0.775602	0.70923	0.689122	0.0418048	0.012068
17.1845	120.75	169.073	171.859	114.285	139.108	107.073	128.696	150.618	130.558	118.764	267.283	129.645		17.1845	105.75	154.073	156.859	99.285	124.108	92.073	113.696	135.618	115.558	103.764	252.283	114.645		17.1845	0.645907	0.726472	0.745641	0.650253	0.695507	0.662388	0.617279	0.653811	0.690368	0.647773	0.788482	0.716057	0.686662	0.0498798	0.0143991
17.2058	119.899	166.29	175.062	111.309	136.036	107.578	133.348	145.82	134.198	121.785	266.601	126.552		17.2058	104.899	151.29	160.062	96.309	121.036	92.578	118.348	130.82	119.198	106.785	251.601	111.552		17.2058	0.640709	0.71335	0.760866	0.630762	0.678291	0.666021	0.642536	0.63068	0.712114	0.666632	0.786351	0.696738	0.685421	0.0505443	0.0145909
17.227	122.718	165.928	182.909	114.441	136.791	106.738	132.144	145.672	134.533	119.743	266.854	127.506		17.227	107.718	150.928	167.909	99.441	121.791	91.738	117.144	130.672	119.533	104.743	251.854	112.506		17.227	0.657927	0.711643	0.798168	0.651275	0.682522	0.659978	0.635999	0.629967	0.714116	0.653884	0.787141	0.702697	0.690443	0.0553135	0.0159676
17.2482	119.581	166.872	178.985	114.436	134.456	105.831	131.012	149.136	136.758	123.398	268.884	126.032		17.2482	104.581	151.872	163.985	99.436	119.456	90.831	116.012	134.136	121.758	108.398	253.884	111.032		17.2482	0.638767	0.716094	0.779515	0.651242	0.669437	0.653453	0.629853	0.646667	0.727408	0.676702	0.793486	0.693491	0.689676	0.0542479	0.01566
17.2694	118.845	167.12	174.712	114.726	132.07	107.146	132.877	147.007	134.256	124.158	264.016	126.388		17.2694	103.845	152.12	159.712	99.726	117.07	92.146	117.877	132.007	119.256	109.158	249.016	111.388		17.2694	0.634272	0.717264	0.759203	0.653142	0.656066	0.662914	0.639979	0.636403	0.712461	0.681446	0.778271	0.695714	0.685594	0.0480773	0.0138787
17.2906	119.852	168.247	176.007	117.323	130.476	106.207	134.514	147.844	133.997	121.465	263.127	127.837		17.2906	104.852	153.247	161.007	102.323	115.476	91.207	119.514	132.844	118.997	106.465	248.127	112.837		17.2906	0.640422	0.722578	0.765358	0.67015	0.647133	0.656158	0.648866	0.640438	0.710914	0.664634	0.775493	0.704764	0.687242	0.0479014	0.0138279
17.3118	118.221	170.553	180.123	113.028	132.332	104.435	135.276	148.97	132.892	120.735	262.152	129.558		17.3118	103.221	155.553	165.123	98.028	117.332	89.435	120.276	133.97	117.892	105.735	247.152	114.558		17.3118	0.63046	0.733451	0.784924	0.642021	0.657534	0.64341	0.653003	0.645866	0.704312	0.660077	0.772446	0.715513	0.686918	0.0537005	0.015502
17.3331	122.072	168.026	176.983	111.618	138.171	104.041	132.711	150.529	133.823	120.321	264.201	128.645		17.3331	107.072	153.026	161.983	96.618	123.171	89.041	117.711	135.529	118.823	105.321	249.201	113.645		17.3331	0.653982	0.721536	0.769998	0.632786	0.690256	0.640576	0.639078	0.653382	0.709874	0.657493	0.77885	0.709811	0.688135	0.0504871	0.0145744
17.3543	121.842	165.385	173.689	109.188	133.396	103.783	131.463	150.189	134.447	123.307	256.892	124.682		17.3543	106.842	150.385	158.689	94.188	118.396	88.783	116.463	135.189	119.447	108.307	241.892	109.682		17.3543	0.652577	0.709083	0.75434	0.616871	0.663497	0.63872	0.632302	0.651743	0.713602	0.676134	0.756006	0.685059	0.679161	0.0458234	0.0132281
17.3755	119.675	169.296	172.244	112.493	131.569	105.377	135.008	150.23	134.788	126.002	254.665	124.253		17.3755	104.675	154.296	157.244	97.493	116.569	90.377	120.008	135.23	119.788	111.002	239.665	109.253		17.3755	0.639341	0.727524	0.747471	0.638517	0.653258	0.650187	0.651548	0.651941	0.715639	0.692958	0.749046	0.682379	0.683317	0.0420655	0.0121433
17.3967	123.66	169.321	173.167	112.499	135.333	106.796	134.217	146.656	136.111	125.966	267.637	128.478		17.3967	108.66	154.321	158.167	97.499	120.333	91.796	119.217	131.656	121.111	110.966	252.637	113.478		17.3967	0.663681	0.727642	0.751858	0.638556	0.674352	0.660396	0.647254	0.634711	0.723543	0.692733	0.789588	0.708768	0.692757	0.0485231	0.0140074
17.4179	120.429	163.525	174.465	115.33	132.173	106.577	133.736	148.45	133.857	121.757	264.448	123.182		17.4179	105.429	148.525	159.465	100.33	117.173	91.577	118.736	133.45	118.857	106.757	249.448	108.182		17.4179	0.643946	0.700313	0.758028	0.657097	0.656643	0.65882	0.644642	0.643359	0.710077	0.666457	0.779622	0.67569	0.682891	0.0455701	0.013155
17.4391	121.775	167.224	172.534	114.411	137.612	107.093	134.434	145.374	137.467	120.866	264.696	124.094		17.4391	106.775	152.224	157.534	99.411	122.612	92.093	119.434	130.374	122.467	105.866	249.696	109.094		17.4391	0.652168	0.717754	0.748849	0.651079	0.687123	0.662532	0.648432	0.62853	0.731644	0.660895	0.780397	0.681386	0.687566	0.0469089	0.0135414
17.4604	125.618	167.441	169.215	113.846	132.55	108.758	130.409	146.858	132.547	121.122	259.032	126.336		17.4604	110.618	152.441	154.215	98.846	117.55	93.758	115.409	131.858	117.547	106.122	244.032	111.336		17.4604	0.67564	0.718777	0.733072	0.647378	0.658756	0.67451	0.62658	0.635684	0.702251	0.662493	0.762694	0.695389	0.682769	0.040996	0.0118345
17.4816	119.943	161.871	170.772	113.811	131.138	104.283	132.766	147.649	131.242	120.056	267.107	127.666		17.4816	104.943	146.871	155.772	98.811	116.138	89.283	117.766	132.649	116.242	105.056	252.107	112.666		17.4816	0.640978	0.692514	0.740473	0.647149	0.650843	0.642317	0.639376	0.639498	0.694455	0.655838	0.787932	0.703696	0.677922	0.0476046	0.0137423
17.5028	123.176	162.874	176.224	112.02	133.463	107.772	136.452	146.701	132.603	120.186	260.817	127.97		17.5028	108.176	147.874	161.224	97.02	118.463	92.772	121.452	131.701	117.603	105.186	245.817	112.97		17.5028	0.660725	0.697243	0.76639	0.635419	0.663872	0.667417	0.659388	0.634928	0.702586	0.65665	0.768273	0.705595	0.684874	0.0449362	0.012972
17.524	126.02	162.587	173.764	108.968	136.974	104.636	130.054	147.006	135.194	119.671	262.89	124.511		17.524	111.02	147.587	158.764	93.968	121.974	89.636	115.054	132.006	120.194	104.671	247.89	109.511		17.524	0.678096	0.69589	0.754696	0.61543	0.683548	0.644856	0.624652	0.636398	0.718065	0.653435	0.774752	0.683991	0.680317	0.0498766	0.0143981
17.5452	123.684	163.662	173.042	112.202	130.64	109.473	133.241	144.17	130.667	121.298	262.721	129.373		17.5452	108.684	148.662	158.042	97.202	115.64	94.473	118.241	129.17	115.667	106.298	247.721	114.373		17.5452	0.663828	0.700959	0.751264	0.636611	0.648052	0.679654	0.641955	0.622726	0.691019	0.663592	0.774224	0.714358	0.682353	0.0465084	0.0134258
17.5664	120.802	168.547	171.735	111.018	131.98	108.561	134.01	143.319	133.634	123.58	263.797	127.347		17.5664	105.802	153.547	156.735	96.018	116.98	93.561	119.01	128.319	118.634	108.58	248.797	112.347		17.5664	0.646225	0.723992	0.745051	0.628857	0.655561	0.673093	0.64613	0.618623	0.708745	0.677838	0.777587	0.701704	0.683617	0.0487581	0.0140752
17.5876	120.528	166.594	174.64	113.309	134.638	109.399	133.535	146.469	131.234	124.892	262.713	128.281		17.5876	105.528	151.594	159.64	98.309	119.638	94.399	118.535	131.469	116.234	109.892	247.713	113.281		17.5876	0.644551	0.714784	0.75886	0.643861	0.670457	0.679122	0.643551	0.633809	0.694407	0.686028	0.774199	0.707538	0.687597	0.0454558	0.0131219
17.6089	121.449	167.538	174.513	111.219	132.803	107.829	136.898	146.688	132.952	123.352	265.219	126.285		17.6089	106.449	152.538	159.513	96.219	117.803	92.829	121.898	131.688	117.952	108.352	250.219	111.285		17.6089	0.650177	0.719235	0.758257	0.630173	0.660173	0.667827	0.66181	0.634865	0.704671	0.676415	0.782031	0.695071	0.686725	0.047349	0.0136685
17.6301	117.28	164.983	175.24	109.259	133.247	111.273	133.191	146.997	133.356	118.022	265.61	124.831		17.6301	102.28	149.983	160.24	94.259	118.247	96.273	118.191	131.997	118.356	103.022	250.61	109.831		17.6301	0.624713	0.707188	0.761712	0.617336	0.662662	0.692604	0.641684	0.636355	0.707084	0.643141	0.783253	0.685989	0.68031	0.0531038	0.0153298
17.6513	120.26	168.154	178.086	109.431	135.857	107.175	134.308	147.551	131.797	119.805	261.419	126.035		17.6513	105.26	153.154	163.086	94.431	120.857	92.175	119.308	132.551	116.797	104.805	246.419	111.035		17.6513	0.642914	0.722139	0.775241	0.618463	0.677288	0.663122	0.647748	0.639025	0.69777	0.654271	0.770155	0.693509	0.683471	0.0505997	0.0146069
17.6725	120.513	167.045	172.851	109.175	130.35	105.317	131.644	147.309	135.753	120.51	259.699	125.235		17.6725	105.513	152.045	157.851	94.175	115.35	90.317	116.644	132.309	120.753	105.51	244.699	110.235		17.6725	0.64446	0.71691	0.750356	0.616786	0.646427	0.649755	0.633285	0.637859	0.721404	0.658673	0.764779	0.688513	0.677434	0.0494715	0.0142812
17.6937	119.317	171.492	173.922	109.845	140.405	107.159	132.576	146.098	132.328	122.639	260.949	122.826		17.6937	104.317	156.492	158.922	94.845	125.405	92.159	117.576	131.098	117.328	107.639	245.949	107.826		17.6937	0.637155	0.737878	0.755447	0.621174	0.702775	0.663007	0.638345	0.63202	0.700943	0.671963	0.768686	0.673466	0.683572	0.0499464	0.0144183
17.7149	119.783	165.089	171.436	111.626	134.609	107.573	133.7	149.386	133.831	122.274	261.347	125.641		17.7149	104.783	150.089	156.436	96.626	119.609	92.573	118.7	134.386	118.831	107.274	246.347	110.641		17.7149	0.640001	0.707687	0.74363	0.632839	0.670294	0.665985	0.644447	0.647872	0.709922	0.669685	0.76993	0.691048	0.682778	0.0430062	0.0124148
17.7362	118.207	165.225	170.794	112.981	136.179	104.466	132.852	144.625	130.324	119.058	257.563	125.915		17.7362	103.207	150.225	155.794	97.981	121.179	89.466	117.852	129.625	115.324	104.058	242.563	110.915		17.7362	0.630375	0.708329	0.740578	0.641713	0.679093	0.643633	0.639843	0.624919	0.68897	0.649608	0.758103	0.69276	0.674827	0.0440212	0.0127078
17.7574	119.276	167.624	171.923	111.783	132.144	107.607	132.341	148.849	130.665	120.189	256.331	126.551		17.7574	104.276	152.624	156.923	96.783	117.144	92.607	117.341	133.849	115.665	105.189	241.331	111.551		17.7574	0.636904	0.71964	0.745945	0.633867	0.65648	0.66623	0.637069	0.645283	0.691007	0.656669	0.754253	0.696732	0.67834	0.0427707	0.0123468
17.7786	121.177	167.662	175.979	113.423	139.101	108.656	129.877	146.146	132.327	120.657	256.673	128.726		17.7786	106.177	152.662	160.979	98.423	124.101	93.656	114.877	131.146	117.327	105.657	241.673	113.726		17.7786	0.648515	0.719819	0.765225	0.644608	0.695468	0.673777	0.623691	0.632252	0.700937	0.65959	0.755322	0.710317	0.685793	0.0465793	0.0134463
17.7998	119.987	168.092	176.357	117.151	136.349	107.12	127.732	148.845	131.759	120.412	255.05	123.246		17.7998	104.987	153.092	161.357	102.151	121.349	92.12	112.732	133.845	116.759	105.412	240.05	108.246		17.7998	0.641247	0.721847	0.767022	0.669024	0.680045	0.662726	0.612046	0.645264	0.697543	0.658061	0.750249	0.67609	0.681764	0.0454984	0.0131342
17.821	119.872	164.41	175.152	112.859	137.903	108.761	128.94	149.104	130.578	120.224	258.607	123.471		17.821	104.872	149.41	160.152	97.859	122.903	93.761	113.94	134.104	115.578	105.224	243.607	108.471		17.821	0.640544	0.704486	0.761294	0.640914	0.688754	0.674532	0.618604	0.646512	0.690488	0.656887	0.761366	0.677495	0.680156	0.0452878	0.0130735
17.8422	122.011	165.709	170.246	111.623	141.044	109.9	131.934	146.606	131.705	123.228	264.285	124.465		17.8422	107.011	150.709	155.246	96.623	126.044	94.9	116.934	131.606	116.705	108.228	249.285	109.465		17.8422	0.653609	0.710611	0.737973	0.632819	0.706356	0.682726	0.634859	0.63447	0.697221	0.67564	0.779112	0.683703	0.685758	0.0445052	0.0128475
17.8635	121.434	165.211	173.291	112.491	136.215	106.941	129.778	147.94	129.765	120.426	264.658	127.55		17.8635	106.434	150.211	158.291	97.491	121.215	91.941	114.778	132.94	114.765	105.426	249.658	112.55		17.8635	0.650085	0.708263	0.752448	0.638504	0.679295	0.661439	0.623154	0.640901	0.685631	0.658148	0.780278	0.702972	0.68176	0.047506	0.0137138
17.8847	121.934	165.775	170.165	112.856	137.453	106.043	129.075	151.903	133.706	120.316	259.02	127.109		17.8847	106.934	150.775	155.165	97.856	122.453	91.043	114.075	136.903	118.706	105.316	244.02	112.109		17.8847	0.653139	0.710922	0.737588	0.640894	0.686232	0.654978	0.619337	0.660006	0.709175	0.657462	0.762657	0.700217	0.682717	0.0424044	0.0122411
17.9059	123.138	165.023	175.644	112.264	137.917	104.888	135.092	143.738	134.606	118.908	264.996	125.201		17.9059	108.138	150.023	160.644	97.264	122.917	89.888	120.092	128.738	119.606	103.908	249.996	110.201		17.9059	0.660493	0.707376	0.763633	0.637017	0.688833	0.646669	0.652004	0.620643	0.714552	0.648672	0.781334	0.6883	0.684127	0.0502506	0.0145061
17.9271	120.463	169.119	174.243	113.939	133.958	106.781	133.684	146.224	134.613	120.549	262.812	128.273		17.9271	105.463	154.119	159.243	98.939	118.958	91.781	118.684	131.224	119.613	105.549	247.812	113.273		17.9271	0.644154	0.726689	0.756973	0.647987	0.666646	0.660288	0.64436	0.632628	0.714594	0.658916	0.774508	0.707488	0.686269	0.0480083	0.0138588
17.9483	119.07	165.939	168.574	113.373	136.086	106.19	128.586	148.312	133.518	118.47	265.494	125.82		17.9483	104.07	150.939	153.574	98.373	121.086	91.19	113.586	133.312	118.518	103.47	250.494	110.82		17.9483	0.635646	0.711695	0.730025	0.64428	0.678572	0.656036	0.616682	0.642694	0.708052	0.645937	0.782891	0.692166	0.678723	0.0480432	0.0138689
17.9695	118.546	168.147	174.238	108.759	133.959	104.329	128.584	145.975	131.338	120.846	264.215	124.879		17.9695	103.546	153.147	159.238	93.759	118.959	89.329	113.584	130.975	116.338	105.846	249.215	109.879		17.9695	0.632445	0.722106	0.756949	0.614062	0.666652	0.642648	0.616671	0.631427	0.695028	0.66077	0.778893	0.686289	0.675328	0.0542719	0.015667
17.9908	121.447	163.519	174.633	108.058	133.306	102.306	126.788	144.065	135.818	122.599	257.564	126.677		17.9908	106.447	148.519	159.633	93.058	118.306	87.306	111.788	129.065	120.818	107.599	242.564	111.677		17.9908	0.650164	0.700285	0.758827	0.60947	0.662992	0.628094	0.60692	0.622219	0.721793	0.671714	0.758106	0.697519	0.674009	0.0538892	0.0155565
18.012	119.213	165.277	171.305	109.833	133.692	104.233	129.077	145.588	132.662	121.345	263.17	126.989		18.012	104.213	150.277	156.305	94.833	118.692	89.233	114.077	130.588	117.662	106.345	248.17	111.989		18.012	0.636519	0.708574	0.743007	0.621096	0.665155	0.641957	0.619348	0.629562	0.702938	0.663885	0.775627	0.699468	0.675595	0.0505547	0.0145939
18.0332	116.257	167.587	171.923	112.46	136.378	106.671	132.011	147.757	133.142	121.567	265.405	122.335		18.0332	101.257	152.587	156.923	97.46	121.378	91.671	117.011	132.757	118.142	106.567	250.405	107.335		18.0332	0.618464	0.719466	0.745945	0.638301	0.680208	0.659496	0.635277	0.640018	0.705806	0.665271	0.782613	0.6704	0.680105	0.0495021	0.01429
18.0544	118.319	165.849	171.754	110.729	135.549	105.964	131.378	146.962	136.449	122.957	267.347	125.62		18.0544	103.319	150.849	156.754	95.729	120.549	90.964	116.378	131.962	121.449	107.957	252.347	110.62		18.0544	0.631059	0.711271	0.745141	0.626964	0.675562	0.65441	0.63184	0.636186	0.725562	0.673949	0.788682	0.690917	0.682629	0.0516135	0.0148995
18.0756	122.024	161.872	174.403	110.337	135.09	105.919	132.243	145.66	133.81	123.033	256.5	127.664		18.0756	107.024	146.872	159.403	95.337	120.09	90.919	117.243	130.66	118.81	108.033	241.5	112.664		18.0756	0.653689	0.692519	0.757734	0.624396	0.67299	0.654086	0.636537	0.629909	0.709796	0.674423	0.754781	0.703684	0.680379	0.0448963	0.0129604
18.0968	121.009	165.978	173.629	114.634	134.969	101.946	130.797	147.931	132.342	119.511	265.125	122.92		18.0968	106.009	150.978	158.629	99.634	119.969	86.946	115.797	132.931	117.342	104.511	250.125	107.92		18.0968	0.647489	0.711879	0.754054	0.652539	0.672312	0.625504	0.628686	0.640857	0.701026	0.652436	0.781737	0.674053	0.678548	0.0496058	0.0143199
18.118	123.076	164.81	171.527	109.722	134.08	105.425	131.948	150.019	135.309	121.326	256.943	124.726		18.118	108.076	149.81	156.527	94.722	119.08	90.425	116.948	135.019	120.309	106.326	241.943	109.726		18.118	0.660114	0.706372	0.744062	0.620369	0.66733	0.650532	0.634935	0.650924	0.718752	0.663767	0.756166	0.685333	0.679888	0.0429065	0.0123861
18.1393	120.807	165.095	168.028	112.83	130.868	105.201	133.179	147.986	133.492	122.523	262.987	128.282		18.1393	105.807	150.095	153.028	97.83	115.868	90.201	118.179	132.986	118.492	107.523	247.987	113.282		18.1393	0.646255	0.707716	0.72743	0.640724	0.64933	0.648921	0.641618	0.641122	0.707897	0.671239	0.775055	0.707544	0.680404	0.0439394	0.0126842
18.1605	118.269	162.964	172.31	114.911	132.285	107.838	131.011	146.739	134.98	123.416	256.771	122.647		18.1605	103.269	147.964	157.31	99.911	117.285	92.838	116.011	131.739	119.98	108.416	241.771	107.647		18.1605	0.630754	0.697668	0.747784	0.654353	0.657271	0.667892	0.629848	0.635111	0.716786	0.676814	0.755628	0.672348	0.678521	0.0429573	0.0124007
18.1817	119.695	164.391	166.877	113.983	134.543	104.707	130.363	150.233	133.631	121.866	264.37	123.43		18.1817	104.695	149.391	151.877	98.983	119.543	89.707	115.363	135.233	118.631	106.866	249.37	108.43		18.1817	0.639463	0.704396	0.721958	0.648275	0.669925	0.645367	0.62633	0.651955	0.708727	0.667138	0.779378	0.677239	0.678346	0.0435	0.0125574
18.2029	119.444	164.527	168.238	111.014	133.854	104.044	131.704	150.715	131.426	120.293	259.327	125.191		18.2029	104.444	149.527	153.238	96.014	118.854	89.044	116.704	135.715	116.426	105.293	244.327	110.191		18.2029	0.63793	0.705037	0.728428	0.62883	0.666063	0.640597	0.63361	0.654279	0.695554	0.657318	0.763616	0.688238	0.674958	0.04203	0.012133
18.2241	118.349	158.595	171.908	109.84	133.245	106.146	128.628	148.381	135.396	122.082	268.171	126.062		18.2241	103.349	143.595	156.908	94.84	118.245	91.146	113.628	133.381	120.396	107.082	253.171	111.062		18.2241	0.631242	0.677067	0.745873	0.621141	0.66265	0.655719	0.61691	0.643027	0.719272	0.668486	0.791257	0.693678	0.677194	0.0527198	0.0152189
18.2453	119.972	164.08	171.873	113.269	134.108	104.957	128.416	145.855	133.173	120.906	267.231	127.153		18.2453	104.972	149.08	156.873	98.269	119.108	89.957	113.416	130.855	118.173	105.906	252.231	112.153		18.2453	0.641155	0.70293	0.745707	0.643599	0.667487	0.647165	0.615759	0.630849	0.705991	0.661145	0.788319	0.700492	0.679217	0.0510181	0.0147276
18.2666	122.42	163.844	166.941	116.414	133.116	106.273	129.123	146.092	132.273	120.053	265.132	125.055		18.2666	107.42	148.844	151.941	101.414	118.116	91.273	114.123	131.092	117.273	105.053	250.132	110.055		18.2666	0.656107	0.701817	0.722262	0.664197	0.661928	0.656633	0.619598	0.631992	0.700614	0.65582	0.781759	0.687388	0.678343	0.0439988	0.0127014
18.2878	119.593	163.298	171.46	113.627	133.154	107.142	126.309	144.972	135.786	116.928	262.361	127.813		18.2878	104.593	148.298	156.46	98.627	118.154	92.142	111.309	129.972	120.786	101.928	247.361	112.813		18.2878	0.63884	0.699243	0.743744	0.645944	0.662141	0.662885	0.60432	0.626592	0.721601	0.636311	0.773099	0.704614	0.676611	0.05157	0.014887
18.309	117.487	166.147	171.47	113.815	133.949	107.053	126.553	148.193	134.374	119.198	260.425	129.175		18.309	102.487	151.147	156.47	98.815	118.949	92.053	111.553	133.193	119.374	104.198	245.425	114.175		18.309	0.625977	0.712676	0.743791	0.647175	0.666596	0.662244	0.605644	0.64212	0.713166	0.650482	0.767048	0.713121	0.67917	0.049753	0.0143625
18.3302	115.128	165.303	169.998	114.01	132.106	107.164	130.557	146.682	133.818	120.746	264.483	127.167		18.3302	100.128	150.303	154.998	99.01	117.106	92.164	115.557	131.682	118.818	105.746	249.483	112.167		18.3302	0.611569	0.708696	0.736794	0.648452	0.656267	0.663043	0.627383	0.634836	0.709844	0.660146	0.779731	0.70058	0.678112	0.0495417	0.0143014
18.3514	119.204	163.949	170.894	113.405	134.398	108.014	128.798	144.039	133.165	119.766	266.873	130.31		18.3514	104.204	148.949	155.894	98.405	119.398	93.014	113.798	129.039	118.165	104.766	251.873	115.31		18.3514	0.636464	0.702312	0.741053	0.64449	0.669112	0.669158	0.617833	0.622094	0.705943	0.654028	0.787201	0.72021	0.680825	0.0515962	0.0148945
18.3726	120.404	166.888	170.115	110.591	138.156	108.984	132.516	144.161	132.547	120.01	268.859	131.291		18.3726	105.404	151.888	155.115	95.591	123.156	93.984	117.516	129.161	117.547	105.01	253.859	116.291		18.3726	0.643794	0.71617	0.73735	0.62606	0.690172	0.676136	0.638019	0.622682	0.702251	0.655551	0.793408	0.726338	0.685661	0.0519621	0.0150002
18.3939	121.893	165.965	168.846	112.579	133.437	105.861	127.516	143.329	134.477	119.052	268.538	127.257		18.3939	106.893	150.965	153.846	97.579	118.437	90.861	112.516	128.329	119.477	104.052	253.538	112.257		18.3939	0.652888	0.711818	0.731318	0.63908	0.663726	0.653669	0.610873	0.618671	0.713781	0.649571	0.792404	0.701142	0.678245	0.0527991	0.0152418
18.4151	121.749	163.771	175.691	115.551	135.387	109.936	130.85	144.354	134.036	121.375	266.244	128.745		18.4151	106.749	148.771	160.691	100.551	120.387	94.936	115.85	129.354	119.036	106.375	251.244	113.745		18.4151	0.652009	0.701473	0.763856	0.658545	0.674654	0.682985	0.628974	0.623613	0.711147	0.664073	0.785235	0.710436	0.688083	0.0495414	0.0143014
18.4363	123.612	165.283	173.76	113.461	135.875	112.635	129.165	147.368	131.375	121.322	265.888	126.546		18.4363	108.612	150.283	158.76	98.461	120.875	97.635	114.165	132.368	116.375	106.322	250.888	111.546		18.4363	0.663388	0.708602	0.754677	0.644857	0.677389	0.702402	0.619826	0.638143	0.695249	0.663742	0.784122	0.696701	0.687425	0.0474275	0.0136911
18.4575	121.736	163.394	170.188	114.22	131.98	110.571	132.239	145.477	136.174	123.634	262.811	127.364		18.4575	106.736	148.394	155.188	99.22	116.98	95.571	117.239	130.477	121.174	108.634	247.811	112.364		18.4575	0.651929	0.699695	0.737697	0.649828	0.655561	0.687554	0.636515	0.629027	0.723919	0.678175	0.774505	0.70181	0.685518	0.0442437	0.0127721
18.4787	120.868	165.748	173.656	112.561	131.828	107.451	129.072	148.332	131.547	119.529	263.554	126.77		18.4787	105.868	150.748	158.656	97.561	116.828	92.451	114.072	133.332	116.547	104.529	248.554	111.77		18.4787	0.646628	0.710795	0.754183	0.638962	0.65471	0.665108	0.619321	0.642791	0.696277	0.652548	0.776827	0.6981	0.679687	0.0485214	0.0140069
18.4999	120.534	162.806	166.038	114.869	130.131	106.72	133.217	147.361	132.604	121.491	263.655	130.239		18.4999	105.534	147.806	151.038	99.869	115.131	91.72	118.217	132.361	117.604	106.491	248.655	115.239		18.4999	0.644588	0.696923	0.71797	0.654078	0.645199	0.659849	0.641825	0.638109	0.702591	0.664797	0.777143	0.719767	0.680237	0.0428978	0.0123835
18.5212	120.078	167.806	166.719	111.593	133.471	107.696	132.123	146.789	132.907	116.955	256.627	128.4		18.5212	105.078	152.806	151.719	96.593	118.471	92.696	117.123	131.789	117.907	101.955	241.627	113.4		18.5212	0.641803	0.720498	0.721207	0.632622	0.663917	0.66687	0.635885	0.635352	0.704402	0.63648	0.755178	0.708281	0.676875	0.0428912	0.0123816
18.5424	121.343	162.297	175.1	113.63	132.203	108.111	131.678	146.203	132.849	120.745	263.473	125.699		18.5424	106.343	147.297	160.1	98.63	117.203	93.111	116.678	131.203	117.849	105.745	248.473	110.699		18.5424	0.649529	0.694523	0.761047	0.645963	0.656811	0.669856	0.633469	0.632527	0.704055	0.66014	0.776574	0.691411	0.681325	0.0470346	0.0135777
18.5636	117.56	161.887	167.493	111.632	134.638	108.042	132.712	141.641	131.652	124.143	262.497	127.094		18.5636	102.56	146.887	152.493	96.632	119.638	93.042	117.712	126.641	116.652	109.143	247.497	112.094		18.5636	0.626423	0.69259	0.724886	0.632878	0.670457	0.669359	0.639083	0.610533	0.696904	0.681353	0.773524	0.700124	0.676509	0.0459856	0.0132749
18.5848	118.809	162.656	171.892	114.232	129.551	107.476	127.189	144.597	132.456	119.794	266.093	130.386		18.5848	103.809	147.656	156.892	99.232	114.551	92.476	112.189	129.597	117.456	104.794	251.093	115.386		18.5848	0.634052	0.696215	0.745797	0.649906	0.641949	0.665288	0.609097	0.624784	0.701707	0.654203	0.784763	0.720685	0.677371	0.0531154	0.0153331
18.606	121.377	163.715	166.041	113.624	133.146	106.812	127.164	144.62	132.847	120.055	267.375	127.802		18.606	106.377	148.715	151.041	98.624	118.146	91.812	112.164	129.62	117.847	105.055	252.375	112.802		18.606	0.649737	0.701209	0.717984	0.645924	0.662096	0.660511	0.608962	0.624895	0.704043	0.655832	0.78877	0.704546	0.677042	0.0488444	0.0141002
18.6272	119.922	165.796	168.975	113.962	132.261	105.096	127.847	146.079	135.16	119.859	269.697	125.5		18.6272	104.922	150.796	153.975	98.962	117.261	90.096	112.847	131.079	120.16	104.859	254.697	110.5		18.6272	0.64085	0.711021	0.731931	0.648138	0.657136	0.648165	0.61267	0.631929	0.717862	0.654609	0.796027	0.690168	0.678375	0.0523967	0.0151256
18.6484	125.548	165.686	170.412	112.671	130.785	103.635	129.914	144.839	134.179	123.094	264.37	127.08		18.6484	110.548	150.686	155.412	97.671	115.785	88.635	114.914	129.839	119.179	108.094	249.37	112.08		18.6484	0.675213	0.710502	0.738762	0.639683	0.648865	0.637655	0.623892	0.625951	0.712001	0.674804	0.779378	0.700036	0.680562	0.0487931	0.0140853
18.6697	119.079	164.025	168.335	108.765	126.474	106.512	128.472	148.247	133.644	124.408	260.276	127.071		18.6697	104.079	149.025	153.335	93.765	111.474	91.512	113.472	133.247	118.644	109.408	245.276	112.071		18.6697	0.635701	0.70267	0.728889	0.614101	0.624705	0.658352	0.616063	0.642381	0.708805	0.683007	0.766582	0.69998	0.673436	0.0490417	0.0141571
18.6909	121.33	166.322	170.295	111.386	128.825	105.402	130.336	143.722	133.348	121.634	264.99	130.509		18.6909	106.33	151.322	155.295	96.386	113.825	90.402	115.336	128.722	118.348	106.634	249.99	115.509		18.6909	0.64945	0.713501	0.738206	0.631267	0.637881	0.650367	0.626183	0.620566	0.707036	0.665689	0.781316	0.721453	0.678576	0.0520437	0.0150237
18.7121	120.533	165.598	173.844	109.062	132.695	104.981	129.117	145.423	132.247	121.23	257.588	129.263		18.7121	105.533	150.598	158.844	94.062	117.695	89.981	114.117	130.423	117.247	106.23	242.588	114.263		18.7121	0.644582	0.710087	0.755076	0.616046	0.659568	0.647338	0.619565	0.628766	0.700459	0.663167	0.758181	0.713671	0.676376	0.0499437	0.0144175
18.7333	122.147	164.633	169.516	107.362	137.323	108.718	129.808	144.463	132.714	119.029	267.509	127.069		18.7333	107.147	149.633	154.516	92.362	122.323	93.718	114.808	129.463	117.714	104.029	252.509	112.069		18.7333	0.65444	0.705537	0.734503	0.604912	0.685504	0.674223	0.623317	0.624138	0.703249	0.649427	0.789188	0.699968	0.679034	0.052307	0.0150997
18.7545	124.075	163.219	168.42	112.742	131.898	104.514	130.805	145.329	132.51	119.456	262.61	127.914		18.7545	109.075	148.219	153.42	97.742	116.898	89.514	115.805	130.329	117.51	104.456	247.61	112.914		18.7545	0.666216	0.69887	0.729293	0.640148	0.655102	0.643978	0.628729	0.628313	0.70203	0.652093	0.773877	0.705245	0.676991	0.0451135	0.0130231
18.7757	127.093	165.47	170.852	107.385	132.635	103.484	130.795	146.624	134.007	121.007	258.105	125.454		18.7757	112.093	150.47	155.852	92.385	117.635	88.484	115.795	131.624	119.007	106.007	243.105	110.454		18.7757	0.684649	0.709484	0.740854	0.605063	0.659232	0.636568	0.628675	0.634556	0.710973	0.661775	0.759797	0.68988	0.676792	0.0475394	0.0137234
18.797	123.874	163.959	169.524	110.123	132.082	108.415	127.897	145.775	133.259	120.467	270.197	125.284		18.797	108.874	148.959	154.524	95.123	117.082	93.415	112.897	130.775	118.259	105.467	255.197	110.284		18.797	0.664988	0.702359	0.734541	0.622995	0.656133	0.672043	0.612941	0.630463	0.706505	0.658404	0.797589	0.688819	0.678982	0.0518694	0.0149734
18.8182	123.361	162.737	164.481	109.821	129.984	109.781	130.67	145.39	131.167	120.012	267.553	128.586		18.8182	108.361	147.737	149.481	94.821	114.984	94.781	115.67	130.39	116.167	105.012	252.553	113.586		18.8182	0.661855	0.696597	0.710569	0.621017	0.644376	0.68187	0.627997	0.628607	0.694007	0.655564	0.789326	0.709442	0.676769	0.0477906	0.013796
18.8394	121.384	166.536	172.503	112.114	129.391	107.847	128.757	145.81	131.907	118.227	263.495	130.207		18.8394	106.384	151.536	157.503	97.114	114.391	92.847	113.757	130.81	116.907	103.227	248.495	115.207		18.8394	0.64978	0.71451	0.748702	0.636035	0.641052	0.667957	0.61761	0.630632	0.698427	0.64442	0.776643	0.719567	0.678778	0.0515591	0.0148838
18.8606	121.557	166.986	170.205	110.636	133.664	108.478	129.97	146.475	131.222	120.518	262.039	130.319		18.8606	106.557	151.986	155.205	95.636	118.664	93.478	114.97	131.475	116.222	105.518	247.039	115.319		18.8606	0.650836	0.716632	0.737778	0.626355	0.664999	0.672496	0.624196	0.633838	0.694335	0.658723	0.772092	0.720267	0.681046	0.0473694	0.0136744
18.8818	117.041	166.573	171.5	110.373	132.513	107.106	126.301	149.038	132.794	120.788	258.163	129.142		18.8818	102.041	151.573	156.5	95.373	117.513	92.106	111.301	134.038	117.794	105.788	243.163	114.142		18.8818	0.623253	0.714685	0.743934	0.624632	0.658548	0.662626	0.604276	0.646194	0.703727	0.660408	0.759978	0.712915	0.676265	0.049977	0.0144271
18.903	122.098	164.59	168.606	114.694	133.862	105.484	128.559	149.853	129.999	120.329	257.908	128.454		18.903	107.098	149.59	153.606	99.694	118.862	90.484	113.559	134.853	114.999	105.329	242.908	113.454		18.903	0.654141	0.705334	0.730177	0.652932	0.666108	0.650957	0.616535	0.650123	0.687029	0.657543	0.759182	0.708618	0.678223	0.0405893	0.0117171
18.9243	121.585	165.635	176.476	111.146	134.34	105.331	130.775	145.751	131.187	126.144	259.729	123.92		18.9243	106.585	150.635	161.476	96.146	119.34	90.331	115.775	130.751	116.187	111.144	244.729	108.92		18.9243	0.651007	0.710262	0.767588	0.629695	0.668787	0.649856	0.628567	0.630348	0.694126	0.693844	0.764873	0.680299	0.680771	0.0483278	0.013951
18.9455	120.27	168.686	169.616	110.775	135.406	106.424	128.255	147.417	131.4	125.75	261.032	121.292		18.9455	105.27	153.686	154.616	95.775	120.406	91.424	113.255	132.417	116.4	110.75	246.032	106.292		18.9455	0.642975	0.724648	0.734978	0.627265	0.674761	0.657719	0.614885	0.638379	0.695399	0.691385	0.768945	0.663885	0.677935	0.0468561	0.0135262
18.9667	120.116	164.843	171.523	114.647	132.008	105.854	127.604	148.96	132.865	120.438	261.351	125.599		18.9667	105.116	149.843	156.523	99.647	117.008	90.854	112.604	133.96	117.865	105.438	246.351	110.599		18.9667	0.642035	0.706527	0.744043	0.652624	0.655718	0.653619	0.611351	0.645818	0.704151	0.658223	0.769942	0.690786	0.677903	0.0460962	0.0133068
18.9879	125.509	166.568	168.376	112.318	132.704	109.253	131.285	146.523	132.182	120.421	259.238	121.986		18.9879	110.509	151.568	153.376	97.318	117.704	94.253	116.285	131.523	117.182	105.421	244.238	106.986		18.9879	0.674974	0.714661	0.729084	0.637371	0.659619	0.678072	0.631335	0.634069	0.70007	0.658117	0.763338	0.66822	0.679078	0.040794	0.0117762
19.0091	125.386	167.752	169.201	114.204	131.187	106.747	130.682	142.155	132.77	121.831	262.521	122.234		19.0091	110.386	152.752	154.201	99.204	116.187	91.747	115.682	127.155	117.77	106.831	247.521	107.234		19.0091	0.674223	0.720244	0.733006	0.649723	0.651117	0.660043	0.628062	0.613011	0.703583	0.666919	0.773599	0.669769	0.678608	0.0460891	0.0133048
19.0303	121.218	164.231	169.767	111.137	135.976	108.032	128.791	146.639	133.709	123.049	260.722	128.449		19.0303	106.218	149.231	154.767	96.137	120.976	93.032	113.791	131.639	118.709	108.049	245.722	113.449		19.0303	0.648766	0.703642	0.735696	0.629636	0.677955	0.669288	0.617795	0.634629	0.709193	0.674523	0.767976	0.708587	0.681474	0.0453605	0.0130944
19.0516	121.835	167.717	175.279	115.467	130.447	109.264	128.186	143.558	134.745	118.027	267.116	124.523		19.0516	106.835	152.717	160.279	100.467	115.447	94.264	113.186	128.558	119.745	103.027	252.116	109.523		19.0516	0.652534	0.720079	0.761898	0.657995	0.64697	0.678151	0.61451	0.619775	0.715382	0.643172	0.78796	0.684066	0.681874	0.0546064	0.0157635
19.0728	121.681	165.78	169.332	110.594	130.726	108.516	127.85	147.747	131.522	119.951	261.752	126.166		19.0728	106.681	150.78	154.332	95.594	115.726	93.516	112.85	132.747	116.522	104.951	246.752	111.166		19.0728	0.651594	0.710945	0.733628	0.62608	0.648534	0.67277	0.612686	0.63997	0.696127	0.655183	0.771196	0.694328	0.676087	0.0466496	0.0134666
19.094	119.562	165.388	171.415	113.004	132.979	107.035	128.126	143.602	133.123	121.673	269.052	127.35		19.094	104.562	150.388	156.415	98.004	117.979	92.035	113.126	128.602	118.123	106.673	254.052	112.35		19.094	0.638651	0.709097	0.74353	0.641864	0.66116	0.662115	0.614185	0.619987	0.705692	0.665933	0.794011	0.701723	0.679829	0.0530718	0.0153205
19.1152	122.88	168.257	168.025	112.559	134.233	106.796	127.353	143.343	135.802	116.389	263.817	125.343		19.1152	107.88	153.257	153.025	97.559	119.233	91.796	112.353	128.343	120.802	101.389	248.817	110.343		19.1152	0.658917	0.722625	0.727415	0.638949	0.668187	0.660396	0.609988	0.618739	0.721697	0.632946	0.777649	0.689187	0.677225	0.0512156	0.0147847
19.1364	122.031	164.285	170.312	112.587	130.728	105.262	132.495	143.11	132.574	120.858	268.073	123.475		19.1364	107.031	149.285	155.312	97.587	115.728	90.262	117.495	128.11	117.574	105.858	253.073	108.475		19.1364	0.653731	0.703896	0.738287	0.639132	0.648545	0.64936	0.637905	0.617615	0.702412	0.660845	0.790951	0.67752	0.676683	0.0495197	0.0142951
19.1576	120.551	165.839	169.373	112.727	137.6	105.659	129.826	145.8	132.964	118.764	266.605	124.226		19.1576	105.551	150.839	154.373	97.727	122.6	90.659	114.826	130.8	117.964	103.764	251.605	109.226		19.1576	0.644692	0.711224	0.733823	0.640049	0.687056	0.652216	0.623414	0.630584	0.704742	0.647773	0.786363	0.682211	0.678679	0.0487368	0.0140691
19.1788	118.073	166.252	166.297	113.473	131.856	105.331	134.368	143.99	135.694	118.593	266.7	125.507		19.1788	103.073	151.252	151.297	98.473	116.856	90.331	119.368	128.99	120.694	103.593	251.7	110.507		19.1788	0.629556	0.713171	0.719201	0.644935	0.654866	0.649856	0.648074	0.621858	0.721052	0.646705	0.78666	0.690211	0.677179	0.0491104	0.014177
19.2001	117.2	168.905	167.806	111.093	132.751	103.416	128.969	146.034	135.344	120.94	265.532	128.048		19.2001	102.2	153.905	152.806	96.093	117.751	88.416	113.969	131.034	120.344	105.94	250.532	113.048		19.2001	0.624224	0.72568	0.726374	0.629348	0.659882	0.636079	0.618761	0.631712	0.718961	0.661357	0.783009	0.706082	0.676789	0.0533961	0.0154141
19.2213	119.154	169.441	171.392	111.705	132.234	107.084	134.219	149.016	138.097	116.198	264.089	128.191		19.2213	104.154	154.441	156.392	96.705	117.234	92.084	119.219	134.016	123.097	101.198	249.089	113.191		19.2213	0.636159	0.728208	0.743421	0.633356	0.656985	0.662467	0.647265	0.646088	0.735408	0.631754	0.7785	0.706975	0.683882	0.0514775	0.0148603
19.2425	121.877	165.381	167.361	110.543	133.44	105.434	133.603	145.445	135.722	120.928	263.69	124.557		19.2425	106.877	150.381	152.361	95.543	118.44	90.434	118.603	130.445	120.722	105.928	248.69	109.557		19.2425	0.652791	0.709064	0.724259	0.625746	0.663743	0.650597	0.64392	0.628872	0.721219	0.661282	0.777253	0.684278	0.678585	0.04576	0.0132098
19.2637	118.654	168.956	173.713	112.325	135.553	106.03	133.455	146.88	135.429	119.127	264.535	128.763		19.2637	103.654	153.956	158.713	97.325	120.553	91.03	118.455	131.88	120.429	104.127	249.535	113.763		19.2637	0.633105	0.725921	0.754454	0.637417	0.675585	0.654885	0.643117	0.63579	0.719469	0.650039	0.779893	0.710548	0.685018	0.0510746	0.014744
19.2849	119.481	166.442	169.016	113.482	129.795	107.246	131.385	147.128	135.337	121.675	263.309	124.193		19.2849	104.481	151.442	154.016	98.482	114.795	92.246	116.385	132.128	120.337	106.675	248.309	109.193		19.2849	0.638156	0.714067	0.732126	0.644994	0.643317	0.663633	0.631878	0.636986	0.718919	0.665945	0.776062	0.682004	0.679007	0.0462854	0.0133614
19.3061	123.116	167.977	172.407	109.731	131.611	108.082	133.129	148.75	135.613	119.425	253.669	124.829		19.3061	108.116	152.977	157.407	94.731	116.611	93.082	118.129	133.75	120.613	104.425	238.669	109.829		19.3061	0.660358	0.721305	0.748246	0.620427	0.653493	0.669647	0.641347	0.644806	0.720568	0.651899	0.745933	0.685977	0.680334	0.0433355	0.0125099
19.3274	122.805	166.499	173.545	109.486	129.999	106.193	130.064	148.547	136.387	120.86	262.282	128.126		19.3274	107.805	151.499	158.545	94.486	114.999	91.193	115.064	133.547	121.387	105.86	247.282	113.126		19.3274	0.658459	0.714336	0.753655	0.618823	0.64446	0.656057	0.624706	0.643827	0.725192	0.660858	0.772852	0.706569	0.68165	0.0510939	0.0147495
19.3486	122.054	165.085	169.043	109.215	129.022	107.562	129.884	146.728	135.508	120.265	258.016	122.514		19.3486	107.054	150.085	154.043	94.215	114.022	92.562	114.884	131.728	120.508	105.265	243.016	107.514		19.3486	0.653872	0.707668	0.732255	0.617048	0.638985	0.665906	0.623729	0.635058	0.719941	0.657143	0.759519	0.671518	0.673553	0.0459476	0.0132639
19.3698	121.241	167.705	174.441	108.028	129.222	102.4	129.328	145.531	137.573	117.663	263.349	126.271		19.3698	106.241	152.705	159.441	93.028	114.222	87.4	114.328	130.531	122.573	102.663	248.349	111.271		19.3698	0.648906	0.720022	0.757914	0.609274	0.640105	0.62877	0.620711	0.629287	0.732277	0.6409	0.776187	0.694983	0.674945	0.0582908	0.0168271
19.391	120.529	163.946	172.206	108.005	138.826	101.121	132.288	144.986	138.772	120.331	260.435	123.263		19.391	105.529	148.946	157.206	93.005	123.826	86.121	117.288	129.986	123.772	105.331	245.435	108.263		19.391	0.644557	0.702298	0.74729	0.609123	0.693927	0.619569	0.636781	0.62666	0.73944	0.657555	0.767079	0.676196	0.676706	0.0534006	0.0154154
19.4122	118.976	166.15	172.469	108.38	133.883	103.778	131.449	146.449	138.198	119.054	265.385	121.751		19.4122	103.976	151.15	157.469	93.38	118.883	88.778	116.449	131.449	123.198	104.054	250.385	106.751		19.4122	0.635072	0.71269	0.74854	0.611579	0.666226	0.638684	0.632226	0.633713	0.736011	0.649583	0.78255	0.666752	0.676135	0.0550729	0.0158982
19.4334	120.413	165.637	170.98	106.051	135.183	107.177	131.879	145.747	135.756	121.844	261.645	128.844		19.4334	105.413	150.637	155.98	91.051	120.183	92.177	116.879	130.747	120.756	106.844	246.645	113.844		19.4334	0.643849	0.710271	0.741462	0.596326	0.673511	0.663137	0.63456	0.630328	0.721422	0.667	0.770861	0.711054	0.680315	0.051314	0.0148131
19.4547	119.073	168.772	173.656	107.945	135.69	105.05	129.113	147.724	135.949	121.22	257.59	123.242		19.4547	104.073	153.772	158.656	92.945	120.69	90.05	114.113	132.724	120.949	106.22	242.59	108.242		19.4547	0.635664	0.725053	0.754183	0.60873	0.676352	0.647835	0.619543	0.639859	0.722575	0.663105	0.758188	0.676065	0.677263	0.0513713	0.0148296
19.4759	118.957	167.445	171.073	109.364	136.084	106.64	128.798	144.682	134.748	120.363	260.329	125.213		19.4759	103.957	152.445	156.073	94.364	121.084	91.64	113.798	129.682	119.748	105.363	245.329	110.213		19.4759	0.634956	0.718796	0.741904	0.618024	0.67856	0.659273	0.617833	0.625194	0.7154	0.657755	0.766748	0.688375	0.676902	0.0502137	0.0144955
19.4971	121.129	169.848	176.091	108.556	134.124	103.389	129.887	142.715	138.982	117.063	256.189	126.681		19.4971	106.129	154.848	161.091	93.556	119.124	88.389	114.887	127.715	123.982	102.063	241.189	111.681		19.4971	0.648222	0.730127	0.765758	0.612732	0.667576	0.635885	0.623745	0.615711	0.740695	0.637154	0.753809	0.697544	0.677413	0.0572037	0.0165133
19.5183	119.744	167.386	172.856	109.196	133.565	107.153	131.982	144.633	138.248	119.112	262.898	122.174		19.5183	104.744	152.386	157.856	94.196	118.565	92.153	116.982	129.633	123.248	104.112	247.898	107.174		19.5183	0.639763	0.718518	0.75038	0.616924	0.664444	0.662964	0.63512	0.624958	0.73631	0.649945	0.774777	0.669394	0.678625	0.0528784	0.0152647
19.5395	116.383	170.019	171.93	109.117	133.039	105.153	130.429	145.446	136.68	117.595	255.861	125.073		19.5395	101.383	155.019	156.93	94.117	118.039	90.153	115.429	130.446	121.68	102.595	240.861	110.073		19.5395	0.619234	0.730933	0.745978	0.616406	0.661496	0.648576	0.626688	0.628877	0.726942	0.640475	0.752784	0.687501	0.673824	0.0523375	0.0151085
19.5607	119.24	168.327	170.213	110.371	128.846	107.528	128.785	144.306	133.982	118.457	261.788	123.455		19.5607	104.24	153.327	155.213	95.371	113.846	92.528	113.785	129.306	118.982	103.457	246.788	108.455		19.5607	0.636684	0.722955	0.737816	0.624619	0.637998	0.665662	0.617762	0.623381	0.710824	0.645856	0.771308	0.677395	0.672688	0.0513441	0.0148218
19.582	117.138	167.158	169.321	110.149	129.222	109.085	131.675	146.058	135.063	119.813	264.167	123.709		19.582	102.138	152.158	154.321	95.149	114.222	94.085	116.675	131.058	120.063	104.813	249.167	108.709		19.582	0.623846	0.717443	0.733576	0.623165	0.640105	0.676863	0.633453	0.631828	0.717282	0.654321	0.778743	0.678981	0.675801	0.0507521	0.0146509
19.6032	117.685	164.622	170.586	110.803	133.281	107.231	130.272	136.95	134.078	121.464	260.448	129.874		19.6032	102.685	149.622	155.586	95.803	118.281	92.231	115.272	121.95	119.078	106.464	245.448	114.874		19.6032	0.627187	0.705485	0.739589	0.627448	0.662852	0.663525	0.625836	0.587918	0.711397	0.664628	0.76712	0.717487	0.675039	0.0536416	0.015485
19.6244	117.592	162.62	171.889	116.844	132.902	105.668	128.646	144.805	131.146	120.884	261.296	125.576		19.6244	102.592	147.62	156.889	101.844	117.902	90.668	113.646	129.805	116.146	105.884	246.296	110.576		19.6244	0.626618	0.696046	0.745783	0.667013	0.660728	0.652281	0.617008	0.625787	0.693881	0.661007	0.76977	0.690642	0.675547	0.0468435	0.0135225
19.6456	119.788	164.628	172.973	110.375	132.885	107.479	126.234	143.927	133.72	122.787	260.168	122.191		19.6456	104.788	149.628	157.973	95.375	117.885	92.479	111.234	128.927	118.72	107.787	245.168	107.191		19.6456	0.640031	0.705514	0.750936	0.624645	0.660633	0.665309	0.603913	0.621554	0.709259	0.672887	0.766245	0.6695	0.674202	0.0506255	0.0146143
19.6668	117.12	168.1	172.678	109.538	133.586	108.38	130.994	147.993	136.75	121.692	262.554	124.459		19.6668	102.12	153.1	157.678	94.538	118.586	93.38	115.994	132.993	121.75	106.692	247.554	109.459		19.6668	0.623736	0.721885	0.749534	0.619163	0.664561	0.671791	0.629756	0.641156	0.727361	0.666052	0.773702	0.683666	0.68103	0.0513575	0.0148256
19.688	117.359	163.757	179.312	110.828	132.841	107.074	127.318	143.679	136.466	121.558	256.406	127.377		19.688	102.359	148.757	164.312	95.828	117.841	92.074	112.318	128.679	121.466	106.558	241.406	112.377		19.688	0.625195	0.701407	0.781069	0.627612	0.660386	0.662396	0.609798	0.620359	0.725664	0.665215	0.754487	0.701891	0.677957	0.0554998	0.0160214
19.7092	118.762	166.153	175.835	110.131	133.434	102.977	132.486	147.331	134.208	120.94	255.107	127.269		19.7092	103.762	151.153	160.835	95.131	118.434	87.977	117.486	132.331	119.208	105.94	240.107	112.269		19.7092	0.633765	0.712704	0.764541	0.623047	0.66371	0.632921	0.637856	0.637965	0.712174	0.661357	0.750427	0.701217	0.67764	0.0489424	0.0141285
19.7305	116.096	165.153	172.895	113.999	129.265	106.774	129.892	147.502	135.849	119.567	256.849	127.271		19.7305	101.096	150.153	157.895	98.999	114.265	91.774	114.892	132.502	120.849	104.567	241.849	112.271		19.7305	0.617481	0.707989	0.750565	0.64838	0.640346	0.660237	0.623773	0.638789	0.721978	0.652786	0.755872	0.701229	0.676619	0.0486797	0.0140526
19.7517	117.88	167.439	173.515	112.269	132.358	108.093	130.497	147.9	136.324	122.754	253.64	126.312		19.7517	102.88	152.439	158.515	97.269	117.358	93.093	115.497	132.9	121.324	107.754	238.64	111.312		19.7517	0.628378	0.718768	0.753512	0.63705	0.65768	0.669726	0.627057	0.640708	0.724816	0.672681	0.745842	0.695239	0.680955	0.0457122	0.013196
19.7729	116.989	165.256	169.645	111.385	137.127	103.926	128.259	143.435	135.34	121.327	259.93	124.545		19.7729	101.989	150.256	154.645	96.385	122.127	88.926	113.259	128.435	120.34	106.327	244.93	109.545		19.7729	0.622935	0.708475	0.735116	0.63126	0.684405	0.639748	0.614907	0.619182	0.718937	0.663773	0.765501	0.684203	0.674037	0.0502149	0.0144958
19.7941	119.444	164.646	172.069	111.048	135.111	105.198	126.96	145.54	132.468	120.351	262.946	125.173		19.7941	104.444	149.646	157.069	96.048	120.111	90.198	111.96	130.54	117.468	105.351	247.946	110.173		19.7941	0.63793	0.705599	0.746639	0.629053	0.673108	0.648899	0.607854	0.62933	0.701779	0.65768	0.774927	0.688125	0.675077	0.0504593	0.0145663
19.8153	117.247	166.123	177.164	112.228	133.102	102.281	128.593	146.079	134.479	118.73	265.914	124.783		19.8153	102.247	151.123	162.164	97.228	118.102	87.281	113.593	131.079	119.479	103.73	250.914	109.783		19.8153	0.624511	0.712563	0.770858	0.636781	0.661849	0.627914	0.61672	0.631929	0.713793	0.647561	0.784203	0.685689	0.676198	0.0576285	0.0166359
19.8365	117.746	163.055	172.128	113.04	134.614	103.436	131.573	150.578	133.942	119.18	265.257	123.627		19.8365	102.746	148.055	157.128	98.04	119.614	88.436	116.573	135.578	118.942	104.18	250.257	108.627		19.8365	0.627559	0.698097	0.746919	0.642099	0.670322	0.636223	0.632899	0.653618	0.710585	0.65037	0.78215	0.678469	0.677443	0.0487	0.0140585
19.8578	117.459	164.061	170.113	113.132	137.265	101.992	126.421	146.82	133.931	122.046	263.263	124.737		19.8578	102.459	149.061	155.113	98.132	122.265	86.992	111.421	131.82	118.931	107.046	248.263	109.737		19.8578	0.625806	0.70284	0.737341	0.642702	0.685179	0.625835	0.604928	0.635501	0.710519	0.668261	0.775918	0.685402	0.675019	0.051093	0.0147493
19.879	116.602	167.049	169.351	112.83	136.24	104.211	131.213	144.029	135.732	119.602	262.053	128.061		19.879	101.602	152.049	154.351	97.83	121.24	89.211	116.213	129.029	120.732	104.602	247.053	113.061		19.879	0.620572	0.716929	0.733719	0.640724	0.679435	0.641799	0.630945	0.622046	0.721279	0.653004	0.772136	0.706163	0.678229	0.050558	0.0145948
19.9002	116.591	164.92	169.333	113.198	133.712	107.072	129.887	146.165	136.01	122.059	258.945	131.339		19.9002	101.591	149.92	154.333	98.198	118.712	92.072	114.887	131.165	121.01	107.059	243.945	116.339		19.9002	0.620504	0.70689	0.733633	0.643134	0.665268	0.662381	0.623745	0.632343	0.72294	0.668343	0.762423	0.726637	0.680687	0.0480569	0.0138728
19.9214	120.263	162.039	171.485	113.955	131.921	106.789	130.09	146.939	136.299	121.535	259.194	127.994		19.9214	105.263	147.039	156.485	98.955	116.921	91.789	115.09	131.939	121.299	106.535	244.194	112.994		19.9214	0.642933	0.693306	0.743863	0.648092	0.655231	0.660345	0.624848	0.636075	0.724666	0.665071	0.763201	0.705745	0.680281	0.045147	0.0130328
19.9426	119.088	165.183	170.702	113.916	136.139	104.689	129.994	146.583	137.123	119.7	261.769	128.183		19.9426	104.088	150.183	155.702	98.916	121.139	89.689	114.994	131.583	122.123	104.7	246.769	113.183		19.9426	0.635756	0.708131	0.740141	0.647837	0.678869	0.645237	0.624326	0.634359	0.729589	0.653616	0.771249	0.706925	0.681336	0.0485964	0.0140286
19.9638	116.66	161.78	168.855	114.356	135.998	106.065	131.228	146.826	136.402	121.129	263.933	122.374		19.9638	101.66	146.78	153.855	99.356	120.998	91.065	116.228	131.826	121.402	106.129	248.933	107.374		19.9638	0.620926	0.692085	0.731361	0.650718	0.678078	0.655137	0.631026	0.63553	0.725282	0.662537	0.778012	0.670643	0.677611	0.0468167	0.0135148
19.9851	117.265	160.838	171.009	114.261	137.58	105.508	126.719	148.244	131.936	123.39	257.738	128.557		19.9851	102.265	145.838	156.009	99.261	122.58	90.508	111.719	133.244	116.936	108.39	242.738	113.557		19.9851	0.624621	0.687643	0.7416	0.650096	0.686944	0.651129	0.606546	0.642366	0.698601	0.676652	0.75865	0.709261	0.677843	0.0455781	0.0131573
20.0063	115.4	162.495	170.722	112.041	133.102	107.54	132.826	146.025	136.675	123.213	263.495	126.778		20.0063	100.4	147.495	155.722	97.041	118.102	92.54	117.826	131.025	121.675	108.213	248.495	111.778		20.0063	0.61323	0.695456	0.740236	0.635557	0.661849	0.665748	0.639702	0.631669	0.726913	0.675547	0.776643	0.69815	0.680058	0.0492517	0.0142177
20.0275	119.032	164.085	169.93	113.476	134.59	104.07	130.129	147.468	136.64	117.021	260.267	127.412		20.0275	104.032	149.085	154.93	98.476	119.59	89.07	115.129	132.468	121.64	102.021	245.267	112.412		20.0275	0.635414	0.702953	0.736471	0.644955	0.670188	0.640784	0.625059	0.638625	0.726703	0.636892	0.766554	0.70211	0.677226	0.0478863	0.0138236
20.0487	116.14	164.382	168.888	113.15	136.606	101.901	130.516	145.115	135.948	121.289	256.275	125.569		20.0487	101.14	149.382	153.888	98.15	121.606	86.901	115.516	130.115	120.948	106.289	241.275	110.569		20.0487	0.61775	0.704354	0.731518	0.64282	0.681486	0.62518	0.62716	0.627281	0.722569	0.663536	0.754078	0.690599	0.674028	0.047038	0.0135787
20.0699	119.003	167.415	171.264	110.565	132.776	106.173	129.179	146.859	132.765	120.23	256.355	131.131		20.0699	104.003	152.415	156.264	95.565	117.776	91.173	114.179	131.859	117.765	105.23	241.355	116.131		20.0699	0.635237	0.718655	0.742812	0.62589	0.660022	0.655914	0.619902	0.635689	0.703553	0.656925	0.754328	0.725338	0.677855	0.0481833	0.0139093
20.0911	118.283	166.739	167.192	113.517	134.69	105.638	128.008	145.654	131.45	122.639	256.878	127.48		20.0911	103.283	151.739	152.192	98.517	119.69	90.638	113.008	130.654	116.45	107.639	241.878	112.48		20.0911	0.630839	0.715467	0.723456	0.645223	0.670748	0.652065	0.613544	0.62988	0.695697	0.671963	0.755962	0.702535	0.675615	0.0436153	0.0125907
20.1124	117.104	164.915	169.871	113.194	135.614	105.075	126.143	146.502	133.217	119.342	255.867	124.319		20.1124	102.104	149.915	154.871	98.194	120.614	90.075	111.143	131.502	118.217	104.342	240.867	109.319		20.1124	0.623638	0.706867	0.73619	0.643108	0.675926	0.648014	0.603419	0.633968	0.706254	0.651381	0.752803	0.682791	0.67203	0.0462152	0.0133412
20.1336	117.943	164.83	170.285	111.418	133.463	102.282	131.775	147.745	134.236	121.451	252.87	127.784		20.1336	102.943	149.83	155.285	96.418	118.463	87.282	116.775	132.745	119.236	106.451	237.87	112.784		20.1336	0.628762	0.706466	0.738158	0.631476	0.663872	0.627921	0.633996	0.639961	0.712341	0.664547	0.743436	0.704433	0.674614	0.0440169	0.0127066
20.1548	118.243	166.055	174.387	109.892	129.689	105.567	130.055	143.593	135.825	118.625	256.301	127.577		20.1548	103.243	151.055	159.387	94.892	114.689	90.567	115.055	128.593	120.825	103.625	241.301	112.577		20.1548	0.630595	0.712242	0.757658	0.621482	0.642722	0.651554	0.624658	0.619944	0.721834	0.646905	0.754159	0.70314	0.673908	0.0524308	0.0151355
20.176	115.18	163.881	169.505	110.972	131.666	104.518	127.76	145.337	133.343	116.448	257.734	127.053		20.176	100.18	148.881	154.505	95.972	116.666	89.518	112.76	130.337	118.343	101.448	242.734	112.053		20.176	0.611886	0.701991	0.734451	0.628555	0.653802	0.644007	0.612198	0.628352	0.707006	0.633315	0.758638	0.699868	0.667839	0.050176	0.0144846
20.1972	115.88	165.932	168.605	112.924	133.716	104.948	130.15	145.186	132.271	120.68	260.234	128.768		20.1972	100.88	150.932	153.605	97.924	118.716	89.948	115.15	130.186	117.271	105.68	245.234	113.768		20.1972	0.616162	0.711662	0.730172	0.64134	0.66529	0.647101	0.625173	0.627624	0.700602	0.659734	0.766451	0.710579	0.675158	0.0477687	0.0137896
20.2184	118.272	162.298	169.882	110.685	132.348	109.328	131.489	146.242	134.533	118.281	259.458	123.292		20.2184	103.272	147.298	154.882	95.685	117.348	94.328	116.489	131.242	119.533	103.281	244.458	108.292		20.2184	0.630772	0.694527	0.736243	0.626676	0.657624	0.678611	0.632443	0.632715	0.714116	0.644758	0.764026	0.676377	0.674074	0.0454266	0.0131135
20.2396	119.05	163.977	171.468	111.868	136.086	104.667	129.189	142.645	134.06	118.292	254.301	126.401		20.2396	104.05	148.977	156.468	96.868	121.086	89.667	114.189	127.645	119.06	103.292	239.301	111.401		20.2396	0.635524	0.702444	0.743782	0.634423	0.678572	0.645079	0.619956	0.615374	0.71129	0.644826	0.747908	0.695795	0.672914	0.0468124	0.0135136
20.2609	122.817	164.586	168.836	111.783	126.783	104.286	126.828	145.082	132.399	120.127	260.061	128.16		20.2609	107.817	149.586	153.836	96.783	111.783	89.286	111.828	130.082	117.399	105.127	245.061	113.16		20.2609	0.658532	0.705316	0.731271	0.633867	0.626437	0.642338	0.607138	0.627122	0.701367	0.656282	0.76591	0.706782	0.671863	0.0491506	0.0141886
20.2821	119.113	167.536	169.346	113.187	134.454	108.533	131.055	144.536	134.317	124.302	261.003	127.906		20.2821	104.113	152.536	154.346	98.187	119.454	93.533	116.055	129.536	119.317	109.302	246.003	112.906		20.2821	0.635909	0.719225	0.733695	0.643062	0.669426	0.672892	0.630087	0.62449	0.712825	0.682345	0.768855	0.705195	0.683167	0.0456845	0.013188
20.3033	117.983	167.601	173.473	112.942	136.421	108.718	128.822	142.957	131.888	120.301	254.922	127.48		20.3033	102.983	152.601	158.473	97.942	121.421	93.718	113.822	127.957	116.888	105.301	239.922	112.48		20.3033	0.629007	0.719532	0.753313	0.641457	0.680449	0.674223	0.617963	0.616878	0.698314	0.657368	0.749849	0.702535	0.678407	0.0477625	0.0137878
20.3245	115.993	168.426	169.823	110.453	138.426	106.19	130.114	147.08	131.845	118.945	254.364	124.271		20.3245	100.993	153.426	154.823	95.453	123.426	91.19	115.114	132.08	116.845	103.945	239.364	109.271		20.3245	0.616852	0.723422	0.735962	0.625156	0.691685	0.656036	0.624978	0.636755	0.698057	0.648903	0.748105	0.682492	0.674034	0.0458571	0.0132378
20.3457	115.316	165.753	169.115	113.451	131.712	106.859	130.647	146.885	133.653	118.656	257.6	123.842		20.3457	100.316	150.753	154.115	98.451	116.712	91.859	115.647	131.885	118.653	103.656	242.6	108.842		20.3457	0.612717	0.710818	0.732597	0.644791	0.654059	0.660849	0.627872	0.635815	0.708858	0.647099	0.758219	0.679812	0.672792	0.0453295	0.0130855
20.3669	119.03	166.531	170.514	109.844	130.466	106.041	133.045	145.421	135.033	122.561	252.628	125.375		20.3669	104.03	151.531	155.514	94.844	115.466	91.041	118.045	130.421	120.033	107.561	237.628	110.375		20.3669	0.635402	0.714487	0.739247	0.621168	0.647077	0.654964	0.640891	0.628757	0.717103	0.671476	0.742679	0.689387	0.67522	0.0439088	0.0126754
20.3882	117.346	168.989	172.279	110.291	130.216	105.729	130.176	143.745	134.484	124.407	252.401	124.212		20.3882	102.346	153.989	157.279	95.291	115.216	90.729	115.176	128.745	119.484	109.407	237.401	109.212		20.3882	0.625116	0.726076	0.747637	0.624095	0.645676	0.652719	0.625315	0.620677	0.713823	0.683001	0.74197	0.682123	0.674019	0.0484637	0.0139903
20.4094	119.148	165.617	176.219	110.922	130.765	106.798	130.042	142.691	133.132	123.179	253.124	128.069		20.4094	104.148	150.617	161.219	95.922	115.765	91.798	115.042	127.691	118.132	108.179	238.124	113.069		20.4094	0.636122	0.710177	0.766366	0.628228	0.648752	0.66041	0.624587	0.615595	0.705746	0.675335	0.74423	0.706213	0.676813	0.0494786	0.0142832
20.4306	115.584	167.075	170.345	107.353	130.995	104.355	131.783	147.2	135.845	118.898	257.693	126.203		20.4306	100.584	152.075	155.345	92.353	115.995	89.355	116.783	132.2	120.845	103.898	242.693	111.203		20.4306	0.614354	0.717052	0.738444	0.604853	0.650041	0.642835	0.634039	0.637333	0.721954	0.648609	0.75851	0.694559	0.671882	0.0515989	0.0148953
20.4518	117.911	166.673	173.885	110.766	132.47	104.852	129.123	146.443	132.616	121.672	260.79	125.48		20.4518	102.911	151.673	158.885	95.766	117.47	89.852	114.123	131.443	117.616	106.672	245.79	110.48		20.4518	0.628567	0.715156	0.755271	0.627206	0.658307	0.64641	0.619598	0.633684	0.702663	0.665927	0.768189	0.690043	0.675918	0.0505575	0.0145947
20.473	118.209	164.472	173.153	110.955	137.906	103.424	131.019	144.046	134.508	122.304	258.939	124.63		20.473	103.209	149.472	158.153	95.955	122.906	88.424	116.019	129.046	119.508	107.304	243.939	109.63		20.473	0.630387	0.704778	0.751792	0.628444	0.688771	0.636137	0.629891	0.622128	0.713966	0.669872	0.762404	0.684734	0.676942	0.0492723	0.0142237
20.4942	117.459	167.147	176.624	110.809	135.432	106.3	131.399	143.951	132.632	120.591	257.381	127.004		20.4942	102.459	152.147	161.624	95.809	120.432	91.3	116.399	128.951	117.632	105.591	242.381	112.004		20.4942	0.625806	0.717391	0.768291	0.627488	0.674907	0.656827	0.631954	0.62167	0.702759	0.659178	0.757534	0.699562	0.678614	0.050887	0.0146898
20.5155	115.496	162.435	181.531	112.394	129.903	105.99	130.162	145.655	134.649	123.238	256.64	126.348		20.5155	100.496	147.435	166.531	97.394	114.903	90.99	115.162	130.655	119.649	108.238	241.64	111.348		20.5155	0.613816	0.695173	0.791617	0.637868	0.643922	0.654597	0.625238	0.629885	0.714809	0.675703	0.755219	0.695464	0.677776	0.0550776	0.0158995
20.5367	114.859	165.447	179.382	111.972	134.352	105.378	127.204	143.861	133.813	124.307	255.285	123.905		20.5367	99.859	150.447	164.382	96.972	119.352	90.378	112.204	128.861	118.813	109.307	240.285	108.905		20.5367	0.609926	0.709375	0.781402	0.635105	0.668854	0.650194	0.609179	0.621236	0.709814	0.682376	0.750984	0.680206	0.675721	0.0549927	0.015875
20.5579	117.445	165.888	176.155	113.883	135.418	102.639	130.759	144.178	136.29	122.99	260.486	125.175		20.5579	102.445	150.888	161.155	98.883	120.418	87.639	115.759	129.178	121.29	107.99	245.486	110.175		20.5579	0.625721	0.711455	0.766062	0.64762	0.674828	0.630489	0.62848	0.622764	0.724612	0.674155	0.767239	0.688138	0.68013	0.0526568	0.0152007
20.5791	114.066	163.271	177.186	111.075	134.494	103.925	128.08	143.918	134.44	125.005	262.315	125.541		20.5791	99.066	148.271	162.186	96.075	119.494	88.925	113.08	128.918	119.44	110.005	247.315	110.541		20.5791	0.605082	0.699115	0.770963	0.62923	0.66965	0.639741	0.613935	0.621511	0.71356	0.686734	0.772955	0.690424	0.676075	0.0572709	0.0165327
20.6003	116.368	164.829	175.885	111.446	130.623	102.858	127.573	144.887	132.259	120.072	259.185	124.609		20.6003	101.368	149.829	160.885	96.446	115.623	87.858	112.573	129.887	117.259	105.072	244.185	109.609		20.6003	0.619142	0.706461	0.764778	0.63166	0.647957	0.632065	0.611182	0.626182	0.70053	0.655938	0.763173	0.684603	0.670306	0.0536796	0.015496
20.6215	120.024	162.287	174.724	110.797	126.963	104.115	128.42	143.758	136.713	122.233	261.272	127.579		20.6215	105.024	147.287	159.724	95.797	111.963	89.115	113.42	128.758	121.713	107.233	246.272	112.579		20.6215	0.641473	0.694476	0.75926	0.627409	0.627446	0.641108	0.615781	0.620739	0.72714	0.669429	0.769695	0.703153	0.674759	0.0549692	0.0158683
20.6428	116.307	166.184	174.57	110.132	131.83	104.683	126.392	143.268	136.046	119.263	262.71	128.991		20.6428	101.307	151.184	159.57	95.132	116.83	89.683	111.392	128.268	121.046	104.263	247.71	113.991		20.6428	0.61877	0.71285	0.758528	0.623054	0.654721	0.645194	0.60477	0.618377	0.723155	0.650888	0.77419	0.711972	0.674706	0.0586302	0.0169251
20.664	116.709	167.47	171.937	111.002	133.543	103.167	129.209	147.176	133.81	117.386	263.971	126.469		20.664	101.709	152.47	156.937	96.002	118.543	88.167	114.209	132.176	118.81	102.386	248.971	111.469		20.664	0.621225	0.718914	0.746011	0.628752	0.66432	0.634288	0.620064	0.637217	0.709796	0.63917	0.778131	0.69622	0.674509	0.0537643	0.0155204
20.6852	118.401	167.218	171.866	112.147	137.367	105.384	131.526	144.85	133.986	117.909	261.624	127.391		20.6852	103.401	152.218	156.866	97.147	122.367	90.384	116.526	129.85	118.986	102.909	246.624	112.391		20.6852	0.63156	0.717726	0.745674	0.636251	0.68575	0.650237	0.632644	0.626004	0.710848	0.642435	0.770795	0.701979	0.679325	0.049688	0.0143437
20.7064	117.846	166.021	170.693	113.884	133.867	103.262	133.144	143.445	135.012	118.395	263.243	128.942		20.7064	102.846	151.021	155.693	98.884	118.867	88.262	118.144	128.445	120.012	103.395	248.243	113.942		20.7064	0.62817	0.712082	0.740098	0.647627	0.666136	0.634971	0.641428	0.61923	0.716977	0.645469	0.775855	0.711666	0.678309	0.0508941	0.0146919
20.7276	119.905	166.087	172.376	114.126	129.565	105.875	127.201	145.775	134.827	120.421	259.961	124.22		20.7276	104.905	151.087	157.376	99.126	114.565	90.875	112.201	130.775	119.827	105.421	244.961	109.22		20.7276	0.640746	0.712393	0.748098	0.649212	0.642028	0.65377	0.609163	0.630463	0.715872	0.658117	0.765598	0.682173	0.675636	0.0492176	0.0142079
20.7488	119.824	167.047	175.411	110.309	132.631	105.45	131.873	147.057	136.415	120.078	258.53	128.891		20.7488	104.824	152.047	160.411	95.309	117.631	90.45	116.873	132.057	121.415	105.078	243.53	113.891		20.7488	0.640251	0.71692	0.762525	0.624213	0.65921	0.650712	0.634528	0.636644	0.725359	0.655976	0.761126	0.711347	0.681568	0.0506972	0.014635
20.77	113.714	167.409	172.017	112.167	135.771	103.422	129.504	141.728	133.42	120.274	258.438	127.511		20.77	98.714	152.409	157.017	97.167	120.771	88.422	114.504	126.728	118.42	105.274	243.438	112.511		20.77	0.602932	0.718626	0.746392	0.636382	0.676806	0.636122	0.621666	0.610953	0.707466	0.657199	0.760838	0.702728	0.673176	0.0536101	0.0154759
20.7913	115.537	163.462	174.532	108.519	133.322	103.314	130.663	143.262	133.425	116.15	251.257	126.661		20.7913	100.537	148.462	159.532	93.519	118.322	88.314	115.663	128.262	118.425	101.15	236.257	111.661		20.7913	0.614067	0.700016	0.758347	0.61249	0.663082	0.635345	0.627959	0.618348	0.707496	0.631454	0.738395	0.697419	0.667035	0.0513828	0.0148329
20.8125	112.512	164.472	174.088	110.824	136.238	103.932	130.786	142.462	131.486	116.879	258.111	125.605		20.8125	97.512	149.472	159.088	95.824	121.238	88.932	115.786	127.462	116.486	101.879	243.111	110.605		20.8125	0.595591	0.704778	0.756236	0.627586	0.679423	0.639791	0.628626	0.614491	0.695912	0.636005	0.759816	0.690824	0.66909	0.0540151	0.0155928
20.8337	117.779	163.624	175.244	111.025	131.398	105.971	132.65	140.88	135.439	122.03	263.363	124.043		20.8337	102.779	148.624	160.244	96.025	116.398	90.971	117.65	125.88	120.439	107.03	248.363	109.043		20.8337	0.627761	0.70078	0.761731	0.628902	0.6523	0.65446	0.638746	0.606865	0.719528	0.668162	0.776231	0.681068	0.676378	0.0537068	0.0155038
20.8549	118.246	162.901	177.247	111.191	133.174	103.765	131.713	145.459	134.181	118.404	262.133	127.372		20.8549	103.246	147.901	162.247	96.191	118.174	88.765	116.713	130.459	119.181	103.404	247.133	112.372		20.8549	0.630613	0.697371	0.771253	0.62999	0.662253	0.63859	0.633659	0.62894	0.712013	0.645525	0.772386	0.70186	0.677038	0.0534912	0.0154416
20.8761	119.563	160.535	175.739	112.396	132.889	104.27	131.521	140.925	134.228	120.513	264.25	130.094		20.8761	104.563	145.535	160.739	97.396	117.889	89.27	116.521	125.925	119.228	105.513	249.25	115.094		20.8761	0.638657	0.686215	0.764084	0.637882	0.660655	0.642223	0.632617	0.607082	0.712294	0.658691	0.779003	0.718861	0.678189	0.0545435	0.0157453
20.8973	121.254	165.689	175.826	110.676	133.346	105.471	130.272	140.941	133.552	116.028	264.117	128.978		20.8973	106.254	150.689	160.826	95.676	118.346	90.471	115.272	125.941	118.552	101.028	249.117	113.978		20.8973	0.648985	0.710516	0.764498	0.626617	0.663216	0.650863	0.625836	0.607159	0.708255	0.630693	0.778587	0.711891	0.67726	0.0565115	0.0163135
20.9186	119.356	164.467	171.223	111.025	135.487	104.193	127.818	142.586	134.822	114.55	260.805	124.201		20.9186	104.356	149.467	156.223	96.025	120.487	89.193	112.818	127.586	119.822	99.55	245.805	109.201		20.9186	0.637393	0.704755	0.742617	0.628902	0.675215	0.641669	0.612512	0.615089	0.715842	0.621466	0.768236	0.682054	0.670479	0.0527715	0.0152338
20.9398	120.673	161.626	173.22	112.209	133.674	104.201	127.417	143.244	130.802	116.96	262.625	127.756		20.9398	105.673	146.626	158.22	97.209	118.674	89.201	112.417	128.244	115.802	101.96	247.625	112.756		20.9398	0.645437	0.691359	0.75211	0.636657	0.665055	0.641727	0.610335	0.618261	0.691826	0.636511	0.773924	0.704258	0.672288	0.0517712	0.0149451
20.961	121.824	165.164	175.505	111.376	136.547	105.21	128.065	145.993	132.802	117.737	261.273	124.307		20.961	106.824	150.164	160.505	96.376	121.547	90.21	113.065	130.993	117.802	102.737	246.273	109.307		20.961	0.652467	0.708041	0.762972	0.631201	0.681155	0.648986	0.613853	0.631514	0.703774	0.641361	0.769698	0.682716	0.677312	0.0509225	0.0147001
20.9822	121.493	162.227	177.224	111.315	134.16	106.672	131.439	146.053	132.713	118.559	260.283	122.144		20.9822	106.493	147.227	162.224	96.315	119.16	91.672	116.439	131.053	117.713	103.559	245.283	107.144		20.9822	0.650445	0.694193	0.771143	0.630802	0.667778	0.659503	0.632172	0.631804	0.703243	0.646493	0.766604	0.669207	0.676949	0.0487577	0.0140751
21.0034	118.422	162	174.109	110.627	134.152	107.419	130.7	146.619	134.011	120.316	257.2	126.391		21.0034	103.422	147	159.109	95.627	119.152	92.419	115.7	131.619	119.011	105.316	242.2	111.391		21.0034	0.631688	0.693122	0.756336	0.626296	0.667733	0.664878	0.628159	0.634532	0.710997	0.657462	0.756969	0.695733	0.676992	0.0465964	0.0134512
21.0246	120.774	162.073	176.063	107.568	133.084	105.382	130.51	142.787	136.777	119.298	258.852	126.004		21.0246	105.774	147.073	161.063	92.568	118.084	90.382	115.51	127.787	121.777	104.298	243.852	111.004		21.0246	0.646054	0.693467	0.765625	0.606261	0.661748	0.650223	0.627128	0.616058	0.727522	0.651106	0.762132	0.693316	0.675053	0.0538761	0.0155527
21.0459	118.513	162.999	171.917	109.386	135.298	106.957	127.699	147.036	133.816	119.513	256.733	125.584		21.0459	103.513	147.999	156.917	94.386	120.298	91.957	112.699	132.036	118.816	104.513	241.733	110.584		21.0459	0.632244	0.697833	0.745916	0.618168	0.674156	0.661554	0.611866	0.636543	0.709832	0.652449	0.755509	0.690692	0.673897	0.0473766	0.0136765
21.0671	122.841	164.094	169.831	106.399	134.581	104.948	129.743	147.864	137.126	116.257	261.401	125.176		21.0671	107.841	149.094	154.831	91.399	119.581	89.948	114.743	132.864	122.126	101.257	246.401	110.176		21.0671	0.658679	0.702996	0.736	0.598605	0.670137	0.647101	0.622964	0.640534	0.729607	0.632122	0.770098	0.688144	0.674749	0.0516467	0.0149091
21.0883	122.547	161.452	172.117	108.966	137.52	107.496	129.484	144.034	134.237	119.514	258.852	123.072		21.0883	107.547	146.452	157.117	93.966	122.52	92.496	114.484	129.034	119.237	104.514	243.852	108.072		21.0883	0.656883	0.690538	0.746867	0.615417	0.686608	0.665431	0.621557	0.62207	0.712347	0.652455	0.762132	0.675003	0.675609	0.0473471	0.0136679
21.1095	121.597	165.144	170.55	105.724	133.288	103.665	131.217	144.794	134.054	121.176	257.453	127.238		21.1095	106.597	150.144	155.55	90.724	118.288	88.665	116.217	129.794	119.054	106.176	242.453	112.238		21.1095	0.65108	0.707947	0.739418	0.594184	0.662891	0.637871	0.630966	0.625734	0.711254	0.66283	0.757759	0.701023	0.67358	0.0497214	0.0143533
21.1307	121.709	158.954	172.574	107.842	128.355	109.23	132.15	149.857	132.282	124.068	260.433	127.211		21.1307	106.709	143.954	157.574	92.842	113.355	94.23	117.15	134.857	117.282	109.068	245.433	112.211		21.1307	0.651765	0.67876	0.749039	0.608056	0.635247	0.677906	0.636032	0.650143	0.700668	0.680884	0.767073	0.700854	0.678036	0.0466821	0.013476
21.1519	119.189	163.143	171.37	107.911	133.547	109.05	129.66	144.542	132.48	122.844	264.836	125.719		21.1519	104.189	148.143	156.37	92.911	118.547	94.05	114.66	129.542	117.48	107.844	249.836	110.719		21.1519	0.636373	0.698512	0.743316	0.608508	0.664343	0.676611	0.622513	0.624519	0.701851	0.673243	0.780834	0.691536	0.676847	0.0510882	0.0147479
21.1732	117.128	159.712	174.572	109.85	132.759	109.065	129.973	146.313	128.906	120.187	264.847	124.65		21.1732	102.128	144.712	159.572	94.85	117.759	94.065	114.973	131.313	113.906	105.187	249.847	109.65		21.1732	0.623784	0.682334	0.758537	0.621207	0.659927	0.676719	0.624212	0.633057	0.680499	0.656656	0.780869	0.684859	0.673555	0.0511368	0.0147619
21.1944	121.457	162.889	171.625	110.125	135.072	104.4	130.154	145.89	131.905	117.401	269.643	121.612		21.1944	106.457	147.889	156.625	95.125	120.072	89.4	115.154	130.89	116.905	102.401	254.643	106.612		21.1944	0.650225	0.697314	0.744528	0.623008	0.672889	0.643158	0.625195	0.631018	0.698416	0.639264	0.795858	0.665884	0.673896	0.0527282	0.0152213
21.2156	122.487	162.906	170.267	108.61	132.09	106.93	128.999	148.358	131.727	121.818	272.142	125.752		21.2156	107.487	147.906	155.267	93.61	117.09	91.93	113.999	133.358	116.727	106.818	257.142	110.752		21.2156	0.656516	0.697394	0.738073	0.613086	0.656178	0.66136	0.618924	0.642916	0.697352	0.666838	0.803668	0.691742	0.678671	0.0527509	0.0152279

## Sheet: MRC5 Pol2-GFP siMock 3h
														average pre bleach														0
background	15														99.501	129.74	92.9484	95.2752	84.9954	94.4061	135.496	201.209	78.8555	146.124	85.2496	128.551
temps	1	2	3	4	5	6	7	8	9	10	11	12		temps	1	2	3	4	5	6	7	8	9	10	11	12		temps	1	2	3	4	5	6	7	8	9	10	11	12	moyenne	ecart	SEM
0	141.09	184.74	130.408	140.264	121.894	135.07	192.98	276.375	119.474	201.061	124.71	185.878		0	126.09	169.74	115.408	125.264	106.894	120.07	177.98	261.375	104.474	186.061	109.71	170.878		0	1.26722	1.3083	1.24163	1.31476	1.25764	1.27185	1.31354	1.29902	1.32488	1.27331	1.28693	1.32926	1.2907	0.0283781	0.00819205
0.021216	142.476	180.874	128.175	132.398	120.877	129.578	181.487	262.056	114.967	194.765	120.375	176.185		0.021216	127.476	165.874	113.175	117.398	105.877	114.578	166.487	247.056	99.967	179.765	105.375	161.185		0.021216	1.28115	1.27851	1.21761	1.2322	1.24568	1.21367	1.22872	1.22786	1.26772	1.23022	1.23608	1.25386	1.24277	0.0227994	0.00658163
0.042432	135.959	172.455	124.255	129.188	116.04	125.573	178.632	254.854	110.195	189.426	116.491	171.896		0.042432	120.959	157.455	109.255	114.188	101.04	110.573	163.632	239.854	95.195	174.426	101.491	156.896		0.042432	1.21566	1.21362	1.17544	1.19851	1.18877	1.17125	1.20765	1.19206	1.20721	1.19369	1.19052	1.2205	1.1979	0.0155491	0.00448864
0.063648	130.427	174.223	121.324	129.068	113.642	124.176	171.964	250.689	111.448	188.388	115.831	167.548		0.063648	115.427	159.223	106.324	114.068	98.642	109.176	156.964	235.689	96.448	173.388	100.831	152.548		0.063648	1.16006	1.22724	1.1439	1.19725	1.16056	1.15645	1.15844	1.17136	1.2231	1.18658	1.18277	1.18667	1.17953	0.0263757	0.00761401
0.084864	130.715	168.456	124.326	128.374	112.3	124.863	171.666	246.855	108.528	180.859	110.416	168.842		0.084864	115.715	153.456	109.326	113.374	97.3	109.863	156.666	231.855	93.528	165.859	95.416	153.842		0.084864	1.16295	1.18279	1.1762	1.18996	1.14477	1.16373	1.15624	1.15231	1.18607	1.13506	1.11925	1.19674	1.16384	0.0236305	0.00682154
0.10608	132.083	168.294	121.535	131.191	112.549	125.386	167.517	247.399	107.585	181.245	109.802	162.708		0.10608	117.083	153.294	106.535	116.191	97.549	110.386	152.517	232.399	92.585	166.245	94.802	147.708		0.10608	1.1767	1.18154	1.14617	1.21953	1.1477	1.16927	1.12562	1.15501	1.17411	1.1377	1.11205	1.14902	1.15787	0.0285781	0.0082498
0.127296	130.322	168.526	120.451	122.77	111.236	121.884	168.879	241.74	104.99	184.579	111.981	162.986		0.127296	115.322	153.526	105.451	107.77	96.236	106.884	153.879	226.74	89.99	169.579	96.981	147.986		0.127296	1.159	1.18333	1.13451	1.13114	1.13225	1.13217	1.13567	1.12689	1.1412	1.16051	1.13761	1.15118	1.14379	0.0166243	0.00479902
0.148512	128.403	165.296	116.09	125.083	109.998	122.698	169.256	240.557	106.231	184.861	112.812	164.294		0.148512	113.403	150.296	101.09	110.083	94.998	107.698	154.256	225.557	91.231	169.861	97.812	149.294		0.148512	1.13972	1.15844	1.08759	1.15542	1.11768	1.14079	1.13845	1.12101	1.15694	1.16244	1.14736	1.16136	1.1406	0.0223257	0.00644489
0.169728	126.481	163.402	121.115	122.843	112.598	119.734	167.005	239.107	105.887	181.725	108.038	162.442		0.169728	111.481	148.402	106.115	107.843	97.598	104.734	152.005	224.107	90.887	166.725	93.038	147.442		0.169728	1.1204	1.14384	1.14165	1.13191	1.14827	1.1094	1.12184	1.1138	1.15258	1.14098	1.09136	1.14695	1.13025	0.0188786	0.00544979
0.190944	130.109	166.345	116.601	127.387	109.206	120.761	164.657	239.76	104.491	182.251	109.589	164.371		0.190944	115.109	151.345	101.601	112.387	94.206	105.761	149.657	224.76	89.491	167.251	94.589	149.371		0.190944	1.15686	1.16652	1.09309	1.1796	1.10837	1.12028	1.10451	1.11705	1.13487	1.14458	1.10955	1.16196	1.1331	0.0283142	0.0081736
0.21216	125.373	165.15	116.728	126.097	111.194	120.415	167.072	242.615	106.051	177.624	106.396	161.613		0.21216	110.373	150.15	101.728	111.097	96.194	105.415	152.072	227.615	91.051	162.624	91.396	146.613		0.21216	1.10927	1.15731	1.09446	1.16606	1.13175	1.11661	1.12233	1.13124	1.15466	1.11292	1.0721	1.1405	1.12577	0.0271863	0.00784801
0.233376	126.59	166.653	119.74	124.433	108.248	119.086	171.374	242.314	103.862	182.495	107.646	161.194		0.233376	111.59	151.653	104.74	109.433	93.248	104.086	156.374	227.314	88.862	167.495	92.646	146.194		0.233376	1.1215	1.1689	1.12686	1.1486	1.09709	1.10253	1.15408	1.12974	1.1269	1.14625	1.08676	1.13724	1.12887	0.0243809	0.00703817
0.254592	126.713	161.235	115.412	126.762	109.728	119.722	169.878	243.98	103.624	175.622	106.697	159.879		0.254592	111.713	146.235	100.412	111.762	94.728	104.722	154.878	228.98	88.624	160.622	91.697	144.879		0.254592	1.12273	1.12714	1.0803	1.17304	1.11451	1.10927	1.14304	1.13802	1.12388	1.09922	1.07563	1.12702	1.11948	0.0268176	0.00774157
0.275808	126.397	163.602	115.499	125.598	109.653	117.791	165.823	240.249	104.443	175.482	108.206	163.64		0.275808	111.397	148.602	100.499	110.598	94.653	102.791	150.823	225.249	89.443	160.482	93.206	148.64		0.275808	1.11956	1.14538	1.08123	1.16083	1.11362	1.08882	1.11312	1.11948	1.13426	1.09826	1.09333	1.15627	1.11868	0.0262103	0.00756627
0.297024	124.516	162.747	118.071	120.828	110.079	120.736	168.695	238.547	104.119	176.731	107.464	162.733		0.297024	109.516	147.747	103.071	105.828	95.079	105.736	153.695	223.547	89.119	161.731	92.464	147.733		0.297024	1.10065	1.13879	1.10891	1.11076	1.11864	1.12001	1.13431	1.11102	1.13016	1.10681	1.08463	1.14922	1.11782	0.0179606	0.00518478
0.31824	126.458	162.534	117.568	122.752	109.716	121.254	167.432	242.456	103.069	177.949	105.008	160.133		0.31824	111.458	147.534	102.568	107.752	94.716	106.254	152.432	227.456	88.069	162.949	90.008	145.133		0.31824	1.12017	1.13715	1.10349	1.13096	1.11437	1.1255	1.12499	1.13045	1.11684	1.11514	1.05582	1.12899	1.11699	0.0213362	0.00615922
0.339456	128.971	163.519	117.317	121.144	110.809	119.268	166.365	236.607	102.877	176.959	108.793	164.938		0.339456	113.971	148.519	102.317	106.144	95.809	104.268	151.365	221.607	87.877	161.959	93.793	149.938		0.339456	1.14543	1.14474	1.10079	1.11408	1.12723	1.10446	1.11712	1.10138	1.11441	1.10837	1.10022	1.16637	1.12038	0.0213576	0.00616539
0.360672	126.147	163.486	115.773	119.392	108.414	118.171	167.697	235.468	102.776	177.216	106.734	159.396		0.360672	111.147	148.486	100.773	104.392	93.414	103.171	152.697	220.468	87.776	162.216	91.734	144.396		0.360672	1.11704	1.14449	1.08418	1.09569	1.09905	1.09284	1.12695	1.09572	1.11312	1.11013	1.07606	1.12326	1.10654	0.0195625	0.00564722
0.381888	122.467	161.936	114.75	121.613	113.264	116.738	165.889	236.981	100.273	176.499	107.487	162.011		0.381888	107.467	146.936	99.75	106.613	98.264	101.738	150.889	221.981	85.273	161.499	92.487	147.011		0.381888	1.08006	1.13254	1.07318	1.119	1.15611	1.07766	1.1136	1.10324	1.08138	1.10522	1.0849	1.1436	1.10587	0.0277465	0.00800973
0.403104	125.279	167.861	114.642	118.884	109.818	120.545	164.05	233.435	103.839	172.812	108.816	161.652		0.403104	110.279	152.861	99.642	103.884	94.818	105.545	149.05	218.435	88.839	157.812	93.816	146.652		0.403104	1.10832	1.17821	1.07201	1.09036	1.11557	1.11799	1.10003	1.08561	1.1266	1.07999	1.10049	1.14081	1.10967	0.0293681	0.00847785
0.42432	125.116	165.535	115.493	120.62	105.695	122.842	161.148	238.677	103.595	174.033	111.274	164.164		0.42432	110.116	150.535	100.493	105.62	90.695	107.842	146.148	223.677	88.595	159.033	96.274	149.164		0.42432	1.10668	1.16028	1.08117	1.10858	1.06706	1.14232	1.07861	1.11167	1.12351	1.08834	1.12932	1.16035	1.11316	0.0311723	0.00899867
0.445536	125.781	163.964	115.341	118.754	107.554	119.232	162.669	236.845	100.368	175.012	110.163	159.838		0.445536	110.781	148.964	100.341	103.754	92.554	104.232	147.669	221.845	85.368	160.012	95.163	144.838		0.445536	1.11337	1.14817	1.07953	1.08899	1.08893	1.10408	1.08984	1.10256	1.08259	1.09504	1.11629	1.1267	1.10301	0.0201927	0.00582913
0.466752	125.358	164.428	115.623	120.662	106.215	120.745	164.91	237.827	103.499	172.211	109.423	154.729		0.466752	110.358	149.428	100.623	105.662	91.215	105.745	149.91	222.827	88.499	157.211	94.423	139.729		0.466752	1.10911	1.15175	1.08257	1.10902	1.07318	1.12011	1.10638	1.10744	1.12229	1.07587	1.10761	1.08695	1.10436	0.022249	0.00642273
0.487968	124.548	165.759	116.49	116.63	109.001	117.82	167.42	230.704	102.541	173.401	108.282	157.493		0.487968	109.548	150.759	101.49	101.63	94.001	102.82	152.42	215.704	87.541	158.401	93.282	142.493		0.487968	1.10097	1.162	1.0919	1.0667	1.10595	1.08912	1.1249	1.07204	1.11014	1.08402	1.09422	1.10845	1.10087	0.02528	0.0072977
0.509184	125.766	166.098	116.105	118.785	109.882	119.274	168.144	231.918	102.919	177.053	109.137	157.143		0.509184	110.766	151.098	101.105	103.785	94.882	104.274	153.144	216.918	87.919	162.053	94.137	142.143		0.509184	1.11321	1.16462	1.08775	1.08932	1.11632	1.10453	1.13025	1.07807	1.11494	1.10901	1.10425	1.10573	1.10983	0.0223432	0.00644992
0.5304	125.418	163.379	117.087	117.611	110.44	117.649	169.013	237.774	102.954	175.858	105.625	155.536		0.5304	110.418	148.379	102.087	102.611	95.44	102.649	154.013	222.774	87.954	160.858	90.625	140.536		0.5304	1.10972	1.14366	1.09832	1.077	1.12288	1.08731	1.13666	1.10718	1.11538	1.10083	1.06306	1.09323	1.1046	0.0233677	0.00674569
0.551616	127.346	164.902	117.52	120.602	109.186	117.167	167.867	230.74	104.165	173.851	105.608	156.772		0.551616	112.346	149.902	102.52	105.602	94.186	102.167	152.867	215.74	89.165	158.851	90.608	141.772		0.551616	1.12909	1.1554	1.10298	1.10839	1.10813	1.08221	1.1282	1.07222	1.13074	1.0871	1.06286	1.10285	1.10585	0.0270245	0.0078013
0.572832	125.015	163.19	115.382	122.297	103.345	120.204	162.278	227.571	101.846	175.105	106.373	154.36		0.572832	110.015	148.19	100.382	107.297	88.345	105.204	147.278	212.571	86.846	160.105	91.373	139.36		0.572832	1.10567	1.1422	1.07998	1.12618	1.03941	1.11438	1.08695	1.05647	1.10133	1.09568	1.07183	1.08408	1.09201	0.0288328	0.00832332
0.594048	126.303	165.16	118.328	119.054	105.569	119.904	166.765	229.634	102.989	174.369	106.786	155.475		0.594048	111.303	150.16	103.328	104.054	90.569	104.904	151.765	214.634	87.989	159.369	91.786	140.475		0.594048	1.11861	1.15739	1.11167	1.09214	1.06557	1.1112	1.12007	1.06672	1.11583	1.09064	1.07667	1.09276	1.10161	0.0262193	0.00756885
0.615264	123.136	164.109	115.49	119.182	106.533	120.385	164.415	232.57	101.384	174.922	104.913	153.228		0.615264	108.136	149.109	100.49	104.182	91.533	105.385	149.415	217.57	86.384	159.922	89.913	138.228		0.615264	1.08678	1.14929	1.08114	1.09349	1.07692	1.11629	1.10272	1.08131	1.09547	1.09443	1.0547	1.07528	1.09232	0.0236711	0.00683327
0.63648	125.939	165.398	114.816	118.914	105.525	121.321	165.995	233.211	102.249	170.322	106.288	152.896		0.63648	110.939	150.398	99.816	103.914	90.525	106.321	150.995	218.211	87.249	155.322	91.288	137.896		0.63648	1.11495	1.15922	1.07389	1.09067	1.06506	1.12621	1.11439	1.0845	1.10644	1.06295	1.07083	1.07269	1.09515	0.0295164	0.00852065
0.657696	125.122	162.154	115.246	117.142	107.426	114.466	167.297	232.59	102.705	173.752	100.778	157.039		0.657696	110.122	147.154	100.246	102.142	92.426	99.466	152.297	217.59	87.705	158.752	85.778	142.039		0.657696	1.10674	1.13422	1.07851	1.07207	1.08742	1.0536	1.12399	1.08141	1.11222	1.08642	1.0062	1.10492	1.08731	0.0342656	0.00989164
0.678912	125.598	160.686	115.394	120.686	105.514	116.646	169.129	236.505	102.363	171.519	106.55	158.743		0.678912	110.598	145.686	100.394	105.686	90.514	101.646	154.129	221.505	87.363	156.519	91.55	143.743		0.678912	1.11153	1.1229	1.0801	1.10927	1.06493	1.07669	1.13752	1.10087	1.10789	1.07114	1.07391	1.11818	1.09791	0.0236931	0.0068396
0.700128	127.819	160.949	116.076	117.79	107.816	118.678	163.864	235.379	100.426	175.743	103.311	154.024		0.700128	112.819	145.949	101.076	102.79	92.816	103.678	148.864	220.379	85.426	160.743	88.311	139.024		0.700128	1.13385	1.12493	1.08744	1.07887	1.09201	1.09821	1.09866	1.09527	1.08332	1.10005	1.03591	1.08147	1.0925	0.0243389	0.00702604
0.721344	125.367	159.107	115.039	119.574	104.123	118.246	163.584	232.519	102.754	173.698	104.786	156.67		0.721344	110.367	144.107	100.039	104.574	89.123	103.246	148.584	217.519	87.754	158.698	89.786	141.67		0.721344	1.1092	1.11073	1.07629	1.0976	1.04856	1.09364	1.09659	1.08106	1.11285	1.08605	1.05321	1.10205	1.08899	0.0211529	0.00610632
0.74256	126.246	158.216	116.795	119.24	105.475	119.417	163.34	233.459	103.394	175.014	104.475	158.399		0.74256	111.246	143.216	101.795	104.24	90.475	104.417	148.34	218.459	88.394	160.014	89.475	143.399		0.74256	1.11804	1.10387	1.09518	1.09409	1.06447	1.10604	1.09479	1.08573	1.12096	1.09506	1.04957	1.1155	1.09527	0.0211229	0.00609767
0.763776	126.58	161.964	116.043	118.21	103.773	123.225	161.94	226.465	101.683	170.687	107.006	150.613		0.763776	111.58	146.964	101.043	103.21	88.773	108.225	146.94	211.465	86.683	155.687	92.006	135.613		0.763776	1.1214	1.13275	1.08709	1.08328	1.04444	1.14638	1.08446	1.05097	1.09926	1.06544	1.07925	1.05494	1.08747	0.0325183	0.00938721
0.784992	121.519	159.196	114.321	117.132	103.134	119.246	161.362	232.789	100.166	170.544	107.46	153.133		0.784992	106.519	144.196	99.321	102.132	88.134	104.246	146.362	217.789	85.166	155.544	92.46	138.133		0.784992	1.07053	1.11142	1.06856	1.07197	1.03693	1.10423	1.08019	1.0824	1.08003	1.06447	1.08458	1.07454	1.07749	0.0189177	0.00546108
0.806208	121.684	158.261	114.072	119.172	104.967	119.965	165.098	234.293	102.282	170.169	107.686	154.952		0.806208	106.684	143.261	99.072	104.172	89.967	104.965	150.098	219.293	87.282	155.169	92.686	139.952		0.806208	1.07219	1.10421	1.06588	1.09338	1.05849	1.11185	1.10777	1.08988	1.10686	1.0619	1.08723	1.08869	1.08736	0.0188234	0.00543384
0.827424	124.962	161.739	117.285	121.012	107.194	117.818	162.699	232.896	98.716	169.494	106.774	152.756		0.827424	109.962	146.739	102.285	106.012	92.194	102.818	147.699	217.896	83.716	154.494	91.774	137.756		0.827424	1.10513	1.13102	1.10045	1.11269	1.08469	1.0891	1.09006	1.08293	1.06164	1.05728	1.07653	1.07161	1.0886	0.0212896	0.00614578
0.84864	122.328	160.318	116.531	119.809	105.212	121.045	161.067	229.287	100.662	172.568	105.873	153.933		0.84864	107.328	145.318	101.531	104.809	90.212	106.045	146.067	214.287	85.662	157.568	90.873	138.933		0.84864	1.07866	1.12007	1.09234	1.10007	1.06137	1.12328	1.07802	1.065	1.08632	1.07832	1.06596	1.08076	1.08585	0.0200942	0.0058007
0.869856	122.901	156.498	117.347	115.475	101.674	117.764	162.836	230.957	99.259	172.146	102.854	154.929		0.869856	107.901	141.498	102.347	100.475	86.674	102.764	147.836	215.957	84.259	157.146	87.854	139.929		0.869856	1.08442	1.09062	1.10112	1.05458	1.01975	1.08853	1.09107	1.0733	1.06852	1.07543	1.03055	1.08851	1.0722	0.0252897	0.0073005
0.891072	122.845	158.931	115.438	119.927	104.845	116.737	162.76	232.067	102.13	175.237	107.163	157.863		0.891072	107.845	143.931	100.438	104.927	89.845	101.737	147.76	217.067	87.13	160.237	92.163	142.863		0.891072	1.08386	1.10938	1.08058	1.1013	1.05706	1.07765	1.09051	1.07881	1.10493	1.09658	1.0811	1.11133	1.08942	0.0159247	0.00459706
0.912288	124.068	158.45	114.563	115.929	103.733	118.674	160.04	225.196	102.226	173.333	108.069	158.36		0.912288	109.068	143.45	99.563	100.929	88.733	103.674	145.04	210.196	87.226	158.333	93.069	143.36		0.912288	1.09615	1.10567	1.07116	1.05934	1.04397	1.09817	1.07044	1.04467	1.10615	1.08355	1.09172	1.1152	1.08218	0.0241364	0.00696759
0.933504	124.858	155.987	117.765	118.086	103.451	115.173	161.363	227.865	99.795	176.361	105.628	153.908		0.933504	109.858	140.987	102.765	103.086	88.451	100.173	146.363	212.865	84.795	161.361	90.628	138.908		0.933504	1.10409	1.08669	1.10561	1.08198	1.04066	1.06109	1.0802	1.05793	1.07532	1.10427	1.06309	1.08057	1.07846	0.0203305	0.00586892
0.95472	122.896	154.62	112.733	119.261	105.711	115.447	159.866	231.825	99.894	176.946	104.867	154.133		0.95472	107.896	139.62	97.733	104.261	90.711	100.447	144.866	216.825	84.894	161.946	89.867	139.133		0.95472	1.08437	1.07615	1.05148	1.09431	1.06725	1.06399	1.06915	1.07761	1.07658	1.10828	1.05416	1.08232	1.07547	0.0160482	0.00463271
0.975936	123.758	162.414	113.844	120.326	104.195	116.945	158.583	228.299	97.726	172.739	103.731	153.266		0.975936	108.758	147.414	98.844	105.326	89.195	101.945	143.583	213.299	82.726	157.739	88.731	138.266		0.975936	1.09303	1.13622	1.06343	1.10549	1.04941	1.07986	1.05968	1.06009	1.04908	1.07949	1.04084	1.07557	1.07435	0.0271807	0.0078464
0.997152	121.566	159.204	117.995	117.051	103.08	116.898	162.137	225.893	102.767	175.904	105.706	151.89		0.997152	106.566	144.204	102.995	102.051	88.08	101.898	147.137	210.893	87.767	160.904	90.706	136.89		0.997152	1.071	1.11148	1.10809	1.07112	1.03629	1.07936	1.08591	1.04813	1.11301	1.10115	1.06401	1.06487	1.07953	0.0250824	0.00724066
1.01837	124.3	156.969	116.929	119.922	103.432	117.649	165.983	225.212	101.294	173.926	102.891	150.947		1.01837	109.3	141.969	101.929	104.922	88.432	102.649	150.983	210.212	86.294	158.926	87.891	135.947		1.01837	1.09848	1.09425	1.09662	1.10125	1.04043	1.08731	1.1143	1.04475	1.09433	1.08761	1.03098	1.05753	1.07899	0.0277473	0.00800997
1.03958	123.788	160.338	114.692	116.237	105.705	118.34	164.121	221.139	101.773	168.35	102.697	153.963		1.03958	108.788	145.338	99.692	101.237	90.705	103.34	149.121	206.139	86.773	153.35	87.697	138.963		1.03958	1.09334	1.12022	1.07255	1.06257	1.06718	1.09463	1.10055	1.0245	1.1004	1.04945	1.02871	1.08099	1.07459	0.0296436	0.00855737
1.0608	122.989	158.801	114.954	119.095	104.891	114.409	163.813	228.467	101.192	171.995	107.417	149.115		1.0608	107.989	143.801	99.954	104.095	89.891	99.409	148.813	213.467	86.192	156.995	92.417	134.115		1.0608	1.08531	1.10837	1.07537	1.09257	1.0576	1.05299	1.09828	1.06092	1.09304	1.0744	1.08408	1.04328	1.07718	0.0200299	0.00578214
1.08202	127.337	158.26	111.328	117.848	103.722	120.238	160.949	230.427	100.464	172.931	106.6	152.702		1.08202	112.337	143.26	96.328	102.848	88.722	105.238	145.949	215.427	85.464	157.931	91.6	137.702		1.08202	1.129	1.1042	1.03636	1.07948	1.04384	1.11474	1.07714	1.07066	1.0838	1.0808	1.07449	1.07119	1.08048	0.0263225	0.00759864
1.10323	124.642	157.493	112.898	119.435	105.508	120.509	162.346	223.561	100.455	166.242	103.576	152.663		1.10323	109.642	142.493	97.898	104.435	90.508	105.509	147.346	208.561	85.455	151.242	88.576	137.663		1.10323	1.10192	1.09829	1.05325	1.09614	1.06486	1.11761	1.08745	1.03654	1.08369	1.03503	1.03902	1.07088	1.07372	0.0281314	0.00812085
1.12445	121.068	158.099	114.979	116.38	102.958	114.994	159.243	225.925	100.564	174.914	102.384	149.587		1.12445	106.068	143.099	99.979	101.38	87.958	99.994	144.243	210.925	85.564	159.914	87.384	134.587		1.12445	1.066	1.10296	1.07564	1.06408	1.03486	1.05919	1.06455	1.04829	1.08507	1.09437	1.02504	1.04695	1.06392	0.0232623	0.00671524
1.14566	121.874	159.4	112.344	119.914	103.816	116.026	159.753	222.494	101.745	174.543	104.004	153.469		1.14566	106.874	144.4	97.344	104.914	88.816	101.026	144.753	207.494	86.745	159.543	89.004	138.469		1.14566	1.0741	1.11299	1.04729	1.10117	1.04495	1.07012	1.06832	1.03124	1.10005	1.09183	1.04404	1.07715	1.07194	0.0261896	0.0075603
1.16688	124.946	157.371	114.473	119.015	104.783	119.886	159.343	224.489	98.507	172.11	103.431	152.656		1.16688	109.946	142.371	99.473	104.015	89.783	104.886	144.343	209.489	83.507	157.11	88.431	137.656		1.16688	1.10497	1.09735	1.0702	1.09173	1.05633	1.11101	1.06529	1.04115	1.05899	1.07518	1.03732	1.07083	1.07336	0.0238325	0.00687984
1.1881	123.085	158.403	115.077	117.91	107.119	119.268	159.65	226.037	101.581	169.578	103.024	154.74		1.1881	108.085	143.403	100.077	102.91	92.119	104.268	144.65	211.037	86.581	154.578	88.024	139.74		1.1881	1.08627	1.10531	1.07669	1.08013	1.08381	1.10446	1.06756	1.04885	1.09797	1.05786	1.03254	1.08704	1.07737	0.0222816	0.00643215
1.20931	120.207	157.325	113.465	119.038	104.272	120.838	159.877	227.152	102.542	171.003	106.247	156.467		1.20931	105.207	142.325	98.465	104.038	89.272	105.838	144.877	212.152	87.542	156.003	91.247	141.467		1.20931	1.05735	1.097	1.05935	1.09197	1.05032	1.12109	1.06923	1.05439	1.11016	1.06761	1.07035	1.10047	1.07911	0.0238924	0.00689715
1.23053	120.919	153.708	114.072	112.337	108.987	117.891	163.89	227.75	99.749	173.81	107.576	152.992		1.23053	105.919	138.708	99.072	97.337	93.987	102.891	148.89	212.75	84.749	158.81	92.576	137.992		1.23053	1.0645	1.06912	1.06588	1.02164	1.10579	1.08988	1.09885	1.05736	1.07474	1.08682	1.08594	1.07344	1.0745	0.022122	0.00638608
1.25174	121.733	158.123	113.841	117.632	105.189	116.239	163.049	225.569	99.499	168.55	105.304	151.774		1.25174	106.733	143.123	98.841	102.632	90.189	101.239	148.049	210.569	84.499	153.55	90.304	136.774		1.25174	1.07268	1.10315	1.0634	1.07722	1.0611	1.07238	1.09264	1.04652	1.07157	1.05082	1.05929	1.06397	1.06956	0.0161518	0.00466261
1.27296	120.926	156.379	114.28	116.929	106.651	114.638	160.899	228.485	98.89	171.725	104.847	150.278		1.27296	105.926	141.379	99.28	101.929	91.651	99.638	145.899	213.485	83.89	156.725	89.847	135.278		1.27296	1.06457	1.08971	1.06812	1.06984	1.07831	1.05542	1.07678	1.06101	1.06384	1.07255	1.05393	1.05233	1.0672	0.0110802	0.00319858
1.29418	120.775	158.982	112.357	116.876	107.145	116.467	164.874	227.568	99.714	164.586	104.518	148.103		1.29418	105.775	143.982	97.357	101.876	92.145	101.467	149.874	212.568	84.714	149.586	89.518	133.103		1.29418	1.06305	1.10977	1.04743	1.06928	1.08412	1.07479	1.10611	1.05645	1.07429	1.02369	1.05007	1.03541	1.06621	0.0259955	0.00750425
1.31539	119.76	157.61	113.587	118.466	104.858	116.87	159.846	224.295	103.104	169.433	103.82	151.258		1.31539	104.76	142.61	98.587	103.466	89.858	101.87	144.846	209.295	88.104	154.433	88.82	136.258		1.31539	1.05285	1.09919	1.06066	1.08597	1.05721	1.07906	1.069	1.04019	1.11728	1.05686	1.04188	1.05995	1.06834	0.0231419	0.00668048
1.33661	121.908	155.863	112.884	117.809	105.342	116.276	164.66	230.804	100.457	171.03	105.783	147.627		1.33661	106.908	140.863	97.884	102.809	90.342	101.276	149.66	215.804	85.457	156.03	90.783	132.627		1.33661	1.07444	1.08573	1.0531	1.07907	1.0629	1.07277	1.10453	1.07254	1.08372	1.06779	1.06491	1.03171	1.0711	0.0179969	0.00519527
1.35782	119.543	157.736	112.982	112.995	105.11	117.558	165.652	221.709	97.957	173.147	102.212	153.68		1.35782	104.543	142.736	97.982	97.995	90.11	102.558	150.652	206.709	82.957	158.147	87.212	138.68		1.35782	1.05067	1.10017	1.05415	1.02855	1.06017	1.08635	1.11185	1.02734	1.05201	1.08228	1.02302	1.07879	1.06295	0.0291556	0.00841651
1.37904	121.637	159.721	114.128	114.681	104.853	117.237	161.674	229.767	100.996	165.996	101.033	151.574		1.37904	106.637	144.721	99.128	99.681	89.853	102.237	146.674	214.767	85.996	150.996	86.033	136.574		1.37904	1.07172	1.11547	1.06648	1.04624	1.05715	1.08295	1.0825	1.06738	1.09055	1.03334	1.00919	1.06241	1.06545	0.0276597	0.00798466
1.40026	123.617	157.258	111.443	115.979	107.001	115.776	161.361	234.618	100.917	170.082	100.763	149.974		1.40026	108.617	142.258	96.443	100.979	92.001	100.776	146.361	219.618	85.917	155.082	85.763	134.974		1.40026	1.09162	1.09648	1.0376	1.05987	1.08242	1.06747	1.08019	1.09149	1.08955	1.0613	1.00602	1.04996	1.06783	0.0268726	0.00775745
1.42147	122.6	157.408	112.78	114.948	106.748	117.683	159.798	226.654	97.719	172.763	103.373	150.044		1.42147	107.6	142.408	97.78	99.948	91.748	102.683	144.798	211.654	82.719	157.763	88.373	135.044		1.42147	1.0814	1.09764	1.05198	1.04905	1.07945	1.08767	1.06865	1.05191	1.04899	1.07965	1.03664	1.05051	1.06529	0.0194227	0.00560684
1.44269	119.934	156.718	109.553	115.266	105.8	117.534	159.96	227.324	98.004	171.134	105.405	152.266		1.44269	104.934	141.718	94.553	100.266	90.8	102.534	144.96	212.324	83.004	156.134	90.405	137.266		1.44269	1.0546	1.09232	1.01726	1.05238	1.06829	1.08609	1.06985	1.05524	1.05261	1.0685	1.06047	1.06779	1.06212	0.0189772	0.00547824
1.4639	118.303	155.241	116.578	117.531	104.841	119.596	159.833	227.907	98.448	169.96	106.234	149.971		1.4639	103.303	140.241	101.578	102.531	89.841	104.596	144.833	212.907	83.448	154.96	91.234	134.971		1.4639	1.03821	1.08094	1.09284	1.07616	1.05701	1.10794	1.06891	1.05814	1.05824	1.06047	1.0702	1.04994	1.06825	0.019151	0.00552841
1.48512	120.304	154.6	113.36	118.476	108.22	117.582	155.85	225.921	97.663	164.736	104.763	150.79		1.48512	105.304	139.6	98.36	103.476	93.22	102.582	140.85	210.921	82.663	149.736	89.763	135.79		1.48512	1.05832	1.07599	1.05822	1.08608	1.09676	1.0866	1.03951	1.04827	1.04828	1.02472	1.05294	1.05631	1.061	0.0213026	0.00614953
1.50634	120.813	157.842	113.642	118.574	103.771	116.515	161.01	224.667	97.913	170.342	103.761	154.679		1.50634	105.813	142.842	98.642	103.574	88.771	101.515	146.01	209.667	82.913	155.342	88.761	139.679		1.50634	1.06344	1.10098	1.06126	1.0871	1.04442	1.0753	1.07759	1.04204	1.05145	1.06308	1.04119	1.08656	1.0662	0.01958	0.00565225
1.52755	119.643	154.09	111.068	118.406	105.726	117.601	158.29	226.776	96.631	171.378	103.393	152.897		1.52755	104.643	139.09	96.068	103.406	90.726	102.601	143.29	211.776	81.631	156.378	88.393	137.897		1.52755	1.05168	1.07206	1.03356	1.08534	1.06742	1.0868	1.05752	1.05252	1.0352	1.07017	1.03687	1.0727	1.06015	0.0186015	0.00536978
1.54877	117.189	160.041	114.419	119.211	104.718	114.595	159.191	224.425	97.227	164.375	106.155	150.471		1.54877	102.189	145.041	99.419	104.211	89.718	99.595	144.191	209.425	82.227	149.375	91.155	135.471		1.54877	1.02701	1.11793	1.06961	1.09379	1.05556	1.05496	1.06417	1.04083	1.04276	1.02225	1.06927	1.05383	1.05933	0.0268825	0.00776031
1.56998	121.527	158.61	114.467	117.727	104.325	117.897	157.192	225.129	97.986	166.032	105.692	150.79		1.56998	106.527	143.61	99.467	102.727	89.325	102.897	142.192	210.129	82.986	151.032	90.692	135.79		1.56998	1.07061	1.1069	1.07013	1.07821	1.05094	1.08994	1.04942	1.04433	1.05238	1.03359	1.06384	1.05631	1.06388	0.0206392	0.00595803
1.5912	119.045	156.292	112.352	116.719	105.754	115.087	154.924	225.068	98.798	167.638	101.04	153.674		1.5912	104.045	141.292	97.352	101.719	90.754	100.087	139.924	210.068	83.798	152.638	86.04	138.674		1.5912	1.04567	1.08904	1.04738	1.06763	1.06775	1.06017	1.03268	1.04403	1.06268	1.04458	1.00927	1.07875	1.05414	0.0215001	0.00620655
1.61242	115.829	157.02	111.976	117.212	104.875	113.904	158.89	227.053	94.959	165.552	101.312	150.847		1.61242	100.829	142.02	96.976	102.212	89.875	98.904	143.89	212.053	79.959	150.552	86.312	135.847		1.61242	1.01335	1.09465	1.04333	1.07281	1.05741	1.04764	1.06195	1.05389	1.01399	1.0303	1.01246	1.05676	1.04655	0.0254341	0.00734219
1.63363	119.672	159.414	110.662	117.831	105.112	117.421	156.395	227.817	97.648	165.496	100.207	149.328		1.63363	104.672	144.414	95.662	102.831	90.112	102.421	141.395	212.817	82.648	150.496	85.207	134.328		1.63363	1.05197	1.1131	1.02919	1.07931	1.0602	1.0849	1.04353	1.05769	1.04809	1.02992	0.999501	1.04494	1.05353	0.0294389	0.00849827
1.65485	118.584	157.484	114.611	116.454	105.132	118.242	160.667	224.512	97.126	169.962	102.981	147.534		1.65485	103.584	142.484	99.611	101.454	90.132	103.242	145.667	209.512	82.126	154.962	87.981	132.534		1.65485	1.04103	1.09822	1.07168	1.06485	1.06043	1.09359	1.07506	1.04127	1.04147	1.06048	1.03204	1.03098	1.05926	0.0226593	0.00654117
1.67606	117.835	155.017	114.492	115.877	104.278	114.623	155.819	221.425	99.828	165.85	102.992	151.17		1.67606	102.835	140.017	99.492	100.877	89.278	99.623	140.819	206.425	84.828	150.85	87.992	136.17		1.67606	1.03351	1.07921	1.0704	1.0588	1.05039	1.05526	1.03928	1.02592	1.07574	1.03234	1.03217	1.05927	1.05102	0.0183565	0.00529906
1.69728	120.28	161.24	112.472	116.12	103.217	115.031	156.564	223.503	98.024	169.943	100.895	149.041		1.69728	105.28	146.24	97.472	101.12	88.217	100.031	141.564	208.503	83.024	154.943	85.895	134.041		1.69728	1.05808	1.12717	1.04867	1.06135	1.0379	1.05958	1.04478	1.03625	1.05286	1.06035	1.00757	1.04271	1.05311	0.0277308	0.00800519
1.7185	120.9	157.317	111.297	114.864	104.604	113.82	152.037	220.473	99.705	166.806	103.396	150.155		1.7185	105.9	142.317	96.297	99.864	89.604	98.82	137.037	205.473	84.705	151.806	88.396	135.155		1.7185	1.06431	1.09694	1.03603	1.04816	1.05422	1.04675	1.01137	1.02119	1.07418	1.03889	1.03691	1.05137	1.04836	0.0229744	0.00663215
1.73971	120.037	156.737	114.172	115.663	105.01	113.93	155.205	226.762	97.553	170.268	101.578	147.004		1.73971	105.037	141.737	99.172	100.663	90.01	98.93	140.205	211.762	82.553	155.268	86.578	132.004		1.73971	1.05564	1.09247	1.06696	1.05655	1.059	1.04792	1.03475	1.05245	1.04689	1.06258	1.01558	1.02686	1.05147	0.019889	0.00574146
1.76093	121.064	155.794	113.09	112.55	103.861	113.898	153.48	221.906	99.178	165.104	101.648	150.285		1.76093	106.064	140.794	98.09	97.55	88.861	98.898	138.48	206.906	84.178	150.104	86.648	135.285		1.76093	1.06596	1.0852	1.05532	1.02388	1.04548	1.04758	1.02202	1.02831	1.0675	1.02724	1.0164	1.05238	1.04477	0.0215624	0.00622454
1.78214	121.876	158.73	112.192	114.64	104.117	115.419	158.116	225.167	99.138	168.074	103.577	152.311		1.78214	106.876	143.73	97.192	99.64	89.117	100.419	143.116	210.167	84.138	153.074	88.577	137.311		1.78214	1.07412	1.10783	1.04566	1.04581	1.04849	1.06369	1.05624	1.04452	1.06699	1.04756	1.03903	1.06814	1.05901	0.0190487	0.0054989
1.80336	116.603	156.905	112.602	114.218	104.516	110.925	157.141	221.015	100.248	167.003	102.988	153.734		1.80336	101.603	141.905	97.602	99.218	89.516	95.925	142.141	206.015	85.248	152.003	87.988	138.734		1.80336	1.02113	1.09376	1.05007	1.04138	1.05319	1.01609	1.04904	1.02389	1.08107	1.04023	1.03212	1.07921	1.04843	0.0249908	0.00721422
1.82458	116.398	153.312	109.742	115.54	107.598	114.513	161.306	227.017	97.986	166.543	101.407	155.884		1.82458	101.398	138.312	94.742	100.54	92.598	99.513	146.306	212.017	82.986	151.543	86.407	140.884		1.82458	1.01907	1.06607	1.0193	1.05526	1.08945	1.05409	1.07978	1.05372	1.05238	1.03709	1.01358	1.09594	1.05298	0.0272398	0.00786346
1.84579	117.758	152.152	110.191	112.338	103.674	113.463	155.909	227.347	99.316	169.206	101.253	153.175		1.84579	102.758	137.152	95.191	97.338	88.674	98.463	140.909	212.347	84.316	154.206	86.253	138.175		1.84579	1.03273	1.05713	1.02413	1.02165	1.04328	1.04297	1.03995	1.05536	1.06925	1.05531	1.01177	1.07486	1.04403	0.0192997	0.00557135
1.86701	121.278	157.639	110.681	113.54	104.66	114.418	160.293	225.101	102.64	165.069	103.198	153.117		1.86701	106.278	142.639	95.681	98.54	89.66	99.418	145.293	210.101	87.64	150.069	88.198	138.117		1.86701	1.06811	1.09942	1.0294	1.03427	1.05488	1.05309	1.0723	1.04419	1.1114	1.027	1.03459	1.07441	1.05859	0.027393	0.00790768
1.88822	119.098	155.297	109.484	117.89	104.993	115.147	157.875	227.388	101.241	167.441	100.907	152.154		1.88822	104.098	140.297	94.484	102.89	89.993	100.147	142.875	212.388	86.241	152.441	85.907	137.154		1.88822	1.0462	1.08137	1.01652	1.07992	1.0588	1.06081	1.05446	1.05556	1.09366	1.04323	1.00771	1.06692	1.05543	0.0251042	0.00724695
1.90944	120.699	155.134	110.725	114.761	103.909	113.247	157.861	223.588	99.25	170.953	101.824	152		1.90944	105.699	140.134	95.725	99.761	88.909	98.247	142.861	208.588	84.25	155.953	86.824	137		1.90944	1.06229	1.08011	1.02987	1.04708	1.04604	1.04068	1.05435	1.03667	1.06841	1.06727	1.01847	1.06572	1.05142	0.0181529	0.00524028
1.93066	120.647	154.016	112.833	114.743	106.368	112.33	156.464	217.518	98.398	166.447	101.301	151.076		1.93066	105.647	139.016	97.833	99.743	91.368	97.33	141.464	202.518	83.398	151.447	86.301	136.076		1.93066	1.06177	1.07149	1.05255	1.04689	1.07498	1.03097	1.04404	1.00651	1.05761	1.03643	1.01233	1.05854	1.04618	0.0215065	0.00620838
1.95187	121.449	157.303	112.359	112.867	107.533	112.945	154.567	221.317	97.374	166.889	101.254	151.647		1.95187	106.449	142.303	97.359	97.867	92.533	97.945	139.567	206.317	82.374	151.889	86.254	136.647		1.95187	1.06983	1.09683	1.04745	1.0272	1.08868	1.03749	1.03004	1.02539	1.04462	1.03945	1.01178	1.06298	1.04848	0.0261302	0.00754314
1.97309	118.331	157.1	111.474	113.541	104.199	112.55	159.178	219.848	96.422	166.271	101.834	150.465		1.97309	103.331	142.1	96.474	98.541	89.199	97.55	144.178	204.848	81.422	151.271	86.834	135.465		1.97309	1.03849	1.09526	1.03793	1.03428	1.04946	1.0333	1.06407	1.01809	1.03255	1.03522	1.01859	1.05378	1.04259	0.0211793	0.00611393
1.9943	120.956	149.438	110.135	111.64	99.932	112.466	152.853	223.546	100.323	162.95	102.679	150.144		1.9943	105.956	134.438	95.135	96.64	84.932	97.466	137.853	208.546	85.323	147.95	87.679	135.144		1.9943	1.06487	1.03621	1.02352	1.01433	0.999254	1.03241	1.01739	1.03647	1.08202	1.0125	1.0285	1.05129	1.03323	0.023426	0.00676251
2.01552	120.615	153.872	109.557	116.206	103.311	111.878	153.75	219.059	99.873	166.016	98.29	149.266		2.01552	105.615	138.872	94.557	101.206	88.311	96.878	138.75	204.059	84.873	151.016	83.29	134.266		2.01552	1.06145	1.07038	1.01731	1.06225	1.03901	1.02618	1.02401	1.01417	1.07631	1.03348	0.977014	1.04446	1.03717	0.0282198	0.00814634
2.03674	117.437	150.427	106.375	112.12	102.566	113.796	158.249	224.678	98.044	163.079	101.035	148.629		2.03674	102.437	135.427	91.375	97.12	87.566	98.796	143.249	209.678	83.044	148.079	86.035	133.629		2.03674	1.02951	1.04383	0.983072	1.01936	1.03024	1.0465	1.05722	1.04209	1.05312	1.01338	1.00921	1.0395	1.03059	0.0213095	0.00615152
2.05795	117.587	151.332	107.689	115.355	104.766	111.183	155.676	220.587	97.283	164.148	102.22	149.597		2.05795	102.587	136.332	92.689	100.355	89.766	96.183	140.676	205.587	82.283	149.148	87.22	134.597		2.05795	1.03101	1.05081	0.997209	1.05332	1.05613	1.01882	1.03823	1.02176	1.04347	1.0207	1.02311	1.04703	1.03347	0.0177286	0.00511781
2.07917	119.467	154.534	110.298	115.538	105.893	111.348	154.411	223.069	95.789	166.324	101.117	147.194		2.07917	104.467	139.534	95.298	100.538	90.893	96.348	139.411	208.069	80.789	151.324	86.117	132.194		2.07917	1.04991	1.07549	1.02528	1.05524	1.06939	1.02057	1.02889	1.03409	1.02452	1.03559	1.01018	1.02834	1.03812	0.0201091	0.00580499
2.10038	117.793	158.802	108.875	115.323	102.558	114.689	153.742	220.343	99.451	164.094	103.228	149.325		2.10038	102.793	143.802	93.875	100.323	87.558	99.689	138.742	205.343	84.451	149.094	88.228	134.325		2.10038	1.03309	1.10838	1.00997	1.05298	1.03015	1.05596	1.02395	1.02055	1.07096	1.02033	1.03494	1.04492	1.04218	0.0271699	0.00784327
2.1216	117.603	151.465	109.754	115.817	104.925	112.078	155.754	220.341	101.229	166.229	97.831	150.138		2.1216	102.603	136.465	94.754	100.817	89.925	97.078	140.754	205.341	86.229	151.229	82.831	135.138		2.1216	1.03118	1.05183	1.01943	1.05817	1.058	1.0283	1.0388	1.02054	1.09351	1.03494	0.97163	1.05124	1.03813	0.0293252	0.00846546
2.14282	116.155	151.023	112.426	116.805	103.388	112.036	155.928	222.502	96.383	165.655	101.994	145.332		2.14282	101.155	136.023	97.426	101.805	88.388	97.036	140.928	207.502	81.383	150.655	86.994	130.332		2.14282	1.01662	1.04842	1.04817	1.06854	1.03991	1.02786	1.04009	1.03128	1.03205	1.03101	1.02046	1.01385	1.03486	0.0154152	0.00445
2.16403	119.095	153.766	111.359	113.531	105.376	112.609	155.752	217.821	99.034	163.945	99.738	149.317		2.16403	104.095	138.766	96.359	98.531	90.376	97.609	140.752	202.821	84.034	148.945	84.738	134.317		2.16403	1.04617	1.06957	1.03669	1.03417	1.0633	1.03393	1.03879	1.00801	1.06567	1.01931	0.993999	1.04485	1.03787	0.022832	0.00659104
2.18525	120.458	153.052	108.485	111.47	105.613	112.249	153.48	224.199	99.346	163.383	98.73	149.061		2.18525	105.458	138.052	93.485	96.47	90.613	97.249	138.48	209.199	84.346	148.383	83.73	134.061		2.18525	1.05987	1.06406	1.00577	1.01254	1.06609	1.03011	1.02202	1.03971	1.06963	1.01546	0.982175	1.04286	1.03419	0.0276806	0.00799069
2.20646	118.428	155.442	112.67	111.845	102.97	113.016	154.006	220.194	98.143	162.721	98.08	149.201		2.20646	103.428	140.442	97.67	96.845	87.97	98.016	139.006	205.194	83.143	147.721	83.08	134.201		2.20646	1.03947	1.08248	1.0508	1.01648	1.035	1.03824	1.0259	1.01981	1.05437	1.01093	0.97455	1.04395	1.03266	0.0266543	0.00769443
2.22768	116.563	155.546	113.76	112.546	102.976	114.21	154.62	221.169	97.292	165.942	99.691	149.554		2.22768	101.563	140.546	98.76	97.546	87.976	99.21	139.62	206.169	82.292	150.942	84.691	134.554		2.22768	1.02072	1.08329	1.06252	1.02383	1.03507	1.05089	1.03043	1.02465	1.04358	1.03297	0.993448	1.0467	1.03734	0.0227101	0.00655583
2.2489	117.059	152.473	112.267	114.555	103.344	113.122	157.769	220.317	99.032	165.507	99.137	151.268		2.2489	102.059	137.473	97.267	99.555	88.344	98.122	142.769	205.317	84.032	150.507	84.137	136.268		2.2489	1.02571	1.0596	1.04646	1.04492	1.0394	1.03936	1.05368	1.02042	1.06565	1.03	0.986949	1.06003	1.03935	0.0217295	0.00627278
2.27011	120.591	152.624	113.649	116.017	106.88	110.383	156.595	223.29	95.562	166.703	96.084	150.235		2.27011	105.591	137.624	98.649	101.017	91.88	95.383	141.595	208.29	80.562	151.703	81.084	135.235		2.27011	1.06121	1.06076	1.06133	1.06027	1.081	1.01035	1.04501	1.03519	1.02164	1.03818	0.951137	1.05199	1.03984	0.0340261	0.0098225
2.29133	120.304	150.96	110.024	115.317	103.79	108.752	155.776	218.427	96.259	162.13	100.43	151.812		2.29133	105.304	135.96	95.024	100.317	88.79	93.752	140.776	203.427	81.259	147.13	85.43	136.812		2.29133	1.05832	1.04794	1.02233	1.05292	1.04464	0.993071	1.03897	1.01102	1.03048	1.00688	1.00212	1.06426	1.03108	0.0237383	0.00685266
2.31254	119.992	155.329	111.892	114.075	103.132	111.643	156.621	221.279	93.815	164.143	99.117	152.316		2.31254	104.992	140.329	96.892	99.075	88.132	96.643	141.621	206.279	78.815	149.143	84.117	137.316		2.31254	1.05519	1.08161	1.04243	1.03988	1.0369	1.02369	1.0452	1.0252	0.999486	1.02066	0.986715	1.06818	1.03543	0.0267787	0.00773035
2.33376	120.556	155.398	112.616	114.059	103.185	113.123	157.046	224.659	95.139	160.499	100.512	152.61		2.33376	105.556	140.398	97.616	99.059	88.185	98.123	142.046	209.659	80.139	145.499	85.512	137.61		2.33376	1.06085	1.08215	1.05022	1.03971	1.03753	1.03937	1.04834	1.042	1.01628	0.995723	1.00308	1.07047	1.04048	0.0255979	0.00738947
2.35498	120.141	151.182	111.299	113.623	102.068	114.965	152.756	220.854	99.055	166.873	101.854	150.947		2.35498	105.141	136.182	96.299	98.623	87.068	99.965	137.756	205.854	84.055	151.873	86.854	135.947		2.35498	1.05668	1.04965	1.03605	1.03514	1.02438	1.05888	1.01668	1.02309	1.06594	1.03934	1.01882	1.05753	1.04018	0.0172412	0.00497709
2.37619	116.186	153.37	112.061	112.233	103.864	114.409	155.918	217.527	95.56	164.644	102.81	151.134		2.37619	101.186	138.37	97.061	97.233	88.864	99.409	140.918	202.527	80.56	149.644	87.81	136.134		2.37619	1.01693	1.06651	1.04425	1.02055	1.04552	1.05299	1.04001	1.00655	1.02162	1.02409	1.03003	1.05899	1.03567	0.0185263	0.0053481
2.39741	117.509	151.012	109.069	112.326	102.004	114.945	154.479	224.439	96.239	161.815	102.668	148.117		2.39741	102.509	136.012	94.069	97.326	87.004	99.945	139.479	209.439	81.239	146.815	87.668	133.117		2.39741	1.03023	1.04834	1.01206	1.02153	1.02363	1.05867	1.02939	1.0409	1.03023	1.00473	1.02837	1.03552	1.0303	0.0147177	0.00424863
2.41862	112.243	153.228	113.152	113.475	103.954	114.476	153.746	220.63	93.1	160.682	100.824	151.006		2.41862	97.243	138.228	98.152	98.475	88.954	99.476	138.746	205.63	78.1	145.682	85.824	136.006		2.41862	0.977307	1.06542	1.05598	1.03359	1.04657	1.0537	1.02398	1.02197	0.990419	0.996976	1.00674	1.05799	1.02755	0.0294903	0.00851311
2.43984	115.998	151.267	108.992	110.158	101.911	111.683	156.271	223.266	91.297	167.513	103.291	147.29		2.43984	100.998	136.267	93.992	95.158	86.911	96.683	141.271	208.266	76.297	152.513	88.291	132.29		2.43984	1.01505	1.0503	1.01123	0.99877	1.02254	1.02412	1.04262	1.03507	0.967554	1.04372	1.03568	1.02909	1.02298	0.0228991	0.00661041
2.46106	118.553	151.857	111.874	116.112	105.215	112.106	154.27	222.635	94.737	168.939	100.949	149.119		2.46106	103.553	136.857	96.874	101.112	90.215	97.106	139.27	207.635	79.737	153.939	85.949	134.119		2.46106	1.04072	1.05485	1.04223	1.06126	1.06141	1.0286	1.02785	1.03194	1.01118	1.05348	1.0082	1.04331	1.03875	0.0178248	0.00514557
2.48227	116.804	149.879	111.682	116.243	101.645	114.449	157.147	222.89	95.07	166.801	106.093	149.38		2.48227	101.804	134.879	96.682	101.243	86.645	99.449	142.147	207.89	80.07	151.801	91.093	134.38		2.48227	1.02315	1.03961	1.04017	1.06264	1.01941	1.05342	1.04908	1.03321	1.0154	1.03885	1.06854	1.04534	1.04073	0.0164394	0.00474564
2.50349	119.585	148.152	110.938	114.928	103.504	115.234	152.529	223.969	98.09	171.105	102.823	146.556		2.50349	104.585	133.152	95.938	99.928	88.504	100.234	137.529	208.969	83.09	156.105	87.823	131.556		2.50349	1.05109	1.0263	1.03216	1.04884	1.04128	1.06173	1.015	1.03857	1.0537	1.06831	1.03019	1.02338	1.04088	0.0162467	0.00469001
2.5247	116.554	153.188	110.3	113.326	101.453	117.175	153.902	223.641	93.379	166.087	104.178	150.847		2.5247	101.554	138.188	95.3	98.326	86.453	102.175	138.902	208.641	78.379	151.087	89.178	135.847		2.5247	1.02063	1.06511	1.0253	1.03202	1.01715	1.08229	1.02514	1.03694	0.993957	1.03396	1.04608	1.05676	1.03628	0.0236151	0.00681709
2.54592	118.859	153.199	112.164	111.122	100.428	113.982	155.873	225.395	92.963	163.542	107.968	151.798		2.54592	103.859	138.199	97.164	96.122	85.428	98.982	140.873	210.395	77.963	148.542	92.968	136.798		2.54592	1.0438	1.0652	1.04535	1.00889	1.00509	1.04847	1.03968	1.04565	0.988682	1.01655	1.09054	1.06415	1.0385	0.0290185	0.00837691
2.56714	119.006	149.841	110.895	114.135	98.573	112.982	153.228	221.317	93.496	161.509	105.935	149.861		2.56714	104.006	134.841	95.895	99.135	83.573	97.982	138.228	206.317	78.496	146.509	90.935	134.861		2.56714	1.04528	1.03931	1.0317	1.04051	0.983265	1.03788	1.02016	1.02539	0.995441	1.00264	1.06669	1.04909	1.02811	0.0241374	0.00696787
2.58835	120.727	153.468	112.505	113.681	101.192	117.556	155.223	218.515	95.085	165.14	103.121	151.661		2.58835	105.727	138.468	97.505	98.681	86.192	102.556	140.223	203.515	80.085	150.14	88.121	136.661		2.58835	1.06257	1.06727	1.04902	1.03575	1.01408	1.08633	1.03488	1.01146	1.01559	1.02748	1.03368	1.06309	1.04177	0.0239304	0.00690812
2.60957	120.814	151.482	110.805	112.997	104.254	113.398	156.914	217.311	97.709	166.26	102.963	147.74		2.60957	105.814	136.482	95.805	97.997	89.254	98.398	141.914	202.311	82.709	151.26	87.963	132.74		2.60957	1.06345	1.05196	1.03073	1.02857	1.0501	1.04228	1.04736	1.00548	1.04887	1.03515	1.03183	1.03259	1.03903	0.0150011	0.00433045
2.63078	121.764	149.64	110.224	111.991	104.063	112.65	154.208	219.14	94.746	165.178	102.397	149.333		2.63078	106.764	134.64	95.224	96.991	89.063	97.65	139.208	204.14	79.746	150.178	87.397	134.333		2.63078	1.07299	1.03776	1.02448	1.01801	1.04786	1.03436	1.02739	1.01457	1.01129	1.02774	1.02519	1.04498	1.03222	0.0170807	0.00493077
2.652	118.125	148.677	111.089	112.96	102.74	113.373	156.805	219.087	94.447	163.623	100.803	147.185		2.652	103.125	133.677	96.089	97.96	87.74	98.373	141.805	204.087	79.447	148.623	85.803	132.185		2.652	1.03642	1.03034	1.03379	1.02818	1.03229	1.04202	1.04656	1.0143	1.0075	1.0171	1.00649	1.02827	1.02694	0.0129513	0.00373872
2.67322	117.325	147.529	112.273	114.059	104.431	112.379	154.994	220.632	95.818	166.539	102.875	147.951		2.67322	102.325	132.529	97.273	99.059	89.431	97.379	139.994	205.632	80.818	151.539	87.875	132.951		2.67322	1.02838	1.02149	1.04653	1.03971	1.05219	1.03149	1.03319	1.02198	1.02489	1.03706	1.0308	1.03423	1.03349	0.00933853	0.0026958
2.69443	115.089	148.685	112.271	111.601	101.135	112.116	154.479	221.869	96.028	162.306	101.311	147.201		2.69443	100.089	133.685	97.271	96.601	86.135	97.116	139.479	206.869	81.028	147.306	86.311	132.201		2.69443	1.00591	1.0304	1.04651	1.01392	1.01341	1.0287	1.02939	1.02813	1.02755	1.00809	1.01245	1.02839	1.02274	0.0118944	0.00343362
2.71565	120.477	148.352	112.424	114.353	97.296	110.947	152.685	222.425	95.648	160.925	102.487	145.556		2.71565	105.477	133.352	97.424	99.353	82.296	95.947	137.685	207.425	80.648	145.925	87.487	130.556		2.71565	1.06006	1.02784	1.04815	1.0428	0.96824	1.01632	1.01615	1.03089	1.02273	0.998639	1.02625	1.0156	1.02281	0.0238028	0.00687128
2.73686	117.917	147.586	109.758	113.099	102.551	111.108	153.573	219.783	96.107	164.811	102.139	145.042		2.73686	102.917	132.586	94.758	98.099	87.551	96.108	138.573	204.783	81.107	149.811	87.139	130.042		2.73686	1.03433	1.02193	1.01947	1.02964	1.03007	1.01803	1.02271	1.01776	1.02855	1.02523	1.02216	1.0116	1.02346	0.00641211	0.00185102
2.75808	116.412	151.66	109.736	113.961	100.716	109.855	154.482	220.824	94.856	163.706	100.56	149.772		2.75808	101.412	136.66	94.736	98.961	85.716	94.855	139.482	205.824	79.856	148.706	85.56	134.772		2.75808	1.01921	1.05333	1.01923	1.03869	1.00848	1.00475	1.02942	1.02294	1.01269	1.01767	1.00364	1.04839	1.0232	0.0163306	0.00471424
2.7793	114.132	147.708	110.488	113.337	99.761	111.542	155.226	220.153	95.084	161.258	99.794	145.665		2.7793	99.132	132.708	95.488	98.337	84.761	96.542	140.226	205.153	80.084	146.258	84.794	130.665		2.7793	0.996291	1.02287	1.02732	1.03214	0.997242	1.02262	1.03491	1.0196	1.01558	1.00092	0.994656	1.01644	1.01505	0.0143433	0.00414056
2.80051	115.946	148.977	111.051	114.877	100.001	109.179	155.182	224.999	95.945	164.239	102.353	149.035		2.80051	100.946	133.977	96.051	99.877	85.001	94.179	140.182	209.999	80.945	149.239	87.353	134.035		2.80051	1.01452	1.03265	1.03338	1.0483	1.00007	0.997594	1.03458	1.04369	1.0265	1.02132	1.02467	1.04266	1.02666	0.0162088	0.00467908
2.82173	116.409	147.683	110.53	115.003	104.477	111.479	154.441	220.825	96.284	167.781	100.983	151.955		2.82173	101.409	132.683	95.53	100.003	89.477	96.479	139.441	205.825	81.284	152.781	85.983	136.955		2.82173	1.01918	1.02268	1.02777	1.04962	1.05273	1.02196	1.02911	1.02294	1.0308	1.04556	1.0086	1.06537	1.03303	0.0166091	0.00479462
2.84294	110.593	146.828	109.41	113.104	100.779	111.24	151.251	225.508	96.379	161.315	100.556	147.117		2.84294	95.593	131.828	94.41	98.104	85.779	96.24	136.251	210.508	81.379	146.315	85.556	132.117		2.84294	0.960724	1.01609	1.01572	1.02969	1.00922	1.01943	1.00557	1.04622	1.032	1.00131	1.00359	1.02774	1.01394	0.0213952	0.00617626
2.86416	113.73	151.673	112.214	111.934	101.133	108.537	157.47	219.052	94.841	165.092	99.338	147.602		2.86416	98.73	136.673	97.214	96.934	86.133	93.537	142.47	204.052	79.841	150.092	84.338	132.602		2.86416	0.992251	1.05343	1.04589	1.01741	1.01338	0.990794	1.05147	1.01413	1.0125	1.02716	0.989307	1.03151	1.01994	0.0227005	0.00655308
2.88538	112.156	146.054	106.858	114.498	100.144	109.977	157.642	221.957	95.808	164.262	97.975	146.028		2.88538	97.156	131.054	91.858	99.498	85.144	94.977	142.642	206.957	80.808	149.262	82.975	131.028		2.88538	0.976432	1.01012	0.988268	1.04432	1.00175	1.00605	1.05274	1.02857	1.02476	1.02148	0.973319	1.01927	1.01226	0.0247754	0.00715203
2.90659	116.364	146.762	109.215	110.317	103.006	111.854	157.37	221.742	94.051	165.043	97.307	148.473		2.90659	101.364	131.762	94.215	95.317	88.006	96.854	142.37	206.742	79.051	150.043	82.307	133.473		2.90659	1.01872	1.01558	1.01363	1.00044	1.03542	1.02593	1.05073	1.0275	1.00248	1.02682	0.965483	1.03829	1.01842	0.0220495	0.00636515
2.92781	117.452	145.377	107.487	113.164	99.797	108.997	155.327	218.489	91.771	164.14	97.929	143.418		2.92781	102.452	130.377	92.487	98.164	84.797	93.997	140.327	203.489	76.771	149.14	82.929	128.418		2.92781	1.02966	1.00491	0.995036	1.03032	0.997665	0.995666	1.03565	1.01133	0.973565	1.02064	0.972779	0.998965	1.00552	0.020831	0.00601338
2.94902	118.749	143.733	105.371	112.848	99.403	112.34	152.848	218.063	94.447	167.03	97.21	144.412		2.94902	103.749	128.733	90.371	97.848	84.403	97.34	137.848	203.063	79.447	152.03	82.21	129.412		2.94902	1.04269	0.992235	0.97227	1.027	0.99303	1.03108	1.01736	1.00922	1.0075	1.04042	0.964345	1.0067	1.00865	0.0250256	0.00722427
2.97024	119.354	143.687	108.303	114.38	101.524	111.952	151.429	220.796	93.735	160.363	98.516	145.952		2.97024	104.354	128.687	93.303	99.38	86.524	96.952	136.429	205.796	78.735	145.363	83.516	130.952		2.97024	1.04877	0.99188	1.00381	1.04308	1.01798	1.02697	1.00688	1.0228	0.998472	0.994792	0.979665	1.01868	1.01282	0.0207893	0.00600136
2.99146	114.944	144.075	109.666	111.66	99.363	110.792	156.076	222.151	93.772	165.43	101.08	146.881		2.99146	99.944	129.075	94.666	96.66	84.363	95.792	141.076	207.151	78.772	150.43	86.08	131.881		2.99146	1.00445	0.994871	1.01848	1.01454	0.992559	1.01468	1.04118	1.02953	0.998941	1.02947	1.00974	1.0259	1.01453	0.0151961	0.00438674
3.01267	117.105	145.785	110.216	112.696	102.13	115.623	152.619	218.893	93.249	158.197	99.806	146.982		3.01267	102.105	130.785	95.216	97.696	87.13	100.623	137.619	203.893	78.249	143.197	84.806	131.982		3.01267	1.02617	1.00805	1.0244	1.02541	1.02511	1.06585	1.01567	1.01334	0.992309	0.979969	0.994797	1.02669	1.01648	0.0219952	0.00634948
3.03389	113.636	147.764	111.774	113.796	99.944	112.559	151.359	218.811	96.141	163.99	98.501	145.189		3.03389	98.636	132.764	96.774	98.796	84.944	97.559	136.359	203.811	81.141	148.99	83.501	130.189		3.03389	0.991307	1.0233	1.04116	1.03695	0.999395	1.0334	1.00637	1.01293	1.02898	1.01961	0.979489	1.01274	1.01547	0.01892	0.00546174
[truncated: 856 more rows]

## Sheet: MRC5 Pol2-GFP siXAB2 NoUV
														average pre bleach														0
[truncated: 1,002 more rows]

## Sheet: MRC5 Pol2-GFP siXAB2 3h UV
															average pre bleach														0
[truncated: 1,002 more rows]

[truncated: 4 more sheets: RECAP, RECAP less, p-value siMock +-UV, p-value siXAB2 +-UV]
