# Supplementary material for: XAB2 dynamics during DNA damage-dependent transcription inhibition
Source: eLife. 2022 Jul 26;11:e77094. doi: 10.7554/eLife.77094 (PMC9436415; doi:10.7554/eLife.77094)
Supplement: Figure 7—source data 2. [file elife-77094-fig7-data2.xlsx]

## Sheet: PLA average
	siMock					siXAB2						siMock					siXAB2
	No UV	1h	2h	4h	16h	No UV	1h	2h	4h	16h		No UV	1h	2h	4h	16h	No UV	1h	2h	4h	16h
29.04.2022	1621996	2162961	4234573	3117361	1419114	1335971	4856028	3895793	4239467	1455504		99.0392	132.071	258.563	190.346	86.6512	98.083	356.515	286.017	311.249	106.859
	1518913	2196112	4642417	3282553	1134656	1361833	4028538	3307860	2039522	1063534		92.745	134.095	283.466	200.433	69.2822	99.9817	295.763	242.853	149.736	78.0815
	1851585	1491279	3078484	2459263	761773	1099444	3266239	4686651	4159581	1151733		113.058	91.0576	187.973	150.163	46.5139	80.7179	239.797	344.08	305.384	84.5568
	1307498	2350293	2980488	2509625	1491806	1288959	5041758	6120122	6322266	1529806		79.836	143.509	181.989	153.238	91.0898	94.6315	370.151	449.321	464.162	112.314
	2005773	2058664	3565381	2521282	919654	814359	4181538	3551032	2356566	1825777		122.473	125.702	217.703	153.95	56.1542	59.7878	306.996	260.706	173.012	134.043
	1779904	2836418	2425824	1784807	815939	1359973	4880847	3618491	3552025	1985698		108.681	173.192	148.121	108.98	49.8213	99.8451	358.337	265.659	260.779	145.784
	1358128	2085017	3685304	1831979	1212801	884503	4145897	8186668	2824038	1725764		82.9274	127.311	225.025	111.861	74.0538	64.9376	304.379	601.041	207.332	126.7
	2711012	3591643	4483840	1620142	1863664	934634	7249929	6176008	2249729	1225084		165.535	219.306	273.784	98.926	113.796	68.618	532.268	453.424	165.168	89.942
	1300954	1695201	2970726	3113483	1735036	1427682	9220695	4137959	1727785	1107587		79.4364	103.509	181.393	190.11	105.941	104.816	676.956	303.797	126.849	81.3157
	1257922	1118261	3001226	3109699	580634	1306310	7333606	4010039	1667644	1321387		76.8088	68.2811	183.255	189.879	35.4536	95.9054	538.411	294.405	122.433	97.0123
	2133188	1864866	4362277	2078830	634796	1101034	3353091	4462802	2672113	1448267		130.253	113.869	266.361	126.934	38.7607	80.8346	246.174	327.646	196.179	106.327
	1130007	1792152	2551873	2087165	1418918	1009273	2719684	5368361	2689514	2281492		68.9983	109.429	155.818	127.443	86.6393	74.0978	199.671	394.129	197.456	167.5
	1518119	2197600	2796596	1614425	974601	585441	2914705	3502692	2703424	2101793		92.6965	134.186	170.76	98.577	59.5092	42.9813	213.989	257.157	198.477	154.307
	914086	1711984	3937118	2378002	993545	960430	4481181	2967692	2442866	1236417		55.8142	104.534	240.401	145.201	60.666	70.5119	328.995	217.879	179.348	90.774
	1318346	1229754	5071381	1375244	1022465	669407	2379029	2625190	2535481	1337936		80.4983	75.0889	309.659	83.9725	62.4318	49.1459	174.661	192.734	186.147	98.2272
	1391196	1939330	4276377	2229229	1322498	2135545	4126256	3233219	2474215	871742		84.9466	118.416	261.116	136.117	80.7519	156.785	302.937	237.373	181.649	64.0007
	873226	2072973	6185040	1642210	1036463	1011544	3734976	2531625	1730549	1508287		53.3193	126.576	377.659	100.274	63.2865	74.2645	274.211	185.864	127.052	110.734
	1732374	1950887	3136218	1977204	987289	1148831	3704609	5030379	2566240	1402148		105.779	119.121	191.498	120.728	60.284	84.3437	271.981	369.315	188.406	102.941
	1761669	2077861	2529042	2063272	915209	606377	5455286	2185192	2923543	1306715		107.568	126.874	154.424	125.984	55.8828	44.5184	400.511	160.43	214.638	95.9351
	1608696	1634918	3934320	1057647	1002100	1032104	2726756	4569121	2478646	1240507		98.2271	99.8283	240.23	64.58	61.1883	75.774	200.19	335.451	181.975	91.0743
	970410	2452101	3158258	1512691	1175190	833523	5112069	3665312	3313932	1255260		59.2533	149.726	192.844	92.3651	71.7572	61.1948	375.313	269.096	243.299	92.1574
	1047084	1849783	3034166	3117361	1142243	2238740	3576949	2491373	3098848	1120542		63.9351	112.948	185.266	190.346	69.7455	164.362	262.609	182.909	227.508	82.2668
	2237880	1793150	4341796	3282553	780039	2062382	5695053	8220233	1909586	1347063		136.645	109.49	265.111	200.433	47.6293	151.414	418.114	603.505	140.196	98.8973
	2542883	1826273	3098033	2459263	609730	2052458	3858123	7388066	1811549	1467856		155.269	111.512	189.166	150.163	37.2302	150.685	283.252	542.41	132.998	107.766
	1669914	1408790	4635440	2509625	1063013	1331700	2924331	4957717	1915126	1387907		101.965	86.0209	283.04	153.238	64.9077	97.7694	214.696	363.981	140.603	101.896
	1380482	1861977	3644844	2521282	1913199	1555142	6336661	7602656	6200073	1101109		84.2924	113.693	222.555	153.95	116.82	114.174	465.219	558.164	455.191	80.8401
	1568972	1760519	2547162	1784807	2596501	1751069	5939054	6652889	2528342	569088		95.8016	107.497	155.53	108.98	158.543	128.558	436.028	488.435	185.623	41.7807
	1568799	2007164	2496742	1831979	998999	1718519	5468169	7119318	2940756	1977678		95.791	122.558	152.451	111.861	60.999	126.169	401.457	522.679	215.901	145.195
	1576670	1755299	2865188	1620142	846399	1516238	5675375	3388411	2799224	1913146		96.2716	107.179	174.949	98.926	51.6812	111.318	416.669	248.767	205.511	140.457
	1268783	3060280	1586872	3113483	1372511	1685176	5744778	3403728	3463100	1284522		77.472	186.861	96.8946	190.11	83.8057	123.721	421.764	249.891	254.25	94.3058
	1354533	2367180	2738228	3109699	947280	2127120	6413668	3194474	3646956	1120530		82.7079	144.54	167.196	189.879	57.841	156.167	470.872	234.529	267.749	82.2659
	1281616	3045734	3144648	2078830	895619	1181984	5509217	4488525	5809939	1376830		78.2556	185.973	192.013	126.934	54.6866	86.7777	404.47	329.534	426.548	101.083
	1197371	2764247	3724003	2087165	872499	1540143	3234435	4570973	4657714	1307915		73.1116	168.785	227.388	127.443	53.2749	113.073	237.463	335.587	341.955	96.0232
	1070673	2766486	3646591	1614425	2557310	998295	7052834	5677655	3152040	1939772		65.3754	168.922	222.661	98.577	156.15	73.2918	517.798	416.836	231.413	142.412
	1960463	2261740	1570795	2378002	2656783	919821	6959902	2154591	2326996	1690951		119.706	138.102	95.9129	145.201	162.223	67.5305	510.975	158.184	170.841	124.145
	1161136	3115347	2035590	1375244	1187417	1501720	7219865	2491806	3303424	2877589		70.8991	190.223	124.293	83.9725	72.5038	110.252	530.061	182.941	242.527	211.264
	847916	1855060	4021999	2229229	1077842	1126799	5009665	5001028	2580742	2543756		51.7738	113.27	245.584	136.117	65.8131	82.7262	367.795	367.16	189.47	186.755
	649676	2371247	5280553	1642210	2500739	1959836	7318484	5963835	5128338	1324621		39.6693	144.789	322.431	100.274	152.695	143.885	537.301	437.847	376.507	97.2497
	1172734	1876978	2716401	1977204	2183447	1976824	5433740	3783325	1860273	869202		71.6073	114.608	165.864	120.728	133.321	145.132	398.929	277.76	136.576	63.8142
	851206	1428921	1713607	2063272	3204282	2399769	7038885	3213715	3512451	1349360		51.9747	87.2501	104.633	125.984	195.654	176.184	516.774	235.941	257.874	99.066
	1353858	2616980	1056490	1057647	3042947	1544131	3837147	3818813	1845261	910790		82.6667	159.793	64.5094	64.58	185.803	113.365	281.712	280.366	135.474	66.8675
	1574775	1705776	1817126	1512691	3668952	1207856	6159393	3857433	3366274	1096925		96.1559	104.155	110.954	92.3651	224.027	88.6772	452.204	283.201	247.142	80.5329
	1651108	1721922	3336759	2436156	1767094	1621474	4168666	3992188	3483728	976501		100.817	105.141	203.743	148.752	107.899	119.044	306.051	293.094	255.765	71.6918
	2128140	2671464	3941185	2009340	1917655	1638123	4063438	4182570	2537372	741574		129.944	163.12	240.649	122.691	117.092	120.266	298.325	307.072	186.286	54.4441
	2000395	2383710	1961789	2030433	2179268	1758372	3991151	4597818	2753424	2419409		122.144	145.55	119.787	123.978	133.066	129.094	293.018	337.558	202.148	177.626
	2847259	2113465	3412082	1584797	3040062	1364718	3045728	1658822	3474583	1860850		173.854	129.048	208.342	96.7679	185.627	100.194	223.608	121.786	255.093	136.618
	3003452	1323342	1843718	2940778	950961	1127704	3798069	1429303	1996544	2284921		183.391	80.8034	112.578	179.564	58.0658	82.7926	278.843	104.935	146.58	167.752
	1718563	1772096	4313263	3243083	1467607	2203920	3315212	1561024	3561393	1774746		104.936	108.204	263.368	198.023	89.6122	161.805	243.393	114.606	261.467	130.297
	1062826	968670	2510861	1251064	3386810	1625873	4132209	4167668	2163344	1969395		64.8963	59.1471	153.313	76.3901	206.799	119.367	303.374	305.978	158.826	144.587
	1261458	1293540	2958205	1791922	2152757	1178266	2357043	2610859	2154975	1037369		77.0248	78.9837	180.628	109.415	131.448	86.5048	173.047	191.681	158.212	76.1605
	3350350	1348121	3700899	2244042	2145228	1017704	6485337	4470658	2154426	1640196		204.573	82.3164	225.977	137.021	130.988	74.7168	476.134	328.222	158.171	120.418
	2016538	946538	2285127	2312744	2052217	884870	5906856	3808212	3724109	1380085		123.13	57.7957	139.53	141.216	125.309	64.9645	433.664	279.587	273.413	101.322
	3205576	3100839	2656156	2708790	1731873	1054766	5433089	3291572	3266180	2208850		195.733	189.338	162.185	165.399	105.748	77.4378	398.881	241.657	239.793	162.167
	1448650	1602622	2871500	2149377	1790600	773759	7293858	4796946	4750511	1459111		88.4547	97.8563	175.334	131.241	109.334	56.8071	535.493	352.177	348.768	107.124
	1837595	2485926	3208796	2670655	1694947		5598650	3678968	3431391	1137615		112.204	151.791	195.929	163.07	103.494		411.036	270.099	251.922	83.5203
	1723596	2023800	1885026	1477731	1925351		7720126	4169803	2205643	1312935		105.243	123.573	115.1	90.2304	117.562		566.788	306.134	161.932	96.3917
	2813008	2689460	1676294	1956533	1405187		8280901	6562022	2126286	984940		171.763	164.219	102.355	119.466	85.8009		607.959	481.764	156.106	72.3113
	1517435	2333478	1893258	1707685	895084		8682300	3685271	2308994	2575086		92.6547	142.482	115.603	104.271	54.6539		637.428	270.562	169.519	189.055
		1539820	1840633	2073781	2535724		3011898	3163470	3322443	1103760			94.0216	112.389	126.625	154.832		221.125	232.252	243.924	81.0347
		2549228	1416837	2395029	2077531		5064898	4344038	2425820	2520954			155.656	86.5122	146.241	126.854		371.85	318.926	178.096	185.081
		1805765	2119693	2099545	2324958		4198347	5340112	1678934				110.26	129.429	128.198	141.962		308.23	392.055	123.262
		2049592	1722083	1531453	1174324		4801656	4003952	2378011				125.148	105.151	93.5107	71.7043		352.523	293.958	174.586
		2088544	3163728	1388502	2006463		6953389	4371930	2452091				127.527	193.178	84.7821	122.515		510.497	320.974	180.025
		1440828	2324144	1974734	1132793		6166738	5982494	2264972				87.9771	141.912	120.577	69.1685		452.743	439.217	166.287
		3059051	3421684	2504965	3038081		5700981	4594405					186.786	208.928	152.953	185.506		418.549	337.307
		2635731	3335426	1880041	2172756		2878867	2346820					160.938	203.661	114.795	132.669		211.358	172.296
		2718618	2649995	1921249	1624922			3804732					165.999	161.809	117.312	99.2179			279.332
		1618397	2422937	1327155	1823828			2494463					98.8195	147.945	81.0362	111.363			183.136
		2257277	2170740		2394095			2669710					137.83	132.546		146.184			196.002
		2712645	5069967		3699233			4444699					165.634	309.573		225.876			326.316
		2501304	2201768		1968855			8011174					152.73	134.44		120.218			588.156
		1800875	3920346		1004428			4539640					109.962	239.377		61.3305			333.287
		2229277	3213825		1837261								136.12	196.236		112.183
		2816373	2655396		2432598								171.968	162.139		148.535
		2421200	4475009		1540345								147.839	273.245		94.0536
		1967652	2485787		2539501								120.145	151.782		155.062
		2180035	5197443		1340802								133.113	317.356		81.8695
		1205284	4314651		1247391								73.5948	263.453		76.1658
		2044798	2684292		2127792								124.856	163.903		129.923
		2382935	2657030		1392160								145.502	162.239		85.0054
		2351868	1869391		1675093								143.605	114.145		102.281
		1701765	5976962										103.91	364.954
		1279381	3975168										78.1191	242.724
		2130859	1703239										130.11	104
			2659218											162.372
			2190613											133.759
31.03.2022	5036982	8277634		6785672	6785672	6860234	8582987	7851581	15104037	5818256		84.5022	138.869		113.839	113.839	107.562	134.573	123.106	236.818	91.225
	4495067	6184818		8240209	8240209	5281614	15143092	14413988	11698169	6571448		75.4108	103.759		138.241	138.241	82.8109	237.43	225.998	183.417	103.034
	4449370	5220775		6371655	6371655	7144651	18747645	6557448	17279147	5385161		74.6442	87.5856		106.893	106.893	112.022	293.946	102.815	270.921	84.4344
	5170005	5003863		4827375	4827375	6967955	21449860	8273460	15307959	5592004		86.7338	83.9466		80.9858	80.9858	109.251	336.314	129.72	240.015	87.6775
	3518541	6487882		6984626	6984626	8049100	9439597	16025701	19815973	5815303		59.0283	108.843		117.177	117.177	126.203	148.004	251.268	310.696	91.1787
	4781383	6125147		6156825	6156825	5273777	10507233	10549925	12094199	20215067		80.2142	102.758		103.289	103.289	82.688	164.744	165.413	189.626	316.954
	3819979	3556884		5958964	5958964	4700675	7629044	7553326	9679940	5536362		64.0853	59.6716		99.9697	99.9697	73.7023	119.616	118.429	151.773	86.8051
	5217250	3946062		6652337	6652337	8293702	9229985	6124883	10000562	8093526		87.5264	66.2005		111.602	111.602	130.038	144.718	96.0326	156.8	126.899
	3247574	3756132		4049850	4049850	8430880	8269829	14437543	12259328	8917988		54.4825	63.0142		67.9417	67.9417	132.189	129.663	226.368	192.215	139.826
	6697275	5470802		4543126	4543126	6656087	22451250	14876794	9990089	17647763		112.356	91.7801		76.2171	76.2171	104.361	352.015	233.255	156.635	276.701
	3482983	6879321		4934032	4934032	5379590	6811145	14939938	8948866	13245820		58.4318	115.41		82.7751	82.7751	84.3471	106.793	234.245	140.31	207.682
	6651807	5816052		5580654	5580654	7785374	19031040	15262690	9097393	8127335		111.593	97.5722		93.623	93.623	122.068	298.389	239.305	142.639	127.429
	4362482	5945622		6538124	6538124	7225318	6071242	9632712	9049759	4872199		73.1866	99.7459		109.686	109.686	113.286	95.1915	151.032	141.892	76.3916
	4430028	10363295		5423912	5423912	5519547	12446301	9391280	11090366	14904535		74.3197	173.858		90.9935	90.9935	86.5415	195.147	147.247	173.887	233.69
	4937996	11188983		5053688	5053688	7504865	6301170	17247970	16431253	8876396		82.8416	187.71		84.7825	84.7825	117.669	98.7966	270.432	257.627	139.174
	4609282	9000346		3629975	3629975	4167028	6429330	8716936	14140150	6518535		77.327	150.993		60.8978	60.8978	65.3352	100.806	136.674	221.705	102.205
	6083668	8621545		5424032	5424032	6488145	5416668	17885467	19100824	11702174		102.062	144.638		90.9955	90.9955	101.728	84.9284	280.428	299.484	183.479
	4418419	6587557		5661056	5661056	5884106	7480055	14371994	13406532	5795115		74.125	110.515		94.9719	94.9719	92.2574	117.28	225.34	210.202	90.8621
	5244534	10042555		10510456	10510456	3340607	10943976	7986368	18556170	1891849		87.9842	168.477		176.327	176.327	52.3777	171.592	125.219	290.944	29.6625
	4298854	7418949		5497303	5497303	5725683	12311539	14382679	11588683	1581125		72.1191	124.463		92.2247	92.2247	89.7735	193.034	225.507	181.7	24.7906
	5001598	5882759		7814719	7814719	5028754	8109808	8809793	11014463	1876481		83.9086	98.6913		131.103	131.103	78.8463	127.154	138.13	172.697	29.4215
	5082803	6029415		8076286	8076286	1691707	9605009	10439726	11240453	2621620		85.2709	101.152		135.491	135.491	26.5244	150.598	163.685	176.24	41.1046
	8736491	9186463		9330206	9330206	6632921	9273179	17906759	21299021	22016542		146.566	154.115		156.527	156.527	103.998	145.395	280.762	333.949	345.199
	4393866	5674746		8304560	8304560	4328077	5591300	15649111	19972495	5482996		73.7131	95.2016		139.32	139.32	67.8603	87.6665	245.364	313.151	85.9684
	3063864	7301653		6554213	6554213	4379453	7044759	11273013	20019023	4784575		51.4005	122.495		109.956	109.956	68.6658	110.455	176.751	313.88	75.0178
	2136576	5945939		6723416	6723416	6991715	10786808	12650641	13935815	8029788		35.844	99.7512		112.794	112.794	109.624	169.127	198.351	218.501	125.9
	4538718	7511169		8717162	8717162	6330523	6531019	11648078	14200900	7122928		76.1432	126.01		146.242	146.242	99.2568	102.4	182.631	222.657	111.681
	3913972	10768954		5873787	5873787	4960942	9090305	7834758	16606133	8397889		65.6622	180.664		98.5407	98.5407	77.783	142.528	122.842	260.369	131.671
	3839813	6104504		5316724	5316724	4472925	7047056	6579223	12327373	9150190		64.4181	102.411		89.1953	89.1953	70.1314	110.491	103.156	193.282	143.467
	3976967	5746919		3943041	3943041	4050629	5572708	7029511	15922991	10952319		66.719	96.4124		66.1499	66.1499	63.5102	87.375	110.216	249.658	171.722
	3496916	5534260		5312328	5312328	8502254	17369315	10594209	6917723	9829150		58.6655	92.8447		89.1215	89.1215	133.308	272.335	166.108	108.464	154.112
	3430663	6134023		6274367	6274367	4166980	21922133	13304587	8086673	6879406		57.554	102.907		105.261	105.261	65.3344	343.719	208.604	126.792	107.863
	4289998	6391756		3983166	3983166	8715531	10355459	10627113	11327655	11149464		71.9705	107.23		66.823	66.823	136.652	162.364	166.623	177.607	174.813
	2665627	6113712		4177202	4177202	6827095	17481422	9749205	11570893	8558011		44.7195	102.566		70.0782	70.0782	107.043	274.093	152.859	181.421	134.182
	4420198	9348621		3881376	3881376	9098509	12779646	12119266	7311459	6421339		74.1548	156.836		65.1153	65.1153	142.656	200.373	190.019	114.637	100.681
	6368218	3012591		3069100	3069100	7695356	16032594	9152561	10414474	4913996		106.835	50.5403		51.4883	51.4883	120.656	251.376	143.504	163.289	77.047
	8416694	6285727		3823725	3823725	7178593	8262674	9535678	6486705	6991577		141.201	105.452		64.1482	64.1482	112.554	129.551	149.511	101.706	109.622
	6455298	8699863		3544207	3544207	8904312	8682650	8399633	8056672	7708960		108.296	145.952		59.4589	59.4589	139.611	136.136	131.699	126.321	120.869
	6560998	6018588		3583569	3583569	8856148	12262975	11370868	10595962	4860798		110.07	100.97		60.1192	60.1192	138.856	192.272	178.285	166.135	76.2129
	5792685	5258341		3780775	3780775	8837319	15465730	8464249	7291576	5765793		97.1802	88.2158		63.4276	63.4276	138.561	242.489	132.712	114.325	90.4024
	9707228	3395143		4019255	4019255	7394539	9366274	10723074	10652621	12967621		162.852	56.9581		67.4285	67.4285	115.94	146.855	168.128	167.023	203.32
	5281182	4780927		6756406	6756406	7064995	12772449	3515717	5646266	9386253		88.599	80.2065		113.348	113.348	110.773	200.26	55.1232	88.5283	147.168
	10152035	11400370		5346656	5346656	5459405	24260568	15970240	15474039	6364335		170.314	191.257		89.6974	89.6974	85.5985	380.384	250.399	242.619	99.787
	7052257	4546609		4754610	4754610	4867329	9660429	11371700	11784929	4533173		118.311	76.2755		79.765	79.765	76.3153	151.467	178.298	184.777	71.076
	6238288	6121141		4504314	4504314	6608375	23666891	15381651	9563801	5312328		104.656	102.69		75.566	75.566	103.613	371.075	241.17	149.952	83.2925
	5356732	12555552		3853904	3853904	3937371	17551441	12469199	12360829	11351041		89.8664	210.636		64.6545	64.6545	61.7344	275.191	195.506	193.807	177.974
	6519662	5197442		5088364	5088364	6713546	10100879	12869447	17321910	7609570		109.376	87.1941		85.3642	85.3642	105.262	158.373	201.781	271.592	119.311
	6676406	3137640		4044786	4044786	4443875	10532133	7373976	8456054	7758706		112.006	52.6382		67.8568	67.8568	69.6759	165.134	115.617	132.583	121.649
	5198409	4115900		5852980	5852980	3311530	15068726	11686806	8787058	4154337		87.2104	69.0498		98.1917	98.1917	51.9218	236.264	183.238	137.773	65.1362
	6161357	6982566		4957825	4957825	9057051	12850449	9163638	16786804	12407323		103.365	117.142		83.1742	83.1742	142.006	201.483	143.677	263.202	194.536
	8634749	4946185		4795429	4795429	5664561	8113050	11660877	9741483	18490957		144.86	82.979		80.4498	80.4498	88.8152	127.205	182.832	152.738	289.921
	7875940	6215027		5158275	5158275	5200591	11040150	16856493	12223709	12021949		132.13	104.266		86.5371	86.5371	81.5405	173.099	264.294	191.657	188.493
	9953469	6425991		4395807	4395807	4840394	15462335	6895162	10406763	9227141		166.983	107.805		73.7456	73.7456	75.893	242.435	108.11	163.169	144.673
	8458170	8204914		3962596	3962596	4411719	8813939	9978330	12804878	9651505		141.897	137.649		66.4779	66.4779	69.1717	138.195	156.451	200.769	151.327
	7654478	9210901		3483822	3483822	5397436	7682819	11390563	6433523	8544984		128.414	154.525		58.4458	58.4458	84.6269	120.46	178.594	100.872	133.978
	5714181	10074443		3447142	3447142	4897760	8127483	9419349	11049828	13078966		95.8631	169.012		57.8305	57.8305	76.7924	127.432	147.687	173.251	205.066
	6344879	8031544		5025481	5025481	8176308	15420505	5945159	7225429	16446772		106.444	134.74		84.3093	84.3093	128.197	241.779	93.2147	113.288	257.87
	6310930	8803319		7840781	7840781	5101282	6364358	16607534	22749696	10896825		105.874	147.688		131.54	131.54	79.9835	99.7873	260.391	356.695	170.852
	9772001	9547373		4677560	4677560	7261180	8428448	5189615	6682276	8965825		163.939	160.17		78.4724	78.4724	113.849	132.15	81.3684	104.772	140.576
	5735864	6160575		3190800	3190800	3364239	13007944		8799584	12048583		96.2269	103.352		53.53	53.53	52.7482	203.953		137.969	188.911
	4735166	2157912		4230387	4230387	5879040	16943388		6606268	10631900		79.4388	36.2019		70.9705	70.9705	92.178	265.657		103.58	166.699
	10501994	3974058		3192089	3192089	10939214	13501605		7849575	14631774		176.185	66.6702		53.5516	53.5516	171.517	211.693		123.074	229.413
	5887052	6430680		3228556	3228556	8971833	10635439		6290263	17051932		98.7633	107.883		54.1634	54.1634	140.67	166.754		98.6256	267.359
	6099808	4546300		2765116	2765116	9364847	11479765		7832429	9171640		102.333	76.2704		46.3886	46.3886	146.832	179.992		122.805	143.803
	5084444	3808177		4426766	4426766	6022580			5557706	8321900		85.2984	63.8873		74.265	74.265	94.4286			87.1398	130.48
	8971743	12224588		2177929	2177929	9306508			4687108	17221300		150.513	205.084		36.5377	36.5377	145.918			73.4896	270.014
	7240788	5286966		2315964	2315964	5534681			10451461	13411528		121.474	88.696		38.8534	38.8534	86.7788			163.869	210.281
	8843638	7085243		3687376	3687376	6135016			11238658	10370472		148.364	118.865		61.8607	61.8607	96.1915			176.212	162.6
	6418160	3897996		3778743	3778743	6763718			6781646	10343874		107.673	65.3942		63.3935	63.3935	106.049			106.33	162.183
	6088950	3483882		4276073	4276073	6308464			8517928	7406349		102.15	58.4468		71.7369	71.7369	98.911			133.553	116.125
	6041397	8713048		2800513	2800513	10790789			8437762	6596221		101.353	146.173		46.9824	46.9824	169.19			132.296	103.423
	4700090	5470080		3612246	3612246	5572967			15468147	6315155		78.8504	91.768		60.6003	60.6003	87.379			242.526	99.0159
	4975251	6069486		3951753	3951753	10245981			16435722	10810774		83.4666	101.824		66.296	66.296	160.648			257.697	169.503
	5941240	3286000		4031893	4031893	8738732			8827358	8271563		99.6724	55.1271		67.6405	67.6405	137.015			138.405	129.691
	5780849	7058239		5252079	5252079	8680354			11092116	5694936		96.9816	118.412		88.1108	88.1108	136.1			173.914	89.2914
	8587428	11722033		5960342	5960342	7377253			9801019	5679981		144.066	196.653		99.9928	99.9928	115.669			153.671	89.0569
	7388323	3619238		4848080	4848080	6168233			14293428	6307850		123.949	60.7176		81.3331	81.3331	96.7123			224.108	98.9013
	6291618	3475118		6685065	6685065	5393556			13622447	9846331		105.55	58.2998		112.151	112.151	84.566			213.588	154.381
	9643455	5894870		5522445	5522445	5333122			12979975	15000298		161.782	98.8944		92.6465	92.6465	83.6185			203.514	235.191
	9382632	8460981		4660912	4660912	5142157			14179884	5151060		157.406	141.944		78.1931	78.1931	80.6243			222.328	80.7639
	10777410	6460406		5105303	5105303	4884758			14621231	4400129		180.806	108.382		85.6484	85.6484	76.5886			229.248	68.99
		16157112		4219632	4219632	3981931			6312226	4641231			271.057		70.7901	70.7901	62.433			98.97	72.7703
	6358598	7104450		4837679	4837679	4946629			8618160	4047720		106.674	119.187		81.1586	81.1586	77.5586			135.125	63.4646
	7493077	5010453		8613402	8613402	5760892			18746246	3650746		125.707	84.0571		144.502	144.502	90.3255			293.924	57.2404
	9317744	3645128		7763072	7763072				11433263	3681430		156.318	61.152		130.236	130.236				179.263	57.7215
	5356726	4281432		3764147	3764147				11856139	11458422		89.8663	71.8268		63.1487	63.1487				185.893	179.658
	4809084	3600194		2779257	2779257				9457667	5839560		80.6789	60.3981		46.6258	46.6258				148.288	91.559
	4138143	8511628		4666559	4666559					10398469		69.423	142.794		78.2879	78.2879					163.039
	5692849	9679236		4974068	4974068					4261748		95.5053	162.382		83.4467	83.4467					66.8203
	4709338	5165500		4733342	4733342					7022817		79.0055	86.6583		79.4082	79.4082					110.111
	2878616	3995549		4562868	4562868					8754523		48.2927	67.0308		76.5483	76.5483					137.263
		12996642		6005300	6005300					4683602			218.036		100.747	100.747					73.4346
		7211221		5125321	5125321					7747270			120.978		85.9842	85.9842					121.47
		6424739		3201406	3201406					4216058			107.784		53.7079	53.7079					66.1039
		4506901		4975213	4975213					3229610			75.6094		83.4659	83.4659					50.6373
				7572428	7572428					3618575					127.038	127.038					56.736
				6494999	6494999										108.962	108.962
				3283138	3283138										55.0791	55.0791
				5601189	5601189										93.9675	93.9675
				3698975	3698975										62.0553	62.0553
				3980930	3980930										66.7855	66.7855
				4075814	4075814										68.3773	68.3773
				3869520	3869520										64.9164	64.9164
15.03.2022	6124501	4576309	5881710			5881710	12648701	20992359				70.3819	52.5903	67.5918			64.7683	139.285	231.164
	6450548	7536129	9785785			9785785	8647178	9946838				74.1288	86.6041	112.457			107.759	95.2211	109.533
	6124501	4846744	9444022			9444022	5524126	13141697				70.3819	55.6981	108.529			103.996	60.8306	144.714
	3269258	6196425	8548697			8548697	14010421	21524920				37.5698	71.2084	98.2404			94.1366	154.28	237.028
	8883671	9644450	7483720			7483720	11265137	14330834				102.09	110.833	86.0018			82.4093	124.05	157.808
	9056671	4954804	10013830			10013830	10148788	13141686				104.078	56.9399	115.077			110.27	111.757	144.714
	10084247	8102351	9793794			9793794	16357655	12512500				115.887	93.111	112.549			107.847	180.127	137.785
	10692406	9617659	10862547			10862547	12213363	13411268				122.876	110.525	124.831			119.616	134.491	147.682
	8337628	5059575	10195689			10195689	7509789	15457740				95.8148	58.1439	117.167			112.273	82.6964	170.218
	9288759	5670385	11015279			11015279	8334985	11845937				106.745	65.1632	126.586			121.298	91.7833	130.445
	15921400	7672668	15672311			15672311	8302742	30229562				182.966	88.1732	180.104			172.58	91.4282	332.882
	9299054	6715755	12912157			12912157	6450820	18226549				106.863	77.1765	148.385			142.186	71.0352	200.707
	10811853	6088833	9195068			9195068	15456591	26774737				124.248	69.972	105.668			101.254	170.205	294.838
		6251330	11018448			11018448	7397953	12015967					71.8394	126.622			121.333	81.4648	132.318
	8892443	8033504	4904328			4904328	12281716	9321745				102.191	92.3199	56.3598			54.0055	135.244	102.649
	14121307	7915107	7218131			7218131	14756144	16797796				162.28	90.9593	82.9497			79.4847	162.492	184.974
	6485710	4923577	7595676			7595676	6089425	10188667				74.5328	56.581	87.2884			83.6421	67.0556	112.196
	11007463	5146846	9443893			9443893	8164932	11239650				126.496	59.1468	108.528			103.994	89.9107	123.769
	12934693	4338234	9885161			9885161	6568237	16392841				148.644	49.8544	113.599			108.854	72.3282	180.515
	18598917	4985243	5868821			5868821	3763914	13656933				213.736	57.2897	67.4436			64.6263	41.4475	150.388
	8526355	12106419	9237405			9237405	16374573	9357835				97.9836	139.125	106.155			101.721	180.314	103.047
	8905313	10357238	18323658			18323658	10703430	14699003				102.339	119.024	210.573			201.777	117.864	161.863
	5463504	7801574	21126102			21126102	9916604	18227895				62.7858	89.6546	242.778			232.637	109.2	200.722
	9522813	7133632	10793302			10793302	7242401	20555446				109.435	81.9787	124.035			118.854	79.7519	226.353
	12929186	6795447	9083643			9083643	16884780	7915692				148.58	78.0923	104.388			100.027	185.932	87.1661
	8737084	15092742	5989566			5989566	14992021	9160073				100.405	173.444	68.8312			65.956	165.089	100.869
	5891145	3401732	6736791			6736791	11933523	19637102				67.7002		77.4182			74.1843	131.41	216.24
	14090613	7370562	6164132			6164132	15940323	19469768				161.927	84.7014	70.8373			67.8782	175.532	214.397
	16980033	4396662	8122227			8122227	13141092	9710326				195.132	50.5258	93.3394			89.4404	144.707	106.928
	9991668	7899265	7933930			7933930	10631946	6676415				114.823	90.7772	91.1756			87.3669	117.077	73.5194
	7725026	5642411	9672094			9672094	21676391	20705417				88.7749	64.8418	111.15			106.507	238.696	228.004
	4727945	9129252	10280468			10280468	24712079	14133145				54.3329	104.912	118.142			113.207	272.125	155.631
	3772075	7982604	5458592			5458592	12967381	14014385				43.3481	91.7349	62.7293			60.109	142.794	154.324
	17970842	6296290	5925960			5925960	11141016	11419589				206.518	72.356	68.1003			65.2555	122.683	125.75
	5337473	4904788	7023402			7023402	9722343	13223584				61.3375	56.3651	80.7119			77.3404	107.061	145.616
	5246713	8404505	7826263			7826263	7188078	19653179				60.2945	96.5833	89.9383			86.1813	79.1537	216.417
	5473423	11151230	8710814			8710814	6836190	28631072				62.8998	128.148	100.103			95.9218	75.2788	315.28
	8402490	13632735	8359949			8359949	10748495	11418728				96.5602	156.665	96.0713			92.0582	118.36	125.741
	6946455	10024091	17246652			17246652	9887275	14972345				79.8276	115.195	198.196			189.917	108.877	164.873
	4081712	12220338	8011694			8011694	15825834	11303993				46.9064	140.434	92.0692			88.2232	174.271	124.477
	8037010	8664453	9123702			9123702	10512087	6183265				92.3601	99.5706	104.848			100.468	115.757	68.0889
		9447323	8994581			8994581	9152478	6835366					108.567	103.364			99.0466	100.785	75.2697
	11621199	12206517	6585025			6585025	10514954	12096018				133.549	140.276	75.6741			72.513	115.789	133.199
	8570340	8121475	9500774			9500774	18811140	17226408				98.4891	93.3308	109.182			104.621	207.145	189.694
		13756468	3916996			3916996	13731412	17942394					158.087	45.0135			43.1332	151.208	197.578
	6090674	7020383	6172598			6172598	10870118	26624848				69.9931	80.6772	70.9346			67.9715	119.7	293.188
	8235953	10532955	7338163			7338163	17700989	35244342				94.6464	121.043	84.3291			80.8065	194.92	388.104
	5229984	9136663	8063653			8063653	16623032					60.1022	104.997	92.6663			88.7954	183.05
	6934531	7381798	13322146			13322146	25254340					79.6906	84.8305	153.096			146.701	278.096
	3993386	5084750	7902681			7902681	14259149					45.8914	58.4332	90.8165			87.0228	157.019
	5951653	10712775	6840477			6840477	15515687					68.3955	123.11	78.6098			75.326	170.856
	6806744	8608845	7343990			7343990	9073914					78.2221	98.9316	84.3961			80.8706	99.9202
	3808358	7517295	8772595			8772595	9008724					43.7651	86.3877	100.813			96.6021	99.2024
	5198556	4808778	8751128			8751128	8894890					59.741	55.2618	100.567			96.3658	97.9488
	11581628	6962947	12328437			12328437	13313460					133.094	80.0172	141.677			135.758	146.605
	12182509	6072415	6808468			6808468	10899193					140	69.7833	78.2419			74.9736	120.02
	8236034	6210214	6318446			6318446	11904906					94.6473	71.3669	72.6107			69.5775	131.095
	6222507	5183493	7856701			7856701	6106333					71.5081	59.5679	90.2881			86.5165	67.2418
	9476299	8276581	11082158			11082158	12896951					108.9	95.1133	127.355			122.035	142.019
	7082999	6241334					7790412					81.3968	71.7245					85.7865
	5930521	8366887					8542621					68.1527	96.151					94.0697
	7554072	13962484					10000457					86.8103	160.455					110.123
	11064246	11865375					8167280					127.149	136.355					89.9365
	7610293	11410730					5531389					87.4564	131.13					60.9106
	7525589	8012789										86.483	92.0818
	11266414	7806580										129.472	89.7121
	8706426	9004277										100.053	103.476
	8491281	7985069										97.5806	91.7632
	7551084	6661935										86.776	76.558
	14954474	7252262										171.855	83.3419
		7689973											88.372
		4835863											55.573
		4186992
		3392051
		12884293											148.064
		6317935											72.6048
		7541622											86.6672
		7726474											88.7915
		6071995											69.7785
		9818011											112.827
		9231486											106.087
		9229912											106.069
		6061314											69.6557
		8743928											100.484
22.02.2022	3790611	7181173	4726635	3450313	6251720	6778930		17315116	6432700	7278511		86.463	163.801	107.814	78.7009	142.6	83.9044		214.313	79.619	90.0878
	4946940	4421100	7395165	3968768	7415954	5363822		13162559	8061580	4653224		112.839	100.844	168.682	90.5268	169.156	66.3893		162.916	99.7801	57.594
	5191599	5322560	6473717	4224160	5766836	10862655		16617921	7641775	6426741		118.419	121.406	147.664	96.3522	131.54	134.45		205.684	94.584	79.5453
	6217151	4454415	7656457	4313152	7175941	8127593		19259967	7928513	4713588		141.812	101.604	174.642	98.3821	163.682	100.597		238.385	98.1331	58.3412
	3277647	4615427	9257953	4493476	5962273	11315660		18620694	10229646	4719452		74.7624	105.277	211.172	102.495	135.998	140.057		230.473	126.615	58.4138
	3118566	8793853	11449870	3971552	4742279	8432095		17088979	5898870	8291357		71.1338	200.586	261.169	90.5903	108.17	104.366		211.514	73.0117	102.624
	4858791	5804806	10283667	3242532	8381643	7338744		27330638	6111494	6450323		110.828	132.406	234.568	73.9615	191.184	90.8334		338.278	75.6434	79.8372
	4295388	9797192	6461163	4404069	4810946	5885438		22709107	14758450	4837703		97.9769	223.472	147.378	100.456	109.737	72.8454		281.076	182.669	59.8774
	3198583	4575971	10717244	3126502	7577350	6207509		24679359	8655555	4201965		72.959	104.377	244.458	71.3149	172.838	76.8318		305.462	107.132	52.0087
	4892847	5936883	8678229	3643486	4987970	7479049		19648414	8625028	5443470		111.605	135.419	197.949	83.1071	113.775	92.5699		243.193	106.754	67.3751
	4323618	4156980	7355383	5892026	3870377	5141180		17405646	7986605	9575861		98.6208	94.8198	167.775	134.396	88.2825	63.6336		215.434	98.8521	118.523
	5165346	4040733	6319481	3746539	6032187	5933892		27582107	8872966	7654623		117.82	92.1683	144.146	85.4578	137.593	73.4452		341.39	109.823	94.7431
	6047311	7558834	6981476	3669897	4692777	7236143		24741625	11099174	5275384		137.938	172.415	159.246	83.7096	107.041	89.5634		306.233	137.377	65.2947
	5116105	6395557	6685959	3848497	6875347	6121439		23252999	16209365	3213204		116.697	145.881	152.505	87.7834	156.825	75.7665		287.808	200.627	39.7706
	4359974	5067062	5486062	3782867	6384813	6032275		18080728	8997911	5036297		99.4501	115.579	125.136	86.2864	145.636	74.6629		223.789	111.369	62.3354
	5731741	4080692	11291754	4989096	6260753	9674586		12604127	9662415	10729937		130.74	93.0797	257.563	113.8	142.806	119.745		156.004	119.594	132.807
	5857178	4395385	16538003	3991863	8425077	6961401		13388006	10851789	8580926		133.601	100.258	377.228	91.0536	192.174	86.1629		165.706	134.315	106.208
	3630119	6400279	9249141	3511096	5798928	6167389		20944453	6989222	8304723		82.8022	145.989	210.971	80.0874	132.272	76.3352		259.234	86.5072	102.79
	5281244	4726806	14887121	5004320	5745411	6154950		19764392	7447182	7428096		120.464	107.817	339.572	114.147	131.052	76.1813		244.629	92.1755	91.9393
	5313293	8896954	8809866	3523423	6401996	5118216		19369333	10117714	8719694		121.195	202.938	200.951	80.3685	146.028	63.3494		239.739	125.229	107.926
	5350156	4708821	5596277	4419880	2655794	10506535		23007647	10627520	8826967		122.036	107.407	127.65	100.817	60.5781	130.042		284.771	131.539	109.253
	4062334	4783670	11361897	4582116	3832890	6224639		12239429	11866355	6669581		92.661	109.115	259.162	104.517	87.4274	77.0438		151.49	146.873	82.551
	3107613	8250244	8793404	7704807	3758122	5374115		13754427	10447391	7769593		70.884	188.186	200.576	175.745	85.722	66.5167		170.242	129.31	96.1661
	3043506	5849633	11137429	4215491	3659489	6934024		10431839	12317351	8576416		69.4217	133.429	254.042	96.1545	83.4722	85.824		129.117	152.455	106.152
	2919258	4131513	9143675	5361415	3313370	5633429		17193384	12188290	5055379		66.5877	94.2389	208.565	122.293	75.5773	69.7263		212.807	150.857	62.5716
	3160032	4229309	13569734	4997658	4463619	5851262		16551083	19307395	4439639		72.0797	96.4696	309.523	113.996	101.814	72.4224		204.857	238.972	54.9505
	2810422	3247374	7339854	4099932	4227696	5558592		14412320	15956460	4670091		64.1051	74.0719	167.421	93.5186	96.4329	68.8		178.385	197.497	57.8028
	1971131	5149508	9878002	4796232	3426380	8254138		11490835	8987587	2988889		44.9611	117.459	225.315	109.401	78.155	102.163		142.225	111.241	36.9942
	2223454	5107151	9569364	3618752	5267474	9993813		10173198	8492745	8621025		50.7165	116.493	218.275	82.543	120.15	123.696		125.916	105.117	106.704
	4654585	6693952	6618939	4797585	4542034	8546453		14397059	18444266	10881882		106.17	152.688	150.977	109.432	103.603	105.781		178.196	228.289	134.688
	4838108	3851482	9117403	4231836	3050683	7367582		12799061	13185620	4634810		110.356	87.8515	207.966	96.5273	69.5854	91.1903		158.417	163.202	57.3661
	7027576	4263388	8451673	2541555	3389091	7177074		20721596	12688627	5874126		160.298	97.247	192.781	57.9723	77.3045	88.8323		256.476	157.05	72.7054
	6092454	4207340	9480616	3342837	5229620	6857806		15971218	18454390	7382304		138.968	95.9685	216.251	76.2494	119.287	84.8807		197.68	228.414	91.3725
	4384014	4571941	12274792	2766986	3257352	8041713		11906760	10608980	17099314		99.9984	104.285	279.985	63.1144	74.2995	99.5342		147.373	131.31	211.642
	4604368	4323832	7573820	2841594	4821476	9253067		15246923	11136234	11379566		105.025	98.6257	172.757	64.8162	109.977	114.527		188.715	137.836	140.848
	4575437	5678818	7651133	4485340	4615245	8232617		13501648	17238892	6902329		104.365	129.533	174.521	102.31	105.273	101.897		167.113	213.37	85.4317
	5854268	6102210	6893889	2661726	5405174	7242789		28573962	14765221	7647952		133.535	139.19	157.248	60.7134	123.291	89.6457		353.667	182.753	94.6605
	5200740	4635918	6106046	2739381	5444067	8727238		18560663	11192448	5604622		118.628	105.744	139.278	62.4847	124.178	108.019		229.73	138.532	69.3697
	4003923	3946116	4384772	2476121	3477779	7700271		17229415	10462238	7171796		91.3286	90.0101	100.016	56.4798	79.3274	95.3081		213.253	129.494	88.767
	5431979	6382235	5810677	2159430	4615917	10539034		21399996	17165842	7065255		123.902	145.577	132.54	49.2561	105.288	130.444		264.873	212.466	87.4483
	4197598	7775195	8529598	3906678	6068268	8790728		14179018	15598534	7395148		95.7463	177.351	194.558	89.1105	138.416	108.805		175.497	193.067	91.5315
	3410552	5694537	12731171	1711396	6265130	6610418		13028931		10628214		77.794	129.891	290.395	39.0366	142.906	81.8187		161.262		131.548
	3432618	3927663	6573779	2343699	4360439	9410623		14558218		8648011		78.2973	89.5892	149.947	53.4593	99.4607	116.477		180.19		107.038
	2805126	5920428	5955924	3905290	7981012	11050742		8316628		6407370		63.9843	135.044	135.853	89.0788	182.045	136.778		102.937		79.3055
	6760916	2854600	5108019	4903983	6838713	11063985		12423395		8978861		154.215	65.1128	116.513	111.859	155.99	136.942		153.767		111.133
	7807272	8532985	4943321	4542359	5032331	7938375		13321032		9175185		178.082	194.636	112.756	103.61	114.786	98.2551		164.878		113.563
	6548872	3292562	7815077	4206216	6013384	7752628				8155011		149.378	75.1026	178.26	95.9429	137.164	95.9561				100.936
	4220889	9229185	7419248	4033707	6932576	14823584				7880394		96.2776	210.516	169.231	92.008	158.131	183.475				97.5375
	6922383	5326041	15854136	4992975	6405772	8759356				9771218		157.898	121.486	361.629	113.889	146.114	108.417				120.941
	4127306	3865134	6821329	5756969	4416203	7855399				10129121		94.143	88.1629	155.593	131.315	100.733	97.2281				125.371
	4463545	6238849	9227790	4883290	4265793	10703169				9878950		101.813	142.307	210.484	111.387	97.3018	132.476				122.274
	6567742	5534874	6022341	4877926	4002711	11086947				3699419		149.809	126.249	137.368	111.264	91.301	137.226				45.7886
	4874279	4927775	5884565	4895557	7160569	5981662				8558570		111.181	112.402	134.226	111.667	163.331	74.0364				105.931
	3612429	3781079	11657563	3118946	4197563	7295017				9051192		82.3987	86.2456	265.907	71.1425	95.7455	90.2921				112.029
	2093994	6066703	8578075	3158672	3599670	7243958				12446916		47.7636	138.38	195.664	72.0486	82.1077	89.6602				154.058
	5876095	4716871	5123763	4768330	3972306	5350585				5119462		134.032	107.591	116.872	108.765	90.6075	66.2254				63.3648
	4375084	5232356	4357397	4405960	4729569	7640388				8975404		99.7947	119.349	99.3913	100.499	107.88	94.5669				111.091
	2980213	3824189	5211087	5071844	5307220	6632589				7995111		67.978	87.2289	118.864	115.688	121.057	82.0931				98.9574
	3108968	2105257	8316607	7595689	5870796	10355272				5260993		70.9149		189.7	173.256	133.912	128.17				65.1165
	3019337	4369928	6359210	2761262	6020435	12015888				4411774		68.8704	99.6771	145.052	62.9838	137.325	148.723				54.6056
	4423110	3337923	7301678	3408631	4714514	11300320						100.89	76.1373	166.55	77.7502	107.537	139.867
	3568349	3936883	10179502	4487182	4655170	6951842						81.3933	89.7995	232.192	102.352	106.183	86.0446
	3754145	5897441	7943313	4231573	5146913	8022126						85.6313	134.519	181.185	96.5213	117.4	99.2917
	4396668	4374037	11846577	3744093	3183870	13137702						100.287	99.7709	270.218	85.402	72.6234	162.608
	3911901	3817418	5256954	4011475	3058763	11101285						89.2296	87.0745	119.91	91.5009	69.7697	137.403
	3832780	3274868	5556554	5224467	3558622	12318126						87.4249	74.699	126.744	119.169	81.1714	152.464
	3463035	3022561	4422327	4505927	2667489	6897468						78.9911	68.944	100.872	102.779	60.8449	85.3716
	4059824	4093462	6120102	4958326	4043335	4956429						92.6037	93.371	139.598	113.098	92.2276	61.3469
	3902128	3075375	5286355	4463634	2361174							89.0067	70.1487	120.581	101.815	53.8579
	4046929	3661736	5631669	5876545	3583317							92.3096	83.5234	128.457	134.043	81.7347
	3775745	4669132	5699153	8754054	3377344							86.1239	106.502	129.996	199.678	77.0365
	5615155	3444698	7414307	7754397	3029228							128.081	78.5728	169.119	176.876	69.0961
	3987041	4313615	12289801	3450482	2754608							90.9436	98.3926	280.328	78.7048	62.832
	4059991	2712789	12480332	2975022	4521998							92.6075	61.8781	284.674	67.8596	103.146
	5781757	2725114	9735600	2224718	4517196							131.881	62.1593	222.067	50.7453	103.036
	3646850	4567430	4377590	2281704	4408168							83.1839	104.182	99.8519	52.0452	100.549
	3849132	3625172	3293779	3992715	5377006							87.7979	82.6894	75.1304	91.073	122.648
	6058462	4963485	8238642	4119140	4627259							138.192	113.216	187.922	93.9567	105.547
	3853682	3428683	8609785	1639664	3558578							87.9017	78.2075	196.387	37.4004	81.1704
	3816136	4763886	8294647	1954380	3867798							87.0453	108.663	189.199	44.579	88.2237
	3439839	4283362	5372358	2271917	5943536							78.462	97.7026	122.542	51.8219	135.571
	3176366	4187513	12605769	2123099	4031057							72.4522	95.5163	287.535	48.4274	91.9476
	3413552	4769659	5220170	1933495	9869148							77.8624	108.795	119.071	44.1026	225.113
	3295739	3287462			10065981							75.1751	74.9863			229.603
					7802873											177.982
					6123943											139.686
					4218984											96.2341
					7904346											180.296
					5038966											114.938
					4329533											98.7557
					4800612											109.501
					2926195											66.7459
					4484925											102.3
					3461127											78.9476
					6307944											143.883
					6882243											156.983
					6876826											156.859
					3350660											76.4278
												100	110.926	165.856	99.2969	100.471	100	228.705	225.484	184.818	115.036
												33.879	37.7447	69.137	35.6021	38.6071	30.8034	137.017	102.676	70.5947	53.1731
												1.95928	2.03802	4.57871	2.23388	2.29902	1.89224	9.83726	6.8603	5.09474	3.61797
													0.000137233	1.03986e-39	0.812284	0.875668		9.56275e-41	3.07589e-60	2.14039e-52	0.000121584
													***	***				**	***	***	***

## Sheet: IF 6-4 average
	siMock					siXAB2						siMock					siXAB2
	No UV	1h	2h	4h	16h	No UV	1h	2h	4h	16h		No UV	1h	2h	4h	16h	No UV	1h	2h	4h	16h
29.04.2022	2698300	16751166	12373060	10355664	3025778	7890328	13510435	13016152	16077198	3662044		172.128	1068.58	789.293	660.601	193.018	160.84	275.403	265.328	327.725	74.6489
	1157747	9052804	11872560	5826271	2783578	8256633	21632606	18130911	21767724	3525600		73.8541	577.49	757.365	371.665	177.568	168.307	440.97	369.589	443.724	71.8675
	1869008	17383869	16885280	10582191	2590261	9232861	22630372	25893655	17706896	3742217		119.226	1108.94	1077.13	675.051	165.236	188.207	461.308	527.829	360.946	76.2832
	1523700	11718682	11621378	8797940	2665478	4788318	20860767	15280129	21353084	5744601		97.1987	747.549	741.342	561.231	170.034	97.6074	425.236	311.478	435.272	117.101
	2798377	15556712	12664256	9976013	2507417	5386437	15116383	15158884	18846993	8777226		178.512	992.382	807.869	636.382	159.951	109.8	308.14	309.006	384.186	178.919
	1652529	12322103	13557089	15119277	3970990	7302136	16476310	10652022	15511149	1732143		105.417	786.042	864.823	964.477	253.314	148.85	335.861	217.136	316.187	35.3088
	2075082	10220763	22393425	10827882	2284479	6687836	20734207	11698208	18927768	1345728		132.372	651.995	1428.5	690.724	145.73	136.328	422.656	238.462	385.833	27.432
	1091326	10749269	9725735	9753180	2424694	5794092	16493082	8790910	14007909	3413077		69.617	685.709	620.417	622.167	154.674	118.11	336.203	179.198	285.544	69.5738
	1476255	8374060	9601920	7677316	1868059	4710587	19820503	11602004	25938342	2233286		94.1721	534.192	612.518	489.745	119.166	96.0229	404.031	236.501	528.74	45.5244
	1665887	10661289	10579601	7276105	1917628	7350202	18608386	16460937	14602661	3452850		106.269	680.097	674.886	464.152	122.328	149.83	379.322	335.548	297.668	70.3846
	1521196	9750190	10005640	8690828	1468710	8847346	21794335	12810324	10368162	4122391		97.039	621.977	638.272	554.399	93.6908	180.349	444.266	261.132	211.35	84.0328
	1821805	9370751	11039294	10172819	1367220	10401957	17975278	10171068	29705121	4623594		116.215	597.772	704.21	648.937	87.2167	212.039	366.417	207.332	605.524	94.2496
	2784151	13063800	10947363	5746990	3034164	6192541	11642628	13514807	11569479	3947482		177.604	833.356	698.346	366.608	193.553	126.232	237.329	275.492	235.838	80.4674
	1755457	15484553	11518462	12197460	3004128	6047121	15956312	14408784	11052731	2959190		111.983	987.779	734.777	778.091	191.637	123.267	325.261	293.716	225.304	60.3216
	1798567	13225201	11282217	13481508	3566941	3825809	15240585	17958220	6856275	3849224		114.733	843.652	719.707	860.002	227.54	77.9871	310.671	366.069	139.762	78.4644
	1714126	12613861	10036616	10843494	2118215	3787063	15162486	16707716	12417643	5901851		109.346	804.654	640.248	691.72	135.124	77.1973	309.079	340.578	253.127	120.306
	1807188	11467308	9265877	11889373	2617427	4595094	11561902	13181285	13150628	1812026		115.283	731.514	591.082	758.438	166.969	93.6686	235.683	268.694	268.069	36.9372
	1633779	7380053	10755196	9318413	2585435	4685517	27103428	12717962	10812965	2019080		104.221	470.783	686.087	594.433	164.928	95.5119	552.489	259.249	220.417	41.1579
	2282696	14175727	20691630	5995473	1997916	3269596	18855672	10185361	9979513	3989198		145.616	904.287	1319.94	382.459	127.45	66.649	384.363	207.623	203.427	81.3177
	956292	11095492	14256483	5321472	5018079	1942308	12496911	17707178	16796304	6175721		61.003	707.795	909.439	339.463	320.109	39.5929	254.743	360.952	342.384	125.889
	1283547	6557462	11410976	15097017	2215890	4519300	16941664	17599380	19275617	3772954		81.879	418.309	727.92	963.057	141.354	92.1236	345.347	358.754	392.924	76.9097
	1726135	11354403	11400860	4100188	1800638	1879680	21501192	14616547	9306474	2715526		110.112	724.311	727.275	261.556	114.865	38.3163	438.291	297.951	189.708	55.3546
	2703825	8864647	14063612	7198600	911497	2240353	22152205	18115797	9857694	7106372		172.48	565.487	897.135	459.208	58.1455	45.6684	451.561	369.281	200.944	144.86
	1234194	9914995	15061935	7882740	1873998	3428773	22794660	7648284	6551274	7596131		78.7308	632.49	960.819	502.85	119.545	69.8938	464.657	155.906	133.544	154.843
	1456787	6869312	10699923	6820021	3150137	2353461	12984785	15493148	7162681	6848213		92.9302	438.202	682.561	435.058	200.951	47.9741	264.688	315.82	146.008	139.597
	2199149	10347153	12500841	6165465	3215349	2117503	10040512	9849170	17207911	5185964		140.286	660.058	797.444	393.303	205.111	43.1642	204.671	200.77	350.774	105.713
	1725571	13124957	11668783	7928661	1128276	2503784	16801980	8870814	11793354	3027334		110.076	837.257	744.366	505.779	71.9741	51.0383	342.5	180.827	240.401	61.7106
	1466456	12373393	13420595	8246168	1217717	1907175	21801523	10072781	25667576	6171148		93.547	789.314	856.116	526.033	77.6797	38.8768	444.413	205.328	523.22	125.796
	1194014	6828250	10780621	7098752	1859521	1481545	12587915	14436627	16278776	7248239		76.1676	435.583	687.709	452.838	118.621	30.2005	256.598	294.283	331.834	147.752
	1333201	9067793	10743115	15830052	1855936	3401263	19572025	17852436	12600096	5117507		85.0465	578.446	685.317	1009.82	118.392	69.333	398.966	363.913	256.846	104.318
	1031248	10070579	11019981	8306488	3091641	2034602	11753623	9377713	13499863	7627592		65.7846	642.415	702.978	529.881	197.22	41.4743	239.592	191.16	275.188	155.485
	1692498	9938564	8035658	11203821	2504056	2169884	22364246	28135796	11916631	5358414		107.967	633.993	512.605	714.706	159.737	44.232	455.884	573.534	242.914	109.229
	1646652	10647175	8436680	8820650	5536849	1918722	8364525	21533758	7816462	7817082		105.042	679.196	538.186	562.68	353.202	39.1122	170.507	438.955	159.335	159.347
	773053	9962721	9565890	8025513	2823549	1406293	11096390	24188346	11886318	9016967		49.314	635.534	610.22	511.957	180.118	28.6666	226.194	493.067	242.296	183.806
	1115800	9779383	7717458	7263259	4220906	1631916	22545583	23611085	21103455	7555877		71.1783	623.839	492.306	463.332	269.257	33.2658	459.58	481.3	430.183	154.023
	2027865	7064410	7702076	6449943	4267261	1846782	19178674	22512952	11295586	5593127		129.36	450.647	491.325	411.45	272.214	37.6457	390.947	458.915	230.255	114.013
	1620561	11893651	9966796	8897657	2820510	1170431	16903943	21098708	11070391	5280047		103.378	758.711	635.794	567.593	179.924	23.8586	344.578	430.086	225.664	107.631
	1721950	9822117	6285246	8826100	1924595	4724588	20353903	12948586	8190958	6870340		109.845	626.565	400.944	563.028	122.772	96.3083	414.904	263.95	166.968	140.048
	2559635	8499441	7640969	10790367	2453295	3114574	16913661	23819384	11468184	3780068		163.282	542.19	487.427	688.331	156.499	63.489	344.776	485.546	233.773	77.0547
	1686289	6589388	8650488	9849359	3912570	2554956	25826209	15405084	22156323	2943551		107.57	420.345	551.825	628.303	249.588	52.0815	526.454	314.025	451.645	60.0028
	2089186	6519102	8379382	7408394	3152958	991167	19860853	18150358	11271729	3489776		133.272	415.862	534.531	472.591	201.131	20.2044	404.853	369.986	229.768	71.1373
	1904700	11182170	12307379	8829477	3457043	1332471	24333848	18219115	8565385	3328898		121.503	713.324	785.103	563.243	220.529	27.1617	496.033	371.387	174.601	67.8579
	1564091	10025462	10893790	8098884	3391573	1116241	22949368	10352394	11395879	3323552		99.7753	639.537	694.928	516.638	216.353	22.754	467.811	211.028	232.299	67.7489
	1528118	9750634	9582861	7093445	3528251	4849698	10576248	12767212	15586281	2027187		97.4805	622.005	611.303	452.5	225.071	98.8586	215.591	260.253	317.718	41.3232
	1763174	16693114	18995570	5716339	2621724	5354704	21577878	14249316	11255028	5222923		112.475	1064.87	1211.75	364.652	167.243	109.153	439.854	290.465	229.428	106.467
	1474844	9844297	8918785	8054532	3635623	3848584	20916801	20048229	8578907	2996381		94.0821	627.98	568.94	513.809	231.921	78.4514	426.378	408.673	174.877	61.0797
	2144016	10675750	8230485	15445260	2904150	3368713	16841055	12913338	8192284	3262577		136.769	681.019	525.033	985.272	185.259	68.6695	343.296	263.232	166.995	66.506
	2059896	11395988	8553950	5482789	2399222	6879614	21437158	8699154	7229629	8208646		131.403	726.964	545.667	349.754	153.049	140.237	436.985	177.328	147.372	167.329
	1975532	14650931	8401023	6352595	3094099	4140738	19572582	8786701	8194975	3595534		126.022	934.601	535.912	405.24	197.376	84.4068	398.977	179.112	167.05	73.2931
	2050310	10011789	8760204	9587820	2328382	7620134	13468568	19994857	13275024	2471077		130.792	638.664	558.824	611.619	148.53	155.333	274.55	407.585	270.605	50.3716
	1805967	8932927	9334181	8991648	1850608	4277620	11621166	10902398	11404461	4103581		115.205	569.842	595.439	573.588	118.053	87.1971	236.891	222.24	232.474	83.6494
	1875389	11659479	12596379	8068170	1627924	4035418	14247410	24070468	12160737	2447659		119.633	743.773	803.539	514.679	103.847	82.2599	290.426	490.664	247.89	49.8943
	1193201	7891069	10658450	5968702	2151999	5919794	16250159	16321741	22508211	5097072		76.1158	503.381	679.916	380.751	137.279	120.672	331.251	332.71	458.818	103.901
	1489736	10726674	9487218	7509583	1961850	9882906	14708770	10518771	8365761	6177814		95.0321	684.268	605.201	479.046	125.149	201.458	299.831	214.42	170.532	125.932
	1556965	12820214	12006606	7616403	4777577	6438341	14674891	10867905	12985714	2505709		99.3207	817.817	765.916	485.86	304.768	131.242	299.14	221.537	264.707	51.0776
	1329705	11632223	11645452	4950340	1991012	3169971	9873692	10245468	17857188	9033180		84.8235	742.034	742.878	315.788	127.009	64.6182	201.27	208.849	364.01	184.137
	1021524	10817839	10979965	6411336	2479808	7360569	17074684	11503216	12616075	4232775		65.1643	690.083	700.426	408.987	158.19	150.041	348.059	234.487	257.172	86.2829
	1645441	14147841	10502094	10181558	1647308	3842283	16476247	5091642	21421657	3841554		104.965	902.508	669.942	649.494	105.084	78.323	335.86	103.79	436.669	78.3081
	1148036	9104159	12134930	7283655	2621423	4212687	22036385	7358354	18193204	3103058		73.2346	580.766	774.102	464.633	167.224	85.8735	449.2	149.996	370.859	63.2542
	963891	6787494	8525836	8230657	3401725	3931287	13332794	9371677	23286195	3801392		61.4878	432.983	543.874	525.044	217	80.1373	271.782	191.037	474.677	77.4894
	1543859	7415684	9031315	6950664	3381744	3240516	17261731	20876425	8603180	4373393		98.4847	473.056	576.119	443.391	215.726	66.0562	351.871	425.555	175.371	89.1494
	1727159	10777877	15743685	5442267	3503248	3308681	20157268	21090252	9853624	2371680		110.178	687.534	1004.31	347.169	223.477	67.4458	410.896	429.914	200.861	48.3455
	1696896	10176141	10926296	6289771	1844881	6583018	13589734	10553352	18054702	6487443		108.247	649.149	697.002	401.232	117.687	134.191	277.02	215.125	368.036	132.243
	1278078	6521371	9881915	7790199	3764325	1930435	19622886	16377069	22356252	2664234		81.5302	416.006	630.38	496.946	240.131	39.3509	400.002	333.838	455.721	54.309
	1863798	5516139	10726467	6560001	2442380	4300742	23301346	9575435	10568690	3298492		118.894	351.881	684.255	418.471	155.802	87.6684	474.986	195.19	215.437	67.2381
	1079320	7687006	14792169	7302081	3232343	4597212	15704263	8828039	18498079	2020050		68.8512	490.364	943.611	465.809	206.195	93.7118	320.123	179.955	377.074	41.1777
	1005463	5593499	5387156	6865727	2791452	8784800	11914812	8198612	15114942	2957521		64.1397	356.816	343.653	437.973	178.07	179.074	242.877	167.124	308.11	60.2875
	1142798	8484962	5355184	10479055	3193965	8848089	17392401		10085746			72.9005	541.266	341.614	668.472	203.747	180.364	354.535		205.593
	981374	8591872	7254779	10748226	2644191	8500894	26055949					62.6031	548.086	462.791	685.643	168.676	173.286	531.137
	2336569	7731771	10497463	7348503	1880129	5570912	11131616					149.053	493.219	669.646	468.77	119.936	113.56	226.912
	1619184	6621582	6643909	7694287	2601801	6158869	13149947					103.29	422.399	423.823	490.828	165.972	125.545	268.055
	1378267	7373965	10650820	5602914	1808230	6138111	13983536					87.9214	470.394	679.429	357.417	115.349	125.122	285.047
	1355331	8619232	6005920	7421512	1799541	5524646	22186634					86.4582	549.831	383.125	473.427	114.795	112.617	452.263
	2221235	8623222	8335053	11545884	2984588	6762652	17883783					141.695	550.086	531.703	736.526	190.391	137.853	364.552
	1685887	9108068	9274701	10839492	1129709	5079038	10521521					107.545	581.015	591.645	691.465	72.0655	103.534	214.476
	902248	11168834	14860496	11837886	4214856	8639600						57.5555	712.474	947.969	755.153	268.871	176.114
	916484	10819744	11989747	8737177	2614237	9114333						58.4636	690.205	764.841	557.355	166.765	185.791
	789403	9426913	21366451	8770762	2029421	8824756						50.357	601.354	1362.99	559.498	129.459	179.888
	994509	8331908	12385553	5849221	1689514	7706413						63.441	531.503	790.09	373.129	107.776	157.091
	1067972	13038480	10308008	7121121	1369829	10185299						68.1273	831.741	657.561	454.265	87.3831	207.622
	2009819	11107049	13090707	5689812	4342166	5589712						128.209	708.532	835.072	362.96	276.992	113.943
	1427587	10921977	10426351	8887953	2782258							91.0675	696.726	665.11	566.974	177.484
	1738799	12008096	9624458	5929291	4999371							110.92	766.011	613.956	378.237	318.916
	1864676	9971033	11334479	10186069	2764464							118.95	636.065	723.04	649.782	176.349
	1375556	8104301	10498663	6188211	2039918							87.7484	516.983	669.723	394.754	130.129
	924332	10029508	12147428	9418343	1967087							58.9643	639.795	774.899	600.808	125.483
	1045379	13205835	12963641	8459122								66.686	842.417	826.967	539.618
	955200	7445123	14704961	5081311								60.9334	474.934	938.048	324.143
	1186995	5768693	12012637	6987624								75.7199	367.992	766.301	445.749
	1306186	6974220	13608770									83.3232	444.894	868.12
	1208189	7968997	22446196									77.0719	508.352	1431.87
	1162878	9744005	9187150									74.1814	621.582	586.06
	1456881	8095106	11380249									92.9362	516.397	725.96
	1241735		9093733									79.2118		580.1
			7035110											448.778
			8438481											538.301
			8782382											560.239
			10067152											642.196
31.03.2022	1116640	15796785	11277738	6481742	3596967	3377230	14804989	15813173	16545509	6788800		55.7743	789.024	563.305	323.752	179.663	85.2441	373.69	399.138	417.623	171.355
	1451379	15264581	6619809	8259737	4702581	3100456	17340320	21832406	17568733	7543411		72.494	762.441	330.649	412.56	234.886	78.2581	437.684	551.068	443.45	190.402
	2810952	9453617	4940760	6242009	4189219	3957721	18192893	25944119	20869486	6629415		140.402	472.193	246.783	311.778	209.245	99.8962	459.204	654.851	526.763	167.332
	1347816	13346221	6317285	7680657	3615856	2000657	9945296	19165525	19974695	6926861		67.3212	666.622	315.538	383.636	180.606	50.4983	251.028	483.754	504.178	174.84
	2521611	9694621	8330600	6257729	8948676	3501549	8489136	25414618	8461721	5853777		125.95	484.23	416.1	312.563	446.972	88.382	214.273	641.486	213.581	147.754
	975721	10273099	8754154	6563339	5230879	4408262	9819144	9429680	7731485	5882971		48.7357	513.125	437.256	327.828	261.274	111.268	247.843	238.013	195.149	148.491
	3362625	9324328	7195261	5020557	4685736	3965791	8498856	12794047	19331961	4772437		167.958	465.735	359.392	250.769	234.045	100.1	214.518	322.933	487.955	120.46
	2528763	10565349	5989400	7541490	4077401	2177929	16669590	10896552	22864143	5385281		126.308	527.722	299.161	376.685	203.66	54.9728	420.754	275.038	577.11	135.929
	2289062	15936781	5312047	7970800	4732611	4379442	8843214	21751467	9768557	5959368		114.335	796.016	265.328	398.128	236.386	110.541	223.21	549.025	246.567	150.419
	1471955	11387260	5676318	6725320	4484000	2655993	11589063	21346654	11450346	7414145		73.5218	568.775	283.523	335.919	223.968	67.0395	292.518	538.808	289.016	187.139
	1350570	14125490	5295541	8795520	5628304	5251121	7863572	16284311	13996219	5107159		67.4588	705.545	264.504	439.322	281.125	132.543	198.483	411.03	353.276	128.909
	1893651	11630318	5720338	5640082	4010060	2400712	13042795	19282415	9059418	2364866		94.5848	580.915	285.722	281.713	200.296	60.596	329.211	486.704	228.667	59.6912
	3527612	13379360	7252430	4719229	4395783	2727645	15595427	19523977	17127730	6871234		176.198	668.277	362.247	235.718	219.562	68.8481	393.642	492.802	432.318	173.436
	2119592	19775730	7098884	8316252	3120700	3218759	9706109	12604378	18417986	5542447		105.87	987.765	354.578	415.383	155.874	81.2442	244.99	318.145	464.885	139.896
	3685999	3419948	10680291	5590245	4004702	4698176	5026620	16618922	18375366	3195040		184.11	170.821	533.463	279.224	200.028	118.586	126.876	419.476	463.81	80.6455
	1677890	15516197	6949185	7990662	6472660	3961234	8889498	15173052	5427717	6233655		83.8079	775.009	347.1	399.121	323.299	99.9849	224.378	382.981	137	157.343
	1246790	13365565	5684996	6812508	5198232	3323884	10415166	21193525	18563804	5656985		62.2751	667.588	283.956	340.274	259.643	83.8976	262.888	534.942	468.566	142.787
	1717690	15762335	4694318	5965732	5528565	3677039	7573549	23856545	20714725	2333533		85.7958	787.303	234.474	297.979	276.143	92.8116	191.163	602.159	522.857	58.9003
	1618283	9822449	4646525	9276722	4877405	1791006	7241089	12135350	9528232	3979162		80.8306	490.615	232.086	463.357	243.618	45.2065	182.771	306.306	240.501	100.437
	888026	9592847	6663396	6282332	10961155	2044309	6805924	16013468	12688072	3974542		44.3554	479.147	332.826	313.792	547.492	51.6001	171.787	404.193	320.258	100.321
	2370975	11122416	6942103	5889323	10563618	2551123	11171494	10978568	8935614	2599947		118.426	555.547	346.747	294.162	527.635	64.3925	281.978	277.108	225.542	65.6249
	3251579	11662974	16915127	5244827	5041122	2967461	5242840	15346626	10163837	4753624		162.411	582.547	844.883	261.971	251.796	74.9012	132.334	387.362	256.544	119.985
	2921479	11317808	7529944	7500409	5761851	2837053	13167941	12051499	12851134	2115363		145.923	565.306	376.108	374.633	287.795	71.6096	332.37	304.19	324.373	53.3935
	1365708	8068879	5232451	5509556	6395994	2179813	8610742	12202721	10045266	2809331		68.2149	403.027	261.352	275.193	319.469	55.0203	217.342	308.007	253.551	70.9099
	1997092	7803834	13815927	8277280	4040763	2119571	8284344	13499277	16980587	2553573		99.7515	389.789	690.083	413.437	201.83	53.4998	209.104	340.733	428.604	64.4543
	1328163	8797353	5849332	6790746	11253324	1579411	7971113	16597901	15104269	7382173		66.3396	439.413	292.165	339.187	562.085	39.8657	201.198	418.945	381.244	186.332
	1953889	10273097	5108483	6384357	3358418	3613592	12405630	16328273	11530109	4279087		97.5936	513.124	255.16	318.888	167.747	91.2101	313.129	412.139	291.03	108.008
	1083448	7228883	6177247	6001421	4139890	3040539	9440516	8437262	20516737	3956386		54.1165	361.071	308.543	299.761	206.781	76.7458	238.287	212.964	517.86	99.8625
	1973974	15290319	8164095	6998377	5562053	1356088	10090648	15871474	19241549	3449366		98.5968	763.726	407.783	349.558	277.815	34.2288	254.696	400.609	485.673	87.0649
	1610067	6589187	8164669	6126045	7880847	3267562	11170083	16366397	18397717	5842342		80.4202	329.119	407.812	305.986	393.635	82.476	281.942	413.102	464.374	147.466
	927636	9591148	10382961	7812933	8368838	5824890	12087899	15315393	20480448	3747360		46.3339	479.062	518.612	390.243	418.01	147.025	305.109	386.573	516.944	94.5865
	1424892	6595795	6057340	4170595	4902782	4618245	9707912	15316149	11994971	4191732		71.171	329.449	302.554	208.314	244.886	116.568	245.036	386.593	302.763	105.803
	1232358	5782630	7484053	5054420	3017451	5721404	9090188	13971450	9497640	3195526		61.5543	288.833	373.816	252.46	150.717	144.413	229.444	352.651	239.728	80.6578
	1336460	9014910	8773646	3944310	5542424	2879271	8546310	13615316	16263605	7428886		66.754	450.28	438.229	197.012	276.835	72.6752	215.716	343.662	410.507	187.511
	1146124	7614045	9856683	6442762	5580039	5296579	7221298	13937614	19093851	8306645		57.247	380.309	492.325	321.805	278.714	133.69	182.272	351.797	481.945	209.667
	1533514	8820240	9636730	6365914	5822658	2713105	7924164	13374633	20334481	7549919		76.5965	440.557	481.339	317.967	290.832	68.4811	200.013	337.587	513.259	190.566
	1531289	12223810	7869214	6511169	5449638	5905361	10804631	12432420	16370566	5396539		76.4854	610.559	393.054	325.222	272.201	149.056	272.718	313.805	413.207	136.213
	466603	8823682	8271506	6845291	9621061	4889959	8261289	15022528	18151110	6321907		23.3061	440.729	413.148	341.911	480.556	123.427	208.522	379.181	458.149	159.57
	2048555	7853040	9771524	6674255	6450058	7024462	8517972	10261948	14609244	12507977		102.322	392.247	488.072	333.368	322.17	177.303	215.001	259.02	368.75	315.712
	1174999	7296168	10624994	8953573	3184779	3411138	11296890	10062883	20629999	10293497		58.6893	364.432	530.701	447.216	159.075	86.1	285.143	253.996	520.719	259.817
	483319	17469755	9209626	6425843	3552389	7488534	5811550	11069734	13784948	2967584		24.141	872.586	460.006	320.96	177.436	189.017	146.688	279.409	347.944	74.9043
	731778	10131507	9585216	6828231	11542324	2621887	9833395	19812282	11069932	4080865		36.5511	506.052	478.766	341.059	576.52	66.1786	248.203	500.079	279.414	103.004
	891559	8029131	6593727	7131175	5081774	4595941	9456160	8427061	10515100	4889419		44.5319	401.042	329.346	356.191	253.826	116.005	238.681	212.706	265.41	123.413
	927941	5859699	8443294	6984294	3672387	2504134	16522763	14999380	8042101	4713278		46.3491	292.682	421.729	348.854	183.43	63.2065	417.048	378.597	202.989	118.967
	637045	9547601	8803080	10363796	6292325	2582600	8399527	9908149	10811468	5994021		31.8194	476.887	439.699	517.655	314.291	65.187	212.011	250.09	272.891	151.294
	341847	9576761	7720824	5233423	5860762	8729597	14458382	11302391	8259591	3305403		17.0747	478.344	385.643	261.401	292.735	220.342	364.942	285.282	208.479	83.4312
	1156342	7343336	5521602	15178248	4275213	3342033	14736839	17017610	25167195	3580284		57.7574	366.788	275.795	758.129	213.54	84.3557	371.97	429.539	635.241	90.3694
	551684	7678976	6712727	5831586	6262494	4502310	17277405	6738433	12437044	8469124		27.5557	383.552	335.29	291.278	312.801	113.642	436.096	170.084	313.921	213.768
	4628426	7126226	6368439	7711665	7722970	3702351	14714605	17004001	10222312	4021303		231.182	355.943	318.093	385.185	385.75	93.4505	371.409	429.195	258.02	101.501
	2065604	7606389	8908644	8051587	3782385	2209239	9511114	14806224	10266990	4471537		103.174	379.927	444.972	402.164	188.924	55.7631	240.069	373.722	259.147	112.865
	1839181	10913642	14033739	6090788	3892621	5519543	8948542	7102038	7245799	5068359		91.8641	545.119	700.962	304.225	194.43	139.318	225.869	179.261	182.89	127.93
	1970763	12768624	9201278	9239957	4091476	3086201	8739550	9863218	20721164	3294392		98.4364	637.772	459.589	461.521	204.363	77.8983	220.594	248.956	523.02	83.1532
	2128786	10763304	12800118	9323179	4509134	2672255	6523193	9527398	18296108	3823071		106.329	537.609	639.345	465.678	225.224	67.45	164.651	240.48	461.809	96.4975
	3125549	8954364	7319186	8077492	4680956	2513126	16584214	15706957	24440026	7950635		156.116	447.256	365.581	403.458	233.806	63.4334	418.6	396.457	616.887	200.681
	3666870	9271434	8328516	6202846	6364570	2301661	16053477	13664445	17558342	4087006		183.154	463.093	415.996	309.822	317.9	58.0959	405.203	344.902	443.187	103.159
	4062812	9162548	11487722	5773167	9951404	3873137	9480123	15546452	23119649	11544658		202.931	457.654	573.793	288.36	497.056	97.7612	239.286	392.406	583.559	291.397
	3154433	8514680	5928263	8413327	8048100	6844227	10440080	15224415	26981942	5874519		157.559	425.294	296.107	420.232	401.989	172.754	263.516	384.277	681.047	148.278
	2924128	8379439	8260831	5259174	4230177	8686768	7960648	19173616	20939756	4885035		146.055	418.539	412.615	262.687	211.29	219.261	200.933	483.958	528.537	123.302
	4222121	10329783	6197118	5320176	5029243	6528715	8708412	10998717	19509422	4942758		210.888	515.956	309.536	265.734	251.202	164.79	219.808	277.617	492.434	124.759
	2372429	7769158	7914519	6549589	3421596	5704223	11274975	8824843	24982639	3246715		118.499	388.057	395.317	327.141	170.903	143.979	284.59	222.746	630.583	81.9498
	1189068	4886938	12258102	5519249		4892359	7754992	7657753	17218250	4642010		59.392	244.095	612.272	275.677		123.487	195.743	193.288	434.603	117.168
	4642852	6599207	7721766	7117996		3445937	7245620	14678147	18517110	5190723		231.903	329.62	385.69	355.532		86.9784	182.886	370.489	467.387	131.018
	4596472	10925000	6039626	5479532		3521953	10402168	11433301	16590223	7415384		229.586	545.686	301.669	273.694		88.8971	262.559	288.586	418.751	187.171
	2365061	7932485	6266305	6497462		2752256	8315927	7188131	10097411	3883567		118.131	396.215	312.992	324.538		69.4693	209.901	181.434	254.867	98.0245
	2090685	9989991	6422182	11450243		5368443	7565141	18787885	8182373	4280464		104.426	498.984	320.778	571.921		135.504	190.951	474.222	206.53	108.043
	1831893	9835587	8447666	5615240		6770805	9853188	13523265	9714476	4024434		91.5001	491.272	421.947	280.472		170.901	248.703	341.339	245.202	101.58
	1697691	12304217	9685318	4958791		2442016	15919173	11708492	10401459	4105597		84.7969	614.576	483.766	247.684		61.6385	401.813	295.532	262.542	103.629
	1411092	8990359	12196687	5530728		5101938	9355153	9953843	8070610	4757647		70.4817	449.054	609.205	276.251		128.777	236.132	251.243	203.709	120.087
	1238470	8044324	8905524	5918607		5326751	21466210	12558673	11992404	9432285		61.8596	401.801	444.816	295.625		134.452	541.825	316.991	302.698	238.079
	2329781	7781677	11424118	6099523		5690730	14969653	22004083	15400320	9384391		116.369	388.682	570.616	304.661		143.639	377.847	555.402	388.717	236.87
	1215411	7695381	8531569	6480775		6611516	13961992	11760072	12817062	4310818		60.7078	384.372	426.138	323.704		166.88	352.412	296.834	323.513	108.809
	1791471	9938077	10460469	5592242		3467463	18724836	12591278	9172864	4853242		89.4811	496.391	522.483	279.323		87.5217	472.631	317.814	231.531	122.5
	2377865	7235766	6953015	4491880		3942614	18245334	9021673	17757071	8777476		118.77	361.415	347.292	224.362		99.5149	460.528	227.715	448.203	221.551
	3938324	6974805	10349987	5985437		2829696	11778816	11065793	18887907	3601418		196.713	348.38	516.965	298.963		71.4239	297.307	279.31	476.747	90.9028
	2311555	6249491	6862011	5492624		3679014	8938652	10348262	14367892	6687438		115.458	312.152	342.746	274.348		92.8614	225.619	261.199	362.658	168.797
	2069766	9712624	6348113	7177295		7622886	12486891	12792183	15863540	6474185		103.381	485.13	317.078	358.494		192.408	315.18	322.885	400.409	163.414
	2335567	7598908	5315728	7038532		2666605	15112675	13581380	9968560	5806549		116.658	379.553	265.512	351.563		67.3074	381.457	342.805	251.615	146.562
	2405236	8804626	7338834	5393449		2468116	7625939	18719040	19610876	9066275		120.138	439.777	366.563	269.394		62.2973	192.485	472.484	494.995	228.84
	2010266	16744435	9585117	5357920		4841030	15199535	6889409	13230504	4599886		100.41	836.357	478.761	267.619		122.192	383.649	173.894	333.949	116.105
	1716301	15908740	10029521	6359058		2264824	15514466	6624314	13046971	11109427		85.7264	794.616	500.958	317.625		57.1661	391.598	167.203	329.317	280.411
	1529617	16411827	5732110	5884092		4777486	17058891	9273680	18904553	6390514		76.4019	819.744	286.31	293.901		120.588	430.581	234.075	477.167	161.302
	1822991	10037541	9014007	4248022			15931878	7624571	21378321	9384268		91.0554	501.359	450.235	212.182			402.134	192.451	539.607	236.867
	2144213	9263148	8903798	4100453			16394647	9432172	15663328	4036042		107.1	462.679	444.73	204.811			413.815	238.076	395.356	101.873
	2019723	15631324	12094349	9251202			21942373	12878563	11378686	5020657		100.882	780.759	604.093	462.082			553.844	325.066	287.208	126.726
	2076558	8751709	8362582	4125552			15990570		7546343	3639987		103.721	437.134	417.697	206.065			403.615		190.476	91.8763
	2265386	16411573	7299326	4821607			15248548		5351078	5382819		113.152	819.731	364.589	240.831			384.886		135.066	135.867
	2784912	16502108	8059424	6879667			18704867		8839939	4757804		139.102	824.253	402.555	343.628			472.127		223.128	120.091
	2401706	17032570	7257980	4855105			11768899		6599403	4523307		119.961	850.749	362.524	242.505			297.057		166.574	114.172
	2148511	13292460	8636806	5350448			14784869		4794488	2492443		107.315	663.937	431.394	267.246			373.183		121.017	62.9114
	1643821	8050447	5330510	3793336			17975407					82.1062	402.107	266.25	189.471			453.714
	1689072	7902328	10916507	4242250			18484095					84.3664	394.708	545.262	211.893			466.554
	1774431	7067715	8255304	5355262			10568889					88.6299	353.021	412.339	267.487			266.768
	1418890	7028071	7002470	4310835			8919679					70.8712	351.041	349.762	215.319			225.14
	1718707	15666357	8384691	3927623			8176423					85.8466	782.509	418.802	196.178			206.38
	1883756	9407675	7793584	4168632			13428618					94.0905	469.898	389.277	208.216			338.95
	3147302	15153242	7058420	3756849			19012436					157.203	756.88	352.557	187.648			479.89
		9472340	8798075				8629130						473.128	439.449				217.807
			7900864											394.635
			13054486											652.05
			8116055											405.384
			5855856											292.49
			7125612											355.913
			6396454											319.492
			5217080											260.585
			5685970											284.005
			4872248											243.361
			6174840											308.423
			5797067											289.554
			6041798											301.778
15.03.2022	3597272	51567294	24976328	19823924	11127221	20701707	39151901	23156225	37429495	13157368		57.8403	829.148	401.593	318.748	178.914	163.276	308.794	182.635	295.209	103.773
	4538460	43847688	32172501	20523537	14554215	18837087	30677597	33606579	21732626	9817068		72.9736	705.024	517.3	329.997	234.016	148.569	241.956	265.057	171.407	77.4279
	8774334	43162414	41488358	21855413	17129432	19713254	52458703	26121726	34634417	9691284		141.082	694.006	667.089	351.412	275.423	155.48	413.745	206.024	273.164	76.4358
	3160353	32600709	25299933	15093057	14996986	18307080	31120946	41120069	48060479	4373268		50.8151	524.185	406.796	242.68	241.136	144.389	245.453	324.317	379.056	34.4923
	3941842	36966035	24495600	14319037	14749178	9870388	22754874	45761036	41756167	9731710		63.3807	594.375	393.863	230.235	237.151	77.8484	179.469	360.92	329.334	76.7547
	4101201	43840599	22053890	28664131	15467352	17961940	58210471	31346380	63170677	10879931		65.943	704.91	354.603	460.889	248.699	141.667	459.11	247.231	498.231	85.8108
	3923092	15765487	20160172	34421088	11559585	18213150	32555429	37913170	48144895	22011085		63.0792	253.492	324.154	553.455	185.866	143.648	256.767	299.024	379.722	173.603
	8385887	38960398	12159821	15892891	13768936	15757132	34706971	44202614	23458203	11038588		134.836	626.442	195.517	255.541	221.39	124.278	273.736	348.629	185.016	87.0621
	5254159	44435284	18123879	16401119	21083838	21320416	36077818	52396833	60713727	9531343		84.4813	714.472	291.413	263.713	339.006	168.156	284.548	413.257	478.853	75.1743
	4163827	19070915	16635991	28910905	12469156	11435232	30082563	54715644	15158506	17394701		66.9499	306.64	267.489	464.857	200.491	90.1905	237.263	431.546	119.556	137.193
	3744554	46589968	28794292	20267470	14187336	14424660	59685986	51622385	25291884	6592170		60.2085	749.117	462.982	325.879	228.117	113.768	470.747	407.149	199.479	51.9929
	3839827	53690380	16449200	14822786	18264210	22267947	45973914	44884162	27166486	8069019		61.7404	863.285	264.486	238.335	293.669	175.629	362.599	354.004	214.264	63.6409
	3509460	50259970	31315071	26508585	26885968	17005395	32493824	36539844	33616928	10221455		56.4284	808.127	503.513	426.23	432.298	134.123	256.281	288.192	265.139	80.6173
	3392249	37317662	28362189	30577733	9213717	17395512	56194355	39661684	23920899	10493968		54.5438	600.029	456.034	491.658	148.147	137.2	443.209	312.814	188.666	82.7666
	4026697	38125752	26541210	20547914	8724778	14002508	30835122	18156850	37475867	9835902		64.745	613.022	426.755	330.389	140.285	110.439	243.199	143.204	295.575	77.5764
	8069876	60403044	24900026	19904852	17652597	10465440	72351757	37015362	16543684	21954009		129.755	971.217	400.366	320.049	283.835	82.5416	570.643	291.943	130.481	173.153
	5029718	39686510	38558442	20726679	14030326	13705003	39839420	41195017	25759150	12861367		80.8725	638.117	619.979	333.263	225.593	108.092	314.216	324.908	203.164	101.438
	7638026	35564984	23976650	21423909	9673319	25312776	58186737	39193863	26387069	11847781		122.811	571.847	385.519	344.474	155.537	199.644	458.923	309.125	208.117	93.4443
	7299587	39100676	25089368	16566205	13270520	13947984	38483447	27409365	32336941	11070950		117.37	628.698	403.411	266.367	213.376	110.009	303.522	216.18	255.044	87.3173
	5522249	51029495	20538320	18690869	17784919	15379440	37062851	41940699	24395702	22421339		88.7919	820.5	330.234	300.529	285.963	121.299	292.317	330.789	192.411	176.839
	4977107	38935627	20956199	17354246	29721915	12803162	54723051	58293112	37517661	7912523		80.0266	626.044	336.954	279.038	477.897	100.979	431.604	459.762	295.904	62.4066
	12803232	32844669	13920124	32851317	23842129	10277314	43590628	45695166	41656604	17571774		205.862	528.108	223.821	528.214	383.356	81.0579	343.802	360.401	328.548	138.59
	7416013	31764426	12601339	26767292	20585373	7350171	28482273	30195592	22403307	11356586		119.242	510.738	202.616	430.39	330.991	57.9713	224.642	238.155	176.696	89.5702
	3121817	38158673	26883533	21572147	30431897	9393576	58253089	46351694	47899445	10108862		50.1955	613.551	432.259	346.857	489.313	74.0878	459.446	365.579	377.786	79.7293
	2861383	51157059	30595870	18547954	21120418	15198585	59079204	32887527	36138112	14749281		46.008	822.551	491.949	298.231	339.594	119.872	465.962	259.386	285.024	116.329
	2987964	34809761	26237298	15689691	20177679	8744442	28085515	47505734	27362983	12276964		48.0433	559.704	421.868	252.274	324.436	68.968	221.512	374.681	215.814	96.8292
	8153583	38364752	27435626	20906509	17497732	12140911	25503864	24801512	27636622	15641041		131.101	616.865	441.136	336.155	281.345	95.7562	201.151	195.611	217.972	123.362
	2680730	43778615	24399571	17371271	28687385	15298487	53458442	27986742	19234610	13836577		43.1033	703.914	392.319	279.312	461.263	120.66	421.63	220.733	151.705	109.13
	4632214	37659666	24811471	23615966	33543894	11445586	52430541		17021823	27199403		74.4811	605.528	398.942	379.72	539.35	90.2721	413.523		134.252	214.524
	3838262	40363026	29170156	21304609	26974015	18380111	53711304		47737096	27892395		61.7152	648.995	469.025	342.556	433.714	144.965	423.625		376.506	219.989
	5832662	25060712	27896820	19186013	13002756	14875392	78265611		23847532	16101139		93.783	402.95	448.551	308.491	209.071	117.323	617.286		188.087	126.991
	4838120	29279880	27980722	13499108	14827462	4803035	30371392		42744289	9187427		77.7919	470.79	449.9	217.051	238.41	37.8819	239.541		337.127	72.4619
	5872602	29998933	27342354	14317039	10551537	14599623	49307474		34826613	15534761		94.4252	482.351	439.636	230.203	169.658	115.148	388.891		274.68	122.524
	3724243	29904988	24536913	21752910	26884539	17453361	51434052		17057505	11245669		59.8819	480.841	394.528	349.764	432.275	137.656	405.664		134.534	88.6954
	4482138	30740064	33483217	22718357	13496740	11483917	22757625		11643614	21249055		72.068	494.268	538.375	365.287	217.013	90.5744	179.491		91.834	167.593
	3596546	27153424	26967913	21224581	13808581	8207529	19352229		20658318	9853404		57.8287	436.598	433.616	341.269	222.027	64.7333	152.632		162.934	77.7145
	5613781	22362121	33936633	21668437	11057171	7469602	24829397		16737337	13932469		90.2637	359.559	545.665	348.406	177.788	58.9133	195.831		132.009	109.886
	4954015	22266347	17756650	21477608	12868720	15958035	57617256		23470591	11642421		79.6553	358.019	285.508	345.337	206.915	125.862	454.431		185.114	91.8246
	3986119	33725943	18093910	19438777	14258130	15535337	73152593		25469699	15984879		64.0926	542.278	290.931	312.555	229.256	122.528	576.959		200.881	126.074
	5457079	30255202	27848028	24804971	11994081	12753345	40425667		25190077	17555481		87.7441	486.472	447.767	398.838	192.852	100.586	318.84		198.676	138.461
	4530197	26913664	29932126	22489532	19375977	8809995	67584793		46746948	23155294		72.8408	432.743	481.277	361.608	311.545	69.485	533.046		368.696	182.627
	4040674	28511976	27244337	21704787	14543094	14069105	32459344		31996393	20094069		64.9698	458.442	438.06	348.99	233.838	110.964	256.009		252.358	158.483
	3181148	24360834	25472071	21005464	19562715	7877351	30816188		31514508	12319289		51.1495	391.696	409.564	337.746	314.548	62.1292	243.049		248.557	97.1631
	3571247	26447277	27057796	16923159	10678760	11802900	35315391		31181456	25112798		57.4219	425.244	435.061	272.107	171.703	93.0903	278.535		245.93	198.066
	2037535	28824734	27527457	21965484	9376270	8230824	32086507		26117564	24219416		32.7614	463.471	442.612	353.182	150.761	64.9171	253.068		205.991	191.02
	3347029	29608125	20545426	23403814	16711768	8255636	70421934		20594490	19912802		53.8167	476.067	330.349	376.309	268.708	65.1128	555.423		162.43	157.054
	10413852	36637273	22295610	24372177	16111249	7119120	32971653		22222237	15174075		167.444	589.089	358.49	391.879	259.052	56.149	260.05		175.268	119.679
	10323249	30425053	24661716	27484138	9812692	6035076	64313682		21646834	19230758		165.987	489.203	396.534	441.916	157.778	47.5991	507.246		170.73	151.674
	5966140	27704844	22549694	21152106	16906490	8191447	39901548		27790621	12939619		95.9292	445.465	362.575	340.104	271.838	64.6065	314.706		219.187	102.056
	5299422	24193300	24809961	28296017	8962802	8957610	51338856		29523625	23543345		85.2091	389.003	398.918	454.97	144.112	70.6493	404.913		232.855	185.688
	6115205	34190554	24437596	23083145	8826345	8956913	24900629			16057366		98.326	549.748	392.931	371.153	141.918	70.6438	196.393			126.646
	6274535	28259067	20476156	27762123	25422305	5180979	39751789			13002028		100.888	454.376	329.235	446.386	408.764	40.8627	313.525			102.548
	6094391	35870889	30026928	22543940	15726040	5528870	26612523			6370597		97.9914	576.766	482.801	362.483	252.858	43.6066	209.895			50.2453
	5334240	34973243	25800908	17718302	18571745	6556890	53237160			4143398		85.7689	562.333	414.851	284.892	298.614	51.7146	419.885			32.6793
	5859762		16012106	26798607	24842440	15156384	31631398			13592260		94.2188		257.458	430.893	399.44	119.539	249.479			107.203
	6108929			21672313	16696351	4316995	35593021			21298159		98.2251			348.468	268.46	34.0484	280.725			167.98
	5396821			35808988	23125445	7460366	54473395			21572311		86.7752			575.771	371.833	58.8404	429.635			170.142
	7601978			19506298	15379805		25793984			19976998		122.232			313.641	247.291		203.439			157.56
	6542681			29350751	9909782		47349863			12026179		105.199			471.929	159.339		373.452			94.8513
	10628940			17984128	7492233		25199653			12103985		170.902			289.166	120.467		198.751			95.465
	9825259			22629842			56479313			11342306		157.98			363.864			445.456			89.4575
	6666689			19663856			30261658			16374923		107.193			316.174			238.676			129.15
	5375374			23669297			32992761			19605625		86.4303			380.577			260.216			154.631
	8347580			26403489			53251910			13425055		134.22			424.54			420.001			105.884
	8640502			21917628			39780470			17571501		138.93			352.412			313.751			138.588
	6388881						63522527			8014634		102.726						501.006			63.212
	6583775						43738212			11804988		105.86						344.966			93.1067
	4869869									18993524		78.3023									149.803
	7335928									14683688		117.954									115.811
	4370075									19610031		70.2662									154.666
	11768354									10646599		189.223									83.9704
	6595911									17884456		106.055									141.056
	6898659									12744252		110.923									100.515
	4705386									14182821		75.6576									111.861
	7325983									12771006		117.794									100.726
	4632324									8987390		74.4829									70.8842
	4046887									7491060		65.0697									59.0825
	6194252									13930039		99.597									109.867
	10220610									9984960		164.337									78.7521
	4895113									5586144		78.7082									44.0583
	6535003									6162064		105.076									48.6006
	13072219											210.187
	6196980											99.6409
	7514272											120.822
	10955572											176.154
	13138111											211.247
	13851557											222.718
	5371758											86.3722
	11082214											178.19
	7140461											114.811
	7318149											117.668
	6680534											107.416
	6316705											101.566
	4320493											69.469
	6722846											108.096
	12547999											201.759
	7088802											113.98
	5541460											89.1008
22.02.2022	12264587	22721953	7864353	28063243	10207544	13310791	40149106	57278874	14110028	19174322		108.902			249.185	90.637	106.163	320.217	456.838	112.537	152.928
	13266757	17708689	8543013	12123065	11473552	9607420	31352001	61069776	27204828	7749742		117.801				101.878	76.6258	250.054	487.073	216.977	61.8095
	18984922	7734506	6100384	14822777	14055048	17743855	34067389	39236600	17665699	13241313		168.575				124.801	141.519	271.711	312.939	140.896	105.609
	15007415	18567094	6864230	13576676	12523900	15924163	32904702	49738514	23700475	24974066		133.257				111.205	127.006	262.438	396.699	189.028	199.185
	12749160	15503626	6221237	16582928	15164828	13578995	39447220	41996838	28559698	25168723		113.205				134.655	108.302	314.619	334.954	227.783	200.738
	11817002	11959006	5542811	18146882	17498443	11929440	32530261	50197468	28098678	14410710		104.928				155.376	95.1455	259.451	400.359	224.106	114.935
	14386350	18243331	4153325	17458636	9388654	16040771	67243558	36612417	20002383	11325670		127.742				83.3658	127.936	536.314	292.009	159.533	90.33
	13546012	19181391	8392248	18456748	8208834	17696995	39343015	41347096		12222266		120.281				72.8897	141.146	313.788	329.771		97.481
		12542758	8109495	18714600	9878351	8709251	43713309	54229806		11062101						87.714	69.4623	348.644	432.52		88.2278
	11565181	31137101	9948433	18888069	10484617	21277971	30699785	29904584		15387091		102.692				93.0973	169.706	244.852	238.51		122.723
	13376349	21014411	13761251	30508341	10995196	17802124	57368238	29276648		12614784		118.774			270.896	97.6309	141.984	457.551	233.501		100.612
	12966208	26274976	18143946	20264937	11394426	8955263	32401486	56477502		17372678		115.132				101.176	71.4244	258.424	450.447		138.559
	17687726	15228608	16113563	19575478	14437435	16800556	11807454	30785195		19493124		157.057				128.196	133.996	94.1726	245.533		155.471
	10789958	12001967	26124937	17897743	12871215	15471506	25362734	27586913		17498984		95.8085		231.974		114.289	123.396	202.285	220.025		139.566
	9227397	14202200	25188662	22183440	11305046	15510520	42659136	34090781		20557125		81.9339		223.661		100.382	123.707	340.236	271.897		163.957
	13122919		12869039	18557675	14223511	22729463	52883865	23094430		21071116		116.524				126.296	181.283	421.785	184.194		168.057
	6771727		26214102	18643386	8793769	22685365	41808303	25769163		20267762		60.129		232.766		78.0836	180.931	333.45	205.527		161.649
	8286702		17804455	17964265	10547992	13292242	60409078	26485405		15767189		73.5811				93.66	106.015	481.804	211.239		125.754
	18418521		35400727	16828338	20386272	17387987	30457225	35188916		13168855		163.546		314.338		181.018	138.681	242.917	280.656		105.031
	11113461		32852574	17764202	11488585	12039244	35154661	53895331		12359870		98.6811		291.712		102.012	96.0212	280.383	429.852		98.5784
	8983385		19628107	19603488	10504921	8945365	44793361	40519136		13735925		79.7672				93.2776	71.3454	357.258	323.168		109.553
	14194786		45781913	22084901	12914952	6737745	41560582	49974383		22774127		126.041		406.517		114.677	53.7381	331.474	398.58		181.639
	12602066		3139227	19594788	13039088	15475197	54078995	47393441		23236234		111.899				115.78	123.425	431.317	377.995		185.325
	7784658		5832009	28113757	25086593	15478616	33026570	48190169		17067509		69.1232			249.634	222.754	123.453	263.41	384.35		136.125
	15844622		10579866	18351597	12860325	8417114	48862674	35836288		15642286		140.691				114.192	67.1323	389.713	285.819		124.758
	8066255		6578112	19278821	11720472	7153374	33036110	47308109		20252587		71.6236				104.071	57.0531	263.486	377.315		161.528
	8876165		7882484	18142261	11317156	12983919	66142923	56424534		39122100		78.8152				100.49	103.556	527.535	450.024		312.026
	9203423		8556294	17046279	12823793	15636192	37364909	26902651		23882834		81.721				113.868	124.709	298.011	214.567		190.482
	15455293		33511934	17110478	8420334	13036899	34740428	47352376		17347032		137.234		297.566		74.7677	103.978	277.079	377.668		138.354
	11343180		8766925	32222586	7497672	11884840	36569660	70093565		15177881		100.721			286.118	66.575	94.7898	291.668	559.044		121.054
	12944391		7099535	17798483	12582251	8533170	27087997	24097873		16603837		114.939				111.723	68.0579	216.045	192.197		132.427
	7532051		47086937	21655564	31716775	7609186	47261779	50898392		20893469		66.8802		418.105		281.627	60.6885	376.945	405.95		166.64
	9570240		13701543	14585851	13810673	7173283	34216253	45295590		25385399		84.9782				122.631	57.2119	272.898	361.263		202.466
	8724508		14061362	18233475	18807606	10665222	43285277	41601927		11898621		77.4686				167.001	85.0625	345.23	331.804		94.8997
	7504361		10040652	20691282	28423782	8244155	36346269	18619701		26466674		66.6344				252.387	65.7528	289.886	148.505		211.09
	7280032		8257537	24560459	15706952	9597894	28966133	21473280		30612592		64.6424			218.083	139.469	76.5498	231.025	171.264		244.156
	5369828		9797961	23623571	12469156	8192552	38827025	30051697		21018474		47.6809			209.764	110.719	65.3412	309.672	239.683		167.637
	6817875		19534968	23719767	16504576	14731273	49746671			14012903		60.5388			210.618	146.551	117.492	396.764			111.763
	6532243		10615121	22756459	16250191	9265923	38997339			17446431		58.0025			202.064	144.292	73.9021	311.031			139.147
	5826531		15509644	20128169	11681306	7051273	32087247			10393299		51.7362				103.723	56.2387	255.918			82.8937
	11486258		7557884	23499473	31907323	10648682	34805064			9691844		101.991			208.662	283.318	84.9305	277.594			77.2991
	11858397		8533576	21882883	18197935	5662476	42466110			13250631		105.296				161.587	45.1621	338.696			105.683
	9436712		14471662	20089057	23736688	6990731	52026528			7961320		83.7925				210.768	55.7559	414.947			63.497
	9625158		33036126	18845590	35031158	15036250	33680634			21948884		85.4658		293.342		311.056	119.924	268.626			175.057
	12239003		12824910	17199970	15279455	10569507	29291127			24277200		108.675				135.673	84.2991	233.617			193.627
	8203438		10242293	12412725	12574960		35206402			14457292		72.8418				111.658		280.795			115.307
	7663344			20880368	14820249		30512684			11395509		68.046				131.595		243.36			90.887
	12860946			14145246	18734450		21459926			10431617		114.198				166.351		171.158			83.1993
	6343463			23426746	11647900		31447023			18853226		56.3263			208.016	103.427		250.812			150.367
	6106556			35591997	12329933		24262207			9956254		54.2227			316.036	109.483		193.508			79.408
	5855242			24434975	13274534		27115858			18899653		51.9911			216.968	117.87		216.268			150.738
	14150146			20010925	13964013		59639201			21698538		125.645				123.992		475.664			173.061
	9014354			16565557	17803291		57864947			13797262		80.0422				158.083		461.513			110.043
	10412495			18938269	26223121		49729132			27198458		92.4569				232.846		396.624			216.926
	12647664			23309680	20657137		26810080			11783873		112.304				183.423		213.829			93.9845
	11766732			21081702	9020465		19463013			15469592		104.482				80.0965		155.231			123.381
	17577042			21742962	15757316		29452841			11274014		156.074						234.907			89.918
	18233685			25900613			29446063			7702939		161.905			229.982			234.853			61.4362
	10667875			22440515			43274613			23752049		94.7245						345.145			189.439
	12631656			17562504			26338086			34797054		112.162						210.064			277.53
	16252715			35261735			37036389			25291776		144.315			313.104			295.391			201.719
	13777835			20254832			18307015			19056349		122.339						146.011			151.987
	16021409			21194899			18487962			20252136		142.261						147.454			161.525
	9014998			23938437			49395125			16350304		80.0479			212.559			393.96			130.405
	12172602			16947027						16756472		108.086									133.644
	8415204			17016397						14810311		74.7221									118.122
	10628811			31123773						14389921		94.3777			276.361						114.769
	22915091			17078845						12016956		203.473									95.8435
	9915569			18407294						17184642											137.059
	13969401			16044823
	8080254			20257346
	9572118			22615554											200.813
	5543536			21756072
				18889321
				13247848
				10890789
				19712736
				23555743											209.161
				18485474
				22013352
				16567007
				20235432
				17713557
				16810567
				19274711
				13616666
				14335018
				13695241
				14518952
												100.231	576.439	507.611	395.369	210.284	100	320.948	323.878	307.571	121.391
												38.9222	170.915	213.485	152.002	101.614	43.3282	102.586	106.628	127.756	51.3897
												2.06578	10.9417	12.9683	9.28502	6.27776	2.66666	5.89341	7.25511	8.7332	2.93775
													3.01606e-218	2.2935e-150	1.4955e-149	8.14451e-62		1.06231e-131	5.02656e-117	2.39117e-87	1.45846e-07
													***	***	***	***		***	***	***	***

## Sheet: IF Pol2 average
	siMock					siXAB2						siMock					siXAB2
	No UV	1h	2h	4h	16h	No UV	1h	2h	4h	16h		No UV	1h	2h	4h	16h	No UV	1h	2h	4h	16h
29.04.2022	3717053	9538147	6641799	15908793	6896982	18575262	7868250	13737435	6454405	6372175							118.01	49.9876	87.275	41.0053	40.4829
	5356994	10324482	8176326	10446482	6850366	21826048	12206822	16924592	10248474	8786062							138.663	77.5509	107.523	65.1093	55.8185
	4337789	4939329	9209254	9273672	6047183	23687522	15582672	23488437	6994195	9981893							150.489	98.9979	149.224	44.4347	63.4157
	6132604	10442691	5929506	8013034	5841507	14810578	12086617	12611827	8628871	12054918							94.0927	76.7872	80.1239	54.8199	76.5858
	4584118	6751420	7987899	8119217	6681661	16851830	10391683	12992578	8959197	9540422							107.061	66.0192	82.5429	56.9185	60.611
	6520092	9431969	7398010	15249274	10873569	19086847	7898641	10619439	9694630	5538503							121.26	50.1807	67.4661	61.5907	35.1865
	4193171	8078630	14514540	12094099	5776441	17623834	13310125	11428026	10546418	3761711							111.966	84.5603	72.6031	67.0022	23.8984
	4068257	4956018	5776455	9605498	7366420	16458712	10909319	7106673	8510706	8787312							104.563	69.3077	45.1492	54.0692	55.8265
	4814220	6041202	5931902	8467578	5277332	14640530	11185674	10878177	12401638	6138779							93.0124	71.0635	69.1099	78.7886	39.0001
	4295495	4217629	5871088	6680756	5275508	19086201	10664968	19271877	7768492	10110972							121.256	67.7554	122.436	49.3538	64.2358
	5060791	5802729	9931538	6201295	3330546	23400046	21642886	12076787	5287250	6472741							148.662	137.499	76.7248	33.5903	41.1218
	8185825	4792332	5816376	6140793	4016450	27857739	10663240	9646254	6251916	14304906							176.982	67.7444	61.2834	39.7189	90.8802
	5772566	5015799	6085745	8577808	8978851	21590527	8385028	14856691	6047019	11459025							137.166	53.2707	94.3857	38.4172	72.8001
	5763806	7611778	6301128	6741771	9571564	16177560	10581122	13507523	4783650	5922175							102.777	67.2227	85.8143	30.3909	37.624
	5136074	9778972	5356363	10154824	9014852	10239467	8304054	17490370	5713069	9540929							65.0521	52.7563	111.118	36.2956	60.6143
	5376942	7123399	5252813	13990842	4559776	15853429	8726502	20422665	6136989	14106333							100.718	55.4401	129.747	38.9888	89.6186
	5026248	7571247	5871121	6616204	7952637	16633809	9013020	13098742	6490441	5274228							105.676	57.2604	83.2173	41.2343	33.5076
	7196674	6496576	5440780	9369144	9203459	12230809	17100366	9575585	5755748	5638454							77.7033	108.64	60.8344	36.5667	35.8215
	2925932	3890150	13561429	7176826	5405541	10301500	12377546	9522843	7755353	6767813							65.4462	78.6355	60.4994	49.2704	42.9964
	3659441	8080443	8628205	7330783	13717076		8847608	11919125	12244043	6618220								56.2095	75.7231	77.7874	42.0461
	5085866	5615979	5752657	6066829	5074885	13913267	12926308	13410617	5731376	11561734							88.3921	82.1218	85.1987	36.4119	73.4526
	7452228	3387413	5983287	13234195	5203369		20330064	12411676	7813435	6204624								129.158	78.8523	49.6394	39.4185
	3791121	6717350	8012703	4729441	2871245		20188660	14034891	4673436	18087318								128.26	89.1647	29.6907	114.91
	5210866	4876043	7661223	9903320	4442358	12491816	14447428	7673806	3747013	13520665							79.3615	91.7856	48.7523	23.8051	85.8978
	7183739	6006056	5146135	4695973	11479044	8337799	15093826	11284739	7120741	11806628							52.9707	95.8922	71.6928	45.2386	75.0084
	4714276	3488465	7253220	6841288	11620563	7195886	8549659	10970812	4753051	10357629							45.716	54.3166	69.6984	30.1965	65.8028
	5363474	5865505	5829741	3097881	3612991		10906484	8097720	10437925	6573190								69.2897	51.4454	66.3129	41.76
	4413252	2159498	7943975	8820175	2845448		15113570	7974612	7174931	12602449								96.0177	50.6633	45.5829	80.0643
	4829192	7758258	7911305	7169440	6312983		10126527	10017985	5821284	16652266								64.3346	63.645	36.9831	105.793
	4071450	8127922	6288708	8575039	5228166	11421458	12625729	10302130	8272395	10001331							72.5614	80.2122	65.4502	52.5552	63.5392
	5717620	4174703	9557380	9175310	7653655	8307677	9875854	8834795	5966915	11530301							52.7793	62.7421	56.1281	37.9083	73.2529
	5923017	5610652	4033073	11580691	5746830	7420716	18830870	21692597	6145431	17814697								119.634	137.815	39.0424	113.178
	2861015	6250960	4507581	11653362	9654167		7734982	17462587	6403346	12932648								49.1409	110.941	40.681	82.1621
	4717000	6265441	4529701	14246287	7488340		11940600	19111197	7524320	16124639								75.8596	121.415	47.8026	102.441
	6477173	6611937	4530242	11327709	13718092		20346564	15697557	5266152	16088523								129.263	99.7278	33.4563	102.212
	5187547	5681203	5706847	13000983	10307014		13260560	21928735	5693249	11018080								84.2454	139.315	36.1697	69.9987
	8727192	6511345	6974655	6443458	9111960		15082610	19852975	4361046	12343745								95.821	126.127	27.7061	78.4208
	5284297	5299991	6800780	8115875	5654965	13820380	19242770	8713164	5741989	17071252							87.8019	122.251	55.3554	36.4793	108.455
	9312877	9491387	4957717	8073356	6612847	8188063	11626786	22904981	11739441	7581461							52.0194	73.8659	145.517	74.5816	48.1656
	5410254	7128661	6255342	12061567	11304294	7740591	18150550	12343208	4937056	6214010							49.1766	115.312	78.4174	31.3655	39.4781
	6664111	5717666	4549200	13860276	8455064		17801979	15942331	3554617	13954062								113.097	101.283	22.5828	88.6512
	5364675	4549406	7570050	9630481	6708821		15354435	16668788	5423873	7336682								97.5479	105.898	34.4583	46.6105
	4701719	5050516	6275665	12741239	9315166		14396067	9995162	6402149	6916912								91.4593	63.5	40.6733	43.9437
	4241247	7604844	5601358	7219602	9862869	12489893	7187275	11324334	5890072	5215465							79.3493	45.6613	71.9444	37.4201	33.1343
	5186085	5711589	13927899	6009711	7572632	17095865	15680239	9624148	4417928	8389016							108.611	99.6178	61.143	28.0674	53.2961
	4375024	5505438	5320394	6879214	11106194	11430714	15449479	13945724	4225839	6642854							72.6202	98.1517	88.5983	26.8471	42.2026
	6527982	6041680	5003261	7376761	5616497	9018144	12488192	9875029	3974846	7958592							57.293	79.3385	62.7368	25.2525	50.5616
	5135258	6971530	5450176	6162735	4501552	20819756	16241964	9038143	4052038	16509043							132.27	103.186	57.42	25.7429	104.883
	6388993	7499020	5494291	7043306	7022316	11040913	14229706	6365867	8818530	7170071							70.1438	90.4024	40.4428	56.0248	45.552
	6399193	9223910	4703981	6290571	5917954	18906703	11630501	16354719	7733608	5774869							120.116	73.8895	103.903	49.1322	36.6882
	5561766	5972746	9119071	10624834	5730166	10052709	11454470	7928356	9205808	9002099							63.8656	72.7711	50.3695	58.4852	57.191
	5786167	5651147	10089289	9685092	6139438	10342184	13149359	23567615	13051547	4257502							65.7047	83.5389	149.727	82.9175	27.0482
	4586564	6805917	5983492	7320991	6851977	16713810	14877942	10077421	9002021	7578881							106.184	94.5207	64.0226	57.1905	48.1492
	5358543	4119846	7597806	7008848	7258478	23773161	14907393	7746261	9135285	6002054							151.033	94.7078	49.2126	58.0372	38.1315
	5224632	7476203	6948458	12570617	12994170	14341223	12157558	9496562	10346092	4767354							91.1109	77.2379	60.3324	65.7295	30.2874
	4152476	8751077	6418861	8914418	5744234	10013259	7140800	9185807	8037385	13025460							63.615	45.3661	58.3581	51.0621	82.7518
	3115812	6709367	5631368	5590070	7607751	18245786	15558678	8160750	17314909	9648319							115.917	98.8455	51.8459	110.003	61.2965
	5132631	6586621	5132269	8851181	3538244	11494977	16462664	5213678	11618983	9375437							73.0285	104.589	33.1229	73.8163	59.5629
	3598444	9572350	8393991	9926115	8003106	14470901	13737957	6884037	11880425	6744931							91.9348	87.2783	43.7348	75.4773	42.8511
	3024268	4439079	4866561	8822504	9141693	9073592	10036982	6517238	5172305	7105432							57.6452	63.7657	41.4045	32.8601	45.1414
	4504052	4248013	5831451	5451209	7286102	8612775	10521796	15694228	7051223	7990378							54.7176	66.8458	99.7066	44.797	50.7635
	4786488	4275194	11312625	3778875	7495313	9341810	13679982	22229153	9939089	17124685							59.3492	86.91	141.224	63.1438	108.794
	4489943	6932824	5857388	4656598	4256109	23123614	11375918	10001288	6997040	5197653							146.906	72.2721	63.539	44.4527	33.0211
	3781266	5623644	5495833	6738860	11678532		13662109	18589185	14866491	11388325								86.7964	118.099	94.448	72.3509
	6191266	4252355	5726994	6495618	6150019	12824431	16083874	7341359	9675013	5280972							81.4746	102.182	46.6402	61.4661	33.5504
	3606090	3192940	8815180	8799278	6277812	13741436	10567173	10544067	8783618	6387600							87.3004	67.1341	66.9873	55.803	40.5809
	3344820	4506660	4508556	6835354	7810262	26677659	8151880	6699325		5365134							169.485	51.7895	42.5613
	3393067	3243451	4244049	7257661	8987845	20089856	11523911			5938743							127.632	73.2123
	3147551	4527763	3889851	9623049	6615482	21275673	18602700										135.166	118.184
	7156780	5140368	6886555	8437979	3966782	16872037	9674479										107.189	61.4627
	5085538	4466033	3780527	6534798	5056121	15216881	11603394										96.674	73.7173
	4395872	4008050	7948935	9718689	3623889	20075320	11196187										127.54	71.1302
	4270003	4406624	3526777	6319380	5379206	16415804	20765907										104.291	131.927
	8133107	4885434	3997006	16917363	11627852	16585802	14450118										105.371	91.8027
	7201171	5529914	5271718	8373272	3048662	14954223	8829612										95.0053	56.0952
	4169757	4698178	10311973	9356629	12806094	22968758											145.922
	3971705	5970153	6834706	8055737	5955422	23950724											152.161
	3519760	5356812	12103166	8849426	4941571	19057739											121.075
	4016820	5343376	7023521	7608310	3520063	23709365											150.627
	3670937	4257846	7785788	4344500	3394864	24365919											154.799
	5500013	7736119	7080973	4778795	9854025	13913287											88.3922
	4671383	7047113	5630712	4835976	6871720
	5844666	6502278	6445565	6099652	10202265
	5924219	6832272	6164463	9158856	5970503
	4010626	5378345	8177706	13398250	5141885
	3857292	3478363	7084406	6731514	6604310
	3113717	5298946	7843474	9148753
	3256858	11074897	8367869	10711704
	3975380	7040570	6932678	8081497
	4291005	4031346	7787305	7228273
	4612842	2836839	12685195
	3844531	3049388	8020146
	5569113	4229199	6016659
	2988829	5005169	4760844
		4206412	4023727
			4635919
			6310435
			5346567
31.03.2022	15014018	30658536	25338744	10238385	26982359	19399007	43658564	31785520	39753466	20954683		81.0994	165.604	136.869	55.3034	145.747
	18252671	34009220	13583163	15223812	31992830	20163176	50742215	57113910	28670972	29587001		98.5932	183.703	73.3705	82.2326	172.812
	26184767	14518278	18424938	17685826	33920748	24359641	37623921	62455094	46069328	32678237		141.439	78.4216	99.5237	95.5313	183.226
	20277760	24938094	15283679	17182803	23392308	13337753	34016699	45749280	35580946	30051278		109.532	134.705	82.556	92.8142	126.355
	28160787	14601585	23086084	16248918	29513499	20558771	19644126	70898846	20173937	29392176		152.113	78.8716	124.701	87.7698	159.419
	14748953	16376331	18497305	25634083	36312301	24976398	27468445	27756651	19908930	22786372		79.6676	88.458	99.9146	138.464	196.144
	33028743	14086875	19378000	23339746	30790636	26202124	26367561	34560424	34991340	18894584		178.407	76.0913	104.672	126.071	166.318
	28770560	16894279	13051463	15666718	27919712	13262899	44645283	28754176	45621966	25676786		155.406	91.2557	70.4985	84.625	150.81
	23583291	29989544	10635933	21228959	34546822	27659283	26090809	57066301	23526129	40845066		127.387	161.991	57.4508	114.67	186.607
	20860391	22895233	14634505	18270677	27921065	16357235	35372632	47424442	29080730	21824247		112.679	123.67	79.0494	98.6905	150.818
	20455788	30384526	10925060	16863015	27053726	26764983	27721625	35961335	32120204	17932777		110.494	164.124	59.0125	91.0869	146.133
	22916115	20126280	10431661	14436292	30013180	15502622	39669091	36455035	20312532	33107221		123.783	108.714	56.3474	77.9787	162.118
	37551643	27226178	13078707	20906164	32553410	15850592	55902517	48538966	33495722	25640941		202.838	147.064	70.6456	112.926	175.84
	21965144	33649561	12626775	30688577	20502021	20309540	29902824	28526912	35085935	14867145		118.646	181.761	68.2045	165.767	110.743
	40008619	23244241	14561905	17473989	33947068	26766067	17332173	43117921	38763697	24355480		216.11	125.556	78.6572	94.3871	183.368
	20969569	26624667	10663042	20100143	49649594	21472334	24604911	37362527	24772741	21473681		113.269	143.815	57.5972	108.572
	13523767	23708962	8115650	24481689	27448200	19495705	32675173	42042114	42981686	18247383		73.0497	128.066	43.8373	132.24	148.264
	17783045	33924092	8811614	16892442	32983386	22059325	23808198	62777223	38424991	20131427		96.0565	183.244	47.5966	91.2458	178.162
	15765268	18808363	18269549	32005418	22866070		27093025	28969349	19074123	18956535		85.1573	101.595	98.6844	172.88	123.513
	15076488	20164574	15034656	13642427	36192187	13790423	25958155	38816810	63930642	9981107		81.4368	108.92	81.2108	73.6906	195.495
	20615866	22423398	18785896	21200242	35786925	17400341	39205527	39253625	26697979	19134126		111.358	121.122	101.473	114.515	193.306
	26131340	25573684	10735402	17633277	45972701	16205703	18637823	40009324	19074123	11887165		141.15	138.138	57.9881	95.2475
	28818939	24280987	8694656	17366279	20480686	16656194	25364713	32229217	28259960	13900392		155.668	131.156	46.9648	93.8053	110.628
	12066989	15387134	14177170	16070768	57876766	12082480	20921367	32182684	27826954	13595609		65.1808	83.1148	76.5791	86.8075
	15186837	15338891	19950419	16546954	19879180	12998785	20906794	34166949	22454617	30272263		82.0329	82.8542	107.764	89.3796	107.379
	15180397	18457449	15377853	25755397	38746781	11290391	17907311	35201449	43282140	18084640		81.9981	99.6993	83.0646	139.12	209.294
	20233436	12920471	12141945	28164886	39520345	26663167	29444062	38291101	38861177	24539518		109.292	69.7909	65.5856	152.135	213.472
	14441625	8236804	18111955	12960660	47894762	21017120	26387017	21216477	26875397	15032550		78.0075	44.4917	97.8331	70.008
	16523595	18754788	12499599	18349842	55619212		20197741	34912047	45739976	19641148		89.2535	101.305	67.5175	99.1181
	10807680	9855176	12704328	25476031	34393278	20339779	27847593	38164230	66997555	14510137		58.3785	53.2335	68.6234	137.611	185.778
	13168794	13731812	15921041	23670212	15505002	29916676	22113744	35387764	39439963	16909804		71.1322	74.1734	85.9987	127.856	83.7515
	16603444	13039031	21954936	11081784	29291742	23693814	23964226	27488823	36881560	20086668		89.6848	70.4313	118.591	59.8591	158.222
	15154304	12415160	13883642	10493002	41147743	26679936	59585556	28995687	31103352	29729280		81.8571	67.0614	74.9936	56.6788	222.263
	16619327	9284644	14601131	22198217	41434705	14906836	26772596	34070258	22705638	31827240		89.7706	50.1517	78.8691	119.905	223.813
	17016273	7132233	15197278	18842727	40575307	22355018	21099704	29788951	31095206	29115952		91.9147	38.5253	82.0893	101.78	219.171
	19743259	10872472	15961900	20761254	57515791	13935782	21352903	37350250	42395541	18221409		106.645	58.7285	86.2194	112.144
	18132942	19144074	20744932	25376194	38061147	33445935	21565151	28750103	45442919	25396995		97.9465	103.408	112.055	137.071	205.59
	12158297	11268404	14791645	27013707	20401807	24922391	25066578	39353140	31159684	39473347		65.674	60.8671	79.8982	145.917	110.202
	24063989	8337514	19076544	30615140	20757444	35937824	21201091	23875770	30058676	13405787		129.983	45.0357	103.043	165.37	112.123
	18352097	8860067	13025572	34135472	72853678	16242918	22696598	25608739	25569370	16119468		99.1303	47.8583	70.3586	184.385
	11876054	17410264	12762952	34892474	46908635	46001838	22533955	29801768	46034859	18931668		64.1494	94.0429	68.9401	188.474
	12617498	12730116	13369140	20036832	22355125	15923529	16408370	47243789	23216950	21851993		68.1544	68.7627	72.2144	108.23	120.753
	12294339	8946727	13830685	19826037	47776166	24333594	23585238	23365736	27248256	24819751		66.4088	48.3264	74.7075	107.092
	16778354	6281101	18776103	28727951	44924201	15581988	19796065	32013884	24299205	16343284		90.6296	33.9278	101.421	155.176
	12722270	8316280	14838634	37426475	36018424	15027031	40407841	25709781	16154166	17181032		68.7203	44.921	80.152	202.162	194.556
	13401933	10878907	8228362	20235840	46747006	35200208	22262934	30995365	31177012	37023072		72.3916	58.7632	44.4461	109.305
	18635753	8423666	14604428	17356836	60738442	19300706	38817087	44741276	19735646	14682902		100.662	45.5011	78.8869	93.7543
	12482851	8357772	24463396	16454954	29071614	24515099	33064839	16168731	55779869	17410994		67.4271	45.1451	132.141	88.8827	157.033
		7442327	13910686	20624569	30761834	20334473	42917635	36503515	25384097	21720748			40.2003	75.1396	111.405	166.162
	19176642	9085476	23499498	16864300	25406137	12368215	29839920	39876839	22299877	13700825		103.584	49.0759	126.934	91.0938	137.233
	17789616	13698175	11079708	20129067	40181038	35959422	29825316	21067791	24500051	17624989		96.092	73.9917	59.8479	108.729	217.041
	18185693	15083366	15184376	20106613	36531037	19037177	23560774	28795922	16523337	23740103		98.2314	81.474	82.0196	108.607	197.325
	28762760	13012772	13251356	20494791	49257428	18587954	27416589	24552159	45302043	14055605		155.364	70.2895	71.5782	110.704
	19776484	11335393	15455125	17983472	32680833	15694802	20021988	40735120	39055932	43993473		106.824	61.229	83.482	97.1391	176.528
	28135871	12641860	9653781	21182031	63052391	12082827	33940135	42996381	58892714	23922672		151.978	68.286	52.1456	114.416
	30824644	10855056	16833635	22392319	43188672	21253522	35634005	41885202	37313930	20955158		166.502	58.6344	90.9282	120.954	233.287
	35088458	10812836	20143300	15720204	43632047	31492321	24273839	33607999	62737110	24233708		189.533	58.4064	108.806	84.9139	235.682
	30421742	10744761	15993739	18510772	23670200	39065291	23406828	56426125	64084356	15114018		164.325	58.0386	86.3914	99.9874	127.856
	25602686	12937947	9381578	16885764		26475413	18137473	30292268	42191210	20228693		138.295	69.8853	50.6753	91.2097
	36642665	9837587	9363899	18644816		27005717	19894332	32583758	52861700	22335712		197.928	53.1385	50.5798	100.711
	24637144	7884111	10508635	24199628		25161247	35185498	19000820	72071148	25105355		133.079	42.5866	56.7632	130.716
	12542734	8549592	15411774	24111661		18393103	20599644	24689513	37315708	14432177		67.7505	46.1813	83.2479	130.241
		15572795	17068306	16657648		19997305	25785170	24796527	43039552	14663781			84.1176	92.1958	89.9776
		10444830	20584732	34767770		17829430	27375537	14184727	34811809	15049310			56.4185	111.19	187.801
		10797709	17052091	12275157		26620659	20312959	33863088	23657862	15987804			58.3247	92.1082	66.3052
	22886929	11425290	25188151	12928146		33122031	17926643	34921654	24018001	25323813		123.625	61.7146	136.056	69.8324
	20973580	13017378	13102982	13939748		14448577	24934476	24251175	25543312	36611731		113.29	70.3144	70.7768	75.2966
	17023128	9870869	17127735	12112773		27620471	51950478	20621141	26062778	38192174		91.9517	53.3183	92.5168	65.4281
	16910230	11279315	9128668	18359984		29601340	23445297	31686428	20926170	19860775		91.3419	60.9261	49.3092	99.1729
	13451867	10150353	17361322	16463846		28738867	55680272	45432575	30404449	18103526		72.6613	54.8279	93.7785	88.9307
	13156917	8561519	11760880	14149855		32605858	35216287	27313148	43425541	38110489		71.0681	46.2457	63.5273	76.4315
	23408445	12086819	14130447	10294846		16687222	38347546	25087262	32526388	14996657		126.443	65.2879	76.3267	55.6084
	13554116	8116068	11067226	15706169		21951767	33727221	18752160	32580196	22712503		73.2136	43.8396	59.7805	84.8381
	21191097	8529790	13889520	15331849		16326338	34038994	23851929	34869246	29166910		114.465	46.0743	75.0253	82.8162
	15901427	8177078	14020094	12646113		21678406	22980533	31797615	47457505	28342445		85.8928	44.1691	75.7306	68.3089
	24794881	12145353	12944751	13999360		39196092	19101766	26694876	33232592	37607826		133.931	65.6041	69.9221	75.6186
	16364771	9915028	10912535	12576234		18507710	30521045	30842842	45290092	20111192		88.3956	53.5568	58.9449	67.9315
	13275094	9645340	16201900	19344228		15338044	29544184	40399626	39054259	29262075		71.7064	52.1	87.5158	104.489
	13885181	23433558	16251702	11801024		27380571	28351212	15411876	51860060	22751113		75.0019	126.578	87.7848	63.7441
	14868827	20867696	21861062	10078344		13049998	29106413	14776247	41912826	13385376		80.3151	112.718	118.084	54.4389
	12570014	25722250	11093570	19519628		23050390	32229982	22657519	35253669	16858460		67.8979	138.941	59.9228	105.437
	10533433	15269422	11043181	13348878			41171414	20074071	41887875	14001309		56.8971	82.479	59.6506	72.105
	10527363	14113334	12459414	19186916			34347910	26178961	49161100	28714693		56.8644	76.2343	67.3005	103.64
	11343686	21398981	16925128	13781441			33369690	30043222	34594058	16282762		61.2738	115.588	91.4224	74.4415
	12829206	12138125	12161074	11491060			35720241		33067635	15270560		69.2979	65.565	65.689	62.0698
	12759890	21492232	11212508	18675075			25037543		17039615	10768629		68.9235	116.092	60.5652	100.875
	13548007	20058371	19467127	11889424			20931043		23377823			73.1806	108.347	105.153	64.2216
	15078996	19061974	11334833	14042260			44277031		28316680			81.4503	102.965	61.226	75.8503
	18229175	22977495	15758125	10350724			27435229		15555791			98.4663	124.115	85.1187	55.9102
	14877326	8635213	14263297	10237945			36829489		25672820			80.361	46.6438	77.0443	55.301
	14826857	12933576	10872132	13008522			34968609					80.0884	69.8617	58.7267	70.2665
	11196693	8048062	18802005	12898916			35663394					60.4798	43.4722	101.56	69.6745
	11020933	9023185	14182921	16407115			25746432					59.5304	48.7394	76.6101	88.6243
	12387406	22673848	11211207	13865959			17644073					66.9115	122.475	60.5582	74.898
	9278721	13125819	10774233	10394581			16485464					50.1197	70.9001	58.1978	56.1471
	10038213	18440528	11392711				44678321					54.2222	99.6079	61.5386
	13159466	12449142	9207241				43516863					71.0819	67.245	49.7336
	20067816		11152440				18482337					108.398		60.2408
			13672152											73.8512
			8205407											44.3221
			6623968											35.7799
			8684334											46.9091
			8552943											46.1994
			8000985											43.2179
15.03.2022	10992643	52465806	27323368	32681674	26400677	58968174	42201075	23028930	43948384	22015028							159.796	114.359	62.4054	119.094	59.6579
	10155417	54635598	36454065	19573498	52228795	42409721	31651536	37049360	36004653	19108999							114.925	85.7716	100.399	97.5679	51.7829
	27096994	53797505	47671972	24195350	34704409	49293563	43564349	29406270	54649335	15968801							133.579	118.054	79.6872	148.093	43.2734
	8778835	37103378	36346401	18961994	25168572	51359289	27970252	34649940	42122720	14350412							139.177	75.7958	93.8968	114.147	38.8878
	12363433	30811245	30839061	18635037	51220922	19648261	20167252	29424660	62147176	19827162							53.2442	54.6506	79.737	168.411	53.729
	11747433	47863918	29234668	34454383	50407870	44742287	51327508	31919917	45146076	33998379							121.246	139.091	86.4988	122.34	92.1312
	11204608	57514945	27970133	45309778	51309156	55937929	32074058	32110872	34270900	48990750							151.585	86.9165	87.0163	92.8697	132.759
	23244116	36314221	18148554	17096784	26023792	37706275	25997008	39083283	24777814	34776165							102.179	70.4485	105.911	67.1447	94.2389
	16048667	41755963	20968972	19244651	43418175	50869126	45179356	44190578	37316594	27729496							137.849	122.43	119.751	101.123	75.1433
	12144065	48208645	19479192	51848616	48307856	32267686	32899003	44324625	47746749	54690576							87.4412	89.152	120.114	129.387	148.204
	10572162	44925724	50950327	20689781	40504532	40222465	42339671	35619130	56655532	23736344							108.998	114.735	96.5232	153.529	64.3224
	11757612	57656964	17191654	24520608	39860986	60691049	34355179	34272915	28079655	26798137							164.465	93.0981	92.8752	76.0922	72.6195
	8986415	53637128	46805604	30538656	52229311	49293937	26327937	30787877	22524399	31688835							133.58	71.3453	83.4312	61.0382	85.8726
	8639850	48253283	67453517	31591265	31707253	40818097	41827419	31453138	45043650	30394198							110.612	113.347	85.2339	122.062	82.3643
	12203996	43909272	38573356	21670428	27854341	36954716	37726365	18769554	25044996	20886086							100.142	102.234	50.8631	67.8687	56.5986
	19743073	56246481	35237838	33151672	25737600	28014005	36819602	26751193	31770391	38371630							75.9143	99.7763	72.4923	86.0936	103.982
	16633218	42636732	64043497	32131418	58383558	40815680	41796765	46069170	33316665	25946055							110.605	113.264	124.841	90.2838	70.3104
	19214242	32490081	33908466	26779657	49292098	70495512	34774122	36271022	30425831	21452493							191.034	94.2334	98.2898	82.4501	58.1335
	21505411	38850945	41564273	30492497	29077078	34322802	34631883	30795586	32456577	35605265							93.0103	93.8479	83.452	87.9531	96.4857
	15590510	49510072	22830264	21635634	38905357	40011915	39729068	43245344	40201882	45434154							108.427	107.661	117.189	108.942	123.121
	13931888	39492503	28521527	21744757	47158508	36647357	38919743	48657239	23774476	28769798							99.3096	105.467	131.855	64.4257	77.9624
	36167187	34246445	17237091	36016560	81134267	27529215	25356560	37317506	65019029	36644234							74.6006	68.713	101.126	176.193	99.3011
	22466965	31506069	18625878	36169108	72786471	20391732	49748930	35871349	34178647	19093934							55.2589	134.813	97.2067	92.6197	51.7421
	8671487	38132840	36441678	24772309	65361254	27829075	46963891	53017657	36217511	20161013							75.4132	127.266	143.671	98.1448	54.6337
	7375908	50850207	45022878	21817793	85505833	34886988	25358874	33311413	32426306	30089241							94.5392	68.7193	90.2696	87.8711	81.5379
	9294017	48562349	36648306	20053824	68758851	25733316	26044025	50398437	28279314	24634028							69.7339	70.5759	136.573	76.6333	66.755
	26763437	39430421	35941455	17336424	51401034	26110224	44549294	29147444	20631687	29014911							70.7553	120.723	78.9858	55.9092	78.6266
	8652736	53394985	47668879	21639262	47042902	37067623	42398543	39882709	51143389	22835731							100.448	114.895	108.077	138.592	61.8819
	13320254	44137811	30325254	41128558	50660514	36006986	49842332		24003230	23212485							97.5743	135.066		65.0456	62.9028
	11401345	46476629	40153892	21953675	78659570	58399897	53843548		57135116	20451765							158.256	145.909		154.829	55.4216
	17720081	26595593	43489656	20728634	90771651	39917349	28339949		40547153	27209304							108.171	76.7976		109.878	73.7337
	15692632	35397582	42118947	17655339	33380021		50745326		19107537	16588422								137.513		51.7789	44.9525
	18670273	29306489	39345439	15010912	42049587	39622074	53195043		11792237	24984016							107.371	144.152		31.9554	67.7034
	9694128	36556399	35136330	27214371	34652595	43252841	27129518		30044706	19791233							117.21	73.5175		81.4173	53.6317
	13953968	41696834	51092170	22986044	63391439	29909281	22191179		27970343	16481340							81.0503	60.1352		75.796	44.6623
	11407019	26425400	38565362	21181989	41539741	20209451	26125296		20333606	18205217							54.765	70.7962		55.1014	49.3338
	18907698	27760596	56532080	28706024	51815280	25470721	40602029		22694865	17314313							69.0224	110.026		61.5001	46.9195
	17925424	29356473	29112177	22499874	39134374	53018077	61180497		22007387	18766302							143.672			59.6372	50.8542
	13619747	38669371	23392710	18662039	43536220	53510566	43928482		44213371	37255875							145.007	119.04		119.813	100.959
	20381808	33068080	42457595	18251284	49734708	33477782	60641821		27662799	35628452							90.7204			74.9626	96.5485
	13606426	27953335	43209074	16365840	41108359	27728681	32774891		29203177	53804034							75.1411	88.8157		79.1368	145.802
	13325918	22798977	44584313	23348595	54002060	34157382	31544770		32073670	37742820							92.5621	85.4822		86.9155	102.278
	9391500	27758148	38095051	20252143	39320354	23543905	28000607		25194224	27128200							63.8009	75.878		68.2731	73.5139
	12279958	31231973	47147197	16720703	58597975	32176538	31028959		17257973	44851077							87.1942	84.0845		46.7669	121.541
	8547151	29473043	36643741	17434512	34493460	26523803	33585277		22525646	57211435							71.8761	91.0117		61.0416	155.036
	13107793	25119416	26486970	29991906	32579474	30796768	52738909		19649561	36926330							83.4552	142.916		53.2478	100.066
	19054553	35027496	31149310	22138263	52909591	23088100	42515062		24298276	27118813							62.5658	115.21		65.8452	73.4885
	16884892	32372445	31474442	22456232	50339382	19128987	43052591		24810397	37488903							51.8371	116.667		67.233	101.59
	16969441	34752835	51316044	21103727	34316878	23413903	29117526			32957458							63.4486	78.9047			89.3104
	28996398	28407510	43871636	22868408	58822776	29619586	33039773			36442106							80.2652	89.5335			98.7534
	32115223	45526490	34264930	19569117	31642798	30001146	28529916			27624253							81.2992	77.3124			74.8581
	23026271	32556218	30424395	27814631	29854964		50885343			24583263								137.893			66.6175
	19041947	46721673	49631400	28451221	81281907		27793621			12360091								75.3171			33.4942
	18863460	41050120	38720173	20691063	48811487	21128846	36999270			8354586							57.2564	100.263			22.6398
	16790502		21949938	26503679	51906081	55271576	44506544			26516074							149.779	120.607			71.8551
	19499958			26986875	70835364		22956916			32734290								62.2103			88.7057
	20240587			48778259	55897356	25400878	55126590			40405384							68.8331	149.386			109.493
	18618404			20886194	70180152		18600939			43300006								50.4061			117.337
	16488079			22129366	31310114		55017499			29349349								149.09			79.5329
	23399655			21423266	39899078		40923627			26525140								110.898			71.8797
	18683983			29664359	25623373		31125211			21346721								84.3453			57.8468
	21481852			22053958			47430391			32056130								128.53			86.868
	36334440			18477430			35378299			38743624								95.8706			104.99
	14824498			21270437			41738166			23929966								113.105			64.8471
	22045490			24026896						39764953											107.758
	15344176									17057758											46.2243
	20198317									25960334											70.3491
	20240419									41680455											112.949
	24466958									31185859											84.5096
	25991054									39763412											107.754
	20211829									26011634											70.4882
	13088326									30805037											83.4777
	29221681									29482248											79.8931
	24269411									51347937											139.146
	16676017									27150124											73.5733
	21566526									22501728											60.9768
	14981058									17757141											48.1195
	17179794									23633254											64.0431
	31861290									20942809											56.7523
	13519347									14588292											39.5324
	27324540									14142242
	21511254
	39633853
	27536631
	19065889
	21465409
	19428538
	20817882
	18871349
	19470840
	41268475
	15640018
	33022385
	21977954
	39988407
	21190301
	17351867
	22639696
22.02.2022	29162135	5651445	5507770	12359657	21951608	31167634	22077415	38173872	36531251	13816937		127.152	24.6413	24.0149	53.8903	95.7129	122.166	86.5359	149.628	143.19	54.1576
	32006180	4100760	5722843	9173812	18484722	21749526	17228320	51707196	51135574	9464790		139.553	17.88	24.9526	39.9995	80.5967	85.2507	67.5291	202.674	200.434	37.0987
	44631072	8177672	6742553	8222474	23525170	23167346	20500076	28724576	46127645	27785479		194.599	35.6561	29.3987	35.8515	102.574	90.808	80.3532	112.59	180.804	108.91
	28448497	11784609	5437801	6500850	27631711	27049824	14600196	22620630	56290751	46822433		124.041	51.383	23.7098	28.3449	120.479	106.026	57.2277	88.6651	220.64	183.528
	32791611	6955184	7262066	8747114	26301517	35492230	29741175	28662032	56132245	48728537		142.977	30.3258	31.6639	38.139	114.679	139.117	116.575	112.345	220.019	190.999
	29895595	11906494	5080481	15332484	37744692	28300468	21286671	29156803	59419667	30082276		130.35	51.9144	22.1518	66.8524	164.574	110.928	83.4364	114.285	232.905	117.912
	38537611	40007435	4852659	10930599	16851835	40424325	31898712	34467895	52662921	26464855		168.031	174.44	21.1585	47.6594	73.477	158.449	125.032	135.102	206.421	103.733
	34419585	4042554	7949917	13934735	17288546	40149520	21102521	25825512		25404655		150.076	17.6263	34.6631	60.7579	75.3811	157.372	82.7146	101.227		99.5775
	29034819	35587453	7440568	9938626	22168308	20328782	25519818	21706819		21216827		126.597	155.168	32.4422	43.3342	96.6578	79.6818	100.029	85.0833		83.1627
	30584638	60152147	23145450	8948991	24075442	26923713	22119174	45196425		26544129		133.354		100.918	39.0192	104.973	105.532	86.6995	177.154		104.044
	34741793	47106293	35588112	17182222	22484841	26517225	45784497	20116282		25683839		151.48	205.392	155.171	74.9176	98.0379	103.938		78.8489		100.672
	29215816	56585066	51837007	9243918	23463739	15027107	18964563	19373401		36133522		127.386		226.019	40.3051	102.306	58.9011	74.3346	75.9371		141.631
	37549315	41273531	41784605	9892072	27291381	43738488	5887390	34442527		26184427		163.722	179.96	182.188	43.1312	118.995	171.44		135.003		102.634
	22856549	31793534	34680504	12091615	28140198	32017688	13976851	18265894		36451031		99.6586	138.625	151.213	52.7216	122.696	125.498	54.7844	71.596		142.875
	17408402	36311339	42000905	13996259	17398979	40874722	30890342	16547848		38336303		75.9037	158.324	183.131	61.0262	75.8627	160.215	121.08	64.8619		150.265
	23886503		53268156	8875083	29013119	24321780	33282929	20258233		42387420		104.149		232.259	38.6969	126.502	95.333	130.458	79.4053		166.144
	14416249		31204943	10776338	17358249	31063510	30678684	16363449		38026629		62.8574		136.059	46.9868	75.6851	121.758	120.25	64.1391		149.051
	16805907		60233935	7532122	18588034	47188756	34580944	16327298		23625992		73.2768			32.8414	81.0471	184.964	135.545	63.9974		92.6058
	37237580		43433462	9413784	37722500	26344272	20182645	18639067		19687610		162.362		189.378	41.0458	164.477	103.26	79.109	73.0587		77.1687
	25382859		46043488	10156123	22395787	41195125	21475785	21600727		30585081		110.674		200.758	44.2825	97.6496	161.471	84.1777	84.6674		119.883
	20849561		51055165	10157864	27252950	27679571	28724572	40968749		33099718		90.9078		222.61	44.2901	118.828	108.494	112.59	160.583		129.74
	24091276		5907863	12996985	24172625	19535452	21540118	23685630		37192013		105.042		25.7593	56.6692	105.397	76.5722	84.4298	92.8395		145.78
	26689336		8130342	9286156	27969038	14056427	28769444	28759810		26759016		116.37		35.4497	40.4893	121.95	55.0964	112.766	112.729		104.886
	16295915		3313326	15209736	29867009	30116270	19686262	31452386		18602117		71.0531		14.4467	66.3172	130.225	118.045	77.1634	123.283		72.9139
	28191538		7819160	6864390	45156038	34328494	36017094	30511700		17221113		122.92		34.0929	29.93	196.888	134.556	141.175	119.595		67.5008
	14145233		9045478	7197880	26441855	17880330	19189948	26478213		25594036		61.6757		39.4399	31.384	115.291	70.0847	75.218	103.785		100.32
	16756453		7928094	10169860	24540659	21100301	57989146	45835617		15139705		73.0611		34.5679	44.3424	107.002	82.7059		179.66		59.3424
	18659445		5789320	10053906	22379828	17671846	22275891	39627651		34645158		81.3585		25.2425	43.8368	97.58	69.2676	87.3138	155.327		135.797
	22935734		7948385	7266047	25362705	30102479	21362366	17911487		17701704		100.004		34.6564	31.6813	110.586	117.991	83.7331	70.2069		69.3846
	23864999		8465640	19010512	16939008	29319015	18017486	26504114		18591083		104.056		36.9117	82.8892	73.8571	114.92	70.6223	103.887		72.8706
	29192054		7280568	8391054	17685045	25000436	21730175	36834893		22366274		127.283		31.7446	36.5865	77.11	97.9931	85.1748	144.38		87.6681
	14419098		10850457	8117519	21080018	16528804	29509398	14309178		22432636		62.8698		47.3099	35.3938	91.9126	64.7872	115.667	56.0871		87.9282
	19609702		16661433	6635227	47788834	20437335	14398416	26585727		26021351		85.5018		72.6468	28.9308	208.368	80.1073	56.4368	104.207		101.995
	16986854		15464347	13164282	30732598	18745147	30781268	26289732		10834151		74.0657		67.4273	57.3986	134	73.4745	120.652	103.047		42.4661
	13766492		7469423	19499375	30026518	21246157	20630680	23470024		21890363		60.0244		32.568	85.0208	130.921	83.2776	80.8652	91.9944		85.8027
	13689015		5244427	16508498	28817999	18183096	16012857	10252415		40558014		59.6866		22.8666	71.98	125.652	71.2715	62.7649	40.1859		158.973
	9541312		10013030	14321625	32239401	20424438	26143672	12463122		36574121		41.6018		43.6586	62.4448	140.57	80.0568	102.474	48.8511		143.358
	14150597		17386515	16098379	17260615	13445587	28813080	15196599		16273885		61.6991		75.8083	70.1918	75.2594	52.7021	112.937	59.5654		63.788
	12460249		9023262	18772832	34305326	29031330	20836815			24084632		54.3289		39.343	81.8529	149.577	113.793	81.6731			94.4035
	11323679		16685327	13896816	27986969	19598351	19257147			13388812		49.3733		72.751	60.5926	122.028	76.8188	75.4814			52.4795
	22361504		7225057	18153033	32459020	13838420	18921425			12707660		97.5002		31.5025	79.1505	141.527	54.2418	74.1655			49.8097
	22588431		6750634	14159265	27648361	13153816	24935224			18017328		98.4896		29.434	61.7369	120.552	51.5584	97.7375			70.6217
	20281180		13800023	10865073	24751989	12978801	38726156			7989455		88.4296		60.1706	47.3737	107.923	50.8724				31.3159
	20643572		17280054	15462736	48525207	17874262	16789741			16101427		90.0097		75.3441	67.4203	211.579	70.061	65.81			63.1121
	23138849		8701499	15241159	32670877	29315940	14558926			20558085		100.89		37.9401	66.4542	142.451	114.908	57.066			80.5806
	16419472		7075832	13575187	30524246	18938303	20226663			15536023		71.5918		30.8519	59.1902	133.091	74.2316	79.2816			60.8959
	14959897			21463849	32948292		16572486			17208136		65.2278			93.5862	143.66		64.9584			67.45
	27464913			12568675	34002032		13620410			11964640		119.752			54.8017	148.255		53.3873			46.8973
	12899081			15551818	48788765		17944518			20499549		56.2423			67.8087	212.728		70.3363			80.3512
	11768116			16541965	32130817		19693102			10476015		51.3111			72.1259	140.096		77.1902			41.0624
	12075575			19179270	33499733		20918026			17669913		52.6517			83.625	146.065		81.9915			69.26
	24289857			14934778	35009550		46368305			29030811		105.908			65.1183	152.648					113.791
	17638951			16922065	35466548		43035907			17628658		76.909			73.7832	154.64					69.0983
	21586988			16629113	39331249		37868201			48433567		94.1231			72.5059	171.491		148.43			189.843
	26060670			18066214	53860485		26482068			12016781		113.629			78.7719	234.841		103.801			47.1016
	23312430			17157583	49486422		19240139			22043034		101.646			74.8101	215.77		75.4147			86.4011
	36541535			14964644	20550350		23934430			11333497		159.328			65.2485	89.6032		93.8147			44.4234
	19911405			16235989	34197656		25399801			7607262		86.8173			70.7918	149.108		99.5585			29.8178
	24191585			14246609			30174008			23681273		105.48			62.1178			118.272			92.8224
	25244222						18718613			22969160		110.069			0			73.3705			90.0312
	32313622			15651068			23811784			36410226		140.893			68.2415			93.334			142.716
	30449839			15749783			15950021			24152508		132.767			68.6719			62.5186			94.6695
	30129005			19210377			16128563			23612806		131.368			83.7607			63.2184			92.5541
	18428110			19251962			26566640			21328245		80.3499			83.942			104.132			83.5994
	15263258			13324375						21745406		66.5505			58.0967						85.2345
	16967040			13366975						19385956		73.9793			58.2824						75.9863
	19580975			10567129						14418886		85.3765			46.0746						56.5171
	40650870			14423664						10220202		177.245			62.8898						40.0597
	19158189			12517149						16491793		83.5331			54.577						64.6422
	26615344			15021268								116.048			65.4954
	14444089			16820487								62.9788			73.3403
	19241324			23765504								83.8956			103.622
	10992189			17527927								47.9279			76.4249
				11605857											50.6036
				14264923											62.1976
				21908479											95.5249
				17381536											75.7866
				13965581											60.8924
				15722762											68.5541
				16859670											73.5112
				14081679											61.3986
				15578956											67.927
				14444797											62.9819
				17974585											78.3724
				15262244											66.5461
				9411135											41.0342
				10649487											46.4337
				10264324											44.7543
												100	84.403	76.0018	80.4064	144.331	100.322	90.4806	90.7875	74.0026	77.4334
												35.7678	42.7296	40.6874	34.0525	44.0363	33.6689	25.2672	33.129	45.5288	33.3532
												2.7678	4.07411	3.33324	2.51723	4.36025	2.6291	1.80942	2.87265	4.13899	2.27467
													0.00115611	5.20697e-08	3.58641e-07	3.733e-17		0.00891025	0.0261833	5.36411e-06	5.55482e-09
													***	***	***	***		***	*	***	***

## Sheet: Graph
		PLA					IF Pol2					IF 6-4PP
Compared to NoUV of each siRNA
